# Supplementary material for: Thalidomide promotes degradation of SALL4, a transcription factor implicated in Duane Radial Ray syndrome
Source: eLife journal article supplement (doi:10.7554/elife.38430), 2018-08-01
Supplement: supp [file elife-38430-supp-v1.zip]

Archive with 25 entries (25 files):
- elife_poa_e38430_Figure_1_figure_supplement_2.ai
- elife_poa_e38430_Figure_1_figure_supplement_1.ai
- elife_poa_e38430_Figure_2_source_data_2.pdf
- elife_poa_e38430_Figure_1_source_data_2.csv
- elife_poa_e38430_Figure_1_source_data_3.csv
- elife_poa_e38430_Figure_2_source_data_1.pdf
- elife_poa_e38430_Figure_1_source_data_15.pdf
- elife_poa_e38430_Figure_1_source_data_4.csv
- elife_poa_e38430_Figure_1_source_data_5.csv
- elife_poa_e38430_Figure_1_source_data_12.csv
- elife_poa_e38430_Figure_1_source_data_14.csv
- elife_poa_e38430_Figure_1_source_data_9.csv
- elife_poa_e38430_Figure_1_source_data_10.csv
- elife_poa_e38430_Figure_1_source_data_6.csv
- elife_poa_e38430_Figure_1_source_data_11.csv
- elife_poa_e38430_Transparent_Reporting_File.pdf
- elife_poa_e38430_Figure_4_source_data_1.pdf
- elife_poa_e38430_Figure_1_source_data_13.csv
- elife_poa_e38430_Figure_2_figure_supplement_1.ai
- elife_poa_e38430_Figure_1_source_data_1.csv
- elife_poa_e38430_Figure_3_source_data_1.pdf
- elife_poa_e38430_Figure_1_source_data_8.csv
- elife_poa_e38430_Figure_1_source_data_7.csv
- elife_poa_e38430_Figure_4_figure_supplement_1.ai
- elife_poa_e38430_Figure_3_figure_supplement_1.ai
