# Supplementary material for: Thalidomide promotes degradation of SALL4, a transcription factor implicated in Duane Radial Ray syndrome
Source: eLife journal article supplement (doi:10.7554/elife.38430), 2018-08-01

Figure 1 - source data 2

A

Related to Figure 1 - figure supplement 2D

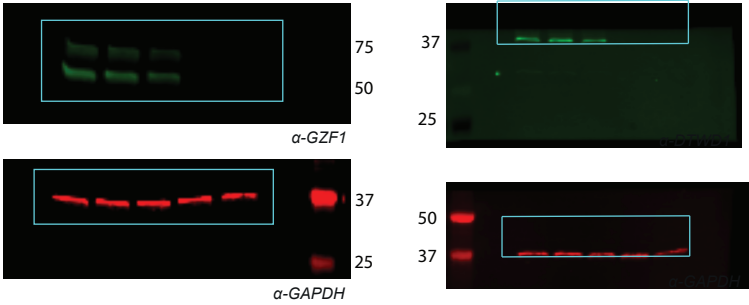

Supplement: supp [file elife-38430-supp-v1.zip]
