# Supplementary material for: Thalidomide promotes degradation of SALL4, a transcription factor implicated in Duane Radial Ray syndrome
Source: eLife journal article supplement (doi:10.7554/elife.38430), 2018-08-01
Supplement: supp [file elife-38430-supp-v1.zip › elife_poa_e38430_Figure_1_source_data_1.csv]

	ID	logFC	AveExpr	t	P.Value	adj.P.Val	B
Q9UJQ4	SALL4	-1.58208369888834	3.49389990715975	-47.3486248939191	1.33061010216307e-08	0.000102084407037951	6.8549320990608
Q9H8Y1	VRTN	-0.409603394734603	3.4852315668779	-15.6056906228479	6.95492283536305e-06	0.0266790839964527	3.81986823978126
Q15181	PPA1	-0.127995885046696	3.11763670344029	-9.73122193102318	9.34342485798588e-05	0.143365511020935	2.17974704260156
O00622	CYR61	0.440388189518101	3.37346220865245	10.6360441193466	5.76713731087581e-05	0.110613693622598	1.696824581942
P08708	RPS17; RPS17L	-0.131902214822324	3.35135104128013	-8.30343513321753	0.000218644772005193	0.239634670117692	1.3443765703533
P26599-3	PTBP1	0.144406680242607	3.34062066456605	7.78898409169534	0.000306564020003458	0.281469087637113	0.834574608477061
O15060	ZBTB39	-0.563255582609608	3.48465512987231	-8.448145073466	0.000199466102712406	0.239634670117692	0.817963422074815
P37837	TALDO1	-0.103659129037247	3.24650938358242	-7.39081715122121	0.000403566210115777	0.281469087637113	0.740026450385101
Q8NEG4-1	FAM83F	-0.559730110235237	3.70308297295341	-12.7416283820133	2.14147230258798e-05	0.0547645850181832	0.494692379636091
P43034	PAFAH1B1	-0.131699483256614	3.31474721786403	-6.98760884390686	0.000540053842042302	0.294951424829053	0.445122145082378
Q86YP4-3	GATAD2A	-0.109777014995892	3.38294978355318	-6.79570901938461	0.000623412599261476	0.294951424829053	0.324636805963113
Q9UKK9	NUDT5	-0.183859495455592	3.2904246951954	-6.61844744568088	0.000713905493967943	0.294951424829053	0.192882536317921
Q14566	MCM6	-0.076207436473869	3.35794624039113	-6.73140861525732	0.000654611609447576	0.294951424829053	0.138206254109813
O15212	PFDN6	-0.187879263156141	3.26538706183286	-6.67996643073283	0.000680877540967806	0.294951424829053	0.135175356974661
P31943	HNRNPH1	0.0917808297923247	3.32394965718011	6.63054375590637	0.000707267443571386	0.294951424829053	-0.0256328100082577
P61587	RND3	0.277842403110347	3.36117646724237	6.58884173802776	0.000730458429581857	0.294951424829053	-0.151559144827305
O15020	SPTBN2	0.109778718125088	3.32856960329003	6.23359975527009	0.000968067263091878	0.304263848565936	-0.154975396491091
Q8IY67-2	RAVER1	0.0912092519276935	3.30851872627562	6.13862011821511	0.00104600166781962	0.304263848565936	-0.178081690751207
P54577	YARS	-0.0833961411800034	3.26370672238423	-6.49392314013348	0.00078660081226608	0.301740071585268	-0.184738277370651
Q15643	TRIP11	0.107011052257912	3.3277905760674	6.19425542312048	0.000999508377819193	0.304263848565936	-0.205724540766151
Q8TD10	MIPOL1	0.147797751283608	3.36135639195724	6.10764444936939	0.00107296696634303	0.304263848565936	-0.222656992514131
Q8N5C7-1	DTWD1	-0.252529646543364	3.61382374304704	-6.42744152157998	0.000828900066180745	0.302824824178032	-0.246382627994095
Q6GMV3	PTRHD1	-0.24495119330383	3.36662941527583	-6.62527827872561	0.000710148146790048	0.294951424829053	-0.32317386713586
Q01844-5	EWSR1	0.121461908278017	3.33507852023807	5.81052488431149	0.00137677119880065	0.304263848565936	-0.421554553479145
P63151-2	PPP2R2A	-0.118143324289724	3.33117362325408	-5.81359369317383	0.00137316330841777	0.304263848565936	-0.427620691700382
Q9H993	C6orf211; ARMT1	-0.251004909020544	3.32219729863071	-5.75982804324518	0.00143798204146159	0.304263848565936	-0.463331710034345
Q13151	HNRNPA0	0.212033424772972	3.3702932167539	5.86008854048215	0.00131981130828769	0.304263848565936	-0.481749336879235
Q9BT78	COPS4	-0.0889451412679365	3.26650465536091	-5.83592124689896	0.00134723888174901	0.304263848565936	-0.503881676417346
Q96EP5	DAZAP1	0.163417978003805	3.31627911125557	5.70923361151162	0.00150221295535576	0.304263848565936	-0.504488730979468
Q66GS9-1	CEP135	0.142182786186797	3.28754032287865	5.67562808579771	0.00154670100287689	0.304263848565936	-0.53441008549444
O95989	NUDT3	-0.200177068872226	3.30055268857449	-5.79474214488359	0.00139549970279887	0.304263848565936	-0.537860462076349
P55786	NPEPPS	-0.0811579528666665	3.31531874165428	-5.93377577651464	0.00124007071713781	0.304263848565936	-0.540063553913907
Q8TDN6	BRIX1	0.0971315631039011	3.36843603283792	5.683286604928	0.00153643055461558	0.304263848565936	-0.542302826433714
Q9BYT8	NLN	-0.102944844507024	3.37976864538036	-5.80694541352721	0.00138099325454045	0.304263848565936	-0.582073823367115
Q9HCL2	GPAM	0.275304892433703	3.30249804070253	5.98339542844688	0.00118950087175658	0.304263848565936	-0.58541697094241
Q9HCK1	ZDBF2	0.16017111571435	3.23900326448958	5.54246068976232	0.00173854251451909	0.317573765985488	-0.670741967820171
O95235	KIF20A	0.104071439620863	3.3650331653154	5.61963112940333	0.00162424200065404	0.309836284088823	-0.695638089148368
Q96JP5-1	ZFP91	-0.542887461545821	3.21229921572072	-7.40095349270219	0.000400690322711282	0.281469087637113	-0.71373246900183
Q8IYD1	GSPT2	-0.17214157795127	3.42617217298528	-5.32728523548132	0.00210935520222045	0.369897563699382	-0.851553832199162
O75828	CBR3	-0.325045424416132	3.14418398416227	-6.14620189694199	0.00103952113200696	0.304263848565936	-0.944523403432783
Q9UK61	FAM208A	0.0807184705118383	3.3111902455483	5.32103320515884	0.00212141459890156	0.369897563699382	-0.965067912118142
Q8NDT2	RBM15B	0.103175303783913	3.35208815885382	5.13912905763413	0.00250945744239853	0.425367570642435	-1.0220225463751
P26006-1	ITGA3	0.281605877958281	3.35886030681414	6.020637449394	0.00115310452034252	0.304263848565936	-1.03768469569191
Q5U5X0	LYRM7	-0.507826103916636	3.19455240911774	-7.59416941294451	0.000350168414210123	0.281469087637113	-1.10188296312596
Q9BRJ2	MRPL45	-0.113005204154066	3.30308305369609	-4.96885253019506	0.0029479458527004	0.426283986346231	-1.14060633556135
O95490-6	LPHN2; ADGRL2	0.10291624847082	3.39670518260156	4.99106660103441	0.00288604373030151	0.426283986346231	-1.14584082056626
Q96MT8-2	CEP63	0.268063759342267	3.30952351449629	5.59771612907869	0.00165579870276874	0.309836284088823	-1.15458031499361
Q9UL46	PSME2	-0.119322548409523	3.09322923838909	-4.94486522722177	0.00301649984665821	0.426283986346231	-1.16103025312319
P04080	CSTB	-0.248123589807801	2.5603959189794	-5.03841545455884	0.00275899545905689	0.426283986346231	-1.22507671541402
Q96GM5	SMARCD1	0.0776375769206028	3.37906218177477	4.97040557718512	0.00294356909200732	0.426283986346231	-1.24813166934009
Q9Y224	C14orf166; RTRAF	-0.0777246875744135	3.3334754094324	-4.91760340319892	0.00309663415012737	0.426283986346231	-1.34516503356073
Q9BYN8	MRPS26	-0.199836353285183	3.31889817105219	-4.89559148877238	0.00316311397013918	0.426283986346231	-1.35381576167957
Q8TAT6-2	NPLOC4	-0.108381816341063	3.27769493949056	-4.79114732231365	0.00350161646424543	0.442038041711919	-1.35898740441043
P25054-1	APC	0.116118253277972	3.3487178343968	4.74711460526866	0.00365657618065897	0.442040569902182	-1.36667124844524
Q99417	MYCBP	-0.173915798392032	3.28218585208915	-4.73857866858577	0.00368751257478358	0.442040569902182	-1.39092291195986
O75935	DCTN3	-0.180508870923216	3.24025215093309	-4.87175444865402	0.00323695123892658	0.426283986346231	-1.40550000261501
O75937	DNAJC8	-0.0996724573602966	3.24737483244807	-4.73955717497562	0.00368395112179152	0.442040569902182	-1.41232364870913
Q9Y4E8	USP15	-0.0701406991705247	3.30272857249951	-4.78736173431508	0.00351464032122354	0.442038041711919	-1.43050080900544
Q86W42	THOC6	0.129100340682538	3.31877568291059	4.64998149580182	0.00402685875139139	0.45610620052997	-1.4309282608081
Q03252	LMNB2	0.152519132347427	3.3341929627918	5.00753342952765	0.00284111537318626	0.426283986346231	-1.43966580478873
P30085-1	CMPK1	-0.132680704105937	3.08837851911283	-4.53428743983151	0.00452485577300812	0.465013231220404	-1.54764731043843
P51157-1	RAB28	-0.277949135329959	3.39209166342543	-5.12182501985714	0.00255043121083838	0.425367570642435	-1.5509057001043
P35268	RPL22	-0.118410729367195	3.38634958308581	-4.51694815898203	0.00460536832386796	0.465013231220404	-1.55380769238894
O60684	KPNA6	0.152241691471633	3.3005621399316	4.50388452901006	0.00466710359801501	0.465013231220404	-1.56469368885641
Q9BZK7	TBL1XR1	0.114265673474804	3.18361526457977	4.50728844816743	0.00465092745184378	0.465013231220404	-1.56639060667864
Q15642-2	TRIP10	-0.12203607511505	3.32954213381294	-4.51904511544065	0.00459554535717768	0.465013231220404	-1.60950579953309
Q9BX68	HINT2	0.12394608330662	3.13633407907053	4.44881283830389	0.00493790518756185	0.467698871592278	-1.61582706662451
Q8WXI9	GATAD2B	-0.131227712539187	3.24732941131579	-4.45878765699593	0.00488756016281595	0.467698871592278	-1.62057941331356
Q12893	TMEM115	0.159109535491812	3.23279767201507	4.45107200424645	0.00492645131972692	0.467698871592278	-1.64447730666584
P46939	UTRN	0.0603361625938902	3.34982899041332	4.89042622955212	0.00317894914878664	0.426283986346231	-1.66630050525344
O75531	BANF1	-0.373362181641269	3.09225699201885	-4.66213404038364	0.00397827080971334	0.45610620052997	-1.67529866483192
P52701	MSH6	-0.052932134743098	3.38358370846619	-4.90610008980023	0.00313117492593821	0.426283986346231	-1.68194723486404
P11177	PDHB	-0.119336535429593	3.29886153881097	-4.58264332123898	0.00430864577983755	0.460851721900016	-1.68879839953606
P47974	ZFP36L2	-0.196811434421173	3.35497687161187	-4.38285164646197	0.00528603336551458	0.482791047383665	-1.68989658471726
Q2NKX8	ERCC6L	-0.100467393495974	3.38236788403192	-4.60642991033116	0.00420661915048879	0.460851721900016	-1.72128578387878
Q9UQR0	SCML2	0.087961772193157	3.24722144885935	4.46947287527993	0.00483427516651101	0.467698871592278	-1.74015766973205
Q8NEY1-2	NAV1	-0.0493245558449357	3.42946437692902	-4.6460674398682	0.00404265141241371	0.45610620052997	-1.79313691385884
P56556	NDUFA6	-0.192608464699687	3.27735205237119	-4.26530235922664	0.00597772743041298	0.497775792586512	-1.79504934304113
Q86Y13	DZIP3	0.096004134729179	3.370031420249	4.25641822123472	0.00603403919584797	0.497775792586512	-1.81532017617219
Q9HB71	CACYBP	-0.0744535595619636	3.3014239234848	-4.61668899666972	0.00416346599893243	0.460851721900016	-1.81948747437739
O94855-2	SEC24D	-0.0826289285318355	3.37464763851965	-4.40652414793218	0.00515798665132163	0.479240257302871	-1.8575661923166
P31689-1	DNAJA1	-0.0934245805307779	3.32442438850793	-4.57889238709726	0.00432499009082393	0.460851721900016	-1.85844407091003
Q14678-1	KANK1	0.0819881829711931	3.39318354278999	4.26298079726742	0.0059923849247868	0.497775792586512	-1.94351356102048
Q6IAA8	LAMTOR1	0.096843308817645	3.25820137826647	4.10658128594833	0.00708028033952552	0.567100317411475	-1.97289400435885
P14927	UQCRB	-0.213705654370745	3.25872730246725	-4.07235808860978	0.00734709335759923	0.567100317411475	-1.97773321173
Q8IYN2	TCEAL8	-0.164722811138848	3.45352785154612	-4.0738389802266	0.0073353157369562	0.567100317411475	-1.98828426339984
Q9HD67	MYO10	-0.121055691416332	3.39619418834856	-4.05800552019306	0.00746235233197351	0.567100317411475	-1.99241370228576
P39019	RPS19	0.0909880492727392	3.35501622322879	4.33281487899737	0.00556873032747486	0.495838918141235	-2.01634949750761
Q92610	ZNF592	0.0955588451150859	3.34112294744144	4.04612805424894	0.00755927860520409	0.567100317411475	-2.03955035142273
Q6P1K2	PMF1; PMF1-BGLAP	0.115855510481444	3.20534726275738	3.99661663249414	0.0079789009352764	0.567100317411475	-2.0514718668957
Q9UHB7-1	AFF4	0.0967778695943319	3.30089725036867	4.06341592613161	0.00741866593874856	0.567100317411475	-2.05617812123557
Q8NFD5-3	ARID1B	0.0597681568367698	3.3718543259024	4.33640650396406	0.00554787690025368	0.495838918141235	-2.05914612304242
Q86VY9	TMEM200A	0.317255552639154	3.40482558022783	4.85869018569656	0.00327825276256878	0.426283986346231	-2.06110693814781
Q02790	FKBP4	-0.051270670291451	3.34113548764722	-4.67497701826565	0.00392764658299265	0.45610620052997	-2.0660188480259
Q9UHD1	CHORDC1	-0.07286082460154	3.29354091836968	-4.29839774001413	0.00577312884864033	0.497656680076052	-2.09176449200001
O00487	PSMD14	-0.124541773258337	3.32418756230115	-4.10701731159783	0.00707695227536231	0.567100317411475	-2.10405635179062
Q8WV24	PHLDA1	0.330498935597721	3.37172678012134	5.06432708882914	0.00269218267453917	0.426283986346231	-2.12381783038835
Q53T59	HS1BP3	-0.167766087608536	3.11539100732934	-3.9475889670537	0.00842046063790066	0.567100317411475	-2.16442507809255
P25786-2	PSMA1	0.116148782385634	3.31200975185173	4.32089312243797	0.00563858906778028	0.495838918141235	-2.17516165628547
Q05209-1	PTPN12	-0.0858096625085296	3.42367876107908	-3.97047919168938	0.00821096806127229	0.567100317411475	-2.17814180368938
O43791	SPOP	0.161398446095796	3.30055300327326	3.90416587858473	0.00883461187864022	0.567100317411475	-2.19770973398941
P62266	RPS23	-0.231778429444492	3.34559384229234	-3.88522207944402	0.00902242942735606	0.567100317411475	-2.20658575079262
Q16649	NFIL3	0.192477367589291	3.20269916772676	4.00821038673215	0.00787833603224789	0.567100317411475	-2.20912639264024
Q86YC2	PALB2	0.130508608934788	3.3485512427966	3.83688796895683	0.00952230266147162	0.567100317411475	-2.21080641000143
Q9UHI8	ADAMTS1	0.325482039844335	3.21191749754757	4.31266017434557	0.00568741199119248	0.495838918141235	-2.21220222173641
P30414	NKTR	0.0991736992059628	3.28868481456181	3.91641399885669	0.00871551968280369	0.567100317411475	-2.21598755058077
Q5H9R7-5	PPP6R3	-0.0479248458987273	3.34753640911315	-4.26305933240495	0.00599188841814318	0.497775792586512	-2.22871727244069
P62253	UBE2G1	-0.0837776978364559	3.3362810721872	-3.89992408852326	0.00887628188599494	0.567100317411475	-2.23266318652032
P58546	LUZP6; MTPN	-0.155926004136261	2.90534847076444	-3.81287088444947	0.00978220210481698	0.567100317411475	-2.23351100421714
O95376	ARIH2	-0.127280243066279	3.27878020868427	-3.8148380087968	0.00976061823308963	0.567100317411475	-2.24364215300397
P29375-1	KDM5A	0.0945223141809896	3.26597368575112	3.89910091453584	0.00888439406832746	0.567100317411475	-2.24693152566289
Q96LT9	RNPC3	0.0975063674130276	3.31601307618225	3.8101326598226	0.00981233595119104	0.567100317411475	-2.26183882425081
Q99584	S100A13	-0.175578318701382	3.29041377437535	-3.76837598114303	0.0102850097435163	0.567100317411475	-2.2930128084363
Q92993-3	KAT5	0.107179290464704	3.35571798298926	3.76015476362487	0.0103810501665055	0.567100317411475	-2.29482973230219
P14902	IDO1	-0.112761230998592	3.43290275461332	-3.76408870882085	0.0103349688744739	0.567100317411475	-2.29589829292081
Q02487	DSC2	0.178450886855377	3.41096998207374	3.78783224779909	0.0100616648810277	0.567100317411475	-2.31330527908062
O00154	ACOT7	-0.0811713590966847	3.3436020676452	-3.91252094924064	0.00875317611599455	0.567100317411475	-2.3171975542601
O43447	PPIH	-0.108727269882895	3.29842475953582	-3.87645475432585	0.00911086894688286	0.567100317411475	-2.32070266318173
Q14108-1	SCARB2	0.121200566963573	2.90558143941484	3.74175760676976	0.0105996292303539	0.567100317411475	-2.32401250458787
P17987	TCP1	-0.0529007032481046	3.31465749509795	-4.40153277366878	0.00518468995778654	0.479240257302871	-2.32407761377678
Q8TF72	SHROOM3	0.0743727786792872	3.40136954600473	3.91379838164021	0.00874079971726355	0.567100317411475	-2.33999162769025
P40925-3	MDH1	-0.0921651875847888	3.29466016152323	-3.98056513558152	0.00812052858866815	0.567100317411475	-2.34030475002708
Q9HCM1	KIAA1551	0.0895540534917044	3.40457013353542	3.8306576933928	0.00958897053082577	0.567100317411475	-2.34596408517618
Q96KG7-1	MEGF10	0.146943440826516	3.3888278857575	3.69989695275771	0.0111164575117774	0.567100317411475	-2.35167139365381
P15498-1	VAV1	0.17278263083981	2.43236532699921	3.69345937047234	0.0111984141767158	0.567100317411475	-2.35401532259781
Q9UBF2	COPG2	-0.0542197813880609	3.38586478234028	-3.98077915512765	0.00811862169418448	0.567100317411475	-2.40040975927826
P49189	ALDH9A1	-0.084984361094318	3.27364072191751	-3.87347777389589	0.0091411202013425	0.567100317411475	-2.41781509198165
Q6PL18-1	ATAD2	0.137808264647254	3.15087761760196	3.83273884407856	0.00956664279114054	0.567100317411475	-2.42626190289593
P04198	MYCN	-0.208210984551516	3.33424789830524	-3.70671396095401	0.0110304015240828	0.567100317411475	-2.43669965292497
Q92574-1	TSC1	0.077613192471412	3.3047017008469	3.69055863674008	0.0112355641614369	0.567100317411475	-2.43916686585489
P29762	CRABP1	-0.156933090553571	3.42929371949225	-3.73059110406052	0.010734812740095	0.567100317411475	-2.45580528509816
Q9Y467	SALL2	-0.11943413827519	3.43204863636509	-3.76723817647568	0.0102982420168687	0.567100317411475	-2.47446437067004
P58340-1	MLF1	0.181467494376192	3.3464462446115	3.65999618961579	0.0116354740292734	0.577799776907283	-2.47951432049164
Q9GZN8-2	C20orf27	-0.0846492306575094	3.32571969685439	-3.62138756584901	0.0121636047216521	0.586266771808686	-2.48734668298038
P49959-3	MRE11A; MRE11	0.0599947180144001	3.20866810193323	3.81608129324264	0.00974700411600987	0.567100317411475	-2.4917551964849
O60907	TBL1X	0.140381419512531	3.21139959330747	3.54877967422919	0.0132309222640125	0.597103738879437	-2.50269627661263
O60869-1	EDF1	-0.0827237407458775	3.34897179278424	-3.64473789667971	0.0118410681551686	0.581382630753625	-2.50319980737885
O95347-1	SMC2	-0.0837343488640955	3.30333391953906	-4.0930832711346	0.00718418621165426	0.567100317411475	-2.51383141925884
Q8IX03-2	WWC1	-0.143618769705128	3.32607656476531	-3.56129815165615	0.0130396772108205	0.595044787237323	-2.52155331898613
Q9H0C8	ILKAP	-0.108642002635655	3.2725399861848	-3.53545830084138	0.0134378749086643	0.599874177235736	-2.53835940529245
P41250	GARS	-0.0729623370200255	3.31205621336978	-3.88329942530665	0.00904174109907091	0.567100317411475	-2.54095279830141
Q9UPT5	EXOC7	-0.0726035423827804	3.32371905098118	-3.73320202670648	0.0107030323308412	0.567100317411475	-2.54428785442864
Q8TED0	UTP15	0.0585165933415575	3.37198767243256	3.73224576386607	0.0107146598090877	0.567100317411475	-2.55750715195196
Q13127-1	REST	0.10727046710089	3.36762120373768	3.52336158953169	0.0136289313802299	0.599874177235736	-2.5627367790637
Q13303-3	KCNAB2	0.256851241664364	1.84063864008368	3.58240425562424	0.0127241806132638	0.588071769066026	-2.5740182154045
Q96L58	B3GALT6	0.156193883094021	3.27059609032666	3.46849432602125	0.0145343464909253	0.602472590784656	-2.58160049984111
Q13610	PWP1	0.0986431443085773	3.37905463666812	3.64060674575568	0.0118974287054639	0.581382630753625	-2.58813797537333
Q8NDZ4	C3orf58	0.151308170318522	3.33151556836501	3.46224567714899	0.0146416390854445	0.602472590784656	-2.59343391155642
Q8IZT6-1	ASPM	0.0497121509361171	3.39511359922529	3.81546278236833	0.00975377422003783	0.567100317411475	-2.59807896747828
Q15287-1	RNPS1	0.0846318063779769	3.31891321535627	3.55681968565995	0.0131077384049932	0.595044787237323	-2.60301087001303
P21399	ACO1	-0.0848599083431967	3.26816113628361	-3.72340320558532	0.0108228519765567	0.567100317411475	-2.60716799560695
Q9NSB8	HOMER2	0.112758693776662	3.29364376802289	3.44179513766326	0.0149989917674491	0.602472590784656	-2.61169572016574
O60826	CCDC22	0.121874917667742	2.92922363261548	3.49235241335492	0.0141326628900455	0.599874177235736	-2.61269583952945
Q9ULM3	YEATS2	0.0694507771743171	3.31226968475914	3.72928403457483	0.0107507622138594	0.567100317411475	-2.61466261694396
P42166	TMPO	0.0886790460562979	3.28562268307155	3.74741075237357	0.0105319193261101	0.567100317411475	-2.62131304730406
Q07352	ZFP36L1	-0.173089838244129	3.39425508162388	-3.47227839651794	0.014469797359466	0.602472590784656	-2.62212300959634
Q92794	KAT6A	0.105957203168868	3.19426729278947	3.43433343251658	0.0151317832982604	0.604640840959656	-2.6320095931987
P62318	SNRPD3	0.0952623151566366	3.34484297527358	3.52381174746177	0.0136217675610871	0.599874177235736	-2.63467796226137
Q16854	DGUOK	-0.238521281681423	3.26841733684805	-3.4562601494125	0.0147452404084268	0.602472590784656	-2.63528945526163
Q96D46	NMD3	-0.0727543472331257	3.31347072077694	-3.60081803859006	0.0124558764083441	0.586266771808686	-2.65485860188909
Q15170-2	TCEAL1	-0.16488676030441	2.94271415926941	-3.41772375155921	0.015432092067146	0.610427398293799	-2.69234901794966
Q9Y6E2	BZW2	-0.0840154632466463	3.32584310676181	-3.49116247908572	0.0141524017309265	0.599874177235736	-2.69803085495821
Q9BYD2	MRPL9	-0.142061628901615	3.31133218288102	-3.37293575933094	0.0162753882753495	0.624323894242405	-2.70820167381731
Q9Y6X4-1	FAM169A	0.0695725932001533	3.36880127661851	3.50563504502327	0.0139143965351293	0.599874177235736	-2.72957031207434
Q92997	DVL3	-0.150032950037456	3.36433131341936	-3.34068399539429	0.0169143002059737	0.629934520292379	-2.73415248981399
Q5VWN6-1	FAM208B	0.0498237847521911	3.34662469754195	3.6652211001785	0.0115659921006913	0.577799776907283	-2.74071796153866
P08670	VIM	0.244236152324052	2.46576687862741	3.82593418767511	0.00963986434012366	0.567100317411475	-2.74139952907473
P54198	HIRA	0.0560142354039377	3.35168765205626	3.60647818386435	0.012374677020508	0.586266771808686	-2.74524762911595
Q15678	PTPN14	0.074564141112245	3.41539716940691	3.50543789995073	0.0139176085436647	0.599874177235736	-2.7537901251515
Q96EY4	TMA16	-0.184807636294869	3.30233358382117	-3.34157462578644	0.0168962878435072	0.629934520292379	-2.75619605001084
Q9HCE6	ARHGEF10L	-0.156587108277577	3.43122687646047	-3.29876767287706	0.01778657260278	0.630961708693689	-2.76269606710566
Q9BUQ8	DDX23	0.0643642195972806	3.30614160729456	3.82196854430706	0.00968282673621024	0.567100317411475	-2.76444466890113
Q14693-7	LPIN1	0.195362628411232	2.73861434779103	3.44464266664205	0.0149486578845115	0.602472590784656	-2.76549109812817
P08237-3	PFKM	-0.0737939891330857	3.3065122202461	-3.6945316269157	0.0111847164980033	0.567100317411475	-2.78552580405059
P27348	YWHAQ	-0.0742832178755412	3.34927172020419	-3.6069144742377	0.0123684426587065	0.586266771808686	-2.79532792715978
P49588	AARS	-0.0475613696043312	3.28769642433886	-3.93619463040626	0.00852698033667368	0.567100317411475	-2.79827172184923
O43615	TIMM44	-0.0953337658787477	3.31508781397203	-3.60577948026037	0.0123846684415922	0.586266771808686	-2.79862663794295
Q8N954-1	CCDC75; GPATCH11	0.167339418842603	3.01217300942526	3.26004479167741	0.0186367992401857	0.630961708693689	-2.80172839643606
P23508-1	MCC	0.0982522270423454	3.2086315997562	3.29470639561451	0.0178736989761512	0.630961708693689	-2.80200233803962
Q8WTT2	NOC3L	0.0915151725839349	3.30549628667899	3.49574122772194	0.0140766163586961	0.599874177235736	-2.80577253636685
Q16204	CCDC6	-0.0961213353780879	3.38857168164021	-3.55867595940368	0.0130794798460558	0.595044787237323	-2.81062821828024
Q96T23	RSF1	0.0588183923410435	3.35839679817499	3.82674907232267	0.00963106269294993	0.567100317411475	-2.82359542158162
P27694	RPA1	-0.0965673050357791	3.31471677290257	-3.70698408412708	0.0110270069593684	0.567100317411475	-2.82529432439895
P56211	ARPP19	-0.133351332771344	3.34522712937787	-3.22919559555474	0.0193463301658523	0.630961708693689	-2.83272900179037
Q5H9R4-1	ARMCX4	0.152820727921829	3.39848075376058	3.27279905102395	0.0183518938202741	0.630961708693689	-2.84670276979166
O75818-1	RPP40	0.0772580456090229	3.28895407762884	3.35353568026487	0.0166564327054958	0.629498284318049	-2.84848030768091
Q9BYP7-2	WNK3	-0.0841484548909229	3.40055056586598	-3.40534550456239	0.0156602010873093	0.615221648506331	-2.85938694467043
Q9NZI8	IGF2BP1	0.0507380206751101	3.38198625198117	3.93461010016093	0.00854191303031644	0.567100317411475	-2.8635320540228
O95340-2	PAPSS2	-0.0718068201322063	3.35854719912016	-3.38427279222063	0.0160571953851303	0.619049261279997	-2.86842316817266
Q9BRA2	TXNDC17	-0.163559946761312	3.3353625598883	-3.18813855983074	0.0203373102233615	0.630961708693689	-2.87155659705975
Q9BUJ2-1	HNRNPUL1	0.0503900195144565	3.30827355306164	3.70396738779017	0.0110649834649421	0.567100317411475	-2.87287412026459
Q9H336	CRISPLD1	0.126532323387526	3.39783849261283	3.20241687200342	0.0199864675150978	0.630961708693689	-2.88502570491879
Q9BW91-1	NUDT9	-0.0810107854134111	3.35658988313264	-3.32194508920928	0.0172982574251763	0.630961708693689	-2.88566621581839
P29373	CRABP2	-0.149560336619518	3.28037509886787	-3.16571232001596	0.0209021460166831	0.630961708693689	-2.89313686840804
Q99959-2	PKP2	0.0738728444561958	3.27439841375934	3.41752478741535	0.0154357293103489	0.610427398293799	-2.89980667071874
Q9HD42-1	CHMP1A	-0.11902370545756	3.28657584931879	-3.23671644344754	0.0191706413332642	0.630961708693689	-2.90085316601144
Q96MN5	TCEANC2	-0.15871487377945	3.31588713742078	-3.19500589888468	0.0201677274982241	0.630961708693689	-2.90090934161124
Q14563	SEMA3A	0.183737732543542	3.40183360102353	3.19889094444368	0.0200724807594462	0.630961708693689	-2.90847973259581
Q9GZZ1-1	NAA50	-0.102779681040175	3.3140257606	-3.52336006399037	0.0136289556648501	0.599874177235736	-2.91356637326535
Q9UPQ7-1	PDZRN3	0.141179818122326	3.38690154348677	3.17551720689487	0.0206530973311582	0.630961708693689	-2.91614679774841
Q7Z7F7-2	MRPL55	-0.328302873961739	3.27868504170523	-3.13994675477587	0.0215725120000677	0.634116138178237	-2.91984817174066
O75934	BCAS2	0.0859985012375277	3.29469446729512	3.38655328563445	0.0160136981681862	0.619049261279997	-2.92222612527169
P23193	TCEA1	-0.0962423932311925	3.33445043538506	-3.44180757448411	0.0149987715207985	0.602472590784656	-2.92612622781178
Q93009	USP7	-0.0408937857110549	3.27953568805458	-3.80082711032778	0.00991552365574374	0.567100317411475	-2.92703524264243
Q96J01	THOC3	0.0793712935580736	3.26921596605531	3.34182169342649	0.0168912948441722	0.629934520292379	-2.9349050079031
Q9H2P9-5	DPH5	-0.107623646662106	3.35443476595629	-3.19135859205521	0.0202575994843563	0.630961708693689	-2.93548712859548
O15318	POLR3G	-0.110408065405126	3.44037277870266	-3.14906872529723	0.0213325086177146	0.634116138178237	-2.93918233909672
Q9ULD4	BRPF3	0.0771612885079448	3.38038845859922	3.24315501916893	0.019021633817947	0.630961708693689	-2.93966207813189
Q8IXM2-3	C17orf49	0.139086220852545	3.26201124349569	3.11491831450134	0.0222464173165075	0.637392751382476	-2.94489946539641
Q9BUL8	PDCD10	-0.145152233272675	3.29485629632256	-3.23686237557403	0.0191672497928444	0.630961708693689	-2.94579579278329
Q7LDG7-2	RASGRP2	-0.123067325457606	3.421103503094	-3.10991847462659	0.0223837962709142	0.637392751382476	-2.95528230398444
Q9NWV4	C1orf123	-0.0946451575936416	3.3260745922951	-3.18262912128996	0.0204744974902921	0.630961708693689	-2.95847496486815
Q9UNH7-1	SNX6	-0.0876657531110637	3.2460983885393	-3.3327288223717	0.0170761350089481	0.630961708693689	-2.95886459125496
Q9P2P1	NYNRIN	-0.0866136592603845	3.43329992216225	-3.20541693161627	0.0199136025918407	0.630961708693689	-2.96069964386952
Q96DA6	DNAJC19	-0.147150378103195	3.3227432787683	-3.14198398102968	0.0215186550010622	0.634116138178237	-2.97699646105639
Q10472	GALNT1	0.111187403035314	3.37089199889567	3.19141115336441	0.0202563012083393	0.630961708693689	-2.97721348118458
Q14914	PTGR1	-0.08403965990692	3.43074968871253	-3.21573722282392	0.0196651743090894	0.630961708693689	-2.9862200013143
Q4VC31	CCDC58	0.0799421871711716	3.36336492874597	3.16241187187909	0.0209867216745039	0.630961708693689	-2.99025777522793
P41091	EIF2S3	-0.0837283671514162	3.30851352022511	-3.49495049551695	0.0140896718620922	0.599874177235736	-3.00470145111767
Q6P1L8	MRPL14	-0.152113538202348	3.31942972707624	-3.06473466251658	0.0236684414292381	0.638197663657005	-3.01071304551695
Q16822-1	PCK2	-0.102073244408848	3.32375567468816	-3.23106184548412	0.0193025688845151	0.630961708693689	-3.0194670760504
Q92905	COPS5	-0.0875232105136336	3.31593302597985	-3.36024934818603	0.0165234589331761	0.629498284318049	-3.02068144972796
Q13451-1	FKBP5	-0.0717507672932337	3.28710335873121	-3.39250204046474	0.015900848166276	0.619049261279997	-3.02087557501346
Q5SW96	LDLRAP1	-0.138222580618275	3.29322890330164	-3.03581441450242	0.0245330471911624	0.645546381268326	-3.03101507186274
Q3MHD2-2	LSM12	0.149021362478924	3.32215137159722	3.06086880749738	0.0237820562716955	0.638197663657005	-3.0317168333616
P31937	HIBADH	-0.115708305802687	3.27789711411555	-3.07609775011366	0.0233379219484574	0.638197663657005	-3.03567270582147
Q8N8A2	ANKRD44	0.151850153588285	2.52122213156585	3.04893446606334	0.0241365893391208	0.642403430531149	-3.03676447737895
P56192	MARS	-0.0681828725714125	3.32357603197859	-3.4988743971991	0.0140250179412624	0.599874177235736	-3.04227181760285
Q6ZYL4	GTF2H5	-0.241709715673297	3.22332375923539	-3.0198107891357	0.0250263304489657	0.648655429744814	-3.05117547360799
P01130	LDLR	0.0830701064911813	3.4259683024982	3.08758411460288	0.0230089585831979	0.638197663657005	-3.06458386325131
O75386-2	TULP3	0.194720517527347	3.31327662590959	3.0222716177142	0.0249497779851589	0.648655429744814	-3.06578071214283
Q8IXM3	MRPL41	-0.197250107588546	3.31469609986847	-2.99008432060787	0.0259716708549737	0.653293963276585	-3.07496523057318
Q9ULP9	TBC1D24	-0.0903576822866317	3.20572343111062	-3.03700031551348	0.0244969201587264	0.645546381268326	-3.07667472022928
Q14978-2	NOLC1	0.0488626579444195	3.35005039054649	3.74203966080921	0.0105962394225984	0.567100317411475	-3.07818559131207
Q8TEH3	DENND1A	-0.084899813963269	3.34028848382613	-3.08294348990112	0.0231412466383229	0.638197663657005	-3.08167298248515
Q9H4A4	RNPEP	-0.0594572260950885	3.18975049648398	-3.3230284357073	0.0172757987803368	0.630961708693689	-3.08332585277142
Q6YHK3-1	CD109	0.0971956168901607	3.36181173588757	2.98681329913697	0.0260780570230594	0.653813090489232	-3.09653054188639
Q14012	CAMK1	0.218371981050397	2.741254643531	3.1070960665371	0.022461758232453	0.637392751382476	-3.09757489355577
Q3B726	TWISTNB	0.0893886171295478	3.33643137406415	3.15979733024422	0.0210539881941586	0.630961708693689	-3.09800267877201
Q8TBC4-1	UBA3	-0.0730235073978675	3.26977279712622	-3.11966295888302	0.0221169070368235	0.637392751382476	-3.11072743490798
O75521	ECI2	-0.0775934679371722	3.34064268174388	-3.23155160157114	0.0192911028134676	0.630961708693689	-3.11593556890687
P18583-5	SON	0.0586103998053693	3.36390803442961	3.27477426786013	0.0183082034479804	0.630961708693689	-3.13563922800883
Q9H0V1	TMEM168	0.177842404988231	2.98647736695558	3.00737955908475	0.0254169983080009	0.649997370063276	-3.13577762184148
Q9P0V3-1	SH3BP4	0.0674980566755853	3.39679504231465	3.15629811549148	0.021144387248304	0.631205209996065	-3.14341538935405
Q9UPN6-2	SCAF8	0.0548529896208322	3.34555296059439	3.23199366711914	0.0192807597206558	0.630961708693689	-3.14970597782714
Q9Y4A5	TRRAP	0.0512520243347845	3.33722330862286	3.73099805984379	0.0107298522873057	0.567100317411475	-3.1500967363367
Q9Y291	MRPS33	-0.212295112665881	3.31997873228026	-2.91211030859538	0.0286420418706041	0.659251084934869	-3.15483026449978
P05783	KRT18	-0.0758882575109897	3.41964491864975	-3.60227263912295	0.0124349523293631	0.586266771808686	-3.15572042130972
Q9Y5X3	SNX5	-0.0630850714547709	3.28193177308289	-3.25398909610493	0.0187737804759517	0.630961708693689	-3.15677352712796
Q15120-2	PDK3	-0.119057163928729	3.33402801272686	-3.07342459491255	0.023415218140965	0.638197663657005	-3.15777233242658
Q149N8	SHPRH	0.0537758953322178	3.29543759781658	3.24455533124057	0.0189893961255019	0.630961708693689	-3.15959593609735
Q8IUC4	RHPN2	-0.0902500992813261	3.42394643612605	-3.06177812941508	0.0237552782048627	0.638197663657005	-3.17324514025066
Q86XK3-2	SFR1	0.200349716047502	3.32359093629396	2.89953152161822	0.0291002275984227	0.659251084934869	-3.18397057041493
P62888	RPL30	0.149442997452326	3.39361018608111	3.27102354322859	0.0183912651707562	0.630961708693689	-3.19166487114693
O95671-1	ASMTL	-0.149399709970317	3.39309747588258	-3.0812260834779	0.0231904154559083	0.638197663657005	-3.19168716196212
Q3T906	GNPTAB	0.0986327754493998	3.38416448345257	2.89325407487029	0.0293318672511775	0.659251084934869	-3.1944131865326
O15287	FANCG	0.105627240336306	3.25374646249264	2.89807437941156	0.0291538184387017	0.659251084934869	-3.19548378456831
O60293	ZFC3H1	0.0903931966063669	3.31056533744523	3.17884611925678	0.0205692863067926	0.630961708693689	-3.19663080901143
Q13889	GTF2H3	0.137315428988521	3.34011579082295	2.87588327012624	0.029983385611158	0.660045901302808	-3.21535825146323
P55263-1	ADK	-0.055563550024278	3.12365327102678	-3.14449573459244	0.0214524567769095	0.634116138178237	-3.21908252959632
Q5T7P8	SYT6	-0.11429303758044	3.38715329386194	-2.92575709227283	0.0281538305082486	0.659251084934869	-3.2199349978485
A6NDG6	PGP	-0.0819979199611764	3.27335892592582	-3.03185961234095	0.0246539480854561	0.645546381268326	-3.23190024251044
Q8N141	ZFP82	0.137343766218116	3.43057294230092	2.84771449198571	0.0310736140503823	0.660045901302808	-3.2389077013427
Q9H8K7	C10orf88	0.108434814998184	3.27962314900922	2.82962304485475	0.0317964949960568	0.660045901302808	-3.24106396080246
Q5JPI3	C3orf38	0.0886443958841713	3.35990881201797	2.90934180494535	0.0287422064336608	0.659251084934869	-3.24166449292179
Q86SF2	GALNT7	0.135939373179272	3.41761675575068	3.17682142328384	0.0206202167166841	0.630961708693689	-3.24799447106726
Q9Y2D8	SSX2IP	0.196870622915183	3.32728878396523	2.83899272461329	0.0314198561938798	0.660045901302808	-3.25505361677866
Q96LB3-1	IFT74	0.0825518783106926	3.29767684628558	3.05774896300195	0.0238741826733004	0.638197663657005	-3.25861450333939
Q9NS73	MBIP	0.119011213978099	3.34815716259193	2.91319004292051	0.0286030802303304	0.659251084934869	-3.25906315777121
Q15361	TTF1	0.0666332431961475	3.38584791323998	3.11310219041097	0.0222962108782246	0.637392751382476	-3.26467454286828
P35080-2	PFN2	-0.10548239982161	3.32026820118642	-2.84241518756182	0.0312834919599556	0.660045901302808	-3.26590739488822
O15550	KDM6A	0.0716255433187686	3.33295590331818	2.96976618943133	0.0266402629273834	0.658029114205621	-3.27357526473443
Q92600-2	RQCD1; CNOT9	-0.0769457577982871	3.3554911794103	-2.90631568151963	0.0288521286013419	0.659251084934869	-3.27669464627058
Q07955-1	SRSF1	0.130783402397312	3.33907430335803	3.29378199722011	0.0178935959569525	0.630961708693689	-3.27846433041713
Q01850	CDR2; LOC101060399	0.120664344001299	3.2897980956326	2.79684489824343	0.0331531490989852	0.665840209129357	-3.27881501285312
Q13952-1	NFYC	-0.0766630906444857	3.34954773458702	-2.93326485488778	0.0278891172887341	0.659251084934869	-3.28159747089235
Q8IXT5	RBM12B	0.107069191540972	3.32504522393069	3.0645741578256	0.0236731466857608	0.638197663657005	-3.28225453761552
P42126	ECI1	-0.128729487872881	3.11130903831623	-2.9454948099395	0.0274637029667334	0.659251084934869	-3.28274547836697
Q92878-2	RAD50	0.051475976287313	3.28230227169906	3.40227615520225	0.0157173413851982	0.615221648506331	-3.28738973567649
Q9GZV8	PRDM14	-0.0997787556470014	3.44358258129189	-2.97494845040711	0.026467965207188	0.658029114205621	-3.29766296932924
Q8NAV1-1	PRPF38A	-0.0883631815611136	3.32645089204948	-2.86003857632152	0.0305914150477059	0.660045901302808	-3.29936340127623
P41236	PPP1R2	-0.0976178464783886	3.23509461389333	-2.84946602119107	0.0310045819182765	0.660045901302808	-3.30025922067667
Q9H8M2-5	BRD9	0.056813266146421	3.16348521624901	3.04685409000128	0.0241989821980581	0.642403430531149	-3.30118497337355
P36405	ARL3	-0.0821011088705766	3.24408028258268	-2.87673738415298	0.0299509851557545	0.660045901302808	-3.30892036962856
P51587	BRCA2	0.0665974818817728	3.37694364195723	3.30953378239336	0.0175578736959849	0.630961708693689	-3.30932667972554
Q9H7H0-3	METTL17	-0.160674685983854	3.34046927198322	-2.76580658424235	0.0344957905143398	0.66660007029301	-3.31024266227094
P30825	SLC7A1	0.140432238673156	3.3489620802313	2.77381239486243	0.0341439337171504	0.66660007029301	-3.31349640748695
Q99457	NAP1L3	0.105617282840059	3.42056248578935	2.85950780339346	0.030612013890512	0.660045901302808	-3.31505674912054
Q9Y620-1	RAD54B	0.0706184805567473	3.3657932224873	3.00900529351078	0.0253655300409622	0.649997370063276	-3.32105637344665
Q8WZ74	CTTNBP2	0.124085985807861	3.40760575741771	2.99261960623742	0.0258895401914563	0.653293963276585	-3.32410112525145
Q9Y2J4-4	AMOTL2	-0.104711027626645	3.3683124822282	-2.8548111052904	0.03079494727526	0.660045901302808	-3.32639101915052
Q8TD26	CHD6	0.0763263716984128	3.35401166468525	2.89174403680076	0.0293878872585669	0.659251084934869	-3.32864861977603
O60934	NBN	0.0494600312759111	3.31657274678255	3.11133320220071	0.0223448299044499	0.637392751382476	-3.33716417842077
Q9Y520-4	PRRC2C	-0.035698558772174	3.38109584087077	-3.65715269138258	0.0116734835011247	0.577799776907283	-3.33977899747568
O60318	MCM3AP	0.0610930371345043	3.34221625026967	3.16433215969389	0.0209374675708329	0.630961708693689	-3.34025555292423
Q5T6C5	ATXN7L2	-0.21377844787303	3.3625362931873	-2.79151748952335	0.0333795155988394	0.66660007029301	-3.34649925916469
Q7L945	ZNF627	0.145064685521159	3.38748947108351	2.72843525157105	0.0361909681249726	0.66660007029301	-3.34729354153558
Q96G01	BICD1	0.084750133519589	3.3653177822088	2.83442037081601	0.0316030450413999	0.660045901302808	-3.34995996598131
Q9Y6P5-2	SESN1	0.115169167369052	2.91338370835199	2.71887114661461	0.036639122547608	0.66660007029301	-3.35335501697236
Q9BVI0	PHF20	0.0773896613208886	3.37036880710836	2.87609452719781	0.029975368114413	0.660045901302808	-3.35400646593412
Q9H9B1	EHMT1	0.0445952721243511	3.41107710343913	3.25983434807761	0.0186415409562527	0.630961708693689	-3.3542870685367
Q4G0S7	CCDC152	0.138997982238147	3.39804907397719	2.71448710152224	0.0368465494694439	0.66660007029301	-3.35733740046068
Q06455-3	RUNX1T1	0.123464572818839	3.38608569697633	2.7122498226759	0.0369528923533674	0.66660007029301	-3.36071092732284
Q8TDN4	CABLES1	0.163470934885511	3.23202200493259	2.72619481024996	0.0362954171003856	0.66660007029301	-3.36293670466515
P37840-1	SNCA	0.119002761523615	3.11628289417034	2.7087857062612	0.0371182035732648	0.66660007029301	-3.36381938407391
P48426	PIP4K2A	0.105789995143095	3.29170064181708	2.76161184383224	0.0346817153071824	0.66660007029301	-3.36711287198893
P09622	DLD	-0.0625115338827602	3.26733555352535	-3.23677300952442	0.0191693266288352	0.630961708693689	-3.36829920587009
Q9NP61-1	ARFGAP3	-0.0769470404159559	3.1487402834298	-2.82456394780254	0.0320018945379374	0.66177502667131	-3.37227153159411
Q16514	TAF12	0.118655681952089	3.27772863856888	2.70176723275815	0.0374555834817546	0.66660007029301	-3.37421166558514
P01023	A2M	0.247837153713337	2.04070306974234	2.83541825062714	0.0315629667985126	0.660045901302808	-3.37543684770866
Q8WZA1-2	POMGNT1	0.134229708739215	3.31842108077482	2.68465300943804	0.0382922119655622	0.66660007029301	-3.38930541738826
P38398-7	BRCA1	0.0515469510486139	3.2950866467057	3.03205094801302	0.0246480838229201	0.645546381268326	-3.3923292864874
P82673-1	MRPS35	-0.166253150237821	3.31879578662965	-2.80137247368966	0.0329620760889006	0.663924515805512	-3.39430846525421
Q9Y295	DRG1	-0.052998536979921	3.35445319193409	-3.01291062872464	0.0252423587087767	0.64986367789844	-3.39508362119127
Q92616	GCN1L1; GCN1	-0.0317231088368828	3.34579360478638	-3.58242504071993	0.0127238741433337	0.588071769066026	-3.39525018330909
Q5BKZ1	ZNF326	0.0766201128253756	3.35324266868628	2.94443409678643	0.0275003175102383	0.659251084934869	-3.39640947312842
Q16563-2	SYPL1	0.149513388254777	3.16648038611435	2.67369083822331	0.0388386641581042	0.66660007029301	-3.39861687924117
P13995	MTHFD2	-0.144325423792696	3.30899350783674	-2.98421968467374	0.0261627501016937	0.653813090489232	-3.40191466767782
O95602	POLR1A	0.0448075986613872	3.35686025453254	3.44382372221962	0.0149631145603215	0.602472590784656	-3.4023662568252
Q14168-4	MPP2	0.0726218136136801	3.29323392259559	2.81838018488961	0.0322549138707434	0.662735024681651	-3.4035508145146
P82094	TMF1	0.0443945033563226	3.28212405631679	3.10577912494887	0.0224982375205656	0.637392751382476	-3.40484573528181
P23246-1	SFPQ	0.0706881002441124	3.33209417085815	3.58340618020981	0.0127094169070114	0.588071769066026	-3.41125205976627
Q8NBN3-1	TMEM87A	0.103740920774235	3.38517713734371	2.86284309890486	0.0304828238606065	0.660045901302808	-3.41239553971927
Q9BQG0-2	MYBBP1A	0.0803044177871052	3.39436260176659	3.47089882836948	0.0144932931851981	0.602472590784656	-3.41510966630362
Q14692	BMS1	0.0642850542086814	3.38274810611799	3.17084597191833	0.0207713387417829	0.630961708693689	-3.42109364458344
O15160	POLR1C	0.0700974859481487	3.32337432734712	2.85761121440577	0.0306857422038284	0.660045901302808	-3.42122866370739
Q8NFW8	CMAS	-0.0612352396957976	3.31180314329093	-3.02120375698547	0.0249829658898397	0.648655429744814	-3.42832111941216
O00219	HAS3	-0.195940103843404	3.44541740544871	-2.7134830158464	0.0368942350053012	0.66660007029301	-3.43667260142513
Q6P4F7	ARHGAP11A	0.0880674837814463	3.37343801287268	2.79064111708042	0.0334169136529048	0.66660007029301	-3.43672790565245
Q9Y5J6	FXC1; TIMM10B	0.158291732973519	3.27952143912241	2.64313785035524	0.0404064852276556	0.672312518714107	-3.43677361371274
O00560-1	SDCBP	0.0943602502708278	3.31889195257025	2.80115503033539	0.032971225302646	0.663924515805512	-3.43978127142662
Q9P2I0	CPSF2	0.0497326655407282	3.35416987185017	3.21371288455532	0.0197136329782684	0.630961708693689	-3.44145978855989
Q9UKG1	APPL1	-0.0745558026055197	3.26444092939717	-2.93668213014737	0.0277695292731181	0.659251084934869	-3.44199996479551
Q8TCG2	PI4K2B	0.0876247685970299	3.2585113818221	2.70854838800127	0.0371295578162053	0.66660007029301	-3.44523513446477
Q96MG7	NDNL2; NSMCE3	0.102191362697128	3.27774753599352	2.71777704083962	0.0366907708178067	0.66660007029301	-3.44778986367884
Q15019-2	SEPT2	-0.0734464653284061	3.31610684469999	-3.09603841268075	0.022770085556785	0.637562395589979	-3.44999778917781
P52732	KIF11	-0.0615250224953277	3.33162824980759	-3.21898520723027	0.0195876983657779	0.630961708693689	-3.45234366252573
P07197	NEFM	0.169992509469144	2.34574323175542	2.94810790191742	0.0273737290188561	0.659251084934869	-3.45362129339371
P30049	ATP5D	-0.223037994829953	3.27114101785893	-2.63584494036723	0.040790695519874	0.672312518714107	-3.45827530733266
Q7Z478	DHX29	-0.0690293089485175	3.3742644615281	-3.21999490743149	0.0195636821173155	0.630961708693689	-3.4622566485138
Q16718	NDUFA5	-0.137194901515981	3.26928306484359	-2.74466817826255	0.0354438230029026	0.66660007029301	-3.46495128225467
P29466-1	CASP1	0.175743655656285	2.48150803873507	2.60647232243751	0.0423783202241227	0.681850912476299	-3.46689375239892
Q99543-1	DNAJC2	-0.0629659968882498	3.32509286523211	-2.95129695683302	0.0272643593171269	0.659251084934869	-3.46765905109833
Q96MW7	TIGD1	0.118733584943584	3.30303540467585	2.60039805967179	0.0427148430161457	0.68494400834668	-3.47678203696067
Q8WUX2	CHAC2	-0.0959818681655575	3.09782169807553	-2.63492806990181	0.0408392758781546	0.672312518714107	-3.47846522642343
Q9Y4C8	RBM19	0.0532780689320925	3.3810531614908	2.93389875135248	0.0278668916122883	0.659251084934869	-3.49007038827909
P35221	CTNNA1	-0.0526641751024146	3.3955519588825	-3.3083327662016	0.0175832242540284	0.630961708693689	-3.49250482340047
P62081	RPS7	-0.104336011771249	3.36039414252736	-2.81136464476502	0.0325445981318037	0.663924515805512	-3.49387587258024
Q7LFL8-1	CXXC5	-0.129285771046568	3.41759422584515	-2.58501402798558	0.0435800229340438	0.692118439302628	-3.49491943078983
Q53GS7-1	GLE1	0.0836196375243228	3.33845529687083	2.86292221784639	0.030479766459236	0.660045901302808	-3.49946097645498
P82933	MRPS9	-0.109913178260309	3.30892595810665	-2.83779742101096	0.0314676337675102	0.660045901302808	-3.50013810608389
Q7Z460-3	CLASP1	-0.0576792774900652	3.34280572446549	-3.20052546333438	0.0200325568326894	0.630961708693689	-3.50108625934872
Q9Y2L1-1	DIS3	0.0589252819942856	3.20966906870843	3.19488320447574	0.020170743611855	0.630961708693689	-3.50300987363615
Q12996-1	CSTF3	0.0728694940123493	3.33873869124656	3.05854734269051	0.023850569974445	0.638197663657005	-3.50406850420237
Q9H1B5	XYLT2	0.132935801923564	3.36511271257283	2.5687536066857	0.0445149347714818	0.693258820639974	-3.50568070454975
Q96AY2-2	EME1	0.085937529650556	3.12757572712275	2.6345500315538	0.0408593243273236	0.672312518714107	-3.50706701036856
Q9UMN6	KMT2B; MLL4	0.0577155222199929	3.3696897657747	2.97354370789085	0.0265145488699772	0.658029114205621	-3.50827036440513
Q86V25	VASH2	-0.20204810464589	3.44150829180463	-2.70638702963788	0.0372331383822808	0.66660007029301	-3.50902599230915
O96028-1	WHSC1; NSD2	0.0550690174725758	3.33743456243977	3.09921825339982	0.0226809464451793	0.637392751382476	-3.51017483222678
P27708	CAD	-0.0372875522137441	3.38287914181827	-3.44734908481206	0.0149009923166551	0.602472590784656	-3.5115508698949
P21964-1	COMT	-0.1105551131242	3.11793557468487	-2.67843326082558	0.0386012355750232	0.66660007029301	-3.51301188695923
Q9UNY4-1	TTF2	-0.0750913230311066	3.36595483907402	-3.06539919386354	0.023648971354153	0.638197663657005	-3.51727141241674
Q9UMS4	PRPF19	0.0849487594151139	3.28633504829287	3.17735205866458	0.0206068553740209	0.630961708693689	-3.51851839684337
O60858-3	TRIM13	0.282687176560594	3.36719279878566	2.78079791995668	0.0338400920774077	0.66660007029301	-3.52053970227323
Q969T7	NT5C3B; NT5C3L	0.380689960585899	2.89612754181973	2.54442737688843	0.0459538889812564	0.697893294958011	-3.52973317240032
Q8N6N7	ACBD7	-0.145023645113262	3.25494887648424	-2.5692675714736	0.0444850574109068	0.693258820639974	-3.53024482041326
P84157-1	MXRA7	-0.153953542019448	2.94168481029685	-2.54177413388248	0.0461138162350971	0.697893294958011	-3.53391901396857
O75695	RP2	0.177196391057394	3.23299613864727	2.53866736800448	0.0463018361748733	0.697893294958011	-3.53766106824181
Q9BS26	ERP44	0.0680944257323545	3.20460495913143	2.93279545787068	0.0279055877494732	0.659251084934869	-3.54066354234078
Q9BW27	NUP85	0.0844271426680716	3.34778097273546	2.92566294706488	0.0281571672876129	0.659251084934869	-3.54312827205962
Q9Y6Q9-1	NCOA3	0.117733326593633	3.25183581032807	2.70300327261635	0.0373959275394005	0.66660007029301	-3.54502100100152
Q8IUF8	MINA; RIOX2	0.0719286170305746	3.01844702318837	2.69525247687836	0.0377717108678922	0.66660007029301	-3.54937122745931
O43736-1	ITM2A	0.108151940805116	3.43830931775829	2.52694956758311	0.0470183923049058	0.701085908826398	-3.55235285871463
Q96MH2	HEXIM2	-0.139854474965386	3.28301998650956	-2.52276198730165	0.047277330640133	0.701085908826398	-3.55267475425844
Q13867	BLMH	-0.0919368150415122	3.2806074467478	-3.0133718260108	0.0252278561778595	0.64986367789844	-3.56017457546458
Q6NXT4-2	SLC30A6	0.116411564595955	3.34820196071977	2.51164466647032	0.0479721771996265	0.701085908826398	-3.56735467504833
P31146	CORO1A	0.259220205535571	2.11017828591274	2.71067527749656	0.0370279325800323	0.66660007029301	-3.56737596851756
Q7L1Q6-3	BZW1	-0.0658136509998017	3.36695559162484	-2.89525822527058	0.0292576960007662	0.659251084934869	-3.57359486682976
P62995	TRA2B	0.104070979083706	3.34247040624395	2.8433055618401	0.0312481214742127	0.660045901302808	-3.57915044794707
P51688	SGSH	0.137446084996276	3.18005572534106	2.50127480989682	0.0486301273732258	0.702618337490374	-3.58039323373207
Q96N46	TTC14	0.0995410008346366	3.33695538438015	2.56813120508564	0.0445511444385813	0.693258820639974	-3.58333530356826
P49591	SARS	-0.0630800821751019	3.22223840634597	-2.92494435683392	0.0281826504262795	0.659251084934869	-3.58336575358658
Q8IVL1-1	NAV2	-0.0505681561163995	3.43152256755078	-2.88617724184231	0.0295954151355846	0.660045901302808	-3.58574261349545
O00571	DDX3X	0.0294634852626486	3.31456037765752	3.25153827450023	0.01882953455038	0.630961708693689	-3.5862801365075
P26640	VARS; VARS2	-0.0581903942426231	3.23653418666166	-3.19527427105032	0.0201611320202041	0.630961708693689	-3.58838174779789
P59768	GNG2	-0.251768456467769	3.36560182768354	-2.58180331036195	0.0437629473471519	0.692266664015153	-3.59028505075192
Q8TBA6	GOLGA5	0.101652209634004	3.3509073330448	2.88090575353009	0.0297934056296186	0.660045901302808	-3.59127661705132
Q9NQ55-3	PPAN-P2RY11; PPAN	0.0867027507616342	3.38521701637501	2.69067209039779	0.0379956951365348	0.66660007029301	-3.59374048776033
P78364	PHC1	0.063758227759531	3.41103265944446	2.84126170143537	0.0313293793655734	0.660045901302808	-3.59591488866115
O60930	RNASEH1	0.112351001289619	3.35456481247784	2.49457264040271	0.0490604798208592	0.704853934804554	-3.59641650626842
Q9NP66	HMG20A	0.0857213405187546	3.32397008641532	2.5682788635051	0.0445425512141894	0.693258820639974	-3.60129055431353
Q9NZM4	GLTSCR1; BICRA	0.0681370238470208	3.37554417704855	2.66888245422795	0.0390810014881866	0.66864753973843	-3.60152415299166
Q9NVK5-1	FGFR1OP2	0.0886667764415761	3.21476303554126	2.56496850742318	0.0447356293846316	0.693258820639974	-3.60179442200502
Q8NHQ8-1	RASSF8	0.0943956008018558	3.36454615190779	2.51309006298814	0.0478812253637015	0.701085908826398	-3.60393241145082
Q9BVC3	DSCC1	0.0812178576020225	3.36610674250755	2.64262392677082	0.0404334323212444	0.672312518714107	-3.60787622435764
Q9NQX4	MYO5C	0.0629340340557768	3.39786283077957	2.77361391619143	0.0341526097704515	0.66660007029301	-3.60840140376134
Q56NI9	ESCO2	0.13639600052806	3.29554844289614	2.61208992478675	0.0420696273260669	0.681850912476299	-3.61038770683325
P51825-2	AFF1	0.110641448080195	3.3265975680289	2.47660765169514	0.0502341537595748	0.708559878261919	-3.61129643328292
Q01081	U2AF1; LOC102724594; U2AF1L5	0.0794959226322196	3.28159575873888	2.89493863725153	0.0292695098748399	0.659251084934869	-3.61374570388063
Q8TDX7-1	NEK7	0.137843789759271	2.51704842809907	2.45851114311086	0.051446662985281	0.708615437025271	-3.62427731945448
O14524-1	TMEM194A; NEMP1	0.194190455917454	3.29291700066763	2.4723316099122	0.050517891226148	0.708559878261919	-3.62432486418942
P49458	SRP9; SRP9P1	0.097261575620839	3.35132056723603	2.6812415824775	0.0384613747928036	0.66660007029301	-3.62865712758298
P41134	ID1	-0.249486429990279	3.31831694696784	-2.65505916041437	0.0397867909232986	0.66919843269848	-3.62979031678834
O60841	EIF5B	-0.0427472478619763	3.32212661941833	-3.35419556750268	0.0166433102646858	0.629498284318049	-3.63295190793313
Q96CS4	ZNF689	0.114836747968465	3.35780369497447	2.46488152746758	0.0510163215079069	0.708559878261919	-3.63300546261465
Q99961	SH3GL1	-0.0625341325516471	3.36582488467568	-2.8043380188443	0.0328375713030999	0.663924515805512	-3.6403952570796
Q13247	SRSF6	0.0540007065787071	3.33278925259736	2.8171023564188	0.0323074686171712	0.662735024681651	-3.64230556011386
Q7Z7K0	CMC1	0.109286337604848	3.24228033640178	2.43569229547431	0.0530200670062978	0.718135913649593	-3.6425787276338
A8MTY0	ZNF724P; ZNF724	0.124939485233985	3.4167914168736	2.43048906874951	0.0533859393316209	0.718556011495079	-3.64366699722939
P37108	SRP14	0.0667142227811669	3.33800564356231	2.76327983855476	0.0346076547050254	0.66660007029301	-3.64838541372001
P01033	TIMP1	0.134829485297011	3.34823373653831	2.42262916874203	0.0539437038970743	0.719760399457179	-3.65106728536388
Q9ULZ3	PYCARD	-0.200779667239637	3.30905132637369	-2.45349416330135	0.0517882915439342	0.709956712674627	-3.65384476250444
Q04837	SSBP1	0.0818977988541519	3.26452753252859	2.77512615695771	0.0340865656734685	0.66660007029301	-3.65653699833533
P55201-2	BRPF1	0.0669716412415807	3.2720316626263	2.57821154868593	0.0439685559973048	0.692662754848712	-3.65658458111358
Q9BQ61	C19orf43; TRIR	-0.136970301375968	3.26517205735621	-2.50580846331587	0.0483412989792968	0.701085908826398	-3.65817124529558
P58317	ZNF121	0.104397525388832	3.40161687384409	2.54642464407665	0.0458338924144393	0.697893294958011	-3.65832870052617
Q96PE7	MCEE	-0.0912579599986564	3.06837858062343	-2.45989282406988	0.05135299917454	0.708615437025271	-3.65980898354847
Q8NEM2	SHCBP1	0.0903856923895799	3.23367525425671	2.63761438067664	0.0406971172334018	0.672312518714107	-3.66060954019704
Q13526	PIN1	-0.0759461953598782	3.24136847247324	-2.74374112243532	0.0354860402607784	0.66660007029301	-3.66749227646262
Q53TQ3-2	INO80D	0.0795231046897915	3.3800614741063	2.52986354559034	0.046839100275217	0.701085908826398	-3.66793326789623
Q6NSI4-1	CXorf57	0.0975725918181508	2.93880130891592	2.44581584716534	0.0523158153367353	0.714176041394009	-3.66837936491495
O14595	CTDSP2	0.137763240341181	3.38396901081974	2.40894657923745	0.0549294468212117	0.719760399457179	-3.66919274736498
Q8NEJ9	NGDN	0.0712669188587844	3.36492196992444	2.59471663194768	0.0430321965619264	0.68494400834668	-3.67263357105154
P27816-1	MAP4	-0.0540272679320506	3.34370423753193	-3.11338386754222	0.0222884799774809	0.637392751382476	-3.67286004757353
O00231-2	PSMD11	-0.0498705244130458	3.32432808178873	-3.10685007663219	0.0224685672138964	0.637392751382476	-3.67499217763
Q00535	CDK5	0.0880268982905383	3.01172116804942	2.46873673013616	0.0507577487474784	0.708559878261919	-3.67749191673926
Q14738-1	PPP2R5D	-0.083159092344371	3.34698123729411	-2.65993691526778	0.0395361889622656	0.668759953917798	-3.67913774142744
Q9NXH9-1	TRMT1	-0.0541431669524263	3.36222823417843	-2.71000776637997	0.0370597946775031	0.66660007029301	-3.68149968854131
P35968	KDR	-0.133400178291717	3.46954989769594	-2.56206208980189	0.0449058859251102	0.693258820639974	-3.68585170524983
Q9Y3C8	UFC1	-0.188775749966548	3.10154048098636	-2.50935472494066	0.048116649477155	0.701085908826398	-3.69282503958007
P60660-2	MYL6	-0.0696748246712797	3.31136621976459	-2.83240124364269	0.031684309207577	0.660045901302808	-3.69394081842015
Q8TDB6-1	DTX3L	-0.104721170940913	3.36622459865883	-2.38797179354321	0.0564777338743608	0.719917861872589	-3.69622075513354
Q96FZ2	C3orf37; HMCES	-0.0861935159284164	3.22201644766703	-2.50984220281825	0.0480858557098539	0.701085908826398	-3.69628812983076
P39880-3	CUX1	0.0898214316529584	3.10991223745832	2.4349241385325	0.0530739133262929	0.718135913649593	-3.69762946893039
P26368	U2AF2	0.0511502294269663	3.30919551553318	2.99649745947969	0.0257644661252328	0.653293963276585	-3.70003016531302
Q99728	BARD1	0.069243500505574	3.32563288020356	2.69780649831201	0.0376474358657454	0.66660007029301	-3.70075240028649
Q9H4E7	DEF6	0.122414930495326	3.04171017026372	2.3724932269273	0.0576498598443239	0.719917861872589	-3.70177942175087
Q8TAD4-1	SLC30A5	0.133305256166608	3.27400837623725	2.41556470319101	0.0544502924164445	0.719760399457179	-3.70372423010281
Q14188	TFDP2	0.132962394309125	3.37691823780681	2.36880854694748	0.0579326529056802	0.719917861872589	-3.70427852598651
O43172-1	PRPF4	0.0535458560099243	3.30055135877769	2.93077487439712	0.0279766083589344	0.659251084934869	-3.70489357135349
Q96BP2	CHCHD1	-0.121343695597566	3.32329538660175	-2.36988718270766	0.0578497181360158	0.719917861872589	-3.70506221297884
Q9UKK6	NXT1	0.130461612740819	3.22264085175536	2.37543003403112	0.0574255085431392	0.719917861872589	-3.70531789522157
Q03164-3	KMT2A; MLL	0.0593951774637434	3.36354032933499	2.94544105238504	0.0274655573321553	0.659251084934869	-3.70828900181894
P82932	MRPS6	-0.0989894407061	3.32346940385107	-2.5088089936049	0.0481511480330444	0.701085908826398	-3.71312914936368
O43251-8	RBFOX2	0.168597939297815	3.31175219187531	2.45645499991348	0.0515863845735957	0.709266563528004	-3.71585239022846
Q9Y2T7	YBX2	-0.149878988307335	3.4220564554143	-2.39025469687078	0.0563070014712964	0.719917861872589	-3.71940680328194
Q969G5	PRKCDBP; CAVIN3	0.19551881994234	3.47464222388418	2.37801414068656	0.0572288635374838	0.719917861872589	-3.71974041821602
Q9NVV4	MTPAP	-0.103052158801666	3.35900159334588	-2.62392674995331	0.0414270523525549	0.675060642286721	-3.72343628432716
Q14687	GSE1	-0.0528378735056223	3.32222096932295	-2.68480852994441	0.0382845192825211	0.66660007029301	-3.72713762947386
Q9C0J8	WDR33	0.0463675396473176	3.34898835022916	2.91741416309431	0.0284512093238053	0.659251084934869	-3.72799225321897
Q96TA1	FAM129B	-0.078768204868505	3.37038427488553	-2.7519424038768	0.0351144401814207	0.66660007029301	-3.72816264604689
Q96DR4	STARD4	0.212946846318261	3.3913797629461	2.38437634691633	0.0567477383640247	0.719917861872589	-3.73109282520529
P22681	CBL	-0.0570752886372371	3.36981052104904	-2.71171270284815	0.0369784721394588	0.66660007029301	-3.73242408102711
O95372	LYPLA2	-0.0920807832367231	3.35647387791589	-2.62861509322197	0.0411754608823353	0.674206532563889	-3.73339506925296
Q86WB0	ZC3HC1	0.0658432557465154	3.33088343005973	2.89664697929837	0.0292064196788001	0.659251084934869	-3.73371523733542
Q9H1B7	IRF2BPL	-0.0943012068882146	3.39310238851305	-2.70556334073309	0.0372726947124684	0.66660007029301	-3.73396079728982
Q9BSB4	C12orf44; ATG101	-0.109304581184616	3.34026077189307	-2.40048405668962	0.0555486481763644	0.719917861872589	-3.73765721865274
P52657	GTF2A2	-0.138844987135211	3.35107378115666	-2.33564024005655	0.0605451069395806	0.721248879242078	-3.7389231374924
Q96PM9	ZNF385A	-0.146443244722733	3.22623052656943	-2.33237316392597	0.0608090654410339	0.721248879242078	-3.7406866881677
Q15648	MED1	0.0407961347920262	3.32099002830915	2.93646683177751	0.0277770471295427	0.659251084934869	-3.74428480601935
Q8TAE8	GADD45GIP1	-0.160542117927491	3.31932991677517	-2.41274245186943	0.054654080869422	0.719760399457179	-3.74571261952449
Q27J81	INF2	-0.0935341722864436	3.35417242640023	-2.56051744975461	0.0449966521561513	0.693258820639974	-3.74773007429857
Q6P161	MRPL54	-0.139847154717563	3.27407270190122	-2.32340637923575	0.0615397648711226	0.721248879242078	-3.7483687456101
Q9H9J2	MRPL44	-0.174649145239656	3.31666398894517	-2.46634693006497	0.0509178707359261	0.708559878261919	-3.74992143502603
Q9NRN5-1	OLFML3	-0.151322642394774	3.41065808345654	-2.33282805541931	0.0607722406996739	0.721248879242078	-3.75117545996647
Q8N668	COMMD1	0.118107950031763	3.23637502356223	2.35257607032053	0.0591960079895185	0.721248879242078	-3.7522839890676
Q15006	EMC2	0.0588607165181801	3.31523339867807	2.56539054534367	0.0447109640835022	0.693258820639974	-3.75263778958016
Q9H1I8-1	ASCC2	-0.056862019426042	3.30466926698409	-2.60815016969016	0.0422858671163807	0.681850912476299	-3.75564833313878
Q96Q89-3	KIF20B	0.0628748001301926	3.38390256107982	3.08658988188682	0.023037230643367	0.638197663657005	-3.75738808079115
Q5VYK3	KIAA0368	-0.038100082426599	3.36882422637188	-3.19754790233747	0.0201053508968079	0.630961708693689	-3.75918762033926
Q9UKY7	CDV3	-0.0880023712079951	3.07429025436109	-2.62787288889646	0.0412151803665881	0.674206532563889	-3.75937684935119
Q8N0U4-1	FAM185A	0.168331851170371	3.32668176310883	2.38345846379341	0.0568168862650727	0.719917861872589	-3.75970778402431
Q96AV8	E2F7	0.121008491514325	3.29037763579788	2.31098057001869	0.0625676372680556	0.721248879242078	-3.76129291724886
Q9H1P3-1	OSBPL2	-0.0802649154400294	3.30125036872666	-2.46181003225875	0.0512233321154031	0.708615437025271	-3.76418604731394
P09417	QDPR	-0.0767829513451726	3.28683892200257	-2.64968177062136	0.0400650440324469	0.671133226674525	-3.76426396193701
Q8NEZ4-3	KMT2C; MLL3	0.0553396221804427	3.25798797797954	2.66093682651915	0.0394850270839685	0.668759953917798	-3.76656252916213
Q8IUH5-1	ZDHHC17	0.118108975654215	3.30274678298471	2.35836712958418	0.0587419944645778	0.719917861872589	-3.76816474496768
P30419	NMT1	-0.0785026852675678	3.2818547788489	-2.66775274320741	0.0391381735527462	0.66864753973843	-3.76991809571348
P14868	DARS	-0.0562883946433294	3.29194787230324	-2.9974586023216	0.0257335683040082	0.653293963276585	-3.77156678608707
Q9UM82	SPATA2	0.116936744476488	3.34604162851731	2.29656946592178	0.0637823652607347	0.721248879242078	-3.77429664050797
O43482	OIP5	-0.149568787576177	3.38321790621823	-2.3618748680228	0.0584687780728398	0.719917861872589	-3.77476679864327
Q9P275-2	USP36	0.0396677340667232	3.36555505346658	2.85817218293005	0.0306639149330129	0.660045901302808	-3.77638988980917
Q8IUH4	ZDHHC13	0.0953895096303613	3.33124832037315	2.51782607989576	0.0475844967799338	0.701085908826398	-3.7770596221115
Q12926	ELAVL2	0.117268706183743	2.93736111730389	2.31151122692201	0.0625233741181957	0.721248879242078	-3.77897011270533
O75380	NDUFS6	-0.170500969844711	3.30544315894574	-2.46744143453488	0.0508444699255376	0.708559878261919	-3.77965059429357
Q9BRQ8-1	AIFM2	0.115030484434898	3.29335089777613	2.2927083259275	0.0641120122812745	0.721248879242078	-3.78112567043259
Q8N448	LNX2	0.111495951182678	3.38016717790641	2.31641422265359	0.0621159586101618	0.721248879242078	-3.7855238925823
P62834	RAP1A	0.129758242751836	3.22913731024558	2.37610144811273	0.0573743468448847	0.719917861872589	-3.78586823151303
P26639-1	TARS	-0.0541448159955198	3.38744520249823	-3.10376562805558	0.0225541373269814	0.637392751382476	-3.78695741987417
Q9HD33-1	MRPL47	-0.133193718869055	3.31594024921659	-2.59552527192596	0.0429868736401224	0.68494400834668	-3.78719567172239
P60510	PPP4C	-0.083024068919385	3.33542391598872	-2.48967193989237	0.0493777247501917	0.707737152657494	-3.78926989793505
O75607	NPM3	0.109894080530854	3.32394099318145	2.29992883209304	0.0634970044230688	0.721248879242078	-3.7915847972338
Q96EE3-1	SEH1L	-0.045870676714436	3.35415251613606	-2.76450001190622	0.0345535862028954	0.66660007029301	-3.79173715059864
Q9Y221-1	NIP7	-0.0871690290006046	3.34921901917321	-2.55861070871682	0.0451089668939546	0.693258820639974	-3.79405588962496
Q01082-1	SPTBN1	0.0892185534802128	3.36960037307767	2.72526677738041	0.0363387771457452	0.66660007029301	-3.79678319871605
P49757	NUMB	0.0689318224778113	3.37676881112129	2.55719574961148	0.0451925074787306	0.693258820639974	-3.79842191674183
Q13206	DDX10	0.0638972386948713	3.35453486192896	2.86138487556327	0.0305392338974619	0.660045901302808	-3.79980336753586
Q9HBM1	SPC25	0.114407006339281	3.27251010225994	2.41627828266413	0.0543988940031884	0.719760399457179	-3.8026500388176
Q6W2J9-1	BCOR	-0.0543351439950801	3.27507717764198	-2.75406830844527	0.0350188036822108	0.66660007029301	-3.80273088827211
Q96FH0-1	MEF2BNB; BORCS8	0.119465096203601	3.10456069163177	2.26984904204078	0.0661005830874109	0.727771020609183	-3.80467606936571
Q9UKI2	CDC42EP3	-0.165619372428825	3.42255608450275	-2.26459019729242	0.0665671364971985	0.727771020609183	-3.80579418248311
P14550	AKR1A1	-0.0799926714139677	3.28042007717358	-2.63332935099806	0.0409241327215183	0.672312518714107	-3.81198882817542
Q68CZ1	RPGRIP1L	0.141088733370217	3.3200081995637	2.2542346988384	0.0674959564489303	0.727771020609183	-3.81500908748408
Q8N0S6-2	CENPL	0.0946520675256953	3.27993058121582	2.31458551791662	0.0622675880269267	0.721248879242078	-3.82471150808053
Q9NZ32	ACTR10	-0.0594708473000184	3.24893535091219	-2.5408335418167	0.0461706541712004	0.697893294958011	-3.82685685257665
Q05655	PRKCD	-0.0593771983177404	3.31634682645156	-2.59901377665804	0.0427919344979015	0.68494400834668	-3.82731493550719
P63010-2	AP2B1	0.0504600721147544	3.36502005623796	2.80929771524593	0.0326304827398808	0.663924515805512	-3.82978966692165
Q14320	FAM50A	0.0745071793590974	3.10844347537106	2.48519626510627	0.0496693643586333	0.708296214422741	-3.83524309537683
Q6NSW7	NANOGP8	-0.161349332081171	3.44143887775347	-2.23562505671379	0.0691993297160091	0.727771020609183	-3.83542867956919
Q6P996-1	PDXDC1; LOC102724985	-0.050995912617687	3.33452204621823	-2.75919241907817	0.0347894450839717	0.66660007029301	-3.83635691889776
Q14331	FRG1	0.0675156265254871	3.34631134762061	2.58003117624308	0.043864263319266	0.692441621780677	-3.83830965827888
P00505	GOT2	-0.119274502884087	3.34158666455275	-2.90740165242707	0.028812628725756	0.659251084934869	-3.83986902755808
O95619	YEATS4	0.0796733768936345	3.36406980797769	2.48320413787476	0.0497997625718789	0.708559878261919	-3.84074526171085
Q8IWA0	WDR75	0.0465398686838256	3.36911597316304	2.89308930916347	0.0293379741402225	0.659251084934869	-3.84322817190691
P29279-1	CTGF	0.0981230794328971	3.43110706820481	2.32841594396714	0.0611304058815568	0.721248879242078	-3.84341845854715
P32856	STX2	0.163266486141856	3.25689410806991	2.22658473240483	0.0700429494047279	0.727771020609183	-3.84478561172661
Q06730-3	ZNF33A	0.250824110875525	3.2919492661936	2.37617755069698	0.0573685508720107	0.719917861872589	-3.8471284181649
P52294	KPNA1	-0.106929656790376	3.27001605893629	-2.29885604918996	0.0635879858862447	0.721248879242078	-3.84743213594552
Q6PGP7	TTC37	-0.0397733280077985	3.2967963441242	-2.8287399584406	0.0318322449794107	0.660045901302808	-3.85488245798469
O75063	FAM20B	0.115885902361592	3.28169503455379	2.23517056390138	0.0692414876052099	0.727771020609183	-3.85491821965502
Q5T2E6-1	C10orf76	-0.106086993377702	3.31777699449075	-2.22767608774938	0.0699405398758606	0.727771020609183	-3.85572189207892
Q69YQ0-1	SPECC1L	0.0452765006690737	3.35245597970118	2.76917936034139	0.0343470802371076	0.66660007029301	-3.85669808359698
Q96DI7	SNRNP40	0.0536903486874986	3.31113815831514	2.76751362397222	0.0344204379050073	0.66660007029301	-3.85674957275849
Q14596-1	NBR1	0.0812791696595699	3.28088369947902	2.47035837397803	0.0506493998793207	0.708559878261919	-3.85739106485368
Q53GL0-1	PLEKHO1	-0.0751234035544607	3.32745924992057	-2.36914593603068	0.0579066980596785	0.719917861872589	-3.85868618774273
Q15233	NONO	0.0672906136066194	3.33053577929163	3.24296895583209	0.0190259218771033	0.630961708693689	-3.85979984872553
Q14686	NCOA6	0.080560597471662	3.17730880096715	2.29011209211613	0.0643346718277956	0.721248879242078	-3.86262421950976
P31483	TIA1	0.073032015142929	3.36523312837703	2.37540666018261	0.0574272904960164	0.719917861872589	-3.87061353992688
Q9NRL2	BAZ1A	0.0743677781305945	3.20013505782008	2.75996720520604	0.0347549068106759	0.66660007029301	-3.87086352788123
Q08AM6	VAC14	-0.0675819612375669	3.31982673762889	-2.44361895560549	0.0524677958299452	0.71497856058142	-3.87111489501985
Q96JN8-1	NEURL4	0.0825010782969426	3.32259676194598	2.36044900037656	0.0585796763213802	0.719917861872589	-3.87241760600104
Q15262-4	PTPRK	0.0934627418519587	3.38969913934361	2.5066835349846	0.0482857610088023	0.701085908826398	-3.87266913175691
Q7L0Y3	TRMT10C	-0.144146646893819	3.31450777910799	-2.76269377020275	0.0346336571950769	0.66660007029301	-3.87322052609412
P02545	LMNA	0.0796319246001631	3.2767206383034	2.95770864536573	0.0270459096395474	0.659251084934869	-3.87691880826997
Q96MM7-4	HS6ST2	0.108619852666809	3.37652844829079	2.21456820898477	0.0711809395301973	0.731057788588586	-3.87743163808303
Q96HI0	SENP5	0.0757833250446422	3.28770915007988	2.37730914342287	0.0572824416831628	0.719917861872589	-3.87834062941135
Q15276	RABEP1	0.0556724560229332	3.20465263233119	2.73555468422691	0.0358612109416491	0.66660007029301	-3.88460621936401
Q13608	PEX6	0.0673916610941242	3.3985257924813	2.40994205961491	0.0548570893709703	0.719760399457179	-3.88610892754227
Q56A73	SPIN4	0.140651425061555	3.33038692840121	2.17894728424825	0.074668826598316	0.736243234475022	-3.88700310824818
Q53GG5-2	PDLIM3	0.131272161261732	2.37985504652857	2.26519581681568	0.0665132320502413	0.727771020609183	-3.8889265846831
Q9ULW3	ABT1	0.0732408437354234	3.31440984192051	2.35414570547097	0.0590725857728381	0.721248879242078	-3.89266566487785
Q9Y2R5	MRPS17	-0.139202306207092	3.2997283137066	-2.36166586084707	0.0584850199488225	0.719917861872589	-3.89378783968812
P13682	ZNF35	0.139097204189604	3.40682159411108	2.21329378285448	0.0713027556175519	0.731329867777885	-3.89381187854207
O75147	OBSL1	0.0549267046443461	3.28058457708172	2.55586100712289	0.0452714636523237	0.693258820639974	-3.8938960777622
Q9Y6J0	CABIN1	0.0395192840916309	3.34212546451162	2.72733777925722	0.0362420914670007	0.66660007029301	-3.89513607499446
P14635	CCNB1	-0.0577527672545984	3.40373814025718	-2.48721015860505	0.0495379107112975	0.707737152657494	-3.90034061238124
Q9BPX3	NCAPG	-0.0516243872023972	3.32529944714792	-2.75026306873848	0.0351901868892963	0.66660007029301	-3.90209379729471
Q96GC6-1	ZNF274	0.122594612538811	3.3925617335503	2.16466772260226	0.0761164896241364	0.736243234475022	-3.90765045448279
Q6ZRI6	C15orf39	-0.0902747171505726	3.28772569250087	-2.33119618554691	0.0609044541683332	0.721248879242078	-3.9079644511032
O95391	SLU7	0.0847856302252278	3.30980541333635	2.67448228195908	0.0387989315743025	0.66660007029301	-3.9083146872861
Q6ZVM7	TOM1L2	0.138398770296142	2.48024117932059	2.15664362605038	0.0769427222367357	0.736243234475022	-3.90897800273306
Q14703	MBTPS1	0.169779856459502	3.28693258179421	2.15360322528667	0.0772582129623327	0.736243234475022	-3.91080793966295
Q96KP4	CNDP2	-0.0567673785911524	3.29526933295038	-2.75284702028168	0.0350737103886659	0.66660007029301	-3.91100253346087
Q9UBK8-1	MTRR	0.083100830083573	3.31920664490019	2.23778397903228	0.0689994378632038	0.727771020609183	-3.9155963995874
Q8TCC3-2	MRPL30	-0.151984575214752	3.34312572478558	-2.25758117857073	0.0671943255509469	0.727771020609183	-3.91770659804844
Q12789-2	GTF3C1	0.0339031468958131	3.34395796014225	2.99455201973875	0.0258271303981805	0.653293963276585	-3.91943384285358
P35236-3	PTPN7	0.204009827377033	2.7424811474454	2.19774863194167	0.0728062384882812	0.734642875539009	-3.9201367684935
P78406	RAE1	0.0374587156795754	3.29788953652432	2.73761834929591	0.0357662342603996	0.66660007029301	-3.92106484128267
Q9UPT9-1	USP22	0.0960194186099482	3.22644612101903	2.35947876133495	0.0586552644415738	0.719917861872589	-3.92152673529974
P00568	AK1	-0.0926671455923538	3.12815116395661	-2.38585380063368	0.0566366224193446	0.719917861872589	-3.92282832644617
Q8TEA1	NSUN6	0.0679709678494504	3.33231410030482	2.33826662299473	0.0603337869091541	0.721248879242078	-3.92344347820894
Q9BV20-1	MRI1	0.0938948010514588	2.98892682124642	2.17579846275441	0.0749855790696146	0.736243234475022	-3.9238054923154
O95983-1	MBD3	-0.0901643220046363	3.3946860215914	-2.37949456859863	0.0571165266706655	0.719917861872589	-3.92578471940627
Q8N6R0-5	METTL13	0.0504088001926335	3.3280710759431	2.66615037174452	0.0392194203444074	0.66864753973843	-3.92900844403082
P49750-4	YLPM1	0.0805071036633822	3.3419328645345	2.65700899528134	0.039686410804693	0.669173942183746	-3.93198521316122
Q9UKY1	ZHX1	0.174351608233074	2.82693463296355	2.15706503104169	0.0768991001300335	0.736243234475022	-3.93604543946898
Q96DH6-1	MSI2	0.0673991801357259	3.16868200390397	2.41211537813453	0.0546994700313668	0.719760399457179	-3.93756848409825
P08133-1	ANXA6	-0.0396520837682762	3.10922178832869	-2.88164038672937	0.0297657274675945	0.660045901302808	-3.93865525956868
Q9NX55-2	HYPK	-0.136345264713643	3.31384951532835	-2.26890094298022	0.0661844427658095	0.727771020609183	-3.93962534060182
Q9UIF8-1	BAZ2B	0.0634003992741162	3.32535647052779	2.35321510583818	0.0591457271163623	0.721248879242078	-3.93962572343127
Q9GZQ3	COMMD5	-0.500573700836141	3.16461003036309	-2.13199192293388	0.0795396900846231	0.743274667879694	-3.94588902729753
Q96RQ1	ERGIC2	0.152968990070077	3.09412732983374	2.11515172818019	0.0813657242934173	0.745488057719842	-3.94633361184612
Q69YN4	KIAA1429; VIRMA	0.064047745366172	3.3442341806428	2.68898724426375	0.0380784451891932	0.66660007029301	-3.94756131761933
Q5T9S5-1	CCDC18	0.164005205198976	3.32777338799559	2.12686192946757	0.0800914224217382	0.745488057719842	-3.94782069753358
Q9H6D7	HAUS4	-0.129517551584406	3.25448580382782	-2.50173978204446	0.0486004206411599	0.702618337490374	-3.9510196434794
P30990	NTS	0.114625005361346	3.42541712840403	2.11622632707354	0.0812479189886978	0.745488057719842	-3.95381661693346
Q96HS1-1	PGAM5	-0.110081562028716	3.32580896812841	-2.43780388155759	0.0528723472530444	0.718135913649593	-3.95424481863769
Q15628	TRADD	0.132964363552577	2.54959760342924	2.10614551851094	0.0823600065247105	0.745488057719842	-3.95500350717265
Q96EK6	GNPNAT1	-0.117413814312268	3.31262555140027	-2.28976053614125	0.0643648844479164	0.721248879242078	-3.95525304534884
Q86T24	ZBTB33	-0.0697112962989431	3.28781225301542	-2.32901963662464	0.06108126860034	0.721248879242078	-3.96112614728251
Q9H446	RWDD1	-0.202933040453845	3.17746170109398	-2.20351773397891	0.0722444520609099	0.734642875539009	-3.96223864380031
Q15746-1	MYLK	0.0517543761516992	3.40455420445165	2.51315976274055	0.0478768441438377	0.701085908826398	-3.96302322320443
Q96EU7	C1GALT1C1	0.157908283520772	3.37694787959364	2.16671692728187	0.0759069638173031	0.736243234475022	-3.96530792452038
Q9UGY1	NOL12	0.203707517477935	3.38461846670641	2.25514906587721	0.0674134007521863	0.727771020609183	-3.96561267902133
P05771-2	PRKCB	-0.100457285863247	3.31661967480526	-2.106908689072	0.0822752687665033	0.745488057719842	-3.96996851821534
Q7Z7G8-2	VPS13B	0.0658539928037124	3.35385681294147	2.41153382198091	0.0547416001907981	0.719760399457179	-3.97122339955897
Q9ULW6	NAP1L2	0.122086821703073	3.44373258326712	2.16658217894743	0.0759207230855227	0.736243234475022	-3.97209747704748
Q02218	OGDH	-0.12432958251918	3.33621961469593	-2.72633842927313	0.0362887118501776	0.66660007029301	-3.97324049635828
Q53SF7-1	COBLL1	0.0920403360659403	3.02484045558352	2.16847835705493	0.0757273404744708	0.736243234475022	-3.97330803583822
Q9NVA2-2	SEPT11	-0.0607394323525265	3.33853933930495	-2.39467233645799	0.0559781653550813	0.719917861872589	-3.97484166197483
P46531	NOTCH1	-0.0746181866968108	3.43686772595089	-2.40381658673483	0.0553039303803744	0.719760399457179	-3.9844578135958
Q96H79	ZC3HAV1L	0.0816020930692831	2.66621263153157	2.22648424713097	0.0700523865041885	0.727771020609183	-3.98612211523651
Q96SN8	CDK5RAP2	0.0501045397128794	3.29293057580491	2.61519110524045	0.0419002486455665	0.681056583916919	-3.98812144536022
Q9HC52	CBX8	0.135755617969729	2.52764901819191	2.1036042575594	0.0826428218957699	0.745488057719842	-3.9920815116226
Q9NPH0-1	ACP6	0.0929086426179634	3.19494593403893	2.1897594315	0.073591730214051	0.734642875539009	-3.99228697725799
P20042	EIF2S2	-0.147034913519252	3.29148305813958	-2.819365044848	0.032214471689307	0.662735024681651	-3.9941824148731
P67936	TPM4	-0.125435128830845	3.37435126323295	-2.38813323158256	0.0564656423816487	0.719917861872589	-3.99779230116183
Q13404-1	TMEM189-UBE2V1; UBE2V1	-0.0974393458143451	3.27823000948554	-2.32582663823116	0.0613416333977177	0.721248879242078	-3.99909548186815
Q96L73-1	NSD1	0.0491397097830333	3.3930112514589	2.86517514954136	0.0303928459963205	0.660045901302808	-4.00145814296358
Q96F10	SAT2	-0.160374827758667	3.30069408936546	-2.06392516679901	0.0871907400264511	0.75221525295928	-4.00364806437557
O00522	KRIT1	0.104116627580939	3.15875229693432	2.06919881697705	0.0865717496452813	0.75221525295928	-4.00445447387288
Q9P016	THYN1	-0.108568345649663	3.31460954883994	-2.52137608027887	0.0473633627640347	0.701085908826398	-4.00479371284352
Q9HCC0-1	MCCC2	0.161130094479489	1.80341999627881	2.19388132325038	0.0731853744675985	0.734642875539009	-4.00734153384614
O95182	NDUFA7	-0.133876656233156	3.27469620777197	-2.37569635091823	0.0574052094557105	0.719917861872589	-4.00817134293661
Q96QT6-1	PHF12	0.0612330308957961	3.35320014576992	2.40371258875076	0.055311549998974	0.719760399457179	-4.00859970759909
Q9UKF7-2	PITPNC1	-0.116042496485914	3.40979980017872	-2.30727959337671	0.062877259992341	0.721248879242078	-4.01279773919894
Q9BT23	LIMD2	-0.105296277971853	3.30135640568064	-2.24188084552714	0.0686217702207559	0.727771020609183	-4.01775678530524
P62745	RHOB	0.128788962460413	3.18342618664991	2.06745789004242	0.0867755888651326	0.75221525295928	-4.01803382794903
Q9BRT2	MNF1; UQCC2	-0.097840173577139	3.22162387166832	-2.18694360102343	0.0738706763404104	0.735065925919104	-4.01805848777917
Q99766-1	ATP5S	-0.139906986263702	3.25599963798832	-2.04258641954174	0.089742094542539	0.752260118983765	-4.0198225761856
P35269	GTF2F1	-0.0862340697060745	3.36521208635013	-2.50641521038944	0.048302783470644	0.701085908826398	-4.02486905993679
Q5TKA1-2	LIN9	0.10297227026248	3.25549772417839	2.06607327033968	0.086938061243957	0.75221525295928	-4.02628984547707
Q5KSL6	DGKK	0.114071218333449	3.3573922739439	2.09961696781939	0.0830885845576373	0.745488057719842	-4.02636857030195
Q96A09	FAM46B	-0.140886011984444	3.46220291244973	-2.02429569951256	0.0919898547833997	0.760502333942072	-4.02879425176144
Q9NQS3-1	PVRL3; NECTIN3	0.128989327112214	3.32004341193736	2.04671827132346	0.0892421630092156	0.75221525295928	-4.02963990937807
Q9H410	DSN1	0.0618258856239588	3.22743499325526	2.27363928011156	0.0657664451741391	0.727771020609183	-4.03199358124
P09455-1	RBP1	-0.0918172924148188	3.27811771051623	-2.28745136476508	0.0645637042054848	0.721248879242078	-4.03267425089738
O43166-2	SIPA1L1	0.0452046569838346	3.41113229511943	2.72806429460347	0.036208239622278	0.66660007029301	-4.03283631715179
P56962	STX17	0.0991517489245333	3.25404719586527	2.12312414847431	0.0804959117152445	0.745488057719842	-4.03542242273511
Q9H6Z4	RANBP3	-0.167373138277304	3.38113829343393	-2.03468007193989	0.0907067318988076	0.755008234837473	-4.03738906918842
P51946	CCNH	-0.0767766542230778	3.3290644197946	-2.32189745755069	0.0616636313775098	0.721248879242078	-4.03763234608835
O95625	ZBTB11	0.0811417540214634	3.30689272060567	2.14433636236327	0.0782280929049371	0.739120601929406	-4.03851248962087
O43768-4	ENSA	-0.143630275583168	3.31276135909222	-2.16323236531974	0.0762636083443851	0.736243234475022	-4.03880210202819
Q9UBI1	COMMD3	0.113525060599021	2.50929094053006	2.10261952516757	0.0827526811878425	0.745488057719842	-4.03887390031556
Q06210-1	GFPT1	-0.0448258980325812	3.31234355459689	-2.78072057830249	0.033843440046468	0.66660007029301	-4.04173064791648
O43716	GATC	-0.109373671431333	3.32302964700601	-2.06307706690041	0.0872907085159429	0.75221525295928	-4.04294075072168
Q8WUA4-1	GTF3C2	0.0534786804055282	3.33207399058835	2.49521067486009	0.0490193368689798	0.704853934804554	-4.04418946399814
O15078-1	CEP290	0.0600783689279506	3.21413528900606	2.44726888307442	0.0522155513985926	0.714077915026742	-4.04454552933811
P13010	XRCC5	-0.046348320768446	3.34321229613667	-3.10180204049878	0.0226087985524735	0.637392751382476	-4.04596209092684
P12757	SKIL	0.0818344065676684	3.40503726296233	2.36316307320728	0.0583687770723402	0.719917861872589	-4.04704040391837
Q9HAU5	UPF2	-0.0667286297463451	3.36068841571949	-2.6535956196457	0.0398623153992708	0.66919843269848	-4.04788166460174
Q9P206-2	KIAA1522	-0.0679414790586967	3.34430519747975	-2.23666065117049	0.0691033700067154	0.727771020609183	-4.04903548363442
Q9UN79	SOX13	-0.0717820502397259	3.42789016807005	-2.18144290483085	0.0744187695324076	0.736243234475022	-4.05003074761316
Q9H7E9-2	C8orf33	0.0915773919727585	3.30713232848312	2.11354636452947	0.0815420444313787	0.745488057719842	-4.05003184245631
Q8N697	SLC15A4	0.117923003703255	3.32034673745512	2.01740792821838	0.0928511524291822	0.762799297725153	-4.05084057822893
Q9UL12	SARDH	-0.118801011052045	3.38346129057697	-1.99969262264273	0.0951044380594896	0.764153550100263	-4.05117797992744
Q9NYF8-1	BCLAF1	-0.176261941579961	3.35929192588944	-2.00644083934826	0.0942395953052173	0.764153550100263	-4.0519437161583
Q9BYC5	FUT8	0.111163868965326	3.30321751495339	2.08544956789089	0.0846925812779267	0.749436543903407	-4.05356001884489
O43463-2	SUV39H1	-0.0771411248553077	3.40214368913831	-2.223899503373	0.0702955897250485	0.728372647599148	-4.05971491108505
O60343-1	TBC1D4	0.0358955921992122	3.29259430987096	2.62362366381274	0.0414433736336087	0.675060642286721	-4.06021330398093
Q9P0V9-2	SEPT10	0.0614407245488489	3.39075828183289	2.404048199173	0.0552869648269102	0.719760399457179	-4.06184157915818
P21675-4	TAF1	0.0484986931269907	3.33059309877358	2.58354943514034	0.0436633634805099	0.692118439302628	-4.06224797112418
Q9NYH9	UTP6	0.052334661063613	3.38609894408859	2.66125176656462	0.0394689274864428	0.668759953917798	-4.06679097843952
Q8N183	NDUFAF2	-0.108799271783248	3.32764577633219	-2.38440848965715	0.0567453185315805	0.719917861872589	-4.06877155788122
Q9Y2V2	CARHSP1	-0.0950715558540006	3.3540127915952	-2.16540018401103	0.0760415285528583	0.736243234475022	-4.06919824443865
P42025	ACTR1B	-0.10362661414703	3.25885412603013	-1.99724908674297	0.095419590849329	0.764153550100263	-4.06930235775306
Q9H3K6-1	BOLA2B; BOLA2; LOC107984053	-0.0717715387153178	3.18353673524326	-2.14073245478042	0.0786086788442838	0.740036484279522	-4.07134904956072
O60502	MGEA5	-0.0799204702287939	3.37906919456851	-2.68813448399229	0.0381204019384962	0.66660007029301	-4.07198426183053
P40692-1	MLH1	-0.0497045596547118	3.42183781806833	-2.48826382401658	0.0494692820087383	0.707737152657494	-4.08459281967334
Q12979	ABR	-0.0710427791047774	3.17052084270174	-2.15817818337494	0.0767839944403785	0.736243234475022	-4.08477137212679
Q00534	CDK6	0.0953269904350532	2.85495679654658	2.12483774572908	0.0803102109601639	0.745488057719842	-4.08727893457516
Q8TEA8	DTD1	-0.09331565910536	3.35281303901206	-2.06349070569265	0.0872419367763011	0.75221525295928	-4.0889158926896
Q96BU1-1	S100PBP	0.110732514579468	3.31424580757123	2.09867224870508	0.0831945629828686	0.745488057719842	-4.09219903371419
Q9BZL6	PRKD2	0.0683461440288706	3.27130620274786	2.29038035355379	0.0643116275221607	0.721248879242078	-4.0924651321901
P16070	CD44	0.243092697270701	1.64884056059553	2.14854300884805	0.0777862672289773	0.737239570536456	-4.09315454102498
P21926	CD9	-0.158437983233383	3.25027433055326	-2.05148087061896	0.0886694544428189	0.75221525295928	-4.0948071330182
Q9BT73	PSMG3	-0.0807746440775159	3.33811857867585	-2.14475329085055	0.0781841869785071	0.739120601929406	-4.09843999285614
P25325-2	MPST	-0.0574354244065115	3.25160145049459	-2.24236769908141	0.0685770336100427	0.727771020609183	-4.09848183914801
Q8IX15-3	HOMEZ	0.0964319368078883	3.29954956000993	2.01796345765013	0.0927813803973176	0.762799297725153	-4.09915798202287
Q14CB8-2	ARHGAP19	0.0874462685691039	3.3373257322628	2.08863373434999	0.0843293215255869	0.748813142065165	-4.09987447858786
Q8ND25-2	ZNRF1	0.136607334236002	3.32731524301699	1.94314204422334	0.102676934662475	0.777496785576642	-4.1016675534294
Q6AHZ1-1	ZNF518A	0.0753037804040271	3.37101638588437	2.18159842427464	0.0744032155638225	0.736243234475022	-4.10306303728257
Q96ND0	FAM210A	-0.284960927666989	3.41055429230467	-1.94135541257402	0.10292590767048	0.777496785576642	-4.10645248046145
Q9NVR5	DNAAF2	-0.0775643438035068	3.4281579264481	-2.31430991934222	0.0622904733485704	0.721248879242078	-4.10650637469096
Q9BX63	BRIP1	0.0566198477691842	3.30612575096238	2.29230947357695	0.0641461662406967	0.721248879242078	-4.10764039281245
Q8IX21	FAM178A; SLF2	0.107477115561065	3.29551570531257	2.04948416437082	0.0889091007601554	0.75221525295928	-4.10945387650266
Q9H5Q4	TFB2M	-0.0672273666027314	3.33144438697897	-2.29470802355619	0.0639410643779766	0.721248879242078	-4.11146659429992
P41225	SOX3	0.0787209988494784	3.42972244485529	2.16693231232765	0.0758849760374302	0.736243234475022	-4.11239200494583
O60885-1	BRD4	0.0563328797961011	3.34292240265795	2.6061973242148	0.0423934939065686	0.681850912476299	-4.11320211724268
Q9NPJ6-1	MED4	0.0774813859235497	3.29791222142877	2.10498872420817	0.0824886214926779	0.745488057719842	-4.11428307977101
Q15054	POLD3	-0.05576844660025	3.3485543241804	-2.34623982263283	0.0596970042812891	0.721248879242078	-4.1154261668375
Q99536	VAT1	-0.0494711148828778	3.3713243142928	-2.49880742901832	0.0487880905914417	0.703575622213423	-4.1160720624568
P68036-3	UBE2L3	-0.101976748015044	3.25690281167182	-2.19528128114966	0.0730478913977329	0.734642875539009	-4.12100098302859
Q68DQ2	CRYBG3	0.059325004498957	3.31121585203546	2.31075103507416	0.0625867934344143	0.721248879242078	-4.12366503958224
Q9UN81	LOC440264; L1RE1	0.087573085161459	3.41273990072275	2.23398661138382	0.0693514347320949	0.727771020609183	-4.12390565881476
Q8TB45	DEPTOR	0.123660945533203	2.30892298533988	1.9382606691394	0.103358617885506	0.777632288017464	-4.12396605582597
Q9Y2P8	RCL1	0.0552777185657452	3.35985303091043	2.26039506271335	0.0669417907455383	0.727771020609183	-4.12703752963705
Q92777-1	SYN2	-0.102888740845823	3.24350433131256	-1.97619497210052	0.0981794868927334	0.771880054810092	-4.12898402689507
Q9H2M9	RAB3GAP2	-0.0466736958479774	3.34435425192446	-2.63670663061025	0.0407450954824174	0.672312518714107	-4.12902497905593
Q9NR45	NANS	-0.048711575427505	3.12828850966251	-2.38470857417363	0.0567227322443877	0.719917861872589	-4.12951456313545
Q8WVQ1	CANT1	0.114151303772866	3.25606787701142	2.26218854019845	0.0667813516267384	0.727771020609183	-4.13028866023624
Q01518-1	CAP1	-0.0515075960569465	3.33840645097054	-2.70620325789905	0.0372419597968312	0.66660007029301	-4.13276795864308
Q9H6W3	C14orf169; RIOX1	0.0706437100921927	3.39207561311469	2.22613091251015	0.0700855805457106	0.727771020609183	-4.13301978951979
Q8IYS1	PM20D2	0.0874930431774925	2.51902851908027	2.13976787330268	0.0787108669410961	0.740036484279522	-4.13715308573946
P31323	PRKAR2B	0.0660730095390586	3.36759681059474	2.10747928254337	0.0822119723351172	0.745488057719842	-4.14111439180857
A4D1E9-1	GTPBP10	-0.11423904051868	3.29736441874591	-2.32735168411736	0.0612171321248622	0.721248879242078	-4.14163730395831
Q00613	HSF1	0.0700614046999512	3.25005195618584	2.08344819412813	0.0849217282007743	0.750598500871359	-4.14205402183676
P42224-1	STAT1	-0.054433633571689	3.36101014082507	-2.59753849447294	0.0428742580061325	0.68494400834668	-4.14439606089816
Q9NRS6	SNX15	0.107019624691509	3.22375519466837	1.98434059713848	0.0971021987242482	0.769921363723944	-4.14442190171467
Q9NXK8	FBXL12	0.0720218977955327	3.34482049405978	2.05585298456305	0.0881470204339002	0.75221525295928	-4.14512783448027
O15144	ARPC2	-0.0668789227214198	3.25337425240023	-2.46600523567414	0.0509408088691023	0.708559878261919	-4.14538557856637
O00165-2	HAX1	0.242771534210329	3.31990261552597	2.09736678088802	0.0833412394344803	0.745488057719842	-4.14616640940795
Q9HAV4	XPO5	-0.0404984044216598	3.35929191480334	-2.68199594437815	0.0384238989448713	0.66660007029301	-4.14700809252752
O00754	MAN2B1	0.0567196960375505	3.36687707114077	2.3819099791788	0.0569337418185863	0.719917861872589	-4.14720808496267
O43159	RRP8	0.0843804469782473	3.30481011437311	2.43722578885575	0.0529127453047908	0.718135913649593	-4.14739082651963
P05997	COL5A2	0.13953372012185	3.45976700873055	1.91674185333858	0.106418722036198	0.777632288017464	-4.14885311285243
P22059	OSBP	-0.0569795326352098	3.29566493776395	-2.46403623866021	0.0510732029039157	0.708559878261919	-4.1492557471361
P40818	USP8	-0.145256126172893	3.39902236660807	-1.88295502398037	0.111408974900882	0.777632288017464	-4.14954969470003
Q6ZNG0-1	ZNF620	0.109264582056792	3.3843456952193	1.89946979414283	0.108940986070561	0.777632288017464	-4.15042758962676
P15336-1	ATF2	0.0648020387331582	3.31224025449665	2.13794077617112	0.0789048071980583	0.740951873712978	-4.15134072180679
P23443-1	RPS6KB1	-0.153346571947451	3.21552676497783	-2.05828619680015	0.0878576390887084	0.75221525295928	-4.15154933170157
P08473	MME	0.0845743349650585	3.42034137418706	2.34121116569903	0.0600977907113647	0.721248879242078	-4.15432246431768
Q14469	HES1	-0.111522384821212	3.29597348736772	-1.8904515482982	0.110281786789326	0.777632288017464	-4.15597141991284
O75821	EIF3G	-0.0455614553264295	3.33822707484042	-2.60735805515173	0.0423294873962365	0.681850912476299	-4.15677750822731
P29374-1	ARID4A	0.0872519377648976	3.35359089149166	2.25092554420267	0.0677956156007072	0.727771020609183	-4.15853822967298
Q9H116	GZF1	-0.1186487861343	3.46695577866277	-1.89972661667121	0.108903043960461	0.777632288017464	-4.15928734160785
Q5T5U3	ARHGAP21	-0.066328443582751	3.37729351279477	-2.11705354744158	0.081157353064628	0.745488057719842	-4.15970925038167
A1X283	SH3PXD2B	-0.0706333665041709	3.37941849273313	-2.54688220741752	0.045806449004819	0.697893294958011	-4.16017188805991
O14686-1	KMT2D; MLL2	0.0408306848350764	3.36341157618413	2.65918537264746	0.0395746896609333	0.668759953917798	-4.16039620712435
Q14194-2	CRMP1	-0.060388816865826	3.3736445041983	-2.56105140665923	0.0449652535751593	0.693258820639974	-4.16397750927188
P24752	ACAT1	-0.109873841053768	3.14003474850848	-2.52858410322519	0.0469177321233552	0.701085908826398	-4.16509212327651
P23434	GCSH	-0.0942749612109644	3.28083445154297	-2.15228771728633	0.0773951333682622	0.736243234475022	-4.1695743106609
Q6I9Y2	THOC7	0.088599408229563	3.33961669320353	2.32767441930459	0.0611908188561064	0.721248879242078	-4.17085560550784
Q8WVM0	TFB1M	-0.0968943170864149	3.31536852991569	-2.15355050778938	0.0772636950628085	0.736243234475022	-4.17166270616968
Q9BV44	THUMPD3	-0.0675664951328137	3.09494660285966	-2.05875567687953	0.0878019162277452	0.75221525295928	-4.17405248048037
Q9NUD5	ZCCHC3	-0.0784194774376	3.42848257281033	-2.17334826259092	0.0752330195241458	0.736243234475022	-4.17960734409098
Q06945	SOX4	0.0890111589274716	3.38549490892861	1.98352909486846	0.0972089812260343	0.769921363723944	-4.18166330561464
P42830	CXCL5	0.277299524031298	3.45362255900251	1.86089135376651	0.114794115624434	0.779922427471933	-4.18388639630779
Q9Y2T2	AP3M1	-0.0508483849514158	3.31806667746552	-2.28854462580952	0.0644694942221502	0.721248879242078	-4.18425882468985
Q5T3I0-3	GPATCH4	0.0442512635137645	3.36819573476481	2.41306383324165	0.0546308339428554	0.719760399457179	-4.18454663838613
Q96JA3	PLEKHA8	0.0762941158335354	3.33254434180153	1.97367907370259	0.09851467468005	0.772540300044155	-4.18596042304623
P49006	MARCKSL1	-0.0383067419721139	3.38584586739468	-2.45300604822061	0.0518216578594619	0.709956712674627	-4.18601658087229
Q969R5-1	L3MBTL2	0.0643772545812148	3.35541249377262	2.26794649971703	0.0662689761072922	0.727771020609183	-4.18662290995528
Q9Y6X9-1	MORC2	0.0706059467615714	3.33549587234375	2.48153772368626	0.0499091204967663	0.708559878261919	-4.18724399769138
Q5VST6-1	ABHD17B; FAM108B1	0.090423288333843	3.36819498381412	1.99429107185433	0.0958025228710664	0.766420182968531	-4.18773464077936
P12755	SKI	-0.127355413794878	3.38828949015355	-1.89021151906499	0.110317699534065	0.777632288017464	-4.18774323401128
Q9UKD1	GMEB2	0.145738473142394	3.35890890504305	1.86708658858777	0.113833315120244	0.777632288017464	-4.18951259658643
P14678-3	SNRPB	0.0563152335065554	3.34019146821972	2.69603480230715	0.0377335971116577	0.66660007029301	-4.18971301865298
Q99729-3	HNRNPAB	0.0805827211557053	3.33873679780038	2.81049765591692	0.0325805931722711	0.663924515805512	-4.19079155461231
Q96KB5-2	PBK	0.0537641103776578	2.78932647102309	2.24252861146478	0.0685622541904899	0.727771020609183	-4.19343080759697
Q8N8D1	PDCD7	0.0878481423296729	3.34517621581052	1.92067272998441	0.105852970392448	0.777632288017464	-4.19381617061778
P15822-1	HIVEP1	0.127397413456975	3.28700015607689	1.81997850349863	0.121346189269042	0.793913864270319	-4.20182531908827
P35219	CA8	0.083344200892299	2.29532160409485	1.94025241636605	0.103079918972754	0.777609772231044	-4.20207763503566
O60476	MAN1A2	0.12610095632393	3.16365000607852	1.95103794894657	0.101583900531574	0.777418231545286	-4.20213464055641
Q13595-1	TRA2A	0.0724962815209844	3.33384025616917	2.2103332763732	0.0715865748495337	0.732282936327497	-4.20217455996911
Q9Y5S9	RBM8A; LOC101060541	0.0821963932858388	3.29370464274205	2.22639671163948	0.0700606085025869	0.727771020609183	-4.20616742078685
Q9UKL3	CASP8AP2	0.0529764192524195	3.36363976062868	2.21779004693718	0.0708739461829193	0.729858946463566	-4.20681320165686
Q0ZGT2	NEXN	0.0611731565452979	3.37120866793919	2.26341529340431	0.0666718417319458	0.727771020609183	-4.20786266491313
Q9UHL4	DPP7	0.0846580692847663	2.73574554560088	2.09543456667804	0.0835588235031451	0.745488057719842	-4.20879547028339
Q16533	SNAPC1	0.106572711696104	3.36581011663333	1.86628013970811	0.113957926858927	0.777632288017464	-4.21050369878033
Q9P1Y6-1	PHRF1	0.0493835154370124	3.35049182794087	2.23084752099347	0.0696438276783893	0.727771020609183	-4.21136726546184
P62136-1	PPP1CA	0.0868734304160921	3.30462594502501	1.94173712779933	0.102872663085121	0.777496785576642	-4.21328206520633
Q9P0P8	C6orf203	-0.151570558256616	3.31148746158215	-1.99164231735187	0.0961467482471531	0.766957209678187	-4.21406367888101
Q8NCG7	DAGLB	0.0810441836730921	3.30874221277136	2.09008481670372	0.0841643098751994	0.748213888021472	-4.21484923306782
Q9BTU6	PI4K2A	0.0520686231319536	3.30200503182831	2.31324390654804	0.062379076817906	0.721248879242078	-4.21487486001092
P17706-1	PTPN2	-0.0893314711790367	3.3749796715098	-2.21083813660613	0.0715380915596984	0.732282936327497	-4.21522979308002
P51659-1	HSD17B4	-0.0828178234809901	3.3590032441086	-2.80320347810328	0.0328851432774418	0.663924515805512	-4.21680862629034
Q92888-3	ARHGEF1	-0.0422724742823068	3.30032492636459	-2.40316414414735	0.0553517512616965	0.719760399457179	-4.2170168807977
Q9Y247	FAM50B	0.594999576418956	3.06497198641653	1.7997601132342	0.12472054612073	0.793913864270319	-4.21744239090041
P45985-2	MAP2K4	-0.09021683781863	3.31724157093953	-2.0325041360644	0.0909740717324812	0.756178849763376	-4.21961759642848
P43243	MATR3	0.0517742435107188	3.36252040807622	2.67700677881984	0.0386724873390438	0.66660007029301	-4.21970306533754
Q6PCB5-1	RSBN1L	0.0503773246316445	3.23923772782003	2.25001409742905	0.0678783953552859	0.727771020609183	-4.22053573567483
Q9UL01	DSE	0.0980840319161356	3.39142700544755	1.88687394808869	0.110818281907156	0.777632288017464	-4.22362517088909
P40227-1	CCT6A	0.033872066583357	3.32065998589112	2.77771662487607	0.0339737532835135	0.66660007029301	-4.2242968795491
P98173-1	FAM3A	0.0993944968294785	3.24866627071067	1.85027332217039	0.116459773621842	0.781013446876552	-4.22446175014279
Q92581-2	SLC9A6	0.104946301782117	3.32835273115402	1.88621152802024	0.110917905762039	0.777632288017464	-4.2277143684537
Q9BX67	JAM3	0.140462963606298	3.30269514455507	1.94754888383915	0.102065432070461	0.777496785576642	-4.23366862137676
Q15059	BRD3	0.055674206610658	3.32975334858252	2.22087979846562	0.0705808349193185	0.728372647599148	-4.23553859703043
Q4G0N4	NADK2; NADKD1	-0.102037462242393	3.24712858302766	-1.91964574283632	0.106000485800093	0.777632288017464	-4.23555182807594
P14735	IDE	-0.0479521400892063	3.33008305933093	-2.46802793279174	0.0508051838548461	0.708559878261919	-4.23555942476196
O43708	GSTZ1	0.0592757669742926	3.29023226398713	2.08689800685018	0.0845271395115006	0.749436543903407	-4.23608777152312
Q9NV06	DCAF13	0.0580227011625098	3.37504413168862	2.30617962740998	0.062969592786433	0.721248879242078	-4.23753668107117
Q06323-2	PSME1	-0.081811219844743	3.13563891489631	-2.33925608865901	0.0602543755473045	0.721248879242078	-4.23847865286325
Q14376	GALE	-0.0729721901315556	3.25873206874682	-2.03072910559518	0.0911927526577231	0.75618465262235	-4.24261263329038
P61289-2	PSME3	-0.109570142472073	3.34449431095481	-2.31964129120496	0.0618493280550524	0.721248879242078	-4.24288715399302
O43237	DYNC1LI2	-0.0456844076903378	3.36866640204085	-2.33532820544317	0.0605702651328515	0.721248879242078	-4.24295804251798
Q9NRH2	SNRK	-0.112050823684443	3.20011938494791	-1.78962450875638	0.126447078494206	0.797986163892998	-4.24331136238081
Q9Y2S0-1	POLR1D	0.134163301914922	3.38265590532671	1.99935161532091	0.0951483553693821	0.764153550100263	-4.24340007986539
O75914-3	PAK3	-0.271220767578128	3.3317200288994	-1.76529419779108	0.130688929706806	0.80153112064763	-4.24417396066411
Q96S15-2	WDR24	0.0513356322874898	3.31517881532769	2.20182106153469	0.0724092016034383	0.734642875539009	-4.24468639197178
Q15393-1	SF3B3	0.0346265247450896	3.34018825994074	2.85115877893408	0.0309380244707781	0.660045901302808	-4.2455724156409
Q9Y5A6	ZSCAN21	-0.0952572195073335	3.28485032256584	-1.8099687995249	0.123005250043885	0.793913864270319	-4.24604375005065
Q9Y388	RBMX2	0.0842038374473512	3.35209179269455	2.00645909808274	0.0942372662052956	0.764153550100263	-4.24656881334426
O95396	MOCS3	-0.059612978576493	3.27413793946586	-2.06535748085481	0.087022175031418	0.75221525295928	-4.24838622573131
Q3YEC7-1	RABL6	-0.0718034718089045	3.31359749902173	-2.24206537920485	0.0686048099719391	0.727771020609183	-4.24853124259583
Q2M2Z5	PLK1S1; KIZ	0.143611692034519	3.31554944541969	1.75865525931591	0.131870648391385	0.80153112064763	-4.249297374711
Q53FA7-1	TP53I3	-0.0490977480436216	3.37778547647856	-2.21639334153728	0.071006861697079	0.730247510643418	-4.24940245764131
Q99574	SERPINI1	0.243111724177456	3.27741146194121	1.81524879966053	0.122127318973082	0.793913864270319	-4.24940538218718
O43524	FOXO3	0.0875326411383712	2.96760785039375	1.87594779687936	0.112473062410161	0.777632288017464	-4.25190280135735
Q9NZN5-2	ARHGEF12	0.0420382526584231	3.21333004564692	2.36231503428992	0.0584345884627156	0.719917861872589	-4.25403562567277
Q8N531-1	FBXL6	0.0855609921126981	3.41100186810004	1.91781879689114	0.106263419876058	0.777632288017464	-4.25510388296732
Q8N3R9-1	MPP5	0.0807732447915234	3.34400046189788	2.22208439405665	0.0704669028453109	0.728372647599148	-4.25562100839144
O43542	XRCC3	0.0797248904349647	3.20725519416342	1.88980112879896	0.110379128653235	0.777632288017464	-4.25665001534238
Q8TBC5-3	ZSCAN18	0.0759631259665123	3.36785844706371	1.98250375810783	0.097344072316505	0.769921363723944	-4.25696033220529
Q9P2Y4	ZNF219	-0.0609695597756886	3.37692236834685	-2.18960469972902	0.0736070300204777	0.734642875539009	-4.25813501734288
O15247	CLIC2	0.130701249680651	1.59113117279577	1.82402506516411	0.120681837289189	0.793913864270319	-4.258191482018
Q08379	GOLGA2	0.0375709322219051	3.32925354670915	2.52033113973455	0.0474283393548489	0.701085908826398	-4.25854354173579
P48556	PSMD8	-0.050110998350337	3.3700666927894	-2.31131217748775	0.0625399733710487	0.721248879242078	-4.25950292195366
O00217	NDUFS8	-0.0728787719070194	3.21072577107702	-2.10324184789833	0.0826832357572992	0.745488057719842	-4.26021279811488
O43516-3	WIPF1	0.0918496628016789	2.53300336382615	1.83846663457719	0.11834031537089	0.788113628060299	-4.26045659197293
Q9P2N6-3	KANSL3	0.0561098679396717	3.36015988497563	2.17919626610595	0.0746438398800498	0.736243234475022	-4.26181498302294
O75954	TSPAN9	0.142989446628852	2.99676638434906	1.74485993463008	0.134360037116807	0.80153112064763	-4.26185840077046
O75362	ZNF217	0.0547277137143969	3.34435119446148	2.33710467142306	0.0604271821501359	0.721248879242078	-4.26215218289957
P27037	ACVR2A	0.16578880763618	3.40364922010101	1.89946752247197	0.108941321739106	0.777632288017464	-4.26396420352544
Q86U28	ISCA2	-0.115929572939215	3.3317427559579	-1.77221084464752	0.129468917086802	0.80153112064763	-4.2640602436311
Q86V85	GPR180	0.166377182442581	3.02682763733218	1.73489047751006	0.136187826827479	0.802001738429253	-4.26984946426218
P53618	COPB1	-0.0412190868017317	3.32565812438299	-2.67978189415496	0.0385340023243048	0.66660007029301	-4.2704386875976
P20338	RAB4A	-0.0989583202862754	3.23518468205311	-1.83699090349125	0.118577490870907	0.789008248015265	-4.27102258177274
Q05397	PTK2	-0.0371561567057643	3.40068019956368	-2.47647918815788	0.0502426532382137	0.708559878261919	-4.27166606828918
P31327-3	CPS1	-0.0870696718006629	3.26958155118082	-2.05582732323852	0.0881500775350277	0.75221525295928	-4.27298901875341
Q8TDD1-2	DDX54	0.0606743793317296	3.38300050779402	2.41351289403949	0.0545983689377251	0.719760399457179	-4.27488772130572
Q92835	INPP5D	-0.22790159734145	2.45622378106002	-1.72879836097324	0.137316775293757	0.802001738429253	-4.27693859414186
Q5VIR6-4	VPS53	-0.0481117374593404	3.24522937535096	-2.29678172639882	0.0637642950539434	0.721248879242078	-4.27818142514578
O00232-1	PSMD12	-0.0788443192445603	3.31189404045546	-2.47911978605141	0.050068251516169	0.708559878261919	-4.27850148490143
Q9H2K2	TNKS2	0.135950061978544	3.33771173316488	1.71918699095676	0.139116621938945	0.802001738429253	-4.27944181795892
Q5JVS0	HABP4	0.0750126339782792	3.18722121538924	1.88533106474824	0.111050461391309	0.777632288017464	-4.28028086830242
Q6IA17-1	SIGIRR	0.104325976428652	3.38539535169569	1.85565722187354	0.115612193982502	0.779922427471933	-4.28274381017042
O15156-2	ZBTB7B	-0.106546499840536	3.29840498412218	-1.74094596656351	0.135074720513548	0.802001738429253	-4.28305053304789
Q9GZS1-2	POLR1E	0.0872175991421949	3.37369645305826	2.27747854082678	0.0654297886758433	0.727771020609183	-4.28398192464994
P62380	TBPL1	0.0859763737590392	3.36582530114269	1.81967932346859	0.121395452220497	0.793913864270319	-4.28484642217771
Q03933-2	HSF2	0.123368523129433	3.25183417981617	1.88346473894551	0.111331967659711	0.777632288017464	-4.28978397184786
Q9NVU7	SDAD1	0.0628565068379312	3.37653210059483	2.34001301799629	0.0601937011160017	0.721248879242078	-4.2906054143074
Q5VTJ3	KLHDC7A	0.108766014256228	3.4338608919555	1.85411491695104	0.115854363590548	0.779922427471933	-4.29200730850574
P22087	FBL	0.0705009493604882	3.37073177897977	2.69716392861983	0.0376786608178649	0.66660007029301	-4.29203739486814
Q86W50-1	METTL16	-0.0405633864109792	3.3191326390709	-2.29193794501816	0.0641779976183727	0.721248879242078	-4.29299270761148
O75717	WDHD1	-0.0357044222017116	3.37528493660986	-2.53557995489646	0.0464894962973394	0.699347873712132	-4.29322152646916
Q9NXR8-1	ING3	-0.109083235172305	3.33749948661392	-2.12430102598943	0.0803683270667995	0.745488057719842	-4.29343625484877
Q9H0A0	NAT10	0.0687503661049651	3.36934532787291	2.6338412035361	0.0408969440015218	0.672312518714107	-4.29364214291962
Q9NR56-1	MBNL1	0.15621076718179	2.20983148832763	1.69928787610869	0.1429168665014	0.802001738429253	-4.29404170120664
P16220-1	CREB1	0.076280824979492	3.36050816474092	1.95748159491076	0.100700649359708	0.777418231545286	-4.29417866595414
O94915-1	FRYL	0.0495273089007508	3.31868768840003	2.25033336970236	0.0678493862746578	0.727771020609183	-4.2969439099882
Q96QK1	VPS35	-0.0402847275463237	3.23827064268088	-2.43174913776472	0.0532970907833129	0.718556011495079	-4.29750831684946
Q8WXW3	PIBF1	0.0702376762600102	3.28221565806435	2.28988205467788	0.0643544394970192	0.721248879242078	-4.29799021747019
O60563	CCNT1	0.0641564841929222	3.21379251985302	2.0669631095387	0.0868336109616987	0.75221525295928	-4.29801061391755
Q8N474	SFRP1	-0.0576346190253458	3.4380876323661	-2.1635669381944	0.0762292895438976	0.736243234475022	-4.29802742474985
Q9ULJ6-1	ZMIZ1	-0.0822346191965077	3.27857163719849	-1.88839890735815	0.110589279469128	0.777632288017464	-4.29886369534969
O60346	PHLPP1	0.0559502036761223	3.36977363755286	2.30712818558522	0.0628899609456087	0.721248879242078	-4.29964135543847
Q9BU40-4	CHRDL1	-0.116776497658102	3.44986796544128	-1.75482560338691	0.132557114930911	0.80153112064763	-4.29972111552362
Q8TD17	ZNF398	0.107675365359333	3.4174165056655	1.71245228358527	0.140391560920573	0.802001738429253	-4.30013668331396
Q13153	PAK1	-0.0600204139159343	3.3951641757354	-2.22595586669009	0.0701020313125894	0.727771020609183	-4.30050670762327
O15127	SCAMP2	0.12925038352765	3.18322151132953	1.71556226254783	0.139801396225925	0.802001738429253	-4.30132942328581
P07196	NEFL	0.132332510747897	2.38289422018204	1.74533467456909	0.134273604321298	0.80153112064763	-4.3016771496053
Q9UH17-1	APOBEC3B	-0.10783393574225	3.24914123167559	-1.91659876860051	0.106439373011005	0.777632288017464	-4.30698351587893
Q13510-2	ASAH1	-0.0768410976418144	3.24618119342295	-2.09497309798176	0.0836108754040796	0.745488057719842	-4.30856360249866
P0CAP2-1	POLR2M	-0.0764649671168421	3.37839842562043	-1.8834383743217	0.111335949488794	0.777632288017464	-4.31219107935405
Q9UI36-1	DACH1	0.223233759884651	2.06097980374991	1.68088087040258	0.146522507103807	0.802001738429253	-4.31398085617171
Q9P2R7	SUCLA2	-0.118827441828939	3.30430411959331	-2.2583068950679	0.0671291001891496	0.727771020609183	-4.31484413271077
Q10469	MGAT2	0.0914381776859173	3.20648535039502	2.03900881222135	0.0901772830224291	0.752818406254708	-4.31847848894029
Q9UBB5-1	MBD2	0.146806638733129	2.68065819962176	1.66540567074166	0.14962241340461	0.806678254139263	-4.31873517846384
Q9BWT3	PAPOLG	0.0436546093194549	3.36982267037776	2.22775532231519	0.0699331108253126	0.727771020609183	-4.32162999593196
Q9H115	NAPB	0.1213830067448	3.27458334448816	1.8097416420662	0.123043161258232	0.793913864270319	-4.32175719785813
O43505	B3GNT1; B4GAT1	0.139535370563244	3.1791852285704	1.66042045918506	0.150634554690893	0.80860154166264	-4.32234403066925
Q9Y676	MRPS18B	-0.154334906296233	3.30856852761675	-1.88746475763419	0.110729503760017	0.777632288017464	-4.32476016649513
Q8NHQ9	DDX55	0.0531276697166626	3.32640881899738	2.06685038743987	0.0868468352698063	0.75221525295928	-4.32484103069787
Q16537	PPP2R5E	-0.0635561206420359	3.38377408650516	-2.11844093318766	0.0810056929240397	0.745488057719842	-4.32499605243246
Q14141-1	SEPT6	-0.078556350835979	2.90801726338104	-1.95208992509998	0.101439167955757	0.777418231545286	-4.32735094691214
O00311-1	CDC7	0.0593154111501156	3.37174860805319	2.03948531536439	0.0901191955174708	0.752818406254708	-4.32786708081917
Q9NP79	VTA1	-0.0608507278301997	3.28626257040712	-2.22227888479759	0.0704485256691987	0.728372647599148	-4.32843425176524
P35612-1	ADD2	-0.0537132719871356	3.42554593105525	-2.31885159009728	0.0619144642606453	0.721248879242078	-4.33010733896846
Q08AN1	ZNF616	0.106342937429325	3.41093575873471	1.756193828468	0.132311456107701	0.80153112064763	-4.3312798862629
Q9NRW7	VPS45	-0.0525289630535769	3.28449941897662	-2.14806047976197	0.077836815971654	0.737239570536456	-4.3314978539362
O95758-4	PTBP3	0.0622665348321822	3.3866521220495	2.01288090154195	0.0934217287140122	0.762799297725153	-4.33189487799497
P22695	UQCRC2	-0.133345585282657	3.27813886940005	-2.2705541789601	0.0660382856385854	0.727771020609183	-4.33217344646069
P62273-2	RPS29	-0.105218221290524	3.3653873256268	-1.99312553542227	0.0959538380460114	0.766831089051041	-4.33219228088159
Q96DX4	RSPRY1	0.109057386801207	3.31379613330552	1.75502459223146	0.132521359389665	0.80153112064763	-4.33233032965972
Q9NZ71-2	RTEL1	0.0822356898958296	3.26989953325109	1.78367251446257	0.127471995611966	0.798690677216784	-4.332437544456
Q8WWN8	ARAP3	-0.0621747679409754	3.43501140147566	-2.18861785820927	0.07370468629072	0.734642875539009	-4.33318655555115
Q9UDT6-1	CLIP2	-0.068108005269679	3.40357294781752	-2.43076121926185	0.0533667364774836	0.718556011495079	-4.33322637455667
Q9BRJ7-1	NUDT16L1	-0.0831750003246765	3.3424083546829	-1.78344124007171	0.127511986296342	0.798690677216784	-4.33365978937907
Q9BRD0	BUD13	0.0506534240922219	3.36551688072977	2.18833799728754	0.0737324053916888	0.734642875539009	-4.33405063339727
Q9H2F5-2	EPC1	0.0666148949220667	3.37132547768942	2.02312309407298	0.0921359071221693	0.760889859463168	-4.33406033791064
Q9UH65	SWAP70	-0.0493441342035204	3.38132203459531	-2.29150606214992	0.0642150207872239	0.721248879242078	-4.33608324341373
P49759-3	CLK1	0.0931240956456133	3.32681978350906	2.05194256550493	0.0886141357946887	0.75221525295928	-4.33735494565177
Q9H7F0-1	ATP13A3	0.102454701912952	3.392721138862	1.91681483001355	0.106408191097603	0.777632288017464	-4.3375647229535
Q8N1F7-1	NUP93	0.0590847051708842	3.35341097401705	2.68481084966272	0.0382844045523303	0.66660007029301	-4.34118711758638
P51810	GPR143	0.125961845855297	3.46516867673689	1.65426729761838	0.151893005311784	0.80923621918044	-4.34135716676145
Q9NY12-1	GAR1	0.134550039306594	3.34373113738615	1.98690370081326	0.0967657131210635	0.76908064873031	-4.34223655808157
P46020-1	PHKA1	0.0757685792010619	3.05187840491291	1.92174693200147	0.105698894964063	0.777632288017464	-4.34229136441216
P98153-1	DGCR2	0.173097306476224	3.40142699699345	1.66385992184426	0.149935535127213	0.807798753859538	-4.34317680765001
Q9UFN0	NIPSNAP3A	-0.107992827635526	3.16631272840114	-1.86533759213329	0.114103741867248	0.777632288017464	-4.34707856610535
P14921-3	ETS1	0.114799432330071	3.40034067266281	1.73052417540131	0.13699602814443	0.802001738429253	-4.34789488151082
Q9UQ16-4	DNM3	0.160391723569874	3.28066546754791	1.63904065418861	0.155051211549194	0.809242066405688	-4.34929693697161
Q9H967	WDR76	0.0936458648856994	3.25363287524021	2.10305535687203	0.0827040401146179	0.745488057719842	-4.35065840610607
Q96Q45-3	TMEM237	-0.166615152391962	3.34236479014769	-1.62861995292657	0.157249178855779	0.809242066405688	-4.35171386484425
Q96F45	ZNF503	0.194406178894426	1.08849465231143	1.69491474004154	0.143765558088045	0.802001738429253	-4.35509260131182
Q9Y4F9	FAM65B; RIPOR2	0.12859546160078	3.24321405891661	1.70386387796176	0.142034054892592	0.802001738429253	-4.355601652655
Q8NFM7-1	IL17RD	-0.110342268990036	3.44654163532888	-1.79376427681991	0.125739047722888	0.795679893814408	-4.35650828479549
P40123	CAP2	-0.0518775448262003	3.29163198288951	-2.13558325732737	0.0791557807018304	0.742399938318389	-4.35702529660929
Q5TB80	KIAA1009; CEP162	0.160604472585604	3.37724268903707	1.83178048941669	0.11941869880407	0.792543475107983	-4.35728892973932
Q9UHV7	MED13	0.0663999646569679	3.25011636855021	1.87058458134071	0.113294389084708	0.777632288017464	-4.35822604393657
O43678	NDUFA2	-0.0969088625551889	3.30250209799386	-1.80327302317573	0.124127627891136	0.793913864270319	-4.3584065526033
Q05682-1	CALD1	0.10016344193462	3.43045174970005	1.67154184810408	0.148385677428763	0.804856446452626	-4.35876141767872
Q9H9E3-1	COG4	0.060995462697838	3.25251260107011	2.06229135001966	0.0873834287221415	0.75221525295928	-4.35898511189393
P49760-1	CLK2	0.0845380606820281	3.34284832217628	1.73874618420866	0.135478039505918	0.802001738429253	-4.35900710768091
Q9NUS5	AP5S1	0.135495421472632	3.30000494466378	1.60820538807671	0.161642681517891	0.809242066405688	-4.35927539536966
Q9NR50-1	EIF2B3	-0.0589074603205335	3.21397493961144	-2.25891403669277	0.0670745828858821	0.727771020609183	-4.36370646798978
Q8N6N3	C1orf52	-0.117350661966463	3.21479242852425	-1.90006323728415	0.108853332905003	0.777632288017464	-4.36519623338549
Q8IVU1	IGDCC3	0.113672181465522	3.3882887793344	1.64926230788269	0.152924157107751	0.809242066405688	-4.36533598213908
Q9UKU7	ACAD8	-0.10822253602079	3.3482085520504	-2.17031188728072	0.0755408330666845	0.736243234475022	-4.36626908078228
Q13370	PDE3B	-0.196431236382885	3.34175033970383	-1.66631390087206	0.149438730488328	0.806678254139263	-4.37017548869584
O95456	PSMG1	-0.0664302031304048	3.31115903299564	-2.02079429737748	0.0924266706563653	0.761651361198319	-4.37071893580573
Q96IW2	SHD	-0.35437241414088	2.73531649637142	-1.65194328852201	0.15237096640841	0.809242066405688	-4.37120588922813
P04637	TP53	0.190015095094235	1.66931228585704	1.96976323277607	0.0990386897580682	0.772540300044155	-4.37343879891
Q96H22-3	CENPN	0.0673286061195843	3.26968583019201	1.8174071735685	0.12177023523756	0.793913864270319	-4.37467341449374
Q13155	AIMP2	-0.0490869720369028	3.3146261694187	-2.23369886172632	0.0693781839707912	0.727771020609183	-4.37597326044322
Q9H6R4-1	NOL6	0.0580017791992567	3.38132882144669	2.332370464883	0.0608092840061978	0.721248879242078	-4.37682308074797
P62854	RPS26; RPS26P25; LOC101929876	0.166100289062439	3.39511139167817	2.08126404464842	0.0851725301005799	0.750809386041796	-4.3810479747964
Q96DT6	ATG4C	-0.0825625351545959	3.2113789761968	-1.89058165740996	0.110262325013487	0.777632288017464	-4.38112953597135
O00203-1	AP3B1	-0.0479520495323417	3.32714781400138	-2.37923258861419	0.0571363890910993	0.719917861872589	-4.38133067495453
P78318	IGBP1	-0.106593952880649	3.29615076711486	-2.00368909626243	0.0945912823321269	0.764153550100263	-4.38157679842814
Q5TBB1	RNASEH2B	-0.0812238991892583	3.30008797356057	-1.97532048039074	0.0982958618841055	0.771880054810092	-4.38185101219236
Q86XK2-5	FBXO11	0.0582658274457478	3.33931878954956	2.01542488235642	0.0931006516864625	0.762799297725153	-4.38303587719117
O00299	CLIC1	-0.104439825551254	3.22407669959723	-2.37508781622318	0.0574516040452961	0.719917861872589	-4.38358707196392
Q9H9Y6-3	POLR1B	0.0346284868697662	3.35686914525457	2.41973127327063	0.0541509035657059	0.719760399457179	-4.3841033999428
Q15375-1	EPHA7	0.169065532443295	3.22737036924932	1.57232061311835	0.169653513950593	0.819635868406138	-4.38495357280519
P10412	HIST1H1E	-0.115241980065638	3.38235750290487	-1.96469155216334	0.0997215905829287	0.773573349800029	-4.38502046478107
Q15118	PDK1	-0.117094659790944	3.01881732144165	-1.94885146322095	0.10188539090921	0.777496785576642	-4.38532461035954
O75530	EED	0.0558175056797378	3.26731554956315	2.24585168800757	0.0682577803111781	0.727771020609183	-4.38577495107958
P38117	ETFB	-0.118972567522343	3.29259906021703	-2.16208985056933	0.0763809225882511	0.736243234475022	-4.38676143306517
Q9Y2L8	ZKSCAN5	0.285948977707905	3.39722790982468	1.71214438211197	0.140450122576097	0.802001738429253	-4.38704705443963
P52737	ZNF136	0.130163019710998	3.3853567851539	1.60041276502262	0.163350778262614	0.809242066405688	-4.38747055789701
Q96QE3-1	ATAD5	0.1002077171712	3.38050053274918	2.16088232704748	0.0765051154118981	0.736243234475022	-4.38768294238057
P43405-2	SYK	-0.0913362916780728	2.72839658493782	-1.68837453212027	0.145044015904951	0.802001738429253	-4.38779348905739
P10070-5	GLI2	-0.142264953765512	3.3303061913948	-1.57033261535155	0.170108262090832	0.820689972741255	-4.38894500431909
Q08211	DHX9	0.0416530591613142	3.34758097314655	2.96873965824475	0.026674537867303	0.658029114205621	-4.38902348176823
P28290	SSFA2	-0.115354060007096	3.12970400363535	-1.63713340841913	0.155451257834998	0.809242066405688	-4.39012717194604
P49247	LOC101060545; RPIA	0.0587190800855373	3.25932924761737	2.06667839928857	0.0868670165268064	0.75221525295928	-4.39232733342745
Q15121-2	PEA15	-0.0826196391652716	3.24123391314811	-1.81424518222977	0.122293713618891	0.793913864270319	-4.39261167302413
P14866	HNRNPL	0.100898872180949	3.37518748874984	2.94870322374703	0.0273532759472314	0.659251084934869	-4.39313459007352
O95155-4	UBE4B	-0.0499620858663245	3.37264150478527	-2.42033548316155	0.0541076330543478	0.719760399457179	-4.39567146033029
A6NKF1	SAC3D1	0.144137995975189	3.24057830987649	1.72238284776784	0.138515601433482	0.802001738429253	-4.3976803560335
P21283	ATP6V1C1	-0.0678006204681842	3.34529057810759	-2.07839259025497	0.0855034137875478	0.75141144396113	-4.40042531064712
Q00013-1	MPP1	0.0693581477695123	3.01058241238505	2.05897445042351	0.0877759622600353	0.75221525295928	-4.40064054246993
Q9NXV6	CDKN2AIP	0.0638707746443691	3.30230395608761	2.13281958541993	0.0794510435333342	0.743274667879694	-4.40066800800711
Q13487	SNAPC2	-0.0896734289111508	3.33323742354541	-1.63949470051601	0.154956122040506	0.809242066405688	-4.40094731751793
Q86XJ1	GAS2L3	0.138475695307125	3.39152516873355	1.54328077032513	0.176413156384841	0.830066782329383	-4.40104786569244
Q96S90-1	LYSMD1	0.134378726687462	3.25658070199084	1.68748588967281	0.145218579815152	0.802001738429253	-4.40138496683587
Q9NY74	ETAA1	0.124888680714319	3.32683925509806	1.55075234885568	0.174649851866346	0.827618075057818	-4.40148418630974
P04066	FUCA1	0.0696957016221869	3.035329903705	1.86320517712774	0.114434323937035	0.778516546570453	-4.40283080798793
Q7Z2W4-3	ZC3HAV1	0.240579184872018	3.44414649872257	1.69526252174308	0.143697884268159	0.802001738429253	-4.40337905270773
P61204	ARF3	0.0406304166505407	3.23754300534614	2.22867701660891	0.0698467530263874	0.727771020609183	-4.40600438610695
Q9C099-1	LRRCC1	0.141576119326613	3.34483741485732	1.56910557188278	0.170389526064785	0.820689972741255	-4.40916041837806
O60507	TPST1	0.150533139968645	3.29603697375798	1.67250956097109	0.148191547613025	0.804618225964	-4.40963229898472
Q76G19	PDZD4	-0.112690114355657	3.40521489966651	-1.78437406868736	0.127350762812508	0.798690677216784	-4.41113751106586
Q9ULL8-1	SHROOM4	0.110476137320244	3.36531317903674	1.60255779015134	0.162878876295653	0.809242066405688	-4.41143773021582
P47712	PLA2G4A	0.100851564520426	2.50779252173571	1.63322325910274	0.156274541945149	0.809242066405688	-4.41250214462193
Q96EA4	SPDL1	0.0877562392085069	3.28782367011718	2.03621158489815	0.0905190494562941	0.754850160248574	-4.41361165768816
Q96B54	ZNF428	-0.118904074567482	3.3031864857509	-1.581929053339	0.167471970879505	0.817331399864859	-4.41448918616195
Q9ULL5-3	PRR12	0.0389603884377363	3.39030024642643	2.28315449241226	0.064935381039235	0.724105004844492	-4.41461647989976
Q96EX1	C1orf212; SMIM12	-0.0642304341391954	3.35524751079355	-1.8072242148606	0.123464084037639	0.793913864270319	-4.41560230160394
Q96BZ9-3	TBC1D20	-0.132426097646665	3.38996232513854	-1.61924212204888	0.159252914911345	0.809242066405688	-4.41589562084635
Q9HB19	PLEKHA2	-0.0889634298596771	3.19009544070181	-1.73393758352119	0.13636380605644	0.802001738429253	-4.41758675742968
Q96MT3	PRICKLE1	0.0848858106255494	3.39755123403493	1.72530877945834	0.137967580717029	0.802001738429253	-4.41877737436913
O60437	PPL	-0.0428365350135859	3.47209592764045	-2.16622837655564	0.0759568624690239	0.736243234475022	-4.41885356293636
A7E2V4-2	ZSWIM8	-0.066242446937472	3.31188559070335	-1.85167432899103	0.116238618129471	0.780212316963518	-4.42123492660412
Q7L0J3	SV2A	0.0792248820981256	3.43553288001297	1.82166809662735	0.121068354854991	0.793913864270319	-4.42140086104197
Q7L4P6	BEND5	0.0981165857754261	3.33608629863911	1.58615970028168	0.166519973682989	0.814843634213137	-4.42140732681458
O43324-1	EEF1E1	-0.103456187751807	3.26829898121595	-1.88604272191743	0.110943307547157	0.777632288017464	-4.42148287462844
Q6IE81-1	PHF17; JADE1	-0.0541815645980212	3.39196479247539	-2.20107016733971	0.0724822393885764	0.734642875539009	-4.42211366870477
Q8WZ73-1	RFFL	0.118602564460054	3.32824799046356	1.52733970053606	0.18023203141648	0.831473328338687	-4.42237955287125
O00193	C11orf58	-0.0773363310755081	3.29271240107714	-2.16384725261821	0.0762005486336894	0.736243234475022	-4.42263258897292
Q5T1V6	DDX59	0.0689350635230171	3.18360895174357	2.00229756648541	0.0947696364913012	0.764153550100263	-4.42271367483544
Q7LBR1	CHMP1B	0.0736705816670753	3.38729967164947	1.96863600410633	0.0991900591278517	0.772540300044155	-4.4250259182298
Q5VVQ6-1	YOD1	0.309118628363114	3.1011558837379	1.57698698957227	0.168590661440816	0.819430384288872	-4.42528775832732
Q9UJY5-6	GGA1	-0.0744001995453343	3.21044448654987	-1.8223530396147	0.120955904491463	0.793913864270319	-4.42532129477964
P09493-7	TPM1	0.129281454070913	3.44947010965493	1.95632491560722	0.100858623478858	0.777418231545286	-4.42612965108024
Q6NUK4	REEP3	0.138459330811909	3.38077938312611	1.55936570486765	0.172637927743986	0.823168540492146	-4.42754506007941
Q96FZ7	CHMP6	0.16028483648846	3.38074968727547	1.80982446995179	0.123029336435062	0.793913864270319	-4.42818703823409
Q8NCD3-1	HJURP	0.0642432977598779	3.33549301592163	1.81339885306633	0.12243420614098	0.793913864270319	-4.42924474178652
Q03468	ERCC6	0.0912998702233587	3.30091703406607	1.62843417273087	0.157288636412863	0.809242066405688	-4.42952403887605
O15235	MRPS12	-0.0885360913791561	3.32136530195866	-1.82334990224543	0.120792430841811	0.793913864270319	-4.4313766201814
Q9BQ75	CMSS1	0.0615726930017561	3.28739249267821	1.90062168507689	0.108770913539639	0.777632288017464	-4.43203272546045
Q6JBY9	RCSD1	0.118186748708218	1.87132587125435	1.75466168969141	0.132586575107422	0.80153112064763	-4.43330360800232
Q9Y6X8	ZHX2	-0.067074289498199	3.37209504629931	-2.10634364171253	0.0823379994978228	0.745488057719842	-4.43331213379085
Q9NP58	ABCB6	0.0994762010817895	3.31223346557774	1.79934164612879	0.124791363495268	0.793913864270319	-4.4334766921069
Q6P6C2-2	ALKBH5	0.0750189932499031	3.0403082706898	1.7156983080691	0.139775635210327	0.802001738429253	-4.43502145628669
P49755	TMED10	0.0745043483586473	3.33972331172318	2.15634710276154	0.0769734324770842	0.736243234475022	-4.43615993690971
P04424	ASL	-0.0641105082028784	3.25742011034886	-1.9506604974615	0.10163588193951	0.777418231545286	-4.43746456174855
Q9BR76	CORO1B	-0.058699053584368	3.35908021830665	-2.20608281242983	0.0719961194927322	0.734642875539009	-4.43761868999064
Q86TU7	SETD3	-0.0688402982360953	3.3413704278338	-2.09888242657971	0.0831709732227227	0.745488057719842	-4.43789285785752
O94885	SASH1	-0.0577577447465913	3.43911215007845	-2.01231086059509	0.0934938288035091	0.762799297725153	-4.43957450111199
Q8NF99-1	ZNF397	0.129512839974385	3.31617585837607	1.5122917854355	0.183908775166932	0.835869741161555	-4.4398527247737
Q9H9C1-1	VIPAS39	0.0552789383066923	3.34662846444712	1.97661557926594	0.0981235635371891	0.771880054810092	-4.43995344182774
Q9UMS0	NFU1	-0.0990402339433055	3.31227556282926	-1.66626978869926	0.149447646780279	0.806678254139263	-4.44067777632702
Q4G0J3-3	LARP7	0.0699414345236197	3.1726955586261	2.12292850814591	0.0805171412517288	0.745488057719842	-4.44123217185539
Q7Z3T8	ZFYVE16	0.0445929857630423	3.27140918572521	2.22031122446559	0.0706346780257777	0.728372647599148	-4.441757660898
Q9Y4G8	RAPGEF2	0.054340942446006	3.36726999287985	2.04311364888509	0.0896781432686998	0.752260118983765	-4.44214924299348
Q3V6T2-3	CCDC88A	0.0557427672897295	3.30156505284433	2.41691685644751	0.0543529417437409	0.719760399457179	-4.44339110772842
Q9Y2G3	ATP11B	0.146228593325033	2.95167824760437	1.54102870906481	0.176947961214617	0.830066782329383	-4.44477286763699
Q9Y3B2	EXOSC1	0.0818419017326456	3.34323916982604	1.98274430064638	0.0973123629962176	0.769921363723944	-4.44499773919104
Q9BX10	GTPBP2	-0.0617379116875017	3.27925305788227	-1.8926295724804	0.109956451953097	0.777632288017464	-4.44504396617678
Q8NBT0	POC1A	-0.0701610001625018	3.31120352957378	-1.78323927577403	0.127546919016578	0.798690677216784	-4.44528068999909
Q9P086	MED11	0.0706054991192402	3.08948279705149	1.76407344232075	0.130905433692377	0.80153112064763	-4.44581845340311
Q9H4B6	SAV1	0.0686962873106836	3.36315917300609	1.71997395183348	0.138968386948297	0.802001738429253	-4.44683719389642
Q9Y2L9-2	LRCH1	0.067551901267318	3.2605876164619	1.72515871815678	0.137995634972086	0.802001738429253	-4.44793734468781
P36873-2	PPP1CC	-0.0729893952575242	3.29316255628026	-1.71922172677631	0.139110075691902	0.802001738429253	-4.4480627769574
O43264	ZW10	-0.0407224351995368	3.32258358409267	-2.30957075546962	0.0626853927019138	0.721248879242078	-4.44828490931583
Q8NI36	WDR36	0.0403089035086677	3.3535277398505	2.33958192874941	0.0602282487556431	0.721248879242078	-4.44863498812883
Q8N163-1	KIAA1967; CCAR2	0.0525252260934798	3.32755453378426	2.53966665099968	0.0462412708804506	0.697893294958011	-4.44950370599066
Q9Y6I4-1	USP3	0.057614021957875	3.33404734739621	1.94549536707922	0.102349922058729	0.777496785576642	-4.45065712651957
P28074-1	PSMB5	-0.134962611933497	3.3218908706198	-1.52476763752258	0.180855504746732	0.832068073496033	-4.45138784614565
Q9H6K1	C6orf106	-0.0941040543479462	3.32619708627402	-1.76550846572846	0.130650965304753	0.80153112064763	-4.45240130217747
O75419-3	CDC45	0.0517929660111132	3.09349069467838	1.93355708254673	0.104019807172333	0.777632288017464	-4.45334266124285
Q9H9Y2	RPF1	0.131937840087742	3.38990293659036	2.04798912284667	0.0890889715579948	0.75221525295928	-4.45471649445509
P16152	CBR1; SETD4	-0.0572693354753146	3.22940236853487	-2.28720165890902	0.0645852424451652	0.721248879242078	-4.45574215717321
Q9NUG6	PDRG1	-0.10537698248268	3.24023362915921	-1.72455354609041	0.13810882998121	0.802001738429253	-4.45574279136805
Q9NX05-1	FAM120C	0.0972966613405859	3.3525557847295	1.56625686299485	0.171044225204357	0.821211202472615	-4.45774844179471
P51790-2	CLCN3	0.0803149896364524	3.19750990609462	1.74440932659185	0.13444212710924	0.80153112064763	-4.45775550735192
Q8N3P4-1	VPS8	-0.0545365888234017	3.31960147929527	-1.95444951479252	0.101115291850189	0.777418231545286	-4.45801726213007
P32119	PRDX2	-0.109958118766186	3.3154131834786	-2.11035252626791	0.0818940033815447	0.745488057719842	-4.45873165587411
P46777	RPL5	0.0273493552836401	3.34594714049962	2.71318410193786	0.0369084437377496	0.66660007029301	-4.45892886825903
Q9GZN2-1	TGIF2	-0.094453646564669	3.37313321489863	-1.54304489418622	0.176469098537626	0.830066782329383	-4.46086906599887
Q96FA3	PELI1	0.102184002918015	3.36145125011997	1.53432597163511	0.178548819679005	0.830173883855703	-4.46140182916632
Q7Z408-4	CSMD2	0.158045046419127	3.43573555332529	1.48865080858656	0.189828576247009	0.842458239693728	-4.46140413586558
Q9NXX6	NSMCE4A	0.0742579061826767	3.2544971054057	1.73464765541737	0.136232649664294	0.802001738429253	-4.46254062980504
P09496-2	CLTA	-0.0807452292387283	3.30029455150779	-2.03060744225158	0.0912077610706221	0.75618465262235	-4.46291753834383
Q8N960	CEP120	0.0563309526786461	3.27297435318779	1.87374938586436	0.112809003179213	0.777632288017464	-4.46294470604953
Q8TCA0-1	LRRC20	0.137289887158403	3.30664549130186	1.80370871257313	0.124054286698091	0.793913864270319	-4.46323374869923
Q14681	KCTD2	0.0892651335164079	3.37766769076114	1.55645691648343	0.173314883080874	0.824858426176466	-4.46423973732986
Q13164-1	MAPK7	0.0753394124923576	3.32464306249782	1.86516075163085	0.114131120478059	0.777632288017464	-4.46522569233954
Q02539	HIST1H1A	-0.132251623352466	3.44730160082083	-1.76021452680138	0.131592156373581	0.80153112064763	-4.46718901768865
Q9NQC8-2	IFT46	-0.101588718821354	3.24175618959759	-1.56452433696919	0.171443574875262	0.821444232041286	-4.46764591519267
P12270	TPR	0.0663353077718191	3.3324809379855	2.90197787262136	0.0290104967711714	0.659251084934869	-4.46979933706776
P15291	B4GALT1	0.119227454776241	3.2627012583663	1.53069139962025	0.179422631350374	0.830969706307806	-4.4705328738595
Q96NC0	ZMAT2	-0.0717760702249081	3.29688231154038	-2.0514987042722	0.0886673170201575	0.75221525295928	-4.47142841230759
Q5T3F8	TMEM63B	0.148669257596734	3.33753584335214	1.5880040271424	0.166106582663256	0.814843634213137	-4.47170686916233
Q9H7N4	SCAF1	0.0674518089569607	3.339437255676	2.08209774467349	0.0850767080444439	0.750809386041796	-4.47481034302271
P25789	PSMA4	-0.0388130065857338	3.3296792895265	-2.34555456494422	0.0597514535492832	0.721248879242078	-4.47765690992766
P26572	MGAT1	0.0805182168629714	3.24410694366341	1.78214489222115	0.127736373950077	0.798690677216784	-4.47769392030633
Q8IWJ2	GCC2	0.0541880642348813	3.33095948216559	2.5288053339672	0.0469041256759095	0.701085908826398	-4.47832616210496
Q96IZ5	RBM41	0.0720194276968964	3.38860011242528	1.67003123874629	0.148689211283655	0.805609907463416	-4.47843209614983
Q7Z3D6-2	C14orf159; DGLUCY	-0.168454991500647	3.29225207477582	-1.66035565444609	0.150647755662051	0.80860154166264	-4.48272193233164
Q5T7W0-2	ZNF618	0.061060929673236	3.3640626174168	1.96529219344699	0.0996404653006962	0.773573349800029	-4.48282383123239
Q9NYK5-1	MRPL39	-0.0866789205699775	3.30636913307391	-2.19177029702999	0.0733931971958552	0.734642875539009	-4.48482276385652
P07992-3	ERCC1	0.0719452610959604	3.21699659579168	1.68042274623611	0.146613370094042	0.802001738429253	-4.48889219103722
Q8N0W4-2	NLGN4X	0.103504661571501	3.47106357002201	1.86840718114365	0.113629553505325	0.777632288017464	-4.4909709019135
Q6NT76-5	HMBOX1	0.166465741044973	3.30090465447759	1.43205948774392	0.204733724447356	0.844769364487011	-4.49172102538883
Q14147	DHX34	0.0427854831599731	3.33981166425885	2.18121143057633	0.0744419262265265	0.736243234475022	-4.49244285158011
Q9BTL4	IER2	0.650545665217381	3.65056375328422	1.41029702219679	0.210750323850057	0.84875406014574	-4.49276727653381
Q9H9K5	ERVMER34-1	0.243522562403508	3.47795337992881	1.53491671947915	0.178407176386517	0.830173883855703	-4.49277073714905
Q8NI22	MCFD2	0.155329812496512	3.20151315937455	1.55341701690447	0.174025057293921	0.82567732811315	-4.49412785311729
Q02750	MAP2K1	-0.059439797664399	3.26243226567198	-2.18985026143059	0.0735827505324059	0.734642875539009	-4.49451280454324
Q9BR77-1	CCDC77	0.0890761337657423	3.3478090321527	1.80820041417952	0.123300690220027	0.793913864270319	-4.49466165498853
O43181	NDUFS4	-0.113327380308554	3.28671511063295	-1.52114282765242	0.181737637460488	0.833216346497368	-4.49672235230885
P50548	ERF	-0.122905305418765	3.40248196393004	-1.7432448245527	0.13465450052027	0.80153112064763	-4.49732338574084
P62277	RPS13	0.0466058566530445	3.38540716588494	2.1060087698496	0.0823751997605395	0.745488057719842	-4.49757124736392
Q9H0N5	PCBD2	0.0762670708070249	3.31953299746057	1.61676726984182	0.159785808455379	0.809242066405688	-4.4977645641862
O75165	DNAJC13	0.0444526833486747	3.26444659562513	2.36161496369527	0.0584889758696026	0.719917861872589	-4.49865581551638
Q16206	ENOX2	0.249150649349733	3.38989201995723	1.6022808137951	0.162939736795938	0.809242066405688	-4.49970154786021
O15321-1	TM9SF1	0.118662898410881	3.15971154010047	1.69424515250414	0.143895938943916	0.802001738429253	-4.49972405945008
Q9NX63	CHCHD3	0.0780534146217091	3.29014150709899	2.073842286271	0.0860304644046198	0.75221525295928	-4.50235221560687
Q9NRP7	STK36	-0.119790444781606	3.40468773714778	-1.47152642411901	0.194228096071076	0.843632815050238	-4.50248995177393
Q9NUM4	TMEM106B	0.0946855242618968	3.29242746227118	1.70831374807888	0.141180699918096	0.802001738429253	-4.50356004978638
O94992	HEXIM1	-0.0764149869576204	3.34838969885913	-1.88366232673217	0.11130213068327	0.777632288017464	-4.50360689540569
Q7L590-1	MCM10	0.0778709972488902	3.31995974541591	1.62505005812968	0.158009060436278	0.809242066405688	-4.50564717687564
Q9UNM6	PSMD13	-0.0418758433938201	3.29931588353247	-2.34482346208002	0.0598096032808221	0.721248879242078	-4.50592075574894
P25440-2	BRD2	-0.043405532693219	3.23258731278559	-2.15182139672059	0.0774437291737933	0.736243234475022	-4.50660055688187
P35226	BMI1; COMMD3-BMI1	0.145979633303707	2.65560504161464	1.62754938101072	0.157476687302869	0.809242066405688	-4.50759160983785
P57764	GSDMD	-0.0583530144266334	3.29121562580438	-1.81058548412144	0.122902387707938	0.793913864270319	-4.50823367066035
Q9BYJ9-1	YTHDF1	-0.0660826203077423	3.36710163550665	-1.94188115352092	0.102852580514749	0.777496785576642	-4.50966358704997
O96018	APBA3	0.126737606277805	3.38304456210963	1.42800444385322	0.205842595545922	0.844769364487011	-4.51031006918102
Q96SI9	STRBP	0.062913571788616	3.37190793999466	2.33964628800142	0.0602230896575033	0.721248879242078	-4.51162848123658
Q86YD1-1	PTOV1	0.0739489377804386	3.35822339675041	1.60702161177849	0.161901045895495	0.809242066405688	-4.51533666556234
O75529-1	TAF5L	0.0615087028521563	3.29187306370131	1.89154748752303	0.110117963747043	0.777632288017464	-4.51625873676768
Q5J8M3-1	EMC4	-0.202668678155789	3.35730532660542	-1.47107924348342	0.194344255438593	0.843632815050238	-4.51682754244069
Q96IK1	BOD1	-0.0846426187195577	3.33087230885216	-1.73082937220174	0.136939383242559	0.802001738429253	-4.51683415600899
P07203	GPX1	-0.0660909232124628	3.36669706195916	-1.99853404831193	0.0952537316057288	0.764153550100263	-4.51701478366132
Q9Y508-1	RNF114	-0.0618786655188009	3.33466211525937	-1.94217118278161	0.102812151639527	0.777496785576642	-4.51743294972345
O15075-1	DCLK1	-0.0715570874868953	3.3974967540449	-1.91323653091297	0.106925800408002	0.777632288017464	-4.51840634123969
Q9BT09	CNPY3	-0.0948795912223385	3.32099041653305	-1.97531953952446	0.0982959871675521	0.771880054810092	-4.52008641779067
Q8NAX2	C1orf172; KDF1	0.069161954460497	3.44232410848038	1.63316567765653	0.156286697227369	0.809242066405688	-4.52041530298155
Q8WWZ3-1	EDARADD	-0.142170003055951	3.31022979123245	-1.43226719295147	0.204677076079478	0.844769364487011	-4.52066527013862
P56545-2	CTBP2	-0.0499937525986445	3.37339625456921	-1.9272529807793	0.104912699108486	0.777632288017464	-4.52156680024635
Q96SL8	FIZ1	-0.117387302481224	3.47998498022031	-1.44511540059498	0.201201125344823	0.844769364487011	-4.52174974530681
Q8ND83-1	SLAIN1	0.0717959190368908	3.16664422956844	1.70530185514455	0.141757741735984	0.802001738429253	-4.52187238626763
P38935	IGHMBP2	0.0787607607232146	3.29149245092019	1.63756078136555	0.155361529213022	0.809242066405688	-4.52189949561219
Q9H582-1	ZNF644	0.0704268201432171	3.38632796524439	2.15507056438215	0.0771057857788082	0.736243234475022	-4.52327398864997
Q96EN8	MOCOS	-0.0675377952751366	3.33416991832257	-1.62211814235457	0.158635795692799	0.809242066405688	-4.52400994080499
Q99797	MIPEP	-0.10280351141308	3.32837070515202	-2.06154060608998	0.0874721163354737	0.75221525295928	-4.52472029692005
Q8WUI4-5	HDAC7	-0.0606980769110974	3.34700850946652	-1.87428330575783	0.112727321971009	0.777632288017464	-4.52571391833178
Q93015-2	NAT6	0.14707686603946	3.14360149753549	1.34243198559558	0.230573817527924	0.863123154559365	-4.52610009752839
Q9UBK9	UXT	-0.0798355324892407	3.24047730569438	-1.65700233292002	0.15133237687787	0.80923621918044	-4.52628880165135
Q99519	NEU1	0.0791568224505411	3.34394584126733	1.75993344193984	0.131642316394518	0.80153112064763	-4.5274992506967
Q14764	MVP	0.325864416739428	1.41479933040586	1.82820474051116	0.119999439333468	0.793913864270319	-4.53007943929089
Q9Y5Z4-1	HEBP2	-0.0631720055176768	3.2335927792485	-1.76659976754134	0.130457775532317	0.80153112064763	-4.53040681844608
Q9UL41-1	PNMA3	-0.0876962538716783	3.40750425625322	-1.60683729186829	0.161941310298171	0.809242066405688	-4.53158457065782
Q9UKT9-1	IKZF3	-0.166052007125582	2.19260479806426	-1.35914216730374	0.225540485941258	0.860287105490515	-4.53335144580917
P16219	ACADS	-0.227510189729524	3.19910871263733	-1.59075481551795	0.165491845259484	0.814115969609144	-4.53381415011852
Q86V42-2	FAM124A	-0.0723177278126835	3.41680697189313	-1.60855908070251	0.161565563643674	0.809242066405688	-4.53525730463958
O75503	CLN5	0.0790429802076134	3.19410852113062	1.74718895970067	0.133936531660035	0.80153112064763	-4.53534398172661
Q7Z6I8-1	C5orf24	0.116651452288317	3.16825016694313	1.42813422448267	0.205807020224751	0.844769364487011	-4.53597949100523
Q9P2N2-1	ARHGAP28	-0.127207093293842	3.42540670885143	-1.51892581701822	0.182279175675111	0.833875202501698	-4.53632743476732
Q9BV40	VAMP8	0.100856561108267	3.28004913829966	1.51717230892456	0.182708578117531	0.833875202501698	-4.53745616874297
Q9UKV3-1	ACIN1	0.17297841187061	3.31794632230819	1.6844593491051	0.145814650842245	0.802001738429253	-4.53783933056838
P62308	SNRPG	0.0638370552126905	3.33616456563525	1.68847828543923	0.145023648089961	0.802001738429253	-4.53939773328853
Q6JQN1-5	ACAD10	-0.115848130552485	3.26046430984867	-1.34703279027209	0.229177893513633	0.863123154559365	-4.54293444380354
O75564	JRK	0.0783977887766557	3.34030653368416	1.50796973700885	0.184977854423153	0.837289520506358	-4.54331148949399
O75319-1	DUSP11	0.0698127007967239	3.32896678590688	1.67809282453028	0.147076331199096	0.802001738429253	-4.54419625668343
Q96NE9-1	FRMD6	0.107601510366447	3.27400913486579	1.3762752558746	0.220484039839443	0.858240323582177	-4.5447119597229
Q9NVI1-3	FANCI	-0.0526045915083057	3.25803141172057	-2.32532177444499	0.0613829079874819	0.721248879242078	-4.54636164415937
P48047	ATP5O	-0.105396312465605	3.32412483854337	-2.11473781326573	0.081411147667731	0.745488057719842	-4.54693339798981
Q00536-2	CDK16	-0.0691073943574303	3.34313680308302	-1.61146473807224	0.160933365063341	0.809242066405688	-4.54706271348109
Q6PI47	KCTD18	0.160112787904039	3.13182654196326	1.26178010424881	0.256323461575186	0.866252015734413	-4.54726679311067
O94766	B3GAT3	0.0923838748886709	3.17879572106628	1.62192871117965	0.158676371559364	0.809242066405688	-4.54742450153678
Q9BPW8	NIPSNAP1	-0.135322871311215	3.31580615253576	-2.06012425316507	0.0876396860124271	0.75221525295928	-4.54889367724871
Q5GLZ8-1	HERC4	-0.0458998448255472	3.32968558330711	-2.14054777252437	0.0786282335146218	0.740036484279522	-4.54895158551228
Q9Y618-1	NCOR2	0.0465390337405137	3.38934257430268	2.27148251874537	0.0659563623969517	0.727771020609183	-4.54939662749061
P57081-1	WDR4	-0.0877736028458525	3.27509523102655	-1.93248713167289	0.104170808109507	0.777632288017464	-4.5498984026896
P14543-1	NID1	-0.133130775381406	3.35013649681334	-1.57016366455326	0.170146962761079	0.820689972741255	-4.55157088225826
Q86W54-1	SPATA24	0.14985855581427	3.42357149901074	1.30794808808714	0.241284260297988	0.863518733536854	-4.55159885182781
Q9H008-1	LHPP	-0.0655187774606594	3.34333275064396	-1.61111265681035	0.161009842034702	0.809242066405688	-4.5519384325323
Q5U623	ATF7IP2	0.127081231345846	3.41421895060675	1.46873551007258	0.194954127552364	0.843632815050238	-4.55358929534409
Q8NB91	FANCB	0.0623851571352349	3.3311170929535	1.7122238225774	0.140435011017603	0.802001738429253	-4.5536033810605
Q9BS91	SLC35A5	0.111929107163586	3.29189224732636	1.3949830705628	0.215081659525795	0.853209147818975	-4.55491899283393
P00352	ALDH1A1	-0.102331468855297	3.35993291569275	-1.48524684626044	0.190695582165347	0.842458239693728	-4.55560684159376
O00220	TNFRSF10A	0.198536449592191	3.41031689899317	1.40102975982013	0.213361724011464	0.851702201542334	-4.55575760692047
Q7L099-3	RUFY3	0.0541375246399935	3.12525439914497	1.7791818968285	0.128250716004121	0.798703209709946	-4.55852346145853
Q96QR8	PURB	-0.0726038148345181	3.29515849944613	-1.92544789180991	0.105169790248035	0.777632288017464	-4.55881896668706
P10109	FDX1	-0.0821928185126795	3.30143889903681	-1.68156864277377	0.14638619952278	0.802001738429253	-4.55944153981709
Q2QGD7	ZXDC	-0.159875058516912	3.34747045874482	-1.49410021598952	0.18844830256083	0.842204768242397	-4.56100089794314
P50579	METAP2	-0.103451748789804	3.39768813569756	-1.87766520858941	0.112211322679161	0.777632288017464	-4.56161252635609
Q9UHI5-1	SLC7A8	0.10091648963429	3.45416986463638	1.77359325513511	0.129226431516813	0.80153112064763	-4.56165879292413
P53355-3	DAPK1	0.0484627598102326	3.39269177332166	2.17680966591998	0.0748837062998468	0.736243234475022	-4.56187086876229
O60513	B4GALT4	0.0970956753309057	3.37363816314485	1.78424570851162	0.127372935675785	0.798690677216784	-4.56239316133377
P16066	NPR1	-0.118912664212234	3.1560836353149	-1.45003188638686	0.199885622119021	0.844295969579547	-4.56248188739824
P36955	SERPINF1	-0.107521722157599	3.18213693194954	-1.39839022392225	0.214110955714949	0.851854060901406	-4.56271436023735
Q9H078-2	CLPB	0.083173101530268	3.23794949310654	1.99146715500229	0.0961695562709093	0.766957209678187	-4.56588900708229
P49748-3	ACADVL	-0.135884112328357	3.22431155089413	-2.25517703189916	0.0674108774414283	0.727771020609183	-4.56630790044857
Q9NRB3	CHST12	0.130244356170681	3.23630486070121	1.34459151737264	0.229917637350222	0.863123154559365	-4.56652542187083
O94886	TMEM63A	0.11709540294079	3.1886670966806	1.31841926249111	0.237985423256502	0.863123154559365	-4.56760382321365
O95721	SNAP29	0.0843239118266818	3.08508122402437	1.89333766674444	0.109850891022673	0.777632288017464	-4.56795338453374
Q8WUM0	NUP133	0.0426164141126904	3.35679252409519	2.45884325769769	0.0514241324616713	0.708615437025271	-4.56859337986024
Q9UPY8	MAPRE3	-0.111186219351214	2.892823725261	-1.34209603159296	0.230676050944515	0.863123154559365	-4.57031157184578
P52564-1	MAP2K6	-0.0554683832881626	3.30524057001785	-1.9299955315228	0.104523304723094	0.777632288017464	-4.57097168716501
P98170	XIAP	0.0528519148017446	3.31309355264141	1.97027022378957	0.0989706852541276	0.772540300044155	-4.57119647104963
Q96I76	GPATCH3	0.105762287717424	3.29535551103381	1.60106513691127	0.163207118505734	0.809242066405688	-4.57135111087986
Q8N0X7	SPG20; SPART	-0.0465999331319079	3.16588750073471	-1.99931797094031	0.0951526894487779	0.764153550100263	-4.57153825681436
Q9BV81	EMC6	-0.177231897588767	3.36606798725983	-1.48548478833715	0.190634856317119	0.842458239693728	-4.57193841207805
O14646	CHD1	0.0435771604730469	3.34727615161416	2.36535783640868	0.0581988170140487	0.719917861872589	-4.57217200718761
Q86YT6	MIB1	0.0571847123809394	3.30117627049327	1.95970697933952	0.100397422070876	0.777244220108738	-4.57238900937988
O75251	NDUFS7	-0.134765674560163	3.18167113069041	-1.6344555732091	0.156014623095365	0.809242066405688	-4.5746424553755
Q9UJT0	TUBE1	0.101720279881417	3.23962877478482	1.32487664576159	0.235971429276243	0.863123154559365	-4.57491348979416
Q9Y3P4	RHBDD3	-0.12500683929927	3.39770011759371	-1.26568370510524	0.255020256929755	0.866252015734413	-4.57512232629952
Q96T37-1	RBM15	0.0549955077262026	3.34665227417696	2.24260691415002	0.0685550634786989	0.727771020609183	-4.57568172169202
Q9NQT5	EXOSC3	0.0509971941599577	3.35478048622564	2.04804953832992	0.0890816956480686	0.75221525295928	-4.57823764771282
Q96FE5	LINGO1	-0.0966960633593314	3.45219255383225	-1.43859477664564	0.202958291205776	0.844769364487011	-4.57840238505192
Q7Z589-5	C11orf30; EMSY	0.0348304699783734	3.35648246944829	2.15026349732713	0.0776063090009457	0.736875745860464	-4.57850936301945
Q8WWV3-1	RTN4IP1	-0.0988651113689674	3.29513151629991	-1.73875288122872	0.135476809842839	0.802001738429253	-4.57880722499579
Q9BUE6-2	ISCA1	-0.106536231850804	3.33443804145363	-1.76681631560647	0.130419474306753	0.80153112064763	-4.5797090722323
Q92834	RPGR	0.0797770461622363	3.35726128794157	1.73409682883734	0.136334381270319	0.802001738429253	-4.58013712729158
Q8TDY4-3	ASAP3	-0.0507433614689607	3.40394355768282	-2.01578772364499	0.0930549492428471	0.762799297725153	-4.58135711209391
Q8WV60	PTCD2	-0.101035536031543	3.31090943710868	-1.47367456529018	0.193671002843823	0.843632815050238	-4.5819151968474
P22234	PAICS	-0.0887535934111389	3.34414548877353	-2.50881635217055	0.0481506826839682	0.701085908826398	-4.58215466116632
P26010-1	ITGB7	0.165169732868811	1.25850202005252	1.77504981733846	0.12897142562926	0.801189293463708	-4.5826075019527
Q15583	TGIF1	0.0848045960508863	3.44642499616652	1.65274366924707	0.152206193602973	0.809242066405688	-4.58267815708665
Q15904	ATP6AP1	0.0754457577390387	3.24095262493723	1.54443157444589	0.176140464964717	0.830066782329383	-4.58285481155956
Q86VI3	IQGAP3	0.049725947858168	3.3520738596015	2.18979141022465	0.0735885685847537	0.734642875539009	-4.58303227326866
Q9BSU1	C16orf70	0.100020596955363	3.19430998948518	1.46202479656728	0.196710274766252	0.844295969579547	-4.5843688927675
P78330	PSPH	-0.0509024320321173	3.25899121481777	-1.85259337294898	0.116093771138288	0.779922427471933	-4.5857524641784
Q9NWZ3-1	IRAK4	0.0994571583311591	2.66884313063538	1.43508801318627	0.203909181660654	0.844769364487011	-4.58654791256876
P20674	COX5A	-0.0872303180175831	3.27136126438599	-1.80672200751761	0.123548226160287	0.793913864270319	-4.58703219096817
Q15147-4	PLCB4	0.0572661085461637	3.36565467187173	1.71002526023275	0.140853821551099	0.802001738429253	-4.58789239962317
Q53T94	TAF1B	0.0667898442672534	3.37735786977951	1.8687303291262	0.113579748947878	0.777632288017464	-4.58823958058825
Q9Y6B7	AP4B1	-0.0684927196433702	3.34044861705439	-1.65927435734801	0.150868186012905	0.808847465472399	-4.58874450149013
Q8TAD8	SNIP1	0.0662250945748977	3.34682322532473	1.69011218909792	0.144703264719544	0.802001738429253	-4.58930534508548
Q9BV73-1	CEP250	0.0576133715413543	3.23712738440459	1.95347365230949	0.101249110885826	0.777418231545286	-4.59054411126625
Q9GZR2-1	REXO4	0.0578087682523537	3.34899360485743	1.89271549918618	0.109943636772278	0.777632288017464	-4.59173740672012
P78345	RPP38	0.0830268939502497	3.39117332051444	1.91562585363425	0.106579898119883	0.777632288017464	-4.59179151364658
Q96PK6-5	RBM14-RBM4; RBM14	0.0688941335741466	3.34096934663233	1.63277450515899	0.156369296870319	0.809242066405688	-4.59196635047941
Q6IQ21	ZNF770	-0.128074395668925	3.42583125587867	-1.32270551592468	0.236646858397162	0.863123154559365	-4.59214115755652
Q9GZP4	PITHD1	-0.121557060719292	3.31453222072886	-1.78643075950998	0.126996012815697	0.798617549444283	-4.59267588123021
Q7Z7H5	TMED4	0.0718391032890746	3.29911732101608	1.79430448212467	0.125646946405203	0.795679893814408	-4.59318571074687
Q08431	MFGE8	-0.0707292504993572	3.38102050330878	-1.66766470657813	0.149165945805204	0.806678254139263	-4.59521245037482
Q96GD0	PDXP	0.0568740315936912	3.07930495834989	1.79521386068349	0.125492054864088	0.795679893814408	-4.59561571638169
P61006	RAB8A	-0.142762965451013	3.26831392280867	-1.67977149054269	0.146742632847118	0.802001738429253	-4.5959979098267
Q9BT17-1	MTG1	-0.0832414705890287	3.34763197142475	-1.7053870242539	0.141741392673161	0.802001738429253	-4.59712900172108
P09326	CD48	0.282859674137445	1.30069638345363	1.75505109123332	0.132516598604306	0.80153112064763	-4.59837096055841
Q9HAD4	WDR41	-0.0703495306181162	3.28579003686538	-1.85935706522816	0.115033317304972	0.779922427471933	-4.59844380506832
Q9P2R6	RERE	0.054965571786064	3.39733145720703	1.76335376153267	0.131033236962985	0.80153112064763	-4.59845159135298
Q5TC12-1	ATPAF1	-0.0646010865230812	3.28637432335283	-1.62206084954432	0.158648066667515	0.809242066405688	-4.59864738921663
Q5W111	SPRYD7	0.0842092409164969	3.12953104520981	1.36661359201339	0.223322568863309	0.858240323582177	-4.59883986116837
Q8TDM6-1	DLG5	0.0461691216318257	3.41140603126108	2.08064261402381	0.085244027000358	0.750809386041796	-4.59964369578078
P35442	THBS2	-0.121154996187995	3.47559785848554	-1.3032130960359	0.242789443397893	0.863518733536854	-4.60132531324206
Q9H0F6-1	SHARPIN	0.0858825750238567	3.3236272584817	1.35052243227848	0.228124236039595	0.862577200047202	-4.60137715172463
O76070	SNCG	-0.0802079445990119	3.23413760344312	-1.75126342798702	0.133198802020891	0.80153112064763	-4.60142300317081
P0DMV8	HSPA1A; HSPA1B	0.0645119819126331	2.7847499428805	2.56000778211481	0.0450266443171479	0.693258820639974	-4.60248086011276
Q92484	SMPDL3A	0.0928362152379545	3.22076607891773	1.36327370419015	0.224311551850027	0.858240323582177	-4.60262769517841
O43291	SPINT2	0.0687288053540468	3.50731149924821	1.73735374180971	0.13573394955026	0.802001738429253	-4.60292756828761
Q13242	SRSF9	0.0513156952340233	3.32270925913594	2.15275452409745	0.0773465185318817	0.736243234475022	-4.60301239008244
P57775	FBXW4	0.0887141345017916	3.39606703871741	1.33074916354819	0.234153240873807	0.863123154559365	-4.60380632528723
Q16836-2	HADH	-0.0947532715678643	3.23894143060043	-2.06464584161952	0.0871058839711477	0.75221525295928	-4.60413483496799
Q5VYV7	SLX4IP	-0.116099556822513	3.23856668200314	-1.2911064349281	0.246676388113445	0.86360910680431	-4.60436941685917
Q5H9L2	TCEAL5	-0.0802766763102301	3.38523716814525	-1.56237680838147	0.171939819771205	0.821444232041286	-4.60460740799489
P21860-1	ERBB3	-0.0954786665862737	3.48421253276674	-1.36313638914924	0.224352298070303	0.858240323582177	-4.60496240707636
Q4VCS5	AMOT	0.128752519840295	2.18770494657912	1.95458289510716	0.101097015482451	0.777418231545286	-4.60534797850154
P45983-4	MAPK8	-0.0666370514852759	3.36380562243667	-1.96915920184785	0.0991197725557539	0.772540300044155	-4.60622026245199
Q9NSC5-1	HOMER3	-0.0906221088119233	3.19421267401363	-1.60364779718359	0.162639579535275	0.809242066405688	-4.6069925020076
Q7LGA3-1	HS2ST1	0.0925204168040517	3.09306339810563	1.66273207044784	0.150164405733388	0.808008788369084	-4.60836515980822
P38159-1	RBMX	0.101672788877236	3.38907007926204	2.06608937097381	0.0869361701882915	0.75221525295928	-4.60972914187817
Q9Y2Y9	KLF13	0.230315390988459	3.04337905535104	0.995141324976156	0.360118457604562	0.894655073510897	-4.60976119202619
Q16585	SGCB	0.204024155429363	3.4659502050755	0.986819233486528	0.363849753442398	0.896547236031715	-4.61007957001034
Q92889	ERCC4	0.0581237341469842	3.08815456116283	1.77991415027437	0.128123414566793	0.798703209709946	-4.61112869895608
Q96BW5-1	PTER	-0.0619539782258346	3.14752368663109	-1.61075452436283	0.161087669346005	0.809242066405688	-4.61279981761468
P55058	PLTP	-0.0758984953765804	3.38978336873358	-1.5226042125637	0.181381505870116	0.833216346497368	-4.61286707283258
Q9NPH3-5	IL1RAP	0.189360342125234	3.29954307608249	0.977630472813311	0.368005515406056	0.897303708695867	-4.61449748067616
Q9NYY8	FASTKD2	-0.0787172055146165	3.37934244119011	-2.04525647136304	0.0894187057740959	0.75221525295928	-4.61451186283013
Q5QJ74	TBCEL	-0.0733933432254091	3.24129060162883	-1.53632468679826	0.17807001905222	0.830173883855703	-4.61471963474432
P17014-1	ZNF12	0.111249558158942	3.33424905997538	1.30149018504147	0.243339221928015	0.863518733536854	-4.61546232849924
O95208-1	EPN2	0.09560269836484	3.30799029976573	1.76634405624495	0.130503017950416	0.80153112064763	-4.61591407955476
Q7Z3D4	LYSMD3	0.115992058897404	3.2645546894489	1.27109954211054	0.253221953969865	0.866252015734413	-4.61669543139702
O00151	PDLIM1	-0.0442968218904931	3.33664466066952	-2.16099127204649	0.076493901917667	0.736243234475022	-4.61708096880041
P19838-2	NFKB1	0.0592081012904687	2.89855657936449	1.73725451418293	0.135752204259139	0.802001738429253	-4.61822056981854
P30291-1	WEE1	0.0509693717770203	3.39312361327824	1.72998525151513	0.137096109365003	0.802001738429253	-4.61888996727376
O15372	EIF3H	-0.0469932805297694	3.32402750486696	-2.18209610728091	0.0743534634792414	0.736243234475022	-4.61912320500113
Q9UK41-1	VPS28	-0.0548031824170564	3.2702246895181	-1.65801015623519	0.151126300298425	0.809100471660512	-4.61954379994771
Q9NSI6-2	BRWD1	0.0578039935621414	3.38135168041739	1.91015738939892	0.107373239048912	0.777632288017464	-4.6211395018771
Q9P215	POGK	0.0656407430418944	3.27902602008762	1.86988500477021	0.113401965701273	0.777632288017464	-4.62175709070271
Q96IW7	SEC22A	0.113746999499971	3.2472163235687	1.21710437600512	0.271663209850482	0.874681539292867	-4.62186353129912
Q96A72	MAGOHB	0.0756591856169894	3.3023336304489	2.09508758718415	0.0835979583457967	0.745488057719842	-4.62190701796735
Q8N0W3-2	FUK	0.0764594872371442	3.17312173167274	1.46615634456314	0.195627333848294	0.843632815050238	-4.62214707369909
Q96A73-1	KIAA1191	0.0693144466794044	3.35247976251402	1.58315501926323	0.167195563331965	0.816501821694996	-4.62231022763866
Q9NZM3	ITSN2	0.0560838360452949	3.14794086632728	1.70913237204596	0.141024259854518	0.802001738429253	-4.62286444768503
O14732-1	IMPA2	-0.0974985151854576	3.4188056015405	-1.46724035900272	0.195344122803064	0.843632815050238	-4.62365115773724
Q8WZA0-2	LZIC	-0.0684897738951846	3.22083516291079	-1.61369974016241	0.160448707484773	0.809242066405688	-4.62372836525369
P10606	COX5B	-0.0892806332916731	3.27413753335687	-1.798928976151	0.124861238954532	0.793913864270319	-4.62373400705707
O15525	MAFG	0.0810519437704229	3.27374183934172	1.59309528223533	0.164970525868929	0.814115969609144	-4.62375445815298
Q9Y259-1	CHKB	-0.153058038167731	3.33780151412568	-1.32945585790919	0.234552568685447	0.863123154559365	-4.6238589048422
O60493-1	SNX3	-0.0842112340734214	3.13584943753181	-1.7201859870817	0.138928473700708	0.802001738429253	-4.62434764048083
O00743	PPP6C	-0.0698578686926893	3.30945432061502	-1.84889116039791	0.116678367026607	0.781328013615461	-4.62487515012053
P17302	GJA1	-0.112286848659805	3.47716982409897	-1.96594317075132	0.0995526170958308	0.773573349800029	-4.62568739953589
Q9UGP5	POLL	0.125159599627191	3.24071022109873	1.1894755706563	0.28154764983316	0.876864111598756	-4.62605171056092
Q15776	ZKSCAN8; ZNF192	0.13543198033949	3.14788837074194	1.21814461517439	0.271297052265854	0.874681539292867	-4.62620063949931
P23378	GLDC	-0.108563852700612	3.38265820823405	-2.23407755569254	0.0693429827785764	0.727771020609183	-4.62638457219901
Q9BXJ9	NAA15	-0.0429635308601145	3.32876632111275	-2.40643141477442	0.0551127144471003	0.719760399457179	-4.62662214023313
Q9Y6M9	NDUFB9	-0.110475093174834	3.24628321326651	-1.61722325577914	0.159687494872825	0.809242066405688	-4.62712613346638
O15121	DEGS1	0.127233421931116	3.24785640062166	1.22588694032834	0.268585368979457	0.874681539292867	-4.62886748774921
Q7Z6M4	MTERFD2; MTERF4	-0.136109212606454	3.34202847406425	-1.55726265191106	0.17312711300667	0.824476232766713	-4.63042015632526
Q9UK96	FBXO10	0.075111246501712	3.36002263687852	1.42841043076853	0.205731325859353	0.844769364487011	-4.63093344600179
Q99941-1	ATF6B	-0.101077567529326	3.31745447232491	-1.36201700615173	0.224684710750641	0.858884454847492	-4.63103399789238
Q5H9F3-3	BCORL1	-0.0757600896648513	3.17176649874146	-1.48000620164175	0.19203767944145	0.843027939667053	-4.63110052754918
O15514	POLR2D	-0.0639232420367577	3.33560979888631	-1.79510270181076	0.125510978020972	0.795679893814408	-4.63187107046255
Q2TB18	ASTE1	-0.134509774936925	3.24387847727005	-1.16968247422314	0.28881946398834	0.876864111598756	-4.6322464499471
Q9Y3B6	EMC9	0.0781490588412082	3.27972490934696	1.45964466517095	0.197336686042125	0.844295969579547	-4.63247324382183
O95478	NSA2	-0.155377836627127	3.41135109950376	-1.81859461447685	0.121574227484762	0.793913864270319	-4.63323650946417
Q8NHU6	TDRD7	-0.105686449711113	2.9675272979823	-1.16594482294262	0.290210696661643	0.877028075353945	-4.63344250169491
P0C2W1	FBXO45	0.151285111729423	3.22259979187759	1.07387117690628	0.326332344491031	0.88685342237452	-4.63384673601545
Q9NVV0	TMEM38B	0.139626500080519	3.10600943711545	1.13772496559337	0.300901683929544	0.880769241182566	-4.6341289879301
P32780	GTF2H1	0.0659121513437075	3.35526157030748	2.03009938437344	0.0912704625036882	0.75618465262235	-4.6346385224418
P08047	SP1	0.0756980141391252	3.3146680763598	1.71119524088948	0.140630796309085	0.802001738429253	-4.63556224996058
P49454	CENPF	0.0396628543471142	3.36821995769581	2.70698621758701	0.0372043918045929	0.66660007029301	-4.63664343245621
Q6P4Q7	CNNM4	0.134388726271423	3.23534176831642	1.32576478215241	0.235695636490998	0.863123154559365	-4.63686137457468
Q96BH1	RNF25	0.0625411901536323	3.3304830003425	1.82297168402061	0.120854428192876	0.793913864270319	-4.64036279021186
O75569-1	PRKRA	-0.0620028658694446	3.31896522990976	-2.0522485655366	0.0885774914569999	0.75221525295928	-4.64064600630448
Q9BSY4	CHCHD5	0.0556270886290912	3.29129534851302	1.68373420421566	0.145957821035621	0.802001738429253	-4.64073118928582
P0DJD1	RGPD2	0.0588694150527598	3.44418835944498	1.65583200363432	0.15157202485196	0.80923621918044	-4.64140595720021
Q99611	SEPHS2	0.0664181385828407	3.27876914192652	1.49867276394839	0.187297425944769	0.840631487299337	-4.64155588110247
Q96MX3	ZNF48	0.0965695964565668	3.37991889149562	1.50491319736067	0.185737445166684	0.838627113523051	-4.64181439030379
Q8WVV9	HNRNPLL; HNRPLL	0.0494937414933639	3.35961418382774	2.04294257206342	0.0896988892344313	0.752260118983765	-4.64193550442994
Q96HE9	PRR11	0.0547725068669923	3.36189255243361	1.69382897501257	0.143977034521672	0.802001738429253	-4.64226582243312
P23588	EIF4B	-0.0895778197714938	3.33926057530528	-2.24062918428828	0.0687369244256413	0.727771020609183	-4.64252210356205
Q8N201	INTS1	0.0402753972528799	3.34357302474659	2.27675254491717	0.0654933109997932	0.727771020609183	-4.64294210799931
P53804-1	TTC3	0.174346579567972	3.26388519343026	0.756169340970952	0.479696115116179	0.925378072710919	-4.64414065554208
Q7L5N1	COPS6	-0.0791961680052534	3.2635213290205	-1.96903782266279	0.0991360741695556	0.772540300044155	-4.64423083138484
Q13098-7	GPS1	0.0525508349488695	3.30825958345574	1.80158025412495	0.124412987293191	0.793913864270319	-4.64558798205312
Q8WXI2-1	CNKSR2	0.0615429712229422	3.4016265460865	1.67251675643464	0.148190105081054	0.804618225964	-4.64565098979978
Q8N302-1	AGGF1	0.0588528567346712	3.28147900461607	1.65376838943747	0.151995489030111	0.80923621918044	-4.64615522023978
Q02338	BDH1	-0.0697063541239373	3.25783590305564	-1.41381333559736	0.209767219938327	0.848003541820087	-4.64647193794873
Q9Y2I6-1	NINL	0.0684029203978541	3.44634517381228	1.46371101484698	0.196267615877208	0.843632815050238	-4.64649593886432
Q9UEG4	ZNF629	0.0530014169692554	3.23939341852387	1.80100005108012	0.124510945322976	0.793913864270319	-4.64676486658285
Q9Y2H0	DLGAP4	-0.0514540714056232	3.37042261659461	-1.90714643338583	0.107812595972998	0.777632288017464	-4.64736478955685
Q8NHQ1-1	CEP70	-0.172366828664299	3.35394589851457	-0.673062410722777	0.527302585024731	0.942662885199221	-4.64833583646503
Q00577	PURA	0.0835907813314518	2.56894898675221	1.60642817810523	0.162030715037288	0.809242066405688	-4.6490641453891
Q9H825-1	METTL8	-0.062980556156748	3.37245189947988	-1.51732142382719	0.182672025356507	0.833875202501698	-4.64908905900941
P32942	ICAM3	0.181650260796658	2.6092093449128	1.07453000417681	0.326061043068124	0.88685342237452	-4.64919538638776
P51798-1	CLCN7	0.0813847633178238	3.29103978575872	1.44520738235808	0.201176439906064	0.844769364487011	-4.65132862430305
Q96QF0-1	RAB3IP	0.0931445351269172	3.24273172419854	1.29024434118102	0.246955286575864	0.86360910680431	-4.65136581407724
Q9UDX5	MTFP1	-0.134932760435914	3.37128984223289	-1.02198767501724	0.348291288887587	0.891894850640453	-4.65219586917077
Q5VZK9	LRRC16A; CARMIL1	-0.0462661284569462	3.35254958102051	-2.26048819417129	0.0669334495653635	0.727771020609183	-4.65303423145705
Q9H3H9	TCEAL2	-0.0902892337448616	3.45238201639882	-1.29947658092835	0.243983177203983	0.863518733536854	-4.6532099669872
P17931	LGALS3	0.0602560532058633	3.13501352867011	1.59420879469131	0.164723054434724	0.814115969609144	-4.65322466969244
Q13111-1	CHAF1A	-0.0373819600223823	3.34080211056808	-2.15620437287674	0.0769882192145197	0.736243234475022	-4.6533133874279
P33908	MAN1A1	0.206167972813623	2.41328042897462	1.08417675577628	0.322110026275416	0.88685342237452	-4.65384431662616
Q92567	FAM168A	0.0964249159630634	3.21206490392887	1.2501794182329	0.260231255950984	0.870430160894381	-4.65417240166811
Q8NDN9	RCBTB1	-0.0844712173885566	3.32058017684945	-1.29679542000467	0.244842993159993	0.863518733536854	-4.6558338315769
O14525-1	ASTN1	-0.152587742537988	3.27176539478751	-0.708565201304768	0.50659256854234	0.932086233435219	-4.65598939614671
Q86X52	CHSY1	0.124223302273087	3.38732271264182	1.36296104384767	0.224404339038823	0.858240323582177	-4.65632920043692
P33241-3	LSP1	0.367939257179422	0.937067574361956	1.79339009736256	0.125802882064244	0.795679893814408	-4.65634551073138
O15027-5	SEC16A	-0.115019284451839	3.21796657184514	-1.04556691958112	0.338165829182255	0.888627697645208	-4.65639634888477
Q96BW9-3	TAMM41	-0.0758813515442725	3.28712662478461	-1.63083325483432	0.15677983493161	0.809242066405688	-4.65656055054473
Q00005-7	PPP2R2B	0.15688284174861	3.40260425661626	0.739065902577293	0.489243550869977	0.927946740003831	-4.65813327333986
P13861	PRKAR2A	0.0512604453464958	3.15013329502448	1.90244682770224	0.108501985410574	0.777632288017464	-4.66065249341423
P12259	F5	0.222638016001789	1.39784255216704	1.48491352957057	0.190780679407597	0.842458239693728	-4.66105092711136
Q9BRF8-1	CPPED1	-0.0768037563810193	3.30659041599147	-1.65462766852194	0.151819021117865	0.80923621918044	-4.6611003364434
O95674-1	CDS2	-0.106603286748732	3.1861122347683	-1.42850564599002	0.205705238105676	0.844769364487011	-4.66143225298701
Q96EK5	KIAA1279; KIF1BP	-0.0433326032887251	3.28230414817256	-2.0042261864427	0.0945225344090006	0.764153550100263	-4.66241801059322
Q5VV67-1	PPRC1	-0.0649458118237849	3.42956865895258	-1.87469577207951	0.112664261879133	0.777632288017464	-4.66272836783117
Q6NVV7	CDPF1	0.085154433771541	3.31939419848992	1.27301455005455	0.252588791170182	0.866252015734413	-4.66333550610667
Q8IYS2-2	KIAA2013	0.0940213472923989	3.27904561990297	1.60029694232356	0.163376296459683	0.809242066405688	-4.66402328662071
P78563-5	ADARB1	0.111745048290883	3.32434171283409	1.36926362930182	0.222540696965796	0.858240323582177	-4.66562105892719
Q9H0F7-2	ARL6	0.0734183995750945	3.05407113072792	1.48284464574649	0.191309673496263	0.842479975778578	-4.66582143561023
Q9NVA1	UQCC; UQCC1	-0.0785618408592291	3.28071807416634	-1.76356759642818	0.130995250586953	0.80153112064763	-4.66604947818993
Q8TBP6	SLC25A40	0.141187674734693	3.22596461351724	0.996083754968116	0.359697853341724	0.894655073510897	-4.66617839383697
O14964	HGS	0.0522500977176239	3.29071543834202	2.06733323366703	0.0867902033594755	0.75221525295928	-4.66628311957741
P53041	PPP5C	-0.0558624922199533	3.32594186715012	-2.07983495801601	0.0853370417920289	0.750809386041796	-4.66644093301355
Q15007	WTAP	0.0591358392338821	3.34872464343991	2.1326159727579	0.0794728419295607	0.743274667879694	-4.66993292982008
Q8N128-2	FAM177A1	0.0836811602249569	3.36223258995748	1.66211151697981	0.150290477190131	0.808008788369084	-4.67113019216041
Q9H2J7	SLC6A15	0.141532257544955	2.97073721225343	1.08431585449946	0.322053349066891	0.88685342237452	-4.67131089389642
Q9H9Y4	GPN2	0.124958143289305	3.35136685203673	1.62770820082565	0.157442916232266	0.809242066405688	-4.67170638997676
Q99704	DOK1	-0.0712032538441256	3.24470073628885	-1.36403702358093	0.224085171234262	0.858240323582177	-4.67199899289124
Q9UPS8-3	ANKRD26	0.071142265886252	3.31088888866782	1.45651717640689	0.198162624240301	0.844295969579547	-4.67214416990712
Q12769	NUP160	0.0446303717014188	3.34105234811258	2.20132454723487	0.0724574878455374	0.734642875539009	-4.67227461241921
P55060-1	CSE1L	-0.0539799138977251	3.32218094670728	-2.51526444491511	0.0477447481911635	0.701085908826398	-4.67317683863857
Q9HC36	RNMTL1; MRM3	-0.0727526557249038	3.29572458016585	-1.58714162505069	0.166299760418586	0.814843634213137	-4.6739126291861
Q9C0C2	TNKS1BP1	-0.05111029553418	3.40208428295712	-2.48002126544036	0.0500088596952347	0.708559878261919	-4.67403072133204
Q9H668	OBFC1; STN1	0.13668292443883	3.2258587971904	0.819740458137614	0.445362167516401	0.914506952276729	-4.67486313275921
Q9H5V8-1	CDCP1	0.0989489966923293	3.38504969949582	1.33450796285747	0.232996147335123	0.863123154559365	-4.6764592692772
P35240-2	NF2	0.0513026412024016	3.24039680660275	1.80385669169735	0.124029386634596	0.793913864270319	-4.6769982624583
P0CK96	SLC35E2B	-0.15244776405791	3.35811584500564	-1.06548003092718	0.329804210430877	0.88685342237452	-4.67745326508398
P63208	SKP1	-0.0886235907789676	3.26595704438203	-1.943847556504	0.102578787278469	0.777496785576642	-4.67752652644794
Q9UHL0-1	DDX25	0.12261946299854	3.3173948118117	0.475510114812891	0.65214042910729	0.966345193303871	-4.67758728937798
P53611	RABGGTB	-0.0635788948422264	3.27825558972986	-1.51518916062704	0.183195368867038	0.834605029660284	-4.67773540994491
Q9Y2H1	STK38L	0.0762321719791068	3.2354492070534	1.82577685343875	0.120395360238341	0.793913864270319	-4.67850942114944
Q9NTX7	RNF146	0.135449349621368	3.34247265153317	1.22646447208115	0.268384050072631	0.874681539292867	-4.6793817285088
P18827	SDC1	0.0917060406257926	3.14040608048571	1.61464030242064	0.160245168705411	0.809242066405688	-4.6794112522637
Q92499	DDX1	0.0275043705390383	3.14393713423512	2.56093063941963	0.044972353070609	0.693258820639974	-4.67952204529237
P18859-2	ATP5J	-0.239336779337342	3.40950419640795	-1.73167829308163	0.136781943621871	0.802001738429253	-4.67954370397682
Q9NYW8	RBAK	0.0971962817159309	3.29488239043484	1.26149004440405	0.256420532811894	0.866252015734413	-4.6803590783027
Q15834	CCDC85B	0.153135010632202	3.36425413377819	1.25983925533839	0.256973606436671	0.866382458306416	-4.68040609744128
P24278	ZBTB25	0.096129463779176	3.38676409316112	1.1124064649077	0.310777485706011	0.882509719656767	-4.68162314334698
Q8N9N5-7	BANP	0.0502272533475952	3.35295739607633	1.6929460704414	0.144149223667055	0.802001738429253	-4.68162664401858
O95409	ZIC2	-0.0594856473642781	3.36904514194604	-1.68480521228691	0.145746413066949	0.802001738429253	-4.68219599614053
Q9BRP8	WIBG; PYM1	-0.0939043148420576	3.33383981192143	-1.79063094041151	0.126274583699609	0.797986163892998	-4.68241260727435
Q9H9V9	JMJD4	0.0804076278724652	2.95147847422555	1.32444766689304	0.236104744454884	0.863123154559365	-4.68250860240107
P62699	YPEL5	0.131625596989839	3.32907539916893	1.48229200895421	0.191451210586873	0.842479975778578	-4.68289617755645
P21802-16	FGFR2	0.0652523824397643	3.36755225830262	1.48587478865983	0.190535362584258	0.842458239693728	-4.68306019077075
Q14651	PLS1	-0.041334528296086	3.29535248970999	-1.92517876236072	0.105208175721799	0.777632288017464	-4.68413310656103
Q7Z6K5-2	C15orf38-AP3S2; C15orf38; ARPIN; AP3S2	-0.0747585739397935	3.13673768039405	-1.34052293375026	0.231155304769159	0.863123154559365	-4.68415744320311
Q8NCH0	CHST14	0.108205831314975	3.35343103618253	1.47732797677081	0.192726976726565	0.843027939667053	-4.68460715459949
Q9UJ55	MAGEL2	0.123387069665611	3.3606396834417	1.00667705395297	0.354997244616997	0.893809239995262	-4.68494136640717
Q7Z494-1	NPHP3	0.0632472187794611	3.3352094297279	1.57516442677074	0.169005022529262	0.819430384288872	-4.68497718676639
Q8WVY7	UBLCP1	-0.113824619123076	3.32051086824363	-1.84541184016373	0.117230452180381	0.782903201393225	-4.68578367310782
Q658Y4	FAM91A1	0.0592805691169316	3.13209616401971	1.70488173022472	0.141838415954256	0.802001738429253	-4.68701252316599
Q7Z2W4	ZC3HAV1	-0.0372677427806782	3.34461793826959	-2.08607628359934	0.0846209564804089	0.749436543903407	-4.68724332358402
O76074	PDE5A	-0.0467895441865097	3.37650105669059	-1.91225947740961	0.107067574634931	0.777632288017464	-4.68788871008138
Q8NCY6	MSANTD4	0.0809268990880398	3.3138594619497	1.2318364263822	0.266517811311306	0.874681539292867	-4.68867634593379
Q9H3S1-1	SEMA4A	0.346351257349229	1.29653175814178	1.80085382533978	0.124535645301001	0.793913864270319	-4.68874895300505
P16333-1	NCK1	-0.0481649218755314	3.29751555779625	-1.86868767004318	0.113586322441403	0.777632288017464	-4.68988094458477
Q04759-1	PRKCQ	-0.0657313624958418	3.42415202767119	-1.77560309669451	0.128874691552126	0.801189293463708	-4.69045538906458
O14832	PHYH	0.058013962706515	3.32369940507998	1.91669846640934	0.106424983509268	0.777632288017464	-4.69106240445174
Q9BR11	ZSWIM1	0.0994002145442198	3.34479778071871	1.02960418761026	0.344993861944524	0.891702000264035	-4.69181953625693
Q86UA1	PRPF39	-0.0477652463223399	3.27994233170624	-1.80726668970525	0.123456970222723	0.793913864270319	-4.69212530175837
Q8NAT1	GTDC2; POMGNT2	-0.117387332326929	3.25182775819401	-1.13482689574491	0.302018424337408	0.881137055911465	-4.6923031483539
P98174	FGD1	-0.0540426024902701	3.36943486620967	-1.81453163748924	0.122246197786295	0.793913864270319	-4.69243856642608
P48735	IDH2	-0.0625425206946909	3.02390981539419	-2.09072967215608	0.0840910860617835	0.748213888021472	-4.692584367463
Q9H9G7	AGO3; EIF2C3	0.0922593818919585	3.32421031857926	1.48657839140704	0.19035598861118	0.842458239693728	-4.69310409798072
P42331-4	ARHGAP25	-0.113716882001122	2.27073968577292	-1.10097759177026	0.315324451512583	0.884819028807706	-4.69363595324806
P82664	MRPS10	-0.101903647412577	3.28545094014127	-1.62528872496408	0.157958147716592	0.809242066405688	-4.6939262211767
Q9UHA3	RSL24D1	0.0642957146382169	3.35165748625206	1.74797178230566	0.133794480475912	0.80153112064763	-4.69527974951972
O95628-10	CNOT4	0.0484326873218359	3.33650565133484	1.74559256540486	0.134226674802013	0.80153112064763	-4.69528338516397
P17019	ZNF708	0.0918357124289674	3.41979988697717	1.16455523311859	0.290729400836331	0.877028075353945	-4.69607598286549
Q92844	TANK	0.0596681695761505	3.27177627583731	1.53942188382988	0.177330481782828	0.830066782329383	-4.69609940833433
Q07820	MCL1	0.0775260343082592	3.39291683278748	1.64812679944152	0.153159043897335	0.809242066405688	-4.69654462115939
Q2M2I8-1	AAK1	-0.0370224481154796	3.32462629881202	-1.97850447732768	0.0978728173687611	0.771880054810092	-4.6965462933273
Q5BKY9-1	FAM133B	-0.0783161475645429	3.40789990552021	-1.41325814006399	0.209922161148335	0.848003541820087	-4.69785022354316
Q03393	PTS	0.090332539141309	3.33534942810406	1.27544262405893	0.251788020571044	0.866252015734413	-4.69789386312651
Q9H992	MARCH7	0.0898125965875793	3.37414849222266	1.39525600004438	0.215003752385427	0.853209147818975	-4.69799719959374
P43268	ETV4	-0.074344101954522	3.43544992868014	-1.46640173363184	0.195563189536703	0.843632815050238	-4.69856439796062
Q14201-2	BTG3	0.118686109932689	3.27041004881226	0.902581495252282	0.403367678712399	0.907440161583258	-4.69939570885827
Q15427	SF3B4	0.0574052852708591	3.35997365579836	1.56889319246301	0.17043825299075	0.820689972741255	-4.69954804255458
Q4ZIN3-1	C19orf6; TMEM259	0.165219739843087	3.30649090531956	1.28248472528591	0.249478350639842	0.865279342725527	-4.69997363809782
Q53S33	BOLA3	-0.0590909326045577	3.25224937486423	-1.4778865280041	0.192583030488459	0.843027939667053	-4.70028565571119
Q9Y4A8	NFE2L3	-0.0811517441653601	3.4563106048798	-1.30983960971151	0.240685324325702	0.863518733536854	-4.70114385191573
Q53F19	C17orf85; NCBP3	0.044413996417421	3.28681090213021	1.83256383202296	0.119291850550739	0.79238708002188	-4.70167218952513
Q9BWT7	CARD10	0.0865574244147883	3.37533823972299	1.25312411907309	0.259234340610309	0.869992658949833	-4.7020872710501
Q9UJW8	ZNF180	-0.114642976227653	3.39243131312065	-0.845465678940368	0.431987836341454	0.908951511719062	-4.70238228191645
A6NI28	ARHGAP42	0.0746182872501341	3.36487515254373	1.68755930290785	0.145204150829505	0.802001738429253	-4.70239220750754
Q9NZU5	LMCD1	-0.0552712387376756	3.42968097423028	-1.85805546109625	0.11523663414192	0.779922427471933	-4.7025972436206
Q9GZN7	ROGDI	0.0751014972645744	3.29624606948379	1.63755316575726	0.155363127700746	0.809242066405688	-4.70272570154199
O60308	CEP104	0.0857548607429715	3.36473220581936	1.19615472615956	0.279129856909439	0.876864111598756	-4.70275220219598
Q96N11	C7orf26	0.0748310756919775	3.33774363013019	1.32926937039107	0.234610200378105	0.863123154559365	-4.70343131106435
Q92599-1	SEPT8	0.126915805046897	3.24347358514503	1.76466199068534	0.130801008955529	0.80153112064763	-4.70467928455271
Q6ZUT1-2	C11orf57; NKAPD1	0.080916387463399	3.29282348217011	1.42678513439353	0.206177110045666	0.844769364487011	-4.7053487726208
Q8N0U8	VKORC1L1	-0.112694701535815	3.26178110605704	-0.999021800227746	0.35838914617283	0.894655073510897	-4.70639384170356
P17020	ZNF16	0.0846194303302178	3.34174330980794	1.20415955722518	0.276255992672726	0.876864111598756	-4.70677272235371
P57071	PRDM15	-0.0861384976545966	3.34865678512689	-1.18407368906239	0.283516356338871	0.876864111598756	-4.7068840250951
Q9P2M4-1	TBC1D14	-0.117552997873493	3.34318051496913	-1.01984364662433	0.349224119859768	0.891905133692684	-4.7069762432629
Q13107-1	USP4	-0.0559727347109222	3.34359875949409	-2.00354484669204	0.0946097550671808	0.764153550100263	-4.70709720620068
Q92870-4	APBB2	0.0829516022273504	3.34066080470009	1.28950183088858	0.247195724523236	0.86360910680431	-4.70738037106045
P78346-2	RPP30	0.0728645448943335	3.3610579677383	1.6515612851789	0.152449669729427	0.809242066405688	-4.70766255086699
Q9BQI6	ANKRD32; SLF1	0.0735098189252368	3.38365470026852	1.32956943669467	0.23451747482686	0.863123154559365	-4.70927906439387
Q9UMY1-1	NOL7	-0.0870397731358418	3.33215329395118	-1.5284481822311	0.179963962160154	0.830969706307806	-4.70945706699527
P51513-1	NOVA1	0.0785982610039105	3.28650655578063	1.30935922989008	0.240837306034113	0.863518733536854	-4.70976176304976
Q9H9H4	VPS37B	0.0759432554100032	3.03204403092364	1.39212456789075	0.215899175705517	0.854243669939517	-4.71004415571873
P01034	CST3	-0.152541545261494	3.21546207382121	-1.24919907353856	0.260563899259247	0.870430160894381	-4.71104629090237
Q9UIQ6-1	LNPEP	0.071109010807388	2.83317890398479	1.43263687423771	0.20457628727059	0.844769364487011	-4.71119382416214
P46109	CRKL	-0.0516728338882234	3.26686702394715	-1.99764075744403	0.0953690039215773	0.764153550100263	-4.71142491040999
Q6ZS30-2	NBEAL1	0.0962382381752179	3.33823200387759	0.970775115995135	0.371130542146703	0.898399744082953	-4.7114699415059
O95243-2	MBD4	0.0772320847599145	3.3073545981985	1.45218362095883	0.199312409991466	0.844295969579547	-4.71184061743239
O15069	NACAD	0.0931993774548688	3.1848534515879	1.06941907855042	0.328170616762508	0.88685342237452	-4.71209531570636
Q96F24-1	NRBF2	0.0615925744948652	3.35265204339697	1.68016685172719	0.146664147380283	0.802001738429253	-4.71234274655809
Q8NC44	FAM134A; RETREG2	0.115004727120975	3.31173511824885	1.19163097907193	0.280765431452361	0.876864111598756	-4.71293153005941
P17017	ZNF14	0.121986651577398	3.38506949035614	1.19925460303452	0.27801387701109	0.876864111598756	-4.71297777462529
Q14157-5	UBAP2L	-0.0673245312205876	3.36100872073879	-1.54361477811594	0.176333969456844	0.830066782329383	-4.71309441383324
Q86YM7-1	HOMER1	0.0652836286947218	3.3751948171632	1.66825695070074	0.14904649963391	0.806678254139263	-4.71311011776091
P05362	ICAM1	-0.064820824805505	3.0288721891472	-1.43081017158345	0.205074763342933	0.844769364487011	-4.71364858753517
Q9Y6K8	AK5	0.105012784227039	3.35070521214686	1.03669771164762	0.341945813916144	0.890060642277851	-4.71393144304067
Q9H211	CDT1	0.109284073915653	3.24262146473105	0.955230893292429	0.378294428348377	0.898549931818952	-4.7143163864877
Q8N158	GPC2	0.0802180892690969	3.37616468663359	1.43711740036738	0.203358391282978	0.844769364487011	-4.71573995907456
Q9Y5B6	GCFC1; PAXBP1	0.0438933541217379	3.30535198132577	2.01226522087714	0.0934996038761318	0.762799297725153	-4.71579775053562
Q5SWA1	PPP1R15B	0.129768392967015	3.29695028062876	0.835796501337968	0.436979544289857	0.909970745284655	-4.71690318356906
O75182-1	SIN3B	0.0475632595618372	3.34688520929873	1.88358771797055	0.111313396122415	0.777632288017464	-4.71695612396192
Q15025	TNIP1	-0.0937954723350254	3.38311829534901	-1.16923426186487	0.288985994265268	0.876864111598756	-4.71757377689556
O75534	CSDE1	0.0807281957920556	3.45345159815025	1.50252181340266	0.186333788003762	0.838627113523051	-4.71758834494301
Q15018	FAM175B; ABRAXAS2	-0.0504820588933351	3.23573515701887	-1.73214154100336	0.136696105452813	0.802001738429253	-4.72034806646724
Q16600	ZNF239	0.07667037531493	3.31718900405969	1.31453214754272	0.239205244635518	0.863518733536854	-4.72117530006366
Q9Y263	PLAA	-0.0469086249750731	3.38149932256016	-2.18878802923067	0.0736878368305824	0.734642875539009	-4.72125966226259
Q6NWY9	PRPF40B	-0.0874139439741465	3.39803164601826	-1.46545454504088	0.195810891846795	0.843632815050238	-4.72242426446288
Q86T82	USP37	0.0588347288834042	3.38460354981899	1.64068533050363	0.154707040364075	0.809242066405688	-4.72261337923366
Q969H4	CNKSR1	0.0830472518809712	3.38826351288193	1.12669785600174	0.305169700810992	0.881760539741648	-4.72341114262884
Q99598	TSNAX	-0.0421462636209968	3.25554726308571	-2.02804954560502	0.0915238894403902	0.757466321236973	-4.72367621668006
P16402	HIST1H1D	0.0819760875996358	3.42832921306487	1.61008083119289	0.16123417078856	0.809242066405688	-4.72376254360992
Q86YS7-3	C2CD5; KIAA0528	0.0431699748824999	3.21487491473463	1.89839480732408	0.109099945643624	0.777632288017464	-4.72418367984143
Q9NW75-1	GPATCH2	0.0650195259676049	3.34140928435153	1.67618228011323	0.147457024649435	0.802912292845279	-4.72431651369807
Q86YB8	ERO1LB; ERO1B	0.105960930268698	3.10856424728829	0.732672896848065	0.492845744002457	0.927946740003831	-4.72546723507426
P27105	STOM	0.0882624088721517	3.33804027846049	1.62483983021784	0.158053919663454	0.809242066405688	-4.72583913091369
Q08AE8-1	SPIRE1	0.105175568677851	3.32424125122172	1.05572578062984	0.333878480578725	0.887903892099456	-4.72743258905161
Q15149-8	PLEC	0.0966615509259594	3.40312779457809	1.17817662220795	0.285679135705087	0.876864111598756	-4.72745723658812
P17661	DES	0.0857969242570993	3.31728313454796	0.538088892075361	0.610914674969055	0.962391832702452	-4.72769488851657
Q9BYK8-1	HELZ2	-0.0602773829179633	3.34083669434597	-1.53653916184637	0.178018713182108	0.830173883855703	-4.72882662656214
P34741	SDC2	0.125016048029883	3.4006427428531	1.6063329311608	0.162051536430895	0.809242066405688	-4.72913347974727
P42330	AKR1C3	0.0894640532428341	3.19461804554746	1.22944527253059	0.267347094226499	0.874681539292867	-4.72970679178781
Q96FL9-3	GALNT14	0.111369379341099	3.45188991296146	1.15738222635588	0.293419629071076	0.877734742950928	-4.73033831615854
P48454-3	PPP3CC	-0.0966931662472756	3.07495358698968	-0.907155114978016	0.401139883347502	0.906760514154989	-4.73174137072064
Q86SQ9-2	DHDDS	0.0697027302619638	3.39533813916019	1.43926564864857	0.202776848856843	0.844769364487011	-4.73226185185129
Q15306	IRF4	0.299135747924988	1.15349735189431	1.71091474842318	0.14068423305393	0.802001738429253	-4.73248232026577
Q8N6I1-1	EID2	0.0828316784478757	3.27025294707125	1.26492559351273	0.255272888400611	0.866252015734413	-4.73260667169099
Q9BXI6-2	TBC1D10A	0.0946653982784964	3.19973331720853	0.54171222025121	0.608573364598311	0.962391832702452	-4.7335814854441
P36896-4	ACVR1B	-0.0957820138465125	3.4115479782375	-0.6181396628412	0.560412496742103	0.95131405970535	-4.73452823637531
Q9UGK3-2	STAP2	-0.0666694999307895	3.41117316406984	-1.38698148806152	0.217377270019855	0.856975344387708	-4.73500911279462
O43924	PDE6D	-0.100772069648472	3.20914432455049	-1.12961851278117	0.304034287450396	0.881760539741648	-4.73518397782134
O43903	GAS2	0.259077286157073	2.09546508681038	1.28149704254504	0.249801146479967	0.865728312201933	-4.73518835431277
Q99459	CDC5L	0.0561742973744945	3.30861575494737	2.27304227674838	0.0658189579067297	0.727771020609183	-4.73527475984915
Q96JK2	DCAF5	0.0846164422274691	3.33788550230925	1.2538951291185	0.258973877852675	0.869517545245393	-4.73551195458834
O75947-1	ATP5H	-0.291654395493204	3.35301621214406	-1.71045195247418	0.140772444043785	0.802001738429253	-4.73571828645082
Q68DI1	ZNF776	0.100690380816004	3.3522848688462	0.9619690350692	0.375175699256164	0.898549931818952	-4.73578285436896
Q8TE99-1	ACPL2; PXYLP1	0.0960640374117498	3.33780388920002	0.962475378820418	0.374942163060378	0.898436786626225	-4.73592565651565
Q8N3Z6	ZCCHC7	0.0657007455765334	3.38800273592757	1.69919457567767	0.142934921971138	0.802001738429253	-4.73659405371394
Q8N4C6-7	NIN	0.11775001159911	3.29344288742686	0.972917283215929	0.370151772044385	0.897303708695867	-4.73667397889202
Q32P41	TRMT5	-0.0506743605630434	3.32919375163019	-2.01371758895442	0.0933160053824045	0.762799297725153	-4.73679468315039
Q5FWF4-1	ZRANB3	0.0751480949518505	3.36872843871866	1.4068687127621	0.211712920900536	0.849051811963851	-4.73835274464633
Q96GS4	C17orf59; BORCS6	0.0687675459966136	3.13678255695791	1.39896388308321	0.213947916754138	0.851854060901406	-4.73845469375141
Q9P2F8-1	SIPA1L2	-0.0163736523954324	3.38873963336725	-0.0564062383518159	0.956947996071402	0.997082587903408	-4.7389848941814
Q9NWS6	FAM118A	-0.0975176583669159	3.29019207153786	-1.10260616991745	0.314673121700994	0.884819028807706	-4.73945463346932
Q9H0R4-1	HDHD2	-0.05744645691005	3.2475896145475	-1.50312391305752	0.186183471587311	0.838627113523051	-4.74067816763793
Q9NQZ6-1	ZC4H2	-0.0502993297090745	3.40918378069906	-1.68370528654613	0.145963533288508	0.802001738429253	-4.74081447461799
Q7Z304-1	MAMDC2	0.0885242708968707	3.40444024976218	1.1059179191022	0.313352118973256	0.884092916933203	-4.74101825648983
Q7Z3B3	KANSL1	0.0467891425362816	3.36135409884355	1.82185386932059	0.121037845367012	0.793913864270319	-4.74116210324416
O95789	ZMYM6	0.0622902409670203	3.36623230932543	1.55342494085258	0.174023202517736	0.82567732811315	-4.74276101569865
Q6ZRQ5	MMS22L	0.0473152233179398	3.26842718818497	1.74259820779556	0.134772568513483	0.80153112064763	-4.74287824186679
Q99719-1	SEPT5	0.0734507927386872	3.11090026617299	1.29068384505771	0.246813066131534	0.86360910680431	-4.74320057678122
O94941-1	UBOX5	0.114659305324159	3.39433721605197	1.19860292796195	0.27824816222037	0.876864111598756	-4.74378022586279
Q99575	POP1	0.0399647006033528	3.30541142362097	2.04583572879875	0.0893487056077364	0.75221525295928	-4.7439808730915
Q96RY5	CRAMP1L; CRAMP1	0.107496274992763	3.28052766768337	1.27353112224347	0.252418237603912	0.866252015734413	-4.74587598925959
Q9H0L4	CSTF2T	0.0518163966351451	3.37024290626324	1.84138647521078	0.117872442576293	0.785679738875169	-4.74663764429438
Q8NDX6	ZNF740	-0.0943403242042366	3.25042555558536	-1.07969175694354	0.323941952199335	0.88685342237452	-4.74689217126211
Q8NEW0	SLC30A7	0.0737503231061363	3.2801631939166	1.22216452462566	0.269886131225822	0.874681539292867	-4.74718580564569
Q13454-1	TUSC3	-0.14210757162598	3.46137516004962	-1.09777884541207	0.316607049512345	0.884932204515426	-4.7475723312268
Q96EW2-1	HSPBAP1	-0.107279682540404	3.34775958537522	-1.30388048374016	0.242576780996991	0.863518733536854	-4.74828834257519
A6NGB9	WIPF3	-0.0982834079120003	3.27174251299072	-1.11364284380142	0.31028892495998	0.882509719656767	-4.74931152983118
Q8WUK0	PTPMT1	-0.108662020358274	3.2171896887678	-1.20200976078077	0.277025261327424	0.876864111598756	-4.75030491548672
Q8N5X7	EIF4E3	0.0831334350579544	3.10235362325958	1.20856778967174	0.274684406176386	0.8767440272917	-4.75112376718354
P48307	TFPI2	0.0740977974205141	3.28650813125206	1.1764457241299	0.28631665407967	0.876864111598756	-4.75123563814501
P29590	PML	-0.123362683527544	3.30310080922559	-0.886574077715474	0.411239508946991	0.907440161583258	-4.75255635704296
O75061-2	DNAJC6	0.0812853242304766	3.10537984268337	1.16501384304366	0.290558123413775	0.877028075353945	-4.75274736040967
O43281-1	EFS	0.092250643227719	3.31881745427625	0.940216953131246	0.385317019719803	0.900455425297857	-4.75298886416449
P12955	PEPD	-0.0708728348997852	3.32482820123507	-1.93867284670415	0.103300880645685	0.777632288017464	-4.75319297985336
P13994	CCDC130	0.0709477273780485	3.34125319946166	1.54880837140935	0.175107011379947	0.827739366178037	-4.75357503667212
Q8WTP8-2	AEN	0.0861514122391497	3.3010530555265	1.47911608870841	0.192266511482544	0.843027939667053	-4.7538616767304
Q9UN73	PCDHA6	-0.110029242404685	3.42656452409841	-0.845649459688759	0.43189337060386	0.908951511719062	-4.75401016619897
P51797-5	CLCN6	0.0858359792308213	3.36013414346084	1.22734066264352	0.268078876266579	0.874681539292867	-4.75439540810532
P51687	SUOX	0.0568173729493764	3.35153674229611	1.59186038449642	0.165245392138925	0.814115969609144	-4.75449940765667
Q92759	GTF2H4	0.0745298000410461	3.34166818313367	1.57752436791234	0.168468673891497	0.819430384288872	-4.75606473242281
O75431	MTX2	0.0518234159643918	3.30931326683218	1.76049319099874	0.131542446965742	0.80153112064763	-4.75615915760793
Q16877	PFKFB4	-0.0588740018268972	3.2415793661414	-1.46487518341405	0.19596254726512	0.843632815050238	-4.7563291635049
Q86YA3-1	C4orf21; ZGRF1	0.0741947991943532	3.35898422668609	1.51806708457225	0.182489344232702	0.833875202501698	-4.75670187552658
Q6P5R6	RPL22L1	-0.0892502134540599	3.4560721554496	-1.70898309687675	0.141052773853365	0.802001738429253	-4.75713398460732
Q76N32	CEP68	0.0577455541649229	3.37566393669612	1.45233581403465	0.199271924593216	0.844295969579547	-4.75779181229414
O14907	TAX1BP3	0.0970730354323848	3.37551223659312	1.42044456913532	0.207924769914583	0.847608307537025	-4.75805779462698
Q13136	PPFIA1	0.0568363526343713	3.30312703889262	1.95365456550449	0.101224288886554	0.777418231545286	-4.75808144789637
Q96A00	PPP1R14A	-0.0896481938899038	3.1434363483621	-1.02552320862949	0.346757466541399	0.891894850640453	-4.75866430330341
Q9UIV1-1	CNOT7	0.0565308749186199	3.3864801985821	1.63836673602384	0.155192452354127	0.809242066405688	-4.75919681077651
Q9BVM2	DPCD	0.068028530671147	3.18150916469124	1.52506988088021	0.180782134456047	0.832068073496033	-4.7597264498575
Q9HBH5	RDH14	0.0471946005332757	3.31121374917537	1.70711543669878	0.141410005479041	0.802001738429253	-4.7598945138443
Q96AZ6-1	ISG20	0.429500826260734	1.41585573337834	1.42359888909247	0.20705363044995	0.846305515616417	-4.76021754310469
O94910	LPHN1; ADGRL1	0.0588405772792855	3.38463216693038	1.51835090683523	0.182419855418771	0.833875202501698	-4.76027692568937
O14787-2	TNPO2	-0.0539270409498966	3.28014092391604	-1.66237617173766	0.150236697423101	0.808008788369084	-4.76029262895455
Q92558	WASF1	0.0772956039705735	3.18740720936102	1.35103227409816	0.227970664791577	0.862421568185888	-4.76032057041564
P83436	COG7	0.0444522048702627	3.25987635992628	1.87754722398403	0.1122292843693	0.777632288017464	-4.76110422916861
Q96HB5-4	CCDC120	0.0914728577903251	3.33794910433006	0.734186115674737	0.491991464785168	0.927946740003831	-4.76183393201188
P49356	FNTB; CHURC1-FNTB	0.0834807020660585	3.35743093078649	0.611190048324884	0.564693005562717	0.95131405970535	-4.7622078312023
Q8WWC4	C2orf47; MAIP1	-0.0539957600909225	3.30063948049038	-1.51672695037201	0.182817790746592	0.833875202501698	-4.76249449475747
Q6ZSY5	PPP1R3F	-0.0338968556025607	3.32548831887377	-0.179896700286176	0.86347341953298	0.993681457020471	-4.76360494526391
P52435	POLR2J	-0.0831015971714208	3.31556741817955	-1.50977404340104	0.184530838506425	0.837114503785637	-4.76389925958999
O95125	ZNF202	0.0984472143311394	3.39099196714381	0.903408410487718	0.402964189138913	0.907440161583258	-4.76409214495187
O00463	TRAF5	-0.0708396046158631	3.31269047246409	-1.31189750835301	0.240035227019616	0.863518733536854	-4.76523792260326
Q8N4P3	HDDC3	0.083817525339057	2.77197185328696	0.999479921113307	0.358185429110378	0.894655073510897	-4.76558052088405
Q6NUS6	TCTN3	0.105093460733986	3.33728726257061	1.15473032268632	0.294419620799215	0.877734742950928	-4.76594030813812
P00749	PLAU	-0.0802733826618032	3.45041032563285	-1.56231082729892	0.171955088198424	0.821444232041286	-4.76596961404031
P02452	COL1A1	-0.0902655079469923	3.39482512021786	-1.26269481013469	0.256017560377186	0.866252015734413	-4.7660696188072
Q9Y548	YIPF1	0.0792457315469594	3.34690641868668	1.31986911302468	0.237531882589532	0.863123154559365	-4.76647589959641
P41219-2	PRPH	0.219080957056655	1.44052258395079	1.31052588868066	0.240468350417027	0.863518733536854	-4.76659920851656
Q5JS13-1	RALGPS1	0.0550084211559242	3.23408426289391	0.23007176810077	0.826089451706348	0.990174912956998	-4.7666331758558
Q9NYQ6-1	CELSR1	0.0493995630814849	3.3015486726655	0.291138968822533	0.781273190230534	0.984572495588386	-4.76665675551708
Q8TF20-2	ZNF721	0.109423820492721	3.37102702007836	0.782414114740943	0.465300790821149	0.920036421177091	-4.76675579645938
Q9NRV9	HEBP1	-0.0808032246921154	3.216837535749	-1.68755797382674	0.145204412040967	0.802001738429253	-4.76712244111814
Q9UHK6-5	AMACR	0.100437054791825	3.34027219442228	1.05601098757648	0.333758764389952	0.887903892099456	-4.76723234303662
O95466-2	FMNL1	0.12749701148114	2.25732513499121	1.42264079055966	0.20731787351887	0.846483621946124	-4.76770715560797
Q8IYN0	ZNF100	0.0828723721596923	3.36467554871136	1.00397168481206	0.356192971444455	0.894655073510897	-4.76843456511995
Q8NFJ9-2	DPP3; BBS1	0.0935130963695403	3.22590336412302	0.744052061747903	0.486446697474933	0.927946740003831	-4.76915634788704
Q15697-1	ZNF174	0.0282282982218523	3.36505152100417	0.162933251102822	0.876207330277847	0.993681457020471	-4.77007175572533
P49917	LIG4	0.0608338910876836	3.17907756722052	1.60267209162811	0.162853767009144	0.809242066405688	-4.77027059446017
Q15477	SKIV2L	-0.0698903855636944	3.31191998696882	-2.0117862172083	0.093560237116706	0.762799297725153	-4.77032509109502
Q8TA86	RP9	0.0664777403926414	3.22395371093905	1.52412466913831	0.181011680743597	0.832068073496033	-4.77176847623419
Q5TCZ1	SH3PXD2A	-0.0903773881536874	3.25522711974087	-0.69925389838948	0.511970802676658	0.937041587013656	-4.77240131706606
Q96NY9	MUS81	0.0772741521432839	3.24503745820004	0.571338340871419	0.589623946012482	0.95868992070381	-4.77243742172196
P78357	CNTNAP1	0.126919775737776	3.37250157880977	0.960609474150654	0.375803326126197	0.898549931818952	-4.77251598057803
P17152	TMEM11	-0.071304746729229	3.23416130038061	-1.37397861775388	0.221155767240285	0.858240323582177	-4.77265916210979
Q99807-1	COQ7	-0.0941948678101876	3.26722859466248	-1.01526098560977	0.351224766707496	0.891905133692684	-4.77281373149686
Q9NXR5	ANKRD10	-0.0673124795358247	3.39267789851182	-1.36414599424754	0.224052870406557	0.858240323582177	-4.7731280994702
Q6ZRS2	SRCAP	0.054467213395105	3.24948615887842	1.91825235506528	0.106200962636391	0.777632288017464	-4.77368385631521
Q9Y3E7-3	RNF103-CHMP3; CHMP3	0.105553112893938	3.1953689120277	1.1586912729165	0.292927083397121	0.877699471876955	-4.77429832743268
O95336	PGLS	-0.0747653383425825	3.24212514289504	-1.69241928228955	0.144252056816069	0.802001738429253	-4.77534156316568
Q9UK45	LSM7	-0.0940105788066799	3.32489563194975	-1.56596302012834	0.171111893737229	0.821211202472615	-4.77575991869298
Q9H8G1	ZNF430	-0.0836111022305943	3.38623109731753	-0.56585623073633	0.59310405627871	0.959971068502716	-4.77655525789245
Q8N8N7-1	PTGR2	0.0696148775700054	3.2342258545988	1.21895983679748	0.271010401665191	0.874681539292867	-4.7776668037887
Q86Y39-1	NDUFA11	-0.192597437883585	3.3442956722352	-1.31783347823652	0.23816888923386	0.863123154559365	-4.77778656299354
Q96B02-3	UBE2W	-0.0868814878091741	3.24411312603332	-0.997410267492891	0.359106503400599	0.894655073510897	-4.77921542855663
P62263	RPS14	0.127532607147356	3.3998990436624	2.11373857168825	0.0815209131881067	0.745488057719842	-4.77937631760964
Q01658	DR1	0.0710769154635497	3.23905948656986	0.496797273563831	0.637952467766783	0.963885497419391	-4.77990212578857
O96007	MOCS2	0.0969647560278715	3.11598655582762	0.979833528140517	0.367005711761247	0.897303708695867	-4.7804446524826
P61088	UBE2N	-0.117773553332667	3.2480922337602	-1.848689069035	0.116710362826293	0.781328013615461	-4.78058189389486
P51398-1	DAP3	-0.10484579069358	3.30654577755335	-1.85263134108125	0.116087791015239	0.779922427471933	-4.78124570244566
O94889	KLHL18	-0.0775736255161195	3.28920207058876	-0.636906380212224	0.548954699430574	0.94725868865299	-4.78155377718757
Q9NSC2	SALL1	0.0656945019455199	3.37437288370207	1.64528390357616	0.153748650300747	0.809242066405688	-4.7816558392293
Q5FWF5-1	ESCO1	0.0789138314428888	3.36558991671088	1.35197210191236	0.227687822603463	0.862421568185888	-4.78173338321552
Q99608	NDN	0.0608418555530741	3.46275453696207	1.33334226415006	0.233354435866155	0.863123154559365	-4.78212179226974
Q93084-5	ATP2A3	0.0809298850186597	3.02392991606332	0.899537070952109	0.404855862434146	0.907440161583258	-4.78253871726296
Q5T1C6	THEM4	-0.0406802342221938	3.17527981253027	-0.265502782069358	0.799985704406433	0.984572495588386	-4.78337694544667
Q969U7	PSMG2	-0.0522175498800126	3.34997143888303	-1.52859100987283	0.179929449008628	0.830969706307806	-4.78504703330177
O60704	TPST2	0.0868251904673778	3.33455818520918	0.922812722791508	0.393584819867542	0.901899270999221	-4.78602492912682
Q460N5	PARP14	-0.0428527486993686	3.41915573819689	-1.78793849998659	0.126736571823914	0.798617549444283	-4.78617468431388
Q6EMK4	VASN	-0.10780532246574	3.42183914926615	-1.09874092208738	0.31622082665142	0.884819028807706	-4.7877657500426
Q96HY7	DHTKD1	-0.0746181817244797	3.2471150174448	-1.9565144177158	0.100832724911401	0.777418231545286	-4.78788516961607
Q9NYB9	ABI2	-0.050703671324106	3.35005965206343	-1.56277359767039	0.171848027598999	0.821444232041286	-4.78805739467561
Q6NXT1-1	ANKRD54	-0.0844100690668984	3.07299642633291	-0.829043130494028	0.440491133127614	0.910656958597428	-4.78914438399163
Q9Y606	PUS1	-0.0688230660037186	3.36851065573438	-1.84538677372227	0.117234439093762	0.782903201393225	-4.78938100276435
Q96T68-1	SETDB2	0.0386646389421805	3.36809524945071	0.261013282896023	0.803278349298679	0.984572495588386	-4.79033923864145
P11766	ADH5	-0.0897575345687887	3.34024748000509	-2.04674228447335	0.0892392659059588	0.75221525295928	-4.79199283662583
O75390	CS	-0.0660911413768745	3.23389441183068	-1.88386367940065	0.111271733456767	0.777632288017464	-4.79228097428115
O75489	NDUFS3	-0.0914672072514702	3.29427638201279	-1.26026618724483	0.256830467499656	0.866382458306416	-4.79238058873365
P06276	BCHE	0.0796506974082863	3.29554309117547	1.1952335982994	0.279462220310696	0.876864111598756	-4.79255922032412
P30044-1	PRDX5	-0.0747404929133555	3.16954315781348	-1.98673119467502	0.0967883225143866	0.76908064873031	-4.79352482163611
P61224-1	RAP1B	0.140907703790295	3.3383241275855	1.48828475228931	0.189921634373177	0.842458239693728	-4.79356187005767
Q9H777	ELAC1	-0.0811792226560941	3.31647860078439	-0.950340033861864	0.380570928117515	0.898549931818952	-4.79362474497112
Q14449	GRB14	0.0127996877045392	3.23961838894689	0.0744942095229334	0.943168718146396	0.995798520149203	-4.79379620814048
Q16890-1	TPD52L1	0.0933231305434839	2.97871247831922	1.29398443917356	0.245747358574835	0.863518733536854	-4.79407327229523
P55735-1	SEC13	0.07028955309893	3.27536271834386	2.04020187584496	0.0900319162649293	0.752818406254708	-4.79426315174508
Q8N350	C19orf26; CBARP	-0.0806815373816825	3.33401998279019	-1.16882320676593	0.289138791757127	0.876864111598756	-4.79447280509232
P27986-4	PIK3R1	0.0889045596843653	3.09866166671789	1.34371130025866	0.23018488881459	0.863123154559365	-4.79466242876617
Q9Y2L5-1	TRAPPC8	-0.0308170390678917	3.34210722161534	-2.05640513293308	0.088081267889695	0.75221525295928	-4.79517866933531
Q14005-1	IL16	0.262780384761059	1.16243221690081	1.69407408293922	0.143929267835641	0.802001738429253	-4.79588879053686
Q9UBX1	CTSF	0.0897598892751889	3.22628793676991	1.19568735962903	0.279298450154686	0.876864111598756	-4.79602927199119
Q9UBS0	RPS6KB2	-0.0237325054490863	3.20314982955553	-0.146158438327982	0.888840225674325	0.993681457020471	-4.79723218113821
Q969P6	TOP1MT	-0.0754805104819177	3.3681362733261	-0.957185854666439	0.37738748011365	0.898549931818952	-4.79740002180429
Q02224	CENPE	0.0427493237965191	3.36717116811516	2.28769153943918	0.0645429951786405	0.721248879242078	-4.79753468264576
Q9Y547	HSPB11	-0.067690501976468	3.35674854722091	-1.35635763993446	0.226372211544993	0.860618239332599	-4.79776957955617
P60983	GMFB	-0.117604640556482	3.28444081667219	-1.31357535946762	0.239506359111636	0.863518733536854	-4.79845549419114
P49427	CDC34	-0.10508087354733	3.26847077993043	-1.60408564093581	0.162543551973158	0.809242066405688	-4.7986213282389
Q9Y6G9	DYNC1LI1	-0.0331177650941996	3.32826011700659	-2.14304625572724	0.0783641132773486	0.739495051739014	-4.79904937962046
Q969G6	RFK	-0.062848062347447	3.00614386057514	-1.44974644170452	0.199961778689229	0.844295969579547	-4.7994215256248
O43665-3	RGS10	0.0647100220722926	2.67796530898372	1.22785956758846	0.267898287443086	0.874681539292867	-4.79965634614178
Q96CN4-2	EVI5L	0.0765821969674347	3.21367519760103	1.20229776584365	0.276922095341976	0.876864111598756	-4.7996983936724
Q9H0H0	INTS2	0.0463694670784839	3.29476636903428	1.88794068325341	0.110658040701895	0.777632288017464	-4.79978493406294
Q9NQB0-5	TCF7L2	0.21317043953399	3.27210503025035	1.37299520703841	0.221443970802518	0.858240323582177	-4.79980969230808
Q9UBV7	B4GALT7	0.0919384860185754	3.35581540581077	1.17634123967828	0.286355176745635	0.876864111598756	-4.80124072373435
P51151	RAB9A	0.112868863459385	3.29261555995919	1.46724203282739	0.195343685794396	0.843632815050238	-4.80155105015722
Q99708-2	RBBP8	0.0518830174536353	3.34341821877088	1.5114061968306	0.184127352904642	0.836367703661584	-4.80175983691536
Q8IZL8	PELP1	0.0511148721696793	3.3595608024729	2.20273193897536	0.0723207054201882	0.734642875539009	-4.8022733729732
P17900	GM2A	0.0696609743948349	3.23242431454535	1.3972544805554	0.214434081658401	0.852403251027593	-4.80293088064632
Q499Z4	ZNF672	-0.100716582898632	3.38441459236472	-0.6264878309887	0.555297303194807	0.948977356239023	-4.80318839083836
Q8IX04	UEVLD	-0.0758303761048205	3.17826218693602	-0.977028461204534	0.368279101352954	0.897303708695867	-4.80422368907111
P52943	CRIP2	0.0757519088079456	3.14977744187133	0.779814525089564	0.466712849903425	0.920036421177091	-4.80447773843156
P17010-3	ZFX	0.0828865980057587	3.25158679394559	0.729836010851665	0.494450035560785	0.927946740003831	-4.80448065314236
Q05DH4	FAM160A1	-0.0774943590890481	3.38894444420159	-1.32980667622119	0.234444187294644	0.863123154559365	-4.80485249926246
Q15386-1	UBE3C	0.0418848941198526	3.16841934896511	1.80397881366809	0.124008841230703	0.793913864270319	-4.8050259211394
Q9H8H2	DDX31	0.0889006405335844	3.34055994485454	1.89094121337394	0.110208560450724	0.777632288017464	-4.80505249905536
Q9H0H5	RACGAP1	0.0726566873745508	3.30456989509836	1.90163552670082	0.108621444844579	0.777632288017464	-4.80507593550248
Q9UK53-1	ING1	0.061735166585033	3.37148066156889	1.26996696274635	0.253597085636838	0.866252015734413	-4.80566031139524
O14548	COX7A2L	-0.100320267499183	3.324507840776	-1.10014585446781	0.315657531613174	0.884819028807706	-4.80585683931404
Q6P1M3-1	LLGL2	0.047772448239808	3.40178449379423	1.76163058533225	0.131339745668321	0.80153112064763	-4.80648588246931
Q8N5I2	ARRDC1	0.0815818997211601	3.17671569348872	0.846463924397225	0.431474909516458	0.908951511719062	-4.80715383388532
Q9NNW5	WDR6	-0.0467096179367848	3.31512576438256	-1.92467026568441	0.105280740389321	0.777632288017464	-4.80784940892569
Q9NVR0	KLHL11	0.0517214111419593	3.29459287118928	1.61294104498144	0.160613071655812	0.809242066405688	-4.80842953113381
Q9Y2Z4	YARS2	-0.0907645815977242	3.29158179614933	-1.64233284330411	0.154363017864604	0.809242066405688	-4.80960654169589
Q8WYJ6-1	SEPT1	0.241472073187905	2.29664242520374	1.45122998982906	0.199566263422485	0.844295969579547	-4.80994559284283
P46781	RPS9	0.031980471488882	3.37467002347506	2.12057305802119	0.0807731929016383	0.745488057719842	-4.81004780462566
Q86U38	NOP9	0.0702447233450721	3.33874769680047	1.74462109248632	0.134403542279295	0.80153112064763	-4.81018574608051
Q8N720-3	ZNF655	0.0778711243277554	3.35731962632317	1.0689185695754	0.328377813729529	0.88685342237452	-4.81022162341071
P52565-1	ARHGDIA	-0.0834545988765655	3.12236320749279	-1.86683382740189	0.113872356832202	0.777632288017464	-4.81031321698
Q9Y2Q3-1	GSTK1	0.0665349924652782	2.84822083653524	1.68607083512966	0.145496975157441	0.802001738429253	-4.81053938573397
Q08170	SRSF4	-0.0670863360311933	3.24559928007143	-1.88510386267407	0.111084692999797	0.777632288017464	-4.8111027299661
A8MQ14	ZNF850	0.0349934879792557	3.33970893966782	0.178925450510671	0.864201319883965	0.993681457020471	-4.81117700714232
O60512	B4GALT3	0.0787045918527477	2.97980197371321	1.32197843389711	0.236873440673877	0.863123154559365	-4.81248028343251
Q53S58	TMEM177	-0.091829790809467	3.32064238542874	-1.061432835899	0.331489668760984	0.887903892099456	-4.81369679553145
O60344-4	EEF1AKMT4; ECE2; EEF1AKMT4-ECE2	-0.103052129994407	3.17544470021757	-1.05988158065931	0.332137577619036	0.887903892099456	-4.81372434229442
Q9HAU4	SMURF2	-0.0307981923762846	3.31491594949742	-0.219336831706835	0.834049180152272	0.990286336770501	-4.81416980547234
Q9UEE9-1	CFDP1	-0.0413584175712754	3.29831768595963	-1.74339605128414	0.134626902218746	0.80153112064763	-4.81426585502116
Q86X02	CDR2L	0.0546442969507632	3.33151919336457	1.52938951239812	0.179736612945411	0.830969706307806	-4.81521493939805
P13612	ITGA4	0.0816736541119001	2.66576255036363	1.2346515313579	0.265544398217933	0.874474375536181	-4.81570216432224
Q15003	NCAPH	-0.0416684341028258	3.33290912103791	-2.0066556196791	0.0942122014590754	0.764153550100263	-4.81587117723718
Q9NX20	MRPL16	-0.0801766242406537	3.30897782486098	-1.27171395410844	0.253018655902606	0.866252015734413	-4.81615308362819
Q9H568	ACTL8	0.109526310329868	3.40328031878956	1.0735976661623	0.326445029837436	0.88685342237452	-4.81627588566503
A0AV96	RBM47	-0.0521752912863412	3.40571927728587	-1.88230035710148	0.111507959892706	0.777632288017464	-4.81713207083842
Q9NVV9-1	THAP1	0.0658405441348283	3.36037681163925	1.3726092991893	0.221557160928288	0.858240323582177	-4.81806653490608
O75116	ROCK2	0.0756101371070484	3.30156318399029	2.11852548426577	0.0809964598066116	0.745488057719842	-4.81828061764438
Q6DT37	CDC42BPG	0.0625623632101697	3.36436845288157	1.44817094970583	0.200382606630708	0.844295969579547	-4.81846845116007
Q96GJ1	TRMT2B	-0.0726467542230316	3.2539689235541	-1.05130560293263	0.335738392956554	0.888627697645208	-4.81876543312069
P54136-1	RARS	0.0657213681629828	3.30985348117889	1.45625047910274	0.198233205550046	0.844295969579547	-4.81888124346535
Q16352	INA	0.0614522929896996	2.68864351701827	1.58331912529284	0.16715859702796	0.816501821694996	-4.82036245982338
O75886	STAM2	-0.0809266731214599	3.25254265817603	-1.26645755285889	0.254762610827398	0.866252015734413	-4.82043009574722
Q96R05	RBP7	-0.0967723448194	3.32762017029974	-0.843003254233683	0.433255034292761	0.908951511719062	-4.82052245404514
P42336	PIK3CA	0.0818358738347431	3.12130598143975	0.748124005461658	0.484170879393632	0.927910071241258	-4.82081035216376
Q8NF50-1	DOCK8	-0.02046171017484	2.23972111084226	-0.107988208416719	0.917714707380091	0.994246356863115	-4.82163417702878
Q86V97	KBTBD6	-0.0669871761756154	3.17390773528492	-1.33168436740452	0.233864866080633	0.863123154559365	-4.8221213448726
Q9H707	ZNF552	0.0673241114180791	3.33361436338216	1.46175336676219	0.196781616565511	0.844295969579547	-4.82221039119596
O95865	DDAH2	-0.0658903141039041	3.34769778700851	-1.68452223909088	0.145802240515631	0.802001738429253	-4.82277089969194
Q9NQT4	EXOSC5	0.056288006747143	3.31259130381324	1.71877017531909	0.13919519782128	0.802001738429253	-4.82327340546253
Q9UIJ7-1	AK3	-0.0917681879379673	3.20890874131895	-1.64094993939153	0.154651736480427	0.809242066405688	-4.82331833390994
Q99550	MPHOSPH9	0.14799663351955	3.35819416412469	0.658697642384299	0.535837787631446	0.943188592859192	-4.82403197942416
Q9NZ72	STMN3	-0.0710194841218335	3.33787763619831	-1.09897748481336	0.316125919869912	0.884819028807706	-4.82424529417331
Q92544	TM9SF4	0.108999395964653	3.28402704595611	1.7726491829906	0.12939198039684	0.80153112064763	-4.82431218083305
P43246-1	MSH2	-0.0730976333427255	3.37127827482475	-2.24403564640316	0.0684239980223968	0.727771020609183	-4.82618363698796
P07738	BPGM	0.0642409019305386	3.11610033061589	0.569946757179295	0.590506196773938	0.958987589947093	-4.82663767635398
P11441	UBL4A	-0.0804683883493145	3.1897150613638	-1.68737632595207	0.14524011659368	0.802001738429253	-4.82816798498865
O43424	GRID2	0.0769006732688219	3.4750870168193	0.808889023604887	0.451093713174246	0.915617901389647	-4.82954084787679
Q96FX7	TRMT61A	0.0554159957065341	3.28819450146995	1.4983717847674	0.187372976070635	0.840631487299337	-4.83070164602948
Q9C0G0	ZNF407	0.0964263561599548	3.33306879286201	1.17492784137191	0.286876726652027	0.876864111598756	-4.83071920949262
Q86Y38	XYLT1	0.0841913821732643	3.34632636714785	0.932412354252581	0.389007648439736	0.901899270999221	-4.83075179389063
Q92830-1	KAT2A	0.0500756376939598	3.31021501397753	1.61692616486877	0.159751543008991	0.809242066405688	-4.83127776022591
Q674X7-1	KAZN	0.0850425080811924	3.30597261217793	0.837679638529369	0.436004048337256	0.909467933345141	-4.83133161813034
O14544	SOCS6	0.0732115040833484	3.40244771223195	1.06634718241382	0.32944400950299	0.88685342237452	-4.83148037766957
O43822-2	C21orf2	0.076696748836668	3.29593829166022	0.919791724419763	0.395033867677483	0.901899270999221	-4.83166455047069
Q92989-1	CLP1	-0.0402135575481195	3.35130091713563	-1.71505635202906	0.13989723422397	0.802001738429253	-4.8320337985028
Q9BXB1	LGR4	0.0688231078925959	3.40353393123167	1.24668893097463	0.26141733708279	0.871587643047495	-4.83259091814995
Q9Y3C4-3	TPRKB	-0.0737717335680551	3.24119242906914	-1.25724641220183	0.257844439175333	0.867623919891734	-4.83345330952813
Q5EBL8-2	PDZD11	0.0947482187162512	3.37722254140793	1.40955343887184	0.210958762363526	0.848929620481218	-4.83385839060419
Q86VR2	FAM134C; RETREG3	0.0857533911412957	3.33941312289813	1.20463202096759	0.276087179304808	0.876864111598756	-4.8345487697342
Q96CW1	AP2M1	0.0420732133538159	3.38839886051571	2.0029407836543	0.0946871519257447	0.764153550100263	-4.83476888120259
Q6ZNW5	GDPGP1	-0.0735955347378218	3.33248747193288	-0.732300274236718	0.493056262273323	0.927946740003831	-4.83531372770498
Q96E11	MRRF	-0.0724683493071415	3.28884427117829	-1.51711293946952	0.182723133368229	0.833875202501698	-4.83532965537145
Q96BT3-1	CENPT	0.0623216296725898	3.28776182233324	1.34580577878656	0.229549426247706	0.863123154559365	-4.8361023161203
Q13432	UNC119	0.0698422662849026	3.32493512568303	1.24960700931263	0.260425435839884	0.870430160894381	-4.83655415116994
Q96MM6	HSPA12B	0.0795901343744875	3.42455335592268	0.864604501662205	0.422232588065137	0.908951511719062	-4.83693142541244
Q7Z5J4	RAI1	0.0574121076331413	2.80784379973359	1.44378785172893	0.20155771826774	0.844769364487011	-4.83747207368756
P63172	DYNLT1	-0.0589113779585804	3.35899622356743	-1.28971899000721	0.247125382890548	0.86360910680431	-4.83792476451461
Q8NEB9	PIK3C3	-0.0432126821152484	3.33429675052778	-1.8959423315598	0.109463471145443	0.777632288017464	-4.83801787534021
Q96S86	HAPLN3	-0.0596731223690565	3.41906273086464	-1.45844259516771	0.197653759257684	0.844295969579547	-4.83823096664774
Q9BQ15-1	NABP2	0.0560046619926913	3.32369112256916	1.45926141006796	0.197437726604758	0.844295969579547	-4.84052550674696
O75071	EFCAB14; KIAA0494	0.0410082810796596	3.39567928171085	0.230389468195356	0.825854227403406	0.99014746564134	-4.84058417009582
Q9H4H8	FAM83D	-0.0434964416466809	3.40519058530291	-1.821143607567	0.121154533188146	0.793913864270319	-4.84135098390903
Q6UN15-1	FIP1L1	0.118281931092064	3.3289120692165	1.82592649609507	0.120370920037032	0.793913864270319	-4.8419188213325
Q13325	IFIT5	0.0553924384196657	2.77409599915567	1.52453714811219	0.18091147556582	0.832068073496033	-4.84231662517593
Q7L2Z9	CENPQ	0.0524571804844251	3.34260023111052	1.6124197333798	0.160726102997977	0.809242066405688	-4.84351831706006
P02792	FTL	0.0409726907011104	3.37773608829207	1.68449512712173	0.145807590499973	0.802001738429253	-4.8435451806682
O75161	NPHP4	0.0656354986343436	3.38345685679939	0.626918056025527	0.555034483921355	0.948802263958251	-4.84371181097393
Q9H9D4	ZNF408	-0.0556985528420668	3.35771940187392	-0.414065195444959	0.693991911125012	0.973282824714523	-4.84391337713344
Q16401	PSMD5	-0.056251253556916	3.27684807769127	-1.57289649888643	0.169521999349279	0.819516558921025	-4.84396338004544
Q15051-1	IQCB1	0.0520678764452905	3.28897116856478	1.63028609296997	0.156895737653138	0.809242066405688	-4.84511009875431
Q15928	ZNF141	0.0727548265274618	3.37177394665418	1.16834302443633	0.28931737340029	0.876864111598756	-4.84631244432313
Q9Y4X0	AMMECR1	0.0669659658093679	3.40359722185006	1.0894859781928	0.319952632408713	0.885714488764107	-4.84671167471482
Q96C19	EFHD2	-0.0464698899773958	3.28533832015624	-1.60620960889762	0.16207849903846	0.809242066405688	-4.84693329381142
Q86TV6-2	TTC7B	0.0600449267221612	3.22399024376179	1.50166237324704	0.186548548812251	0.838627113523051	-4.84716372660197
Q96I25	RBM17	0.0377808477526969	3.31912113444421	2.04555618928598	0.0893824794501928	0.75221525295928	-4.84796091072343
Q8WUZ0-2	BCL7C	0.0616918763510069	3.32086263605201	1.36848238967827	0.22277093473523	0.858240323582177	-4.84902541836592
Q8NFC6	BOD1L1	0.0354585140281127	3.33087382280407	2.29102814814081	0.064256016090865	0.721248879242078	-4.84990094945595
Q9HCM9	TRIM39	0.0703545075263009	3.41370336363203	1.37435367579084	0.221045941257249	0.858240323582177	-4.84994559903204
O43670-4	ZNF207	-0.0475401240329424	3.33752952237745	-1.87177634007704	0.113111363505167	0.777632288017464	-4.8499843740082
Q15649	ZNHIT3	0.0559488640936369	3.33979248989742	1.34783741088904	0.228934555534164	0.863123154559365	-4.85003030618209
P37275-2	ZEB1	0.0043750549130708	2.9670400752784	0.0320558279303729	0.975523096574752	0.998093753621307	-4.8500516083135
O15169	AXIN1	-0.0651321037148904	3.3855444679265	-1.28818277499003	0.247623374951272	0.863922934345683	-4.85031174875601
Q86V87	FAM160B2	-0.0672456235300252	3.2745728261837	-0.679562647824503	0.52346963935394	0.941276345186089	-4.85097516089846
Q8N9M5	TMEM102	-0.07913156270474	3.25085972769021	-0.717025831744387	0.501738808200345	0.93026744179963	-4.85128317533363
Q6PCE3	PGM2L1	-0.053236980439847	3.43759673763053	-1.986361480071	0.0968367970116631	0.76908064873031	-4.8514635989448
O75570	MTRF1	0.137503668561591	3.42279547639622	1.03575992297689	0.342347508330434	0.890060642277851	-4.8519269540036
Q13287	NMI	0.0717501481814685	2.81315211005008	1.00097874422815	0.357519584575904	0.894655073510897	-4.85248605528987
Q9Y2F5	KIAA0947; ICE1	0.0387378053694962	3.40054050312618	1.84527765808527	0.11725179593337	0.782903201393225	-4.8525031991327
Q8NFH8-1	REPS2	-0.074841033595194	3.44783335176046	-0.752887158341729	0.481518146667409	0.925866471486807	-4.85279451989138
O43766-1	LIAS	-0.0676656270367708	3.32322164802728	-1.27798576850702	0.250951727653763	0.866252015734413	-4.8529780498988
Q93073-1	SECISBP2L	0.0684753002508759	3.27814294880147	1.12068908699731	0.307516945522883	0.882509719656767	-4.85302643037472
Q9NPA5-1	ZFP64	0.0694118549340776	3.33258065513561	1.05575655772684	0.333865560124444	0.887903892099456	-4.85310831570821
Q6P0Q8	MAST2	0.0652026405391296	3.29559752013741	0.637511246470003	0.548587879544291	0.94725868865299	-4.85347484108488
Q8N2K1-3	UBE2J2	-0.103798266164733	3.37957415257513	-1.17148561774755	0.288150353815866	0.876864111598756	-4.85426059598095
O43309	ZSCAN12	0.0779596343519136	3.29658607799997	0.677115993694257	0.524910186836156	0.942510648263112	-4.85439815749676
P61962	DCAF7	0.06174231501578	3.24631686484194	1.51962494830389	0.182108237597811	0.833875202501698	-4.85586127040875
Q00059	TFAM	-0.0996256508610305	3.28754997870961	-1.76805944867852	0.130199814344439	0.80153112064763	-4.85586288695711
O75911	DHRS3	-0.0658082021316859	3.26298367648965	-0.660836479944202	0.534561303963666	0.943188592859192	-4.85598137428147
O14562	UBFD1	-0.0538699031190425	3.32658517177137	-1.75254295161032	0.132967957707788	0.80153112064763	-4.85615277581309
O00330-1	PDHX	-0.0730008620223993	3.32421952415838	-1.6105010420623	0.161142776593794	0.809242066405688	-4.85742579168319
Q16566	CAMK4	0.0743212824692805	3.09259240771952	1.50322512200311	0.186158215633987	0.838627113523051	-4.85814386173904
Q96A19	CCDC102A	0.0384909251227021	3.11811832549094	0.302586462955311	0.772968665018205	0.983764030066716	-4.85842056625848
Q9BRK4	LZTS2	0.044825138532398	3.37532439094031	1.55279759678209	0.174170104674221	0.825854785575171	-4.8591287290433
Q9BT40	INPP5K	0.050504209176702	3.30549989897244	1.49308121972083	0.18870568256109	0.842204768242397	-4.86012387980375
O43293-1	DAPK3	-0.0554977044923636	3.42648707676262	-1.71942019020023	0.13907267944947	0.802001738429253	-4.86050063597192
O60299-1	LZTS3; PROSAPIP1	0.0739242831450297	3.4631473988512	1.23091897939449	0.266835725835218	0.874681539292867	-4.86084260294313
Q9H009	NACA2	0.0809255244171658	3.28561016110394	0.737345430149284	0.490211175990466	0.927946740003831	-4.86099638636222
Q9NVP1	DDX18	0.0619556551513182	3.38702933835292	2.42513049096479	0.0537655347375223	0.719760399457179	-4.86107153037418
Q9NYM9	BET1L	0.078079109580523	3.36727132619915	1.0828434268623	0.322653727539541	0.88685342237452	-4.86135660046138
Q92546	RGP1	0.0691905342359875	3.315976970244	1.0886181179339	0.320304457565086	0.885714488764107	-4.86174121612484
Q14790-9	CASP8	0.0543536279492202	2.48022040220191	1.37963693500304	0.219504177190542	0.857961632171802	-4.86194720526373
Q8TAM2-1	TTC8	0.0663754442487407	3.07805896725608	1.15425425479208	0.29459944774487	0.877734742950928	-4.86205738611771
O60779	SLC19A2	0.0796152004328664	3.40339785932326	0.463305119887534	0.660349085826278	0.968119758486411	-4.86221042469801
O95873	C6orf47	0.0687487107472661	3.39754116887983	0.759829264499984	0.477670079285731	0.924745258809059	-4.86224501678435
Q9ULI0	ATAD2B	0.0461642544329395	3.35071372792211	2.0540628821978	0.0883605411215785	0.75221525295928	-4.86244754296063
Q49AG3	ZBED5	0.0557994895289202	3.39803289355021	1.57333795440369	0.169421250550635	0.819516558921025	-4.86282393369818
Q16666-1	IFI16	0.406801794539135	1.13922907551511	1.6338860992865	0.156134684104046	0.809242066405688	-4.86293265047602
P60953	CDC42	-0.0892853593969747	3.25007724160793	-1.61079050414748	0.161079848785255	0.809242066405688	-4.8647332301107
Q9Y484-3	WDR45	0.0520055007396573	3.30629815487527	1.57494143939706	0.16905578578591	0.819430384288872	-4.86480795736387
O75127	PTCD1	-0.0908717867741372	3.30458233342739	-1.52496892424755	0.180806638778803	0.832068073496033	-4.86518788541491
Q92628	KIAA0232	-0.0728962911180771	3.35884399317866	-1.04698132281291	0.337566206580022	0.888627697645208	-4.86610306034371
Q9Y399	MRPS2	-0.121882936892284	3.31600313950767	-1.56762964737148	0.17072842796533	0.820694548464919	-4.86619345323535
Q96CB9	NSUN4	-0.108471383112103	3.25628118562329	-1.26498550509324	0.255252915502831	0.866252015734413	-4.86689358933237
Q5T447	HECTD3	0.0547419661763861	3.22611128803757	1.66725996797405	0.149247628711638	0.806678254139263	-4.86696344239674
Q13884	SNTB1	0.04467850368093	3.39222818682332	1.798683824414	0.124902767749515	0.793913864270319	-4.86718145081818
Q9HAN9	NMNAT1	0.0662094267021803	2.93822627850149	1.16248306488487	0.291504378539176	0.877028075353945	-4.86765006677059
Q8IY63-1	AMOTL1	-0.0629361707758285	3.2951471196993	-1.38555378727541	0.217789229894425	0.856975344387708	-4.86822038475012
P61163	ACTR1A	-0.0682820590613943	3.27036989765456	-1.53361415137813	0.17871963431985	0.830173883855703	-4.86890778090095
Q9Y6G3	MRPL42	-0.098764019093945	3.33754348489264	-1.47879579390122	0.192348916134945	0.843027939667053	-4.87001752281316
Q9Y6X5	ENPP4	0.0871740308088686	2.99528347897817	0.994730782344367	0.360301805381441	0.894655073510897	-4.87132756439684
Q9BY41	HDAC8	-0.0665263342491027	3.01133130312823	-0.72964915248167	0.494555831652712	0.927946740003831	-4.87256094865163
Q9H583	HEATR1	0.0476305635841913	3.37148250059464	2.39598684712609	0.0558807095317456	0.719917861872589	-4.87297500510243
Q8TDR0-1	TRAF3IP1	-0.0540739702553665	3.32262154236655	-1.37780472548209	0.220037733753102	0.858240323582177	-4.87367672288134
Q9NUU6	FAM105A	0.0236123708193559	3.31420076569038	0.168969590600592	0.871671104238595	0.993681457020471	-4.87392968731848
Q9HBL7	PLGRKT	-0.0959237840613433	3.24681665979131	-1.0095857747285	0.353715260426528	0.893484093255823	-4.87472094455999
P68402-1	PAFAH1B2	0.0668461830882002	3.328510081036	1.48464659140035	0.190848855655331	0.842458239693728	-4.87538943269467
Q9NRY2-1	INIP	-0.0351482443160277	3.28743505942694	-0.266707871963156	0.799102651726178	0.984572495588386	-4.87547865153282
P52741-1	ZNF134	0.0684672842895902	3.41229663570475	0.895873573848236	0.40665223257263	0.907440161583258	-4.87622476213961
Q86TS9-1	MRPL52	-0.154446939584541	3.33576572988447	-1.44987419516063	0.199927690753951	0.844295969579547	-4.87642155847987
Q9H0U6	MRPL18	-0.0786919356602219	3.29047315813167	-1.07375248678261	0.326381240379703	0.88685342237452	-4.87651258037512
Q7KYR7	BTN2A1	-0.0762866091113905	3.30253168186364	-0.744846250639097	0.48600224237515	0.927946740003831	-4.87714584715391
Q8NFU5	IPMK	-0.0564378096202652	3.33063939965273	-0.537244706504867	0.611460903205151	0.962391832702452	-4.87767408838213
Q8NG68	TTL	-0.0621898303973659	3.26796547403913	-1.29927482271021	0.244047784212985	0.863518733536854	-4.87850534629131
Q5VWZ2	LYPLAL1	-0.0914882401599026	3.17616517661136	-1.19086177125191	0.281044367547961	0.876864111598756	-4.8785693845318
O94925-1	GLS	-0.0719402006888898	2.92661568051308	-0.679108394266477	0.523736899323106	0.941450208905076	-4.87938119188701
P06454-1	PTMA	-0.171378645838669	3.19101801240561	-1.923037768449	0.105514046803002	0.777632288017464	-4.87985536366781
O15297	PPM1D	0.0904565633268099	3.23638194545856	1.2829222399724	0.249335480614156	0.865279342725527	-4.88008176803704
Q5H8A4-1	PIGG	0.0893041343550716	3.34194004431673	1.16428760250199	0.290829393198586	0.877028075353945	-4.88037229027875
Q9NPJ8-3	NXT2	0.0654021322632503	3.36661912255013	1.03864295630994	0.341113814319028	0.890060642277851	-4.88083601102592
Q5SQI0-1	ATAT1	-0.0542799799005959	3.27582317822164	-1.3548830297932	0.226813802619035	0.860636909514376	-4.88108189904515
Q8IXJ6	SIRT2	0.0794576900774597	2.80951782970084	0.979183996684876	0.367300260471188	0.897303708695867	-4.8814464820797
P00533-1	EGFR	0.0700547485987559	3.23408437687588	1.21572253439532	0.272150278550755	0.874681539292867	-4.88210875429261
Q9H165-1	BCL11A	-0.0558426635590414	3.20374297013805	-0.507657104975291	0.630778813136623	0.962818879242145	-4.8825290119174
P02649	APOE	-0.0512440474529737	3.4043598651333	-1.89951105956688	0.108934888755568	0.777632288017464	-4.88289028724644
Q765P7	MTSS1L	0.0568793713356124	3.38726857467393	0.478357950011463	0.650232766747667	0.966345193303871	-4.88321472349094
Q9UET6	FTSJ1	0.0485508358426208	3.33014698371365	1.49400920812851	0.188471276046533	0.842204768242397	-4.88336682204774
Q9BRX9	WDR83	0.0682738704721678	3.28882390661335	1.05711583184388	0.333295338318025	0.887903892099456	-4.88368156588154
P53794	SLC5A3	0.00187710656657293	3.32922887836083	0.0152885419134987	0.98832429535767	0.998093753621307	-4.88402137694122
Q9NRN9	METTL5	-0.0725117535962335	3.33453999345562	-1.57578241177791	0.168864413999006	0.819430384288872	-4.88429426592675
Q96M94	KLHL15	0.0746181413259182	3.28563086348428	1.11350368223655	0.310343882868466	0.882509719656767	-4.88431959566051
P35227	PCGF2	0.0721684602538971	3.38841545543006	1.71733364780155	0.13946633838196	0.802001738429253	-4.8844370704584
Q92564-3	DCUN1D4	-0.0660067046843581	3.36354436856909	-1.18435192524567	0.283414662951345	0.876864111598756	-4.88469083774173
Q9UHW9-2	SLC12A6	0.0915021701843483	3.02891411618654	1.14921380308843	0.296509177891929	0.87804473686682	-4.88608408028296
Q9H098-2	FAM107B	-0.10182013861212	3.07856746932457	-1.26906933866948	0.253894746979744	0.866252015734413	-4.88674027600785
Q96Q11-1	TRNT1	-0.0645241008251113	3.34922371908487	-1.68754563833149	0.145206836424123	0.802001738429253	-4.88757481618535
Q8NHP8	PLBD2	0.0487249305502996	3.36564219656216	1.74680507136723	0.13400624647298	0.80153112064763	-4.88895208964301
P32121-3	ARRB2	0.0560909224260704	3.29709645851074	1.6742315308023	0.147846720482251	0.804453928751655	-4.88988206295876
P06748	NPM1	0.410025426467014	2.8699968315122	1.28981174924296	0.247095342015675	0.86360910680431	-4.88993646077639
P55347	PKNOX1	0.0538300402475359	3.33419940564061	1.6366052840664	0.155562208936405	0.809242066405688	-4.89009759123917
Q13557-11	CAMK2D	-0.0629075756302356	3.26322000810029	-1.18859164132121	0.281868982756062	0.876864111598756	-4.89042276037366
Q15906-2	VPS72	0.0598435198912158	3.32878580482321	1.27923917195037	0.250540468180312	0.866252015734413	-4.89136537266624
O60306	AQR	0.0376665259772564	3.34580716710522	2.15787136247135	0.0768157034631144	0.736243234475022	-4.89180770611304
Q9ULR5	PAIP2B	-0.0540245922183169	3.34715397058971	-1.29103910345716	0.2466981605548	0.86360910680431	-4.89215460861656
Q14119	VEZF1	0.0713544779637245	3.33520397005982	1.02630953240222	0.346417084361852	0.891894850640453	-4.89225013205153
P49848-3	TAF6	0.0404503120702426	3.3374945318595	1.96791998421165	0.0992863315750178	0.772540300044155	-4.89320211883274
Q8ND90	PNMA1	-0.0731334712096616	3.333436431921	-1.13580390644319	0.301641549864506	0.881137055911465	-4.89321236586931
O75414	NME6	0.0600894939272465	3.2160897492003	0.629880180315221	0.553227075274087	0.948224648474345	-4.89341790740225
Q9H706	FAM59A; GAREM; GAREM1	-0.071101368623935	3.30032846174521	-0.804627520640154	0.453359147104925	0.916158277295149	-4.89414401290193
Q13435	SF3B2	0.0266470032775184	3.33373411639914	2.31181764788905	0.0624978299199067	0.721248879242078	-4.89419960720855
Q5TF21	SOGA3	-0.0722586333334364	3.17860712829446	-1.23700032974968	0.264734622751829	0.874098199383977	-4.89427384712067
O43760-2	SYNGR2	0.067459156904623	2.73451372620693	0.889996828027446	0.40954656502845	0.907440161583258	-4.89473390143026
Q9H7X7	RABL5; IFT22	-0.0634287007096616	3.298619759147	-1.25210210870567	0.259579953907697	0.869992658949833	-4.89498306314896
Q5TAP6	UTP14C	0.0110839234185605	3.33956042979357	0.0923434482349135	0.929592645588148	0.994954628481065	-4.89507425104619
O43752	STX6	-0.113965180588164	3.34367411948342	-1.44680807306078	0.200747309061252	0.844386027601706	-4.89529658298039
Q6N063-1	OGFOD2	0.0753516100563993	3.26665661107562	0.737815338017968	0.489946760326218	0.927946740003831	-4.89547193113453
O60337	MARCH6	0.0682342489734635	3.36519780549757	0.779902732468915	0.466664887043745	0.920036421177091	-4.8962433473921
Q6PIY7-1	PAPD4	0.0538579807423867	3.34101647635379	1.32231714938552	0.23676786159751	0.863123154559365	-4.89641910937603
O75618-2	DEDD	-0.00295323093720648	3.38509922795513	-0.021841131205716	0.98332094450323	0.998093753621307	-4.89675128979089
P52746	ZNF142	0.0144578412398544	3.37661728609095	0.105767405443922	0.919399447903417	0.994474821560622	-4.89773800294429
Q6IA69	NADSYN1	-0.0551978699364485	3.31841915109462	-1.34529135321702	0.2297053545154	0.863123154559365	-4.89822750173467
O00629	KPNA4	0.0554356095093148	3.36234166679686	1.81393035075047	0.122345957580893	0.793913864270319	-4.89833337819017
Q9P270	SLAIN2	-0.0525616762073778	3.3321408235192	-1.50179616378892	0.186515101284658	0.838627113523051	-4.89890039907147
Q6PHR2-1	ULK3	0.0708690292971386	3.04880459045003	1.2898232326358	0.247091623247746	0.86360910680431	-4.89988611460578
Q15717	ELAVL1	0.0426252956115202	3.33066917421759	1.94634417515615	0.102232232638089	0.777496785576642	-4.90019143055123
Q5VUD6-1	FAM69B	-0.00465523631793488	3.23124923642055	-0.0393437432782422	0.969961317611574	0.998093753621307	-4.90100094902381
Q8WUD1	RAB2B	0.0625025439506165	3.23790684988193	0.988411902978083	0.363133275581687	0.896430328893001	-4.90134511100737
O14734	ACOT8	0.105292503501721	3.25499616664857	1.10199396430399	0.314917832974603	0.884819028807706	-4.90137814007857
Q9BQ13	KCTD14; NDUFC2-KCTD14	-0.0597491804796655	3.45283081491102	-1.13743391075838	0.301013679663802	0.880769241182566	-4.90170210788307
O75096	LRP4	-0.0568693543893181	3.38315718015189	-0.599343164885013	0.572036210404026	0.952608606320347	-4.90184994137446
Q8NF64	ZMIZ2	0.0616721517514527	3.37307482527625	1.07636809522839	0.325305119289037	0.88685342237452	-4.90193570371869
Q9UFF9	CNOT8	-0.0676093065022078	3.29112329964912	-1.14627190301769	0.297628697269372	0.878571514217246	-4.90223102175761
Q9H501	ESF1	0.0403741199506001	3.34662989863117	2.04197554732728	0.0898162498682389	0.752260118983765	-4.90260943556492
Q8N4X5-4	AFAP1L2	-0.16539120636396	3.36236075551113	-0.927587633382099	0.391302905831488	0.901899270999221	-4.90303504337543
Q8N612-2	FAM160A2	0.0596648179610175	3.29910734082535	1.30679723076967	0.241649326512203	0.863518733536854	-4.90361755116688
O14639-1	ABLIM1	0.0630644512449709	3.28613368331536	0.747994686286743	0.484243042282879	0.927910071241258	-4.90420646598426
P78317	RNF4	0.0651786522667612	3.37536647366317	0.65657905123233	0.537104126445665	0.943188592859192	-4.90422117715956
O94955	RHOBTB3	0.0157567009106413	3.28221588301952	0.131044306010712	0.900253715912626	0.993681457020471	-4.90445438164283
Q9Y3D9	MRPS23	-0.0744830689556524	3.33822297546005	-1.57619547329234	0.168770493645288	0.819430384288872	-4.90526464906017
Q9GZV5	WWTR1	0.055485112651486	3.35187056049003	0.53490520324531	0.612976121486182	0.962391832702452	-4.90566707628489
P30711	GSTT1	-0.0557637373885506	3.43527813743104	-0.533554332384473	0.61385200332133	0.962391832702452	-4.9059836658967
Q01201	RELB	-0.0576935398459707	3.31291513967843	-1.21169059928563	0.27357581744768	0.875830890564334	-4.90637778644283
Q9BTV7	CABLES2	0.0731224961907309	3.28769702479975	0.879310042845397	0.414850022547094	0.907440161583258	-4.90641647512868
P49419-2	ALDH7A1	-0.0534138324875443	3.3530720895299	-2.09814897736396	0.0832533234107829	0.745488057719842	-4.90698310083827
Q9BRT3	MIEN1	-0.0622119075251063	2.85681513751104	-0.916535731663904	0.396600253914171	0.903687896652663	-4.90713714273498
Q8NFI3-1	ENGASE	0.0389901103933807	3.22489125000287	0.3452861813583	0.742294009391322	0.981537338857329	-4.90795992916646
Q9NQP4	PFDN4	-0.102492654777035	3.40080189990103	-1.45565126579125	0.198391872709363	0.844295969579547	-4.90852428752586
Q6PK18-1	OGFOD3	-0.0979031765713151	3.36253372741616	-0.759656294465022	0.477765695712163	0.924745258809059	-4.90915258102463
Q99418	CYTH2	-0.0649618907653286	3.41139057508695	-0.724916242445626	0.497240695352532	0.928804124508706	-4.90919721129715
P50748	KNTC1	-0.0274521935457956	3.35209063811996	-2.09544072211652	0.0835581294189316	0.745488057719842	-4.90931998921769
Q9NY33	DPP3	-0.0471016686964529	3.30217904403959	-1.89300724841214	0.109900136265185	0.777632288017464	-4.90942297199288
Q86VY4	TSPYL5	0.0742694541429609	3.43327151260996	1.04708376260036	0.33752281219689	0.888627697645208	-4.90991074246005
Q9GZT6	CCDC90B	-0.0273515215783313	3.30274933597561	-0.2334609088105	0.823581179045596	0.990053316175962	-4.91001813138184
Q9NRM7	LATS2	0.0710978478748006	3.40773966387405	0.955806530396541	0.37802719963069	0.898549931818952	-4.91147198213854
Q9BT92	TCHP	0.062491217892265	3.29297587889258	1.0088704063605	0.354030202845672	0.893484093255823	-4.91158731043268
Q8WV93	LACE1; AFG1L	-0.0786366462103936	3.32080502686269	-1.08665699593975	0.321100676214266	0.886145463279081	-4.91379535871102
Q9UBU6	FAM8A1	0.0826571345449447	3.23080265200577	0.571498179687142	0.589522659633724	0.95868992070381	-4.91417585156716
P42771-4	CDKN2A	0.289762539079182	0.826203827849772	0.95742773877476	0.377275384303667	0.898549931818952	-4.91430148928437
Q6P6B7-1	ANKRD16	0.0825133095252752	3.18079370165821	0.955447990132018	0.378193627725283	0.898549931818952	-4.91452415987471
Q9BSC4-1	NOL10	0.0387334423021855	3.34992360692917	1.90749882565169	0.107761081559428	0.777632288017464	-4.91469662095884
Q9BYN0	SRXN1	-0.0608012306400386	3.20733937337661	-1.17262096589246	0.287729735322609	0.876864111598756	-4.91520484701238
Q14789-2	GOLGB1	0.0507205463834026	3.29207533384096	0.4954885213777	0.638819953248805	0.963885497419391	-4.91570258424416
Q8TD16-2	BICD2	0.0472051952898324	3.2191488060746	1.77692525653865	0.128643819137165	0.800450430186804	-4.9157373741043
P28161	GSTM2	-0.0751707543624072	2.75448514113036	-1.25433255486511	0.25882620969471	0.869402224508675	-4.91690531936601
Q9BV19	C1orf50	-0.0615602834273226	3.27562881758675	-1.02170444206408	0.348414402513603	0.891894850640453	-4.91714541956473
Q6NZI2-1	PTRF; CAVIN1	-0.0554677938396636	3.35856318372838	-1.23845161742087	0.264235362847288	0.873799010243275	-4.9172019306345
Q99666	RGPD6; RGPD5	0.0489118711008449	3.37238014708061	1.59402557495526	0.164763749386524	0.814115969609144	-4.91784226127704
Q01995	TAGLN	0.152505232687047	3.47915637692879	1.95192304394591	0.101462113773144	0.777418231545286	-4.91865415335952
P56537-1	EIF6	0.0584355043495254	3.33464667792601	1.75487767106437	0.132547758169965	0.80153112064763	-4.91919001578144
Q13813-3	SPTAN1	0.066113806143304	3.37867042320097	1.12733036471647	0.304923506335759	0.881760539741648	-4.91973778845934
Q5JSH3	WDR44	-0.0612300918949312	3.35145051912882	-2.1240368016355	0.0803969532852884	0.745488057719842	-4.91986617031361
Q9NX31	C20orf111; OSER1	-0.0655852606836195	3.24252164787436	-0.78285222158746	0.465063117438716	0.920036421177091	-4.92016229834549
O60749	SNX2	-0.0396227667406344	3.30087277697061	-1.87772129513835	0.112202785211701	0.777632288017464	-4.92111803178071
Q8WWB7	C1orf85; GLMP	0.0546683204156319	3.24691824287489	0.528566261889046	0.617092302839996	0.962391832702452	-4.92163776462485
Q9H299	SH3BGRL3	-0.0567964499195496	3.25652355722655	-1.16794807044773	0.289464329519463	0.876864111598756	-4.92187530243182
Q13257-1	MAD2L1	-0.101833880139302	3.10233382880515	-1.46822915357367	0.195086123866877	0.843632815050238	-4.92226253341976
Q9Y576	ASB1	-0.0648925850880735	3.34432665969809	-0.898635448438958	0.405297402275717	0.907440161583258	-4.9234746193426
Q8IWY8-1	ZSCAN29	0.0551803085451864	3.42132773351589	0.50838642189059	0.630298632534667	0.962818879242145	-4.92398231043255
Q6P4R8-2	NFRKB	0.0370659687334236	3.32704710006694	1.92344406100778	0.105455933195006	0.777632288017464	-4.92425236072858
Q15435	PPP1R7	-0.0367485229787828	3.27815691619651	-1.82819970847031	0.120000258574542	0.793913864270319	-4.92481767643902
O94788-1	ALDH1A2	0.0525987426611242	2.66468022993477	0.428211752691097	0.684242249406032	0.971315785365755	-4.92484908185174
Q9P289	MST4; STK26	-0.0922315447574989	3.34856525973971	-1.6118732792541	0.160844668096717	0.809242066405688	-4.92496101833856
Q96LT7-1	C9orf72	0.0583621696125697	3.19271031984462	1.30332713203974	0.242753094078215	0.863518733536854	-4.92579060153985
O75553-5	DAB1	0.0709494716514089	3.40918959868002	1.01648545087043	0.350689294738267	0.891905133692684	-4.9261134315768
Q9BXW7	CECR5; HDHD5	-0.0682581383617171	3.21291770855623	-1.61125345326753	0.160979254873749	0.809242066405688	-4.92654573183871
Q96IR2	ZNF845	0.143558785365889	3.34362863756453	1.21167488682942	0.273581385523994	0.875830890564334	-4.92701081378857
P49336	CDK8	0.0693390370010377	3.3471667189349	0.996072943086432	0.359702676418143	0.894655073510897	-4.92727169658996
O60294	LCMT2	0.0693622457174777	3.28014333576759	1.23066832243514	0.266922641699502	0.874681539292867	-4.9283697053642
O75064	DENND4B	-0.0713942527110803	3.26934313226008	-0.99857606395972	0.358587445582798	0.894655073510897	-4.92888961853364
Q9HAW4	CLSPN	0.0363990695636614	3.33034012542572	1.81198760449119	0.12266883407206	0.793913864270319	-4.92928887147742
Q8NDA8-1	HEATR7A; MROH1	-0.0665332370684325	3.1225942576022	-0.529955268765388	0.61618902468624	0.962391832702452	-4.9297426473802
Q9HAZ1	CLK4	0.0813614628980546	3.3570281650659	1.17288040052079	0.287633695580102	0.876864111598756	-4.930263994627
Q9UDV7	ZNF282	-0.0228491649393267	3.29650053952367	-0.198022547283864	0.8499171579918	0.992251849888933	-4.93047223769406
Q8WUD4	CCDC12	-0.0672799496806534	3.34130055704514	-1.51358130766061	0.183590938664464	0.834919787453331	-4.93106634067764
Q15637-6	SF1	0.0746420212834889	3.38399711047369	0.982973331572785	0.365584535381158	0.897303708695867	-4.93127588093225
O75448	MED24	0.0394732151802543	3.35854683985033	1.69455106141524	0.143836358582281	0.802001738429253	-4.9315659165559
P40121	CAPG	-0.0879490201864298	3.45332808042751	-1.68312423373657	0.146078357832434	0.802001738429253	-4.93262781749521
Q5HY92	FIGN	0.0313573990468528	3.14336426803958	0.200553114761686	0.848028954313441	0.992251849888933	-4.93270871629211
Q9UN86	G3BP2	-0.0553282375059337	3.38641091476159	-1.19396970439404	0.279918821270237	0.876864111598756	-4.93286228617533
Q6NUP7-1	PPP4R4	-0.057995683683095	3.37490103733803	-1.02585870199902	0.346612205554368	0.891894850640453	-4.93289257550694
Q9ULK4	MED23	0.0629621197771426	3.32409385672499	1.76928206389971	0.129984136847935	0.80153112064763	-4.93366448526027
Q9UPT6	MAPK8IP3	0.106142148698766	3.33682216195472	0.926529992993973	0.391807460447436	0.901899270999221	-4.93380151333878
Q9UBS3	DNAJB9	-0.058031424442912	3.22575780874916	-1.02456058884546	0.347174534345433	0.891894850640453	-4.93395513270558
Q02040-1	AKAP17A	0.0322354939849374	3.36658126495009	1.91417732676417	0.106789466343486	0.777632288017464	-4.93537525157696
Q9Y2X7-1	GIT1	0.0403820222335972	3.35542364598609	1.58608211644371	0.166537385094656	0.814843634213137	-4.935618740386
Q8TCG1	KIAA1524; CIP2A	0.0354280713171712	3.29535630884826	1.8566384655823	0.115458385044178	0.779922427471933	-4.93594542574793
Q7Z4K8-1	TRIM46	0.0115572698309761	3.40046131820557	0.108296728595133	0.917480695787324	0.994246356863115	-4.93603775818606
Q9Y6X3-1	MAU2	0.0463152418237733	3.3497428873072	1.42616487583958	0.206347469896853	0.844769364487011	-4.9364277475402
Q52WX2	SBK1	0.0653659644494279	3.4121825351796	1.14486579957803	0.298165055349149	0.879374613162798	-4.93648216089781
Q16594	TAF9	0.0667288808708222	3.35843568857633	1.01453445637742	0.351542799238464	0.891905133692684	-4.93654929999371
Q9P2Y5	UVRAG	-0.0713472454903888	3.10914725458158	-0.794831953479589	0.458597651241836	0.917434466838948	-4.93675207650506
O14874	BCKDK	-0.0908882143069761	3.28459447499705	-1.35890133287387	0.225612311815292	0.860287105490515	-4.93720291890819
Q9NVR7	TBCCD1	0.0576838214222071	3.38930834333943	0.9599769660004	0.376095599614999	0.898549931818952	-4.93721785288331
O75326-1	SEMA7A	0.062509656414754	3.40055554541868	0.467103913589121	0.65778844883681	0.967999537685401	-4.93763312082047
P23025	XPA	0.0754757752787947	3.13451254918117	0.839547686749758	0.43503795877974	0.908951511719062	-4.93778394975771
Q9NYP9	MIS18A	0.0482690612178171	3.37768240749306	1.48415174268423	0.190975301035938	0.842479975778578	-4.93852929558218
Q9H9L3	ISG20L2	0.0669500649437389	3.3602065305721	1.4686273898593	0.194982305155094	0.843632815050238	-4.9402684405637
Q13542	EIF4EBP2	-0.0895591903155918	3.33298180345042	-1.17104146258666	0.288315046627433	0.876864111598756	-4.94050020174128
Q9BVL2	NUPL1; NUP58	0.0408596816508235	3.39602528384074	1.76926286740897	0.129987520504216	0.80153112064763	-4.94060101964029
P35637-1	FUS	0.139621193124516	3.35922444028631	2.06216138226547	0.0873987755894651	0.75221525295928	-4.94151279645842
Q9Y2W2	WBP11	-0.0426411443853801	3.32915940541506	-2.06835733389545	0.0866702145477416	0.75221525295928	-4.94206116310426
O14578-4	CIT	-0.03698416547437	3.35187476521852	-1.6824071711639	0.146220181441066	0.802001738429253	-4.94212249778158
Q562R1	ACTBL2	0.091371944632146	3.41841717866836	0.969496280818135	0.371715829877757	0.898399744082953	-4.94223486182523
Q9NXB0-1	MKS1	0.0333660943829502	3.34501399579497	0.318679851801676	0.761350228576161	0.98301756240289	-4.94243070449319
O43598-1	C6orf108; DNPH1	0.0606940745451188	2.87197885023429	1.05640292798585	0.333594304431558	0.887903892099456	-4.94244520736657
Q9NRF8	CTPS2	-0.0611039548658406	3.38299574034428	-1.97135668800693	0.0988251137086501	0.772540300044155	-4.94371319779338
Q9NUQ3-1	TXLNG	0.0539170017305903	3.38758267749291	1.7822414838694	0.127719641203754	0.798690677216784	-4.94391878699544
Q99541	PLIN2	-0.0593971971187117	3.24748486400014	-1.549628233553	0.174914067947789	0.827739366178037	-4.94414186004036
Q6ZSJ8	C1orf122	-0.0665637558605905	3.36420436843942	-1.25810576546435	0.257555527064073	0.867228629358249	-4.94526079808406
P62072	TIMM10	-0.0932487102982237	3.21899882904053	-1.29595182025889	0.245114087117762	0.863518733536854	-4.94652635130113
Q7Z4S6-4	KIF21A	-0.0329961631639354	3.18520701908387	-1.88391019264549	0.111264712766716	0.777632288017464	-4.9477824935416
Q6IS24	WBSCR17; GALNT17	0.0704862832999639	3.42577152744188	0.994397199175737	0.360450838402266	0.894655073510897	-4.94794739860634
Q16667	CDKN3	0.0686378457650913	3.33074991288685	0.623898175060874	0.556880938191727	0.950200038364284	-4.94809630983753
O15360	FANCA	0.0483401603599214	3.32136719783525	1.5032420642114	0.18615398814553	0.838627113523051	-4.94895208246923
Q8IWZ6-1	BBS7	-0.0630072041474127	3.19625784497665	-1.20169957132253	0.277136411422351	0.876864111598756	-4.94902432142572
O95613	PCNT	0.0601124938927594	3.15446463864836	1.87095458002647	0.113237534359473	0.777632288017464	-4.94995191497692
Q9Y6Q3-2	ZFP37	0.0671184813377118	3.36133001163298	1.04621169598685	0.337892373927926	0.888627697645208	-4.95088605755865
Q9GZX3	CHST6	0.0650218681293051	3.38738270144446	0.953054283333882	0.379306225055896	0.898549931818952	-4.95167464443019
P43007-1	SLC1A4	0.395178081342179	1.05028647933249	1.2698461807965	0.253637120076076	0.866252015734413	-4.95168509864438
Q9UHP3-3	USP25	0.112754409228165	3.41235195609231	1.7274301042419	0.137571594110285	0.802001738429253	-4.95187354066448
Q5VW38	GPR107	0.0734843115850384	3.31428754866648	1.15324043327509	0.294982716228411	0.877853917340717	-4.95251368246855
P62341	SELT; SELENOT	-0.0628519207502462	3.28299167558856	-0.83341625545207	0.438214853108309	0.909970745284655	-4.95285091174272
O43502	RAD51C	-0.058870525244999	3.17072851492933	-0.986027595465768	0.364206300415205	0.896547236031715	-4.95285775564114
Q9UPQ3-1	AGAP1	0.0560199982023977	3.32823094367175	1.11678850701361	0.309048826746987	0.882509719656767	-4.95307374891017
P32189-3	GK	0.0961878082204979	3.17593563383202	1.30894909541026	0.240967132010127	0.863518733536854	-4.953317037249
Q9NUL3	STAU2	-0.0591482001758915	3.37769021279818	-1.27059027831294	0.253390570583794	0.866252015734413	-4.95345038329112
Q9P1W9	PIM2	-0.0680238484990866	3.39473434080069	-0.686552589885576	0.51936843224481	0.940206373804197	-4.95403217803814
Q96AE7	TTC17	0.0377809609054377	3.32855775826088	0.337200522685319	0.748064564743903	0.982331429215548	-4.95404094572592
Q6PII3	CCDC174	0.0560232709097285	3.2665335737897	1.13756434206349	0.300963486276251	0.880769241182566	-4.95436212455389
Q9H6S1-1	AZI2	0.0597099529355063	3.19518002683911	0.724756459318227	0.497331509838603	0.928804124508706	-4.95442354733536
Q92664	GTF3A	0.0897686358566404	3.36983687546512	1.05501524704188	0.334176882633469	0.887903892099456	-4.95488136881599
Q01433-1	AMPD2	-0.0561698806472224	3.2872413058611	-1.50859743478593	0.184822226725511	0.837289520506358	-4.95505414166804
O75486-1	SUPT3H	0.0348188726804027	3.25881813291562	0.318233600376708	0.761671483058356	0.98301756240289	-4.95522419593503
Q9BY12	SCAPER	0.0644326459768818	3.13713386080512	0.781193479200581	0.465963442997525	0.920036421177091	-4.95551890350548
Q8N1B3-1	FAM58A; CCNQ	0.0487097671206378	3.28897599511418	0.469683606339023	0.656052494950645	0.967911332132333	-4.9559346942368
Q9NX57	RAB20	0.063635543623048	3.3453704021316	0.913715252503041	0.397961001060877	0.904801083288645	-4.9562506096735
Q53H80	AKIRIN2	0.0556677308511973	3.35163230672777	0.737958979125892	0.489865953559537	0.927946740003831	-4.95626631610404
P18754-2	RCC1	0.0404774303760776	3.25553687006338	2.129207725236	0.0798386421109881	0.745160659702556	-4.95638271397552
P22676	CALB2	-0.0592750718576621	3.41407869988067	-0.771375163577336	0.471317961161788	0.923614661055744	-4.95673736886878
Q92619-2	HMHA1; ARHGAP45	0.125844852005111	1.77234542117454	1.30524915252653	0.242141179831721	0.863518733536854	-4.95678016321421
Q63HQ0	AP1AR	-0.0578680278632102	3.26261157513207	-0.879759925393774	0.414625717422253	0.907440161583258	-4.95690336938653
Q969Q6-1	PPP2R3C	-0.04900372716858	3.22380774868844	-0.348930864042438	0.739698916110681	0.98104761640255	-4.95692170952776
Q9UKL0	RCOR1	0.0746677249211719	3.27111439023842	1.4853390633775	0.190672045024885	0.842458239693728	-4.95716022789408
Q9NWS9	ZNF446	0.0146333870394237	3.21253450082624	0.127112033792406	0.903227655050539	0.993681457020471	-4.95762130628577
Q7L1T6	CYB5R4	-0.055304989184982	3.15959461452668	-1.16291837087361	0.291341429621279	0.877028075353945	-4.95780215195832
Q96S97	MYADM	0.0438663598512949	3.40993116506126	0.423518552249469	0.687469402694283	0.971315785365755	-4.95842074503127
Q9H1Y0-1	ATG5	-0.0534166698523482	3.31455677560024	-1.5399216861215	0.177211414757245	0.830066782329383	-4.958579611161
Q13491-4	GPM6B	0.0826154824644262	3.48014976578494	0.895992740892821	0.406593704102802	0.907440161583258	-4.95909870429323
Q9UI26-2	IPO11	-0.0467488161596483	3.32583489579932	-1.88493017434247	0.111110869067248	0.777632288017464	-4.9597443880621
P57729	RAB38	-0.0680715151093879	3.45176305111366	-1.06279092482734	0.330923298057034	0.887707532410339	-4.96029361030161
Q9NQ50	MRPL40	-0.0845924683112427	3.23906428563659	-1.47420797062605	0.193532903288694	0.843632815050238	-4.96051607419802
O00559-2	EBAG9	0.0574875432060899	3.31297621093218	0.919059339692505	0.395385783808992	0.901899270999221	-4.96132049441811
P51178-2	PLCD1	0.0507202094124057	3.34258783805406	1.31567833276437	0.238844973601784	0.863518733536854	-4.96158497783052
P34897-1	SHMT2	-0.0959603966550037	3.27749434461934	-2.1075865312393	0.0822000807525054	0.745488057719842	-4.96173496810028
Q9UNK9	ANGEL1	0.0847938751845536	3.22756583173925	1.05606461668775	0.33373625742147	0.887903892099456	-4.9622615494828
Q8IZ21-2	PHACTR4	-0.0519312521923571	3.33026296819514	-1.58662018812124	0.166416666666199	0.814843634213137	-4.96229206081865
O15381-1	NVL	0.0823797898168465	3.34605730292794	2.00453803807031	0.0944826405726666	0.764153550100263	-4.96262548390936
Q2M296-3	MTHFSD	-0.0669799633407309	3.27772126009872	-0.624307595467842	0.556630380360626	0.950200038364284	-4.96266448040039
P55884-2	EIF3B	-0.0465614201050001	3.34475435951646	-2.19534883387746	0.0730412641704075	0.734642875539009	-4.96314224473801
O15120	AGPAT2	-0.0946110570905494	3.36854265200587	-0.781518543605499	0.46578690815803	0.920036421177091	-4.96322745957823
Q9NRA0-1	SPHK2	0.0592677917392991	3.30943582147149	0.947151453915948	0.382060879345779	0.899071998631553	-4.96358916368683
Q16512-2	PKN1	0.037464492166647	3.27626266459331	1.61869947073508	0.159369613407115	0.809242066405688	-4.96374059700686
Q96BN2	TADA1	-0.0608882136739168	3.30637788439926	-1.45444213831117	0.198712401709818	0.844295969579547	-4.96420271142026
Q12851	MAP4K2	0.0462154160006641	3.32841105747118	1.37561777167987	0.220676151515522	0.858240323582177	-4.96426043966532
Q9H2V7	SPNS1	0.0605135883851854	3.21843330285969	0.579194780119776	0.584657694452124	0.955227326298109	-4.96661285195179
P49914	MTHFS	-0.0586246897812775	3.34243551519884	-1.26224692031224	0.256167305732726	0.866252015734413	-4.96704644910947
Q0IIM8	TBC1D8B	0.0127033772317219	3.1979630014773	0.117729792225921	0.910330297295415	0.993681457020471	-4.96716301198239
Q6ZT12-4	UBR3	-0.0884593926545786	3.36341394945786	-1.56051612299217	0.172370890705993	0.822741247620261	-4.96758739298801
Q8TBN0	RAB3IL1	0.0543383665951348	3.34571743828056	0.952795511551647	0.379426656738671	0.898549931818952	-4.96866692220965
Q00169	PITPNA	-0.054736599914084	3.31532299046224	-1.74528885644619	0.13428194373688	0.80153112064763	-4.96870287386951
O94813	SLIT2	0.064867916898157	3.21953547604335	0.942796325052534	0.384103328279304	0.900443057922181	-4.96931028743215
P11474-1	ESRRA	0.058630151886264	3.25098473505251	1.16048795181508	0.292252215885817	0.87755245028837	-4.96949189684104
Q9BVL4	SELO; SELENOO	-0.0663284888572006	3.31912867158471	-1.01225037566031	0.352544158933143	0.89264646446702	-4.96958316769225
Q16773	CCBL1; KYAT1	-0.0597032638308144	3.15365604508545	-1.2273224890002	0.26808520297943	0.874681539292867	-4.96974849581973
P14373	TRIM27	0.0525718550526837	3.25543790601755	1.55390180890555	0.173911615640646	0.82567732811315	-4.97059303626217
Q5IJ48	CRB2	-0.048424202857637	3.18337544153316	-0.46869299222064	0.65671882846236	0.967982104123578	-4.97059446302754
Q9Y5H3-1	PCDHGA10	-0.0724653845367374	3.41871052918704	-0.763060248730826	0.475886483648122	0.924745258809059	-4.97074013339578
Q9Y3D8	AK6; TAF9	-0.0718220025365864	3.28337968141066	-1.21807504111392	0.271321528397072	0.874681539292867	-4.97269675751395
Q96GE4	CEP95	-0.0632703387885175	3.32914130795286	-0.852372469685009	0.428448195464932	0.908951511719062	-4.97316984791253
Q9H2G4	TSPYL2	0.0551372598136122	3.2608519209702	0.789993589251279	0.461201122251929	0.918453436070503	-4.97375761950684
O00409	FOXN3	0.0616342549562909	3.38883403166505	1.12617049192693	0.305375098291653	0.881760539741648	-4.97445760510614
P61201-2	COPS2	-0.0930609311263084	3.26742902850995	-1.86301501410306	0.114463850955614	0.778516546570453	-4.97510512042743
Q96BQ5	CCDC127	0.0833481517546298	3.32280064852164	1.05543153627901	0.33400202738313	0.887903892099456	-4.97513506527503
O15439-1	ABCC4	0.0950202303400069	3.19516603729688	1.31119638497004	0.240256536487474	0.863518733536854	-4.97547213797478
O95872	GPANK1	-0.0537440887858211	3.34602584623777	-0.874875138238931	0.41706612058677	0.907440161583258	-4.97557523582353
Q9P2W1	PSMC3IP	0.0493644650023929	3.27487832455054	1.51364847900354	0.183574396770467	0.834919787453331	-4.97574083313253
O43490-1	PROM1	0.0420250922535158	3.44871381948795	1.60810975111811	0.161663539948054	0.809242066405688	-4.97595978912495
Q9UHD9	UBQLN2	-0.0492585495209819	3.3200967953582	-1.6928205071572	0.14417372809057	0.802001738429253	-4.9759896943523
O60499	STX10	0.0550840892289851	3.23359020364477	1.22517982028374	0.268832041000741	0.874681539292867	-4.97648962401903
P28482	MAPK1	-0.0382758813691765	3.25870763756051	-1.64863393723383	0.153054096147222	0.809242066405688	-4.97653445818561
Q7Z6L1-2	TECPR1	-0.0110001158165227	3.14554477012473	-0.0866938779193744	0.933887089102509	0.995186225335631	-4.97663396631222
Q9Y426	C2CD2	0.0364917948595296	3.33399615052753	0.359379187331404	0.732280636927966	0.979474765107159	-4.97770865461206
P09669	COX6C	-0.137511942632689	3.36581594495835	-1.51555691393584	0.183105006229047	0.834605029660284	-4.97812334489666
Q8WUA2	PPIL4	-0.0300975406430586	3.32205511086952	-1.85311479118044	0.116011672774744	0.779922427471933	-4.97817447826746
O15040	TECPR2	-0.0576056312455273	3.36026911603804	-1.288432385267	0.247542398174944	0.863922934345683	-4.97956336200154
O75817	POP7	-0.0542014672473305	3.29399669486608	-1.10784908487755	0.312583966214295	0.883348976962421	-4.97963153004073
Q3B7J2-1	GFOD2	-0.0527350293525376	3.31945980246116	-0.843083616657597	0.433213635223404	0.908951511719062	-4.98024541660515
Q14587-6	ZNF268	-0.081943124092468	3.35975702224403	-0.598417514086218	0.572612413943965	0.952739631268293	-4.98031836624035
Q9HBH0	RHOF	-0.0239470792099875	3.36038113499146	-0.220093316968053	0.83348753400942	0.990286336770501	-4.98073693237633
O14975	SLC27A2	0.0718152326482563	3.32027695569317	1.11852821591586	0.308364792070685	0.882509719656767	-4.98102520681853
Q08752	PPID	-0.0402150030144133	3.26919768565928	-1.76958248123278	0.129931195345118	0.80153112064763	-4.98174834142934
Q9NT99	LRRC4B	0.0721072605537093	3.28037008432914	0.632788630044975	0.551456020240341	0.948224648474345	-4.98244490467783
Q14642	INPP5A	-0.00967180016867431	3.39172277730176	-0.0853992235141501	0.934871556655381	0.995186225335631	-4.98265268206634
Q13617-2	CUL2	0.0359672835069398	3.28210418490536	1.84422309078139	0.11741967668176	0.783342399567362	-4.98320726869285
P55084	HADHB	-0.12108685000124	3.26345857065494	-1.86672305451509	0.113889471141382	0.777632288017464	-4.98327536830212
Q9ULI4	KIF26A	0.00228495984871728	3.39529895962448	0.0226549438625278	0.982699596411956	0.998093753621307	-4.98347780244859
Q9BTE3-1	MCMBP	-0.0366709999922227	3.35007101477372	-1.88104645789526	0.111697795097586	0.777632288017464	-4.9836720044742
Q08257	CRYZ	-0.0750911332487186	3.09402053760422	-1.40611191432459	0.211925960312349	0.849051811963851	-4.98371625831126
P04350	TUBB4A	-0.0520609946598792	3.31691517435825	-0.993453836435854	0.360872567203402	0.89480009864085	-4.98381411480121
A6NFI3	ZNF316	0.060710216508479	3.33054652257063	0.921758237723638	0.39409014390625	0.901899270999221	-4.98429764560013
P31751	AKT2	-0.0515743793919295	3.28992455161369	-1.40895777021396	0.211125875375152	0.848929620481218	-4.98430146794972
Q8NDV1-1	ST6GALNAC3	0.0688706819025898	3.35528385662013	0.924439841456994	0.392806067939773	0.901899270999221	-4.98433627499176
[truncated: 5,673 more rows]
