# Supplementary material for: Thalidomide promotes degradation of SALL4, a transcription factor implicated in Duane Radial Ray syndrome
Source: eLife journal article supplement (doi:10.7554/elife.38430), 2018-08-01
Supplement: supp [file elife-38430-supp-v1.zip › elife_poa_e38430_Figure_1_source_data_2.csv]

	ID	logFC	AveExpr	t	P.Value	adj.P.Val	B
Q9UJQ4	SALL4	-0.619393149274549	3.87897612700527	-18.6155080625456	2.53542061550498e-06	0.00972587348107711	4.96727744400543
P31943	HNRNPH1	0.155594655338578	3.34947518739861	11.3662512171831	3.94630827846154e-05	0.0617946763591401	3.02607799509833
Q15181	PPA1	-0.191574044072681	3.09220543982989	-10.753133395874	5.34699142357675e-05	0.0617946763591401	2.70466595467154
P43243	MATR3	0.143272899839389	3.39911987060769	10.3728657245781	6.50800318436905e-05	0.0617946763591401	2.53774690599055
Q92616	GCN1L1; GCN1	-0.100367831449279	3.31833571574142	-10.4198443680163	6.34967440861605e-05	0.0617946763591401	2.46263367537247
Q5H9R7-5	PPP6R3	-0.107385338908034	3.32375221190943	-9.72874513287356	9.21991808019897e-05	0.0617946763591401	2.19332431329491
Q9H2P0	ADNP	0.126078659289578	3.36827827260197	9.49823908824408	0.000104971477694587	0.0617946763591401	2.04721163445987
Q02790	FKBP4	-0.110598826532045	3.31740422515098	-9.60883417269092	9.86020814597294e-05	0.0617946763591401	2.00351050662908
Q08211	DHX9	0.129926776523108	3.38289046009127	9.77616667214152	8.98017402259502e-05	0.0617946763591401	1.96963526855753
Q9UK61	FAM208A	0.128850482632189	3.33044305039644	9.23183427683933	0.000122388004692	0.0617946763591401	1.90812170937869
O43166-2	SIPA1L1	0.158548111711695	3.45646967701058	9.05287227238921	0.000135986053050981	0.0617946763591401	1.81457926832431
O15381-1	NVL	0.146071828769057	3.37153411850882	8.8199963526555	0.000156405026526765	0.0617946763591401	1.67560502596286
P26599-3	PTBP1	0.138041303528096	3.33807451388025	8.99884100389472	0.000140432160885975	0.0617946763591401	1.6738081197169
Q96PK6-1	RBM14; RBM14-RBM4	0.112839231848646	3.36992958190491	8.70895268030699	0.000167386990465167	0.0617946763591401	1.60773197901133
P08133-1	ANXA6	-0.122285111898654	3.07616857707654	-8.7191100706054	0.000166345949387657	0.0617946763591401	1.60151009015623
P52272	HNRNPM	0.132776083869539	3.38222606078026	9.28766515938073	0.000118474831449926	0.0617946763591401	1.55196629939825
Q96T58	SPEN	0.117032085921019	3.31962305832557	8.68368897468759	0.000170009357905906	0.0617946763591401	1.53545938200176
Q9Y490	TLN1	-0.10016017934857	3.2654950271403	-8.8209356205417	0.00015631577991435	0.0617946763591401	1.49113765224744
Q9BYW2	SETD2	0.13442045851052	3.39302884060161	8.51673892658064	0.000188592499116579	0.0617946763591401	1.46311965120113
P23246-1	SFPQ	0.169126150636018	3.37146939101491	8.79784241173578	0.000158527337335335	0.0617946763591401	1.45855613911448
Q8NDT2	RBM15B	0.163104532412979	3.37605985030545	8.55032905283896	0.000184670839798845	0.0617946763591401	1.43060094168229
P55263-1	ADK	-0.152722561717219	3.08478966634961	-8.27719276539192	0.000219549434173425	0.0617946763591401	1.28319893622484
P52948-1	NUP98	0.1214264659943	3.39231889145191	8.23861624828765	0.000225069714671032	0.0617946763591401	1.25037752759413
Q96GQ7	DDX27	0.12295200424168	3.4032424843875	8.08073382362717	0.000249411264571243	0.0617946763591401	1.20878278223887
P54577	YARS	-0.13019678695201	3.24498646407543	-8.13157051778421	0.000241253761200907	0.0617946763591401	1.10137255659849
Q8NEG4-1	FAM83F	-1.41105584992274	3.36255267707842	-32.6768665511847	1.05490759791985e-07	0.000809325109124106	1.08408681394618
O95235	KIF20A	0.120160679081715	3.37146886109974	7.84478637007884	0.000291732582615235	0.0617946763591401	1.06497220327451
O14497	ARID1A	0.10741818068021	3.4004369040244	7.96036076184023	0.000270039045948705	0.0617946763591401	0.984536270928268
Q3B726	TWISTNB	0.171712778302781	3.36936103853344	7.83206190532418	0.000294242504554535	0.0617946763591401	0.937854253491594
Q9H9Y6-3	POLR1B	0.107065742897069	3.38584404766549	7.6368016361334	0.00033608721532143	0.0617946763591401	0.927938492485114
Q9BX68	HINT2	0.211680344831845	3.17142778368062	8.28969937342961	0.000217793660699338	0.0617946763591401	0.921929687926919
P62701	RPS4X	-0.100931630066022	3.34054699372589	-7.73730681470221	0.000313742789068995	0.0617946763591401	0.895959732200983
P49750-4	YLPM1	0.148537057446983	3.36914484604794	7.54138241547248	0.00035902757320042	0.0617946763591401	0.864913330722302
Q5UIP0	RIF1	0.125059192201275	3.43111548112783	7.95843399316859	0.000270385000653882	0.0617946763591401	0.857235693587898
P49756-1	RBM25	0.0976604356010087	3.38626191804826	7.55353554956465	0.00035600699371759	0.0617946763591401	0.846376367604875
Q96T37-1	RBM15	0.110104612996705	3.36869591628516	7.48197806499267	0.000374227020085387	0.0617946763591401	0.826889324472624
Q14978-2	NOLC1	0.116938000955203	3.37728052775081	7.76538591152756	0.000307811811831786	0.0617946763591401	0.823807971400456
P09622	DLD	0.153699878248508	3.35382011837786	7.44575434511846	0.000383861693911454	0.0617946763591401	0.776990162433716
Q9P2I0	CPSF2	0.115102719363448	3.38031789337926	7.45796812218793	0.00038058129890367	0.0617946763591401	0.770330572458046
Q9P275-2	USP36	0.106325767909484	3.39221826700368	7.37778150996131	0.000402728599837983	0.0617946763591401	0.750524159053199
Q13151	HNRNPA0	0.17232814054875	3.35441110306421	7.37887650751737	0.000402416258833909	0.0617946763591401	0.740432648071069
Q7Z6Z7-2	HUWE1	-0.0745964737143821	3.30563291626956	-7.74956287516399	0.000311137839941601	0.0617946763591401	0.725686925209056
Q01518-1	CAP1	-0.142670211373595	3.30194140484388	-7.39195123825748	0.000398708401586766	0.0617946763591401	0.715697634851065
Q9H307	PNN	0.112866598078866	3.37459128515866	7.45093844030212	0.000382465350483705	0.0617946763591401	0.685281101013911
Q9HCK1	ZDBF2	0.216048744618717	3.26135431605133	7.64118190742116	0.000335075672154833	0.0617946763591401	0.679705531945193
P62995	TRA2B	0.143150567397581	3.3581022415695	7.27198001804962	0.000434278575302961	0.0642412971343548	0.659887386757004
Q07955-1	SRSF1	0.122809470241339	3.33588473049564	7.23813194288135	0.000444970810261633	0.0642412971343548	0.631464117970132
Q9HCD5	NCOA5	0.141827140511962	3.37185770990633	7.1901692422578	0.000460648774890933	0.0642412971343548	0.606800790418079
P11586	MTHFD1	-0.0672883767661498	3.29050404190151	-7.54761186548999	0.000357475585450829	0.0617946763591401	0.60397319572637
O95602	POLR1A	0.104525176625699	3.38074728571827	7.41460476238687	0.000392377503006768	0.0617946763591401	0.596096752295006
O94979	SEC31A	-0.0899033553302762	3.26049985003121	-7.17643400332982	0.000465255840758286	0.0642412971343548	0.566334908950918
Q9ULI0	ATAD2B	0.160141723552811	3.39630471557005	7.07757136935832	0.000500038256614615	0.0642412971343548	0.534020300602569
Q9BUQ8	DDX23	0.105632930443805	3.32264909163317	7.18872376944568	0.000461131116725782	0.0642412971343548	0.52571311248142
Q96L73-1	NSD1	0.121467555176184	3.42194238961616	7.16170452278207	0.000470255855123018	0.0642412971343548	0.502252247312236
P63151-2	PPP2R2A	-0.150415085406014	3.31826491880757	-7.13656965474989	0.000478932586740054	0.0642412971343548	0.501922984680225
Q9UMN6	KMT2B; MLL4	0.113780722426154	3.39211584585717	6.95269673021281	0.000548367721265323	0.0642412971343548	0.458679972785354
Q15233	NONO	0.124956142388781	3.3536019908045	7.39358492228406	0.000398247896946031	0.0617946763591401	0.436431635188463
P12270	TPR	0.145735202860317	3.3642408960209	7.54154955624893	0.000358985830246584	0.0617946763591401	0.430111014385581
Q02040-1	AKAP17A	0.115729762281123	3.39997897226856	6.89067800432099	0.000574369489614136	0.0642412971343548	0.413095412928544
Q5VWN6-1	FAM208B	0.109926804515286	3.37066590544718	6.86192684923501	0.000586906153968041	0.0642412971343548	0.374106599782449
Q5T3I0-3	GPATCH4	0.135594020159782	3.40473283742322	6.82832969414257	0.000601959260542452	0.0642412971343548	0.366475789657025
P08237-3	PFKM	-0.137018431520822	3.281222443291	-6.84758893734044	0.000593276281091781	0.0642412971343548	0.331706672365491
Q14151	SAFB2	0.157717136279224	3.39117615151457	6.78065162496777	0.00062409507903611	0.0642412971343548	0.318328917274822
Q9H6R4-1	NOL6	0.153284552009713	3.41944193057087	6.74344821074409	0.000642023538854737	0.0642412971343548	0.303968336373046
P38398-7	BRCA1	0.112207700892647	3.31935094664331	6.72102408520015	0.000653117515481036	0.0642412971343548	0.290212394454271
Q9Y6J0	CABIN1	0.101507205059942	3.36692063289895	6.70683548744459	0.000660251651894177	0.0642412971343548	0.268139262300954
Q96Q89-3	KIF20B	0.116526154074342	3.40536310265748	6.89111505537898	0.000574181324096538	0.0642412971343548	0.257868999825868
Q8N163-1	KIAA1967; CCAR2	0.151997941659653	3.36734362001073	6.8516398423035	0.000591468445985844	0.0642412971343548	0.255234554681184
Q12789-2	GTF3C1	0.0787695131970108	3.36190450666273	6.88812080311636	0.000575471884714494	0.0642412971343548	0.229936973830506
P78406	RAE1	0.132617370580324	3.33595299848462	6.65959086259369	0.000684664859546745	0.0642412971343548	0.221163927076067
Q2NKX8	ERCC6L	-0.117575291173917	3.37552472496074	-6.68972601481432	0.000668974647630986	0.0642412971343548	0.215238150703487
P58107	EPPK1	-0.0981564844037368	3.38484916203647	-6.81019489129676	0.000610270010864925	0.0642412971343548	0.215016691276655
P22102-1	GART	-0.105208587370276	3.28791175623008	-6.89840606203276	0.000571052797213305	0.0642412971343548	0.203671222235805
Q8IXT5	RBM12B	0.166769277960105	3.34892525849834	6.59180034291594	0.000721542275467164	0.0642412971343548	0.188387649074074
Q03164-3	KMT2A; MLL	0.133991066639585	3.39337868500532	6.60462096605075	0.000714395217441541	0.0642412971343548	0.154421769188805
Q14966-1	ZNF638	0.125702806028265	3.38344175994542	6.79073283049655	0.000619337130758722	0.0642412971343548	0.154010470122871
Q13616	CUL1	-0.107290325397933	3.30272558418824	-6.5930926009212	0.000720818151502146	0.0642412971343548	0.150366476953317
Q9C0J8	WDR33	0.115924658294846	3.37681119768817	6.58206080284823	0.000727027020589918	0.0642412971343548	0.14352851914735
Q15061	WDR43	0.0969795445174028	3.40995796910175	6.57334722719492	0.000731974889463037	0.0642412971343548	0.133645695524064
Q8WUM4	PDCD6IP	-0.124645200252996	3.16838163979555	-6.61619497790033	0.000708013328264875	0.0642412971343548	0.132596061703603
P49588	AARS	-0.101328307808277	3.26618964905728	-6.8245764111826	0.000603668496183972	0.0642412971343548	0.117408826174243
Q9HAV4	XPO5	-0.11185057692363	3.33075104580255	-6.59634503793527	0.000718999345953732	0.0642412971343548	0.107546031725929
Q8WUM0	NUP133	0.0958379110101448	3.37808112285417	6.66997100490823	0.000679212743058037	0.0642412971343548	0.102364780027377
P51157-1	RAB28	-0.713641745774991	3.21781461924742	-11.6077992003311	3.51576938350931e-05	0.0617946763591401	0.0918953210770797
Q8TDD1-2	DDX54	0.105621808681781	3.40097947953404	6.45745245140654	0.000801629380377628	0.0642412971343548	0.0836029162222598
Q8TDN6	BRIX1	0.10691512119367	3.37234945607383	6.42819289162981	0.000820406841987162	0.0642412971343548	0.0706627648916607
Q8TED0	UTP15	0.104721791538363	3.39046975171128	6.41770595120311	0.000827260228625319	0.0642412971343548	0.0579818520765025
Q9NWV4	C1orf123	-0.170214253258652	3.2958469540291	-6.59671414744723	0.000718793270525356	0.0642412971343548	0.0478472827545433
Q86X55	CARM1	-0.106730614221991	3.34684956665986	-6.3760976751782	0.000855111609277993	0.0642412971343548	0.0270318515111923
O60318	MCM3AP	0.126864534775657	3.36852484932613	6.3883571776683	0.000846794433541863	0.0642412971343548	0.0123029016358389
Q9UBF2	COPG2	-0.110051464431129	3.36353210912306	-6.3840932732695	0.000849676538784243	0.0642412971343548	-0.019418257966402
Q9UKK9	NUDT5	-0.175467460472299	3.29378150918872	-6.28243750446101	0.000921862122728445	0.0642412971343548	-0.044398166383921
Q9H2F5-2	EPC1	0.176580070654401	3.41531154798235	6.57083261169018	0.000733410005746726	0.0642412971343548	-0.0498665134285723
Q8TAT6-2	NPLOC4	-0.158347519694519	3.25770865814918	-6.25965479216285	0.000938996621168969	0.0642412971343548	-0.0585062902478795
P14866	HNRNPL	0.117614606528801	3.38187378248898	6.92124862513838	0.000561378216669621	0.0642412971343548	-0.0615699481117993
Q92797-1	SYMPK	0.0922746625426768	3.35961889894165	6.43197087425379	0.0008179539563338	0.0642412971343548	-0.102359972417301
Q06210-1	GFPT1	-0.116119570325741	3.28382608567963	-6.3572322442661	0.00086809543277623	0.0642412971343548	-0.107407520582009
Q5BKZ1	ZNF326	0.143749381636788	3.38009437621084	6.19358179916009	0.000990806165612708	0.0642412971343548	-0.114403185880217
Q15007	WTAP	0.104686679278268	3.36694497945767	6.18366144197421	0.000998866451354328	0.0642412971343548	-0.140344168422752
P53618	COPB1	-0.0798405781463842	3.31020952784513	-6.37324591176057	0.000857059824624218	0.0642412971343548	-0.150804742356117
Q13242	SRSF9	0.167309233864096	3.36910667458797	6.14992935733369	0.00102684523065916	0.0642412971343548	-0.157697305332145
Q8NFD5-3	ARID1B	0.112829950941701	3.39307904354437	6.26244644392567	0.000936877426251159	0.0642412971343548	-0.161456002795669
O96028-1	WHSC1; NSD2	0.0924988980662622	3.35240651467724	6.22254024806526	0.0009677032967691	0.0642412971343548	-0.162289994770031
P53355-3	DAPK1	0.132823469832787	3.42643605733068	6.13819184189938	0.00103679205188029	0.0642412971343548	-0.165305115621294
P37837	TALDO1	-0.119118187548141	3.24032576017807	-6.21256972185817	0.000975586839469273	0.0642412971343548	-0.170844455625811
Q08379	GOLGA2	0.0948727929518084	3.35217429100111	6.1922040924317	0.0009919210521554	0.0642412971343548	-0.175980964730498
Q96D46	NMD3	-0.110806521262059	3.29824985116537	-6.10599216249217	0.0010646549591302	0.0642434834743067	-0.179542128252916
Q96GN5-1	CDCA7L	0.170187158210963	3.45070095586922	6.16020095085457	0.00101823091286521	0.0642412971343548	-0.182615304858147
Q9H9B1	EHMT1	0.102868899039421	3.43438655420516	6.21960983098769	0.000970012679593147	0.0642412971343548	-0.193601192703238
O95340-2	PAPSS2	-0.144543159698212	3.32945266329376	-6.07772711071788	0.00108982674874034	0.0642434834743067	-0.201173989929867
Q8IY67-2	RAVER1	0.100434727681975	3.31220891657733	6.09141951469189	0.00107754809891057	0.0642434834743067	-0.210713941814585
P22234	PAICS	-0.104840689315701	3.33771065041171	-6.34977366275931	0.000873291374569208	0.0642412971343548	-0.223755980272637
Q96PZ0	PUS7	-0.107117015479615	3.33864658355196	-6.15921164231582	0.00101905696321424	0.0642412971343548	-0.226445788426729
Q9BVI0	PHF20	0.153853474842313	3.40095433251693	6.09038753866461	0.001078467944645	0.0642434834743067	-0.252851084831998
Q99729-3	HNRNPAB	0.102464658032093	3.34748957255094	6.32888416766752	0.00088803604288737	0.0642412971343548	-0.257881719979429
P30085-1	CMPK1	-0.216217154405896	3.05496393899284	-6.03035149211755	0.00113357291680278	0.065297469474402	-0.261193595595564
P18583-5	SON	0.138717950429567	3.39595105467929	6.02305074956947	0.001140492819287	0.065297469474402	-0.266269450847358
Q12923-3	PTPN13	0.102563762664142	3.42932585903886	6.20298821090445	0.000983232698981044	0.0642412971343548	-0.289833335182747
Q5VT52	RPRD2	0.127402900351949	3.33624519048291	6.08038781155852	0.00108742819207744	0.0642434834743067	-0.296238464177795
P46939	UTRN	0.100303640168552	3.36581598144319	6.28246812327009	0.000921839338936552	0.0642412971343548	-0.310353935909613
P55786	NPEPPS	-0.100087581119825	3.30774689035302	-6.18341432337722	0.000999068198688226	0.0642412971343548	-0.311484300455979
Q9UGU0	TCF20	0.10611645485621	3.40637709514268	6.06985121703869	0.00109696250457953	0.0642434834743067	-0.314675399294916
Q9HCE3	ZNF532	0.121894745633395	3.47359598758165	6.13641105256781	0.00103831085045099	0.0642412971343548	-0.331336553094932
O95490-6	LPHN2; ADGRL2	0.125446706125609	3.40571736566348	5.87524379816121	0.00129162574124957	0.0689937203860481	-0.362941455611574
Q04837	SSBP1	0.191585040299186	3.3084024291066	5.86244535196161	0.00130576402990153	0.0689937203860481	-0.373920268979081
Q9BTC0	DIDO1	0.104147820033523	3.37241847674986	6.15813341486005	0.00101995813936536	0.0642412971343548	-0.373989228736931
Q14008	CKAP5	-0.0739699957444358	3.2920645153206	-6.35130085737759	0.00087222455311663	0.0642412971343548	-0.378761327860394
P26639-1	TARS	-0.0845395704209723	3.37528730072805	-6.17439067685244	0.00100646739454856	0.0642412971343548	-0.387685827823308
O00154	ACOT7	-0.123594640027048	3.32663275527306	-5.85598614665554	0.00131296704592844	0.0689937203860481	-0.390424756751822
O00622	CYR61	0.249152335110082	3.29696786688925	5.919554604373	0.00124401999363616	0.0681722956512615	-0.416236746403595
Q99728	BARD1	0.126795560492601	3.34865370419837	5.8053225631235	0.00137107896231478	0.0694685637335367	-0.419710462284203
Q6GMV3	PTRHD1	-0.229193325246871	3.37293256249862	-6.40298349661437	0.000836993498193157	0.0642412971343548	-0.420031453980406
Q9Y4A5	TRRAP	0.123462496457396	3.3661074974719	6.28683003884849	0.000918600221739551	0.0642412971343548	-0.425898058747354
Q96LT9	RNPC3	0.166131599071789	3.34346316884575	5.86581756028262	0.00130202157700643	0.0689937203860481	-0.428060884956521
Q9UHD1	CHORDC1	-0.129492577925079	3.27088821704026	-5.93674010384997	0.00122610278101173	0.0681642067820433	-0.438726213295748
Q03252	LMNB2	0.184469979657738	3.34697330171592	6.02993562175102	0.00113396579123609	0.065297469474402	-0.446945321650589
P50748	KNTC1	-0.0853684072803946	3.32892415262613	-5.92293576706102	0.00124047116641261	0.0681722956512615	-0.447004877396354
Q6ZRS2	SRCAP	0.168022641561187	3.29490833014485	5.75275416957553	0.00143452815732525	0.0694685637335367	-0.463427262176022
O60841	EIF5B	-0.085160874008156	3.30516116895986	-6.23101280074948	0.000961061913468	0.0642412971343548	-0.477168243370185
P54198	HIRA	0.111319350710808	3.37380969817901	5.7834260009516	0.00139710707691041	0.0694685637335367	-0.479566612364706
O75152	ZC3H11A	0.117458010010204	3.3274203245964	5.80702422506703	0.00136907970111233	0.0694685637335367	-0.483224854593682
Q16204	CCDC6	-0.111449735086366	3.3824403217569	-5.76498148519597	0.00141947368433941	0.0694685637335367	-0.499160110469663
P46821	MAP1B	-0.079506161625208	3.30609086608018	-6.30690864362862	0.000903858457417371	0.0642412971343548	-0.501930554325478
P61254	RPL26	-0.141523809032989	3.32481075645651	-5.73715895381147	0.00145399655616822	0.0694685637335367	-0.502610836831463
Q9H5Q4	TFB2M	0.163738092909133	3.42383057078372	5.71069818762407	0.001487728649821	0.0694685637335367	-0.520212392138983
Q96KR1	ZFR	0.116855318956636	3.34251835283031	5.90127612078965	0.00126340854719557	0.0684966755368632	-0.520348055082446
Q8IYD1	GSPT2	-0.190003221366333	3.41902751561926	-5.74810832313433	0.00144029629699647	0.0694685637335367	-0.521721565199526
Q99460	PSMD1	-0.0659113339050904	3.34493139681896	-6.00973996495226	0.00115323494745169	0.0655379149396252	-0.525600137674915
Q9H2Y7	ZFP106; ZNF106	0.127526906697471	3.42617728792527	5.69292171967909	0.00151089557559489	0.0694685637335367	-0.527139283735803
Q96T88-2	UHRF1	0.189665377785042	3.35387842028077	5.71116833360669	0.00148712150740618	0.0694685637335367	-0.5321731563291
Q5T440	IBA57	0.200658650607005	3.36202916781744	5.89718503927218	0.00126779561082307	0.0684966755368632	-0.547793374203889
Q9H4A4	RNPEP	-0.122642203561749	3.16447650549732	-5.68716933797824	0.00151848093439105	0.0694685637335367	-0.558878605305649
Q9H8Y1	VRTN	-0.122255119671781	3.60017087690303	-5.65151616765284	0.00156648351484643	0.0694685637335367	-0.560984352927399
Q96RU2-1	USP28	-0.0918705475429692	3.35210120411988	-5.68331714105121	0.00152358510405116	0.0694685637335367	-0.566031923339724
P61247	RPS3A	-0.151092564348699	3.35125025428655	-5.99717046385722	0.00116541829375835	0.0657433025714267	-0.571130377975276
Q96QC0	PPP1R10	0.127649232154901	3.34848918910233	5.67309825932608	0.00153722100623728	0.0694685637335367	-0.574183223383479
P49792	RANBP2	0.101093867896545	3.40508412813479	6.36153115437282	0.000865116864075056	0.0642412971343548	-0.57480616164968
Q8N0X7	SPG20; SPART	-0.129780313499432	3.1326153485877	-5.61667462501879	0.00161508620329938	0.070366401021688	-0.576406813011162
Q96EP5	DAZAP1	0.172609670663625	3.31995578831949	5.58902771840823	0.00165488822689467	0.070929064115843	-0.597570820552086
Q9GZZ1-1	NAA50	-0.119808234161223	3.30721433935159	-5.6814586601885	0.00152605464869564	0.0694685637335367	-0.605699973737918
Q12996-1	CSTF3	0.114779513294332	3.35550269895936	5.67228707030142	0.00153830944148472	0.0694685637335367	-0.613490549982667
O75934	BCAS2	0.146232835913546	3.31878820116553	5.57905732181792	0.00166951784328874	0.0711561430009321	-0.622080404834513
Q92610	ZNF592	0.138988006611292	3.35849461203992	5.56174040250259	0.00169528168089492	0.0711561430009321	-0.628482319304587
Q96JH7	VCPIP1	-0.0967862541511844	3.2966677985234	-5.56040625981876	0.00169728547564788	0.0711561430009321	-0.640809151280041
P41236	PPP1R2	-0.202547021349053	3.19312294394506	-5.68539043269395	0.00152083554044814	0.0694685637335367	-0.640815583191344
Q5QJE6	DNTTIP2	0.108803221004614	3.4128276995721	5.6980429552538	0.00150417912202798	0.0694685637335367	-0.649606063059551
Q9UNH7-1	SNX6	-0.142481664714353	3.22417202389798	-5.53362330710842	0.00173809301681454	0.0713082867647119	-0.653280646012863
P31150	GDI1	-0.113497178452746	3.03789383433326	-5.61754797976816	0.00161384691645041	0.070366401021688	-0.667701165739356
P35573-1	AGL	-0.0944147569613856	3.28021026289218	-5.67328355401743	0.00153697250622603	0.0694685637335367	-0.680418275459496
O60216	RAD21	0.0969603771713176	3.34232652787277	5.60442192837856	0.0016325885534229	0.070366401021688	-0.68249168681632
Q9NR45	NANS	-0.111210321624149	3.10328901118386	-5.48979414871825	0.00180732856102716	0.0715703932498294	-0.683154485153983
Q9NY33	DPP3	-0.117191717247248	3.27414302461928	-5.50475518827144	0.00178334503634587	0.0715703932498294	-0.698934367563134
Q9NR09	BIRC6	-0.0663344161070366	3.34195412518112	-5.80378104642061	0.00137289297199358	0.0694685637335367	-0.699597602941558
Q9UL46	PSME2	-0.16901391464115	3.07335269189644	-5.46975420253844	0.00184003645267737	0.0715703932498294	-0.701259186913982
P02545	LMNA	0.155411784724437	3.30703258235311	5.74252279963565	0.00144726646804869	0.0694685637335367	-0.704879753832231
Q9HB71	CACYBP	-0.101991350181602	3.29040880723694	-5.71319708317018	0.00148450486386977	0.0694685637335367	-0.706971305597015
Q9UPU5	USP24	-0.0778190531834653	3.29160006967183	-5.65505607234114	0.00156164025116204	0.0694685637335367	-0.713635009575443
Q9BTE3-1	MCMBP	-0.0903202653709699	3.32861130862222	-5.50843099647231	0.00177750853257185	0.0715703932498294	-0.716927899649283
Q5T5X7	BEND3	0.160733936976631	3.46385822656359	5.54683132465877	0.00171782957987362	0.071238856955624	-0.721673246545921
Q8N1G0	ZNF687	0.164740017380027	3.39839760970168	5.47668550352385	0.00182864735861318	0.0715703932498294	-0.738451112860567
Q9HCM1	KIAA1551	0.126706663358443	3.41943117748212	5.42373573818462	0.00191774959769255	0.0724777089334839	-0.743230613233832
Q9ULM3	YEATS2	0.101324990892905	3.32501937024657	5.49715964771945	0.00179547520764267	0.0715703932498294	-0.745851484392143
P30042-1	C21orf33; LOC102724023	0.204343321432429	3.25968065126084	5.41257235991168	0.00193716510497434	0.0726288773830662	-0.750243501588647
Q15424-3	SAFB	0.12454121165952	3.3748868133569	5.60728085682131	0.0016284853044948	0.070366401021688	-0.758180393764506
P27348	YWHAQ	-0.105727944534804	3.33669382954049	-5.49874418800784	0.00179293687662481	0.0715703932498294	-0.764043872389248
P54819	AK2	0.0936148883380935	3.19791913178863	5.53870570497106	0.00173026339322699	0.0713082867647119	-0.764897177175222
Q15020	SART3	-0.0736552181173316	3.28575664723001	-5.65163807879773	0.0015663164303364	0.0694685637335367	-0.775600443500084
Q9HC35	EML4	-0.0901526963951985	3.30336481553171	-5.65317431893533	0.00156421270142747	0.0694685637335367	-0.783099452053996
O43615	TIMM44	0.148735706949788	3.41271560310344	5.47698061521018	0.00182816424809575	0.0715703932498294	-0.785473935243207
Q8WTP8-2	AEN	0.324223895879773	3.39628204898275	5.9845814891887	0.00117776942522914	0.0659550878128316	-0.790732732302703
Q96DI7	SNRNP40	0.105893716362728	3.33201950538523	5.44595349793509	0.0018797688227411	0.0720802121101413	-0.804696386475815
Q15717	ELAVL1	0.116586401517441	3.36025361657996	5.4105634163113	0.00194068298534001	0.0726288773830662	-0.807937856252599
Q6PGP7	TTC37	-0.077782307792769	3.28159275221021	-5.48146030135135	0.00182084877334732	0.0715703932498294	-0.817835272596612
P60900	PSMA6	-0.0811797316722319	3.30120520993813	-5.51215196211651	0.00177162265677918	0.0715703932498294	-0.828475769679311
Q13206	DDX10	0.10336569868282	3.37032224592414	5.46233528130541	0.0018523170981509	0.0715703932498294	-0.828746848888757
Q15059	BRD3	0.129372714755921	3.35923275184062	5.31215906121316	0.00212232106474528	0.0728473336152158	-0.834461837767331
Q8TBC4-1	UBA3	-0.124584900614173	3.24914823983969	-5.30315315198751	0.00213989672982255	0.0728473336152158	-0.840388849774798
P35268	RPL22	-0.127934030332891	3.38254026269953	-5.3065407144861	0.00213326615864533	0.0728473336152158	-0.84757976978323
Q00796	SORD	-0.0984512175658935	3.31524257139401	-5.30596455543457	0.00213439222689289	0.0728473336152158	-0.848177643259903
P30414	NKTR	0.136310728252219	3.30353962618031	5.29527833986746	0.00215540181365852	0.0728473336152158	-0.848488307287389
Q8N5C7-1	DTWD1	-0.216491269693931	3.62823909378681	-5.44083513956061	0.0018884414278074	0.0720802121101413	-0.857089208944427
Q13177	PAK2	-0.150786298350396	3.20033678459588	-5.29354581702503	0.00215883031729048	0.0728473336152158	-0.859209557140847
Q14683	SMC1A	0.08506015690511	3.30557917176276	5.78282569701254	0.00139782861641646	0.0694685637335367	-0.863350395339233
O95391	SLU7	0.142913538428537	3.33305657661768	5.34369584039632	0.00206206629144746	0.0728473336152158	-0.86347646399388
Q01813	PFKP	-0.106534765791871	3.36068722833136	-5.42377515746818	0.00191768143587011	0.0724777089334839	-0.866442154801588
P40925-3	MDH1	-0.131902558099477	3.27876521331735	-5.37995028495806	0.00199520722336226	0.0728473336152158	-0.868985059032916
Q9UQR0	SCML2	0.111643410284672	3.25669410409596	5.32288093580924	0.0021016119599055	0.0728473336152158	-0.884155263084643
P32929	CTH	-0.140999973983738	3.15836474354234	-5.28061513297307	0.00218461729875731	0.0728473336152158	-0.890333326483321
O15212	PFDN6	-0.221880193405102	3.25178668973328	-5.2524988169846	0.00224191598563282	0.073504185648611	-0.892480146368545
P49790	NUP153	0.144236311863544	3.41914261482064	5.5621885619148	0.00169460918476374	0.0711561430009321	-0.901646180258639
P14923	JUP	0.114587538888169	3.42695964955167	5.33856094021951	0.00207174207748502	0.0728473336152158	-0.901888592187003
Q13523	PRPF4B	0.100668334483283	3.37572457788343	5.40266418192227	0.00195458666767116	0.072794120943559	-0.913654355620027
Q8TF72	SHROOM3	0.101312018540995	3.41214524194941	5.27625298957886	0.0021933959938888	0.0728473336152158	-0.916957266893921
Q9Y224	C14orf166; RTRAF	-0.0911484134500998	3.32810591908212	-5.34626381127594	0.0020572468609719	0.0728473336152158	-0.919483653029518
Q9Y4E8	USP15	-0.101388482272092	3.29022945925888	-5.29807124152425	0.00214988804903965	0.0728473336152158	-0.924547555051582
P18621-3	RPL17-C18ORF32; RPL17	-0.0754461396661776	3.3602543615948	-5.64169564569085	0.00158001052021058	0.0696657512129632	-0.927946333820413
O75683	SURF6	0.125975280150468	3.40295679711399	5.20090008957701	0.00235160901917329	0.0751977827467385	-0.928707860577188
Q96T23	RSF1	0.0920186559224461	3.37167690360755	5.55251821835366	0.0017091885459056	0.071238856955624	-0.935307681000469
O95639	CPSF4	0.126186301650286	3.40818484458575	5.17955041955301	0.0023987846923387	0.0751977827467385	-0.953473135474741
P08708	RPS17; RPS17L	-0.0930125173483534	3.36690692026971	-5.38809612835422	0.00198052917408224	0.0728473336152158	-0.957740840695378
Q9H0C8	ILKAP	-0.15913497831443	3.25234279591329	-5.21129468857959	0.00232902556198439	0.0751977827467385	-0.958748864996548
P17655-1	CAPN2	-0.112188543918695	3.0366808028646	-5.16451877729882	0.00243264991965736	0.0755598792858755	-0.967015795338003
Q9UH65	SWAP70	-0.113873294422073	3.35551037050789	-5.18389756548777	0.00238909173040502	0.0751977827467385	-0.977601557569145
Q14204	DYNC1H1	-0.0560570948611015	3.33455168390647	-6.20639221881751	0.000980508475310185	0.0642412971343548	-0.984922847297369
Q9BSY4	CHCHD5	0.177614528391882	3.34009032441813	5.30672244232712	0.0021329111237908	0.0728473336152158	-0.99698799452546
Q68CP9-1	ARID2	0.0939088768718959	3.38896851373973	5.31812700561127	0.0021107653681404	0.0728473336152158	-0.997007750343402
Q9H501	ESF1	0.116043292456405	3.37689756763349	5.28023336928404	0.00218538397790744	0.0728473336152158	-0.999082470358952
P18754-2	RCC1	0.107232314685498	3.28223882378715	5.39497663878114	0.00196822758460615	0.0728473336152158	-1.00047472991266
O43765	SGTA	-0.151598368465348	3.26716023738152	-5.13283518257249	0.00250583920642147	0.07751934835349	-1.00065702754321
Q0VF96	CGNL1	0.0886894104169552	3.47063702149294	5.29289644538253	0.0021601169743885	0.0728473336152158	-1.00074526756902
Q9H8H0	NOL11	0.097502081827802	3.3965992850558	5.36125504979741	0.00202936858049717	0.0728473336152158	-1.00602137295419
Q9BT78	COPS4	-0.109955998998808	3.25810031226856	-5.28923271477681	0.00216739273569155	0.0728473336152158	-1.00977727536811
Q9UPX8-3	SHANK2	0.108715548367186	3.47132027494531	5.25618313669793	0.00223431047241464	0.073504185648611	-1.01309915163363
Q96P48-6	ARAP1	-0.0804291431664674	3.36133079033308	-5.18212356629031	0.00239304184321129	0.0751977827467385	-1.02309073854316
Q15287-1	RNPS1	0.144399407212088	3.34282025568992	5.08191398995571	0.00262881175848513	0.0789217718574158	-1.03464832047575
Q9Y520-4	PRRC2C	-0.0659051261627707	3.36901321391453	-5.69970492584184	0.00150200684699805	0.0694685637335367	-1.0596257278863
Q01082-1	SPTBN1	0.133011656605982	3.38711761432798	5.085528199549	0.00261985940703038	0.0789217718574158	-1.08651680699997
Q99598	TSNAX	-0.104871122264406	3.23045731962835	-5.07944925971719	0.00263493693327874	0.0789217718574158	-1.09053611213473
Q9BSJ2-4	TUBGCP2	-0.0955666389646958	3.23098726776585	-5.04421433248279	0.00272430949141021	0.0797744367103021	-1.10132246035798
Q92993-3	KAT5	0.151544260581989	3.37346397103617	5.03850725295448	0.00273910921920199	0.0798336600612822	-1.10355444727242
Q14914	PTGR1	-0.13354674103643	3.41094685626073	-4.99626580535384	0.0028515539224265	0.0807273863205022	-1.10947361170878
P29375-1	KDM5A	0.124537197357681	3.2779796390218	5.0066853374012	0.00282333509789192	0.0807273863205022	-1.11252240438178
P40123	CAP2	-0.112083207113988	3.2675497179744	-4.96620462936124	0.00293479109718529	0.0807743424483926	-1.13658476959767
O14686-1	KMT2D; MLL2	0.0812827928960463	3.37959241940852	5.20486791118994	0.00234295900543448	0.0751977827467385	-1.13764250431572
P13798	APEH	-0.0845939755065462	3.29942091765982	-5.02636351801806	0.00277090757117698	0.0802203882493201	-1.14024055168371
P14635	CCNB1	-0.115973979686917	3.38044965528426	-4.96163313235561	0.00294769087736834	0.0807743424483926	-1.14072555273887
Q8IZ73	RPUSD2	-0.100453629857555	3.32561012736275	-4.98356350770784	0.00288639210174838	0.0807743424483926	-1.14406751276149
Q99459	CDC5L	0.115310876532662	3.33227038661064	5.22027936833707	0.00230970529247223	0.0751977827467385	-1.15594980212777
P26368	U2AF2	0.0853246968098315	3.32286530248633	5.17838583319123	0.0024013890475692	0.0751977827467385	-1.15845822125227
Q96JM3	CHAMP1	0.097454354487867	3.39150708716178	5.26013573588975	0.0022261840029864	0.073504185648611	-1.16122019845764
O60749	SNX2	-0.106455959860825	3.27413949972253	-5.0027843329323	0.00283386249703082	0.0807273863205022	-1.16385055649511
Q13451-1	FKBP5	-0.125304307398833	3.26568194268897	-5.05312411769761	0.00270138685624108	0.079711692158006	-1.16504124562323
A6NDG6	PGP	-0.134862445825262	3.25221311558019	-4.93747720437498	0.0030169384815076	0.0807743424483926	-1.16563974759498
Q96KQ7-2	EHMT2	0.0922465064032498	3.41365753276433	5.10635608046595	0.00256894358669553	0.0780959232923949	-1.17016804597348
Q9Y295	DRG1	-0.0936382121739197	3.33819732185649	-4.96898021614922	0.0029269904593123	0.0807743424483926	-1.18566202217833
P23434	GCSH	0.220621113917696	3.40679288159443	4.94291267000716	0.00300119609486844	0.0807743424483926	-1.18924432878728
Q9NYV4-2	CDK12	0.0811932403927647	3.36613315785512	5.00566516486449	0.00282608385171629	0.0807273863205022	-1.19091010096232
Q9Y5X3	SNX5	-0.10743678087854	3.26419108931338	-5.00049361467817	0.0028400652214368	0.0807273863205022	-1.19278521450315
Q9NTZ6	RBM12	-0.0918919422549048	3.30666871560545	-5.10739432934985	0.00256643526130666	0.0780959232923949	-1.19572904254813
Q96I51	WBSCR16; RCC1L	0.232299019197555	3.36435838736475	4.92752268569355	0.00304601426429858	0.0807743424483926	-1.19859413001922
Q14997	PSME4	-0.0922251107592359	3.32926040123805	-5.11457996457709	0.00254915195721046	0.0780959232923949	-1.21134062971692
Q86WB0	ZC3HC1	0.121448196575972	3.35312540639151	5.05480163044775	0.00269709575245701	0.079711692158006	-1.21227710192786
Q96GM5	SMARCD1	0.107897083105408	3.39116598424869	4.99235949654965	0.00286221620363679	0.0807313335084613	-1.2229446602012
Q8IYQ7	THNSL1	0.185440967845636	3.3588504570433	4.87021920106899	0.00321974465627403	0.0821465344945432	-1.22294959304916
Q8NBF2-1	NHLRC2	-0.110997045415885	2.99799141466631	-4.93020343442376	0.00303815279963273	0.0807743424483926	-1.22781905160077
Q14738-1	PPP2R5D	-0.150305831297336	3.32012254171293	-4.86490081650026	0.00323643444453012	0.0821465344945432	-1.22918521425549
Q96QT6-1	PHF12	0.131923440821616	3.38147630974025	4.86259003674502	0.00324371672567751	0.0821465344945432	-1.23121216983026
Q9H6W3	C14orf169; RIOX1	0.131009962054729	3.4162221138997	4.85932370749026	0.00325404228131919	0.0821465344945432	-1.23912452677772
O75937	DNAJC8	-0.102257423402436	3.24634084603122	-4.91069972151568	0.00309588227048796	0.0815512601341236	-1.23956735243322
O75648-1	TRMU	0.201256120029879	3.33642007502641	4.95739003516731	0.00295972197596497	0.0807743424483926	-1.24457327026761
Q9ULD4	BRPF3	0.12769372916592	3.40060143486241	4.8378780238936	0.00332277562238941	0.0821465344945432	-1.25222993800665
Q9ULL5-3	PRR12	0.0933226776107494	3.41204516209563	4.92506116307124	0.0030532532990138	0.0807743424483926	-1.25642106629221
Q5T4S7-1	UBR4	-0.0665030029441097	3.36097203199662	-5.45986500547433	0.0018564270407607	0.0715703932498294	-1.2570241206033
O95394-4	PGM3	-0.109088827336388	3.22372581635363	-4.92544965254405	0.00305210949476595	0.0807743424483926	-1.27135652453807
P35606	COPB2	-0.088798604176264	3.2592523548377	-5.16776182842606	0.00242529749223693	0.0755598792858755	-1.27496736062683
Q9NYH9	UTP6	0.0807728197658311	3.39747420756948	4.99993726666052	0.00284157402154677	0.0807273863205022	-1.27979881160737
Q15746-1	MYLK	0.0923084251032992	3.42077582403229	4.83524574753367	0.00333132563164133	0.0821465344945432	-1.2801820176459
Q7Z7F0-1	KIAA0907; KHDC4	-0.0969233519119674	3.28170731368354	-4.83607234140513	0.00332863803646215	0.0821465344945432	-1.28028035362421
Q16822-1	PCK2	0.131358624234185	3.41712842214537	4.82047623813712	0.00337976710735892	0.0828420870532192	-1.28436393673602
Q05397	PTK2	-0.0801386760205404	3.38348719183777	-4.96448785859828	0.00293962787751111	0.0807743424483926	-1.2858278574315
Q69YN4	KIAA1429; VIRMA	0.137182337883628	3.37348801764978	4.94028579127667	0.00300879240862426	0.0807743424483926	-1.28621943125681
O94855-2	SEC24D	-0.102735782128066	3.36660489708116	-4.94858938137264	0.00298485508250751	0.0807743424483926	-1.28686611956999
Q15393-1	SF3B3	0.0506797057392574	3.34660953233841	5.33166653971227	0.00208481531029836	0.0728473336152158	-1.28710425329045
O75525-1	KHDRBS3	0.141171547789841	3.3060233084121	4.81156728898928	0.00340937526986234	0.0833016785681015	-1.29600894008629
Q15029	EFTUD2	0.069806822427027	3.33173336085334	5.19052944498205	0.00237439069843753	0.0751977827467385	-1.29795586794293
Q6P4R8-2	NFRKB	0.0857718746072608	3.34652946241648	4.89041352820665	0.00315726069288073	0.0821465344945432	-1.30561976089665
Q86VP6-1	CAND1	-0.0908692190580746	3.28996455365146	-5.27686741671377	0.00219215703313366	0.0728473336152158	-1.30625187519296
Q96JM2-3	ZNF462	0.138773607087925	3.46587458952451	4.88234098199552	0.00318207069535081	0.0821465344945432	-1.30909605075857
P30084	ECHS1	0.173172404782107	3.39435201210676	4.90803046762861	0.00310388007809751	0.0815512601341236	-1.31132762778572
P61587	RND3	0.221279328599664	3.3385512374381	4.83237377803708	0.00334068284180103	0.0821465344945432	-1.31286778962443
Q8IVS2	MCAT	0.183209333628128	3.30647802551953	4.8010540798039	0.00344469629679441	0.0836319936360972	-1.32171285881926
Q8IWI9-4	MGA	0.12423302554375	3.40088137620013	5.11114410573522	0.00255739941242695	0.0780959232923949	-1.33469095718598
Q9BRT2	MNF1; UQCC2	0.192979590615138	3.33795177734523	4.87403358685447	0.00320783509294946	0.0821465344945432	-1.33921208055025
P62253	UBE2G1	-0.104264989245783	3.32808615562347	-4.75459565784795	0.00360586109688199	0.0854385559342402	-1.34505500624372
Q92922	SMARCC1	0.0858729843620124	3.41848032879718	5.18363502183669	0.00238967585780238	0.0751977827467385	-1.34711425789556
Q2M1K9	ZNF423	0.112281352903511	3.44105499281201	4.73989194598726	0.00365864650187204	0.0858383362763373	-1.34786463966047
P16152	CBR1; SETD4	-0.120945780649774	3.20393179046508	-4.85778564180183	0.00325891741694282	0.0821465344945432	-1.34945896913526
P55795	HNRNPH2	0.126112712336471	3.31512791593363	4.74362654182455	0.00364515659143471	0.0858383362763373	-1.3644461408807
P26640	VARS; VARS2	-0.100095627619707	3.21977209331082	-5.07591204706886	0.00264375591336755	0.0789217718574158	-1.381292341649
P58317	ZNF121	0.193790531342491	3.43737407622556	4.72000157744812	0.0037314587631361	0.0867507625175156	-1.3886265329337
P20073-1	ANXA7	-0.0968648392411163	3.24864053135234	-4.75648885844296	0.00359912790587573	0.0854385559342402	-1.38926495756397
O95989	NUDT3	-0.200234838131239	3.30052958087088	-4.69784756256768	0.00381450802868116	0.0869949392881669	-1.39037190524125
Q92905	COPS5	-0.118049068412138	3.30372268282045	-4.79109617228247	0.00347853695554901	0.0841871783059053	-1.40027235646147
P00558	PGK1	-0.103184040478702	3.06375631387563	-5.34027611054141	0.00206850437176588	0.0728473336152158	-1.4070939273768
P46976-1	GYG1	-0.200119912998834	2.82123719108708	-4.71545485459955	0.00374833380924518	0.0868798096209335	-1.41590856673353
Q9BS26	ERP44	0.101981880822231	3.21815994116738	4.75590840307228	0.00360119077811253	0.0854385559342402	-1.42020515526423
Q6PKG0-1	LARP1	-0.0695694189648156	3.35972079648629	-5.03542374855348	0.00274714367259887	0.0798336600612822	-1.42055093001377
Q9BTV5	FSD1	-0.107779742645108	3.32092362267754	-4.66281429425682	0.00395017143664932	0.087194641796835	-1.42586825185012
Q9UKG1	APPL1	-0.120185291270227	3.24618913393129	-4.69605047339809	0.00382133661888846	0.0869949392881669	-1.42896276823464
Q16629	SRSF7	0.0994026403243869	3.37224750486592	4.65928807406681	0.00396412810995577	0.087194641796835	-1.43449126378527
Q9BV44	THUMPD3	-0.160740693169974	3.0576769236448	-4.74257659922193	0.00364894340286715	0.0858383362763373	-1.43608694211559
Q12849	GRSF1	0.148447891136553	3.43314028498785	4.83368031143613	0.00333642229184241	0.0821465344945432	-1.43749906745888
Q8IWA0	WDR75	0.112302287391379	3.39542094064606	4.89936594993044	0.00313000434893864	0.0819569739421749	-1.446996749857
P49589-3	CARS	-0.0928201344633521	3.28444550773518	-4.94872777380427	0.00298445797622225	0.0807743424483926	-1.44764831345138
Q53TQ3-2	INO80D	0.143628092149675	3.40570346909025	4.65226600916676	0.00399208874945384	0.0872940006618409	-1.45288570911917
Q5GLZ8-1	HERC4	-0.0986867320671716	3.30857082841046	-4.6963679801831	0.00382012914280268	0.0869949392881669	-1.45664039745922
Q99757	TXN2	0.258520589710349	3.29898479669743	4.66089294601652	0.003957769126774	0.087194641796835	-1.4577849093298
Q16658	FSCN1	-0.104995654495854	3.32266273733172	-5.06314303184477	0.00267587372770114	0.0795709427865238	-1.46627161094951
Q9Y6E2	BZW2	-0.110687908238138	3.31517412876521	-4.62478149369996	0.00410370697219046	0.0872940006618409	-1.47040008979104
Q562F6	SGOL2; SGO2	0.1220917276666	3.42784375508434	4.6797905956599	0.00388375784760067	0.087194641796835	-1.47278573916869
Q9NP61-1	ARFGAP3	-0.129226369632291	3.12782855174327	-4.59903254088405	0.00421150850364004	0.0875438645743971	-1.47336410126498
Q9NTJ3-1	SMC4	-0.0919306545883154	3.29288527296466	-5.10369972556827	0.00257537390419394	0.0780959232923949	-1.47588481740264
Q9H6F5	CCDC86	0.0880111967256236	3.35971228807001	4.66205880200409	0.00395315693762634	0.087194641796835	-1.4811471342079
O95219	SNX4	-0.122920512506692	3.2073950021931	-4.57366623273304	0.00432086845907552	0.0888043119514108	-1.49440952779012
Q7Z6E9	RBBP6	0.0962908430810695	3.36270678127909	4.85415843936152	0.00327044743130337	0.0821465344945432	-1.49459767145788
Q9H336	CRISPLD1	0.131891491361545	3.39998215980244	4.59656530037899	0.00422200598182051	0.0875438645743971	-1.49626308539231
Q9BVL2	NUPL1; NUP58	0.0960244463568468	3.41809118972315	4.61289787161286	0.00415306442147705	0.0872940006618409	-1.49894205352435
Q9NVA2-2	SEPT11	-0.117611731323354	3.31579041971662	-4.57000780931407	0.00433690565421091	0.0888043119514108	-1.50001165208321
Q86SQ0-1	PHLDB2	0.0841027379777351	3.43559301028235	4.70253946066338	0.0037967451365243	0.0869949392881669	-1.50122494876767
Q2TAY7	SMU1	0.0935745868344764	3.33892433651202	4.61425539394098	0.00414739205448476	0.0872940006618409	-1.50307184979796
Q13867	BLMH	-0.155924070927938	3.25501254439323	-4.75614765703376	0.00360034033359604	0.0854385559342402	-1.50333410465589
P36551	CPOX	0.122496206837502	3.26025139348063	4.68724844481867	0.00385498434592919	0.087194641796835	-1.50794202788082
P21399	ACO1	-0.0986854952448219	3.26263090152296	-4.70718796658781	0.00377923936911478	0.0869949392881669	-1.50806912256034
P28482	MAPK1	-0.128841876238878	3.22248123961263	-4.56915140772917	0.0043406695753101	0.0888043119514108	-1.50845894991961
Q15642-2	TRIP10	-0.127089046392517	3.32752094530196	-4.61300213216684	0.00415262845907568	0.0872940006618409	-1.51093382165662
Q9BSC4-1	NOL10	0.0964448584734444	3.37300817339767	4.66717722906181	0.00393298042826452	0.087194641796835	-1.5158664865271
P15880	RPS2	-0.130306811470117	3.33645299145745	-4.94899006715471	0.0029837055114803	0.0807743424483926	-1.52602211521649
P15374	UCHL3	-0.0979597054087566	3.17948455681194	-4.57242458118454	0.0043263038361407	0.0888043119514108	-1.52681912135353
Q02543	RPL18A	-0.092517312968062	3.35358315886259	-4.84071720530711	0.00331358160684021	0.0821465344945432	-1.52976497874957
Q1KMD3	HNRNPUL2	0.103988619170858	3.32165995603	4.9598945008228	0.00295261391475779	0.0807743424483926	-1.53065193044668
Q86Y56	HEATR2; DNAAF5	-0.100975475964134	3.29326980201399	-4.60234659161447	0.00419745475104812	0.0875438645743971	-1.53900216770101
Q6WCQ1-2	MPRIP	0.120564778554753	3.37728012079191	4.72549743860524	0.00371117642913581	0.0865414758794224	-1.54576497618033
O76094	SRP72	-0.0950540047384544	3.28662752950579	-4.75393962960524	0.00360819761766082	0.0854385559342402	-1.55166441493481
Q8N1F7-1	NUP93	0.0734053758899565	3.35913924230468	4.96630555441541	0.00293450703694178	0.0807743424483926	-1.55211533230277
Q9NYK5-1	MRPL39	0.184032300507286	3.41465362150481	4.6006525520793	0.00420463191601892	0.0875438645743971	-1.55664028999788
Q76FK4	NOL8	0.128046823702451	3.36551328683834	4.70086008427104	0.00380309218127879	0.0869949392881669	-1.56409344820057
Q8WW12	PCNP	-0.0966205585569143	3.30243281749821	-4.52645103006917	0.00453313438153299	0.0905666121451286	-1.56912243587816
P49591	SARS	-0.121101176380646	3.19902996866375	-4.63002203517628	0.00408215320904928	0.0872940006618409	-1.57036276227
O96019-1	ACTL6A	0.122952175612485	3.35754726042332	4.59194234824915	0.00424175568648491	0.0877163062714615	-1.57279214028535
P78364	PHC1	0.100415020681029	3.42569537661306	4.56204323841103	0.00437205402158831	0.0890325258784718	-1.58104431797905
P43490	NAMPT	-0.111041900564247	3.15828321992362	-4.68690589876679	0.00385630060934082	0.087194641796835	-1.58532682416069
Q13107-1	USP4	-0.0987573593529895	3.32648490963726	-4.55615582594244	0.00439824391396517	0.0890325258784718	-1.58800333108982
Q9H3K6-1	BOLA2B; BOLA2; LOC107984053	-0.170550702767747	3.14402506962229	-4.55683868801056	0.00439519710772971	0.0890325258784718	-1.58816311336921
Q8NEJ9	NGDN	0.124266809042793	3.38612192599804	4.47205654918509	0.00479250927975228	0.090876258861624	-1.58963981488537
Q9UMS4	PRPF19	0.132513593568946	3.30536098195441	4.8021218010841	0.00344109012070268	0.0836319936360972	-1.59016715546531
Q86Y91	KIF18B	0.123119954734193	3.35634342528446	4.48317640296743	0.00473814319231546	0.090876258861624	-1.59070617279592
Q92979	EMG1	0.100585081314065	3.39706682019155	4.50357923947201	0.00464020300963555	0.090876258861624	-1.59122504900815
Q05048	CSTF1	0.0970679898290446	3.38658573945542	4.63103424432067	0.00407800496450278	0.0872940006618409	-1.59258344976156
Q14240-2	EIF4A2	-0.089225596603322	3.25467061715762	-4.55266728269136	0.00441384667037478	0.0891132411976719	-1.5935090227109
Q99714-1	HSD17B10	0.164329917524448	3.33930664705314	4.55820415490554	0.00438911183575213	0.0890325258784718	-1.59703353481693
P06737-1	PYGL	-0.109755421198299	2.91671914572	-4.66311831813431	0.00394897074087082	0.087194641796835	-1.59710460376932
P43897	TSFM	0.154598026772494	3.36232044016987	4.46370304062116	0.0048338164720094	0.090876258861624	-1.59782750215916
Q92785	DPF2	0.106172621586105	3.42041609130353	4.51930067707051	0.00456630244902462	0.090758218624137	-1.59964918743173
P51991-1	HNRNPA3	0.11996464644862	3.4044086160886	4.86957857623598	0.00322174980884558	0.0821465344945432	-1.60480627622688
Q12906-7	ILF3	0.113337489322173	3.38815709293896	5.20841479034612	0.00233525749816525	0.0751977827467385	-1.60481455410443
Q9BRK4	LZTS2	0.134898863157757	3.41135388079045	4.46965277894645	0.00480435444974251	0.090876258861624	-1.61012921746843
P52732	KIF11	-0.0982345127625462	3.3169444537007	-4.77244453908012	0.00354294715483267	0.0852084343945964	-1.61185214705598
Q8NI36	WDR36	0.0849132222855027	3.37136946736124	4.63913037874158	0.00404499739336469	0.0872940006618409	-1.61624486993758
Q8N3Z6	ZCCHC7	0.127499619947482	3.41272228567595	4.44851323562113	0.00490996837377887	0.0911686707129278	-1.61660008332846
Q92552-2	MRPS27	0.189072719014116	3.40902229803282	4.47228716719902	0.00479137459692667	0.090876258861624	-1.62153671849312
P23786	CPT2	0.164158797370777	3.3804825870053	4.4995155010691	0.00465952545711367	0.090876258861624	-1.62235901679194
O75821	EIF3G	-0.0825236759085673	3.32344218660756	-4.68106226497636	0.00387883430867268	0.087194641796835	-1.62276936742849
P00568	AK1	-0.160830057806351	3.10088599907101	-4.43682984107642	0.00496946839551447	0.0916484652172765	-1.62297286418523
Q53GS7-1	GLE1	0.113570154445605	3.35043550363934	4.48092238189543	0.00474910649886624	0.090876258861624	-1.62777555738905
P29762	CRABP1	-0.170833987105687	3.4237333608714	-4.48536347605429	0.00472753297755574	0.090876258861624	-1.63186366925766
O60716-3	CTNND1	0.0791464431476338	3.40856338048254	4.83769963295024	0.00332335427019064	0.0821465344945432	-1.6345490469635
Q9H993	C6orf211; ARMT1	-0.185465060555076	3.3484132380169	-4.46779122749964	0.00481355054338199	0.090876258861624	-1.6352611419976
P61221	ABCE1	-0.112744948435237	3.29430157533042	-4.63364260370619	0.00406733745104954	0.0872940006618409	-1.63530622747834
Q86U86-1	PBRM1	0.10045383901311	3.37858451689404	4.86333215596712	0.00324137594592415	0.0821465344945432	-1.64414168626797
Q9BRD0	BUD13	0.101650868363921	3.38591585843845	4.4377433944434	0.004964786566594	0.0916484652172765	-1.65283532792945
P49757	NUMB	0.123786909116574	3.39871084577679	4.41854068073095	0.0050642599508165	0.0919196626654739	-1.65384922103099
Q96G03	PGM2	-0.119868899076243	3.24764897511156	-4.61458835571423	0.00414600212987524	0.0872940006618409	-1.66187362303235
Q9HCL2	GPAM	0.191626062590001	3.26902650876505	4.44721184344581	0.00491655579796762	0.0911686707129278	-1.6638558338289
P36871-1	PGM1	-0.168119083193239	2.90773275289884	-4.4465941772221	0.00491968582835664	0.0911686707129278	-1.66505083227059
P52630-3	STAT2	-0.116240034129739	3.14640153150839	-4.38321301531756	0.00525322735407398	0.0932934265288323	-1.67437400858927
P14902	IDO1	-0.131085516822581	3.42557304028372	-4.37725664716633	0.00528586938492505	0.0936563277624595	-1.679630431879
Q5VZL5	ZMYM4	0.104701163614072	3.41911989788758	4.72682807592817	0.00370628465109478	0.0865414758794224	-1.67978710019232
Q86TU7	SETD3	-0.101713808548735	3.32822102370874	-4.40586212127336	0.00513117616469051	0.092626784789425	-1.68044032844966
Q9Y6W3	CAPN7	-0.0986010081035508	3.12854640999624	-4.39808166985793	0.00517273703116113	0.0927225198669818	-1.68067526891231
P25789	PSMA4	-0.0925927787001376	3.30816738068073	-4.60023415707335	0.00420640668582101	0.0875438645743971	-1.68362777687804
Q149N8	SHPRH	0.0974879693889556	3.31292242743928	4.51254018352113	0.00459791588743862	0.090876258861624	-1.68484867031354
Q7Z3K3-1	POGZ	0.120048867742663	3.38853125956854	4.65869211513596	0.00396649243835968	0.087194641796835	-1.69552718068068
Q14678-1	KANK1	0.088139274605458	3.3956439794437	4.48402155492335	0.00473403987813744	0.090876258861624	-1.70342066139992
A0AVT1-1	UBA6	-0.119026695174646	3.20730840586942	-4.61298838931501	0.00415268592142223	0.0872940006618409	-1.70531328211419
Q9GZN8-2	C20orf27	-0.104729988763819	3.31768739361186	-4.35407044396858	0.00541514241509815	0.0944281240343713	-1.71068015930386
P62158	CALM3; CALM2; CALM1	-0.317269074073773	3.16422345935878	-4.34964838411946	0.00544020214066634	0.0944281240343713	-1.7160000702737
P13196	ALAS1	0.162847422166831	3.37577929064215	4.39103191303775	0.0052107246809078	0.0929976094989194	-1.71826625737303
Q15054	POLD3	-0.107178140893647	3.32799044646305	-4.36070004645249	0.00537781730243818	0.0943153918153039	-1.72674429333267
Q9Y5J1	UTP18	0.118256931530866	3.37756758431003	4.52391702425954	0.00454485736129751	0.0905666121451286	-1.73144382262123
O75818-1	RPP40	0.105902333618921	3.3004117928328	4.35235405787814	0.00542485357390033	0.0944281240343713	-1.73738819656534
O75223-1	GGCT	-0.124495208519782	3.24328416080163	-4.33662234156639	0.00551478758345053	0.0946708948957327	-1.74107862650706
O94808	GFPT2	-0.11006864867018	3.41772966804451	-4.53375738794889	0.0044995251377165	0.0903674263260759	-1.74234386415085
Q0ZGT2	NEXN	0.120289624159746	3.39485525498497	4.33776811970464	0.00550818073395472	0.0946708948957327	-1.74432233978842
Q96T76-8	MMS19	-0.0828566806721126	3.31257772232708	-4.45506861158526	0.00487693813264025	0.0911686707129278	-1.74696409004076
P11177	PDHB	0.132512676329937	3.39960122351478	4.52423118474177	0.00454340210303547	0.0905666121451286	-1.74936416984626
P49454	CENPF	0.076916335270445	3.38312135006514	5.04546872499851	0.00272106884189701	0.0797744367103021	-1.75741489702451
Q69YQ0-1	SPECC1L	0.073795035580285	3.36386339366567	4.48078796820871	0.00474976118156144	0.090876258861624	-1.77649686171827
Q13153	PAK1	-0.101349161408726	3.37863267673828	-4.32213263773782	0.00559911833812297	0.094748506093388	-1.77757198422327
Q6YN16	HSDL2	0.11651947166563	3.21054741554777	4.37270524552041	0.00531096696019626	0.0936683644106338	-1.78131951904616
Q01081	U2AF1; LOC102724594; U2AF1L5	0.112171762611512	3.29466609473059	4.42143252140626	0.00504913609611462	0.0919196626654739	-1.78518581932811
P42224-1	STAT1	-0.0971573608495521	3.34392064991393	-4.51089399063614	0.00460565141582342	0.090876258861624	-1.78645093549662
Q8NI27-1	THOC2	0.104467989597071	3.34099897380924	4.62165273281185	0.00411663693761389	0.0872940006618409	-1.78756958891795
Q7Z589-5	C11orf30; EMSY	0.0988203063338184	3.38207840399046	4.4005177463827	0.00515968331448714	0.0927051297160312	-1.78886827283297
P55201-2	BRPF1	0.11792850452734	3.29241440794061	4.26226796974267	0.00596336452378602	0.094748506093388	-1.78946730327732
Q92794	KAT6A	0.138807477586894	3.20740740255668	4.26628525482968	0.00593809852578687	0.094748506093388	-1.79015484708546
P98179	RBM3	0.0999849025497172	3.29407111072251	4.27078116584814	0.00590996584930269	0.094748506093388	-1.79125147635669
P23193	TCEA1	-0.111175758147994	3.32847708941834	-4.42166362038759	0.00504792969892246	0.0919196626654739	-1.79161327729324
Q96JM7-2	L3MBTL3	0.141065928443404	3.34524551298448	4.30604609883932	0.00569445858023129	0.094748506093388	-1.79209980885099
P00390	GSR	-0.0664389417454117	3.20584235747919	-4.46151944704174	0.00484468064056364	0.090876258861624	-1.79485820903668
P36405	ARL3	-0.118717009978982	3.22943392213932	-4.25579750163099	0.00600431558178313	0.094748506093388	-1.79603973627411
Q9H0E9-2	BRD8	0.102570887977512	3.36819424130867	4.32518598923087	0.00558122689427989	0.094748506093388	-1.79658563053083
Q13642-4	FHL1	-0.198458130967661	2.89067609932443	-4.27180636633405	0.00590357190894206	0.094748506093388	-1.79723254237406
Q13148-1	TARDBP	0.106743235292553	3.36335468446865	4.43033608012986	0.00500289272848343	0.0919196626654739	-1.79899741877295
Q15437	SEC23B	-0.0683227835931884	3.28694235319867	-4.42632161186807	0.00502368335240626	0.0919196626654739	-1.79946648177337
Q13247	SRSF6	0.111301313982413	3.35570949555884	4.35950327597847	0.00538453357861094	0.0943153918153039	-1.80233270032218
Q8WUA2	PPIL4	-0.0734542153989494	3.30471244096716	-4.38905178658182	0.00522145144144986	0.0929976094989194	-1.80404123462597
P27708	CAD	-0.0722753403364898	3.36888402656917	-4.88444874384708	0.00317557134206234	0.0821465344945432	-1.80701447464948
P16333-1	NCK1	-0.111770551895918	3.2720733057881	-4.26236113548344	0.00596277719818834	0.094748506093388	-1.81166905775532
P32321-2	DCTD	-0.167592471390589	3.31935946040571	-4.28456700747493	0.0058246385036926	0.094748506093388	-1.81170449240379
Q9HAV7	GRPEL1	0.16205936387018	3.34912366869853	4.298338537301	0.00574078960511791	0.094748506093388	-1.8157030147179
Q13127-1	REST	0.123691828332625	3.37418974823038	4.22900181147475	0.00617732447817876	0.0960717474374196	-1.82285157183001
Q9UKY7	CDV3	-0.172924946592884	3.04032122420713	-4.27092664587372	0.00590905804671028	0.094748506093388	-1.82374354394803
P20810-6	CAST	-0.101947847711851	3.16765057136764	-4.3499950367669	0.00543823292640325	0.0944281240343713	-1.82427648292461
Q15361	TTF1	0.130543669018941	3.4114120835691	4.33944807291153	0.00549850990302042	0.0946708948957327	-1.82598815550806
Q7Z3U7-1	MON2	-0.0832579906035846	3.28785519917961	-4.3147443854516	0.00564268003091198	0.094748506093388	-1.82691695515034
P51688	SGSH	0.247149785638973	3.22393720559814	4.47883329365845	0.00475929331763903	0.090876258861624	-1.82834485890356
O14929	HAT1	-0.10016759010116	3.28818064104279	-4.27650789297973	0.0058743496756911	0.094748506093388	-1.8345108092421
Q9H9J4-2	USP42	0.132734960779412	3.39702200845367	4.27446248167121	0.0058870427159036	0.094748506093388	-1.83459319148731
O95571	ETHE1	0.169953379166465	3.36597438262431	4.29012510173416	0.00579063189628152	0.094748506093388	-1.83524781363501
O75439	PMPCB	0.15162493535594	3.37499514233852	4.29397292288276	0.00576722108794982	0.094748506093388	-1.83569234819701
Q92541	RTF1	-0.124102038917278	3.30162029939908	-4.47992727309626	0.0047539557604472	0.090876258861624	-1.83726766495991
O75390	CS	0.156064065705962	3.32275649466381	4.28117692103015	0.00584549137298411	0.094748506093388	-1.84020746895346
Q9Y4C8	RBM19	0.124222580069547	3.40943096594578	4.32312502486904	0.00559329622127853	0.094748506093388	-1.84082242826109
Q8WYQ5-1	DGCR8	0.109785714811981	3.35314321380508	4.3134795236693	0.00565017617262505	0.094748506093388	-1.84147576321019
Q66K14-1	TBC1D9B	-0.0973340782609176	3.187837437953	-4.22967642823424	0.00617290014160519	0.0960717474374196	-1.84337002565661
Q5VYK3	KIAA0368	-0.0837432651924023	3.35056695326556	-4.78358653750456	0.0035043082870417	0.0845441923842261	-1.84384335428902
Q86VM9	ZC3H18	0.0804700641822417	3.33745177742491	4.37423115992102	0.00530253766018755	0.0936683644106338	-1.84827205766721
P27816-1	MAP4	-0.0727924582782428	3.33619816139345	-4.61375829506366	0.00414946814405227	0.0872940006618409	-1.85341361602813
Q6PCE3	PGM2L1	-0.137852591664419	3.4037504931407	-4.36201338597549	0.00537045776634009	0.0943153918153039	-1.8645181991081
Q8TF39	ZNF483	0.101970345783994	3.45601999232754	4.31418172589811	0.00564601321355116	0.094748506093388	-1.87070092591132
Q8TDY4-3	ASAP3	-0.101564024919283	3.38361529230269	-4.2342726495765	0.00614285197984026	0.0959836260475244	-1.87170884347137
Q9Y2T2	AP3M1	-0.0982420761100987	3.29910920100205	-4.21489611882295	0.00627066028461624	0.0960717474374196	-1.87465281224982
O15056	SYNJ2	-0.0879119555477316	3.36562446946765	-4.23833707781827	0.00611641824459122	0.0957656342295996	-1.87925962533359
Q13043-1	STK4	-0.102991819286132	3.09483702925845	-4.21085938043483	0.00629766368616188	0.0960717474374196	-1.88003157701802
Q9H7N4	SCAF1	0.130746385289255	3.36475508620892	4.21804555267955	0.00624968333483061	0.0960717474374196	-1.88003999408012
Q96I15-1	SCLY	-0.113752653650485	3.19155746979785	-4.16584777554527	0.00660784073693311	0.0976466481348418	-1.88267423277699
P21912	SDHB	0.144154486301045	3.26107614536799	4.21236156344502	0.00628759963540564	0.0960717474374196	-1.88517842809056
P33176	KIF5B	-0.0677395148079124	3.25804278632202	-4.45210670360475	0.00489183081390875	0.0911686707129278	-1.89614510058146
Q05655	PRKCD	-0.0970434554664911	3.30128032359206	-4.21520086458503	0.00626862703596407	0.0960717474374196	-1.89751071754906
Q53T59	HS1BP3	-0.164097054126802	3.11685862072204	-4.26110873427014	0.0059706779312042	0.094748506093388	-1.90018799992543
Q99961	SH3GL1	-0.108942254966643	3.34726163570969	-4.25682710653382	0.00599777805962728	0.094748506093388	-1.90060542254006
Q9NSC2	SALL1	0.171470646682745	3.41668334159696	4.13868059472284	0.00680338986562043	0.0988553163807575	-1.90949632360492
Q9BRJ2	MRPL45	0.131283530736562	3.40079854765234	4.17583953245109	0.00653752356085621	0.0976466481348418	-1.9118801104392
Q8IY37	DHX37	0.0926504759000996	3.37746393386585	4.3884993440696	0.00522444860454044	0.0929976094989194	-1.91357691328009
P48637	GSS	-0.0864126425730552	3.15318055036606	-4.27410164995584	0.00588928511937705	0.094748506093388	-1.9154324167611
Q5JSH3	WDR44	-0.111222313599473	3.331453630447	-4.48444722610962	0.00473197472159312	0.090876258861624	-1.91586379462381
P24928	POLR2A	0.0777064356254539	3.35985006214335	4.65890279650856	0.00396565642565007	0.087194641796835	-1.92094511210815
Q8IZL8	PELP1	0.108073918679993	3.38234442107703	4.46870468913283	0.00480903553361173	0.090876258861624	-1.92533301033689
Q9P0V3-1	SH3BP4	0.0954204231728328	3.40796398891355	4.20366979296808	0.0063460840552332	0.0960778737009573	-1.92633664726238
O00231-2	PSMD11	-0.0671637382964661	3.31741079623536	-4.54013500743116	0.00447041941218014	0.0900185242263676	-1.92898207381985
A1L390	PLEKHG3	0.0975941792421576	3.4394779408694	4.26076103120105	0.00597287350550176	0.094748506093388	-1.9294232393509
O00178	GTPBP1	-0.081671855848684	3.29751303553629	-4.25227297169798	0.00602675586204032	0.094748506093388	-1.93466735353388
Q14498-1	RBM39	0.0568431215597197	3.32846027448857	4.47265618574157	0.0047895595926456	0.090876258861624	-1.93610846029437
Q9UGM6-1	WARS2	0.245362182374923	3.33072429603863	4.40349689788362	0.00514377028508074	0.0926361634439893	-1.93993840066609
Q96RL1	UIMC1	0.124156319274248	3.30927045152068	4.15932834719198	0.00665418193402842	0.0977986279652606	-1.94686350389895
P78330	PSPH	-0.114437420567887	3.23357721940347	-4.09900444052933	0.00710083125764855	0.10029178526272	-1.95015343898891
O60306	AQR	0.0767839346441859	3.36145413057199	4.46531804699877	0.00482579902227745	0.090876258861624	-1.95165442522627
O60346	PHLPP1	0.084568153731328	3.38122081757494	4.20780433109618	0.00631818758566343	0.0960717474374196	-1.95500834857458
Q96FN4	CPNE2	-0.107321081902184	3.27418389317107	-4.09254570387597	0.00715062650400257	0.10029178526272	-1.95808184830864
Q8N0S6-2	CENPL	0.179093778484613	3.31370726559939	4.16531087198646	0.00661164332970627	0.0976466481348418	-1.95929420790109
P84103	SRSF3	0.0922392527685949	3.34803058240691	4.32746011124839	0.00556794350793895	0.094748506093388	-1.97005676654076
Q9NY61	AATF	0.118586962152784	3.374674843492	4.17713884582658	0.00652844189867386	0.0976466481348418	-1.97139453358254
Q5SZK8	FREM2	0.0886210535919088	3.4375660351757	4.3102685369319	0.00566925664232147	0.094748506093388	-1.97174420653837
Q969R5-1	L3MBTL2	0.100061729088662	3.3696862835756	4.10929316856821	0.00702231379071716	0.100213355865563	-1.97522049107269
P35998	PSMC2	-0.0743052131395465	3.3475250173507	-4.41120396801605	0.00510286088978805	0.0923328979869197	-1.98021804868467
Q9NVR5	DNAAF2	-0.138209673520826	3.40389979456117	-4.09311146798367	0.00714624889457457	0.10029178526272	-1.98421719548658
Q9NXH9-1	TRMT1	-0.0977880372059519	3.34477028607702	-4.12416818857616	0.00691052293838988	0.0997926690592053	-1.99389027995893
P61513	RPL37A	-0.121051160044493	3.29949184946327	-4.20697010656972	0.00632380506463724	0.0960717474374196	-1.99852560964008
P04080	CSTB	-0.204698044690943	2.57776613702614	-4.06738749717688	0.00734838145834626	0.100672825979344	-2.00376597453605
Q7Z2Z2	EFTUD1; EFL1	-0.0835398776038053	3.32664149052651	-4.30215253451961	0.00571781009760052	0.094748506093388	-2.00467351459733
Q9ULX6	AKAP8L	0.101197283862139	3.2903518815109	4.0644701116554	0.00737170993548533	0.100812403966209	-2.00662670222215
Q8TD30-1	GPT2	0.183159868121313	3.43319737621789	4.21311057035455	0.00628258837116426	0.0960717474374196	-2.00716710764959
Q7Z3E5	ARMC9	-0.123277805864412	3.34757265818326	-4.07329921343854	0.00730136406939797	0.100362747070766	-2.01231913685429
Q9BY89-1	KIAA1671	0.100768801586969	3.38864026943265	4.3411650490312	0.00548864582060864	0.0946708948957327	-2.01301249909899
O00203-1	AP3B1	-0.0881447661534023	3.31107072735296	-4.258291427274	0.0059884941590655	0.094748506093388	-2.02076759755408
Q9NR50-1	EIF2B3	-0.10865498951246	3.19407592793467	-4.14691655687216	0.00674342545675814	0.098356578144959	-2.02144115221841
Q9NWH9-1	SLTM	0.0972179463141936	3.412316670049	4.33643171675702	0.00551588764577587	0.0946708948957327	-2.02206023834768
Q9UGI8	TES	-0.112059756770313	3.05330529702875	-4.18605559462319	0.00646650078176353	0.0976466481348418	-2.02289364411091
Q13618	CUL3	-0.0821937365868419	3.32958155607411	-4.32515927560367	0.00558138314457981	0.094748506093388	-2.02411301294605
Q69YH5-1	CDCA2	0.131464025450299	3.45321331586188	4.28215524817319	0.00583946489072129	0.094748506093388	-2.02741846544798
Q9BRA2	TXNDC17	-0.182812830343412	3.32766140645546	-4.09652642226642	0.00711988975132334	0.10029178526272	-2.03789408513667
P62258-1	YWHAE	-0.0591593816727003	3.2477844384837	-4.6284168862558	0.00408874129283171	0.0872940006618409	-2.04031574544847
Q9Y262	EIF3L	-0.080257787614246	3.31393758224176	-4.31980737551498	0.00561278704670587	0.094748506093388	-2.04045708274273
Q9H707	ZNF552	0.19071721601689	3.38297160522169	4.04169703991823	0.00755670912935349	0.101889406749385	-2.0480431111088
Q14CX7-1	NAA25	-0.0839819152313083	3.29403276463727	-4.10861292592401	0.00702747464229315	0.100213355865563	-2.0496236389629
Q08752	PPID	-0.0954388042691018	3.24710816515741	-4.10190393170128	0.00707860425550755	0.10029178526272	-2.05530739726271
Q9BYD1	MRPL13	0.201731331493326	3.38684570096626	4.00975898301366	0.00782504235382688	0.103163797277246	-2.05623546129594
Q6KC79	NIPBL	0.0878680344801252	3.37918548000449	4.42469348079078	0.00503214324667912	0.0919196626654739	-2.05859090136758
P49207	RPL34	-0.111761292884993	3.36406225519451	-4.08218790088443	0.00723130732665186	0.100325809682039	-2.06251779476574
O95900	TRUB2	0.174589905197719	3.40641519262746	3.97772096153974	0.00810504872823456	0.104566887318892	-2.06665304388325
O15297	PPM1D	0.217493802684639	3.28719684120169	4.15250223638762	0.006703096942947	0.0981415262333767	-2.06904034478034
Q6P3X3	TTC27	-0.0940243724188622	3.34930902086556	-4.10254976271212	0.00707366412407778	0.10029178526272	-2.07315525889803
Q86WG5	SBF2	0.0885209889469809	3.40659308576007	4.07707149212978	0.00727153953381908	0.100336782919892	-2.07624022511076
P62851	RPS25	-0.131948968598067	3.33447256038235	-4.06132587926145	0.00739694592144068	0.100977525105503	-2.07770718566708
P55039	DRG2	-0.111306534302583	3.26026446232646	-4.05296792942599	0.00746450280387113	0.101246955001986	-2.07963138111879
Q9NQS7	INCENP	0.110742991078046	3.40748403499815	4.09072276921337	0.00716475208560743	0.100306529198504	-2.0810427025441
O60343-1	TBC1D4	-0.0599954990414521	3.25423787337469	-4.20914632390182	0.00630916274423828	0.0960717474374196	-2.08286394755651
O00151	PDLIM1	-0.0870455952729647	3.31954515131653	-4.16435971076953	0.00661838595283078	0.0976466481348418	-2.08299233596138
O60566-3	BUB1B	-0.109521227842229	3.37315895249862	-4.30470159186549	0.00570250998467492	0.094748506093388	-2.08346580254716
Q86W42	THOC6	0.147163740166468	3.32600104270417	3.96124180020338	0.00825345531022167	0.105183570000034	-2.09219238485241
Q96CS4	ZNF689	0.191817006548672	3.38859579840655	4.05235672744973	0.00746947035077216	0.101246955001986	-2.09343610942146
Q96E11	MRRF	0.134705771567835	3.37171391952828	3.95926815847519	0.0082714335474982	0.105237874256063	-2.09396016569278
O75530	EED	0.105809928157395	3.28731251855421	4.08377396387655	0.0072188865601595	0.100325809682039	-2.09409128000479
Q8N1G4	LRRC47	-0.0994926642591203	3.34293092499193	-4.18133976486111	0.00649917663295705	0.0976466481348418	-2.09592141158327
O15550	KDM6A	0.111256633295875	3.34880833930902	3.98225793840983	0.00806471907874431	0.104338153072726	-2.10206891234635
Q86YH6-1	PDSS2	0.191256184499145	3.40350455665511	3.94406997049804	0.00841136210130364	0.106312965471502	-2.10224185625155
O75362	ZNF217	0.116671124749632	3.36912855887558	4.07337286718302	0.00730078042625026	0.100362747070766	-2.10443947793548
O95409	ZIC2	0.130672441162319	3.44510837735668	3.93848041417092	0.00846349303894584	0.106467818356557	-2.10700544746233
Q70Z35-1	PREX2	0.0817622470350288	3.44635955111468	4.02750812285804	0.00767461842506101	0.102399430534031	-2.10723970101981
O43237	DYNC1LI2	-0.0730221838290048	3.35773129158538	-4.05323280163171	0.00746235121071154	0.101246955001986	-2.1130695695043
Q13884	SNTB1	0.120607878774287	3.42259993686066	4.009643296603	0.00782603363078167	0.103163797277246	-2.11528836708881
P51692	STAT5B	-0.087308614747305	3.31962572898055	-4.03839698060833	0.0075839491750389	0.101898525518211	-2.11551925892959
Q9Y6A5	TACC3	-0.0947577049371133	3.38317050194856	-4.26172433954771	0.00596679292552289	0.094748506093388	-2.11679648835842
Q9NZB2-6	FAM120A	-0.101658624350368	3.09395293255271	-4.05419553007052	0.00745453672339034	0.101246955001986	-2.11741344447027
Q15018	FAM175B; ABRAXAS2	-0.126562705920798	3.20530289820789	-3.92903828422751	0.00855238257982658	0.106862995362263	-2.12006209376027
P56945-3	BCAR1	-0.114266793462894	3.38240224703534	-3.99454864315092	0.00795659617845216	0.103966362729963	-2.1220966492317
O94804	STK10	-0.10840179266315	2.96589163524285	-4.03666281400524	0.00759830805011769	0.10191297090997	-2.12703348699842
Q96EK5	KIAA1279; KIF1BP	-0.0914608203827081	3.26305286133497	-4.0297475937592	0.00765587147450556	0.102327257756806	-2.12723254918915
P48444	ARCN1	-0.0832179052470989	3.26477770714767	-4.26198013676999	0.00596517946354945	0.094748506093388	-2.12743576962439
Q99549	MPHOSPH8	0.134076680815779	3.3368623730809	3.97078917557409	0.00816710528123364	0.104954826997696	-2.12948382002692
O43823	AKAP8	0.127027844501797	3.36923471913582	4.09577764255001	0.00712565998360548	0.10029178526272	-2.12975543889744
Q9H5I1	SUV39H2	0.12961705051733	3.43714091248654	3.93382307339036	0.00850720735303654	0.106645906556366	-2.13396685329946
O43143	DHX15	0.0650141666566266	3.38430736200498	4.5031095389733	0.00464243170437347	0.090876258861624	-2.13415137474462
Q12788	TBL3	0.0998178739960948	3.39250172275119	4.16063787140661	0.00664484422450389	0.0977986279652606	-2.13421318149755
Q9Y485	DMXL1	-0.0712720772885817	3.33959656736497	-4.08202208920632	0.0072326072213649	0.100325809682039	-2.1352379076811
P61289-2	PSME3	-0.0930140115462999	3.35111676332512	-4.02011122762798	0.0077369075452777	0.102694731293029	-2.13680835784334
Q12888-2	TP53BP1	0.0613836891461127	3.3975482304849	4.64396146899344	0.00402544613741265	0.0872940006618409	-2.13801694304334
P49903-1	SEPHS1	-0.0614690830079924	3.36924694757326	-4.1659074487002	0.00660741825737252	0.0976466481348418	-2.13845596661412
Q86W50-1	METTL16	-0.0918930572307205	3.298600770743	-4.02182124835063	0.00772245702541545	0.102680572441919	-2.14317307184207
Q5VIR6-4	VPS53	-0.0848977141079671	3.23051498469151	-4.01588842122344	0.00777272304155996	0.102991936398701	-2.14455855129895
P51587	BRCA2	0.0918616532289641	3.3870493104961	4.26793768083898	0.00592774106989289	0.094748506093388	-2.14551110284713
Q96BR5	SELRC1; COA7	0.110567814055994	3.37710483161339	3.98861272370694	0.00800861006151721	0.103966362729963	-2.1462516796548
P0DJD1	RGPD2	0.136132210914984	3.47509347778987	3.91311015327814	0.00870472200579396	0.10730623935872	-2.14714991601919
Q9UNY4-1	TTF2	-0.0569902926910792	3.37319525121003	-4.18308705012718	0.00648704803028145	0.0976466481348418	-2.14775274776103
Q8TD10	MIPOL1	0.122771263414182	3.35134579680947	3.93681201587489	0.00847912369862572	0.106467818356557	-2.15061055485357
Q9UI26-2	IPO11	-0.0810413199825717	3.31211789427015	-4.0867160963984	0.00719590982894404	0.100325809682039	-2.15243224417716
O00170	AIP	-0.116800224464502	3.06126759241603	-3.91718133181288	0.00866549630348395	0.107228528452143	-2.1562050677973
P04424	ASL	-0.125294610087843	3.23294646959487	-3.88768577397793	0.00895424825407268	0.107948763898979	-2.16042020597632
P07355	ANXA2	-0.101689632355604	2.92920250699694	-4.05034892581094	0.00748581501895056	0.101289546429257	-2.16157872423735
Q9NRR4-1	DROSHA	0.0940736855332192	3.37857741035997	3.91151351165786	0.00872016007535886	0.10730623935872	-2.16361354807939
Q86XK2-5	FBXO11	0.108801797532444	3.35953317758424	3.88666345503388	0.00896444856468984	0.107948763898979	-2.16672292499632
Q96MT8-2	CEP63	0.206125011299899	3.28474801527934	4.01029773401618	0.00782042784505684	0.103163797277246	-2.16675284585019
Q9Y2P8	RCL1	0.105888481015218	3.38009733589022	3.89466142863593	0.00888499493606088	0.107948763898979	-2.17519984905384
P22681	CBL	-0.0950952346437326	3.35460254264645	-3.98858213471702	0.00800887908933889	0.103966362729963	-2.17613672174657
Q7Z460-3	CLASP1	-0.0789449904597872	3.3342994392776	-4.27961341802745	0.00585513715363706	0.094748506093388	-2.1773753765451
Q9BW27	NUP85	0.118548961355333	3.36142970021036	4.03962370102693	0.0075738104167088	0.101898525518211	-2.18392983589929
Q3KQU3	MAP7D1	-0.0903443703007713	3.26170552783197	-3.9209773227821	0.00862910100135865	0.107228528452143	-2.18594689989068
O43172-1	PRPF4	0.102210444771328	3.32001719428225	4.15694534966583	0.00667121222180232	0.0978614534716394	-2.1865061010267
Q9Y678	COPG1	-0.0833572914173696	3.194716901816	-4.12290609409789	0.00691992960629526	0.0997926690592053	-2.18874522449142
P56211	ARPP19	-0.165909422980669	3.33220389329414	-3.86189299655228	0.00921563384781933	0.108772835200723	-2.18876471938741
Q8WUA4-1	GTF3C2	0.103744485279136	3.3521803125378	3.99331995607891	0.00796733132997568	0.103966362729963	-2.18890760353145
O15347	HMGB3	-0.118224801248454	3.37863141250829	-4.21671187367662	0.00625855666365993	0.0960717474374196	-2.19190337261326
Q9H583	HEATR1	0.0983136407761269	3.39175573147141	4.48814428835727	0.00471408127887809	0.090876258861624	-2.19257297307677
Q52LR7	EPC2	0.150850435746756	3.35538663673975	3.84852479748275	0.00935447247508371	0.10940169638543	-2.19603112136675
Q13526	PIN1	-0.104685801046475	3.22987263019861	-3.94896149169398	0.00836603764113862	0.106265299309297	-2.20464948703487
O60502	MGEA5	-0.124550331840407	3.36121724992386	-4.17068842648138	0.00657366840911974	0.0976466481348418	-2.20628388648381
Q9P2N6-3	KANSL3	0.10272539819033	3.37880609707589	3.8674632968176	0.00915846639914111	0.108358280325748	-2.21659294088019
P50336	PPOX	0.215291869083923	3.36569787981893	3.85298195037418	0.00930792232594232	0.109190183615641	-2.21981163337677
Q8NHP8	PLBD2	0.109949609769425	3.39013206824981	3.89401554970175	0.00889138178018758	0.107948763898979	-2.22041824868997
P38919	EIF4A3	0.0938905960103216	3.34479867692175	4.26356510278513	0.00595519316113628	0.094748506093388	-2.22854834875905
Q7Z478	DHX29	-0.0786449339986579	3.37041821150804	-4.22387448156075	0.00621106849018662	0.0960717474374196	-2.22926404939077
Q96PE7	MCEE	0.144898307389195	3.16284108757857	3.84862242287688	0.00935345008756962	0.10940169638543	-2.23147857539578
Q5TFE4	NT5DC1	-0.12601086466449	3.26365616758424	-3.96323368404542	0.00823535547895251	0.105127532836146	-2.23179704519257
Q06323-2	PSME1	-0.142229147631758	3.1114717437815	-3.94508904045454	0.00840189674145679	0.106312965471502	-2.23457437120892
P17026	ZNF22	0.160896013326454	3.41847698467426	3.81144993195589	0.00975196845710266	0.112463523350795	-2.24227020212204
Q10570	CPSF1	0.105649021393511	3.39891316607342	4.21905433875225	0.00624298105667934	0.0960717474374196	-2.24990387989862
Q13564-4	NAE1	-0.0974867411298763	3.26405853885704	-3.87202563953857	0.00911194015691037	0.108047611876069	-2.25515590436601
O75717	WDHD1	-0.0705921815846948	3.36132983285666	-4.13660818159594	0.00681857336502899	0.0988886481219328	-2.25744735156882
P48556	PSMD8	-0.0880783335290464	3.35487975871792	-3.91356098975207	0.00870036839296773	0.10730623935872	-2.25963788558914
Q8ND82	ZNF280C	0.163866567291018	3.32259894937288	3.79636256407438	0.0099191239494685	0.112463523350795	-2.26163624516648
Q05209-1	PTPN12	-0.127640204743523	3.40694654418508	-3.89070862595222	0.00892416359999216	0.107948763898979	-2.2657260923184
Q96IT1-2	ZNF496	0.18387750907354	3.46455130750774	3.89251549819804	0.00890623511961999	0.107948763898979	-2.26985252792324
Q9H0L4	CSTF2T	0.0868763250391433	3.38426687762484	3.83418583437391	0.00950600962444744	0.110836027110579	-2.27579711568947
P68036-3	UBE2L3	-0.152332633861728	3.23676045733314	-3.7738857149193	0.0101741406423066	0.113784266775184	-2.27607761533286
Q9Y6Q3-2	ZFP37	0.267620040154816	3.44153063515983	4.1650495998165	0.00661349467109361	0.0976466481348418	-2.28158148885281
P57740	NUP107	0.0876218427758033	3.3833836466888	4.10903319545303	0.00702428564448079	0.100213355865563	-2.28379083579121
Q6P1X6	C8orf82	0.278692272329958	3.34786787852763	3.89131233388375	0.00891816887019	0.107948763898979	-2.28459950616516
Q9BT73	PSMG3	-0.138328820218689	3.31509690821938	-3.75835130315217	0.0103546842587734	0.1146208268587	-2.28623958187909
O95376	ARIH2	-0.129820181468504	3.27776423332338	-3.76799854653033	0.0102421438996768	0.113880765214957	-2.2906632698467
O00754	MAN2B1	0.0826469089218676	3.3772479562945	3.87527720789197	0.00907894307894931	0.107948763898979	-2.29076260793865
P20936-1	RASA1	-0.0748769239178201	3.2158277367758	-3.86668916326477	0.00916638737375004	0.108358280325748	-2.29859131288068
Q8TD19	NEK9	-0.0741190853323535	3.22178059788467	-3.90252382337975	0.00880765880931368	0.107901021602193	-2.30066680152855
P23919	DTYMK	-0.0848002267429143	3.16593410905626	-3.79946068707893	0.00988453881528901	0.112463523350795	-2.30761588598605
Q14676	MDC1	0.127038938454481	3.35913287490134	4.24707772131849	0.00606000667225538	0.0950764237004975	-2.3084642770591
Q13825	AUH	0.157369273283489	3.40324247361677	3.73087605610837	0.0106828632534589	0.115729341353167	-2.31280631520377
Q9Y2D5-6	PALM2-AKAP2; PALM2; AKAP2	0.115560793795298	3.41356858539984	4.08518291307009	0.0072078729896343	0.100325809682039	-2.31315800419789
Q96L91	EP400	0.107838323826013	3.38824601226302	4.10896164507272	0.00702482845212881	0.100213355865563	-2.31446526615771
P11908-2	PRPS2	-0.127530659359335	3.19038747828879	-3.7839900939306	0.0100586004562387	0.113484680441563	-2.31583478362753
Q5TAX3	ZCCHC11	-0.068517031340337	3.30345366292295	-3.87695251167341	0.00906199442587396	0.107948763898979	-2.31723753134923
P09525	ANXA4	-0.110563697388799	3.21563980207915	-3.74553832243544	0.0105063027832055	0.114821018451215	-2.31944491446767
P53041	PPP5C	-0.109564339578516	3.3044611282067	-3.9183564251698	0.00865421129905621	0.107228528452143	-2.32075856092883
P42166	TMPO	0.0825600410960326	3.28317508108745	4.00091476146629	0.00790123502090079	0.103798416233477	-2.3214932565837
Q92576-1	PHF3	0.151532944262097	3.39062199805647	4.20320117402031	0.00634925468800643	0.0960778737009573	-2.32356859195451
O94822-3	LTN1	-0.0779828400339901	3.29983464098076	-3.99379351960985	0.00796319183134011	0.103966362729963	-2.32381323973194
Q14376	GALE	-0.120192704415722	3.23984386303315	-3.71653847715527	0.0108587326950932	0.116103729768303	-2.32732600520871
Q15022	SUZ12	0.104387737737482	3.34016832212617	3.82945033720116	0.00955665909604857	0.11108892209831	-2.32888081127063
Q13572-1	ITPK1	-0.138284289049498	3.35178703720006	-3.76668417104743	0.0102573958478454	0.113885298038596	-2.33341867251065
O15015-2	ZNF646	0.216610572947969	3.40494585157473	3.71151624346882	0.0109211016752704	0.116185616407132	-2.33447513178598
Q00341-1	HDLBP	-0.0795355096652625	3.26928594482735	-4.33266394019649	0.00553768192756932	0.094748506093388	-2.33463742274812
Q9NZJ4-1	SACS	-0.0535802097756783	3.31510136149069	-4.09654562134229	0.0071197418691067	0.10029178526272	-2.33505858372429
Q9H2D6	TRIOBP	0.0657938288289429	3.38839275152673	3.92005189954161	0.00863795792835452	0.107228528452143	-2.33700419748221
Q4VC31	CCDC58	0.110552548867464	3.37560907342449	3.73500303713876	0.0106328331405986	0.115545461550528	-2.33960100044606
O75694	NUP155	0.109375330375584	3.39509375859334	4.16773668956819	0.00659448222220263	0.0976466481348418	-2.3424607607962
P61086	UBE2K	-0.137008364635397	3.31751007901264	-3.73245287549349	0.0106637169092662	0.115717165668869	-2.34412993399316
Q04446	GBE1	-0.104183818491794	3.10592774417523	-3.78133689895345	0.010088795793612	0.113521249608325	-2.34773341085697
P17858-1	PFKL	-0.0876885971875385	3.11475996819695	-3.90143814900855	0.00881829256316153	0.107901021602193	-2.34860590252911
Q8NFH5	NUP35	0.0937906202710524	3.42188923164102	3.79591652601067	0.00992411435199273	0.112463523350795	-2.34957499540843
O43156	TTI1	-0.0894046532339878	3.34830642426319	-3.88259256097378	0.00900519611408831	0.107948763898979	-2.34972969513413
Q02750	MAP2K1	-0.102906212969146	3.24504569955008	-3.87730608533843	0.00905842194881466	0.107948763898979	-2.35057961442002
P62277	RPS13	-0.10080498361301	3.32644282977852	-3.81240872581124	0.00974145307995128	0.112463523350795	-2.35287408519322
Q13315	ATM	-0.0637426712904187	3.32538746695216	-3.99159667517829	0.0079824152854455	0.103966362729963	-2.35493199678026
O75822	EIF3J	-0.105782782936584	3.24740463021456	-3.98559032370416	0.00803524107602842	0.104132380971774	-2.35669178725445
Q15428	SF3A2	0.112805140031605	3.3318799350012	3.79708681852309	0.00991102677530908	0.112463523350795	-2.36110002380486
Q5SY16	NOL9	0.0980819932703202	3.37417555234208	3.80012976583125	0.00987708748886793	0.112463523350795	-2.36213431369052
O00458	IFRD1	0.194714655385063	3.33980035045496	3.68084185804018	0.011310846837261	0.118063696510838	-2.36312676284699
Q14315	FLNC	-0.0966620824401621	2.9283937468599	-4.02482903654706	0.00769711345833513	0.10252127509088	-2.3644439544153
P52565-1	ARHGDIA	-0.0990497870293367	3.11612513223168	-3.79934027219679	0.00988588050847655	0.112463523350795	-2.3675333933276
Q3T8J9-1	GON4L	0.0827825958145701	3.37170441919109	3.74270668037511	0.0105401447092262	0.114863622456226	-2.36768713361063
Q9Y696	CLIC4	-0.109157155885868	3.32300283648148	-4.08049510633007	0.00724459053230571	0.100325809682039	-2.36924141864922
Q13126-1	MTAP	-0.0941160649699988	3.29243532421386	-3.87630547619967	0.00906853611449347	0.107948763898979	-2.37618579292889
Q9H4Z3	PCIF1	-0.166229205094603	3.2083340281214	-3.7200198919096	0.010815732470088	0.116103729768303	-2.3792861774421
Q9H582-1	ZNF644	0.128975906172139	3.40974759965596	3.84116094418378	0.00943195373174217	0.110139952861379	-2.37989205006662
Q96JB5-4	CDK5RAP3	0.0826832079701303	3.29044844173816	3.75151988016199	0.0104352144973234	0.11469765848634	-2.38111151001195
Q99584	S100A13	-0.184369013752731	3.28689749635482	-3.68227714535116	0.0112922670699645	0.118063696510838	-2.38275829743543
Q15418-2	RPS6KA1	-0.102479986421005	3.30492464705612	-3.85828794706041	0.00925284570541161	0.108890942651417	-2.38322912542068
Q96QK1	VPS35	-0.0713550403448427	3.22584251756147	-3.92664510832852	0.00857507874611564	0.106972364455608	-2.39018135376491
Q9NTK5-1	OLA1	-0.117055595211944	3.28439454110907	-3.9392529704595	0.00845626620153684	0.106467818356557	-2.39138492607559
Q9GZU8	FAM192A	-0.145882131688847	3.2653842017303	-3.75271691693481	0.0104210530189855	0.11469765848634	-2.39530759614616
Q9UKM9-1	RALY	0.0933674156855702	3.33145972434068	3.87423216546389	0.00908953356083688	0.107948763898979	-2.40207514590073
Q70EL1-1	USP54	0.160942464094296	3.41702679474784	3.67289657692487	0.011414318805531	0.11842778715406	-2.40223355005816
Q9Y5B0	CTDP1	-0.0909787885386299	3.3477115310169	-3.77694212272687	0.01013903544769	0.113636645436897	-2.40239164373496
P09960-1	LTA4H	-0.114783516924665	3.27066557013729	-4.11235168277529	0.00699916230868631	0.100213355865563	-2.40342047574416
O14777	NDC80	-0.0850663696014625	3.33342407733047	-3.88678088356054	0.00896327624389657	0.107948763898979	-2.40354686850089
Q7Z4S6-4	KIF21A	-0.0639571625047129	3.17282261934756	-3.85817377787426	0.00925402693022994	0.108890942651417	-2.40549277679411
Q9P0M9	MRPL27	0.155535384412291	3.39649133650017	3.66198291450217	0.011558177852242	0.119346353273756	-2.40574864570798
O43813	LANCL1	-0.124917368306784	3.20301235353709	-3.63850874861433	0.0118745224785896	0.120088056645234	-2.40589508191328
Q9Y5Y6	ST14	0.129521860044224	3.32679758863745	3.75717816965042	0.0103684637434746	0.1146208268587	-2.41039269971558
Q93100-1	PHKB	-0.115078594551956	3.23499966235273	-3.71047778253424	0.010934047842277	0.116185616407132	-2.41065434476726
Q6FI81-1	CIAPIN1	-0.11546274268636	3.32022712063173	-3.7994605463404	0.00988454038331428	0.112463523350795	-2.41131326859549
P82932	MRPS6	0.144722709026175	3.42095426374398	3.63878091565206	0.0118707996895108	0.120088056645234	-2.41323003656883
P42765	ACAA2	0.150558681250582	3.40882246636248	3.97567744192193	0.00812328790954899	0.104566887318892	-2.41361258977115
Q969X6	CIRH1A; UTP4	0.121613739567861	3.3972800770808	3.93805718008921	0.0084674551055062	0.106467818356557	-2.41380995842185
O94964-2	SOGA1	-0.0997516323798801	3.29348098393811	-3.68347071357121	0.0112768423445103	0.118063696510838	-2.41397751472226
Q96HY7	DHTKD1	0.147044204463376	3.33577997191994	3.81193744190444	0.00974662020022806	0.112463523350795	-2.41433063694005
Q8IX15-3	HOMEZ	0.162660396687153	3.32604094396164	3.72284050683341	0.0107810337805936	0.116103729768303	-2.41522551428565
Q9UPY3	DICER1	-0.0549807398844297	3.32858236643665	-3.94603645749106	0.00839310765868778	0.106312965471502	-2.42249399005655
O43829	ZBTB14; ZFP161	0.193883038719398	3.30068375829906	3.6945447534469	0.0111348485406227	0.117344173081947	-2.42505280175958
O95782	AP2A1	0.0672246659502557	3.38862383326812	3.96412173097965	0.00822730038386539	0.105127532836146	-2.42545956459262
P62873	GNB1	0.115276170899471	3.36604665348389	3.69606745037321	0.0111154810647536	0.117301197701224	-2.42873213830033
Q9HC36	RNMTL1; MRM3	0.166071611036309	3.39125428687033	3.62688145227969	0.0120347890145801	0.120379271603466	-2.43101340970761
O75475-1	PSIP1	0.117477606386636	3.42673863080463	3.90547889166276	0.00877878801257557	0.107761378611968	-2.43436624134585
Q9NP79	VTA1	-0.113155667941958	3.26534059436241	-3.72798690969116	0.0107180443332841	0.115815262147825	-2.43941722752898
Q5VW32	BROX	-0.118821826702102	3.19427258569301	-3.59720245511048	0.012454937435718	0.122662747120447	-2.44781022485777
P82933	MRPS9	0.142604309254521	3.40993295311258	3.70237852265134	0.0110356101586478	0.116868684573892	-2.45115718915188
P55072	VCP	-0.0543243448056628	3.27971788901223	-4.41781906704996	0.00506804188053903	0.0919196626654739	-2.45186804111736
O43149	ZZEF1	-0.0724181138360838	3.18318125775195	-3.7961584928541	0.00992140680783132	0.112463523350795	-2.45523200263827
P50453	SERPINB9	-0.11236912285175	3.35009808291733	-3.59728127108767	0.0124538002210053	0.122662747120447	-2.45741229110803
Q12756-2	KIF1A	-0.0925151787897957	3.35207703348041	-4.03149008722416	0.00764132049364847	0.102311013660159	-2.45745242158776
O75436-1	VPS26A	-0.0942197975929461	3.21203245102471	-3.68783135664662	0.0112206888528272	0.117763508726252	-2.45815969689458
Q9NUP9	LIN7C	0.123493657066152	3.38672388358218	3.5888036067488	0.0125767889339362	0.122851393877235	-2.46074543679548
P49759-3	CLK1	0.166198763845128	3.35604965078886	3.61008672748668	0.0122705634261478	0.121784945155765	-2.46133049803721
P06744-2	GPI	-0.110242196548006	3.18182682947745	-4.17958562640329	0.00651137859063592	0.0976466481348418	-2.46207029778139
O00566	MPHOSPH10	0.106985820951805	3.39147100983272	3.78770741995117	0.0100164647921586	0.113282453963024	-2.46521218898907
P55265-4	ADAR	0.119125257114539	3.36067573177219	3.5796213138342	0.0127115309879074	0.122915332632965	-2.46653791496447
Q7LBC6-1	KDM3B	-0.0705545947398088	3.35489801924846	-4.13287038465108	0.00684605511340335	0.0990998770377935	-2.46680791343845
Q8NFU7	TET1	0.121596167759334	3.4413047702864	3.73598110205045	0.0106210148561091	0.115545461550528	-2.46758259103578
Q13686	ALKBH1	0.159765968122945	3.30125352827766	3.57772825626806	0.0127395097080565	0.122915332632965	-2.46793046338077
P62760	VSNL1	-0.115111085074379	3.43620442444989	-3.63815773068581	0.0118793257417259	0.120088056645234	-2.46845035744755
Q9Y5J6	FXC1; TIMM10B	0.199010917219658	3.29580911282087	3.62041840431297	0.0121249171149022	0.120808265072117	-2.46889859074067
Q9Y4G8	RAPGEF2	0.0977180899553812	3.3846208518836	3.63501029432928	0.0119224917856507	0.120088056645234	-2.47541257681093
Q13416	ORC2	-0.107908641272555	3.33173013977302	-3.69276170959139	0.011157575421542	0.117369903389324	-2.47566079738594
Q9UKL3	CASP8AP2	0.134373086848886	3.39619842766727	3.62948118793771	0.011998746552462	0.120175435444502	-2.47641895427792
P62269	RPS18	-0.138688831257482	3.32219734714989	-3.97568748908446	0.0081231981218872	0.104566887318892	-2.47657406184171
Q96K58-2	ZNF668	0.209047135521162	3.41407485409869	3.71596713050692	0.0108658078693485	0.116103729768303	-2.47796003528377
P26440	IVD	0.193207804721319	3.4004155475185	3.77892647391088	0.0101163163456064	0.11363452269911	-2.48320022788929
Q9NVP1	DDX18	0.114726219115583	3.40813756393863	4.25334418637752	0.00601992553781282	0.094748506093388	-2.48943348973669
Q99417	MYCBP	-0.12350357372154	3.30235074195735	-3.55409133522959	0.0130946990446647	0.123904056469314	-2.49605225158638
Q96JP5-1	ZFP91	-0.308391409544516	3.30609763652125	-3.69195404705662	0.011167887053468	0.117369903389324	-2.49952036495175
Q06730-3	ZNF33A	0.573221773353565	3.42090833118482	6.10850865732843	0.00106244654932755	0.0642434834743067	-2.50018397103225
P62879	GNB2	0.145290510424218	3.31100943565842	3.55568482807149	0.0130704098048919	0.123904056469314	-2.50025705372209
Q8WY54	PPM1E	-0.0979412531626298	3.18552751425223	-3.55817969960998	0.0130324818675566	0.123904056469314	-2.5022909005985
P21359-1	NF1	-0.0606536470942764	3.30310254274386	-3.8128150646408	0.00973700047942869	0.112463523350795	-2.50241864626662
Q9H2P9-5	DPH5	-0.112831243107734	3.35235172737804	-3.56922458613425	0.0128660410710088	0.123077639771545	-2.50693113474557
Q96RS6	NUDCD1	-0.0844109581379958	3.34014546633363	-3.80581587248115	0.0098140167033161	0.112463523350795	-2.50890797024445
Q9H4L5	OSBPL3	-0.102858163451111	3.20834159606229	-3.58271638237815	0.0126659344905972	0.122895454415541	-2.51023740477425
P00492	HPRT1	-0.123979167782166	3.09457545701645	-3.62529791704888	0.0120568022300115	0.120442430610219	-2.51071050439655
Q9NRR5-1	UBQLN4	0.120745524823539	3.29751972573658	3.65138246463936	0.0116998512073225	0.120088056645234	-2.511025896363
Q96H22-3	CENPN	0.141105500863146	3.29919658808943	3.55277363864152	0.0131148223950137	0.12391245987013	-2.51664983126914
Q96SI9	STRBP	0.107467737090837	3.38972960611555	3.87936358272236	0.00903766454384765	0.107948763898979	-2.51859949565266
Q9HAB8-1	PPCS	-0.123594494256443	3.05777034503763	-3.53645256145384	0.0133669498258528	0.125062486663345	-2.51889809580692
O60610-1	DIAPH1	-0.103497990861355	3.31789660241117	-4.00551062946396	0.00786153798901542	0.103454064239668	-2.52138217244319
Q96EB6	SIRT1	-0.103396237024641	3.34996952739079	-3.67224054076955	0.0114229096055793	0.11842778715406	-2.5237626563531
Q99666	RGPD6; RGPD5	0.117117703690653	3.39966248011654	3.55643947754221	0.0130589243864765	0.123904056469314	-2.52500178859165
Q13425-1	SNTB2	0.109367855373598	3.29534996040785	3.53540860137832	0.0133832597278381	0.125062568370248	-2.52763004498425
P42285	SKIV2L2	0.0524131244116769	3.38265738451952	4.1479622482477	0.00673585477872243	0.098356578144959	-2.52939779476152
Q2M2I8-1	AAK1	-0.0769389892947066	3.30865968234033	-3.67506537054246	0.0113859698081071	0.11842778715406	-2.53146724613547
Q8IXQ5	KLHL7	0.0938668032978035	3.42200398077497	3.58598527668391	0.0126179752079279	0.122851393877235	-2.53367872785865
P26373-1	RPL13	-0.0742739084263688	3.34569939243968	-3.83106444744862	0.00953936110623009	0.111056112908949	-2.53766723064417
Q9NPF4	OSGEP	-0.12547765244997	3.2151592705906	-3.50805936256651	0.0138185382166626	0.126924544141408	-2.53912411256383
Q9H0A0	NAT10	0.114690554286149	3.38772140314538	3.99251556965518	0.00797436816235414	0.103966362729963	-2.54322013221308
O95396	MOCS3	-0.122648804042045	3.24892360927964	-3.50685940953736	0.0138379939367567	0.126924544141408	-2.55002611760176
O00487	PSMD14	-0.0988390628570067	3.33446864646168	-3.7176641122409	0.0108448086665261	0.116103729768303	-2.55082721823177
Q9UBT2	UBA2	-0.0935343004125471	3.26777391086921	-3.89118061870963	0.00891947639618439	0.107948763898979	-2.55125208457961
O43791	SPOP	0.146089236543017	3.29442931945215	3.50829254274008	0.0138147610299965	0.126924544141408	-2.55361194480153
Q9Y6X4-1	FAM169A	0.0797340923825172	3.37286587629145	3.65357692285137	0.0116703640465543	0.120020151427835	-2.55400419756599
Q9NR28-1	DIABLO	0.0930336464571331	3.37065870664222	3.52587590571276	0.013533219880984	0.125955398364598	-2.55938640025405
Q8WUQ7-2	CACTIN	0.0940819586442423	3.3732707011452	3.62982542487341	0.0119939831328655	0.120175435444502	-2.56004792861094
O95453	PARN	0.073845546645878	3.38612974778077	3.70525815468024	0.0109993799738309	0.116718178643472	-2.56200307978238
Q8IYN2	TCEAL8	-0.157572979482432	3.45638778420868	-3.53658716654229	0.0133648484881098	0.125062486663345	-2.56392529681697
Q9H3C7	GGNBP2	0.126233449566779	3.32054914119572	3.48056085884565	0.0142721417869398	0.128860838568137	-2.56837351797464
Q96A35	MRPL24	0.144894801865784	3.36605456191857	3.50425635817514	0.0138803040321482	0.126924544141408	-2.56904537899806
Q9NZB8	MOCS1	0.228653443138673	3.44616535570544	3.52185360384279	0.0135970559841305	0.126291299649213	-2.57067321822419
Q9H967	WDR76	0.129194434192218	3.26785230296282	3.54300533675529	0.0132650794799087	0.124717757070906	-2.57195052843888
P41250	GARS	-0.0649627039612788	3.31525606659328	-3.8563679453642	0.00927273309467376	0.108943963709551	-2.57277512292734
Q5MIZ7-1	SMEK2; PPP4R3B	-0.142125128489518	3.33000837237415	-3.47575793916773	0.0143530558467739	0.128860838568137	-2.57926443975395
Q53S33	BOLA3	0.144775443806753	3.33379592542876	3.51214682903967	0.0137524933112985	0.126924544141408	-2.57983495076869
P29279-1	CTGF	0.135973659321612	3.4462473001603	3.46592029700882	0.0145203867283017	0.128860838568137	-2.58182349146899
Q9NW64-1	RBM22	0.125522359557493	3.37131102896024	3.57071966648186	0.0128436936687235	0.123017250719659	-2.58193199241008
Q13435	SF3B2	0.0542401192187175	3.34477136277562	4.07812751050734	0.00726321503662324	0.100336782919892	-2.58302901799163
O60885-1	BRD4	0.0680685219886305	3.34761665953496	3.79895081153454	0.00989022137683857	0.112463523350795	-2.58385191408545
Q9GZR2-1	REXO4	0.129623749615544	3.37771959740271	3.51728023544677	0.0136700455461374	0.126662547620732	-2.5871180387595
Q9HCK8-1	CHD8	-0.0943909116805479	3.31549725967604	-3.88431136762487	0.00898796641539846	0.107948763898979	-2.59074702800011
Q9Y3B6	EMC9	0.233609361495056	3.3419090304085	3.59555690910736	0.0124787070673831	0.122739282847389	-2.59188109736014
Q14684	RRP1B	0.107179651877241	3.40383342511683	3.93131091504008	0.00853089215203668	0.106768359853875	-2.59520223835032
Q15398	DLGAP5	-0.089921479116191	3.35735322181825	-3.78687256036805	0.0100259106153407	0.113282453963024	-2.59576921224019
Q07666	KHDRBS1	0.103211347420801	3.34397933421531	3.71853218681795	0.0108340842927556	0.116103729768303	-2.59701696686322
O60678	PRMT3	-0.0738923974737939	3.30188905998973	-3.63677400194287	0.0118982815791842	0.120088056645234	-2.59903897654575
P62841	RPS15	-0.0595524095467543	3.33652647447818	-3.80846171887989	0.00978482285088546	0.112463523350795	-2.60264788887049
Q96AC1-3	FERMT2	-0.0982232841187965	3.37730976493936	-3.75169467876596	0.0104331452083627	0.11469765848634	-2.60693565078368
P04181-1	OAT	0.141264610681413	3.40465476953722	3.63275980936182	0.0119534638712847	0.120088056645234	-2.61029519983979
P57772	EEFSEC	-0.0793071466433183	3.24607613817451	-3.55531428147623	0.0130760534755771	0.123904056469314	-2.61236835402729
Q9BWT1-2	CDCA7	0.113986171843943	3.45734840306622	3.45053038246074	0.0147865256313293	0.128968217412804	-2.61692103565067
Q15072	ZNF146	0.21814275927462	3.37850409318845	3.43791870174404	0.0150086650063188	0.128968217412804	-2.61746196342538
Q96TA1	FAM129B	-0.0782099763467267	3.37060756629424	-3.63653971984218	0.0119014943766685	0.120088056645234	-2.61859381818776
Q9BQG0-2	MYBBP1A	0.102879384640884	3.4033925885081	4.11338814255025	0.00699133635990474	0.100213355865563	-2.61938965950673
P53384	NUBP1	-0.130871393666222	3.25272763921067	-3.43415266291145	0.0150757162650719	0.128968217412804	-2.62270326215003
Q96L58	B3GALT6	0.150105641265626	3.2681607935953	3.42535731858196	0.0152336100210902	0.128968217412804	-2.62299899597948
Q9UHB6-4	LIMA1	0.102005423280172	3.35240399525516	3.79880779362201	0.00989181596898788	0.112463523350795	-2.6236158581737
O43824	GTPBP6	0.159350505498724	3.41713284754414	3.46197820954328	0.0145880465098213	0.128968217412804	-2.62465879335509
Q9BSH4	TACO1	0.154013476687537	3.29890695424419	3.43065896071435	0.0151382164407162	0.128968217412804	-2.62526460788133
Q8WWC4	C2orf47; MAIP1	0.139691230286573	3.37811427664137	3.42485542966196	0.0152426751524559	0.128968217412804	-2.62574916942004
Q9P2E9-1	RRBP1	0.0830838907710103	3.36566209223698	4.09829751668401	0.0071062623494535	0.10029178526272	-2.62875060716584
Q9BVP2	GNL3	0.0818234381094616	3.33949903446848	3.75741022125658	0.0103657364640416	0.1146208268587	-2.63288385301456
Q6I9Y2	THOC7	0.0980219931731704	3.34338572718097	3.54820814436093	0.0131848119154908	0.12435713911429	-2.63561372389742
O76031	CLPX	0.123620262007723	3.40907761928031	3.74990378206613	0.0104543678712329	0.114700701336071	-2.63649371769472
Q8N8A6	DDX51	0.101919086706869	3.35524517617602	3.63327628786127	0.0119463479468108	0.120088056645234	-2.63772542640721
P01130	LDLR	0.0906131525571107	3.42898552092457	3.45375232705049	0.0147303626438567	0.128968217412804	-2.64069364877518
Q8WUZ0-2	BCL7C	0.156899326210788	3.35894561599592	3.42601374826119	0.0152217626057654	0.128968217412804	-2.64195107114953
Q15257-1	PPP2R4; PTPA	-0.13092795987028	3.2812868920925	-3.50910356127328	0.0138016326333557	0.126924544141408	-2.64705130563367
Q08945	SSRP1	-0.0435815168103186	3.31386454639739	-3.92495054803181	0.0085911904134313	0.106999371512735	-2.64778595420555
Q9P1Y6-1	PHRF1	0.0780488493515128	3.36195796150667	3.48890599273043	0.0141327565540388	0.128163721374215	-2.64868961414115
Q15477	SKIV2L	-0.124708427165801	3.28999277032798	-3.64691724766695	0.0117601082063223	0.120088056645234	-2.64941808154217
O43768-4	ENSA	-0.226872569812258	3.27946444140059	-3.39768234802063	0.0157425332885985	0.13042841834787	-2.65136551905335
O15075-1	DCLK1	-0.105569257517693	3.38389188603258	-3.4406932258766	0.014959478815437	0.128968217412804	-2.65152616475959
Q8TB52	FBXO30	-0.0763615560356097	3.32495281791398	-3.60682098197723	0.0123170063191276	0.121987937943905	-2.6515384327121
Q969Z0-1	TBRG4	0.143693790567769	3.42043832959291	3.67462448649802	0.0113917263634712	0.11842778715406	-2.65215948819361
Q9Y5J9	TIMM8B	0.368807874767299	3.31269852387033	3.42613699897279	0.0152195392857781	0.128968217412804	-2.6540847857155
O43159	RRP8	0.130062833665061	3.32308306904784	3.60641335852638	0.012322816984688	0.121987937943905	-2.6565436125698
P10809	HSPD1	0.173909279941588	3.40810903847762	4.65040834702262	0.0039995231384006	0.0872940006618409	-2.65661102344341
P46109	CRKL	-0.0947860003844712	3.24962175734865	-3.59073937108578	0.0125485871190309	0.122851393877235	-2.6590334892008
Q15435	PPP1R7	-0.0804485431758454	3.26067690811768	-3.58487636128021	0.0126342218155811	0.122851393877235	-2.65979336462176
Q14C86-6	GAPVD1	-0.0702644394994615	3.21440660759087	-3.77099968603484	0.0102074140035418	0.113831335427791	-2.66091061442967
Q9NVE7	PANK4	-0.0762279933020716	3.25374552999028	-3.55388926021458	0.0130977828202052	0.123904056469314	-2.66202428743538
Q15003	NCAPH	-0.0695338854350891	3.321762940505	-3.65770431696999	0.0116151285705633	0.119773207517959	-2.66621392336786
Q15269	PWP2; LOC102724159	0.111830783993548	3.38231334407734	3.57119665421131	0.0128365731044869	0.123017250719659	-2.66624750755163
O15392	BIRC5	0.127576685011101	3.42589491375435	3.47123110304222	0.0144297860729628	0.128860838568137	-2.6719582136578
Q9UK41-1	VPS28	-0.132826355826257	3.23901542015442	-3.37721277313894	0.0161310948455692	0.132078718948993	-2.67255420296988
Q9Y5S9	RBM8A; LOC101060541	0.1303724636916	3.31297507090435	3.46118884935689	0.0146016367256941	0.128968217412804	-2.6740803954506
Q16659	MAPK6	-0.144408801380614	3.38247032264548	-3.37751822260977	0.0161252190762519	0.132078718948993	-2.67475754137262
Q9NWS0-1	PIH1D1	-0.0885895542605082	3.3083984121842	-3.48328065430559	0.0142265469077587	0.128860838568137	-2.67497871191317
O94874-1	UFL1	0.0754429432576452	3.26370446916044	3.74771737670347	0.0104803430183246	0.114700701336071	-2.67562426332218
Q6P0N0	MIS18BP1	0.11882746573176	3.4366077076155	3.64342719641084	0.011807447065818	0.120088056645234	-2.68436324645051
Q96SZ4-1	ZSCAN10	0.363173149624827	3.47464124021483	3.47216829760611	0.0144138631811747	0.128860838568137	-2.68621729257717
Q8IY81	FTSJ3	0.124651949320146	3.37635531287656	3.77632356756416	0.0101461290568658	0.113636645436897	-2.68783494648066
Q9NZT2-1	OGFR	-0.101631090964762	3.17867013940308	-3.37912542367627	0.0160943412771204	0.132078718948993	-2.68982959670559
O60292	SIPA1L3	0.105418754271199	3.39940057480672	3.55541440087629	0.0130745283228559	0.123904056469314	-2.69167099233868
Q14232	EIF2B1	-0.0731607354401917	3.25221374353295	-3.4805138488248	0.0142729312946658	0.128860838568137	-2.69291233343291
Q9Y281-1	CFL2	-0.104952666005194	2.9732379319832	-3.43200147145588	0.0151141657657102	0.128968217412804	-2.69296911360617
Q8IWX8	CHERP	0.0663807552988623	3.36695803103097	3.63625532667859	0.0119053956680683	0.120088056645234	-2.69327725608987
O60701	UGDH	-0.0841322407232838	3.37175312362829	-3.6733638753408	0.0114082039336551	0.11842778715406	-2.69347866021452
P62829	RPL23	-0.0831072748600821	3.34883725860244	-3.75180974065499	0.0104317833414121	0.11469765848634	-2.69583760327116
P40692-1	MLH1	-0.0964706390326443	3.40313138631715	-3.57682076901682	0.0127529463993535	0.122915332632965	-2.69611851994896
Q96DB5	FAM82B; RMDN1	0.0888387844521457	3.34129531795878	3.40749673132082	0.0155599251099223	0.130174120735159	-2.69682841333398
Q9P2R3-2	ANKFY1	-0.0660561582149534	3.26172922634179	-3.64214966010368	0.0118248286992007	0.120088056645234	-2.69739731985821
Q96FH0-1	MEF2BNB; BORCS8	0.179219431095841	3.12846242558867	3.46738070276577	0.0144954097765134	0.128860838568137	-2.69844392007582
P52564-1	MAP2K6	-0.105218714063753	3.28534043770761	-3.43131283934244	0.0151264970961954	0.128968217412804	-2.69909599825369
Q9H857-2	NT5DC2	0.157717904367216	3.43465190869824	3.40609232937878	0.015585910934561	0.130174120735159	-2.70343753630994
Q9NYY8	FASTKD2	0.136362185466101	3.4653741975824	3.53244646787878	0.0134296582930834	0.125343477402112	-2.70415696139621
Q16649	NFIL3	0.165754513173914	3.19201002596061	3.39900007835105	0.0157178777024477	0.130390693619976	-2.70433726439591
O14562	UBFD1	-0.104033630398834	3.30651968085945	-3.45593146321326	0.0146925116867892	0.128968217412804	-2.70469300211549
P50897	PPT1	0.108876186942437	3.40728497496089	3.42417719247911	0.0152549350105944	0.128968217412804	-2.70585308194036
Q99436	PSMB7	-0.110780896064445	3.32215581222989	-3.43482928547957	0.0150636450674912	0.128968217412804	-2.7083992983221
Q9H4L4	SENP3	0.0829754256837994	3.37084766614184	3.5867723673256	0.0126064577652813	0.122851393877235	-2.70859425597724
P84085	ARF5	-0.0921681667339466	3.23384396316988	-3.43243487731792	0.0151064104956709	0.128968217412804	-2.70870983819136
Q9NZD8	SPG21	-0.105384415316378	3.12035292805885	-3.35652342382682	0.0165346658464163	0.134259031570179	-2.7103549734316
Q6AHZ1-1	ZNF518A	0.112113447662676	3.38574025278783	3.35665840143816	0.0165319969426356	0.134259031570179	-2.71243069281913
Q15006	EMC2	0.0862262274752006	3.32617960306088	3.41496442479692	0.0154225547017326	0.129881272965634	-2.71616250645384
O75792	RNASEH2A	-0.0893635272269373	3.2591439087912	-3.372381883018	0.0162243405296411	0.132687029354723	-2.71639782333527
Q16401	PSMD5	-0.119638518302922	3.25149317179287	-3.35048910144328	0.016654471343162	0.134364541255783	-2.71922894661192
Q66K74	MAP1S	-0.0881925545179858	3.36522068226501	-3.57567230999844	0.0127699736997507	0.122925016592832	-2.71981055055782
Q8WXE9-3	STON2	0.11870489550459	3.30642664623984	3.33651475892824	0.0169356278661819	0.135626447796813	-2.72000954515614
O75170-5	PPP6R2	-0.072059914914199	3.2073086988044	-3.47045953347497	0.0144429096859971	0.128860838568137	-2.72024181005479
Q13442	PDAP1	-0.110747096285437	3.31228851187682	-3.4486140259588	0.0148200432500064	0.128968217412804	-2.72450256127726
P22059	OSBP	-0.0959607208976924	3.28007246245896	-3.57283310193678	0.0128121773398179	0.123017250719659	-2.72687966933019
Q8WYA6	CTNNBL1	0.0598734648387199	3.34829266614881	3.72987748314298	0.0106950082142069	0.115729341353167	-2.73004643970107
Q8NB46	ANKRD52	-0.105032788079284	3.16589515939709	-3.33086537342382	0.0170507794942004	0.135839647226901	-2.73010733713901
Q96C01	FAM136A	0.138386261180456	3.38428346374564	3.53943846146819	0.0133204229064737	0.125062486663345	-2.73054872048094
Q12769	NUP160	0.0985300320627963	3.36261221225713	3.68127769826208	0.0113052012816093	0.118063696510838	-2.73401018207735
Q99497	PARK7	-0.0998523802528913	3.24924523470085	-3.78110538781367	0.0100914353796764	0.113521249608325	-2.734081017058
P05091	ALDH2	0.156694421494957	3.32936159965359	3.58542888073391	0.0126261239935663	0.122851393877235	-2.73570366915004
O75533-1	SF3B1	0.0475154498097674	3.35580933312071	4.07187422301166	0.00731266626858164	0.100362747070766	-2.73716305612603
Q969S9	GFM2	0.138806129199088	3.22693614324568	3.43910099345596	0.0149876836470725	0.128968217412804	-2.73819528956253
Q9Y2F5	KIAA0947; ICE1	0.08426157802023	3.41875001218648	3.48936762505316	0.0141250904303152	0.128163721374215	-2.7389259341163
Q9NPH2	ISYNA1	-0.139714839348064	3.39192669658946	-3.53755891882583	0.0133496892503227	0.125062486663345	-2.7390462429253
P17987	TCP1	-0.0647537245284739	3.3099162865858	-4.045332179844	0.00752683076713888	0.101665221206848	-2.7423863655011
Q16537	PPP2R5E	-0.104337527385252	3.36746152380787	-3.39117201191517	0.0158649773394243	0.130740474007642	-2.74301589192851
Q53FA7-1	TP53I3	-0.106791721046419	3.35470788727744	-3.41815359573434	0.0153642996951338	0.129532865122051	-2.74325071761845
Q96DY7	MTBP	0.0954913067241788	3.35408569867505	3.37866227532475	0.0161032326252999	0.132078718948993	-2.7443574710362
P42345	MTOR	-0.0498755409310827	3.28102462722377	-3.66826509957245	0.0114751229414084	0.118808560332638	-2.74963351966324
P08473	MME	0.119077233410763	3.43414253356535	3.45029978442832	0.0147905543938702	0.128968217412804	-2.75222034257634
O75564	JRK	0.181045281590226	3.38136553080958	3.47061615218892	0.0144402446877447	0.128860838568137	-2.75342984517177
Q9UBQ5	EIF3K	-0.0895841257034641	3.32745412464042	-3.4533801211452	0.0147368385828206	0.128968217412804	-2.75393801940234
Q8N3R9-1	MPP5	0.12366392215074	3.36115673284157	3.41174343463109	0.0154816399522975	0.130174120735159	-2.75979529838404
Q15120-2	PDK3	0.153595020261035	3.44308888640277	3.40243783859048	0.0156537564696414	0.130255552749554	-2.762062983573
Q1ED39	C16orf88; KNOP1	0.118819200578902	3.43198968504508	3.770946890563	0.0102080238235558	0.113831335427791	-2.76317221461163
O75879	PET112; GATB	0.144013790375316	3.36991582191267	3.31059881757937	0.0174710624832797	0.137193440503297	-2.76390350973772
Q9Y2H0	DLGAP4	-0.0967140802514115	3.3523186130563	-3.39883391807418	0.0157209843063709	0.130390693619976	-2.76450339703464
P51687	SUOX	0.12367826642598	3.37828109968675	3.2938081413917	0.0178279550051839	0.138651579999506	-2.76460377008352
Q96KP4	CNDP2	-0.089446420144481	3.28219771632904	-3.64566494584389	0.0117770699197388	0.120088056645234	-2.76490952605754
Q8NEB9	PIK3C3	-0.0730368641958426	3.32236707769555	-3.49812050109006	0.0139806074046015	0.127386247040502	-2.76491691653133
P34897-1	SHMT2	0.162578301421103	3.38090982384978	3.76852558268156	0.0102360353383368	0.113880765214957	-2.7664087944019
Q7Z3K6-2	MIER3	-0.102617166799824	3.30653394106737	-3.29448282270123	0.017813459857257	0.138651579999506	-2.76957495856191
P54274-1	TERF1	0.0997510229976187	3.42392986385086	3.42867216957759	0.0151738872487647	0.128968217412804	-2.77026506810103
Q9BXA9-2	SALL3	0.138700689677434	3.4284939651254	3.32572145012154	0.0171563827370293	0.136153306526024	-2.77456427491815
Q14435	GALNT3	0.172081126097942	3.1808776730001	3.30371067710599	0.0176165075178015	0.137912087425075	-2.77689616213021
Q6PD62	CTR9	0.0564068651538951	3.33869345129228	3.71246144143291	0.0109093331008259	0.116185616407132	-2.77699150704834
O60437	PPL	-0.0687621373623264	3.46172568670095	-3.44939274179839	0.0148064131151422	0.128968217412804	-2.77776916817658
Q27J81	INF2	-0.123501139947133	3.34218563933595	-3.35512462430853	0.016562352353059	0.134259031570179	-2.77809070957068
Q8N3X1-2	FNBP4	0.0681347308313999	3.30138869707915	3.42683560906839	0.0152069438699645	0.128968217412804	-2.78024051809952
P27144	AK4; LOC100507855	0.165384638454689	3.4524252134383	3.45078287054335	0.0147821158279682	0.128968217412804	-2.78539075404804
Q9BWH6	RPAP1	-0.0771455953659785	3.35363613000431	-3.52516526045704	0.0135444738856612	0.125955398364598	-2.7867543203268
Q05D32	CTDSPL2	0.128340524895011	3.35623556293481	3.32549066820655	0.0171611375665622	0.136153306526024	-2.78695049848031
O14802	POLR3A	-0.052901580218702	3.30697521514613	-3.72101918919379	0.0108034250175825	0.116103729768303	-2.78810062540494
O15355	PPM1G	-0.114178301963336	3.33061843772872	-3.60379080103565	0.0123602747508447	0.122201066866598	-2.79607218916091
Q8TCS8	PNPT1	0.122989690805707	3.31817086554702	3.57704677346608	0.0127495985916128	0.122915332632965	-2.79657720726208
Q9UN37	VPS4A	-0.0973441856329139	3.29007571046705	-3.39114941148703	0.0158654042363289	0.130740474007642	-2.79684745187584
O43592	XPOT	-0.120176996649985	3.28744729516996	-3.4766848626366	0.014337400457402	0.128860838568137	-2.79850493861084
Q9UKX7	NUP50	0.100552649547837	3.4113246834142	3.80251322350369	0.00985059479368627	0.112463523350795	-2.80277811679382
P02792	FTL	0.0868443772079344	3.3960847628948	3.31794560380341	0.017317395887058	0.136847534958793	-2.81146096315675
Q8N5M1	ATPAF2	0.194738939386965	3.28494479469676	3.24750858088961	0.0188545301317857	0.1422866960775	-2.81208361808004
Q9NQX4	MYO5C	0.0855167099138885	3.40689590112282	3.40720903808868	0.0155652444146799	0.130174120735159	-2.81787448281972
P78344-1	EIF4G2	-0.0524463591595541	3.33732405529438	-3.87879942887539	0.00904335078142743	0.107948763898979	-2.81984408368893
Q9H1P3-1	OSBPL2	-0.102688047018205	3.29228111609539	-3.26125283593883	0.0185431281079716	0.141414392489422	-2.82112620133177
O75935	DCTN3	-0.122781147653568	3.26334324024095	-3.2324104864409	0.0192032777832449	0.142728484407685	-2.82144386623255
O75431	MTX2	0.116988402440502	3.33537926142263	3.31208730184158	0.0174398076110558	0.137193440503297	-2.82181616587894
P54277	PMS1	-0.0818452564803832	3.39179246552971	-3.50483988190808	0.0138708069076037	0.126924544141408	-2.82358638445716
P82909	MRPS36	0.179332112105718	3.41367025406029	3.22397088025482	0.0194013205726405	0.142728484407685	-2.83042085788731
O94925-3	GLS	0.168636784034829	3.39847462521379	3.22361406587011	0.0194097430479258	0.142728484407685	-2.83238366670895
Q9ULL8-1	SHROOM4	0.215784795775605	3.40743664241888	3.50722342178448	0.0138320887184362	0.126924544141408	-2.83441565039184
Q8IX21	FAM178A; SLF2	0.194989829848184	3.33052079102742	3.2208346955685	0.0194754873476597	0.142728484407685	-2.83711962880748
Q9H116	GZF1	-0.205564232557143	3.43218960009363	-3.37157468601106	0.0162399792184678	0.132687029354723	-2.83775687272465
Q9H0D6-1	XRN2	0.050333369623145	3.36332586194213	3.72146105411108	0.0107979879613441	0.116103729768303	-2.83833806652757
P52701	MSH6	-0.101435940174445	3.36418218629365	-3.89376847690627	0.00889382635069673	0.107948763898979	-2.83881201152138
Q8N141	ZFP82	0.163705971986969	3.44111782460846	3.29149231589169	0.0178778085330848	0.138824440350027	-2.8390677633223
Q93034	CUL5	-0.0752973749778273	3.2329524621122	-3.35461861548034	0.0165723804610218	0.134259031570179	-2.84093893137189
Q14207	NPAT	0.113808202587573	3.39862676241305	3.40385672050003	0.0156273761111986	0.13017723075474	-2.84173037382448
Q96BX8	MOB3A	-0.200684716118458	2.33253474389083	-3.22516487616983	0.0193731660386195	0.142728484407685	-2.843081053482
Q8NCN5	PDPR	0.154225527068165	3.43426856515989	3.3988460475065	0.0157207575062408	0.130390693619976	-2.84374978909348
Q68CQ4	DIEXF	0.0749351921113389	3.35187497432302	3.45749046271711	0.0146654986642761	0.128968217412804	-2.8452678770591
Q4LE39-1	ARID4B	0.054838317970477	3.26980102437947	3.54653586886228	0.0132105521654143	0.124357492285961	-2.84607341459121
Q9H299	SH3BGRL3	-0.16171110107891	3.2145576967628	-3.27110004308988	0.0183235152153166	0.140487257330937	-2.84693666746549
Q9ULR0-1	ISY1-RAB43; RAB43; ISY1	0.0944096564918211	3.34313497953458	3.27119025392972	0.0183215166608196	0.140487257330937	-2.84922529329059
Q96B97-1	SH3KBP1	-0.101688571058464	3.03379758029654	-3.24454597740485	0.0189224074434772	0.142465858593088	-2.85034484683795
Q9Y6G9	DYNC1LI1	-0.0562283069455933	3.31901590026603	-3.61906029226998	0.0121439518606976	0.12084098401462	-2.85074075287451
Q5TZA2	CROCC	0.0855095821426567	3.44750983535861	3.58508898949827	0.0126311048134968	0.122851393877235	-2.85169540354145
Q14592	ZNF460	0.168116651992894	3.40049558261256	3.20399761426146	0.0198790474531388	0.14387929439668	-2.85261624637985
Q6IN84-1	MRM1	0.241167783782073	3.46097775009455	3.20280502152327	0.0199079799298723	0.143952895402432	-2.85282240272434
Q5T2T1	MPP7	0.0970334433785987	3.36731719528899	3.22665699587583	0.0193380450695387	0.142728484407685	-2.85331336886621
O60869-1	EDF1	-0.110846199483228	3.3377228092893	-3.34334186090433	0.0167976186561938	0.135369044464621	-2.85553363047587
Q14004-1	CDK13	0.0787218710628049	3.3851622989193	3.44448056928721	0.0148926264317866	0.128968217412804	-2.85771676299016
Q9GZN1	ACTR6	0.104804001352577	3.2905939571573	3.2119027137958	0.0196884367510833	0.143175058534892	-2.85971500506416
Q9NZM4	GLTSCR1; BICRA	0.077626520985582	3.37933997590397	3.27777550449916	0.0181762739308497	0.140008407226385	-2.86162651708634
O75643-1	SNRNP200	0.0728533765219937	3.35094341101291	4.14497576032743	0.00675750207143658	0.0983748688653917	-2.86428414143925
Q92830-1	KAT2A	0.10142237613404	3.33075370935356	3.23276420286707	0.0191950263664706	0.142728484407685	-2.86501489899373
Q7Z3B3	KANSL1	0.118094296404984	3.38987616039103	3.30516612998041	0.017585663942105	0.137811250014127	-2.86599963278078
Q13769	THOC5	0.103666985402044	3.35702955692929	3.54759095300453	0.0131943054274025	0.12435713911429	-2.86643577383047
Q16836-2	HADH	0.157356666788637	3.33978540594303	3.40479085246001	0.0156100353332046	0.130174120735159	-2.86945805230956
Q04760-1	GLO1	-0.0805675645739892	3.14426631691003	-3.33343532910811	0.0169982888442325	0.135819641297102	-2.86973511797771
Q99755-3	PIP5K1A	0.100180793243848	3.38443454344033	3.34224153011343	0.0168197772788017	0.135405384347289	-2.87280888220447
Q9Y5Z4-1	HEBP2	-0.128212353465933	3.2075766400692	-3.18846898860547	0.0202594310310287	0.145126381764755	-2.87406338276216
Q9BZD4	NUF2	-0.107064143469427	3.29792182005987	-3.32619089299187	0.0171467152454635	0.136153306526024	-2.87707375247212
P20674	COX5A	0.136026254359976	3.36066389333701	3.2140447508052	0.019637134861925	0.143048275776644	-2.88004214490663
P22570-7	FDXR	0.157448032391598	3.35146341612522	3.18949758535505	0.0202339883409786	0.145126381764755	-2.88006478678612
P53611	RABGGTB	-0.138786425894989	3.24817257730875	-3.18270528977868	0.0204026518705415	0.14576415422845	-2.88112650553029
Q8IWL3	HSCB	0.157340078965901	3.31038336883413	3.17558755343189	0.0205810602917221	0.146188927758839	-2.88199626459581
Q5T0F9-2	CC2D1B	-0.10967256201938	3.17567425454038	-3.2251473469813	0.0193735790523057	0.142728484407685	-2.88392105697293
P39748	FEN1	-0.0834478235199499	3.18776261458902	-3.46543149826981	0.0145287572160373	0.128860838568137	-2.88408480697879
Q3YEC7-1	RABL6	-0.135078418353238	3.28828752040399	-3.31829539472261	0.017310117000106	0.136847534958793	-2.88423349536405
Q8TDZ2-4	MICAL1	-0.0861988277595468	3.24533845441409	-3.31673621746722	0.0173425884281045	0.136885121831705	-2.88607333105667
P04062	GBA	0.149523321919994	3.23184813684867	3.2361013303618	0.0191173709396507	0.142728484407685	-2.88647499937551
Q8NFP9-1	NBEA	-0.0657713992208469	3.37664874939663	-3.40528122868326	0.0156009407730946	0.130174120735159	-2.89103350469521
P22314	UBA1	-0.0737606173012486	3.24821114494518	-3.91073246179013	0.00872772332636098	0.10730623935872	-2.89115310964535
Q96FZ2	C3orf37; HMCES	-0.107171846027681	3.21362511562732	-3.19351038604562	0.0201350664576672	0.144912035518971	-2.89234291922679
Q9NP81-1	SARS2	0.199620973172102	3.4430556430482	3.35906923207685	0.0164844080683829	0.134259031570179	-2.89444618298216
Q9BY44-1	EIF2A	-0.0783362637489634	3.30093829537756	-3.57741983302266	0.0127440745983188	0.122915332632965	-2.89903289546579
Q08AN1	ZNF616	0.180963021655678	3.44078379242525	3.22195237295495	0.019449019886755	0.142728484407685	-2.9033888798561
P09417	QDPR	-0.104309751106382	3.27582820209808	-3.33272095598414	0.0170128617422465	0.135819641297102	-2.90408437375495
P35240-2	NF2	0.104800442358571	3.26179592706522	3.22989027435878	0.0192621821552055	0.142728484407685	-2.90412579986799
Q9Y4W2	LAS1L	0.114799088112688	3.37846510454589	3.572992340953	0.0128098062051513	0.123017250719659	-2.90820375312416
Q86YC2	PALB2	0.126285391834894	3.34686195595664	3.16708646723527	0.0207963980049211	0.147050659441249	-2.90839947724581
O00401	ASB15; WASL	-0.0961808345097341	3.30418610801206	-3.20727308169692	0.0197998223728468	0.14344120608544	-2.90966930616006
Q92621	NUP205	0.0745769135491148	3.38676851478385	3.74785000688515	0.0104787652741335	0.114700701336071	-2.91057287970469
Q16773	CCBL1; KYAT1	-0.137061530692117	3.12271273834092	-3.152403162628	0.021174201597211	0.147969532323034	-2.91130020515172
P15121	AKR1B1	-0.102295304536008	3.15837236088261	-3.5561202849725	0.0130637809772973	0.123904056469314	-2.91235965793994
P41247-1	PNPLA4	0.180457682779057	3.43858622765822	3.22624584520212	0.0193477155667314	0.142728484407685	-2.91237203545739
P48147	PREP	-0.0982274187204387	3.30041023025581	-3.59798850898813	0.0124436008574864	0.122662747120447	-2.91362661869181
O00244	ATOX1	-0.156056192164791	3.12314854877056	-3.21836940585242	0.0195340079025116	0.142728484407685	-2.91385924280944
P27694	RPA1	-0.0995303971995498	3.31353153603706	-3.63311811653395	0.0119485266929579	0.120088056645234	-2.916735497879
O43924	PDE6D	-0.336261758015014	3.11494844920388	-3.70012913163494	0.0110640038469803	0.116918784454591	-2.91812714411991
Q13596	SNX1	-0.0711914587094143	3.28452107426694	-3.50012658443114	0.013947725301895	0.127237750910985	-2.91826117139015
Q6IN85	SMEK1; PPP4R3A	-0.0912757795466265	3.33065017323118	-3.35482745520159	0.0165682408498918	0.134259031570179	-2.91909290894504
P55347	PKNOX1	0.0878575259668751	3.34781039992834	3.21860528668653	0.0195284002265955	0.142728484407685	-2.9211157414899
P35659-1	DEK	0.0664370072505141	3.31091981258147	3.50135801768236	0.013927583280944	0.127205260632622	-2.92378406346224
Q14651	PLS1	-0.0961494560207987	3.27342651862011	-3.29414502097783	0.017820715707048	0.138651579999506	-2.92899310890694
Q8TEK3	DOT1L	0.103911050777035	3.33527649473639	3.14011153725019	0.0214962787067762	0.149383559998539	-2.93052334583091
Q9P0U3-1	SENP1	0.113699953894336	3.33494870131604	3.21964972184816	0.0195035918420934	0.142728484407685	-2.93238657051671
P48735	IDH2	0.113779347384463	3.09443856262585	3.43186097327226	0.0151166807587187	0.128968217412804	-2.9334365426423
P54098	POLG	0.112297261538335	3.34947150629252	3.1775362766367	0.0205320446672678	0.146124162047568	-2.93424430157401
Q6N069	NAA16	-0.0743637889448868	3.31003826832653	-3.32373502685409	0.0171973570733371	0.136299714325043	-2.93459846812085
Q969J2	ZKSCAN4	0.18479106260857	3.29531904714534	3.12500293727347	0.0218995730113161	0.150321027966593	-2.93516428240355
Q9ULH7-5	MKL2	-0.121899550791264	3.22138286209138	-3.12530610242374	0.0218913992901177	0.150321027966593	-2.93594288317355
Q96FJ0-2	STAMBPL1	-0.108065786246689	3.25517463169349	-3.12808896269663	0.0218165263074387	0.150248105772594	-2.93770938187275
P49915	GMPS	-0.0945407362140642	3.27396183646613	-3.70171083429624	0.0110440297596548	0.116868684573892	-2.93781379179592
Q8NEM7	FAM48A; SUPT20H	0.112490185151519	3.3107424195051	3.15636711100223	0.0210714696179594	0.147969532323034	-2.93823455936719
Q9H900-1	ZWILCH	-0.0909116587652002	3.31202150209355	-3.22631732540484	0.0193460339286521	0.142728484407685	-2.94010210457031
Q15370-2	TCEB2; ELOB	-0.11199355105802	3.36372279731503	-3.22011298819525	0.0194925990461483	0.142728484407685	-2.94047177122947
O75494-3	SRSF10; LOC100996657	0.132404251859666	3.37805856146203	3.14528084179212	0.0213601754628853	0.148846768802754	-2.94080023681464
O00534	VWA5A	-0.0756720451813796	3.41640076405323	-3.24920972922499	0.0188156760334672	0.1422866960775	-2.94710077521866
P04350	TUBB4A	-0.176227281607476	3.26724865957921	-3.2360018218293	0.0191196814951018	0.142728484407685	-2.94758372718039
Q92766-1	RREB1	0.163499996779235	3.41825326250995	3.28312186309645	0.0180592917784851	0.139773343058141	-2.94769234727976
P45983-4	MAPK8	-0.11075410049994	3.34615880283081	-3.26641598635518	0.0184276187900636	0.14081343760694	-2.94798730846949
P23284	PPIB	0.070302486615857	3.30322942840828	3.74403144219125	0.0105242968508628	0.114854061792062	-2.94961174628478
Q9BUL8	PDCD10	-0.126775483075025	3.30220699640162	-3.22944060525928	0.019272713122358	0.142728484407685	-2.95449408771946
P55081	MFAP1	0.0833017545959638	3.3343613314998	3.25735933653556	0.0186307620199017	0.141800799818141	-2.95593517412561
Q9UQ35	SRRM2	0.0445505714911392	3.36289341433358	3.96448121258607	0.00822404220109642	0.105127532836146	-2.95902810748195
Q96EI5-2	TCEAL4	-0.107175137718337	3.29955086183619	-3.15387358214624	0.021136029181885	0.147969532323034	-2.95905717612343
O60879	DIAPH2	-0.0723772997765846	3.24110177716102	-3.24833207014396	0.018835710647561	0.1422866960775	-2.9599986616612
Q75N03	CBLL1	0.0989248641879691	3.36494458868264	3.16297980036341	0.0209013101196755	0.147492451513827	-2.96081622982308
Q96RU3-2	FNBP1	-0.0957564731970126	3.29570356036014	-3.33767773727862	0.0169120298884648	0.135578989868654	-2.96254106207284
Q13685	AAMP	-0.0831987620128485	3.30526369503956	-3.29665205783383	0.0177669433192251	0.138651579999506	-2.96384648887314
Q9HD42-1	CHMP1A	-0.0827259952542647	3.30109493340011	-3.18259266159274	0.0204054616320848	0.14576415422845	-2.96397366760778
Q9HCI7	MSL2	0.106687804112199	3.37765364097452	3.15766152230336	0.0210380418184999	0.147951180826706	-2.96433325877313
P57764	GSDMD	-0.111024182868603	3.27014715842759	-3.11283087777592	0.0222305348258745	0.151282569008749	-2.96527840817817
Q9P2Y4	ZNF219	0.16086070975169	3.4656544761578	3.21397509795396	0.01963880073004	0.143048275776644	-2.96806888517414
P55769	NHP2L1; SNU13	0.102200035270599	3.34270591773205	3.35043957333115	0.0166554586462786	0.134364541255783	-2.96846390466465
Q9BVI4	NOC4L	0.0999178688890048	3.39332154053122	3.46769519014681	0.0144900374318117	0.128860838568137	-2.96930223800112
Q15170-2	TCEAL1	-0.150680635621441	2.9483966091426	-3.10796307408608	0.022364427179461	0.15156856490951	-2.970765257938
P07108-5	DBI	-0.118302797739658	3.01421542631097	-3.22029524662451	0.0194882761296912	0.142728484407685	-2.97574169519216
Q9ULV3	CIZ1	0.072681103431946	3.27799578606759	3.29932782479475	0.0177097498198863	0.138500714187734	-2.97702010024919
Q9Y3T9	NOC2L	0.119727191901912	3.38441957020078	3.44454323492906	0.0148915230831711	0.128968217412804	-2.97713886956797
P42226	STAT6	-0.107404705903303	3.22969964023729	-3.10677386941703	0.0223972715863757	0.15156856490951	-2.98109731968318
Q8WYH8-1	ING5	0.156813658086705	3.43084737917855	3.10321048668205	0.0224960056311629	0.15156856490951	-2.98111877978399
O15169	AXIN1	-0.158555371970836	3.34817516062412	-3.09669956536857	0.0226776470582148	0.151971637646639	-2.98267009686341
Q13610	PWP1	0.109272792250044	3.38330649584471	3.30785765631408	0.0175287831066036	0.13750595500395	-2.98942673410607
O14841	OPLAH	-0.0806311594860241	3.39765174364532	-3.1616355909256	0.0209357768115951	0.147492451513827	-2.99026923085942
Q96EK6	GNPNAT1	-0.148748371526961	3.3000917285144	-3.10073198375225	0.0225649617630344	0.1518582339	-2.99170775793649
Q12792-2	TWF1	-0.0836033047485021	3.1382807695586	-3.28109998817773	0.0181034337000459	0.139868623712741	-2.99181069262561
Q14692	BMS1	0.125074310619703	3.4070638086824	3.50545544219822	0.0138607962122215	0.126924544141408	-2.99522449677518
Q14CZ7	FASTKD3	0.194459291428057	3.40024160278636	3.07396133816964	0.0233247403417527	0.154321990420684	-2.99827562827434
P52735	VAV2	-0.100503755200787	3.35223044602902	-3.22128219043802	0.0194648855577138	0.142728484407685	-2.99837439575531
Q96KG7-1	MEGF10	0.122213022275238	3.37893571833699	3.07129767700645	0.0234018602737554	0.154321990420684	-2.99848840648725
Q01780	EXOSC10	0.11872122813518	3.3509843460153	3.56333919087243	0.0129544340456634	0.123768889163549	-3.00330029576978
Q96EN8	MOCOS	-0.130616641284675	3.30893837991875	-3.06950068101324	0.0234540459893792	0.154321990420684	-3.00334955280293
P48739-3	PITPNB	-0.135930953480374	3.11989152915287	-3.27538340032714	0.0182288859161391	0.140272831242346	-3.00805866243873
Q6UN15-1	FIP1L1	0.203864352444461	3.36314503775746	3.24576078552478	0.0188945419407674	0.142395801345351	-3.00897612060038
Q9BWJ5	SF3B5	0.142959384908795	3.23389632071457	3.18382073994011	0.020374847479605	0.14576415422845	-3.01214372457799
Q14566	MCM6	-0.086466396598793	3.35384265634116	-3.64469367647959	0.01179024403173	0.120088056645234	-3.01288883197622
P62910	RPL32	-0.0640416184895589	3.36185035123854	-3.66484323944491	0.0115202792998466	0.119115340685207	-3.01465392301479
Q9BXF3-1	CECR2	0.0911547424629854	3.44790765301971	3.49133631037898	0.0140924492449688	0.128101031525357	-3.01683572260505
Q9H1B7	IRF2BPL	-0.063306060975766	3.40550044687802	-3.26976797471124	0.0183530542674432	0.140487257330937	-3.01708729642478
Q9H6S0	YTHDC2	-0.0517417607039169	3.31175386912823	-3.45015418759022	0.0147930987346317	0.128968217412804	-3.0233090424296
Q8N960	CEP120	0.0964499601324343	3.2890219561693	3.07057171864188	0.0234229271384662	0.154321990420684	-3.02479351295774
P41240	CSK	-0.154054589504953	3.02941362172593	-3.21007384993887	0.0197323551182114	0.143222921917614	-3.02555738347536
Q6ZU65-1	UBN2	0.0774351371249056	3.39610474959336	3.21370420827077	0.0196452810062363	0.143048275776644	-3.02686602100938
P35237	SERPINB6	-0.127949388609918	2.93503030629799	-3.13149231146106	0.0217253415265787	0.150104482977403	-3.02719056957147
Q6PL18-1	ATAD2	0.116233817860488	3.14224783888725	3.33440897590045	0.0169784491323381	0.135819641297102	-3.02743888799425
O75347	TBCA	-0.145501193561611	3.28431808553959	-3.31483286734606	0.0173823190175366	0.136956714730051	-3.02752568967508
O43251-8	RBFOX2	0.213594464035488	3.32975080177038	3.05117057486881	0.0239937141366172	0.155735850132087	-3.0283524780755
Q9P270	SLAIN2	-0.106103920782616	3.3107239256891	-3.06375334175863	0.0236218106301842	0.154762195691523	-3.03048484228877
Q13838-2	DDX39B	0.0899650619735366	3.35785475260889	3.47505263293448	0.0143649809422979	0.128860838568137	-3.03071175852324
Q6IQ32	ADNP2	0.0926593049049286	3.40629824720651	3.15760655478921	0.0210394601514515	0.147951180826706	-3.03119018707671
O43683	BUB1	-0.0873020495213025	3.35738659100955	-3.39286495343392	0.0158330357623548	0.130740474007642	-3.03161533433891
Q14258	TRIM25	-0.0657521476039666	3.12935231820203	-3.33824934280696	0.0169004447988941	0.135578989868654	-3.03362899852417
P22087	FBL	0.0641744231323396	3.36820116848851	3.65408552265519	0.0116635417998573	0.120020151427835	-3.0350850508317
Q96PE3-3	INPP4A	-0.06046226557187	3.01432585191011	-3.25063961335443	0.0187830859776117	0.1422866960775	-3.03539793790561
Q07021	C1QBP	0.16166732722416	3.37381861119285	3.44531189845046	0.0148779966780535	0.128968217412804	-3.03759411327527
Q9P2P1	NYNRIN	-0.0930870531468873	3.43071056460765	-3.14069124098887	0.0214809682278984	0.149383559998539	-3.03784673607264
Q6VEQ5		-0.101164361594287	3.20240176259992	-3.04888025976385	0.0240620960799817	0.15591587932907	-3.03842168138564
Q9UKF7-2	PITPNC1	-0.148759035334392	3.39671318463933	-3.09893466361114	0.022615111448778	0.151899491109784	-3.04084683742666
Q9NS73	MBIP	0.101945982976249	3.34133107019119	3.09442120233811	0.0227415886701668	0.151971637646639	-3.04334525979473
Q9ULE0	WWC3	0.127326800397624	3.34758751493635	3.0317536141936	0.0245802676978431	0.15768952073351	-3.04459902768112
Q8TEQ6	GEMIN5	-0.05544808313604	3.35103877310202	-3.63237876873035	0.0119587167983523	0.120088056645234	-3.04855912667406
P38432	COIL	0.0913395160843247	3.34431604563241	3.10298882796302	0.0225021631167795	0.15156856490951	-3.05233534837769
Q8TBZ6	TRMT10A	-0.139055389355143	3.13243512789165	-3.02443050737202	0.0248055506171569	0.158774251190686	-3.05259883406274
P62424	RPL7A	-0.114792341686197	3.34584508515129	-3.71083392762657	0.0109296059588568	0.116185616407132	-3.05279392061599
Q9NPQ8-3	RIC8A	-0.0832460042721962	3.29436815259533	-3.14507426745732	0.0213655961620669	0.148846768802754	-3.0535832947429
Q9BUT1-1	BDH2	-0.0912837215801657	3.32080579986435	-3.07416281696331	0.0233189183586409	0.154321990420684	-3.05384022719755
Q6P9B9	INTS5	0.0754508022950206	3.32245626324752	3.11803286345448	0.0220884234201075	0.151170726564732	-3.05517032529183
Q8N5Y2-1	MSL3	0.119713772461662	3.37458726232596	3.00794787721369	0.0253209253636277	0.159973984141078	-3.056215887544
P62993	GRB2	-0.0993914556742568	3.18638968277886	-3.24003165815967	0.0190263560614665	0.142728484407685	-3.05653905609423
Q9BXJ9	NAA15	-0.0795361725225181	3.31413726444779	-3.58899449979462	0.0125740047056426	0.122851393877235	-3.05659613817374
Q13129	RLF	0.0866204489070429	3.37090605488782	3.27075701182557	0.0183311170196858	0.140487257330937	-3.05936327790269
Q96EU6	RRP36	0.105114537416423	3.40808807844362	3.09838439122413	0.0226304898772788	0.151899491109784	-3.05986784367445
P34949	MPI	-0.130860575104382	2.69149183862215	-3.1787749202735	0.0205009562978561	0.146038381352973	-3.06136595205373
Q6RI45	BRWD3	0.125628416309784	3.36513707824684	3.1043854574157	0.0224633968625328	0.15156856490951	-3.06244892986539
P56270-2	MAZ	0.152898639685318	3.33204400194488	3.01259545555069	0.0251744297261845	0.15988263647292	-3.06739140521727
P21964-1	COMT	-0.126656977637358	3.1114948288796	-3.05163216523365	0.0239799582397982	0.155735850132087	-3.06890600790445
P84098	RPL19	-0.0470758044198927	3.34617287375676	-3.47135679850553	0.0144276493774997	0.128860838568137	-3.07012118848022
Q13404-1	TMEM189-UBE2V1; UBE2V1	-0.122895061736744	3.26804772311658	-3.07495475427705	0.0232960497793218	0.154321990420684	-3.07577071198057
P29373	CRABP2	-0.159862059694015	3.27625440963807	-2.99170590535043	0.0258402572819119	0.161570052051204	-3.07711552794086
Q16718	NDUFA5	0.176199491729439	3.39464082214176	3.06627431903714	0.0235480618902978	0.154542969052493	-3.07766960939521
Q9H9A6	LRRC40	-0.0875686848512299	3.28755593407693	-3.24749948642921	0.0188547380865154	0.1422866960775	-3.07844162236621
P50995	ANXA11	-0.0916439109917727	3.03998764183531	-3.0996217811162	0.0225959247290674	0.151899491109784	-3.07869814146473
Q9H5V7	IKZF5	0.144705329865145	3.35905034981942	2.98033937016901	0.0262106229371004	0.163067796087814	-3.08331331665909
Q16881-1	TXNRD1	-0.105799987956063	3.24344906363285	-3.42807421683283	0.0151846411497102	0.128968217412804	-3.0854287059765
Q8TCX1-2	DYNC2LI1	-0.115057695713309	3.16003738891845	-2.9740317878325	0.0264186485698061	0.163324492318444	-3.08846675681388
Q9BUE6-2	ISCA1	0.144932200902368	3.4350254145549	3.00924687117497	0.0252798862599226	0.159973984141078	-3.08929164774695
Q9NSV4-3	DIAPH3	-0.0705054271215953	3.29821571966078	-3.22622615610907	0.0193481787992429	0.142728484407685	-3.08960317993234
P83731	RPL24	-0.0773163015219107	3.33682958078627	-3.4954783763781	0.0140240467038896	0.127630470121282	-3.09069451109236
P30419	NMT1	-0.0889649782320281	3.27766986166312	-3.19936516706763	0.0199916916993221	0.14442208918757	-3.09258348749112
Q9Y6D6	ARFGEF1	-0.0461136886070959	3.3960851396964	-3.44065158280942	0.0149602157299663	0.128968217412804	-3.09904449497546
Q8N5I9	C12orf45	-0.109187823315902	3.36834050454242	-2.99789049739391	0.0256411460062478	0.160849445756282	-3.10132274162053
P12694	BCKDHA	0.164043096969141	3.32503220757061	3.13876693869287	0.0215318369510564	0.149425089004382	-3.10272395995384
P13804-1	ETFA	0.155088931650051	3.34202574669648	3.18169732107375	0.0204278130705695	0.145788076165032	-3.10356778655092
O95861-1	BPNT1	-0.125515617885416	2.76419957939863	-3.05417933219469	0.0239042051935191	0.155437736385217	-3.10427246449971
O95155-4	UBE4B	-0.0631927322718889	3.36734924622304	-3.39644255828045	0.0157657697451622	0.130480027491785	-3.10635118093296
P00813	ADA	-0.1846227342924	2.60830154898189	-3.02416856603232	0.0248136505705987	0.158774251190686	-3.10685761619456
P14735	IDE	-0.0702397338347331	3.32116802183272	-3.32842146255615	0.0171008622561131	0.136097318702179	-3.10698585238293
P08621-1	SNRNP70	0.0493775987111518	3.32845625405845	3.51133177274469	0.0137656348130947	0.126924544141408	-3.10753692128108
Q7L1Q6-3	BZW1	-0.105747258203533	3.35098214874335	-3.2579154269301	0.0186182177179952	0.141800799818141	-3.11038692526932
P56192	MARS	-0.0848394791243618	3.31691338935741	-3.44378031205712	0.0149049619823112	0.128968217412804	-3.11227810356147
Q96MW7	TIGD1	0.122307212098584	3.30446485553785	2.94801393785559	0.0272959871515258	0.164893553879138	-3.11795718672525
Q9Y6D9	MAD1L1	0.082376940809406	3.36513164155927	3.35099949663604	0.0166443008016762	0.134364541255783	-3.11937355602112
O76074	PDE5A	-0.0717614123367963	3.36651230943048	-3.12925427470888	0.0217852572052622	0.150182769535978	-3.12128474503725
Q9NZE8	MRPL35	0.164343935402826	3.40261583658332	2.95818810823915	0.0269491760466167	0.164549867925337	-3.12228822294452
O75208-1	COQ9	0.210894651597319	3.29828252347506	2.95336412518534	0.0271130097146026	0.164549867925337	-3.12238114499026
P52756	RBM5	0.0965934130386374	3.35319386364186	3.13105719367983	0.0217369760933126	0.150104482977403	-3.12244723973669
Q53EL6-1	PDCD4	-0.138907309130969	2.88927084370049	-3.00508540242146	0.0254116170452302	0.159973984141078	-3.12380538442786
P60468	SEC61B	-0.20617454140401	3.30106672914862	-2.97018537865484	0.026546389132951	0.163848670497184	-3.12432328055322
Q96IR2	ZNF845	0.352730391671734	3.42729728008687	2.94465133584578	0.0274116782344117	0.16507252387316	-3.12709403476445
O95071	UBR5	-0.0642453524588518	3.34751500343153	-3.51768859985512	0.0136635104659555	0.126662547620732	-3.12716264650093
Q9Y2I7-1	PIKFYVE	-0.066210332059858	3.3179930773638	-3.25270086897045	0.0187362152951468	0.1422866960775	-3.12782145465681
Q96ME1	FBXL18	-0.0703577418607021	3.32743697230421	-3.11086029590751	0.0222846306651596	0.15143284894872	-3.12820804689688
Q9BTW9	TBCD	-0.088636430221985	3.32195648625125	-3.21340853011369	0.0196523569693147	0.143048275776644	-3.13106112777566
Q9Y2B0	CNPY2	0.0957480590427022	3.34769145157699	3.07747852953894	0.0232233353499268	0.154316188968054	-3.13112808525527
Q13796	SHROOM2	0.0674114354915021	3.4486231021909	3.33179636569834	0.017031743523132	0.135829039822733	-3.13387068744356
O00330-1	PDHX	0.139283759246705	3.40913337266602	3.00661932798068	0.0253629736236455	0.159973984141078	-3.13648420767592
Q9BUZ4	TRAF4	0.133995618461253	3.4090201336915	3.04509190573293	0.0241756743110754	0.15638766721296	-3.13982154757555
O43353-1	RIPK2	-0.0981277795470286	3.314664008559	-2.96141378636667	0.0268402276961027	0.164437429366573	-3.13987007204524
P49736	MCM2	-0.0417593172628211	3.32829384910341	-3.62336176108076	0.0120837784614456	0.120554939344877	-3.1401805306393
Q9UHA3	RSL24D1	0.111825511273869	3.37066940490632	3.0053409105944	0.0254035073609978	0.159973984141078	-3.14037109596468
Q9BWF2	TRAIP	0.224468694874079	3.36463437676517	2.92426749848941	0.0281245403556585	0.166541466391045	-3.14097770426488
P33240	CSTF2	0.0886396880187389	3.34906426419828	3.03597542476778	0.0244514098691303	0.157639677744511	-3.1419535238986
P54578	USP14	-0.0827168168521738	3.2784756356534	-3.36569286961735	0.0163544398001348	0.13348006611344	-3.14229951780131
Q96HP4	OXNAD1	0.126766570058746	3.32439357411119	2.92475380782753	0.0281072996589085	0.166541466391045	-3.14318373174263
Q9ULW3	ABT1	0.0912019714315064	3.32159429299894	2.9762920253987	0.026343898685462	0.163123802029753	-3.14434844636569
Q8NCM8-2	DYNC2H1	-0.0527415840034509	3.22935156194721	-3.42357813037049	0.0152657728034493	0.128968217412804	-3.14535614295469
Q9Y324	FCF1	0.0914366705404012	3.37707253153606	3.05599778288307	0.0238502847628828	0.155330547284242	-3.14690597073136
Q96BW9-3	TAMM41	0.139316273816899	3.37320567492908	2.93063515101883	0.0278997034672784	0.166480913932473	-3.14792152236875
Q9NQC1-1	PHF15; JADE2	0.099146235895445	3.4689844930136	2.97338219392591	0.0264401745906553	0.163324492318444	-3.14835273680731
O14910	LIN7A	0.134398943476131	3.40705015580419	2.91746121698423	0.0283670510652639	0.167409242902081	-3.14855387393392
P62136-1	PPP1CA	0.124302005295281	3.31959737497668	2.91474548994388	0.0284644488953283	0.167597276995363	-3.1497048683141
O00273-1	DFFA	-0.157703247482418	3.07148880311747	-2.95586951914672	0.027027785416855	0.164549867925337	-3.14981893589444
Q96N46	TTC14	0.127705573275228	3.34822121335639	2.94242172539812	0.0274886834479118	0.165406415225395	-3.15028034758691
Q9UBB4-1	ATXN10	-0.0999656989841626	3.30179380742703	-3.33929344760094	0.0168793059536717	0.135578989868654	-3.15104073366096
Q96DV4	MRPL38	0.173538305976055	3.3927755669199	3.00813261439115	0.0253150845198548	0.159973984141078	-3.15219847761375
P42858	HTT	-0.0576582473398771	3.32770690976344	-3.42607133008504	0.0152207238421657	0.128968217412804	-3.15371014059036
P49643-1	PRIM2	-0.0834872273974118	3.34326628969389	-3.12478360082998	0.021905488694819	0.150321027966593	-3.15430321781328
Q14894	CRYM	-0.163187586441396	3.41954814330381	-2.90971163352664	0.0286459501208441	0.167988157273279	-3.15608481270013
Q96I25	RBM17	0.0831366712316983	3.33726346383581	3.31782102440555	0.0173199891090964	0.136847534958793	-3.15618703878042
Q15345-2	LRRC41	-0.0708179050615208	3.31193662133741	-3.0695085889483	0.0234538160592886	0.154321990420684	-3.15706821675487
Q9H4B0	OSGEPL1	0.175894600372949	3.30654482502199	2.92280120912037	0.0281765932449917	0.166541466391045	-3.15766901921895
Q8NEZ4-3	KMT2C; MLL3	0.0963336412619516	3.27438558561215	3.13694350731317	0.0215801614464097	0.149425089004382	-3.15950420478771
Q8WVM0	TFB1M	0.119205608473086	3.40180850013949	2.97879155720683	0.0262615039388242	0.163123802029753	-3.16033142577529
Q9UHD2	TBK1	-0.078078378241499	3.19124015142601	-3.18884781695928	0.0202500564843038	0.145126381764755	-3.16201611254061
P51452	DUSP3	-0.200882519211519	3.08075744280592	-2.93295202727636	0.0278183832914037	0.166476315609711	-3.16317624560489
Q14146	URB2	0.099459205766136	3.37554105219327	3.28249876199121	0.0180728827311882	0.139773343058141	-3.16399650631315
Q8N122	RPTOR	-0.0677174751134653	3.18772355526852	-3.11473228685332	0.0221784746556696	0.151282569008749	-3.16496672431798
Q9NZU5	LMCD1	-0.0870818761385167	3.41695671926994	-3.06122161050664	0.0236961289736331	0.154852386274032	-3.16562356046126
Q9BUJ2-1	HNRNPUL1	0.053996061694444	3.30971596993364	3.47009625317668	0.0144490933096767	0.128860838568137	-3.16616482736067
Q2TAL8	QRICH1	-0.104477631954824	3.33248625748266	-2.94595003827915	0.0273669327819275	0.16507252387316	-3.16628773837427
Q96JG6	CCDC132; VPS50	-0.100201807163275	3.18601462644992	-3.11691387982617	0.022118908092277	0.151244441073038	-3.16670687125082
Q5VUJ6	LRCH2	0.0951530838433566	3.22904478718479	3.01377432836172	0.0251374182941627	0.159813567253109	-3.16682784819946
P55212	CASP6	-0.120433421038817	3.29478730087405	-3.11959254050722	0.0220460098662781	0.151015167584005	-3.17111560604398
P46013	MKI67	0.141554995040216	3.45983075745495	3.17414749578388	0.0206173644206288	0.146188927758839	-3.17290319960533
Q15121-2	PEA15	-0.133623831133218	3.22083223636093	-2.89486420239138	0.0291886737077697	0.169007928064913	-3.17396879565268
O75044	SRGAP2	-0.074938807608038	3.24092475522277	-3.10831104691336	0.0223548265967629	0.15156856490951	-3.17402370293286
P05166-2	PCCB	0.150482024422901	3.41160031409425	3.05407631174235	0.0239072639382893	0.155437736385217	-3.17657599554995
P31483	TIA1	0.094127125299149	3.37367117243952	2.95104445733271	0.0271921778813938	0.164673696621103	-3.17658544861225
Q9UPN4-2	AZI1; CEP131	0.0831628366057751	3.34930286010098	3.2898849859376	0.0179125006795668	0.138953190307014	-3.17661839836715
P05783	KRT18	0.0755874594159881	3.48023520542054	3.5823861703084	0.0126707904643761	0.122895454415541	-3.18146183862027
O15318	POLR3G	-0.12299914027855	3.43533634875329	-2.93583092594129	0.0277176966400075	0.166262783483804	-3.18229246347516
Q5VZE5	NAA35	-0.0808807107522369	3.30624820580893	-3.19013887396803	0.0202181436696255	0.145126381764755	-3.18288396710294
Q3B7T1	C10orf137; EDRF1	-0.0630868770577706	3.33342230059793	-3.22545181969261	0.0193664066044947	0.142728484407685	-3.18421409063137
Q6RFH5-1	WDR74	0.141225391731969	3.39204750366292	2.99283463467596	0.0258037923783421	0.161473650184862	-3.18614944023165
P63302	SEPW1; SELENOW	-0.116464257825031	3.40460970947539	-2.94486001913243	0.0274044828868977	0.16507252387316	-3.18628058523076
Q9Y2X9	ZNF281	0.0919456331553666	3.44031853789816	3.10971726750351	0.0223160750164353	0.151512325244329	-3.18770737094109
Q9BPX3	NCAPG	-0.0588243272910007	3.32241947111247	-3.29653765504899	0.0177693931853315	0.138651579999506	-3.18928665120623
Q7Z739	YTHDF3	-0.0634751143201142	3.38572445582369	-3.21076820734003	0.0197156680979416	0.143222921917614	-3.18978820056736
Q70CQ2	USP34	-0.0678441000938616	3.26964492283461	-3.19837009482497	0.0200159799319731	0.144461522143084	-3.18990161741481
A1X283	SH3PXD2B	-0.0943597012324587	3.36992795884181	-3.28466426724108	0.0180256977566484	0.139690053726269	-3.19036973904359
Q9P1U0	ZNRD1	0.153307645379679	3.40168924512595	2.92567831947309	0.0280745555268252	0.166541466391045	-3.19048822443181
Q9HD67	MYO10	0.0920191695366489	3.48142413272975	2.93521057729793	0.0277393590796754	0.166262783483804	-3.19107772992419
P60174	TPI1	-0.16660702737753	3.14410291729858	-3.6395817271316	0.0118598534904784	0.120088056645234	-3.19172069745087
Q92828	CORO2A	0.073355478263334	3.43541035546744	3.00867343063105	0.0252979939816322	0.159973984141078	-3.19186331272595
P46060	RANGAP1	0.048756338707579	3.34950611852583	3.44425611521404	0.0148965791209839	0.128968217412804	-3.19340163096125
Q92841	DDX17	0.0756672328279101	3.31814444319889	3.61188085225081	0.0122451320007705	0.121689964650144	-3.19392953877091
P30038	ALDH4A1	0.14727019073537	3.46465799223628	3.14451680992873	0.0213802319109273	0.148846768802754	-3.19441464001594
O94885	SASH1	-0.0798779435561769	3.43026407055461	-2.99896674054083	0.0256066683589087	0.160764615097829	-3.1955098714157
O00746	NME4	0.135802177322397	3.43837971174065	2.93127240762199	0.0278773105447845	0.166480913932473	-3.19594125435608
Q01433-1	AMPD2	-0.132465732456016	3.25672296513758	-2.94555679225473	0.0273804732489922	0.16507252387316	-3.1967232729304
O14981	BTAF1	-0.0586967880959405	3.33196046403636	-3.22783533159099	0.0193103594791945	0.142728484407685	-3.19720619437697
O00425	IGF2BP3	-0.0822696913839467	3.42978011705636	-3.44051879561954	0.0149625657976637	0.128968217412804	-3.20106135436365
Q9NPG3-1	UBN1	0.0961801759243318	3.3197799974031	2.96625705162757	0.0266775470035813	0.164245750952721	-3.20251879371065
Q9HAF1-3	MEAF6	0.107774491923976	3.38725176200535	2.95372515429568	0.0271007107601433	0.164549867925337	-3.20377383552545
Q14563	SEMA3A	0.16351897242543	3.39374609697628	2.87479028125351	0.0299403174859396	0.170703620147178	-3.20413275601385
Q9Y3L3-1	SH3BP1	-0.0651613744858189	3.33550798167302	-3.1513649824875	0.0212011986745283	0.148003272275688	-3.20432493651665
P28340	POLD1	-0.0501380876450257	3.31228654419579	-3.24720302016847	0.018861518497239	0.1422866960775	-3.20608165101733
O43660-1	PLRG1	0.0930332956116303	3.37915973005956	3.2795651916407	0.0181370212822292	0.139987150178332	-3.2069102304254
Q567U6	CCDC93	-0.10818959175704	2.98995569019305	-2.89914647995802	0.0290310019261235	0.168934241390422	-3.20846219853538
P27635	RPL10	-0.0619716099171901	3.32661708536154	-3.45407508932154	0.0147247495258805	0.128968217412804	-3.21064677691034
Q9Y3I0	C22orf28; RTCB	-0.0386107663484563	3.30255160408383	-3.46642182169946	0.014511803886678	0.128860838568137	-3.21081691801822
Q9UBW7	ZMYM2	0.037395182359925	3.46232726452617	3.47846435963919	0.0143073986244939	0.128860838568137	-3.21270268726357
Q9Y6Y0	IVNS1ABP	-0.110278782880101	3.39721990194853	-3.10301003546466	0.0225015739108265	0.15156856490951	-3.21292577201507
Q9UDR5	AASS	0.138021322534816	3.46559711526433	3.40536342824906	0.0155994168683896	0.130174120735159	-3.21319423673578
P18124	RPL7	-0.0899363452875305	3.34969353674288	-3.44703214921023	0.014847774345715	0.128968217412804	-3.21351971814415
Q00169	PITPNA	-0.127835923524137	3.28608326101822	-3.09376327072745	0.0227600901532831	0.151971637646639	-3.21492651822364
Q9ULI2-1	RIMKLB	0.260949547017207	3.43384997354706	3.06235108251148	0.023662941970546	0.154852386274032	-3.21684059653106
Q9Y4B6	VPRBP; DCAF1	-0.0477947252969553	3.27791804656922	-3.22765598528054	0.0193145704876282	0.142728484407685	-3.21967048154348
P31327-3	CPS1	0.129290050524295	3.3561254401108	2.91656618413127	0.0283991106669382	0.16746962108897	-3.22101309000027
Q9H7C9-1	AAMDC	-0.135423635768912	2.88388573179021	-2.84451666574406	0.0311139812843682	0.173604701391762	-3.2223926801186
Q32MZ4-2	LRRFIP1	-0.0861657647993469	3.0344931484576	-3.19631461916975	0.0200662540913603	0.144552395670344	-3.22248002408493
Q9NTG7	SIRT3	0.191116797771168	3.39364692272043	2.8738754018883	0.0299750721606036	0.170703620147178	-3.22299486344771
Q9NRN9	METTL5	-0.13591650447014	3.30917809310606	-2.92637446770091	0.0280499269642388	0.166541466391045	-3.22381250896128
O75828	CBR3	-0.159945518264106	3.21022394662308	-2.84150435614768	0.0312334708049891	0.173777106113134	-3.2268534532417
P14678-3	SNRPB	0.0647056391829487	3.34354763049028	3.42276401941768	0.0152805148107715	0.128968217412804	-3.22966974550519
Q15691	MAPRE1	-0.0971984724960834	3.23703617927802	-3.15357356184105	0.0211438116212345	0.147969532323034	-3.23012217714576
Q9UEE9-1	CFDP1	-0.0979683156212806	3.27567372673963	-2.98634303315536	0.0260142825674698	0.162393373823414	-3.23459990055241
O75323-1	GBAS; NIPSNAP2	0.194582968118881	3.23959066925736	2.87455237813018	0.0299493507927076	0.170703620147178	-3.23593628491694
Q9BYD3	MRPL4	0.14810115594249	3.34396444142776	3.01676364191669	0.0250438336717985	0.159581637815646	-3.23825795917776
P22033	MUT	0.154655767988087	3.36383823168126	3.13722189922127	0.0215727758071914	0.149425089004382	-3.24029188972818
O15151	MDM4	-0.167029417636223	3.39636606242234	-2.86483008393528	0.0303210590931289	0.171551006904487	-3.24047998175121
Q9NVA1	UQCC; UQCC1	0.153169782700529	3.37341072359024	2.91547595459688	0.0284382154641745	0.16757142015449	-3.24141864430831
P09884	POLA1	-0.0752317356512758	3.33251109834538	-3.37768718913367	0.0161219697765644	0.132078718948993	-3.24274860007775
P45954	ACADSB	0.122200456331615	3.37786236711889	2.95622173721176	0.0270158277175094	0.164549867925337	-3.24388646732313
Q9H3R5	CENPH	-0.0693342251384235	3.33925454685936	-3.08180458507809	0.0230992726932272	0.153834739672256	-3.24425746440232
Q49AR2-1	C5orf22	-0.127464291476603	3.259655982676	-2.87410476936271	0.0299663547698788	0.170703620147178	-3.24687509084694
Q7L3S4	ZNF771	0.126347310901282	3.3030085532964	2.81869102403684	0.0321547479719267	0.176817066837866	-3.25103991126203
Q13595-1	TRA2A	0.12023141929303	3.35293431127799	2.96284356391885	0.0267920904028326	0.164437429366573	-3.25151417378012
Q9BVS4	RIOK2	-0.0767674388991085	3.38628131902442	-3.01880883348767	0.0249800258393704	0.159581637815646	-3.25253881970761
Q9HCE6	ARHGEF10L	-0.121526954373715	3.44525093802201	-2.81814362242282	0.0321772129996898	0.176817066837866	-3.25321149266023
Q15119-1	PDK2	0.186195886329227	3.2730204006504	2.85945610064023	0.0305286704890206	0.171998683811597	-3.25658441006658
Q8TB37-1	NUBPL	0.162527894362644	3.33566568310963	2.80954389566938	0.0325323840075662	0.176817066837866	-3.2581925342583
O75319-1	DUSP11	0.133191039621391	3.35431812143674	2.81561998553314	0.0322810019066225	0.176817066837866	-3.2586927085906
O43252	PAPSS1	-0.0785876893335214	3.26918721075488	-3.19642101237132	0.0200636484442294	0.144552395670344	-3.26134987182304
Q9NUG6	PDRG1	-0.181561121006135	3.20975997374983	-2.80599502780982	0.0326801903386692	0.176817066837866	-3.26295660043276
Q9BQ95	ECSIT	0.155726308479259	3.35683728786389	2.88630168065199	0.0295067453779439	0.169824268971932	-3.26387885248199
P57076	C21orf59	-0.0966014184502826	3.26626905514702	-2.95603733543122	0.0270220873830037	0.164549867925337	-3.26579031184271
O75521	ECI2	0.0704098712902727	3.39984401743485	3.1123837382071	0.0222427969032676	0.151282569008749	-3.26686777283796
P10109	FDX1	0.145975686361528	3.39270630098649	2.81128211615517	0.0324602536699665	0.176817066837866	-3.26817405470022
Q9H9P8-1	L2HGDH	0.149708353773922	3.41008845470266	2.97687893560628	0.0263245263885107	0.163123802029753	-3.26871330810091
P0C1Z6	TFPT	0.106860796655784	3.35945609816472	2.82762697482409	0.0317904179695423	0.175644963145791	-3.2708961089463
Q9Y546	LRRC42	-0.111651011892476	3.34281983631583	-2.88000086971492	0.029743210180074	0.170673080405032	-3.27097635402271
Q6UB35-1	MTHFD1L	0.14938479437071	3.43633680004361	3.21910865281493	0.0195164394684068	0.142728484407685	-3.27155245184196
Q13503	MED21	0.156396871232712	3.34808528699309	2.80845055966987	0.0325778428179546	0.176817066837866	-3.27286935084691
Q9UGU5	HMGXB4	0.0958891324680945	3.33477877635026	2.86952215454758	0.0301410466435223	0.170977421316764	-3.27384944086549
P45985-2	MAP2K4	-0.116582302193091	3.30669538518974	-2.83023558248454	0.0316849082617684	0.175387168964132	-3.27503393785395
Q9H1I8-1	ASCC2	-0.0690022075308915	3.29981319174215	-2.98592361406416	0.026027946647593	0.162393373823414	-3.27764700691676
O14628-1	ZNF195	0.0905635482552513	3.42408178317671	2.85262541401689	0.0307947912083337	0.172840130731285	-3.27807908045637
Q14194-2	CRMP1	-0.0778763398348604	3.36664949501069	-3.23246419375853	0.0192020246590501	0.142728484407685	-3.27810120023458
O00625	PIR	-0.109206436004698	3.3338751355491	-2.91091255003147	0.0286025355133969	0.167988157273279	-3.27888421096966
Q8N9Z2-1	CCDC71L	0.162089833929912	3.3669757984318	2.80897345749323	0.0325560931442918	0.176817066837866	-3.27930481298998
P12955	PEPD	-0.117260681013294	3.30627306278967	-3.06132920414529	0.0236929653772802	0.154852386274032	-3.28313926380009
Q9UJZ1	STOML2	0.148292168590832	3.37263706406764	2.96589268104895	0.0266897483297839	0.164245750952721	-3.28572650562616
P48506	GCLC	-0.10545391104654	3.31615999510781	-2.90452502837654	0.0288342785675419	0.168481786115903	-3.28578182671395
Q8TDM6-1	DLG5	0.0729583228033537	3.42212171172969	3.080443392254	0.0231382303913992	0.153960540817705	-3.28664768261001
O75127	PTCD1	0.161950847152179	3.40571138699792	2.83691750129783	0.0314163761092901	0.174277973615671	-3.2887205994832
Q8NC44	FAM134A; RETREG2	0.253894000319928	3.36729082752843	2.98504484827267	0.0260566010397058	0.162393373823414	-3.29077003303536
P42694	HELZ	-0.0579443904405718	3.26703219061874	-3.09465544920713	0.022735005476324	0.151971637646639	-3.29494179425264
Q9Y617-1	PSAT1	-0.0853378389597765	3.33914376094083	-3.51281213726716	0.0137417766157988	0.126924544141408	-3.29496887099168
P55884-2	EIF3B	-0.062234158300327	3.33848526423833	-3.43456110700743	0.0150684281859529	0.128968217412804	-3.29516253376863
Q8NEF9	SRFBP1	0.0988466111747047	3.37664932178131	3.05716622130129	0.0238157087749666	0.155237143348805	-3.29918515231949
O94880	PHF14	0.119431814947728	3.3841089128798	2.79082887793132	0.0333200956421411	0.17904344965357	-3.3007561438318
P42126	ECI1	0.135655502727675	3.21706303455645	2.93045746137437	0.0279059509016111	0.166480913932473	-3.30176858681409
O75832	PSMD10	-0.119773827588101	3.19503515454843	-3.03227781956972	0.0245642275649839	0.15768952073351	-3.30229661684137
P35520-2	CBS; LOC102724560; CBSL	-0.0843026250385143	3.35225530980049	-3.29336535253781	0.01783747516417	0.138651579999506	-3.30409343165074
Q9P2D1-1	CHD7	0.0853180783556991	3.412631154628	3.35091859949187	0.0166459123636147	0.134364541255783	-3.30413445844955
Q9UJ70-2	NAGK	-0.0947775078123951	3.19222518011675	-2.93060771496955	0.0279006679985704	0.166480913932473	-3.30487965870255
Q8WWV3-1	RTN4IP1	0.184523717081108	3.40848704767994	2.80658429169363	0.0326555978426205	0.176817066837866	-3.3062460755983
Q9Y2Q3-1	GSTK1	0.127780251341462	2.87271894008572	2.88704328215164	0.0294790484574617	0.169792237061296	-3.30647888409072
Q8TCE6-1	FAM45A	-0.118357052526101	3.30266543542764	-2.84088415181576	0.031258134311278	0.173777106113134	-3.30704998324487
Q9BRT3	MIEN1	-0.229604224324159	2.78985821079142	-2.96003907369419	0.026886600154256	0.164492820082498	-3.30827073769071
P56182	RRP1	0.0961774706372285	3.39029269118835	3.06989714489764	0.0234425215020652	0.154321990420684	-3.308393715817
Q8WUX2	CHAC2	-0.104139209856353	3.09455876139921	-2.78329467124574	0.0336430221234253	0.179653000650882	-3.31012752275337
P06576	ATP5B	0.159193565915363	3.36066653807501	3.59328984296526	0.0125115374060555	0.122851393877235	-3.31212582515875
O00743	PPP6C	-0.0902565044181346	3.30129486632485	-2.89061498578999	0.0293460501771668	0.169535313975319	-3.31282323544029
Q7Z3T8	ZFYVE16	-0.0621127479392715	3.22872689224429	-3.07718053875964	0.0232319080107016	0.154316188968054	-3.31478194671572
Q99543-1	DNAJC2	-0.0789703525667964	3.31869112296069	-3.06990046449161	0.0234424250337059	0.154321990420684	-3.31657424635413
Q15147-4	PLCB4	0.0940445894978185	3.38036606425239	2.7860723338553	0.0335235749299083	0.179603957306045	-3.31851565043788
Q15648	MED1	0.0434302313539497	3.32204366693392	3.26233554381452	0.0185188397829536	0.141369690363005	-3.31900257058341
Q13557-11	CAMK2D	-0.191970037345807	3.21159502341406	-2.75977410285954	0.0346731359893586	0.18232508520244	-3.31983257022708
Q5KSL6	DGKK	0.151720815531141	3.37245211282298	2.74765711027072	0.0352170881688847	0.183263705840972	-3.32272340321753
P26196	DDX6	-0.0471843921369145	3.35374164814599	-3.33866894804619	0.0168919459895277	0.135578989868654	-3.32487957152711
Q9H3S7	PTPN23	-0.0541880197242854	3.34108421805341	-3.11472034882295	0.0221788010981387	0.151282569008749	-3.32547132955855
Q14118	DAG1	0.102146902545489	3.40629602793595	3.01360522847135	0.0251427236280635	0.159813567253109	-3.3287345244602
P33993-1	MCM7	-0.0530775185759366	3.34825715325458	-3.38017716383028	0.0160741705775468	0.132078718948993	-3.33183515533835
Q5TCQ9-4	MAGI3	0.10352137510873	3.2451189611638	2.75393013452904	0.0349343388244984	0.183196341395456	-3.33415557513688
Q96K76	USP47	-0.0885492434541053	3.27708310586009	-3.22830466318159	0.0192993444795809	0.142728484407685	-3.33655948037754
P62140	PPP1CB	0.150787434476029	3.26808401446001	2.74003536535587	0.0355639621367703	0.184014136699524	-3.33782819152389
Q08AM6	VAC14	-0.078564497610116	3.31543372307987	-2.86863200364666	0.0301751079852578	0.170977421316764	-3.34102233764825
Q9Y6X3-1	MAU2	0.0886829453516226	3.36668996871834	2.77549056276084	0.0339810934280841	0.180224748397897	-3.34156290769151
Q15928	ZNF141	0.185399428921816	3.41683178761192	2.76229162071951	0.0345612642278855	0.182178442134274	-3.3422771404191
O75391	SPAG7	-0.0820950590403674	3.3477241736238	-2.96505668584735	0.0267177655355834	0.164245750952721	-3.34290674798271
Q15436	SEC23A	-0.0757321800630119	3.26685358332896	-3.03795264579878	0.0243913158437764	0.157384503913753	-3.34313379753901
P63104-1	YWHAZ	-0.109171967820419	3.31336631675119	-3.27805477618096	0.0181701425736918	0.140008407226385	-3.34395195532751
P43034	PAFAH1B1	-0.0992559125854976	3.32772464613247	-3.22471289371845	0.0193838185206233	0.142728484407685	-3.34434101414169
Q9Y250	LZTS1	0.120082912027959	3.34494283046308	2.80956830618986	0.0325313698502549	0.176817066837866	-3.34809057714416
P49327	FASN	-0.0696175599042588	3.38888930687293	-3.96590729993781	0.00821113107452208	0.105127532836146	-3.3519566132676
Q15750-1	TAB1	-0.0716297246553052	3.28640866139938	-2.8987971290761	0.0290438300826339	0.168934241390422	-3.35266931322603
Q86WJ1-1	CHD1L	-0.0827280559970891	3.28768324513092	-3.06877819479816	0.0234750633408538	0.154327922837215	-3.3534622767607
Q14241	TCEB3; ELOA	0.0848961848627223	3.39837037918737	3.07304735650281	0.0233511710251472	0.154321990420684	-3.35470832144042
Q16831	UPP1	-0.1012826009643	3.34416448023877	-2.73705945622516	0.0357003995344715	0.184014136699524	-3.3563515933515
Q05084	ICA1	-0.116743809660528	3.28925861077136	-2.74953418010761	0.0351322229276422	0.183263705840972	-3.35732186090709
Q9C0I1	MTMR12	-0.0795104583845056	3.32794033117712	-2.92475230468915	0.0281073529305946	0.166541466391045	-3.36006206988655
O94888	UBXN7	-0.0752696544460222	3.31044821679759	-3.01804230505716	0.0250039198486332	0.159581637815646	-3.3613072286237
Q9BSM1	PCGF1	0.141550661844568	3.24448967429933	2.7094992266666	0.0369911548261376	0.187344856189286	-3.36158010930228
P31930	UQCRC1	0.108478702932397	3.31957217337644	3.02511246405943	0.0247844762002457	0.158774251190686	-3.3617735798191
Q9NVK5-1	FGFR1OP2	0.0960057350581202	3.21769861898788	2.76418091414606	0.034477565523932	0.182043658283862	-3.36657014241334
Q86XA9	HEATR5A	-0.0943259346520387	3.34310057218998	-2.9538718170827	0.0270957162297464	0.164549867925337	-3.36825867255371
Q9NUJ1	ABHD10	0.130182468908332	3.28251283112786	2.8070946035687	0.0326343165608789	0.176817066837866	-3.37034048987716
Q9UKD2	MRTO4	0.0753585915423749	3.36964192908944	2.97979275847713	0.0262285792977531	0.163067796087814	-3.37039837389664
O60763-2	USO1	-0.0525491210753141	3.30303270882112	-3.31459162750978	0.0173873618544147	0.136956714730051	-3.37173534016257
Q9BX40-2	LSM14B	-0.0765663774623756	3.36186558117762	-2.8635140507036	0.0303717586939366	0.171584781075023	-3.3727448141727
Q9UK76	HN1; JPT1	-0.154409851428305	3.29205456856418	-2.92640237656239	0.028048940086538	0.166541466391045	-3.37546194429782
Q9Y697	NFS1	0.146973766495749	3.36456158823353	2.8966729211085	0.0291219639410366	0.169004317213035	-3.37659059011636
Q9Y4C1	KDM3A	-0.0772543141221391	3.21882440511831	-3.00039271010965	0.0255610652378829	0.160609739971366	-3.37764751982758
Q9BTZ2	DHRS4	0.0690365739332874	3.40493017385279	2.84109152874102	0.031249885253619	0.173777106113134	-3.37892808806011
Q13427	PPIG	0.120419817051288	3.41765721865119	2.96240531978728	0.0268068350383371	0.164437429366573	-3.37912979833634
O95163	IKBKAP; ELP1	-0.0701137769267089	3.28450545140811	-3.27068891346805	0.0183326265398414	0.140487257330937	-3.3793424390002
Q9BZE9-2	ASPSCR1	-0.0803795580263777	3.29655172653722	-2.90783741579967	0.0287138489147002	0.168162327384412	-3.38104475181236
Q13541	EIF4EBP1	-0.136695194067916	3.18423834181771	-2.70162683876113	0.0373690308606343	0.188243732608527	-3.38150947426089
Q13200	PSMD2	-0.05630809278836	3.33507093884513	-3.40765389822504	0.0155570200243111	0.130174120735159	-3.38162403864779
Q14152	EIF3A	-0.0653533124884886	3.2889473776826	-3.53067146210831	0.0134575476585061	0.125451161161676	-3.38232867782027
P09486	SPARC	0.0874328942382221	3.45731285784729	2.89811766468541	0.0290687976805053	0.168951375609724	-3.38392184417586
Q12830-1	BPTF	0.140696931895693	3.41750085311855	2.71799322774993	0.0365880585084528	0.186266479679396	-3.38422333802747
Q9HAU0-6	PLEKHA5	0.0546475130756306	3.44582342846213	3.18053851605844	0.0204567817377839	0.145859135215872	-3.38527813563419
P04818	TYMS	-0.0813011363377091	3.1682541817658	-2.80543018934194	0.032703782304866	0.176817066837866	-3.38570377909373
Q8WZA0-2	LZIC	-0.142287317680859	3.19131614539652	-2.70055122478558	0.0374209828766527	0.188291762489194	-3.38645339614351
P24386-1	CHM	-0.0935430937089537	3.33094037409999	-2.88220305122373	0.0296603303529641	0.170324891068818	-3.38783537950943
Q5JPH6-2	EARS2	0.127658209481953	3.41725024896714	2.77610064805721	0.0339545326779756	0.180224748397897	-3.38845944591383
Q9UBE0-1	SAE1	-0.0837023408555475	3.26329170611994	-3.09473283636426	0.022732831074009	0.151971637646639	-3.38895649047944
P10074	ZBTB48	0.146398289240823	3.3651720135225	2.68220445544852	0.0383192214643603	0.189559260751395	-3.38917605938631
O95372	LYPLA2	-0.112082017051692	3.3484733843899	-2.89942584184052	0.0290207482036847	0.168934241390422	-3.38966021799643
P46063	RECQL	-0.056607162673468	3.25340773479511	-3.18939095735997	0.0202366241841512	0.145126381764755	-3.38988668935271
Q92888-3	ARHGEF1	-0.0584922546452231	3.29383701421943	-3.03202710973181	0.0245718975913665	0.15768952073351	-3.39024992400684
Q8N3P4-1	VPS8	-0.100337315760736	3.30128118852034	-2.80560912201275	0.0326963067133049	0.176817066837866	-3.3928880963884
Q14141-1	SEPT6	-0.111442755446311	2.89486270153691	-2.73195793479612	0.0359356076695205	0.184210552368299	-3.39448571321745
Q96C86	DCPS	-0.10017070876292	3.12501246316557	-2.86955383838922	0.0301398350421848	0.170977421316764	-3.39479039473128
Q92600-2	RQCD1; CNOT9	-0.0769979407652093	3.35547030622354	-2.80928951546114	0.0325429545052225	0.176817066837866	-3.39512961189351
Q96C19	EFHD2	0.0789505089678748	3.33550647973435	2.78210250307651	0.0336944299368589	0.179653000650882	-3.39612215763969
Q8NB50-1	ZFP62	0.186121406661513	3.42157868962239	2.75131303287033	0.0350520022070962	0.183263705840972	-3.39649329504448
O75616-1	ERAL1	0.138361054766796	3.41407740056789	2.90094372561096	0.0289651045523175	0.168934241390422	-3.39790196639633
Q13155	AIMP2	-0.064736341566141	3.30836642160701	-2.97787858091592	0.026291566664338	0.163123802029753	-3.40027019106086
P51812	RPS6KA3	-0.103887543949196	3.03334813840884	-2.727799363605	0.0361285787735824	0.184785637567283	-3.40101476558514
O00515	LAD1	0.0867869452590833	3.4775117803199	2.85590664126896	0.0306666426607676	0.172362258236929	-3.40165915903983
Q53F19	C17orf85; NCBP3	0.0660067050371209	3.29544798557809	2.8496144880185	0.0309128951680445	0.173037790388982	-3.40352798957628
Q8WWQ0	PHIP	0.113956780004546	3.42826929687425	3.16324238528413	0.0208945845112542	0.147492451513827	-3.40429971694423
Q9H6V9-2	C2orf43; LDAH	0.0803921917831028	3.41871183627422	2.85713284125742	0.0306189021820369	0.172346454541883	-3.40723488774024
P0CAP2-1	POLR2M	-0.103844210528192	3.36744672825589	-2.67967594459295	0.0384448247998104	0.189921890446971	-3.40738876410545
Q9Y3S2	ZNF330	-0.110772541549678	3.28642461362261	-2.70491774003702	0.0372105630905544	0.187763150776606	-3.40806997931776
Q9NQC3	RTN4	0.0469040410276877	3.44658415017385	3.092042262059	0.0228085642885024	0.152113389327753	-3.41159697793285
O75179-1	ANKRD17	-0.0581643346254218	3.3413900288773	-3.12917197973124	0.0217874638286684	0.150182769535978	-3.41341709477946
O43776	NARS	-0.0709257072687171	3.35791482069699	-3.10340131246161	0.0224907061401562	0.15156856490951	-3.4134958896247
P25098	ADRBK1; GRK2	-0.0965954263784041	3.16811098575725	-2.74978357957134	0.0351209638367998	0.183263705840972	-3.41356234674288
Q96BU1-1	S100PBP	0.137436170681831	3.32492727001218	2.68526138281052	0.0381679589499646	0.189407879084171	-3.41444835194565
P62191	PSMC1	-0.0640722799307191	3.34398544331264	-3.21986968532273	0.0194983715006507	0.142728484407685	-3.41522769805662
Q96JG8-4	MAGED4B; MAGED4	-0.0706162159577253	3.39648732860174	-2.91896134622085	0.0283134056556933	0.1672212842113	-3.41578699426128
Q96QE5	TEFM	0.183035361668802	3.36497054236818	2.65741872401161	0.0395697614539371	0.19368672505149	-3.41694493851316
Q92777-1	SYN2	-0.14166523116385	3.22799373518535	-2.65292372707242	0.0398012193565584	0.19368672505149	-3.41862387043559
P45974-1	USP5	-0.0949531797954951	3.21664729324617	-3.03507347381112	0.0244788768761682	0.157684251380321	-3.42038685666285
Q8TDB6-1	DTX3L	-0.135178926838444	3.35404149629981	-2.6477382288334	0.0400700423688238	0.194199219869625	-3.42405765069619
Q96HI0	SENP5	0.0887269517256917	3.2928866007523	2.74857060459172	0.0351757600284964	0.183263705840972	-3.42474323955157
Q96CP2	FLYWCH2	-0.198833322053263	3.00988701790167	-2.64502048692735	0.0402117125588097	0.194517187106676	-3.42725643781046
O60287	URB1	0.111318460974442	3.34177741009628	3.17577675293691	0.0205762957711992	0.146188927758839	-3.4307149713649
P60228	EIF3E	-0.0568258252964549	3.3138432865573	-3.16806762644105	0.0207714184452843	0.147009522428248	-3.43407702084723
P49411	TUFM	0.157249785758372	3.37654227434287	3.24792951071719	0.0188449078842606	0.1422866960775	-3.43583694347565
Q5SQI0-1	ATAT1	-0.107615933536851	3.25448879676714	-2.64968734695276	0.0399687692951337	0.193952122935285	-3.4361169595123
Q8NFA0	USP32	-0.0762722229393532	3.36126186940499	-2.81052857459052	0.0324915018099076	0.176817066837866	-3.43612671844756
O60488-1	ACSL4	0.0634160059838415	3.44677451460725	3.20846716206693	0.0197710273062007	0.143367978727005	-3.43770858390639
Q04206	RELA	-0.131048940322664	2.841461021262	-2.70836166706206	0.0370455022557306	0.187352072054031	-3.43869052903795
Q9NQV6-6	PRDM10	0.15656397547179	3.378287913735	2.66489910007148	0.0391877822651935	0.192847123501324	-3.44045468141373
Q8TEW0-11	PARD3	0.0896608564314955	3.41800662827192	2.6904322316999	0.0379135577454187	0.188909866873645	-3.44071848362069
P47756-2	CAPZB	0.047402973983923	3.34478031877153	3.1620441962855	0.0209252932024926	0.147492451513827	-3.44084407134192
O60934	NBN	0.0525430953022382	3.31780597239308	3.03168185358128	0.0245824643896348	0.15768952073351	-3.44084717000953
Q9H074	PAIP1	-0.06952239223984	3.37094462665316	-2.81085357434756	0.0324780206015044	0.176817066837866	-3.44100507534927
Q9UK45	LSM7	-0.13861785983365	3.30705271953896	-2.68779699124317	0.0380429802293772	0.188909866873645	-3.44196719227156
Q15785	TOMM34	-0.0711123636031786	3.29091484358073	-2.8275537781384	0.0317933840321174	0.175644963145791	-3.44374433655053
Q9Y508-1	RNF114	-0.0912711656825641	3.32290511519387	-2.7901526327642	0.033348942851271	0.17904344965357	-3.44377095802206
P68366	TUBA4A	-0.110694415566772	3.19009612389497	-2.65164507637115	0.0398673257027219	0.193706220893782	-3.44413309450996
Q4G176	ACSF3	0.159838645765886	3.26814172854323	2.65520235334262	0.0396837061549994	0.19368672505149	-3.44450364725268
O15504	NUPL2	0.107869141520171	3.34598591479149	2.74395123679398	0.0353852876812855	0.183553703239231	-3.44494718877326
Q7L266	ASRGL1	-0.113762712817415	3.05316181434308	-2.69864087636218	0.037513444503812	0.188361790336749	-3.44551223233295
P53004	BLVRA	-0.111450269396053	3.15526485005902	-2.74805726371293	0.035198978045377	0.183263705840972	-3.44799840417659
O96017-9	CHEK2	-0.0779796466060703	3.33000079930517	-2.87478435498222	0.029940542473583	0.170703620147178	-3.44808510433713
Q9UN36-1	NDRG2	-0.0902713009458845	3.24114799572181	-2.69575133670975	0.0376537676404251	0.188498451285372	-3.44985092997403
P45984-1	MAPK9	-0.111530418397098	3.1989693623015	-2.74728732347323	0.0352338329138991	0.183263705840972	-3.45005750011764
O15013	ARHGEF10	-0.0828376300526111	3.40102734392986	-2.96104616230359	0.026852620003976	0.164437429366573	-3.45021238669703
Q96BP2	CHCHD1	0.144315710920957	3.42955914920916	2.62378268844781	0.0413375031333536	0.197010255216405	-3.45021485700384
Q9Y2R9	MRPS7	0.179099155132081	3.38187057438327	2.84937882350139	0.0309221598831197	0.173037790388982	-3.4506458164293
P21953	BCKDHB	0.210725244581464	3.33068543302221	2.62386634088146	0.0413330029974413	0.197010255216405	-3.45147949452694
P54132	BLM	0.124013769262845	3.36929985459836	3.15461020509271	0.0211169347658592	0.147969532323034	-3.45216125421812
Q8IUC4	RHPN2	-0.0853252954082913	3.42591635767526	-2.83819996485589	0.0313651197786435	0.174150970286525	-3.45232819136669
O60942-1	RNGTT	-0.0762520896479484	3.26250198134118	-2.84748255946525	0.0309968178799267	0.173202903696138	-3.45570818638796
Q8N0Z6	TTC5	-0.0953596130151229	3.24667659115962	-2.69119449849422	0.0378762096513224	0.188909866873645	-3.45627249767429
P05455	SSB	-0.0917174057547095	3.30414831621908	-3.39271251872111	0.0158359088996498	0.130740474007642	-3.4567347516163
Q9BZF3-5	OSBPL6	-0.101042140524019	2.97502936727386	-2.64920554804363	0.0399937771746117	0.193952122935285	-3.45863915857878
P46379-3	BAG6	-0.0680767551168091	3.31137810892575	-3.04961991574168	0.024039988844518	0.155904306352614	-3.45869056300987
Q9BQE9-1	BCL7B	0.124450080980052	3.39797414466692	2.61334452023694	0.0419031782579399	0.197497465755599	-3.45906601982661
Q8WVM7	STAG1	0.0767636599818719	3.30342791175346	2.8885197023225	0.0294239921387679	0.169611360020307	-3.45946562280364
Q92947-1	GCDH	0.165051396562746	3.41258868062554	2.71567771315815	0.036697472957208	0.186667429580058	-3.45997009049984
Q16763	UBE2S	-0.107772845681993	3.29397777628301	-2.73462843560109	0.0358122748751915	0.184026639546195	-3.46018276177588
Q5T6F2	UBAP2	-0.0782583496351047	3.37308731790839	-3.06755548568705	0.0235106794158265	0.154429736710806	-3.46036610914014
Q06945	SOX4	0.110556895493088	3.39411320355485	2.62271936344204	0.0413947512263876	0.197010255216405	-3.46367311655091
Q969K3-2	RNF34	-0.0987386593877872	3.32158868825374	-2.62885098725313	0.0410657977091166	0.196467396552836	-3.46432700171511
Q9NP73-1	ALG13	-0.082948395646581	3.39534167779477	-2.80030360588736	0.0329187536876087	0.177449698623109	-3.46459120463647
Q9ULP9	TBC1D24	-0.0844917556839141	3.20806980175171	-2.70462394152789	0.0372246809607948	0.187763150776606	-3.46904714815752
Q9NYW8	RBAK	0.215805354995256	3.34232601974657	2.69489766761971	0.0376953320846246	0.188498451285372	-3.47098842428186
Q9HA64	FN3KRP	-0.131120639704751	3.11949753905845	-2.60813369659284	0.0421886705681967	0.198449712200616	-3.4727766967752
O15382	BCAT2	0.139522860056747	3.27385540339927	2.74883796973032	0.035163673863337	0.183263705840972	-3.47351152411771
Q9Y3P9	RABGAP1	-0.0812029991365383	3.22517197925888	-2.98553666932334	0.0260405597176504	0.162393373823414	-3.47414269805294
Q7L3T8	PARS2	0.10663413112747	3.35733667624598	2.70783591582324	0.0370706493537413	0.187355745613902	-3.47500028859615
O15020	SPTBN2	0.0976367203906925	3.32371280419627	3.12006535719631	0.0220331698683001	0.151015167584005	-3.4766145666628
A1L170-2	C1orf226	0.105075559911111	3.46839991397258	2.61823045196228	0.041637368075792	0.197186350541652	-3.47693547449012
P18583-3	SON	0.162276980506252	3.43811489352254	2.5948047713453	0.0429284727115092	0.200752113878242	-3.47831397110186
Q9Y263	PLAA	-0.0839025383508613	3.36670175720985	-3.11289018681963	0.0222289089295918	0.151282569008749	-3.47999826498603
Q13415	ORC1	0.114710311773319	3.40665881229689	2.68965076284275	0.0379518878600393	0.188909866873645	-3.48148863405297
Q8NEC7-1	GSTCD	-0.105767237591526	3.28521818679917	-2.77552279148451	0.0339796897518432	0.180224748397897	-3.48218839171843
Q9Y6Y8	SEC23IP	-0.0863032333441049	3.28570085642216	-3.15229246000892	0.021177078531112	0.147969532323034	-3.48279422142275
Q8WVK2	SNRNP27	0.136050240889317	3.27639811145224	2.68335024938546	0.0382624499149072	0.189509048255112	-3.48831157880897
Q8N806	UBR7	-0.0931649906057995	3.28053635218624	-2.81947398752689	0.032122645194474	0.176817066837866	-3.49078498522099
P39687	ANP32A	-0.199430702853045	3.20900575900039	-2.91218556207451	0.0285565928234788	0.167988157273279	-3.4916047298631
Q5HYI7	MTX3	0.0916288678817715	3.28047469640459	2.68849990019562	0.0380084123353	0.188909866873645	-3.49333754951153
Q9UHL9-3	GTF2IRD1	0.115564721864282	3.37308691878887	2.64393874200178	0.0402682513403383	0.194539479042939	-3.49689781333395
Q14703	MBTPS1	0.161595642117152	3.28365889605727	2.62147607080964	0.0414617964816069	0.197084821937353	-3.49868097601772
Q9BRF8-1	CPPED1	-0.134867224512352	3.28336502873894	-2.63253121254393	0.040869707054171	0.19597024532475	-3.5000336596395
O95865	DDAH2	-0.110130681373973	3.33000164010048	-2.7352017566437	0.0357858566157051	0.184014136699524	-3.50012953738309
Q96QE3-1	ATAD5	0.162706007121652	3.40549984872936	2.84272627004094	0.0311849410802345	0.17374790702074	-3.50039253139409
Q9H267	VPS33B	-0.0759959755945741	3.3037812116954	-2.83805817631112	0.0313707821866498	0.174150970286525	-3.5010791038242
P06400	RB1	-0.0930561822975967	3.25705756995787	-2.8761314809934	0.0298894468437342	0.170703620147178	-3.50366184442237
Q8WVV9	HNRNPLL; HNRPLL	0.0591192998741941	3.36346440718007	2.9054130451319	0.0288019387385661	0.168421092989542	-3.50435858074474
P07384	CAPN1	-0.07747208336721	3.28387529490768	-3.04806303724889	0.0240865475791162	0.15594261014935	-3.50489991281877
Q8N6M0	OTUD6B	-0.121961771337432	3.29991490560221	-2.66248485024012	0.0393106286196821	0.193080117010372	-3.50588917947016
P49418	AMPH	-0.0868730352859144	3.33048503189982	-2.70041328643936	0.0374276509118901	0.188291762489194	-3.506102691864
Q6Y7W6-1	GIGYF2	-0.0556190010127261	3.34252242534576	-2.97636730883495	0.0263414129149015	0.163123802029753	-3.50812564784308
Q8IV32	CCDC71	0.210850599957984	3.45043275545741	2.61323781888969	0.0419090034215479	0.197497465755599	-3.51030265863306
Q5FWF5-1	ESCO1	0.158993456197858	3.39762176661287	2.5622920179549	0.0447919605850512	0.204428269844445	-3.5111299399113
P11498	PC	0.157811753585137	3.36762779612187	2.85607738509718	0.030659990129998	0.172362258236929	-3.51140325567749
Q9Y305-1	ACOT9	0.152721004346947	3.44250137383861	2.76200432971838	0.0345740109159935	0.182178442134274	-3.51203095223378
Q8TDN4	CABLES1	0.150023105299019	3.226642873098	2.59218097572315	0.0430757336059649	0.20102009016117	-3.5124214833423
Q53H54	TRMT12	-0.121509755249067	3.38718063609176	-2.56619805682773	0.0445635777391418	0.204040901760751	-3.51572418133592
P62899	RPL31	-0.202372785493176	3.32382116845791	-2.95281131178375	0.0271318538745506	0.164549867925337	-3.5160285692123
Q9Y496	KIF3A	-0.0779230291130043	3.2402606971754	-2.66324984129666	0.0392716581420063	0.193012274993896	-3.51649625419125
Q6UB99	ANKRD11	0.0810141343825056	3.34976830638583	2.75229076011068	0.035007994098273	0.183263705840972	-3.5165654318617
P53999	SUB1	-0.0735824683662843	3.07253026806687	-2.85930065912122	0.0305346985598795	0.171998683811597	-3.51739520138412
Q9UIF8-1	BAZ2B	0.0753435359484441	3.33013372519752	2.69225844397999	0.0378241467450014	0.188909866873645	-3.51924818552141
P40121	CAPG	-0.153500806035835	3.42710736608775	-2.78087137561601	0.0337476070049877	0.179653000650882	-3.52246973868181
Q15057	ACAP2	-0.126948553268172	3.22473827849722	-2.71427049086364	0.0367641405233926	0.186667429580058	-3.52638868890417
Q9NWT6	HIF1AN	-0.0986383822143889	3.30257467329422	-2.63519142510751	0.0407285911383867	0.195660457867065	-3.52752489993015
Q9P2T1-1	GMPR2	-0.0912391050303872	3.30732385529679	-2.84781377655505	0.0309837633980847	0.173202903696138	-3.52951372636522
Q7Z6M1-1	RABEPK	-0.0740102133728628	3.23892651636757	-2.75550721968909	0.0348636402316219	0.183136565333679	-3.53037360827045
Q02218	OGDH	0.130950683122039	3.43833172095242	3.06030530676053	0.023723090006324	0.154896635343419	-3.53153313421823
O60684	KPNA6	0.135391959314575	3.29382224706878	2.69816027951841	0.0375367443337322	0.188361790336749	-3.53345747225363
P49247	LOC101060545; RPIA	-0.0900623924510811	3.19981665860273	-2.73921711655658	0.0356014203982371	0.184014136699524	-3.53357605715715
Q9BZ95	WHSC1L1; NSD3	0.081946682214768	3.34602085670551	2.85257606480823	0.0307967229809262	0.172840130731285	-3.5344679697846
Q9NRL2	BAZ1A	0.083426592769631	3.2037585836757	3.01505046206977	0.0250974204111607	0.159790381240187	-3.53530759737516
P40855-1	PEX19	-0.104861784279584	3.28127244693691	-2.80729591962575	0.0326259253137507	0.176817066837866	-3.53571679686772
Q5T0W9	FAM83B	-0.117202332816611	3.38641827606195	-2.554654283271	0.0452421564107556	0.20489836126524	-3.53594453756955
P16885	PLCG2	-0.0894172469572233	3.16608713696693	-2.65233280587945	0.0398317553725065	0.19368672505149	-3.53609313871039
Q86W56	PARG; BPHL	-0.06955656296677	3.30876440439385	-2.86907422943543	0.0301581811269545	0.170977421316764	-3.53680207495347
O43766-1	LIAS	0.133024042984407	3.40349751603575	2.53606568735103	0.0463581627210594	0.208188152408893	-3.53808433493066
Q96DG6	CMBL	-0.0986337896468269	3.13987297407835	-2.6641629581179	0.0392251961860676	0.192907503294558	-3.54048640967382
O95347-1	SMC2	-0.0845458034139321	3.30300933771913	-3.26915695805768	0.0183666213637812	0.140487257330937	-3.54150636254409
Q9UNM6	PSMD13	-0.0689977165694451	3.28846713426222	-3.06381557732392	0.0236199869425842	0.154762195691523	-3.54164741027255
Q9H329-2	EPB41L4B	0.0794437449447433	3.4404224664832	2.643477358887	0.0402923921010467	0.194539479042939	-3.5418686974333
Q9UK53-1	ING1	0.123943977616553	3.3963641859815	2.5307408924266	0.0466832376342231	0.208320165385684	-3.54340036172826
O43181	NDUFS4	0.178664237861869	3.40351175790112	2.55942516984044	0.0449603790556898	0.204577344821874	-3.54381898449446
Q6IQ23-2	PLEKHA7	0.0698059071086209	3.3580360351113	2.79309401496877	0.0332236663565687	0.17874612081879	-3.54414093746379
Q8NC60	NOA1	0.108181810299945	3.41461121269635	2.7851103671748	0.0335648901004201	0.179653000650882	-3.54501997414989
Q14807	KIF22	0.0813429525117301	3.35125456393517	2.92325461082992	0.0281604863948634	0.166541466391045	-3.54617860195546
Q9HBK9	AS3MT	-0.0963298535244155	3.2880186336636	-2.86659692153263	0.0302531370879921	0.171293038921827	-3.54636568314339
O75155-1	CAND2	-0.0821668452817103	3.1998617046482	-2.64282756638745	0.0403264173063382	0.194571361599678	-3.54768814116265
P48728	AMT	0.148621682394464	3.46469964095235	2.73714565964449	0.0356964393979361	0.184014136699524	-3.54877354042504
Q9BY43-2	CHMP4A	-0.107235178090677	3.2788121551521	-2.7804253234988	0.0337668961077388	0.179653000650882	-3.55309229449491
Q96HC4	PDLIM5	-0.0918050859367652	3.35144307440409	-2.89072814635633	0.0293418471446803	0.169535313975319	-3.55385355429334
P12532	CKMT1B; CKMT1A	0.0677727372505493	3.33692339974526	2.84282350516721	0.0311810827936401	0.17374790702074	-3.55495682069587
Q96MU7-1	YTHDC1	0.115129488574574	3.38347021015092	2.87854342111599	0.0297982002813158	0.170703620147178	-3.55592119221925
Q9Y223-2	GNE	-0.0915578009730783	3.19583695315928	-2.73645453806408	0.0357282024870945	0.184014136699524	-3.55611786507323
Q9Y5J7	TIMM9	0.209976048029325	3.25337127412742	2.55502255313995	0.0452203386276358	0.20489836126524	-3.55628451989628
Q9NP66	HMG20A	0.102083373912156	3.33051489977269	2.60579914210986	0.0423172528535617	0.19868908438955	-3.55699786883118
P53621-2	COPA	-0.0754514010360305	3.24495027182218	-3.35790555752421	0.0165073595768254	0.134259031570179	-3.5592140094402
Q9Y237-2	PIN4	-0.0839017594426176	3.17535626176151	-2.73589665457815	0.0357538643867724	0.184014136699524	-3.56015267549138
Q10713	PMPCA	0.139475199278065	3.37406929269719	2.89980839349213	0.0290067133925311	0.168934241390422	-3.56362846528494
Q8TDR2	STK35	0.0905215009244068	3.37223802344975	2.57380732850347	0.0441222387014095	0.202880526518307	-3.56454079567744
Q14781-1	CBX2	0.0829264607724288	3.39012515363374	2.80301607150583	0.0328048225708744	0.177238449833626	-3.56492380594693
P26885	FKBP2	0.0951990260450988	3.16071369650467	2.65221072112722	0.0398380672746678	0.19368672505149	-3.56501187954646
Q9NVN3-1	RIC8B	-0.0928452146797526	3.38406429611209	-2.56082366541097	0.0448781373364635	0.204577344821874	-3.56537454748882
P61353	RPL27	-0.0785967897721915	3.36921606043416	-3.00487865181081	0.0254181812653772	0.159973984141078	-3.56732401202948
Q9NXE8	CWC25	0.136780968072612	3.37682987332024	2.58295651195474	0.0435977681669729	0.201878978080417	-3.56987105641325
Q9Y2S7	POLDIP2	0.176621035596626	3.37022248572178	2.75152686646597	0.035042372317484	0.183263705840972	-3.57097841626491
P60981-1	DSTN	-0.0949699518241008	3.28855612136828	-2.89700456509523	0.0291097501558146	0.169004317213035	-3.57184434529502
P13489	RNH1	-0.0988192079006324	3.13235467323263	-2.69872817543194	0.0375092138283524	0.188361790336749	-3.57192798939989
Q03701	CEBPZ	0.118994248570553	3.41929349117105	3.25627742178633	0.0186551946420079	0.141846038942997	-3.57604817312775
Q9NY27	PPP4R2	-0.0501868234182593	3.31194234937313	-2.98151626286052	0.0261720072409679	0.162980226909664	-3.5766143503612
P09012	SNRPA	0.0827437901802628	3.34975570161428	2.78042752972792	0.0337668006720753	0.179653000650882	-3.57666093498362
Q86TI2-2	DPP9	-0.109865611759076	3.22756295405665	-2.64655827681463	0.0401314847942114	0.194374211705297	-3.57825950113793
P41134	ID1	-0.245749473870245	3.31981172941586	-2.73152219974823	0.0359557748845548	0.184210552368299	-3.57826710964524
Q9BVS5	TRMT61B	0.133010374728965	3.38577057872337	2.58084048372992	0.0437184719727802	0.2021748746083	-3.57973268356612
Q6PJG6-1	BRAT1	-0.0819416136906325	3.33698220826271	-2.78267334773119	0.0336698037816984	0.179653000650882	-3.58184640751553
Q9H4K7	GTPBP5; MTG2	0.131205811134715	3.4063719021453	2.64603376684157	0.0401588295639542	0.19438393717013	-3.58225713602343
Q9NSB8	HOMER2	0.0933734624705275	3.28588967550044	2.57964919626318	0.0437865834922211	0.20236787262188	-3.58258030981999
Q9HAJ7	SAP30L	0.132172680614615	3.38790595525454	2.49550609674831	0.0488965088228672	0.212661006626438	-3.58304971572189
Q99959-2	PKP2	0.0622296235640997	3.2697411254025	2.87809119599544	0.0298152853869734	0.170703620147178	-3.58396720498671
P14868	DARS	-0.0703090829130102	3.28633959699537	-3.13771944189028	0.0215595830987046	0.149425089004382	-3.58744608265581
O75131	CPNE3	-0.0911276318587509	3.19342341007706	-2.74794752109506	0.0352039437690961	0.183263705840972	-3.58798434708234
O94966-6	USP19	-0.0717536400326939	3.26872789114312	-2.82549907460113	0.0318767670051218	0.17594140752755	-3.59022851194204
Q9UJY5-6	GGA1	-0.107316138974114	3.19727811077836	-2.53426264805708	0.0464679656113198	0.208188152408893	-3.59190848722695
Q9H7Z7	PTGES2	0.0651468498098557	3.35376138153701	2.73125562591204	0.0359681188018395	0.184210552368299	-3.59398610274234
P48047	ATP5O	0.141741676280681	3.42298003404188	2.83626517519313	0.0314424825703455	0.174296767543129	-3.59411822119699
P54802	NAGLU	0.0886103922675116	3.32618168472852	2.61991719829175	0.0415460242611694	0.197186350541652	-3.59415646956192
O95785-3	WIZ	0.109149040714786	3.42088067140588	2.48680285875969	0.0494602422352012	0.213531650510968	-3.59623345235516
Q8IV38	ANKMY2	-0.070301587633413	3.33005071663759	-2.72673122944644	0.0361783240331572	0.184916790128169	-3.59679307496988
Q14019	COTL1	-0.165580603782366	3.34901845661213	-2.63899010335039	0.0405279896505396	0.19512796039354	-3.59720639945425
P49189	ALDH9A1	-0.0522161608191687	3.28674800202757	-2.92445334183609	0.0281179504544202	0.166541466391045	-3.59805195824193
Q15555	MAPRE2	-0.0911512577106621	3.33740638829199	-2.66195323426279	0.039337734910284	0.193089636744529	-3.59821291819695
Q9Y375	NDUFAF1	0.15798610762514	3.35426106223675	2.57810739323415	0.0438749043220492	0.202496566124439	-3.59948767767199
Q9NPD3	EXOSC4	0.106255633374409	3.3396853378478	2.61649653196373	0.0417314911710395	0.197340132454067	-3.59978648962498
Q9NQZ6-1	ZC4H2	-0.0733548627428902	3.39996156748553	-2.60750324674631	0.0422233530605795	0.198491154828901	-3.59997527100171
O75368	SH3BGRL	-0.128866271468322	3.26881708571003	-2.612542032275	0.0419470099161075	0.197555224110728	-3.60071075721362
Q8TEX9-1	IPO4	-0.0682347133946112	3.3035433905258	-2.89214588225231	0.0292892448082384	0.169462357593368	-3.60146223825484
P46199	MTIF2	0.139870001592701	3.32376720770531	2.62818426601787	0.0411014300661238	0.196467396552836	-3.60151954513103
P04632	CAPNS1	-0.0801668648620949	3.20843879549982	-2.61391471102823	0.041872064458771	0.197497465755599	-3.60214247196637
Q5HYK3-1	COQ5	0.159861920746643	3.36125615499763	2.52628184191355	0.046957330970323	0.208928946933333	-3.60340240159738
P28066-1	PSMA5	-0.0409259685329565	3.30076289884737	-3.05863073459958	0.0237724490404658	0.155086929454468	-3.60492249466972
O95363	FARS2	0.131634163291578	3.42245225171278	2.67130613893729	0.0388637655966688	0.191621342967637	-3.60524372119351
Q13542	EIF4EBP2	-0.192437508453177	3.29183047619538	-2.46911835749092	0.0506271258793479	0.215045932637805	-3.60587849350807
Q6ZN30	BNC2	0.17050622705321	3.46307677725624	2.47561991110179	0.0501947642836139	0.215016321375704	-3.60588148232448
Q99798	ACO2	0.162744462405095	3.318290114198	2.99645437503686	0.0256872315515208	0.160875461602668	-3.60601331534378
Q9NWZ5-1	UCKL1	-0.0926750624714139	3.28914681857979	-2.61510040978889	0.0418074433407273	0.197382587883114	-3.60746256770041
P10586-1	PTPRF	0.0725456171566432	3.3855215433462	2.95326980372695	0.0271162239089002	0.164549867925337	-3.6085042828809
Q92734-1	TFG	-0.0888597786719467	3.24611940444138	-2.79801433092793	0.0330152433303358	0.177749436372166	-3.61101025900224
Q9NVD7	PARVA	-0.0965363043607084	3.36902812537794	-2.6435177505897	0.0402902780814447	0.194539479042939	-3.6137532484016
Q504Q3	PAN2	-0.082746998238029	3.29302141153261	-2.55779718177375	0.045056319603985	0.204577344821874	-3.61540184055121
Q15645	TRIP13	-0.0762635121552009	3.16637395082399	-2.69098302475642	0.0378865670632039	0.188909866873645	-3.61611443979944
Q53LP3	SOWAHC	-0.112752825277144	3.35727543053884	-2.51171845289069	0.047864550111274	0.210680911333158	-3.61658347741318
Q9Y3D9	MRPS23	0.112618051164916	3.41306342350828	2.61168568481812	0.0419938376077797	0.197654430752691	-3.61944127670974
Q9Y230	RUVBL2	-0.0338767834664993	3.32321972787838	-3.13601539871429	0.0216048039375037	0.149460825796689	-3.62101330971411
Q9UDY4	DNAJB4	-0.111794244995186	3.1569767251511	-2.49596353033346	0.0488670693623932	0.212653520220239	-3.62144358906805
Q15019-2	SEPT2	-0.0704124410967349	3.31732045439266	-2.96549602617364	0.0267030376585242	0.164245750952721	-3.62202580653175
O94842	TOX4	0.10106893526314	3.35637444819839	2.58377308632659	0.0435512840722786	0.201878978080417	-3.62249529667664
P21926	CD9	-0.198087172162936	3.23441465498144	-2.47384680339788	0.0503122875722474	0.215045932637805	-3.62262672951857
O14965	AURKA	-0.0977106532269633	3.35139816915671	-2.5506887109008	0.04547780687563	0.205722720725138	-3.62392376665192
P35269	GTF2F1	-0.100500493293121	3.35950551691531	-2.81262165680451	0.0324047855277009	0.176817066837866	-3.62393034243481
P30048	PRDX3	0.183180210799318	3.3524158223798	2.97383809323219	0.0264250651510649	0.163324492318444	-3.62458818963783
P21266	GSTM3	-0.224383931046756	1.98953569778907	-2.58288468381418	0.0436018595775876	0.201878978080417	-3.6246068363212
Q9BXW9-1	FANCD2	-0.0592801892006874	3.32724777286065	-2.89564470733626	0.0291598664791652	0.169007928064913	-3.6247238895732
P08579	SNRPB2	0.0893767861090282	3.31504194891656	2.59504003663415	0.0429152947889041	0.200752113878242	-3.62726204850027
Q8IYB8	SUPV3L1	0.14027134201015	3.36953334022725	2.79988343383241	0.032936440411797	0.177449698623109	-3.62784084187319
P46781	RPS9	-0.0833388533450457	3.32854229354149	-2.99657167343032	0.0256834640197588	0.160875461602668	-3.62900058752031
Q6IBS0	TWF2	-0.100821237952699	3.26161732716844	-2.6756868943834	0.0386438824136091	0.190659720821356	-3.63014924323734
Q9HA92	RSAD1	0.163318462429594	3.35303581210094	2.46719806734234	0.0507555834985279	0.215045932637805	-3.63019348658253
Q9Y6D5	ARFGEF2	-0.068222204734278	3.1703734232346	-2.76997076425801	0.0342224287235672	0.181072050460143	-3.63102750464965
Q06455-3	RUNX1T1	0.109535397839939	3.38051402698477	2.44477776954816	0.0522812681015698	0.218108694331291	-3.63176506874197
P31689-1	DNAJA1	-0.0633197910907343	3.33646630428395	-3.11381094674221	0.0222036839994933	0.151282569008749	-3.63336013968277
P07814	EPRS	-0.0696129970563589	3.29404983901178	-3.47612499469663	0.0143468541440034	0.128860838568137	-3.63532490652685
P35227	PCGF2	0.0929208882150614	3.39671642661452	2.68811502287544	0.0380273357687676	0.188909866873645	-3.63617716152918
P32780	GTF2H1	0.0575508060211177	3.35191703217844	2.78708848076134	0.0334799925984761	0.179495809374918	-3.63663674477013
Q8WV22	NSMCE1	0.125844833745076	3.25793019675271	2.50543787952761	0.0482615450953335	0.211367780012501	-3.63864078674023
P16455	MGMT	-0.10395082268943	3.36930472132162	-2.51316168697437	0.0477738159406711	0.210644089595879	-3.63954448626214
Q96HQ2-1	CDKN2AIPNL	0.115472284851206	3.39932877030291	2.51960006627785	0.0473712713794745	0.209782585473873	-3.64006121972685
Q9NRY4	ARHGAP35	-0.0657760712957328	3.372405624752	-3.01796643515025	0.0250062862044634	0.159581637815646	-3.64082307584483
P29374-1	ARID4A	0.101300852621967	3.35921045743449	2.65642248524206	0.0396209349872894	0.19368672505149	-3.64087667274774
Q9H8M1	COQ10B	0.154441233399925	3.36636653807143	2.43241957250729	0.053142973530769	0.220071926007117	-3.64150151599082
Q92769	HDAC2	0.0453563962578922	3.39801169020269	2.94169840836765	0.0275137157056298	0.165427293803756	-3.641750997191
Q9UJC3	HOOK1	-0.0695683759247878	3.29100375467435	-2.86882310468995	0.0301677920376952	0.170977421316764	-3.64193706426111
Q12931	TRAP1	0.148077473392376	3.37982333255366	3.10624209362145	0.0224119757388641	0.15156856490951	-3.64390852159906
P31948-2	STIP1	-0.0856309455412203	3.24608629364819	-3.40982548345476	0.0155169418375191	0.130174120735159	-3.64434879622086
P35080-2	PFN2	-0.0952301766306936	3.32436909046279	-2.51844083390676	0.0474434818708889	0.209790428192196	-3.6446283472348
Q6P161	MRPL54	0.145909713820935	3.38837544931662	2.42932609989832	0.0533610213273849	0.220122704850855	-3.64573925829967
Q2NL82	TSR1	-0.0606135360418704	3.3322755477163	-2.92307857645482	0.02816673872839	0.166541466391045	-3.64608181091462
P17036-1	ZNF3	0.136566816746205	3.42632822592572	2.51439173632527	0.0476966291116106	0.210496952329988	-3.64699872869952
Q7Z3B4	NUP54	0.0592752734501857	3.35839007564841	2.95419649390418	0.0270846630913946	0.164549867925337	-3.64762981971695
P02649	APOE	0.0651795516790611	3.45092930478611	2.82738650361973	0.0318001634266819	0.175644963145791	-3.65059470500948
Q9BPX6-3	MICU1	0.0840582033811935	3.34357969403926	2.62895325243247	0.0410603351666921	0.196467396552836	-3.65205896827097
Q5JRX3	PITRM1	0.153872631111315	3.20915699810432	2.85148538532183	0.0308394512111873	0.172953413517711	-3.65345053228173
Q8NDF8-5	PAPD5	0.0916677659205735	3.39906537522319	2.62558180126211	0.0412408345763054	0.197010255216405	-3.65583384125022
Q16514	TAF12	0.114494090756523	3.27606400209065	2.44141979634931	0.0525139348885738	0.218565794016857	-3.65588043790229
Q12955-4	ANK3	0.0609332585841861	3.41243499190078	3.0392230823968	0.0243527886343507	0.157268177106682	-3.65606437518696
Q9Y5A9-1	YTHDF2	-0.0678902687704454	3.33277394641775	-2.93435670178475	0.0277692064341656	0.166311750010085	-3.65707934062476
Q9UK99	FBXO3	-0.077344661294366	3.12484184402568	-2.56746257547038	0.0444899094825804	0.203898796625064	-3.65776598352464
Q96BD5-3	PHF21A	0.111158970462041	3.36737199181516	2.52710546464886	0.0469065747186078	0.208874508195148	-3.6585553463642
Q9NVV9-1	THAP1	0.113785289239363	3.37955470968106	2.43380876400686	0.0530453618602996	0.220071926007117	-3.65909300506735
Q9Y6Q1	CAPN6	0.106175253206926	3.47859816422358	2.55953252072803	0.0449540603361385	0.204577344821874	-3.65911873039868
Q9H0V1	TMEM168	0.144420271816514	2.9731085136869	2.41739783282758	0.0542107175116756	0.221225864228498	-3.6591672887692
O60281-1	ZNF292	0.141348693638172	3.40510148246237	2.73236017972659	0.0359170013272547	0.184210552368299	-3.6592102921482
P51825-2	AFF1	0.107978443235585	3.32553236609105	2.43045993531262	0.0532809914580271	0.220077975055251	-3.66108237358398
P60510	PPP4C	-0.11581777125539	3.32230643505432	-2.59033247801554	0.043179805679734	0.201330724789291	-3.66441580720748
Q9NS18-2	GLRX2	0.134404187906284	3.29224966857772	2.43245860185002	0.0531402285324331	0.220071926007117	-3.66549762297285
Q96SU4	OSBPL9	-0.0554791580510672	3.30962798705312	-2.73773442355065	0.0356694046004945	0.184014136699524	-3.66566398476876
Q86V25	VASH2	-0.189065844598181	3.44670119582371	-2.49008761542047	0.0492466707809171	0.213337356426424	-3.66580070911387
Q9NUQ9	FAM49B	-0.081575589214804	3.0373863745239	-2.6067523068923	0.0422647038838099	0.198563875196932	-3.66780040092904
Q96NE9-1	FRMD6	0.196589810101378	3.30960445475976	2.52495677687651	0.0470391119029508	0.208928946933333	-3.66797222832751
Q5TH69	KIAA1244; ARFGEF3	-0.0597720588007867	3.35839235645398	-2.69518694301887	0.0376812419676425	0.188498451285372	-3.66951594564424
Q96SB3	PPP1R9B	0.0922801151440901	3.10147888646524	2.4821317284684	0.0497656530023678	0.214216296964314	-3.67107708341782
Q9H9Y4	GPN2	-0.156199634208912	3.23890374103745	-2.47632311250066	0.0501482362742781	0.215016321375704	-3.67145372932024
P17020	ZNF16	0.168786990061367	3.3754103337004	2.46356387420626	0.050999641343471	0.215045932637805	-3.67183594868372
Q14693-7	LPIN1	0.139446815328877	2.71624802255809	2.39866610547756	0.0555740829640701	0.224638758956979	-3.67470488445726
O95208-1	EPN2	0.113049492911711	3.31496901758448	2.53177039106613	0.0466201982790033	0.208320165385684	-3.67510861696399
Q14847	LASP1	-0.130053656260885	3.33363074217049	-2.9359489181295	0.0277135784674327	0.166262783483804	-3.67564417100278
Q13905-3	RAPGEF1	-0.108979099542616	3.31015936776756	-2.50645352747719	0.0481971089266842	0.211367780012501	-3.67621480389111
O00410-3	IPO5	-0.0619645218857157	3.33052482114137	-3.31102598912755	0.017462086489872	0.137193440503297	-3.67846645810097
P04637	TP53	0.30842868111914	1.716677720267	2.5327592579823	0.0465597324597266	0.208320165385684	-3.67870069661849
Q7Z7H8-2	MRPL10	0.173706389791016	3.34718825473777	2.40929616271145	0.0547959928927383	0.222609140372962	-3.67908444673849
Q96I59	NARS2	0.145890824393426	3.40495988306552	2.57732134106704	0.0439200059998783	0.202496566124439	-3.67964003382657
O00159-1	MYO1C	0.0767596939709023	3.35216168313118	2.86051100497515	0.0304877951281548	0.171987032517061	-3.68250609104598
Q16762	TST	0.142921585379565	3.31812523388056	2.52801369399168	0.0468506723834224	0.208854362885309	-3.68388381947053
Q02446	SP4	0.090110622543794	3.41651219901261	2.46679997949986	0.0507822568612473	0.215045932637805	-3.68389924090589
Q9HAV0	GNB4	0.123319452209551	3.38165959795548	2.42733177127202	0.053502096906991	0.220246251813672	-3.68560946613819
O15525	MAFG	0.121817130710278	3.29004791411767	2.42377045166499	0.0537550027286969	0.220775364525997	-3.68591362269672
P56556	NDUFA6	0.0972786667167547	3.39330690493777	2.52705565594427	0.0469096425469553	0.208874508195148	-3.68735388923121
P53992	SEC24C	-0.0645344657666557	3.24209064234549	-2.90926228803449	0.0286622129654226	0.167988157273279	-3.68788019704749
Q92696	RABGGTA	-0.0758547760139871	3.17190416690363	-2.58399108913801	0.0435388830789281	0.201878978080417	-3.68793975700182
Q8NFH3	NUP43	0.0907529878043494	3.32895293600342	2.65089677377292	0.0399060677545323	0.193771741653653	-3.68968059377852
P36969	GPX4	-0.0887440179776108	3.25632998445735	-2.71506521649795	0.0367264741204604	0.186667429580058	-3.69036144916507
Q05DH4	FAM160A1	-0.136185960678573	3.36546780356578	-2.38827072028818	0.0563463020841986	0.225974296701501	-3.69233072460364
P08559-4	PDHA1	0.147532223874284	3.38368908608843	2.78943031900946	0.0333797851326564	0.179083714362056	-3.69361902356795
P17174	GOT1	-0.114116151423913	3.14554590736451	-2.81299192848908	0.0323894713337203	0.176817066837866	-3.69421422009346
Q13472-1	TOP3A	0.0703235177897317	3.29202288448571	2.63147910922087	0.0409256626449758	0.196115979895225	-3.6949387146919
Q8NCE2-1	MTMR14	-0.0879408976398514	3.30426222344031	-2.46334253138733	0.051014546063713	0.215045932637805	-3.69515926630061
P78318	IGBP1	-0.120868007315361	3.29044114534098	-2.5498078230208	0.0455303306415092	0.205838949134743	-3.69733680114689
Q6ZT12-4	UBR3	-0.143772118085265	3.34128885928558	-2.57357740494692	0.0441355055733909	0.202880526518307	-3.69813782279834
P62249	RPS16	-0.0863588343486967	3.3683431876983	-2.86935003033338	0.0301476296599816	0.170977421316764	-3.69879933952642
Q9BR77-1	CCDC77	0.121154503995253	3.36064038024451	2.47046744394547	0.0505370855258064	0.215045932637805	-3.69980153915166
Q05639	EEF1A2	-0.114838986528011	2.28689060224167	-2.50120883631449	0.0485308382650342	0.211670603279899	-3.70057962658598
Q8N9T8	KRI1	0.15754374083034	3.3152943928431	2.73533425245899	0.0357797542897972	0.184014136699524	-3.70119230130728
Q6P158-1	DHX57	-0.062993094022227	3.34985549050188	-2.7691043725121	0.0342604770133456	0.181148435317979	-3.70296929064777
Q9HC38-2	GLOD4	-0.10757790641497	3.1945793134462	-2.94980701296436	0.0272345139153353	0.164781696181745	-3.70321768148453
P42025	ACTR1B	-0.122972923513478	3.25111560228355	-2.36792309166778	0.0578908141083198	0.228937281360324	-3.70433269746738
Q5TDH0-3	DDI2	-0.0683230309478045	3.28631324391591	-2.68872064059074	0.0379975636725903	0.188909866873645	-3.70464273059689
Q7L1T6	CYB5R4	-0.107214827769592	3.13883067909283	-2.37524479793639	0.0573299655591046	0.22765812410427	-3.7049633604925
Q9H6R0-1	DHX33	0.0668320504002889	3.38862074327648	2.74230728792901	0.0354601798310634	0.183817905178323	-3.70521775922933
Q9NX55-2	HYPK	-0.117871360695485	3.32123907693561	-2.46466228048755	0.0509257455791874	0.215045932637805	-3.70596558730211
Q9ULT8	HECTD1	-0.0557907432971365	3.33704764147168	-3.09594569567058	0.0226987823167105	0.151971637646639	-3.71005324777703
Q6P2Q9	PRPF8	0.0781415469871463	3.35145772199954	3.4390869421595	0.0149879328148317	0.128968217412804	-3.71324771743549
Q15031	LARS2	0.149121492192117	3.40221449402035	2.74419000303601	0.0353744246080278	0.183553703239231	-3.71499189135596
P04066	FUCA1	0.101254588540261	3.04795345847223	2.44228022929346	0.0524542128584752	0.218473789929545	-3.7151888143734
P51003	PAPOLA	-0.114613072468186	3.31770313748379	-2.75524915390931	0.0348751983775424	0.183136565333679	-3.71571272820945
Q07812-2	BAX	-0.0904572025271158	3.30851645753335	-2.63795036190276	0.0405827908543206	0.195204496197083	-3.7157764493705
P09455-1	RBP1	-0.115896629827923	3.26848597555099	-2.53949021279101	0.0461503751864706	0.207785022553171	-3.71752810450261
O95747	OXSR1	-0.07747505666092	3.29864356330808	-2.57104261797348	0.0442820491375664	0.203426044547241	-3.71872751324118
Q9BYC5	FUT8	0.119786628154846	3.3066666186292	2.38500531613889	0.0565912058964225	0.226302826282454	-3.71906294543182
Q8N9V3	WDSUB1	-0.118533983579281	3.08920967474574	-2.40583868479686	0.0550477981710502	0.222981366192343	-3.72123411609016
O00217	NDUFS8	0.0888393689695304	3.27541302742764	2.53167672764243	0.0466259298191534	0.208320165385684	-3.72307114764572
Q9ULT0-4	TTC7A	0.103425445175437	3.3672523787686	2.39757605421622	0.0556545296171068	0.224671762003627	-3.7234884015853
Q6WKZ4-4	RAB11FIP1	0.0568923630841513	3.31307274376956	2.77106983262639	0.0341742280295984	0.180941806378936	-3.72450831308062
O43716	GATC	0.131775550276888	3.4194893356893	2.35808588459651	0.0586534800773625	0.230403667173117	-3.72666970840968
A3KN83-1	SBNO1	-0.0884983201991971	3.31145001851599	-2.81354758411383	0.032366504506053	0.176817066837866	-3.72770205025758
P15848	ARSB	0.0965070016362021	3.38384196158124	2.53089142836233	0.046674014182555	0.208320165385684	-3.72787568596305
Q8WV60	PTCD2	0.154479056214542	3.41311527400712	2.34168778664091	0.0599484351872525	0.232637528961356	-3.72982939373922
Q92623	TTC9	-0.184778826127894	3.37347700255192	-2.37048066100685	0.057694247146567	0.228513301036893	-3.73037992499812
Q96MX3	ZNF48	0.157174100453428	3.40416069309436	2.35505620877864	0.0588904949363993	0.230733623315632	-3.73106185466201
Q9P2D3-1	HEATR5B	-0.0735055251997247	3.2195386146805	-2.69759169734409	0.0375643299289919	0.188361790336749	-3.73205728065586
Q9BRR8	GPATCH1	0.0929157481180467	3.34201613595965	2.42720127621727	0.0535113416815282	0.220246251813672	-3.7331217299369
Q96JY6-5	PDLIM2	-0.127668980873506	3.3522967203876	-2.33827191960586	0.0602219551000362	0.233166867001674	-3.73323516875517
P40818	USP8	-0.164496746422992	3.39132611850803	-2.38645373072468	0.056482436984714	0.226283684880797	-3.73462536653652
Q99570	PIK3R4	-0.0507178415659297	3.32411344607393	-2.87339643790349	0.02999328466611	0.170703620147178	-3.73556082704606
Q4V328	GRIPAP1	-0.0615833090895906	3.3061248185046	-2.79047046688903	0.0333353813420564	0.17904344965357	-3.7363295741806
Q9UBQ0	VPS29	-0.0786012481540607	3.23247672914132	-2.66958408356317	0.0389505690841286	0.191925989732456	-3.73659749797356
Q969G6	RFK	-0.117021593134328	2.98447444826039	-2.38734031343788	0.0564159679016377	0.226135478443764	-3.73664401953184
Q6YHU6	THADA	-0.0737941411135343	3.32264402899682	-2.76142618706451	0.034599677688282	0.182188556777282	-3.73793785481903
Q99470	SDF2	0.12505415273785	3.33223837965256	2.39736524630554	0.0556701016122125	0.224671762003627	-3.73837998136539
Q9HAS0	C17orf75	-0.0997630622367138	3.20104419057345	-2.4864023586946	0.0494863496622135	0.213531650510968	-3.73942181045019
Q96AQ8-1	CCDC90A; MCUR1	0.121640483028373	3.35089132455459	2.33764090788542	0.0602726258986596	0.233166867001674	-3.73946383596146
P14618	PKM	-0.0869025879405111	3.13398371767129	-2.56432089554052	0.0446731779827267	0.204129018155735	-3.7399075212713
O75414	NME6	0.257228928801687	3.29494552315007	2.65696128871434	0.0395932495809322	0.19368672505149	-3.74033419144717
O43290	SART1	0.0804683142023745	3.35303367392909	2.93997730289598	0.0275733790679345	0.165656197501326	-3.7408372860633
P20839-6	IMPDH1	-0.0648968560600081	3.16984114585122	-2.60298673052866	0.0424727127100896	0.199175215105017	-3.74211830779471
Q9H6T3	RPAP3	-0.0904582808022319	3.30847028288771	-2.86420427872773	0.030345156480247	0.171560825730623	-3.74241065954007
Q9NQ55-3	PPAN-P2RY11; PPAN	0.0710289232124571	3.37894748535534	2.57403933733923	0.0441088558316333	0.202880526518307	-3.7426573156818
Q14517	FAT1	0.0598117828890575	3.4253546296637	2.80684085825434	0.0326448964952819	0.176817066837866	-3.74295025440523
Q9UHJ3-1	SFMBT1	0.0830328433670772	3.35784139231224	2.42482881655043	0.0536797113270826	0.220702435852828	-3.74327467745298
Q9P2J9	PDP2	0.150639583455532	3.44883522483184	2.36512716061247	0.0581065093881195	0.229064476857598	-3.74449272085769
Q6NX49	ZNF544	0.172290682197439	3.42765182605355	2.34941025023619	0.059334881488331	0.231192082670633	-3.74555972969647
Q5W111	SPRYD7	-0.152027588182402	3.03503631357025	-2.35159892907196	0.0591621953289053	0.231192082670633	-3.74565256599221
Q9HBU6-1	ETNK1	-0.13072461077371	3.34047431167191	-2.46985825143431	0.0505777229915258	0.215045932637805	-3.7461260507524
Q9P265	DIP2B	-0.0661804227383593	3.23871549837018	-2.7663273457105	0.0343827411658608	0.181669690237248	-3.74692576015729
Q9H4A3-7	WNK1	-0.0615588627969669	3.30778156237818	-2.80875469247532	0.0325651906498338	0.176817066837866	-3.7476121030394
Q5TBB1	RNASEH2B	-0.104279638506792	3.29086567783355	-2.4849382525826	0.0495819152951353	0.213823751626913	-3.74950597379579
Q969S3	ZNF622	-0.104934672230624	3.32182467490748	-2.51413053942148	0.0477130083552983	0.210496952329988	-3.75233242309539
O15091	KIAA0391	0.118732591770184	3.44888145180505	2.67746672554238	0.0385549302868137	0.190343259433999	-3.75318554043795
Q96SZ5	ADO	-0.0843952106626189	3.36492132799651	-2.40653069045307	0.0549973021457431	0.222894507164364	-3.75412900812497
Q9BV73-1	CEP250	0.0670036475152781	3.24088349479416	2.59800174714506	0.0427497706341689	0.200286309475224	-3.75692735559413
Q9Y2Z2-6	MTO1	0.100792481748128	3.3506907263169	2.53840595214946	0.0462160563326472	0.207836801983628	-3.75875010821158
Q9H3U1	UNC45A	-0.0788303736149215	3.29580498813465	-2.84573775391255	0.0310656857844326	0.173461383797793	-3.75944735238462
Q9NRX2	MRPL17	0.159876058449999	3.39338212378615	2.3388503526338	0.060175545802581	0.233166867001674	-3.75968583382269
Q9ULC4-3	MCTS1	-0.142623280636507	3.25346939532802	-2.64189927429701	0.0403750792057726	0.194571361599678	-3.76017039914633
Q9Y4X4-1	KLF12	0.233878394559196	3.23835817554444	2.47053416792315	0.0505326366717384	0.215045932637805	-3.76062511726327
Q8IU85-1	CAMK1D	-0.162409351519874	2.83387218022148	-2.31755530336568	0.0619091772600919	0.23712791210156	-3.76080844256951
Q9BW83-1	IFT27	-0.0870067148446428	3.22055112949166	-2.46431437645312	0.0509491386598623	0.215045932637805	-3.76145278258483
Q7L9L4-2	MOB1B	-0.142085240906357	3.29268419361047	-2.33187301961468	0.0607378770583215	0.234279031066588	-3.76348246576615
Q9H6K1	C6orf106	-0.129078646676587	3.31220724934256	-2.36534171104117	0.0580899276616311	0.229064476857598	-3.76356551693948
Q92890-1	UFD1L; UFD1	-0.0882253850528288	3.23656591074847	-2.66114163009273	0.0393791561585027	0.193169364480839	-3.76358625779887
Q8WW59	SPRYD4	0.148651920721985	3.39748138071413	2.44682990666416	0.0521396184800358	0.217873177003722	-3.76370833363156
Q96CV9-1	OPTN	-0.128364825855915	2.71525184258822	-2.46456612187324	0.0509322101468267	0.215045932637805	-3.76395861943584
Q9NPE3	NOP10	0.0914020796983249	3.33414868594031	2.42013318179478	0.0540146097339467	0.221013379135381	-3.76481487650478
Q9UH03-1	SEPT3	-0.0979698610249269	3.24669321551299	-2.43291190200114	0.0531083581889281	0.220071926007117	-3.7658070708253
P14859-6	POU2F1	-0.0691348847354846	3.34851880446826	-2.63873466862458	0.0405414453685224	0.19512796039354	-3.76716382413287
Q9UHI8	ADAMTS1	0.147901163395094	3.14088514696788	2.30198037838751	0.063210320951983	0.239728862907261	-3.76852758516008
P53609	PGGT1B	-0.0878307859074537	3.23457822537777	-2.42202083486001	0.0538797147729977	0.220932748123163	-3.76966468753421
O00186	STXBP3	0.0522884079827375	3.38139815098273	2.68397873450213	0.0382313483471354	0.189509048255112	-3.77022037980268
Q9HCJ6	VAT1L	-0.0929971329614262	3.41814339931077	-2.55579765359592	0.045174455302122	0.204833582197329	-3.77129595551073
P33992	MCM5	-0.0429444627919828	3.34948247378619	-3.09160232414838	0.0228209738159858	0.152113389327753	-3.77239100480211
O95997	PTTG1	-0.137057041647864	3.35640109984505	-2.4178064962184	0.054181371007261	0.221223777736938	-3.77264938971134
Q9NUP7-1	TRMT13	-0.103658272630756	3.27468897689857	-2.6172092459174	0.0416927750228397	0.197326940145112	-3.77390670678979
P08240-1	SRPR; SRPRA	-0.0909948975831429	3.28182292764261	-2.70974002498277	0.0369796616084088	0.187344856189286	-3.77551952092504
Q8NF99-1	ZNF397	0.22520545921293	3.35445290607149	2.37526496134853	0.0573284289671141	0.22765812410427	-3.77927814702923
Q8TCG1	KIAA1524; CIP2A	-0.0524203752742757	3.26021693021168	-2.72555364360383	0.0362332524014656	0.184951106070555	-3.78158341692145
P61011-1	SRP54	-0.0525848045580908	3.2850972466498	-2.88847823236652	0.0294255370421049	0.169611360020307	-3.78409687601661
P62241	RPS8	-0.12495263930025	3.34236629643576	-3.0424131789754	0.0242563394861444	0.156777284362005	-3.78579056635314
Q9UFN0	NIPSNAP3A	0.14757047053331	3.26853804766867	2.35049956074604	0.0592488689094926	0.231192082670633	-3.78631719501285
Q5H9L2	TCEAL5	-0.117213287850623	3.37046252352909	-2.31171507601156	0.0623937481187014	0.238033234990889	-3.78646326330386
Q5SRE5	NUP188	0.0805404370293677	3.3593399328753	2.8953889317005	0.0291693033504556	0.169007928064913	-3.7885299760094
Q96EH3	MALSU1	0.12175617061455	3.4035973703043	2.29247000668254	0.0640189129358895	0.241828212724837	-3.78868540549272
P00966	ASS1	-0.133999402547217	3.17886196593654	-2.50391327746371	0.0483584433862215	0.211399417469568	-3.78880258689238
Q6UW63	KDELC1	0.121507081935873	3.35240830922496	2.65607836656427	0.0396386277736356	0.19368672505149	-3.78996677830784
Q9UNS1	TIMELESS	-0.0470552754752442	3.33831366563367	-2.77470545557961	0.0340153070490296	0.180224748397897	-3.79082538800313
Q7Z422	SZRD1	-0.129424007007834	3.264208806928	-2.36516352842018	0.0581036983174297	0.229064476857598	-3.79109428828421
Q96IW2	SHD	-0.151521791915243	2.81645674526168	-2.28367800705927	0.0647760785273698	0.243116143519674	-3.79212150290737
P32119	PRDX2	-0.159784048887931	3.2954828114299	-2.61927933122896	0.0415805419143628	0.197186350541652	-3.79279633916291
Q6UB28	METAP1D	0.188956251236549	3.27972170063284	2.27631977643901	0.0654169804467088	0.24364435137121	-3.79327351595922
Q9UPT5	EXOC7	-0.0569138795783199	3.32999491610296	-2.74080284920461	0.0355288665184285	0.184014136699524	-3.79331488721108
Q96QU8	XPO6	-0.0757109159149825	3.29244061413099	-2.40070879875677	0.0554236614820475	0.224148830200458	-3.79353216960076
Q14562	DHX8	0.0523546902206139	3.31295945177396	2.70465159868532	0.0372233517079574	0.187763150776606	-3.79714391902347
O00192	ARVCF	0.0761826609692717	3.41689658402291	2.5932786596828	0.0430140602007953	0.200854455179855	-3.79821216537847
Q9H2M9	RAB3GAP2	-0.0504798047617034	3.34283180835897	-2.8838705451645	0.0295977408467799	0.170092784851308	-3.79868767247361
Q8N9N2-2	ASCC1	-0.123021379070641	3.26661318336648	-2.29490513211795	0.0638108454073786	0.2411609881603	-3.79875999654901
Q96M27-1	PRRC1	-0.0793535444733127	3.28511829960634	-2.51522554540943	0.0476443823602418	0.210436212704534	-3.80094601539981
Q8N5N7	MRPL50	0.179214365729745	3.40323888404499	2.45872783583229	0.0513263452171791	0.215767518085588	-3.80243976055879
Q14137	BOP1	0.0989918523574349	3.39083015450424	2.80135682860951	0.0328744645480335	0.177449698623109	-3.80263151844289
Q9P2K2	TXNDC16	0.16312685484093	3.46532850072749	2.27953788241346	0.0651358699756085	0.243173914575605	-3.80298984624878
Q9P0K7-1	RAI14	0.0875947089160994	3.3903741232887	2.96094257405034	0.0268561130078618	0.164437429366573	-3.80514442650998
Q9UIA9	XPO7	-0.0524559468945594	3.33546543755345	-2.90659827012164	0.0287588367102232	0.168297326652046	-3.80635771440156
O94985-1	CLSTN1	0.108822660342459	3.38587876577985	2.42016648334361	0.0540122268506281	0.221013379135381	-3.80765892487838
P39880-3	CUX1	0.0897292754497435	3.10987537497703	2.34027210912453	0.0600616342143016	0.232958977599657	-3.80766216069173
Q9BT17-1	MTG1	0.136871196863822	3.43567703840589	2.3690792821462	0.0578018654778433	0.228703409977315	-3.80788542575424
P30405	PPIF	0.103260424630899	3.37506517234302	2.53040725620574	0.0467036867131617	0.208320165385684	-3.80893590884877
Q86V97	KBTBD6	-0.105919420849215	3.15833483741548	-2.28390681506552	0.0647562551219717	0.243116143519674	-3.8090244738624
Q9BWS9-1	CHID1	0.0861663328170068	3.17153866977789	2.455501678299	0.0515455272393987	0.216215027326773	-3.80931489590134
Q9BTY2	FUCA2	0.0839517181874576	3.3127117944409	2.39012264063784	0.0562079067258676	0.225712368167442	-3.81087414641851
Q9H098-2	FAM107B	-0.205201030654144	3.03721511250776	-2.28263082094154	0.0648668855298191	0.243116143519674	-3.81159188241754
Q9BZ67	FRMD8	0.0780598389425317	3.34715904711104	2.39630373173264	0.0557485837812031	0.224800721377225	-3.81179975284071
Q15561	TEAD4	0.138853303035095	3.41988700838173	2.28726704040692	0.0644658639538675	0.242799267675048	-3.81270690796889
Q5JTC6-1	AMER1; FAM123B	0.110155013441819	3.38371123658852	2.25753140749906	0.0670837456928493	0.246214217617535	-3.81510586004512
P41212	ETV6	0.100944715322493	3.4460415364292	2.33200544048833	0.0607271534129692	0.234279031066588	-3.81587380955359
P11216	PYGB	-0.0748899868006898	3.29661541662627	-2.80567450365954	0.0326935756089308	0.176817066837866	-3.81761855515726
Q9UKI8-2	TLK1	-0.0723314728054483	3.38440925666643	-2.50532748293299	0.0482685545596847	0.211367780012501	-3.81774676257834
Q9NSD9	FARSB	-0.08778572306589	3.26453669514381	-2.77834127756978	0.0338571770043359	0.180008497558742	-3.81779691265828
P11182	DBT	0.139534639400832	3.42354358965108	2.5255184323063	0.0470044288755451	0.208928946933333	-3.81871784604938
O75386-2	TULP3	0.135155174064178	3.28945048852432	2.37817099058489	0.0571074233630234	0.227127087631475	-3.818967296073
Q86UY8	NT5DC3	0.204886381513118	3.32157566626101	2.26056267548949	0.0668118566975847	0.245685506499432	-3.82016789961776
P62304	SNRPE	0.10846914658724	3.28677735413228	2.52567092042888	0.0469950172247407	0.208928946933333	-3.82030716289996
Q5TAQ9-1	DCAF8	-0.0681619684220567	3.28327444463171	-2.49236576880307	0.0490991241239852	0.213059095180551	-3.82071237681311
Q99519	NEU1	0.116394857901785	3.35884105544783	2.35487041287775	0.0589050627645069	0.230733623315632	-3.82075877967399
P29084	GTF2E2	-0.111013463915646	3.26890693935158	-2.46109446396977	0.0511661882051401	0.215448406097604	-3.82221467800292
P49821	NDUFV1	0.133537069227364	3.30613236083798	2.48406277344142	0.0496391536552083	0.213950329686943	-3.82379129327184
Q8IYB1	MB21D2	-0.0876691594607552	3.41973506824874	-2.49118588963024	0.0491754812367939	0.21326980895912	-3.82534214562241
Q8NC96	NECAP1	-0.12169142574027	3.19464231544405	-2.33093223719485	0.0608141204322654	0.23439877635707	-3.82559094110727
Q9NUJ3	TCP11L1	-0.105454991169427	3.19521181669742	-2.32210383163931	0.0615345199921044	0.23617846520065	-3.82577218713581
P00338-3	LDHA	-0.0840215184750256	3.01885319453503	-2.96576209992851	0.0266941224572944	0.164245750952721	-3.82588537205779
Q9H6U6-8	BCAS3	-0.0695556445154947	3.17885990828386	-2.41843604962631	0.054136195094415	0.22115702277122	-3.82668300919773
P52597	HNRNPF	0.0986721584972975	3.32364124105394	2.91097213895144	0.0286003831683079	0.167988157273279	-3.82695471149636
O95049-3	TJP3	0.127704395526078	3.42084151940459	2.23819374878584	0.0688456723783327	0.248661605160567	-3.82968301212773
Q9HCS7	XAB2	0.0898517136993253	3.33841097031012	2.71085155905765	0.0369266583855849	0.187344856189286	-3.82970087518043
Q9NYB0	TERF2IP	0.104058166580076	3.14145033333632	2.55862359995696	0.0450075898288581	0.204577344821874	-3.83061050084255
Q6P4F7	ARHGAP11A	0.112709425810343	3.38329478968424	2.47646949483189	0.0501385565115222	0.215016321375704	-3.83124632693207
Q96I99-1	SUCLG2	0.139978550551384	3.2188526738768	2.57759992338685	0.0439040159793846	0.202496566124439	-3.83258292990458
Q8N6H7	ARFGAP2	-0.0843396064364908	3.31939236052067	-2.55605100334929	0.0451594686459708	0.204833582197329	-3.83429513893604
Q8TB45	DEPTOR	0.144694519917038	2.31733641509342	2.23348035638083	0.0692824079985054	0.248809431598481	-3.83462092264004
Q99611	SEPHS2	-0.10081215619109	3.21187702401694	-2.25565817430998	0.0672523431060969	0.246399224598842	-3.83485502327064
Q9Y547	HSPB11	-0.0974182638326109	3.34485744247845	-2.25961634163773	0.0668966139972491	0.24580020238836	-3.83526664098155
Q9H0B6	KLC2	-0.0559826050554698	3.25060854198288	-2.68380719329829	0.0382398346290119	0.189509048255112	-3.83613912659784
Q96JN0-3	LCOR	0.147787310664583	3.3318702618892	2.44601321068216	0.0521959424213068	0.217989804167809	-3.83793719689914
Q13794	PMAIP1	0.138923006130735	3.42082034453255	2.22936403709228	0.0696661842949352	0.249523326755716	-3.83805329581807
Q8IU81	IRF2BP1	-0.0599978575627376	3.30422438466299	-2.63276830662016	0.0408571086702646	0.19597024532475	-3.83897905586887
O95825-1	CRYZL1	-0.0694892503413824	3.12255464075095	-2.4336666518351	0.0530553386530365	0.220071926007117	-3.83954999946343
Q9NX24	NHP2	0.194072002894389	3.34779718297322	2.41048062392877	0.054710010079338	0.222609140372962	-3.83999345394967
O14874	BCKDK	0.142245047341074	3.37784777965627	2.31590640383181	0.0620455866358049	0.23753079162825	-3.84089039171655
O94910	LPHN1; ADGRL1	0.0887060464146893	3.39657835458454	2.31302871611916	0.0622844075669761	0.237852650499672	-3.84192965185897
Q9H939-1	PSTPIP2	-0.172025384058447	2.86627570503039	-2.23821749458708	0.068843479417754	0.248661605160567	-3.84344303739322
Q7Z7K0	CMC1	0.106259544952908	3.24106961934101	2.24450789972266	0.0682651115939523	0.248213239880949	-3.84344762070215
Q8TD26	CHD6	0.0699081275046743	3.35144436700776	2.48141717953196	0.049812548720586	0.214216296964314	-3.84421613326642
P30837	ALDH1B1	0.135662732629868	3.39765605164048	2.63458140807736	0.0407609043218578	0.195693152664138	-3.84517368181954
Q9NXX6	NSMCE4A	0.101213836837214	3.26527947766751	2.27994466680108	0.0651004264124353	0.243159917933887	-3.84571587419861
P80404	ABAT	0.148073798376331	3.31311365770461	2.25839760548211	0.067005934369327	0.246084025122775	-3.84630061208026
Q8NEZ5-1	FBXO22	-0.060110035123417	3.26452542960976	-2.4877715742291	0.0493971550826687	0.213531650510968	-3.84712471118678
Q7L945	ZNF627	0.121800018603262	3.37818360431635	2.23324047031495	0.069304712633727	0.248809431598481	-3.84807666080866
Q8WV44-1	TRIM41	0.111153859621709	3.27309183110126	2.2242108200952	0.0701497610752426	0.250204075764417	-3.84812887020626
P16401	HIST1H1B	-0.156610126463575	3.46091150646651	-2.72454891993262	0.036280188808787	0.185067558870355	-3.84820060545177
P30876	POLR2B	0.0661412281818482	3.37384025420261	3.03228981379116	0.0245638606886161	0.15768952073351	-3.84826916645725
Q9UKN8	GTF3C4	0.0661837871096914	3.34974450951747	2.88555113684972	0.0295348051074757	0.169858339418706	-3.84863290674815
P19447	ERCC3	0.0856813618985016	3.34472951084987	2.51934707827374	0.0473870204153053	0.209782585473873	-3.8493256885863
Q14674-1	ESPL1	-0.0562114740321905	3.28865601656764	-2.62199289460926	0.0414339123248687	0.197074380258148	-3.84952467460882
Q96EE3-1	SEH1L	0.0573294941406276	3.39543258447809	2.72074103049445	0.0364586737812298	0.185854448670827	-3.85147108971908
Q9C0B7	TANGO6; TMCO7	-0.0742902579397383	3.30404490486233	-2.48789312291272	0.04938924532787	0.213531650510968	-3.85277375664454
O00287	RFXAP	-0.0929994761080928	3.22783272122401	-2.31112296397514	0.0624430983327709	0.238103106565118	-3.85395949549902
Q7Z2W4	ZC3HAV1	-0.0437239206221553	3.342035467133	-2.70873275066846	0.0370277641087267	0.187352072054031	-3.85409131625751
O15305	PMM2	-0.162990092517221	3.23439323278734	-2.47587635246484	0.050177791274905	0.215016321375704	-3.85413853828274
Q6PL24	TMED8	-0.0902665205172245	3.20290849230023	-2.27796586573851	0.0652730315861659	0.243508613013158	-3.85485163505068
Q92733	PRCC	0.0712760132404094	3.33449946616581	2.53524166680966	0.046408310162682	0.208188152408893	-3.85495041918733
Q8NHM5-1	KDM2B	0.048507285880875	3.43130828990877	2.80730890187535	0.0326253842684795	0.176817066837866	-3.85653250801088
Q9Y2W1	THRAP3	0.134862536222315	3.37760365943649	3.00943073605459	0.0252740833009282	0.159973984141078	-3.8571018668281
Q9H825-1	METTL8	0.0941138708224565	3.43528967027156	2.24561285817033	0.0681640418217107	0.248080896041824	-3.85729804237233
Q7KZ85	SUPT6H	0.0621469550197901	3.34569130360405	2.90937452287851	0.0286581499866282	0.167988157273279	-3.85758064293234
Q16595-1	FXN	0.168984155529404	3.37268446381858	2.50894883541748	0.0480391870050614	0.211118430594956	-3.85862294409507
O75306-1	NDUFS2	0.114271688297739	3.29334685660079	2.63533560694737	0.0407209577094523	0.195660457867065	-3.86156623322399
Q86U70	LDB1	-0.107287229484363	3.34037354751731	-2.23739546273233	0.0689194377428697	0.248661605160567	-3.86215057120779
Q96GD4-5	AURKB	0.076171039143706	3.37209441762427	2.58728082343863	0.0433522063272375	0.201713433444471	-3.86286898551472
Q6XQN6-1	NAPRT1; NAPRT	-0.0789096381642025	3.30748902438566	-2.36603561007113	0.0580363332033954	0.229064476857598	-3.86292734391642
Q6ZU35	KIAA1211	0.0700402265533256	3.35200476808936	2.38229072327449	0.0567956549728952	0.226682700855059	-3.8652098197
P54619-3	PRKAG1	-0.0835327061379122	3.23419077693519	-2.36001505894963	0.0585030828006997	0.230054152356211	-3.86756944089647
P11171-1	EPB41	0.112667602843024	3.38726471055748	2.43574156159011	0.052909869713206	0.219894106413714	-3.86765813887785
Q99471-1	PFDN5	-0.0939334161266616	3.21284652026791	-2.47096328586357	0.0505040349664364	0.215045932637805	-3.86862743604657
O14818-1	PSMA7	-0.0576669836859433	3.30787980185412	-2.48753172110464	0.0494127674283874	0.213531650510968	-3.86922682487096
Q969Y2-2	GTPBP3	0.182146632581771	3.28394925107168	2.19891259578963	0.0725749823248902	0.254341947613823	-3.86965156528737
P32969	RPL9	-0.0650261757495449	3.32529950899636	-2.92698584565507	0.0280283168601649	0.166541466391045	-3.86994156953275
Q5R3I4	TTC38	-0.136596981335162	3.26940623421153	-2.28093823157231	0.0650139409505878	0.243153942020095	-3.87178585595753
Q6NXT4-2	SLC30A6	0.104988877029921	3.34363288569336	2.22637786332777	0.0699459811387394	0.250040448971493	-3.87221208485168
P20248	CCNA2	-0.0861816866270183	3.34980931941973	-2.52021695743484	0.0473328919996576	0.209782585473873	-3.87237146978274
Q9BSL1	UBAC1	-0.076127965059094	3.27298223165632	-2.3899318223988	0.056222150100102	0.225712368167442	-3.87295414157956
Q6NSZ9	ZNF498; ZSCAN25	0.186879279199924	3.41972757063014	2.20465988621892	0.0720164583563259	0.253212772002627	-3.87366887599863
Q96BN8	FAM105B; OTULIN	-0.14872368684915	3.18125083489844	-2.39409182919897	0.0559124949255834	0.22517620003626	-3.87379331066163
Q9NW08	POLR3B	-0.0489205220765747	3.27980942706356	-2.71467506795987	0.0367449601924215	0.186667429580058	-3.87381199179926
P35219	CA8	-0.235587860869324	2.1677487793902	-2.23575716811035	0.0690710823021834	0.248661605160567	-3.87500913468823
O14744	PRMT5	-0.0755845367552179	3.28880781938771	-2.6543592161393	0.0397271448468825	0.19368672505149	-3.8754670970044
Q9Y4K1	AIM1; CRYBG1	0.0628749032159242	3.47720985735748	2.53842484727398	0.0462149108705472	0.207836801983628	-3.87811466838247
Q9BPY3	FAM118B	-0.0888823074033463	3.36393268368345	-2.38423994069961	0.0566487712067739	0.226359048280401	-3.8785406892224
Q7L590-1	MCM10	0.125260905887977	3.33891570887154	2.21207411948322	0.0713025404427319	0.252330014708735	-3.87941957373515
Q9BV19	C1orf50	-0.132976021028629	3.24706252254623	-2.18606168545655	0.0738401965530551	0.256502973171396	-3.87961509498682
Q14106	TOB2	-0.141950926250128	3.39226832148687	-2.18533519282872	0.0739124031615085	0.256502973171396	-3.88138774844704
Q8WXF1	PSPC1	0.0521983579831301	3.36927277264893	2.81681695308048	0.032231729359967	0.176817066837866	-3.88217611136149
Q8NB90-1	SPATA5	-0.0597636158009089	3.28604895901239	-2.69016733367504	0.0379265460023872	0.188909866873645	-3.88292012610391
Q86TV6-2	TTC7B	0.106621629359772	3.24262092481683	2.31356074130718	0.0622401818424861	0.23780212903165	-3.88507600719505
P25398	RPS12	-0.100902286482925	3.32324437211274	-2.8232017077022	0.0319702787093962	0.176330681709912	-3.88592606146046
Q6ULP2	AFTPH	-0.0601693765825722	3.22568385146251	-2.51175614349525	0.0478621782198436	0.210680911333158	-3.88630857222731
Q15102	PAFAH1B3	-0.0899715742127897	3.25660369771939	-2.45711324931759	0.0514359146968171	0.215991427232611	-3.88803602654038
P54252	ATXN3	-0.11367767982159	3.32622650483865	-2.27774132891943	0.0652926475512031	0.243508613013158	-3.88838241032194
P62081	RPS7	-0.0961762666097827	3.36365804059195	-2.50424291734358	0.0483374750997885	0.211399417469568	-3.88892051697173
O14530	TXNDC9	-0.0843634098393377	3.31932881440593	-2.48728476333801	0.049428847710468	0.213531650510968	-3.88935364969802
Q68D10-1	SPTY2D1	0.0999811159627487	3.4311005689791	2.37394667975244	0.0574289827212295	0.227697754747945	-3.88966714396974
Q06203	PPAT	-0.0855807300843993	3.2821966238581	-2.70311498277063	0.0372972818704478	0.188005746721469	-3.88968122319578
O95251-1	KAT7	0.0705231580827703	3.38573412676453	2.62336820965422	0.0413598080428837	0.197010255216405	-3.89031439269718
Q6DKK2	TTC19	0.0726263765700051	3.37872557089508	2.40927230447081	0.0547977262867865	0.222609140372962	-3.89120303791387
O94813	SLIT2	0.155926097221898	3.25595874817284	2.17316394911983	0.075133076979291	0.257791129957567	-3.89182493213345
Q9BYJ9-1	YTHDF1	-0.0700188091682371	3.36552715996245	-2.42749741529175	0.0534903644811587	0.220246251813672	-3.89312225423421
P30520	ADSS	-0.0990347471665953	3.32511386072559	-2.69569808740555	0.0376563588602046	0.188498451285372	-3.89328697888307
Q8TEA8	DTD1	-0.102773245922413	3.34903000428523	-2.23639302752136	0.0690121842924153	0.248661605160567	-3.89364965012464
O43309	ZSCAN12	0.282990505055304	3.37859842628133	2.42647032927055	0.0535631560930389	0.220341304850292	-3.89404135279615
Q9Y2T7	YBX2	-0.142113250172406	3.42516275066827	-2.23488786621819	0.069151688373645	0.248661605160567	-3.8944785394824
Q9UK59	DBR1	-0.0751608254947432	3.26221609481006	-2.58486063593935	0.0434894568979831	0.201878978080417	-3.89462840604175
Q7Z4H3-1	HDDC2	-0.134277080065612	3.14801714617081	-2.25070909685376	0.0676999113476727	0.247239838524145	-3.89517883377836
Q5SW96	LDLRAP1	-0.100995453369114	3.3081197542013	-2.21569093987711	0.0709569541703842	0.251679034856767	-3.89654561312915
Q9Y580	RBM7	0.0934334321444362	3.36878717872121	2.37399214965114	0.0574255113439637	0.227697754747945	-3.89678249365458
Q9C0D4	ZNF518B	0.213026712687398	3.38554158533891	2.16858244207774	0.0755979676068213	0.25903868132181	-3.89694592163291
Q9P2H3-3	TRIM59; IFT80	-0.0959319522510735	3.32328368910736	-2.27388645671107	0.0656303810370601	0.243913178116457	-3.89881244765037
Q7L8L6	FASTKD5	0.129500774267829	3.4073296551885	2.49951572199182	0.0486390990865574	0.212022254654584	-3.89989878564146
Q9UQ13	SHOC2	-0.0867865654704865	3.20950965535136	-2.26155996358817	0.0667226572674048	0.24563158663893	-3.9000753554963
Q9BV79	MECR	0.142104814392522	3.32747390335022	2.27098773791366	0.0658855484628143	0.244190303288266	-3.90064302610362
Q8NCP5	ZBTB44	0.125635489172653	3.42618205471416	2.16256811935868	0.0762127806588775	0.259555791100656	-3.90101388846529
Q13409-2	DYNC1I2	-0.0502803799181851	3.3497003028088	-2.80011890434925	0.03292652724674	0.177449698623109	-3.90239786447129
Q9NPJ6-1	MED4	0.0836405177718215	3.30037587416808	2.28315614488902	0.0648213152731787	0.243116143519674	-3.90310014255737
P14550	AKR1A1	-0.0878661363305985	3.27727069120693	-2.56498408744498	0.0446344238563097	0.20409325588286	-3.90326823925337
O15066	KIF3B	-0.0698041564207663	3.2399851478242	-2.49303845475579	0.0490556470430359	0.212990902158558	-3.90567237594559
Q92615	LARP4B	-0.0511885742882859	3.20160174193336	-2.58721791636482	0.0433557679548921	0.201713433444471	-3.90671458797092
Q9GZT9-1	EGLN1	-0.106466999173395	2.73067944162532	-2.38121161596777	0.0568771442960022	0.226682700855059	-3.90681924973915
P52657	GTF2A2	-0.119945818944983	3.35863344843275	-2.16795691319822	0.0756616718450062	0.259077929841207	-3.91000214381044
Q52LJ0-2	FAM98B	-0.0664380600661705	3.32463077231372	-2.54719682183293	0.0456863951374533	0.206180013820319	-3.91042622530258
Q5VW36	FOCAD	-0.0558484751960265	3.32522458743717	-2.45829309746903	0.0513558231374426	0.215773206522705	-3.91045878227465
Q9NXR5	ANKRD10	-0.10467116861386	3.3777344228806	-2.18341679996253	0.0741034263458975	0.256502973171396	-3.91051259438476
P13994	CCDC130	0.097858045514765	3.35201732671635	2.26947544338228	0.0660190842220438	0.244227604867281	-3.91051634877681
Q8IWQ3-4	BRSK2	-0.118969886640136	3.28084251687017	-2.23570163806382	0.0690762283964622	0.248661605160567	-3.9106119579038
Q9Y5P6-2	GMPPB	-0.0889905139631026	3.24300462379326	-2.39750943283487	0.0556594503190146	0.224671762003627	-3.91100072855515
Q9NW81-4	ATP5SL; DMAC2	0.231289280914674	3.40227656571342	2.15278703688645	0.0772237410736483	0.261848567179218	-3.91210340244398
Q16134	ETFDH	0.131279827245661	3.14522462588857	2.19376127539215	0.0730794186915015	0.255222146802382	-3.91231924543663
Q6PJT7-9	ZC3H14	0.134191498376448	3.43571347932374	2.21712954084242	0.070819981619638	0.251515742053235	-3.91752791533401
O43402	EMC8	0.089523400139094	3.34972505150687	2.56491003924357	0.0446387491360061	0.20409325588286	-3.91883445651848
Q9NXF1	TEX10	0.0928391502625963	3.39065745306988	2.68214834714313	0.0383220038354292	0.189559260751395	-3.91992781322526
Q709C8	VPS13C	-0.0552263978932155	3.03229478431878	-2.73541785649375	0.035775904338481	0.184014136699524	-3.92008882191355
Q9BXW7	CECR5; HDHD5	0.112658931026469	3.2852845363115	2.40956207153329	0.0547766775084422	0.222609140372962	-3.92104753285669
P82921	MRPS21	0.164452125133596	3.3508470295293	2.1415454311815	0.0784028326136999	0.263112997092715	-3.92113006307353
Q96SZ6-3	CDK5RAP1	0.15426983646279	3.39420233339651	2.4322706146174	0.0531534513674646	0.220071926007117	-3.9214881011983
O15160	POLR1C	0.0732572395690267	3.32463822879547	2.46638907996666	0.0508098042762364	0.215045932637805	-3.92184559467359
O43292-1	GPAA1	-0.181061519094232	3.27630605639605	-2.13966573903834	0.0786017975134638	0.263218241171233	-3.92353333088421
Q14687	GSE1	-0.0631341519338332	3.31810245795167	-2.533997474088	0.0464841377836854	0.208188152408893	-3.92572263038901
Q9H0R6-1	QRSL1	0.120425249475218	3.40973493026367	2.430285820031	0.0532932728212906	0.220077975055251	-3.92598414683054
Q8NFH4	NUP37	0.125176984715814	3.352185133773	2.4222668499002	0.0538621604101589	0.220932748123163	-3.92973236677233
Q96CM3	RPUSD4	0.199403444039115	3.45599280094983	2.33729164633868	0.0603006911985226	0.233166867001674	-3.93056862055257
O95402-1	MED26	0.0746653737140086	3.38006243959223	2.26381522243463	0.0665214014470761	0.2453616307221	-3.93171629180586
P61313-1	RPL15	-0.0703301442042862	3.38660863349192	-2.73665323397322	0.0357190675443197	0.184014136699524	-3.93192044196736
Q9H7E9-2	C8orf33	-0.0964544342715073	3.23191959798542	-2.21651843517037	0.0708781327318945	0.251515742053235	-3.93241666725899
Q96F10	SAT2	-0.168474455691141	3.29745423819247	-2.15105478337763	0.0774042277000881	0.262067623528277	-3.93281200148799
Q9NSI6-2	BRWD1	0.07364299514388	3.38768728105008	2.44398066500438	0.0523363986163291	0.218220027274172	-3.93378702464704
O95671-1	ASMTL	-0.127751476728407	3.40175676917934	-2.50141144472564	0.0485179003157266	0.211670603279899	-3.93402068469596
Q9Y3B7-1	MRPL11	0.127424342402295	3.37713662923621	2.31929760902808	0.0617653829772122	0.236813602299436	-3.93525769186549
P55809	OXCT1	0.130968983570257	3.40754721766014	2.62304667147078	0.0413771203104456	0.197010255216405	-3.93574140140622
P50914	RPL14	-0.161541310521843	3.35060765379146	-2.57520165194337	0.0440418758758359	0.202880526518307	-3.93727370875509
Q6W2J9-1	BCOR	0.0750913693197273	3.3268477829679	2.65407676884668	0.039741708049653	0.19368672505149	-3.93740919403557
Q14686	NCOA6	0.0796347747574576	3.17693847188147	2.22608462636184	0.0699735198047178	0.250040448971493	-3.93797132578013
O00193	C11orf58	-0.11315931549998	3.27838320730735	-2.53226462066469	0.0465899673660982	0.208320165385684	-3.93813903319861
Q92997	DVL3	-0.103015453456236	3.38313831205185	-2.18216404648549	0.0742284454599215	0.256522807913747	-3.93870433101366
Q8TBA6	GOLGA5	0.0803775066350389	3.34239745184522	2.61838796927291	0.041628828791165	0.197186350541652	-3.93876190819677
O95619	YEATS4	0.06874734795802	3.35969939640344	2.40689613714367	0.0549706550795136	0.222894507164364	-3.93963024982063
Q8IYW5	RNF168	0.123556209963572	3.32700544927629	2.17141672361396	0.0753100190474896	0.258282729607662	-3.93998282130594
Q96EP0-1	RNF31	-0.067741723964879	3.35713406370553	-2.46679989248753	0.0507822626930238	0.215045932637805	-3.94069761047213
Q9H814	PHAX	-0.0672960857730314	3.32053425050947	-2.44778520200176	0.0520738177722208	0.217716801061841	-3.94183227933924
P25440-2	BRD2	-0.0503261460012747	3.22981906746237	-2.57740525380746	0.0439151889348487	0.202496566124439	-3.94210948979659
O14772	FPGT	-0.119291404838898	3.03707473412848	-2.13924172376604	0.0786467515648054	0.263253873475212	-3.94223782000708
Q7Z6J8	UBE3D	-0.101164408280925	3.34347151178346	-2.18754957660734	0.0736925426655676	0.256502973171396	-3.94265496081089
P49368-1	CCT3	-0.0386529654369906	3.29581558505761	-3.17439232943925	0.0206111871441606	0.146188927758839	-3.94321912052007
O95299	NDUFA10	0.137079266587581	3.35223781007692	2.34858701721463	0.0593999716982174	0.231210848741108	-3.94397832450516
Q12933-2	TRAF2	-0.078501335807196	3.31900219655615	-2.36265887741971	0.0582976323730867	0.229481495929359	-3.94513289892703
O43242	PSMD3	-0.0465753437795301	3.31975954801262	-2.8893584852631	0.0293927634348131	0.169611360020307	-3.94625031803406
Q9UPN7	PPP6R1	-0.0589692191622249	3.20178235666644	-2.44786634672658	0.0520682325882104	0.217716801061841	-3.94699313164397
Q96G46	DUS3L	-0.104831740767661	3.17911365951548	-2.33695226316596	0.0603279758861214	0.233166867001674	-3.94727695246648
Q96AB3-2	ISOC2	0.140880970755324	3.37586562606395	2.12680315243148	0.0799773834498858	0.26515250322243	-3.94790365725824
Q12979	ABR	-0.0819252014037828	3.16616787378214	-2.27202883975731	0.0657937833962902	0.243996609737936	-3.94803281982656
Q9Y3D2	MSRB2	0.148054274431129	3.28055710395721	2.11107021026671	0.0816938142549439	0.266563508101709	-3.94878155049939
Q13630	TSTA3	-0.10733224074796	3.27489111498014	-2.39464295979322	0.0558716062684083	0.225129707610939	-3.94929699828803
Q6IE81-1	PHF17; JADE1	0.0566767807821592	3.43630813062747	2.5582992556411	0.045026708082059	0.204577344821874	-3.94960259970931
Q9NRW7	VPS45	-0.0771810818140143	3.27463857147245	-2.44228669276746	0.0524537645061188	0.218473789929545	-3.95148699730219
P17812	CTPS1	-0.0768977692433451	3.23506803311074	-2.72606891405244	0.0362092065950504	0.184951106070555	-3.95178196083766
Q8IUR0	TRAPPC5	-0.112997098077496	3.3477550033144	-2.12827755524424	0.079818449242934	0.264864681051812	-3.95179480225247
P23378	GLDC	0.129543983396787	3.47790134267301	2.73325538909257	0.0358756296297077	0.184210552368299	-3.95198819168695
O14524-1	TMEM194A; NEMP1	0.163649111431364	3.28070046287319	2.10597186009085	0.0822581513813111	0.267069207531705	-3.95339749329267
Q6P1L8	MRPL14	0.117093442506374	3.42711251935973	2.25100146241004	0.067673385043404	0.247239838524145	-3.95415288107394
Q8NDX6	ZNF740	0.159870597408831	3.35210992423059	2.14654498180475	0.0778761636543694	0.262622385739043	-3.95460358881211
Q9Y4X5	ARIH1	-0.101703946581025	3.24046031485235	-2.55765662352245	0.0450646132363095	0.204577344821874	-3.9550458058112
P04179	SOD2	0.145375878949092	3.38186923541938	2.57060829749274	0.0443072106932272	0.203426044547241	-3.95607618939821
Q14444-1	CAPRIN1	-0.0449637022199426	3.37380880214644	-2.94840832017218	0.027282453289641	0.164893553879138	-3.95766671763634
Q9BSB4	C12orf44; ATG101	-0.0902157478001796	3.34789630524684	-2.21170585609326	0.071337826108348	0.252330014708735	-3.95797574939656
Q96EV8-1	DTNBP1	-0.0990785722059603	3.08724462247981	-2.12980993610679	0.0796536110419681	0.264705517690185	-3.95858264562156
Q15459	SF3A1	0.0704593298490116	3.34226704940476	2.9260051965499	0.028062988226415	0.166541466391045	-3.9595334062182
Q9BXW6-1	OSBPL1A	-0.0571567434374955	3.26803534220159	-2.46918237267204	0.0506228495452349	0.215045932637805	-3.95964816995231
Q96RR1-1	C10orf2; TWNK	0.111916640248286	3.35356903435608	2.1839768542746	0.0740476062240613	0.256502973171396	-3.96189191683988
P26006-1	ITGA3	0.123158197688482	3.29548123470622	2.13782394888309	0.0787972570959473	0.263298151759629	-3.96224618986509
Q5T1M5	FKBP15	-0.0650792548636381	3.22673188063483	-2.50285842419417	0.0484256073976892	0.21157247150061	-3.96276005611331
P19404	NDUFV2	0.12528141135891	3.34054858633776	2.52343472099749	0.0471332383293487	0.209020927435123	-3.96313280518061
Q9H9L4-1	KANSL2	0.0714786608945518	3.3768155240367	2.3307361247525	0.0608300265546045	0.23439877635707	-3.96327138024758
Q96I27-2	ZNF625	0.179730533557811	3.40000629516736	2.09556764175118	0.0834222966636932	0.268914226892376	-3.96411284189801
Q9H089	LSG1	0.0678015065984081	3.37179348677734	2.68106030858663	0.0383760019346539	0.189704050800686	-3.96438014630637
P62906	RPL10A	-0.0689021614494696	3.35059900235996	-3.0173468064951	0.0250256213844076	0.159581637815646	-3.96483348108051
Q9NRP2	CMC2	0.149619117829697	3.25949767133685	2.1582594638344	0.0766564173334163	0.260787303215532	-3.96521733577641
O95352	ATG7	-0.0753348880102738	3.2725188038717	-2.26692553651385	0.0662448830743433	0.244694628284238	-3.96591211403474
Q8NE62	CHDH	0.115454373064553	3.30608881547081	2.1777956840814	0.0746661043336736	0.257678300721636	-3.96644239563801
P37802-2	TAGLN2	-0.0893789419415865	2.93745944718861	-2.43510095415337	0.052954736605145	0.219961418102151	-3.96711308919356
Q8N201	INTS1	0.0542988527994653	3.34918240696522	2.77517582726403	0.033994804584838	0.180224748397897	-3.96717031571144
Q9BT40	INPP5K	0.0777289963229776	3.31638981383095	2.24674829015817	0.0680603474583376	0.247924753374311	-3.96781540156864
Q6P1K8	GTF2H2D; GTF2H2C_2; GTF2H2C	0.0731414516870138	3.34992803490645	2.28148801189389	0.0649661367169958	0.243153942020095	-3.96996395111347
Q9Y587-2	AP4S1	-0.103394077739449	3.3650784389746	-2.13346401521825	0.0792619598396698	0.264238035874994	-3.97109514627242
Q9Y450-1	HBS1L	-0.0582441291175146	3.21559307852998	-2.62046617224908	0.0415163416039014	0.197186350541652	-3.9719236487478
Q15814	TBCC	-0.11313287570542	3.32754098978018	-2.28291919581637	0.0648418657312922	0.243116143519674	-3.97195310246235
Q8WYB5	KAT6B	0.133883146368565	3.37755185581499	2.23261669247341	0.0693627466477718	0.248901306025119	-3.97242694945766
Q92925-1	SMARCD2	0.0740878450883639	3.35119135613299	2.4789221383575	0.04997666675189	0.214801673568908	-3.97341142397608
Q92466	DDB2	0.0990580224083899	3.02928810490768	2.24754164987108	0.0679879909553846	0.247792810740955	-3.97589961083695
Q9Y388	RBMX2	0.0867560740002545	3.35311268731571	2.23102877884621	0.0695107092474207	0.249211083533016	-3.97816215188079
P25705-1	ATP5A1	0.137311831276466	3.3916876967448	3.12591415518601	0.0218750155152612	0.150321027966593	-3.9782232528728
Q5VUA4	ZNF318	0.0558383021601173	3.34887201795774	2.75978481123584	0.0346726593091806	0.18232508520244	-3.97924192829359
Q12872-2	SFSWAP	0.0553362819779362	3.33750152147256	2.5475328263761	0.0456662795082231	0.206180013820319	-3.98014060960736
Q9BQ75	CMSS1	0.0759378058130071	3.29313853780271	2.26933625444033	0.0660313888469847	0.244227604867281	-3.98098503446261
Q9BSU1	C16orf70	0.145215770665459	3.21238805896922	2.08246369866175	0.0849126989076956	0.271597588574141	-3.98156975346097
Q99747	NAPG	-0.097519482467405	3.34537526809455	-2.65702534785462	0.0395899594060683	0.19368672505149	-3.98211870878693
Q9Y3F4-2	STRAP	-0.063462472188426	3.30823205046157	-2.75393061534485	0.0349343172465693	0.183196341395456	-3.98348828604227
P51513-1	NOVA1	0.163889622181976	3.32062310025186	2.07713634134531	0.0855264225009608	0.272448580899754	-3.98358412501635
Q92835	INPP5D	-0.197799821727415	2.46826449130563	-2.16622275337439	0.0758385710079235	0.259463185493788	-3.98398004541354
Q9Y4F9	FAM65B; RIPOR2	0.161206799292146	3.25625859399316	2.07898531601249	0.0853129013769418	0.272149929049438	-3.98617486132261
Q14696	MESDC2; MESD	0.0926888356511351	3.34435934197805	2.53583221151948	0.0463723654910552	0.208188152408893	-3.98639905814252
Q6IA69	NADSYN1	-0.0829311218942689	3.30732585031149	-2.16256175944461	0.0762134335367039	0.259555791100656	-3.98755442441618
P16220-1	CREB1	0.10711169822778	3.37284051404024	2.21480612224259	0.0710413367601338	0.251765612913921	-3.98810786567435
Q9Y5L4	TIMM13	0.106874919575977	3.35787882811828	2.55119581841821	0.0454475994797685	0.205707364724946	-3.98903967564654
Q02880-2	TOP2B	0.0706729110641013	3.3572915226214	2.87475002796015	0.0299418457163486	0.170703620147178	-3.98934581867684
Q01415-1	GALK2	-0.0832278296301658	3.01589865008543	-2.15677892191776	0.0768094770032403	0.261054836868359	-3.98973441437921
Q8NHV4-3	NEDD1	-0.0795874268603425	3.25133838228416	-2.3069015929245	0.0627961230051615	0.238855654782151	-3.9906665348667
Q14197	ICT1; MRPL58	0.130102431221098	3.39794348988842	2.35072123127083	0.0592313817686371	0.231192082670633	-3.99127484538067
O95551-2	TDP2	-0.0855145980575956	3.2844278003479	-2.16496741274344	0.0759668940791516	0.259491545581145	-3.99213728577436
Q15776	ZKSCAN8; ZNF192	0.255351123125674	3.19585602785642	2.130575889472	0.0795713493362828	0.264705517690185	-3.99263603915239
P78417	GSTO1	-0.134155257139535	3.05659989535898	-2.49450993410526	0.0489606851001042	0.21281947653711	-3.99298191986141
Q96IU4	ABHD14B	-0.230303827536579	2.11658584718273	-2.11981721430121	0.0807348926313737	0.265950234550408	-3.9932487435261
Q9H165-1	BCL11A	0.238758767637685	3.32158354261674	2.31181191994457	0.0623856804555213	0.238033234990889	-3.99329627281236
Q99676	ZNF184	0.111709857115247	3.33841838577507	2.15655285728123	0.0768328756059379	0.261054836868359	-3.99363410274535
Q96LX8	ZNF597	0.171234898293212	3.37888906984938	2.06326669156585	0.0871457093212413	0.275154271028187	-3.99504740321408
Q9HA77	CARS2	0.133837219379758	3.37044226529643	2.3098559073085	0.0625488402984586	0.238387830486723	-3.99710691912444
P51530	DNA2	-0.0555390573897849	3.32629665840883	-2.56241244091756	0.0447849008866005	0.204428269844445	-3.9996498778509
Q8WV93	LACE1; AFG1L	0.147911553444934	3.41142430672482	2.06286192312381	0.0871934361716063	0.27517401987189	-4.00002119104029
Q9Y5A6	ZSCAN21	0.116498491926403	3.36955260713934	2.06163179181904	0.0873386474960057	0.275329004930458	-4.00069192506344
Q6ZRY4	RBPMS2	0.0917984497766944	3.47160200511403	2.23503107828275	0.0691384022755717	0.248661605160567	-4.00091225763885
Q9Y2Z4	YARS2	0.121267186794492	3.37639450350622	2.29528176601196	0.0637787275794737	0.2411609881603	-4.00163084324097
O14920-1	IKBKB	-0.0905080012846795	3.25155048036172	-2.22830725193907	0.0697650686810839	0.249760899169984	-4.00179775241439
O00148	DDX39A	0.0804485266309938	3.25678490141424	2.39614055339637	0.0557606586002164	0.224800721377225	-4.00202843806784
Q13492-1	PICALM	0.0773890157956857	3.32054122023223	2.49828552997847	0.048717921115587	0.212245253150928	-4.00285820874604
Q9NVF7-1	FBXO28	0.0767777778872319	3.36958262052586	2.18389026388622	0.0740562337570602	0.256502973171396	-4.00404242429041
Q9NRZ5	AGPAT4	-0.14303881467106	3.37024743600059	-2.23099306885219	0.0695140405058204	0.249211083533016	-4.00491024138027
Q155Q3-1	DIXDC1	0.0917992182789729	3.35972566519471	2.19548501625724	0.0729102189705258	0.25518576639684	-4.00541123347289
Q9NQ48	LZTFL1	-0.0789675357666038	3.11305061190939	-2.30821368508733	0.0626861714966666	0.238555708195648	-4.0055404400019
Q5H9R4-1	ARMCX4	0.107465737752858	3.38033875769299	2.08114185199548	0.0850645550042433	0.271597588574141	-4.00575211051994
Q96AY4	TTC28	-0.0490195599339135	3.2516551313662	-2.48646179381733	0.0494824743341975	0.213531650510968	-4.0064501418344
Q15906-2	VPS72	0.0926257495668287	3.34189869669345	2.10876006207171	0.0819490285999718	0.266563508101709	-4.00759576301895
Q9Y6R4-1	MAP3K4	-0.0612707416622301	3.37937826745807	-2.48216203364819	0.049763665117201	0.214216296964314	-4.00959290634052
Q9Y2V2	CARHSP1	-0.120246302960644	3.34394289275254	-2.21239149300004	0.0712721454419469	0.252330014708735	-4.01374211334497
Q9UHJ6	SHPK	-0.0643259220222453	3.3345060617357	-2.34495528796994	0.0596880190780077	0.231861510058975	-4.01434762515283
Q8IUX4-1	APOBEC3F	-0.178207344313489	2.78285884230095	-2.04921303465927	0.0888185923780881	0.277675729716663	-4.01502989190433
Q9BRS8	LARP6	-0.146496018054473	3.32685852013476	-2.04980306508333	0.0887476999420797	0.277567205036949	-4.0151943977523
Q96B01	RAD51AP1	-0.105210835849677	3.298834787093	-2.20835046761479	0.0716601660605811	0.252923075468234	-4.01525629942462
Q9NVS2-2	MRPS18A	0.146088914457199	3.3660131469262	2.06325399953995	0.0871472054496801	0.275154271028187	-4.01639528995695
P36507	MAP2K2	-0.09942827617244	3.22525967907239	-2.28839352128215	0.0643688190475762	0.242552838768666	-4.0166900362311
A6H8Y1	BDP1	0.0966883067590451	3.3656397812459	2.09559716478614	0.0834189693797502	0.268914226892376	-4.01707369120122
P53597	SUCLG1	0.157604016536362	3.33365765347037	2.44108643477759	0.0525370926552143	0.218565794016857	-4.01710281530723
Q08623-4	HDHD1; PUDP	-0.114740954730518	3.29085449503331	-2.15797160428839	0.076686151727612	0.260787303215532	-4.01770816323362
Q96PK6-5	RBM14-RBM4; RBM14	0.12746077025853	3.36439600130608	2.13719642539096	0.0788639676427486	0.263406338596068	-4.01891867416437
O15040	TECPR2	-0.0802632706470397	3.35120606027744	-2.14590973544462	0.0779428790356461	0.262634558414216	-4.02048192476118
O75449-1	KATNA1	-0.0808204978522134	3.29689982690091	-2.28287626070866	0.0648455901992139	0.243116143519674	-4.02108787132574
P10398-1	ARAF	-0.0692555972088746	3.2523029515676	-2.25062697139634	0.0677073645384813	0.247239838524145	-4.0215245595725
Q9Y6K9-2	IKBKG	-0.0717777836456557	3.2166917775691	-2.26418135896025	0.0664887879481826	0.245359298286896	-4.02169563593219
P61981	YWHAG	-0.083076660686537	3.26615442251852	-2.45258167512025	0.0517447662885128	0.2168136793913	-4.02305821885114
Q9Y3I1	FBXO7	-0.113382287177482	3.2348471367597	-2.05840870836436	0.0877202956265867	0.275481347513395	-4.02351750905512
P46779	RPL28	-0.0882315291014767	3.34279395847457	-2.73060865233583	0.0359980964716696	0.18424109148142	-4.02521549499894
O14732-1	IMPA2	-0.137744349099196	3.40270726797501	-2.0534491678579	0.0883109036398072	0.27642645969996	-4.02691384793512
Q13418	ILK	-0.0877559709713954	3.34476748236821	-2.52453225490116	0.0470653448571966	0.208928946933333	-4.02722056136273
Q9H4M9	EHD1	-0.103821237417715	3.21748040033224	-2.56601749879591	0.0445741073189545	0.204040901760751	-4.0279936152228
Q15532	SS18	0.0644026723035474	3.39256286933692	2.24816690893932	0.0679310222981938	0.24770285317098	-4.02827263294572
Q8TE59	ADAMTS19	0.0936171028165631	3.39472785344773	2.11664134004766	0.0810817090522195	0.266501322835339	-4.02830330139997
Q9NVR7	TBCCD1	-0.129985811854148	3.31424049002888	-2.02293473802137	0.0920354589959113	0.283572707396238	-4.02863532709365
Q9H488-1	POFUT1	0.0955022781996052	3.23050096270589	2.16349425789579	0.0761177696508806	0.259555791100656	-4.02896560390176
Q9Y3Q8	TSC22D4	-0.108420726115518	3.13232376973339	-2.11460534503232	0.0813048552005793	0.266563508101709	-4.02927816224602
Q86WA6	BPHL	0.177556571798492	3.42740929953201	2.30194656901469	0.0632131764417869	0.239728862907261	-4.02972697115398
Q6P5R6	RPL22L1	-0.125078271252236	3.44174093233033	-2.2910793467946	0.064138055909135	0.242039923725963	-4.03006457900414
O00442	RTCA	-0.0622953470982689	3.29218525573425	-2.42924772850755	0.0533665577453844	0.220122704850855	-4.03103453857486
Q8IWF6	DENND6A	-0.0868797375262822	3.16793029482166	-2.14894159855706	0.0776249958338825	0.262467592788694	-4.03135485993335
Q13144	EIF2B5	-0.0646677588655245	3.22384050553261	-2.37904168171146	0.0570413819305802	0.227127087631475	-4.03230457793933
P11217	PYGM	-0.0912229822579231	3.2974053281123	-2.13446940999717	0.0791545492583844	0.264146890783091	-4.03260493132366
Q01432-4	AMPD3	-0.168052145351926	3.09046626534844	-2.04726422724928	0.0890531551593432	0.277811863953465	-4.03267827871313
Q9Y613	FHOD1	-0.106926854644688	3.28975642862977	-2.53963290783043	0.0461417385875787	0.207785022553171	-4.03416186711647
Q86V21-1	AACS	-0.0935220321514113	3.354528297058	-2.51873269888279	0.0474252900729219	0.209790428192196	-4.03458016082307
Q9NV31	IMP3	0.0793341181292749	3.31223837433565	2.19064073718988	0.0733867650412041	0.255687221342469	-4.03634642938037
P82663	MRPS25	0.141510096878829	3.34202092686348	2.20687698057128	0.0718021973891831	0.252923075468234	-4.03654505452571
Q8N6N7	ACBD7	-0.173773139132684	3.24344907887648	-2.01899315215565	0.0925281461025914	0.284309203385819	-4.03671667822916
Q9H9K5	ERVMER34-1	0.124624233604709	3.43039404840929	2.01865166198586	0.092570958036728	0.284309203385819	-4.03684061165806
Q9NVV4	MTPAP	0.0940922255193908	3.4378593470743	2.38214072993515	0.0568069744126476	0.226682700855059	-4.03740784895414
O95073-1	FSBP; RAD54B	0.156536054173331	3.46028170243755	2.01477271836525	0.0930586757076091	0.284781076995922	-4.0377112008449
P22061-2	PCMT1	-0.0848227625596349	3.18784866319829	-2.43021396970561	0.0532983417169782	0.220077975055251	-4.03881436032185
Q9H1Z4	WDR13	-0.0817924643830393	3.22384228602367	-2.10761395906236	0.0820759496809402	0.2667033824448	-4.03986411248016
Q96CM8-2	ACSF2	0.143020847610676	3.18403323831367	2.21891780780476	0.0706501004990308	0.251287700986817	-4.04019612905352
Q9UKV3-1	ACIN1	0.201354878272133	3.32929690886879	2.12077075357813	0.0806310620308357	0.265722297208149	-4.04041632013222
Q9H147	DNTTIP1	0.0790862772390518	3.38593171115933	2.121965851079	0.0805011228709741	0.265649745832031	-4.04050186168136
Q5BJF6	ODF2	0.120306504682838	3.18909602965881	2.01976813609499	0.0924310629403278	0.284220887726731	-4.04126435082321
O43390-1	HNRNPR	0.098333145219628	3.34043373595065	2.85005455078523	0.0308956029856907	0.173037790388982	-4.04316232345512
Q5T3J3	LRIF1	0.0919982447422625	3.3434955228235	2.23995673663385	0.0686830558778432	0.248661605160567	-4.04402410480782
Q14494-1	NFE2L1	0.160588761508486	3.42132058791579	2.00792222685632	0.0939264366690111	0.285736042768974	-4.04407269131933
P46778	RPL21	-0.101215359456522	3.34680516616197	-2.74618598699335	0.0352837548058598	0.183399029045093	-4.04410788870574
Q9BT30	ALKBH7	0.148159467385207	3.40735144402493	2.16261105217389	0.0762083735366754	0.259555791100656	-4.04426477196393
P10588	NR2F6	0.0805726975263973	3.33078199899768	2.11427799225196	0.0813407923306747	0.266563508101709	-4.04581610062223
Q8NHU6	TDRD7	-0.193295537926888	2.93248366269599	-2.09742604558699	0.0832131184071654	0.268691517011689	-4.04981816072464
[truncated: 5,673 more rows]
