# Supplementary material for: Thalidomide promotes degradation of SALL4, a transcription factor implicated in Duane Radial Ray syndrome
Source: eLife journal article supplement (doi:10.7554/elife.38430), 2018-08-01
Supplement: supp [file elife-38430-supp-v1.zip › elife_poa_e38430_Figure_1_source_data_3.csv]

	ID	logFC	AveExpr	t	P.Value	adj.P.Val	B
Q9UJQ4	SALL4	-1.64511482178145	3.46868745800251	-38.2084274471821	7.22251180790604e-08	0.000554111105902551	7.54619667329553
Q9H8Y1	VRTN	-0.468087028540332	3.46183811335561	-17.2853719650686	5.40728099978728e-06	0.006914109971728	4.58888027871113
Q8N5C7-1	DTWD1	-1.82235878028235	2.98589208955144	-32.0342395795377	1.89165801739575e-07	0.00072564001547301	4.07506042730984
O15060	ZBTB39	-1.65667254343374	3.04728834554266	-20.2070437318158	2.32285868702777e-06	0.00356419436937541	3.80302583240259
Q8NEG4-1	FAM83F	-1.30886914834753	3.4034273577085	-27.1526653412947	4.66090221287009e-07	0.00119194805923798	2.40865240032291
O00622	CYR61	0.359773527493458	3.3412163438426	10.131061761677	9.34252202316263e-05	0.0895947862021296	1.94574072943377
Q96JP5-1	ZFP91	-1.68261007456096	2.75641017051467	-22.2887003913786	1.36437636135509e-06	0.00261687386107907	1.80322734083262
P51157-1	RAB28	-0.766078457963592	3.19683993437198	-12.2902806031276	3.36694163717953e-05	0.0369016803434877	1.19776076984245
Q9UBW7	ZMYM2	-0.199489056411299	3.36757356901768	-8.4926638341369	0.000233705242539685	0.179298662076447	1.09694453617426
P49454	CENPF	-0.0858427433432628	3.31801771861966	-8.8021466443516	0.000194302292010559	0.165631909367224	0.982387022502937
Q99590-1	SCAF11	-0.122395366035015	3.33525845471657	-7.84980950549421	0.000349751978161374	0.223608098037839	0.798519171908485
Q92833	JARID2	-0.161666043727927	3.38968072100017	-7.42206651489001	0.000464768958657926	0.268894987238069	0.596031396530445
Q6W2J9-1	BCOR	-0.195310995139105	3.21868683718437	-7.28478566258541	0.000510676107128647	0.268894987238069	0.481074379167167
Q8NEY1-2	NAV1	-0.102229926931297	3.40830222849448	-7.24286904092144	0.000525733160658372	0.268894987238069	0.233464284717012
Q5TGY3	AHDC1	-0.161021205476563	3.37108250429411	-6.67581335686296	0.000790200268345135	0.326638943865661	0.103894182356234
O95983-1	MBD3	-0.198803170965629	3.351230482007	-6.56423347216411	0.000859014530119787	0.326638943865661	0.0472345036348392
Q9BWJ5	SF3B5	0.233772307521126	3.27022148975951	6.44618364625043	0.0009395319577073	0.326638943865661	-0.040252613347052
Q86YP4-3	GATAD2A	-0.116138062087607	3.38040536471649	-6.63183289576948	0.000816529309255117	0.326638943865661	-0.0647343850374016
Q9H116	GZF1	-0.545773576807688	3.29610586239341	-7.96950654099376	0.000323772099872052	0.223608098037839	-0.116528303739321
P82979	SARNP	0.147759920641681	3.33835906486245	6.33712001607212	0.00102181108612824	0.326638943865661	-0.225591821719682
O95785-3	WIZ	-0.311212877183117	3.25273590424672	-6.60687301148253	0.00083192518991365	0.326638943865661	-0.240364324554917
P07108-5	DBI	0.31052510097841	3.18574658579819	6.17589656583611	0.00115928016185676	0.329407311176483	-0.251700250824854
Q15061	WDR43	-0.0948007363152258	3.33324585676869	-6.45098214845785	0.000936092568030545	0.326638943865661	-0.270648052903179
Q5VWN6-1	FAM208B	-0.095945854853167	3.2883168416998	-6.3560617075689	0.00100693838483463	0.326638943865661	-0.316587349171031
Q5VV67-1	PPRC1	-0.213065905656427	3.37032062141952	-6.03298767754175	0.00129934970572609	0.335943323641337	-0.359365484702393
Q8NHM5-1	KDM2B	-0.0915432142709357	3.37528808984805	-6.25090621474228	0.00109281219544547	0.327572654122664	-0.41905140449123
P58546	LUZP6; MTPN	0.270948287652857	3.07609818748008	5.8729703266625	0.00148008119229849	0.335943323641337	-0.476363088940277
O43291	SPINT2	-0.234247697363817	3.38612089816106	-5.88064123825836	0.00147077868130899	0.335943323641337	-0.478651155903946
P22087	FBL	-0.104677215989247	3.30066051283988	-6.44887318680329	0.000937602388405304	0.326638943865661	-0.489482513752227
A6NHG4	DDTL	0.278875746605073	3.05255199312828	5.73061725953611	0.00166571812113367	0.3651254121525	-0.583863479310717
Q9BTC8	MTA3	-0.155664812299871	3.38482945923858	-5.86583133802435	0.00148879992228956	0.335943323641337	-0.598710938448791
Q13601	KRR1	-0.127437555655236	3.29926413213993	-5.69640307727203	0.00171426866022188	0.365329698922841	-0.690134474623578
Q9H9B1	EHMT1	-0.106432326918953	3.35066606382181	-6.01339649780563	0.00132004296494299	0.335943323641337	-0.706244927204928
P32780	GTF2H1	-0.139460583269628	3.27311247646215	-5.65567547698986	0.00177421124648085	0.367885099540571	-0.757708169034044
P37837	TALDO1	0.0905616644289534	3.32419770096891	5.88316869506328	0.00146772848316505	0.335943323641337	-0.777344703302717
Q5QJE6	DNTTIP2	-0.0917950789115981	3.33258837960561	-5.91296537557531	0.00143231602803576	0.335943323641337	-0.785190638794226
P61587	RND3	0.230672909189328	3.34230866967396	5.35100912895272	0.00230820430817984	0.431915693959896	-0.889250530754327
Q8WXI9	GATAD2B	-0.146153704888098	3.24135901437622	-5.41477731957497	0.00218257216652012	0.41861734153856	-0.895584427059206
O60437	PPL	-0.1291521976025	3.43756966260488	-5.43826144036526	0.00213830725028914	0.41861734153856	-0.932387017095544
Q96IU4	ABHD14B	0.242851708906845	2.3058480617601	5.17413295981176	0.00270274179287451	0.493700834165078	-1.13185716508986
Q96SL8	FIZ1	-0.478525981445377	3.33552950863465	-6.23086686448744	0.00111012630437816	0.327572654122664	-1.13754393517831
P61081	UBE2M	0.131836316973792	3.20913844996187	5.08022870649864	0.00294352443883323	0.513243624880195	-1.16381526877559
Q0VF96	CGNL1	-0.0907586813678378	3.39885778477902	-5.45443316688498	0.00210842780766532	0.41861734153856	-1.16931807941669
P55263-1	ADK	0.100512691240827	3.18608376753282	5.13301129461937	0.00280527841473724	0.500513860415444	-1.27894552420113
P00749	PLAU	-0.247367005581571	3.38357287646494	-4.85125733825147	0.00364153583953451	0.555579360853231	-1.31582534083196
Q99757	TXN2	0.219043126576045	3.28319381144371	4.75698522618129	0.00398290730538683	0.555579360853231	-1.40617638952094
Q9HBE1-1	PATZ1	-0.509894902604741	3.34838584883058	-4.72860586974829	0.00409276046413027	0.558330825238151	-1.42564895687897
Q9UHI8	ADAMTS1	0.3142620188417	3.20742948914652	5.00250879430207	0.00316160847997911	0.527301309965211	-1.43886700894604
P29218-3	IMPA1	0.180811325416316	3.32845920502211	4.80679640063753	0.00379816727221389	0.555579360853231	-1.4729256174804
P04198	MYCN	-0.264712810986478	3.31164716773125	-4.71461766242039	0.0041481826171239	0.558330825238151	-1.48954589619112
O75391	SPAG7	0.13317251535288	3.4338312033811	4.80161508462492	0.00381691855367203	0.555579360853231	-1.51569453769004
Q8WTT2	NOC3L	-0.11552143686043	3.22268164290125	-4.87921665397968	0.00354683752226294	0.555579360853231	-1.55262520842123
Q9HD67	MYO10	-0.175146921587468	3.3745576962801	-4.52125403519993	0.00500955103265492	0.582447986558224	-1.639176019302
P51688	SGSH	0.279517149820837	3.23688415127089	4.52103595599603	0.00501063179260203	0.582447986558224	-1.63940704037204
Q9H8H0	NOL11	-0.0884549519767978	3.32221647153396	-5.04059712474358	0.00305249074415302	0.520415755314267	-1.67550552233122
Q5SSJ5-1	HP1BP3	-0.133673167821648	3.23983932270722	-4.59574789082553	0.00465549238342026	0.578740865897412	-1.70205201759588
Q9Y4C8	RBM19	-0.107633159235221	3.31668867022387	-4.68525766626447	0.00426732954491899	0.55872294340076	-1.73243136074199
Q9Y2H1	STK38L	0.198456043946796	3.28433875584047	4.45798365118038	0.00533458817405309	0.608453804106557	-1.77236725637173
Q9NQS7	INCENP	-0.0985033189407914	3.32378551099061	-4.59104063238133	0.00467699865558388	0.578740865897412	-1.8133829925571
Q9NP97	DYNLRB1	0.211041961886779	3.30988546643896	4.3776486005655	0.00578258071090987	0.627798833134388	-1.85056216180169
Q8N371-3	KDM8	0.174350124747931	3.29519180470215	4.25518396495667	0.00655063920102341	0.627798833134388	-1.8748092431739
Q9H0F7-2	ARL6	0.234737330637768	3.11859870315299	4.24698583678455	0.00660607118600091	0.627798833134388	-1.88128532035098
Q9NYH9	UTP6	-0.114982335045257	3.31917214564504	-4.67815278108774	0.00429674839163775	0.55872294340076	-1.94118607620251
Q9P2M7-1	CGN	-0.11023976571097	3.38813373205458	-4.76554440910438	0.00395044209378861	0.555579360853231	-1.94814409566658
P11362-21	FGFR1	-0.170361444392982	3.40347108570043	-4.19704061976628	0.00695553973102489	0.627798833134388	-1.97397693412367
Q9H2U2	PPA2	0.152424733484027	3.26010737828788	4.59974795956148	0.00463730599176515	0.578740865897412	-1.99761397237452
Q92797-1	SYMPK	-0.0731176015779273	3.29346199329341	-4.7975076863399	0.00383185880080661	0.555579360853231	-2.03325289869119
Q96JM3	CHAMP1	-0.0706518124413595	3.32426462039009	-4.76483729777023	0.00395311265601376	0.555579360853231	-2.03462109329304
Q9BVL2	NUPL1; NUP58	-0.115091642932438	3.33364475400744	-4.33555764586108	0.00603435427872861	0.627798833134388	-2.03621346019904
P46531	NOTCH1	-0.154436279419104	3.40494048886197	-4.20242630917795	0.00691686143179138	0.627798833134388	-2.07565787705605
O95861-1	BPNT1	0.122547072446967	2.86342465553159	4.14272370919089	0.00735968729587914	0.634108117431174	-2.07610982458751
Q9GZV8	PRDM14	-0.148287639852563	3.42417902760966	-4.23362026967438	0.0066975918782112	0.627798833134388	-2.07872153375476
Q9Y3C1	NOP16	-0.121738462428876	3.35746708063641	-4.25880563997356	0.00652631988312812	0.627798833134388	-2.10398870836914
P35968	KDR	-0.25362664079011	3.42145931269659	-4.09968858779183	0.00769889374125181	0.637702636326735	-2.10463705928812
Q96GX2	ATXN7L3B	0.26577863264993	3.34692030823462	3.98777950023673	0.00866722276108149	0.652299696702783	-2.11113920297952
O15020	SPTBN2	-0.0921823591101195	3.24778517239595	-4.53540402641908	0.00493999259172643	0.582447986558224	-2.11275922376564
P07355	ANXA2	0.117764571821426	3.01698418866775	4.35103727390919	0.00594033453171692	0.627798833134388	-2.11814730614543
Q8WXX5	DNAJC9	0.213740920405391	3.17687080438239	4.17212484035085	0.00713770845933811	0.629759795160312	-2.12341092898301
Q6P996-1	PDXDC1; LOC102724985	0.0883812938076189	3.39027292878835	4.35941801133419	0.00589012942655936	0.627798833134388	-2.19423449085623
Q16775-1	HAGH	0.232370906967851	2.9281061283959	3.89243925314377	0.00960203693702712	0.652299696702783	-2.21373624455024
P51511	MMP15	-0.181642167952589	3.35690864771766	-3.88740403903483	0.00965449195355363	0.652299696702783	-2.21700339811086
Q9P2P1	NYNRIN	-0.117721678051258	3.4208567146459	-4.0494790096107	0.00811730034330541	0.648707585769157	-2.21894436161706
Q15631-1	TSN	0.149538420840334	3.36837504851439	4.16063715334037	0.0072235221551235	0.629759795160312	-2.25117933285353
Q9NZ20	PLA2G3	0.238179413734324	3.41383856414403	3.81279004520455	0.0104710126795135	0.652299696702783	-2.27915933639073
P17302	GJA1	-0.206833899842503	3.43935100362589	-4.06558779397418	0.00798031396003927	0.644473354751803	-2.28522490472265
O43252	PAPSS1	0.116427073964116	3.34719311607394	4.2521943784896	0.00657079184154663	0.627798833134388	-2.30848245168926
O00219	HAS3	-0.314539722045617	3.39797755816783	-3.91421584239937	0.00937885720901894	0.652299696702783	-2.31064099855936
O96013-1	PAK4	0.109500454466333	3.3807514390341	3.956986054082	0.00895739509264612	0.652299696702783	-2.31862491194656
Q9UKI2	CDC42EP3	-0.291212976827376	3.37231864274333	-3.79217195597583	0.0107101984762103	0.652299696702783	-2.32835783815551
Q9NR45	NANS	0.0957463084717776	3.18607166322223	4.0662500972222	0.00797473824258922	0.644473354751803	-2.33104194565085
Q9HAU0-6	PLEKHA5	-0.0660291394787707	3.39755276744037	-4.32460932174419	0.00610187643634968	0.627798833134388	-2.33352233070504
Q9UEE9-1	CFDP1	0.103760266899986	3.35636515974814	3.94843077049031	0.00903995498129663	0.652299696702783	-2.34145305334089
Q9Y4A8	NFE2L3	-0.252760487594757	3.38766710750804	-3.78875733002163	0.0107504029210784	0.652299696702783	-2.36122078094055
A3KN83-1	SBNO1	0.0872752668026956	3.38175945331675	4.16884476419252	0.00716209202795863	0.629759795160312	-2.37067773746866
Q9H501	ESF1	-0.0628516041441846	3.30533960899325	-4.25252392076856	0.00656856695690702	0.627798833134388	-2.40541341500154
Q99426	TBCB	0.163889315289298	3.32886503474128	3.74496404724921	0.0112814168489794	0.652299696702783	-2.42178906428655
Q15121-2	PEA15	0.180706249291623	3.34656426853087	3.66936018602229	0.0122692003556004	0.652299696702783	-2.43698210223195
P63241-1	EIF5A	0.201398215368146	3.30105547541542	3.7818508454775	0.0108322427470736	0.652299696702783	-2.44548341435302
Q969T9	WBP2	0.229411178345676	3.29410571432496	3.78557035172866	0.0107880806872583	0.652299696702783	-2.46494145598211
O43490-1	PROM1	-0.105397027751769	3.38974497148584	-3.82332602928989	0.0103511189326515	0.652299696702783	-2.47870692624148
P30626-1	SRI	0.180488167312939	3.29618992748483	3.7597037523348	0.0110994573911028	0.652299696702783	-2.48757108581759
Q8NEJ9	NGDN	-0.111619858787853	3.29176725886579	-3.76415278794919	0.0110451865429275	0.652299696702783	-2.49968528561563
Q92802-2	N4BP2L2	-0.158707909477575	3.2611020257093	-3.59921072361834	0.0132734809774718	0.652299696702783	-2.50145091752974
Q8IY63-1	AMOTL1	-0.190887245033651	3.24396668999617	-3.60606259255378	0.0131714231406946	0.652299696702783	-2.50433775863863
Q12802-2	AKAP13	-0.0673764570363985	3.35431187983631	-4.34067814259711	0.00600306701237681	0.627798833134388	-2.50749667568133
Q9UKN8	GTF3C4	-0.0818575249994125	3.29052798467382	-4.22891536877766	0.00673015144900944	0.627798833134388	-2.51722990474401
P62258-1	YWHAE	0.0720067113833918	3.30025087570614	4.54352664556015	0.0049005626482393	0.582447986558224	-2.51766096256429
Q8TEY7-1	USP33	-0.12396401656603	3.33639120055685	-3.78229974123882	0.0108269021576495	0.652299696702783	-2.51785862718452
P51911	CNN1	-0.106387589329425	3.42410502560898	-3.8096110604351	0.0105074950875945	0.652299696702783	-2.51927037362122
Q8NC42	RNF149	-0.328372559419056	3.25266361195585	-3.70668425670033	0.0117698826125536	0.652299696702783	-2.52298499102457
O75052	NOS1AP	-0.122937517162588	3.36327177439715	-3.83112916443342	0.0102633223901005	0.652299696702783	-2.5631699665919
P54198	HIRA	-0.0687878555869055	3.30176681565992	-4.01947545816588	0.00837961714130102	0.649378007152136	-2.56959060497662
Q9H582-1	ZNF644	-0.163527966924642	3.29274605041725	-3.91901609236199	0.00933045428982867	0.652299696702783	-2.58062244149787
Q99447-1	PCYT2	0.114046531385423	3.34619102390205	3.79649515888572	0.0106595394351711	0.652299696702783	-2.58280363496417
Q8IYR6-1	TMEFF1; MSANTD3-TMEFF1	-0.334715155981249	3.30401902132579	-3.78161711796346	0.0108350246196124	0.652299696702783	-2.58898084151141
P09874	PARP1	0.0746584498530469	3.22995781774574	4.77152047911703	0.00392795459349007	0.555579360853231	-2.59101479575512
Q9NYJ1-1	COA4	0.22937715016673	3.34754733522041	3.52114656545238	0.0145011092585085	0.652299696702783	-2.59372542932328
Q13277-1	STX3	-0.245895240435863	3.31019311106415	-3.62920207637006	0.0128332232588865	0.652299696702783	-2.5947252089995
Q9HD15	SRA1	0.147494719932002	3.3352723230903	3.68207514797014	0.0120964713626214	0.652299696702783	-2.59941323579095
Q96T37-1	RBM15	-0.0675950279206058	3.29761605991824	-4.03467908718259	0.00824551163232826	0.649378007152136	-2.60434796140623
Q659A1-1	NARG2; ICE2	-0.0833662702159704	3.34479872062374	-3.81663184526301	0.0104271144036907	0.652299696702783	-2.61060127295221
P48637	GSS	0.0832702629499598	3.22105371257527	3.91707581406903	0.00934998481120243	0.652299696702783	-2.61281858712224
Q96KP4	CNDP2	0.0888824852231422	3.35352927847609	4.02657377918761	0.0083167001322311	0.649378007152136	-2.6379937173267
Q13772-4	NCOA4	-0.132427020688059	3.36672350191183	-3.5607286899604	0.0138634262602534	0.652299696702783	-2.65992631807476
Q96T23	RSF1	-0.0646303366762524	3.30901730656807	-4.26584817326713	0.00647932344597605	0.627798833134388	-2.66606569603542
Q8IVL1-1	NAV2	-0.0887797011259846	3.41623794954695	-3.86010657556617	0.00994456758532338	0.652299696702783	-2.68193720660757
Q6GMV2	SMYD5	0.119459273669047	3.42101018629553	3.55932249222214	0.0138855344084701	0.652299696702783	-2.70151128118638
O00159-1	MYO1C	-0.102105816559101	3.28061547891917	-3.89558833679873	0.0095693947697979	0.652299696702783	-2.70372594896898
Q9P258	RCC2	0.0969870831775035	3.41727930812505	4.44708656220985	0.00539296906663789	0.608453804106557	-2.70736851377985
Q70EL1-1	USP54	-0.10213153866336	3.31179719364478	-3.58218133310097	0.013531000215234	0.652299696702783	-2.71059791535926
Q9Y2F5	KIAA0947; ICE1	-0.0872842447280936	3.35013168308715	-3.73478831001604	0.0114089965690341	0.652299696702783	-2.72606913105136
Q9ULM6	CNOT6	0.142810627031611	3.30278750393874	3.44963101327176	0.0157383355028828	0.652299696702783	-2.7337535369535
P21266	GSTM3	0.13387583489864	2.13283960416723	3.50144527704728	0.0148307112094568	0.652299696702783	-2.73564482531018
Q9HCK1	ZDBF2	0.108419392739181	3.21830257529952	3.58017929783361	0.0135616418400655	0.652299696702783	-2.73951195137286
O60684	KPNA6	0.13927116119316	3.29537392782021	3.53720474287105	0.0142385229260154	0.652299696702783	-2.74963455295214
Q9BXB5	OSBPL10	0.111808993375715	3.46576633012239	3.49742190037755	0.014899049292277	0.652299696702783	-2.75558027910257
P28908-1	TNFRSF8	-0.215204634133577	3.41439224514875	-3.31058648318322	0.018496425156593	0.652299696702783	-2.78530355730037
Q9NQB0-5	TCF7L2	0.524934969476326	3.39681084222728	3.3028868644991	0.0186642087129417	0.652299696702783	-2.79968726860142
Q13233	MAP3K1	-0.162597741546889	3.35170606508717	-3.32462403155768	0.0181948363462542	0.652299696702783	-2.80570349045802
Q86X52	CHSY1	-0.313368192539948	3.21228611471661	-3.28388067113594	0.0190856757304346	0.652299696702783	-2.81142208659726
O95602	POLR1A	-0.045097287206844	3.32089830018525	-4.21717359870635	0.0068121973111168	0.627798833134388	-2.82438878101867
Q9BZQ8	FAM129A	0.123885327627345	3.32291134344962	3.5130824592755	0.0146350190146809	0.652299696702783	-2.83017507664494
Q9UJ04	TSPYL4	0.249163569028846	3.36200738506667	3.25561159068556	0.0197322741900572	0.652299696702783	-2.83037204599062
Q9H9Y6-3	POLR1B	-0.0588910322105975	3.31946133762243	-3.85608549012938	0.00998812429762382	0.652299696702783	-2.8622289802446
Q92785	DPF2	-0.0979012394259333	3.33878654689872	-3.61497026442471	0.0130400596528898	0.652299696702783	-2.87383282681898
Q96T58	SPEN	-0.0519617689122109	3.25202551639228	-4.09582167270664	0.00773023268748519	0.637702636326735	-2.88608905221525
Q9H0R4-1	HDHD2	0.136731027584322	3.32526060834525	3.25256621318146	0.019803372183589	0.652299696702783	-2.88946577942316
Q93009	USP7	0.0517946345129226	3.31661105614417	4.13250048234465	0.00743870315026143	0.634108117431174	-2.89656651209609
Q8N4Q1-2	CHCHD4	0.210973248481474	3.08379210206162	3.29774808253628	0.018777131378364	0.652299696702783	-2.89885845810125
Q9H160	ING2	-0.314725348886345	3.30543021748969	-3.19720323835838	0.0211467923925078	0.652299696702783	-2.90128162778944
P58340-1	MLF1	0.207342152783355	3.35679610797437	3.19798897566906	0.0211270323068151	0.652299696702783	-2.90485579419154
Q13617-2	CUL2	0.0876200858084911	3.30276530582598	3.68197848053944	0.0120977741949615	0.652299696702783	-2.90577288963467
Q08462	ADCY2	-0.331156413541876	3.38149682067398	-3.19756337503274	0.0211377329648131	0.652299696702783	-2.90746281964415
P23919	DTYMK	0.084457197649329	3.23363707881315	3.48691876710626	0.0150791156426584	0.652299696702783	-2.91261962240153
P36639	NUDT1	0.169778784534038	3.40443435169262	3.28992652403115	0.0189504695429917	0.652299696702783	-2.92171597312151
Q8WUW1-2	BRK1	0.1194064446771	3.31811443346129	3.35727833479204	0.0175142511895748	0.652299696702783	-2.92688072846993
O94762-1	RECQL5	0.0944211273072355	3.30800056325246	3.5940828895616	0.0133504406214742	0.652299696702783	-2.92715043035332
Q14596-1	NBR1	0.117601293899601	3.29541254917503	3.41538213073063	0.0163723358163512	0.652299696702783	-2.93554997811135
O75925-2	PIAS1	0.132185133150184	3.33259024726093	3.24643455156579	0.0199473885733762	0.652299696702783	-2.93711862953818
Q5T1V6	DDX59	0.104862172303523	3.19797979525577	3.38703685163493	0.0169186743552384	0.652299696702783	-2.93933763417007
Q9C0H9-5	SRCIN1	-0.322519008448339	3.23405965341959	-3.13677410925501	0.0227296854033396	0.652299696702783	-2.95114396478998
P82970	HMGN5	0.128253970784476	3.26248205811737	3.54991416253623	0.0140344731072851	0.652299696702783	-2.96520871018778
P21860-1	ERBB3	-0.241623664302504	3.42575453368025	-3.13624481985666	0.0227441172001913	0.652299696702783	-2.97549713564137
P04083	ANXA1	0.184119289108256	2.96467164775186	3.15499317113981	0.0222390454571848	0.652299696702783	-2.97945116140836
Q9HCL2	GPAM	0.145901977968498	3.25073687491645	3.22567569194687	0.0204436657060277	0.652299696702783	-2.98243238521386
Q69YN2-1	CWF19L1	0.115904512732766	3.24144100375268	3.63198063042306	0.0127932730964833	0.652299696702783	-2.98888998505148
P31350-2	RRM2	0.129055804272091	3.39019039168499	3.62635280738833	0.0128743358378136	0.652299696702783	-2.99188658706968
Q13257-1	MAD2L1	0.217087144112008	3.22990223850567	3.24309142973048	0.0200263996100304	0.652299696702783	-2.99250784849794
Q9NX63	CHCHD3	0.136468860356554	3.31350768539293	3.47285923144317	0.0153239788211084	0.652299696702783	-2.99356585048644
Q9H6Y7	RNF167	-0.151949707842304	3.34049047940128	-3.13461590953668	0.0227885953345919	0.652299696702783	-2.99414908425701
O95197	RTN3	-0.0907853966692213	3.37631048276828	-3.40718421246164	0.0165282930129861	0.652299696702783	-2.99504642478019
Q13363-1	CTBP1	0.130002858630568	3.22859335722293	3.30783298745936	0.018556233315649	0.652299696702783	-2.99870901465349
Q86XP3-1	DDX42	0.0913085216648329	3.36072072789388	3.87027158975784	0.0098354133317877	0.652299696702783	-2.99917006508357
Q32P41	TRMT5	0.0981069645855063	3.38870628168961	3.5868959611412	0.0134591482533431	0.652299696702783	-3.00017662199245
Q92995	USP13	0.150096565664959	3.35023952423457	3.35411524718133	0.0175789193553251	0.652299696702783	-3.00130179697283
Q8TDD1-2	DDX54	-0.0835395496038708	3.32531493621978	-3.64438227868885	0.0126166579188025	0.652299696702783	-3.00217491399807
Q6NW34	C3orf17; NEPRO	-0.125985961093823	3.34965098917673	-3.44671841813075	0.0157911704390745	0.652299696702783	-3.00891801739727
Q16222-1	UAP1	0.122595726719215	3.21363885222803	3.33071608400301	0.0180656599573878	0.652299696702783	-3.01349932780636
Q9BTC0	DIDO1	-0.0592476678555058	3.30706028159425	-3.96820502382181	0.00885042102189974	0.652299696702783	-3.01712054146733
Q9H410	DSN1	0.102575151954259	3.24373469978738	3.28363347239745	0.0190912267454903	0.652299696702783	-3.01824634704823
P17948-1	FLT1	-0.115963214130348	3.41713767209328	-3.27600812631681	0.0192633445054488	0.652299696702783	-3.02433595737481
Q9Y217-1	MTMR6	0.0926147998157441	3.30696031890992	3.34734790366479	0.0177181713755807	0.652299696702783	-3.02435615818797
Q9UQB8	BAIAP2	-0.0622824661734266	3.2914136524121	-3.59803012063626	0.0132911554759589	0.652299696702783	-3.02846054455501
Q92499	DDX1	0.0491934290045565	3.15261275762132	4.11463321284589	0.00757912566319542	0.637702636326735	-3.03731548896646
Q99457	NAP1L3	0.112462524431715	3.42330058242601	3.26960889360437	0.019409119344393	0.652299696702783	-3.04238877369993
Q96KB5-2	PBK	0.101806837181267	2.80854356174454	3.35568238569189	0.0175468465607686	0.652299696702783	-3.05132713310781
P37198	NUP62	-0.137550459120521	3.31860088848724	-3.43730405940074	0.0159633098277191	0.652299696702783	-3.05587922271601
P21926	CD9	-0.245150284815542	3.21558940992039	-3.08080224752886	0.0243135001146222	0.652299696702783	-3.06211416075407
Q6ZVM7	TOM1L2	0.212153727617513	2.50974316224914	3.03394237140145	0.025733487617611	0.652299696702783	-3.06233173667143
Q9BQ04	RBM4B	0.279263264092512	3.27685390616792	3.08063905612619	0.0243182926482671	0.652299696702783	-3.06312978428238
Q9NQC1-1	PHF15; JADE2	-0.114104315736916	3.38368427236065	-3.21213445417555	0.0207747767045083	0.652299696702783	-3.06477855234232
P23434	GCSH	0.13719847890764	3.37342382759041	3.22130777373337	0.0205498257143533	0.652299696702783	-3.07914999116193
Q16774-2	GUK1	0.156705616597131	3.05163479823841	3.17886574827478	0.0216138237615462	0.652299696702783	-3.0795427508724
Q9UP83-2	COG5	0.0880644607696059	3.27418577963679	3.35979462702108	0.0174629959859539	0.652299696702783	-3.09013045157739
O75132	ZBED4	-0.114593518733936	3.27079765426524	-3.15205227679871	0.0223174438077933	0.652299696702783	-3.09275842974573
Q15361	TTF1	-0.0905055235630467	3.32299240653631	-3.49170438856934	0.0149967701879934	0.652299696702783	-3.09423185287859
P52888	THOP1	0.145433485201348	3.29643600583671	3.50233028332521	0.0148157263014218	0.652299696702783	-3.09535905511177
Q86UN3	RTN4RL2	-0.283823038935443	3.23534314466293	-2.99341737727388	0.0270354468622688	0.652299696702783	-3.10096986472156
Q14517	FAT1	-0.0743956507069213	3.37167165622531	-3.55713256948247	0.0139200430355382	0.652299696702783	-3.10098364346587
Q9NUD5	ZCCHC3	-0.140757399795565	3.40354740386715	-3.22861002063035	0.0203726903667201	0.652299696702783	-3.10585981178749
Q8NBL1	POGLUT1	0.106099036811549	3.34034003719375	3.2160849755341	0.0206775673937007	0.652299696702783	-3.11315307298169
Q9UMN6	KMT2B; MLL4	-0.060886195077754	3.32224907885561	-3.53165335725833	0.0143286925937428	0.652299696702783	-3.11662271223493
Q8WV24	PHLDA1	0.217065108512405	3.32635324928722	2.9772822816164	0.0275738688791804	0.652299696702783	-3.12378298531619
Q9NRN5-1	OLFML3	-0.213265619991889	3.38588089241769	-2.98252012792816	0.0273978017118774	0.652299696702783	-3.1343835036499
Q15326	ZMYND11	-0.17247704774534	3.30460465498671	-2.98952849709362	0.0271641510260967	0.652299696702783	-3.13772462624024
P49903-1	SEPHS1	0.0957828056435268	3.43214770303387	3.58912201380348	0.0134253716726051	0.652299696702783	-3.14733007753933
Q76N32	CEP68	-0.139618862121267	3.29671817018165	-3.00234109360583	0.026742642298134	0.652299696702783	-3.15199813158275
Q04864	REL	0.345020763185044	3.30742541487268	3.12638350639458	0.0230148624852883	0.652299696702783	-3.15228945020447
Q149N8	SHPRH	0.0688645674303123	3.30147306665582	3.50037551586596	0.0148488470502998	0.652299696702783	-3.15364910911296
Q99633-1	PRPF18	-0.106323199583569	3.28849133617274	-3.21571178126558	0.0206867288453028	0.652299696702783	-3.15401100982288
O95835	LATS1	0.260317573930981	3.14784825569374	2.93106297119678	0.0291825442038097	0.652299696702783	-3.15776201850948
Q99873-2	PRMT1	0.0703782614539855	3.41378983171392	3.72446840506088	0.0115400468176418	0.652299696702783	-3.16284280041271
Q8NCW5	APOA1BP; NAXE	0.113891631712074	3.14705990590654	3.36092121152587	0.0174401024444167	0.652299696702783	-3.16750833994549
Q96FE5	LINGO1	-0.203121724087283	3.40962228954107	-2.92069619355911	0.0295573432180846	0.652299696702783	-3.16817423627179
Q86VS8	HOOK3	0.123884260887201	3.17303375920823	3.33223676867668	0.018033574835076	0.652299696702783	-3.19620425982462
P36969	GPX4	0.112810854955347	3.33695193363054	3.31878585589914	0.0183195958334261	0.652299696702783	-3.21121814341802
O15111	CHUK	0.121469892212089	3.1911722220143	3.08970939968731	0.0240534945443324	0.652299696702783	-3.21519735808266
Q13164-1	MAPK7	0.133058243529356	3.34773059491262	3.06045901232144	0.024919050255079	0.652299696702783	-3.21941729459212
Q8NFM7-1	IL17RD	-0.163500711117298	3.42527825847797	-2.92401517411273	0.0294367775785086	0.652299696702783	-3.22020850388685
O75367-1	H2AFY	-0.061555358103551	3.30208068315773	-3.49405601895988	0.0149564906455192	0.652299696702783	-3.2208847055965
Q96S44	TP53RK	0.157150463285747	3.27864124235773	2.88350578789277	0.0309459907627981	0.652299696702783	-3.22258750447853
Q9HB71	CACYBP	0.0658459560779279	3.35754372974076	3.7099127313068	0.0117277787549929	0.652299696702783	-3.22592086118026
Q96S16-1	JMJD8	0.20490703419892	3.39908425737065	2.89663783296229	0.030447653276226	0.652299696702783	-3.22842593690222
Q96IV0	NGLY1	0.136248159345786	3.26794746076008	2.99522888260774	0.026975723552319	0.652299696702783	-3.23450217941913
Q14353-1	GAMT	0.178296524934464	2.80994976448478	2.85788631751516	0.031944110673821	0.652299696702783	-3.2365128455299
A8MVW0	FAM171A2	-0.173890692315774	3.28608746864436	-2.86198295499132	0.0317821690386809	0.652299696702783	-3.24468501779441
Q9BRP8	WIBG; PYM1	0.213639496802269	3.45685733657916	3.13150071763881	0.0228739254084713	0.652299696702783	-3.24506808124881
Q9H5J0	ZBTB3	0.140228955490047	3.44989266108059	2.93103619653344	0.0291835054675519	0.652299696702783	-3.24610639990665
P14921-3	ETS1	0.165412669298198	3.42058596745007	2.85504128390013	0.0320571069583579	0.652299696702783	-3.24818224308259
Q96KG9	SCYL1	0.111546108119164	3.25670746235096	3.25171651765102	0.019823260118359	0.652299696702783	-3.25204988237547
O60346	PHLPP1	0.0806984511542544	3.37967293654411	3.34684289462726	0.017728612190443	0.652299696702783	-3.25237775652033
O60244	MED14	-0.0635520243138308	3.32352874694858	-3.37109090412659	0.0172349506180842	0.652299696702783	-3.25296227460599
Q99829	CPNE1	0.230846016589264	3.02180344407779	2.99082310122776	0.0271212308302636	0.652299696702783	-3.25535388902534
Q7LG56-1	RRM2B	0.117284674089184	3.44292102729078	2.95403253813955	0.0283705556445734	0.652299696702783	-3.26106182427065
Q92688	ANP32B	0.127481462657516	3.02137973862949	3.08474186162478	0.0241981192522795	0.652299696702783	-3.26388302533552
P47974	ZFP36L2	-0.177558824892273	3.36267791542343	-3.04382097154794	0.025426692294521	0.652299696702783	-3.26558385803684
P11766	ADH5	0.173567211106224	3.4455773782751	3.44814320441903	0.0157652998473836	0.652299696702783	-3.26653679936715
Q96ME7	ZNF512	-0.243662969351991	3.32613281464387	-3.00730074475783	0.0265814171053167	0.652299696702783	-3.26739366288724
P42680	TEC	-0.225309363361712	3.17011530905516	-2.82752578978483	0.0331727747774456	0.652299696702783	-3.27573110913356
P34949	MPI	0.09442315256726	2.78160532969081	3.2246421607871	0.0204687300404515	0.652299696702783	-3.2781029975263
Q9H1A3	METTL9	-0.345676768055835	3.32802942752534	-2.96743930072633	0.0279081109773134	0.652299696702783	-3.29342532383502
P68036-3	UBE2L3	0.112799021775818	3.34281311958816	3.04919865767262	0.0252613770796318	0.652299696702783	-3.29453508635573
Q86UY6	NAA40	-0.171292518256943	3.32076781414202	-2.8849510913477	0.0308907089857897	0.652299696702783	-3.29827273183706
Q9BWT1-2	CDCA7	-0.110011438482241	3.36774935893575	-3.03019845390207	0.0258508254109187	0.652299696702783	-3.3027100948063
O60911	CTSL2; CTSV	-0.124727523600811	3.39606364814096	-3.1508304344062	0.0223501056401122	0.652299696702783	-3.30815538389994
Q9UKX7	NUP50	-0.075314890657068	3.34097766733224	-3.67681672972272	0.0121675714155079	0.652299696702783	-3.31376316797443
Q5T7W0-2	ZNF618	0.0919651471707931	3.37642430441582	3.08865250265104	0.024084184844135	0.652299696702783	-3.31659080457114
Q9NV79	PCMTD2	0.546177858037273	3.31928582154944	2.79873337556575	0.0343857999039425	0.652299696702783	-3.32790237629265
Q5M775-1	SPECC1	-0.0760222193264913	3.32802678178247	-3.26985636172587	0.0194034592558605	0.652299696702783	-3.33397489800302
Q9Y2S0-1	POLR1D	-0.233623894799018	3.23554102664113	-2.91696137425212	0.0296936628485081	0.652299696702783	-3.33706006546479
Q8TED0	UTP15	-0.08577134305666	3.31427249787327	-3.3415680900927	0.0178380771433319	0.652299696702783	-3.34613019030968
Q9UHV9	PFDN2	0.144155343613945	3.25265426508856	3.08377773990003	0.0242262998229401	0.652299696702783	-3.34680820054469
O00193	C11orf58	0.13129457489926	3.37616476346705	3.21280654449526	0.0207582030298229	0.652299696702783	-3.3537019987632
Q8IXQ4	KIAA1704; GPALPP1	0.124130128494974	3.2808694654358	2.92224032090135	0.0295011838234383	0.652299696702783	-3.35404117113004
Q03164-3	KMT2A; MLL	-0.0731673044170442	3.31051533658267	-3.47557785388171	0.0152762858257495	0.652299696702783	-3.3608842972193
Q9UKL3	CASP8AP2	-0.0805903275848761	3.31021306189376	-3.086555416574	0.0241452084413341	0.652299696702783	-3.36618030567501
P42857	NSG1	-0.199942535258755	3.38742219767565	-2.72298524180653	0.0378142170288343	0.653955463216203	-3.36990633884124
O60232	SSSCA1	0.139234523731784	3.27527375528121	2.95747788195012	0.0282509153975629	0.652299696702783	-3.37593263212456
Q9NZH0	GPRC5B	-0.157545231656706	3.40099542619789	-2.79540502116454	0.0345291155494937	0.652299696702783	-3.37787365924763
Q8NEW0	SLC30A7	-0.191038621737751	3.17424761597905	-2.70622985743166	0.0386217432779749	0.653955463216203	-3.38468384875282
Q13322-1	GRB10	0.144901461227529	3.42115681894886	2.95184424366261	0.0284468336189722	0.652299696702783	-3.39076965649163
Q9Y5A7	NUB1	0.132685427755731	3.191373921093	3.12911631772883	0.0229394768330649	0.652299696702783	-3.3921493574149
P25205-2	MCM3	0.112027062643449	3.39232103977033	3.71489335459309	0.0116631566816779	0.652299696702783	-3.39893680400922
Q9NQ84-2	GPRC5C	-0.164390758256492	3.33857957338814	-2.74497118491212	0.0367823114922394	0.653955463216203	-3.40045595529904
P04080	CSTB	0.14148224291164	2.71623825206717	2.86368814051705	0.0317150273271002	0.652299696702783	-3.40105517298193
Q96I24-1	FUBP3	-0.0546084980993107	3.3257997065056	-3.44003024547657	0.0159132472840731	0.652299696702783	-3.40229150373145
O43166-2	SIPA1L1	-0.0613808461792366	3.3684980938542	-3.46906107587992	0.0153908894312531	0.652299696702783	-3.40439256829146
Q13907	IDI1	0.145177445244837	3.4253439386081	3.08713945650523	0.024128196182701	0.652299696702783	-3.40463695268634
P05186-1	ALPL	-0.116355023458985	3.39554091902572	-3.16901758057163	0.02186935522112	0.652299696702783	-3.41026609534244
Q86VY9	TMEM200A	0.183534935873852	3.35133733352171	2.67829563907531	0.0400099489921453	0.653955463216203	-3.41433857611667
Q96S86	HAPLN3	-0.119235621466567	3.39523773122563	-2.82489598610741	0.0332816063070243	0.652299696702783	-3.4224074668131
Q9NX46	ADPRHL2	0.125191758615302	3.23366683736765	2.92278226846607	0.0294815011344571	0.652299696702783	-3.42269494669693
Q8WUX2	CHAC2	0.112403893550564	3.18117600276198	2.82768139297367	0.0331663475019324	0.652299696702783	-3.42325786769592
P53365	ARFIP2	0.0958601368636396	3.33583692687335	2.92847746767648	0.0292755294803173	0.652299696702783	-3.42405216236727
Q9H082	RAB33B	-0.281103699996915	3.32330218541946	-2.67247501092357	0.0403059647086911	0.653955463216203	-3.42951533546896
Q96CN7	ISOC1	0.0925405515328424	3.25640035775453	2.94683003199189	0.0286224663152158	0.652299696702783	-3.43346112066012
Q6P1X6	C8orf82	0.212653831831063	3.32145250232808	2.72493149531923	0.0377216125632889	0.653955463216203	-3.43419459641589
P60842	EIF4A1	0.0719163532045472	3.33767337650863	3.72252444660535	0.0115649220899649	0.652299696702783	-3.44107070841007
P48507	GCLM	0.158962826639929	3.23494032526347	2.8470206463857	0.0323780228992003	0.652299696702783	-3.44282126795242
Q12913-1	PTPRJ	-0.0816308342527226	3.36724711642243	-3.03149860390741	0.0258100108124758	0.652299696702783	-3.44291526221306
Q96FZ7	CHMP6	-0.217155602545775	3.22977351166177	-2.79693062421296	0.0344633438889772	0.652299696702783	-3.44594832437592
Q14061	COX17	-0.161302637610896	3.2109663148628	-2.82136356536775	0.0334284057672872	0.652299696702783	-3.44600585198763
Q96FW1	OTUB1	0.0822776095124296	3.32327420900342	3.27216470322691	0.0193507512234295	0.652299696702783	-3.4530833615545
P35442	THBS2	-0.255630155171671	3.42180779489207	-2.64180377640344	0.0419054741576358	0.656640918778751	-3.46153859937199
Q6PJ69	TRIM65	0.142294630581379	3.31749454676007	2.75839744351198	0.0361672408116085	0.653955463216203	-3.46785863121048
Q13112	CHAF1B	0.0882625269925328	3.33704457554317	3.17147974352162	0.0218051567617473	0.652299696702783	-3.47332366864422
Q8TDN6	BRIX1	-0.0572438115693568	3.30668588296862	-3.20057246948054	0.0210622056683497	0.652299696702783	-3.47858701356599
O00566	MPHOSPH10	-0.0865055123034526	3.31407447653062	-3.20887667252082	0.0208553216590624	0.652299696702783	-3.47952420213693
Q9Y4B4	RAD54L2	0.0976623769574459	3.2986999167095	3.14120465809579	0.0226092772297032	0.652299696702783	-3.48378102463411
Q96BZ9-3	TBC1D20	-0.277759394278706	3.33182900648573	-2.61079567992158	0.0435925701273923	0.656640918778751	-3.48967655679418
P18887	XRCC1	0.0739846109179129	3.32793988506116	3.23834439803571	0.0201391886202764	0.652299696702783	-3.49092840752452
Q9BTE6-1	AARSD1; PTGES3L-AARSD1	0.118259776696348	3.35789192816214	3.06517044299069	0.0247773394742424	0.652299696702783	-3.49407719318946
O00505	KPNA3	-0.12626134015036	3.35316568170186	-2.73363438411277	0.0373105255130533	0.653955463216203	-3.49412471235048
Q8TBE9	NANP	0.170472904702773	3.28415924065353	2.67444549138981	0.0402054884849871	0.653955463216203	-3.50437346721701
Q6IE81-1	PHF17; JADE1	-0.0942115581013792	3.37595279507405	-3.13277867757114	0.0228388773456604	0.652299696702783	-3.50440823830485
P08621-1	SNRNP70	0.0544688644973932	3.33049276037295	3.47316909274934	0.0153185344954796	0.652299696702783	-3.50518608414258
Q96RS6	NUDCD1	0.059023874422731	3.39751939935793	3.25551539563662	0.0197345156345525	0.652299696702783	-3.50565790832232
A6NE02	BTBD17	-0.172519125239371	3.36285872705368	-2.59268625054982	0.0446116872909471	0.656640918778751	-3.5109827853595
O95376	ARIH2	0.108847697336056	3.3732313848452	2.90325024849243	0.0302000581034705	0.652299696702783	-3.51129042320592
P12755	SKI	-0.181999346951402	3.36643191689094	-2.61077150746265	0.0435939135811116	0.656640918778751	-3.51800767820757
Q8WUX9	CHMP7	0.197919634272034	3.35401321022499	2.87058705983535	0.0314449622028156	0.652299696702783	-3.5185200983459
Q96F45	ZNF503	0.301100714587125	1.13117246658851	2.58919957961228	0.0448108358018903	0.656640918778751	-3.51931805853988
Q92547	TOPBP1	0.0527431178930741	3.27026720393825	3.30711289650232	0.0185719097764304	0.652299696702783	-3.51977829827753
Q9BVM2	DPCD	0.129345690694281	3.2060360287005	2.74123917158187	0.0369552932986103	0.653955463216203	-3.52013291094069
P15374	UCHL3	0.083420445355349	3.25203661711758	3.05551806680735	0.0250686259639535	0.652299696702783	-3.52287632419548
Q8WV22	NSMCE1	0.19861976889541	3.28704017081284	2.75699645940793	0.0362308952946616	0.653955463216203	-3.52667021567772
Q9Y2I6-1	NINL	-0.135887955552906	3.36462882343198	-2.61971613737256	0.0430998288931181	0.656640918778751	-3.52790793888662
Q86U44	METTL3	0.0661038619841629	3.38183038895927	3.13615214343088	0.0227466451925242	0.652299696702783	-3.53142597128188
Q9HCN3	TMEM8A	-0.155301931917954	3.31458173300069	-2.60935900010714	0.043672495392274	0.656640918778751	-3.53180650001964
Q15427	SF3B4	-0.108716753764588	3.29352484018418	-2.72159317597098	0.0378806042511631	0.653955463216203	-3.53456913472872
P36956-4	SREBF1	-0.204670335289118	3.37164154746363	-2.57318545308654	0.0457379039340436	0.656640918778751	-3.53657665299129
P49207	RPL34	-0.0882073374402028	3.37348383737243	-3.08059065401132	0.0243197143009978	0.652299696702783	-3.53907875455709
Q96SW2-1	CRBN	0.120152148776431	3.30945811768021	2.6877375655775	0.0395347664948083	0.653955463216203	-3.54036403045293
Q9NTM9	CUTC	0.123555933738369	3.22746983968947	2.78050911113716	0.0351785470732648	0.653955463216203	-3.5415029784757
O00299	CLIC1	0.157202804326866	3.32873375154848	3.25807072620475	0.0196750697597606	0.652299696702783	-3.54203040676708
Q16512-2	PKN1	0.0752046594360348	3.29135873150107	2.94402732844839	0.0287211552386905	0.652299696702783	-3.54378730865272
Q8IZ69	TRMT2A	0.0981261945574998	3.20873979906222	3.0110802754161	0.0264592731146346	0.652299696702783	-3.54566558555699
Q8IYS1	PM20D2	0.103292276013423	2.52534821221464	2.79995611516374	0.0343333130048341	0.652299696702783	-3.54815044349904
P50995	ANXA11	0.0890757827836787	3.11227551934549	2.9233966318708	0.0294592058379692	0.652299696702783	-3.54829151732948
P35268	RPL22	-0.0765243232690545	3.40310414552506	-2.93252279714715	0.0291301861103251	0.652299696702783	-3.54844473943874
Q9H3Q1	CDC42EP4	-0.121497980817007	3.25628523348467	-2.71669818766484	0.038115052040689	0.653955463216203	-3.55011696835905
Q9UBT2	UBA2	0.0750547440838024	3.33520952866775	3.35781574770132	0.0175032903700537	0.652299696702783	-3.55108881002573
Q9NR31	SAR1A	0.153249720332322	3.32041029870537	2.79854233343681	0.0343940084149316	0.652299696702783	-3.5512414161944
O60306	AQR	-0.0656725278260213	3.30447154558391	-3.41470915324268	0.0163850764066976	0.652299696702783	-3.55443383166496
Q03154-1	ACY1	0.0967278902249295	3.38988590378863	2.89063534650051	0.0306743374102944	0.652299696702783	-3.55516833856646
P30530	AXL	-0.159442404282311	3.38089293540329	-2.5487928388897	0.0471899256093907	0.656640918778751	-3.55680054895871
O60299-1	LZTS3; PROSAPIP1	-0.174962539897778	3.36359266963408	-2.58786768102146	0.0448871627977241	0.656640918778751	-3.5584098381448
Q3YEC7-1	RABL6	-0.0827012875016813	3.30923837274462	-2.9933622330419	0.0270372671870328	0.652299696702783	-3.56050455618679
O76003	GLRX3	0.187444825363467	3.37742847538391	3.29443329872232	0.0188503758601366	0.652299696702783	-3.56535117665185
O95394-4	PGM3	0.0762594689790154	3.29786513487979	3.1828211799505	0.0215121248437692	0.652299696702783	-3.57298187428781
O43747-2	AP1G1	0.0754559037937924	3.31848351556857	3.17108088996759	0.0218155422813667	0.652299696702783	-3.57468479876068
Q7Z628	NET1	-0.106715985012005	3.31757228524246	-2.81667968883285	0.0336241484868736	0.652299696702783	-3.5749880883594
Q9BRX5	GINS3	0.177894568310581	3.30065237454955	2.87806799008059	0.0311549551801954	0.652299696702783	-3.57895228719093
P08754	GNAI3	-0.340220894621455	3.27166156336776	-2.60845152176871	0.0437230616624837	0.656640918778751	-3.5805384750543
Q5C9Z4	NOM1	-0.0738715504184947	3.3236775481743	-2.94173253809133	0.0288022377740479	0.652299696702783	-3.58208723243609
P62140	PPP1CB	0.148333937833683	3.26710261580307	2.64620472931947	0.041671801964262	0.656480625605375	-3.58688939798529
P09493-10	TPM1	-0.107843822737393	3.38791766762156	-2.97473521525665	0.0276599364423704	0.652299696702783	-3.59913944392677
O60927	PPP1R11	0.107809501396406	3.26968953471925	2.73682334477761	0.037161113911778	0.653955463216203	-3.59996295735194
Q9P1Q0	VPS54	0.131153346904468	3.25821854187187	2.57283025434306	0.0457586994316539	0.656640918778751	-3.60044464057242
Q9Y248	GINS2	0.13725952664659	3.33300301610956	2.86632043343959	0.0316116852593094	0.652299696702783	-3.60102166194706
Q15758-1	SLC1A5	-0.222730045326306	3.21545661925666	-2.65736922028039	0.0410853145555539	0.653955463216203	-3.60683378107646
Q9Y281-1	CFL2	0.110592486070421	3.05945599281345	2.88331863036397	0.0309531573187389	0.652299696702783	-3.60894007118023
O60678	PRMT3	0.0837241482306478	3.3649356782715	3.06019698100277	0.0249269578705009	0.652299696702783	-3.60974721285206
P02751-15	FN1	-0.100759121740299	3.28273952828236	-2.83733848285148	0.0327701058278476	0.652299696702783	-3.61006394064032
Q14CB8-2	ARHGAP19	0.120257891003242	3.35045038123646	2.65798493477883	0.041053231109072	0.653955463216203	-3.61191435439466
Q9H773	DCTPP1	0.127479100936583	3.17035782447291	2.745689343547	0.0367491254110888	0.653955463216203	-3.61674282865131
Q8N9I0	SYT2	-0.139998149351161	3.41638841129361	-2.65247969396318	0.0413410619451156	0.656480625605375	-3.62253688293144
Q96EP5	DAZAP1	0.0942067791857396	3.28859463172834	2.98166864789176	0.0274263393489234	0.652299696702783	-3.62622503135575
Q9BX40-3	LSM14B	-0.0998488540419051	3.36808619929801	-2.74882209711906	0.0366047414315242	0.653955463216203	-3.62755834825646
Q8IYB5-2	SMAP1	0.166873237261878	3.39541848606803	2.79421992902917	0.0345803016012225	0.652299696702783	-3.62768562982909
P36894	BMPR1A	-0.169346879533605	3.35682244345129	-2.55696937492362	0.0466977482251435	0.656640918778751	-3.62863878517575
Q8WUH6	C12orf23; TMEM263	0.138942476246023	2.64053499862767	2.66181829000225	0.0408540929844177	0.653955463216203	-3.63212638009881
O00189	AP4M1	0.166383331198075	3.31301280621279	2.48279162163607	0.0513729009144816	0.663179035285209	-3.6373172859917
Q12765-2	SCRN1	0.137142558033364	3.1709197431183	2.89246490002033	0.030605048948134	0.652299696702783	-3.63806502584016
P17812	CTPS1	0.114667056917069	3.31169396357491	3.21525356736265	0.020697983585423	0.652299696702783	-3.63850499645416
P45973	CBX5	0.0773916283346773	3.36672641133333	3.35707570980216	0.0175183858201385	0.652299696702783	-3.63925545534853
O60344-4	EEF1AKMT4; ECE2; EEF1AKMT4-ECE2	0.236309887179632	3.31118950708719	2.44603132437842	0.0538734786683621	0.663179035285209	-3.64181539780976
P36955	SERPINF1	-0.238071513221331	3.12991701552405	-2.4461565632674	0.0538647418329051	0.663179035285209	-3.64322900865697
Q76G19	PDZD4	-0.168422030342188	3.3829221332719	-2.59665550005858	0.0443861362859914	0.656640918778751	-3.64456242880472
Q92913-3	FGF13	-0.256592342708798	3.30708051092381	-2.51329398411095	0.0493923169904171	0.656640918778751	-3.64501850856797
Q96RK4-2	BBS4	-0.0781925040197358	3.33327945552967	-2.90792665493147	0.030026287384846	0.652299696702783	-3.64503008250617
Q8WVC0-1	LEO1	0.147606594804354	3.33706375429879	2.99653388704537	0.0269327889989964	0.652299696702783	-3.6510825306771
Q9Y3A5	SBDS	0.135270540048659	3.06313617440593	2.89401240466923	0.0305465760354924	0.652299696702783	-3.65110577845688
Q9UDY4	DNAJB4	0.125017502744573	3.25170142424701	2.61639839171429	0.0432823858790019	0.656640918778751	-3.65219378308649
Q13325	IFIT5	0.11026691778995	2.79604579090379	2.68485353326219	0.0396792585225039	0.653955463216203	-3.66079185649391
P16035	TIMP2	-0.144893876129979	3.18116470483613	-2.48033408911852	0.0515361371122754	0.663179035285209	-3.66151861939528
Q8NBF2-1	NHLRC2	0.0899614968261796	3.07837483156313	3.05320702271628	0.0251389273127926	0.652299696702783	-3.66188039252927
P49736	MCM2	0.0454946275531314	3.3631954270298	3.49741184195481	0.0148992205785218	0.652299696702783	-3.66192361384683
Q9BSY4	CHCHD5	0.112812328138489	3.31416944431678	2.6706714420568	0.0403981684665332	0.653955463216203	-3.66263772826816
O15049	N4BP3	-0.0850829856454338	3.41313855880658	-2.93229923926515	0.0291381975432817	0.652299696702783	-3.66319926679291
Q96KQ7-2	EHMT2	-0.0918588150983276	3.3400154041637	-3.21540116048638	0.0206943576321461	0.652299696702783	-3.66500457549543
Q7L8J4	SH3BP5L	0.111279723623824	3.34027485616041	2.66547353488671	0.0406651812828241	0.653955463216203	-3.66623948662164
Q99442	SEC62	-0.329999591393348	3.24980584401018	-2.74297141281634	0.0368748927552217	0.653955463216203	-3.67456698256245
Q12840	KIF5A	-0.127408630609148	3.34852097795699	-2.88489850589649	0.0308927184428734	0.652299696702783	-3.67842959585215
O60830-2	TIMM17B	-0.343637736209369	3.22596470774914	-2.45492962215983	0.0532564719753028	0.663179035285209	-3.67861549545895
Q9Y6R0	NUMBL	-0.139897060561935	3.35798889823643	-2.53901571028137	0.0477857835246099	0.656640918778751	-3.6831411920804
Q9UPN3-5	MACF1	-0.129787719680777	3.37444861413807	-2.621550743214	0.0429992380120907	0.656640918778751	-3.68460308341498
Q8NBT2	SPC24	0.269373516242376	3.33030945598401	2.69528239071617	0.0391594573064095	0.653955463216203	-3.68461602601886
Q5H9F3-3	BCORL1	-0.134261916757711	3.14836576790431	-2.4833791055189	0.0513339606317564	0.663179035285209	-3.68541723913151
Q96IY1	NSL1	0.14247727395788	3.2261904813348	2.80541007713401	0.034100260052036	0.652299696702783	-3.6871592314274
P09382	LGALS1	0.218188722476444	1.58794054875437	2.77453822698726	0.0354425928854048	0.653955463216203	-3.68845063563033
Q9BXW6-1	OSBPL1A	0.100762469148644	3.33120302723605	2.89762000698315	0.0304107364979466	0.652299696702783	-3.69044940948808
Q01973	ROR1	-0.0954891101951606	3.39959718736645	-3.02483243138737	0.0260200310839474	0.652299696702783	-3.69107766620779
O95433	AHSA1	0.139744588570827	3.30722676286188	3.17138033796087	0.0218077446135562	0.652299696702783	-3.69212815460916
P51513-1	NOVA1	0.160559851382606	3.31929119193211	2.42699226626028	0.0552194300439904	0.667644697400095	-3.69335287349014
P57081-1	WDR4	0.12642605935425	3.36077509590659	2.80721097455676	0.0340236854871942	0.652299696702783	-3.69855397760548
Q9H008-1	LHPP	0.114433137644851	3.41531351668616	2.51178226838794	0.0494885229060825	0.656640918778751	-3.69968517121909
Q6NXR4	TTI2	-0.160500602179844	3.35387952676297	-2.70042775098685	0.0389057242647311	0.653955463216203	-3.70338244945964
Q9H892	TTC12	0.157904414314036	3.31339704412881	2.62785253006538	0.042655640157447	0.656640918778751	-3.70389633770335
P63272	SUPT4H1	0.287580073248926	3.32750192941016	2.58414279618644	0.0451013694516514	0.656640918778751	-3.70934662139751
Q8WUX1-1	SLC38A5	-0.169383112071951	3.35737079882156	-2.39375093030476	0.0576560946245431	0.667644697400095	-3.70999456496803
P35754	GLRX	0.399287793985963	2.67684581298055	2.67485921093932	0.0401844271160436	0.653955463216203	-3.71019137688617
Q14693-7	LPIN1	0.140115844821681	2.71651563435521	2.42341715330522	0.0554761472943488	0.667644697400095	-3.71339741446439
Q8TDN4	CABLES1	0.160222929438389	3.23072280275375	2.56594200339631	0.0461639994368608	0.656640918778751	-3.71437073107842
Q8N9N8	EIF1AD	0.135192356899644	3.3098972973148	2.58682642080335	0.0449469318187932	0.656640918778751	-3.71998796985858
Q53FA7-1	TP53I3	0.105038270670056	3.43943988396403	2.84251741563921	0.0325597413834986	0.652299696702783	-3.72052791878127
Q9BS91	SLC35A5	0.206435005007979	3.32969460646412	2.36356902189925	0.0599677270740709	0.667644697400095	-3.72369242941035
Q9UHQ4-2	BCAP29	0.216327965211854	3.31879682037995	2.53677354698497	0.0479235668699275	0.656640918778751	-3.72438627847067
P35612-1	ADD2	-0.0734369377205992	3.41765646476186	-3.01274546137755	0.0264056551803541	0.652299696702783	-3.72624202781285
P31150	GDI1	0.105479858157105	3.1254846489772	3.14666676880375	0.0224618053644883	0.652299696702783	-3.72939922118709
Q96F07-2	CYFIP2	-0.115680089169412	3.23464076512872	-2.93813523170945	0.0289298488172362	0.652299696702783	-3.7312480823379
Q99538	LGMN	0.0784649631671863	3.29863655982951	2.71219031246079	0.0383323532151647	0.653955463216203	-3.73703680475923
P31146	CORO1A	0.216415580505933	2.09305643590088	2.7862214304549	0.0349279408284426	0.653955463216203	-3.73848378685019
Q16342-1	PDCD2	0.14922904118853	3.32794585719559	2.59935956973414	0.0442331831391046	0.656640918778751	-3.73949900565099
P06241-1	FYN	-0.183175361533806	3.26006880301086	-2.46741867264828	0.0524031896087684	0.663179035285209	-3.7402028373262
Q15269	PWP2; LOC102724159	-0.0818238968063709	3.30485147175737	-2.94771887158138	0.0285912462894117	0.652299696702783	-3.74065643380969
P01023	A2M	0.25352603348997	2.04297862165299	2.34484484901561	0.0614511214975849	0.667644697400095	-3.74634514058841
P07093-3	SERPINE2	-0.078995675370521	3.35729689260685	-2.75363567893352	0.036384091831191	0.653955463216203	-3.7512936012265
O75084	FZD7	-0.157292654256573	3.44044736861381	-2.4849357174058	0.0512309362291284	0.663179035285209	-3.75163066848469
O75676	RPS6KA4	0.138417012288346	3.26312096884753	2.38370921887633	0.0584144939418132	0.667644697400095	-3.75179445655867
Q8WX93-1	PALLD	0.11506201363683	3.2531218631461	2.85188077743836	0.0321831456991525	0.652299696702783	-3.75423393616241
Q8IWA0	WDR75	-0.0819117563231771	3.31773532316024	-3.21720791112348	0.0206500278864438	0.652299696702783	-3.75941021120292
Q86VW0	SESTD1	0.0764746948569373	3.35839062875161	2.69920737815607	0.0389657427069099	0.653955463216203	-3.75992342080534
A6ND36-1	FAM83G	-0.121083151754308	3.38252698191414	-2.61656193756665	0.0432733673250102	0.656640918778751	-3.76164612883453
Q16649	NFIL3	0.13571468901691	3.17999409629781	2.44033413084513	0.0542725272839449	0.663179035285209	-3.76185815706979
P49916-1	LIG3	0.0639138148397951	3.37427970765346	3.23866414767258	0.0201315692729008	0.652299696702783	-3.76198041678819
Q8N5D0-1	WDTC1	0.149207154155555	3.2400548682213	2.40579771750708	0.0567600610413152	0.667644697400095	-3.7626223577445
Q6WKZ4-4	RAB11FIP1	-0.0624913831205452	3.26531924528768	-2.97724398952253	0.0275751606192361	0.652299696702783	-3.76639544901145
Q86WR0	CCDC25	0.105033099973077	3.34261584745929	2.85381180172528	0.0321060735607493	0.652299696702783	-3.76742005317226
P05937	CALB1	0.241321608478051	3.5167662513407	2.79786034906207	0.0344233286884827	0.652299696702783	-3.76851615517248
P59190-1	RAB15	-0.242948070022077	3.38960496226235	-2.35660738439129	0.0605147668278701	0.667644697400095	-3.76879066694888
Q8TAT2	FGFBP3	-0.179460012340832	3.41960746644605	-2.31209735922929	0.0641397481317666	0.667644697400095	-3.77257204759893
P36873-2	PPP1CC	-0.115722091849225	3.27606947764358	-2.45975724028519	0.0529248891274373	0.663179035285209	-3.77460297045342
Q15434	RBMS2	-0.180222159062557	3.31937727797711	-2.36965134392053	0.0594940794828987	0.667644697400095	-3.77482368970003
P32929	CTH	0.0778515999564775	3.24590537311843	2.70110651424438	0.0388723858232173	0.653955463216203	-3.78199501930335
Q9Y3D0	FAM96B	0.13172757981138	3.33364775047449	2.40016361472074	0.0571772633056909	0.667644697400095	-3.7838685196951
Q96EA4	SPDL1	0.11661049600333	3.29936537283511	2.73755190309646	0.0371270703053511	0.653955463216203	-3.78434120397898
Q8N8N7-1	PTGR2	0.150756528514738	3.26668251497669	2.33698751282043	0.0620851522177256	0.667644697400095	-3.78612287258798
Q8TAG9	EXOC6	0.0747319310380711	3.22582313182399	2.71471138271532	0.0382106602454396	0.653955463216203	-3.78742134132449
Q14919-2	DRAP1	0.1268987379314	3.30030684330313	2.50990008637736	0.0496085864340335	0.656640918778751	-3.78947665034378
Q6ZWB6	KCTD8	0.132815555538142	3.37469450524478	2.51544991289839	0.0492554602120989	0.656640918778751	-3.79446397838455
Q9Y247	FAM50B	0.74799012724113	3.1261682067454	2.28573073895333	0.0663948360499794	0.667644697400095	-3.7953101066997
Q92882	OSTF1	0.109646399562024	3.20558872778327	2.51268536426291	0.049431025537576	0.656640918778751	-3.79676087680085
Q9BSC4-1	NOL10	-0.0655514696500069	3.30820964214829	-2.98591892900238	0.0272842147553436	0.652299696702783	-3.79685337348265
Q15223	PVRL1; NECTIN1	-0.108923454207889	3.37768686514428	-2.67817201009042	0.040016211763557	0.653955463216203	-3.79840849719557
Q9NRR4-1	DROSHA	-0.0716489959199482	3.31228833777871	-2.74026707903132	0.0370004956633623	0.653955463216203	-3.79999147644857
Q92621	NUP205	-0.0632982967653943	3.33161843065804	-3.32586997320036	0.018168333803591	0.652299696702783	-3.80104220308669
Q9BW71-1	HIRIP3	0.115090640163015	3.12231175886964	2.42189838458631	0.0555855900439878	0.667644697400095	-3.80197745603375
P35813-3	PPM1A	0.117925545032546	3.36052798325741	2.68816943861952	0.0395131785108657	0.653955463216203	-3.80383176428712
Q9NRV9	HEBP1	0.135406458688274	3.30332140910116	2.65792882478761	0.0410561537464242	0.653955463216203	-3.80423144602884
Q8NFG4-1	FLCN	0.0816885621910681	3.31869144748498	2.62205595050256	0.0429715822024179	0.656640918778751	-3.81109598099173
Q8TBX8-1	PIP4K2C	0.132723089039339	3.36013381226291	2.55205868549125	0.0469926756368591	0.656640918778751	-3.81383523529602
P10721-1	KIT	-0.161444747242602	3.38124699952544	-2.51978258167229	0.0489816546489955	0.656640918778751	-3.81459275801724
P17676	CEBPB	-0.174258896022882	3.24862099069926	-2.36015481469497	0.0602353539164405	0.667644697400095	-3.81981995232967
Q12923-3	PTPN13	-0.0596825168014103	3.36442734725263	-3.26886193615479	0.0194262148867931	0.652299696702783	-3.82281685553965
Q15544	TAF11	-0.174837825632552	3.29965972528161	-2.38812817100737	0.0580794539258294	0.667644697400095	-3.82926696188626
Q9Y4P1-2	ATG4B	0.140469014544117	3.25650492963949	2.47920486060867	0.0516113297542496	0.663179035285209	-3.83035825186847
Q06203	PPAT	0.0836133266470278	3.34987424655067	2.99069893923248	0.0271253439535684	0.652299696702783	-3.83139458789947
Q96IZ0	PAWR	0.12881084002249	3.43928098289663	2.87832559562073	0.0311450210908347	0.652299696702783	-3.83401972043956
P53680	AP2S1	-0.0868014166419757	3.30829499054364	-2.59615843740737	0.0444143141861835	0.656640918778751	-3.8349094167245
Q96FJ2	DYNLL2	-0.150528173899285	3.36452374930032	-2.67702188664284	0.0400745254186298	0.653955463216203	-3.83557540743541
Q68CZ6	HAUS3	0.0747513563176481	3.34259089451356	2.82339955823868	0.0333437083591133	0.652299696702783	-3.83579660923209
O60341	KDM1A	-0.0655509634403985	3.34495422928659	-3.13426912021237	0.0227980769986706	0.652299696702783	-3.83593671752216
Q9BY32-1	ITPA	0.149019601003268	3.30804442365641	2.3839066924432	0.0583994779320506	0.667644697400095	-3.83629687735774
P60983	GMFB	0.243633020372969	3.42893588104397	2.35445810396493	0.060684723389996	0.667644697400095	-3.83893732199388
Q96RL1	UIMC1	0.07825734837672	3.29091086316167	2.79499805397841	0.0345466838016041	0.652299696702783	-3.84598629733043
P78368	CSNK1G2	-0.16431145927309	3.26775784458042	-2.30633013818546	0.064625999624977	0.667644697400095	-3.84791259081455
Q6EMK4	VASN	-0.196739536362787	3.38626546370734	-2.24150166212954	0.0703674394507507	0.685970769334383	-3.84822947860517
Q8IWZ6-1	BBS7	0.14541538433351	3.27962688036901	2.37515978490639	0.0590685494918192	0.667644697400095	-3.84840968845478
Q8IY17-4	PNPLA6	-0.117561702786575	3.37005438642479	-2.74198554269354	0.0369206277501613	0.653955463216203	-3.84964053967228
P60520	GABARAPL2	0.313242306216487	3.29438663292344	2.34731798246997	0.0612529801996213	0.667644697400095	-3.85167009631891
Q9H5V9-1	CXorf56	-0.121889746795522	3.25811594643515	-2.53791270252755	0.0478535112619197	0.656640918778751	-3.85201015867165
Q9H898-1	ZMAT4	-0.160763431706156	3.36858708111815	-2.28537012715233	0.0664262525632358	0.667644697400095	-3.85585633451523
O43684	BUB3	0.0729912817102876	3.33387415606832	2.99890745024392	0.0268548916232497	0.652299696702783	-3.85748604480025
O14678	ABCD4	-0.159466692521928	3.3718879160882	-2.28904678491389	0.0661066758554198	0.667644697400095	-3.85838281432042
Q9HCE5	METTL14	0.201558425613581	3.37906111233192	2.57913761089737	0.0453909387345	0.656640918778751	-3.86116434622172
P17931	LGALS3	0.0960971486842934	3.14934996686148	2.44198543253931	0.0541565413183793	0.663179035285209	-3.86217466301717
Q49AR2-1	C5orf22	0.120592230245532	3.35887859136485	2.54471112325208	0.0474377049522603	0.656640918778751	-3.86239398250835
O15068	MCF2L	-0.111373538367274	3.33592918450815	-2.5002645567645	0.0502281453319842	0.660978269274413	-3.86373200596558
P78371-1	CCT2	0.0758116292933197	3.33412277769754	3.44829968118337	0.0157624615066239	0.652299696702783	-3.86535028498689
P22413	ENPP1	-0.119828005630243	3.34091781685842	-2.75420987383033	0.0363578680967431	0.653955463216203	-3.86728265628194
Q9NUQ6-3	SPATS2L	0.293675102850815	3.48305477083871	2.51914734883342	0.0490216961611273	0.656640918778751	-3.86827821588803
Q96EK5	KIAA1279; KIF1BP	0.0632579661229405	3.32494037593723	2.83195260071959	0.0329904529669694	0.652299696702783	-3.87411079617647
Q3LXA3	DAK; TKFC	0.118105938882559	3.08970589745096	2.80786051278234	0.0339961130319037	0.652299696702783	-3.87546650833656
Q14566	MCM6	0.0526434144876443	3.40948658077573	3.24615459664424	0.0199539916962587	0.652299696702783	-3.87566679087377
Q15257-1	PPP2R4; PTPA	0.106161456255296	3.37612265854273	2.73428920048286	0.0372797923612972	0.653955463216203	-3.87833802593692
P30042-1	C21orf33; LOC102724023	0.110084494991844	3.22197712068461	2.80476688080506	0.0341276544609648	0.652299696702783	-3.88032503327623
Q15382	RHEB	0.0801037496111553	3.34005956597718	2.71372217026475	0.0382583598053398	0.653955463216203	-3.88712416018103
P05455	SSB	0.0762719121839756	3.37134404339455	3.33772100213828	0.0179183886851988	0.652299696702783	-3.88898549752685
Q8NDI1-2	EHBP1	0.123999661491737	3.36999869826311	2.85637875346581	0.0320039322798746	0.652299696702783	-3.88989571025604
Q07020	RPL18	-0.0688018010085187	3.35852752126546	-3.00506294088108	0.0266540293215601	0.652299696702783	-3.89117080636612
O94868	FCHSD2	-0.142379142682031	3.13172836566836	-2.35752200388154	0.0604425955973129	0.667644697400095	-3.89163700010677
Q7M4L6-2	SHF	0.319077892419805	3.42769764854671	2.1806007791204	0.076250734216694	0.69321830770014	-3.89475981705354
O95372	LYPLA2	0.0999256322056571	3.43327644409284	2.72477932597582	0.0377288440289085	0.653955463216203	-3.89483122971374
Q9NX58	LYAR	-0.102097714553466	3.32904071455319	-2.94162615130897	0.0288060028630105	0.652299696702783	-3.89571977011505
Q8N4V1-2	MMGT1	-0.31599699410477	3.24238620515501	-2.32022525851583	0.0634610183237291	0.667644697400095	-3.89998345195389
Q658Y4	FAM91A1	0.0808926842286297	3.14074101006439	2.53677293868413	0.0479236043085441	0.656640918778751	-3.90173823807518
Q6PI47	KCTD18	0.302868395328548	3.18892878493306	2.29911518051125	0.0652398055453874	0.667644697400095	-3.90211089163664
Q9BZM1	PLA2G12A	0.325250503890663	3.36082167279592	2.32450595526995	0.0631066121502025	0.667644697400095	-3.90305626495674
O43504	LAMTOR5	0.200871852865049	3.26685556963304	2.36248925365974	0.0600522293135003	0.667644697400095	-3.90393776119141
P49588	AARS	0.0442208249233866	3.32440930214994	3.3458399662834	0.0177493675881972	0.652299696702783	-3.90447266791662
P50548	ERF	-0.138649353451039	3.39618434471713	-2.41598485926405	0.0560139176368119	0.667644697400095	-3.9071964692225
Q9UPN6-2	SCAF8	0.0524374469303943	3.34458674351822	2.88639428900389	0.0308356156628312	0.652299696702783	-3.90919258036592
Q14146	URB2	-0.10092519954113	3.29538729007037	-2.95643542018761	0.0282870564926606	0.652299696702783	-3.9095848978126
Q9H6V9-2	C2orf43; LDAH	-0.0879474296255664	3.35137598771076	-2.67745540996431	0.0400525340761933	0.653955463216203	-3.90979745383443
P53602	MVD	0.0690312384928659	3.40919640741539	2.69972427428778	0.0389403092853694	0.653955463216203	-3.91322276269997
Q6NSW7	NANOGP8	-0.170820402335925	3.43765044965157	-2.20822985768636	0.0735202040307273	0.690707585170939	-3.91499167744402
Q6IEG0-1	SNRNP48	0.234369876175845	3.35725921138614	2.33363694986052	0.0623576232604468	0.667644697400095	-3.91817510600632
O14933	UBE2L6	0.150885663410279	3.29520159812076	2.26083903709277	0.0686006345415154	0.676483378152322	-3.91922924967264
P27348	YWHAQ	0.0658601857556466	3.40532908165667	2.980582691185	0.0274627830035388	0.652299696702783	-3.9206865861506
Q86UA6-8	RPAIN	0.207126308519798	3.25667255280831	2.20245434701957	0.0740824022006952	0.690707585170939	-3.92423560017613
P13693	TPT1	0.0875770541235384	3.32967113705341	3.00245870990839	0.0267388064612492	0.652299696702783	-3.92940136731867
P62314	SNRPD1	-0.12647347970105	3.31346971603896	-2.59585741668679	0.0444313880783054	0.656640918778751	-3.93059154504072
Q9BSJ6	FAM64A; PIMREG	0.141340786555131	3.32195508676647	2.40510607615785	0.0568111017198939	0.667644697400095	-3.93115692704729
Q01105	SET	0.109583069902883	3.45953730160862	2.66061604316109	0.0409164354459638	0.653955463216203	-3.93631901244188
Q32MZ4-4	LRRFIP1	-0.0897314923816994	3.40836287539399	-2.52087812111231	0.0489126804514956	0.656640918778751	-3.94012071987076
P42356	PI4KA	-0.0873748386121126	3.21820683715677	-2.8458942880706	0.0324233705307292	0.652299696702783	-3.94380734986112
P23352	KAL1; ANOS1	-0.131738867446221	3.41115553012597	-2.46727974164995	0.0524126008976956	0.663179035285209	-3.94523516805994
Q96G97-4	BSCL2	-0.385843803243216	3.3144421376082	-2.30443153839963	0.0647869274082269	0.667644697400095	-3.94663586684571
Q16828-1	DUSP6	0.152294161724142	3.43488232993423	2.28454298231238	0.0664983727086541	0.667644697400095	-3.94736620833688
O43681	ASNA1	0.0813935456795716	3.33222794747218	2.77412186050624	0.0354610859070637	0.653955463216203	-3.9526531266947
Q6IQ21	ZNF770	-0.20746743996851	3.39407403815884	-2.12537925748128	0.082030399696467	0.695775512805027	-3.95380498964405
Q15404-1	RSU1	0.131971165786642	3.37551549680496	2.45630598928556	0.053161711106824	0.663179035285209	-3.95586737368236
Q9H583	HEATR1	-0.0739294512335401	3.32285849466754	-3.34222904569451	0.0178243195115211	0.652299696702783	-3.9563321625507
Q92530	PSMF1	0.145455787617376	3.27936662945547	2.33208920027209	0.0624839151623552	0.667644697400095	-3.95802627247312
Q7L190	DPPA4	-0.0669861764764368	3.42841285853586	-2.84992515541431	0.032261405852308	0.652299696702783	-3.95872989765775
Q99584	S100A13	0.105396457887955	3.40280368501109	2.55424527926487	0.0468611059143885	0.656640918778751	-3.96085805326185
Q6NUQ1	RINT1	-0.113994162526226	3.30826518159048	-2.62484620194982	0.0428191853479577	0.656640918778751	-3.96612852861427
Q96DT6	ATG4C	0.114353879302925	3.29014554197981	2.41539285192054	0.0560569911414799	0.667644697400095	-3.96892085622478
Q9NQ88	C12orf5; TIGAR	0.0872257552398514	3.2800559942064	2.44139283103298	0.0541981346480988	0.663179035285209	-3.96925717893028
O75448	MED24	-0.0662465695757063	3.31625892594795	-2.6599696683026	0.0409499957558011	0.653955463216203	-3.97090847495452
Q9UIU6	SIX4	0.102436574426546	3.38169109939879	2.33986477894094	0.0618521767080439	0.667644697400095	-3.97117936344909
Q8IUD2-1	ERC1	-0.112240495371384	3.31183009279986	-2.57558845333998	0.0455974847603295	0.656640918778751	-3.97208361497182
Q9BTL4	IER2	-0.780535227739096	3.07813139610163	-2.09239631790527	0.0856982858846928	0.697991490104712	-3.97395762517778
P16219	ACADS	-0.197040526440221	3.21129657795305	-2.24821615962751	0.0697485901305467	0.682529210399346	-3.97573875247545
P60033	CD81	-0.118570240458789	3.21345158637088	-2.47825514840604	0.0516746597530586	0.663179035285209	-3.97852322790113
O95825-1	CRYZL1	0.0941993678177351	3.1880300880146	2.52415847410425	0.0487067750968071	0.656640918778751	-3.97933330740981
Q8IWE4	DCUN1D3	-0.190427789305297	3.30581792325756	-2.14327120291867	0.08010934859313	0.695366842612303	-3.9809153293618
Q9H3P7	ACBD3	0.0570479127518389	3.26136899966116	2.84219477001707	0.0325728038092612	0.652299696702783	-3.98097896782346
Q4KWH8-1	PLCH1	-0.0755226405061485	3.37203739585768	-2.87771278332475	0.0311686587735064	0.652299696702783	-3.98121893333406
Q96SN8	CDK5RAP2	-0.0512526304003638	3.25238770775961	-2.86097672338009	0.031821862378431	0.652299696702783	-3.98383577136689
Q6ZRI6	C15orf39	-0.102100822472541	3.28299525037208	-2.46092177470855	0.0528452344170028	0.663179035285209	-3.9860226394297
Q14678-1	KANK1	-0.0619846921493581	3.33559439274177	-2.83669831940281	0.0327962117780307	0.652299696702783	-3.98643811220672
Q9UKV5	AMFR	-0.217545400855277	3.26487803610981	-2.09463374753968	0.0854441717535676	0.697991490104712	-3.98735658892412
Q86UA1	PRPF39	0.0772916257582263	3.32996508053847	2.57007401253783	0.0459204131061994	0.656640918778751	-3.99051523634236
P18583-3	SON	-0.153064509874869	3.31197829737009	-2.24725881221686	0.069836474213176	0.682529210399346	-3.99135502409784
O95757	HSPA4L	0.122244293819011	2.39522265136374	2.81849128754649	0.0335482924055717	0.652299696702783	-3.99757278055177
P33991	MCM4	0.0728973889162795	3.38864507440558	3.21065106830553	0.020811408845899	0.652299696702783	-3.99946959587587
Q6P5R6	RPL22L1	-0.143384487719486	3.43441844574343	-2.51924283280885	0.0490156751443621	0.656640918778751	-3.99958900664442
Q14642	INPP5A	-0.25383869775734	3.29405601826629	-2.07640372898952	0.0875375801898453	0.697991490104712	-4.00091461559832
O75398	DEAF1	-0.171497314593463	3.2946412673959	-2.16032456612119	0.0783219299308439	0.695366842612303	-4.00149533318261
Q9Y6K1	DNMT3A	-0.101752180007477	3.27473340973645	-2.32685748533564	0.0629128168857105	0.667644697400095	-4.0045609312035
P48643	CCT5	0.0694113807168269	3.32452108221109	3.42390191850211	0.0162119954615629	0.652299696702783	-4.00465321390082
Q9UBI1	COMMD3	0.128571477933765	2.51530950746395	2.28904716386414	0.0661066430006426	0.667644697400095	-4.00568455940534
Q9NUQ9	FAM49B	0.113214377167603	3.11530236107686	2.54859777705359	0.0472017350625621	0.656640918778751	-4.00683594732802
Q9H2G4	TSPYL2	0.199467616760956	3.31858406374913	2.07778817812607	0.0873767520003569	0.697991490104712	-4.00857440584304
P12429	ANXA3	0.127597878449377	3.45315870254159	2.68042781498577	0.0399021046457576	0.653955463216203	-4.00908343637748
O15530-1	PDPK1	0.0850595310813622	3.25866444735571	2.53722367738583	0.0478958716600775	0.656640918778751	-4.01005446468699
P39748	FEN1	0.0903745733613148	3.25729157334153	2.83008114387909	0.0330673965289825	0.652299696702783	-4.0143257812739
O75131	CPNE3	0.0988744042164359	3.26942422450714	2.63397312172754	0.0423247603625976	0.656640918778751	-4.02206343940125
Q09328	MGAT5	-0.112705467504395	3.15496786619451	-2.28269223887844	0.0666600414765997	0.667644697400095	-4.02242230829417
P43121	MCAM	-0.154569641511679	3.20613408690674	-2.41918337256825	0.0557818082712289	0.667644697400095	-4.02242545334187
Q9UJV9	DDX41	-0.0652854249545229	3.28862378377717	-2.84300963945871	0.0325398245520381	0.652299696702783	-4.02521619151604
Q9NY33	DPP3	0.0599387061610486	3.34499519398259	2.79365957702928	0.0346045329194516	0.652299696702783	-4.0259461939882
Q9NPA8-1	ENY2	0.223733146268524	3.40475759033166	2.47514809684094	0.0518824302377939	0.663179035285209	-4.02639727822183
P84095	RHOG	-0.254500784614694	3.2388866773364	-2.33906647733924	0.0619167231025851	0.667644697400095	-4.0278071209609
Q15004-1	KIAA0101; PCLAF	0.13463732991009	3.34281533665048	2.34638807822924	0.0613274022389836	0.667644697400095	-4.02815580297909
Q0PNE2	ELP6	0.0957375452167449	3.34580938197754	2.33476360440312	0.0622658615384957	0.667644697400095	-4.030893284848
P49005	POLD2	0.0907913648429589	3.31847574382706	2.5531939256782	0.0469243174753607	0.656640918778751	-4.03314626512413
P09601	HMOX1	-0.13297570995323	3.29806939089608	-2.44262989300373	0.0541113468111527	0.663179035285209	-4.03314708900579
Q14195-2	DPYSL3	0.100684901347913	3.47107372161483	3.28623153215505	0.0190329752106142	0.652299696702783	-4.03741108081829
P55060-1	CSE1L	0.0830590630265541	3.37699653747699	3.25087912180078	0.0198428818886942	0.652299696702783	-4.03980767918772
P18433	PTPRA	-0.164277580825823	3.2885710811926	-2.29210222770582	0.0658423299277943	0.667644697400095	-4.04114315780994
P52948-1	NUP98	-0.052717196432263	3.32266142648128	-3.14877603274698	0.0224051425340071	0.652299696702783	-4.04150305091907
O15169	AXIN1	-0.120351345364566	3.36345677126663	-2.2024761009747	0.0740802762035828	0.690707585170939	-4.04189861674366
O00592-2	PODXL	-0.18948690832417	3.40007516226425	-2.88329496955755	0.0309540634576172	0.652299696702783	-4.04370215368256
Q9BV23	ABHD6	-0.239117763123577	3.03588525038689	-2.01407988874903	0.0951035088370772	0.712000315531558	-4.04529209853098
Q05682-5	CALD1	-0.174256943224055	3.3668064274824	-2.05011006147927	0.0906508492545672	0.705368538636562	-4.04791482504119
Q8IZV5	RDH10	-0.188229960285076	2.96118013143202	-2.04081499523214	0.0917785812787965	0.70766359353862	-4.05052481218445
Q9Y6I3	EPN1	0.103157637874258	3.3587911148764	2.48274589297577	0.0513759332806552	0.663179035285209	-4.05101807087581
Q9NYK6-1	C21orf91	0.112648810438631	3.32372504453134	2.26110672728616	0.0685765065533732	0.676483378152322	-4.05161412766123
Q86V25	VASH2	-0.167062963331027	3.45550234833057	-2.03275537637441	0.0927681263263809	0.71036960377837	-4.05264367376352
Q96MX6	WDR92	0.099280266323784	3.29037738418868	2.58358371765325	0.0451336153181495	0.656640918778751	-4.05482902147981
Q86Y13	DZIP3	-0.0657315653173257	3.3053371402304	-2.56297807812678	0.0463395826143996	0.656640918778751	-4.0573346961008
Q5TZA2	CROCC	-0.0739765200753502	3.38371539447141	-2.90288704407033	0.030213600493117	0.652299696702783	-4.05895225026566
Q7Z7L7	ZER1	-0.136967379448761	3.34264743812241	-2.27454457288331	0.0673767127804898	0.67108904626917	-4.06295405007481
P51825-2	AFF1	0.10506906825831	3.32436861610014	2.21726760545481	0.0726494103796986	0.690707585170939	-4.06586317418179
Q9P2K1-4	CC2D2A	0.273709742657366	3.3856193835773	1.99651309520641	0.0973554135843831	0.714774775611695	-4.06592443770401
Q14563	SEMA3A	0.124602852613361	3.37817964905145	2.15808514425051	0.07855425947504	0.695366842612303	-4.0672577115847
O75223-1	GGCT	0.0800508472210892	3.32510258309798	2.58266170775249	0.0451868481965798	0.656640918778751	-4.06807568685548
Q7L266	ASRGL1	0.103257661485088	3.13996996406408	2.36915452610325	0.0595326186899676	0.667644697400095	-4.07337572327094
Q8N5Y2-1	MSL3	-0.091794993886629	3.28998375578665	-2.27666775194814	0.0671891780584174	0.670319082008035	-4.07607182023141
O95237	LRAT	-0.133372567403718	3.41956849004369	-2.17196540339124	0.0771257470862169	0.695366842612303	-4.07611173882402
Q9NQ55-3	PPAN-P2RY11; PPAN	-0.0742856278061947	3.32082166494788	-2.52693900331211	0.0485329720153642	0.656640918778751	-4.07843122582081
Q6DKI1	RPL7L1	-0.135224775647185	3.23427707440559	-2.340917551288	0.0617671641673081	0.667644697400095	-4.07926822583642
O00461	GOLIM4	-0.103223119479832	3.16167376179094	-2.64753785230429	0.0416012971396022	0.656480625605375	-4.0807235593746
P04818	TYMS	0.0747275331546525	3.23066564956275	2.45081030210328	0.0535411612639949	0.663179035285209	-4.08294223413142
O95073-1	FSBP; RAD54B	-0.165217191706754	3.33158040408551	-2.01207416893967	0.0953578955299928	0.712000315531558	-4.08493658198975
Q9Y5J9	TIMM8B	0.244395830541655	3.26293370618007	2.20233145246965	0.0740944137898439	0.690707585170939	-4.08691810171684
Q9ULJ7-1	ANKRD50	0.0868929846471907	3.31233643441629	2.38229770239759	0.0585219461186358	0.667644697400095	-4.09199849698413
P78345	RPP38	-0.0895286406056978	3.32215110669207	-2.51998985508108	0.0489685968943126	0.656640918778751	-4.0940702763103
Q9BW61	DDA1	0.108072539082915	3.30777037661628	2.39159454664733	0.0578180677122794	0.667644697400095	-4.09555741354636
Q8N567	ZCCHC9	-0.155723310407773	3.34172446224251	-2.53115546529387	0.0482706823461482	0.656640918778751	-4.09601839297497
P12004	PCNA	0.117258029667079	3.30030724776473	3.2267909284286	0.0204166581451084	0.652299696702783	-4.10308501814518
Q8NEN9	PDZD8	-0.165387477942538	3.30831403847512	-2.41476968700995	0.0561023697571488	0.667644697400095	-4.10333560552586
Q96A09	FAM46B	-0.141789536436117	3.46184150266906	-2.00116435622042	0.0967538873748011	0.714774775611695	-4.10416920750441
Q9UMY4-1	SNX12	0.110917643415662	3.32290424324996	2.35380596368868	0.0607363921325776	0.667644697400095	-4.10674186806534
Q9NRS6	SNX15	0.107096341857743	3.22378588153487	2.17329723625248	0.0769901126162366	0.695366842612303	-4.10692411923115
P41225	SOX3	0.0842389738478177	3.43192963485463	2.36844194361328	0.0595879415110793	0.667644697400095	-4.10815566811068
Q13523	PRPF4B	-0.0498714942506027	3.31550864638987	-2.91667932894103	0.0297039853784232	0.652299696702783	-4.10939611049345
P62256	UBE2H	0.101726297372372	3.37446256182632	2.29751110998793	0.06537710532099	0.667644697400095	-4.11455786034544
Q969T7	NT5C3B; NT5C3L	0.936258075936995	3.11835478796017	2.12640796539194	0.0819186594514423	0.695775512805027	-4.11673285129006
O95104	SCAF4	-0.155679688414167	3.28711889950537	-2.6415274369412	0.0419201938396596	0.656640918778751	-4.11783387650497
P54578	USP14	0.0728815852866423	3.34071499650893	2.87233925539868	0.0313767722368237	0.652299696702783	-4.1184803267106
Q14376	GALE	0.0801539735123239	3.31998253420437	2.32421693083488	0.0631304749166411	0.667644697400095	-4.12023623245543
Q7Z6M1-1	RABEPK	0.0791472084967074	3.3001894851154	2.5093805945652	0.0496417795739932	0.656640918778751	-4.1246692027154
Q9Y385	UBE2J1	-0.132770380306125	3.07357755157678	-2.25596243295282	0.0690417502021184	0.679959316496345	-4.12487641447515
Q9UK22	FBXO2	0.146769322602303	3.46038324636575	2.11309821100424	0.0833766935208619	0.696474886497503	-4.12519883318546
P50053-2	KHK	0.122605308480567	3.05697923482081	2.12579369737433	0.0819853633797203	0.695775512805027	-4.12541540930102
Q8NFH5	NUP35	-0.0688017452762074	3.35685228542212	-2.58801852314446	0.0448785114679164	0.656640918778751	-4.12666697021233
Q5TB80	KIAA1009; CEP162	-0.134416933876295	3.25923412645231	-2.20368263929205	0.0739624621640948	0.690707585170939	-4.12688651552163
O14613	CDC42EP2	-0.288691760930369	3.37265447378909	-1.98120737831227	0.0993620422329212	0.716105600093805	-4.12829241473652
Q96PK6-1	RBM14; RBM14-RBM4	-0.0480924614474781	3.30555690458647	-2.94645778939278	0.0286355522644302	0.652299696702783	-4.12852370073207
Q13015	MLLT11	0.295487184311939	3.31580824917441	2.18811128662275	0.0754981408082137	0.692419402141054	-4.12973425267747
Q9UGU0	TCF20	-0.0542225838771827	3.34224147964932	-2.91668161502087	0.0297039016947426	0.652299696702783	-4.13059767607515
Q13432	UNC119	0.121369969020844	3.34554620677741	2.08783658369991	0.0862185811965011	0.697991490104712	-4.13378641271059
Q9Y4K1	AIM1; CRYBG1	-0.0627850091171642	3.42694589242425	-2.56618209346377	0.0461498078708272	0.656640918778751	-4.13549466019098
P19793	RXRA	-0.111177956768291	3.3306965441634	-2.19140069370339	0.0751709748750529	0.692419402141054	-4.13619534353498
Q8TDJ6-3	DMXL2	0.0877367020877278	3.24367781499759	2.31044580203602	0.0642785993714942	0.667644697400095	-4.13836606638358
P51784	USP11	0.0775863474257594	3.41037428094434	2.83309642679448	0.0329435217263346	0.652299696702783	-4.13843064287376
Q9H446	RWDD1	0.202392748792195	3.33959201679239	2.23043529581177	0.0714000087165962	0.689900336113005	-4.13878604764957
P02452	COL1A1	-0.147106394156573	3.37208876573403	-2.0334971566202	0.0926765943921851	0.71036960377837	-4.144836346508
Q5JSL3	DOCK11	-0.063578624980002	3.2537332183154	-2.6742605568553	0.040214906881282	0.653955463216203	-4.14692322956162
P46934-4	NEDD4	0.135373023674215	3.29334419139383	2.38941478216232	0.0579822890808852	0.667644697400095	-4.14955008095281
O43432-3	EIF4G3	0.0780183129053822	3.3561893625545	2.92731363531982	0.0293174917351174	0.652299696702783	-4.15126621321006
P52943	CRIP2	0.206822650314233	3.20220573847384	1.88657945070011	0.112741480557037	0.727089788587402	-4.1518989988141
Q99816	TSG101	0.0900084565975793	3.26636409269699	2.55349299644552	0.0469063268212628	0.656640918778751	-4.15372301394448
Q8NEZ5-1	FBXO22	0.0681815133138083	3.31584204898465	2.46385650763421	0.052645065260344	0.663179035285209	-4.15451342302665
P10909-2	CLU	-0.102301445552369	3.32359921499492	-2.29780455603315	0.0653519651354179	0.667644697400095	-4.15465088995757
O75191	XYLB	0.131024510553443	2.78551238006707	1.98794753511172	0.0984732138522152	0.716105600093805	-4.15476946124647
Q9UI14	RABAC1	-0.149546768307025	3.3263626121357	-1.96276192467101	0.10183667891474	0.718716301334403	-4.16019008404797
Q7LFL8-1	CXXC5	-0.112396568774859	3.42434990675384	-2.03895049663912	0.0920065296713866	0.708708931364335	-4.16528584990179
O60701	UGDH	0.0650110044280903	3.43141042168884	2.77590654115329	0.0353818928266227	0.653955463216203	-4.16640285565536
Q9NVM6	DNAJC17	0.116353849409859	3.3521718537562	2.174579745431	0.0768597367882704	0.695366842612303	-4.16789839278048
Q9NYB0	TERF2IP	0.117823932288862	3.14695663961983	2.52225503859958	0.0488261387730695	0.656640918778751	-4.16853780662249
Q9BT23	LIMD2	0.221856956182727	3.43221769934248	2.31596381388226	0.0638159228357334	0.667644697400095	-4.17300095614182
Q99640	PKMYT1	-0.194584345944789	3.35365825708526	-1.97787654755227	0.0998043100490686	0.716105600093805	-4.17329528938778
Q01484	ANK2	-0.0608059335581003	3.37120724390221	-2.79681657880991	0.0344682558759646	0.652299696702783	-4.17481073100448
Q06546	GABPA	0.0695115847399149	3.30129446502569	2.46389423157398	0.0526424975096105	0.663179035285209	-4.17609714817428
Q9UEU0	VTI1B	-0.129052571387433	3.34853902847366	-2.14483274066071	0.079943924427525	0.695366842612303	-4.17685412481177
O75674-2	TOM1L1	0.120555742255962	3.35406816860829	2.26205671493224	0.0684909524593967	0.676483378152322	-4.17705388183683
P50135	HNMT	0.110435418547603	3.44204288600314	2.12161317454301	0.0824408328998393	0.695804257434067	-4.17801511799663
Q96E22	NUS1	-0.170638272553664	3.33215212441477	-2.14521682413261	0.0799032904470877	0.695366842612303	-4.17815638607021
Q9H2P0	ADNP	-0.0472711674762869	3.29893834189562	-3.04012864241217	0.0255408887764069	0.652299696702783	-4.17823843324816
Q12778	FOXO1	0.0867323561928517	3.44610852701029	2.37570581752071	0.0590265446783917	0.667644697400095	-4.17940548508577
Q9Y259-1	CHKB	-0.259398370737655	3.29526538109771	-1.92955485530386	0.1064515561783	0.722811621274888	-4.18166302144648
P23610	F8A2; F8A1; F8A3	0.109783276585134	3.32913296452655	2.16031418821975	0.0783230049346048	0.695366842612303	-4.18836474280449
O43292-1	GPAA1	-0.18292616078096	3.27556019972136	-1.98000341360689	0.0995216726803577	0.716105600093805	-4.191355978541
Q8TCG1	KIAA1524; CIP2A	0.0857283036800172	3.3154764017934	2.65097624340063	0.0414200460683479	0.656480625605375	-4.19475164962164
Q3KP66-1	C1orf106	-0.112676479733041	3.368088513243	-2.18767561061633	0.0755415849311865	0.692419402141054	-4.19632859764118
P30533	LRPAP1	-0.0894702063940564	3.37418682849745	-2.57331961721354	0.0457300517976034	0.656640918778751	-4.19707485817269
Q9GZT9-1	EGLN1	0.0689453280773135	2.8008443725256	2.35277139327091	0.0608184563830333	0.667644697400095	-4.2046588858934
Q9UN79	SOX13	-0.0765398127070228	3.42598706308314	-2.24837726626431	0.0697338120474352	0.682529210399346	-4.20472268915339
P45974-1	USP5	0.0982754480932034	3.29393874440165	2.68073848623873	0.0398864173706422	0.653955463216203	-4.20485817593307
A6NKF1	SAC3D1	0.233086473965871	3.27615770107276	2.05712941972876	0.0898087013062164	0.701866875138691	-4.20525497486954
Q08426	EHHADH	-0.14706036918777	2.93244909862317	-2.14307642558147	0.0801300076620044	0.695366842612303	-4.20754531450871
Q9HBR0	SLC38A10	-0.118431518329705	3.29153227145464	-2.23767882541756	0.0707223516217913	0.687682993209611	-4.20807613330298
P21399	ACO1	0.0600899305866589	3.32614107185555	2.71920839688088	0.0379946281097008	0.653955463216203	-4.20844382024216
Q9H0X4	ITFG3; FAM234A	-0.188980503971651	3.34430251519468	-2.24804618287592	0.0697641854274495	0.682529210399346	-4.20858691411229
O60547-1	GMDS	0.11623059991478	3.37577154471831	2.53123550834078	0.0482657179297331	0.656640918778751	-4.20988515021521
P48449-1	LSS	-0.107067259061395	3.33513727867327	-2.64665196449925	0.041648134656366	0.656480625605375	-4.21078666849759
Q9H3K6-1	BOLA2B; BOLA2; LOC107984053	0.0888498796693304	3.24778530259712	2.20570487892101	0.0737654378735578	0.690707585170939	-4.22136208159757
O75155-1	CAND2	0.0794470413212366	3.26450725928938	2.29838381735514	0.0653023684734092	0.667644697400095	-4.22481729960432
Q9UNZ2-5	NSFL1C	0.14181966397447	3.34809139650015	2.60030796923327	0.0441796725738512	0.656640918778751	-4.22772956573667
Q6NXE6-1	ARMC6	0.0826193783156428	3.38505165606622	2.2779138605423	0.0670793689480117	0.670319082008035	-4.22873600021596
P43246-1	MSH2	0.0980388252329375	3.43973285825501	2.93656635188062	0.0289856976430765	0.652299696702783	-4.23021052710438
O95279	KCNK5	-0.152266690377333	3.38063259673595	-1.90122548957543	0.110556588100744	0.725032462556748	-4.23060141491535
Q6ZMI0-1	PPP1R21	0.0721527847776443	3.32700156159194	2.52349494724651	0.0487483489910135	0.656640918778751	-4.2361005774284
Q14692	BMS1	-0.0817072688004678	3.32435117691433	-2.80924572761188	0.033937393016507	0.652299696702783	-4.23642167486091
P29317	EPHA2	-0.142782490230694	3.35069128841484	-2.28802197203039	0.0661955896343863	0.667644697400095	-4.23663430460588
P20339	RAB5A	0.117856819692731	3.37387115121923	2.26811247405507	0.0679482175140044	0.675257415501868	-4.23926947022343
Q9UBE0-1	SAE1	0.0867360519928398	3.3314670632593	2.69448484466947	0.0391989471182764	0.653955463216203	-4.23994116547473
Q14157-5	UBAP2L	0.0981984937581114	3.42721793073027	2.14104838382377	0.0803454420109136	0.695366842612303	-4.24156322189608
Q9Y330	ZBTB12	-0.094817297226824	3.35948563886474	-2.09637288134982	0.0852471907610099	0.697991490104712	-4.24226613285083
Q8IWX8	CHERP	-0.0537007260138422	3.31892543850589	-2.67555973279022	0.0401487926526355	0.653955463216203	-4.24300171692904
Q9Y5K3	PCYT1B	0.101891800373239	3.45866566119694	2.36738867926161	0.0596698138882663	0.667644697400095	-4.24592358662204
Q6PII3	CCDC174	0.112105564491669	3.28896649122247	2.00470262760849	0.0962988543791794	0.714774775611695	-4.24599121171245
Q9BSK2	SLC25A33	-0.309514528888352	3.28083054641308	-1.82457950001914	0.122484465109894	0.733441736359969	-4.24649990164646
Q96AY2-2	EME1	0.0786607651339059	3.12466502131609	2.21360335376931	0.0730011531295408	0.690707585170939	-4.24705678298364
Q96N96-6	SPATA13	-0.102109706486121	3.39363675188153	-2.01335345269295	0.0951955625206464	0.712000315531558	-4.24708129803873
P43251-2	BTD	0.112592783635445	3.19074030845542	2.04628861425448	0.0911127495768123	0.705368538636562	-4.2473551330914
Q15853	USF2	0.208561697220298	3.32377574786424	2.08354016624768	0.0867118250817899	0.697991490104712	-4.24830990692717
P09417	QDPR	-0.0777712150926363	3.28644361650358	-2.51026400486708	0.0495853478956596	0.656640918778751	-4.24857182292413
Q86W54-1	SPATA24	-0.268264921860879	3.25632210794068	-1.77722647246754	0.130491816848967	0.734995534891536	-4.2488282770964
O14562	UBFD1	0.0839736144302357	3.38172257879108	2.44778873283631	0.0537510177337034	0.663179035285209	-4.24902139074609
P32019-1	INPP5B	0.13415434803224	3.31674831745949	2.16725379826768	0.0776075856215419	0.695366842612303	-4.25230806860643
Q5JVS0	HABP4	0.222564615589428	3.2462420080337	2.08393649564516	0.0866662029580001	0.697991490104712	-4.25323569303848
P00390	GSR	0.0414146529500377	3.24898379535737	2.71572053864751	0.0381620655551938	0.653955463216203	-4.25475847747198
Q9HBK9	AS3MT	0.0838952854937629	3.36010868927087	2.56009016374072	0.0465113544738699	0.656640918778751	-4.25679544591587
Q86SQ0-1	PHLDB2	-0.0633687841761352	3.37660440142081	-2.66671651406112	0.0406011568849208	0.653955463216203	-4.258884704089
Q9BW27	NUP85	-0.0903433024808696	3.27787279467588	-2.62388023809716	0.0428718777985934	0.656640918778751	-4.26005665717689
O94888	UBXN7	0.0685917560898745	3.36799278101195	2.56578213583191	0.0461734517091203	0.656640918778751	-4.2610525509272
O95721	SNAP29	0.108114062908721	3.09459728445719	2.34979405866331	0.0610552815923641	0.667644697400095	-4.26287581535152
Q9NVH6-8	TMLHE	-0.299804586695188	3.19972125530502	-1.92507808701579	0.107089801653686	0.722811621274888	-4.26739387420729
Q1MSJ5-3	CSPP1	-0.0811223644395803	3.29587956253967	-2.29252161799698	0.0658061329631324	0.667644697400095	-4.26782734103111
Q8NFC6	BOD1L1	0.0570873376386033	3.33952535224826	2.97480007020231	0.0276577412759904	0.652299696702783	-4.26882569557039
Q9P289	MST4; STK26	0.143641501256808	3.44291447814543	2.35122710587046	0.0609411713070816	0.667644697400095	-4.2698210071395
Q9UBL3-1	ASH2L	-0.0538499009845524	3.2906765662052	-2.68749660210257	0.0395468170642425	0.653955463216203	-4.26995048553215
Q9HD26-1	GOPC	0.0800071714965836	3.18490609954684	2.4425679476843	0.0541156891418497	0.663179035285209	-4.27169398359114
Q05655	PRKCD	-0.0710627182417429	3.31167261848196	-2.48979843806053	0.0509105207760371	0.663179035285209	-4.27244361749893
Q8N4A0	GALNT4; POC1B-GALNT4	-0.182810223650744	3.29049115612602	-1.77690266731208	0.130548335044135	0.734995534891536	-4.27440674583579
P25490	YY1	0.13457009623348	3.29270965646499	2.14305544254736	0.0801322335597677	0.695366842612303	-4.27523611694393
Q99767-2	APBA2	0.101599524261458	3.31955172056407	2.08673909914148	0.0863442992903845	0.697991490104712	-4.27839440006039
Q9P0V9-2	SEPT10	0.0640221742752082	3.39179086172344	2.46710008800074	0.0524247734496711	0.663179035285209	-4.27890955364081
P15121	AKR1B1	0.0824134352763877	3.23225585680757	2.75788390568566	0.0361905595423303	0.653955463216203	-4.28217630485044
P25440-2	BRD2	0.0513086422588482	3.27047298276642	2.55546087791446	0.0467881334525593	0.656640918778751	-4.28260789995916
Q8IWY9	CDAN1	0.197888997803982	3.30942010485213	1.74791128486011	0.13570863845985	0.734995534891536	-4.28295852767532
Q9UNY4-1	TTF2	-0.0411650385132582	3.37952535288116	-2.73922296229477	0.0370491141368329	0.653955463216203	-4.28429419392738
Q9UPS8-3	ANKRD26	-0.106996162820937	3.23963351718494	-1.98529037870697	0.0988226379817335	0.716105600093805	-4.29020397305013
Q6PI98-1	INO80C	0.138811575988167	3.31951362887632	2.05212106597321	0.0904087490382548	0.705368538636562	-4.29047792598473
P08572	COL4A2	-0.256679420700836	3.24503163190424	-1.82342089089361	0.122674384805008	0.733441736359969	-4.29167982701662
Q96DR4	STARD4	0.180644046314829	3.37845864294473	2.0692645111994	0.0883718013087298	0.697991490104712	-4.29599501624631
P19438-1	TNFRSF1A	-0.161687311927786	3.31453467864052	-1.92039641109551	0.10776142491796	0.723312031470335	-4.29662349089702
Q9Y5P6-2	GMPPB	0.0748334558172109	3.30853421170538	2.30531506964183	0.0647119855373377	0.667644697400095	-4.29885554933103
Q8N0U4-1	FAM185A	0.143756769439481	3.31685173041647	1.77912963539488	0.130160124258427	0.734995534891536	-4.30040888401716
P05771-2	PRKCB	0.117778632190244	3.40391404202665	1.93480814757459	0.105707537594841	0.722811621274888	-4.3030907397296
Q49A88-1	CCDC14	-0.0704142485002405	3.33608044033493	-2.37792889694364	0.0588558565786206	0.667644697400095	-4.30344511812253
O00291	HIP1	-0.0675523407165346	3.35696402226315	-2.70861469482625	0.0385056717844814	0.653955463216203	-4.30609810618899
P63098	PPP3R1	0.134938227560244	3.35684712572338	2.18798999206404	0.0755102332613048	0.692419402141054	-4.3064220601743
Q9UHL4	DPP7	0.0892561613809026	2.73758478243934	2.2215130962722	0.0722440945158107	0.690707585170939	-4.30847631734401
Q14839-2	CHD4	-0.0610485245071688	3.34001959325553	-3.19484328850126	0.0212062648712483	0.652299696702783	-4.30881727451584
P61158	ACTR3	0.0767247443382402	3.28408607742113	2.59298394326501	0.0445947282205662	0.656640918778751	-4.31220258080142
Q9Y3I1	FBXO7	0.106150041091448	3.32266006806727	1.93341431540954	0.105904427149086	0.722811621274888	-4.31386830185133
Q9UI36-1	DACH1	0.2473840251073	2.07063990983897	1.76882162727033	0.131966759804999	0.734995534891536	-4.31551775394042
Q92585	MAML1	0.081595465894449	3.36653239821376	2.10126835475512	0.0846952350004841	0.697991490104712	-4.31664165491205
Q9BUA3	C11orf84	0.070831132956306	3.33083472277697	2.31040507549383	0.0642820273831051	0.667644697400095	-4.31806903953417
Q99550	MPHOSPH9	-0.279696755929279	3.18711680834516	-1.66915344721639	0.150768942769149	0.749139109615353	-4.32046378681765
P52746	ZNF142	-0.268670721192368	3.26336586111806	-1.66369537412256	0.151871565740705	0.749139109615353	-4.32259777582432
Q765P7	MTSS1L	-0.215912758711456	3.2781517226551	-1.66686015964209	0.151231266885223	0.749139109615353	-4.32262735339109
O15264	MAPK13	-0.171054254298692	3.15358012328141	-1.96444607895025	0.101608141751073	0.718716301334403	-4.32275727885194
Q4AC94-5	C2CD3	-0.115026369611367	3.29847801466763	-2.19597698096304	0.0747182809813652	0.692419402141054	-4.3234585612431
Q8TDM6-1	DLG5	-0.0624655011083988	3.36795218216499	-2.52367683795151	0.0487369486700347	0.656640918778751	-4.32358720036717
Q9Y2Y9	KLF13	0.461748327782965	3.13595223006884	1.84852943752014	0.118624087918529	0.733441736359969	-4.32469685653098
P49756-1	RBM25	-0.0387191109197084	3.33171009943998	-2.78945465459512	0.0347869583344709	0.653955463216203	-4.32532384684693
Q53GL0-1	PLEKHO1	-0.0826375169522742	3.32445360456145	-2.19486447233007	0.0748280690083926	0.692419402141054	-4.32562455173968
Q9H7H0-3	METTL17	-0.157311748841891	3.34181444684001	-2.04122129207726	0.0917289858569414	0.70766359353862	-4.32817429385031
Q9Y624	F11R	-0.155471457782198	3.36523795447482	-2.30393132737518	0.0648293963845767	0.667644697400095	-4.32906283452042
Q6PJG2	ELMSAN1	-0.0558666257843892	3.19745082504252	-2.38311033945479	0.0584600582035635	0.667644697400095	-4.32915725749853
Q96JQ0	DCHS1	-0.167167177024611	3.26904323833944	-1.71516776354683	0.14178057159581	0.744036505653461	-4.32992839847718
Q5T440	IBA57	0.0956339953514628	3.32001930571522	2.18177223302174	0.0761328337729188	0.69321830770014	-4.33232476140577
P16383-1	GCFC2	0.096306857800854	3.13804441642863	2.22804708544785	0.0716249260399488	0.690707585170939	-4.33300730108216
Q13620	CUL4B	0.0937508176490836	3.24584438950161	2.61745124987599	0.0432243626931356	0.656640918778751	-4.33458762773128
Q7L4I2-1	RSRC2	0.104275634341115	3.34730767047235	2.1289648019234	0.0816416160789982	0.695775512805027	-4.3348962673135
Q9Y3B1	SLMO2; PRELID3B	-0.116531469909754	3.2870910133587	-1.98002673172947	0.0995185785008254	0.716105600093805	-4.33704149032775
P42336	PIK3CA	0.181550355658143	3.16119177416911	1.65578059102768	0.1534845244876	0.749139109615353	-4.33792436277231
Q8TB03	CXorf38	0.0794736779562371	3.22561429064228	2.16702879000299	0.0776306748835016	0.695366842612303	-4.33826968771221
Q9BZJ0	CRNKL1	-0.0648630423186518	3.31505299513656	-2.51932760455075	0.0490103302834745	0.656640918778751	-4.34155240069486
Q8WU79-1	SMAP2	0.0864879062005163	2.63387931475086	2.13849836285886	0.0806171814302664	0.695366842612303	-4.34381448443502
Q9BQA1	WDR77	0.0587801710094623	3.31809278159895	2.3148283874766	0.0639108379580161	0.667644697400095	-4.34443565927933
Q8WVM7	STAG1	-0.0675914930340481	3.24568585054709	-2.44015323295935	0.0542852494993628	0.663179035285209	-4.34458267033754
P30291-1	WEE1	0.0726469767367348	3.40179465526212	2.16202520823657	0.0781459752776081	0.695366842612303	-4.34464034439008
Q7L8W6	ATPBD4; DPH6	0.122804917272459	3.34045215353158	2.10459901976528	0.0843218287031932	0.697991490104712	-4.34582180122481
Q7KZF4	SND1	0.0830070994280998	3.33231251104285	2.94727255752042	0.0286069181595734	0.652299696702783	-4.34597182931759
Q07954	LRP1	-0.0648928118489851	3.39711653826678	-2.97869713641359	0.0275261869950843	0.652299696702783	-4.3463417577551
Q3SY69-1	ALDH1L2	-0.19044743349538	2.9291390418087	-2.03728432711876	0.0922107245966426	0.709569387267244	-4.34758414628309
P09619	PDGFRB	-0.148474115031809	3.36359038521008	-1.92474550257537	0.107137372739945	0.722811621274888	-4.34895723846466
P06132	UROD	0.110667625355506	3.32036304429949	2.10439580497634	0.0843445624396871	0.697991490104712	-4.34950489196459
O60291-2	MGRN1	-0.27927243210804	3.34832727426051	-2.21644696987938	0.0727280309528252	0.690707585170939	-4.35089360002434
Q03426	MVK	0.0630400935080961	3.39285222459492	2.32284101708529	0.0632442056941816	0.667644697400095	-4.35096815217524
Q6P1A2	LPCAT3	-0.158076455102598	3.36612703539339	-1.92419751395924	0.107215800965957	0.722811621274888	-4.35167445938276
Q8NI08	NCOA7	0.15878756051402	3.08348205681687	1.82224342989795	0.122867697530184	0.733441736359969	-4.35178323298114
O60493-1	SNX3	0.168311039623986	3.23685834701077	2.14882901465064	0.0795221912642647	0.695366842612303	-4.35479619337069
Q9NVX2	NLE1	-0.0684166526805067	3.33355536765007	-2.35285448649003	0.0608118609163332	0.667644697400095	-4.35514705028263
Q9H9E3-1	COG4	0.0847906978762941	3.26203069514149	2.283354077089	0.0666021800756413	0.667644697400095	-4.3561089831566
P83436	COG7	0.0715905983075403	3.27073171730119	2.41197413693597	0.0563064227922653	0.667644697400095	-4.36354307015474
Q969I6	SLC38A4	-0.178885377607777	3.35678186161259	-1.65392070132482	0.153865977535946	0.749139109615353	-4.36405321930186
Q6ZU67-1	BEND4	-0.146305533086403	3.34805267332974	-1.70852427044948	0.143044933103025	0.746827522835184	-4.36418372624358
P49591	SARS	0.0648546867439497	3.27341231391359	2.57916205501732	0.0453895196895088	0.656640918778751	-4.36599734181305
P49407-1	ARRB1	-0.10968698894028	3.24946249331206	-1.99991384748267	0.0969152341194156	0.714774775611695	-4.36619130392215
Q16514	TAF12	0.102278514820304	3.27117777171616	1.9872171671933	0.0985691330953527	0.716105600093805	-4.36722934712929
P09455-1	RBP1	0.105101715847361	3.35688531382111	2.23772422705794	0.0707181255134547	0.687682993209611	-4.36743504748148
P22102-1	GART	0.0503420822074494	3.35013202406117	2.96371914406423	0.0280355956890819	0.652299696702783	-4.36901504952001
O94966-6	USP19	0.0555225742813059	3.31963837686872	2.46734316160139	0.0524083045588696	0.663179035285209	-4.3698623816787
Q1ZZU3	SWI5	0.157203364351014	3.28915448420711	1.71591828922735	0.141638430232305	0.744036505653461	-4.36993008765267
O94955	RHOBTB3	-0.214168188277289	3.19024592734435	-1.59603237941757	0.166211474276538	0.751123342519793	-4.37030419129061
Q9UPY8	MAPRE3	0.164330296295471	3.00303033151967	1.69534843403788	0.145585488002344	0.749139109615353	-4.37230832821314
P04637	TP53	0.211681868755546	1.67797899532156	2.17947282524737	0.076364436994648	0.693334864642532	-4.37430968640891
P30050-1	RPL12	-0.070465501888952	3.3261407164378	-2.76971463126559	0.0356574798325817	0.653955463216203	-4.37741043929793
Q9BU89	DOHH	0.0943083606572718	3.2696592274274	2.18340654647915	0.0759686673774008	0.69321830770014	-4.37791370187975
Q8N1B4	VPS52	0.0957500295960436	3.24640984999012	2.34541458825619	0.0614054152478945	0.667644697400095	-4.37796871132062
Q969G3	SMARCE1	-0.0890894190153203	3.34906194880166	-2.6080494715411	0.0437454847978654	0.656640918778751	-4.37864585025017
Q96PM9	ZNF385A	-0.153794048397856	3.22329020509938	-1.82119706457812	0.123039743808182	0.733441736359969	-4.37913927402447
Q92930	RAB8B	-0.167406847486507	3.26798904337348	-1.92671485521952	0.106856000023192	0.722811621274888	-4.38033856602461
Q8IWA5-2	SLC44A2	-0.110820852043186	3.36291298706905	-1.89134756137551	0.112025413935524	0.726290966137758	-4.3803853228897
P98082	DAB2	-0.105877247893971	3.3382692802717	-1.99735666917699	0.0972460338817546	0.714774775611695	-4.38173684611965
P18085	ARF4	0.105033472008045	3.32886444756873	2.34820539452639	0.0611820481787444	0.667644697400095	-4.38209801304147
P18074-1	ERCC2	-0.0761835339875426	3.3367862250879	-2.44891890196682	0.05367242163186	0.663179035285209	-4.38265160777033
P60228	EIF3E	0.0400524863932154	3.35259461123317	2.70709853561467	0.0385794202639114	0.653955463216203	-4.3830009535042
Q68DK7	MSL1	-0.145615395044986	3.29648337210875	-2.13189421808581	0.0813253998906231	0.695775512805027	-4.38332436226038
Q92692-2	PVRL2; NECTIN2	-0.17324331997462	3.33832535190832	-1.83807768651852	0.120293478943824	0.733441736359969	-4.38422340514098
Q53HV7-1	SMUG1	-0.231134557628245	3.20006561299816	-1.85868122489536	0.117024946584004	0.733263163684083	-4.38492339292258
P27695	APEX1	0.220842111797708	3.42843734478963	2.66139145582665	0.0408762146706779	0.653955463216203	-4.38556412410608
Q13057-2	COASY	0.0943325217241564	3.20673388414618	2.06799000104755	0.0885215912250159	0.697991490104712	-4.38577583607581
Q92922	SMARCC1	-0.0738173938644909	3.35460417750658	-2.93132002322925	0.0291733172920572	0.652299696702783	-4.38667864005433
Q7Z4Q2	HEATR3	-0.116972292835536	3.16967128981216	-2.25439183644553	0.069184454064701	0.680491194338957	-4.38676159513048
P12532	CKMT1B; CKMT1A	-0.0632554483670567	3.28451212549822	-2.44267133455991	0.054108441989988	0.663179035285209	-4.38730474499037
Q8N4T4-2	ARHGEF39	0.169428899344608	3.35973369701921	1.62155921477081	0.160653159885108	0.751123342519793	-4.39301190029787
Q99941-1	ATF6B	-0.13370855556729	3.30440207710973	-1.76450937515123	0.132729938198829	0.734995534891536	-4.39559066300502
Q9Y5J6	FXC1; TIMM10B	0.11333249618803	3.26153774440822	1.9633544872307	0.101756209245915	0.718716301334403	-4.39610106513275
Q9UJY4	GGA2	0.134892631448313	3.32423862606712	2.07306138032112	0.0879271165055844	0.697991490104712	-4.39725955613601
P56945-3	BCAR1	-0.0707390166314473	3.39981335776792	-2.37522146295736	0.0590638031752484	0.667644697400095	-4.39732272523609
Q12926	ELAVL2	0.0998380536852236	2.93038885630448	1.9171212328432	0.108233819344018	0.724373469675889	-4.39735022259294
Q8WUM9	SLC20A1	-0.211375956460206	3.30869339940732	-1.84820991102167	0.118674776595209	0.733441736359969	-4.39867168813529
Q8N5F7	NKAP	0.140851933175224	3.17509211047008	2.19650859736436	0.0746658779164121	0.692419402141054	-4.39948531767889
O75362	ZNF217	0.0940846066341193	3.36009395162937	2.47012674147516	0.0522201035791593	0.663179035285209	-4.40004887699244
Q9BU76-1	C1orf35	0.209370067630567	3.19878287720043	1.99769295699842	0.0972024651979748	0.714774775611695	-4.4022600099986
P0CK96	SLC35E2B	-0.217824405077846	3.33196518859766	-1.58183666052489	0.169382602708022	0.753114235459805	-4.40233512763275
Q9NWB6	ARGLU1	-0.0983874801088322	3.33866608887972	-2.06999723625547	0.0882858046735906	0.697991490104712	-4.40238319187376
Q8NFU7	TET1	-0.0758404632834472	3.36233011786929	-2.44142352768877	0.054195979283402	0.663179035285209	-4.40531096242379
Q8TCX5	RHPN1	-0.198413988323954	3.32974241882652	-1.64876433344781	0.154928372205332	0.749139109615353	-4.40617008976684
P49427	CDC34	0.197834643925112	3.38963698691941	2.13902951261052	0.0805605013948366	0.695366842612303	-4.40738922914543
P51153	RAB13	-0.152481110455987	3.39171161494856	-2.12466439861132	0.0821081423815423	0.695775512805027	-4.41000003253248
P07942	LAMB1	-0.102696600572301	3.34024078982358	-2.52633926630612	0.0485704034847419	0.656640918778751	-4.41147968458708
Q9BYT3-1	STK33	0.110515682888285	3.38310703972937	2.22587542099499	0.0718300952220528	0.690707585170939	-4.41150468598224
Q5BKZ1	ZNF326	-0.0646173400146625	3.29674768755026	-2.39882167134768	0.0572771141045046	0.667644697400095	-4.41171955989994
O15488-1	GYG2	-0.174074480142215	3.40459743202058	-1.81866207118483	0.123457557205996	0.733441736359969	-4.41214861096928
Q8IWF2	FOXRED2	-0.115636156174556	3.22908021559499	-1.91608932321161	0.108383092109639	0.724373469675889	-4.41330120740152
Q86XS8	RNF130	-0.129363339538597	3.3691861046516	-1.72267250998097	0.140365573275923	0.741959303484021	-4.41411477651206
P15822-1	HIVEP1	0.130027883723014	3.28805234418331	1.6821381111857	0.148177275789265	0.749139109615353	-4.41445815991267
Q96CT7	CCDC124	-0.108312275223783	3.28877759732145	-2.13625694404417	0.0808568253201412	0.695366842612303	-4.41852741778428
Q9UJT0	TUBE1	0.132384450159176	3.25189444289592	1.6349232351135	0.157815666406465	0.749139109615353	-4.41997249364097
Q8N0T1	C8orf59	0.191815143480946	3.40372575827949	2.14047302285471	0.0804066711072287	0.695366842612303	-4.42021886095996
Q6NSI4-1	CXorf57	0.0867190723113916	2.93445990111322	1.98100823821484	0.0993884275766053	0.716105600093805	-4.42064401655638
Q9HCN4-5	GPN1	0.0732364878665619	3.35351140338914	2.2252101730002	0.0718930682514038	0.690707585170939	-4.42212460956093
P52747	ZNF143	0.10394775456325	3.3415106720769	2.31093308081852	0.064237599401549	0.667644697400095	-4.4229979722969
Q6ZWJ1-1	STXBP4	-0.0815746988743484	3.31619929893562	-2.3711743307253	0.0593761032113814	0.667644697400095	-4.42426744922035
Q5T2R2-1	PDSS1	-0.154190730261928	3.30833707422975	-1.87549961630586	0.114423370780008	0.728511286825078	-4.4254626994431
Q8NFD5-3	ARID1B	-0.0392092392480401	3.33226336746847	-2.71460963405547	0.0382155635576925	0.653955463216203	-4.42653013954986
P54259	ATN1	0.110915187042738	3.39385302183391	1.80354462910003	0.125978886836392	0.733441736359969	-4.4274246433345
P07858	CTSB	0.107628627282381	3.08241899356213	2.13485590487507	0.0810069955814445	0.695366842612303	-4.42826765776135
Q12888-2	TP53BP1	-0.0326186246637061	3.35994730496097	-3.08229554146551	0.024269694128051	0.652299696702783	-4.42979630038598
Q9NQ11	ATP13A2	-0.167995739334675	3.34337411230874	-1.73112137226158	0.138789269637312	0.740016586066525	-4.43023595050595
P25786-2	PSMA1	0.115248426212147	3.31164960938234	2.80061899589862	0.0343048949491617	0.652299696702783	-4.43199784625615
Q7Z4G1-1	COMMD6	0.102072703880374	3.20958043630851	1.80615062896311	0.125540600418899	0.733441736359969	-4.43672016685168
O95801	TTC4	0.122923560049179	3.25894604292455	2.34526898275492	0.0614170927438123	0.667644697400095	-4.43806793665427
Q08174-2	PCDH1	-0.120683123237343	3.44753902439067	-2.49785389454488	0.0503844434547521	0.661899743467222	-4.43838180233622
Q96EK6	GNPNAT1	0.0952132170160447	3.3976763639316	2.10680583991176	0.0840753597663942	0.697991490104712	-4.43848389846742
A1L170-2	C1orf226	-0.0919750151205818	3.38957968395991	-1.97007528932592	0.100848063859288	0.716727491466766	-4.43955075799434
Q07817-1	BCL2L1	-0.125327859221133	3.2337506573103	-1.92149838023394	0.107602954341125	0.723312031470335	-4.44036743646671
P49754	VPS41	0.0576738445174954	3.32689387350977	2.35589911498224	0.0605707181045919	0.667644697400095	-4.44096446469481
Q13129	RLF	-0.0642591407317248	3.31055421903231	-2.44707412093258	0.0538007779004523	0.663179035285209	-4.44234424351087
Q8TBC4-1	UBA3	0.056469150792335	3.3215698604023	2.30290099959915	0.0649169661174064	0.667644697400095	-4.44693623943347
Q13813-3	SPTAN1	-0.150926229188685	3.29185440906818	-1.79756656475017	0.12699009307383	0.733441736359969	-4.44717455940501
Q9NQS1	AVEN	-0.132304636432874	3.37133664474427	-2.15396495826675	0.078983589436224	0.695366842612303	-4.44782837764302
Q4G0S7	CCDC152	0.112596037793843	3.38748829619946	1.8641317487701	0.116175349292925	0.732223559156751	-4.44894918431728
Q9UK32	RPS6KA6	0.0827249327214477	3.42148450731753	1.9642380239144	0.101636346103714	0.718716301334403	-4.4514742212564
P40123	CAP2	0.0603185005890129	3.3365104010556	2.28919758886707	0.0660936025966618	0.667644697400095	-4.45302203712659
Q9BWD1	ACAT2	0.194247485529254	3.43281612343471	2.54141684966205	0.0476387028728776	0.656640918778751	-4.45454697932154
P61927	RPL37	0.579370265313755	3.41113079217297	2.14509845944328	0.0799158105048244	0.695366842612303	-4.45467071218056
O75688-2	PPM1B	0.102977981801357	3.42024941029835	2.41036366133044	0.0564243336304611	0.667644697400095	-4.45550699544696
Q96M89-1	CCDC138	-0.0778815542519513	3.33679601846866	-2.10323818039758	0.0844741878256882	0.697991490104712	-4.45608300312181
Q9UL15-2	BAG5	0.0733810756731176	3.37988228585074	2.28598572461793	0.0663726311509658	0.667644697400095	-4.45778797897051
Q4VC31	CCDC58	-0.0941711522305644	3.29371959298528	-2.20854437748363	0.0734897167766692	0.690707585170939	-4.45790353664347
Q9BYJ9-1	YTHDF1	-0.0658890107348235	3.36717907933582	-2.20415454846633	0.0739164353770867	0.690707585170939	-4.45812703242156
Q9H425	C1orf198	0.0887974137818417	3.40442805578872	2.14127260597635	0.0803215937590187	0.695366842612303	-4.45817090899515
Q5VUB5	FAM171A1	-0.136956976034522	3.31812540099227	-1.58933847436655	0.167699586322935	0.752161125742972	-4.45907436805713
Q12882-1	DPYD	0.114598930280371	3.02926342207533	1.80314518725921	0.12604620164221	0.733441736359969	-4.4598057168582
Q8WUF8	FAM172A	0.096841959934383	3.30150757801764	2.2041934899444	0.0739126386326008	0.690707585170939	-4.46007692390827
Q9Y5W7	SNX14	-0.134015650468219	3.31672815796603	-1.77273201503202	0.131278481619757	0.734995534891536	-4.46103142295305
O60488-1	ACSL4	-0.0509208372882551	3.40103977729841	-2.69458514837901	0.0391939782917957	0.653955463216203	-4.46250695178451
P05198	EIF2S1	0.0883381373128323	3.33476413842668	2.6401604624995	0.0419930903004306	0.656640918778751	-4.46296105433857
P61244	MAX	0.128545550445732	3.32303508435891	1.95552167235981	0.102825167111468	0.721707319974619	-4.46372208770278
Q9Y2V2	CARHSP1	0.103237587083966	3.43333644877038	2.04406625480302	0.0913824831094889	0.706521479736569	-4.46603599946846
P98172	EFNB1	-0.142450188478053	3.27753971269231	-2.0192231119642	0.0944543736517558	0.711142251870726	-4.46607021135534
O15511-1	ARPC5	0.0837271043180128	3.23976634167943	2.36246279424751	0.0600543016027161	0.667644697400095	-4.46880334125264
O75071	EFCAB14; KIAA0494	-0.270841187226337	3.27093949438845	-1.43493904901548	0.205783233078479	0.776986386711222	-4.46979572231775
Q2M296-3	MTHFSD	-0.204427841893581	3.22274210867758	-1.55104990507715	0.17646157989536	0.759715623432772	-4.47253478953774
Q8NI36	WDR36	-0.0459640054634571	3.31901857626165	-2.56538898347577	0.046196705957752	0.656640918778751	-4.47507545937104
Q5TDH0-3	DDI2	0.0630945446661125	3.33888027416148	2.33102729528447	0.0625707202022569	0.667644697400095	-4.47579072604904
O43464	HTRA2	-0.118029086621482	3.09646407580208	-1.95213258165694	0.103291229623592	0.722811621274888	-4.47635716402496
Q13541	EIF4EBP1	0.100335866098438	3.27905076588426	1.93028171831639	0.106348294357259	0.722811621274888	-4.4771067950417
O43665-3	RGS10	0.117834543210927	2.69921511743918	1.74133181869689	0.136907683248205	0.736500105001307	-4.47807290323419
Q7L0J3	SV2A	-0.0927242209030254	3.36675323881251	-1.97408658482025	0.100309992979339	0.716206692535801	-4.47917715545149
Q04760-1	GLO1	0.0954979179281814	3.2146925099109	2.29970406353745	0.0651894767903275	0.667644697400095	-4.47922847680395
Q8N6N7	ACBD7	0.180994044177843	3.38535595220069	1.70910089690355	0.142934752410017	0.746827522835184	-4.47967986289131
Q969Q6-1	PPP2R3C	0.212067706498638	3.32823632215532	1.48226479508074	0.193314657989642	0.76773129536073	-4.48014036765514
Q9HAJ7	SAP30L	-0.113648723430713	3.28957739363641	-1.8473124155085	0.118817269166369	0.733441736359969	-4.48063214656041
P04632	CAPNS1	0.0676860172957574	3.26757994836297	2.12499956011251	0.0820716831971812	0.695775512805027	-4.48074858525102
Q4G0F5	VPS26B	0.0756614468932278	3.26534624995934	2.06566447937725	0.0887955805972627	0.697991490104712	-4.48085311502569
Q96A49	SYAP1	0.142954909836753	3.35983102593983	2.54471560824976	0.047437431925359	0.656640918778751	-4.48094087191028
Q9BUP0	EFHD1	-0.103208179707262	3.09121431715678	-1.71584497041408	0.141652309808875	0.744036505653461	-4.48158812414806
O75312	ZNF259; ZPR1	0.0860520636786659	3.35520059678339	2.26410921239036	0.0683064919093134	0.676483378152322	-4.48237792836471
Q9NZN4	EHD2	-0.120153489007265	3.34692162637883	-1.74585409429702	0.136082417801494	0.734995534891536	-4.48331038405869
Q96IW2	SHD	-0.276418735759526	2.76649796772396	-1.68099863416822	0.148402947616643	0.749139109615353	-4.48515378518114
Q96K17-1	BTF3L4	0.0961013761683157	3.36680321055249	2.32683872227115	0.0629143606995674	0.667644697400095	-4.48591213040606
P19623	SRM	0.106669344068846	3.30747314249144	2.28674885630641	0.0663062222089748	0.667644697400095	-4.48685434245725
Q499Z4	ZNF672	-0.240465753397992	3.32851492416497	-1.42691856327043	0.207969704318006	0.776986386711222	-4.48724877363942
P55327-3	TPD52	0.103877135097262	3.03318039080514	2.07222958323816	0.088024337235237	0.697991490104712	-4.49005001436224
Q8N2W9	PIAS4	0.075586274315981	3.37841452271018	1.99386312451747	0.0976998363269053	0.714774775611695	-4.49235434243297
Q8WVL7	ANKRD49	0.114380802041878	3.2796592731021	1.79321473090891	0.127731319699459	0.733441736359969	-4.49287655818987
P00558	PGK1	0.0659270410547049	3.131400746489	3.0455836452289	0.0253723749290263	0.652299696702783	-4.49315553458039
Q9Y2Q3-1	GSTK1	0.058664184627141	2.84507251339999	2.16277875452967	0.0780681425494857	0.695366842612303	-4.49316474392534
P31483	TIA1	0.0700620879399635	3.36404515749584	2.08698523516828	0.0863160876223333	0.697991490104712	-4.49372385617055
P55210-3	CASP7	0.343720017654423	2.61684678685866	1.73003618623489	0.138990748002114	0.740016586066525	-4.49449328475194
Q15691	MAPRE1	0.107653948791324	3.31897714779298	2.42908774651354	0.0550695496157156	0.667644697400095	-4.49667879768269
Q8N474	SFRP1	-0.0663837657485694	3.43458797367681	-2.23669207287839	0.0708142668215478	0.687705132980905	-4.49713361747384
Q9Y5X3	SNX5	0.0524394548983306	3.32814158362413	2.47837860580927	0.0516664224970989	0.663179035285209	-4.49783024843022
Q9Y5A6	ZSCAN21	0.0998259952111711	3.36288360845325	1.71562701116372	0.141693578395024	0.744036505653461	-4.49850766394747
Q14119	VEZF1	-0.107528097534529	3.26365093986052	-1.65709525173997	0.153215452910307	0.749139109615353	-4.49888619335241
Q8TDR0-1	TRAF3IP1	-0.0777967415746668	3.31313243383883	-1.91811735310496	0.10808992192063	0.724373469675889	-4.50024678787964
O14497	ARID1A	-0.0470719693906294	3.33864084399606	-2.90447074379873	0.0301545996105342	0.652299696702783	-4.5004994877185
Q14469	HES1	-0.12765162469187	3.28952179141946	-1.6808256217097	0.148437241997532	0.749139109615353	-4.50123418887469
Q9NZN3	EHD3	0.134021005123167	3.32964073871655	1.83890123344108	0.12016108541509	0.733441736359969	-4.50297393410854
Q53GS7-1	GLE1	-0.0604002817730324	3.28084732915189	-2.32781446450345	0.0628341303630293	0.667644697400095	-4.50586368851699
Q8N1B3-1	FAM58A; CCNQ	0.147251840778434	3.3283928245773	1.46907250490891	0.196716880760903	0.768988450927102	-4.50645411375452
P41091	EIF2S3	0.0484538020519934	3.36138638790647	2.60597026480798	0.0438616444978578	0.656640918778751	-4.50670425018648
Q49B96	COX19	-0.116609072581555	3.1710818163351	-1.94803450314842	0.103857671600343	0.722811621274888	-4.50743309776644
P62304	SNRPE	0.219150800157325	3.33105001556032	2.21570250817399	0.0727994309210441	0.690707585170939	-4.51064159870103
Q9GZX9	TWSG1	0.0854806909282149	3.40504188776336	1.97140301337592	0.100669638271592	0.716454048997822	-4.51396252982614
P53582	METAP1	0.0507092415553841	3.34174375238237	2.36239042303688	0.0600599700710114	0.667644697400095	-4.51415048466614
P42766	RPL35	-0.124610521173902	3.37793039724046	-2.16818914622305	0.0775116815553787	0.695366842612303	-4.51433464027156
Q96CW1	AP2M1	-0.0623919752008057	3.34661278509386	-2.48363714384167	0.0513168670294045	0.663179035285209	-4.51457407472884
Q69YH5-1	CDCA2	-0.0649114991897414	3.37466310600586	-2.56013778695092	0.0465085163160927	0.656640918778751	-4.51468845325697
Q9BQ24-2	ZFYVE21	0.0803694336784565	3.41787101506309	1.95582368312246	0.102783739368135	0.721707319974619	-4.51470434543423
Q5QJ74	TBCEL	0.0947389586399784	3.30854352237499	1.8205062193361	0.123153466954242	0.733441736359969	-4.51507956822876
Q96I76	GPATCH3	0.127616680694015	3.30409726822445	1.84597055365202	0.119030633814972	0.733441736359969	-4.51546242803634
P17707-1	AMD1	0.0937124907664703	3.3650170577657	1.90310699874766	0.110279033187153	0.725032462556748	-4.51587847118937
Q9BUL5-1	PHF23	0.125376660528347	3.34673160272151	1.90683733164338	0.109730833210179	0.725032462556748	-4.52187398955558
Q96DE0	NUDT16	0.123748556133517	3.25109207485504	1.86366942930958	0.116247170888024	0.732223559156751	-4.52246128613014
Q8N720-3	ZNF655	-0.131622841056158	3.27352204016961	-1.58643898839491	0.168348156415146	0.753114235459805	-4.52288428499403
P25774-1	CTSS	0.235409266426354	2.80491901861516	1.60171214939302	0.164958839330775	0.751123342519793	-4.52379809220992
P61457	PCBD1	0.1457263153218	3.20069350116409	1.5307820314052	0.181275984304699	0.7641205515961	-4.52434732578236
Q93015-2	NAT6	0.172656611603086	3.15383339576094	1.44612254404806	0.202770387114697	0.771891079404301	-4.52491762813231
Q9H9K5	ERVMER34-1	-0.109549450821074	3.33672457463897	-1.66517352194303	0.151572177318699	0.749139109615353	-4.52653209305204
Q8IZQ1-1	WDFY3	0.0550190149090194	3.37457742429678	2.38576408627425	0.0582584412616579	0.667644697400095	-4.52655551502608
Q9NV66	TYW1	-0.152606682833945	3.30485137670637	-1.88485600440116	0.113001443361526	0.727089788587402	-4.52688944512379
Q86Y37	CACUL1	-0.0947852553064103	3.34175280695237	-2.10795507029678	0.0839473040544913	0.697991490104712	-4.52840878167454
Q5HY92	FIGN	0.54517373187662	3.34889080117148	1.38982475518445	0.218366384644429	0.779937206141629	-4.5287965262886
Q96RN5	MED15	-0.0586443901374189	3.328244508569	-2.13495055114243	0.0809968417920988	0.695366842612303	-4.5303883580103
Q9HDC5	JPH1	-0.112445904806653	3.36435960572561	-2.06331930973199	0.0890727726229872	0.699382798796779	-4.53218358505388
Q86X95	CIR1	0.119880791308176	3.27619697874317	1.8149219660337	0.124076595054831	0.733441736359969	-4.5325515319047
Q8WVK2	SNRNP27	0.0991560338838958	3.26164042865007	2.04654345272716	0.0910818716939045	0.705368538636562	-4.53412671813101
Q9Y4F1	FARP1	-0.0897652325521893	3.35509330984079	-2.30842855669894	0.0644486263116303	0.667644697400095	-4.53415445604458
Q9NY12-1	GAR1	-0.105477897638385	3.24771996260816	-2.04628516491682	0.091113167594999	0.705368538636562	-4.53487864168863
O15151	MDM4	-0.107752777416024	3.42007671851042	-1.70253602577533	0.144194119147362	0.748450060170893	-4.53618219813986
P00568	AK1	0.0842149111213306	3.19890398664208	2.12330459039111	0.0822562364555745	0.695775512805027	-4.53625342217805
O00767	SCD	-0.143334261688285	3.40235225286245	-1.92911259451287	0.106514435901131	0.722811621274888	-4.53822200681356
P43243	MATR3	-0.0552706399420414	3.31970245469512	-2.69624599358196	0.0391118028920151	0.653955463216203	-4.54039703943607
Q15526	SURF1	-0.176964367473927	3.33366371202723	-1.48539872851312	0.192514646814825	0.76773129536073	-4.54043483411699
P30825	SLC7A1	-0.150242409784386	3.23269222084828	-1.91202802355229	0.108972621053676	0.725032462556748	-4.54187383679425
Q6ZV73-1	FGD6	0.0526510199210653	3.40197376713536	2.32505552618482	0.0630612641768755	0.667644697400095	-4.54201761127516
O95551-2	TDP2	0.0881342465628242	3.35388733819607	1.88602862305	0.112824500932532	0.727089788587402	-4.54294652196739
O94760-1	DDAH1	0.110665606162125	3.28999593545025	2.32364292794339	0.0631778947209463	0.667644697400095	-4.54399858123279
O14908-1	GIPC1	0.0708057346928835	3.31383264164265	2.02151511631943	0.094166565047263	0.71036960377837	-4.54459434017366
Q5JPI9	METTL10; EEF1AKMT2	0.104567229343438	3.3326115653385	1.74600285232624	0.13605535511191	0.734995534891536	-4.54664946377395
P00338-3	LDHA	0.065546921709863	3.07868057060898	2.68701325240012	0.0395710013637529	0.653955463216203	-4.54669933787789
P50148	GNAQ	-0.164600538533251	3.31601660478452	-1.8799309822436	0.113747676644831	0.727089788587402	-4.54858173805147
Q9Y6X3-1	MAU2	-0.0769944690230038	3.30041900296849	-1.97532942537469	0.100143876340935	0.716105600093805	-4.54885635353405
Q13608	PEX6	-0.0669453315465818	3.34479099542501	-2.10719532409134	0.0840319378717903	0.697991490104712	-4.5488918657904
Q8WVZ9	KBTBD7	-0.164943985583243	3.3918966598398	-1.93370653469704	0.105863118003932	0.722811621274888	-4.5492845874823
Q9P287-2	BCCIP	0.188408188905227	3.28708971085549	1.43900490057839	0.204683069194937	0.77620497100392	-4.54966094664638
Q9HCU4	CELSR2	-0.12288591251701	3.32515904890467	-1.98557206321385	0.0987855354925146	0.716105600093805	-4.55044435059092
P50552	VASP	0.116302313192332	3.43169068443331	2.40726393805162	0.056652020592117	0.667644697400095	-4.55076309505356
Q92820	GGH	0.0810658472090987	3.30561903626815	2.31491738123567	0.0639033932016303	0.667644697400095	-4.55148627563339
Q9H6U8-3	ALG9	-0.182815829884895	3.2411914067323	-1.57580974395304	0.170746526147984	0.754155065404338	-4.55204931048724
Q9NR19-2	ACSS2	0.0904191906210889	3.36220182291786	1.97643576093623	0.0999962416325984	0.716105600093805	-4.55323280182486
Q9UQN3-1	CHMP2B	0.126334252774501	3.32217428496143	1.85400268130117	0.117759208335716	0.733441736359969	-4.55328153679065
Q15283-1	RASA2	0.0795954394189774	3.24050392037398	2.21723208537025	0.0726528115169824	0.690707585170939	-4.55331360525691
Q8TAM2-1	TTC8	0.0999378453356127	3.09148392769083	1.67269180308702	0.150058330959808	0.749139109615353	-4.55352249811941
O00217	NDUFS8	0.0819615409788058	3.27266189623135	2.09059909119064	0.0859029715867649	0.697991490104712	-4.55422042992594
Q9H2E6-2	SEMA6A	-0.10440362951997	3.41958103654729	-2.38279182607839	0.0584843068980963	0.667644697400095	-4.55443995438065
Q05469-1	LIPE	-0.129512425461709	3.35625890490419	-1.51228853413951	0.1857781984887	0.7641205515961	-4.55571021060881
Q92990	GLMN	0.0691389803500804	3.39317495662569	2.41987825060025	0.0557315181241806	0.667644697400095	-4.55750742867667
Q8ND25-2	ZNRF1	0.121282775025016	3.3211854193326	1.60216628298264	0.164859078834268	0.751123342519793	-4.55905282571952
Q6PKC3-1	TXNDC11	0.113901567903265	2.64637194918377	1.54530949024318	0.177812576643104	0.763390088419637	-4.55940852284531
Q01415-1	GALK2	0.0780884447978773	3.08042515985665	1.85513376893333	0.117581268144693	0.733441736359969	-4.56005327234185
Q9HC98-2	NEK6	0.130774686494345	3.18548510899602	1.55830002073642	0.174769346156532	0.75881744409333	-4.56014193300474
Q7L1T6	CYB5R4	-0.0898083177064934	3.14579328311807	-1.75939581561586	0.133640625203012	0.734995534891536	-4.56042862067623
Q9NRZ5	AGPAT4	-0.132213391186979	3.37457760539422	-1.98566992617504	0.0987726486692331	0.716105600093805	-4.5605705331748
Q96ER3	SAAL1	0.111095312145161	3.35591804310204	2.18825946725798	0.0754833706985214	0.692419402141054	-4.56074693641106
P55197	MLLT10	-0.0890286042251917	3.31478885470044	-1.94680372222334	0.104028409820288	0.722811621274888	-4.56110347416334
Q9H211	CDT1	0.17656092256816	3.26953220419205	1.35701633496539	0.227960918936909	0.784100603281352	-4.56303882961201
O95989	NUDT3	0.0822397707036822	3.41351942440485	2.07318955933382	0.0879121447776819	0.697991490104712	-4.56321679867821
Q9NXB0-1	MKS1	-0.154481961486309	3.26987477344727	-1.3596651127489	0.227172139004479	0.784100603281352	-4.5653897482213
O00165-2	HAX1	-0.0988379867460169	3.18325880714344	-1.9597779775061	0.102242886458362	0.719639839365647	-4.56618844924835
Q2QGD7	ZXDC	-0.165750288468167	3.34512036676431	-1.6687768445931	0.150844770250709	0.749139109615353	-4.56635381897144
Q9H0W9	C11orf54	0.0938476694650279	2.93924891208418	1.98213002673576	0.0992398882225816	0.716105600093805	-4.56670346198551
Q9C0D0	PHACTR1	0.157744929904593	3.38688688428986	1.46200848060694	0.198561798916396	0.768988450927102	-4.5669945894379
P28340	POLD1	0.0405168112083098	3.34854850373713	2.46300256383487	0.052703226391777	0.663179035285209	-4.56744128123958
Q5KSL6	DGKK	0.117206410361214	3.35864635075501	1.80710396429091	0.125380646721074	0.733441736359969	-4.5677867096916
Q8IZJ1	UNC5B	-0.11494651591199	3.34256425765811	-1.69183497578828	0.146270422846052	0.749139109615353	-4.569659890609
P45877	PPIC	-0.148392714181837	3.23817635431783	-1.65945342326566	0.152733961728511	0.749139109615353	-4.57051484571169
Q02535	ID3	0.124208276085941	3.43596710256747	1.61185422400017	0.162744783946227	0.751123342519793	-4.57120154910885
Q8NG11-1	TSPAN14	-0.117163611678603	3.31773198888766	-1.5559621704176	0.17531330951606	0.759460028575501	-4.57135562544334
Q9Y4J8-1	DTNA	0.11510371251973	3.22915086719401	1.63358985743416	0.158096567824503	0.749176570938597	-4.57163329053731
P00533-1	EGFR	-0.0914119256554744	3.16949770717419	-1.72528483868229	0.139876309003749	0.741298507691405	-4.5719653686708
Q9C030-2	TRIM6	-0.102200901541082	3.35985383906422	-1.89150961669219	0.112001157836882	0.726290966137758	-4.57245681131898
Q8N9V3	WDSUB1	0.127791704304565	3.18773994989928	1.8715132196672	0.115034682054201	0.730240205305933	-4.57278510715379
P30504	HLA-C	-0.152736019941224	3.34292887344693	-1.61357596701505	0.1623717935301	0.751123342519793	-4.57330471015864
P49116-1	NR2C2	-0.103640222704635	3.1546795038107	-1.796593767879	0.127155410733086	0.733441736359969	-4.57341269430094
Q96E17	RAB3C	-0.268462811633447	3.37237959556478	-1.54253013091792	0.178470250226294	0.76407575878132	-4.57831270993138
Q92945	KHSRP	0.0970993201371829	3.32507554749678	2.91390436218554	0.0298057560553635	0.652299696702783	-4.57863691507069
O75880	SCO1	-0.223379652541583	3.33987996424972	-1.75593017641774	0.134261359963968	0.734995534891536	-4.57888814451487
Q8IZC4-1	RTKN2	0.0911401158529384	3.39322058294981	1.90105981278353	0.110581062186605	0.725032462556748	-4.57909490241192
P07711	CTSL; CTSL1	-0.0916053201151072	3.31438370686421	-1.92268690698337	0.10743230176365	0.723000543097124	-4.58164746611715
Q9Y316-3	MEMO1	0.104760781745037	3.30505155242237	1.92627691237626	0.106918506365846	0.722811621274888	-4.58183831400799
Q9BVK6	TMED9	-0.0881440714015358	3.32947461122509	-2.11407006505495	0.0832693235019024	0.696474886497503	-4.58236786145622
Q5TB30	DEPDC1	-0.151316439631227	3.35056829158276	-1.41701075039918	0.21070063440859	0.77771670566293	-4.5824910892911
O14757	CHEK1	0.103320083385325	3.42052687162628	2.3909995095735	0.0578628480806894	0.667644697400095	-4.58480716934326
Q96GG9	DCUN1D1	0.107028421320702	3.27547426731424	1.90878709753273	0.109445401963047	0.725032462556748	-4.58781428430797
P10645	CHGA	-0.0799228947460893	3.37175628092792	-2.14428861633871	0.0800015267321476	0.695366842612303	-4.58797805903348
Q14BN4	SLMAP	-0.212767959486418	3.27844216320012	-1.77609672964029	0.130689112488345	0.734995534891536	-4.58823218484041
Q9BRX2	PELO	0.0892236135729493	3.35627020585278	2.07586382017409	0.087600383117237	0.697991490104712	-4.58829290098546
P27816-4	MAP4	-0.100596044816549	3.36482205257742	-1.65718606707314	0.15319688278428	0.749139109615353	-4.58862654048674
Q9P2E5-1	CHPF2	-0.112257406633931	3.29379824078028	-1.61074128755461	0.162986327626625	0.751123342519793	-4.5899092940452
O95466-2	FMNL1	0.165638907180426	2.27258189327092	1.79128486186172	0.128061407417363	0.733441736359969	-4.59072210340713
Q9NRX4	PHPT1	0.114428027060659	3.23371886109168	1.99379099469109	0.0977092286561737	0.714774775611695	-4.59155168223554
Q8IXJ6	SIRT2	0.122918161092561	2.82690201810689	1.52510007627708	0.182648052405763	0.7641205515961	-4.59265028995711
Q9BY27	DGCR6L	-0.107139126368804	3.32784132652615	-1.52953397711137	0.181576515996064	0.7641205515961	-4.59345639437985
Q9Y5Z4-1	HEBP2	0.0773891067432187	3.28981722415286	1.92515250810633	0.107079159803883	0.722811621274888	-4.59554280847867
Q8NBT0	POC1A	0.0794947775351322	3.37106584065284	1.85943398594174	0.116907238368389	0.733263163684083	-4.59602800882573
P15498-1	VAV1	0.0894461505930554	2.39903073490051	1.94109108169544	0.104824642282169	0.722811621274888	-4.59715928587412
Q9BRT2	MNF1; UQCC2	0.0916169108950285	3.29740670545719	1.90945199676332	0.109348238067475	0.725032462556748	-4.59974162557535
Q9UDX5	MTFP1	-0.188371860030752	3.34991420239496	-1.2524557384442	0.261162073778621	0.796869865818046	-4.60000260030542
Q9C0B1-1	FTO	0.0990152877324628	3.29477444326296	2.31732385352042	0.0637024275412021	0.667644697400095	-4.60029373222468
Q13454-1	TUSC3	-0.218310199720435	3.43089410881184	-1.4587713888254	0.199412666793947	0.769729154961056	-4.60247443670539
Q5T6C5	ATXN7L2	-0.127138911048638	3.39719210791706	-1.58366224626713	0.168971541144976	0.753114235459805	-4.60374361736995
Q9UGI8	TES	0.0522869925437837	3.11904399675439	2.37184878439334	0.0593239369119959	0.667644697400095	-4.60471903554389
Q9UHL9-3	GTF2IRD1	-0.0671118753316785	3.30001627991049	-1.93328919427104	0.10592211973077	0.722811621274888	-4.60647145922828
O95707	POP4	-0.0746989885511423	3.3538164757817	-1.88223449509488	0.113398032632149	0.727089788587402	-4.60731991748429
O14832	PHYH	-0.0638226691677496	3.27496475233027	-2.21390028794367	0.0729725831251148	0.690707585170939	-4.60821658176932
Q9P2I0	CPSF2	-0.040081581493784	3.31824417303637	-2.59576349491276	0.0444367167691977	0.656640918778751	-4.60953573725268
O00329	PIK3CD	-0.160206805359207	3.35125304406757	-1.48257587073523	0.193235108155528	0.76773129536073	-4.61010075700406
P09132-1	SRP19	0.210854922973558	3.37256396823854	1.80860808694898	0.125128695047024	0.733441736359969	-4.6118786558009
Q9H668	OBFC1; STN1	0.232555897866962	3.26420798656166	1.14218439110267	0.300779924332176	0.806321739619344	-4.61243641185535
Q9Y4D1	DAAM1	-0.148076496093559	3.33370843904172	-2.13745641084797	0.0807284908297182	0.695366842612303	-4.61348148284637
Q8NEZ2	VPS37A	-0.124559689373932	3.36216082404749	-1.84474115696346	0.119226454378924	0.733441736359969	-4.61453818421303
Q9NZI7	UBP1	0.0614386954765819	3.27411600288976	2.0975323376699	0.0851161279145997	0.697991490104712	-4.61468309837975
Q9UGK8	SERGEF	0.108362689711812	3.26614208834738	1.66893611610978	0.150812696986551	0.749139109615353	-4.61500914177639
Q5PSV4	BRMS1L	-0.0843861874590006	3.24942564917605	-1.82654045439526	0.12216369695007	0.733441736359969	-4.61531160522445
Q96E11	MRRF	0.0703223160735491	3.34596053733056	1.92353142634745	0.107311210168485	0.72281967024813	-4.61556816794798
Q9UBR2	CTSZ	-0.093092581615321	3.38464652086073	-1.80964675583462	0.124955006374707	0.733441736359969	-4.61644852272504
Q9H040-1	SPRTN	0.218507687506098	3.17892165601363	1.47146957778648	0.196094515482899	0.768988450927102	-4.61759179581489
P61758	VBP1	0.167235459023576	3.27899883326385	1.89030705247232	0.112181281917785	0.726290966137758	-4.61897280205142
P08397-1	HMBS	0.128016881184057	3.28875308837326	2.13788486314616	0.0806827008724404	0.695366842612303	-4.61942344232866
P02786	TFRC	-0.113922990918249	3.17415727146992	-2.34962495299215	0.0610687620314616	0.667644697400095	-4.61969929150349
P17661	DES	-0.204739086613013	3.20106873019992	-1.10913542472495	0.313625020676156	0.808783582731922	-4.62115900718423
Q9UIM3	FKBPL	0.0868079309178139	3.30092279689439	1.85137587566676	0.118173499272445	0.733441736359969	-4.62166036099439
P41208	CETN2	-0.153732215939544	3.32797881405784	-2.13666222321678	0.0808134395658358	0.695366842612303	-4.62275998463408
Q96PD2-2	DCBLD2	-0.127405134418758	3.35877201896154	-1.89324252353339	0.111742112352592	0.726290966137758	-4.62281231982531
Q9Y5R8	TRAPPC1	0.0825462608936161	3.31256979602135	1.80068806609976	0.12646107347384	0.733441736359969	-4.62351247811126
Q8N7C3-2	TRIML2	0.107529307074272	3.43563017333127	1.50847247826732	0.186720377248214	0.7641205515961	-4.62550979608039
P53992	SEC24C	0.0537178948769233	3.28939158660292	2.4566090996572	0.0531408666224848	0.663179035285209	-4.62611527667931
Q9H0Q0	FAM49A	0.117497556917346	3.36111376616997	1.60376746666982	0.164507809478222	0.751123342519793	-4.62684037452592
Q05BQ5	MBTD1	-0.0903634224509673	3.35237431299719	-1.9384170803748	0.105199478413621	0.722811621274888	-4.62704846869892
Q96AB6	NTAN1	0.109590374762464	3.27417367000102	1.47672996208494	0.194735239686394	0.768523024112149	-4.62798300114211
Q9NQY0-1	BIN3	-0.116034706157374	3.34067780441423	-1.58825290433922	0.167942128310442	0.752161125742972	-4.62954900973471
Q9HB09-1	BCL2L12	-0.0912204444191092	3.31344544294784	-1.74210441673738	0.136766341833582	0.73633078915596	-4.62994856277083
O95218-2	ZRANB2	0.118534282048028	3.31742202313367	2.29448619958717	0.0656368522581432	0.667644697400095	-4.62997220994637
P27105	STOM	-0.0994202419992979	3.26296721811191	-1.92464285742205	0.107152058889612	0.722811621274888	-4.63004716706883
O43865	AHCYL1	0.0747552551014	3.35457069397458	2.11601099557606	0.0830553199584596	0.696474886497503	-4.63139901822228
Q8WYH8-1	ING5	-0.0920053513646269	3.33131977539802	-1.69721577376059	0.145222743394856	0.749139109615353	-4.63208600937587
Q92889	ERCC4	0.0781284591316489	3.0961564511567	1.9843094944186	0.0989519480457948	0.716105600093805	-4.6329090750105
O43924	PDE6D	-0.141156037261891	3.19299073750513	-1.43610791674512	0.205466387837162	0.776986386711222	-4.63569014746652
Q8TB45	DEPTOR	0.109260265658407	2.30316271338996	1.59981048245786	0.165377217946731	0.751123342519793	-4.63632394565019
P14550	AKR1A1	0.0786001203611863	3.34385719388364	2.24481188571566	0.0700616306072657	0.683858562365067	-4.63642298483547
Q14181	POLA2	0.0900480734125163	3.32887914915039	2.02314270933113	0.0939627349134349	0.71036960377837	-4.63664773416636
Q12772	SREBF2	-0.128725499142981	3.38133384620102	-1.99558914480318	0.0974753598966355	0.714774775611695	-4.63664788218311
P08138	NGFR	-0.178739564020762	3.23486533033489	-1.29587243250165	0.246878939508957	0.791015351126171	-4.63665389084707
P78406	RAE1	-0.0438935192576875	3.26534864254941	-2.45359241021994	0.0533487099680602	0.663179035285209	-4.63748011126389
Q13472-1	TOP3A	0.0737656214424338	3.29339972594679	2.1296985696248	0.0815622895493959	0.695775512805027	-4.63794488381558
Q9Y3E5	PTRH2	-0.333509265552388	3.29003402936007	-1.96972714670537	0.100894902344122	0.716727491466766	-4.63935329132248
P28161	GSTM2	0.104938017632551	2.82652864992834	1.73156845460593	0.138706347335333	0.740016586066525	-4.64031614615681
Q5SWX8-1	C1orf27; ODR4	-0.143236680714793	3.3226785011812	-1.97304322034368	0.10044966555206	0.71621731795112	-4.64171187941376
P12259	F5	0.264519361879993	1.41459509051832	1.70449655969321	0.143816880217239	0.747380648769817	-4.64393909014511
P15529-2	CD46	-0.183130362072806	3.20400840745866	-1.86767235207151	0.11562679744825	0.732095392566641	-4.64452113703734
Q9NQC7	CYLD	0.113328870588112	3.14717230676359	1.72241892948492	0.140413156504705	0.741959303484021	-4.64478397403984
Q6P2H3-1	CEP85	-0.0966382040790226	3.36410629381653	-2.0803983286899	0.0870743681884437	0.697991490104712	-4.64637507881764
Q9GZR2-1	REXO4	-0.0840876633005096	3.29223503223629	-2.07766771918205	0.0873907332787346	0.697991490104712	-4.64715786311154
P06276	BCHE	0.107402572328758	3.30664384114365	1.55120368475121	0.176425523835628	0.759715623432772	-4.64779115728345
O15120	AGPAT2	-0.158327062652854	3.34305624978095	-1.42814650660298	0.207633551931247	0.776986386711222	-4.64790979715048
Q8WVD5-1	RNF141	0.122286255739476	3.37603032881915	1.60150188820963	0.165005047655199	0.751123342519793	-4.64836437225747
Q9BXI6-2	TBC1D10A	-0.19560867873408	3.0836236864035	-1.05754125548652	0.334606006814635	0.817829395468225	-4.64914028672957
Q96DN5-1	WDR67; TBC1D31	-0.0890394508265779	3.29519572622058	-1.63564676231373	0.157663445211601	0.749139109615353	-4.65015896409886
Q5T0W9	FAM83B	-0.0848911341895804	3.39934275551276	-1.76754590746077	0.132192079355823	0.734995534891536	-4.65025823752717
A4D1U4	KIAA1147	-0.106740912385581	3.29507405032856	-1.50935807100853	0.186501321476241	0.7641205515961	-4.65072796567084
Q9UJ55	MAGEL2	0.158213139217744	3.37457011126256	1.22663085333708	0.270003692826973	0.797638941612837	-4.65268206760911
Q9P0Z9	PIPOX	-0.098155432201879	3.40423703783467	-1.90028858603622	0.1106950615799	0.725032462556748	-4.65273987987299
P78330	PSPH	0.0634127270231596	3.30471727843989	2.02425976705043	0.0938231039315776	0.71036960377837	-4.65389206548875
Q9BQG0-2	MYBBP1A	-0.0789871585632355	3.33064597122646	-2.80746914412208	0.0340127234441229	0.652299696702783	-4.65416545495504
P29373	CRABP2	0.0921568088288571	3.37706195704722	1.83203143802086	0.121269976615467	0.733441736359969	-4.65584166263041
Q9BSF8-2	BTBD10	-0.103536766461327	3.36318139807625	-1.57459008260971	0.171023827415557	0.754945226658318	-4.65596390209198
Q96H20-1	SNF8	0.0777903933130209	3.27943333677636	2.07621068308995	0.0875600301987687	0.697991490104712	-4.65658055758639
Q93100-1	PHKB	-0.0652577975720124	3.25492798114471	-2.13794001150082	0.0806768089701567	0.695366842612303	-4.65853233731548
Q9NXN4-1	GDAP2	0.0809132634484618	3.22014700162443	1.8938200370126	0.111655917025829	0.726290966137758	-4.65981443809658
Q9BUZ4	TRAF4	0.0891795596968333	3.39109371018573	2.06812748964341	0.0885054199188293	0.697991490104712	-4.65982279686399
Q9C0D5	TANC1	0.0798148829007927	3.20208438813248	1.97525379729223	0.100153976655455	0.716105600093805	-4.65995384634958
O14525-1	ASTN1	-0.207863549193031	3.2496550721255	-0.90240019104104	0.404733375055716	0.847465735105745	-4.66106049965252
O75600-2	GCAT	-0.0936455768033683	3.28615511366969	-1.59664118792891	0.166076766369531	0.751123342519793	-4.66127894800911
Q8IYW5	RNF168	0.0969038300983537	3.3163444973302	1.71513968012796	0.141785893022075	0.744036505653461	-4.66143335927518
Q9UL46	PSME2	0.0968849078935956	3.17971222091034	2.13448632883706	0.0810466569255578	0.695366842612303	-4.66182171556352
Q8TDQ7	GNPDA2	0.116604095398151	3.05018427780414	1.50547473731722	0.187463700507378	0.764423279376019	-4.66257780919327
P56747	CLDN6	-0.13797908512788	3.43351328086905	-1.92588870444138	0.106973945285437	0.722811621274888	-4.66531351694533
Q9H3C7	GGNBP2	0.0708423474227465	3.29839270033811	1.89712595997749	0.111163794843768	0.726290966137758	-4.66579204795083
Q8NI22	MCFD2	0.310232270550201	3.26347414259602	1.56449745368332	0.173335184257338	0.756873951976266	-4.66589471431029
Q3MIT2	PUS10	0.130162951800591	2.52770909526258	1.34951751207517	0.230207643667313	0.78497442161603	-4.66617727513015
O75530	EED	0.059985276664644	3.26898265795711	2.27381478728089	0.0674413001399283	0.67108904626917	-4.66692987250257
Q8TBB5	KLHDC4	0.0535010719755708	3.38203016613383	2.20763503897003	0.0735778976593031	0.690707585170939	-4.66785683165821
P57071	PRDM15	-0.113201856734356	3.33783144149499	-1.4164744802659	0.210849398415822	0.77771670566293	-4.66861749803469
Q9UBC1-1	NFKBIL1	-0.106130621683416	3.23881151437527	-1.42322636214289	0.208983516917837	0.777714595683037	-4.66929644764953
Q5XUX1-1	FBXW9	0.0923529524337121	3.27871108202164	1.56374338152552	0.173509079318864	0.757103311600812	-4.67035742459305
P52597	HNRNPF	0.0888318241099926	3.31970510729902	2.5381841547525	0.0478368337775047	0.656640918778751	-4.67123503143386
Q8NFL0	B3GNT7	-0.117615739320802	3.42336894665371	-1.52868666974264	0.181780818912407	0.7641205515961	-4.671365786956
Q9Y692-2	GMEB1	0.0683655130373849	3.26634160167701	1.95488246690279	0.102912905116297	0.721707319974619	-4.67148627549357
Q13158	FADD	-0.150904567083931	3.28845986417126	-1.35358906838862	0.228985256174823	0.784100603281352	-4.6717992654984
O75140	DEPDC5	-0.07905284456005	3.30219166655607	-1.72506302138234	0.13991778765593	0.741298507691405	-4.67246536903571
O14681	EI24	-0.134431596664735	3.31605619511737	-1.54670340857915	0.177483611772643	0.762404406226045	-4.67348435985994
Q14432	PDE3A	0.135950070787106	3.42943256351402	1.26685019807436	0.256346602856102	0.79390101232215	-4.67470450760306
Q9H0B6	KLC2	-0.0775915788079254	3.2419649524819	-2.29380998140642	0.0656950675239871	0.667644697400095	-4.67540455714529
P20936-1	RASA1	0.0595969252903411	3.26961727645907	2.21699283688308	0.0726757245115477	0.690707585170939	-4.67554289930916
Q9NWQ9	C14orf119	0.0974587512048848	3.40211914538162	1.86167826428173	0.116557011938307	0.732971635730076	-4.67677404194331
Q9BUL9	RPP25	-0.0875202815749271	3.28271371738336	-1.73929551799845	0.137280904586422	0.737032260312829	-4.67689792072304
Q8IVH8	MAP4K3	0.0459282527458006	3.38326551461314	2.20342061018345	0.073988031650537	0.690707585170939	-4.67813839850576
Q8TBK2	SETD6	0.0922763820885647	3.39308124718319	1.60645336210933	0.163920202968482	0.751123342519793	-4.67876915827815
Q9Y2P8	RCL1	-0.0552142464689486	3.31565624489655	-2.05744254323489	0.0897713230221516	0.701866875138691	-4.67965758858551
Q8N0Z8	PUSL1	-0.102725312755609	3.29710372877851	-1.62585307217661	0.159736103421312	0.751123342519793	-4.67974462408333
Q92556-1	ELMO1	-0.142311423421717	3.00349937108786	-2.11506154178705	0.0831599335678759	0.696474886497503	-4.68007139957267
P78316	NOP14	-0.0764230202683262	3.30785226716092	-2.44454679083295	0.0539771571249772	0.663179035285209	-4.68168500481022
O43281-1	EFS	0.130874091335586	3.33426683351939	1.24619328854039	0.263282166271902	0.797304002637856	-4.68229843936245
Q9H977	WDR54	0.14910217327994	3.26250920692622	1.75915003954357	0.133684552292006	0.734995534891536	-4.68353208176265
Q96T21	SECISBP2	-0.125478032233565	3.33867706490253	-2.1392809835064	0.080533680915204	0.695366842612303	-4.68540301835326
O75340	PDCD6	0.0956411143573108	3.25496504410198	1.94331796482943	0.1045135211908	0.722811621274888	-4.68728850906037
Q6FIF0	ZFAND6	0.131988509016572	3.42873453426373	1.87983752528565	0.113761885219703	0.727089788587402	-4.68746029573595
Q9NX47	MARCH5	-0.248133970651844	3.24964578007944	-1.40959157842534	0.212767453841193	0.778691920506784	-4.68769936815201
Q02543	RPL18A	-0.0314079277713107	3.37802691294129	-2.54310158109205	0.0475357959649154	0.656640918778751	-4.68771627570198
O95872	GPANK1	-0.106576938815504	3.3248927062259	-1.45285823707908	0.200975796957326	0.769729154961056	-4.68880129751613
Q8WVT3	TRAPPC12	-0.0515339328911062	3.3169077853673	-2.12348266298812	0.0822368271223121	0.695775512805027	-4.68938304998295
Q92466	DDB2	0.0913094997754167	3.02618869585449	1.87365196595419	0.114706297517556	0.729707060161435	-4.68996108968637
P29374-1	ARID4A	-0.0787638115725381	3.28718459175669	-2.06594679719766	0.0887622716504812	0.697991490104712	-4.69210961479588
Q96KQ4	PPP1R13B	0.0997368781441035	3.3227131300897	1.71613234289824	0.141597916608094	0.744036505653461	-4.69226302622524
Q68CR1-1	SEL1L3	-0.196129014719731	3.37204032487294	-1.87808299369109	0.114028965940903	0.727089788587402	-4.69272861529098
O43516-3	WIPF1	0.0895709307036342	2.53209187098693	1.62134572806209	0.160698888441236	0.751123342519793	-4.69316998505355
Q9H9A5-6	CNOT10	-0.0708461106106602	3.33152533684029	-2.29755430528359	0.0653734040414712	0.667644697400095	-4.69383880668383
Q9BY41	HDAC8	0.128422476666328	3.0893108274944	1.25366995968288	0.260752775988266	0.796535411373001	-4.69447293154917
Q9NZ72	STMN3	-0.0975852797547154	3.32725131794516	-1.45062042850315	0.201570355253835	0.769729154961056	-4.7001265555444
P41217-3	CD200	-0.136581246001332	3.39256940599048	-1.28630806888834	0.249963688737035	0.791792493802863	-4.70033709151442
P60891	PRPS1	0.067673570954153	3.34157305582923	2.14805921997792	0.0796032482688342	0.695366842612303	-4.70116355403518
Q99807-1	COQ7	-0.132190660901289	3.25203027742604	-1.31358633778535	0.241256458996157	0.789594391611883	-4.70121329976147
Q04727-1	TLE4	0.114252241926908	3.11655458145237	1.55158812309104	0.176335417145042	0.759715623432772	-4.70132320979215
P43490	NAMPT	0.0767736017131356	3.23340942083458	2.42082068657756	0.0556633887744864	0.667644697400095	-4.70146308955354
A4D1S5-2	RAB19	0.114841755776808	3.44083689778365	1.34100877735661	0.232781505573053	0.786410005484476	-4.70148743161887
Q9HCE6	ARHGEF10L	-0.0895233344245751	3.45805238600167	-1.7363390509387	0.13782457359853	0.738916931270385	-4.70254019477558
P30990	NTS	0.0994456944066184	3.41934540402214	1.56121174244298	0.174094123307106	0.757600745327352	-4.70354991259429
P55058	PLTP	-0.109753680027025	3.3762412948734	-1.64298526902821	0.156127580259593	0.749139109615353	-4.70371944319334
Q15583	TGIF1	0.0959506161734986	3.45088340421556	1.76072562919421	0.133403198979692	0.734995534891536	-4.70381293492753
Q96JC1-1	VPS39	-0.0727934441390376	3.27842439651703	-2.09891802606642	0.0849597662485232	0.697991490104712	-4.70407025738546
P51797-5	CLCN6	0.160041151543646	3.38981621238597	1.48461176053458	0.192715244105676	0.76773129536073	-4.70479708988208
Q9P0V3-1	SH3BP4	-0.0566573609730714	3.34713287525519	-2.19382726323525	0.0749305781987761	0.692419402141054	-4.70529082038478
Q9BT78	COPS4	0.0501210856498072	3.32213114612801	2.45805487049543	0.0530415630807588	0.663179035285209	-4.70605475739005
Q9Y6X5	ENPP4	0.114907842583356	3.00637700368797	1.41197507209176	0.212101415921744	0.77771670566293	-4.70609608790124
Q6GQQ9-1	OTUD7B	0.0687017457850122	3.26721090235498	1.86749458121349	0.115654277344991	0.732095392566641	-4.70818091415773
Q9NPH0-1	ACP6	-0.0818289714235347	3.12505088842233	-1.79386107716812	0.127620957835759	0.733441736359969	-4.70820472702814
Q92782-2	DPF1	-0.12045783460513	3.27864194476043	-1.52339953470328	0.183060619686389	0.7641205515961	-4.70908890099342
Q9NSI6-2	BRWD1	-0.0652504436893086	3.33212990551681	-2.07278466297217	0.0879594469903243	0.697991490104712	-4.71090199886887
Q4ZIN3-1	C19orf6; TMEM259	-0.204830117624476	3.15847096233253	-1.46809317774029	0.196971684485834	0.768988450927102	-4.711904797995
O43903	GAS2	0.318784869637912	2.11934812020272	1.50884745943138	0.186627593937079	0.7641205515961	-4.71342785389773
Q6NUK4	REEP3	-0.119940893219552	3.27741929351353	-1.40621229759509	0.213715086736585	0.778691920506784	-4.7134924841023
P47755	CAPZA2	0.0622577448114247	3.34020360133807	2.1175221627312	0.0828890970157974	0.696474886497503	-4.71505453268568
Q8IWA4-1	MFN1	-0.0856600701960129	3.32547880345005	-2.40041999154337	0.0571582080094585	0.667644697400095	-4.71556244602124
Q15776	ZKSCAN8; ZNF192	0.149662650873133	3.1535806389554	1.26871238315545	0.255729470590249	0.79390101232215	-4.71628521683527
Q5T5P2-1	KIAA1217	-0.0755625310351935	3.37016096274694	-1.95777820000226	0.102516043994548	0.720901090308131	-4.71660864201666
Q9Y5W8	SNX13	-0.121542361186004	3.30891179316067	-1.3277294985799	0.236851024484904	0.789594391611883	-4.71698284361943
P52198	RND2	-0.0951032789642662	3.36743524109847	-1.47341823656494	0.19558994381621	0.768988450927102	-4.71706757163333
P41214	EIF2D	0.12611407980729	3.24665702818467	2.09595303415066	0.0852947011198603	0.697991490104712	-4.71722975864764
P26583	HMGB2	0.138500263288279	3.25344315957771	2.3878853707848	0.0580978096094239	0.667644697400095	-4.71744004276437
O94788-1	ALDH1A2	0.161216355715503	2.70812727515652	1.16136534956353	0.293534011452093	0.805526338009025	-4.7176178500212
Q8N2K1-3	UBE2J2	-0.127544390864302	3.3700757026953	-1.53040324214072	0.181367146566243	0.7641205515961	-4.7178051055005
Q8NB37	PDDC1; GATD1	0.0904081082104653	3.26913197051282	1.57284608080036	0.171421096370218	0.75539497492953	-4.71904880364825
Q96NT0	CCDC115	-0.110902612747787	3.30849713119448	-1.28679330695529	0.249806354577495	0.791792493802863	-4.71959769511626
O43309	ZSCAN12	-0.16706469934506	3.19857634452118	-1.17161405738918	0.289724631411521	0.804294176947412	-4.71962332805647
Q969G6	RFK	0.0956361292050764	3.06953753719615	1.74088338484651	0.13698978751784	0.736500105001307	-4.72029931833452
Q96EX2-1	RNFT2	-0.110994326554417	3.30845005834123	-1.34539530104904	0.231451327216117	0.786053378664032	-4.72043215408476
Q14699	RFTN1	-0.122899541291318	3.2044873412462	-1.40764794253694	0.213312018416406	0.778691920506784	-4.72082022478311
Q9Y6N6	LAMC3	-0.0926381674934172	3.33249689865737	-1.52050394895614	0.183765162045325	0.7641205515961	-4.72162841785972
Q8IWU2	LMTK2	-0.0709134500317508	3.33389265225794	-1.96015447041935	0.10219154300958	0.719639839365647	-4.72195275931342
Q9NUU6	FAM105A	-0.157326172025493	3.24182534855244	-1.0400966570107	0.341959900847653	0.823194195208237	-4.72273499660576
P31946	YWHAB	0.089322312070735	3.3437298774859	2.21628498770598	0.0727435601147352	0.690707585170939	-4.72277811875901
Q15334	LLGL1	-0.0520206507830576	3.3206091034889	-2.2330772263443	0.0711520602785166	0.689650432134548	-4.72372927600357
Q9H869-9	YY1AP1	-0.12108088061539	3.3060862965152	-1.23868646516368	0.265843698125767	0.797304002637856	-4.72422237347967
Q05682-1	CALD1	-0.0931621732982649	3.3531215036069	-1.46643065896378	0.197404955232484	0.768988450927102	-4.72483871916008
Q8N196	SIX5	0.105352851752696	3.43225358651261	1.50036109865835	0.188738177850005	0.766137196013354	-4.7250157953389
Q5J8M3-1	EMC4	-0.178120395990579	3.3671246394715	-1.42266767341474	0.209137324089701	0.77771670566293	-4.72562222640148
O94832	MYO1D	-0.0918955802257718	3.17582304610921	-2.44303765429105	0.0540827722666756	0.663179035285209	-4.72580297296587
O75618-2	DEDD	-0.153386973080917	3.32492573109764	-1.05461577448602	0.335830024013988	0.819493620939987	-4.72590802809827
Q5BKY9-1	FAM133B	-0.112255810878352	3.39432404019468	-1.59547284630983	0.166335372496964	0.751123342519793	-4.72591416978317
Q9H7C9-1	AAMDC	0.106362712876083	2.98060027124821	1.66137428102108	0.152342855743073	0.749139109615353	-4.72734761655835
Q9UBS0	RPS6KB2	0.16730856535852	3.27956625787857	0.908126752479968	0.401953327999339	0.844359049191984	-4.72748432788699
P78324	SIRPA	-0.141774686387465	3.25743913935411	-1.38318162642424	0.220278486909372	0.781317205082192	-4.72769278409135
Q562R1	ACTBL2	-0.133670444596418	3.32840022297694	-1.44625260772472	0.202735592301074	0.771891079404301	-4.72792863841267
Q8WUQ7-2	CACTIN	-0.0747427068125856	3.30574083496247	-2.16363638168224	0.0779796578839051	0.695366842612303	-4.72854934812473
P27707	DCK	0.104540130671491	3.16029844805439	1.71600428064769	0.141622153386617	0.744036505653461	-4.72885725101346
Q15813-2	TBCE	0.103122079426493	3.33215587405404	2.11263332386097	0.0834281048867578	0.696474886497503	-4.72974176988397
P53804-1	TTC3	0.143109408427511	3.25139032497407	0.601159890702348	0.571722123441163	0.900298056453326	-4.7298685205637
A6NDG6	PGP	0.06321637689183	3.33144464466702	2.1036079414198	0.0844327612623306	0.697991490104712	-4.73201338970304
Q0IIM8	TBC1D8B	0.145147857388723	3.25094079354011	1.12957726619467	0.305625813198805	0.806321739619344	-4.73281293672026
P26374	CHML	0.0741049693111574	3.38933477750995	1.82521636762115	0.122380195242664	0.733441736359969	-4.73408335931678
O95391	SLU7	-0.0629634338599958	3.25070578770227	-2.30148338877696	0.0650376561694311	0.667644697400095	-4.73565668216641
Q9NYR9-1	NKIRAS2	-0.0729855381897743	3.26725152167859	-1.74728531376122	0.135822265712346	0.734995534891536	-4.73641051703364
Q86UZ6	ZBTB46	-0.174912816032394	3.38259081170175	-1.32462782499328	0.237810848461604	0.789594391611883	-4.73787219004888
P10586-1	PTPRF	-0.0603452525534603	3.33236519546216	-2.35627879700525	0.060540717478502	0.667644697400095	-4.73830461807713
P06753-2	TPM3	0.0768678246672487	3.37596881927306	1.91472697008638	0.108580486200114	0.724373469675889	-4.73836342090802
Q96GD0	PDXP	0.0674683220029322	3.08354267451359	1.90516040575941	0.109976926936516	0.725032462556748	-4.73849682934026
P61224-1	RAP1B	-0.16982468466025	3.21403117220529	-1.75841827121361	0.133815424878275	0.734995534891536	-4.73984838639335
O14617-5	AP3D1	-0.102375268874717	3.30382994648203	-1.68098017657687	0.148406605893709	0.749139109615353	-4.74096255062873
Q6KC79	NIPBL	-0.0567062559449952	3.32135576383444	-2.5742955345325	0.0456729785942172	0.656640918778751	-4.74177618017544
Q9UJ70-2	NAGK	0.0896815518016993	3.26600880396239	2.03644895179709	0.0923132784843041	0.709646766063708	-4.74190555021412
Q96R05	RBP7	-0.144787461710139	3.30841412354344	-1.19623238702211	0.280749388020823	0.799305333873119	-4.74228849908734
P54278	PMS2; LOC107984056	0.0597731093400537	3.39207090848004	2.02204141934022	0.0941006042498754	0.71036960377837	-4.74324942412087
P49840	GSK3A	0.0810257905275052	3.34466483975618	1.80375532803925	0.125943393890258	0.733441736359969	-4.74382017959678
Q5JU85-2	IQSEC2	0.130343976577496	3.36409973472461	1.49312690560636	0.19055521794393	0.76773129536073	-4.74415760852965
Q15393-1	SF3B3	-0.0373726693529861	3.31138858230151	-2.74774985488266	0.0366540899104851	0.653955463216203	-4.744318394933
Q9UJW8	ZNF180	-0.138242454158325	3.38299152194839	-0.969312898637288	0.373172039223637	0.83182365908219	-4.74503099064489
O14772	FPGT	0.0796433456735951	3.11664863433348	1.56606193587008	0.172974936683816	0.756873951976266	-4.74517169900492
Q68CZ1	RPGRIP1L	0.123919493919592	3.31314050378345	1.48419120008812	0.192822525582166	0.76773129536073	-4.74556912881733
Q7LDG7-2	RASGRP2	-0.0790424400924614	3.43871345724006	-1.7815551090211	0.129738619246621	0.734995534891536	-4.74565056629374
P38432	COIL	-0.0662577571560825	3.28127713633625	-1.97757340907187	0.0998446607066888	0.716105600093805	-4.746339098263
P21709	EPHA1	-0.125666815369763	3.41344642577572	-2.11512094445799	0.0831533843944707	0.696474886497503	-4.74656107974092
Q9H4G4	GLIPR2	-0.0844322668809016	3.0235447682594	-1.59679395244272	0.166042981540065	0.751123342519793	-4.74681528577455
Q9H2Y7	ZFP106; ZNF106	-0.0555096065141994	3.3529626826406	-2.04985889265598	0.0906811338548649	0.705368538636562	-4.74763924423866
P53004	BLVRA	0.0678667669338432	3.22699166459098	1.93241773733518	0.106045430396699	0.722811621274888	-4.74766783702565
P78332	RBM6	-0.121329456592996	3.32620718615722	-2.32669018791829	0.0629265834337011	0.667644697400095	-4.74986386438305
O00220	TNFRSF10A	-0.1703295938859	3.26277048160193	-1.36098588281232	0.226779764102987	0.784100603281352	-4.74994811989927
P35219	CA8	0.140830250934571	2.31831602411176	1.65234747263762	0.154189361442921	0.749139109615353	-4.75009291336647
P50991	CCT4	0.0831992383480544	3.3441678017996	2.75609654887191	0.0362718475355763	0.653955463216203	-4.75080091709484
Q2M2Z5	PLK1S1; KIZ	0.113150120323481	3.30336481673527	1.2888155783166	0.249151610991973	0.791636782778058	-4.75134589640799
Q8TCU6-1	PREX1	0.0812026602303944	3.38025552629682	1.82428995256772	0.122531900169669	0.733441736359969	-4.75194285094892
Q92609-2	TBC1D5	0.0773691174972691	3.29672356869012	2.15671414211614	0.0786968492311151	0.695366842612303	-4.75196498425914
Q96ND0	FAM210A	-0.211748049041164	3.439839443755	-1.43665586839539	0.205318011704702	0.776986386711222	-4.75204865013756
Q13163-3	MAP2K5	0.115786958198578	3.2782925346084	1.53603467264327	0.18001634954385	0.7641205515961	-4.75224640644981
Q8NHQ1-1	CEP70	-0.11085874388068	3.37854913242802	-0.362978033993364	0.730196550164994	0.935302229358609	-4.75233708821946
A4D1P6-1	WDR91	0.0734593307970672	3.2170514058137	1.94452225690298	0.104345660128619	0.722811621274888	-4.75243906832476
P00492	HPRT1	0.0750392735792671	3.17418283356102	2.07245762669356	0.0879976723799151	0.697991490104712	-4.75259548811154
P47972	NPTX2	-0.1106170008463	3.38018388107467	-1.36808652020579	0.224680962479933	0.783167807426645	-4.75261398834188
Q12774-1	ARHGEF5	-0.0675898818040544	3.40811191912726	-1.77417113769456	0.131026078947114	0.734995534891536	-4.7539860051004
Q16566	CAMK4	0.147253491384033	3.12176529128542	1.81993958492985	0.123246821911499	0.733441736359969	-4.75424391061255
P36896-4	ACVR1B	-0.152211616280315	3.38897613726398	-0.858594049967134	0.426490851004171	0.856417166883696	-4.7553349819549
Q8IXS6-2	PALM2	-0.108188969071575	3.38234733903762	-1.48821530524378	0.191798322629812	0.76773129536073	-4.75553880120528
Q96BJ8-3	ELMO3	-0.0877726196309369	3.40911261764347	-1.47450653267519	0.19530868179388	0.768988450927102	-4.75859920669812
O15381-1	NVL	-0.0452761177089494	3.29499493991762	-2.40245185740648	0.0570074277687774	0.667644697400095	-4.75884014811658
P26038	MSN	0.10655264475469	3.33589055736227	2.51333200976711	0.0493898996180669	0.656640918778751	-4.75894138285269
P36897-2	TGFBR1	-0.100565154988774	3.35489482174583	-1.69333515073209	0.145977582550507	0.749139109615353	-4.75895042446872
Q8TDP1	RNASEH2C	0.10687635435973	3.37292282057879	1.34358398422117	0.231999749553967	0.786410005484476	-4.76070222525502
Q9GZZ9-1	UBA5	0.0685165367339598	3.20901376595539	1.94180309606071	0.104725063186682	0.722811621274888	-4.76106189716982
P61970	NUTF2	0.15583256266345	3.25378554600633	2.0356302153309	0.0924139037571684	0.709709178803799	-4.76239399730926
Q00005-7	PPP2R2B	0.132408776946107	3.39281463069526	0.575527024139018	0.587749404411986	0.905251209196342	-4.76246842522119
Q9H2J7	SLC6A15	-0.218555290429381	2.8267021930637	-1.13044267116567	0.305291046147361	0.806321739619344	-4.76338633579658
P20674	COX5A	0.083333085974881	3.33958662598297	1.89066315871057	0.112127912582973	0.726290966137758	-4.7634810934556
Q9NVQ4-2	FAIM	0.106465255437042	3.08582751007638	1.64513411881315	0.155680619975409	0.749139109615353	-4.76366782656943
Q9Y4K0	LOXL2	-0.102296682550509	3.38298121769275	-1.8813020066459	0.113539441388186	0.727089788587402	-4.7659181797138
Q00839	HNRNPU	-0.181527141573984	3.33369139955837	-1.56782279828371	0.172570330985957	0.756873951976266	-4.76610056679484
Q63ZY3-1	KANK2	-0.0641778204198712	3.32710801336316	-1.82010427203647	0.123219681831082	0.733441736359969	-4.76614260492727
P63208	SKP1	0.0994723428430552	3.34119541783084	2.11313576111403	0.0833725423313445	0.696474886497503	-4.76641055076125
O95486-1	SEC24A	0.0589349630939052	3.32048480020085	1.99290238010579	0.0978250149103597	0.714774775611695	-4.7666704737853
Q02040-1	AKAP17A	-0.0412070574754036	3.33720424436595	-2.28444511484699	0.0665069114005445	0.667644697400095	-4.76670917131419
Q8N4P3	HDDC3	0.10886332344314	2.7819901725286	1.2120495134851	0.275112065320277	0.799305333873119	-4.76694082860839
Q9ULC3	RAB23	-0.126800507216368	3.27547417758403	-1.79878440246464	0.126783435970384	0.733441736359969	-4.76732009699788
Q96DC7-2	TMCO6	0.164405437632511	3.39985528534155	1.30473190794844	0.244052242914776	0.789594391611883	-4.76801188714213
Q8NFH8-1	REPS2	-0.123597052807877	3.42833094407539	-1.14663521146461	0.299084964128818	0.806321739619344	-4.76911636793212
Q8N2G8-1	GHDC	-0.183196159358311	3.06618145219367	-1.29548316422744	0.247003814858689	0.791015351126171	-4.76928853879998
Q8IZC7	ZNF101	0.161418886628444	3.39725773451058	1.4626962296466	0.198381465157993	0.768988450927102	-4.77007544404191
Q13303-3	KCNAB2	0.15912568593111	1.80154841779037	1.56550255098974	0.173103661388954	0.756873951976266	-4.77056009421352
P07996	THBS1	-0.110169834601696	3.26389962986588	-1.71948324369011	0.140965186914048	0.744036505653461	-4.7708968938524
Q9BV36	MLPH	-0.114822974023699	3.44562747220363	-1.12132331497538	0.308834514244104	0.807330405485056	-4.77168757467646
Q8WWQ0	PHIP	-0.0811784863231404	3.35021519034318	-2.38949368032744	0.0579763363222664	0.667644697400095	-4.77347627712464
Q5VUA4	ZNF318	-0.0542865227916038	3.30482208797705	-2.42238442251151	0.0555505410365205	0.667644697400095	-4.77423696288711
Q92572	AP3S1	-0.102410726403205	3.2839808907515	-1.79047988197463	0.128199344168238	0.733441736359969	-4.77470811649697
O43909	EXTL3	-0.0785183176369393	3.34718701584588	-1.92919051463627	0.106503354636907	0.722811621274888	-4.77523568614194
O43639	NCK2	0.0639201489970382	3.33296714913182	2.15889839347989	0.0784698056418483	0.695366842612303	-4.77529842816339
Q7KYR7	BTN2A1	-0.137061127786378	3.27822187439364	-1.16675081357372	0.291526890093743	0.805261228584964	-4.77537308033942
Q7Z6I8-1	C5orf24	-0.121832809934378	3.07285646205405	-1.33649919622754	0.23415628217727	0.787448824294213	-4.77824144778695
Q9UHL0-1	DDX25	-0.0722327992890237	3.23945390689667	-0.272405966836547	0.795272356348781	0.953492603889688	-4.77872297738644
Q9NRF8	CTPS2	0.0734472215969781	3.4368162109294	2.33984069193681	0.0618541232107206	0.667644697400095	-4.77878922066425
P35052	GPC1	-0.0906886040195452	3.32320791840267	-1.84685971767397	0.118889207949091	0.733441736359969	-4.78073415993171
P57729	RAB38	-0.09553091511508	3.44077929111139	-1.48681896505586	0.192153130056742	0.76773129536073	-4.78117067542093
Q13615	MTMR3	0.0979519410775131	3.31262473158129	1.87801054297544	0.114040008254752	0.727089788587402	-4.78133037214658
Q96I15-1	SCLY	0.0761519599361613	3.26751931523251	1.88951384089664	0.112300252338659	0.726448175330686	-4.78138994231264
Q2TAA5	ALG11	-0.138825355436549	3.33276741307374	-1.36159741729254	0.226598300204023	0.784100603281352	-4.78178345243541
P14174	MIF	0.0667174491192868	3.15708486197417	2.03062052856508	0.0930320756766934	0.71036960377837	-4.78188551386642
Q8WZ73-1	RFFL	0.104388048718456	3.32256218416692	1.22775009077822	0.269615068020946	0.797499349267995	-4.78431658445277
Q8NI35	INADL; PATJ	-0.0511144297792553	3.31918521112254	-2.02704487794399	0.093475897223761	0.71036960377837	-4.78437028252765
Q9UIW2	PLXNA1	-0.126191863616337	3.29036663494924	-2.07599500002799	0.0875851198119641	0.697991490104712	-4.78437631236552
Q8N8A2	ANKRD44	-0.0904609172164787	2.42429770324394	-1.55899428106692	0.174608120385343	0.758546715513223	-4.78516330426864
Q9H0X9	OSBPL5	-0.144034460931129	3.3328305047836	-1.37921134444218	0.221428636054655	0.781317205082192	-4.78535026454074
Q96HS1-1	PGAM5	-0.0824654359554016	3.33685541855774	-2.02969168014163	0.0931471584081246	0.71036960377837	-4.78579327828238
Q09161	NCBP1	-0.0469481859401891	3.32279695515707	-2.38879214847131	0.058029288755823	0.667644697400095	-4.78599020924442
Q96NY9	MUS81	0.154572426747542	3.27595676804174	0.863113868105786	0.424205735903199	0.85569713221806	-4.78625979797727
Q9BXP2-1	SLC12A9	-0.0866108529892638	3.31833551767417	-1.66072042697088	0.15247587684347	0.749139109615353	-4.78798042020779
O94776	MTA2	-0.078700517210973	3.24313429569385	-2.27698970158123	0.067160789190011	0.670319082008035	-4.78802609865149
O95870-1	ABHD16A	-0.228862160372575	3.3141338902856	-1.91481898415736	0.108567142602463	0.724373469675889	-4.78811503536814
Q96IR7	HPDL	-0.142286660112236	3.27244759155744	-1.50988197940891	0.18637184522599	0.7641205515961	-4.78843063768036
Q9NPH3-5	IL1RAP	0.104604373088929	3.26564068846797	0.483441729583985	0.647471875018181	0.917568345814532	-4.78852722236368
Q96A19	CCDC102A	0.128485215313506	3.15411604156726	0.923593413231665	0.394518833883862	0.841029022992305	-4.7887435941173
O75570	MTRF1	-0.15886821647947	3.30424672237979	-1.33806614046225	0.233677749890287	0.787448824294213	-4.789391108038
Q9BWT6	MND1	0.118503417529048	3.40218895943899	1.67175223839786	0.150246703861917	0.749139109615353	-4.78988649672978
Q9NWY4	C4orf27; HPF1	0.093848049726811	3.29663133991483	1.83238921354147	0.121211973017787	0.733441736359969	-4.79037316477385
O60573	EIF4E2	-0.0849963364491045	3.37939642701209	-1.90338114948383	0.110238650280657	0.725032462556748	-4.79108757293666
Q9BUT1-1	BDH2	0.0601873551332467	3.38139423054971	1.89134320194483	0.112026066519417	0.726290966137758	-4.79287030742319
Q96KG7-1	MEGF10	0.0742946362057329	3.35976836390919	1.75554754857215	0.134330068330124	0.734995534891536	-4.79309483117642
P29350-3	PTPN6	0.0648466997145739	2.62687278056699	2.08746300085471	0.0862613542316	0.697991490104712	-4.79324485641159
Q9BVG9	PTDSS2	-0.129608555142338	3.29463589568785	-1.29814776377247	0.246150164301241	0.791015351126171	-4.79331570582217
Q9UC07-1	ZNF69	0.164971027506675	3.42327304131233	1.10987704850265	0.31333172730249	0.808751523347249	-4.79377057818549
Q14449	GRB14	0.13448605114658	3.2882929343237	0.73036682205879	0.495166103306078	0.878996884378154	-4.79401984370595
P31939	ATIC	0.0709879446206374	3.32586677565124	2.62376839704486	0.0428779831499414	0.656640918778751	-4.7949861142239
P62312	LSM6	-0.102434121057546	3.31692820018648	-1.79555932934245	0.127331439889464	0.733441736359969	-4.79536776756564
P18859-2	ATP5J	-0.266569248972536	3.39861120855387	-1.86673657005148	0.115771525064338	0.732223559156751	-4.79550793206891
Q6UWZ7	FAM175A; ABRAXAS1	0.112511879079779	3.34731225684702	1.8851165817817	0.112962099252142	0.727089788587402	-4.79607248442462
Q8WY54	PPM1E	0.0555635234972855	3.2469294249162	1.87124681293524	0.115075652791302	0.730240205305933	-4.79788076526727
P60468	SEC61B	-0.184470561381084	3.30974832115779	-1.50748554253187	0.186964788993896	0.764194918040046	-4.79835390077384
Q9UPX8-3	SHANK2	-0.041838734253926	3.41109856189687	-2.35376238236019	0.0607398467222257	0.667644697400095	-4.79920703997634
Q96B36-3	AKT1S1	0.183710369218294	3.29142290251775	1.54372041812159	0.178188310463844	0.76407575878132	-4.79993775040262
Q05086	UBE3A	0.0751349406189444	3.36388414239165	2.19984334061162	0.0743380385337279	0.692137659746068	-4.80064430190573
Q16585	SGCB	-0.071333400674341	3.35580718263402	-0.31212823319947	0.766465798995057	0.945572857137706	-4.80093193180754
P49069	CAMLG	-0.129887992052109	3.31545566444805	-1.60907050939866	0.163349594337801	0.751123342519793	-4.80132837645046
Q96RD7-1	PANX1	-0.147021978124443	3.24702855165033	-1.64037976828626	0.156671203576695	0.749139109615353	-4.80198528727227
Q16637	SMN1; SMN2	0.0997731947815395	3.33908774461567	1.84031856761419	0.119933577635653	0.733441736359969	-4.80207893348604
P52741-1	ZNF134	-0.103841227507578	3.34337323098588	-1.23876858206891	0.265815558264913	0.797304002637856	-4.80233284537803
P18440	NAT1	0.103065197544828	3.29117915327177	1.36369172460021	0.225977855977856	0.784100603281352	-4.80243348599025
P18031	PTPN1	-0.135674636024232	3.30489535878807	-2.106629296126	0.0840950495341266	0.697991490104712	-4.8037653456019
Q9NZK5	CECR1; ADA2	0.265282059442028	3.04332223718773	1.3475267460709	0.230807497685673	0.78497442161603	-4.80418461325859
P06454-1	PTMA	0.29520385653543	3.37765101335525	2.22266523307199	0.0721345100976982	0.690707585170939	-4.80489672288312
Q13243-1	SRSF5	0.131845248954286	3.36592869490978	1.93190068499529	0.106118662083482	0.722811621274888	-4.80550279861842
Q86UT6	NLRX1	-0.126151971149167	3.29025985746931	-1.45085101733504	0.201509014368733	0.769729154961056	-4.80597612873862
Q96FS4	SIPA1	-0.0619535665552061	3.34910390366654	-1.99003996592074	0.098198944095493	0.716105600093805	-4.80629602708594
P13682	ZNF35	-0.107577011166143	3.30815190796878	-1.59130126400584	0.167261911827759	0.751864550913203	-4.80765258792391
Q9NRN7	AASDHPPT	0.0947161381477544	3.21403420054422	2.06792050262238	0.0885297667402814	0.697991490104712	-4.80927101575268
Q8IWU5-1	SULF2	-0.132340544848493	2.89984376756919	-1.35434525534458	0.228758885520397	0.784100603281352	-4.81076230242695
Q96T68-1	SETDB2	-0.121177013580942	3.30415858844146	-0.711353193243598	0.505976599092216	0.880638037258503	-4.81081382463455
Q92667	AKAP1	-0.0863145581114222	3.32321056661651	-2.33261095331425	0.0624413113797898	0.667644697400095	-4.81254213840261
O43847-2	NRD1; NRDC	0.0753900327995867	3.38591377517976	2.3796406459287	0.0587247859122057	0.667644697400095	-4.81278208679034
Q6IMN6-1	CAPRIN2	-0.0971128819158792	3.36254411394717	-1.34393352948018	0.231893823322921	0.786410005484476	-4.81325307238791
Q9HCM4	EPB41L5	-0.0737052441545738	3.2900084186243	-1.62639150298263	0.159621468457716	0.751123342519793	-4.81329073281383
Q92619-2	HMHA1; ARHGAP45	0.162047625549127	1.78682653059214	1.66692128258367	0.151218926570002	0.749139109615353	-4.81595594795156
Q9ULR5	PAIP2B	0.0986452010695561	3.40822188790486	1.59253126876439	0.166988201068339	0.751864550913203	-4.81644952690637
Q5QP82	DCAF10	0.108620006028696	3.29148775761339	1.2795030968934	0.252179555178649	0.793089229288316	-4.81654713525921
O94903	PROSC; PLPBP	0.0478390571761317	3.28619268684169	2.02726122853379	0.0934489812249764	0.71036960377837	-4.81902613309215
O15027-5	SEC16A	-0.11530344629341	3.21785290710851	-0.947308891355829	0.383328721026714	0.834534037377114	-4.81908947069061
Q92871	PMM1	0.114557020709481	3.33055944951831	1.67467164798648	0.149662150772638	0.749139109615353	-4.819884718039
Q9NWF9-1	RNF216	0.0977628304384492	3.33975958696189	1.50302756560202	0.188072588203378	0.764649123845424	-4.82077580347011
Q13952-1	NFYC	0.0718678396599103	3.40896010670878	1.95250277657973	0.103240216268921	0.722811621274888	-4.82156376500461
P41440	SLC19A1	-0.108051343173847	3.30604467029366	-1.41443300612692	0.211416609198766	0.77771670566293	-4.82169292028321
Q9UBX3-2	SLC25A10	-0.165550197583517	3.03836093072695	-1.40234834147068	0.214803440414354	0.778691920506784	-4.82411983516401
Q96BN2	TADA1	-0.0700797362409824	3.30270127537243	-1.8070535296652	0.125389103691645	0.733441736359969	-4.82584533589701
A6NDB9	PALM3	-0.108273005136996	3.38724527628808	-1.92075461724516	0.107709886452635	0.723312031470335	-4.82605749229735
P56211	ARPP19	0.117822917609644	3.44569682953027	1.74567979637209	0.136114133613304	0.734995534891536	-4.82644405970367
Q9H4H8	FAM83D	-0.058391427425369	3.39923259099143	-2.07198546430222	0.0880528910393211	0.697991490104712	-4.82689449746782
O43808	SLC25A17	-0.194122246779618	3.2229373061164	-1.21788201594634	0.273058587012528	0.799305333873119	-4.8275745531074
Q9NYQ6-1	CELSR1	0.109294233771927	3.32550654094167	0.587517373053279	0.580218830698057	0.901648545496353	-4.82780261934287
P17014-1	ZNF12	0.112631678673492	3.3348019081812	1.23851787136251	0.265901480219659	0.797304002637856	-4.83009964128057
P46109	CRKL	0.0784826079901119	3.31892920069848	2.14894567243375	0.0795099150673912	0.695366842612303	-4.83071127067258
P48147	PREP	0.0615868011856215	3.36433591821824	2.39921833890764	0.0572475797101057	0.667644697400095	-4.83189539734944
O14531	DPYSL4	0.0745770722460711	3.29827201206698	2.16703728202654	0.0776298033428202	0.695366842612303	-4.83291513848282
P28070	PSMB4	0.070910781653696	3.34013846669009	2.14393563760598	0.0800389170280124	0.695366842612303	-4.83304714523704
Q9P2F8-1	SIPA1L2	-0.0877415212336891	3.36019248583195	-0.292013706950831	0.781004193643598	0.948911633900775	-4.83401374772648
Q9P016	THYN1	0.153785649058304	3.41955114672313	2.13770572415919	0.0807018426925945	0.695366842612303	-4.83436022800993
Q9BT67	NDFIP1	-0.133583074432481	3.33708113025179	-1.34879943092364	0.230423849734348	0.78497442161603	-4.83483904422542
Q9ULJ3	ZBTB21; ZNF295	-0.0606544516706866	3.25508365555149	-1.81253619082231	0.124473097703852	0.733441736359969	-4.83548942721692
O43439-5	CBFA2T2	-0.0667437701385568	3.35489341614676	-1.74712116329556	0.135852078187253	0.734995534891536	-4.83616071649178
P09326	CD48	0.291277508788726	1.30406351731414	1.78461658158011	0.129208532534819	0.734831624616109	-4.83809391149008
Q6P1K2	PMF1; PMF1-BGLAP	0.11265880139322	3.20406857912209	1.83063788262745	0.121496169842026	0.733441736359969	-4.84008428016794
P33908	MAN1A1	0.167271007981727	2.39772164304186	0.970358162986543	0.37269495401888	0.831691273494799	-4.84021470299393
Q8TBP6	SLC25A40	-0.140542742392994	3.11327244666616	-0.863100495043704	0.424212483353039	0.85569713221806	-4.84062130184162
O94941-1	UBOX5	-0.131491955822614	3.29587671159326	-1.30598121061008	0.24365600551151	0.789594391611883	-4.84074062935914
Q9P2Y4	ZNF219	-0.0847409075317644	3.36741382924442	-1.97182396617574	0.10061313615976	0.716454048997822	-4.84083383108888
O75792	RNASEH2A	0.0663456277385872	3.32142757077741	1.86232425845257	0.11645639891526	0.732939698505229	-4.8417360693212
P56199	ITGA1	-0.107316460374998	3.23381175792505	-1.68271544671388	0.148063063996476	0.749139109615353	-4.84184845276099
P52701	MSH6	0.04368242516957	3.42222953243125	2.63239531206991	0.042409790682864	0.656640918778751	-4.84205499395048
O95625	ZBTB11	-0.0694549627934075	3.24665403387972	-1.67497392386534	0.1496017537112	0.749139109615353	-4.84217145436079
P53794	SLC5A3	-0.116355631477734	3.28193578314311	-0.825470755453485	0.4435198073606	0.862530788864519	-4.84272982903466
Q9H1X3	DNAJC25; DNAJC25-GNG10	-0.191329613234094	3.31932581818994	-1.42159778328916	0.209432159983044	0.77771670566293	-4.84502985633946
O14967	CLGN	-0.127169688561484	2.99805196786827	-1.53789483690134	0.179572274058014	0.7641205515961	-4.8451095856298
Q68CQ4	DIEXF	-0.0567553325064057	3.29919876447592	-2.16466915316065	0.077873241814551	0.695366842612303	-4.84575198980378
Q9H147	DNTTIP1	-0.0809550530620105	3.3219151790389	-1.63458021341913	0.157887883970512	0.749139109615353	-4.84720206478347
Q7Z2T5-1	TRMT1L	0.0514315303139465	3.29360927808688	2.28304571551792	0.0666291320829812	0.667644697400095	-4.84738880139111
P28065	PSMB9	0.112395738134855	1.98426986458927	1.1692146322147	0.290612616914557	0.804916184832217	-4.84771080975664
Q9H204	MED28	0.0763537431039416	3.33402626673445	1.51219612365341	0.185800960964164	0.7641205515961	-4.84903867209067
Q96AE4	FUBP1	0.0786347889874698	3.38262155987869	1.52864020628372	0.181792028537553	0.7641205515961	-4.85012907128795
Q15102	PAFAH1B3	0.11244680872749	3.3375710508955	1.93830987625404	0.105214534514322	0.722811621274888	-4.85085324532505
Q8N8R3-1	SLC25A29	-0.138947798635464	3.37627980411587	-1.22602763665281	0.270213348834732	0.797897767884247	-4.85179320996357
Q8NFU5	IPMK	0.107728286414869	3.39630583806679	0.938093517987785	0.387646917230671	0.838699139592134	-4.85321894035625
Q92599-1	SEPT8	0.316443272139951	3.31928457198226	1.87946979145277	0.113817810456837	0.727089788587402	-4.85332429225262
Q99627-1	COPS8	0.111062922833675	3.26517378808285	1.82852202937785	0.121840412559031	0.733441736359969	-4.85333172452856
P51570-2	GALK1	0.0827680673098612	3.19817539251995	1.64316245117945	0.156090679088155	0.749139109615353	-4.85405915268953
A5PLN9-4	C5orf44; TRAPPC13	-0.08681994471542	3.31475538619265	-1.7970428267485	0.127079070686129	0.733441736359969	-4.85417061602242
Q96PK6-5	RBM14-RBM4; RBM14	0.0733632235027398	3.34275698260377	1.62240751007637	0.160471581173572	0.751123342519793	-4.85437993592905
Q9ULK2-1	ATXN7L1	0.204857905301523	3.38075551765244	1.24330355818182	0.2642656117747	0.797304002637856	-4.85442460256574
P19532	TFE3	0.150718468171538	3.37054960345733	1.60613815193173	0.163989057537877	0.751123342519793	-4.85477215773602
O43463-2	SUV39H1	-0.144161003659206	3.37533573761675	-1.80758355090106	0.125300257292682	0.733441736359969	-4.85546690087635
Q8IX15-3	HOMEZ	0.0721246166567364	3.28982663194947	1.53302115672102	0.180737993337221	0.7641205515961	-4.85554853773488
Q15746-1	MYLK	-0.0511760747707453	3.36338202408267	-2.07556148496531	0.0876355715204411	0.697991490104712	-4.85575281037117
O00629	KPNA4	-0.0626105229075983	3.31512321383009	-2.08728457249277	0.0862817909840747	0.697991490104712	-4.85700753378201
Q13641	TPBG	-0.185833634195946	3.32088993107605	-1.45025854975701	0.201666657033641	0.769729154961056	-4.85781031398553
Q9H0M0-1	WWP1	-0.0755064211819199	3.3457698353463	-1.5176192630791	0.184469622365115	0.7641205515961	-4.85823656602395
O00214-2	LGALS8	-0.0948824804184671	3.40044381563162	-1.35432980976271	0.228763507225261	0.784100603281352	-4.85875758967333
Q9Y394	DHRS7	-0.137626755903079	3.27797481655386	-1.78642631735318	0.12889619825216	0.734831624616109	-4.85968096637247
Q8WUA7	TBC1D22A	0.064089839218368	3.28911227528478	1.63474395632888	0.157853406583792	0.749139109615353	-4.85972960552901
Q9NRG9-1	AAAS	-0.103463852349743	3.33118651523614	-2.06597691365834	0.0887587191565433	0.697991490104712	-4.85994880553601
Q5SQI0-1	ATAT1	0.0734239330518422	3.32690474340262	1.60710041125004	0.163778949239447	0.751123342519793	-4.86016791265599
Q9UPQ9	TNRC6B	-0.0611331990488657	3.32954741309918	-2.28277825410312	0.0666525185734485	0.667644697400095	-4.86062922469237
Q8IXQ6-2	PARP9	0.120810185106331	3.41244813126245	1.37213023122061	0.223493729523102	0.782463362833446	-4.86237106822535
Q92747	ARPC1A	0.0663307469554857	3.3533624205538	2.04354164854812	0.0914462759878015	0.706521479736569	-4.86297231473146
A5PLL7	TMEM189; TMEM189-UBE2V1	-0.141454631786295	3.32404842142981	-1.28643991483047	0.249920930027611	0.791792493802863	-4.86298515015834
Q17RY0-1	CPEB4	0.0821825936183329	3.13746986008089	1.7545029696729	0.134517821012067	0.734995534891536	-4.86432013533989
Q6ZSY5	PPP1R3F	0.0757416508187944	3.36934372144231	0.368714054649281	0.726151651132325	0.935302229358609	-4.86512308705476
Q9ULI2-1	RIMKLB	0.102108069279221	3.37031338245187	1.243092212325	0.264337665934022	0.797304002637856	-4.86513999973901
Q504Q3	PAN2	-0.0614341083964923	3.30154656746923	-1.75314119075284	0.134762978851399	0.734995534891536	-4.86540578688167
Q9H0N5	PCBD2	0.07542176834771	3.31919487647684	1.47815653314491	0.194368152268529	0.767864296706566	-4.86560578307898
Q7L945	ZNF627	0.0892166950456741	3.36515027489331	1.47029377651857	0.196399562828476	0.768988450927102	-4.86634867603502
A1XBS5	FAM92A1; FAM92A	-0.0763538930232674	3.30276885092352	-1.55026464800159	0.176645805976186	0.760082234127483	-4.86726902248776
A4D1S0-1	KLRG2	-0.0807769059141621	3.28336337211206	-1.4738027228458	0.195490532550658	0.768988450927102	-4.87003994510433
O60333-2	KIF1B	0.0762844025558018	3.30306877355899	1.8909163260698	0.112089986248412	0.726290966137758	-4.87009152955797
Q8NCR0-1	B3GALNT2	-0.110249108089027	3.30090563881161	-1.24060588110801	0.265186642933255	0.797304002637856	-4.87010682502136
Q9NYP3-1	DONSON	0.146834414304293	3.37391135967011	1.6103937910425	0.163061816987351	0.751123342519793	-4.87147976564402
Q9HCI6	KIAA1586	-0.0756338378395136	3.34169859168681	-1.5181200339579	0.18434714631216	0.7641205515961	-4.87190043825856
P0DJD1	RGPD2	-0.0621637450624464	3.39577509539889	-1.68519889562739	0.147572759475061	0.749139109615353	-4.87298563178531
Q14201-2	BTG3	0.114373689220067	3.26868508052721	0.780513502729996	0.467426959172605	0.87254504861763	-4.87415436647699
Q3SXM5	HSDL1	-0.150028418000446	3.31855685571556	-1.52867987301579	0.18178245862772	0.7641205515961	-4.87429906343692
Q96K83	ZNF521	-0.0883318680988631	3.34631785734238	-1.39024866161924	0.218244893745159	0.779937206141629	-4.87442476330215
Q53R41	FASTKD1	-0.110415706299634	3.30248593068589	-1.54033758972985	0.178990709414242	0.7641205515961	-4.87455463085181
Q99574	SERPINI1	0.133223266802847	3.23345607899137	0.919055561714093	0.396688889515798	0.841029022992305	-4.87496214964112
O94880	PHF14	-0.0730715662198724	3.30710756041276	-1.66071877965799	0.152476212118939	0.749139109615353	-4.87602195747177
Q13470-2	TNK1	-0.0722665713313688	3.42206823193404	-1.5162457603804	0.184805944878014	0.7641205515961	-4.87681207099173
O43760-2	SYNGR2	0.0934405103524735	2.74490626758607	1.17366591926918	0.288967143155327	0.804294176947412	-4.87692576332401
Q08AN1	ZNF616	-0.0820422473944808	3.33558168480518	-1.43156985274525	0.206699081553477	0.776986386711222	-4.87734045791196
Q15459	SF3A1	0.0717823765111151	3.3427962680696	2.50689362387274	0.0498010159110783	0.657613414922191	-4.87779884505752
P61088	UBE2N	0.12566138433586	3.34546620882761	2.01326053433132	0.0952073437019775	0.712000315531558	-4.87791797527592
Q6NS38-1	ALKBH2	0.0846294031139054	3.28490686679002	1.6699856528627	0.150601513862067	0.749139109615353	-4.87803688816568
Q9HB21-1	PLEKHA1	-0.0884770932387482	3.28544966303094	-1.68408464141817	0.147792547787076	0.749139109615353	-4.88128746192947
P11172	UMPS	0.070492816130088	3.35340608282753	2.26105358010006	0.0685812962109459	0.676483378152322	-4.88149599590195
P78317	RNF4	0.117501119132969	3.39629546040965	1.00939371033797	0.355226390078988	0.827081067945794	-4.88160443560223
P43307	SSR1	-0.275740558307232	3.2115360854666	-1.65313707305518	0.154026972730475	0.749139109615353	-4.88194615992332
Q9H0F6-1	SHARPIN	0.0864232478532903	3.32384352761348	1.22917043073219	0.269122606097813	0.797492713009818	-4.8830109733651
P52756	RBM5	-0.0479027148963155	3.29539541246788	-2.00403298510302	0.0963848036864974	0.714774775611695	-4.88352054074306
Q562F6	SGOL2; SGO2	-0.0734445236780855	3.34962925454647	-2.12962407404673	0.0815703394967387	0.695775512805027	-4.88479750595267
O43852-3	CALU	-0.110437793365637	3.30105614169325	-1.71108004527841	0.142557217069075	0.746216820177361	-4.88492073806539
O14950	MYL12B; MYL12A	0.151791422622941	3.33172285143288	1.85856971000547	0.117042394177087	0.733263163684083	-4.88540553800998
Q9UKL0	RCOR1	0.0930988540376948	3.27848684188503	1.78388784454656	0.129334515280698	0.734995534891536	-4.88570361092481
Q86W34-4	AMZ2	0.072941409724653	3.2406792261816	1.50796103714293	0.186846996193207	0.7641205515961	-4.88661033250966
O75054-2	IGSF3	-0.0982650005271606	3.2430165706493	-1.55934791995687	0.174526050940157	0.758546715513223	-4.88751772372096
Q9NWZ5-1	UCKL1	0.110246251642883	3.37031534422551	1.81771586295178	0.123613874164804	0.733441736359969	-4.88940279966426
Q9UL41-1	PNMA3	-0.0855727295496348	3.40835366598204	-1.48771851707777	0.191924484427779	0.76773129536073	-4.88999096903337
P49841-2	GSK3B	0.0657749076060466	3.34296753404357	1.89848691965821	0.11096184066828	0.725745304012826	-4.8912981181456
B2RTY4-4	MYO9A	-0.0886875537679745	3.26520010593383	-1.45832474378757	0.199530336209072	0.769729154961056	-4.89158296472926
Q6ZRQ5	MMS22L	0.071496987646036	3.27809989391621	1.8591700216536	0.116948500502243	0.733263163684083	-4.89186511175621
O75128-2	COBL	-0.0700944879652839	3.36826832870968	-1.80476606395774	0.125773271140745	0.733441736359969	-4.89236783816065
Q96Q42-1	ALS2	0.0517592269615591	3.37565620329053	1.92802222161261	0.106669624379146	0.722811621274888	-4.89265737396022
P47813	EIF1AX; LOC101060318; LOC107984923	0.0991829472396016	3.3391978465452	1.99521819371345	0.0975235590291603	0.714774775611695	-4.89303923919105
Q86T03-2	TMEM55B; PIP4P1	-0.0825889030093555	3.2455700740065	-1.51953440055716	0.18400164592927	0.7641205515961	-4.89329540621018
Q9H329-2	EPB41L4B	-0.0632818653558481	3.38333222236297	-1.77332319366972	0.131174738290368	0.734995534891536	-4.89386615453607
P28066-1	PSMA5	0.0386021182987192	3.33257413358004	2.35343006417943	0.0607661956599484	0.667644697400095	-4.89489425290552
Q9HCG7	GBA2	-0.0622140298081411	3.32229925655063	-1.67367509993247	0.149861438274552	0.749139109615353	-4.89556653088594
P29590	PML	-0.116587300141425	3.30581096258004	-0.888872925458614	0.41135929671179	0.853189652439269	-4.89662570936129
Q9P0R6	GSKIP	-0.133678128703656	3.3702798219197	-1.11780617637227	0.310210502846216	0.80859849807806	-4.89670796017651
O43819	SCO2	-0.175024271531852	3.02851471801333	-1.24965898854198	0.262107000270503	0.797304002637856	-4.89697679413702
O95628-10	CNOT4	0.0554039940110814	3.33929417401054	1.81651149170742	0.123813127715941	0.733441736359969	-4.89715456439294
Q9UKV3-5	ACIN1	-0.0724396413583118	3.35679702182507	-1.45651019775219	0.200009053511151	0.769729154961056	-4.8975279172999
Q9Y6B7	AP4B1	-0.0715937516115319	3.33920820426712	-1.61436868909706	0.162200340984672	0.751123342519793	-4.89805132396423
O00559-2	EBAG9	-0.086127529114243	3.25553018200404	-1.25720182298147	0.259565482807505	0.794681425486348	-4.89821819632797
P24666-1	ACP1	0.304497894958314	3.40975937755791	1.46200988432582	0.198561430691999	0.768988450927102	-4.8987666970637
Q96AZ6-1	ISG20	0.468762094256854	1.43156024057678	1.52305131638956	0.183145210299364	0.7641205515961	-4.89954025115387
P46976-1	GYG1	0.0774321159331826	2.93225800265989	1.72512143810007	0.139906862861204	0.741298507691405	-4.90074113754725
P11245	NAT2	0.13293705740461	3.48202210741636	1.19857564069323	0.279907895013774	0.799305333873119	-4.90168642345132
Q9H9V9	JMJD4	0.0964684724395937	2.9579028120524	1.30782214177837	0.243073184793628	0.789594391611883	-4.90203066329757
Q6ZN28	MACC1	-0.0988295420250829	3.34601009151235	-0.944886368375774	0.384460184194443	0.835574655280386	-4.90250674900012
Q9Y3A4	RRP7A	-0.0822511626135955	3.35238375806136	-2.07540593365841	0.0876536816330443	0.697991490104712	-4.90258463331212
Q8TE04-1	PANK1	0.0753011184457005	3.44250546911139	1.41510073327373	0.211230929183967	0.77771670566293	-4.90260189351097
Q68CZ2-1	TNS3	0.0765815725064405	3.06749836311834	2.01279968134764	0.0952657977104842	0.712000315531558	-4.90302201548322
Q15697-1	ZNF174	-0.027278382437727	3.34284884874034	-0.14658368980501	0.888698704581087	0.978153227738383	-4.90399776297004
Q9NTX7	RNF146	-0.137506714567521	3.23329022585762	-1.16682943985553	0.291497674985035	0.805261228584964	-4.90613051277129
O00541-1	PES1	-0.0907465983726035	3.3313064641835	-1.27874383555883	0.252427881434551	0.793089229288316	-4.90780241238898
Q03393	PTS	0.0967820494666109	3.33792923223418	1.26181260393355	0.258022758870457	0.79390101232215	-4.9079246162155
Q9H5N1	RABEP2	-0.0755222115266252	3.26616526748004	-1.74499161090235	0.136239429727844	0.734995534891536	-4.90817942513448
Q5JS13-1	RALGPS1	-0.017579091888071	3.20504925767631	-0.0823399678593396	0.937298322821362	0.984118343052619	-4.90995713019358
Q8IY33-1	MICALL2	-0.0927585301549592	3.31050657772599	-1.00131883750316	0.358784449617802	0.828055342855716	-4.91223545888514
O95163	IKBKAP; ELP1	0.0487372597026392	3.33204586605985	2.38240487418441	0.058513780262459	0.667644697400095	-4.91277382926871
P46940	IQGAP1	0.0615849838656066	3.31852272867992	2.57000865579881	0.0459242551658325	0.656640918778751	-4.91338583891012
Q7Z7A1	CNTRL	-0.0949934746657735	3.23204516358091	-1.23487342398266	0.267153267793977	0.797304002637856	-4.91386767019681
Q14681	KCTD2	-0.0813725562935789	3.30941261483715	-1.27930752856984	0.252243497333936	0.793089229288316	-4.91394615702509
Q9UPT6	MAPK8IP3	-0.119288569965041	3.2466498744892	-1.21298021669073	0.274783478599168	0.799305333873119	-4.91452009817136
Q6DKJ4	NXN	0.0926667107854316	3.38472113572364	1.89233718888274	0.1118773714972	0.726290966137758	-4.91504577593066
Q9BXB1	LGR4	-0.0915961604993041	3.33936622387491	-1.39702638141946	0.216310893498184	0.779937206141629	-4.91594378486057
O14618	CCS	0.104841916874172	3.30934779775649	1.214625595813	0.274203419554491	0.799305333873119	-4.91618912581802
Q12972-1	PPP1R8	0.0919318885544242	3.27417691028736	2.01042302529016	0.0955678357992809	0.712000315531558	-4.91652214872424
Q9UL54-2	TAOK2	-0.0845845689497355	3.19413231168654	-1.18696804738006	0.284098051803358	0.800457814642867	-4.91663289832437
Q6ZU65-1	UBN2	-0.0557951464685442	3.34281263615598	-1.98520790936397	0.0988335032540768	0.716105600093805	-4.91752459709336
P23468-1	PTPRD	-0.0900508296496783	3.34457379859643	-1.64791906768438	0.155103209286679	0.749139109615353	-4.91788928262945
Q96E14	RMI2	0.0655592952805317	3.39160970416664	1.58519822718737	0.168626435102621	0.753114235459805	-4.91794880449971
Q03938	ZNF90	-0.0604756659496635	3.38155625542609	-1.77152432240383	0.131490668420482	0.734995534891536	-4.91876157835405
Q08357	SLC20A2	-0.138262807626743	3.32881133759017	-1.39399008690914	0.217175318248249	0.779937206141629	-4.9189566577823
Q9BV10	ALG12	-0.114513664954132	3.33242246241371	-0.913327699327846	0.399441290492699	0.842233632387697	-4.91958538485386
Q8NFZ8	CADM4	-0.0742729360138583	3.29485751805385	-1.52745895512369	0.182077235209583	0.7641205515961	-4.92015493064656
O14639-1	ABLIM1	-0.0947368101826714	3.2230131787443	-1.02078169865148	0.350257390667074	0.8254949786149	-4.92072793911473
O95229	ZWINT	0.0834429206362942	3.31242679028006	1.71125438855128	0.142524007164802	0.746216820177361	-4.92075034959079
O75330-3	HMMR	0.0965993120137298	3.36570961156216	2.20975472337919	0.0733725182254589	0.690707585170939	-4.92086440484498
Q92934	BAD	-0.0836376291775871	3.18322213117739	-1.33594561252278	0.234325556030199	0.787448824294213	-4.92091904155248
Q9H6S3-3	EPS8L2	0.0908767296816229	3.41699558808477	1.17208920502496	0.289549067292162	0.804294176947412	-4.92370674665749
P08174-7	CD55	-0.0801338413825829	3.26755632538113	-1.46091911150303	0.198847756803746	0.76933647836197	-4.92373341837901
Q9Y6Q9-1	NCOA3	0.143037709062361	3.26195756331556	1.84857763888352	0.118616443299132	0.733441736359969	-4.92377557193992
P35249	RFC4	0.0549624858702278	3.31458841768792	2.01934900079879	0.0944385422450409	0.711142251870726	-4.92461167615283
Q92692-1	PVRL2; NECTIN2	-0.103314601110641	3.36086607181187	-1.60102460765506	0.165109984372845	0.751123342519793	-4.92534105415975
Q8NEU8-1	APPL2	0.0738209476198043	3.2202133681795	1.63975261107236	0.156802331912505	0.749139109615353	-4.92551959893297
Q15942	ZYX	0.118693875586669	3.44499637974837	2.23172089595454	0.0712792404080669	0.689650432134548	-4.92557732931388
Q14934-2	NFATC4	-0.0796723272182903	3.2748642134318	-1.30329188470779	0.244509694117842	0.789856617544729	-4.92630604319142
Q6P6C2-2	ALKBH5	0.101059929774358	3.05072464529958	1.48075034604308	0.193702383102665	0.76773129536073	-4.92700752513179
Q96KM6	ZNF512B	-0.107706934209775	3.36703598756774	-1.35596517793565	0.228274639503664	0.784100603281352	-4.92710493237109
Q86TA1	MOB3B	0.123085260327333	3.46556863467094	1.10762640887071	0.314222517830986	0.809314939561474	-4.92713979650201
P61024	CKS1B	0.137069246248914	3.26924792624483	1.68077851897847	0.148446580008328	0.749139109615353	-4.92754615697046
Q6PK18-1	OGFOD3	-0.114942351617566	3.35571805739766	-1.02845554379237	0.346941202958818	0.825017911289336	-4.92756169467165
Q9BU02-1	THTPA	0.0912110368759364	3.15346344551972	1.27010714503263	0.255268115488481	0.793798609233573	-4.92833058636151
O95429	BAG4	0.0615356137505206	3.38076217792796	1.90526846879876	0.109961051504284	0.725032462556748	-4.92926467826129
Q15750-1	TAB1	0.0510597087953433	3.33548443477964	1.9031722235735	0.11026942409045	0.725032462556748	-4.92981661162439
Q9H4P4	RNF41	-0.112461249884398	3.31861362879235	-1.01915573233855	0.350963362612904	0.8254949786149	-4.930119731089
P14543-1	NID1	-0.141263394874536	3.34688344901609	-1.42748052613897	0.207815802616733	0.776986386711222	-4.93038476704142
Q9BQE5	APOL2	-0.0764088668745983	3.03916055547803	-1.59456964319373	0.166535558606122	0.751123342519793	-4.93102519775357
Q8N8R7	ARL14EP	0.0693445243563333	3.40470656640789	1.86369502815785	0.116243192920523	0.732223559156751	-4.93192315349363
Q8N5C8	TAB3	0.0829976069313649	3.27562963366087	1.34092681121081	0.232806427556961	0.786410005484476	-4.93212494919369
Q9UM11-2	FZR1	0.310146378006729	3.32945784956739	1.16172608598842	0.293399194794376	0.805526338009025	-4.93228533384995
Q9NRP2	CMC2	0.153832788558695	3.26118313962845	1.50421015411438	0.187778110773431	0.764603346383734	-4.93236133991894
Q9NX40	OCIAD1	-0.184139440732567	3.38021073698523	-1.61153069567033	0.16281496436432	0.751123342519793	-4.93289188441662
Q86XN7	PROSER1	0.0669452468110467	3.36906896085171	1.79713137002607	0.127064023731087	0.733441736359969	-4.93333840467629
P62341	SELT; SELENOT	-0.0847718135019132	3.27422371848789	-1.13993421909179	0.301639972733823	0.806321739619344	-4.93380775683427
Q9NPJ3-1	ACOT13	0.108768195624949	3.29260905672022	1.8025424934097	0.126147837057109	0.733441736359969	-4.93429766018053
P48553	TRAPPC10	0.0561687350182611	3.29469511089554	1.78755677650503	0.128701479911866	0.734831624616109	-4.93516071200916
Q96B02-3	UBE2W	0.0976939600055605	3.31794330515921	1.02434346358698	0.348714985974627	0.8254949786149	-4.93521830319381
Q6VY07	PACS1	0.0933894062743904	3.29916763333346	1.9662053408527	0.101369972291851	0.718716301334403	-4.93590372237081
Q9Y371-2	SH3GLB1	0.0642278937012496	3.27457624435177	1.74633691668774	0.135994600174266	0.734995534891536	-4.93674409626793
Q7L576-1	CYFIP1	-0.0466378225767572	3.32034099301862	-2.00752538716962	0.0959374144651932	0.713900915399576	-4.93727408875151
P16298-4	PPP3CB	0.0706322810149744	3.3226598582818	1.4186859230321	0.210236562900955	0.77771670566293	-4.93732391339046
Q8N4S9-1	MARVELD2	-0.0944955535046245	3.39534964448076	-1.20656909981981	0.277053957918473	0.799305333873119	-4.93738628446564
Q5T1C6	THEM4	-0.023968378123827	3.18196455496962	-0.139679126662192	0.893900262135018	0.978578765088333	-4.93815512566017
Q8TCD5	NT5C	0.0797940710291377	3.31944813127389	1.5156682018159	0.184947543039714	0.7641205515961	-4.93936215679391
Q00169	PITPNA	-0.0668824683418217	3.31046464309115	-2.01025522635385	0.0955891977316872	0.712000315531558	-4.94127566004456
Q8WV93	LACE1; AFG1L	-0.101045071056888	3.31184165692409	-1.30576084810649	0.243725854859152	0.789594391611883	-4.94144877642167
Q99418	CYTH2	-0.103791749938602	3.39585863141764	-0.982828116173677	0.367040955293733	0.829107774976977	-4.94181451016767
Q3SY77-1	UGT3A2	-0.137124214980845	3.38639039243493	-1.41356449190584	0.211658351039547	0.77771670566293	-4.94341344371052
Q8IZA0	KIAA0319L	-0.0497276971106603	3.34497166178351	-1.98143831919747	0.0993314523819571	0.716105600093805	-4.94347543389689
P13747	HLA-E	0.0966377059296716	2.80646957517687	1.04822285782445	0.338517756583661	0.820312137874241	-4.94389665964326
Q6ZU80	CEP128	-0.0773001199683607	3.26994981082556	-1.58049259666117	0.169685858067718	0.753373786513619	-4.94440964034066
Q9BY49-1	PECR	-0.0621095234382941	3.27941386016349	-1.73536798493532	0.138003609423039	0.73936011975807	-4.9444749274472
Q8IWZ8-1	SUGP1	0.0636038135664076	3.34605142733659	2.18049646215969	0.0762612424007975	0.69321830770014	-4.94502414045839
Q92783	STAM	0.0929105369085158	3.22245619691942	1.85771103695388	0.117176829858796	0.733263163684083	-4.9453562344052
P01130	LDLR	-0.0530068618478108	3.3715375151626	-1.81442518787812	0.124159052341696	0.733441736359969	-4.94596238405222
O75161	NPHP4	0.0892262101784393	3.39289314141703	0.769149203917637	0.473614517036467	0.873539701671012	-4.94632211329487
Q5VUD6-1	FAM69B	0.0841096623493706	3.26675519588747	0.645854464689498	0.544429021167644	0.896706623099649	-4.94632406535431
P30041	PRDX6	0.0792681480757432	3.32940383670589	2.31132356940542	0.064204763380571	0.667644697400095	-4.94674405721715
P22692	IGFBP4	-0.105270766753536	3.41128092366407	-1.30923001489936	0.24262831856878	0.789594391611883	-4.94872612083137
O00425	IGF2BP3	-0.0624799954426779	3.43769599543287	-2.38888799197038	0.058022051345107	0.667644697400095	-4.948732688874
P17019	ZNF708	-0.0846788155011536	3.34919407580512	-1.06029041205597	0.333459147958687	0.817829395468225	-4.94896150521588
Q15008	PSMD6	0.0991731784662754	3.36301697318312	2.26219318032078	0.0684786718785684	0.676483378152322	-4.94918910343003
Q8NF50-1	DOCK8	-0.0604707841706251	2.22371748124394	-0.332090633191383	0.75214179153812	0.940729022608487	-4.94966262983682
Q8NHZ8	CDC26	0.0878542246489352	3.38666978859219	1.07711432244284	0.326511972404202	0.814750236577389	-4.95000253337644
O94889	KLHL18	0.0768139875368938	3.35095711580997	0.570394102396862	0.590990967110181	0.90554186600661	-4.95158354292979
Q9NYW8	RBAK	0.103457763925139	3.29738698331852	1.1672433378013	0.291343925088269	0.805261228584964	-4.95191133184328
A6NKD9	CCDC85C	0.0923909993376972	3.33405586160261	1.51828968295433	0.184305671977955	0.7641205515961	-4.95213394979631
Q6PCB0	VWA1	-0.0929927444198292	3.38662556586647	-1.03914665350704	0.342364190800833	0.823649442403257	-4.95335725719585
Q15276	RABEP1	0.0578618102551908	3.20552837402409	2.18916390949307	0.0753932846762935	0.692419402141054	-4.9535383937122
Q9H8G1	ZNF430	-0.0758682175488241	3.38932825119024	-0.445306010970155	0.67313182565945	0.924645652093525	-4.95390529715434
Q9BZR6	RTN4R	-0.112367143157215	3.37206365342026	-1.3812020010095	0.220851272106643	0.781317205082192	-4.95487647238733
Q86YB8	ERO1LB; ERO1B	0.0663516151308515	3.09272052123315	0.393448683372973	0.708823836058295	0.931042909284337	-4.95518679390814
Q9Y2L8	ZKSCAN5	0.0291297754692614	3.29450022892923	0.162797768782904	0.876508674577557	0.975707276749712	-4.95539804762777
Q96FH0-1	MEF2BNB; BORCS8	0.0885529771072872	3.09219584399325	1.35802088859379	0.227661477194486	0.784100603281352	-4.95636260268695
Q7L2Z9	CENPQ	-0.0691175206943409	3.29397035063901	-1.7584472471137	0.133810240282607	0.734995534891536	-4.9567811139072
Q96EY9	ADAT3	0.0795451874494833	3.30804848548992	1.36902850906026	0.224403876896443	0.782971848466386	-4.95856194840322
Q86WG3-1	ATCAY	-0.0992751610151582	3.38369624926904	-0.96315597402298	0.375992126696873	0.832175940221092	-4.95897183786802
Q86SX3-1	C14orf80; TEDC1	-0.0810746560410218	3.35222706514981	-1.40449822293321	0.214197253363308	0.778691920506784	-4.95975954380343
Q9UHR6	ZNHIT2	0.0970231402818685	3.27228160106829	1.51350454639859	0.185478918497388	0.7641205515961	-4.96059954204094
P20062-1	TCN2	-0.152036904804238	3.40391590910625	-1.4894335507046	0.191489275546473	0.76773129536073	-4.9606657242642
O43598-1	C6orf108; DNPH1	0.0828144797357748	2.88082701231055	1.29012928663623	0.24872710526504	0.791301284085605	-4.96212294987597
Q96EB1-1	ELP4	0.0607316803136857	3.3297062800333	1.8347792471033	0.12082520851294	0.733441736359969	-4.96346808085457
A8MQ14	ZNF850	-0.0633484295053477	3.30037217267398	-0.187247358239096	0.858199669830529	0.97010577087665	-4.96423063109555
Q9BYN0	SRXN1	0.0770878384042522	3.26249500099432	1.36897151477659	0.224420632791656	0.782971848466386	-4.96451598561731
P37275-2	ZEB1	0.0584660040084666	2.98867645491656	0.41347816619479	0.694933056502397	0.929436198170685	-4.96563543557905
Q9HAU4	SMURF2	-0.0373038241037251	3.31231369680644	-0.240171189718033	0.818920085232439	0.959199220443248	-4.96662331232342
Q96II8-2	LRCH3	-0.0573897162619368	3.29420873411047	-1.72458070057213	0.140008021069453	0.741298507691405	-4.96720610182514
P25325-2	MPST	0.0541164465164989	3.2962221988638	1.78563008377452	0.12903352371674	0.734831624616109	-4.96747297224027
Q5TCZ1	SH3PXD2A	0.0870347959974445	3.32619199340133	0.570036919977953	0.591216931764657	0.90554186600661	-4.96842181796295
Q12788	TBL3	-0.0742807778466332	3.3228622620141	-2.19543160332775	0.0747720805439149	0.692419402141054	-4.96875446274982
Q96FX7	TRMT61A	0.0656211524766661	3.292276564178	1.61620658925677	0.161803509771588	0.751123342519793	-4.96923598373838
Q14185	DOCK1	-0.0509389253801371	3.37773982674262	-2.15381737558994	0.078999013107538	0.695366842612303	-4.96935843539287
Q9BRK5-1	SDF4	-0.0646436633152679	3.29866779010812	-2.07976042389865	0.0871481687870703	0.697991490104712	-4.9705069110606
Q56NI9	ESCO2	0.0834591362666773	3.27437369719158	1.75333272517835	0.134728470552747	0.734995534891536	-4.9715447952808
Q8IZP0-9	ABI1	-0.0544551879975263	3.23653201038347	-1.83385748645368	0.120974224238473	0.733441736359969	-4.97231989363614
Q8TE68-1	EPS8L1	-0.0947549812054121	3.4120285696797	-1.34052495577872	0.232928647866253	0.786410005484476	-4.97253836537601
Q8WXW3	PIBF1	0.0596755612855989	3.27799081207458	2.02205353194734	0.0940990867539756	0.71036960377837	-4.97324519032986
Q8N999-1	C12orf29	0.0881878140935245	3.24111657308111	0.843312876229903	0.434285242878802	0.859485461705432	-4.97335009482124
Q16625-1	OCLN	-0.173052070330085	3.36067857431083	-1.64859419461047	0.154963548707141	0.749139109615353	-4.9742182995838
Q9UH17-1	APOBEC3B	-0.100009847903332	3.25227086681116	-1.56702304776792	0.172753982259246	0.756873951976266	-4.97470036765149
P19388	POLR2E	-0.0986947810386698	3.31541256463168	-1.75993754548948	0.13354385353404	0.734995534891536	-4.97506086281246
Q9UJ41-1	RABGEF1	0.0692010779036175	3.26876992403582	1.8999768210466	0.110741179146491	0.725032462556748	-4.97541327889582
Q9BT17-1	MTG1	-0.101623618180221	3.34027911238828	-1.61453406031005	0.162164596116336	0.751123342519793	-4.9755006305889
Q96J01	THOC3	0.0467962817889996	3.25618596134768	2.01366923095623	0.0951555359799945	0.712000315531558	-4.97579825049535
Q8NFJ9-2	DPP3; BBS1	0.0866731479762763	3.22316738476571	0.601519768827722	0.57149902544731	0.900131497276075	-4.97635108588601
A8MW92	PHF20L1	-0.0840195693504219	3.25796974972186	-0.860390904140545	0.425581294235512	0.856296797633057	-4.97710879624074
P29323	EPHB2	-0.0917493489972242	3.29602737218413	-1.63922402067428	0.156912934652674	0.749139109615353	-4.97812366404019
Q5VWJ9	SNX30	-0.0870190411561715	3.06379891519594	-1.59233746214704	0.167031299748201	0.751864550913203	-4.97824190663879
P19440	GGT1	-0.0763499301060587	3.30075098823612	-1.3002113388279	0.245490894724176	0.790682680236724	-4.97876541754802
P24864-1	CCNE1	0.0833168703257941	3.31363167123589	0.862634333819171	0.424447738153902	0.85581157611478	-4.9798819741597
Q9UHJ3-1	SFMBT1	-0.0597582078311588	3.30072497183295	-1.61349523778693	0.162389263780786	0.751123342519793	-4.97988913299189
Q9HBL0	TNS1	-0.0894904144071793	3.37797682773716	-0.990199444921361	0.363731296327393	0.828055342855716	-4.98044474906688
Q9HCE1	MOV10	-0.071288220518896	3.35811309003322	-2.06032263311943	0.0894282725723477	0.700810732558786	-4.98053079251189
O43736-1	ITM2A	-0.0690985472540435	3.36740912253463	-1.42703523426588	0.207937743515997	0.776986386711222	-4.98110948703845
Q9BW83-1	IFT27	0.102716921697715	3.2964405841086	1.7051462743349	0.143692079224515	0.747380648769817	-4.98115538047375
O95453	PARN	-0.043637593838065	3.33913649158719	-2.07987366473244	0.087135062982433	0.697991490104712	-4.98115998560827
Q9BTV7	CABLES2	0.088454294268021	3.29382974403066	1.05802247587274	0.33440502063687	0.817829395468225	-4.98174874042643
Q02750	MAP2K1	0.0572551268491126	3.30911023547738	2.06771359395136	0.0885541112660215	0.697991490104712	-4.98212731280052
P13591-2	NCAM1	-0.110349572056969	3.14961377999328	-1.83072479136518	0.121482050971541	0.733441736359969	-4.98262034319813
Q8NDN9	RCBTB1	0.079431374000612	3.38614121340511	1.14044996029553	0.301442662557972	0.806321739619344	-4.98287026156526
O60941-1	DTNB	-0.0809623816104529	3.37419917246054	-1.13318032793476	0.304234097060228	0.806321739619344	-4.98287629041689
Q92567	FAM168A	0.0884131967390848	3.20886021623928	1.06191906160246	0.332781273487176	0.817829395468225	-4.98363760435588
Q6PML9	SLC30A9	-0.179307043667252	3.26873263079365	-1.30675744654952	0.243410102691863	0.789594391611883	-4.98376112903948
Q9P2N5	RBM27	0.0830027184495806	3.36707747620303	2.10037648456565	0.0847955149265222	0.697991490104712	-4.98419433540654
P07197	NEFM	0.11840181461038	2.32510695381191	2.03108757231312	0.0929742650802643	0.71036960377837	-4.98559305423634
Q9Y6N5	SQRDL; SQOR	0.130161964375008	2.23389111329787	1.29237825650836	0.248001896746692	0.791015351126171	-4.98618557924593
Q86XI8	C19orf68; ZSWIM9	-0.0943159591444949	3.34606144761796	-1.09033635023047	0.321137643045451	0.812576145870308	-4.98632320928517
P86790	CCZ1; CCZ1B	-0.0818856520718716	3.32368717894846	-1.72654781106935	0.139640371602548	0.741298507691405	-4.98658087118277
Q9BVJ7	DUSP23	0.100703389898144	3.32941810434232	1.30767347663103	0.243120203805075	0.789594391611883	-4.98710884237558
Q8WWB7	C1orf85; GLMP	0.0908495450812374	3.26139073274113	0.796006935160631	0.45908486684401	0.868459233534925	-4.98728672294779
Q9NRC1-1	ST7	-0.118456176717681	3.29000554915899	-1.23296361861075	0.267811328605255	0.797304002637856	-4.98746074422845
O15258	RER1	-0.131226601321423	3.25992146153009	-1.79089117848313	0.12812884821504	0.733441736359969	-4.98747726762118
O75865-2	TRAPPC6A	0.082991819774415	3.31776909529789	1.2147349057819	0.274164921849676	0.799305333873119	-4.98827296886066
Q24JP5-2	TMEM132A	-0.0800936837731817	3.33699265349857	-1.48703827265259	0.192097363303237	0.76773129536073	-4.98869726062799
O43424	GRID2	-0.0960010276896048	3.40592633643593	-0.839111201745887	0.43644692322012	0.859485461705432	-4.98893491564778
Q6P4I2	WDR73	0.106943486804467	3.2168049073888	1.33789562256216	0.233729781353744	0.787448824294213	-4.98989055336591
P98170	XIAP	0.0581085595310647	3.31519621053314	1.88427247743278	0.113089599353578	0.727089788587402	-4.98990919488863
Q70EK9	USP51	-0.106635062861398	3.36964140123189	-1.12715545246107	0.306564319812915	0.806798768816923	-4.99116972897254
Q96EZ8	MCRS1	-0.0536541889810882	3.35653206417514	-1.84533861766837	0.119131249265589	0.733441736359969	-4.99147165994355
P52788-1	SMS	0.0634371540338688	3.38958570514875	2.23166748544323	0.0712842534779323	0.689650432134548	-4.99245426560584
Q06945	SOX4	0.0821209206732203	3.38273881362691	1.48661505533742	0.192204995101081	0.76773129536073	-4.99258165648267
Q6NT76-5	HMBOX1	0.119850638293293	3.28225861337692	0.967280873564167	0.374100904184883	0.832175940221092	-4.99322003613706
P35626	ADRBK2; GRK3	0.10293987093831	3.12903948527127	0.912744537078915	0.399722347410234	0.842260326649634	-4.99402042154604
Q17RS7	GEN1	-0.0690065961223532	3.3216999528832	-1.69616021642405	0.145427683760617	0.749139109615353	-4.9947479376252
P61204	ARF3	0.112832965153868	3.26642402474747	2.02768976240027	0.0933956912272789	0.71036960377837	-4.99544916068323
P15880	RPS2	-0.0697565280443346	3.36067310482776	-2.42317445861987	0.0554936204821001	0.667644697400095	-4.99617917428272
Q01658	DR1	9.79071960839619e-05	3.21066788326288	0.000586133026462318	0.999553065036877	0.999683367874191	-4.99734686772823
Q9BRT9	GINS4	0.0681142016992767	3.34478716647789	1.72984680333236	0.139025938970928	0.740016586066525	-4.99814255024962
Q86WP2-2	GPBP1	0.0873183281738069	3.36985204556623	1.76598644500749	0.132468034302403	0.734995534891536	-4.99826899900895
Q9UJA5-1	TRMT6	0.0425712889498524	3.28561960176117	1.9062368357073	0.10981889343788	0.725032462556748	-4.99915483562522
Q96CB9	NSUN4	-0.109500264484898	3.25586963307417	-1.37801306179859	0.2217768538845	0.781317205082192	-4.99943462249493
P08133-1	ANXA6	0.0399436257473375	3.14106007213494	2.35657081154652	0.0605176546358854	0.667644697400095	-4.99966372469961
Q8NEY8-2	PPHLN1	0.116952541811894	3.34327465417038	1.39158318052646	0.217862831277533	0.779937206141629	-4.99995880399287
P49356	FNTB; CHURC1-FNTB	0.0283122349497644	3.33536354393997	0.19339433883958	0.853611493539642	0.968773280833747	-5.00092324455617
P13987	CD59	0.167247633407043	2.93418726991126	1.52410338307799	0.182889751761656	0.7641205515961	-5.00192007855265
Q6JBY9	RCSD1	0.122912949942692	1.87321635174814	1.46929798166034	0.196658259704005	0.768988450927102	-5.00207657678398
Q8NBN3-1	TMEM87A	-0.062712903932336	3.31859560746108	-1.86556600364505	0.115952821832247	0.732223559156751	-5.00208428916268
P23025	XPA	0.101139925894495	3.14477820942745	1.04412146297233	0.340251449298411	0.821917228909764	-5.0021378192088
O43583	DENR	0.119631384939904	3.3422326988143	1.93194917857561	0.10611179160372	0.722811621274888	-5.00219109443383
Q9ULL8-1	SHROOM4	0.0797616678581481	3.3530273912519	1.1599820751249	0.294051474383147	0.805559563533734	-5.00340815480358
Q13188-2	STK3	0.0545400273725339	3.33055757032952	1.61087557503087	0.162957164401158	0.751123342519793	-5.00477243546938
Q92750-1	TAF4B	-0.0704276641645839	3.28839567883396	-1.26220950303634	0.257890343979227	0.79390101232215	-5.00531578830802
Q8N680	ZBTB2	-0.0670889740975619	3.32476608478004	-1.55943605262604	0.174505603644966	0.758546715513223	-5.00550848155236
Q92794	KAT6A	-0.0545047045585993	3.13008252969848	-1.68644596151112	0.14732715480919	0.749139109615353	-5.00669893866568
Q96EM0	L3HYPDH	0.0789614803317765	3.27412127435835	1.36980013914051	0.224177136754158	0.782971848466386	-5.00695242960884
Q9BU23-1	LMF2	-0.139184685160887	3.23098437107762	-1.37760338378524	0.221896021148606	0.781317205082192	-5.00709214091685
Q5SWA1	PPP1R15B	-0.0668387195476674	3.21830743562289	-0.40025145803857	0.704091573262024	0.931042909284337	-5.00733123186079
O00512	LOC101060700; BCL9	0.0502510067235251	3.39278352804798	2.02480202378141	0.0937553994332271	0.71036960377837	-5.00803400948081
Q8IX21	FAM178A; SLF2	0.104131687668558	3.29417753415557	1.47749066958159	0.194539411855936	0.768145325660701	-5.00816895878246
Q9BXJ8-1	TMEM120A	-0.207447515456574	3.33373382504289	-1.43804352119094	0.20494270709744	0.776454542642746	-5.00885084919029
Q9UMS0	NFU1	-0.086453763475413	3.31731015101642	-1.33748562506623	0.233854930417483	0.787448824294213	-5.00913095662604
P63173	RPL38	0.237785598288395	3.3614739516414	1.81306984854902	0.124384296618671	0.733441736359969	-5.0091831854985
Q8NHU6	TDRD7	-0.0854658696647712	2.97561553000084	-0.795446307157217	0.459384836969896	0.868459233534925	-5.00918837764539
P17544-6	ATF7	-0.0854013825055696	3.32031926005026	-1.55286832518366	0.176035674829375	0.759587006350373	-5.01005203239709
P68402-1	PAFAH1B2	0.104450717195784	3.34355189467904	1.61011910395302	0.163121513395334	0.751123342519793	-5.0102189852278
Q9H0T7	RAB17	-0.101571404497442	3.44614058797129	-1.60213110227805	0.164866804966189	0.751123342519793	-5.01187507178285
O95639	CPSF4	-0.0591785212684145	3.33403891541827	-1.81525155689943	0.124021918499527	0.733441736359969	-5.01236598891879
Q9BVG3	TRIM62	0.120376331630732	3.28325131141854	0.984852773867287	0.366129494824054	0.829107774976977	-5.01371752085762
Q8IW45	CARKD; NAXD	0.0687042401607768	3.31598837332218	1.46052046011316	0.198952499096735	0.76933647836197	-5.01383904667915
Q8TCA0-1	LRRC20	-0.11191408497186	3.20696390244975	-1.56182636453385	0.173951914392054	0.757600745327352	-5.01461718332298
O75586-2	MED6	-0.0776304092074566	3.29147497805271	-1.30658606669273	0.243464374563245	0.789594391611883	-5.01571120719881
Q9Y2Q9	MRPS28	-0.0770588290519495	3.34430261854163	-1.26424310119309	0.257212840591134	0.79390101232215	-5.01585435643481
Q96EY8	MMAB	-0.105966317362242	3.27002452253055	-1.42679109847461	0.208004627213464	0.776986386711222	-5.01661266561592
Q8N6C5-4	IGSF1	-0.136856720581541	3.45360745367183	-1.66547788520822	0.151510602492848	0.749139109615353	-5.01716909524134
Q86WW8	COA5	0.0885591633619595	3.36070548020704	1.48306786433591	0.193109356274558	0.76773129536073	-5.01721207610039
Q6UX71-1	PLXDC2	0.0985954264261126	3.40371048625461	1.39143617063171	0.217904888701123	0.779937206141629	-5.01753153455252
P42331-4	ARHGAP25	0.100483922649828	2.3564200076333	0.856808079111288	0.427396349121381	0.856890068589646	-5.01807274179781
Q9UGY1	NOL12	-0.112724583939508	3.25804562613944	-1.6094202496321	0.163273487600038	0.751123342519793	-5.0193184662841
A6NGN9	IGLON5	-0.0827593364140284	3.37731481590297	-1.23172778404932	0.268237924757049	0.797304002637856	-5.01977356759439
Q92834	RPGR	-0.0745897453270723	3.29551457134585	-1.59459980494276	0.166528869790494	0.751123342519793	-5.02056655065142
Q9H6T0-2	ESRP2	-0.0834195223961721	3.36033565691618	-1.77144305079583	0.131504959783582	0.734995534891536	-5.02178329428213
Q8IYR2	SMYD4	-0.0667531026507157	3.32449531216397	-1.60588283711576	0.164044849104155	0.751123342519793	-5.02263621903291
Q03405	PLAUR	-0.102921421160725	3.36892651962044	-0.981327848378676	0.367717523106884	0.829172090510251	-5.02277881529446
P98179	RBM3	0.0607316791932209	3.27836982137991	1.80921390631121	0.125027359128497	0.733441736359969	-5.02280324725771
Q7L9B9	EEPD1	-0.0855130994552459	3.27357129460991	-1.47114526503085	0.196178609815181	0.768988450927102	-5.02398053151393
Q03519-1	TAP2	-0.14194958718596	3.07790739592838	-0.995664402532354	0.361293167191673	0.828055342855716	-5.02402052104346
O75083	WDR1	0.10353509305662	3.39166047518066	2.48381931640017	0.0513048027820391	0.663179035285209	-5.0240599125011
Q96SB8	SMC6	0.0564751334864167	3.29425785221864	2.13847020115238	0.0806201877802726	0.695366842612303	-5.02546097826813
Q9UID3-1	VPS51	0.0510862848702123	3.3009555324247	1.83881211585684	0.120175404897256	0.733441736359969	-5.02739978614504
P10244	MYBL2	0.0591978538312139	3.27087580825082	1.82854131360543	0.121837270655517	0.733441736359969	-5.02755684889777
Q9BRU9	UTP23	-0.0794962217582427	3.30685178172339	-1.58252119236966	0.169228355792801	0.753114235459805	-5.02774639733224
P17655-1	CAPN2	0.0622415364763083	3.1064528350226	1.9263616243014	0.106906412771495	0.722811621274888	-5.02818921942212
Q9HBH1	PDF	-0.104469480974059	3.29846736351413	-1.17198420510229	0.289587856159611	0.804294176947412	-5.02911694309152
Q9BQT9-2	CLSTN3	-0.0781353501951613	3.32421799781173	-0.870588650982491	0.420446980210814	0.855393507102659	-5.02947582132463
Q5W0Q7	USPL1	-0.081877803233378	3.33685895085387	-1.21567782898345	0.273833032903804	0.799305333873119	-5.02967332188684
Q9H9D4	ZNF408	0.0528640954120205	3.40114446117555	0.35348814517721	0.736909901209898	0.93726338893938	-5.03025239354773
Q9BYK8-1	HELZ2	-0.0693361594657668	3.33721318372685	-1.50568655315	0.187411086190144	0.764423279376019	-5.03026898814103
Q9HBH0	RHOF	-0.080709326050799	3.33767623625514	-0.688725145864349	0.519049795703224	0.887317516103329	-5.03132466582216
Q86SQ7	SDCCAG8	0.0697139204137443	3.23678360161952	1.22006585479279	0.272293196157672	0.799305333873119	-5.03342254292044
Q8N350	C19orf26; CBARP	-0.084808775143718	3.33236908768537	-1.14221775825732	0.300767186794021	0.806321739619344	-5.03354422658913
Q9UNW1	MINPP1	0.0628551878946328	3.35867734956303	1.68585166865443	0.147444148270709	0.749139109615353	-5.03411592806826
P23142	FBLN1	-0.0955242423279793	3.25043700299756	-1.28965482953232	0.248880343912743	0.791301284085605	-5.03456826552564
Q6PIW4	FIGNL1	0.0620967880413564	3.31589807689463	1.85342067733518	0.117850873639556	0.733441736359969	-5.03554365416818
O96011-1	LOC101060567; PEX11B	-0.116471597014381	3.13105934805259	-0.879799216116087	0.415850197429081	0.855031550227205	-5.03647651682425
Q7L523	RRAGA	-0.0638763012599486	3.24992300059585	-1.50983877470019	0.186382519398167	0.7641205515961	-5.03655944597325
Q96HA8	WDYHV1	0.0788910562503759	3.38616446411461	1.03120973337053	0.34575730809437	0.825017911289336	-5.03671893374413
Q7Z6B7-1	SRGAP1	0.0687229056442556	3.34177239451315	1.48062670275928	0.193734070362145	0.76773129536073	-5.03706439735479
Q13491-4	GPM6B	-0.104475032729202	3.40531355970748	-1.0836534964155	0.323844635514811	0.812576145870308	-5.03724020234996
Q9ULX7	CA14	0.116227976499737	3.4378816194369	1.4608488174637	0.198866222200228	0.76933647836197	-5.03732220075074
Q9UL12	SARDH	-0.0766030480057963	3.40034047579547	-1.13500926408242	0.303529733008179	0.806321739619344	-5.0374415305918
Q9NWS9	ZNF446	-0.0746136933379739	3.17683566867529	-0.597974072638027	0.573699429886492	0.900673729633495	-5.03745732419002
Q9BQ69	MACROD1	-0.0638892570768664	3.15341422286023	-1.52151647213061	0.1835185054522	0.7641205515961	-5.03802187045084
Q8N0Y2-1	ZNF444	-0.0757089336008994	3.3191878565461	-1.40045548869799	0.215338473142867	0.779640665446421	-5.03805858933491
P20591	MX1	-0.0911061357433591	3.1879314111938	-1.07105109157939	0.329001607951604	0.814864197235171	-5.03816924449482
P50895	BCAM	-0.0982140560474786	3.40818696186939	-1.82235406025295	0.12284952149839	0.733441736359969	-5.03854408546418
Q8N5G2-1	TMEM57; MACO1	-0.0635015668954389	3.33790945970133	-1.61514793917772	0.162031973518491	0.751123342519793	-5.03863362540346
P83916	CBX1	-0.0775175043162548	3.30735148101772	-1.90057119950266	0.110653273055359	0.725032462556748	-5.03874297403129
Q9GZV5	WWTR1	0.0759718042826366	3.36006523714249	0.671275310150886	0.529284136760964	0.891254983361914	-5.03889400675387
Q6P6B7-1	ANKRD16	0.0999662832904162	3.18777489116426	1.07476751976325	0.3274737192589	0.814750236577389	-5.03989744464849
P61421	ATP6V0D1	0.113845825830579	3.27964142969432	1.80453106886649	0.125812803975303	0.733441736359969	-5.04035472422126
Q8N3F8	MICALL1	-0.0537323412674341	3.25309899528632	-1.97375154673677	0.10035482201199	0.716206692535801	-5.04048934729019
Q9BQS8-4	FYCO1	-0.0571168248737968	3.26489533208258	-1.75257213562995	0.134865555956534	0.734995534891536	-5.04164228642284
O95319-3	CELF2	-0.0753459371021698	3.2597203327514	-1.63479577735886	0.157842496777351	0.749139109615353	-5.04255972616487
Q96AQ6	PBXIP1	0.0878345185653299	3.03269096232334	1.80247114898325	0.126159873668331	0.733441736359969	-5.04264888968698
Q9BVW5	TIPIN	0.0886418596202635	3.28236576384388	1.35675493236605	0.228038898233451	0.784100603281352	-5.04346308050452
Q9H5J8	TAF1D	-0.0996684174399572	3.3313687583235	-1.23209349424317	0.268111623049672	0.797304002637856	-5.04418927902254
Q15329	E2F5	-0.0836494573545874	3.37761970718259	-1.41562983819696	0.211083904786101	0.77771670566293	-5.0442390109867
Q15834	CCDC85B	-0.0938213615410542	3.26547158490889	-1.06068865715352	0.333293284733945	0.817829395468225	-5.04425132449634
Q9C099-1	LRRCC1	-0.0897840642216222	3.25229334143803	-1.00867033760182	0.35554395682012	0.827081067945794	-5.04431346825193
Q96MT1-5	RNF145	-0.172083069697828	3.36156030899578	-1.31367910643717	0.241227321673209	0.789594391611883	-5.0447410691949
P17677-2	GAP43	0.166436236340414	3.34948171854445	1.74519249567434	0.136202843343676	0.734995534891536	-5.0448041299381
Q15059	BRD3	0.0488936794852601	3.32704113773236	1.83252304057227	0.121190283759533	0.733441736359969	-5.04481253687156
P08648	ITGA5	-0.087648652624033	3.30373971594171	-1.59136501851106	0.167247713999728	0.751864550913203	-5.04569306536968
Q5TCX8	KIAA1804; MAP3K21	-0.0787676347448446	3.29906312634442	-1.06469809506887	0.331627239705722	0.817821981042204	-5.0458146723309
P49674	CSNK1E; LOC400927-CSNK1E	0.078901296997707	3.30252845855824	0.874194228080814	0.41864294009638	0.855393507102659	-5.04614739250615
Q15904	ATP6AP1	-0.0830180626852499	3.17756709676752	-1.32684542889928	0.237124242925217	0.789594391611883	-5.04667146596591
P53985	SLC16A1	-0.151517130797658	3.19738960968392	-1.75711893702284	0.134048117346134	0.734995534891536	-5.04734532577833
Q96BU1-1	S100PBP	0.0805817640586895	3.30218550736292	1.50347280506087	0.187961667267951	0.764603346383734	-5.04748002785678
Q9ULK4	MED23	-0.0666344138791353	3.27225524326248	-1.92615814838593	0.106935463624621	0.722811621274888	-5.04839882749945
Q8ND76	CCNY	-0.0772208086818335	3.31004563047614	-1.02962120119577	0.346439736317642	0.825017911289336	-5.04848297320713
O60779	SLC19A2	-0.0714034270746762	3.34299040832025	-0.437330033015491	0.678563016099126	0.925850489727211	-5.04924216232831
Q9UHK0	NUFIP1	-0.0671379194183831	3.33999542083013	-1.63134515118691	0.158570558477415	0.750495573497054	-5.04999383540391
Q9GZP9	DERL2	-0.101343076506676	3.3205429839281	-1.06049680957654	0.333373177847967	0.817829395468225	-5.05124469181225
Q7Z6M4	MTERFD2; MTERF4	-0.114292487118772	3.35075516425932	-1.40174954977016	0.214972560953255	0.778691920506784	-5.05134079528223
Q8IYK4	COLGALT2; GLT25D2	0.077120108146988	3.36058039021983	0.826945086004413	0.442751270666498	0.862366828024698	-5.05152927024219
Q9Y508-1	RNF114	0.101769474147595	3.40012137112593	1.75582371767299	0.134280473220613	0.734995534891536	-5.05279807840008
P57088	TMEM33	-0.136499231664665	3.31362060339776	-1.40345442114305	0.214491368144593	0.778691920506784	-5.05305048664656
Q8N4B1-4	FAM109A	-0.0793660931359315	3.34932138088101	-1.06284069147223	0.332398182877778	0.817829395468225	-5.05323404391595
P07384	CAPN1	0.0665075759454669	3.34146715863276	2.14231450799466	0.0802108738203299	0.695366842612303	-5.05327735692113
O94910	LPHN1; ADGRL1	-0.0743114133306079	3.33137137068642	-1.49665905960835	0.18966596988948	0.76773129536073	-5.05472631617748
Q9NRP7	STK36	-0.0770625454575952	3.42177889687738	-1.03857843741463	0.342606193218496	0.823973264693511	-5.0549185241952
Q9H4B8	DPEP3	-0.0801410575720377	3.28907565461917	-0.828950700409649	0.441707367586948	0.861846114986537	-5.05517543915001
Q9BV90	SNRNP25	-0.0966815234073541	3.29294750859639	-1.03198130164144	0.345426244051795	0.825017911289336	-5.05519572908005
Q8NFI3-1	ENGASE	0.062092739888334	3.23413230180085	0.496591750944691	0.63874546311303	0.91523541886182	-5.05530613290555
Q9GZU8	FAM192A	0.0787808450456329	3.3552493924241	1.88733567698425	0.11262760334969	0.727089788587402	-5.05537679599127
Q9UN73	PCDHA6	-0.0718690100725832	3.44182861703125	-0.514540054994217	0.626938771602167	0.910961033282542	-5.05639317972679
O75096	LRP4	-0.0711653916339029	3.37743876525405	-0.683523093911348	0.522086941228939	0.888915005128366	-5.05662841759682
P28676	GCA	0.0862543226710687	3.30670767213027	1.34021112087177	0.233024138397587	0.786410005484476	-5.05727739997937
P51580	TPMT	0.0826134073736664	3.34478785010809	1.62342783124773	0.160253444423083	0.751123342519793	-5.05809265507548
Q8N6Q8	METTL25	0.0591601453372619	3.39860821021591	1.63856846172747	0.157050210092697	0.749139109615353	-5.0586836745196
Q99504	EYA3	0.0680870845981128	3.29993930450136	1.48980324901535	0.191395583016406	0.76773129536073	-5.05882885755954
O00422	SAP18	0.175554201377569	3.31295127790327	1.93324456610105	0.105928431043602	0.722811621274888	-5.06180267560516
O43805	SSNA1	-0.116550553784111	3.36998528518278	-1.22226831448618	0.27152319745285	0.799305333873119	-5.06180292762462
Q9UQF2	MAPK8IP1	-0.0838306439924045	3.39100018303882	-0.987674934453124	0.364862057579348	0.828662435094362	-5.06288324462708
Q9NUS5	AP5S1	0.0759054643363728	3.27616896180928	0.820159349782585	0.446296687982128	0.864688649090355	-5.06298760951377
A1A4S6	ARHGAP10	-0.0705175277020371	3.06598289677511	-1.20724323293586	0.276814441902655	0.799305333873119	-5.06323434157731
Q14573	ITPR3	-0.121737894902361	3.25450981700913	-1.65625394712971	0.153387589502695	0.749139109615353	-5.0632906492246
Q13503	MED21	0.0910098483602012	3.32193047784408	1.26566639101171	0.256739612124431	0.79390101232215	-5.06340179239024
Q8NDA8-1	HEATR7A; MROH1	-0.0904581084266619	3.11302430905891	-0.679019957047327	0.524725555423772	0.890308031433811	-5.06360858322459
Q8N9M5	TMEM102	-0.0819827109563697	3.24971926838956	-0.658624857514369	0.536786126433157	0.892464897004017	-5.0638904786057
P15170-3	GSPT1	0.0990160375856912	3.32635163577669	2.12247486242521	0.0823467369169662	0.695775512805027	-5.06420435159272
Q9NT62	ATG3	0.0786637437022076	3.21955040292815	1.6104565208165	0.163048187203857	0.751123342519793	-5.06492019965819
Q9ULI4	KIF26A	-0.0677387780869111	3.36728946445023	-0.590055899957417	0.578632020573105	0.901371314793385	-5.06525732577867
Q5JTJ3-2	COA6	-0.0696748924685157	3.21439282493511	-1.51049491256689	0.186220476354329	0.7641205515961	-5.06613353979612
Q7Z2W4	ZC3HAV1	-0.035967614741128	3.34513798948541	-2.04815231161925	0.0908871809404323	0.705368538636562	-5.06663948294239
O15056	SYNJ2	-0.0435346536005584	3.38337539024652	-1.90558698071602	0.109914272765173	0.725032462556748	-5.06802314077606
Q8N8K9-3	KIAA1958	-0.0801530209999896	3.34758645001191	-0.906681731597604	0.402653437199561	0.844493485564524	-5.06807004685755
Q99576	TSC22D3	0.0768597183395074	2.93946267124904	1.2257804339456	0.270299309010839	0.797897767884247	-5.06900820428121
O00560-1	SDCBP	0.0758747148154283	3.31149773838809	1.75587007497143	0.134272150049706	0.734995534891536	-5.069043093645
Q9Y6I4-1	USP3	0.059148190913025	3.33466101497828	1.68359916639624	0.147888409039244	0.749139109615353	-5.06910337721172
P16403	HIST1H1C	-0.186464834131605	3.35905460108683	-1.65928892752889	0.152767500359544	0.749139109615353	-5.07007545639273
Q5T011	SZT2	-0.0786953313189018	3.27710572549597	-1.26364698426171	0.257411274800361	0.79390101232215	-5.07048818032148
Q96HB5-4	CCDC120	0.0275760869246397	3.31239039598378	0.197005966058632	0.850918706751504	0.967864835907715	-5.07129527966344
P23229-1	ITGA6	-0.125057489678592	3.40750547575747	-2.0488369123034	0.090804466503841	0.705368538636562	-5.07179273969838
Q9Y3R5-1	DOPEY2	-0.0750504476622434	3.28041501948768	-1.5429670799939	0.178366701811528	0.76407575878132	-5.07188056399136
Q96CS2-1	HAUS1	-0.0552918303527692	3.35183582081939	-1.66858156976693	0.150884102796007	0.749139109615353	-5.07225099420307
P54764	EPHA4	0.0702875081070855	3.31743902277592	0.70424362431087	0.510059873524057	0.883272868080136	-5.07234528602582
Q86V87	FAM160B2	0.0673239858242621	3.32840066992542	0.592542378963149	0.577080304711766	0.900673729633495	-5.07290163653651
Q9NT99	LRRC4B	-0.088700853152391	3.2160468388467	-0.850094383380395	0.430813168569746	0.858047411543896	-5.07321671274284
Q96NL6-1	SCLT1	0.070498650258311	3.28313704668037	1.4173287522432	0.210612465310134	0.77771670566293	-5.07441108031794
Q9Y3P4	RHBDD3	-0.0681578035385303	3.42043973189801	-0.688850407730438	0.518976808906804	0.887317516103329	-5.07461081798278
Q13287	NMI	0.0880750877409282	2.81968208587386	0.984713125843331	0.366192302996622	0.829107774976977	-5.07517037869697
P06746	POLB	0.103447609408128	3.32993790022337	1.75184436777032	0.134996855437822	0.734995534891536	-5.07602651689342
Q14849-1	STARD3	-0.0816136438176214	3.32894646186949	-0.834199271098625	0.438984160008473	0.860712609548438	-5.07650177739539
Q9NRP4	ACN9; SDHAF3	-0.119808771875578	3.33235811920477	-1.0253616978908	0.348275069629399	0.8254949786149	-5.07747737587302
O14548	COX7A2L	-0.142161503871397	3.30777134622711	-1.0234346777397	0.349108001164849	0.8254949786149	-5.07836393698926
P43686	PSMC4	0.115482188764033	3.38176128940882	2.20355016107473	0.0739753885782268	0.690707585170939	-5.0793105597176
Q9Y2K6	USP20	-0.0692981452175718	3.24221483827711	-1.233029951963	0.267788448088895	0.797304002637856	-5.07931506523638
Q86XA9	HEATR5A	-0.06529355350723	3.35471352464791	-1.88198635504415	0.113435644835256	0.727089788587402	-5.07952078609304
P08579	SNRPB2	0.149524159374698	3.33910089822283	1.66114270951894	0.152389954018782	0.749139109615353	-5.07952435792133
Q9C0D3	ZYG11B	-0.0518782530031525	3.32687061513019	-1.57916588189142	0.16998571268434	0.753527293187439	-5.0795799188137
Q9UBV8	PEF1	0.0824829434182198	3.29549808348458	1.06573096791948	0.331199176127148	0.817562846485563	-5.07969387323281
Q15696	ZRSR2	-0.0686729324048458	3.35903976358125	-1.71822901861678	0.141201686613481	0.744036505653461	-5.08013069719817
Q96S97	MYADM	-0.0836375015291407	3.35892962050909	-0.635988590339341	0.550381271840694	0.89764564574018	-5.08134896778554
Q86YV0	RASAL3	0.0977460085710523	2.59229613833871	0.824085984573315	0.444242554945602	0.862624368904747	-5.08188370321917
Q9NRY2-1	INIP	0.011353871707881	3.3060359058365	0.0749274298443315	0.942929864811038	0.985430798828445	-5.08223296525952
Q9Y4C4	MFHAS1	0.0873942420958184	3.30043400101052	1.09562993932281	0.319006952413725	0.81254586822878	-5.08398682957929
Q02487	DSC2	-0.0846883306001797	3.30571429509152	-1.79255648806551	0.127843810900815	0.733441736359969	-5.08408361872632
Q8TAP8	PPP1R35	-0.0726615759138871	3.31183268738519	-1.14946794333809	0.298010490912449	0.806321739619344	-5.08454303561176
Q96S66	CLCC1	-0.169487013759955	3.23346956092689	-1.80642420987805	0.125494677231294	0.733441736359969	-5.08491921435444
Q9H777	ELAC1	0.0724069026106797	3.3779130508911	0.781727671474526	0.466769311355784	0.87254504861763	-5.08496916845462
Q02127	DHODH	-0.161140545277518	3.34203232487029	-1.65571224554049	0.153498525387112	0.749139109615353	-5.08622872450326
Q99704	DOK1	0.0665322993897058	3.29979495758239	1.15872439807914	0.29452263783717	0.805559563533734	-5.08623023521787
Q15048	LRRC14	0.0869989185434119	3.26585567364652	1.37104807685776	0.223810882247995	0.782463362833446	-5.08634011674028
Q15831-1	STK11	-0.0780223239398586	3.31964317111087	-1.09019579524882	0.321194380167962	0.812576145870308	-5.08665054638252
Q99865	SPIN2A	-0.0842321557968714	3.3285174297162	-1.26676993691206	0.256373231537009	0.79390101232215	-5.08682093138323
Q5TAP6	UTP14C	-0.00340766633958325	3.33376379389031	-0.0260436956606793	0.98014395555104	0.993350650857012	-5.08851577908046
Q9Y4E1-4	FAM21C; WASHC2C	-0.100645382064593	3.31999061406231	-1.3933341337495	0.217362486365785	0.779937206141629	-5.09020654720605
P0C2W1	FBXO45	0.0216570021754141	3.17074854805599	0.145648071675281	0.88940319648478	0.978153227738383	-5.09108975734544
Q7L5D6	GET4	0.0660565612929709	3.36247611329321	1.66285536589782	0.152041961472066	0.749139109615353	-5.09167514535034
Q86TM6	SYVN1	-0.0995667661718312	3.14618591727193	-1.1676875991876	0.291178974400143	0.805261228584964	-5.09188245980297
Q8TF39	ZNF483	-0.0410614258615745	3.39880728366931	-1.99622222949138	0.097393157141703	0.714774775611695	-5.09217889005942
Q9H819	DNAJC18	-0.0749808582219996	3.34171282337597	-1.25155397263195	0.261466417558478	0.796869865818046	-5.09238630935512
P50990	CCT8	0.059318379720154	3.31622930808239	1.62042845390331	0.16089551129589	0.751123342519793	-5.09253035126643
Q7Z6L1-2	TECPR1	-0.0683957007728914	3.12258653614218	-0.510328349644102	0.629698412109857	0.912376305253874	-5.09380085849667
Q9GZQ3	COMMD5	-0.338726410195991	3.22934894661914	-1.2285209184546	0.269347706890562	0.797499349267995	-5.09387446220462
Q9UDV7	ZNF282	-0.0475326439734998	3.28662714791	-0.377621601488277	0.719889855700925	0.933884844933632	-5.09393095204076
P21741	MDK	-0.0917664151504515	3.37526529903754	-1.41192195938402	0.212116236455483	0.77771670566293	-5.09406519671387
Q96HD1-2	CRELD1	-0.127970941373967	3.19948122465811	-0.914813768195889	0.398725769160713	0.842233632387697	-5.09419177654005
Q8TF20-2	ZNF721	0.0467727378869134	3.34596658703603	0.312843042298811	0.765951058179433	0.945572857137706	-5.09423416698639
Q8WUM4	PDCD6IP	0.0439518118929595	3.23582044465393	2.22545245755648	0.0718701266505958	0.690707585170939	-5.0943809840553
Q14244	MAP7	0.0732221658325648	3.42170270528127	1.01613690008172	0.352277184565326	0.8254949786149	-5.09440741246064
O95210	STBD1	-0.0839000454063729	3.06339714980328	-1.233520325803	0.267619356041881	0.797304002637856	-5.09456097980448
P42898-2	MTHFR	-0.0749305612476968	3.32254296327232	-1.36152061547217	0.226621082689425	0.784100603281352	-5.09476581431564
Q86UP2-1	KTN1	-0.127265092573231	3.29753463703942	-2.37207059820067	0.0593067911396515	0.667644697400095	-5.09481489971657
Q8TE99-1	ACPL2; PXYLP1	0.0652621519914496	3.3254831350319	0.591986453082799	0.57742701652566	0.900673729633495	-5.09658769328797
O43353-1	RIPK2	0.055727748142163	3.37620621963468	1.56138483664665	0.174054062130234	0.757600745327352	-5.09725864652062
Q9Y282-3	ERGIC3	-0.0754956680140632	3.0928963041526	-1.38513584187552	0.219714400647282	0.781116256610727	-5.09818449820052
Q9BR11	ZSWIM1	-0.061915924274201	3.28027132519134	-0.541210328644204	0.609621340780747	0.906482750579552	-5.09829381247262
Q15637-5	SF1	-0.108189888206812	3.34626626760126	-1.63005096620904	0.158844466356859	0.751123342519793	-5.09895542038763
P07738	BPGM	0.0207088228360544	3.0986874989781	0.167693998575937	0.872834868700984	0.974355902606555	-5.09919069570747
Q6DHV7	ADAL	0.0960991106512855	2.94914588196795	1.00710593558916	0.356231533171097	0.827818080080758	-5.09967853606924
Q9P2B2	PTGFRN	-0.0799540151326413	3.16871539813454	-1.42673471120318	0.208020077985512	0.776986386711222	-5.09976147787222
Q8TBZ8	ZNF564	0.072266535183276	3.3642690985956	0.883469257223715	0.414029272780846	0.854924959883521	-5.10068272356171
Q8TCY9	URGCP	0.065124597858298	3.3084955507431	1.42900101864217	0.207399926837679	0.776986386711222	-5.1013254931368
O75326-1	SEMA7A	-0.0814637732791933	3.3429661735411	-0.56936201059243	0.591644040530171	0.90554186600661	-5.10238345812326
P61225	RAP2B	-0.110839979153373	3.27570741211438	-1.24314404882773	0.264319991694843	0.797304002637856	-5.10301924764651
Q4L235-1	AASDH	0.0736789060242977	3.30839775108548	0.888117429219146	0.411731795599297	0.853500766235561	-5.10319675696414
P10412	HIST1H1E	-0.201771809499228	3.34774557113143	-1.61393669247658	0.162293752835452	0.751123342519793	-5.10336099234573
O95336	PGLS	0.0920552927726918	3.30885339534115	1.66739489897415	0.151123340008393	0.749139109615353	-5.10355168101282
Q9UID6	ZNF639	-0.0663737377597563	3.32328297442815	-1.10535596334577	0.315123324016564	0.809653764854345	-5.10363333708358
O43913	ORC5	0.078554199356604	3.36304263483854	1.6764042107495	0.14931629546803	0.749139109615353	-5.10378256337533
Q9BVV6-3	KIAA0586	-0.0537361651700797	3.33456040449421	-1.57903603757445	0.170015086614632	0.753527293187439	-5.10379739495762
O95235	KIF20A	-0.0328470483229349	3.31026577013788	-2.15995629681978	0.0783600868415337	0.695366842612303	-5.10383849760213
Q13428-4	TCOF1	0.149339588632953	3.34238761869406	1.51231490469493	0.185771703401795	0.7641205515961	-5.10407517038061
Q9Y2G3	ATP11B	0.0975310587362766	2.93219923376887	0.982431920696257	0.367219528072441	0.829107774976977	-5.10409011049954
Q9UK73	FEM1B	-0.0846283850927887	3.26320643132785	-1.72979552894254	0.13903546825132	0.740016586066525	-5.10454178503614
Q15306	IRF4	0.297403184068012	1.15280432635152	1.64754243722004	0.155181174607249	0.749139109615353	-5.10499694583491
O43854-1	EDIL3	-0.0698110312473048	3.42298831574955	-1.27318127937914	0.254253895943232	0.79340068917824	-5.10500825880726
Q92545	TMEM131	-0.125540222723318	3.36579584501533	-1.67214941568476	0.150167045687527	0.749139109615353	-5.10521737800897
Q96SI1-1	KCTD15	0.0722240464089609	3.33337748903049	1.24768485122154	0.262775826400224	0.797304002637856	-5.10646881743047
Q8IY31-2	IFT20	-0.0770481282486865	3.23219931747516	-0.962371375957236	0.376352718162472	0.832175940221092	-5.10656559735201
P25685	DNAJB1	0.160644150010024	3.35091745247481	1.85109897138408	0.118217257163967	0.733441736359969	-5.10708716107176
P31749	AKT1	-0.175566666959484	3.27696104407594	-1.48981539813924	0.191392504804697	0.76773129536073	-5.10710946699592
Q6PCB8	EMB	-0.112216026286329	3.25841869075029	-1.20484342089167	0.277667912598474	0.799305333873119	-5.10721791431664
Q9BQS7-3	HEPH	-0.0989337987320266	3.42241031214179	-1.01313193556951	0.3535889597288	0.826549207507419	-5.10793642089712
Q9BTE1	DCTN5	0.0921617157996371	3.28907042098367	1.23028751177957	0.26873584993375	0.797304002637856	-5.10793864821076
Q9UGL1-2	KDM5B	-0.0530378358506222	3.35408817803282	-1.86447476366601	0.116122090672372	0.732223559156751	-5.10814433365895
Q16644	MAPKAPK3	0.0691985503636834	3.30126714851342	1.5911845677348	0.167287902555896	0.751864550913203	-5.10926798116605
Q8N6T3-1	ARFGAP1	0.0734820428295635	3.33716731982933	1.89506091326051	0.111470940959915	0.726290966137758	-5.11014764888998
P17010-3	ZFX	0.0533002003385081	3.23975223487869	0.374956701684314	0.721760698231415	0.934559616565823	-5.11071733661377
Q9BZE9-2	ASPSCR1	0.0510730865777126	3.34913278437886	1.80904865159537	0.125054993268927	0.733441736359969	-5.11117376524524
O94830	DDHD2	0.215102400193852	3.16115561651785	1.42970009903606	0.20720897972894	0.776986386711222	-5.11118320889126
Q53HC5	KLHL26	-0.0645426557782863	3.36528718105841	-1.26102217602699	0.258286645309287	0.79390101232215	-5.11136876043988
Q6P1Q0-7	LETMD1	0.0964990986968726	3.03113220987773	0.858288274589718	0.42664577839279	0.856417166883696	-5.11145333968121
Q9C0D6	FHDC1	0.0790739542221599	3.43018171201551	1.26952690793341	0.255459953883953	0.793798609233573	-5.11190279308329
Q6P444	FAM54A; MTFR2	-0.0734138120720473	3.30398574208882	-1.05301069294596	0.336503167091007	0.819573804110622	-5.11199401931927
Q8N5M4	TTC9C	0.168073740975577	3.33045031430817	0.872729729606765	0.419374987166923	0.855393507102659	-5.11210021890417
Q7Z3J2-1	C16orf62	0.0669125666649217	3.281796913578	1.69359459317756	0.145926996871636	0.749139109615353	-5.11328927359401
Q9H081	MIS12	0.0706744717777159	3.24818674693667	1.48076276567859	0.193699200473438	0.76773129536073	-5.11388498146394
Q8NHV4-3	NEDD1	0.067996523890191	3.31037196258437	1.63878006698058	0.157005886707813	0.749139109615353	-5.11443904459457
Q13557-11	CAMK2D	-0.0813606188358062	3.25583879081807	-1.21228641931809	0.275028392414751	0.799305333873119	-5.11485036586991
Q7Z4K8-1	TRIM46	-0.0330597037353468	3.38261452877904	-0.280912761473054	0.789070846109936	0.952216154046689	-5.11526933992865
Q8NCF5-1	NFATC2IP	0.0735370430731111	3.35228605236005	1.58600833628387	0.168444693046411	0.753114235459805	-5.11542123331386
Q96N66-1	MBOAT7	-0.0957876630201623	3.3412851972845	-1.0305252324509	0.346051231780922	0.825017911289336	-5.1161529675076
Q9HB20	PLEKHA3	-0.0936354792930181	3.27760033876645	-0.82371003857978	0.444438920699684	0.862787297471654	-5.11627972912556
O96018	APBA3	-0.0821017294517208	3.29950882781782	-0.86667977713794	0.422409430330079	0.855393507102659	-5.11740240944631
Q9NR56-1	MBNL1	0.0754564865332712	2.17752977606822	0.777079773686701	0.469290410808326	0.873060767327738	-5.11762822928046
P41134	ID1	-0.0792108697717973	3.38642717105524	-0.765024371842275	0.475874729880154	0.873539701671012	-5.11844857314937
P53609	PGGT1B	0.0572943185875302	3.29262826717576	1.53360153689745	0.180598795561396	0.7641205515961	-5.11875785959799
P48651	PTDSS1	-0.13665242449954	3.3149426740871	-0.941583380704014	0.386007125327845	0.837276410945781	-5.11893481883156
P07311	ACYP1	0.0790833862148849	3.14195197904049	1.06782023980946	0.33033470880711	0.816471612747471	-5.11913247341228
Q15436	SEC23A	0.0462880598007398	3.31566167927446	1.9345739946997	0.105740587428228	0.722811621274888	-5.11914687805084
Q8IYH5-1	ZZZ3	0.0881746465707283	3.28765964126257	1.65612325116151	0.15341434774783	0.749139109615353	-5.119172008959
Q96I27-2	ZNF625	0.151773728765718	3.38882357325053	1.08169392286126	0.32464202062404	0.812876495505102	-5.12005050032478
Q9Y2Y1	POLR3K	0.05373864118414	3.35138472446566	1.57851216458885	0.170133649103875	0.753617411042108	-5.12011310638545
P54289	CACNA2D1	-0.0772504800957993	3.35705541929625	-1.77097468614777	0.131587350430121	0.734995534891536	-5.12028529547266
P98155-1	VLDLR	-0.103303161583741	3.32144403304097	-1.33815913009918	0.233649379691903	0.787448824294213	-5.12041448482815
Q05193-1	DNM1	-0.0722901008356145	3.14555810944219	-1.15872543026076	0.294522250883532	0.805559563533734	-5.1206063220647
Q9BTT6	LRRC1	-0.0854461862910967	3.29031853748784	-1.1325597601686	0.304473409546762	0.806321739619344	-5.12092081455434
Q8WZA1-2	POMGNT1	0.0846404167815396	3.29858536399175	1.24036148610623	0.265270224117383	0.797304002637856	-5.1210051136243
Q7RTN6-1	STRADA	0.0717279128424094	3.29421626012679	0.760951416665346	0.478114005811125	0.873679076227933	-5.12131943207156
Q9BRK4	LZTS2	-0.0535998594983987	3.33595439172799	-1.57671284896328	0.170541476188652	0.754117697590395	-5.12148479118877
Q9UHD9	UBQLN2	0.062633743594617	3.36485371260443	1.82586097612458	0.122274748755728	0.733441736359969	-5.1219542219483
Q8N2Z9	APITD1; CENPS; APITD1-CORT; CENPS-CORT	0.0859227091162922	3.32987264877164	1.32605212659948	0.237369654350732	0.789594391611883	-5.12251499800162
Q9NWZ3-1	IRAK4	0.0889400766653726	2.66463629796907	1.08269065141705	0.324236228228053	0.812576145870308	-5.12289383092279
Q8NBW4	SLC38A9	-0.0844164935614423	3.35991838901156	-0.958649225995049	0.378067126482764	0.83348591792407	-5.12309158356973
Q5JPI3	C3orf38	0.0707461428382431	3.3527495107996	1.61917627078991	0.161164301246351	0.751123342519793	-5.12351966453624
P01892	HLA-A; LOC100507703	-0.129524691440566	3.30755926657101	-1.37376489687569	0.223015434708921	0.782463362833446	-5.12359597843814
P47712	PLA2G4A	0.0703172077463553	2.49557877902609	1.10486982492247	0.315316485308853	0.809878833374462	-5.12394773981516
O95479	H6PD	0.0643724721000602	3.33923267113511	1.41623074423513	0.210917044346434	0.77771670566293	-5.12421318586733
Q13563	PKD2	-0.112668830815081	3.39877195539894	-0.932190633605514	0.390432995068617	0.839015931866493	-5.12445343865242
Q04656-3	ATP7A	-0.0785450046846157	2.68161375263589	-0.580749457213097	0.584462253555927	0.904012081170537	-5.12505501176966
Q96H79	ZC3HAV1L	0.0617489419196693	2.65827137107173	1.50240503683615	0.18822778084703	0.764699748141227	-5.12517570205902
P46734-1	MAP2K3	0.0830553174758135	3.24265875889816	1.6472761445304	0.155236322278863	0.749139109615353	-5.12527798200886
Q9H8T0-2	AKTIP	-0.0757469141942922	3.30193080439056	-0.676869408931988	0.525988780675728	0.890548392237654	-5.12542057606794
Q9NUQ2	AGPAT5	-0.110553710921998	3.36213185906478	-1.42200837226143	0.209318965751813	0.77771670566293	-5.12564455169715
Q96LA8-1	PRMT6	0.0801468292090182	3.25008361992691	1.10559151688286	0.315029765722555	0.809653764854345	-5.12581102455152
Q5BJH7	YIF1B	-0.0981439187413616	3.28709506503696	-0.929248830720124	0.391827341842387	0.840028174241408	-5.12593260283935
Q96DX4	RSPRY1	-0.103424215513969	3.22880349237945	-1.19290579669916	0.281947814596033	0.799720279871504	-5.12609088999148
O95125	ZNF202	-0.0614047602311728	3.32705117731888	-0.518265713054732	0.624503218977336	0.910160596353632	-5.12616144915321
Q96JB2-1	COG3	0.0524830122832616	3.29309515045679	1.88609516898613	0.11281446788813	0.727089788587402	-5.12620316004833
Q9GZT6	CCDC90B	-0.00484912284424869	3.31175029546924	-0.0341887074175838	0.973936614284925	0.99209243263495	-5.12671090197514
Q8NB50-1	ZFP62	-0.0778440306909357	3.31599251468141	-1.01962545716605	0.350759295107351	0.8254949786149	-5.12683067283703
Q9UGT4	SUSD2	-0.094645335820907	3.38378920493271	-0.919595807976846	0.396430050036082	0.841029022992305	-5.12738739809923
Q9UL25	RAB21	0.087738912105103	3.23639525971372	1.60001570369821	0.165332018576671	0.751123342519793	-5.1276166497542
Q96ES7	CCDC101; SGF29	-0.0753614070752497	3.24394983052636	-1.52336560370946	0.183068860702626	0.7641205515961	-5.12798301046321
P15311	EZR	0.0798013695386288	3.40540007421503	1.93227004000149	0.106066343966069	0.722811621274888	-5.12800362787521
P53384	NUBP1	0.0561186738508258	3.32752366621749	1.39687338160406	0.216354375697595	0.779937206141629	-5.12821882756276
Q12981	BNIP1	-0.10404713694961	3.25995207855775	-1.56482469769217	0.173259771340613	0.756873951976266	-5.12840008081022
Q9NQS3-1	PVRL3; NECTIN3	0.115043539326179	3.31446509682294	1.17933895751846	0.286881775995982	0.803268972788749	-5.12912445695136
O75531	BANF1	0.220757655999487	3.32990492707515	1.32230098661666	0.238533219668084	0.789594391611883	-5.13055553469913
O15540-2	FABP7	0.0778360926530831	3.47514613807083	1.26966072858103	0.255415698549441	0.793798609233573	-5.13099201566829
O75874	IDH1	0.0830744530886393	3.45052665314177	2.50300766267445	0.0500509248114943	0.659777826724716	-5.13218990507852
Q9GZY4	COA1	-0.137737459451523	3.32096090958977	-0.975378746235434	0.370410231806146	0.831691273494799	-5.13247062809487
Q674X7-1	KAZN	-0.0692139190260985	3.24427004133502	-0.63301385808708	0.552184088050872	0.898210912688648	-5.13266968977326
Q14145	KEAP1	-0.0431802436998086	3.36654561269843	-1.81605071036372	0.123889445440533	0.733441736359969	-5.13311522162637
O95613	PCNT	-0.0745485807969163	3.10060020877249	-1.98035261099496	0.0994753465191089	0.716105600093805	-5.13324249589718
Q9H6R4-1	NOL6	-0.0708514848609865	3.32978751582259	-2.01539550252247	0.0949370276184463	0.712000315531558	-5.13349372542062
Q9H8W4	PLEKHF2	0.0587179965616488	3.33990217391748	1.32287915476158	0.238353540159362	0.789594391611883	-5.13351565993029
Q9H009	NACA2	0.0696910237597506	3.28111636084097	0.57259972779068	0.589596759028965	0.905523189547782	-5.13395592270801
Q9Y255	PRELID1	-0.088425902968603	3.35725874574861	-0.862967792436309	0.424279443555461	0.85569713221806	-5.13399777656039
O95271	TNKS	-0.1086003994973	3.3113693492147	-1.26348813838154	0.257464174200461	0.79390101232215	-5.13404212896588
P84157-1	MXRA7	0.0818108456643004	3.03599056537035	1.26060707897246	0.258425323137455	0.79390101232215	-5.13500229848557
P21283	ATP6V1C1	-0.0750892207829073	3.3423751379817	-1.74451250655407	0.136326726557698	0.734995534891536	-5.13506601944706
Q8NF37	LPCAT1	-0.147379585227433	3.35014281915459	-1.74870743700835	0.135564256000767	0.734995534891536	-5.13540330098197
O75781	PALM	-0.0852273960473153	3.05703468947546	-0.793336334738724	0.460515072053574	0.868783657885364	-5.13541215603864
Q6ZNW5	GDPGP1	-0.0502539623263901	3.34182410089745	-0.461824725550654	0.661953684101918	0.921082994869434	-5.13625014253821
Q99598	TSNAX	0.0434691190980684	3.28979341617334	1.96326138882921	0.101768847653997	0.718716301334403	-5.13655069368668
Q15113	PCOLCE	0.0634339083655644	3.23552725886978	0.717193615090376	0.502638915973571	0.879068822536783	-5.13663713026595
Q05639	EEF1A2	0.0817284469375348	2.36551757562789	1.55711818815482	0.175044128178665	0.759151244424374	-5.13757767561497
Q969G5	PRKCDBP; CAVIN3	-0.0744245499689861	3.36666487591965	-0.981233456210234	0.367760124160903	0.829172090510251	-5.13760774607769
P49792	RANBP2	-0.0622087930372461	3.33976306376128	-2.69249639637036	0.0392975916680832	0.653955463216203	-5.13764361253562
A6NFI3	ZNF316	-0.0753852091658464	3.2761083523009	-1.0281429598597	0.347075778156737	0.825017911289336	-5.13784251617101
O00203-1	AP3B1	0.0442462057914385	3.3640271161309	2.06682560881576	0.088658668710801	0.697991490104712	-5.13821892856562
Q5W111	SPRYD7	-0.0670313697210782	3.06903480095478	-0.9607531631217	0.377097298728617	0.832304509737039	-5.13838824573366
P32942	ICAM3	0.0373963727816555	2.5515077897068	0.20624154205852	0.844043087506166	0.966039139714401	-5.14001334584569
Q5SW96	LDLRAP1	-0.0632408123529741	3.32322161060776	-1.30722642733486	0.243261643791328	0.789594391611883	-5.14011400846432
Q53H80	AKIRIN2	-0.0738089573963791	3.29984163142875	-0.796455581829149	0.458844915730459	0.868459233534925	-5.14013983888819
Q8WUB8	PHF10	0.120751340399871	3.30654029388985	1.78143725066217	0.129759069462618	0.734995534891536	-5.14019017596756
Q15287-1	RNPS1	0.0550984535861533	3.30709987423954	1.795911148336	0.127271543952861	0.733441736359969	-5.1407308877439
O75486-1	SUPT3H	0.0522791918541196	3.26580226058511	0.408158461981245	0.69860975252155	0.930100865390833	-5.14083438968616
Q5SRD1	TIMM23B; LINC00843; LOC100652748	-0.152427378779606	3.33862019218649	-1.31965437120069	0.239357291932963	0.789594391611883	-5.14120515351813
O75914-3	PAK3	-0.0943800047486547	3.40245633403119	-0.790362269615852	0.462111580400258	0.869254266116832	-5.14238126218861
Q9UBS9-1	SUCO	-0.13110408871088	3.36214214694201	-1.37480738878027	0.222710899904113	0.782463362833446	-5.14340630493283
Q9NZ01-1	TECR	-0.179932381338459	3.25905647779412	-1.5994297318975	0.165461108821873	0.751123342519793	-5.14402261512042
P54646	PRKAA2	0.0688977258120544	3.210823968306	1.02652250457167	0.347774112104813	0.8254949786149	-5.1444844298377
Q7Z5Y7	KCTD20	-0.061100221724819	3.25336808979314	-1.2407930488955	0.265122648828117	0.797304002637856	-5.14465551977358
Q93075	TATDN2	-0.0743707601177328	3.25550801118184	-0.996649639113676	0.360855025137378	0.828055342855716	-5.14494785693009
O15040	TECPR2	-0.0564341231847602	3.36073771926235	-1.39062360050744	0.218137489018965	0.779937206141629	-5.14585036290131
Q8N9N2-2	ASCC1	0.0739025810878358	3.34538276742987	1.26961294101884	0.255431501409823	0.793798609233573	-5.14630642521893
Q969E8	TSR2	0.0610488553597883	3.33134287425666	1.25147408206745	0.261493395668336	0.796869865818046	-5.14632835846553
Q08345-5	DDR1	-0.0765254311629145	3.38672668758297	-1.57353134386591	0.171264893275647	0.755140380006184	-5.14638874849918
Q9NPD3	EXOSC4	0.0632663945034971	3.32248964229943	1.60481672071579	0.164278016455297	0.751123342519793	-5.14773715006346
O14980	XPO1	0.029892562939457	3.32675659365907	2.45438009936388	0.053294356227706	0.663179035285209	-5.14777993547529
Q8N565-2	MREG	-0.0540518591868552	3.35592147246025	-0.54495841489378	0.60720977095432	0.906482750579552	-5.14873900396553
Q96G21	IMP4	-0.0697442335574667	3.33736262836708	-1.53373498979013	0.180566802852832	0.7641205515961	-5.14893790355288
Q15149-8	PLEC	-0.0915989191713125	3.32782360653918	-0.895091949803133	0.408302812529573	0.850729645334299	-5.15056783309627
Q96BZ8	LENG1	0.074284440742123	3.2673703365384	1.27410816831034	0.253948806309687	0.79340068917824	-5.15072159524931
P18065	IGFBP2	-0.0953938099756564	3.3742136737047	-1.63502044829179	0.157795205628101	0.749139109615353	-5.15178517884361
Q6NSJ5	LRRC8E	0.0689960884456307	3.16607394671385	0.556910972436722	0.599556294644608	0.906165044999182	-5.15263126136767
Q96AE7	TTC17	-0.0464444269387808	3.29486760312319	-0.381661450470839	0.717057895006354	0.933304263005917	-5.15279593947905
Q9H165-1	BCL11A	-0.0237794163439317	3.21656826902409	-0.211944436169016	0.839805071549425	0.965168393733652	-5.15305238827541
P41227-1	NAA10	0.0625805178392331	3.31356345159839	2.02470745461458	0.0937672034265177	0.71036960377837	-5.15312588895727
Q8N4C6-7	NIN	-0.0639351664032113	3.22076881622593	-0.491347975460391	0.642217615659285	0.916157223380074	-5.1533687640599
Q68DH5	LMBRD2	-0.0815524345431964	3.1845723641496	-0.744629873518036	0.487161959305791	0.876261614320858	-5.15339129900946
Q9BYD1	MRPL13	0.0754981583807206	3.33635243172121	1.45653204595404	0.200003283054015	0.769729154961056	-5.15402158387334
P11441	UBL4A	0.0857264126600571	3.25619298176755	1.6680796633742	0.150985243651167	0.749139109615353	-5.15547009150975
A6H8Y1	BDP1	-0.0680458584515724	3.29974611516166	-1.26476642811437	0.257038749395041	0.79390101232215	-5.15569882682559
Q9HCG8	CWC22	-0.0604026256777155	3.33762056993219	-2.07470491325013	0.0877353462257167	0.697991490104712	-5.15606359101171
O75593	FOXH1	0.0669855038358871	3.35454085890602	0.63911609540663	0.548489914559596	0.89764564574018	-5.15671904370713
P29762	CRABP1	0.0722556631997185	3.52096922099357	1.85647676987181	0.117370342155577	0.733441736359969	-5.15763979121457
Q587I9	SFT2D3	0.0797628113918434	3.33046464587363	1.30909241680131	0.24267176489483	0.789594391611883	-5.15830457334573
P48380	RFX3	0.0704243928067938	3.39489940160867	1.39401116280321	0.21716930697956	0.779937206141629	-5.159026102183
Q8IXM6-1	NRM	-0.11559484891303	3.30159033662928	-1.01721713777121	0.351806594538219	0.8254949786149	-5.15918950052536
Q8N4X5-4	AFAP1L2	-0.148396970721321	3.36915844976819	-0.878709664640308	0.416391963044208	0.855091521919864	-5.15937443955288
Q9ULZ3	PYCARD	0.127697625862032	3.44044224361436	1.34658902000366	0.231090547262647	0.785523561630051	-5.16041412704265
Q6P0Q8	MAST2	0.0402595880937269	3.28562029915925	0.278471480718875	0.790848811542975	0.952216154046689	-5.16045415232568
P48454-3	PPP3CC	0.0192878799294497	3.12134600546037	0.146285782048585	0.888923007718643	0.978153227738383	-5.16055913881549
Q9BV81	EMC6	-0.117914550954333	3.3897949259136	-1.10327163915927	0.315952212757275	0.8106974502588	-5.16077259893704
Q96RF0-2	SNX18	0.053562155470246	3.20506413682788	1.39403981390749	0.217161135355895	0.779937206141629	-5.16096281549665
Q9UHD2	TBK1	0.0677627806639684	3.24957661498819	1.9126354499146	0.10888424172602	0.725032462556748	-5.161662463476
Q9NR80	ARHGEF4	0.0662646311666396	3.32193913532251	0.810665262779668	0.451292142893599	0.865939041129588	-5.16183001176288
[truncated: 5,673 more rows]
