# Supplementary material for: Thalidomide promotes degradation of SALL4, a transcription factor implicated in Duane Radial Ray syndrome
Source: eLife journal article supplement (doi:10.7554/elife.38430), 2018-08-01
Supplement: supp [file elife-38430-supp-v1.zip › elife_poa_e38430_Figure_1_source_data_4.csv]

	ID	logFC	AveExpr	t	P.Value	adj.P.Val	B
Q9UJQ4	SALL4	-1.62870032097855	3.23971623904195	-34.0337171342781	4.57669638397774e-08	0.000210974307141989	4.72796282223976
Q96JP5-1	ZFP91	-0.275302019137319	3.38846195349094	-11.974596390181	2.13063196987608e-05	0.0601406384030354	3.0720773019771
Q9BU19-5	ZNF692	-2.24852655067387	3.30541322809629	-33.5502705092805	4.98286034818113e-08	0.000210974307141989	0.0559952957944096
Q17R98	ZNF827	-0.413542701780306	3.5647387844408	-7.35229038493718	0.000331572641651062	0.561551425900238	0.037872775623077
Q9H845	ACAD9	0.0932014470373845	3.32072354045394	4.53767564002123	0.00399215392288021	0.999660365730703	-1.72101822988197
Q96A37-1	RNF166	-0.881160008375737	3.52474079155026	-8.25167991075916	0.000175748154039823	0.372058842102305	-1.74329132554192
Q9NZM3	ITSN2	0.0944137122913906	3.29732141508823	4.35169127789081	0.00487006203718894	0.999660365730703	-1.95773510287949
P55040	GEM	0.166945293962278	3.3239283373667	3.91587159210683	0.00791657134050301	0.999660365730703	-2.06765194966962
P45954	ACADSB	0.0831210065514579	3.34222737962297	3.90562588416199	0.00801028190569284	0.999660365730703	-2.271120713136
Q8WXE9-3	STON2	0.42722448147937	3.15728940746313	3.57460280751187	0.0118179418696619	0.999660365730703	-2.42515040506507
Q99453	PHOX2B	-0.0920894567945057	3.33457341093067	-3.7350701503678	0.009766787459604	0.999660365730703	-2.44253956125261
P12259	F5	-0.313780724172398	3.38190018514836	-3.60961953447251	0.01133256616805	0.999660365730703	-2.50863786085652
P06576	ATP5B	0.0501897453447104	3.33344925723808	4.18254830081197	0.00586078203170246	0.999660365730703	-2.57949129482225
Q92833	JARID2	-0.135229266427199	3.29705351025832	-3.28060008174071	0.0169314393754411	0.999660365730703	-2.78602849311707
Q9HD33-1	MRPL47	0.0805633739635223	3.31905146286163	3.30222800518132	0.0164820600326505	0.999660365730703	-2.96585448647668
P18859-2	ATP5J	0.275445275949782	2.45817473709083	2.97767915821497	0.0248591257754169	0.999660365730703	-3.05420697233984
P51854	TKTL1	0.0980220731186255	3.28008234357716	3.28609833850468	0.0168159369091219	0.999660365730703	-3.06715138613803
Q10713	PMPCA	0.0791781731791008	3.33392322396439	3.43683348894008	0.0139636269526777	0.999660365730703	-3.07673393257014
Q02241-1	KIF23	-0.0965998571450044	3.3478015504166	-3.33884489697003	0.0157508110724647	0.999660365730703	-3.13278081758577
Q03252	LMNB2	-0.0396807262824271	3.3354866567503	-3.52138507899731	0.0126002710800103	0.999660365730703	-3.17514739639618
O15060	ZBTB39	-0.168094628967321	3.39366973257175	-2.80477009477981	0.0311338682443955	0.999660365730703	-3.26695475218418
Q12849	GRSF1	0.0517168658069518	3.32998628565958	3.25992365490678	0.0173736467542407	0.999660365730703	-3.33526287877438
P38117	ETFB	0.0778342243571506	3.31902706276163	3.14779894046572	0.0200030007235548	0.999660365730703	-3.48492769735166
Q9H857-2	NT5DC2	0.0960911451566756	3.30410463653091	2.90714168801514	0.0272362594415579	0.999660365730703	-3.49469977554415
Q5TEC3	ZNF697	-0.239556295773788	3.34080739618883	-2.59413811207731	0.0411696792790732	0.999660365730703	-3.50820314022751
P62633-3	CNBP	0.370407979795234	3.33025479941767	2.53564698072696	0.0445324998935379	0.999660365730703	-3.55836586235202
Q96EP5	DAZAP1	-0.155844138197548	3.34271688549889	-2.6523840587212	0.0380879988233092	0.999660365730703	-3.5755669025167
Q9C005	DPY30	0.431888263320446	3.08381116061459	2.46991410872974	0.0486618148642786	0.999660365730703	-3.59845528647732
P55084	HADHB	0.0677721851328097	3.33605000093666	3.27286681024815	0.0170953689203229	0.999660365730703	-3.63522584359482
Q6P161	MRPL54	0.100229755983438	3.33159714006116	2.43462651806387	0.0510435218183764	0.999660365730703	-3.68637389910298
Q9UBP9	GULP1	0.0787241291654283	3.30455551833489	2.61531564390954	0.0400195616550321	0.999660365730703	-3.69645914119641
Q6AHZ1-1	ZNF518A	-0.145372651036774	3.32408320740573	-2.40321065903597	0.0532671648707991	0.999660365730703	-3.70930478543363
Q9UF56-1	FBXL17	-0.0839788707691383	3.31118962889817	-2.50775152379848	0.0462377302878028	0.999660365730703	-3.72926917415956
Q6ZMZ3	SYNE3	-0.263385604293789	3.29700863873236	-2.55890509306626	0.0431616736849336	0.999660365730703	-3.73687728573959
A8MTY0	ZNF724P; ZNF724	-0.132443287663391	3.33364090985975	-2.36551372043317	0.0560702772801058	0.999660365730703	-3.7988009430139
Q96I99-1	SUCLG2	0.0603890514797483	3.31557740230177	2.69040868525209	0.0362095786426069	0.999660365730703	-3.80970109608381
P51157-1	RAB28	-0.150624189349634	3.49139414577309	-2.42795424714509	0.0515074937714911	0.999660365730703	-3.81477333143907
P16219	ACADS	0.0984015604670223	3.34853632749293	2.4080419562649	0.0529186849594867	0.999660365730703	-3.87363426372251
Q96ND0	FAM210A	0.117452930072682	3.31990549110874	2.23140543477178	0.067356434493394	0.999660365730703	-3.89637016803389
Q8IXM3	MRPL41	0.0880038883527338	3.33063235385319	2.27215951521311	0.0636961574107558	0.999660365730703	-3.89973445794761
P36542-1	ATP5C1	0.064904159454753	3.33326823595198	2.82648962683135	0.0302592848239168	0.999660365730703	-3.90240553571993
Q9NVV4	MTPAP	0.0900589708461612	3.30735633410499	2.59475012161236	0.041135953200704	0.999660365730703	-3.94718481678318
O75052-3	NOS1AP	0.13703057074405	3.27951906365776	2.40864189133359	0.0528755791904756	0.999660365730703	-3.96191350428304
Q9Y3B7-1	MRPL11	0.0872080024482748	3.31748237917822	2.62341086863895	0.039589000154321	0.999660365730703	-3.96495110115532
Q15935	ZNF77	-0.214097649290138	3.32554639257239	-2.08837512639783	0.0820134323457724	0.999660365730703	-3.96926675383904
Q8WTP8-2	AEN	-0.0708805636930124	3.33853665609556	-2.29533917326635	0.0617070271270326	0.999660365730703	-3.99201553535031
P13682	ZNF35	-0.188325588573061	3.33745219713765	-2.15099443940093	0.0752302140713214	0.999660365730703	-3.99431372676435
Q8N4Q0	ZADH2	0.139606313412428	3.3228243902218	2.09537747171911	0.0812247992169559	0.999660365730703	-3.99538533841802
Q5FWF5-1	ESCO1	-0.103362917480967	3.32756625209104	-2.29645869481422	0.0616126081707645	0.999660365730703	-4.01457427810188
Q9NYW8	RBAK	-0.192189331635555	3.34955215266725	-2.2805887196875	0.0629652140416607	0.999660365730703	-4.01935524914297
Q9NQZ8	ZNF71	-0.21732435204685	3.34875329287628	-2.11599263834601	0.0789477348340831	0.999660365730703	-4.02128966149476
O43615	TIMM44	0.0806514754797318	3.3196806694755	2.79976815878586	0.0313391114268355	0.999660365730703	-4.02925918312099
O43805	SSNA1	0.148891374366997	3.21860917754589	2.15552002136276	0.0747628475554403	0.999660365730703	-4.0328697950948
Q9UHL0-1	DDX25	0.116771243658338	3.27307220421641	2.16140391806014	0.0741596636835124	0.999660365730703	-4.03908480083282
Q9NV79	PCMTD2	-0.119072743232548	3.30331025687074	-2.18216604173711	0.0720709575609312	0.999660365730703	-4.04715197646019
Q9NWU5	MRPL22	0.0798740555482962	3.32696626350705	2.20349481180151	0.0699882967187878	0.999660365730703	-4.05904223630192
O95182	NDUFA7	0.0785850902657722	3.34882515113614	2.42838324378734	0.0514775294816494	0.999660365730703	-4.07692252880802
O60507	TPST1	0.100644065799321	3.32270676882723	2.04614385175277	0.0869381001776941	0.999660365730703	-4.0882799504651
Q15063-1	POSTN	-0.219510330673894	3.3592021105393	-1.94510761124836	0.099973361885369	0.999660365730703	-4.11205961273525
P62330	ARF6	0.0976531850546424	3.31647967731348	2.09621418298178	0.0811310848529596	0.999660365730703	-4.11286526042569
O60925	PFDN1	0.103478891171813	3.27274925408284	2.38827735342822	0.0543596056143329	0.999660365730703	-4.12034866187027
Q6ZVD8-1	PHLPP2	-0.122073292892537	3.29925441234406	-1.91741091781618	0.103879028046788	0.999660365730703	-4.12708218854979
Q9UBC1-1	NFKBIL1	-0.124498198122424	3.3044328215452	-1.91636950359503	0.104028830525999	0.999660365730703	-4.14194736755074
Q9P0M9	MRPL27	0.0920224687390162	3.32490461820671	2.17904587196125	0.0723809430511152	0.999660365730703	-4.14942302310813
P53680	AP2S1	0.106741219840138	3.29215452638825	2.09770457004663	0.0809644302608121	0.999660365730703	-4.16200768142617
Q9Y5U2-1	TSSC4	-0.0733676662390568	3.32310385992948	-2.17133751449364	0.0731526608589704	0.999660365730703	-4.16294124338709
Q6IN85	SMEK1; PPP4R3A	0.0565689688601881	3.3029419435094	2.62408329035723	0.0395534585738525	0.999660365730703	-4.18436622676994
Q9BYT8	NLN	0.0368608241663908	3.325041886866	2.73916417307751	0.0339447511714515	0.999660365730703	-4.20221830946474
O60641-4	SNAP91	0.0684210784134494	3.31868261261354	2.23040067662348	0.0674493805419465	0.999660365730703	-4.20284216550703
Q15811	ITSN1	0.173428487612242	3.26142877301958	2.32568190888182	0.0592004604195804	0.999660365730703	-4.2028862024849
Q92506	HSD17B8	0.0893437897121505	3.3262195754371	2.06429159057385	0.0847859687726225	0.999660365730703	-4.20748871698726
Q9UJZ1	STOML2	0.0724638951794551	3.34700795164486	2.4182153900492	0.0521926833092771	0.999660365730703	-4.2413481684232
Q6NZ36-2	C1orf86; FAAP20	-0.102248223200273	3.34213479621761	-1.86829398661536	0.111184397413677	0.999660365730703	-4.2435939541212
Q9Y5K6	CD2AP	0.0416064685880358	3.31827733525438	2.58507763277858	0.0416724297362899	0.999660365730703	-4.26867118835812
O95059	RPP14	0.111642789359997	3.32202289355463	1.97777599238246	0.0955558081203919	0.999660365730703	-4.27440478184055
Q96I59	NARS2	0.0832621183691001	3.32070766279029	2.21059754986453	0.0693086132835332	0.999660365730703	-4.28701492755734
P55809	OXCT1	0.0674048323860654	3.32628900778905	2.41575054128398	0.052367615352438	0.999660365730703	-4.29401604868363
Q12931	TRAP1	0.0553048177799255	3.33225560294552	2.82426282494861	0.0303477228775023	0.999660365730703	-4.29763959262297
Q8N5U6-2	RNF10	-0.0819352756412143	3.33089127605757	-1.97899653601451	0.0953946264064858	0.999660365730703	-4.30015156627344
Q96BR6-1	ZNF669	-0.137140422632103	3.34392391818824	-1.86800979247012	0.111228123584538	0.999660365730703	-4.30660889293655
Q9H116	GZF1	-0.121187519385184	3.39349072802953	-2.07724990951768	0.0832825098435568	0.999660365730703	-4.30712203490218
O14561	NDUFAB1	0.250909243554261	3.23676251586844	2.10987052506509	0.0796170578989126	0.999660365730703	-4.31240172086826
A2VDJ0-5	KIAA0922; TMEM131L	-0.0684111087810836	3.33667038862635	-2.03923786694589	0.0877715960027512	0.999660365730703	-4.33283770094461
O43763	TLX2	-0.140078245552049	3.318625005518	-1.65479551200158	0.149294455147985	0.999660365730703	-4.33576144397457
Q96PU5	NEDD4L	0.0572794608492504	3.31604129724898	2.19463330501721	0.0708459417624033	0.999660365730703	-4.33597246856698
P08253	MMP2	0.0852079972225892	3.30359619438179	1.82300043598681	0.11837319559962	0.999660365730703	-4.34426935259653
O95782	AP2A1	0.073634039904762	3.29206505940582	2.44270597789208	0.0504875763532963	0.999660365730703	-4.34800842171711
P37235	HPCAL1	0.0832848659801356	3.29599785963629	2.08872928722362	0.0819733581684914	0.999660365730703	-4.36459564924767
Q96EF0-1	MTMR8	-0.154534565212065	3.31799339672004	-1.58817640479373	0.163590956362595	0.999660365730703	-4.36926169814645
O43829	ZBTB14; ZFP161	-0.106520825314984	3.32674367431705	-2.13305078948183	0.0771130225069558	0.999660365730703	-4.37018504167857
Q9Y3C5	RNF11	0.142477584189006	3.27946573569531	1.64968677110698	0.150346935258286	0.999660365730703	-4.3710236726301
Q96P71-1	NECAB3	-0.173383502186281	3.25814482233929	-1.57507838866972	0.166551468929976	0.999660365730703	-4.3853751509689
Q8WUW1-2	BRK1	0.0982654683526805	3.23164931776448	1.97411089708835	0.0960414633048929	0.999660365730703	-4.38723783769613
Q8WZ82	OVCA2	-0.113575403013969	3.33058080524163	-1.75992676240743	0.129154533162116	0.999660365730703	-4.4001151745307
Q8N442	GUF1	0.0661141993197317	3.31374761157063	2.1713347508361	0.0731529390549528	0.999660365730703	-4.40331888067763
Q9UQF2	MAPK8IP1	-0.0658494477854022	3.33149208090884	-2.00751431219495	0.0917057969251906	0.999660365730703	-4.40397305227202
Q5U5X8	FAM222A	-0.137413188154334	3.34063269707661	-1.56385253585678	0.169129225863425	0.999660365730703	-4.40423884336893
Q16864-2	ATP6V1F	0.0876934832815652	3.29887500686925	1.95756055989581	0.0982656815576891	0.999660365730703	-4.40768442931905
Q13415	ORC1	-0.0937447728119393	3.32604642484764	-1.94835344933987	0.0995254042845849	0.999660365730703	-4.44699548294862
P15924-1	DSP	-0.268159575797317	3.31469787803645	-1.56359171045014	0.169189565473725	0.999660365730703	-4.46102525988527
P23769-1	GATA2	-0.0645931959620159	3.34784541066648	-2.03866677538645	0.0878408844410114	0.999660365730703	-4.46424747145755
P42765	ACAA2	0.0569210630893767	3.33316215899311	2.42541894259623	0.0516849529884058	0.999660365730703	-4.46763333300155
Q13105-2	ZBTB17	-0.143478449261038	3.33191446224195	-1.74545757109506	0.131760605051232	0.999660365730703	-4.47227344760479
Q9Y2R4	DDX52	-0.0766485279578449	3.31868171909429	-1.98400136942597	0.0947365647678612	0.999660365730703	-4.47541174654623
Q9NUE0	ZDHHC18	-0.172383826207435	3.28614289513479	-1.48289070854271	0.188865029921989	0.999660365730703	-4.47568421751054
A1L170-2	C1orf226	0.0891577497919567	3.27560115656619	1.88582240788647	0.108520292687232	0.999660365730703	-4.4847292775469
Q14587-1	ZNF268	-0.188941402850229	3.28875581697344	-1.39346490191255	0.213143796491899	0.999660365730703	-4.48626211189884
Q15697-1	ZNF174	-0.0927914719612744	3.33243145180057	-1.60756632025186	0.15930010847877	0.999660365730703	-4.48945115149644
O15217	GSTA4	0.0887853303737394	3.31231341089171	1.98186100787162	0.0950174282561938	0.999660365730703	-4.49116611144952
Q96SW2-1	CRBN	0.160683903950636	3.28203430864467	1.90258554936562	0.106032070652028	0.999660365730703	-4.49257180005388
Q8WVR3	C7orf43	-0.189269631684115	3.26773972232267	-1.36898696196178	0.220271100531333	0.999660365730703	-4.49808969515001
P05166-2	PCCB	0.057524395644457	3.33354644514793	2.12301628094023	0.0781869402910329	0.999660365730703	-4.49912155715342
Q96E11	MRRF	0.0681954663674092	3.32226924232068	1.92700806156916	0.102508654360762	0.999660365730703	-4.5059456650277
Q9UL54-2	TAOK2	0.109580077866815	3.31712581355335	1.5314305084476	0.176787715554052	0.999660365730703	-4.50860150172582
P61925	PKIA	0.130012816158247	3.27123386048207	1.50005533924543	0.18450866771217	0.999660365730703	-4.50898574176131
Q99549	MPHOSPH8	0.0363971597365621	3.31403031426191	2.28214170524998	0.0628314997394574	0.999660365730703	-4.50978034431085
Q8NDX5-7	PHC3	-0.110858447856159	3.33700720934651	-1.48514412504413	0.188287695363024	0.999660365730703	-4.51118671808841
Q9UK33	ZNF580	-0.125376378844986	3.32774763790582	-1.57419804131747	0.166752266099802	0.999660365730703	-4.51268762873214
Q9H336	CRISPLD1	-0.123576310876991	3.34267036130138	-1.49560653624555	0.185628673652686	0.999660365730703	-4.51515109980189
Q8N4N8	KIF2B	-0.109337794540566	3.34781515204405	-1.47404446468577	0.19114744485519	0.999660365730703	-4.51630746849314
O14523	C2CD2L	-0.134371923106446	3.31024405319987	-1.39693935471846	0.21214933285381	0.999660365730703	-4.52398094805452
O43361	ZNF749	-0.10473890634642	3.35720379240228	-1.50307364734698	0.183752395181947	0.999660365730703	-4.52419306493146
Q5JVF3	PCID2	0.0601187647939466	3.2996702372525	2.33017878313046	0.0588381116621185	0.999660365730703	-4.52436619342248
Q9HB19	PLEKHA2	-0.0859973386865948	3.34375871247011	-1.57305047879769	0.167014356919005	0.999660365730703	-4.53794372810752
Q9UNH5-2	CDC14A	0.152614339903988	3.28513260946065	1.36009918647967	0.222912050166764	0.999660365730703	-4.54386341957551
Q96JF6	ZNF594	-0.156455805111935	3.3032778090683	-1.32373126273599	0.234018841352503	0.999660365730703	-4.54574746367205
Q6IQ19-1	CCSAP	-0.106551987598591	3.35797782882993	-1.45680561987978	0.195669029091426	0.999660365730703	-4.54716624708883
Q5T6S3-2	PHF19	-0.125861497461369	3.30603546031489	-1.31937802408952	0.235381098878078	0.999660365730703	-4.55715516058454
P23771-2	GATA3	-0.0938195112753224	3.34346610085173	-1.91113540339937	0.104785011607591	0.999660365730703	-4.56083858676974
P19532	TFE3	-0.126899016593624	3.3249394886607	-1.29842351107879	0.242038028391114	0.999660365730703	-4.56663101331235
Q9HCI6	KIAA1586	-0.0496237754413584	3.31851766183813	-1.95462753109355	0.0986652302199987	0.999660365730703	-4.56690856465279
Q5VU97-1	CACHD1	-0.115830901335627	3.33642242170617	-1.60953293563116	0.158870958150381	0.999660365730703	-4.56726907511345
Q8NB25-1	FAM184A	-0.157781440600866	3.31935108761133	-1.28107592726808	0.247675292844761	0.999660365730703	-4.56757399903573
Q13398-8	ZNF211	-0.115594200507399	3.34042391924257	-1.50061727791263	0.184367647261719	0.999660365730703	-4.57702112079458
Q8N5I4	DHRSX	-0.127122918224088	3.34392961281405	-1.32736229958761	0.232887988799777	0.999660365730703	-4.58711937770113
Q765P7	MTSS1L	-0.110965084921416	3.33010550749245	-1.49373231585023	0.186102415584111	0.999660365730703	-4.59012739902056
P51649-2	ALDH5A1	0.0714127062766272	3.33320101865405	2.01639432505067	0.0905868616251022	0.999660365730703	-4.5927134384824
Q7L622	G2E3	0.090028594762583	3.31354285157665	1.48376933555818	0.18863972620681	0.999660365730703	-4.59673820906457
Q9HC16	APOBEC3G	-0.0834462143772869	3.23983861302287	-1.49571489796254	0.185601317803677	0.999660365730703	-4.60105076066861
Q13023	AKAP6	-0.0501382766449651	3.32529431614921	-1.86837649997573	0.111171705094473	0.999660365730703	-4.60388686435203
P43251-2	BTD	-0.186249658288992	3.32169318892539	-1.08676446786337	0.319058119337206	0.999660365730703	-4.60647497663275
P10073	ZSCAN22	-0.131627362931987	3.36059555915664	-1.33201055494114	0.231447486345962	0.999660365730703	-4.60835508793797
Q99581	FEV	-0.0954055295915286	3.31248389172662	-1.75579803503655	0.12989297738963	0.999660365730703	-4.61009781590997
Q8NCA9	ZNF784	-0.103087295931123	3.31355557448646	-1.29896685934767	0.241863317939041	0.999660365730703	-4.61042065545575
Q9UHA4	LAMTOR3	-0.100311381977073	3.33756695721347	-1.80850627918854	0.120769426116608	0.999660365730703	-4.61117630676477
Q8N3E9	PLCD3	-0.0871558424568702	3.26749755759838	-1.44795970320275	0.198027512258144	0.999660365730703	-4.61544302279971
Q9H706	FAM59A; GAREM; GAREM1	-0.196659550661623	3.2934145810365	-1.02736013151401	0.34406210421815	0.999660365730703	-4.62236414195994
Q9P0T4	ZNF581	0.156326354085271	3.32933953133985	1.09148094816651	0.317138742536356	0.999660365730703	-4.6226110528663
O75820-1	ZNF189	-0.135116237883886	3.38176088160102	-1.21896624039486	0.268818907011754	0.999660365730703	-4.62549366215052
Q9BPU9	B9D2	-0.210980676833142	3.27844268802044	-1.00641289008711	0.353249522957668	0.999660365730703	-4.6275194993703
Q99575	POP1	0.0443034930502272	3.30836652413037	2.36458646750506	0.0561411434177261	0.999660365730703	-4.6277545679008
O94844	RHOBTB1	0.186492497563364	3.2833235807935	1.45282096158825	0.196728176857297	0.999660365730703	-4.63302006002052
Q5T2R2-1	PDSS1	0.0749292471181092	3.3121582337782	1.80115907290145	0.122002317422901	0.999660365730703	-4.63672293808773
Q99622	C12orf57	0.139458833674256	3.27305955723963	1.57364517238413	0.166878486605067	0.999660365730703	-4.6368069813976
O75616-1	ERAL1	0.0810519108432109	3.32840689196357	2.09966666273921	0.0807455630103312	0.999660365730703	-4.639666775879
Q96BV0	ZNF775	-0.173149456217444	3.3045988003152	-0.947317720551604	0.380225209604432	0.999660365730703	-4.64019310540449
Q8N3J2	METTL4	-0.0853116770994008	3.31453333925423	-1.38586036251101	0.21533523099409	0.999660365730703	-4.64086406508846
Q9NW61	PLEKHJ1	-0.142965130505661	3.27925738596402	-1.18537252560175	0.280897038852901	0.999660365730703	-4.64277840055349
Q9H3W5	LRRN3	0.121484147528829	3.31239287581837	1.18608360639321	0.280636614846646	0.999660365730703	-4.64288882597705
P17014-1	ZNF12	-0.202563526451313	3.31627693382911	-1.14960473879641	0.294266128796686	0.999660365730703	-4.64454343708383
O00748	CES2	-0.105796133924057	3.32504701326376	-1.30947166723522	0.23850755821676	0.999660365730703	-4.6488714316226
Q5M7Z0	RNFT1	-0.145398844206695	3.34131716656936	-1.05760523187419	0.331138685334949	0.999660365730703	-4.6520668590732
Q6QNY0	BLOC1S3	-0.0971442238094857	3.33312390484101	-1.44848255794935	0.197887381874434	0.999660365730703	-4.6521484662913
P53805	RCAN1	-0.119626756368323	3.31119038434669	-1.3172363313331	0.236053899040537	0.999660365730703	-4.65368847887354
Q8WWL2-1	SPIRE2	-0.154818289479772	3.295290967045	-1.0290734662456	0.343319243443584	0.999660365730703	-4.65646978961356
Q969W3-2	FAM104A	-0.147113590575234	3.34641221391826	-1.00350728525866	0.354539317074644	0.999660365730703	-4.65902402487703
Q9UKY4-1	POMT2	-0.14878858584951	3.30497628731189	-1.15696643117714	0.291471063360649	0.999660365730703	-4.65907838721572
Q16836-2	HADH	0.0753883198863257	3.33892980324639	2.14334342208109	0.0760271886318571	0.999660365730703	-4.65981420544157
Q8IUG5-1	MYO18B	-0.178079881045083	3.32840554846698	-0.581206026954877	0.582362481370571	0.999660365730703	-4.66215195712102
Q96PE3-3	INPP4A	-0.043780907530905	3.32289551557975	-1.95232375130685	0.098980205616964	0.999660365730703	-4.6655859454086
Q9Y3V2-1	RWDD3	0.0826168625152394	3.31764916492366	1.47193364751165	0.191695833392782	0.999660365730703	-4.66590276070327
Q8IVS8	GLYCTK	0.113227899593765	3.31115991304181	1.17452110965917	0.284897028466812	0.999660365730703	-4.66719277666105
O14709	ZNF197; ZNF660-ZNF197	-0.159811235410574	3.31700168835105	-1.18620448012118	0.280592367061492	0.999660365730703	-4.67108207477193
Q16854	DGUOK	0.101793178245309	3.32195123107489	1.45055529111361	0.197332769752979	0.999660365730703	-4.67374811884459
Q99704	DOK1	-0.0953371375430743	3.3150508148152	-1.53036056643466	0.177045938488658	0.999660365730703	-4.67462526403051
P78364	PHC1	-0.0783764887518592	3.35028899244098	-1.98502009085255	0.094603180105223	0.999660365730703	-4.67838685145031
O15304	SIVA1	-0.12772938316574	3.34584401240984	-1.32370257438566	0.234027795629494	0.999660365730703	-4.67849768219803
Q13243-1	SRSF5	-0.0839323284671379	3.3126386023091	-2.02835748709805	0.0891012657297272	0.999660365730703	-4.67945846200627
P61812-2	TGFB2	0.100623870575904	3.32601203754019	1.21689648157946	0.269549846174259	0.999660365730703	-4.68187403559005
Q5CZA5	ZNF805	-0.148848617231198	3.31790460828269	-1.02572149951564	0.344773790391035	0.999660365730703	-4.68216596331884
Q13642	FHL1	0.145930164286505	3.32021213823897	0.848467106680648	0.42887826165693	0.999660365730703	-4.6830071360028
P21912	SDHB	0.0621975671505615	3.34534590144494	1.94773294469497	0.0996108838152824	0.999660365730703	-4.68461030005056
Q14520-1	HABP2	-0.343979655729222	3.39754044084433	-1.35139875012376	0.225525042164318	0.999660365730703	-4.68574472467879
Q6NX49	ZNF544	-0.12272877850638	3.32193244686082	-1.25478082371762	0.256441600359307	0.999660365730703	-4.68847077471413
Q96EK2-3	PHF21B	-0.143696592406491	3.33495416402241	-1.12444122403232	0.303992114354421	0.999660365730703	-4.68898930669791
Q9H9G7	AGO3; EIF2C3	-0.0544325197191213	3.34710812941549	-1.8155164802006	0.119604549095534	0.999660365730703	-4.68935271622027
Q9H6N6	MYH16	-0.0464289101996153	3.16778405730382	-0.118658860667721	0.909437337537335	0.999660365730703	-4.68957434899147
O75953-5	DNAJB5	-0.0765380544797197	3.35651990707396	-1.68672551587164	0.142875606732123	0.999660365730703	-4.68989299936702
O15370	SOX12	-0.0956376451977211	3.33329776702851	-1.4112765538591	0.208090400365753	0.999660365730703	-4.69034687220542
Q9NVA1	UQCC; UQCC1	0.0847556606502984	3.32358203705042	1.57892260789998	0.165677332956206	0.999660365730703	-4.69174409180925
Q8TB37-1	NUBPL	0.0577988165227979	3.33567768368917	1.80615914767711	0.121161942719577	0.999660365730703	-4.69179517029539
Q9Y2A4	ZNF443	-0.141159285347694	3.29045871538879	-1.18394939733964	0.281418864300405	0.999660365730703	-4.69522177298379
P36406-1	TRIM23	-0.0963689453789516	3.30854008344179	-0.365524790140127	0.727320526628888	0.999660365730703	-4.69591201101007
Q6ZT21-1	TMPPE	-0.135964108511762	3.27806841757357	-1.13727246997026	0.298999325065263	0.999660365730703	-4.69628072344981
P52849-1	NDST2	-0.121502876249223	3.32406200004817	-1.10509269399077	0.311653146504848	0.999660365730703	-4.70278330204036
Q13011	ECH1	0.0437182734271704	3.33818582622165	2.07051151700966	0.084060894817745	0.999660365730703	-4.7033415326126
Q9H0X9	OSBPL5	-0.159287353653603	3.31462683933724	-0.934985101172596	0.386053063162356	0.999660365730703	-4.70422372263909
Q8NFZ4	NLGN2	0.116491510115233	3.30351845772699	0.537085848374039	0.610624084471597	0.999660365730703	-4.70447517475103
O75123	ZNF623	-0.101164709140401	3.31228313562711	-1.62952451993172	0.154570726397183	0.999660365730703	-4.70471404108498
Q9BRJ6	C7orf50	-0.0853491165483116	3.32329857328818	-1.78002599316922	0.125618066006632	0.999660365730703	-4.70743276578937
Q8TAA5	GRPEL2	0.0680672297412746	3.31388391555368	1.70316655027332	0.13967545671794	0.999660365730703	-4.70882585737334
Q86V87	FAM160B2	0.13018650214537	3.28543514628163	1.00484401134094	0.353945479034471	0.999660365730703	-4.70935874410217
P50443	SLC26A2	-0.134800141322287	3.29973349542573	-1.14940846503506	0.294340959748042	0.999660365730703	-4.71021016802897
Q5SQ80	ANKRD20A2	-0.0806947767236886	3.33498097165701	-1.50199917007207	0.184021285158743	0.999660365730703	-4.71111769475644
O15535-2	ZNF193; ZSCAN9	-0.120887342723818	3.37831266219654	-1.01728871092797	0.348455103215616	0.999660365730703	-4.71321737913258
Q6ZUJ8	PIK3AP1	-0.117676414898234	3.27702897703344	-0.944942796196394	0.3813421491258	0.999660365730703	-4.7134860102551
Q9P244	LRFN1	-0.120475983975194	3.31806141636772	-0.742629807656231	0.485887029977896	0.999660365730703	-4.71496458895047
Q9NXC2-1	GFOD1	-0.114091201400553	3.33103051375385	-1.39433490357234	0.212894384746717	0.999660365730703	-4.71529169039597
Q8N6M3	FITM2	-0.140910252008293	3.31564062552645	-1.16064050801761	0.290084565070449	0.999660365730703	-4.71824882266989
Q9H7H0-3	METTL17	0.07295886833905	3.30604775918804	1.60918647109848	0.158946482627773	0.999660365730703	-4.72109740314158
Q6ZSZ6	TSHZ1	-0.00914262113863344	3.30959593043785	-0.0383803121181881	0.970635625663869	0.999660365730703	-4.72215352687051
O43556-4	SGCE	0.112636820630405	3.26525529154666	1.09234574002895	0.316787855844626	0.999660365730703	-4.72230640056545
Q9HBD1-1	RC3H2	-0.05299182183794	3.32230179936805	-1.76136839815174	0.128897659009568	0.999660365730703	-4.72240180110044
P07203	GPX1	0.0591331436414275	3.30426782785082	1.94870393524226	0.0994771546035463	0.999660365730703	-4.72478689518755
O94900	TOX	0.0996342180632275	3.31908245823699	1.15890457981464	0.290738956777184	0.999660365730703	-4.7252689151671
Q7Z340	ZNF551	0.106840735240283	3.18474618651623	0.247921439062679	0.812501778426938	0.999660365730703	-4.72573915381459
Q8N511	TMEM199	-0.107925508774635	3.31396397132856	-1.28949249411683	0.244925864542402	0.999660365730703	-4.7261921943187
Q96M11	HYLS1	-0.0222096208349406	3.33927952969977	-0.0961649787581006	0.926536251632485	0.999660365730703	-4.72655220033755
Q96AY2-2	EME1	-0.0841689780139465	3.328780373264	-1.50428700550484	0.183449191877167	0.999660365730703	-4.72704257769897
Q9Y253-1	POLH	-0.0760452269201257	3.33212529922076	-1.37461640917937	0.218613047285518	0.999660365730703	-4.72846658422915
Q8WUU4	ZNF296	-0.0404817161317328	3.32083162498931	-0.19181207042033	0.854246808103538	0.999660365730703	-4.72917438244949
P21802-11	FGFR2	-0.113665345854149	3.33022730468536	-0.566198069004613	0.591888975760361	0.999660365730703	-4.73012185462169
Q8IUX7	AEBP1	-0.126782409894401	3.21725966812326	-0.565722254444602	0.592192485811473	0.999660365730703	-4.73089928529208
Q8N1S5-1	SLC39A11	-0.214769386711583	3.31985185648215	-0.815561439839957	0.446059671601528	0.999660365730703	-4.73154397565164
P40205	MYCNOS	-0.0829032270673332	3.31779081513287	-1.36589326052499	0.221187142665317	0.999660365730703	-4.73176422241759
P49821	NDUFV1	0.0561213461205806	3.32743249272028	2.08654703806596	0.0822206033697949	0.999660365730703	-4.73210729548307
P11362-21	FGFR1	-0.0423608399309311	3.33288492442477	-0.197274950983326	0.850157092211451	0.999660365730703	-4.73539513998387
Q9GZP9	DERL2	-0.132305139589027	3.30198082477305	-1.27062876000935	0.25112602268741	0.999660365730703	-4.73605988453911
Q7Z5H3-2	ARHGAP22	0.121264950822787	3.31388848780383	1.01086580887826	0.351280172184972	0.999660365730703	-4.73707289923196
O75030	MITF	-0.10347268740474	3.32530971269497	-1.16321388702426	0.289116788404659	0.999660365730703	-4.73720846340714
Q5JU69-1	TOR2A	-0.102983959218207	3.32830329719696	-1.08402185093115	0.320178649246375	0.999660365730703	-4.73733368391231
Q8NDW4-1	ZNF248	-0.0875861759693822	3.32850003906479	-1.15192371798158	0.293383220589934	0.999660365730703	-4.73771539586124
O95198-2	KLHL2	-0.120489396358897	3.33182403650748	-0.931504279409739	0.387710397125146	0.999660365730703	-4.73824057212827
Q5TB30	DEPDC1	-0.0992692628920937	3.31769047008663	-0.528165657935778	0.616431000891315	0.999660365730703	-4.73878002407905
P50607-2	TUB	0.0633250808300238	3.32748169974737	1.54593503792442	0.173321962282575	0.999660365730703	-4.74225560629915
O14717-1	TRDMT1	-0.102253996469751	3.3134004492844	-1.43330893293926	0.201991512188891	0.999660365730703	-4.74320580089782
Q8TF30	WHAMM	-0.125134515973577	3.28531754653756	-0.731632130654169	0.492099967914126	0.999660365730703	-4.745608250964
O60673	REV3L	-0.0666091852134446	3.31494911067238	-1.64710613526559	0.150881297200118	0.999660365730703	-4.75085108141081
O14524-1	TMEM194A; NEMP1	-0.210173956049706	3.28134334053276	-1.4256224519722	0.20410033372925	0.999660365730703	-4.75102269312357
Q9BYD2	MRPL9	0.0723306104762478	3.33849283127085	1.85564902558097	0.113146590002953	0.999660365730703	-4.75200033849536
O14810	CPLX1	0.192048744873778	3.10312920117918	1.61332236233052	0.158047150867996	0.999660365730703	-4.75315085741105
Q8IV36	HID1	0.058445220212653	3.2799621336221	1.70995405884394	0.138374692010007	0.999660365730703	-4.75408333363725
Q969S2-1	NEIL2	0.101128089063625	3.30955057540727	1.08840094133073	0.318391066629586	0.999660365730703	-4.75636981394632
O95057	DIRAS1	0.101303551035975	3.27764427678567	0.978363220578137	0.36585821897154	0.999660365730703	-4.75736604934525
O60307	MAST3	-0.165649490091618	3.2200073506242	-0.660157636730459	0.533778178222881	0.999660365730703	-4.7578342371331
Q8N5J2-3	FAM63A; MINDY1	-0.124396200955973	3.29123871245931	-0.875824300471933	0.414968864500374	0.999660365730703	-4.75866505509285
P08235	NR3C2	-0.00803729014382882	3.31556609814109	-0.029650297256119	0.977312247535939	0.999660365730703	-4.7588012907798
O00628	PEX7	-0.082532254796199	3.30387456587042	-1.4234153677533	0.204709588547473	0.999660365730703	-4.76155445231655
A4D1E9-1	GTPBP10	0.0877287915488864	3.33588456058883	1.99436677951263	0.0933882032049944	0.999660365730703	-4.76178325519018
Q9BQ65	USB1	0.168275693750994	3.30637992566897	1.16235445279599	0.289439691429327	0.999660365730703	-4.76196981555424
Q9P243-1	ZFAT	-0.105465136371985	3.33509473747776	-1.2986519510912	0.241964561170284	0.999660365730703	-4.76469025803917
Q96EN9-1	C19orf60; REX1BD	0.0121345885920364	3.30860323307931	0.0608472701122163	0.95346656850868	0.999660365730703	-4.76486563915114
P81408-4	FAM189B	0.123548840470624	3.2904676351582	0.739605514507722	0.487590175168554	0.999660365730703	-4.76569814538596
O94850	DDN	-0.112057821204271	3.34629638097495	-0.942399422619027	0.382541137411595	0.999660365730703	-4.76714555716262
Q13370	PDE3B	-0.0921944761792923	3.32638726579106	-1.13272274903826	0.300761706831832	0.999660365730703	-4.76805091746577
Q5EBL2	ZNF628	-0.100460115500294	3.37095872425138	-0.981399235676106	0.364476498809859	0.999660365730703	-4.7687639912249
O94901-9	SUN1	-0.199772344339267	3.2979386165825	-1.80476959774748	0.121394913331165	0.999660365730703	-4.76949876992415
Q9GZP1	NRSN2	0.107895046067382	3.32967547267321	0.697340238303171	0.511816888848385	0.999660365730703	-4.77486502760525
Q8NHS3	MFSD8	0.163717433938705	3.2546461045521	0.748973388230839	0.48232788188831	0.999660365730703	-4.77513940425388
Q05481-1	ZNF91	0.109985710639981	3.28165599599503	1.36281145362098	0.222103092691409	0.999660365730703	-4.77652408987756
Q96MC5	C16orf45	0.0854176583445776	3.3091949952111	1.19962599591633	0.27571638679668	0.999660365730703	-4.77655475491859
Q8TEB9	RHBDD1	-0.119041800790195	3.29651906447598	-0.776805892795206	0.466925284031761	0.999660365730703	-4.77731373380801
P36402-3	TCF7	-0.108784340203597	3.32187895410031	-0.982189967411361	0.364117307523976	0.999660365730703	-4.77750821479548
P36776	LONP1	0.0555965004930112	3.33503194007254	2.26873846725143	0.0639953252996909	0.999660365730703	-4.77766650927341
Q8TCG5-1	CPT1C	-0.102762989538965	3.28031349741197	-0.999489248679268	0.356329117776904	0.999660365730703	-4.77820001368486
Q9Y2L8	ZKSCAN5	-0.108365775798739	3.33641668382301	-0.978420098728414	0.365832295164476	0.999660365730703	-4.77884591042153
Q8NCK3	ZNF485	-0.0854355399863185	3.32827151110778	-1.25082122138871	0.257785041795859	0.999660365730703	-4.77930164802029
Q9NRJ7	PCDHB16	-0.0968616414614174	3.28854883111356	-1.01803070753276	0.34812992148736	0.999660365730703	-4.78217923104489
Q96GL9	FAM163A	0.12409857151764	3.25275194655257	0.86401739270552	0.420930150251734	0.999660365730703	-4.78498092634969
P28827-2	PTPRM	-0.0801412465925332	3.31769348234807	-1.23659516889395	0.262662775376923	0.999660365730703	-4.78521803680772
O75570	MTRF1	0.0516427913867446	3.3179173193968	1.63530098982853	0.15334910695225	0.999660365730703	-4.78545532484043
Q15777	MPPED2	-0.0951716177809926	3.33203785812727	-0.565715889270742	0.592196546608403	0.999660365730703	-4.78709629897256
Q5T7W0-4	ZNF618	0.0608879957108915	3.29211664391986	1.49979993196671	0.184572796376874	0.999660365730703	-4.79023294727661
P51178-2	PLCD1	0.0931911009124328	3.33127583063955	0.905213598819879	0.400405662932701	0.999660365730703	-4.79292643749743
Q92771	DDX12P	0.0277314294578045	3.30816741272665	0.162534491028418	0.876246546042792	0.999660365730703	-4.79366749402188
O14526-1	FCHO1	-0.0798624951473054	3.31205947731344	-0.44044306498333	0.67511505627454	0.999660365730703	-4.79463779649308
Q8N5Z0-1	AADAT	0.0721035510445758	3.34016697303205	1.59873723651191	0.161240444016624	0.999660365730703	-4.79523643707405
O43716	GATC	0.0754899874007233	3.30624444136143	1.52797862067091	0.177622078934707	0.999660365730703	-4.79556557244535
Q5D1E8	ZC3H12A	-0.100868990635889	3.3156988241052	-0.973686737381939	0.367994624699831	0.999660365730703	-4.79802375066847
Q9UQ49-2	NEU3	-0.054616101599453	3.30094850402203	-0.285361650194852	0.785008236016002	0.999660365730703	-4.79951576877398
O95201	ZNF205	-0.0998829244895474	3.3278561104474	-1.08831362864176	0.318426627463084	0.999660365730703	-4.79976927610208
Q9NXR5	ANKRD10	-0.038785593734066	3.33982362921008	-0.126651541095112	0.90337390392305	0.999660365730703	-4.80143644529706
Q9H063	MAF1	-0.0653535594469362	3.27979637538313	-1.5098820377296	0.182057110171938	0.999660365730703	-4.80269481795644
Q9H2G4	TSPYL2	-0.130577826029801	3.35910672186825	-0.764596179017725	0.473639339539579	0.999660365730703	-4.80370438757025
Q6ICH7	ASPHD2	-0.0984465803369729	3.31105957679591	-0.575386956320262	0.586045432889773	0.999660365730703	-4.80498708804785
Q13948-2	CUX1	0.0755630126446835	3.28722127938483	0.520711135293964	0.62130726899679	0.999660365730703	-4.80518970843852
Q86YA3-1	C4orf21; ZGRF1	-0.0561725467608928	3.33102345433797	-1.95454282950204	0.0986767928487039	0.999660365730703	-4.80571858976225
P02452	COL1A1	-0.154227028191733	3.33594111572145	-0.424429770806704	0.686121133762603	0.999660365730703	-4.80576092827419
Q92665	MRPS31	0.0571133175887691	3.33790842492692	1.96474915136579	0.0972932954218016	0.999660365730703	-4.80717538956504
Q9UJW8	ZNF180	-0.0961237629038626	3.3107621795729	-1.4216426474631	0.20520014902602	0.999660365730703	-4.80727738703597
O43309	ZSCAN12	-0.0936716546761514	3.35186045526493	-1.05629682549863	0.331689439742704	0.999660365730703	-4.80738226266361
P38936	CDKN1A	0.00612915124807749	3.31812844197496	0.0370682030827299	0.971638960412054	0.999660365730703	-4.80747624935716
Q96QA6	YPEL2	-0.0941241862494694	3.35855535343281	-1.05383198973635	0.332729011626637	0.999660365730703	-4.80754128507177
Q8N6I1-1	EID2	-0.11445698331808	3.3127472818499	-1.23603409720642	0.262856795013104	0.999660365730703	-4.80756727618156
Q8IXM6-1	NRM	-0.193447615517813	3.2919400632615	-1.26488121291457	0.253042493797037	0.999660365730703	-4.80800394279919
Q9BR11	ZSWIM1	-0.0815274823652977	3.29361018366754	-0.478779089138547	0.649125745798648	0.999660365730703	-4.80877643721688
P56270-2	MAZ	-0.092171136955858	3.36149694316921	-1.82327058244225	0.118328982841033	0.999660365730703	-4.81034099738737
O15131	KPNA5	0.103107933827152	3.35025483045214	0.949680116322704	0.379116689746948	0.999660365730703	-4.8105454889417
Q8TAQ5-2	ZNF420	-0.15270526733442	3.30135884304255	-1.02285280885949	0.346022573795862	0.999660365730703	-4.81141186992626
P48058-1	GRIA4	-0.045584071826911	3.29149245542728	-0.272742527038355	0.794239242697837	0.999660365730703	-4.81160183740557
P13521	SCG2	0.0678127776721903	3.30393238605333	1.51663551612967	0.180389981760142	0.999660365730703	-4.81409293723873
Q8NB42-1	ZNF527	-0.125753764816627	3.3416623823414	-0.91508558940599	0.395601899330142	0.999660365730703	-4.81525139425186
O00124-1	UBXN8	-0.0961181443422051	3.3157935448073	-1.02395143468817	0.345543895224922	0.999660365730703	-4.81754087068996
Q8WVL7	ANKRD49	0.105598360373902	3.3069628867189	1.32928681784134	0.232290604310004	0.999660365730703	-4.81827317915775
O75373	ZNF737	-0.107211338914556	3.33645518220665	-0.815273457110618	0.446212210372685	0.999660365730703	-4.81877429948897
Q9NSD4	ZNF275	-0.0902589702439733	3.30117065338407	-0.77129397105841	0.469947952799214	0.999660365730703	-4.81959514131613
Q9BUT9-1	FAM195A; MCRIP2	-0.0216110271116178	3.32135078889021	-0.12483923055143	0.90474815454843	0.999660365730703	-4.82116663038399
Q86YJ7-1	ANKRD13B	-0.129882520150323	3.32862506059591	-1.39156171769377	0.213690330113091	0.999660365730703	-4.82195218131995
Q2LD37-1	KIAA1109	-0.102333224095674	3.36559900861151	-0.539888915071555	0.608805694633184	0.999660365730703	-4.82355525616028
P17707-1	AMD1	0.0666615007978657	3.2996829933933	1.43297393761252	0.202083000108255	0.999660365730703	-4.82392604093204
Q8N565-2	MREG	0.0713001354680983	3.29537990851495	1.40069653774529	0.211078714586519	0.999660365730703	-4.82487941756079
Q8IYL3	C1orf174	-0.0668410685568675	3.31622347213422	-1.42138500512971	0.205271535556423	0.999660365730703	-4.82525661629806
Q9Y2S7	POLDIP2	0.0688486734142519	3.32337531441458	1.79669366875411	0.122757683734271	0.999660365730703	-4.8274728844788
O95873	C6orf47	-0.083842246337658	3.31009157654348	-0.852974762443035	0.426562969017136	0.999660365730703	-4.8282084272931
Q53EQ6-1	TIGD5	-0.0905060837185755	3.32642912201648	-0.872269597734961	0.416756952377438	0.999660365730703	-4.83027074743403
O43296	ZNF264	-0.146081076991104	3.32429505923861	-1.35480893873814	0.224497584698829	0.999660365730703	-4.83058446344858
A5PLL7	TMEM189; TMEM189-UBE2V1	0.0545686965842517	3.34868966317967	0.295697361132578	0.777475961859322	0.999660365730703	-4.83075993209405
Q9NS15-1	LTBP3	-0.0851692327274705	3.33558131909422	-0.651352082252687	0.539066565310025	0.999660365730703	-4.83218659638487
Q643R3	LPCAT4	-0.102614360456007	3.30754526446462	-0.966830078462227	0.371144786017284	0.999660365730703	-4.83259205728299
Q8N5I2	ARRDC1	-0.0830228205418952	3.28922756862668	-0.851654129666432	0.427240335554564	0.999660365730703	-4.83285165023262
Q86U28	ISCA2	0.0678125236866023	3.30916682193798	1.38044806901653	0.216907392961755	0.999660365730703	-4.83297136951602
O14713-1	ITGB1BP1	-0.0300736625193839	3.28952756802246	-0.168220408177996	0.871963835178282	0.999660365730703	-4.83354816201797
Q9UGJ0	PRKAG2	0.0804402637666865	3.29746284494625	1.28949937548447	0.244923627731769	0.999660365730703	-4.83360321365884
Q8N490	PNKD	-0.102410783054332	3.32081229736225	-0.728098658857493	0.494107566929403	0.999660365730703	-4.83361246221841
Q9Y3D3	MRPS16	0.100027631029366	3.30996793760872	1.69460648562839	0.141332850239881	0.999660365730703	-4.83361602429034
O14492	SH2B2	-0.0509932294364195	3.30868155486659	-0.301062376017784	0.773576516428316	0.999660365730703	-4.83368897039955
Q96T66-1	NMNAT3	0.0822853772675607	3.30618460597931	0.874323884404785	0.415722903009621	0.999660365730703	-4.83399080664429
O00391	QSOX1	-0.0961230487636775	3.31443024417702	-0.796340738951508	0.456322981138815	0.999660365730703	-4.83571648130996
Q8WYQ9	ZCCHC14	-0.0793173176994571	3.31911551053651	-1.09688800550775	0.314950135887042	0.999660365730703	-4.83795979536688
Q8N392-1	ARHGAP18	0.0773248391294924	3.32091489349201	0.574695294480965	0.586484103119709	0.999660365730703	-4.84084105802253
Q9UN86	G3BP2	-0.275466169696881	3.31968321526739	-1.1790274105107	0.283230052562515	0.999660365730703	-4.84130673563643
Q9UDW1	UQCR10	0.129608463038985	3.27304696780177	1.36093025155218	0.222663894883336	0.999660365730703	-4.84156099584389
Q86Y01	DTX1	-0.0933927080694249	3.31429587039666	-0.91976985338186	0.393337986187011	0.999660365730703	-4.84218001271401
Q9NVD3	SETD4	0.117682688159532	3.19744070270908	0.277835703378701	0.790509033655698	0.999660365730703	-4.84393947923394
Q15034	HERC3	-0.0889866078607254	3.28007392362764	-0.982789312685256	0.363845240608698	0.999660365730703	-4.84394105874829
Q8NDN9	RCBTB1	-0.0949093853057351	3.29826247869701	-1.36517212251241	0.221401166422827	0.999660365730703	-4.84449079443279
Q96AX9-14	MIB2	-0.0753089421467508	3.30127221635809	-0.360583749296673	0.730824835488917	0.999660365730703	-4.84477858160582
P55283	CDH4	-0.119498348636362	3.30990370894619	-0.545186317218547	0.605377558575677	0.999660365730703	-4.84561273474473
P17405-1	SMPD1	0.0178480876289521	3.32963311744696	0.111342488592825	0.91499359381577	0.999660365730703	-4.84572538440061
Q96DN6	MBD6	-0.177495625109133	3.31884059320058	-1.2387929397085	0.261903986211387	0.999660365730703	-4.84652399192972
Q8TBZ8	ZNF564	-0.079066035431375	3.25977484594697	-0.498695622543655	0.635831348134352	0.999660365730703	-4.84697601106268
Q6NXR4	TTI2	0.0746803284978975	3.31308625231527	1.81471145482927	0.119737753374293	0.999660365730703	-4.84716651217304
Q59EK9-1	RUNDC3A	-0.0785296815164301	3.3098064551025	-0.978258658070665	0.365905880044504	0.999660365730703	-4.84838129482222
Q9NVV0	TMEM38B	-0.150738549085218	3.32704606814349	-1.00142243958869	0.355467095477328	0.999660365730703	-4.84868514838884
Q8TAB5	C1orf216	-0.0553939433841754	3.29511170390598	-0.385304311779069	0.713365477892931	0.999660365730703	-4.84924796609738
Q9P209	CEP72	-0.0709751537828994	3.32327111389552	-1.43616062009659	0.201214253906156	0.999660365730703	-4.85036934003486
Q9Y5Q0	FADS3	-0.105893615277737	3.30075204621931	-0.826626141348722	0.440227426912397	0.999660365730703	-4.85056536839027
Q9UPP2	IQSEC3	0.0548318709225334	3.35022751669372	0.381559586794413	0.715998385371237	0.999660365730703	-4.85124510498102
P50219	MNX1	-0.0852045256008269	3.30033359268307	-0.704336691224717	0.507751988260475	0.999660365730703	-4.85161481871657
Q92618	ZNF516	-0.048348147880266	3.32508848258224	-1.93732707870357	0.101055415419835	0.999660365730703	-4.85330374797038
Q3V5L5-2	MGAT5B	0.0775935254158457	3.29319923809989	0.772951063646298	0.469037785658402	0.999660365730703	-4.85618579084484
Q9NV64-1	TMEM39A	-0.141525509947256	3.35246832276616	-0.809020120853065	0.449533756493217	0.999660365730703	-4.85621374369485
Q9HAR2-4	LPHN3; ADGRL3	-0.0979200504210307	3.33695513046362	-1.47445622601613	0.191040639713309	0.999660365730703	-4.85653633540411
O75439	PMPCB	0.0480715169224973	3.33129627677046	2.04050923118182	0.0876175453282183	0.999660365730703	-4.85956483320057
P46783	RPS10	-0.0641359288480146	3.31793525197218	-2.29530826041129	0.0617096364115481	0.999660365730703	-4.8600985989923
Q9H892-2	TTC12	-0.0746284137737029	3.32447206909714	-0.642606068795037	0.544352024153264	0.999660365730703	-4.86284391287518
P15291	B4GALT1	-0.0740883940617592	3.36785028145105	-0.521761545208716	0.620618872091367	0.999660365730703	-4.86397408166948
P31629	HIVEP2	0.00826116803473878	3.3678908082234	0.0481896740718134	0.963136674498722	0.999660365730703	-4.86416427097293
Q8NDH6	ICA1L	-0.11017123079438	3.31147087646582	-1.05002638741414	0.334339294575533	0.999660365730703	-4.86510133172112
Q92630-1	DYRK2	-0.0736480879775464	3.37664361159344	-0.946283826746224	0.380711142165821	0.999660365730703	-4.86533160602744
Q9ULI3	HEG1	-0.00232457003713218	3.28961742454267	-0.0152519143584964	0.988328104017659	0.999660365730703	-4.86626278881902
O00115	DNASE2	0.0775764458263568	3.27811737245932	1.32782019676289	0.232745729397148	0.999660365730703	-4.86847906319862
Q9P1U0	ZNRD1	0.0758435324224256	3.2892759509329	1.10373758904339	0.312195692991343	0.999660365730703	-4.86983060221365
Q8IXX5	TMEM183A	-0.0863911959946313	3.29382145783802	-0.946761038736603	0.380486791389192	0.999660365730703	-4.87849180440993
Q9H0M0-1	WWP1	-0.0569129378596762	3.32441567019011	-0.339962418184323	0.74552617677703	0.999660365730703	-4.87904172138259
Q9Y6A1	POMT1	-0.19676290596844	3.31153603745607	-1.30134435616679	0.241100166800782	0.999660365730703	-4.88044922967418
Q9BRK0-2	REEP2	-0.0744324575693356	3.30041540989199	-1.09956914313252	0.313869561938073	0.999660365730703	-4.88076145034152
Q5T4T6	SYCP2L	-0.0973026712137349	3.30889917917363	-1.05657662731045	0.331571598319597	0.999660365730703	-4.88198513375458
Q8WVP5	TNFAIP8L1	-0.0122625129257891	3.2302846114387	-0.076257202325825	0.94170564191772	0.999660365730703	-4.8842274351556
Q5VW38-2	GPR107	-0.0676595102258736	3.30428403741634	-1.3376429454265	0.229712722441355	0.999660365730703	-4.88428850840288
Q96SK3	ZNF607	-0.107552601623422	3.30770148071014	-0.840391228719852	0.433049436018494	0.999660365730703	-4.88564094864707
Q9UMR3	TBX20	-0.0682938299040566	3.33693927538056	-1.68732207599439	0.142758257346101	0.999660365730703	-4.88627949022606
Q8IYN0	ZNF100	-0.0819817957309463	3.32464936923348	-1.17647013874383	0.284175013276675	0.999660365730703	-4.8868056805139
O60296	TRAK2	-0.0913343831447262	3.33938978219632	-1.02895043330858	0.343372544314343	0.999660365730703	-4.88812119208976
Q8N972	ZNF709	-0.135404906683006	3.31745817006891	-0.806271751816057	0.450999199450003	0.999660365730703	-4.88873851770105
Q9GZU3	TMEM39B	0.0666078238657669	3.24392618512829	0.515919388904946	0.624452917255806	0.999660365730703	-4.88979586411911
Q6NT04	TIGD7	-0.0486362921062465	3.33794261764352	-0.306706903656431	0.769481727257489	0.999660365730703	-4.89029632210137
Q8N960	CEP120	0.0502560800434104	3.31612962529487	1.72901872722743	0.134783826838025	0.999660365730703	-4.89124585992977
Q96NG3-1	TTC25	0.0556711118893989	3.34433817100132	0.477569532228728	0.649937787328795	0.999660365730703	-4.89153433508901
Q9ULX5-2	RNF112	-0.0886344086939875	3.28625840692514	-0.742727511193187	0.485832075829655	0.999660365730703	-4.891593273717
Q9UJU3	ZFP112; ZNF112	0.0259873193708404	3.2981897860196	0.181880616799445	0.861694515527063	0.999660365730703	-4.89169579074279
O94811	TPPP	0.0623332667580847	3.32326701852064	1.35098001052502	0.225651496610374	0.999660365730703	-4.89176593594222
P13498	CYBA	-0.131966572052577	3.41820064842451	-0.692993562596193	0.514353098976441	0.999660365730703	-4.89199698516041
Q8WTV1	THAP3	-0.0860942907844772	3.31405196921832	-1.05476191896824	0.332336491120728	0.999660365730703	-4.89222878317387
P23786	CPT2	0.0938331763428846	3.3143380176094	1.93092324489467	0.101954823023783	0.999660365730703	-4.89274701192425
O76050-2	NEURL; NEURL1	-0.0760675609059756	3.30219253108765	-0.619662328261424	0.558371707751904	0.999660365730703	-4.89298702723763
Q9Y5E4	PCDHB5	0.0876891601495319	3.26651075370498	0.784504903095298	0.462726165784979	0.999660365730703	-4.89454072320692
Q5T0D9	TPRG1L	-0.108229662223172	3.30017863133344	-1.20894595311232	0.272373642708042	0.999660365730703	-4.8949591534983
Q9BV35-3	SLC25A23	0.0572493781434102	3.31353666952224	0.420918600947659	0.688545849309052	0.999660365730703	-4.89813207498925
Q96MH6-1	TMEM68	-0.0673158837103943	3.2929558215879	-0.333106400360732	0.750440507816855	0.999660365730703	-4.89845468723571
Q13563	PKD2	-0.130709025873477	3.33096446593193	-0.842966429482502	0.431716128506344	0.999660365730703	-4.90044610434334
Q9HAC7-3	C7orf10; SUGCT	0.0745082336156155	3.31676788197892	1.3487356916971	0.226330345526853	0.999660365730703	-4.90211771756555
Q9H903-4	MTHFD2L	0.0840394075413816	3.3111893779285	0.930028982425942	0.388414490034917	0.999660365730703	-4.90239554202415
Q86TH1	ADAMTSL2	-0.101327793521772	3.36769240079019	-0.648874885229225	0.540560290836846	0.999660365730703	-4.90302854253335
P53597	SUCLG1	0.0830355277049689	3.32678988674241	2.02437079851496	0.0895935720009312	0.999660365730703	-4.90325006376267
Q15772	SPEG	-0.0456031736656251	3.31021726532488	-0.373667479543598	0.72156131897447	0.999660365730703	-4.90376267225891
Q9UJP4-1	KLHL21	-0.0952137136433937	3.30255977415931	-0.885525726718156	0.410118108509946	0.999660365730703	-4.90495045758773
P04632	CAPNS1	0.0668867803017516	3.29658396188605	1.73003253671958	0.134595437359521	0.999660365730703	-4.90740267636195
Q13608	PEX6	-0.0793845123457926	3.28965495280598	-1.35321574472616	0.224977071722031	0.999660365730703	-4.90748019415508
O43570	CA12	-0.0658086439581206	3.36324686339902	-0.518431773515221	0.622802518094191	0.999660365730703	-4.90797573455596
P40425	PBX2	-0.0441533857719607	3.34014564063151	-1.64377017802629	0.151574767729852	0.999660365730703	-4.90907300629403
Q9UN67	PCDHB10	-0.0895266220084786	3.30104986620611	-0.787046337035684	0.461345914001781	0.999660365730703	-4.90962009073822
Q8TBZ5	ZNF502	0.0382485263895435	3.33175166053099	0.305944591257179	0.770034269704803	0.999660365730703	-4.91003282083275
Q86WZ6	ZNF227	-0.114257188480675	3.32988768430199	-1.23764497184383	0.262300087472298	0.999660365730703	-4.91023988051215
Q8N8J6-2	ZNF615	-0.0190440275916473	3.32556511727082	-0.099563664468228	0.923949698749588	0.999660365730703	-4.91067246080673
Q8NEH6	MNS1	-0.0663919888558481	3.33105902453405	-0.481518254575195	0.647288749833701	0.999660365730703	-4.91135157102816
P82673-1	MRPS35	0.0512212493956272	3.33023124899189	1.81345548390304	0.119945866425023	0.999660365730703	-4.91230269862373
Q9HAH7-1	FBRS	-0.0818490762650412	3.32069143438071	-1.14344028824497	0.296624090210086	0.999660365730703	-4.91242407156657
Q16563-2	SYPL1	-0.133245879977215	3.31033308891112	-0.752000743834962	0.48063568786847	0.999660365730703	-4.9125608957816
Q9Y2B1	TMEM5	0.0632141575361399	3.317628555483	0.420196535311145	0.689044992568579	0.999660365730703	-4.9139659346998
Q9C0B9	ZCCHC2	-0.0269470570547594	3.28507796447332	-0.181635482507414	0.861878545525043	0.999660365730703	-4.91435065278076
Q9NQ86	TRIM36	-0.0897285799282253	3.32256141382397	-0.806494979261963	0.450880045816338	0.999660365730703	-4.91530239191698
Q8N3T6	TMEM132C	-0.0794634017343707	3.31830446364488	-0.66986674169204	0.527985799815565	0.999660365730703	-4.91543731936047
Q9BR77-1	CCDC77	0.0559791896261877	3.33264962322531	1.72531509859707	0.135474234788887	0.999660365730703	-4.91615584853065
P24278	ZBTB25	-0.068835270449807	3.33427043705678	-0.623239512986271	0.556171289688643	0.999660365730703	-4.91894944160339
P30039	PBLD	0.0765866562780463	3.35346716893343	0.564130042576068	0.593208775608654	0.999660365730703	-4.91971431926765
Q96DP5	MTFMT	0.0703697639291753	3.30931300049695	1.3374353128858	0.229776464766101	0.999660365730703	-4.92054503028254
Q8N370-3	SLC43A2	0.0582751699507684	3.29660017876065	0.45667483571864	0.664048048061838	0.999660365730703	-4.92065518686179
Q9BVS5	TRMT61B	0.0712749194797071	3.31865235673135	1.76513855354247	0.12822824800569	0.999660365730703	-4.92098672952668
Q6UUV9-2	CRTC1	-0.0631607367668218	3.32260439243705	-1.37939994075578	0.217213057065912	0.999660365730703	-4.92153174388174
A8CG34-1	POM121C	-0.138799566645951	3.31172970558814	-0.485686826610836	0.644498360321891	0.999660365730703	-4.92231842130439
Q8NCP5	ZBTB44	-0.07243845333555	3.32548034668311	-0.835923020681179	0.435370001887776	0.999660365730703	-4.92299995331194
Q9BXT5	TEX15	-0.0808742581459524	3.33324343573873	-0.863484248782628	0.42120083070341	0.999660365730703	-4.92394660727379
O43294-1	TGFB1I1	0.0313576722450563	3.30338485001802	0.231051716813215	0.824989072038792	0.999660365730703	-4.92404687722313
Q9H246	C1orf21	-0.0965978669683877	3.30759278784403	-0.841647217700019	0.432398772247345	0.999660365730703	-4.9273343340242
P51843	NR0B1	-0.0680797970558121	3.31234040618355	-0.568985037563706	0.590113059630248	0.999660365730703	-4.92864773797522
Q9H1X3-3	DNAJC25-GNG10; DNAJC25	0.130159981625058	3.23371963115317	0.791420983042613	0.458976878724347	0.999660365730703	-4.92895701788746
Q5QP82	DCAF10	-0.0760246413722125	3.30202070730583	-1.19404713155301	0.277734228521135	0.999660365730703	-4.92910507311873
O75914-3	PAK3	-0.0803371054576385	3.32993938987193	-1.24089812356992	0.261178959987185	0.999660365730703	-4.92916671516375
O94760-1	DDAH1	-0.0396196656646155	3.32786110145286	-1.84528257493922	0.114780841169532	0.999660365730703	-4.93097401621209
Q9C0D4	ZNF518B	-0.0306276852760512	3.27067331598271	-0.22289330338466	0.831048571542331	0.999660365730703	-4.93166421724101
Q8WWX9	SELM; SELENOM	-0.0755098706540503	3.3217072669361	-0.905512026351853	0.400259797763425	0.999660365730703	-4.93283152648227
O95461-1	LARGE; LARGE1	0.0634655573955353	3.28544661857988	0.473843013050872	0.652442916107938	0.999660365730703	-4.93405223472842
P43351	RAD52	-0.0398264555471784	3.35311317545707	-0.233784547974399	0.822962246696009	0.999660365730703	-4.93454018240173
Q9H2C2	ARV1	-0.125995926679384	3.3439642257195	-0.927888359481243	0.389437866142269	0.999660365730703	-4.9353685010421
Q9Y4X4-1	KLF12	-0.0667438114135074	3.33968938711004	-0.470508266831471	0.654688902854022	0.999660365730703	-4.93591338044084
Q16539	MAPK14	0.0604427390785207	3.30599866311875	1.27265874905272	0.250452206007004	0.999660365730703	-4.93597429224761
O60936-3	NOL3	0.110614580590443	3.21416251359284	1.26291587650778	0.253700769184668	0.999660365730703	-4.93625883983592
O60609-1	GFRA3	-0.0673525227453664	3.31554286736977	-0.844187746263909	0.431084847469296	0.999660365730703	-4.93804832599358
Q96Q45-3	TMEM237	-0.0798774989687303	3.27962275672393	-0.931890441496919	0.387526262094117	0.999660365730703	-4.93836869591244
Q9H1B5	XYLT2	0.00455651476414434	3.32287854322037	0.0344642699661706	0.973630285280882	0.999660365730703	-4.93866329220841
P17019	ZNF708	-0.00811818545336085	3.27975230651403	-0.0569698918156761	0.956427954766864	0.999660365730703	-4.93902086500456
Q9UMX3	BOK	-0.0589200574778031	3.29953875917258	-0.489936250542441	0.641660373213402	0.999660365730703	-4.93934134986164
P37287-1	PIGA	-0.0824142504626451	3.28118622863635	-0.765731852494049	0.473012010200492	0.999660365730703	-4.94027621380618
Q86YV5	SGK223; PRAG1	-0.0953689670472246	3.30955851706698	-1.07508867994196	0.323850990284513	0.999660365730703	-4.94167266306194
P52740	ZNF132	-0.0763709825880631	3.35300028774092	-0.591138694173973	0.576107767255692	0.999660365730703	-4.94219663063129
Q9H777	ELAC1	0.00796311792672782	3.34581554777858	0.0471722026941244	0.963914321728342	0.999660365730703	-4.94441246605433
Q5VSY0-2	GKAP1	-0.0762242371977859	3.31443593286564	-1.23806044694169	0.262156669223481	0.999660365730703	-4.94459203987132
Q96GZ6-9	SLC41A3	-0.110801449892377	3.32391891431839	-0.525163932250094	0.618391976826507	0.999660365730703	-4.94484964265463
Q6NVY1	HIBCH	0.0759145936941834	3.31415887264993	1.98047254648194	0.0952000747452326	0.999660365730703	-4.9461802557077
Q5HYA8	TMEM67	-0.028977276435911	3.2722474241691	-0.215387068721727	0.836634969486339	0.999660365730703	-4.94623516025001
O95260	ATE1	-0.0591786376171759	3.29724642431289	-0.4148554062015	0.692742481651926	0.999660365730703	-4.94664074475801
Q7Z5Q1-6	CPEB2	-0.133005696620601	3.30575182785427	-0.82351930686165	0.441859437704977	0.999660365730703	-4.94755008806614
O15265-2	ATXN7	-0.0624115274877521	3.32164511493745	-0.636636809205361	0.547978106522226	0.999660365730703	-4.947793873117
Q96K62	ZBTB45	-0.0952524560561478	3.31791872214632	-0.720317253908029	0.498548242058951	0.999660365730703	-4.94788937972863
P12110	COL6A2	-0.0763286470382904	3.33235898776709	-1.14876174028834	0.294587642980148	0.999660365730703	-4.94796678124977
Q96S21	RAB40C	0.0517102139691891	3.28792886467338	0.44376479202062	0.672842876959074	0.999660365730703	-4.94904878051561
Q9Y426	C2CD2	-0.0413905594598683	3.34477282034467	-0.321435338910049	0.758835725138667	0.999660365730703	-4.94930095104563
Q08AN1	ZNF616	-0.0901749981959285	3.30476163010161	-0.60344180253037	0.568416373313573	0.999660365730703	-4.9506826624154
P49411	TUFM	0.0521597907221876	3.32958083086489	2.38202156215867	0.0548242050472359	0.999660365730703	-4.95100773801611
P57682	KLF3	-0.0748842262006295	3.31908159115791	-1.26277608636617	0.253747648280041	0.999660365730703	-4.9518822156219
Q9UKU9	ANGPTL2	-0.067351678286229	3.31538795529546	-1.29169375528941	0.24421126147131	0.999660365730703	-4.95207418755537
Q8WVZ9	KBTBD7	0.0786911459350502	3.29387334995926	1.15903754416021	0.290688788895842	0.999660365730703	-4.952848769736
Q99638	RAD9A	-0.0703801715729606	3.29406290425407	-0.789245038714833	0.460154153510457	0.999660365730703	-4.95327262395226
O60674	JAK2	-0.0599058812650529	3.29546074496229	-0.436670726871396	0.677700030625834	0.999660365730703	-4.95362793470803
Q9Y448	C15orf23; KNSTRN	0.0473552412441781	3.31339061585789	1.77484481122957	0.126520498990247	0.999660365730703	-4.95425219196652
Q9H869-9	YY1AP1	-0.065236148262746	3.32473112405938	-1.48675917663124	0.187874924635	0.999660365730703	-4.95485820333846
Q8IUC8-1	GALNT13	-0.061297986589925	3.29271556984176	-1.26108281291152	0.254316099065494	0.999660365730703	-4.95490546420265
Q9BTN0	LRFN3	0.0187896424677484	3.27719884466509	0.124476585188727	0.905023187274674	0.999660365730703	-4.95517250781496
Q8IYL2	TRMT44	0.0648436709725536	3.30939008948953	0.902080624341677	0.401939437757807	0.999660365730703	-4.95872474128324
Q6PID8-1	KLHDC10	0.061889032608128	3.34624778356948	0.671555438573121	0.526982491410566	0.999660365730703	-4.9593475130295
Q9UGY1	NOL12	0.0519652066943386	3.32075709794534	1.6015460652951	0.160620725396755	0.999660365730703	-4.96207999502738
Q9Y2Z2-6	MTO1	0.0494907207104861	3.32554077599491	1.67599628020439	0.145002162482822	0.999660365730703	-4.96263036512669
Q9Y6N8	CDH10	-0.0413017100919792	3.31731563728879	-0.361669942354317	0.730053865272407	0.999660365730703	-4.96264848515324
Q92800-2	EZH1	-0.0477718919529708	3.29414155927741	-0.42551933437609	0.685369542362801	0.999660365730703	-4.96482812866578
Q9HD47	RANGRF	0.0981695420093392	3.28824570386425	1.4135090609566	0.207464801664449	0.999660365730703	-4.96539446777116
Q9C0F3	ZNF436	-0.124264748939507	3.40804102508598	-0.64358322069354	0.543759886180408	0.999660365730703	-4.96614285875386
Q96FV0	LRRC46	-0.0355842534986545	3.31342220996902	-0.298421442404701	0.775495124687384	0.999660365730703	-4.96639070643413
Q9UK22	FBXO2	-0.0664874307087592	3.31481019444699	-1.04230566893906	0.337625730477359	0.999660365730703	-4.96656799213187
O94827-6	PLEKHG5	-0.00577302145995151	3.32493640598056	-0.0322977743928539	0.975287244986428	0.999660365730703	-4.96692617967332
P30304	CDC25A	0.0842212352164962	3.26473456540142	1.08312995326647	0.320543746091757	0.999660365730703	-4.96736057373362
Q5T5D7	ZNF684	0.0115402364960504	3.29791811991043	0.0688527707631275	0.9473549243999	0.999660365730703	-4.96757229219923
O43189	PHF1	-0.0304515621814759	3.31940937179626	-0.249595936016394	0.811265507095345	0.999660365730703	-4.96805939566243
Q15493-1	RGN	-0.0430291233702259	3.33811908410221	-0.293859088232855	0.778813715368922	0.999660365730703	-4.96884227417214
Q9NP80-1	PNPLA8	0.0442851945101286	3.32653995485058	0.252681370135889	0.808989114890233	0.999660365730703	-4.96885107246383
Q86X40	LRRC28	-0.0737912661173477	3.29567730191098	-0.785567584642636	0.462148669073605	0.999660365730703	-4.96946880716903
Q8NF99-1	ZNF397	-0.0665070881824012	3.33533154141432	-1.05362794088721	0.332815190749197	0.999660365730703	-4.97026820735889
Q9NXS2	QPCTL	-0.0890937974668065	3.2970409819434	-1.02616146471536	0.344582589239876	0.999660365730703	-4.97068056005214
Q96MP8	KCTD7	-0.0640263475129162	3.32849087461018	-0.784765166557611	0.462584682769337	0.999660365730703	-4.97196106248809
Q08ER8	ZNF543	-0.0679845672689518	3.36250831816217	-0.708091348559908	0.505579428140045	0.999660365730703	-4.97278675528511
O95208-1	EPN2	0.0619280383701528	3.29208147189348	1.54312725214343	0.173987823055166	0.999660365730703	-4.9736845527892
P23528	CFL1	-0.0890768748627616	3.2918542043232	-2.32702488834216	0.0590920027125328	0.999660365730703	-4.97408090104338
Q5TAP6	UTP14C	0.0504151176866292	3.33627532297936	0.426227345005779	0.684881361391419	0.999660365730703	-4.97478999041486
Q15131-1	CDK10	-0.102215864348296	3.33586206633326	-1.11545897456022	0.307528772097354	0.999660365730703	-4.97698278684942
Q9C0C7-1	AMBRA1	-0.0562833727816698	3.30684987259145	-0.500295134007864	0.634769999284443	0.999660365730703	-4.97735063419324
Q9NW97	TMEM51	0.0900596209741019	3.28586216610869	0.698446480947522	0.511172737421279	0.999660365730703	-4.97821941593997
Q9NVU0	POLR3E; LOC101060521	-0.031668410683135	3.32127407332574	-1.92788779753521	0.102383947110222	0.999660365730703	-4.98229664847358
Q8WWB7	C1orf85; GLMP	-0.0253435678080623	3.32474699616846	-0.225312273011591	0.829250578398687	0.999660365730703	-4.98233644972017
Q9H8M5-1	CNNM2	-0.0701294800646457	3.26496115810463	-1.19889702878388	0.275979329613536	0.999660365730703	-4.9844734899984
Q14106	TOB2	-0.0802631392653751	3.34089972156284	-1.04710594515279	0.335579343901494	0.999660365730703	-4.98482851664815
Q9Y2D9	ZNF652	-0.080749957479796	3.32826992254632	-0.955348711720127	0.376467058139297	0.999660365730703	-4.98525731186521
Q0P6H9	TMEM62	-0.0467246491438682	3.2872184720615	-0.267967883321258	0.797741593082528	0.999660365730703	-4.98593582654811
O94983-6	CAMTA2	0.00130694419734733	3.33673895662327	0.0112725990908649	0.991373194006936	0.999660365730703	-4.98600837891107
P55345-1	PRMT2	-0.0697435577812161	3.33449684959626	-0.617513027902966	0.55969637467302	0.999660365730703	-4.9863779352806
Q9NRY2-1	INIP	0.147678449167383	3.28796845069698	1.01016526738947	0.351589409362091	0.999660365730703	-4.98944858638912
Q9NQS1	AVEN	0.0576769569803624	3.31130731358233	1.62122675034182	0.15634189326549	0.999660365730703	-4.99033830308041
Q9H9L7	AKIRIN1	-0.0552186776561748	3.3627931828641	-0.613721561361491	0.562037854412692	0.999660365730703	-4.99070097422099
Q96NT3-3	GUCD1	-0.0254708140135218	3.3448364393358	-0.208468110338366	0.841793580036961	0.999660365730703	-4.99089661940802
Q6UN15-1	FIP1L1	-0.0488883908474696	3.30508787438911	-0.468008586416617	0.656375068720077	0.999660365730703	-4.99090090970525
Q9UDV6	ZNF212	-0.0694122393326108	3.33754481110659	-1.01301885947877	0.350331125633789	0.999660365730703	-4.99241487186101
Q9BS31	ZNF649	-0.201774367236909	3.23227330778104	-0.905830079383659	0.400104384593065	0.999660365730703	-4.9925000989412
Q0D2K2	KLHL30	-0.0279789288449356	3.31209960796041	-0.259321857760668	0.804096831950188	0.999660365730703	-4.99527938972466
P22570-7	FDXR	0.0558174080209096	3.32997177598205	1.87333672682202	0.110411358729355	0.999660365730703	-4.99576148670912
Q9UKV3-5	ACIN1	-0.280143932909655	3.3369938150249	-1.12194653281447	0.304970928765028	0.999660365730703	-4.99582414905775
Q9NZJ5	EIF2AK3	-0.0898152258598872	3.31374038935546	-1.14150328124736	0.297368309380019	0.999660365730703	-4.99742801302808
Q9NRA0-5	SPHK2	-0.059018351671943	3.30492315184465	-0.680804562763824	0.521509217380748	0.999660365730703	-4.99831842849033
Q8TEY5	CREB3L4	0.0724541632013987	3.3171885732354	0.787988032904663	0.46083521998285	0.999660365730703	-4.99878606451086
Q6NZI2-1	PTRF; CAVIN1	-0.0345039042690423	3.25188459403781	-0.217557248676755	0.835018755699305	0.999660365730703	-4.99881041284196
O95466-2	FMNL1	-0.054938115836403	3.31933098225958	-0.475970688207215	0.65101198811088	0.999660365730703	-4.99919098512425
A8K8P3	SFI1	-0.0910296976415303	3.31631553294915	-0.856346307785644	0.424837267021447	0.999660365730703	-4.9995679754404
Q9Y5J6	FXC1; TIMM10B	-0.0970802205008828	3.30146868352994	-0.855923965419394	0.425053156617547	0.999660365730703	-4.9998555189719
Q9C0I4	THSD7B	-0.0639193400838037	3.31534495971797	-0.727430895776508	0.494487590597143	0.999660365730703	-5.00059671831028
O96018	APBA3	-0.0584329596707417	3.30456180391105	-0.516789872462906	0.623880820603212	0.999660365730703	-5.0006688728338
Q14152	EIF3A	-0.0294803678855151	3.31987132367298	-2.5197310273446	0.0454971157752638	0.999660365730703	-5.00094302865116
P61018-2	RAB4B	-0.0620287524581151	3.30838163704026	-1.10352068721128	0.312282607568345	0.999660365730703	-5.00150743333589
P09382	LGALS1	0.0826782747685598	3.29554085223019	1.75102875760795	0.130751133241058	0.999660365730703	-5.00153111432182
Q6P4I2	WDR73	-0.0650255309166172	3.33129101731349	-1.49889805054065	0.184799411027861	0.999660365730703	-5.00155065480006
P48552	NRIP1	0.0473918999456483	3.30687043907989	1.79756204615646	0.122610429274779	0.999660365730703	-5.00172977592233
Q6P4Q7	CNNM4	0.0376449437993222	3.28125155822444	0.272304019830282	0.794560683516624	0.999660365730703	-5.00183100337005
Q8WYN0	ATG4A	-0.0703550661857898	3.32205936979642	-0.943071158481734	0.382224185915029	0.999660365730703	-5.00187743059392
Q9UH73	EBF1	0.0577187576025035	3.30159195017965	1.19922858466218	0.275859708605954	0.999660365730703	-5.00198410848407
Q96KS0-1	EGLN2; RAB4B-EGLN2	-0.0466299122298285	3.30127954864812	-0.311951185962024	0.765684585472488	0.999660365730703	-5.00227591984283
Q96NU1-5	SAMD11	-0.054027699943717	3.31598718758076	-1.35964295902974	0.223048385613139	0.999660365730703	-5.00309976115302
Q9H8N7	ZNF395	0.0318906717118433	3.26988457245514	0.230153378538199	0.825655655880512	0.999660365730703	-5.00361832734949
Q8N3D4	EHBP1L1	-0.0438633784628853	3.33196188766208	-0.364157940792035	0.72828921109291	0.999660365730703	-5.00369587199145
Q9BYX2	TBC1D2	-0.0543560205700339	3.31589353239448	-0.5480710211148	0.603515383967678	0.999660365730703	-5.00400785674243
Q96GF1-1	RNF185	-0.0637442224552306	3.35603954102531	-0.405687097376495	0.699111055827319	0.999660365730703	-5.00403976525514
Q14CS0	UBXN2B	-0.0707497248296814	3.34191701483745	-1.22143061002756	0.267950855784915	0.999660365730703	-5.00443925925573
Q4G0T1-3		-0.0699902753070927	3.32208274182777	-1.18367352933654	0.281520114426882	0.999660365730703	-5.00490392957567
Q9UM47	NOTCH3	-0.0432689512497607	3.30021881579969	-0.403472683864346	0.7006533131506	0.999660365730703	-5.00492163079991
Q9UJK0	TSR3	0.0765101542740079	3.28156300327307	0.529591645688612	0.615500640692525	0.999660365730703	-5.00496508745791
P35754	GLRX	0.0670253828323696	3.31143911299551	1.38053551859474	0.216881907853917	0.999660365730703	-5.00631369470306
Q8TC05	MDM1	-0.0782268473171478	3.32795570718589	-0.880718375730069	0.412516452875893	0.999660365730703	-5.00665109034547
P16402	HIST1H1D	0.120768848736399	3.26688838371918	0.935139229593732	0.385979804349958	0.999660365730703	-5.00699629536674
Q8NHG8	ZNRF2	-0.0798806945078312	3.31070153285143	-1.32880589491764	0.232439757323365	0.999660365730703	-5.00894236269955
Q8IUX4-1	APOBEC3F	0.0492772961899242	3.29634055826618	0.577892110948325	0.584458214493353	0.999660365730703	-5.009861007645
Q9P2H5	USP35	-0.0780790513253981	3.30021165051763	-0.863725351987176	0.421078405099578	0.999660365730703	-5.01001817946004
P56178	DLX5	0.0224761213977664	3.28119069800686	0.221184395799023	0.832319460958417	0.999660365730703	-5.01071072377017
Q8N357	C2orf18; SLC35F6	0.12009352891567	3.28815691077026	0.790146507700789	0.459666162342381	0.999660365730703	-5.01076518662805
Q9UKZ9	PCOLCE2	-0.0583517650955052	3.32207600295434	-0.617952504029678	0.5594253575406	0.999660365730703	-5.01152371791116
P17787	CHRNB2	-0.0692200434411882	3.28651963287384	-0.736056056098199	0.489594272643454	0.999660365730703	-5.01156130192899
Q9H7D0-1	DOCK5	-0.0633958608456076	3.31058076411239	-0.874383594581614	0.415692875911071	0.999660365730703	-5.01159011244609
Q9Y6B2-1	EID1	-0.0655126228034107	3.30961369397862	-0.784298885430045	0.462838181676072	0.999660365730703	-5.01198262483651
Q5FWE3-1	PRRT3	-0.0491525963556623	3.30028051940132	-0.412086246387686	0.694663150372523	0.999660365730703	-5.01229938122284
Q8TF61	FBXO41	0.0265910455358125	3.24714687578617	0.111046413436071	0.915218554879893	0.999660365730703	-5.01261275544685
O75541	ZNF821	-0.0514485323549752	3.31134669748015	-0.510844628395935	0.62779384516895	0.999660365730703	-5.01358699978898
Q58EX2-4	SDK2	-0.0559292397122545	3.29393988975497	-0.753730280303473	0.479670774442686	0.999660365730703	-5.01361683538223
P51911	CNN1	0.0584930293969141	3.31507277750892	1.18498966045676	0.281037344135312	0.999660365730703	-5.01384734155612
Q9NWB1-2	RBFOX1	-0.0566711685002337	3.35005850435137	-0.7166218671515	0.500666513786797	0.999660365730703	-5.01475147334939
Q8TEZ7	PAQR8	-0.109520361941849	3.28140437084556	-0.538975199476687	0.609398099349668	0.999660365730703	-5.01576173866995
P07954	FH	0.048268355213972	3.32457058497899	2.16590865106891	0.0737012477262138	0.999660365730703	-5.01593376981481
Q6PI77	BHLHB9; ARMCX5-GPRASP2	-0.00893442584510568	3.35539700351568	-0.0809428230360411	0.938132601242255	0.999660365730703	-5.01594555183336
Q9UL54-1	TAOK2	-0.0898992401348022	3.30173180286812	-0.850891996807671	0.427631602699653	0.999660365730703	-5.01597798947663
Q8WUP2	FBLIM1	0.0682859921942376	3.28586413556378	0.752986191637578	0.480085739472528	0.999660365730703	-5.01620928978445
Q9H8W5-1	TRIM45	0.0557199675422658	3.31454981139405	1.28290840629666	0.247074361890096	0.999660365730703	-5.01747229549169
Q14188	TFDP2	-0.0402468483511653	3.29769086817419	-0.377181549437776	0.719082011909483	0.999660365730703	-5.01805355543817
Q9Y2U8	LEMD3	-0.255417072621633	3.29419186264391	-1.51229161126571	0.181460645220079	0.999660365730703	-5.01830978985297
P98155-1	VLDLR	0.0656702908085957	3.26798678983511	0.62830310400059	0.553065730551666	0.999660365730703	-5.01864188374617
Q9Y586	MAB21L2	0.0688742020560668	3.29942790730156	1.18152006169464	0.28231156344338	0.999660365730703	-5.01872805543435
P78540	ARG2	0.060472854259126	3.32722829399625	0.994489803807956	0.358566136803139	0.999660365730703	-5.01922138130277
Q8N3V7-2	SYNPO	0.0338170733611445	3.3339204216278	0.336294206616829	0.74815390172599	0.999660365730703	-5.01949864100453
Q9P2K2	TXNDC16	-0.0549535031949153	3.32183590008801	-1.35168461909588	0.225438749826288	0.999660365730703	-5.01967309260469
Q8N2I9-4	STK40	0.0774578869766399	3.28564652662373	0.457340045927638	0.663596450226658	0.999660365730703	-5.01973326503189
Q9NNX1	TUFT1	0.0867638526943378	3.28713677843549	0.626509212661117	0.554164711506465	0.999660365730703	-5.01975640900198
Q9NQ69-4	LHX9	0.0608495114579166	3.31324706437558	0.772087946107281	0.469511703423555	0.999660365730703	-5.01998849766377
Q07021	C1QBP	0.0384866070221405	3.32774038146384	2.14275266088222	0.0760890851785824	0.999660365730703	-5.02034780993086
Q9H6S1-1	AZI2	-0.0734270344500558	3.31787297157815	-1.14229054709505	0.297065642943408	0.999660365730703	-5.02077625634213
Q32NC0	C18orf21	0.0595967412096669	3.32763734280899	1.28541119063839	0.246255701735321	0.999660365730703	-5.02085004014352
Q96C45	ULK4	0.0242252621221745	3.29327844284942	0.200780989713267	0.847535024358657	0.999660365730703	-5.02091939512418
Q8TD17	ZNF398	-0.0603472494355374	3.32944868113737	-1.17706404022296	0.283955314932649	0.999660365730703	-5.02119570928924
Q5H9E4	SLC25A53	-0.0989791717726458	3.16585517007	-0.637877800736197	0.54722300961163	0.999660365730703	-5.02242127364977
Q96C11-3	FGGY	-0.0385139845293237	3.2168858416095	-0.180092250702776	0.863037316008487	0.999660365730703	-5.02265200657214
Q9C000	NLRP1	-0.0663093010754375	3.33100115030483	-0.681446916409742	0.521130477162996	0.999660365730703	-5.0228044020338
P55197-1	MLLT10	-0.0464683779861963	3.33429182542216	-1.52007795243669	0.179545719447373	0.999660365730703	-5.02280842291558
Q7Z309-3	FAM122B	-0.0396348612073394	3.28781451869882	-0.374538317896941	0.720946562628269	0.999660365730703	-5.02284483352217
Q9NSC2	SALL1	0.139675915480193	3.31054360232971	0.923812310937326	0.391392259833218	0.999660365730703	-5.02434675030906
Q96EM0	L3HYPDH	-0.00229062717792724	3.28964219938741	-0.0200677018569924	0.984643214504063	0.999660365730703	-5.02437966525826
Q9UKV5	AMFR	-0.0655508945828395	3.28366823138634	-1.1868336199379	0.280362157024346	0.999660365730703	-5.02483002809599
P54253	ATXN1	0.0580011715254016	3.31634916534453	0.752491402018119	0.480361812126818	0.999660365730703	-5.02508303687235
Q9NXU5	ARL15	0.00248865886438675	3.28751614012382	0.0164744433064749	0.987392629345373	0.999660365730703	-5.02680395280851
Q93050-3	ATP6V0A1	0.0437954198925777	3.29274880918485	1.96613922662785	0.0971063835135406	0.999660365730703	-5.02730067130062
Q6YN16	HSDL2	0.0632018033058582	3.33017614333967	1.59382550662838	0.162329612385372	0.999660365730703	-5.02762826904068
Q9UKJ5	CHIC2	0.101573758253504	3.25518603453627	0.945213252825493	0.381214823366682	0.999660365730703	-5.02787920931472
Q8ND23-1	LRRC16B; CARMIL3	0.0184880019013108	3.28930522346321	0.165958415150305	0.873667038158246	0.999660365730703	-5.0307600320507
Q9P206-2	KIAA1522	-0.0154269558923347	3.30917646498992	-0.0816221397746996	0.937614714274764	0.999660365730703	-5.03139043733312
O95278	EPM2A	-0.0579423347426118	3.28863086700095	-0.639959107636439	0.545958078572862	0.999660365730703	-5.03177292072754
Q11206-4	ST3GAL4	-0.0720297015863438	3.30113834339469	-0.878669142975573	0.41354199310123	0.999660365730703	-5.03296480626339
P36941-1	LTBR	0.0390796272592825	3.19336677218411	0.292561920027532	0.779758195441562	0.999660365730703	-5.03322584171781
Q86TN4	TRPT1	-0.0700425735249995	3.33864642801892	-1.32682479744356	0.233055079336082	0.999660365730703	-5.03333958599897
Q86UX6	STK32C	0.0644375711893844	3.31546810989095	0.72854326314753	0.493854652667374	0.999660365730703	-5.03464839621509
Q9BQ89	FAM110A	0.0395455465838928	3.32878143791575	0.431607413697085	0.68117721290786	0.999660365730703	-5.03475633886178
Q8N587	ZNF561	-0.0437349623646171	3.35052022167747	-0.363148164726822	0.729005192040339	0.999660365730703	-5.03531632095097
Q9Y5J5	PHLDA3	0.0641884622424795	3.30187340523125	0.780392273357919	0.464965909412548	0.999660365730703	-5.03594629870915
Q9BYI3-1	FAM126A	0.014736498466398	3.28927889343686	0.0959037748752209	0.926735080773836	0.999660365730703	-5.03604395862761
Q969W1	ZDHHC16	0.0478281401476942	3.26868386206465	0.466048597066506	0.657698739850284	0.999660365730703	-5.03705407157288
Q96DU7	ITPKC	-0.0570360920496144	3.32115329084506	-1.17254930660572	0.28562907703997	0.999660365730703	-5.0375253964854
P51805	PLXNA3	-0.0438940410802949	3.3112228509741	-0.466073259475958	0.657682075714454	0.999660365730703	-5.03758791726035
Q9NY65	TUBA8; EHHADH	-0.0454141542985506	3.27444741697242	-0.452865032633298	0.666637423833929	0.999660365730703	-5.03778394715015
P0C7X2-1	ZNF688	-0.0586141478085229	3.34066741890263	-0.88958395301427	0.408101679108307	0.999660365730703	-5.03815102824476
Q96JJ6	JPH4	-0.0587819032898611	3.28275752732754	-1.17779967176763	0.283683388953083	0.999660365730703	-5.03816794338243
O15539	RGS5	-0.0639541692680721	3.33156168809668	-1.55214424303112	0.171857993276625	0.999660365730703	-5.03856504014626
Q9NQR1-1	SETD8; KMT5A	-0.0926598191747741	3.36128863798416	-0.773574558265265	0.468695647934309	0.999660365730703	-5.03878904904677
O94875-11	SORBS2	0.0576595556221575	3.33103251830726	0.844808370372723	0.430764315802543	0.999660365730703	-5.03945671161311
Q7L7V1-1	DHX32	-0.0567319707202227	3.30750446465144	-1.21888863435568	0.26884628264235	0.999660365730703	-5.03979249447936
O43184-1	ADAM12	-0.0395455117841587	3.31587038175785	-0.397726884908049	0.704662341056428	0.999660365730703	-5.04030843400218
O94988-4	FAM13A	-0.0926933702370601	3.31927408445262	-1.24518578142827	0.259707715625997	0.999660365730703	-5.04037207580272
Q9BX70-1	BTBD2	-0.0633073074633102	3.31810791882239	-0.703734646602715	0.508100927010059	0.999660365730703	-5.0414255995288
Q99583	MNT	-0.0458804823041181	3.32224775260629	-1.54864256380845	0.172682156112187	0.999660365730703	-5.04192142239458
Q02535	ID3	0.0629367527829254	3.29096715725499	0.977628625136279	0.366193161823003	0.999660365730703	-5.04233705340788
Q7Z699	SPRED1	-0.0276163970611173	3.3289524879636	-0.222488725336392	0.831349399799738	0.999660365730703	-5.04324257940149
Q53S33	BOLA3	0.069270355321686	3.34259997500519	1.19560086290147	0.277170978339733	0.999660365730703	-5.04354028848761
Q67FW5	B3GNTL1	-0.0737167125967041	3.31105128169094	-0.862982133801915	0.421455875857882	0.999660365730703	-5.04354488746791
Q6IPR1	LYRM5; ETFRF1	0.0620154352507428	3.34043240755214	1.0105802138013	0.351406214906087	0.999660365730703	-5.04357131266143
Q96NL8	C8orf37	0.0288697942278229	3.31410885056252	0.219862938431008	0.833302591034269	0.999660365730703	-5.04445132612322
Q9UIU6	SIX4	-0.0204034128544143	3.30676756902061	-0.160307532882728	0.877925184482775	0.999660365730703	-5.04448601546572
Q96FC9-2	DDX11	0.0467130621061356	3.32630011572669	0.440068178644411	0.675371728477039	0.999660365730703	-5.04483697001887
Q7Z3D4	LYSMD3	-0.077343810369619	3.33720571056345	-0.614353430367002	0.561647217283218	0.999660365730703	-5.04510909747595
Q96IK5	GMCL1	0.0447832588571574	3.29523412536046	0.381327499492722	0.716161706971826	0.999660365730703	-5.0451498087337
Q12809	KCNH2	-0.0544513613819174	3.29774411201804	-0.637932057945114	0.547190011026278	0.999660365730703	-5.0453260950828
Q9UQ88-1	CDK11A	0.0101193871907877	3.25950737102349	0.0577180041194432	0.955856515512751	0.999660365730703	-5.046252316222
Q96S99	PLEKHF1	0.00767760168671672	3.33041030088686	0.0701868991025082	0.946336779669302	0.999660365730703	-5.04628331670158
Q92985-4	IRF7	-0.0468433260389214	3.31603049671799	-0.446446003502799	0.67101159074028	0.999660365730703	-5.04669362753902
Q86XJ1	GAS2L3	-0.0521173538619517	3.28464729403492	-0.372528000858477	0.722366062935608	0.999660365730703	-5.04724237660344
Q8TAP9	MPLKIP	-0.062271157500765	3.35051498971839	-0.813259381598809	0.447280078196176	0.999660365730703	-5.04743813715682
Q8N4B1-4	FAM109A	-0.038077067254756	3.30785071969147	-0.361849581735582	0.729926392145162	0.999660365730703	-5.04765723442707
Q969X0	RILPL2	0.0244625024149386	3.28424549901562	0.238324962670723	0.819598131819738	0.999660365730703	-5.04880019225269
P56134	ATP5J2	0.0244431787886069	3.32332237912485	0.132940191444863	0.898608185953945	0.999660365730703	-5.04984224624386
Q9UK80-1	USP21	-0.0599846415777278	3.34533502487565	-0.663308692309792	0.531893827989535	0.999660365730703	-5.04995320393172
Q9ULQ0-1	STRIP2	-0.0474208907229475	3.31453558846956	-0.484844869601528	0.645061446103324	0.999660365730703	-5.05026029993139
Q9HCM9	TRIM39	-0.0624841626470466	3.32550174223705	-0.975669791671696	0.367087486720288	0.999660365730703	-5.05034996061264
Q8WTR4-1	GDPD5	0.0495237661206866	3.29970351831823	0.531130002562604	0.614497845455844	0.999660365730703	-5.05192829326671
Q8N9Z2-1	CCDC71L	-0.0417625020876266	3.32710662351909	-0.421822737488145	0.687921088179404	0.999660365730703	-5.05215553617984
O75716	STK16	0.052945947130781	3.27834992002941	0.642841018309517	0.544209611515608	0.999660365730703	-5.05259107073035
Q6ZV89-1	SH2D5	0.0519969196967009	3.30928041281458	1.1238006371485	0.304243202128684	0.999660365730703	-5.05261870408797
P09105	HBQ1	0.00953875500317422	3.33741507976625	0.0936293180209123	0.928466647527291	0.999660365730703	-5.05295375926131
Q504T8	MIDN	-0.0507082455297462	3.34947923273233	-0.633876234093063	0.549660152524746	0.999660365730703	-5.05315629753122
Q14511-1	NEDD9	-0.083019717566133	3.31181568412009	-0.773837576742449	0.468551371132285	0.999660365730703	-5.05324279181134
Q16828-1	DUSP6	-0.0484195224201698	3.26529487262134	-0.383551900634518	0.714597057834385	0.999660365730703	-5.05326254590025
Q4G0X4	KCTD21	-0.0475545064175537	3.31051038376549	-0.560538600538165	0.5955048646779	0.999660365730703	-5.05381463013322
P08572	COL4A2	-0.0601108510410601	3.32468431148842	-1.18432060563983	0.281282671349981	0.999660365730703	-5.05421263110605
Q9Y5B8	NME7	0.0440513761139736	3.31157835366038	1.72262390706947	0.135978070968886	0.999660365730703	-5.05476918427616
Q969S8-1	HDAC10	-0.0293526308591664	3.31390997611464	-0.253660363117343	0.808267254074143	0.999660365730703	-5.05501279036546
Q9H649	NSUN3	0.0722356113869117	3.32437332011376	1.41356224116754	0.207449920416004	0.999660365730703	-5.05544245113188
Q96JN2-4	CCDC136	-0.0453834343484125	3.29984703360248	-0.48311331036351	0.64622029332588	0.999660365730703	-5.05620223665816
O43715	TRIAP1	0.0343963856843151	3.05595047924832	0.310553787341921	0.766695684534463	0.999660365730703	-5.05644906323971
Q8IX04	UEVLD	-0.0873847896275369	3.26703015518042	-1.01166874434496	0.350926004050544	0.999660365730703	-5.05662255979157
O14508	SOCS2	-0.0466101530370099	3.31455439185936	-0.504378487913624	0.632064826136774	0.999660365730703	-5.05870658829998
P13473-3	LAMP2	0.00726416694080324	3.33147306733556	0.0689733510647154	0.947262898602552	0.999660365730703	-5.05900953244415
Q6PCB0	VWA1	-0.059287622284326	3.31110677275394	-0.450534498931968	0.668223887555258	0.999660365730703	-5.05942899628453
Q9NQ31-1	AKIP1	-0.0167663303258816	3.33124397427044	-0.160511177685282	0.877771651840648	0.999660365730703	-5.05985504662409
Q52LW3	ARHGAP29	-0.0746721548586467	3.29774167543993	-0.75911632778155	0.476674470174045	0.999660365730703	-5.06023376056819
A7MBM2	DISP2	-0.0426732462411203	3.31083959691464	-0.411879615631718	0.694806567908442	0.999660365730703	-5.06028800493901
Q9NP81-1	SARS2	0.0702348250613864	3.32758539258389	1.78806520059845	0.124230344004078	0.999660365730703	-5.06033033434873
Q86V85	GPR180	-0.12560948449345	3.33612788899834	-0.923690520799886	0.391450771930411	0.999660365730703	-5.06049278264902
O60304	ZNF500	-0.0347822295622085	3.37225915823957	-0.318932802680689	0.760640601272601	0.999660365730703	-5.0610079111685
Q96IR2	ZNF845	0.02456572726887	3.33536983823046	0.185584970676133	0.85891470760585	0.999660365730703	-5.06130280346117
P30926-1	CHRNB4	-0.0236287640787189	3.29964448446134	-0.176914809964514	0.865424343654232	0.999660365730703	-5.06130666425843
Q99956	DUSP9	-0.055274419614432	3.31950191644683	-1.36658803143664	0.220981121585417	0.999660365730703	-5.06138794707647
Q4VC05-2	BCL7A	-0.0596494390986793	3.30762841366078	-0.628661956088756	0.552846051794472	0.999660365730703	-5.06153889994536
Q96LU5	IMMP1L	0.0693556431905497	3.30084712377675	0.629338759712792	0.552431880086884	0.999660365730703	-5.06162680425701
Q8N6Q8	METTL25	0.0183629120316067	3.30438018949441	0.184167335759549	0.859978264466633	0.999660365730703	-5.06188258031029
Q9P0P0	RNF181	0.093446785505691	3.21951414985616	1.1796771424518	0.282990393607012	0.999660365730703	-5.06216161200802
O60293	ZFC3H1	-0.051618158333895	3.321134349035	-1.96664938746198	0.0970378771666478	0.999660365730703	-5.0633146311928
Q05586-5	GRIN1	-0.0525278820734951	3.3292158932854	-0.377093392886487	0.719144163961982	0.999660365730703	-5.06340364795381
Q9H920	RNF121	0.00834300162864141	3.30615807520595	0.0730258780848892	0.94417057561929	0.999660365730703	-5.06370290071789
Q9NX61	TMEM161A	-0.109847571571156	3.30231733760534	-0.902759196134254	0.401606858689959	0.999660365730703	-5.06425757469686
Q02363	ID2	-0.142920690638083	3.2825709775467	-0.425450362692885	0.685417107995901	0.999660365730703	-5.06449378534429
Q8N183	NDUFAF2	0.0583344315782614	3.34381859711881	1.86825249348653	0.111190780488878	0.999660365730703	-5.0650795536045
Q9HCU4	CELSR2	-0.0666241885775825	3.3304211914414	-1.45532328653033	0.196062424744302	0.999660365730703	-5.06526152423395
O75037	KIF21B	0.0659137890595266	3.29999284572003	0.531819831169571	0.6140484693237	0.999660365730703	-5.0653666004073
Q86SQ0-1	PHLDB2	0.0360351122413155	3.31310846421897	0.408510249234829	0.697147117158332	0.999660365730703	-5.06542558255489
Q13286-1	CLN3	0.0429583105466991	3.29683670909594	0.241840308673195	0.816996403755193	0.999660365730703	-5.06570398992217
Q8IWP9	CCDC28A	0.0401148964825095	3.32912531064934	0.435796234027736	0.678299961707961	0.999660365730703	-5.06661462562047
Q16659	MAPK6	-0.0557144282083132	3.34446719303305	-0.877971437993883	0.413891596164622	0.999660365730703	-5.06758359703124
Q9ULX9-1	MAFF	-0.0962811374033465	3.28066148873143	-0.218978209801411	0.833960991256296	0.999660365730703	-5.06828268606465
Q9Y462-3	ZNF711	-0.0643180562316022	3.31789824506647	-1.15434749826401	0.292462816051595	0.999660365730703	-5.06916222727217
Q6ZMS4	ZNF852	-0.0546669240786149	3.37077267420132	-0.896622076015094	0.404622373261668	0.999660365730703	-5.06926198581657
Q9BXP2-1	SLC12A9	0.00416283705605539	3.3190365577878	0.0282095103338717	0.978414355795147	0.999660365730703	-5.06993484202881
P31249	HOXD3	0.0836043700143855	3.18550715346394	0.400784907901664	0.702527354359282	0.999660365730703	-5.06994734931831
Q96CS7-2	PLEKHB2	-0.0674318934461719	3.3345047770118	-0.479766918813841	0.648462953915292	0.999660365730703	-5.07007592121695
Q9H2S9	IKZF4	-0.0458545794791975	3.35030878865464	-0.43566115838179	0.678392651159272	0.999660365730703	-5.07036292783527
Q96I27-2	ZNF625	-0.0136383834779966	3.3382058053521	-0.127598434548232	0.902656033132542	0.999660365730703	-5.07151330841884
Q9P0R6	GSKIP	0.0876890406005434	3.27805066899279	1.03680516702089	0.339983093211594	0.999660365730703	-5.07242560633042
Q14934-2	NFATC4	0.0534114150790359	3.32056333234596	0.867562131991318	0.41913375363105	0.999660365730703	-5.07273357529067
Q9Y4C4	MFHAS1	-0.0625162373659439	3.25450650088448	-0.670222485747792	0.527774338416098	0.999660365730703	-5.07288823956666
P49796-3	RGS3	0.0211461181241994	3.26516937398127	0.203268370994819	0.845676077181477	0.999660365730703	-5.07302086199241
O94763-1	URI1	-0.0601200390261166	3.31191426752996	-0.642688437284557	0.544302094525028	0.999660365730703	-5.07305951218104
Q9NX04	C1orf109	-0.0723371379391538	3.32109378271858	-0.61740357053061	0.559763887650812	0.999660365730703	-5.07308960784209
P31273	HOXC8	-0.0667890375892912	3.34372562192003	-1.1203297382685	0.305606705007972	0.999660365730703	-5.07448331790263
Q9H426-2	RIMS4	0.0569673788610817	3.32613064504408	0.946853849936594	0.380443170183206	0.999660365730703	-5.07470008561389
P35442	THBS2	0.0580538984127564	3.3057567907639	0.693000557435932	0.514349010961377	0.999660365730703	-5.07489276802093
P30084	ECHS1	0.0773182498402687	3.3279095905988	1.95182516561713	0.0990485058086173	0.999660365730703	-5.0749460273668
Q8IY57-5	YAF2	-0.0511489997848628	3.33882537421488	-0.582806969368489	0.581351634610529	0.999660365730703	-5.07583554695692
Q9ULD0	OGDHL	0.051019775201761	3.31953934642264	1.15710671089732	0.291418022206847	0.999660365730703	-5.07603402041174
Q9NRW3	APOBEC3C	-0.00293576935810761	3.33749229385442	-0.0255024334808537	0.980485232777929	0.999660365730703	-5.07636517791045
O75154-3	RAB11FIP3	-0.0159064779809521	3.28938410003154	-0.141491466174205	0.892135265281538	0.999660365730703	-5.07641946774383
Q9NXG6-3	P4HTM	0.00966427969903596	3.32865466678486	0.0849454212624038	0.935081650216178	0.999660365730703	-5.07777411506285
P17040-1	ZSCAN20	-0.0471398354829663	3.32771461527562	-0.591530209652042	0.575862050317264	0.999660365730703	-5.0784649819108
Q9HCK0	ZBTB26	-0.0634888735825467	3.33968298107055	-1.06380276919289	0.328540091197514	0.999660365730703	-5.07864394418498
Q09161	NCBP1	0.045556465436666	3.30494800741156	2.01172094619017	0.0911740016245778	0.999660365730703	-5.07867524267108
A6NK58	LIPT2	-0.0359685870264496	3.33522605790469	-0.356585161531384	0.733665964794455	0.999660365730703	-5.07891781170468
Q14774	HLX	0.0386705076866721	3.31136067947213	0.453174050470246	0.666427207863967	0.999660365730703	-5.07895714251137
O43257	ZNHIT1	0.0539039048827792	3.18768689084995	0.0887561781412728	0.932178051825667	0.999660365730703	-5.07966564950188
Q16880	UGT8	-0.175947043430241	3.31637759600999	-0.823632340585395	0.441799984581478	0.999660365730703	-5.08039071196251
Q9HCB6	SPON1	-0.0322965166774608	3.32812783675165	-0.369862953264386	0.724249743248944	0.999660365730703	-5.08072113157445
Q14142	TRIM14	-0.00828602587518267	3.26833877923644	-0.0770226737143892	0.941121824157697	0.999660365730703	-5.08155784819633
Q5RL73-2	RBM48	0.0227409370863164	3.30331359547733	0.210958900092285	0.839935498224124	0.999660365730703	-5.08226089454022
P12694	BCKDHA	0.0424031843427288	3.33389899403469	1.82291411060241	0.118387327243825	0.999660365730703	-5.08229891713429
O43861-1	ATP9B	0.00804415551033066	3.33105959442022	0.0736845396402277	0.943668076334766	0.999660365730703	-5.08254856608952
P54252	ATXN3	0.0589020417194086	3.30354293071166	1.26189000228848	0.254044976952794	0.999660365730703	-5.08282251198714
Q16143	SNCB	-0.150028283834463	3.35073999443095	-1.07347985823253	0.324516040823722	0.999660365730703	-5.08282769253812
Q13496	MTM1	0.0525941191949866	3.32468622827515	0.569355760350939	0.58987706175344	0.999660365730703	-5.082911457616
O75173	ADAMTS4	-0.0557407578536484	3.32773787802632	-0.535538395503142	0.611629247322263	0.999660365730703	-5.08298500341206
Q969H0	FBXW7	-0.0616201159134862	3.35041881100542	-0.757228355636292	0.477723284692124	0.999660365730703	-5.08349945837276
P18858	LIG1	0.0561762278093192	3.31959533251354	1.22889589496954	0.265336136795727	0.999660365730703	-5.08355171790905
Q9UI95	MAD2L2	0.0554856578503823	3.29236136055576	1.26799459681534	0.252002767779932	0.999660365730703	-5.0841161002467
P56277-1	CMC4; MTCP1	-0.00376152660012596	3.38185229088789	-0.0241149406005811	0.981546711774399	0.999660365730703	-5.08443863708468
O75356	ENTPD5	-0.0301024024365741	3.31128267713634	-0.241853597708692	0.816986573290736	0.999660365730703	-5.08459346454183
Q96CD2-1	PPCDC	0.0502912541895017	3.33001438288372	0.617480968438887	0.559716148335425	0.999660365730703	-5.0853874614804
Q9H2X6-1	HIPK2	-0.0297561514159317	3.30772500020866	-0.30774347836806	0.768730631118284	0.999660365730703	-5.08676541144103
Q9BYC8	MRPL32	0.0977820375702929	3.31967318942591	1.54031390529408	0.174657422030269	0.999660365730703	-5.08765227361984
Q92543	SNX19	0.0403247094445308	3.23479432419172	0.227819815144418	0.827387947574071	0.999660365730703	-5.08794891381236
P49768-1	PSEN1	-0.0286608788341045	3.3228312943107	-0.174907372298352	0.866933220844094	0.999660365730703	-5.08813179539895
Q9Y2P8	RCL1	0.0712735060560251	3.33423770884442	1.61365991552416	0.157973966432077	0.999660365730703	-5.08931990535041
Q14CZ0	C16orf72	0.0437855387380068	3.31102759595731	0.509699557073477	0.628549037454438	0.999660365730703	-5.08976782104537
Q8N157-1	AHI1	0.024258469966153	3.30238110153537	0.273166701023145	0.793928350800845	0.999660365730703	-5.0898213618278
Q8NBK3	SUMF1	0.0175609381722786	3.33343659766111	0.183933282623589	0.860153889984837	0.999660365730703	-5.09006955757526
P09630-1	HOXC6	-0.0592175103414369	3.33424069418038	-1.01614779396755	0.348955589403201	0.999660365730703	-5.09130422612644
Q5H8A4-1	PIGG	0.0205119841908014	3.32344004338767	0.198468979716106	0.849263873595743	0.999660365730703	-5.09167467033943
Q9NS23	RASSF1	0.065342277128246	3.28678118522273	0.591218146626003	0.576057897452442	0.999660365730703	-5.09211250488959
Q8IZD0-2	SAMD14	-0.0618996756594562	3.32342316986554	-0.687706542431994	0.517449127467761	0.999660365730703	-5.09218798001049
Q9H5J8	TAF1D	-0.0501236518227534	3.32400094816577	-1.1498833098422	0.294159949049806	0.999660365730703	-5.09280136758826
Q9UQR1	ZNF148	-0.0410471065297924	3.33920896174365	-1.77131552515905	0.127138854701292	0.999660365730703	-5.09337676608409
Q9BWM5	ZNF416	0.0294757496928761	3.36875920428267	0.320524702998018	0.75949230069124	0.999660365730703	-5.09392725651261
O96006	ZBED1	-0.0495709461702948	3.3250314753264	-1.23559778277489	0.263007759838255	0.999660365730703	-5.09415085694024
Q9H0I2-1	ENKD1	-0.0530753424789286	3.33036332489548	-0.957958745718349	0.375251941570337	0.999660365730703	-5.09438164287103
E7ETH6	ZNF587B	-0.0907251643147487	3.33047664450688	-0.937057446813009	0.385068955622326	0.999660365730703	-5.09474980443613
Q96H86	ZNF764	0.0427008512662816	3.28808885833427	0.436006081981363	0.678155975444482	0.999660365730703	-5.09476375130097
Q02386	ZNF45	-0.0966728716011242	3.30355800792536	-0.667087711597193	0.529639593781078	0.999660365730703	-5.09487998106643
Q9Y4D2	DAGLA	0.045443632029764	3.30013591874995	0.373938476049526	0.72136998823883	0.999660365730703	-5.09505992495183
Q6P2D0-1	ZFP1	-0.104510339276908	3.35417715428154	-1.07252530826424	0.324911161898631	0.999660365730703	-5.09520178199454
Q86UT6	NLRX1	-0.0194368673148087	3.3061790014986	-0.176269660375386	0.865909198528383	0.999660365730703	-5.0961910470838
Q9NR33	POLE4	0.0210814014552961	3.29290674584552	0.23150170788155	0.824655230371136	0.999660365730703	-5.09633478069302
Q92484	SMPDL3A	-0.0833342039369508	3.28622029879509	-0.693747699364436	0.513912479883753	0.999660365730703	-5.09642196607731
Q9H1U4	MEGF9	0.00365809418193758	3.27541659503567	0.034194720412309	0.973836432071444	0.999660365730703	-5.09828756130465
P48029-1	SLC6A8	0.0425836760608059	3.3046022899581	0.346819927867717	0.740623881936948	0.999660365730703	-5.09861110870171
Q9Y274-1	ST3GAL6	0.0578460898373829	3.30745278692457	1.22635153978274	0.266224792627214	0.999660365730703	-5.09939356026775
Q86YH6-1	PDSS2	0.0709467014545611	3.33853007717509	1.47055763510541	0.192054106984398	0.999660365730703	-5.09961643429483
Q13492-1	PICALM	0.0630969473402416	3.30246683860523	1.73230357501762	0.134174356819006	0.999660365730703	-5.10071722018998
P16415	ZNF823	-0.0430094926793392	3.30544956657965	-0.382804521308597	0.71512259701223	0.999660365730703	-5.10086134676697
Q9BTV7	CABLES2	-0.0592970024032887	3.33221347481655	-0.79670829888438	0.456125145284813	0.999660365730703	-5.10131378186048
Q9Y2K2	SIK3	-0.0765675736885815	3.3823948623403	-0.712680004642239	0.50293272692939	0.999660365730703	-5.10142539400756
Q96PX8	SLITRK1	-0.0249552155398465	3.29566145319151	-0.221055402001093	0.832415414381511	0.999660365730703	-5.10217236570771
Q5VUG0	SFMBT2	-0.0173411485450431	3.32047664875153	-0.175427922451341	0.866541893397811	0.999660365730703	-5.10272354912485
Q9ULQ1-3	TPCN1	0.0425256955263688	3.33299170316642	0.434953178891937	0.678878570454413	0.999660365730703	-5.10276164741049
O60308	CEP104	-0.0171861157594639	3.32883356970935	-0.164023778438879	0.875124343110659	0.999660365730703	-5.10319337860384
Q5SWA1	PPP1R15B	-0.0484087370055148	3.31603309767071	-0.601811880495737	0.569431750533806	0.999660365730703	-5.10334462171164
Q6NW40	RGMB	-0.0786574933274723	3.32463591055253	-0.835314709750759	0.435686630485528	0.999660365730703	-5.10466256308654
P06753	TPM3	0.0568592195661655	3.32999806083941	0.716828705088381	0.500547790392836	0.999660365730703	-5.10533460065293
Q5T6F0	DCAF12	-0.0518901049961328	3.34137354893585	-1.19676045081831	0.27675125264033	0.999660365730703	-5.10561759189794
Q6ZUT6-1	C15orf52; CCDC9B	0.0297091834701107	3.33214341868478	0.352596642197355	0.736504557341568	0.999660365730703	-5.10701017672897
Q13352-5	ITGB3BP	-0.057085297050448	3.33151394310098	-0.971564736037649	0.368967279739577	0.999660365730703	-5.10770111963469
Q5T7M9-1	FAM69A	-0.0283323046567257	3.32650285405234	-0.281682836872752	0.787695442988307	0.999660365730703	-5.10810883666995
Q53S58	TMEM177	-0.0529839936297654	3.30485533170286	-0.508385184940865	0.629416494289826	0.999660365730703	-5.10875435278148
Q13064	MKRN3	-0.0537219993203742	3.33533552436393	-0.792959502517463	0.458145768411301	0.999660365730703	-5.10892268432564
Q13439-5	GOLGA4	0.0309449704444299	3.332357307285	0.320895847067045	0.759224676350677	0.999660365730703	-5.1090510852367
Q96HA1-1	POM121	-0.0629462569873568	3.34145773161163	-0.72495778724235	0.49589675992974	0.999660365730703	-5.10907825681949
Q92973-1	TNPO1	0.0334056918272356	3.32074693733732	2.02083856615977	0.0900320627288361	0.999660365730703	-5.10972790311439
Q8TER5	ARHGEF40	-0.0210029016875899	3.32570387524482	-0.197401218263418	0.85006262371897	0.999660365730703	-5.10983179370678
Q9UBV7	B4GALT7	-0.0381331743815429	3.29467459327073	-0.397639837037836	0.704723157666209	0.999660365730703	-5.11040520060491
Q5BJH7	YIF1B	-0.00579770692792154	3.32357983593013	-0.0324512893019062	0.975169830529211	0.999660365730703	-5.11134683015342
P58340-1	MLF1	-0.081567792429919	3.29317035284326	-0.777971163672577	0.466288016766674	0.999660365730703	-5.11177585972983
Q00597	FANCC	-0.00293780134579146	3.31456657256178	-0.0292029604877764	0.977654425302287	0.999660365730703	-5.11265183465881
Q13216-1	ERCC8	-0.0542499360336384	3.30815636106395	-1.23736469789391	0.262396874216649	0.999660365730703	-5.11424178392165
Q8WWI5	SLC44A1	-0.09977227784546	3.30485861348672	-0.70244751421982	0.508847470125442	0.999660365730703	-5.11462719894146
Q9BVC4	MLST8	-0.0377644533287348	3.32994731978105	-1.61663731368385	0.157329842827709	0.999660365730703	-5.11530200173238
P01034	CST3	0.0546571495984841	3.32223300237401	0.691638507302946	0.515145441767726	0.999660365730703	-5.11549477154325
Q5T8I3-1	FAM102B	-0.0833845035367388	3.32247759666761	-1.09282494547875	0.316593558499008	0.999660365730703	-5.11634022837453
Q96LL9	DNAJC30	-0.0151691655522582	3.36598202591513	-0.127661073244344	0.902608548248255	0.999660365730703	-5.11658186327897
Q5TA45-1	CPSF3L; INTS11	-0.0445805055865241	3.31564214330165	-1.6751447607953	0.14517224021722	0.999660365730703	-5.11673028979294
Q8IVF5-2	TIAM2	-0.0140401519693456	3.31547307035346	-0.134202063043282	0.897652455343589	0.999660365730703	-5.11683633473709
Q14872	MTF1	-0.0935753222846833	3.39958489879532	-0.91185972220392	0.397166756478159	0.999660365730703	-5.11747487677303
Q9NUU6	FAM105A	-0.0739041347082658	3.2923407116977	-0.684910896762823	0.519091164684151	0.999660365730703	-5.11762835748218
Q96F25	ALG14	-0.0285926768264584	3.28876202817206	-0.298213263763904	0.775646438272783	0.999660365730703	-5.11894483198215
Q9Y6X2	PIAS3; LOC101060431	-0.0629307503018395	3.32299208776113	-1.09719481581985	0.31482632608225	0.999660365730703	-5.11949523277885
P22830-2	FECH	0.0655521788246096	3.3179627154965	1.49936814436703	0.184681258694101	0.999660365730703	-5.12026566118405
P0CK96	SLC35E2B	0.0168127463823974	3.28554321125989	0.15286092562444	0.883543302176234	0.999660365730703	-5.12071597375215
Q15700-4	DLG2	0.048782299538754	3.29959512963736	0.48308250048307	0.646240922734763	0.999660365730703	-5.12199347573913
O43670-4	ZNF207	0.0414374115166422	3.32309784750197	1.57990794371875	0.165453980215079	0.999660365730703	-5.12236041463709
Q9ULH4	LRFN2	0.0536988511236484	3.30285494374897	0.33993649131133	0.74554473638293	0.999660365730703	-5.12353969757446
Q9H6W3	C14orf169; RIOX1	-0.0565297999774141	3.31342262860476	-1.12482940387784	0.303840046121333	0.999660365730703	-5.12438003375457
P46100	ATRX	0.0305892090576095	3.32302131086528	0.344084460844117	0.742577826534206	0.999660365730703	-5.12456520601816
O60218	AKR1B10	-0.0917229427278838	3.33127577559358	-0.887655582414254	0.409058903325626	0.999660365730703	-5.12472638574238
Q96NT0	CCDC115	-0.0888957654789927	3.26522380713404	-0.647459446495323	0.541414963349893	0.999660365730703	-5.12503760090695
O15033-1	AREL1; KIAA0317	-0.0586360424086124	3.29904416472459	-0.509510790373373	0.628673579400257	0.999660365730703	-5.12578795026287
Q9H7X7	RABL5; IFT22	-0.0663759626595143	3.31846175514604	-1.22503125453054	0.266686943170766	0.999660365730703	-5.12586985418777
Q9Y5P8-1	PPP2R3B	0.0468198788057461	3.30672857248583	1.21810997475568	0.269121089848506	0.999660365730703	-5.12697692633384
Q9NQZ7	ENTPD7	-0.0390967195253336	3.3198984117853	-0.390696671378966	0.709581727152717	0.999660365730703	-5.12714669643948
Q15672	TWIST1	-0.0603453239598663	3.28096310647603	-0.923788421839973	0.391403736432646	0.999660365730703	-5.12750313002823
Q8IUW5	RELL1	0.02753654451528	3.28283969664122	0.226817368757957	0.828132429142232	0.999660365730703	-5.12805964229872
Q9Y6Q2-3	STON1-GTF2A1L; STON1	-0.00529084343934881	3.26163741681514	-0.0384451105193126	0.970586077568152	0.999660365730703	-5.12827622669627
Q8TAS1	UHMK1	0.0322033833519318	3.2998688627774	0.302931656013727	0.772219564808177	0.999660365730703	-5.12921537794206
Q15776	ZKSCAN8; ZNF192	-0.165261218329885	3.34839062068639	-1.32701242707697	0.232996739665505	0.999660365730703	-5.12946813911223
Q68DI1	ZNF776	-0.0629287345805131	3.34828159170621	-1.44387114667297	0.199126452448928	0.999660365730703	-5.1295928212168
O95210	STBD1	-0.0659714710621376	3.30538251713166	-1.0094099043565	0.351923090754644	0.999660365730703	-5.13110782857689
Q5SNT2-1	TMEM201	-0.257518235575833	3.30629776904938	-1.32819584119812	0.232629082455866	0.999660365730703	-5.13118691448628
P62068-1	USP46	0.0758726761462672	3.31713944289995	1.07845368540592	0.322463606863786	0.999660365730703	-5.13178205360086
Q96HA4-1	C1orf159	0.0448605739895459	3.30336264610909	0.417810944625376	0.69069530293309	0.999660365730703	-5.1319939783906
O75486-1	SUPT3H	-0.0118442407778035	3.31239877266889	-0.0964749316062421	0.926300322193793	0.999660365730703	-5.13204648262092
P53794	SLC5A3	-0.0755313307711976	3.31604334946525	-0.485875508284757	0.644372208847132	0.999660365730703	-5.13256062363943
Q0P5N6	ARL16	0.0240484709818102	3.26090354150799	0.172640421830114	0.868637898756116	0.999660365730703	-5.13261836185373
Q9H972	C14orf93	-0.0522588562292105	3.2390901125663	-0.368686539716446	0.725081918534718	0.999660365730703	-5.13326319399195
Q16595-1	FXN	0.0785218487571964	3.3175311750116	1.43682390249951	0.201033864595176	0.999660365730703	-5.13356498736336
Q86VQ0	LCA5	0.0385753039495388	3.31303988716905	0.508703805568154	0.629206152026459	0.999660365730703	-5.13392185332389
A6NHQ4	C17orf96; EPOP	0.0172177328492314	3.31266710859664	0.205323780096213	0.84414078643686	0.999660365730703	-5.13418969021921
A7XYQ1	SOBP	0.0998911838633364	3.34195849310409	0.69316016199185	0.514255738613055	0.999660365730703	-5.13450078484029
Q16394	EXT1	-0.0238909317356425	3.33653262038075	-0.136177344475232	0.896156773182935	0.999660365730703	-5.13452468146664
P19256	CD58	-0.0360299238238677	3.30577289038452	-0.199713024734385	0.848333500366441	0.999660365730703	-5.13567264387513
Q02833-1	RASSF7	0.0622189338782137	3.27256800780041	0.599230705269456	0.571041964409487	0.999660365730703	-5.13571834955416
Q8TAG5-2	VSTM2A	0.00976483771606373	3.33581025894215	0.0995015108558824	0.923996991396436	0.999660365730703	-5.13581686286768
A8MQ14	ZNF850	-0.0682824053864007	3.30715843895438	-0.401612781036396	0.70194987778385	0.999660365730703	-5.13584582849147
Q9Y2K5-1	R3HDM2	0.0473374385124229	3.31347640096387	0.716819293367544	0.500553192237738	0.999660365730703	-5.13589412091025
P01033	TIMP1	0.0261964807312016	3.29514693564523	0.250640747629423	0.810494430942239	0.999660365730703	-5.13639176299143
Q9Y566-1	SHANK1	-0.040939305479063	3.33874706074021	-0.427633277031087	0.683912451018458	0.999660365730703	-5.13641066438199
Q96IC2	LOC81691; REXO5	-0.0596291346808115	3.33118537253625	-0.53141050314607	0.614315096364267	0.999660365730703	-5.13643063177774
O96004	HAND1	-0.044727012211889	3.3166366373115	-1.42009390999724	0.205629610776547	0.999660365730703	-5.13668275323577
Q5BKX6-1	SLC45A4	-0.0239028612807381	3.30722953940855	-0.117682293323808	0.910178652578305	0.999660365730703	-5.13671019475359
Q8TAC9-2	SCAMP5	-0.0209020021506646	3.29779480895566	-0.185734048702529	0.858802883143129	0.999660365730703	-5.13702433548312
Q9BU23-1	LMF2	-0.114514276246822	3.30130824727426	-0.895317216334172	0.405265731677318	0.999660365730703	-5.13746840777277
P23142	FBLN1	-0.131725637328848	3.35326572284253	-0.916313289119361	0.395007587159715	0.999660365730703	-5.13797601126778
Q9H8X2	IPPK	-0.0452597688176201	3.34463850602263	-0.593183839069137	0.574824917282549	0.999660365730703	-5.13874405706197
Q00013-1	MPP1	-0.0493853899024228	3.33214421954182	-1.17234098095558	0.285706513582424	0.999660365730703	-5.13988970332455
Q969Y0	NXPE3	0.00579402481089861	3.3296171101485	0.061296754644978	0.953123321960148	0.999660365730703	-5.14001941990976
Q86YD5	LDLRAD3	0.0174014590975838	3.27787502542856	0.147825793153933	0.887346313320041	0.999660365730703	-5.14009610644065
Q5T4D3-3	TMTC4	-0.0993397708586623	3.32081460440984	-1.00584571526352	0.353500995723419	0.999660365730703	-5.14118011396843
Q13796	SHROOM2	-0.00951892839091982	3.29666949628323	-0.107987766424516	0.917543047769755	0.999660365730703	-5.14238530303606
P14672	SLC2A4	-0.0720790537840909	3.33466617944967	-0.820439923464102	0.443481354150127	0.999660365730703	-5.1432079354834
O75071	EFCAB14; KIAA0494	0.0145967280014131	3.28014888696015	0.142407043482175	0.891442745770585	0.999660365730703	-5.14327818893648
Q01658	DR1	0.0894280421266477	3.27151503127283	1.00091318898272	0.355694011889983	0.999660365730703	-5.14330331292258
Q9BVG9	PTDSS2	-0.0571143932001772	3.32208991349741	-0.295891175958541	0.77733496701352	0.999660365730703	-5.14337878946503
O60725	ICMT	-0.0931778799015535	3.32867425423272	-0.631503301356115	0.551108580092071	0.999660365730703	-5.14378391139743
Q99717	SMAD5	0.0548798697179206	3.30002094494103	1.30519781370447	0.239867800951571	0.999660365730703	-5.14387133170748
Q92692-1	PVRL2; NECTIN2	-0.0410489744079946	3.301945662575	-0.277976207175348	0.79040621530307	0.999660365730703	-5.14408241178285
P27815-1	PDE4A	-0.0932254625404515	3.34804618071115	-0.947088747227902	0.380332785988638	0.999660365730703	-5.14458928749735
O15083	ERC2	0.0565079814469822	3.31977976369919	0.255903167397064	0.806614303140124	0.999660365730703	-5.14510254899438
Q5TID7	C1orf114; CCDC181	0.015352481435107	3.34882910881329	0.183553353270412	0.86043899474221	0.999660365730703	-5.14532184539896
Q2NKQ1-1	SGSM1	-0.0102685583561512	3.31910706028443	-0.0920397679110454	0.929677043767199	0.999660365730703	-5.14626751487774
Q92685-1	ALG3	-0.0612638296338824	3.26028720988521	-0.376762461731753	0.7193774977669	0.999660365730703	-5.14628331076127
Q16626	MEA1	0.0777247440355349	3.2437356185859	0.86114918169032	0.422387882681156	0.999660365730703	-5.14629493591732
A6ND36-1	FAM83G	-0.024484975942903	3.32044913447879	-0.297903734525601	0.77587143800118	0.999660365730703	-5.14641214860828
Q9HD34	LYRM4	0.102340601317591	3.32715834622098	1.30730485999125	0.239196327536322	0.999660365730703	-5.14664314038068
P09564	CD7	0.0380889135120748	3.29195949418333	0.355671382149716	0.734315887483698	0.999660365730703	-5.14672882619208
Q96SL8	FIZ1	0.0143298068076286	3.30041953888834	0.161961716481808	0.876678225459814	0.999660365730703	-5.14703398014459
O60347	TBC1D12	-0.0539666962703572	3.33938851830573	-0.774501188336254	0.468187490469113	0.999660365730703	-5.14775309004764
H0Y354	FAM72C	0.0152539695846574	3.27797655860851	0.0679888611861045	0.948014278363525	0.999660365730703	-5.14902177502449
Q8WV93	LACE1; AFG1L	0.0881028286481481	3.34263950276548	1.18765737627446	0.280060979789074	0.999660365730703	-5.14936452198807
Q9BV94-1	EDEM2; MMP24-AS1-EDEM2	-0.00746384679527381	3.28244419946368	-0.0805464930424401	0.93843476451854	0.999660365730703	-5.15050243069422
Q96BI3-1	APH1A	-0.121981530792132	3.33067588070329	-0.856712536893018	0.424650126663969	0.999660365730703	-5.15107368125783
Q96C24	SYTL4	-0.0656638848092815	3.30344223024614	-0.717957816367619	0.499900022761446	0.999660365730703	-5.15145218153926
Q5D0E6-1	DALRD3	-0.0560158311860298	3.33377132918333	-0.889566228973475	0.408110469446892	0.999660365730703	-5.15184849863644
Q96G21	IMP4	0.0434266482703294	3.29006273443499	1.46587913109265	0.193276909869231	0.999660365730703	-5.15228253369543
Q13045-1	FLII	-0.0298421846417529	3.27644705742593	-0.291559404492335	0.780488418975323	0.999660365730703	-5.15350776423252
P98182-1	ZNF200	0.0301294070517754	3.25320446103095	0.0918213759795681	0.929843359091198	0.999660365730703	-5.15360530722121
Q8TET4	GANC	-0.0527049852565411	3.32950858727605	-0.765308972575612	0.473245535123127	0.999660365730703	-5.15367567514225
Q9BT43	POLR3GL; LOC101060555	-0.041851130711916	3.34936758875319	-0.349037853808985	0.739041172936632	0.999660365730703	-5.15395370620669
P57060	RWDD2B	-0.0418452481170652	3.28449268755441	-0.26468173991019	0.800155092456642	0.999660365730703	-5.15399825696322
Q5U4P2	ASPHD1	-0.092099167504987	3.30788551121013	-0.883837351310012	0.410959226021166	0.999660365730703	-5.15432075473965
Q7Z698	SPRED2	-0.0621671924641985	3.31030262645546	-0.561295654187588	0.595020435851373	0.999660365730703	-5.15454183288875
P41134	ID1	-0.0128461469398938	3.28075352602057	-0.132694685758946	0.898794151575399	0.999660365730703	-5.15491241930894
Q9H819	DNAJC18	-0.0276609403150428	3.31085653189122	-0.288912108558508	0.7824178653996	0.999660365730703	-5.15542716714933
Q8ND90	PNMA1	-0.0555760846988576	3.32477301290525	-1.3695190043434	0.220113910276316	0.999660365730703	-5.15562198601303
A2A3K4-2	PTPDC1	-0.0436314440868422	3.31750825205563	-0.602692832576938	0.568882815784736	0.999660365730703	-5.15564156574583
O96020	CCNE2	-0.0425848111679208	3.30267365270739	-0.624521078192306	0.555384272124681	0.999660365730703	-5.15739953567189
P17036-1	ZNF3	-0.0783533657848202	3.31383835805905	-1.27194948717594	0.250687450539993	0.999660365730703	-5.15768627299976
Q9UBG0	MRC2	0.0406680996541743	3.30693421949922	1.42121496876809	0.205318661059733	0.999660365730703	-5.1579213361099
Q9UPW8	UNC13A	0.0378435225773836	3.26787020488505	0.200083826969513	0.848056243475411	0.999660365730703	-5.15799540865347
Q7L945	ZNF627	0.0529512461414871	3.2997165871738	0.528472920337471	0.616230466904166	0.999660365730703	-5.15818486622358
P17096-1	HMGA1	-0.0591754934969294	3.37982621255561	-1.39386938489954	0.213027806324211	0.999660365730703	-5.15827412902488
Q969S9	GFM2	0.0675856494818728	3.33912853739903	1.17610412427441	0.28431048325317	0.999660365730703	-5.15871816442407
Q9ULI2-1	RIMKLB	0.0605940422416113	3.26153688919246	0.875444647754374	0.41515956327584	0.999660365730703	-5.15897510006541
Q9GZN2-1	TGIF2	-0.0456923851341269	3.31541852217714	-0.528072334036566	0.616491915673243	0.999660365730703	-5.15902474983116
Q86VZ2	WDR5B	-0.0498523608696896	3.33130477783634	-1.2023233169021	0.274745326423437	0.999660365730703	-5.15922563308239
Q8TAD4-1	SLC30A5	0.109776723611968	3.25682974066803	0.982740962564245	0.363867182702075	0.999660365730703	-5.15931512270173
Q15583	TGIF1	-0.00870669908186645	3.34428332529068	-0.093002822580642	0.928943680731851	0.999660365730703	-5.16015003886559
P32314	FOXN2	0.0428452816580995	3.26719460878151	0.493210849063068	0.639477942274289	0.999660365730703	-5.1604831219034
Q9BUH8	BEGAIN	-0.0849821484389945	3.33053624127615	-0.718975484124009	0.499316673258154	0.999660365730703	-5.16077725165314
O75907	DGAT1	-0.13434286062366	3.29555722720319	-0.889513753356264	0.408136495864653	0.999660365730703	-5.16104958465929
P09601	HMOX1	-0.0567381807986369	3.3160812641679	-1.31003260852434	0.238329538758345	0.999660365730703	-5.16107153751751
P41586-4	ADCYAP1R1	0.0673893763923036	3.28853403722661	0.927969419735645	0.389399075527629	0.999660365730703	-5.16136960650133
Q969U7	PSMG2	0.0393567279120033	3.32235811827706	1.62414599450365	0.155716572412293	0.999660365730703	-5.16191831792437
Q9NQX6	ZNF331	-0.12144703433167	3.32237064162224	-1.09472871706129	0.315822637789063	0.999660365730703	-5.16205999360335
Q9BRR0-1	ZKSCAN3	-0.034927554150318	3.34320033076326	-0.398811065258128	0.703905071576574	0.999660365730703	-5.16228761069533
Q96G75-1	RMND5B	0.009115254003904	3.31626481188462	0.0946722206744744	0.927672621311613	0.999660365730703	-5.16294186969667
P52815	MRPL12	0.0569103446755739	3.33534450688897	1.77631845960318	0.126263180127251	0.999660365730703	-5.16386056173288
Q96NJ6	ZFP3	-0.0342560723637273	3.3129213761581	-0.255150165820621	0.807169145008357	0.999660365730703	-5.16391616744567
Q86TL0	ATG4D	-0.0220652307084679	3.30925107618798	-0.250987116352659	0.810238860544027	0.999660365730703	-5.16402679415399
Q8WXI2-5	CNKSR2	0.0430599535052083	3.31436416522029	0.54615023038945	0.604754956657135	0.999660365730703	-5.16402856403867
Q15759	MAPK11	-0.0576129754687851	3.31504205043641	-0.871269960972072	0.417260825950972	0.999660365730703	-5.1642806317143
Q15928	ZNF141	-0.0219594764170724	3.33297763096679	-0.198942860845536	0.848909444693635	0.999660365730703	-5.1643317993636
O95503	CBX6	-0.0887928692362823	3.2938132710234	-1.22279120871692	0.267472642095916	0.999660365730703	-5.164558670781
Q9HD64-2	XAGE1D; XAGE1E; XAGE1B; XAGE1C; XAGE1A	-0.000325519493691223	3.33125911987001	-0.00312766462625901	0.997606375290121	0.999660365730703	-5.16501056027968
Q13829	TNFAIP1	0.00164648699015442	3.32745629978337	0.0199914135614326	0.984701584937161	0.999660365730703	-5.16553134189926
Q9UJU2-1	LEF1	-0.03095106670955	3.26724401022675	-0.288147390202881	0.782975537245087	0.999660365730703	-5.16564820513917
Q9NQL2-1	RRAGD	0.0817808965388888	3.28502736215212	0.669575474785597	0.528158975452008	0.999660365730703	-5.16626317310818
Q6P4H8-1	FAM173B	0.00632589143196362	3.29462522658936	0.0682614135902494	0.947806255729317	0.999660365730703	-5.16627749037022
Q8IWL3	HSCB	0.0683456129832968	3.3082559144047	1.38132095080518	0.216653134265274	0.999660365730703	-5.16639230495933
O43708	GSTZ1	0.0708871246194222	3.32233015989335	1.42832612291928	0.203356270588337	0.999660365730703	-5.1665861586402
Q8IYR6-1	TMEFF1; MSANTD3-TMEFF1	-0.0237944515186196	3.312088090804	-0.132350766383081	0.899054675445091	0.999660365730703	-5.16692993688758
Q9BYV9	BACH2	0.00574266229501356	3.31921058255704	0.0617372240165813	0.952786970496767	0.999660365730703	-5.16721151648004
P56181-2	NDUFV3	0.0626691420791332	3.35375178910098	1.54554873756991	0.173413429780184	0.999660365730703	-5.16755252055177
Q9ULD5-3	ZNF777	-0.0496299159699883	3.32240759370097	-0.845089751158631	0.430619049730565	0.999660365730703	-5.16782559601487
Q9H992	MARCH7	0.0280001505520851	3.34165457688086	0.256053736588017	0.806503372500735	0.999660365730703	-5.16834863731874
O75365-1	PTP4A3	0.0322321923232346	3.32805182351697	0.388563482982471	0.711077480387116	0.999660365730703	-5.16876015954729
Q6R2W3	SCAND3; ZBED9	-0.0175697047325234	3.29799131611357	-0.192096115002338	0.854034037964131	0.999660365730703	-5.16902664165854
Q12857-4	NFIA	-0.0614987999561852	3.31845051560041	-0.982592839752393	0.363934409832628	0.999660365730703	-5.16916276496194
Q96PV4	PNMA5	-0.0363433343470001	3.28286495346045	-0.347180767635197	0.740366292023483	0.999660365730703	-5.16954089845186
Q9UJJ9	GNPTG	-0.0165430962822381	3.39094520538156	-0.159242327040352	0.878728363194192	0.999660365730703	-5.16963982154732
Q3B820-3	FAM161A	0.0794538333211131	3.26740664298779	1.00825145612308	0.35243532808237	0.999660365730703	-5.16969289311557
Q8WU20	FRS2	-0.00541100914057627	3.30351079399129	-0.0495564504773387	0.96209212574812	0.999660365730703	-5.17036373468289
P57775	FBXW4	0.0118214790925834	3.30006521020039	0.141834097317343	0.891876095494575	0.999660365730703	-5.17094321150533
P07225	PROS1	-0.0452456187768991	3.28816101354825	-0.254423962339639	0.807704357597512	0.999660365730703	-5.17235245777172
Q8IYX8	CEP57L1	0.0385716323244518	3.3277840441061	0.487027445002706	0.643602312446887	0.999660365730703	-5.17258979175732
Q8WYL5-1	SSH1	0.00701826236745271	3.31380396809078	0.0837953287091259	0.935958178448969	0.999660365730703	-5.173491695611
O75157	TSC22D2	-0.0617605706436983	3.34322847468868	-0.868016821661149	0.418903740626064	0.999660365730703	-5.17373970387543
O43903	GAS2	-0.0939524047182104	3.33436437000505	-0.638777019964721	0.546676276362825	0.999660365730703	-5.17387455467215
O14544	SOCS6	0.0430874260924973	3.2981519915111	0.537477028040389	0.610370137160233	0.999660365730703	-5.17423084533749
Q9NQV8-1	PRDM8	-0.0336324637205641	3.34290783134335	-0.388074388868702	0.711420623622028	0.999660365730703	-5.17434058116667
Q96AA3	RFT1	0.00653829057030275	3.29879793571393	0.060348242273706	0.953847661375123	0.999660365730703	-5.1746663201984
Q9NWM3-1	CUEDC1	0.0453623982778987	3.31435457777546	0.47092728370519	0.654406472061293	0.999660365730703	-5.17469946170277
Q9BRT3	MIEN1	0.0627323865173307	3.28156690594692	1.02236415737506	0.346235654273076	0.999660365730703	-5.17479227303795
Q8TD22	SFXN5	-0.0106518406463981	3.3248159447439	-0.093641714780386	0.928457208575669	0.999660365730703	-5.17513172552101
Q8IYY4-1	DZIP1L	-0.0186760315322407	3.33721298698043	-0.196871062185099	0.850459285140832	0.999660365730703	-5.17565640224699
Q4LDG9-1	DNAL1	0.0536976479457302	3.33271417274587	1.27671554776421	0.249110409732764	0.999660365730703	-5.17608263757593
O95822	MLYCD	0.0563894671785152	3.31789044515177	1.12789382852895	0.302641811550271	0.999660365730703	-5.17633563332107
Q8NC44	FAM134A; RETREG2	-0.0657624040203669	3.34455224474058	-0.531224004702099	0.614436598687253	0.999660365730703	-5.17660077582606
Q9UK39	CCRN4L; NOCT	-0.0614241790579749	3.33600585854727	-1.23514235782501	0.263165417637405	0.999660365730703	-5.17674691186709
Q9BSE5	AGMAT	-0.0441643208371285	3.28139242499332	-0.266460404993865	0.798848453962501	0.999660365730703	-5.1771176708833
Q8NBE8	PHOSPHO2-KLHL23; KLHL23	-0.0195849004519199	3.33805318344419	-0.201615539102587	0.846911202270509	0.999660365730703	-5.1775427333366
Q9HAV5-2	EDA2R	0.00358656155858395	3.31346544906929	0.0354949551820338	0.972842055997694	0.999660365730703	-5.17809486585105
Q9Y365	STARD10	-0.0577994910307406	3.32232178407874	-0.868914333523864	0.41844999415859	0.999660365730703	-5.17811781892516
O75197	LRP5	-0.0127210594979481	3.29648676640094	-0.139961722907965	0.89329255698783	0.999660365730703	-5.17848771293282
C9JLR9	C11orf95	-0.050424965141366	3.33853114465698	-0.913289889821917	0.396472404206509	0.999660365730703	-5.17968148274343
Q6V9R5-1	ZNF562	-0.0382153956111929	3.3269372973572	-0.392043890713773	0.708637811662727	0.999660365730703	-5.17986916590808
Q07817-1	BCL2L1	0.0328958535402278	3.30071385429175	0.441593661558652	0.674327580434519	0.999660365730703	-5.18005569898536
P49810-1	PSEN2	0.097439496744125	3.29565125247785	0.744439511104688	0.484869839294898	0.999660365730703	-5.18116478496647
Q13362-4	PPP2R5C	0.0344385120332498	3.16811214295799	0.157787034282336	0.879825928221322	0.999660365730703	-5.18128730128092
Q96AK3	APOBEC3D	0.00491806607663045	3.31506188950774	0.0555438944388137	0.957517269201874	0.999660365730703	-5.18212699624965
Q9UHK6-5	AMACR	0.0162809244011785	3.29711905272332	0.152826834409709	0.883569039786878	0.999660365730703	-5.18237824504984
Q9GZU7-1	CTDSP1	-0.0616973778431138	3.31218847533119	-0.439689192086202	0.675631256640124	0.999660365730703	-5.18246085198972
Q9BVG8-6	KIFC3	-0.0270796706817284	3.3013351020653	-0.280363141425202	0.788660205215331	0.999660365730703	-5.18286559790353
Q8WVF1-1	OSCP1	0.000439573613966333	3.3226500467991	0.00520305216596433	0.99601807935919	0.999660365730703	-5.18315336668472
Q9NR81-2	ARHGEF3	-0.0289356218883372	3.29950833111782	-0.296149986292583	0.777146704267168	0.999660365730703	-5.18396905993107
Q13761-2	RUNX3	-0.0263525423644554	3.32583886814031	-0.346588783083336	0.740788906877746	0.999660365730703	-5.18421344475534
Q86YV9	HPS6	0.059087018444866	3.28874924491555	1.49904356165746	0.184762831040835	0.999660365730703	-5.18424631865596
Q9NYZ3	GTSE1	-0.0476141029686262	3.34885108021847	-1.57910990009412	0.165634856132323	0.999660365730703	-5.18426508663189
Q9HBT8-2	ZNF286A	-0.0450743593026027	3.34383164290339	-0.676158161027598	0.524254138279828	0.999660365730703	-5.18454204706678
Q5T0F9-2	CC2D1B	0.056092892538522	3.30561424370755	1.19242538926088	0.278323185000511	0.999660365730703	-5.18468024896673
Q7Z3I7	ZNF572	0.0535997606526582	3.25290272035206	0.213395254642982	0.838119118231955	0.999660365730703	-5.1852807644596
Q8TAM2-4	TTC8	0.0857210091711088	3.25934783712228	0.926178153680335	0.390256962932923	0.999660365730703	-5.18637293717395
Q53GI3	ZNF394	0.0323366928946902	3.33498338113595	0.25925584122265	0.804145421230167	0.999660365730703	-5.18640218242367
Q9HB90	RRAGC	0.0523246132054383	3.30749806399184	1.32786084878512	0.232733103402253	0.999660365730703	-5.18666030626666
Q8TCT0	CERK	-0.0578137089732043	3.33747475399712	-0.77433692913898	0.468277540866439	0.999660365730703	-5.18688227259456
Q8NE62	CHDH	0.0557881340356148	3.33184830439938	1.13874648326566	0.298430223794045	0.999660365730703	-5.18733473410825
Q14129	DGCR6; LOC102724770	-0.020029742193579	3.32604761845413	-0.256005767092651	0.806538713104347	0.999660365730703	-5.18763719677627
Q9BT17-1	MTG1	0.0697254343165174	3.31842425153052	1.41533807034398	0.206953557421936	0.999660365730703	-5.18765935010647
Q8TBF5-2	PIGX	-0.106642165400739	3.33068434012897	-0.922101242144481	0.392214931541637	0.999660365730703	-5.18816356751194
Q96ST8	CEP89	0.00594319770886453	3.32508494821724	0.0667849886422422	0.948933174439715	0.999660365730703	-5.18837561953681
Q9UQ03-1	CORO2B	-0.0542471946606801	3.31314802219932	-0.401334827378315	0.702143737915812	0.999660365730703	-5.18883010973559
B7U540	KCNJ18	-0.00125298493205138	3.30582364803415	-0.0104571242507796	0.991997241055791	0.999660365730703	-5.18904884094167
Q9BTT6	LRRC1	0.027245963587209	3.33943031421428	0.217948710238049	0.834727313538263	0.999660365730703	-5.18922333103593
Q969W8-2	ZNF566	-0.0486832760844527	3.32751509121457	-0.849968765677667	0.428105929172227	0.999660365730703	-5.18928527974677
Q02410	APBA1	-0.0396989856549976	3.34687799975865	-0.496135236018827	0.637532256634573	0.999660365730703	-5.1892961239287
Q7Z6J6-1	FRMD5	0.0159863463674025	3.28244794949893	0.183741040603152	0.860298148429109	0.999660365730703	-5.19061028098611
Q9H8G1	ZNF430	-0.0506704547596585	3.33157447450016	-0.875056393399911	0.415354650472323	0.999660365730703	-5.19063821968005
Q9H1K1	ISCU	0.0787682757659105	3.3440245238918	1.51200412219486	0.181531713829629	0.999660365730703	-5.19084699942375
P21579	SYT1	0.062674054864279	3.29212857243531	1.29453126244514	0.243292843020178	0.999660365730703	-5.19113836593765
A0PJW6	TMEM223	-0.00956335720221114	3.32516908898155	-0.0483801716449222	0.962991083271218	0.999660365730703	-5.19152859000625
Q9NX05-1	FAM120C	0.00819596911850045	3.3471961313895	0.100336870203242	0.923361395547074	0.999660365730703	-5.19180562587176
Q86UQ0-1	ZNF589	0.0555607888076671	3.3135475694559	0.616973846746118	0.560028988400708	0.999660365730703	-5.19191681033245
Q9BV10	ALG12	-0.125041847511696	3.27782760343459	-0.607780108176044	0.565719135945917	0.999660365730703	-5.19254108515789
Q14728	MFSD10	-0.0395887640713168	3.2692301493888	-0.285307349636339	0.785047876600571	0.999660365730703	-5.19259494182817
Q9UJC5	SH3BGRL2	-0.042679615495911	3.31784998514999	-1.27895954164422	0.248370935686402	0.999660365730703	-5.19317024310491
Q96BD5-2	PHF21A	0.00725112322326895	3.28424855373383	0.0725469502882389	0.944535971995038	0.999660365730703	-5.19326462340098
Q8NBA8	DTWD2	-0.112518477671745	3.37197367469878	-0.770706676184987	0.470270824368212	0.999660365730703	-5.19366181027563
Q14995	NR1D2	-0.049644653491831	3.31068177876842	-0.907337446765452	0.39936845077854	0.999660365730703	-5.19391233566144
Q99569	PKP4	-0.056286294687283	3.30426387048823	-1.15907574053291	0.290674378642127	0.999660365730703	-5.19497501992158
Q8IUH4	ZDHHC13	-0.00268963938465135	3.28279485529755	-0.0311371802914656	0.976174936402982	0.999660365730703	-5.19529930386837
Q96PE7	MCEE	0.0590591054109137	3.33755931432376	1.13894628067141	0.298353154557399	0.999660365730703	-5.19537619346453
O15254	ACOX3	0.0319803260379672	3.30980939951891	0.315138367945033	0.763380371214381	0.999660365730703	-5.19620471006183
Q9NX00	TMEM160	0.0389480386302512	3.31911381041036	0.260730016647728	0.803060632440007	0.999660365730703	-5.19636211797653
Q99941-1	ATF6B	-0.0950071915294748	3.31172397837219	-0.869603330343927	0.418101913380866	0.999660365730703	-5.19794722880469
Q06945	SOX4	0.0883842569598508	3.336414365488	0.818540194264523	0.444484091966934	0.999660365730703	-5.19825784354754
Q5SZL2	CEP85L	-0.0204732138756702	3.31274850159738	-0.211552331198316	0.839492976275136	0.999660365730703	-5.19860540481966
Q9Y5W9	SNX11	-0.0643618319590963	3.33159823797813	-1.29015021574889	0.244712151925939	0.999660365730703	-5.19883391893218
P84074	HPCA	0.0855792710140263	3.25824006652782	0.746571934125802	0.483673133330248	0.999660365730703	-5.19890719875614
Q8N4L2	TMEM55A; PIP4P2	0.0546520204757564	3.24294472468559	0.525204380954207	0.618365529405164	0.999660365730703	-5.19929987682948
Q9HCI5	MAGEE1	-0.0220335802279579	3.29142718279306	-0.220345484049028	0.832943551138237	0.999660365730703	-5.20004038783315
Q6UX04	CWC27	-0.0513678009443268	3.36166072970411	-1.53887352158965	0.175001184428073	0.999660365730703	-5.20012473192662
Q969T3	SNX21	-0.0424680314314962	3.30272318746374	-0.199499181542618	0.8484934063982	0.999660365730703	-5.20018095474715
P82921	MRPS21	0.050967724844318	3.32431747837374	0.703967213739944	0.507966114637284	0.999660365730703	-5.20037369117994
Q8NAN2-1	FAM73A; MIGA1	-0.0475374416960172	3.29381160090646	-0.330963961764596	0.751978840156498	0.999660365730703	-5.20042393560586
Q9NQB0-6	TCF7L2	0.0495944864178331	3.331007336402	0.495632665861512	0.637866407471358	0.999660365730703	-5.20075895228952
Q8IUW3	SPATA2L	0.00261325067377653	3.31305602179996	0.0331494112203942	0.974635887102591	0.999660365730703	-5.20092330423179
Q99836-6	MYD88	-0.0583375067508738	3.30940695123516	-0.880868831868696	0.412441232269512	0.999660365730703	-5.20243089479553
O14939-1	PLD2	-0.0512630097125935	3.30159127700918	-0.886925707309764	0.4094216473948	0.999660365730703	-5.20264789631354
Q14978-2	NOLC1	-0.0320575891935537	3.30733809201119	-0.450326330815053	0.668365685452514	0.999660365730703	-5.20276544401998
Q9BV79	MECR	0.0468417557673804	3.32322176983051	1.3050345153889	0.239919910939051	0.999660365730703	-5.20286761530156
P17181-1	IFNAR1	0.0599243731236911	3.24968033391738	0.734874731216298	0.490262518132551	0.999660365730703	-5.20313911472805
Q8N448	LNX2	0.0521272024327728	3.30444535076288	0.894220157374509	0.405807233366616	0.999660365730703	-5.20349029807836
Q03060-15	CREM	-0.0616086470730232	3.33119632401807	-1.06080283255888	0.32979585302554	0.999660365730703	-5.20368131169452
Q9BZG1	RAB34	0.0639895426688257	3.23722418378293	0.707839354960461	0.505725045019487	0.999660365730703	-5.20393312479842
O60779	SLC19A2	-0.0949152215859904	3.3424627895809	-0.411582109430359	0.695013084285934	0.999660365730703	-5.20422484737274
Q8IWT0	ZBTB8OS	-0.0532410709516919	3.32580701487235	-0.607276373972508	0.5660319204303	0.999660365730703	-5.20436331796151
Q15040	JOSD1	0.00127770625186118	3.32987388937023	0.0129237923627122	0.990109629394531	0.999660365730703	-5.20459333316927
Q8TCC3-2	MRPL30	0.0451111187413458	3.32372539688555	1.4463357499652	0.198463333118748	0.999660365730703	-5.20491869377067
A6NNL5	C15orf61	0.0316581102723713	3.32848108077479	0.302054663344742	0.772856083453195	0.999660365730703	-5.20498463170316
Q86VG3	C11orf74	-0.0526942653205207	3.29573290419163	-0.575695372329791	0.585849889532475	0.999660365730703	-5.20535778670129
Q9NRP2	CMC2	0.0603894210878951	3.31604248396466	1.12600088055233	0.303381511484986	0.999660365730703	-5.20543942962945
Q9UKA1	FBXL5	0.0272027356846162	3.18502497967736	0.186718514781942	0.858064518663659	0.999660365730703	-5.20612644546461
Q9BZ23	PANK2	0.053201772360577	3.28538469630321	0.589350819004852	0.577230643032736	0.999660365730703	-5.20621204834635
Q96P47-4	AGAP3	-0.0419528446570461	3.30463415813708	-0.538309757984019	0.609829740795065	0.999660365730703	-5.20689729278448
Q969Y2-2	GTPBP3	0.0781524377213285	3.32757161092348	0.888903379591786	0.408439315944691	0.999660365730703	-5.20704193686374
Q8NCJ5	SPRYD3	-0.00593078038852578	3.30914987137838	-0.0683888948554682	0.947708958599996	0.999660365730703	-5.20733390745408
Q5HYI8	RABL3	-0.0793779976819078	3.3470485164275	-1.35678901813272	0.223902947498302	0.999660365730703	-5.20738218802439
Q9Y4L5	RNF115; LOC101060478	0.0483419468422709	3.30790045925647	0.849450647862849	0.428372291336559	0.999660365730703	-5.20776775972747
Q01459	CTBS	-0.0428820199280927	3.20466366101395	-0.139601810564598	0.89356488232309	0.999660365730703	-5.2079801931166
P54619-3	PRKAG1	0.0634980670099525	3.2972067426168	1.51672383554307	0.180368274820364	0.999660365730703	-5.20829098724981
Q96BD0	SLCO4A1	0.110470771018972	3.0114813157268	0.710769946336329	0.504033305300028	0.999660365730703	-5.20834863143613
O95677-2	EYA4	-0.176892951250575	3.36041081317161	-0.860384830289883	0.422776986548205	0.999660365730703	-5.20908251719598
Q9Y6R9	CCDC61	-0.0238035282302919	3.32192014994938	-0.254954639473699	0.807313236840241	0.999660365730703	-5.20937814218083
Q9NQ11	ATP13A2	0.0385810325520377	3.301931864773	0.29942948117746	0.774762589901781	0.999660365730703	-5.20950108398839
O43822	C21orf2	-0.0636216347059359	3.32311153849201	-0.642226078574375	0.544582401670355	0.999660365730703	-5.20977002328529
Q12841	FSTL1	-0.0275861957892439	3.32750306955585	-0.240272664596658	0.818156312524045	0.999660365730703	-5.20992138112917
P17097-2	ZNF7	-0.135453577971256	3.30695377168902	-0.597664399779307	0.572020411023984	0.999660365730703	-5.21021528752453
Q8NDL9	AGBL5	0.0423597388477798	3.32581061393108	0.563718812917018	0.593471423137546	0.999660365730703	-5.21084016073567
Q9Y2U5	MAP3K2	-0.0576598115271655	3.32687271269354	-0.719745613732071	0.498875522773778	0.999660365730703	-5.2109342448331
Q96EU7	C1GALT1C1	0.040021042528025	3.28827645499688	0.615926543808761	0.560675402783302	0.999660365730703	-5.21106510429041
O95772-1	STARD3NL	0.0630788743916363	3.26216904695942	0.498980369669321	0.635642335910132	0.999660365730703	-5.21206004497825
Q9UJY1	HSPB8	-0.0701291029723743	3.35556372550249	-0.634701470315332	0.549156989870458	0.999660365730703	-5.21306679954384
P19404	NDUFV2	0.0438335285012625	3.33241310301545	1.74888420598971	0.131138816988254	0.999660365730703	-5.21323540436512
Q3ZCT1	ZNF260	-0.136540846785713	3.31176333250445	-1.18067182131658	0.282623834938533	0.999660365730703	-5.21351846174798
Q01094	E2F1	0.00730191208290817	3.32041140802448	0.0862702769960858	0.934072052320433	0.999660365730703	-5.21392808484076
O60825-1	PFKFB2	0.0451795664534224	3.32352391322211	0.72220063195246	0.497470977120486	0.999660365730703	-5.21413016829156
Q9GZN7	ROGDI	0.0620971896057753	3.31237494913876	1.21104779379988	0.27162464881133	0.999660365730703	-5.21432517394809
Q9NQ79	CRTAC1	-0.0471603270879711	3.33671573550042	-0.810092800870674	0.448962727586742	0.999660365730703	-5.21497648078135
Q9UBN1	CACNG4	0.0716696997927988	3.27009705743031	0.672788107605916	0.526250902900379	0.999660365730703	-5.21517717023043
O75078-1	ADAM11	0.0512637409212089	3.27900575369569	0.721476917450243	0.497884745402438	0.999660365730703	-5.21531324991143
P25963	NFKBIA	-0.0761551489273014	3.31835380618273	-0.98692421292428	0.361972628633809	0.999660365730703	-5.21557203138414
Q9NQE9	HINT3	-0.0505571656310777	3.30721641587239	-0.922518486893197	0.392014200364431	0.999660365730703	-5.21570765847947
O95297-1	MPZL1	0.0597072289625381	3.28598982768176	1.16104405240629	0.289932620996238	0.999660365730703	-5.21579756732112
Q9BXK1	KLF16	-0.0652196475666693	3.34403674591757	-1.04232849164989	0.337615977045969	0.999660365730703	-5.21581936460165
Q5VWQ8-1	DAB2IP	0.044971644317632	3.31100916273496	1.60675672445911	0.159477098130544	0.999660365730703	-5.21585792549169
O76024	WFS1	-0.0531025663488954	3.31642071093093	-0.64813471842113	0.541007112877425	0.999660365730703	-5.21589100991711
Q02083	NAAA	-0.0363962912799475	3.32517159857019	-0.458151397583115	0.663045849661606	0.999660365730703	-5.21590166231229
Q6ZSY5	PPP1R3F	-0.226013733441533	3.27456592921108	-0.415675215384347	0.69217434756346	0.999660365730703	-5.21630265889411
Q9H5X1-1	FAM96A	0.0475300673829431	3.28873902985366	0.853021578122477	0.426538971324163	0.999660365730703	-5.21640686072088
Q08431	MFGE8	-0.099297789509884	3.36728084397022	-1.03176410771921	0.342155264696617	0.999660365730703	-5.21693913284968
P31431-1	SDC4	0.0997850833912686	3.29375394159833	1.02925549774155	0.343240395231068	0.999660365730703	-5.21752452320509
Q9BTT4	MED10	0.0888157538132253	3.30274196851434	1.24506793666023	0.25974805510955	0.999660365730703	-5.21799512708942
Q9Y6Q3-2	ZFP37	-0.107285245237799	3.21118141817193	-0.591296261735295	0.576008869575879	0.999660365730703	-5.21821353640536
Q08999	RBL2	-0.0614476281595131	3.32582769878074	-0.868036675421046	0.418893699385927	0.999660365730703	-5.21861751403111
Q8TDR2	STK35	-0.0562925876778992	3.30882591213229	-1.06087574304257	0.329765286380784	0.999660365730703	-5.21915129371202
Q9BSY4-2	CHCHD5	0.0448605974343593	3.28865265407783	0.683209171468187	0.520092350361371	0.999660365730703	-5.21969818140164
Q92503-3	SEC14L1	-0.0352500950579517	3.31810327243751	-1.58490685984959	0.164325243168497	0.999660365730703	-5.22009834609326
Q9Y3M8-1	STARD13	-0.0585371056702324	3.3458927031369	-0.817921193576664	0.444811174171733	0.999660365730703	-5.22052289696816
Q08495-1	DMTN; EPB49	-0.0405214792620284	3.32081067215723	-0.466350891423141	0.657494497558464	0.999660365730703	-5.22105701641249
Q9HCJ1	ANKH	0.00659824353730875	3.2987902261782	0.0658527268463514	0.949644813805007	0.999660365730703	-5.22114271841915
Q9Y2Y6	TMEM98	-0.0151293564039469	3.29677927599702	-0.155243594669034	0.881744863182247	0.999660365730703	-5.22134231243676
Q86XS8	RNF130	0.0253286695011151	3.3126830607093	0.26605244916464	0.799148082479288	0.999660365730703	-5.22159260976921
O95379-4	TNFAIP8	0.0363596397071095	3.27690132691641	0.431811946930024	0.681036584204511	0.999660365730703	-5.22183934494249
P28472-1	GABRB3	-0.0673096634608742	3.30999512824577	-0.568039064011991	0.590715505347183	0.999660365730703	-5.22185573537844
Q86TJ2-1	TADA2B	-0.0471408841431171	3.32953047437652	-0.628400196751158	0.553006287854664	0.999660365730703	-5.22192348661056
O00189	AP4M1	-0.0410996305232036	3.31399588687926	-0.613331877007182	0.562278849929059	0.999660365730703	-5.22266377917507
Q96CB9	NSUN4	0.0856355449476358	3.31530035268609	1.44856883691375	0.197864267046611	0.999660365730703	-5.22326026990141
Q9UBU6	FAM8A1	-0.0971526995477691	3.30890925735997	-0.72688334196506	0.494799350985136	0.999660365730703	-5.22330737656528
Q9BSA4-1	TTYH2	-0.092768039884625	3.31691989244268	-0.817769016661505	0.444891611636696	0.999660365730703	-5.22348308979528
P36897-2	TGFBR1	-0.0340259338237663	3.31608425704549	-0.388243406581649	0.711302034198699	0.999660365730703	-5.22391297930648
Q86WT1	TTC30A	-0.00313103147188325	3.32060130745387	-0.0319991357576675	0.975515657926191	0.999660365730703	-5.22393085869604
Q6PJW8	CNST	-0.0742470023279442	3.29628218346399	-1.37342303174758	0.218963586383835	0.999660365730703	-5.22402910161549
Q9P0J7	KCMF1	-0.0547604268383931	3.34929490173574	-0.750294956500073	0.48158866346343	0.999660365730703	-5.22413502352661
Q6ZS30-2	NBEAL1	-0.0399939520710411	3.3183834793392	-0.532824345848454	0.613394425357098	0.999660365730703	-5.22437726690217
P09038-4	FGF2	-0.00279306315304406	3.25307594470496	-0.0238658879762128	0.981737249916373	0.999660365730703	-5.22439378524105
Q8NCR0-1	B3GALNT2	-0.00987577471328969	3.32716537537198	-0.123398624960426	0.905840804892265	0.999660365730703	-5.22597101586459
O95685	PPP1R3D	-0.0483286047936059	3.31915624065716	-1.00270190559151	0.354897489876839	0.999660365730703	-5.22652184435972
Q9UHR6	ZNHIT2	-0.048434647950939	3.33370132144218	-1.08148953763385	0.321216146641138	0.999660365730703	-5.22694220996443
Q08499-1	PDE4D	0.0411590907066018	3.3022389115819	0.729397279346872	0.493369089786127	0.999660365730703	-5.22807063838166
O43504	LAMTOR5	0.0811859839077999	3.26552433560616	1.13807900528953	0.298687816666822	0.999660365730703	-5.22815757944284
Q5MNZ9	WIPI1	0.0615511634395342	3.28347156188287	0.825653604442964	0.440737826208775	0.999660365730703	-5.22831683184849
Q16649	NFIL3	0.00256485982290786	3.31053337712389	0.0290165903672245	0.977796985464907	0.999660365730703	-5.22884687600072
Q9H9P5	UNKL	-0.0533666837252296	3.3103976259634	-0.836092335916697	0.435281902469045	0.999660365730703	-5.22886418157503
O15116	LSM1	-0.0402770076091067	3.32249196777781	-0.657188976541341	0.535557361333509	0.999660365730703	-5.22925373263007
P07093-3	SERPINE2	-0.0176460526383625	3.31807542148818	-0.208484242955225	0.841781541798838	0.999660365730703	-5.22929792320145
P13378	HOXD8	-0.0386353959332349	3.309274738289	-0.636624964651718	0.547985316634376	0.999660365730703	-5.22945615511042
Q68DU8	KCTD16	-0.0294697379195976	3.31543681957999	-0.3817892896553	0.715836757949298	0.999660365730703	-5.22954538772906
P02751	FN1	-0.293618088382574	3.41449597724575	-1.71214307656524	0.13795770262276	0.999660365730703	-5.22987931528614
Q9NX18	SDHAF2	0.0631880441352816	3.29049165306722	0.528602650640733	0.616145809669993	0.999660365730703	-5.22995989106506
Q9BQ90	KLHDC3	-0.0730017607110852	3.32805032690005	-1.34361473005182	0.227886204376925	0.999660365730703	-5.23033906623417
Q8NG08	HELB	0.0503016181367136	3.30141069544556	1.554425208016	0.1713231408004	0.999660365730703	-5.23034321456681
P18075	BMP7	-0.051793817782752	3.32745356022317	-0.663954601554603	0.531508098411058	0.999660365730703	-5.23097429627047
Q96MT3	PRICKLE1	0.0386767243506809	3.28337463475976	0.305364408520672	0.770454899472945	0.999660365730703	-5.23104988317362
Q99457	NAP1L3	-0.00970352109170851	3.31511204826263	-0.0994209788354999	0.924058268670057	0.999660365730703	-5.23106463795955
Q96HJ3-1	CCDC34	0.0236091345065697	3.29343823031392	0.299266692376164	0.774880870198245	0.999660365730703	-5.23114630929926
Q9BTY7	FAM203B; FAM203A; HGH1	-0.0439917924191716	3.32373585713777	-1.08442193286644	0.320014988192319	0.999660365730703	-5.23124187118574
Q9BST9	RTKN	0.0371214380721406	3.31201880103253	0.528975897052836	0.615902278875784	0.999660365730703	-5.2314234073814
Q9NQ87	HEYL	0.0341658394021022	3.30736001852878	0.425201332971427	0.685588862021799	0.999660365730703	-5.23165296784677
Q9HBE1-4	PATZ1	0.0446204869199922	3.33338857297097	0.291679918506417	0.780400624614159	0.999660365730703	-5.23217424856793
Q86TW2-1	ADCK1	-0.0247863050849062	3.34086500057511	-0.324698085768732	0.756485073627971	0.999660365730703	-5.23278727837439
Q8NB15-2	ZNF511	-0.0171260474675327	3.3016464648473	-0.183679611981476	0.860344245724535	0.999660365730703	-5.23320845650523
Q15532	SS18	0.0597184732259416	3.27086374927431	1.06506582964425	0.328012554053196	0.999660365730703	-5.23368341431719
Q3KRA6	C2orf76	-0.0198062126806556	3.34418490085666	-0.267209851320675	0.798298111226663	0.999660365730703	-5.23426544936964
P05937	CALB1	0.0281674822950085	3.2997205816556	0.396692265222725	0.705385340218329	0.999660365730703	-5.23450155589706
Q16849-1	PTPRN	0.0922197728967107	3.22679026905314	0.602304704050514	0.569124625117413	0.999660365730703	-5.2351310606277
O14681	EI24	-0.0362316528547153	3.34280374303186	-0.257413588001292	0.805501736958201	0.999660365730703	-5.23525043350634
P28356	HOXD9	-0.0404024855390888	3.32896205564544	-0.713107915669921	0.502686384784324	0.999660365730703	-5.23529158555482
Q8N137-2	CNTROB	-0.0500495883921626	3.31359796422328	-1.31671750128667	0.236217145015615	0.999660365730703	-5.23583023220363
Q96IW7	SEC22A	0.0637264339189001	3.29601345468988	1.00845898013456	0.35234352216203	0.999660365730703	-5.23583615027121
Q9NRR6-1	INPP5E	-0.0271080311119051	3.30803712353216	-0.32819888377382	0.753966093719262	0.999660365730703	-5.23612603678529
Q9H9S5	FKRP	0.012652415742159	3.28306387193848	0.117564303615525	0.910268225636153	0.999660365730703	-5.23628144225238
Q03936	ZNF92	-0.0965670164168915	3.30847116978416	-0.750158962585833	0.481664695507054	0.999660365730703	-5.23657775140798
Q9UN70-1	PCDHGC3	-0.0354254122584614	3.26631893390278	-0.482653678573333	0.646528085349027	0.999660365730703	-5.23697168996779
Q9BRU2	TCEAL7	0.0075440220668547	3.29977796190424	0.0771993590723317	0.940987073600956	0.999660365730703	-5.23763768359676
P52746	ZNF142	-0.0498454031383889	3.30300083573354	-1.07529514579181	0.323765723376677	0.999660365730703	-5.23768511001656
O75865-2	TRAPPC6A	-0.0615233490881585	3.2876487281904	-0.575836821404266	0.585760220173698	0.999660365730703	-5.23782104240202
Q6PI47	KCTD18	0.0300816328330505	3.30264309519872	0.362161390652026	0.729705153240794	0.999660365730703	-5.23891971320232
Q16585	SGCB	0.0232171460787967	3.28239648506425	0.1782991399167	0.864384183332738	0.999660365730703	-5.23934010776723
P49842-1	STK19	-0.0112724711791449	3.276537879125	-0.065738616377031	0.949731923219881	0.999660365730703	-5.23966916357078
Q9H4M7-1	PLEKHA4	0.00877608368240941	3.31269174985806	0.10321232462731	0.921174040232358	0.999660365730703	-5.23985453505155
P05452	CLEC3B	-0.198357871019487	3.35289825749954	-0.808147630086001	0.44999860164239	0.999660365730703	-5.24000927885209
Q9H175	CSRNP2	-0.0628589369048691	3.30907884862183	-0.801308612701793	0.453654238930644	0.999660365730703	-5.24015706552851
Q6UX15-2	LAYN	0.0355604737081386	3.29652671179255	0.338024910663197	0.746913645948034	0.999660365730703	-5.2408788303335
P41240	CSK	0.0338661721515613	3.31831094535741	1.84788407980362	0.11436853044907	0.999660365730703	-5.24124482955561
Q8TCT7	SPPL2B	-0.0209057539182719	3.33616015555602	-0.178151972080321	0.864494748442715	0.999660365730703	-5.24137331427402
Q8N961-1	ABTB2	-0.0102163848121887	3.26814784384289	-0.114291731693797	0.912753202789304	0.999660365730703	-5.24139049932903
Q8TAP8	PPP1R35	0.0113163119445888	3.31149225970037	0.139126973677561	0.893924188922446	0.999660365730703	-5.24224773915037
O95948	ONECUT2	-0.0162277639698327	3.33605813387044	-0.189485886466992	0.855989794264848	0.999660365730703	-5.24262131919515
O00308	WWP2	-0.0635526104277885	3.31147279056922	-1.18866058444042	0.2796945679772	0.999660365730703	-5.24363260548251
P58317	ZNF121	-0.10475722668711	3.33331251207384	-1.29460239392461	0.243269859306098	0.999660365730703	-5.24365221315573
Q6IAN0	DHRS7B	-0.0612916779698578	3.30930630125249	-0.615288499296868	0.561069439917022	0.999660365730703	-5.24390480285917
Q8N465	D2HGDH	0.0324857094053505	3.32911439260974	0.427857916708419	0.683757699696644	0.999660365730703	-5.2442772815869
P13804-1	ETFA	0.0718975416442533	3.34646404838467	1.76151203587651	0.128872092730473	0.999660365730703	-5.24432501839706
Q9UKU7	ACAD8	0.0506657441941928	3.33559764738486	1.53709826103001	0.175425745839292	0.999660365730703	-5.24488662328011
Q6BCY4	CYB5R2	-0.0427653709418751	3.33390618801614	-0.691263694653361	0.515364748139294	0.999660365730703	-5.24490637427132
P17010-3	ZFX	-0.0770213416898002	3.37286401650376	-0.421417871827152	0.688200818230274	0.999660365730703	-5.24531321658459
Q9NP64	ZCCHC17	0.0501770533800755	3.3151791796331	1.38135729201362	0.216642554440745	0.999660365730703	-5.24547533222273
Q86VP3-2	PACS2	0.0398501107400126	3.28424757026582	0.398468600392474	0.704144233466963	0.999660365730703	-5.24570245389014
Q5T6S3	PHF19	-0.0535851296091791	3.32243755248965	-0.55951800062362	0.59615829427981	0.999660365730703	-5.24573806924177
Q8WU17	RNF139	-0.106931389480073	3.31092980277628	-0.751308232400137	0.481022417550878	0.999660365730703	-5.24597663626952
Q14061	COX17	0.0949798231491059	3.10152633094943	1.12448423706632	0.303975260982796	0.999660365730703	-5.24616437565253
Q9NVF9-2	ETNK2	-0.0306992071585664	3.31604833710697	-0.348209958572965	0.739631794363916	0.999660365730703	-5.2461688913234
P17081	RHOQ	0.00194479259925489	3.29039241322889	0.0145738743669442	0.988846946618737	0.999660365730703	-5.24685738765652
Q9UL42	PNMA2	-0.0348810372258358	3.36080431686982	-0.317754437109661	0.761491034241588	0.999660365730703	-5.24693363090468
Q8N5Y8-1	PARP16	-0.0636108480988994	3.33462230010487	-0.492426534973236	0.640000307161457	0.999660365730703	-5.24694417058974
Q96A35	MRPL24	0.0476479752481392	3.33282185067851	1.55134000701287	0.172046950661234	0.999660365730703	-5.24699603840999
Q9UJ68-1	MSRA	-0.049461234747664	3.33769747546181	-1.20934325399517	0.272231927070648	0.999660365730703	-5.24714391151599
Q96S16-1	JMJD8	-0.033055307474433	3.33739886431035	-0.33749597643622	0.74729260237565	0.999660365730703	-5.24719652284907
Q9BS16	CENPK	0.0890466204165107	3.29275535650645	1.33482701741274	0.230578556198094	0.999660365730703	-5.24739648048016
O14977	AZIN1	-0.065908778925006	3.31802440166747	-0.73515281455151	0.490105157520073	0.999660365730703	-5.24751020869156
Q9Y3B6	EMC9	-0.0220832990926342	3.30118355868237	-0.282796072526201	0.786881934182628	0.999660365730703	-5.24755364632084
P51688	SGSH	-0.0494154782543366	3.32686689202423	-0.365477504226029	0.727354028881674	0.999660365730703	-5.24757316908309
P52799	EFNB2	0.0486708812329851	3.27250597605675	0.469053655052628	0.65566984410109	0.999660365730703	-5.24768007911391
P29590-11	PML	0.0222160891625828	3.33139576397542	0.24964189062582	0.811231587473645	0.999660365730703	-5.24776115066407
Q9Y2L6	FRMD4B	0.033820414976204	3.3208608431522	0.522536633641974	0.620111179942676	0.999660365730703	-5.24820462721091
P78382	SLC35A1	0.062037183305188	3.29878288270157	0.469512773735959	0.655360148406511	0.999660365730703	-5.24885508065534
Q6ZRY4	RBPMS2	-0.0386087532313142	3.33192335693693	-0.452555933771584	0.666847728143563	0.999660365730703	-5.24886347594292
Q6UWJ1	TMCO3	0.0341872996923534	3.3277537572835	0.299530241345535	0.77468938215276	0.999660365730703	-5.24937973039907
L0R6Q1	SLC35A4	0.0983295401806184	3.29144945066667	0.808578823672807	0.449768827432207	0.999660365730703	-5.24939777287043
A2RUB6-1	CCDC66	0.0220796241767927	3.31947641066498	0.229312201935621	0.826279969307543	0.999660365730703	-5.24976998136043
Q12959-4	DLG1	-0.0928549107208317	3.24751970296263	-0.244178197408133	0.81526753178791	0.999660365730703	-5.2499367958879
P24864-1	CCNE1	-0.0474711493684375	3.38204081869966	-0.358043789483032	0.732629022038973	0.999660365730703	-5.2502500846086
Q8IVL6-1	LEPREL2; P3H3	-0.0622361124404311	3.32797770978475	-0.963352227342507	0.372750701395263	0.999660365730703	-5.2503287802032
Q6XUX3-1	DSTYK	0.0439619469049877	3.31178230298072	0.800936910427445	0.453853530743266	0.999660365730703	-5.25112410065211
P29762	CRABP1	0.0434868564062092	3.31714997917244	1.84175329827767	0.115342551222828	0.999660365730703	-5.25175924615347
Q9BQG1	SYT3	-0.0363737867412807	3.316353552674	-0.579463392361428	0.583463975522525	0.999660365730703	-5.25185936734944
Q07002-3	CDK18	0.037575665056782	3.25748404299677	0.301566655969315	0.773210361749571	0.999660365730703	-5.25205626245312
P55055	NR1H2	0.0563782926211859	3.28848074638269	0.235494010862713	0.821695170684252	0.999660365730703	-5.25246670207378
Q9NVH6-8	TMLHE	-0.0542961154777374	3.32436096559014	-0.821990832023906	0.442663949799008	0.999660365730703	-5.25341777085155
Q9UBV8	PEF1	-0.0397298633748776	3.22439433501004	-0.231283526787437	0.824817090652628	0.999660365730703	-5.25352386509508
Q9UM19	HPCAL4	0.0556006895906088	3.25795867643791	0.222557914135641	0.831297951517195	0.999660365730703	-5.25455211362413
Q52LA3	LIN52	0.0987566683532796	3.28177912917154	1.12078458034461	0.305427733933232	0.999660365730703	-5.2546836897424
Q7L3V2	C22orf29; RTL10; GNB1L	0.0395063130901744	3.31987904049009	0.475734755227033	0.65117058019265	0.999660365730703	-5.25516007758327
Q96N21-2	ENTHD2; TEPSIN	-0.0379469706548684	3.30283825719096	-0.576888847298933	0.585093558863515	0.999660365730703	-5.25595690738435
P05155-3	SERPING1	-0.0136684551238281	3.32397920430359	-0.18599261012229	0.858608942951017	0.999660365730703	-5.25625973005281
Q9Y4G2	PLEKHM1	-0.0408820026559343	3.31667908311236	-0.970973321436946	0.369238725132341	0.999660365730703	-5.25678057192207
Q75V66	ANO5	-0.00757929628358267	3.31569288397587	-0.0930789749224146	0.928885694224928	0.999660365730703	-5.25718241587527
Q6AI39	GLTSCR1L; KIAA0240; BICRAL	-0.0509414008112946	3.31325921423323	-0.847361982950574	0.429447303652002	0.999660365730703	-5.25726431563353
A5PKW4	PSD	0.000851179085977775	3.344369553072	0.011011302813419	0.99157315185617	0.999660365730703	-5.25904759938572
P42566-1	EPS15	0.0740021505086	3.28758503977418	1.81108533825832	0.120339570399131	0.999660365730703	-5.25928464034439
P13051	UNG	-0.154067285049544	3.27739561551654	-0.412354536604317	0.69447695714404	0.999660365730703	-5.25936629505313
Q3KR37-4	GRAMD1B	-0.0364369282464485	3.29930693813667	-0.262625625688222	0.801666434475171	0.999660365730703	-5.25939176149092
Q9BXH1	BBC3	0.00921509892406694	3.31131000199228	0.125132513340974	0.904525737474911	0.999660365730703	-5.2599523393472
Q06730-2	ZNF33A	-0.0459272153233292	3.31102750326263	-0.546257477325053	0.604685707221591	0.999660365730703	-5.26054299365539
P51610-4	HCFC1	-0.0413275369357809	3.31164885966391	-0.83921545690837	0.433659193507078	0.999660365730703	-5.26061140719867
Q9H6P5	TASP1	-0.0513190021009614	3.32497076902037	-0.634040948136791	0.549559700143012	0.999660365730703	-5.26079551323496
Q02078-5	MEF2A	-0.0157113189714489	3.33786210394395	-0.166317645699566	0.873396500012355	0.999660365730703	-5.26095442453869
Q6UWU4-2	C6orf89	-0.125302914193745	3.32983704422869	-0.857624037139005	0.42418462179979	0.999660365730703	-5.26103101551399
Q8ND25-1	ZNRF1	0.0086112562691893	3.29676890423336	0.106502470273388	0.918672158860939	0.999660365730703	-5.2611771506726
Q9HBR0	SLC38A10	-0.00227350481073425	3.28956342156759	-0.0292538325741272	0.977615511856288	0.999660365730703	-5.26257786253324
Q96PQ6-1	ZNF317	-0.0444807006997856	3.31395936829058	-0.358827265365254	0.73207230212265	0.999660365730703	-5.26272988719945
Q15699	ALX1	-0.032079271167783	3.33798489901167	-0.34798596260646	0.739791626856475	0.999660365730703	-5.26306844639937
Q92820	GGH	0.0463973687897895	3.33439745509163	1.56841031710432	0.168078109147478	0.999660365730703	-5.26323502900471
Q8IUX1-1	TMEM126B	-0.0411719902213938	3.31486117069738	-1.08305891591172	0.320572839918413	0.999660365730703	-5.26375727669418
Q9Y3M2	CBY1	-0.0472359928568777	3.30150386916828	-0.607433523616197	0.565934329955529	0.999660365730703	-5.26394839748389
P27037	ACVR2A	0.057191707433301	3.33565812454033	0.507217071375965	0.630187968304167	0.999660365730703	-5.26397142565992
Q9Y2E4	DIP2C	0.0520635264102053	3.30026978508537	0.784987340991922	0.462463929699086	0.999660365730703	-5.26430838434804
Q9NTX7	RNF146	0.0438720515263729	3.31120779230738	1.0214613420222	0.346629612591403	0.999660365730703	-5.2644168206592
Q7Z7B1	PIGW	-0.0355235458627451	3.30146360232787	-0.209555555932727	0.840982227980435	0.999660365730703	-5.26442625784777
Q08117	AES	-0.0466157473484197	3.32656351534186	-0.705490395606872	0.507083758907478	0.999660365730703	-5.26445381944
Q8IV42-1	PSTK	0.0113018695162033	3.31942339442273	0.104664397320624	0.920069736122398	0.999660365730703	-5.26456208084203
Q9NRW1	RAB6B	0.0369979970637871	3.28297253403258	1.38233107879627	0.216359235962379	0.999660365730703	-5.26521870852432
Q6ZNA4-3	RNF111	-0.05142408652909	3.31341568025164	-0.685458217694414	0.518769424497766	0.999660365730703	-5.26552448222295
Q6P1S2-1	C3orf33	0.0460442576412104	3.28633642115679	0.318046005388458	0.761280573707902	0.999660365730703	-5.26573794820202
P50238	CRIP1	0.0370210795067532	3.33998788499396	0.579440131834504	0.583478686489243	0.999660365730703	-5.26628266110407
Q96C03-3	SMCR7; MIEF2	-0.0239089307269545	3.30433523812845	-0.289045262940503	0.782320776885349	0.999660365730703	-5.26666893103372
A6H8Y1	BDP1	-0.057454016525571	3.32254831848176	-1.33503817483615	0.230513528518875	0.999660365730703	-5.26676686838045
Q9H1V8	SLC6A17	0.0290835100995804	3.30339733283551	0.295823287212167	0.7773843531126	0.999660365730703	-5.2669358443805
Q5XG87	PAPD7	-0.00261619000203401	3.3231086214077	-0.0301702596993192	0.976914523451453	0.999660365730703	-5.2669620091956
Q2M3G4-1	SHROOM1	-0.0388103381765043	3.30799491405572	-0.681460434249134	0.521122508794571	0.999660365730703	-5.268018916359
Q53H96	PYCRL; PYCR3	-0.065048618826112	3.32974108919439	-0.268854973798666	0.797090490743282	0.999660365730703	-5.26828895699964
Q7Z6M2	FBXO33	-0.0443506352728578	3.31890251983526	-0.734349360942319	0.490559906399226	0.999660365730703	-5.26836385400734
P04198	MYCN	-0.0513362441146793	3.32089289574709	-1.55397091475732	0.171429540207903	0.999660365730703	-5.26891587902133
P42229	STAT5A	-0.02739088916779	3.33121655154381	-0.224965723440278	0.829508095495051	0.999660365730703	-5.26907479492004
Q9BVM4	GGACT	-0.0109085344119161	3.31344846976941	-0.150840532972799	0.885068892295989	0.999660365730703	-5.26910434382686
Q6N063-1	OGFOD2	-0.0192326975355719	3.29164236597022	-0.0923421311694549	0.929446786918747	0.999660365730703	-5.26910638314066
Q6DCA0	AMMECR1L	0.027912370872356	3.31972769885941	0.390613181316508	0.709640242246364	0.999660365730703	-5.26947148453531
Q05682-1	CALD1	0.0460685552009355	3.31683978473689	0.570399941823864	0.589212644314137	0.999660365730703	-5.2697790105805
Q8NFU5	IPMK	-0.0491687072799881	3.33125494128646	-0.674718947735555	0.52510627316611	0.999660365730703	-5.27034419483091
Q96MP5	ZSWIM3	-0.0356838716488299	3.29509406042158	-0.477777840065958	0.649797901278795	0.999660365730703	-5.27042052280915
Q2PZI1-1	DPY19L1	-0.0985466416746452	3.31953563568624	-0.614553233053801	0.561523728934772	0.999660365730703	-5.27069681882011
Q16594	TAF9	0.0421876090960793	3.28569862586518	0.575716871025449	0.585836260260659	0.999660365730703	-5.27126160317758
Q96CW1	AP2M1	0.103265970950893	3.2795923398491	1.69910344082928	0.140459788138068	0.999660365730703	-5.27155197906184
Q8N4S0	CCDC82	-0.0437441525694152	3.32969577112727	-1.37649904254313	0.21806108407913	0.999660365730703	-5.2716287276157
O75369-8	FLNB	-0.0473667422151358	3.31182323692102	-0.659640433884787	0.534087876790614	0.999660365730703	-5.27167403669099
Q17RN3-1	FAM98C	-0.0397310202241609	3.3240483963524	-0.62370378534048	0.555886097337221	0.999660365730703	-5.27191078528839
P15289-1	ARSA	-0.039769137218729	3.30836467483905	-0.812294687148737	0.447792213343272	0.999660365730703	-5.27230059193743
Q9Y3A0-1	COQ4	0.0366668821995014	3.30193710714035	0.571093148452163	0.588771795647696	0.999660365730703	-5.27245100098661
Q9H7P6	FAM125B; MVB12B	-0.0478013276692969	3.33315813163958	-1.11134504053748	0.30916006352019	0.999660365730703	-5.27255603192298
Q9BRS8	LARP6	-0.0551893278409656	3.33505658686562	-1.14526974370794	0.295922641648998	0.999660365730703	-5.27277538209953
P33897	ABCD1	-0.0316587941956718	3.29627292334595	-0.26761533981125	0.79800040086338	0.999660365730703	-5.27293744090368
Q96N03-1	VSTM2L	0.0299183730353085	3.32676848058723	0.309197907694898	0.767677224236143	0.999660365730703	-5.27305872490837
O95450	ADAMTS2	-0.0186578038830505	3.32795762525628	-0.251566308661363	0.80981155712164	0.999660365730703	-5.27355433069145
Q16799-3	RTN1	0.0388783273643799	3.31613220371523	0.290112794538416	0.781542549925748	0.999660365730703	-5.27379323897271
P48454-3	PPP3CC	-0.0312445263814765	3.34568015576331	-0.44391883586667	0.672737597108421	0.999660365730703	-5.2742502609201
Q9Y5J7	TIMM9	0.125928979486985	3.17812870740314	1.2600433375227	0.254665617361934	0.999660365730703	-5.27437368326351
Q4FZB7-1	SUV420H1; KMT5B	-0.0569851927229617	3.32252738228078	-0.715034637346635	0.501578201087633	0.999660365730703	-5.27493936764097
Q6ZRI8	ARHGAP36	0.022358943213058	3.33298080699449	0.301106520353335	0.773544460933562	0.999660365730703	-5.27568355789223
Q6PCD5	RFWD3	-0.0407965026489133	3.33545199641165	-1.33448203643068	0.230684831414212	0.999660365730703	-5.27571054276899
Q9NYI0-1	PSD3	-0.0443028526002936	3.30921915134313	-0.981867933627082	0.364263558106265	0.999660365730703	-5.27744843615299
Q9UKI2	CDC42EP3	0.0404430663279314	3.3020090590216	0.588686167293304	0.577648410975897	0.999660365730703	-5.27754308621059
Q68DH5	LMBRD2	0.0431240492600214	3.32694949441832	0.862884930478849	0.421505262738843	0.999660365730703	-5.2785178146155
Q8WX77	IGFBPL1	-0.0425393691066809	3.29157903160849	-1.06779507810309	0.326875015955038	0.999660365730703	-5.27901442121692
Q8WUB2	FAM216A	0.0463342002221897	3.3311742626314	0.833480133659947	0.436642554341697	0.999660365730703	-5.27926413235263
Q6PIJ6-1	FBXO38	-0.0414946245197796	3.32956373755077	-1.36094865174845	0.222658403430388	0.999660365730703	-5.279649653041
Q71RG4-1	TMUB2	0.0539919860650529	3.26306022334163	0.607567572368725	0.565851093309145	0.999660365730703	-5.28029285380114
Q96EX2-1	RNFT2	-0.0523624833251002	3.32770424193424	-0.386344491496962	0.712634895898955	0.999660365730703	-5.28033757596411
Q8IZC4-1	RTKN2	-0.0488783946210466	3.32606722591591	-0.865231176475889	0.420314387268121	0.999660365730703	-5.28122791102197
P15923-2	TCF3	0.0457515514776455	3.3103951312541	0.57731194043585	0.584825573846305	0.999660365730703	-5.28127434247675
Q96S97	MYADM	0.0343216790876581	3.30062880338502	0.203066480060399	0.845826920139784	0.999660365730703	-5.28147421489451
Q9UPQ0-1	LIMCH1	-0.0041682446311556	3.32693032659608	-0.0549351317636041	0.957982331706965	0.999660365730703	-5.28163477803091
Q9BV29-2	C15orf57; CCDC32	0.047697219934192	3.27480211744847	0.556145183016787	0.598320652324814	0.999660365730703	-5.28165573663659
Q9HB20	PLEKHA3	-0.0197890487302933	3.30749825650154	-0.227044856711878	0.82796346464574	0.999660365730703	-5.28185328555557
Q15560	TCEA2	-0.0431963871752085	3.3396943831493	-0.307023081872542	0.76925259718766	0.999660365730703	-5.28241327038667
Q96L58	B3GALT6	0.0570221741754932	3.30159271751708	0.772657261750168	0.469199067792566	0.999660365730703	-5.28244056316916
Q8N6N7	ACBD7	0.0835324894527281	3.20258191165475	1.06235776705899	0.329144472959244	0.999660365730703	-5.28272889602613
P59190-1	RAB15	-0.0281621521143765	3.32187830773709	-0.313889787227683	0.764282733520664	0.999660365730703	-5.28296111048235
P30044-1	PRDX5	0.0348884282430816	3.32984056809918	1.66866848731858	0.14647209703914	0.999660365730703	-5.28308178025175
O95755-1	RAB36	-0.0623758378942806	3.31857429866599	-0.535740948225691	0.611497624418803	0.999660365730703	-5.28332963297324
Q9UBF6	RNF7	0.0478333654298398	3.32185003959056	0.646776836701029	0.541827443499951	0.999660365730703	-5.28364180109518
Q8NG27	PJA1	-0.0345353215213543	3.36942647509906	-0.305708069865414	0.770205736253559	0.999660365730703	-5.28438755794667
P36873-2	PPP1CC	-0.0455803094701192	3.33512205559645	-1.16852535593598	0.287127993598526	0.999660365730703	-5.28439860380404
Q8TB40	ABHD4	-0.0469213738761945	3.29591013367279	-0.475555157689052	0.651291317507373	0.999660365730703	-5.28448907572541
P0CG29	GSTT2	0.0252433208966125	3.33949506510287	0.192277031173254	0.853898525558445	0.999660365730703	-5.28480208596458
Q9Y233-2	PDE10A	-0.0052316906294462	3.32945577563513	-0.0694902017581615	0.94686845295521	0.999660365730703	-5.28554218434198
Q96JK9	MAML3	-0.0552318050571204	3.32057998032769	-0.894377256703704	0.405729656515428	0.999660365730703	-5.2859137625952
Q9HAT8	PELI2	-0.0626585638050585	3.34417955359107	-1.03727606697229	0.339780756834325	0.999660365730703	-5.28603251634387
Q8N653	LZTR1	0.0447498006864896	3.27905282388955	1.11661367080691	0.307072199948265	0.999660365730703	-5.28621034721858
Q16540	MRPL23	-0.0226689636916372	3.34681694904531	-0.218121249679604	0.834598867493562	0.999660365730703	-5.28647812686934
Q6ZTN6-3	ANKRD13D	-0.0239359004588272	3.34854689870097	-0.334708943079624	0.749290658133225	0.999660365730703	-5.28649045794423
O43581-3	SYT7	0.023207930720607	3.33935094589141	0.129747261613335	0.90102731303982	0.999660365730703	-5.28654160785298
Q9Y3A3-3	MOB4	-0.0486552141189825	3.32087171145195	-1.51554218218683	0.180658901844247	0.999660365730703	-5.28688067321257
P34947	GRK5	0.0649316385932151	3.29543612164133	1.44001242451994	0.200168778833237	0.999660365730703	-5.28697614448518
Q9H6K5	FLJ22184; PRR36	-0.0607277284431099	3.29104991902881	-1.11846288683479	0.306342194986282	0.999660365730703	-5.28743788884778
Q5U5Q3	MEX3C	0.0315623982456325	3.27251627084912	0.311778636719239	0.76580940751687	0.999660365730703	-5.28919223084628
P0DJ07	PET100	0.102212467413821	3.20606152004452	0.521546781515045	0.620759585446208	0.999660365730703	-5.28933336641765
Q8WV37-1	ZNF480	-0.0279076447382178	3.32389938100115	-0.333041849572527	0.750486838789501	0.999660365730703	-5.28951330321833
Q96LX8	ZNF597	-0.0526466685201334	3.33469438383993	-0.88420173018734	0.41077758944511	0.999660365730703	-5.28952989593526
O43491-1	EPB41L2	-0.00415152497701068	3.3437292319245	-0.0432933306400435	0.966879311737933	0.999660365730703	-5.29021848275942
Q02487	DSC2	0.0140405148956145	3.30309605249411	0.168094341415232	0.872058739394653	0.999660365730703	-5.29041958971168
Q96MX3	ZNF48	-0.113660998055008	3.34241894221838	-1.04348524624663	0.337121930706636	0.999660365730703	-5.29046176632216
P30793-1	GCH1	-0.0506907702716607	3.29987112040265	-0.775772766424432	0.467490795450953	0.999660365730703	-5.29050959708054
P30038	ALDH4A1	0.0647700823843551	3.3335784847288	1.62914783105267	0.154650712650534	0.999660365730703	-5.2907926331766
Q8WVD5-1	RNF141	0.0122402576336362	3.29744249594135	0.0950658427807551	0.927372956187462	0.999660365730703	-5.29089940309603
A2AJT9-1	CXorf23; BCLAF3	-0.0382014300849513	3.31427305423133	-0.754226393687627	0.479394238633519	0.999660365730703	-5.29134128538923
Q9BQA9-1	C17orf62	-0.033771246544988	3.28488467045023	-0.287538365312548	0.783419770677903	0.999660365730703	-5.29194261748999
P19438-1	TNFRSF1A	-0.000810235867691383	3.29481726696271	-0.00893684357413681	0.99316066124507	0.999660365730703	-5.29207059155174
Q12891	HYAL2	0.00713826639927977	3.1676743937488	0.0364788081296256	0.972089673657429	0.999660365730703	-5.29237286701829
Q0ZGT2	NEXN	-0.108466034491118	3.37860875838441	-0.654559957256787	0.537136149102081	0.999660365730703	-5.29297265941583
Q6PIL6-5	KCNIP4	0.0535044008745349	3.19957539312173	0.661257146619324	0.533120179264209	0.999660365730703	-5.29298994168493
Q8WUJ0	STYX	-0.031116026260115	3.32883847177333	-0.344362364551087	0.742379223499859	0.999660365730703	-5.2930458045288
Q8WW01	TSEN15	-0.0405389834144248	3.33488158955785	-0.588079937487484	0.578029615054581	0.999660365730703	-5.29337753503804
Q6PJP8	DCLRE1A	-0.0479128134191484	3.32583004887053	-1.18674486571583	0.280394623455904	0.999660365730703	-5.29352597254827
Q96MM7-4	HS6ST2	0.0384727049275685	3.31048043363083	0.525962705160151	0.617869814539147	0.999660365730703	-5.2937802985133
Q6UXG2-1	KIAA1324	0.00758012876392988	3.31643831004457	0.103114468422271	0.921248467034434	0.999660365730703	-5.29378777046808
P35568	IRS1	-0.0351032407379078	3.31666955988033	-0.56941275093115	0.589840787094014	0.999660365730703	-5.29383171091591
Q96J42-1	TXNDC15	-0.0792833294087279	3.32528307016188	-0.810585976426813	0.448700366300144	0.999660365730703	-5.29414386403498
Q8N8R3-1	SLC25A29	-0.0406794081235837	3.32403274532287	-0.351751714244965	0.737106472724773	0.999660365730703	-5.29414755782798
Q7Z5L9-2	IRF2BP2	-0.0861316645881917	3.27121075158889	-0.281517278721378	0.787816451505455	0.999660365730703	-5.29452851272671
Q6NTE8	C5orf45; MRNIP	0.0523857671207642	3.29770075128455	0.726385823150005	0.495082738404166	0.999660365730703	-5.29491027473028
Q9BUB7	TMEM70	0.105627041594341	3.32640103179505	1.13370476785988	0.300380571861427	0.999660365730703	-5.29576748965372
Q8TCP9	FAM200A	0.0432789873375266	3.31089838802967	0.99672256139509	0.357565702543396	0.999660365730703	-5.29583137333418
Q8WXI4	ACOT11	0.0428691286484463	3.32537870155855	0.809619347414099	0.449214700792507	0.999660365730703	-5.29587146546447
Q6ZW49	PAXIP1	-0.0419811249636046	3.31830794383318	-1.52314985747949	0.178795463686142	0.999660365730703	-5.29630865303676
P53370	NUDT6	0.0215564680617106	3.34035103539917	0.28153425832516	0.787804040602214	0.999660365730703	-5.29638312943995
P29597	TYK2	0.0396873777880296	3.32339698281221	1.36809936398477	0.220533565098638	0.999660365730703	-5.29646927128588
Q2YD98-1	UVSSA	-0.0194097440603103	3.30532608741085	-0.262826268522974	0.801518910829297	0.999660365730703	-5.29664791692373
P27544	CERS1	-0.055168277525234	3.31335251983769	-0.33055267126815	0.752274301871709	0.999660365730703	-5.2968411137351
P60468	SEC61B	-0.092231605240772	3.31385671237732	-1.12845981130444	0.302420939590045	0.999660365730703	-5.29697028260017
Q969P6	TOP1MT	0.0311295222247565	3.31555716197329	0.499621021356554	0.635217187931842	0.999660365730703	-5.29738960448622
Q8IW19	APLF	-0.0572633210050663	3.29807595730677	-0.637813094628867	0.54726236472404	0.999660365730703	-5.29772353829929
Q5T4F4-3	ZFYVE27	-0.0293943222516994	3.31954903551195	-0.231044535668189	0.824994399949078	0.999660365730703	-5.29821349209235
P28715-1	ERCC5	0.0338474637515396	3.32023986138826	1.67402238598984	0.145396711648073	0.999660365730703	-5.29854680163614
O94925-3	GLS	0.0954113213322672	3.30621004119397	1.2663631999404	0.252547108263862	0.999660365730703	-5.29860716801978
Q53SF7-1	COBLL1	-0.00743893558263466	3.3171024451375	-0.0978057494743343	0.925287426049464	0.999660365730703	-5.29879911724728
Q13428-7	TCOF1	-0.0322909554117454	3.34525080531542	-0.545203764012352	0.6053662862678	0.999660365730703	-5.29882977881157
Q9NTG7	SIRT3	-0.0101777672485271	3.33074719048933	-0.113324858255836	0.913487591880625	0.999660365730703	-5.29897964617017
Q96HV5	TMEM41A	-0.0791232894630491	3.29880751176643	-0.369590316249405	0.724442565375186	0.999660365730703	-5.29905163667288
Q6P1A2	LPCAT3	-0.0597130580960296	3.30355522047358	-0.662404413193903	0.532434155038231	0.999660365730703	-5.29951610285253
Q6V1X1	DPP8	0.0545155538371344	3.29780258854852	1.19948990999603	0.275765457386465	0.999660365730703	-5.30019929056532
Q92539	LPIN2	-0.0463241933131438	3.32324545864826	-0.585265347777355	0.579801424249043	0.999660365730703	-5.30030479372956
Q93062-3	RBPMS	-0.017160990726996	3.30154757759865	-0.231817061330856	0.824421298323146	0.999660365730703	-5.30050671847027
Q96F45	ZNF503	-0.0544329718448152	3.33962239959905	-1.41992457363645	0.205676617423996	0.999660365730703	-5.30057673772159
Q92832	NELL1	0.00625127252461851	3.321375393602	0.0785355896607804	0.939968055992167	0.999660365730703	-5.30064584769995
P61457	PCBD1	0.0777053766401614	3.30088293078646	1.08449176062734	0.319986430928561	0.999660365730703	-5.30089791906358
Q96GC6-1	ZNF274	-0.0340678720865296	3.31544170044257	-0.509220995383981	0.628864802507967	0.999660365730703	-5.30096557294737
P49069	CAMLG	-0.0669941984991987	3.28788660825886	-1.0688215039965	0.326448046306782	0.999660365730703	-5.30123944566671
O15121	DEGS1	-0.116402543104439	3.31973031914315	-0.638760391565632	0.546686383463776	0.999660365730703	-5.3019292786407
Q9Y664	KPTN	0.0458387721188938	3.30060944709968	1.01976516135916	0.347370745831533	0.999660365730703	-5.30247875519062
Q6N075-2	MFSD5	-0.00147980040280907	3.3132214622082	-0.0116515008262175	0.991083239413878	0.999660365730703	-5.30264863363975
Q9H0C5	BTBD1	-0.0477134587948493	3.3353588616881	-1.05742925865705	0.331212715076158	0.999660365730703	-5.3029081262795
Q8IZL2	MAML2	-0.0318322489771432	3.30596941359977	-0.423283123789548	0.686912527365152	0.999660365730703	-5.30293481447086
O43313	ATMIN	-0.0291740025479751	3.31087621628969	-0.374347487501321	0.721081257168373	0.999660365730703	-5.30316580182803
Q9H0F6-1	SHARPIN	0.0127575945809301	3.29691274958506	0.174572397288312	0.867185062690519	0.999660365730703	-5.30359900520358
Q96LW7-1	C9orf89; CARD19	-0.0280886969657827	3.26112860795338	-0.125589977439619	0.904178829090654	0.999660365730703	-5.30375477914524
Q2VPK5-1	CTU2	0.0480664807342739	3.30439724434251	1.35289273112111	0.225074398446358	0.999660365730703	-5.30387164401501
Q96E22	NUS1	-0.0571004272330284	3.32678562921065	-0.836634708275918	0.434999778815602	0.999660365730703	-5.30456876680523
P46734-3	MAP2K3	0.0425703829192692	3.31339952917844	1.36958066993121	0.220095697950552	0.999660365730703	-5.30457053310784
Q96CX3-1	ZNF501	-0.136044697016381	3.26192475081043	-0.570361413711268	0.589237152148454	0.999660365730703	-5.30457057059376
Q96EY8	MMAB	0.0509780251572345	3.32426271127385	1.02602460905225	0.344642055129963	0.999660365730703	-5.30483997384046
Q6UB35-1	MTHFD1L	0.0613761898941752	3.32327157589158	2.01957800178696	0.0901890751387614	0.999660365730703	-5.30539569777394
O60242	BAI3; ADGRB3	-0.0635347890661376	3.3145826858186	-0.349469704622335	0.738733167521084	0.999660365730703	-5.30633162853268
O14594	NCAN	-0.0203158070806968	3.34094471717217	-0.292347642027337	0.779914252974541	0.999660365730703	-5.30637351344575
Q04756	HGFAC	-0.12516491362912	3.34418196861186	-0.889729948100375	0.408029277452482	0.999660365730703	-5.3064827147916
Q13586	STIM1	-0.0491686077618764	3.30419395314374	-0.416570921643926	0.691553867301794	0.999660365730703	-5.30684761516886
Q9NTK5-2	OLA1	0.0428627985046805	3.31826112837753	1.70664238454324	0.139007867475799	0.999660365730703	-5.30692030598838
Q9UGI0	ZRANB1	-0.0211865954982098	3.2909884820506	-0.265476288978621	0.799571314806589	0.999660365730703	-5.30698961132309
Q8NAT1	GTDC2; POMGNT2	-0.0351913818198302	3.33249541508466	-0.407363930600643	0.697944249787726	0.999660365730703	-5.30727383387307
Q53HC9	TSSC1; EIPR1	-0.051394847730018	3.32793885059394	-1.37387645036171	0.218830340505345	0.999660365730703	-5.30844456496587
P49815	TSC2	0.0361589339094696	3.30980805429412	1.88571721620848	0.108536089271178	0.999660365730703	-5.30848106175667
A2RUS2	DENND3	-0.125872146477802	3.41197892231973	-0.559086224402808	0.596434859654525	0.999660365730703	-5.3085038280516
Q9NR82-6	KCNQ5	0.00315785459714085	3.33921512640289	0.0260472133609875	0.980068469593468	0.999660365730703	-5.30867729069819
Q9NVD7	PARVA	0.1060611111776	3.30380069406158	1.212225059447	0.271205908480541	0.999660365730703	-5.30877926465601
Q9NWR8	CCDC109B; MCUB	0.0601752415791033	3.33467452516829	0.564457462119852	0.592999704896365	0.999660365730703	-5.30925083170867
Q5VV52-3	ZNF691	-0.0747395642734187	3.33038504339512	-1.0318673652035	0.342110658954634	0.999660365730703	-5.3093659475208
P51523	ZNF84; LOC100996464	-0.00976774127987746	3.33808335650942	-0.0867277813239407	0.933723445202791	0.999660365730703	-5.30943587211981
Q86UY8	NT5DC3	0.0693094978065236	3.33979187454317	1.4083043891825	0.208925949847837	0.999660365730703	-5.30951010476778
Q14849-1	STARD3	0.047406544536121	3.28518774931191	0.517384455771313	0.623490215559622	0.999660365730703	-5.30959074823536
Q5TEU4	NDUFAF5	0.0493201676148774	3.34459096623265	0.862807324589797	0.421544695679572	0.999660365730703	-5.30967150756397
Q5FWF4-1	ZRANB3	-0.0392056024922462	3.31974650093432	-0.7077464716532	0.505778725572396	0.999660365730703	-5.30970966680358
Q9C0I3	CCSER1; FAM190A	-0.0359072971008327	3.31903468109217	-0.716657443828539	0.50064609169897	0.999660365730703	-5.31017885904405
O43181	NDUFS4	0.0454971115039358	3.35050112349605	1.16792221639424	0.287353240349964	0.999660365730703	-5.31051633808434
P51693-2	APLP1	0.0350281843730817	3.2893474386594	0.647196906287198	0.541573584815917	0.999660365730703	-5.31057737238978
Q9HCE9	ANO8	-0.00870524034952773	3.31338476160202	-0.0883107191501505	0.93251741023303	0.999660365730703	-5.31059046685756
O00541-1	PES1	-0.0838688429705076	3.31242001207923	-0.39764737464494	0.704717891369037	0.999660365730703	-5.31075422080059
Q9Y2G1	C11orf9; MYRF	0.0460895684334712	3.30588564186986	0.849047046527517	0.428579865692771	0.999660365730703	-5.31097126585854
Q96S59-1	RANBP9	-0.0483832793085483	3.33486349322013	-1.44496615945878	0.198831579151712	0.999660365730703	-5.31129811638171
Q8N336	ELMOD1	-0.0758692223967982	3.12666248285044	-0.4133267164397	0.693802460949704	0.999660365730703	-5.31134680780875
Q96HB5-4	CCDC120	-0.0145099047834378	3.32026021077368	-0.202946888628446	0.845916276347288	0.999660365730703	-5.31148738836981
O95476	CTDNEP1	-0.0447800665115157	3.34054605272705	-0.525577335327678	0.618121702400525	0.999660365730703	-5.31176479557488
P19440	GGT1	-0.0163645981207364	3.30575315057863	-0.158749751025654	0.879099825377178	0.999660365730703	-5.31230622447018
Q9NQX5	NPDC1	0.0194547692708551	3.29149692952211	0.212977287235729	0.838430648851897	0.999660365730703	-5.31244227766424
Q8WVN8-1	UBE2Q2	0.0226442758469869	3.33114616323719	0.318649903504917	0.760844737759708	0.999660365730703	-5.31333259734594
O14595	CTDSP2	-0.0218463100012177	3.29835834740918	-0.192461059938002	0.853760687324937	0.999660365730703	-5.31425470046797
Q96FE5	LINGO1	-0.00855832224961843	3.29834372064478	-0.105573835920969	0.919378205725888	0.999660365730703	-5.31436304379404
Q9Y2G9	SBNO2	-0.0522756120563302	3.30815438498273	-1.17881075266449	0.283310007250497	0.999660365730703	-5.31449329332367
Q5VUJ9-2	EFCAB2	0.0128874337438059	3.26753249188264	0.0992951073878612	0.924154046117712	0.999660365730703	-5.31496219201392
P82933	MRPS9	0.0570909479880427	3.34591049160882	1.56147591745183	0.169679789049268	0.999660365730703	-5.31504355941318
Q9NPB6-1	PARD6A	-0.0303262894855925	3.31451855821628	-0.368229782126561	0.725405132346315	0.999660365730703	-5.31509909766658
O75629	CREG1	-0.0638594379484175	3.34848597595718	-0.852062186587045	0.427030954117974	0.999660365730703	-5.31600611595543
A8MT69-1	STRA13; CENPX	0.0294366857056066	3.29158404486027	0.297049591720747	0.776492446222807	0.999660365730703	-5.31600985822825
Q96DZ5	CLIP3	0.0413084102265101	3.26256772897438	0.494409962062018	0.63867975331069	0.999660365730703	-5.31644863074998
Q6Y2X3	DNAJC14	0.0191394197956565	3.26170603121552	0.195601738234911	0.851409184989601	0.999660365730703	-5.31650767693567
Q9Y251	HPSE	0.058447091717261	3.31769154362086	0.697351440165904	0.511810363451927	0.999660365730703	-5.31683445844489
Q9UL33-1	TRAPPC2L	-0.0536630921940123	3.32283061971429	-1.07464169703415	0.324035650106001	0.999660365730703	-5.31789938815544
Q9Y4E5-4	ZNF451	-0.0445920639383212	3.36061110994552	-0.637148735154113	0.547666539641193	0.999660365730703	-5.31797175421379
Q8N6G5-1	CSGALNACT2	-0.0273944059785198	3.31568231973549	-0.248811630275929	0.811844481359073	0.999660365730703	-5.31800523793338
O60911	CTSL2; CTSV	-0.00921574734429949	3.33979377222336	-0.13138425258124	0.899786897337238	0.999660365730703	-5.31816797960788
Q7L8A9-1	VASH1	-0.0119493507888604	3.31370562926193	-0.130184989004429	0.900695598704556	0.999660365730703	-5.31862588407179
Q75VX8	FAM59B; GAREML; GAREM2	-0.0366426889916031	3.31415294601206	-0.785164283187944	0.462367776549204	0.999660365730703	-5.32017091907517
Q9UJV8	PURG	0.0155191607910676	3.30743443078258	0.225621434960833	0.829020863268654	0.999660365730703	-5.32023739162935
P78537	BLOC1S1	0.0428655537984858	3.30978813160347	0.843047329964733	0.431674291231252	0.999660365730703	-5.32041223822879
Q96DN5-1	WDR67; TBC1D31	0.00521641672915639	3.34216471694477	0.0717101722685328	0.945174424496289	0.999660365730703	-5.32047862019102
Q96LD8	SENP8	-0.00722362668636452	3.31944714206279	-0.0515593657273933	0.960561562377056	0.999660365730703	-5.32058652970446
Q96RQ3	MCCC1	0.062919800988955	3.32882251420892	1.67854452920746	0.144494339348521	0.999660365730703	-5.3208280455169
Q96GC9	VMP1	-0.14466553567582	3.33775327300001	-0.837228801626786	0.434690905146301	0.999660365730703	-5.32102229952234
O94925-1	GLS	0.0140978041390976	3.38920218518358	0.107187714230474	0.918151215463179	0.999660365730703	-5.32126439176442
O75129	ASTN2	-0.0558805623296923	3.3345790372617	-1.20450745542029	0.2739611822065	0.999660365730703	-5.32134042043671
Q6PII5-2	HAGHL	0.0318703307006058	3.28995017650222	0.551812329296621	0.601105113872117	0.999660365730703	-5.32169241356923
Q9UQ53-3	MGAT4B	-0.0429055315165423	3.30833906825923	-0.636396976417818	0.548124111052186	0.999660365730703	-5.32217205644525
Q8NC60	NOA1	0.0759025340042699	3.33681945176321	1.58885212081341	0.163439591226865	0.999660365730703	-5.32242792950985
O60266	ADCY3	0.0361783051527131	3.28153731274897	0.223086762067663	0.830904734403549	0.999660365730703	-5.3224655501678
P53396-2	ACLY	0.0545596152363303	3.30371483038275	0.924195073774189	0.391208411407962	0.999660365730703	-5.32260976027221
Q9Y4D7-1	PLXND1	0.00761270261204492	3.26509592104635	0.0840270185626297	0.935781591043098	0.999660365730703	-5.322870020167
Q6EMB2	TTLL5	-0.0288988553462285	3.33833087111899	-0.424638031459804	0.685977443086173	0.999660365730703	-5.32293638254551
Q9Y4X0	AMMECR1	-0.0425846330377144	3.30164542557905	-0.771109340907755	0.470049438448061	0.999660365730703	-5.3231572550207
Q9H6A9-1	PCNXL3; PCNX3	0.0136394872636219	3.29414140949776	0.10947430765905	0.916413201446147	0.999660365730703	-5.32373487096792
O15230	LAMA5	-0.0527994514452567	3.31454208961774	-1.41365255779165	0.207424649645795	0.999660365730703	-5.32397193057092
Q8N4P2	TTC30B	0.0529942401855118	3.2483225731287	0.379920716504983	0.717152023163077	0.999660365730703	-5.32403789463914
Q8N2A8	PLD6	-0.0766030517449134	3.31491558551474	-0.489098676793154	0.642219225747492	0.999660365730703	-5.32406006608124
Q86UL8-1	MAGI2	0.00320716431720042	3.31270370280067	0.0391081396272257	0.970079100700145	0.999660365730703	-5.32410706699221
Q9NQC1-1	PHF15; JADE2	0.0228808665996426	3.33714053138898	0.284039274067161	0.785973800137499	0.999660365730703	-5.32499345302586
A1Z1Q3-2	MACROD2	0.0381313096699784	3.3253953134343	0.599015244835892	0.571176499251288	0.999660365730703	-5.32500693990335
O75326-1	SEMA7A	-0.0685551707137952	3.3286653755929	-0.724278904530174	0.496284059930287	0.999660365730703	-5.32526435804679
Q8N165	PDIK1L	-0.00817648826607214	3.3082487255975	-0.105891187906118	0.919136911795666	0.999660365730703	-5.32537839573555
Q8TB45	DEPTOR	0.0128016723246422	3.31378799818278	0.149111202289076	0.886375132580489	0.999660365730703	-5.32565253349042
Q16514	TAF12	-0.0521151839753111	3.34247025377249	-0.683788743792014	0.519751225613067	0.999660365730703	-5.32566380719503
O43464	HTRA2	-0.0459554015179737	3.31260169531713	-1.06479881222472	0.328124020085156	0.999660365730703	-5.32575833125218
O00291	HIP1	0.0807651847557622	3.29286908647697	1.71946484117302	0.136571829839689	0.999660365730703	-5.32621366205274
Q9Y2V0-1	C15orf41	-0.0760911706930726	3.31144757627498	-0.669689233404613	0.528091334767799	0.999660365730703	-5.32623295348884
Q8TCD1	C18orf32	0.0500404345368262	3.29261685666612	0.56480714074745	0.592776468139992	0.999660365730703	-5.32624358896438
Q12882-1	DPYD	-0.0351723837802468	3.31387019736082	-0.552881755843768	0.600417168903807	0.999660365730703	-5.32690357391574
Q14642	INPP5A	-0.05207643687488	3.32565883541065	-0.328867415528678	0.753485431654102	0.999660365730703	-5.32697301864679
Q9H211	CDT1	0.0478293748026423	3.28912142063601	0.740447868937179	0.487115389194064	0.999660365730703	-5.3270237234209
Q7Z398	ZNF550	-0.0153042741630786	3.30293655282781	-0.0957821505026709	0.926827663575572	0.999660365730703	-5.32706688034981
Q9P203-1	BTBD7	-0.0280257312202468	3.31920283525826	-0.472895299135293	0.653080806442365	0.999660365730703	-5.3274159274087
Q96CW6	SLC7A6OS	-0.0484681951858928	3.32872653674908	-1.06455456322269	0.328226008709158	0.999660365730703	-5.32779745546183
P17020	ZNF16	-0.0440031230025598	3.33279616300864	-0.931603815933114	0.387662928313706	0.999660365730703	-5.32802613423544
P49798-3	RGS4	-0.0727450920049663	3.30762646476393	-1.14024770423068	0.297851558930341	0.999660365730703	-5.32841136929874
Q6P4A8	PLBD1	0.0626563457721005	3.32445071591595	0.862620164065606	0.42163980656674	0.999660365730703	-5.3284964074829
Q9ULW0	TPX2	-0.000982098877476096	3.32556166323325	-0.00866030302334497	0.993372290597867	0.999660365730703	-5.32869478840273
Q9NRX2	MRPL17	0.0550140736213874	3.30727613883494	1.18583609763009	0.280727238141006	0.999660365730703	-5.32885471658332
Q86TM6	SYVN1	-0.100451439027814	3.30331082433432	-0.554465960450561	0.599398905612186	0.999660365730703	-5.33019817020734
Q14156-1	EFR3A	0.0427087431787485	3.3106789569499	0.397525418475933	0.704803100645092	0.999660365730703	-5.33022036104032
Q3T906	GNPTAB	0.0397666430044429	3.31027587858231	0.77670729724039	0.46697923238253	0.999660365730703	-5.33028842635634
Q6ZN54	DEF8	0.0624157651387769	3.29678030996097	1.17686474606692	0.284029022380236	0.999660365730703	-5.3304433735366
Q9NSK7-4	C19orf12	0.000700573981835479	3.32180589822643	0.00671690188639438	0.99485954099649	0.999660365730703	-5.33055378270295
O15118	NPC1	0.0483817111799378	3.30225474219819	0.824364020691841	0.441415278121722	0.999660365730703	-5.33097103205001
Q86XI8	C19orf68; ZSWIM9	0.0172184764080352	3.30183146564889	0.24310341186368	0.816062196156873	0.999660365730703	-5.33155925251813
Q86V42-2	FAM124A	-0.014915994858004	3.30624186697776	-0.193041814851584	0.85332573688937	0.999660365730703	-5.33186073734671
Q15831-1	STK11	-0.00620930762867002	3.32855382939653	-0.0669075332243668	0.94883963421309	0.999660365730703	-5.33195429042186
Q9H6Y7	RNF167	0.00728746600802202	3.28304410135926	0.0918688880872428	0.929807176143081	0.999660365730703	-5.33318278031462
Q9Y2C4	EXOG	-0.032786368388228	3.31827033700089	-0.303929138437397	0.771495831396718	0.999660365730703	-5.33385019984774
P69849	NOMO1; NOMO3	0.0373593944610818	3.30386400941412	0.373095067158927	0.721965529970713	0.999660365730703	-5.3341922040898
P52198	RND2	0.0217488511383419	3.27860968451679	0.260116660699531	0.803511919090913	0.999660365730703	-5.3341930207189
O43529	CHST10	-0.0219420643095739	3.31294404076667	-0.243703567300211	0.815618429469164	0.999660365730703	-5.33453407479107
O15055-1	PER2	0.0349595444205957	3.33623222051738	0.395412952195628	0.706279799489789	0.999660365730703	-5.33459761593809
Q96NI8	ZNF570	-0.0300815387132957	3.33706849514023	-0.394732647047361	0.706755659292982	0.999660365730703	-5.33526546059485
Q13158	FADD	-0.0400494050191507	3.2973583310382	-0.937014656926994	0.385089255870003	0.999660365730703	-5.33530544400281
P22466	GAL	0.00924825026555483	3.29030008557854	0.117857732891604	0.910045468568462	0.999660365730703	-5.33561027675774
Q5K4L6-1	SLC27A3	0.0868865567450848	3.29323246305525	0.407963621210553	0.697527181201775	0.999660365730703	-5.33572740061514
Q92831	KAT2B	-0.00237878976604039	3.3316807779976	-0.0274493089123257	0.97899588166776	0.999660365730703	-5.33622877547347
Q9Y252	RNF6	-0.0186415645467392	3.32854054208887	-0.263260159372618	0.801199921125646	0.999660365730703	-5.33626569681468
P98173-1	FAM3A	-0.0542437913296318	3.31841107601944	-0.46891736735448	0.655761790591582	0.999660365730703	-5.33631978410203
Q9H6R6-1	ZDHHC6	-0.14934761675834	3.32085021075628	-0.841383277317343	0.432535446743813	0.999660365730703	-5.33642096093004
Q9NT68	TENM2	-0.0156206325153108	3.3203781191307	-0.166633324805068	0.873158776159356	0.999660365730703	-5.33708592390047
P98170	XIAP	0.0357634223494896	3.31876520822961	1.21763784828292	0.269287833076702	0.999660365730703	-5.33715449885856
Q6PL24	TMED8	-0.030409181173602	3.31783353730085	-0.475018702395392	0.651652027213885	0.999660365730703	-5.33789793488772
Q96K58-2	ZNF668	-0.0540614125903057	3.36089710686564	-1.10989274327212	0.30973766668851	0.999660365730703	-5.33814694648184
Q8WUX1-1	SLC38A5	-0.0259165759014392	3.3180519853053	-0.11375426746374	0.913161422332768	0.999660365730703	-5.33817914762933
Q9Y5E9	PCDHB14	-0.0146362699213997	3.31069433953994	-0.148699431902051	0.886686218969202	0.999660365730703	-5.33832144793968
Q9NRG7-1	SDR39U1	0.0519493011471829	3.29238238047563	0.565490978748193	0.592340043421053	0.999660365730703	-5.33904695730385
P80370-1	DLK1	0.0916684923421617	3.28817927416094	1.21759948191602	0.26930138705447	0.999660365730703	-5.33929292759254
Q9Y3D5	MRPS18C	0.0467089753803836	3.35116404220111	0.634817238524945	0.549086426774114	0.999660365730703	-5.33964536262854
P61006	RAB8A	-0.0833363932189877	3.34082535954745	-0.526791231310553	0.617328460957572	0.999660365730703	-5.33988622019618
P98174	FGD1	-0.041218233422934	3.3173873737272	-1.12526146219096	0.30367086383879	0.999660365730703	-5.34037974479687
Q9BXW7	CECR5; HDHD5	0.0829247631474644	3.31876290827866	1.58214337790065	0.164948319481977	0.999660365730703	-5.34040479920587
Q9NXE4-4	SMPD4	-0.195792289971822	3.30445667535288	-1.5398072392804	0.174778270460236	0.999660365730703	-5.34051445397639
Q9NQ34	TMEM9B	-0.0618735120918131	3.31344186430619	-0.505699827326933	0.631190787539629	0.999660365730703	-5.34060419166962
O43524	FOXO3	-0.0740131353779036	3.29170496890893	-0.64444182618899	0.543239920812819	0.999660365730703	-5.34064893731248
Q15291-1	RBBP5	-0.0359506945670016	3.3295029906405	-1.75164489471637	0.1306399578412	0.999660365730703	-5.34071907181
Q9NY97-1	B3GNT2	-0.0489243611658341	3.3235216073062	-0.621028059762712	0.557530978326382	0.999660365730703	-5.34091975490507
Q5VT25-2	CDC42BPA	0.060837356405043	3.3081849147005	0.935229725229153	0.385936795860073	0.999660365730703	-5.34133126335064
Q6ZVL6	KIAA1549L	0.0011339759000249	3.33378569594631	0.00973656849159622	0.99254865589027	0.999660365730703	-5.3414360345886
Q76G19	PDZD4	-0.0586450373931058	3.33492563799617	-0.665720857385071	0.530454229036098	0.999660365730703	-5.34163524981472
P82930	MRPS34	0.0522230590070754	3.31790278508513	1.3336795341212	0.230932221418353	0.999660365730703	-5.34201480831972
P36956-4	SREBF1	-0.0296134257843101	3.29442499198951	-0.338319514566616	0.746702609790779	0.999660365730703	-5.34263434739607
Q9BYH1-1	SEZ6L	-0.0739383043986304	3.33374072017473	-0.759715020749142	0.476342215578501	0.999660365730703	-5.34329482830218
Q14209	E2F2	-0.013017493292555	3.29766066973139	-0.149498029236846	0.886082910825604	0.999660365730703	-5.34346813424214
Q96BY9	TMEM66; SARAF	-0.0368180167347967	3.34021892392424	-0.311513430117645	0.76600127289216	0.999660365730703	-5.34398809822388
Q7KYR7-1	BTN2A1	-0.0140699831355744	3.30415372925514	-0.0842733789129532	0.935593826600422	0.999660365730703	-5.34545846792795
Q92604	LPGAT1	-0.0242289887329357	3.29332499573529	-0.231594048987697	0.824586728854108	0.999660365730703	-5.34571854161383
Q9HAV0	GNB4	-0.0587518243835975	3.32248036307508	-1.1439897775781	0.296413257638791	0.999660365730703	-5.34583927718055
Q9UH92	MLX	0.0340452304801987	3.29596963389065	0.267021430089584	0.798436463094223	0.999660365730703	-5.34621962674367
Q4ZIN3-1	C19orf6; TMEM259	-0.0311949438697735	3.29424665098511	-0.129975669098307	0.900854220748976	0.999660365730703	-5.34644723963333
Q9NP90	RAB9B	-0.0387446433945543	3.32768158064416	-0.25315219461326	0.808641926502906	0.999660365730703	-5.34689846644768
Q9HCP0-1	CSNK1G1	0.0625037076030742	3.29807543208326	0.471469487898613	0.654041102177063	0.999660365730703	-5.34717250742569
O15120	AGPAT2	-0.0695159432542026	3.30961461394382	-0.58344210602551	0.580950893102381	0.999660365730703	-5.34722311615013
P02458-2	COL2A1	0.0348558469390593	3.2502392850295	0.199450195899659	0.848530037622941	0.999660365730703	-5.34767644458411
Q8N8Q8-1	COX18	-0.00894548684378043	3.3044702588312	-0.102838739003644	0.921458184131625	0.999660365730703	-5.34787784717553
P59817	ZNF280A	-0.0026040916667069	3.33662085992871	-0.0363138934214601	0.972215786786201	0.999660365730703	-5.34793442626168
Q7Z353	HDX	-0.0125405907872247	3.29902240894626	-0.198862079651618	0.848969860462158	0.999660365730703	-5.3479967281103
Q6NSJ2-1	PHLDB3	-0.0328544979165078	3.31610215175563	-0.442534492773371	0.673684005417796	0.999660365730703	-5.34815858393787
Q9NXL9-1	MCM9	-0.0154964665898558	3.29836399791828	-0.234616531906719	0.822345496002112	0.999660365730703	-5.34825127560951
O43752	STX6	0.0472135658220747	3.303052866512	1.15750684892044	0.291266771156219	0.999660365730703	-5.34829072908321
P40189-1	IL6ST	-0.0500739751059914	3.30923964468439	-0.617827055059932	0.559502711460903	0.999660365730703	-5.34831553801221
Q8WW35	TCTEX1D2	-0.0700043680758524	3.30647632635755	-0.819634332943526	0.443906370526366	0.999660365730703	-5.34911807429169
Q8N6N2-1	TTC9B	0.0462502428747135	3.33167979998428	0.585299914249325	0.57977964476831	0.999660365730703	-5.34956059824002
Q5T1C6	THEM4	0.0520289803338849	3.33886491511374	0.861061159252384	0.422432678198784	0.999660365730703	-5.34969321333324
Q9NWS9	ZNF446	-0.0374726234638245	3.31564390898291	-0.60274656767833	0.568849342993029	0.999660365730703	-5.35031038156681
O15231-6	ZNF185	0.0325216321533818	3.27197911310049	0.471632929363032	0.653930986076561	0.999660365730703	-5.35045463265765
Q99487	PAFAH2	-0.0255167929064011	3.32177771973017	-0.275047737821365	0.792550174662391	0.999660365730703	-5.35116881523297
Q9UNK0	STX8	0.0887182265284888	3.28930049995278	0.989365456322796	0.360870633601486	0.999660365730703	-5.3514634604533
Q7Z5W3	BCDIN3D	-0.0189684484508848	3.29596208599754	-0.298158096281148	0.775686538288416	0.999660365730703	-5.35188708383563
O75638	CTAG2	-0.0260241796753254	3.33502461448226	-0.318523730249132	0.760935789607414	0.999660365730703	-5.35215846800533
Q99501	GAS2L1	0.0011602701244316	3.31556870146051	0.0151974078673448	0.988369812671306	0.999660365730703	-5.35242737307417
P42771-1	CDKN2A	-0.017839202409617	3.31040406417562	-0.277717752524023	0.790595351710805	0.999660365730703	-5.35249279547804
Q9H0V1	TMEM168	0.0386187168402855	3.35425173313999	0.326733585602509	0.755020039042282	0.999660365730703	-5.35249368148198
P36896-4	ACVR1B	-0.0309628542178439	3.30371447108813	-0.488730003231313	0.642465296506311	0.999660365730703	-5.35263979555946
Q9BWP8-10	COLEC11	0.0524215415637703	3.28857031956582	0.689820640718083	0.516209665887662	0.999660365730703	-5.35269198735871
Q96JY6-5	PDLIM2	-0.0258691606328726	3.31538751757029	-0.269649919904011	0.796507172229038	0.999660365730703	-5.35270373559458
Q5BKX5-1	C19orf54	0.0246171425741621	3.33604796756811	0.366162852733604	0.726868521505934	0.999660365730703	-5.3529657542164
Q9GZU1	MCOLN1	-0.00359513509029752	3.30602395623782	-0.0193220698578033	0.985213724029657	0.999660365730703	-5.35303837391217
O75509	TNFRSF21	-0.0437392582521934	3.31444192989094	-0.477415911622414	0.650040959003644	0.999660365730703	-5.35304707758089
Q8NI37	PPTC7	0.0591306239124576	3.31167841254245	0.527378031116811	0.61694520919954	0.999660365730703	-5.35311731783742
Q9Y3C4-3	TPRKB	-0.0391567403660568	3.30626358202457	-0.507069395176919	0.630285536671786	0.999660365730703	-5.35333280272148
P61081	UBE2M	0.0487873839151667	3.30931256243166	1.36412704333545	0.221711664306585	0.999660365730703	-5.35334514832639
P24863-1	CCNC	0.0607017642846699	3.31275169059834	0.915616565565353	0.395344777297819	0.999660365730703	-5.35335770809523
Q96GS6-2	ABHD17A; FAM108A1	-0.0313484705495318	3.29843207675731	-0.451229474347109	0.667750599849837	0.999660365730703	-5.35336233810334
Q96SM3	CPXM1	0.00472532945055361	3.30794081955715	0.0708658229464659	0.945818699116092	0.999660365730703	-5.35375001963297
A8MPS7-1	YDJC	-0.00881034547774186	3.31864070974801	-0.112874437564137	0.91382974114737	0.999660365730703	-5.35400497494764
Q9P0J1-2	PDP1	0.0619942566346003	3.30990247949716	1.34392499030405	0.227791667065601	0.999660365730703	-5.35404041001911
Q9P2N4	ADAMTS9	-0.0338591057565721	3.31782040863024	-0.584622748175075	0.580206398970109	0.999660365730703	-5.3544320464961
Q9Y4A0	JRKL	0.0132895292486898	3.35005187577133	0.19752413171448	0.849970667060212	0.999660365730703	-5.35451445322288
Q9H7P9-1	PLEKHG2	-0.0327753738756147	3.32661897822739	-1.39469286556177	0.212791841682041	0.999660365730703	-5.35470457307788
Q9NR77	PXMP2	-0.0633363875077683	3.33001768259055	-0.536458927499389	0.611031194967007	0.999660365730703	-5.35497631545072
Q3ZAQ7	VMA21	0.0413548332438984	3.28232015763956	0.29287420054231	0.779530783360588	0.999660365730703	-5.35574558257077
Q8NDF8-5	PAPD5	-0.0279837788560824	3.32538522963189	-1.58036015121475	0.165351571070603	0.999660365730703	-5.35574768250292
Q9Y297	BTRC	-0.0339293769489999	3.33239587473773	-0.718405358107483	0.499643425549175	0.999660365730703	-5.3565460773562
P11474-1	ESRRA	0.0309429742903253	3.28979149903505	0.362997845873736	0.729111801175029	0.999660365730703	-5.35662283687619
Q5TCY1-1	TTBK1	0.0424273547676796	3.31823447085103	1.29922032103475	0.241781857200554	0.999660365730703	-5.35666206483375
P31327-3	CPS1	0.0387476822447639	3.33147523768836	0.431996031154883	0.6809100274268	0.999660365730703	-5.35669255229947
P09668	CTSH	-0.0758478129302146	3.32956027880231	-0.96887196741153	0.370204469016782	0.999660365730703	-5.35701437873494
Q6P995-1	FAM171B	-0.0354078746520597	3.26921560053576	-0.364348919995041	0.72815383122106	0.999660365730703	-5.35704597283479
Q7Z449-1	CYP2U1	0.00166940292653405	3.30814762637353	0.0175695280491537	0.986554693139497	0.999660365730703	-5.35757555157848
Q14201-2	BTG3	0.0385484637215746	3.3068290931357	0.501803587576912	0.633769943035241	0.999660365730703	-5.35778742926641
O43909	EXTL3	0.0573515885376729	3.30715186284925	0.830833429787076	0.438024340906795	0.999660365730703	-5.35791660982288
Q6P3W2	DNAJC24	0.0382401728229487	3.32811616871476	0.783064453130373	0.463509768300522	0.999660365730703	-5.35850816355255
Q9NYZ1	FAM18B1; TVP23B	0.0669945653642871	3.32481078094685	0.516564653299347	0.624028810921238	0.999660365730703	-5.35855720669562
Q9Y587-2	AP4S1	0.069871770255276	3.31003271539499	0.608279048060819	0.565409432176984	0.999660365730703	-5.35906741164972
Q8IX21-2	FAM178A; SLF2	-0.0492942703846287	3.32406223560975	-1.00447416832364	0.354109701433037	0.999660365730703	-5.35908826222275
Q6P280	ZNF529	-0.0223113762874077	3.33643052876961	-0.284463076657194	0.785664305097723	0.999660365730703	-5.35950076138384
Q9UKG9-3	CROT	-0.0382311068627495	3.33125586109868	-0.706201296896746	0.506672294263668	0.999660365730703	-5.35953908406826
Q96BW1	UPRT	-0.036971472709504	3.3219347828865	-0.751077135347632	0.481151520365526	0.999660365730703	-5.35974252050306
Q5TA50	GLTPD1; CPTP	0.0339056359101655	3.30952123973718	0.547145286207062	0.604112621566238	0.999660365730703	-5.36007116685795
A6NKF1	SAC3D1	-0.0402692362662926	3.31787998327906	-0.981894457236047	0.364251510739815	0.999660365730703	-5.36046220121188
Q13795	ARFRP1	0.05374215545532	3.30972896922702	1.02389618605547	0.345567954656505	0.999660365730703	-5.36069221636186
Q8N6S4	ANKRD13C	-0.0353101309046657	3.29229926926411	-0.607615821765185	0.565821135004053	0.999660365730703	-5.36073903816704
Q9NUI1	DECR2	0.0186183226444878	3.28155444678832	0.313633977906499	0.764467659775798	0.999660365730703	-5.36095643505855
P82932	MRPS6	0.0560567949944369	3.34367628814246	0.734145836548816	0.490675145343945	0.999660365730703	-5.36097600187887
P31274	HOXC9	-0.0249829545985457	3.35244653358027	-0.423929565622884	0.686466312102018	0.999660365730703	-5.36122987469457
Q8NE22-1	SETD9	-0.0482296358612105	3.30578502763785	-0.626822843023927	0.553972476298317	0.999660365730703	-5.36144000408233
Q96MH2	HEXIM2	0.0107343089080691	3.29244217004668	0.15770310459151	0.879889235989942	0.999660365730703	-5.3615332622871
Q9H799-1	C5orf42	-0.0973847360401964	3.25045390538814	-0.590683627170104	0.576393448257557	0.999660365730703	-5.36159530052631
P57721-1	PCBP3	-0.0644196665649411	3.32712495568944	-0.791708678146469	0.45882138409511	0.999660365730703	-5.36167024306044
Q6ZT98	TTLL7	-0.021921879380573	3.28382873424553	-0.152807172277407	0.883583884043	0.999660365730703	-5.36254025250202
Q99439	CNN2	0.0439862062490174	3.31022217434303	1.19032261231055	0.279088435976736	0.999660365730703	-5.36272871500714
Q92870-4	APBB2	-0.0333893504486299	3.32654988511924	-0.56664528397827	0.591603791241134	0.999660365730703	-5.36290326309271
Q64LD2-1	WDR25	-0.0173244203098324	3.37365012928952	-0.142250176639527	0.891561388442126	0.999660365730703	-5.36298594849389
Q9UGK8	SERGEF	0.0153105342369456	3.30840730935257	0.208840460127911	0.841515742755318	0.999660365730703	-5.36342173842625
Q16587-5	ZNF74	-0.0254006652360127	3.30598945949563	-0.41791972767288	0.690620008017757	0.999660365730703	-5.3634517531553
O15427	SLC16A3	0.0705693182178599	3.30762973488123	0.47695857398112	0.650348157558164	0.999660365730703	-5.36353823444757
Q9NSU2-1	TREX1	-0.0496116781186762	3.34476842304357	-0.791768133868587	0.45878925388786	0.999660365730703	-5.36365821016965
Q9BY41	HDAC8	-0.0557168964868544	3.33691604014517	-0.640934840809541	0.545365702021602	0.999660365730703	-5.36376574315128
Q6PGQ7	BORA	-0.0221886138992455	3.32581791974007	-0.377335809720546	0.71897326113361	0.999660365730703	-5.36389439538542
Q9UEE5	STK17A	0.0112654656038657	3.30575834379349	0.139198869699395	0.89386978380026	0.999660365730703	-5.36410185115197
Q9UK96	FBXO10	-0.0398057157339295	3.32777895118906	-0.819784322191223	0.443827216333686	0.999660365730703	-5.36411189501424
Q06136	KDSR	-0.0106171304631095	3.31778590878413	-0.138161324086934	0.894654976052382	0.999660365730703	-5.3644330441612
Q96IL0	APOPT1	0.0316671649479522	3.36711687330418	0.383068772180947	0.714936762553545	0.999660365730703	-5.36446849692545
A0PK00	TMEM120B	-0.101318183480706	3.33743741508865	-0.531741123607743	0.614099732631244	0.999660365730703	-5.3646798286963
Q6ZMG9-2	CERS6	-0.0765417515173528	3.28152135841566	-0.645720087107358	0.542466396799078	0.999660365730703	-5.36468597866629
O95072-1	REC8	0.0165078437315985	3.3056971305655	0.257386402662262	0.805521757100384	0.999660365730703	-5.36471876670474
Q9Y575-3	GPR75-ASB3; ASB3	-0.0652259490170734	3.33611038139559	-0.851126888284129	0.427510984897545	0.999660365730703	-5.36478497337151
Q9H2K0	MTIF3	0.0630085240396434	3.32802154790779	1.04074416388999	0.338293593995452	0.999660365730703	-5.36481654392938
O60888-3	CUTA	0.0380014374524183	3.32823022960045	1.43568884445324	0.201342650941038	0.999660365730703	-5.36545581558627
Q6ZPD9-1	DPY19L3	-0.0897176262018904	3.31782782693286	-0.559644534641065	0.59607725955819	0.999660365730703	-5.3661161848664
O14730	RIOK3	0.0436679432771805	3.32542395345395	1.34286071894834	0.228116101320518	0.999660365730703	-5.36617235903278
Q6H8Q1-9	ABLIM2	0.0220591536282441	3.32664376194657	0.368847017890772	0.724968374657837	0.999660365730703	-5.36794391357545
Q8IW92	GLB1L2	0.0371394739926729	3.25219123251065	0.363817790741039	0.728530360681459	0.999660365730703	-5.3680062410063
P54259	ATN1	-0.0403446668749066	3.31623820517129	-0.908965225367899	0.398574888180912	0.999660365730703	-5.36836591157866
Q9NW15-1	ANO10	-0.0628666595524253	3.31408742397524	-0.438921244544645	0.676157293342095	0.999660365730703	-5.36840652404006
O60858-3	TRIM13	-0.128414633985048	3.2912794960775	-0.913686709896245	0.396279910971681	0.999660365730703	-5.3684782651339
P78368	CSNK1G2	-0.026790941706558	3.31400586830161	-0.244681165231001	0.814895735117882	0.999660365730703	-5.36903558837776
P55211-1	CASP9	-0.00201766004931021	3.31763747881321	-0.0309286051674637	0.976334471076664	0.999660365730703	-5.36917739589827
Q8NAV1-1	PRPF38A	-0.0702333432971046	3.32378618287912	-1.19018163117152	0.279139807094116	0.999660365730703	-5.37012516630907
Q6ZSJ8	C1orf122	0.013156340139907	3.09956122463986	0.179653981948381	0.86336646833482	0.999660365730703	-5.37072253266012
O75177	SS18L1	0.0359047040873081	3.32283305657811	0.457625778061168	0.663402519988386	0.999660365730703	-5.37093139828959
Q14789-2	GOLGB1	0.00629034657119407	3.31625244796243	0.0561321783433316	0.957067868826699	0.999660365730703	-5.37157270368837
Q96MD2	C12orf66	-0.0593693067382718	3.33987363643761	-0.793734175282288	0.457727694241413	0.999660365730703	-5.37181114790735
Q9P2J2	IGSF9	-0.0431352292417692	3.31022907648712	-0.81750330922606	0.445032084104886	0.999660365730703	-5.37187128198274
Q6P4F2	FDX1L	0.0352604937852559	3.33005560422137	0.551359179155212	0.601396754203849	0.999660365730703	-5.37233522896333
Q96T68-1	SETDB2	-0.0161149850571894	3.3367490999545	-0.174379858973279	0.867329825127917	0.999660365730703	-5.37238669407002
Q7Z494-1	NPHP3	-0.0377771643071684	3.33484429340518	-0.453629758452335	0.666117263424626	0.999660365730703	-5.37268116116334
Q9H792	PEAK1	0.0593949560441835	3.28911282392563	1.15551505696915	0.292020324379743	0.999660365730703	-5.37365995261357
Q96E39	RBMXL1	-0.0393335822467195	3.34544754207575	-0.41278869445851	0.694175701425445	0.999660365730703	-5.37372440999279
Q86Y97	SUV420H2; KMT5C	-0.043860857079737	3.38523261073518	-0.435310648555826	0.678633201195944	0.999660365730703	-5.37453548484333
Q9UMS6-2	SYNPO2	0.0361281605209844	3.31450778779128	0.692437652378434	0.514678059712878	0.999660365730703	-5.37470894301893
Q86UB9	TMEM135	-0.0733354171308596	3.30941261921407	-0.72777245025517	0.494293187354917	0.999660365730703	-5.37526399673599
A1L0T0	ILVBL	-0.0536882012136102	3.29397043438605	-1.22123672815251	0.268019060486793	0.999660365730703	-5.37541017991361
Q9NWA0	MED9	0.263672027828486	3.16097932552887	0.916906191923149	0.394720816157191	0.999660365730703	-5.37624694332395
Q96JB3-1	HIC2	-0.0532073642173743	3.3033909753186	-0.655376619782785	0.536645406695682	0.999660365730703	-5.37633429754175
O95563	MPC2	-0.0033138270750675	3.31696503347148	-0.0231759234169154	0.982265115360797	0.999660365730703	-5.37652263313857
Q5T3U5	ABCC10	-0.0132457826231202	3.34060639848614	-0.123171060147302	0.906013425819279	0.999660365730703	-5.37686443618747
P28370-1	SMARCA1	0.018847370263418	3.31855406977469	0.283151605403928	0.786622186849388	0.999660365730703	-5.37696187727048
Q9H6J7-2	C11orf49	-0.00657315728235648	3.29207514872745	-0.0962757461179485	0.926451936958904	0.999660365730703	-5.37750056841617
O75467	ZNF324	-0.0669155263078761	3.29423153456587	-0.599522316557795	0.570859910960946	0.999660365730703	-5.37780618859749
P08174-7	CD55	-0.0501269289553567	3.28600651438249	-0.596590410780193	0.572691898705763	0.999660365730703	-5.37834952699466
Q5RHP9	C1orf173; ERICH3	-0.0600969058959245	3.34624627801708	-1.14174621808583	0.297274883855702	0.999660365730703	-5.37843895901622
Q9NQ92	COPRS	0.00170616412917296	3.32931042100644	0.0138519266460591	0.989399394401687	0.999660365730703	-5.37925996683807
Q96GK7	FAHD2A	0.0438823394752395	3.32361171497177	0.93912608253104	0.384088547767824	0.999660365730703	-5.37940585853417
Q15185	PTGES3	-0.0838234925823872	3.30704480552356	-1.85586378007201	0.113112979743355	0.999660365730703	-5.38012667523898
Q9HB21-1	PLEKHA1	0.039198886682376	3.30552230869146	1.28512412282416	0.246349479368775	0.999660365730703	-5.38026473184261
Q32NB8	PGS1	0.0319659681523263	3.30869005052361	0.615581137391806	0.560888694322455	0.999660365730703	-5.38032539887374
Q9BQ48	MRPL34	0.0512025718113472	3.33820085781478	0.368842862942328	0.724971314331308	0.999660365730703	-5.38033552515896
Q9UKC9	FBXL2	-0.094866231892027	3.29187330539773	-0.361302389558406	0.730314712310127	0.999660365730703	-5.38083571585492
Q9UBS9-1	SUCO	-0.0891222602407461	3.30944829200761	-1.20789619566683	0.272748394293869	0.999660365730703	-5.38121988737744
Q15406	NR6A1	-0.0724958793766706	3.3038454490967	-0.672449991830535	0.526451508974832	0.999660365730703	-5.38168739103285
Q96FN4	CPNE2	0.0337026597524179	3.31250635236012	1.27085568600553	0.251050619526213	0.999660365730703	-5.38211920664174
Q86Z02	HIPK1	-0.0229764307558558	3.32076759980188	-0.288324732257561	0.782846197707489	0.999660365730703	-5.38311412684068
Q6TDP4	KLHL17	-0.0393440520471282	3.29382148044894	-0.454784477421994	0.665332218700324	0.999660365730703	-5.38316300824727
Q9H8M7-1	FAM188A; MINDY3	0.0597271232688691	3.31420290466541	0.876163742764618	0.414798418875853	0.999660365730703	-5.38330118263135
O00445	SYT5	0.0114113085325979	3.31385643959947	0.128099243253452	0.902276394510607	0.999660365730703	-5.38342124406423
Q00973	B4GALNT1	-0.0557016723929799	3.30191482529014	-0.939117905742774	0.384092419258818	0.999660365730703	-5.38392695831055
Q9UKA2	FBXL4	0.0257922050839827	3.30643645904331	0.396547361351931	0.705486626982885	0.999660365730703	-5.38509923557895
O94880	PHF14	0.0605351476667492	3.29681635759595	1.17388358635845	0.285133538608573	0.999660365730703	-5.38550753710119
Q8IV50	LYSMD2	-0.0679341351555839	3.35113369649321	-0.729437998857996	0.493345946232096	0.999660365730703	-5.38557569288184
Q9Y2G3	ATP11B	-0.0245543622940182	3.29294145879582	-0.357476127953565	0.73303250079861	0.999660365730703	-5.38570577726403
Q9UK53-1	ING1	0.0377411020188944	3.32421067211344	0.888511836919972	0.408633658235165	0.999660365730703	-5.38581093327825
P68366	TUBA4A	-0.0465654102449122	3.31707398509363	-0.843784110821294	0.431293405749536	0.999660365730703	-5.38583611691304
Q9BSI4-2	TINF2	0.0398393910766026	3.32811081126503	0.723679536291555	0.496626167144062	0.999660365730703	-5.38646122770567
A8K855-1	EFCAB7	-0.0585061322570582	3.30742244717505	-0.715524625303447	0.501296638570826	0.999660365730703	-5.38648749569953
Q8WWZ7-1	ABCA5	0.0167842895677479	3.29393492324852	0.246528300182461	0.813530776977967	0.999660365730703	-5.38666073949776
Q8TF68-1	ZNF384	-0.0852696739501223	3.3433696577749	-0.803560167694595	0.452448383064993	0.999660365730703	-5.387166002481
Q15165-1	PON2	-0.14281885576358	3.33662095826274	-0.767357566045291	0.472114998823943	0.999660365730703	-5.38737039484736
P80723	BASP1	0.156060820249433	3.29574268769785	1.85241633709943	0.113653723443273	0.999660365730703	-5.38761821900214
Q8TF44	C2CD4C	0.0229421991279455	3.30710545522862	0.242666099223001	0.816385600845333	0.999660365730703	-5.38766759736118
O77932	DOM3Z; DXO	-0.0423005559097724	3.29310730888103	-0.682261577717382	0.520650400318813	0.999660365730703	-5.38775455796858
Q8WXF0	SRSF12	-0.0442163998636346	3.30799940316979	-0.816441862732572	0.445593562342337	0.999660365730703	-5.38798577988075
Q86XK3-2	SFR1	0.0470267611927983	3.29857914871934	0.426520765428438	0.684679093744496	0.999660365730703	-5.38825111756158
Q8WUX2	CHAC2	0.0295437549040953	3.32243128847176	0.411079958747294	0.695361721432518	0.999660365730703	-5.38850718969796
P41217-3	CD200	-0.0347545873401894	3.30634104189247	-0.203577844768075	0.845444867562552	0.999660365730703	-5.38859632772983
O15151	MDM4	0.0182050100642863	3.29824116839584	0.215976932436541	0.836195589042397	0.999660365730703	-5.38862522027544
O43505	B3GNT1; B4GAT1	-0.00540039782804284	3.33268513937423	-0.0449139926914237	0.965640412264652	0.999660365730703	-5.38911242852074
Q7L9B9	EEPD1	-0.0680127052344632	3.3186848790063	-0.795064096574536	0.457010597325976	0.999660365730703	-5.38953623548888
Q9NR56-1	MBNL1	-0.0464199496148963	3.29467428958616	-0.841631483149795	0.43240691907696	0.999660365730703	-5.39007528911312
Q9NP87	POLM	0.00740588737662843	3.31353157742358	0.10021622709949	0.923453184861262	0.999660365730703	-5.39048258443267
Q6P0Q8	MAST2	-0.0259475087890487	3.31116026056216	-0.410481568790793	0.695777283047977	0.999660365730703	-5.39048449136453
Q9Y324	FCF1	0.0376868997881257	3.31358384341613	1.11859503927304	0.30629008164324	0.999660365730703	-5.39075170734213
Q499Z4	ZNF672	-0.0840228239315382	3.29890641779416	-0.697397992385657	0.511783246079288	0.999660365730703	-5.39076077039978
Q9BUV8-5	C20orf24	-0.131661917369744	3.36798209983267	-0.575933470121381	0.58569895592408	0.999660365730703	-5.39089129695691
P51790-2	CLCN3	0.0249328108795765	3.32205983705569	0.464110679005274	0.659008845080342	0.999660365730703	-5.39094571836694
Q8NEM0	MCPH1	-0.0368247153609569	3.3262551153905	-1.01902639454484	0.347693943157915	0.999660365730703	-5.39114237133317
Q8WUY8	NAT14	-0.0377281299979891	3.29499993729178	-0.452891401471811	0.666619484573354	0.999660365730703	-5.39147706338616
O60337	MARCH6	-0.105381326935088	3.37649976595061	-0.582983045700056	0.581240522261082	0.999660365730703	-5.39182681969208
P0C1Z6	TFPT	-0.0256817986864926	3.31362559014237	-0.46479672046401	0.658544903249321	0.999660365730703	-5.39190304402365
Q9NVX2	NLE1	0.035211832147341	3.3018346885276	1.5953283088888	0.161995626191304	0.999660365730703	-5.39198746649552
Q719H9	KCTD1	-0.0536145900648584	3.35675499586693	-0.587852632997733	0.578172585330183	0.999660365730703	-5.39236198111107
P39060-3	COL18A1	-0.057505393557966	3.32545449720619	-0.41466998873991	0.692871007804902	0.999660365730703	-5.39247866217613
P53779	MAPK10	-0.0381407861721031	3.35591448657712	-0.480726911487207	0.6478191777161	0.999660365730703	-5.39263810127674
Q9BTK6	PAGR1	0.015069995846342	3.22998616204997	0.146443259940261	0.888391114974387	0.999660365730703	-5.39263824317645
O60765	ZNF354A	-0.0448670303616832	3.31200889685852	-0.484602410554019	0.645223646281984	0.999660365730703	-5.39285840438978
Q9BYN0	SRXN1	-0.0364168411487332	3.30775411047732	-0.629206108237283	0.552513041284552	0.999660365730703	-5.3932925474547
Q9P0T7	TMEM9	-0.00683564251002065	3.31903361295235	-0.0527761337142023	0.959631837045042	0.999660365730703	-5.39341127831184
P17029	ZKSCAN1	-0.0506617004379738	3.35330595291382	-1.06027887751683	0.330015581766266	0.999660365730703	-5.39378073937783
Q9Y6N1	COX11	-0.0803372598099247	3.32954196295321	-0.396380398830667	0.705603340794781	0.999660365730703	-5.39413790172594
O60831	PRAF2	-0.0152374118369613	3.31639330904953	-0.200614876909142	0.847659207448796	0.999660365730703	-5.3941862664237
O75298	RTN2	-0.0149278897220533	3.27627405069156	-0.215252291121911	0.836735372338549	0.999660365730703	-5.394416832507
Q96CS4	ZNF689	-0.0388653861813987	3.34577067291584	-1.1204657093341	0.305553193948071	0.999660365730703	-5.39456544433047
Q9UK32	RPS6KA6	-0.0330091090711595	3.32094970345686	-1.20302671370607	0.27449258315326	0.999660365730703	-5.39467137023335
Q96N66-1	MBOAT7	-0.0663349684078639	3.29778678766006	-0.361614329596956	0.730093330319772	0.999660365730703	-5.39495589671352
A6NMB9	FIGNL2	0.0327275567498543	3.32155838295099	0.635983479909691	0.548375895166436	0.999660365730703	-5.3953374396741
P35080-1	PFN2	0.047751802244395	3.2993715562629	1.21945256194591	0.26864741156934	0.999660365730703	-5.39575270463666
Q8NFJ9-2	DPP3; BBS1	-0.0456207863239299	3.32304815498041	-0.804858471562297	0.451754099686517	0.999660365730703	-5.39579556573528
Q9UH36	SRRD	-0.0461850836586806	3.32003778906034	-0.70468267973512	0.507551529097011	0.999660365730703	-5.39599710049416
Q9BSF4	C19orf52; TIMM29	-0.0450494866648567	3.31108605379498	-0.568570237339827	0.590377182055283	0.999660365730703	-5.39600941540493
Q8WTS1	ABHD5	-0.00458545235933643	3.30929218898789	-0.0485535696698851	0.962858562044962	0.999660365730703	-5.39602165215475
Q13424	SNTA1	0.0259140774012679	3.2958886379725	0.299372610470087	0.774803910689278	0.999660365730703	-5.39605103142311
Q9BQC6	MRP63; MRPL57	0.0454523683689974	3.35476363669676	0.97587503958243	0.366993697961784	0.999660365730703	-5.39659527569136
P52209	PGD	0.0330058975922925	3.31118280511474	1.96108408384307	0.0977878453323783	0.999660365730703	-5.39660662742845
O75879	PET112; GATB	0.0571776766442962	3.32871916071344	1.35249112163361	0.225195459785491	0.999660365730703	-5.39669243564831
Q93100-1	PHKB	0.036682114096917	3.30871366151854	1.57281538967713	0.167068096936566	0.999660365730703	-5.39690745267403
Q9BX40-3	LSM14B	0.045223657679264	3.31916056386838	0.895233281038555	0.40530714230212	0.999660365730703	-5.39721181228379
Q8IVS2	MCAT	0.043678041489546	3.3356397844486	1.27085157908332	0.251051984000252	0.999660365730703	-5.39742505234054
Q6NUJ5	PWWP2B	0.0192063368077962	3.33851792718349	0.312164192271513	0.765530507449433	0.999660365730703	-5.39761236987933
Q9Y2Z9-1	COQ6	0.0738789811525082	3.33523463319211	0.963931052215871	0.372483048434285	0.999660365730703	-5.39764561208511
Q9BYM8	RBCK1	0.0335967189126206	3.31783514807953	0.532190716610962	0.613806938775799	0.999660365730703	-5.39767465672241
Q674X7-1	KAZN	-0.0228438218486844	3.30300107159491	-0.327561299156766	0.754424618054174	0.999660365730703	-5.39803824003357
O43677	NDUFC1	0.163742837184531	3.27536279261838	0.902422299652923	0.401771950980389	0.999660365730703	-5.39842130120892
Q9UI14	RABAC1	-0.028051670201637	3.32978257026712	-0.338238253191542	0.746760818047442	0.999660365730703	-5.39882569018921
Q96DX4	RSPRY1	-0.018627960413641	3.2990815436642	-0.126628170470421	0.903391623226065	0.999660365730703	-5.39938467229631
Q8NF64	ZMIZ2	-0.0615461036735482	3.35619927920375	-0.979148486038071	0.36550044059525	0.999660365730703	-5.39946386086591
P15884-3	TCF4	-0.0677567326729398	3.32045963394368	-1.03701683902509	0.339892129851781	0.999660365730703	-5.39949035008365
Q14590-1	ZNF235	-0.0301161288678907	3.32218050988899	-0.382649674474935	0.715231503022522	0.999660365730703	-5.39953237309828
Q9H672-1	ASB7	-0.0507487366266725	3.29858584085902	-0.621566207563705	0.557199915037075	0.999660365730703	-5.39983019925389
Q9BQA5	HINFP	0.00234916355231872	3.31885693703006	0.0352026369181072	0.973065606633234	0.999660365730703	-5.3999196579696
Q66K64	DCAF15	-0.0373284790413472	3.31718082478826	-1.1428429935197	0.296853409099013	0.999660365730703	-5.40051142033999
Q14494-1	NFE2L1	-0.0333555554655233	3.30822207073178	-0.669666931065781	0.528104595260129	0.999660365730703	-5.40070309986106
Q0P651-1	C4orf29; ABHD18	0.0617816027131872	3.31411076860995	0.603540378269287	0.568354999718902	0.999660365730703	-5.40156007831065
Q96EH3	MALSU1	0.132295143490552	3.24887350786707	0.958267044011719	0.375108614301468	0.999660365730703	-5.40187003753636
Q05469-1	LIPE	0.0425413386205602	3.31283352406992	0.923871042672588	0.391364045526346	0.999660365730703	-5.40241154829311
Q96QE5	TEFM	0.048965286958108	3.33202630352902	0.920827312171961	0.392828291627582	0.999660365730703	-5.40275426828253
Q96AV8	E2F7	0.0139981505628304	3.30138484506589	0.15521383413166	0.881767321695147	0.999660365730703	-5.40282352509757
Q9NPR2-1	SEMA4B	-0.0300583446770466	3.31368253272529	-0.435991909179209	0.678165699581941	0.999660365730703	-5.40286575890871
Q8N4P3	HDDC3	-0.0572855776501684	3.31046038945516	-0.7565609338553	0.478094436193523	0.999660365730703	-5.4032685647006
Q70CQ3	USP30	-0.0501799030284571	3.31322442814069	-0.446046895732297	0.671284027619114	0.999660365730703	-5.40333062534512
P12829	MYL4	-0.0289515765199819	3.3533358522441	-0.230180544345805	0.825635496000249	0.999660365730703	-5.40336233067733
Q9Y483	MTF2	-0.0496941504281613	3.29587083676838	-0.464542122589169	0.658717057959608	0.999660365730703	-5.40359996447174
Q14244	MAP7	-0.0385677057795548	3.32517429796543	-0.812130442160926	0.447879449458634	0.999660365730703	-5.40362941155093
Q9Y5G0-1	PCDHGB5	0.0515519138446743	3.26398448189375	0.586857524541569	0.578798738102482	0.999660365730703	-5.4036709278837
Q969H6	POP5	-0.0257382777752875	3.30069674325079	-0.371081598123826	0.723388129932565	0.999660365730703	-5.40383261446111
Q99418	CYTH2	0.0125698901366371	3.28434077062223	0.170890210640823	0.869954535218362	0.999660365730703	-5.40401922374252
Q8WV92	MITD1	0.0139328798367668	3.28626583532448	0.155511113836372	0.881542987748796	0.999660365730703	-5.40412065929348
O60613-1	SEP15; SELENOF	-0.00663928304301012	3.30399127479223	-0.0431792825346297	0.966966498577364	0.999660365730703	-5.40457364374962
P98175-1	RBM10	0.0076160836268794	3.2694840594126	0.078558946393096	0.939950245108324	0.999660365730703	-5.40475923292112
Q9HCE0-1	EPG5	0.0312684875048427	3.31843706227296	0.486369718480979	0.644041844341794	0.999660365730703	-5.4048939593931
Q86XP1	DGKH	-0.0393543412586784	3.32933512158297	-0.952810528471615	0.377651670654625	0.999660365730703	-5.40508638273141
Q86SR1	GALNT10	-0.0244363127202509	3.30810946151735	-0.379526087516306	0.717429933886282	0.999660365730703	-5.40530283307883
Q8IWK6	GPR125; ADGRA3	-0.0579919223765177	3.3074716731736	-0.903270910140652	0.401356197714578	0.999660365730703	-5.4060133296282
Q92536	SLC7A6	-0.01200411841748	3.30040039114901	-0.0782441663744996	0.940190286609616	0.999660365730703	-5.40602046739975
P55198	MLLT6	-0.015969340955001	3.31120242707106	-0.222450715683957	0.831377663888185	0.999660365730703	-5.40605087235007
Q9BWU1-1	CDK19	0.00482786964477058	3.33021594424729	0.0303506812686303	0.976776519019145	0.999660365730703	-5.40697995311673
O43791	SPOP	-0.0398315099128468	3.31833592219182	-0.828059522439478	0.439475954262584	0.999660365730703	-5.4071249145087
Q99674-5	CGREF1	0.0281944923056246	3.28570989396522	0.416622684699336	0.691518017637857	0.999660365730703	-5.40714116241679
P84022	SMAD3	-0.0374536047703079	3.30663752062587	-0.379467403348398	0.717471265262972	0.999660365730703	-5.40726341068004
P05165-1	PCCA	0.0600639815616589	3.31598025681127	1.5831346722947	0.164724556594432	0.999660365730703	-5.40788190432652
Q86V97	KBTBD6	-0.0725239522359263	3.32940486514204	-1.15428616545152	0.292486076243697	0.999660365730703	-5.40806016797536
Q9UNK9	ANGEL1	-0.0149940381874965	3.30792466590988	-0.185970316517619	0.85862566437744	0.999660365730703	-5.40821261638163
Q8TE69-1	CXorf40A	-0.0340651926357908	3.31878254981971	-0.391937079349437	0.708712627271246	0.999660365730703	-5.40827474030333
O95620	DUS4L	0.00546713759898647	3.28168809348362	0.0759392665151595	0.941948140248056	0.999660365730703	-5.40829301548545
P25490	YY1	-0.0658798028768933	3.35980814519059	-1.4475858009399	0.1981277780943	0.999660365730703	-5.40915592653348
Q16739	UGCG	0.0170056631318106	3.32461647901668	0.288204290378527	0.782934037841521	0.999660365730703	-5.40916276514965
Q96I34	PPP1R16A	-0.0162588662153529	3.28452656696053	-0.187848921584175	0.857216890757793	0.999660365730703	-5.40931103693771
Q969P0	IGSF8	-0.0310995577616859	3.31236043626028	-0.370711804704414	0.723649536482777	0.999660365730703	-5.40974980590154
Q8IWZ3-6	ANKHD1-EIF4EBP3; ANKHD1	-0.00250700002046852	3.30059166328354	-0.0329519843357047	0.974786883329116	0.999660365730703	-5.41011750996908
Q93075	TATDN2	-0.0436212885533235	3.30703375533309	-0.877512611459471	0.414121623755185	0.999660365730703	-5.41023691253152
Q8WWW0-2	RASSF5	0.0011284509994985	3.32314239737826	0.0112626134634382	0.991380835529148	0.999660365730703	-5.41034543192281
Q6PCB8	EMB	-0.0561723730437725	3.31981172215719	-0.440468872489449	0.675097388496364	0.999660365730703	-5.41049167506699
O75398	DEAF1	0.0221004220065642	3.32999025849551	0.380510416243141	0.716736825719568	0.999660365730703	-5.41080944545953
Q8IV63	VRK3	-0.0283780683870863	3.31716071127185	-0.550795232071113	0.601759814780527	0.999660365730703	-5.41093354925439
O75676	RPS6KA4	-0.0267911030993195	3.31532043759759	-0.4260875745816	0.684977721393047	0.999660365730703	-5.4110930997306
Q6ZTU2-6		0.05340629982944	3.27331097888549	0.499890971743133	0.635038089653911	0.999660365730703	-5.41109688652785
Q96AD5-1	PNPLA2	-0.0128304148996592	3.32427301553038	-0.124007938168519	0.905378633792027	0.999660365730703	-5.41116272231932
O75110	ATP9A	0.0546322668647953	3.28396940168138	0.536552166018352	0.610970637987619	0.999660365730703	-5.41143574665813
Q8N5L8	RPP25L	-0.00798410478851967	3.31697687325146	-0.0569244483322627	0.956462667306543	0.999660365730703	-5.41195700588018
P11216	PYGB	-0.0344608463759341	3.30992843494777	-1.81559267374599	0.119591949243211	0.999660365730703	-5.41201936914931
Q8N7R7-1	CCNYL1	-0.00939309509729305	3.28359224915647	-0.10181774268724	0.922234804139102	0.999660365730703	-5.41206001931612
O95199-1	RCBTB2	0.0187432610777423	3.27618773293521	0.260573601152389	0.803175709787971	0.999660365730703	-5.41274519568111
Q9NVM6	DNAJC17	0.0358202386351693	3.31122412913042	1.16824246406173	0.287233622801151	0.999660365730703	-5.41312157664244
P15622-1	ZNF250	-0.087401130948999	3.30316163471811	-0.832440797333357	0.437184789599571	0.999660365730703	-5.41313309659313
P58335-4	ANTXR2	0.0402625518513857	3.29270974171808	0.300359597765526	0.774086906163296	0.999660365730703	-5.41326756632356
Q8N141	ZFP82	-0.0391805183314014	3.35293433864088	-0.494215045936414	0.638809463041283	0.999660365730703	-5.41339192674149
Q9Y672	ALG6	-0.0739167699697694	3.30863473836875	-0.350073045436255	0.738302940755534	0.999660365730703	-5.41342581818114
Q1MSJ5-3	CSPP1	-0.0403900342121646	3.30688399929812	-1.18877574071899	0.279652534673484	0.999660365730703	-5.41350601047745
Q8NEY8-3	PPHLN1	-0.0482027804921725	3.29998571075928	-0.937312552181508	0.384947946500843	0.999660365730703	-5.41372039013535
Q8N573-1	OXR1	-0.00394955181412865	3.33127595079685	-0.0607603985445392	0.953532908799499	0.999660365730703	-5.41426894892383
Q9ULN7-5	PNMAL2; PNMA8B	-0.0495677167366902	3.32675892097991	-0.421808781038848	0.687930730077589	0.999660365730703	-5.4152026210051
O60336	MAPKBP1	0.0357567906135229	3.30986749369393	0.837683783698563	0.434454465003575	0.999660365730703	-5.41546393719108
P22694-2	PRKACB	-0.101333547035081	3.39391007411133	-0.573164975587363	0.587455357366556	0.999660365730703	-5.41590379566707
O60658-1	PDE8A	-0.0210482057227554	3.33120201779082	-0.364166784632765	0.728282941701463	0.999660365730703	-5.41607042264209
Q9BXS9-1	SLC26A6	0.00576456270761895	3.29049075266659	0.0445523630524101	0.965916847566012	0.999660365730703	-5.41678880890382
Q9BT04-1	FUZ	-0.00906619681724725	3.29360331196717	-0.122150167147914	0.906787900746541	0.999660365730703	-5.41704686787328
Q9BQ67	GRWD1	-0.0370118888031641	3.3249059440412	-1.49353952121737	0.186151211773451	0.999660365730703	-5.41754425134472
P42702-1	LIFR	0.0211823472828154	3.2740877251194	0.232871066044588	0.823639571796389	0.999660365730703	-5.41762489491763
Q9NZC3	GDE1	-0.0216244914814215	3.30130333004745	-0.347149989837386	0.740388261693557	0.999660365730703	-5.41767077763737
Q9Y5A6	ZSCAN21	0.0243043107554922	3.35184835630912	0.354273553555202	0.73531055581398	0.999660365730703	-5.41807398952403
Q53G59-2	KLHL12	-0.00238117709380674	3.33669963909631	-0.0273423872787826	0.979077673894332	0.999660365730703	-5.41849971071945
Q5T5C0-1	STXBP5	-0.03077232890608	3.33325218078564	-0.436085648493999	0.67810138512373	0.999660365730703	-5.4186565218954
Q8N5D0-1	WDTC1	-0.0402012085101795	3.33006305527436	-1.2694606023782	0.251514495359268	0.999660365730703	-5.41926525125359
Q00987-11	MDM2	-0.0178034797939497	3.32080572394012	-0.207992706494669	0.84214834977766	0.999660365730703	-5.41970929580133
Q8NBZ7-2	UXS1	-0.0146791052736326	3.32529514835174	-0.161754445541732	0.876834449534425	0.999660365730703	-5.42038746691874
Q06828	FMOD	-0.0509420429485428	3.28378434625133	-0.429456320035466	0.682657067455529	0.999660365730703	-5.42069954857017
P78310-1	CXADR	-0.0682576173729956	3.32702344605464	-0.595432623088886	0.573416310798884	0.999660365730703	-5.42091487703587
Q5T2D3	OTUD3	0.0401452024170202	3.30760720389535	0.877145358882005	0.414305810783068	0.999660365730703	-5.42094446288033
Q9UFN0	NIPSNAP3A	0.0639636497607341	3.30480165481558	0.709194079333316	0.504942533946617	0.999660365730703	-5.42186666359117
Q86Y25	ZNF354C	-0.0293977070112676	3.30075589436859	-0.388181730291492	0.711345307664156	0.999660365730703	-5.42216524734501
Q9ULD2-1	MTUS1	0.013018092891276	3.32604234148338	0.184546584701347	0.859693707612196	0.999660365730703	-5.42273381533481
O15400	STX7	0.0521225114279562	3.29381479863156	0.980092244928102	0.365070816306819	0.999660365730703	-5.42277646195961
Q9Y343	SNX24	-0.0783119064330767	3.31228389348852	-0.898477742951325	0.403708773515453	0.999660365730703	-5.42314230996425
Q8ND76	CCNY	-0.039705292483497	3.29807731368346	-0.339912740431636	0.745561738480715	0.999660365730703	-5.42339266089113
Q96E09	FAM122A	-0.0100026342286241	3.29897364990684	-0.155620129523484	0.881460725081969	0.999660365730703	-5.42348420094445
Q9H1J1-1	UPF3A	-0.0451709612730956	3.33121964378545	-0.562860842390484	0.594019616080442	0.999660365730703	-5.42370238863948
Q15797	SMAD1	-0.031832784706676	3.36067541556574	-0.229473213551835	0.826160457187113	0.999660365730703	-5.4237905448926
Q9NS86	LANCL2	0.0505360636360275	3.30706232458793	1.40932350841763	0.208639104536103	0.999660365730703	-5.42445826449773
P10909-2	CLU	0.0274117531995636	3.27535968285427	0.475270990018782	0.651482377461444	0.999660365730703	-5.42447993596114
Q53HV7-1	SMUG1	-0.0550859271438442	3.31633490771986	-0.709786234899042	0.50460074925646	0.999660365730703	-5.42452162979285
Q96QD5-1	DEPDC7	0.000241706586856075	3.31641141615971	0.00335822060037926	0.997429929857604	0.999660365730703	-5.42453138272517
Q9Y463	DYRK1B	-0.0219452751165039	3.31531955912383	-0.28101838185536	0.788181140728567	0.999660365730703	-5.42489050624719
Q9P278-2	FNIP2	0.0143591684026923	3.32128129208337	0.234373504196439	0.822525638360097	0.999660365730703	-5.42505002974572
O00287	RFXAP	-0.0333407324024344	3.33759741897329	-1.16359006039297	0.288975550758117	0.999660365730703	-5.42530394660827
Q8WZ42-12	TTN	-0.0355716324759377	3.24866132122918	-0.096556990684761	0.926237861964628	0.999660365730703	-5.42594817048688
Q9UH99-2	SUN2	-0.146913774683558	3.29311941588598	-1.25692381168296	0.255717079510952	0.999660365730703	-5.42672210618963
P23435	CBLN1	-0.049605528956089	3.32658590283511	-0.967535677630927	0.370819636166385	0.999660365730703	-5.42679373913223
Q15329	E2F5	0.0360639324200055	3.33186802889812	0.390880194710344	0.709453110082503	0.999660365730703	-5.42692876154303
P36955	SERPINF1	-0.202399834586988	3.31693612919956	-0.547158457619264	0.604104121673665	0.999660365730703	-5.42719576102158
P62341	SELT; SELENOT	-0.0821211136735368	3.29562960765695	-0.63896364006716	0.546562852671565	0.999660365730703	-5.42752751597211
Q8N0U8	VKORC1L1	-0.0308423582568445	3.3227552956626	-0.17201828476123	0.86910586291703	0.999660365730703	-5.42753726243169
Q15714-1	TSC22D1	-0.0435378163207381	3.32997468280347	-0.759982903473464	0.476193601699407	0.999660365730703	-5.42826986658741
Q9UBZ4	APEX2	-0.0278936130264477	3.31252228924519	-0.523554184187552	0.619445020691784	0.999660365730703	-5.42851630587857
Q6NUS6	TCTN3	0.000457579396387509	3.27626883630532	0.00477296179331187	0.996347226523295	0.999660365730703	-5.42898922831704
O15492	RGS16	0.00725219131123683	3.32068472167604	0.115394757164116	0.911915514853967	0.999660365730703	-5.42911512606242
Q9NRP7	STK36	0.0126696772047628	3.29782807200962	0.12014906162707	0.908306314852044	0.999660365730703	-5.42920363487613
P51159-1	RAB27A	0.00176536507222721	3.28562110508768	0.0177855642143237	0.986389388917828	0.999660365730703	-5.42980115304103
Q9NZB8	MOCS1	0.0183138031247025	3.30508575844268	0.294832788553112	0.778105027318384	0.999660365730703	-5.43024298284839
P0C2W1	FBXO45	0.0374396600505571	3.29869835008476	0.908036795639355	0.399027361941625	0.999660365730703	-5.43050418799091
A6NNA2	SRRM3	-0.0347698600616638	3.29008811693019	-0.337899455479776	0.747003521652987	0.999660365730703	-5.4305162482638
Q9HAW0	BRF2	0.0105709166855091	3.31326639288699	0.123350064558694	0.905877640261125	0.999660365730703	-5.43063884421812
O00217	NDUFS8	0.0778225903442359	3.31835488298595	1.31394090616801	0.23709249622238	0.999660365730703	-5.4306472508415
Q86U06-2	RBM23	0.0391521989849052	3.30142732849962	0.633120854124145	0.550120974918452	0.999660365730703	-5.43067257325087
Q12852-2	MAP3K12	0.00854235901793453	3.33173369139226	0.125190849147669	0.904481498441117	0.999660365730703	-5.43100510282272
Q9Y385	UBE2J1	0.0168408030166536	3.27449420041648	0.152254091430931	0.884001462917939	0.999660365730703	-5.43109501699825
Q8TBC5-3	ZSCAN18	-0.014912749451025	3.33892948609267	-0.229588292507609	0.826075042071198	0.999660365730703	-5.43124664924201
Q05940	SLC18A2	-0.0365325484748537	3.32055003308186	-0.329513900385337	0.753020736141769	0.999660365730703	-5.43125805900329
O15527-4	OGG1	-0.00671520825506187	3.29695436913254	-0.102910375095991	0.921403697753767	0.999660365730703	-5.43152588080859
Q8N4J0	C9orf41; CARNMT1	-0.0351822248185695	3.30115319033777	-0.539300662167534	0.609187049338709	0.999660365730703	-5.43171814718631
Q9GZQ3	COMMD5	0.0354950840510034	3.30687730390542	0.90997539639576	0.398083022139567	0.999660365730703	-5.43173841781329
P20393	NR1D1	0.0146950322233509	3.33713941109625	0.180848618595684	0.862469333155645	0.999660365730703	-5.43175294822579
Q9BWW4	SSBP3	-0.044055783523378	3.31794760753612	-0.710265120514681	0.504324455635197	0.999660365730703	-5.43257669160853
Q9NQG7-4	HPS4	-0.0282470855812562	3.31724002358614	-0.580455620390512	0.582836651590927	0.999660365730703	-5.4328659370315
P38435-1	GGCX	-0.0114301467822082	3.26211218519584	-0.0947043050606784	0.92764819493026	0.999660365730703	-5.43305214696085
P05060	CHGB	0.0541190128055218	3.30317521995922	1.37234525964431	0.219280606274001	0.999660365730703	-5.43316578197379
Q9UFB7	ZBTB47	-0.0737166412240353	3.35165418057626	-0.277558841009046	0.790711650492619	0.999660365730703	-5.4335654973822
Q5SW79-1	CEP170	-0.0871291763161337	3.32798168945845	-0.774412210857373	0.468236268313326	0.999660365730703	-5.43356807333396
Q13873	BMPR2	0.0390172091073481	3.29707002949892	0.549917340112849	0.602325237658257	0.999660365730703	-5.43374713620711
Q9H1E5	TMX4	-0.0450578743346541	3.31551910970377	-0.339252019904125	0.746034779105979	0.999660365730703	-5.43398427285471
Q9H7T9-2	AUNIP	-0.0451717443349122	3.3208530345633	-0.730730349515498	0.492611801937555	0.999660365730703	-5.43413492594918
Q6PGN9-1	PSRC1	0.0596153053508236	3.24326209157794	0.324781007299641	0.756425369772117	0.999660365730703	-5.43444211542457
Q9NWD8-1	TMEM248	-0.0325577504530078	3.31615202551061	-0.52576043574507	0.618002016049566	0.999660365730703	-5.43466371078067
Q9NWH2	TMEM242	0.00570321081061275	3.31714266445358	0.0566131587095129	0.95670045236158	0.999660365730703	-5.43487623580099
Q02548-1	PAX5	-0.0230699506730869	3.31843397885613	-0.321169694275495	0.759027234221346	0.999660365730703	-5.43495084935274
Q9BY27	DGCR6L	0.00202140840024056	3.32354528045498	0.0270291149620267	0.979317320548217	0.999660365730703	-5.43497080642548
P41220-1	RGS2	-0.0491152330780219	3.30928608491435	-0.627678159285951	0.553448432924815	0.999660365730703	-5.43530059145359
P02545	LMNA	-0.0669930622032131	3.3592004519862	-1.14633858454601	0.295513477908762	0.999660365730703	-5.43539782388842
Q969Z0-1	TBRG4	0.0842598801021228	3.34012456898201	1.75581247813523	0.129890386974571	0.999660365730703	-5.43559181288046
Q16587-1	ZNF74	-0.062827813825499	3.31468212383958	-0.927847629733148	0.38945735810003	0.999660365730703	-5.43571521617238
O76054	SEC14L2	-0.0260891060721646	3.32972383977927	-0.507677214633091	0.629884008152503	0.999660365730703	-5.43615562195998
Q9Y2G8	DNAJC16	-0.0657689165230675	3.31121975516512	-0.848840972011664	0.428685879514931	0.999660365730703	-5.4362023316644
Q96DC9	OTUB2	-0.00125647320552136	3.314421713901	-0.0203648462699095	0.9844158615163	0.999660365730703	-5.43633229417541
P05091	ALDH2	0.0648232062658206	3.34454568692038	1.65897311753165	0.148439080153861	0.999660365730703	-5.43657964224147
Q5BKT4	ALG10	-0.0433772367844561	3.29631081565915	-0.189874881421006	0.855698261893076	0.999660365730703	-5.43686236630711
Q13432	UNC119	-0.0354220985176397	3.31852270873725	-0.880914133385459	0.412418585775619	0.999660365730703	-5.43692209973025
Q9P2D6	FAM135A	-0.0165172653883488	3.28485926759621	-0.190168199816032	0.855478450865673	0.999660365730703	-5.43778064431096
Q9UJQ1-1	LAMP5	0.0625444921493649	3.31886625088434	0.618645301105946	0.558998285868871	0.999660365730703	-5.43801659728654
P50053-2	KHK	0.0379857614212413	3.31590134166745	0.911377735048607	0.397400972424192	0.999660365730703	-5.43821824250464
Q6ZVF9	GPRIN3	0.0240103618024629	3.31570958483178	0.333101536690742	0.750443998649425	0.999660365730703	-5.43823190366655
A6NHX0	GATSL2; CASTOR2; GATSL1	0.0440183640213659	3.32832360174754	0.789042338650953	0.460263931469966	0.999660365730703	-5.43846291684585
Q8WU58	FAM222B	0.0235625118826054	3.29960121590221	0.401800362309193	0.701819062213447	0.999660365730703	-5.43886215882326
P07205	PGK2	-0.0149492138918779	3.33573791458335	-0.0911230055503039	0.930375225782059	0.999660365730703	-5.43922169255465
Q9H4E7	DEF6	0.0354002596640146	3.29478661666174	0.382280725465272	0.715491019809685	0.999660365730703	-5.43927901964773
Q9HCJ0-2	TNRC6C	-0.0290255715715486	3.33237389955059	-1.46759514964006	0.19282756374471	0.999660365730703	-5.43945715195248
O95382-1	MAP3K6	-0.0132335658561671	3.30764683657568	-0.16647224105566	0.873280079331646	0.999660365730703	-5.43951333372896
P78549	NTHL1	0.0131332188415252	3.34935383297921	0.144738758500021	0.889679571493956	0.999660365730703	-5.43989699046537
Q96DC7-2	TMCO6	0.00208870612928303	3.29895585797736	0.0305561813384921	0.976619333120269	0.999660365730703	-5.43989872884065
Q13002	GRIK2	-4.09199939804696e-05	3.30304674936316	-0.000443787242125378	0.999660365730703	0.999660365730703	-5.44036059279746
Q9H2V7	SPNS1	-0.00173843835133419	3.28572015113506	-0.0262239450833873	0.979933269168551	0.999660365730703	-5.4403957438211
Q9BRB3-1	PIGQ	0.00608303904290167	3.30900928890265	0.0970579619324404	0.925856554358565	0.999660365730703	-5.44047473662188
Q8WY41	NANOS1	0.0342374106857342	3.23230687335727	0.181277487024809	0.862147321046573	0.999660365730703	-5.44053507065773
Q96BU1-1	S100PBP	-0.0347759481129763	3.33192873037452	-0.654014522475768	0.537464066686986	0.999660365730703	-5.44063853883325
Q8N3I7-1	BBS5	0.0183600186629758	3.28817190050022	0.156043439900115	0.881141312682023	0.999660365730703	-5.44100680217922
Q9NQ50	MRPL40	0.0516078359490751	3.33360550240078	1.1310681789227	0.301404790274766	0.999660365730703	-5.44157567157538
Q9NS37	CREBZF	0.00611713687339442	3.31068509942633	0.0838673074365803	0.935903317884863	0.999660365730703	-5.44177953033507
Q8IYN2	TCEAL8	0.0330319519739189	3.24396165824211	0.563156895932937	0.593830422011169	0.999660365730703	-5.44242614792785
Q5XUX0-1	FBXO31	-0.0492974855181032	3.32056744841974	-0.245137365513481	0.814558555014596	0.999660365730703	-5.44246939728669
Q9NPC7-1	MYNN	-0.057143491445907	3.35176455241614	-0.958537398445165	0.374982962313552	0.999660365730703	-5.44252905498105
Q9NYP3-1	DONSON	-0.03345856269432	3.34422792089466	-0.778600576297416	0.465944056061455	0.999660365730703	-5.44274913739119
A0AVK6	E2F8	-0.0535742557882803	3.33022070453423	-0.677006710521745	0.523752147002659	0.999660365730703	-5.44290501740121
Q9UN37	VPS4A	0.0376499823332523	3.32250375625799	1.47689686197557	0.190408711137928	0.999660365730703	-5.44330557748946
Q15048	LRRC14	-0.0707466898901396	3.31404754478333	-0.926975971407111	0.389874686136049	0.999660365730703	-5.44340271660423
Q92871	PMM1	0.0444163006410766	3.30773232782931	1.00831957932517	0.352405189151835	0.999660365730703	-5.44368644328705
Q8TF50	ZNF526	0.0363992839921448	3.29656516816254	0.354154061366554	0.735395610355191	0.999660365730703	-5.44405225858398
Q12974	PTP4A2	-0.143748592677334	3.19454166407479	-0.676576895009062	0.524006381431745	0.999660365730703	-5.44409948069055
P18440	NAT1	0.0112538247984041	3.32047309033003	0.154245825649472	0.882497885945179	0.999660365730703	-5.444389693539
Q9H6K4	OPA3	0.0448916788711167	3.28593544746736	0.257479961079748	0.805452858406798	0.999660365730703	-5.44489217477977
Q6PIU2	NCEH1	-0.0622794705315009	3.30937798234346	-0.934731903585064	0.386173433900979	0.999660365730703	-5.44521418172636
O43301	HSPA12A	0.030664689979421	3.32162735146977	1.49266178206867	0.186373517950551	0.999660365730703	-5.44534136176875
Q9Y259-1	CHKB	0.0386525453748767	3.31375786877552	0.739558666140535	0.487616590146264	0.999660365730703	-5.44538245802093
Q69YH5-1	CDCA2	-0.0446128538227076	3.32656925238328	-1.1604115279232	0.290170811681791	0.999660365730703	-5.44545551869532
P06276	BCHE	-0.049805969468136	3.3098589886218	-0.565071129049744	0.592607968922776	0.999660365730703	-5.4456135421057
Q8NHQ1-1	CEP70	-0.038178856204148	3.34874395629422	-0.785850399819058	0.46199506374615	0.999660365730703	-5.44564825829503
Q9H4P4	RNF41	0.0073065815769796	3.33934210199889	0.095997502891478	0.926663734071552	0.999660365730703	-5.4457321412893
P0C7T5	ATXN1L	-0.0365521431963619	3.30482973716211	-0.860579336344221	0.42267794527501	0.999660365730703	-5.4457798756711
Q9P246-2	STIM2	-0.0983331517071619	3.31798917746609	-1.00376477184721	0.354424867231563	0.999660365730703	-5.44578591296167
Q8TDD1-2	DDX54	0.0446322842354482	3.31463093240191	1.6610270878154	0.148020258406735	0.999660365730703	-5.44586810286144
O76083-1	PDE9A	-0.00673695675243973	3.3018083298922	-0.104011155443098	0.920566503801299	0.999660365730703	-5.44666738108089
Q96KC2	ARL5B	0.0439067107963477	3.29183838947715	0.607528463180077	0.565875377119503	0.999660365730703	-5.44731507245867
Q9P2J9	PDP2	0.0591058586611742	3.34351080890079	0.755052454031416	0.478934033600642	0.999660365730703	-5.44743378104932
Q5EBL8-2	PDZD11	0.0397614745432336	3.32066131162535	0.66518502218452	0.530773802911915	0.999660365730703	-5.44753839852596
O76080	ZFAND5	-0.0370769878084291	3.33239810172456	-1.38057299317724	0.216870987608032	0.999660365730703	-5.44815343629454
Q9NS93	TM7SF3	0.0265838288535	3.2879793705986	0.205441715764483	0.844052716935748	0.999660365730703	-5.44831368584108
P49281-3	SLC11A2	-0.0847740675295639	3.37485190258445	-0.324971327252854	0.756288345570283	0.999660365730703	-5.44834579654921
Q92186	ST8SIA2	0.0182238833515615	3.29179054127326	0.227852499775686	0.827363677159419	0.999660365730703	-5.44881209757623
O60909-3	B4GALT2	0.0309749554046831	3.32487711808695	0.399280016629955	0.703577637520801	0.999660365730703	-5.44888212170752
Q9Y242	TCF19	-0.0172501523502655	3.31210422147517	-0.27492452310953	0.792640425084525	0.999660365730703	-5.44914475249181
P63244	GNB2L1; RACK1	-0.0370559711727009	3.3131518206298	-2.18055404154208	0.0722309368862866	0.999660365730703	-5.44962685110323
Q86SX6	GLRX5	0.0872514385123791	3.29835022904658	1.09851993222943	0.314292055439434	0.999660365730703	-5.44964630504185
Q9BVN2	RUSC1	0.0237482954602406	3.30882121279812	0.393202449403252	0.707826532950257	0.999660365730703	-5.44994928490859
Q8N2G8-1	GHDC	-0.066614884340524	3.30070861931945	-1.1246793095081	0.303898837534593	0.999660365730703	-5.45018489625561
Q9Y561	LRP12	-0.0309788400727329	3.31060301475141	-0.428651254608484	0.6832113144983	0.999660365730703	-5.45031774169087
Q96K31-1	C8orf76; ZHX1-C8ORF76	0.0116585201843906	3.33185713827798	0.163460913006648	0.875548434314932	0.999660365730703	-5.45068707194566
Q92623	TTC9	0.00505014965937289	3.30317754306882	0.0648469075723863	0.950412660201663	0.999660365730703	-5.45069147116645
Q02246	CNTN2	-0.0349527371381599	3.29886575160521	-0.41116986502363	0.695299294584227	0.999660365730703	-5.45089491503446
Q8NC54	C5orf15	0.0682893465061738	3.2955131473555	0.525353352103113	0.618268129893292	0.999660365730703	-5.45106133453689
Q9H477	RBKS	0.028032411083425	3.32906361464009	0.362875920535176	0.729198277942737	0.999660365730703	-5.45112717584746
Q8TDG4	HELQ	-0.013223285380399	3.33075419747052	-0.222309037911706	0.831483018330658	0.999660365730703	-5.45139850218786
P62699	YPEL5	0.0340260868103083	3.29984813260436	0.589531486222701	0.577117115549355	0.999660365730703	-5.45147880487072
Q16842	ST3GAL2	-0.0237659936628934	3.32922616460771	-0.211703862465275	0.839379989624744	0.999660365730703	-5.45174787740928
P83369	LSM11	-0.0221808596780082	3.33821476805251	-0.385539561847548	0.713200218125321	0.999660365730703	-5.45233388128232
Q9BSR8	YIPF4	0.0609649328410466	3.27628899005468	0.680645577410798	0.52160298496198	0.999660365730703	-5.45285337224847
O95886	DLGAP3	-0.0129568767800719	3.31732940207278	-0.221487959650834	0.832093664236173	0.999660365730703	-5.45327108483388
Q8IVU1	IGDCC3	-0.005842499420444	3.31212071491453	-0.0846337347490365	0.935319188272257	0.999660365730703	-5.45365822832463
Q9Y6K0	CEPT1	-0.0369457761573358	3.33915537352626	-0.285478954458558	0.784922603776299	0.999660365730703	-5.45392443867798
Q9Y216	MTMR7	0.00299807928212613	3.3230114814197	0.0478470582983989	0.963398528742836	0.999660365730703	-5.45413391474573
O43760-2	SYNGR2	0.0378935958914836	3.30718600903272	0.314308806718969	0.763979858401888	0.999660365730703	-5.45481095395834
Q15011-1	HERPUD1	-0.0294511243112167	3.28471958942999	-0.293815728018187	0.778845279656017	0.999660365730703	-5.45511452105879
Q8NC69	KCTD6	-0.0162794793539491	3.29086216789813	-0.235698223177423	0.821543845241248	0.999660365730703	-5.45563817032934
Q6ICC9	LDOC1L; RTL6	-0.0248976115445875	3.31549778305168	-0.50249395281086	0.633312535713746	0.999660365730703	-5.45611604078436
P60520	GABARAPL2	0.0418551960054144	3.33191228030006	1.25575420088608	0.256112288945027	0.999660365730703	-5.45796999653018
Q8NE00	TMEM104	0.0558589675107278	3.26222680657665	0.48335631715956	0.646057595064735	0.999660365730703	-5.45810485937919
O60678	PRMT3	-0.030802403530871	3.32048435627363	-1.41303122384715	0.207598557199061	0.999660365730703	-5.45849081888874
O75815-1	BCAR3	-0.0425998199618088	3.31512915354822	-1.2802987686965	0.247930539489477	0.999660365730703	-5.45913994190478
Q6UXK2	ISLR2	-0.0638130006315268	3.30768589524909	-0.81342449126325	0.447192467398954	0.999660365730703	-5.4592222805565
Q92843	BCL2L2	0.00669981101867552	3.31567250495642	0.110297346424832	0.915787742419274	0.999660365730703	-5.45951720126599
Q9UJ04	TSPYL4	0.0281224668189106	3.33315781727245	0.563006222374852	0.593926706115655	0.999660365730703	-5.45962749501913
Q7Z7L8	C11orf96	-0.023777928101	3.30372438159959	-0.389012844724458	0.710762278407102	0.999660365730703	-5.45975591387476
O43567	RNF13	0.0229573171707947	3.32047412083756	0.295472250427462	0.777639735249805	0.999660365730703	-5.45997243032327
Q99683	MAP3K5	-0.0242586707423786	3.27089075113123	-0.264083638415527	0.800594628016073	0.999660365730703	-5.46015507542705
O94910	LPHN1; ADGRL1	-0.0297165779443174	3.31466369307883	-0.576749824195299	0.585181631174672	0.999660365730703	-5.46023428415837
Q86V20-2	FAM35A	-0.0147689709857727	3.29893624655493	-0.213392855816941	0.838120906097188	0.999660365730703	-5.46058251982039
P17535	JUND	0.0219399573579909	3.30485935666071	0.416599627373583	0.691533986397151	0.999660365730703	-5.46073352070839
Q09327	MGAT3	-0.00946108903393546	3.32474235717152	-0.137696128941487	0.895007068347038	0.999660365730703	-5.46092499447903
Q8TBP0	TBC1D16	0.0588040984430963	3.28930748174235	0.734846542656964	0.490278471276533	0.999660365730703	-5.46104066260961
Q5TB80	KIAA1009; CEP162	-0.0370544377094265	3.3408624981923	-1.42621568367089	0.203936859472328	0.999660365730703	-5.46114059915063
Q01974	ROR2	-0.027629876112902	3.28272067148797	-0.300713447675876	0.773829908656146	0.999660365730703	-5.46117824501249
Q9BVK2-1	ALG8	-0.128125902994837	3.29912631010741	-0.642736901033449	0.544272718414137	0.999660365730703	-5.46149042340177
Q9UJF2-2	RASAL2	0.0241026903898903	3.29783016524695	0.36118155318136	0.730400476830045	0.999660365730703	-5.46218975392983
Q8TCX1-2	DYNC2LI1	0.0673402539931063	3.27616063211357	1.08515541235201	0.319715124416059	0.999660365730703	-5.46226476816273
O15431	SLC31A1	0.0438727164920835	3.29830228435357	0.249002297127651	0.811703719119156	0.999660365730703	-5.46230719015424
Q6PCT2-1	FBXL19	0.0394760220321668	3.31280733031836	0.766434652765065	0.472624084014979	0.999660365730703	-5.46292975813546
Q9NRJ4-1	TULP4	-0.0299701943776144	3.31944710229748	-0.652612909111093	0.53830730679887	0.999660365730703	-5.46303642862657
Q4G176	ACSF3	0.0326106415711338	3.34337632643453	0.532725368827539	0.613458852419964	0.999660365730703	-5.4631073124801
Q9Y653	GPR56; ADGRG1	0.0385784046540766	3.31688978837049	0.665723516258125	0.530452643584288	0.999660365730703	-5.46364699483043
Q9C0D7-2	ZC3H12C	0.0211815645106721	3.2975426606287	0.296583081631604	0.776831700983489	0.999660365730703	-5.4648807461414
Q9NX20	MRPL16	0.0860013388746801	3.30928389236985	0.686300416610091	0.518274596736297	0.999660365730703	-5.46500804486973
P51692	STAT5B	-0.0348115947391256	3.32365737747313	-0.991200503016512	0.360044035777818	0.999660365730703	-5.46511835617263
Q86YD1-1	PTOV1	-0.0459164712736178	3.3269955255136	-0.874347404475443	0.415711075025154	0.999660365730703	-5.46522001726457
Q8WUY9	DEPDC1B	0.0443916870169362	3.30514570726695	0.997667420101584	0.357143009019368	0.999660365730703	-5.46565394183125
Q7Z2K6	ERMP1	-0.104102403141289	3.31482259552044	-0.693202381314741	0.514231067652011	0.999660365730703	-5.46589764888725
Q99618	CDCA3	0.0423295276400346	3.30646820856588	0.959563178144401	0.374506512710204	0.999660365730703	-5.46595302242263
O60239	SH3BP5	0.0401800396755037	3.31460317330889	0.746270486388568	0.483842181081496	0.999660365730703	-5.4661330591948
Q6NXT6	TAPT1	-0.0724563129745596	3.29230522673757	-0.563722335591868	0.593469172960028	0.999660365730703	-5.46627323573795
Q96LJ7	DHRS1	-0.0317662413937581	3.31388259121995	-0.626385134871403	0.554240774623488	0.999660365730703	-5.4662802569244
P51606-1	RENBP	0.0368848247379465	3.30377109605207	0.772936531856404	0.469045761950226	0.999660365730703	-5.46642405990486
Q9BZC1-1	CELF4	0.0250060172131947	3.32115322819947	0.342786863100211	0.743505438323281	0.999660365730703	-5.46704636285155
Q9H9V9	JMJD4	0.0128431489794215	3.32013868152957	0.190439432817761	0.855275203159118	0.999660365730703	-5.46720444267566
Q13163-1	MAP2K5	-0.0387613484063034	3.31921554880387	-0.707006031515784	0.506206788068345	0.999660365730703	-5.46793475115995
Q03181	PPARD	0.0387009935175087	3.31263070645083	0.60035860158385	0.570338011118375	0.999660365730703	-5.46796665101563
O75390	CS	0.0746133711855972	3.32479488452166	1.6647990663947	0.147254086043495	0.999660365730703	-5.46823607958883
Q12955	ANK3	-0.0424314635845487	3.31308611331747	-1.0255191453575	0.344861758715169	0.999660365730703	-5.46909440894024
Q08397	LOXL1	-0.0316351713074486	3.29385846206815	-0.529092757582856	0.615826042310754	0.999660365730703	-5.4691149573823
Q9H160	ING2	-0.0419308832914128	3.3744959896866	-0.413932125517439	0.693382584848914	0.999660365730703	-5.46914073021736
Q96BQ5	CCDC127	-0.00801315119934256	3.25537407883178	-0.098785429085889	0.924541882127183	0.999660365730703	-5.46915314102084
Q9Y2U9-1	KLHDC2	-0.0338968248792742	3.3057385318883	-0.904185037153218	0.400908712506049	0.999660365730703	-5.46996020335591
O43325	LYRM1	0.000417721549447961	3.40829015238539	0.00281835930543081	0.997843088151991	0.999660365730703	-5.47030390245259
P07602-3	PSAP	0.061524068358305	3.21839483111234	1.56723446208805	0.168348691083219	0.999660365730703	-5.47031373232736
Q68D10-1	SPTY2D1	-0.0333339070157915	3.3458956366729	-0.464006897657842	0.659079042670474	0.999660365730703	-5.47073569508267
Q96K21	ZFYVE19	-0.0369982776766266	3.36584076844658	-0.329638880711992	0.752930912943797	0.999660365730703	-5.47118424907312
Q9P2F5-1	STOX2	-0.018743771061447	3.34144747855209	-0.330983006631152	0.751965159875117	0.999660365730703	-5.47132706057371
P02649	APOE	-0.00349876001730221	3.31523772880603	-0.0258346009031757	0.980231119876752	0.999660365730703	-5.47145691390706
Q9BRA0-2	LSMD1; NAA38	0.0434166030845805	3.32002202362006	0.599116258259889	0.571113423456379	0.999660365730703	-5.47168968075587
Q5VT66-2	MARC1	-0.0607504566141453	3.31200240037766	-0.572762735711383	0.587710805317464	0.999660365730703	-5.47169772915527
P0C860	MSL3P1	-0.0448956769667864	3.29680738489331	-0.279306067403889	0.789433275110127	0.999660365730703	-5.47178814529404
Q96QD8	SLC38A2	0.0211767043912689	3.31892012226274	0.147645285023459	0.887482712047592	0.999660365730703	-5.4718232526441
P17017	ZNF14	-0.0979298377817812	3.3090522439138	-0.74695608934298	0.48345776322593	0.999660365730703	-5.47190070784889
Q9Y3B1	SLMO2; PRELID3B	-0.0541734630087229	3.33265737732818	-0.787174419662757	0.461276429578545	0.999660365730703	-5.47212390982958
P61916	NPC2	0.0265520496289516	3.29967759447318	0.403731645577979	0.700472874842329	0.999660365730703	-5.47249502105656
O15162	PLSCR1	0.0242360304269207	3.28688643796383	0.122995922927049	0.906146281255861	0.999660365730703	-5.4731151089751
Q9NUP1	BLOC1S4	-0.0390464080129381	3.33727353903512	-0.888798319427972	0.408491455735248	0.999660365730703	-5.47321566725246
Q9BQE3	TUBA1C	-0.0793331737240492	3.30718494776921	-1.28073573975225	0.247786993947513	0.999660365730703	-5.47328306462271
Q15628	TRADD	0.0401110462126625	3.30321415991089	0.710358527806688	0.50427057597614	0.999660365730703	-5.47331840856942
Q9Y548	YIPF1	-0.0154380351755037	3.31321429785735	-0.153867569984242	0.882783393231519	0.999660365730703	-5.47350726669803
Q8N7B6	PACRGL	-0.00513120385665525	3.31979671749285	-0.0590955978737552	0.954804327770741	0.999660365730703	-5.47377690908239
Q49AM3-1	TTC31	-0.029073498635365	3.31812288957885	-0.614036086781117	0.561843386173719	0.999660365730703	-5.47430452461714
Q6ZVM7	TOM1L2	0.033737245659183	3.30977436943718	0.968998812570726	0.370146116996947	0.999660365730703	-5.47455310344357
[truncated: 6,469 more rows]
