# Supplementary material for: Thalidomide promotes degradation of SALL4, a transcription factor implicated in Duane Radial Ray syndrome
Source: eLife journal article supplement (doi:10.7554/elife.38430), 2018-08-01
Supplement: supp [file elife-38430-supp-v1.zip › elife_poa_e38430_Figure_1_source_data_5.csv]

	ID	logFC	AveExpr	t	P.Value	adj.P.Val	B
Q9UJQ4	SALL4	-0.759033119898606	3.67454983958192	-15.0580635420273	4.51696495701611e-06	0.0191248296280062	3.35315287565769
P48729-2	CSNK1A1	-0.477466683479244	3.22769628316735	-10.513354799693	3.79331359460288e-05	0.0535362991984953	2.73048563561552
P51157-1	RAB28	-0.48274968107575	3.32533139991003	-10.7681646974601	3.29734881658722e-05	0.0535362991984953	1.77667972574324
Q17R98	ZNF827	-0.77860391476481	3.38220817794855	-13.6648309558668	8.06569845966194e-06	0.0227667781854724	1.23351726598653
Q14204	DYNC1H1	0.0404249810960958	3.31959390167907	8.29176881385583	0.000149278465052977	0.180584291724087	0.912923544704447
Q15811	ITSN1	0.22384601840198	3.28663753841445	6.83362379212283	0.000440876725404675	0.435268171463163	0.569656887985658
Q96JP5-1	ZFP91	-0.154201538711229	3.44901219370398	-6.72575016878085	0.000481147161614062	0.435268171463163	0.507641413745169
O60925	PFDN1	0.179159917427456	3.31058976721066	6.64509847911988	0.000514015318213466	0.435268171463163	0.435033906628941
P12259	F5	-0.339094994555861	3.36924304995663	-6.07875582396979	0.000832771036562742	0.587658761467775	-0.0165311142402542
Q9BU19-5	ZNF692	-1.76973935409119	3.54480682638764	-27.6384242192219	1.14968538516805e-07	0.000973553584160307	-0.20985380993269
Q9H116	GZF1	-0.246323599385598	3.33092268802932	-5.77242441668216	0.00109675541651539	0.714409605157873	-0.37166193258103
P62888	RPL30	-0.12066125537351	3.32529392276416	-5.47125920205874	0.00145307097620961	0.860536067679288	-0.703309466458361
P17096-1	HMGA1	-0.179926577075947	3.3194506707661	-5.32359957396151	0.00167471762182011	0.860536067679288	-0.714688930288852
P02751	FN1	-0.39560190523854	3.36350406881776	-5.2305199571051	0.00183408441494106	0.862834823651159	-0.78933353535349
Q03252	LMNB2	-0.0623524742819589	3.32415078275054	-5.36404995874444	0.0016104011577585	0.860536067679288	-0.906209681284822
Q7Z7F0-1	KIAA0907; KHDC4	-0.10465920486969	3.31009061431283	-4.96080619773391	0.00240199243052665	0.999880997596556	-1.08956297296249
Q8WXE9-3	STON2	0.563667457825968	3.22551089563642	4.84518358888874	0.00270448682176368	0.999880997596556	-1.18869313637785
Q96BD0	SLCO4A1	0.633106987323439	3.27279942387904	6.44562907844224	0.000606942263522624	0.467235189773598	-1.21913533843558
P51854	TKTL1	0.156767501982823	3.30945505800926	4.61476549365099	0.00344456208748192	0.999880997596556	-1.40689999365158
Q6UX04	CWC27	-0.129382680095203	3.32265329012867	-4.50241841208614	0.00388629777456328	0.999880997596556	-1.45077704279235
Q96A37-1	RNF166	-1.05656436032201	3.43703861557712	-12.3412995970808	1.47701078507315e-05	0.0312683183199986	-1.65717175286313
Q13418	ILK	0.131299462876635	3.32929288537051	4.33475907407097	0.00466889066859338	0.999880997596556	-1.67391714465303
Q9C0F1-1	CEP44	0.114383451793315	3.32223848738121	4.28297674167076	0.00494521188417826	0.999880997596556	-1.67401878604281
Q8WUW1-2	BRK1	0.246765327011535	3.30589924709391	4.22068521449065	0.00530216352552342	0.999880997596556	-1.72640813452388
Q9NPB8	GPCPD1	0.109678426890421	3.32525200559127	4.34726620301754	0.00460477215575512	0.999880997596556	-1.75322516064223
Q9NZM3	ITSN2	0.101358385925524	3.3007937519053	4.43423659999268	0.0041852701483714	0.999880997596556	-1.76431687895356
Q6IN85	SMEK1; PPP4R3A	0.0742677260795204	3.31179132211907	4.42816025002013	0.00421314375692118	0.999880997596556	-1.77458448525234
Q8IV36	HID1	0.132170119447065	3.31682458323931	4.15311846503623	0.00572228334249199	0.999880997596556	-1.78754041572118
Q9H814	PHAX	-0.0948569521534676	3.32258741351395	-4.24705892238939	0.00514762817477575	0.999880997596556	-1.83998531463429
Q05655	PRKCD	0.118558787417705	3.31931901229812	4.14349953699786	0.00578506246371091	0.999880997596556	-1.85685084260808
Q9H9B1	EHMT1	-0.0590796473596112	3.31867125322315	-4.45469549181255	0.00409293104197076	0.999880997596556	-1.95702077369892
P49327	FASN	0.032183011668248	3.32413398342151	5.2916527913538	0.0017275759507024	0.860536067679288	-1.96006036600372
Q10471	GALNT2	0.0850263887949362	3.31681652336553	4.15575509955126	0.00570520816889666	0.999880997596556	-2.09465474873086
Q93050-3	ATP6V0A1	0.0929538019809547	3.31732800022904	4.07911513375957	0.00622561935043673	0.999880997596556	-2.13534718199117
O95782	AP2A1	0.10802676057273	3.30926141973981	4.0047802272869	0.00678144511054942	0.999880997596556	-2.20867089402716
A1L170-2	C1orf226	0.141313159429781	3.3016788613851	3.7316333893979	0.00935280307825826	0.999880997596556	-2.22566136248213
Q9NRX4	PHPT1	-0.0855780261560723	3.32268884924678	-3.87902630982072	0.00785208006891054	0.999880997596556	-2.2470401407562
O43805	SSNA1	0.304189768134781	3.29625837442978	3.63972034711048	0.0104482235206288	0.999880997596556	-2.34402246868253
Q6FI81-1	CIAPIN1	0.0616159636713471	3.31801688635388	4.00772841637094	0.00675837543951921	0.999880997596556	-2.39634529379726
Q14061	COX17	0.441417039707964	3.27474493922886	3.55859336551791	0.0115336595660861	0.999880997596556	-2.41510634879443
Q02241-1	KIF23	-0.127197973504999	3.3325024922366	-3.80657633318859	0.00855341899038077	0.999880997596556	-2.45058045165881
Q9NRW1	RAB6B	0.106655386921741	3.31780122896156	3.5295518421254	0.0119519770612978	0.999880997596556	-2.49109034476171
Q9NY33	DPP3	0.064930469562229	3.32544262791209	3.83803188078703	0.00824072076713955	0.999880997596556	-2.49756849171836
Q68DI1	ZNF776	-0.114329720963764	3.32258109851459	-3.43161490973066	0.0134905938747353	0.999880997596556	-2.5815750700447
Q9H0S4	DDX47	0.103804621760414	3.3170414712133	3.75051905155891	0.00914383330711589	0.999880997596556	-2.58453565712465
Q9H582-1	ZNF644	-0.157880675376714	3.31307361505344	-3.70727541897239	0.00963017159398697	0.999880997596556	-2.645385655872
P78364	PHC1	-0.128927556694009	3.32501345846991	-3.4632397205402	0.012971175451338	0.999880997596556	-2.66266416190901
Q14872	MTF1	-0.259078971477465	3.31683307419893	-3.48202276295976	0.0126731058446282	0.999880997596556	-2.66983251170621
Q8N653	LZTR1	0.127145284874485	3.32025056598355	3.30977402525238	0.0157159811645371	0.999880997596556	-2.67784316902273
Q9Y5L0-1	TNPO3	0.0600676440987655	3.33139609651466	3.77239353286041	0.00890823203415689	0.999880997596556	-2.70259354202811
Q15041	ARL6IP1	0.197456989273431	3.37218665274477	3.29244502347324	0.016063915572562	0.999880997596556	-2.70375714803337
P52434	POLR2H	0.139342311108463	3.33616042903807	3.46777567989338	0.0128984944708234	0.999880997596556	-2.71179211715446
Q96CN7	ISOC1	0.0903788952506734	3.32326028631689	3.36946808061707	0.0145791461461659	0.999880997596556	-2.72073855626426
P07203	GPX1	0.073825722177007	3.31161411711861	3.41432082766186	0.0137842701812259	0.999880997596556	-2.72218553611682
Q9H2P0	ADNP	-0.06742727718359	3.31677978043841	-3.95717586087548	0.00716635621066776	0.999880997596556	-2.7609176257479
Q96SW2-1	CRBN	0.191773329719493	3.2975790215291	3.24817176912381	0.0169916790406862	0.999880997596556	-2.76912779648147
P00374	DHFR; DHFRP1	0.081230811326351	3.33508712691112	3.51489817773153	0.0121693719609308	0.999880997596556	-2.77222325571748
P35606	COPB2	0.0474698686187691	3.32194130471826	3.82704435641203	0.00834848209837241	0.999880997596556	-2.78022740235925
O96011-1	LOC101060567; PEX11B	0.180961898953867	3.34459916359374	3.18908947382586	0.0183220523602942	0.999880997596556	-2.8092424528552
P36871-1	PGM1	0.0494685785779838	3.32422605505426	3.68950066935253	0.00983832023949893	0.999880997596556	-2.82019581062074
P58004	SESN2	0.137489709566437	3.31825993208179	3.15659758578079	0.0191017383830719	0.999880997596556	-2.85735814555705
Q9H270	VPS11	0.0625676964135807	3.34297251371233	3.42420397249387	0.0136155916218985	0.999880997596556	-2.90269239962361
P23771-2	GATA3	-0.116109823261888	3.33232094485845	-3.13416770567835	0.0196610096694431	0.999880997596556	-2.94033285762582
Q2QGD7	ZXDC	-0.137383393868123	3.31057665160401	-3.11716710108588	0.0200967643945024	0.999880997596556	-2.95539611094596
Q49A26-2	GLYR1	-0.124448868976856	3.31143055298002	-3.09334746232191	0.0207250460242586	0.999880997596556	-2.992146317178
Q9P2W9	STX18	0.146619618070336	3.32546545023805	3.05765548485522	0.0217067307635667	0.999880997596556	-3.03793752983456
Q8NEB9	PIK3C3	0.0597058651507339	3.32741371316673	3.32259211595192	0.0154639229564734	0.999880997596556	-3.04506591969142
P04632	CAPNS1	0.102653899762148	3.31446752161624	3.08904582054788	0.0208407657184825	0.999880997596556	-3.06420532100681
Q9NWB7	IFT57	0.142375928337262	3.32835113780694	2.98307553953904	0.0239245457525752	0.999880997596556	-3.06890970223835
Q15437	SEC23B	0.0584060936965006	3.3254663615251	3.36983974561757	0.01457235652614	0.999880997596556	-3.0756371519106
Q4V328	GRIPAP1	0.0687213567943685	3.3182542765316	3.13404837845722	0.0196640322021433	0.999880997596556	-3.09862406317563
Q9ULI2-1	RIMKLB	0.184189400837475	3.32333456849039	2.95997297338249	0.0246603516059392	0.999880997596556	-3.10821059096738
Q13098-7	GPS1	0.0946884773247174	3.3533271814938	3.23796588152072	0.0172137481779165	0.999880997596556	-3.11149692067045
Q9NWV4	C1orf123	0.111728057359143	3.3258663581339	3.09365690574195	0.0207167485282378	0.999880997596556	-3.14032165409497
A3KN83-1	SBNO1	0.0689349149985936	3.31543231252891	3.25713114978678	0.016799308981648	0.999880997596556	-3.15442782218117
Q9UKL0	RCOR1	-0.0853900213593194	3.31164817979296	-3.00177236435686	0.0233464232711254	0.999880997596556	-3.16229215522542
O00232-1	PSMD12	0.0687173980227567	3.32549170833788	3.29653204173102	0.0159811032360311	0.999880997596556	-3.1667829552103
Q9H9G7	AGO3; EIF2C3	-0.0858390270112298	3.33140487576944	-2.94908660375388	0.0250155136089908	0.999880997596556	-3.17228266171041
Q9Y680-2	FKBP7	-0.0944149031759804	3.31959533033456	-2.96802675890984	0.0244011047384334	0.999880997596556	-3.21282843845767
P42892	ECE1	0.114464674656331	3.31213608442928	3.08231469588714	0.0210232510636813	0.999880997596556	-3.21443069591359
Q8NCA5	FAM98A	-0.0754637860392074	3.32273158350433	-3.28037594549688	0.016311213288344	0.999880997596556	-3.21696597992913
P49815	TSC2	0.0600309476156538	3.32174406114721	3.33869441979807	0.0151535338126819	0.999880997596556	-3.21930521647395
Q14145	KEAP1	0.0768235001041983	3.34238882623339	3.18133764207631	0.0185048681631619	0.999880997596556	-3.21938120997804
P55786	NPEPPS	0.0574812573371689	3.31304975440615	3.53687137027625	0.0118449925752153	0.999880997596556	-3.22473503531213
Q86U90	YRDC	0.164102418459019	3.33880522571141	2.82148116812329	0.0296152960873254	0.999880997596556	-3.25035712958355
O14519	CDK2AP1	-0.144706446828084	3.31613285651396	-2.83052696323996	0.0292609824804117	0.999880997596556	-3.2508781368502
Q96G21	IMP4	0.103960554818659	3.32032968770915	2.89981847421336	0.0266932674395056	0.999880997596556	-3.25313279894305
Q9UKA1	FBXL5	0.34379845998121	3.34332284182565	3.08717158366311	0.0208914042586325	0.999880997596556	-3.25791376259702
Q9H3C7	GGNBP2	0.186270389851231	3.34158517778459	2.78617653977629	0.0310427698058762	0.999880997596556	-3.26098659003461
P09382	LGALS1	0.113411886234915	3.31090765796337	2.99466363631225	0.0235644324535172	0.999880997596556	-3.27092858619744
Q5JVF3	PCID2	0.0947593329364622	3.31699052132376	3.18319151543705	0.0184609671758819	0.999880997596556	-3.27507541964993
Q9UI95	MAD2L2	0.121990921563495	3.32561399241232	2.77136875892194	0.031663268864814	0.999880997596556	-3.27662665888344
Q8N8E2-1	ZNF513	-0.131165889156953	3.29911653549748	-2.74801270067651	0.0326690864351814	0.999880997596556	-3.28582134217395
Q86YS3	RAB11FIP4	0.187991984738034	3.33250334268895	2.74113488127597	0.0329717431698863	0.999880997596556	-3.29013292878931
Q6IQ19-1	CCSAP	-0.190924213837352	3.31579171571055	-2.86411305286194	0.02798473326494	0.999880997596556	-3.29702078383612
Q9H4A4	RNPEP	0.0695307337094498	3.31639179347049	3.20471282788426	0.0179595486694045	0.999880997596556	-3.29729410282945
Q8NE01	CNNM3	0.18577210509155	3.31997796377921	2.79298468419613	0.0307618630538941	0.999880997596556	-3.30292189126856
O75052-3	NOS1AP	0.16391796656075	3.29296276156611	2.86823681244892	0.0278322022096086	0.999880997596556	-3.30511613178044
O00584	RNASET2	-0.0962329404326271	3.30716561902142	-2.83214639655295	0.0291980323800473	0.999880997596556	-3.32967289639672
Q8N336	ELMOD1	0.476945469593696	3.40306982884569	2.77537060572774	0.0314942792784457	0.999880997596556	-3.33432980521583
Q9BZG1	RAB34	0.226830684270599	3.31864475458382	2.72416448843081	0.0337314012412108	0.999880997596556	-3.35822585343207
Q9P287	BCCIP	0.0941295581811127	3.31881112347979	2.861984329499	0.0280638225557687	0.999880997596556	-3.36308562720878
P37837	TALDO1	0.077096019601288	3.31974519586257	3.35266807258235	0.0148897008736682	0.999880997596556	-3.3701061609814
Q6PCE3	PGM2L1	0.0798692483213524	3.32218335780234	3.07424312006634	0.0212443660024781	0.999880997596556	-3.37092844690696
P62244	RPS15A	0.100731639811595	3.34813221442992	3.10494343615557	0.0204165594690894	0.999880997596556	-3.37785038335036
P43378	PTPN9	0.0826272905448906	3.32605528899688	2.96213013911087	0.0245906233600432	0.999880997596556	-3.38211089001408
Q8IWB7	WDFY1	0.118709885984281	3.32525402605374	2.94290683738025	0.0252195776721934	0.999880997596556	-3.38287393682224
Q9BZQ6	EDEM3	0.0915882144105643	3.3218862664113	2.89224175039039	0.0269618601969187	0.999880997596556	-3.38599722811983
Q99538	LGMN	-0.0929300217136463	3.29307735936041	-2.69900508103107	0.0348921845915158	0.999880997596556	-3.38743599987042
O00422	SAP18	-0.0633616529215627	3.3233800699771	-3.02833625956693	0.0225508713757377	0.999880997596556	-3.38838316655684
Q96QK1	VPS35	0.0733020130012888	3.32730194256526	3.22599931453569	0.0174781701754552	0.999880997596556	-3.40107119524848
P59998-3	ARPC4	0.123515625225901	3.3346229049391	2.77607787812228	0.0314645131079985	0.999880997596556	-3.40428969521054
Q8TAM2-4	TTC8	0.194164963114212	3.31356981409383	2.63077261210263	0.0382595601681568	0.999880997596556	-3.40891501952779
Q96FX2-1	DPH3	0.180323199525182	3.34250208307419	2.6227947011745	0.0386752669190512	0.999880997596556	-3.41952816397599
P48556	PSMD8	0.0531170237815856	3.32557759067003	3.06269359173031	0.02156515515016	0.999880997596556	-3.42918701894125
Q93074-2	MED12	0.0549801851034266	3.31909181414202	3.12275478248467	0.0199523955570569	0.999880997596556	-3.43175109234229
O60885-1	BRD4	-0.0520310650877705	3.3139010553459	-3.11833064383052	0.020066608653625	0.999880997596556	-3.43550809967792
P23769-1	GATA2	-0.103897073763229	3.32819347176587	-2.77302106145823	0.0315933783306198	0.999880997596556	-3.43873281286392
O43813	LANCL1	0.0767511683499287	3.31696735266706	2.9557442953633	0.0247976594236426	0.999880997596556	-3.44074030247283
Q14914	PTGR1	0.0643286205488974	3.32720813941085	2.84768048323337	0.0286015264751418	0.999880997596556	-3.44202519817991
O75822	EIF3J	0.0991375914108436	3.35085949049139	2.79818446367523	0.030549151631486	0.999880997596556	-3.44214122223479
O75153	CLUH; KIAA0664	0.0630749525441654	3.3249815848863	3.23743515858716	0.0172253824651922	0.999880997596556	-3.44701815637008
Q5TB80	KIAA1009; CEP162	-0.0780393280535698	3.32037005302023	-2.89126275143604	0.026996777067389	0.999880997596556	-3.44752075553763
P40818	USP8	-0.118059818853582	3.31563422521085	-2.69059338047173	0.0352897124946413	0.999880997596556	-3.45061495662082
Q9NYZ3	GTSE1	-0.103328924124266	3.32099366964065	-2.82408432188222	0.0295128642990544	0.999880997596556	-3.46793084598932
A8MTY0	ZNF724P; ZNF724	-0.12958583958428	3.3350696338993	-2.60515311701517	0.0396116230877159	0.999880997596556	-3.47262385717992
Q13438-1	OS9	-0.131162147142497	3.31985122521669	-2.56925813488957	0.0415917381632173	0.999880997596556	-3.47759797050838
Q9UBP9	GULP1	0.0788346757765427	3.30461079164045	2.7313184736823	0.033408908888589	0.999880997596556	-3.48543605415547
Q9UHL0-1	DDX25	0.156050533858637	3.29271184931656	2.57896630919441	0.0410460702119319	0.999880997596556	-3.49870633516218
P33121	ACSL1	0.0618942535525901	3.31752780023801	3.01819805474925	0.0228509808336168	0.999880997596556	-3.49927561524704
P30520	ADSS	0.0674181438134506	3.33206853501368	3.02456445646478	0.0226620223731408	0.999880997596556	-3.4993713723123
Q9Y2K2	SIK3	-0.226076967120166	3.3076401656245	-2.61497722771434	0.0390872637881253	0.999880997596556	-3.51137715985028
O00115	DNASE2	0.138071053999177	3.30836467654573	2.53352635086123	0.0436670679730915	0.999880997596556	-3.51214252397453
Q9Y4R8	TELO2	0.0566172068073706	3.32325073189352	2.94915598043807	0.025013232834451	0.999880997596556	-3.51992406804127
Q7Z6Z7-2	HUWE1	0.0434577345562284	3.31677714550962	3.55036319669541	0.011650545580774	0.999880997596556	-3.52052152662149
Q9Y5J7	TIMM9	0.358534641971165	3.29443153864523	2.63477528156611	0.038052780760618	0.999880997596556	-3.52148039919363
Q9Y5V3-2	MAGED1	-0.0825934797674089	3.31021987403116	-2.79496974238302	0.0306804721485502	0.999880997596556	-3.53004112212964
Q9H1E3	NUCKS1	-0.132908738126648	3.31985109263456	-3.19429975053263	0.018200281548174	0.999880997596556	-3.53532116728326
Q9Y5R8	TRAPPC1	0.105961757702216	3.32494055711011	2.63852936427977	0.0378599212259967	0.999880997596556	-3.53547304867836
Q99575	POP1	0.068970372103417	3.32069996365697	3.08558804905985	0.0209342926088548	0.999880997596556	-3.5451384369581
P52209	PGD	0.0441216366844187	3.31674067466081	3.22477174076474	0.0175055451486413	0.999880997596556	-3.54819854299439
Q96BR6-1	ZNF669	-0.173571771349312	3.32570824382964	-2.49610628914706	0.0459579562961175	0.999880997596556	-3.55880714662553
P11387	TOP1	-0.106741457408144	3.3243003377352	-3.22577281218703	0.0174832176769741	0.999880997596556	-3.56687004397316
P21579	SYT1	0.0971383735838267	3.30936073179508	2.57630740033518	0.0411947627016106	0.999880997596556	-3.5686439521005
P50583	NUDT2	0.111637404991553	3.33509111095102	2.55729876735942	0.0422745012187071	0.999880997596556	-3.57566366233119
Q12967	RALGDS	0.178252181065753	3.35277181625758	2.46561131059313	0.0479183374828541	0.999880997596556	-3.58019640275704
Q8NHZ8	CDC26	0.180299967030602	3.30704624670629	2.53874521762604	0.0433572569721844	0.999880997596556	-3.58282717320513
Q9P2Y4	ZNF219	-0.142480326686053	3.32198622663948	-2.59464286743253	0.0401808664132219	0.999880997596556	-3.58369281654114
P49589-3	CARS	0.0708737013676373	3.32617517131633	2.71950800606497	0.0339430927622669	0.999880997596556	-3.585348532222
P11171-1	EPB41	-0.0624510304309836	3.30996796862011	-2.90648973422495	0.0264591567963769	0.999880997596556	-3.60389205527775
Q9C005	DPY30	0.595082815390052	3.16540843664939	2.43467206211821	0.0499972115060215	0.999880997596556	-3.61671528554004
P52789	HK2	0.0398447904141411	3.32645921645485	3.16076875343915	0.0189996547506727	0.999880997596556	-3.61676242602442
Q9NPG3-1	UBN1	-0.0677457506346565	3.31509847999484	-2.66418724330972	0.0365692736363277	0.999880997596556	-3.62417370047155
Q09161	NCBP1	0.0643338899643614	3.31433671967541	2.99921685827793	0.023424542968872	0.999880997596556	-3.62680505965283
P30305-1	CDC25B	0.119362900443501	3.32082803243302	2.52235763200691	0.0443379550726193	0.999880997596556	-3.62759966092306
P56270-2	MAZ	-0.170096654081036	3.32253418460663	-2.66143821196511	0.0367052921567238	0.999880997596556	-3.63425981538284
Q13057-2	COASY	0.180014149669076	3.33119333144069	2.46511656046078	0.0479508575346943	0.999880997596556	-3.6345172926208
Q15121-2	PEA15	0.449199410022534	3.29512992242606	2.64163584543138	0.0377011157651161	0.999880997596556	-3.63623231340635
O95208-1	EPN2	0.104249108812577	3.31324200711469	2.54518846077676	0.0429779585403253	0.999880997596556	-3.6488108769884
Q96PN7	TRERF1	-0.0778134917978991	3.31187034852278	-2.58232011692307	0.0408593265859687	0.999880997596556	-3.64926825112277
Q86YV9	HPS6	0.0984758709243324	3.30844367115528	2.62922843015669	0.0383396516514011	0.999880997596556	-3.65095125626339
Q13907	IDI1	0.118700255608077	3.34284413818237	2.71898332409634	0.0339670343730602	0.999880997596556	-3.65199452721713
Q96H35	RBM18	-0.0889480838334304	3.309278027259	-2.45593908593594	0.0485583142530677	0.999880997596556	-3.65409128377786
Q8IWY8-1	ZSCAN29	-0.110840727285863	3.32450531879834	-2.51118216230473	0.0450201301993187	0.999880997596556	-3.65486923770794
O75164-1	KDM4A	0.0741998137041957	3.31684981860652	2.58108084495377	0.0409282256649159	0.999880997596556	-3.66982799257679
Q13492-1	PICALM	0.0723058403684022	3.30707128511931	2.73530935556376	0.0332304363097764	0.999880997596556	-3.67583465425706
P28331-2	NDUFS1	-0.0619368649620261	3.30346436324453	-3.03098397799919	0.0224731985543962	0.999880997596556	-3.67705868407438
Q7Z3U7-1	MON2	0.0938269773987331	3.31156966605227	2.82222769946387	0.0295858818086795	0.999880997596556	-3.67828890696041
P25490	YY1	-0.128437480850161	3.32852930620396	-2.68399100549945	0.0356051115150069	0.999880997596556	-3.70422171869812
O00592	PODXL	0.121257952308349	3.32301717559062	2.40948777697688	0.0517591019726543	0.999880997596556	-3.70948051664534
Q9H2C0	GAN	0.105723641242128	3.3386536979443	2.67459650773811	0.0360590741893848	0.999880997596556	-3.71742808041659
Q15532	SS18	0.140690124752967	3.31134957503782	2.36924594485506	0.0547103689089028	0.999880997596556	-3.72719196494463
P18859-2	ATP5J	1.26658411865357	2.95374415844273	2.34948364331591	0.0562234589559321	0.999880997596556	-3.7302717565985
O95926	SYF2	0.192643965845054	3.29970761942624	2.63345505246567	0.0381208528900041	0.999880997596556	-3.73250928411262
Q9NQZ8	ZNF71	-0.230572076376457	3.34212943071147	-2.33381451623428	0.0574540915808387	0.999880997596556	-3.74068044444506
P10073	ZSCAN22	-0.175673392481204	3.33857254438204	-2.37964327797273	0.0539314006669863	0.999880997596556	-3.74202248787628
Q9H7H0-3	METTL17	0.10100210395667	3.32006937699685	2.37825573028276	0.0540346833402071	0.999880997596556	-3.74794765078585
P49757	NUMB	0.178234573274484	3.30968867784353	2.69679889289444	0.0349959830615629	0.999880997596556	-3.74919487284428
Q9P1U1-1	ACTR3B	0.121449297678745	3.32708743263958	2.36859761175711	0.0547593289695826	0.999880997596556	-3.75343285393441
Q9Y255	PRELID1	0.0953137152081376	3.3349852437801	2.45476237641803	0.0486367827196917	0.999880997596556	-3.75684624127301
Q6ZMS4	ZNF852	-0.16272338113422	3.31674444567351	-2.28734456655589	0.0612710201031584	0.999880997596556	-3.76500539161668
Q9NRX1	PNO1	0.0915147641143185	3.3351043196539	2.36829304925378	0.0547823443300614	0.999880997596556	-3.77377902682432
Q68CQ4	DIEXF	0.052920732050359	3.31543352063531	2.9634049959356	0.0245495149526187	0.999880997596556	-3.77380605642622
O43715	TRIAP1	0.584091800774749	3.33079818679354	2.50094157110396	0.0456549475115805	0.999880997596556	-3.7758467008683
Q9P000-1	COMMD9	0.117396687833651	3.32729986487607	2.56799990192321	0.0416630192442916	0.999880997596556	-3.78114894743687
Q9H5X1-1	FAM96A	0.117728531188684	3.32383826175653	2.27215403014771	0.0625749842057812	0.999880997596556	-3.78127679959542
Q96JM7	L3MBTL3	-0.091514129869652	3.30827987663048	-2.32872642166332	0.057859701942383	0.999880997596556	-3.78326815952227
Q2NL82	TSR1	0.044768592410775	3.32536337992061	2.86558001665596	0.0279303700015803	0.999880997596556	-3.78581578088504
P0C2W1	FBXO45	0.0984113183094839	3.32918417921422	2.33952781775798	0.0570021624313811	0.999880997596556	-3.78750652849868
P61925	PKIA	0.210658200757667	3.31155655278178	2.27553956011671	0.0622819024082144	0.999880997596556	-3.79046217130508
Q9Y2T2	AP3M1	0.0875475017056032	3.32855042463264	2.69389104861689	0.0351332963598767	0.999880997596556	-3.79143552887583
Q9Y2X9	ZNF281	-0.0769418054080376	3.3142468366389	-2.60739696346341	0.0394912049504693	0.999880997596556	-3.7968240988525
Q99453	PHOX2B	-0.0666159543597081	3.34731016214807	-2.62529207320825	0.0385446229623773	0.999880997596556	-3.79924807521586
Q6NXR4	TTI2	0.0805011791846463	3.31599667765865	2.55162486522413	0.0426025579371296	0.999880997596556	-3.80072055980584
O75953-5	DNAJB5	-0.120861357085988	3.33435825577082	-2.36495650129242	0.0550351438737645	0.999880997596556	-3.80155726769682
Q5VYS8-1	ZCCHC6	-0.147551066282895	3.32337220215356	-2.39922849796915	0.0524953483699915	0.999880997596556	-3.80374582808168
Q6PJG6-1	BRAT1	0.0571857672450357	3.32283602237812	2.73347113522194	0.0333125149313988	0.999880997596556	-3.80454349423072
P04179	SOD2	-0.0866597118504029	3.30433407051212	-2.66937211851184	0.0363141892810546	0.999880997596556	-3.81320508491289
Q01658	DR1	0.157466573716671	3.30553429706784	2.24511115872152	0.0649678403701862	0.999880997596556	-3.81868370660656
Q9UKA9-3	PTBP2	-0.077889790317261	3.30932768549184	-2.44297341107332	0.0494303063967584	0.999880997596556	-3.82332461417626
P17029	ZKSCAN1	-0.106635752750881	3.32531892675736	-2.35268326487239	0.0559755551085616	0.999880997596556	-3.82492106644642
Q9BW30	TPPP3	-0.233257147991807	3.30584706050277	-2.49305360508298	0.0461503454552848	0.999880997596556	-3.83274655092915
Q9Y5K8	ATP6V1D	0.104687941621827	3.31995479340474	2.45477682428264	0.0486358184625908	0.999880997596556	-3.83526297384129
Q12788	TBL3	0.0715757020449311	3.33779957101075	2.90897731486644	0.0263724282405238	0.999880997596556	-3.83654514695452
O43361	ZNF749	-0.154861274560515	3.33214260829523	-2.21457508681844	0.0677836163116977	0.999880997596556	-3.83818093986975
P17174	GOT1	0.0462007663324396	3.31969670567994	2.91870730651004	0.0260361251116534	0.999880997596556	-3.84111085193611
P27816-1	MAP4	0.0491605225486977	3.31558471832804	3.00008707012939	0.0233979096259824	0.999880997596556	-3.84197545783457
Q9UPR5	SLC8A2	0.496345840805567	3.34042679300843	2.21987564875613	0.0672859728323975	0.999880997596556	-3.84322366425536
Q5T6V5	C9orf64	0.104348205924084	3.341778198753	2.4959018870126	0.0459708119275288	0.999880997596556	-3.84375240641163
Q5H9L2	TCEAL5	0.187200400611003	3.31290394813463	2.34223875014828	0.0567890191660276	0.999880997596556	-3.84552855781506
Q8NG27	PJA1	-0.170512156791009	3.30143805746423	-2.21506235643246	0.0677377112788084	0.999880997596556	-3.84662670032866
O95297-1	MPZL1	0.102554326863725	3.30741337663235	2.29796595187736	0.0603760149788982	0.999880997596556	-3.84751432791068
P28482	MAPK1	0.078728382803457	3.32153513702458	2.53726516674026	0.0434448819358515	0.999880997596556	-3.84902905785245
Q5TEC3	ZNF697	-0.225711357631092	3.34772986526018	-2.20852273995174	0.068356475332011	0.999880997596556	-3.85414389505147
Q16849-1	PTPRN	0.246757212772988	3.30405898899128	2.19490009586937	0.0696641540832797	0.999880997596556	-3.85429629922995
Q8N9T8	KRI1	-0.0687981780525593	3.32164342160153	-2.59957471750976	0.0399126820899804	0.999880997596556	-3.8595028428401
Q9BTK6	PAGR1	0.22491651343342	3.33490942084351	2.18619705500608	0.0705130149696085	0.999880997596556	-3.86220666479841
Q5JS54-2	PSMG4	0.139660014756538	3.34238785396241	2.20148474502119	0.0690288930259623	0.999880997596556	-3.86295787100116
P53680	AP2S1	0.10517256036621	3.29137019665128	2.29716166311292	0.0604433114047797	0.999880997596556	-3.86835805473403
Q15126	PMVK	0.135531865847729	3.34117043213554	2.45890767621465	0.048360944512096	0.999880997596556	-3.87085778828427
Q9UG01	IFT172	0.0609120338253177	3.33202230239389	2.78062692223617	0.0312737805875712	0.999880997596556	-3.87838800312881
Q9C0H9-5	SRCIN1	-0.0601148694132985	3.31871879273534	-2.44701024992561	0.0491570663589457	0.999880997596556	-3.87911587802547
Q16864-2	ATP6V1F	0.0971932329082907	3.30362488168262	2.32887808241395	0.0578475689890234	0.999880997596556	-3.88436061858851
Q92698	RAD54L	0.0778405640913824	3.33949762712063	2.4638062980366	0.048037093401041	0.999880997596556	-3.88832048750673
Q13643	FHL3	0.0868644142796889	3.31779335095155	2.33274220969127	0.057539326728568	0.999880997596556	-3.90044372049988
P37235	HPCAL1	0.101909832683568	3.30531034298801	2.39434566754255	0.0528495956004749	0.999880997596556	-3.90398318461644
Q9H792	PEAK1	0.11411996429504	3.31647532805106	2.32284133401677	0.0583325603968914	0.999880997596556	-3.90911230994266
Q7Z3E5	ARMC9	0.0698481139077361	3.31769091057249	2.46644959793946	0.0478632894877403	0.999880997596556	-3.90976349432459
O15397-1	IPO8	0.058074133716247	3.31755501928968	2.67761903192241	0.0359123508408135	0.999880997596556	-3.9112132096312
P54619-3	PRKAG1	0.0909440218708311	3.31092972004724	2.45929957715844	0.048334951550679	0.999880997596556	-3.91129795746192
Q9UG56-3	PISD	0.139917481740405	3.32766935366732	2.28030922145866	0.0618714057462081	0.999880997596556	-3.9206773113434
Q8N4L2	TMEM55A; PIP4P2	0.238102160807266	3.33466979485134	2.13015740165834	0.0762388586501661	0.999880997596556	-3.92233312602203
A2VDJ0-5	KIAA0922; TMEM131L	-0.102528597656117	3.31961164418883	-2.31462456771732	0.0589994898819178	0.999880997596556	-3.92576101504879
P49006	MARCKSL1	0.0690092247828805	3.30890681018543	2.79911032757366	0.0305114420903322	0.999880997596556	-3.93212963756411
Q9UBT2	UBA2	0.0828165216845005	3.33702924089235	2.28613636259421	0.0613736957665134	0.999880997596556	-3.9332724868836
O60936-3	NOL3	0.264702015885368	3.2912062312403	2.14436202086862	0.074743938690793	0.999880997596556	-3.94074108296739
Q2VPK5-1	CTU2	0.0746628151210837	3.31769541153592	2.37110507802902	0.0545702259674372	0.999880997596556	-3.95071907800327
Q96K58-2	ZNF668	-0.123544809799535	3.32615540826103	-2.24059156239715	0.0653768752279541	0.999880997596556	-3.95977150149247
P42566-1	EPS15	0.114602611601466	3.30788527032061	2.69585162725037	0.0350406516532006	0.999880997596556	-3.96143117679614
O95352	ATG7	0.0678539071490037	3.32381222009303	2.56310376034523	0.0419416254226513	0.999880997596556	-3.96302149550041
Q15834	CCDC85B	0.0935315360359316	3.32999949166438	2.19070943102932	0.0700715775940157	0.999880997596556	-3.96329142325129
Q9NPJ3-1	ACOT13	-0.111831719129977	3.29013503931318	-2.14870446290841	0.074292937209605	0.999880997596556	-3.9773751432563
Q9H1X3-3	DNAJC25-GNG10; DNAJC25	0.205847833527734	3.27156355710451	2.11814342862098	0.0775270433970344	0.999880997596556	-3.97991379437045
P10909-2	CLU	0.113113121241697	3.31821036687534	2.07620480193547	0.0822002598704678	0.999880997596556	-3.98268128256216
O75820-1	ZNF189	-0.255167304317041	3.32173534838445	-2.16492197101779	0.0726330759236918	0.999880997596556	-3.98421322587965
P30304	CDC25A	0.182492835405896	3.31387036549612	2.06320903022621	0.0837057239050744	0.999880997596556	-3.98563155488579
Q96T92	INSM2	-0.103194413731876	3.29364221875953	-2.17235562353753	0.0718849827606282	0.999880997596556	-3.98669136004658
Q9UID6	ZNF639	-0.119208436322381	3.30623236748421	-2.43491766428007	0.0499803417268819	0.999880997596556	-3.99149049052248
Q86TG7-1	PEG10	-0.110812043584862	3.3319813408545	-2.34247828508009	0.0567702259735946	0.999880997596556	-3.99399553676562
Q96EX3	WDR34	0.0720660038490776	3.33952184628216	2.24076191872893	0.0653614094693175	0.999880997596556	-3.99542914012423
Q9UL40-1	ZNF346	-0.0848410223771878	3.32482851613354	-2.37706691927257	0.0541233370941137	0.999880997596556	-3.99647795294133
P55197-1	MLLT10	-0.0773074529196641	3.31887228795542	-2.28465578130898	0.0614997616177871	0.999880997596556	-3.99821514866915
P48047	ATP5O	-0.131717955577785	3.2982674718024	-2.46676009911283	0.0478429165955915	0.999880997596556	-4.00432490259243
Q9H3M7	TXNIP; LOC101060503	0.138640130748113	3.3387337212024	2.30891961981165	0.0594671947439136	0.999880997596556	-4.00726934844486
P13611-2	VCAN	0.0908260124977608	3.32327191382755	2.1528374631596	0.0738662731771633	0.999880997596556	-4.00820649530461
P0DJ07	PET100	0.321059504924944	3.31548503880008	2.03081744400658	0.0875808081140125	0.999880997596556	-4.01024039792123
Q6PCD5	RFWD3	-0.0706903759239825	3.32050505977412	-2.29132333337969	0.0609341521272392	0.999880997596556	-4.01765454848963
Q9BRQ8-1	AIFM2	0.0970878615275199	3.32434394163299	2.21823011004703	0.0674400604735071	0.999880997596556	-4.01843597353272
O75886	STAM2	-0.0962979154095225	3.31584498797297	-2.22116047265471	0.0671659144207657	0.999880997596556	-4.01932543158329
Q6ZMI0-1	PPP1R21	0.068471907756172	3.3147409061658	2.4340819763038	0.0500377673658987	0.999880997596556	-4.02723207945284
P40227-1	CCT6A	-0.0366188124817722	3.32121449473902	-3.02845297474416	0.0225474413313145	0.999880997596556	-4.02951713429746
Q9H211	CDT1	0.110725268544608	3.32056936750699	2.04567439281316	0.0857813882095864	0.999880997596556	-4.02977644186843
Q9BVJ6-1	UTP14A	-0.0809063806377363	3.32553850935212	-2.63158021153436	0.0382177434498167	0.999880997596556	-4.03200052653628
P20645	M6PR	0.107310355387868	3.31081187906911	2.3819961891101	0.0537567312904027	0.999880997596556	-4.03618080276984
Q93100-1	PHKB	0.0517115340526914	3.31622837149643	2.52709005340489	0.0440523687967526	0.999880997596556	-4.03888153920232
Q15935	ZNF77	-0.186351370392785	3.33941953202106	-2.00196921456087	0.0911844163559608	0.999880997596556	-4.04628399959395
Q96RP9	GFM1	-0.0669250821241708	3.30587273029296	-2.88230983066368	0.0273183570504797	0.999880997596556	-4.04670495702996
Q9UNS2	COPS3	-0.0344247294281541	3.32013958096257	-2.77001850499167	0.0317205058707114	0.999880997596556	-4.05084940502084
O15539	RGS5	-0.0718850923454151	3.32759622655801	-2.27601185317625	0.0622411295086883	0.999880997596556	-4.0518707516203
P47755	CAPZA2	-0.0668627844696043	3.31060217580494	-2.4821825355817	0.0468423801374452	0.999880997596556	-4.05270219288014
O95671-1	ASMTL	0.10288068954879	3.319854238135	2.17009162180951	0.0721119829337354	0.999880997596556	-4.05467728050985
Q99549	MPHOSPH8	0.0468948120617997	3.31927914042453	2.55050815140607	0.0426674407539753	0.999880997596556	-4.06399835122926
P16402	HIST1H1D	0.210184833837035	3.3115963762695	1.96757983084985	0.0956758314394199	0.999880997596556	-4.06739134597963
Q14520-1	HABP2	-0.467573043478319	3.33574374696979	-1.97051834454178	0.0952835149328171	0.999880997596556	-4.0682926074177
Q5MNZ9	WIPI1	0.114775866503053	3.31008391341463	1.98912644224385	0.092836398561803	0.999880997596556	-4.07708308396412
Q0PNE2	ELP6	0.162742518369288	3.30775865613882	2.15455148672252	0.0736900647267678	0.999880997596556	-4.07729392795663
Q9BRQ6	CHCHD6	-0.159030836604711	3.3276882433223	-2.28662505216908	0.0613321444756117	0.999880997596556	-4.08193299232555
P07108-5	DBI	0.417078792837875	3.29810526229281	2.44346635598052	0.0493968554424118	0.999880997596556	-4.08584293574469
O15535-2	ZNF193; ZSCAN9	-0.233380337349379	3.32206616488376	-2.07590730738635	0.0822344132362373	0.999880997596556	-4.08717515264231
P10244	MYBL2	-0.0553948148963198	3.31816508759092	-2.50066690180751	0.0456721035488541	0.999880997596556	-4.08757688024456
Q9Y4D7-1	PLXND1	0.140887002748139	3.3317330711144	1.94252122210885	0.0990878174696366	0.999880997596556	-4.08790212159855
Q9NYW8	RBAK	-0.241787271927576	3.32475318252124	-2.18029212444111	0.0710949985870611	0.999880997596556	-4.09285885634556
Q05BQ5	MBTD1	0.0820817841725693	3.31868839526668	2.21364622823172	0.0678712115654042	0.999880997596556	-4.09286235680188
Q9NZ09-1	UBAP1	0.154670898289665	3.3266918165804	2.1917330976887	0.0699718296557278	0.999880997596556	-4.09485452321656
Q8TB03	CXorf38	0.0915325814266961	3.32981827628273	2.12092791379669	0.0772265166989483	0.999880997596556	-4.09698210827398
P13498	CYBA	-0.341922226005712	3.31322282144795	-2.01745781258051	0.0892314286479915	0.999880997596556	-4.10371357503121
P12814-1	ACTN1	0.0515750483186999	3.33270616552758	2.86864772603081	0.0278170522198744	0.999880997596556	-4.1039949508922
Q9P0R6	GSKIP	0.168110499366839	3.31826139837594	1.96397698583877	0.0961590535245685	0.999880997596556	-4.10762952764488
Q9P0P0	RNF181	0.255382636938028	3.30048207557233	2.01111241356398	0.090026382008498	0.999880997596556	-4.11224622068506
P61289-2	PSME3	0.065938835513998	3.33430078919216	2.75791786749771	0.0322384157984839	0.999880997596556	-4.11445532393118
Q9UNH5-2	CDC14A	0.179391695495253	3.29852128725628	1.93521603080811	0.100105227312342	0.999880997596556	-4.12039440661223
Q96TA1	FAM129B	0.0768970823264868	3.33605609585692	2.3508657336548	0.056116235891238	0.999880997596556	-4.12065925310316
Q15036-1	SNX17	0.0760066086190592	3.34807217923954	2.36528339839238	0.0550103222898659	0.999880997596556	-4.12069562759539
Q8TAD8	SNIP1	-0.070046236633726	3.31873592257658	-2.33531839992176	0.0573347724520723	0.999880997596556	-4.12667890479308
P36941-1	LTBR	0.290631554311552	3.31914273571025	1.9649423309785	0.0960293396407855	0.999880997596556	-4.12966129340786
P19447	ERCC3	0.089057553693318	3.32057769609493	2.32723436712678	0.0579792082981942	0.999880997596556	-4.13193964269619
P00390	GSR	-0.0547494182363761	3.31498487953136	-2.57162999568652	0.0414577185017115	0.999880997596556	-4.13229275443317
Q9NRN7	AASDHPPT	0.0788498578447937	3.32887192715678	2.5385552634025	0.0433684925883226	0.999880997596556	-4.13236288597227
Q96EP5	DAZAP1	-0.122047163862785	3.35961537266627	-2.17486277684439	0.0716344575560191	0.999880997596556	-4.13327292024868
Q8N5U6-2	RNF10	-0.089209450646423	3.32725418855497	-2.07228262749674	0.0826516974189444	0.999880997596556	-4.13668823530115
O43325	LYRM1	-0.224880865070393	3.29564085907547	-1.90945369542245	0.103777165048088	0.999880997596556	-4.13862327886825
Q9P0J7	KCMF1	-0.13207130825811	3.31063946102588	-1.91251547177656	0.103333828775828	0.999880997596556	-4.13873772040618
Q9Y3C5	RNF11	0.152694068031052	3.28457397761633	1.88493249529848	0.107396715416614	0.999880997596556	-4.14007142697444
Q9NUI1	DECR2	0.137061214317751	3.34077589262495	1.89194864103411	0.106348440308983	0.999880997596556	-4.14237576919883
P78316	NOP14	-0.043080157580048	3.32741555753993	-2.50703873488894	0.0452758558124949	0.999880997596556	-4.143822484727
Q15326	ZMYND11	-0.103147110802722	3.31679192459595	-2.22169920263001	0.0671156392754894	0.999880997596556	-4.14619644960839
P00367	GLUD1	-0.0425598843732067	3.30089918026102	-2.83720572691474	0.0290023020078897	0.999880997596556	-4.14666419758729
P11217	PYGM	0.125260279127253	3.31251422789874	2.05622137893155	0.0845267203235494	0.999880997596556	-4.15587178254284
Q5EBL2	ZNF628	-0.209647683893409	3.31636494005482	-1.90759578822918	0.104047107560665	0.999880997596556	-4.15717629616794
Q92630-1	DYRK2	-0.148132099404065	3.33940160588018	-1.85622467421161	0.111793735851896	0.999880997596556	-4.16630747566988
Q9H0A8-1	COMMD4	0.0798288147128986	3.32617323328991	2.21050148054056	0.0681686401140324	0.999880997596556	-4.16763667188095
Q96EV8-1	DTNBP1	-0.0697257768199406	3.32431169673505	-2.09443789771631	0.0801343109595881	0.999880997596556	-4.17337551157946
Q9Y586	MAB21L2	0.100445642727155	3.3152136276371	1.93365065569987	0.100324595058349	0.999880997596556	-4.17682983803616
Q9H115	NAPB	-0.107059120291911	3.311791616761	-2.03782211165897	0.086727721049147	0.999880997596556	-4.1801027417877
P82912-1	MRPS11	-0.143884504288958	3.29832334277427	-2.15258478246733	0.0738922861989678	0.999880997596556	-4.18151658041957
Q9GZQ3	COMMD5	0.0759796758055317	3.32711959978268	2.01243338621013	0.0898603036635368	0.999880997596556	-4.18255407305272
O15231-6	ZNF185	0.147314475706593	3.32937553487709	1.85964087460839	0.111261289887053	0.999880997596556	-4.18425972799983
O75147	OBSL1	0.0547993998920635	3.32032048840746	2.45463131408277	0.048645530796206	0.999880997596556	-4.18566131255951
Q9ULJ6-1	ZMIZ1	0.143680105601408	3.32156281252574	2.20517721460754	0.0686752666030288	0.999880997596556	-4.18578582135008
O75298	RTN2	0.115028145662455	3.34125206838382	1.84661102029407	0.113305668811185	0.999880997596556	-4.18770110409135
O14981	BTAF1	0.0457416136595174	3.3217169330002	2.58420238437819	0.0407549139123538	0.999880997596556	-4.19390898716077
P40425	PBX2	-0.0827013412126983	3.32087166291114	-2.15595748839189	0.0735458433329017	0.999880997596556	-4.19412528045918
O95639	CPSF4	0.0700560124996877	3.32041025651576	2.40100664815401	0.0523669613345709	0.999880997596556	-4.19426575477995
P06753-2	TPM3	0.0694253030734429	3.32103938029327	2.2671790069747	0.0630082574341561	0.999880997596556	-4.20001344590984
Q96K17-1	BTF3L4	-0.0943322983916098	3.32345639023672	-2.28896154795546	0.0611338839816505	0.999880997596556	-4.20053813467144
Q6NZ36-2	C1orf86; FAAP20	-0.133266281580891	3.3266257670273	-1.8769967749191	0.108594749670808	0.999880997596556	-4.20326023002808
Q08ER8	ZNF543	-0.162111409042639	3.31544489727533	-1.80974288811691	0.119293195487036	0.999880997596556	-4.20651062598327
Q13547	HDAC1	-0.0589566416858523	3.31975602537914	-2.40142523732711	0.0523367858545158	0.999880997596556	-4.21041006681941
Q9H3R5	CENPH	0.0739933693463717	3.32101222411339	2.35208463843985	0.0560218494723142	0.999880997596556	-4.21134646542106
Q8WTR2	DUSP19	-0.118746940631855	3.31148249473765	-1.86625226020569	0.110237962791821	0.999880997596556	-4.2123885211583
Q9NVG8	TBC1D13	0.0662190687517326	3.316577817207	2.23693048269909	0.0657101592009113	0.999880997596556	-4.21343135775827
P83916	CBX1	-0.0966673740728613	3.31582652223841	-2.38365875354588	0.0536336660968959	0.999880997596556	-4.21382058300965
Q96A58	RERG	0.0709985669268556	3.31895323563704	2.11439727242385	0.077933244670911	0.999880997596556	-4.21608087783966
Q9UJY1	HSPB8	-0.139466589546728	3.32089498221531	-1.81115106674225	0.119058884363793	0.999880997596556	-4.2165007081492
Q9Y664	KPTN	0.0762445580034368	3.31581234004195	1.96616870480426	0.0958648042109935	0.999880997596556	-4.21728624368424
Q8N1F8	STK11IP	0.0651735937540147	3.33104371906565	2.13237436298044	0.0760035454171347	0.999880997596556	-4.21850147142402
Q9BXI3	NT5C1A	-0.0830868207628671	3.32445944980625	-2.18215014997693	0.0709113440370263	0.999880997596556	-4.21916205519764
O94844	RHOBTB1	0.258623762677722	3.31938921335068	1.83244086119251	0.115571084507188	0.999880997596556	-4.22072464551844
Q8WXW3	PIBF1	-0.0924639321214798	3.31519332072538	-2.44737064730194	0.0491327493938628	0.999880997596556	-4.22544669011408
Q96NC0	ZMAT2	-0.0618835617580311	3.32264649497405	-2.43372219767377	0.0500625114111002	0.999880997596556	-4.23237835755249
O94925-1	GLS	-0.191487656338828	3.28640945494462	-1.77944550805172	0.124445488447459	0.999880997596556	-4.23333150956969
Q9H857-2	NT5DC2	0.0950493365898475	3.30358373224749	2.30536850406671	0.059760264488816	0.999880997596556	-4.23603740895385
P49721	PSMB2	0.108589880795467	3.32458256262963	2.66528945859817	0.0365148880521696	0.999880997596556	-4.24257430124413
Q8WUX9	CHMP7	0.083592542002522	3.31684533205597	2.18477261962446	0.0706529568615562	0.999880997596556	-4.24433279355566
P21266	GSTM3	0.127980647114163	3.34642921043182	2.42215034353459	0.0508652474033833	0.999880997596556	-4.24689407088199
P24864-1	CCNE1	-0.188026420000482	3.31176318338363	-1.75424949770113	0.128895554272102	0.999880997596556	-4.25260205772312
Q9HAV4	XPO5	0.0766496275334955	3.31983555083575	2.73767900513891	0.0331249471652375	0.999880997596556	-4.25516880239543
Q8N720-3	ZNF655	-0.0982522971361331	3.32378942414625	-2.07178993777121	0.0827085830422714	0.999880997596556	-4.25620690387247
Q9Y6M7-13	SLC4A7	0.216657310304263	3.31055327081308	1.86740479654717	0.110060526555994	0.999880997596556	-4.25942607162575
Q8NAF0	ZNF579	-0.0984564530789546	3.31435073617594	-1.88982782466009	0.106664233009825	0.999880997596556	-4.26128633847947
O60337	MARCH6	-0.222283803647437	3.31804852759444	-1.81402636868187	0.118581857959306	0.999880997596556	-4.26463150662238
Q01804-1	OTUD4	-0.124319781637673	3.32079754187491	-2.31793348144599	0.0587299684368665	0.999880997596556	-4.26472536549627
P60484-2	PTEN	0.0714818840166994	3.31860691284394	2.00557489540144	0.09072595616867	0.999880997596556	-4.26760538112036
Q9UJJ9	GNPTG	-0.170461381624435	3.31398606271046	-1.72466040310248	0.134319666535531	0.999880997596556	-4.26883711557853
P52198	RND2	0.12578727212658	3.33062889501091	1.748198737603	0.12998712536803	0.999880997596556	-4.26886416173816
O95199-1	RCBTB2	0.121273852064075	3.32745302842838	1.77005333729839	0.126086489864725	0.999880997596556	-4.26955660145889
Q9H5Z1	DHX35	0.0737949279063238	3.31686575576406	2.1537414009571	0.0737732911033384	0.999880997596556	-4.2705095018283
Q9P2G1	ANKIB1	-0.0672708562583064	3.32078836424805	-2.10646698480617	0.0788003086974245	0.999880997596556	-4.27329714576924
Q96CS4	ZNF689	-0.0749136092491745	3.32774656138195	-2.02682550329727	0.0880707680035758	0.999880997596556	-4.27386509157501
P35520-2	CBS; LOC102724560; CBSL	0.0363110052012737	3.3208958081472	2.54907611303594	0.0427507971497459	0.999880997596556	-4.27484962847982
Q9P1W3	TMEM63C	0.148788249310878	3.32067071159023	1.86103344599387	0.111044965434657	0.999880997596556	-4.27520622058676
Q9GZP4	PITHD1	0.116488206239497	3.3531375737673	2.09627808550062	0.0799287581970842	0.999880997596556	-4.27565461780756
Q16659	MAPK6	-0.110324205945405	3.31716230416451	-1.74889221438145	0.129861565209564	0.999880997596556	-4.27753794993585
O00291	HIP1	0.105041326613838	3.30500715740601	2.43174977288234	0.0501983943455988	0.999880997596556	-4.27841328744286
P61599	NAA20	0.113669173377947	3.35091075312739	2.01436932058113	0.0896174676309039	0.999880997596556	-4.27916993604276
O14810	CPLX1	0.448552817451294	3.23138123746793	1.96077331688783	0.0965907921316451	0.999880997596556	-4.28168481273027
Q8N141	ZFP82	-0.141556964815282	3.30174611539894	-1.78792569675095	0.122981788235483	0.999880997596556	-4.28200454549854
P29558-2	RBMS1	-0.0832963262662249	3.31675617405295	-2.08853562149727	0.0807972424414141	0.999880997596556	-4.28264684219215
Q96QA6	YPEL2	-0.144674610917145	3.33328014109897	-1.70433042143664	0.138174155002243	0.999880997596556	-4.28558899358755
P15056	BRAF	0.0617221985757832	3.31985665419981	2.20433049064767	0.068756192121969	0.999880997596556	-4.28830936811596
P54727	RAD23B	0.05826508526721	3.31895629632466	2.40088267297472	0.0523759020129849	0.999880997596556	-4.29219810232186
O00287	RFXAP	-0.0620106086644772	3.32326248084227	-2.05720233754883	0.0844109744856734	0.999880997596556	-4.29265916717472
Q92882	OSTF1	0.0659434509232572	3.32545118400823	1.99861661284578	0.091612790714742	0.999880997596556	-4.29466135906778
P82970	HMGN5	-0.0644720601840243	3.30523289846273	-2.24533943764568	0.0649472507380107	0.999880997596556	-4.29494906682125
Q9H2K2	TNKS2	-0.0928187329240397	3.31590979551957	-1.80366364500632	0.120309949049936	0.999880997596556	-4.29789853447617
Q9P253	VPS18	0.060589340696649	3.31554167996567	2.34356363849243	0.0566851534409827	0.999880997596556	-4.29876156308772
Q6P2D0-1	ZFP1	-0.178671760617201	3.31709644361139	-1.80678196998724	0.11978735047684	0.999880997596556	-4.30273011878969
Q15369-1	TCEB1; ELOC	0.0901226130507567	3.33469080129873	2.48883721477025	0.0464174690605709	0.999880997596556	-4.30353913399424
P02794	FTH1	0.0887043008331885	3.32935269347743	2.06044843796106	0.0840291025472453	0.999880997596556	-4.30552955181194
Q16594	TAF9	0.102073753612262	3.31564169812328	1.72350869291942	0.134535214184964	0.999880997596556	-4.30771002208076
Q16626	MEA1	0.189550473312424	3.29964848322435	1.73929846621756	0.131609125302096	0.999880997596556	-4.3124200370421
O43913	ORC5	0.0740923282758297	3.33004560877151	2.19989688902672	0.0691815364146712	0.999880997596556	-4.31426782492837
Q9H0E3-3	SAP130	-0.0985069108792693	3.31901051208995	-2.21659507051403	0.0675935247863221	0.999880997596556	-4.31868908314414
Q12891	HYAL2	0.327510717910981	3.32786061950465	1.67502022352255	0.143919956303097	0.999880997596556	-4.31892336613095
P0C0L4-1	C4A; C4B	-0.133351016747135	3.33091396533854	-2.03624768800662	0.0869187328527178	0.999880997596556	-4.31980012510291
P17706-1	PTPN2	0.0608715201786348	3.33711816047957	2.11971802090091	0.0773569529964488	0.999880997596556	-4.32114189390295
Q969W1	ZDHHC16	0.165503636503303	3.32752161024246	1.65273513387231	0.148441793044872	0.999880997596556	-4.32323632309979
Q96F63	CCDC97	0.113050633745325	3.34787733923616	2.03473315963593	0.087102879388798	0.999880997596556	-4.3242230848218
Q8WTW3	COG1	0.0443736963720878	3.32835172517317	2.28623993362959	0.0613648871080218	0.999880997596556	-4.32547882005091
P05060	CHGB	0.0762795213363683	3.31425547422464	2.182396799203	0.0708870008802396	0.999880997596556	-4.32623819480976
O95696-2	BRD1; LOC90834	0.13132660748856	3.32537273760767	1.77908132555481	0.124508727504169	0.999880997596556	-4.32785393236331
Q8N565-2	MREG	0.0932407984764943	3.30635024001915	1.81264375768827	0.118811004803339	0.999880997596556	-4.32871069462552
P18074-1	ERCC2	0.0632515633325257	3.32841267634287	2.16982995657599	0.0721382661245682	0.999880997596556	-4.33017636388108
Q9P1U0	ZNRD1	0.153386070261222	3.32804721985229	1.67661084262266	0.143602318136463	0.999880997596556	-4.33552375408954
Q9UKL6	PCTP	0.0956491290386665	3.30580757094951	2.00679360542567	0.0905715235526734	0.999880997596556	-4.33636673329963
O43175	PHGDH	0.0330603424056579	3.32831031904758	2.87215234933298	0.0276881997327773	0.999880997596556	-4.34129193905501
Q9H336	CRISPLD1	-0.12977882105121	3.33956910621427	-1.66089160978941	0.146771170979524	0.999880997596556	-4.34278026833739
O75489	NDUFS3	0.114040241111291	3.30814048469065	2.10151383411631	0.0793468442399755	0.999880997596556	-4.34447085837966
O15304	SIVA1	-0.11990527365946	3.34975606716298	-1.66346410990372	0.14624802034679	0.999880997596556	-4.34528507535026
P61088	UBE2N	0.0467865059607072	3.3151534809242	2.31327205987228	0.0591100252698673	0.999880997596556	-4.3465743596353
Q96EH3	MALSU1	0.224982525423564	3.29521719883358	1.8775480091836	0.108511104533848	0.999880997596556	-4.35207166780425
Q02833-1	RASSF7	0.153947577931188	3.3184323298269	1.63401239046284	0.152345784683121	0.999880997596556	-4.352723667949
Q9H8W3	FAM204A	-0.0595786950256629	3.3129183974748	-2.04440664512488	0.0859334631622529	0.999880997596556	-4.35294885805407
O15217	GSTA4	0.0693448833173522	3.30259318736352	2.04005393792585	0.0864576790603833	0.999880997596556	-4.35468684637111
Q13158	FADD	0.0848624208393195	3.35981424396744	1.82603661240235	0.116609545238231	0.999880997596556	-4.35561239441881
Q9NNX1	TUFT1	0.139826130184683	3.31366791718067	1.60830447005432	0.157866316676662	0.999880997596556	-4.35599842890057
Q9NX01	TXNL4B	0.134849987992088	3.33004937276801	1.73606610094285	0.132203055524335	0.999880997596556	-4.3570185123825
Q13428-7	TCOF1	-0.0973885415578221	3.31270201224239	-1.67615624868096	0.143693029210747	0.999880997596556	-4.35767732170454
P02545	LMNA	-0.131113194966663	3.32714038560447	-1.99941410674658	0.0915107086487304	0.999880997596556	-4.360530183611
Q86TH1	ADAMTSL2	-0.217775387136848	3.30946860398265	-1.60229822253549	0.159183273450065	0.999880997596556	-4.36244250890072
Q96IL0	APOPT1	-0.114648138549545	3.29395922155543	-1.66774779000189	0.145380850899082	0.999880997596556	-4.36469456589818
Q8NC67	NETO2	0.0764371977901348	3.32157324976863	1.94346911433393	0.0989565624249615	0.999880997596556	-4.36483474036937
Q99717	SMAD5	0.0695753552885958	3.30736868772637	1.91674160079864	0.102724995821648	0.999880997596556	-4.3674741299695
O75575-1	CRCP	0.143521935621178	3.31603775938814	1.84263448663389	0.113936945437851	0.999880997596556	-4.36802731129077
O95772-1	STARD3NL	0.181290246136606	3.32127473283191	1.62350117743663	0.154580353789704	0.999880997596556	-4.36980785193265
Q5T0F9-2	CC2D1B	0.0781870506763793	3.31666132277648	1.86372841505845	0.110627505818832	0.999880997596556	-4.37266509788281
Q8WUH2	TGFBRAP1	-0.0681053755545992	3.31484443896256	-1.95684473652301	0.0971228752708648	0.999880997596556	-4.37294726144828
O94842	TOX4	0.0659801815404625	3.33084579426469	2.08412092295265	0.0812967349979502	0.999880997596556	-4.37317936272313
Q92543	SNX19	0.259116254126892	3.3441900965329	1.57779415495614	0.164664933420605	0.999880997596556	-4.3749181394418
Q86XR8-1	CEP57	-0.143045227886405	3.31354187539137	-1.98259075891539	0.0936886163610491	0.999880997596556	-4.3766078941775
P37198	NUP62	0.0394651573911126	3.32328100261093	2.42088261651919	0.0509540046162653	0.999880997596556	-4.38071052355905
Q9H7F0-1	ATP13A3	0.112966306162745	3.321538773099	2.15216889872277	0.0739351210912677	0.999880997596556	-4.38401939666651
Q96GP6-1	SCARF2	0.101920363211451	3.3255890407772	1.79498268091225	0.121776601481163	0.999880997596556	-4.38461287232377
P56277-1	CMC4; MTCP1	-0.223666373963888	3.27189986720601	-1.56192452982919	0.168309785437241	0.999880997596556	-4.38542469382539
Q9Y3C0	CCDC53; WASHC3	0.136294584871389	3.32911740078168	1.79411589671816	0.121924004374169	0.999880997596556	-4.38844179344648
O14745	SLC9A3R1	-0.0379307747997037	3.3243730013512	-2.64014865936741	0.0377770533119299	0.999880997596556	-4.3911770287958
O43570	CA12	-0.186394924395922	3.30295372318012	-1.56437057207564	0.167743071682363	0.999880997596556	-4.39141506937437
Q8NFI3-1	ENGASE	0.0643254660509964	3.32779352341334	2.0147392290779	0.0895711431139124	0.999880997596556	-4.39204060903162
A2RUS2	DENND3	-0.346105506412953	3.30186224235215	-1.64713642127774	0.14959906426595	0.999880997596556	-4.39247289881308
Q92613	PHF16; JADE3	0.0679237763430723	3.31437122470302	2.15946460701672	0.0731873564910801	0.999880997596556	-4.39290561399181
Q9NYP3-1	DONSON	-0.0761124100149144	3.32290099723436	-1.78287633807783	0.123851276845576	0.999880997596556	-4.3934146669491
Q0ZGT2	NEXN	-0.231508883165609	3.31708733404716	-1.66218899135191	0.14650710777245	0.999880997596556	-4.39406382286763
Q9NS86	LANCL2	0.068960292261729	3.31627443890078	2.15276258579846	0.0738739806894883	0.999880997596556	-4.39673340737129
Q14254	FLOT2	0.0792320967791167	3.31888945130579	2.17062091025683	0.0720588480977683	0.999880997596556	-4.39751460385699
O95379-4	TNFAIP8	0.139842181642764	3.32864259788424	1.58549501332464	0.162923240091185	0.999880997596556	-4.39788296702965
Q8N3J6-3	CADM2	0.161608902499094	3.32321645360184	1.71075601112896	0.136944456269096	0.999880997596556	-4.40198263827569
Q01664	TFAP4	-0.0645949626599077	3.30992562730815	-2.12546624023873	0.0767392440214299	0.999880997596556	-4.40213770590593
Q8N6N7	ACBD7	0.262506905757817	3.29206911980729	1.81988653095601	0.117615439985396	0.999880997596556	-4.40347901766221
P49427	CDC34	0.123300073602822	3.32067029034493	1.84030999718182	0.114307565944343	0.999880997596556	-4.40841041248826
P10074	ZBTB48	-0.114899755795335	3.31902981487527	-1.72542666460348	0.134176442928242	0.999880997596556	-4.41011196783592
Q8TEX9-2	IPO4	0.0817463869229527	3.33701366169824	2.34200457569493	0.0568073980478301	0.999880997596556	-4.41174896300014
P36507	MAP2K2	0.0593970354366232	3.31518536955297	2.319994192273	0.058562763280089	0.999880997596556	-4.41223984945951
P46063	RECQL	0.0667073729184384	3.34578139607093	2.68184972805856	0.0357080448491917	0.999880997596556	-4.41437091570313
Q8IZ83	ALDH16A1	0.0419020306003076	3.32132567536195	2.35376555643042	0.0558919579110513	0.999880997596556	-4.41493255916287
Q9C0F3	ZNF436	-0.320566135791335	3.30989033166006	-1.51500388470308	0.179535189245505	0.999880997596556	-4.41817429092178
Q9HB19	PLEKHA2	-0.0979442133568203	3.337785275135	-1.65493811494276	0.147988786132851	0.999880997596556	-4.41838079621582
Q8IXB1-1	DNAJC10	0.0771527181304098	3.34161105538666	1.96165648007206	0.0964715800806924	0.999880997596556	-4.418398102965
Q9NS23	RASSF1	0.169170424874124	3.33869525909567	1.53844134331647	0.173842976359539	0.999880997596556	-4.41959811780043
P32314	FOXN2	0.133728808681361	3.31263637229314	1.54497612000036	0.17228629994694	0.999880997596556	-4.4211959462078
Q6ZTU2-6		0.140444872543552	3.31683026524254	1.65237003196579	0.148516998549047	0.999880997596556	-4.42131527137627
P31274	HOXC9	-0.0946125709326391	3.31763172541323	-1.61319303614418	0.156802081522261	0.999880997596556	-4.42190158887009
O75478	TADA2A	-0.122050785077902	3.32942016473371	-1.89831031258724	0.105406741100594	0.999880997596556	-4.42234992341628
P47897	QARS	0.035059543294218	3.32149730750387	2.71818460545709	0.0340035150566158	0.999880997596556	-4.42313401800367
Q8N4N8	KIF2B	-0.12968253742687	3.3376427806009	-1.55543020719572	0.169823195292069	0.999880997596556	-4.42364152984005
Q8IW92	GLB1L2	0.184337727841309	3.32579035943497	1.60419506473219	0.15876623957882	0.999880997596556	-4.42414497783432
P17181-1	IFNAR1	0.168448804096186	3.30394254940362	1.61046867174434	0.157394327635953	0.999880997596556	-4.42562619069614
Q9Y4E5-4	ZNF451	-0.124534704858991	3.32063978948519	-1.63752038087734	0.151606913933504	0.999880997596556	-4.42591766037075
Q8NF64	ZMIZ2	-0.128773931029739	3.32258536552566	-1.82351305693349	0.117021264090163	0.999880997596556	-4.428119384377
Q9UQR1	ZNF148	-0.0616260901903362	3.32891946991338	-2.21229850362781	0.0679985148027505	0.999880997596556	-4.42853814439222
Q99683	MAP3K5	0.141076385270748	3.35355827913779	1.62713286010537	0.153804784459075	0.999880997596556	-4.42921582914947
Q9NUQ8	ABCF3	0.0438383155757911	3.33239624065534	2.33521266319163	0.0573431532481469	0.999880997596556	-4.42962988963551
Q9UGJ0	PRKAG2	0.102125837159714	3.30830563164276	1.65211129223334	0.148570317152216	0.999880997596556	-4.42974781013846
Q9HD47	RANGRF	0.137433428103552	3.30787764691136	1.82656957991042	0.116522774045329	0.999880997596556	-4.43010682892233
Q96CW1	AP2M1	0.137787707884816	3.29685320831606	2.26562533646053	0.0631442008197484	0.999880997596556	-4.4332126083563
Q8NDX5-7	PHC3	-0.109184134818409	3.33784436586538	-1.54636837351583	0.171956341262629	0.999880997596556	-4.4346857320755
Q92499	DDX1	-0.0235753926296745	3.32227320794437	-2.84435964176199	0.0287279379808867	0.999880997596556	-4.43793686707727
P49441	INPP1	0.150599370841307	3.32050823450603	1.69802138060108	0.139391932997183	0.999880997596556	-4.44178666822826
P26440	IVD	-0.0646519639998545	3.30803538577344	-2.18396677559275	0.0707322522205255	0.999880997596556	-4.44360967420425
Q9UBV8	PEF1	0.241380363569336	3.36494944848215	1.52130250053402	0.177988561512796	0.999880997596556	-4.444566604937
Q9H160	ING2	-0.156723077548726	3.31709989255795	-1.63819170469841	0.151465907279353	0.999880997596556	-4.44623901493099
Q9NV64-1	TMEM39A	-0.21196781983234	3.31724716782362	-1.46491053083344	0.192288466384393	0.999880997596556	-4.44791001037343
O95067	CCNB2	0.0509102022531336	3.32005597149629	2.02541801943401	0.088244178067495	0.999880997596556	-4.44814731162249
Q9NRG7-1	SDR39U1	0.0935777042042489	3.31319658200416	1.60593225974376	0.158385216119227	0.999880997596556	-4.4483510910685
P13682	ZNF35	-0.189423249792771	3.3369033665278	-1.71916723387579	0.135350756693093	0.999880997596556	-4.45136099807638
Q504T8	MIDN	-0.13473316654709	3.30746677222366	-1.48844835792529	0.186194705481363	0.999880997596556	-4.45370694733424
Q6ZSJ8	C1orf122	0.347781890480648	3.26687399981023	1.55256474029355	0.17049501737926	0.999880997596556	-4.45466194046457
P53609	PGGT1B	0.0557716337152231	3.32455149125701	2.03778884020762	0.0867317532063557	0.999880997596556	-4.45548450093198
Q05481-1	ZNF91	0.118357026478979	3.28584165391453	1.63701600126152	0.151712937725719	0.999880997596556	-4.4557108452069
Q86UL3	AGPAT6; GPAT4	-0.21633443424352	3.32325336332497	-1.83473871718724	0.115200709108856	0.999880997596556	-4.45814444416695
Q13616	CUL1	0.0486704048477153	3.32499358716749	2.64356212673789	0.03760299833675	0.999880997596556	-4.45925966872488
P27815-1	PDE4A	-0.168587426843728	3.31036519855951	-1.62639431688187	0.153962203858605	0.999880997596556	-4.46021129015391
O60293	ZFC3H1	-0.0348979992698605	3.32949442856702	-2.34683789538748	0.0564293122876472	0.999880997596556	-4.46160482809797
Q8WVZ9	KBTBD7	0.102314549162937	3.30568505157321	1.61789811559299	0.155784242102253	0.999880997596556	-4.46281543290989
Q8IVD9	NUDCD3	0.0392600858232014	3.32456582518396	2.23092849684988	0.0662603412173008	0.999880997596556	-4.46455282884692
Q9BSU1	C16orf70	0.0695751171206438	3.32697166484842	1.7690856199773	0.126256766419955	0.999880997596556	-4.46457106084811
Q4AE62	GTDC1	0.199042289286345	3.32219933301508	1.64637752603704	0.149756593738672	0.999880997596556	-4.46525655484247
Q9NZC7	WWOX	0.161330935979514	3.30225442382267	1.75735772412207	0.128338300763407	0.999880997596556	-4.46756759346026
Q75QN2	INTS8	0.0703280500374359	3.31785641866806	2.04111885267378	0.0863291284910902	0.999880997596556	-4.4681834885018
Q9NPC7-1	MYNN	-0.105263705500313	3.32770444538894	-1.80448908420043	0.120171396633586	0.999880997596556	-4.46902348870027
P09038-4	FGF2	0.182532606553972	3.34573877955847	1.47190474207397	0.1904587164121	0.999880997596556	-4.46959994564187
Q9UMR3	TBX20	-0.0774963971854351	3.33233799173987	-1.96372954578084	0.0961923304388208	0.999880997596556	-4.47089502546899
Q9NW68	BSDC1	0.0625972240361797	3.32144933219341	1.947063206652	0.0984604647530193	0.999880997596556	-4.47398871979481
Q9BWM5	ZNF416	-0.141686794410924	3.28317793223077	-1.437011119424	0.19974967166461	0.999880997596556	-4.47425770084151
P49796-3	RGS3	0.15551813262243	3.33235538123038	1.42600496050694	0.202765545624029	0.999880997596556	-4.47430973942152
Q9HC16	APOBEC3G	0.129076028345617	3.34609973438433	1.58596759659915	0.162816926320896	0.999880997596556	-4.47505733919489
P62714	PPP2CB	0.0899092580291075	3.34385476578452	2.24985839856601	0.0645410460154232	0.999880997596556	-4.47528364471218
Q13610	PWP1	0.0461133679076032	3.33546611458646	2.30940248985515	0.0594274593117545	0.999880997596556	-4.47709310668612
Q9NVX2	NLE1	0.0632897472739187	3.31587364609089	2.22356039506763	0.0669422478276566	0.999880997596556	-4.47894079904364
P31249	HOXD3	0.305909135279158	3.29665953609633	1.42751299514997	0.202349866902798	0.999880997596556	-4.48033509798556
Q13398-8	ZNF211	-0.115007951153283	3.34071704391962	-1.56324428435445	0.168003792960662	0.999880997596556	-4.48175409823233
Q07002-3	CDK18	0.179784057188189	3.32858823906247	1.48187450325777	0.187878368254231	0.999880997596556	-4.48203449492606
Q9H898-1	ZMAT4	-0.0713211405676487	3.31938083488771	-1.81403342306386	0.118580689917062	0.999880997596556	-4.48288949915398
O75618-2	DEDD	0.0796129285923874	3.3351466495924	1.65581097789359	0.147809663068494	0.999880997596556	-4.48644649892202
O15400	STX7	0.0922659677690957	3.31388652680213	1.78925682545554	0.122753568204252	0.999880997596556	-4.4869708174707
Q9BRP1	PDCD2L	0.106063332134721	3.31415511821285	1.84100293258759	0.114196958855478	0.999880997596556	-4.48848100357196
P98175-1	RBM10	0.130601929798261	3.33097698249829	1.52549936913607	0.176964941708671	0.999880997596556	-4.48853520843624
O75925-2	PIAS1	0.0732553731919597	3.31896999507789	1.98213927410871	0.0937477770594631	0.999880997596556	-4.48903068041124
Q8NG68	TTL	0.0823385171192701	3.33123568804103	1.85234407252169	0.11240162042485	0.999880997596556	-4.48981378308977
Q8N587	ZNF561	-0.139938127478799	3.30241863912038	-1.39984347726927	0.210102045009309	0.999880997596556	-4.49031185098791
Q8NBA8	DTWD2	-0.189491075682744	3.33348737569328	-1.54901536885008	0.17133065068871	0.999880997596556	-4.49164660483218
Q6WKZ4-4	RAB11FIP1	-0.0617693677745542	3.31666292836467	-1.95786913481999	0.096983849358223	0.999880997596556	-4.49798045835725
Q96CV9-1	OPTN	0.0569886056555579	3.32619706262053	2.04350740647662	0.0860414983032557	0.999880997596556	-4.49837564816961
P29353-6	SHC1	0.0865399949889194	3.32672490677062	1.72502783843502	0.134250969899162	0.999880997596556	-4.50056748897746
Q8TF72	SHROOM3	-0.063011235275487	3.32458022659658	-2.30076184988431	0.0601426803601102	0.999880997596556	-4.50228733784697
Q9Y5G0-1	PCDHGB5	0.143800095909996	3.31010857292642	1.59257813961204	0.161336670050331	0.999880997596556	-4.5023195933051
Q13045-1	FLII	0.133174833843819	3.35795556666871	1.41455397472887	0.205947496503163	0.999880997596556	-4.50298725561106
Q96EW2-1	HSPBAP1	-0.0978934088092193	3.3209654438886	-1.88844330346536	0.106870892654148	0.999880997596556	-4.5034196646403
Q03164-3	KMT2A; MLL	-0.0510148818319143	3.31829890314455	-2.11355331790857	0.0780250549643481	0.999880997596556	-4.50476276505832
Q8WUP2	FBLIM1	0.135046323815754	3.31924430137454	1.433528352793	0.200699531876212	0.999880997596556	-4.50508246997129
Q05823	RNASEL	0.151914624816545	3.31940982758223	1.79587834577773	0.12162447078037	0.999880997596556	-4.50557974929781
Q49B96	COX19	0.109325210333621	3.30890377460475	1.91492486778314	0.102986282304974	0.999880997596556	-4.5056983726982
Q14814-1	MEF2D	0.0705982524860398	3.3212129863987	1.75603977987103	0.128574298976803	0.999880997596556	-4.50681179429581
Q86V87	FAM160B2	0.15817054894134	3.29942716967962	1.35384730374126	0.223587619555438	0.999880997596556	-4.50748613718797
Q16352	INA	-0.0443738005756847	3.3283986774115	-2.29161834163346	0.0609092513569547	0.999880997596556	-4.50806501629447
Q9Y448	C15orf23; KNSTRN	0.0520531876887851	3.31573958908019	2.05953955058576	0.0841358474308831	0.999880997596556	-4.51013395247862
Q8WVP5	TNFAIP8L1	0.237879677763472	3.35535570678333	1.34350124916544	0.226726449717669	0.999880997596556	-4.5102557651378
Q68CP9-1	ARID2	-0.034003813398084	3.31664058770561	-2.4830900749565	0.0467841924045551	0.999880997596556	-4.51281220547877
Q5T7W0-4	ZNF618	0.12732557655987	3.32533543434435	1.69957832332523	0.139090449915776	0.999880997596556	-4.51376684890114
Q9Y5E4	PCDHB5	0.172128606607154	3.30873047693379	1.37022365328172	0.21869912716832	0.999880997596556	-4.51489652580215
P98155-1	VLDLR	0.145421908733616	3.30786259879762	1.39098819370381	0.212639585456854	0.999880997596556	-4.51515736254669
P56211	ARPP19	0.325515418776693	3.28588969340319	2.05918590772024	0.0841774183848066	0.999880997596556	-4.51546556318307
Q9Y2L8	ZKSCAN5	-0.126059039130345	3.3275700521572	-1.36164010394486	0.221249253847896	0.999880997596556	-4.51794482723854
Q9BSH4	TACO1	-0.0795836689764407	3.30301905189082	-2.04961856705636	0.0853099973607826	0.999880997596556	-4.51878288414907
Q9BUV8-5	C20orf24	-0.289644058423422	3.28899102930583	-1.5628244603212	0.168101074592987	0.999880997596556	-4.5219956063512
Q53HL2	CDCA8	-0.0999516352656152	3.32375958254219	-2.02319181186506	0.0885191637561097	0.999880997596556	-4.52311088991264
P25686-3	DNAJB2	-0.0946654793330607	3.31808705731672	-1.8424250122433	0.113970295703692	0.999880997596556	-4.52343228644594
Q14142	TRIM14	0.14149669562677	3.34323013998741	1.34532885071311	0.226169124825913	0.999880997596556	-4.52516497145827
Q99633-1	PRPF18	0.0758090377161732	3.31793279343651	2.13043033953826	0.0762098483076362	0.999880997596556	-4.52557398294095
P63010-2	AP2B1	0.0585524375162159	3.32140438937765	2.29912884904595	0.0602788503831134	0.999880997596556	-4.52652433425841
P52564-1	MAP2K6	0.0845773704672449	3.32523720702525	2.10982223265969	0.0784322668708538	0.999880997596556	-4.52677496438667
Q9HBL0	TNS1	0.0860292057082116	3.32683526508951	1.83198123263499	0.115645309594039	0.999880997596556	-4.5269164090559
Q16828-1	DUSP6	0.144973699654547	3.3619914836587	1.34943065816239	0.224922755827301	0.999880997596556	-4.52784322033263
Q9HC44	GPBP1L1	-0.104214857237298	3.30990397693824	-1.85137548794276	0.112553855149742	0.999880997596556	-4.53160964613521
O43752	STX6	0.0715094790113189	3.31520082310662	1.81360543007147	0.118651576121382	0.999880997596556	-4.53322049297901
Q9Y3C1	NOP16	-0.167825453236949	3.31676121218519	-2.18460955478647	0.0706689951378306	0.999880997596556	-4.53332467958714
Q8NC69	KCTD6	0.103774077112259	3.35088894613124	1.51468186792529	0.179614596869508	0.999880997596556	-4.53388017627797
Q14CS0	UBXN2B	-0.0883345141588659	3.33312462017286	-1.62449594944848	0.154367543667669	0.999880997596556	-4.53421202320509
Q9NV88-1	INTS9	0.0610557811103266	3.33806250195985	2.13821587608561	0.0753870597654504	0.999880997596556	-4.53677656847938
Q8NCK3	ZNF485	-0.100199880952427	3.32088934062473	-1.4784339620118	0.188765159164737	0.999880997596556	-4.53698765256074
O15370	SOX12	-0.0987321990341958	3.33175049011028	-1.52661106699084	0.176694721658264	0.999880997596556	-4.53803949179077
Q8WUY9	DEPDC1B	0.0747143980561468	3.32030706278656	1.78448337152995	0.123573898272472	0.999880997596556	-4.53804236008308
O75157	TSC22D2	-0.0989300075648924	3.32464375622808	-1.52922219094797	0.176061554565367	0.999880997596556	-4.53883016737089
O43309	ZSCAN12	-0.123151276581933	3.33712064431204	-1.38065692691237	0.215635208551575	0.999880997596556	-4.53975029624819
Q8NB37	PDDC1; GATD1	-0.0822104403690453	3.3174837527441	-1.53971777386393	0.173537878873733	0.999880997596556	-4.54083899427144
Q9NZM4	GLTSCR1; BICRA	-0.0527447806821771	3.32024470194613	-1.97085205047039	0.0952390645339947	0.999880997596556	-4.54134279751245
Q9Y5B8	NME7	0.0548361965793064	3.31697076389304	2.05821590890501	0.0842915492738029	0.999880997596556	-4.54259260205778
P31273	HOXC8	-0.0835172295303076	3.33536152594952	-1.59634078615017	0.160499831189152	0.999880997596556	-4.54487224396705
Q9UH73	EBF1	0.0754781568860602	3.31047164982143	1.59684180320967	0.160388712619466	0.999880997596556	-4.54592205790085
Q9NVV0	TMEM38B	-0.182670030288311	3.31108032754194	-1.37447803388638	0.217445031871442	0.999880997596556	-4.54608192038818
Q9BRT3	MIEN1	0.136252066802661	3.31832674608959	1.60233129843278	0.159175992579514	0.999880997596556	-4.54692124495315
P48380	RFX3	0.0794696249291891	3.31625326954182	1.71578482802172	0.135989459956154	0.999880997596556	-4.5473240523944
Q16629	SRSF7	-0.0845023175130349	3.32193490907768	-2.11882064369284	0.0774538426676898	0.999880997596556	-4.54891183456261
Q92636	NSMAF	0.0683245228062518	3.32933518890475	2.00047730248099	0.0913747938823836	0.999880997596556	-4.55177313593031
Q5JTJ3-2	COA6	0.12154165651574	3.31648564096374	1.9113614326201	0.103500708310726	0.999880997596556	-4.5518551822122
O43556-4	SGCE	0.163514415858584	3.29069408916075	1.31876108446895	0.234392786587153	0.999880997596556	-4.55215655966216
Q5TA31	RNF187	-0.0878659454517566	3.31256168684579	-1.50018295093568	0.183224081296061	0.999880997596556	-4.55490687224996
O95273-1	CCNDBP1	0.113708205684571	3.34231500443809	1.72294142834066	0.134641503530872	0.999880997596556	-4.55505934378814
Q13362-4	PPP2R5C	0.325450738445996	3.31361825616436	1.3443675724555	0.226462112132696	0.999880997596556	-4.55560646676067
Q9BSM1	PCGF1	0.0884867333568467	3.31679440086276	1.6623300617149	0.146478422452623	0.999880997596556	-4.55677811564949
Q96LL9	DNAJC30	-0.137036546001265	3.30504833569062	-1.31054704181682	0.236988746765779	0.999880997596556	-4.55752767618141
P52740	ZNF132	-0.157799229424363	3.31228616432277	-1.28430562671329	0.245453794657716	0.999880997596556	-4.55760112603417
Q96LU5	IMMP1L	0.127716556860241	3.3300275806116	1.35318820259137	0.223786410317885	0.999880997596556	-4.55904264728227
Q86VV8	RTTN	0.082345751016329	3.3276155442282	1.86314527735341	0.110717703878245	0.999880997596556	-4.55916519248963
P22694-2	PRKACB	-0.253376180754541	3.3178887572516	-1.53905782156986	0.173695560506379	0.999880997596556	-4.55998023760797
O60304	ZNF500	-0.15722871184357	3.31103591709889	-1.29343071388248	0.24248033828537	0.999880997596556	-4.56166721567408
Q96SZ6-3	CDK5RAP1	0.0908689263295556	3.30635026432249	2.03069197730505	0.0875961655626244	0.999880997596556	-4.56236063781404
Q07960	ARHGAP1	0.118878015641214	3.32012206755032	2.03703387671058	0.0868232979700842	0.999880997596556	-4.56425285029124
Q5VU97-1	CACHD1	-0.112202985012773	3.3382363798676	-1.57199330855281	0.165988512958121	0.999880997596556	-4.56450799659254
Q9UK99	FBXO3	0.0478289093789909	3.32077735511667	2.04822083954019	0.0854767470769447	0.999880997596556	-4.56621185602669
O43181	NDUFS4	-0.059393004222394	3.29805606563288	-1.76705655659007	0.126614523615092	0.999880997596556	-4.56814159576107
Q96EU7	C1GALT1C1	0.106819568421913	3.32167571794383	1.42296415114272	0.203606100025912	0.999880997596556	-4.5686919642503
Q9NQR1-1	SETD8; KMT5A	-0.160393428780562	3.32742183318127	-1.37072656920268	0.218550539228023	0.999880997596556	-4.57067597978079
Q9H2V7	SPNS1	0.09363817104355	3.33340845583251	1.45196739202798	0.195717376176187	0.999880997596556	-4.57213299749313
O43298	ZBTB43	-0.100854049159946	3.32101027568852	-1.58712772268277	0.162556219335172	0.999880997596556	-4.57275950992621
Q9H0D6-1	XRN2	0.0487632434790127	3.31417221284269	2.52204135792033	0.0443571106270743	0.999880997596556	-4.57286734362811
Q96HJ9-1	C7orf55; FMC1; C7orf55-LUC7L2	-0.102920393356541	3.31408742442208	-1.50785139958057	0.18130669381335	0.999880997596556	-4.57292318134991
Q8N4S0	CCDC82	-0.0528094386450173	3.32516312808947	-1.8913851839087	0.106432249185101	0.999880997596556	-4.57309152125954
Q8NFF5	FLAD1	0.0515576883529298	3.32835237685881	2.01942501457294	0.0889864177085667	0.999880997596556	-4.57312930736521
O75629	CREG1	-0.0864870641993041	3.33717216283174	-1.57730176496542	0.164776893535797	0.999880997596556	-4.57408759909439
Q13444	ADAM15	0.123804435331264	3.34029536692256	1.67944326303102	0.143038368624052	0.999880997596556	-4.57585528759497
Q92585	MAML1	-0.0698903637470546	3.30770570251884	-1.88433077592768	0.107487093970763	0.999880997596556	-4.57614999299175
Q96BQ5	CCDC127	0.13867885201261	3.32872008043776	1.46575752903426	0.192066022675763	0.999880997596556	-4.57633193758361
Q13404-1	TMEM189-UBE2V1; UBE2V1	-0.0693309853768834	3.33449991711988	-2.05337284051751	0.0848637389003698	0.999880997596556	-4.57733234232941
P57071	PRDM15	-0.0855379510547935	3.31727431883835	-1.5072161768158	0.18146480937402	0.999880997596556	-4.57940968684154
Q9BSY4-2	CHCHD5	0.104224694605728	3.31833470266352	1.43884607069877	0.199250883382889	0.999880997596556	-4.57944524939306
Q9Y3D5	MRPS18C	-0.0939545764292686	3.28083226629629	-1.49210526200656	0.18526418995129	0.999880997596556	-4.58204133353765
O95568	METTL18	0.0579491493102893	3.31618130740483	1.79863437899841	0.121157520490239	0.999880997596556	-4.58407280533606
Q8N4P2	TTC30B	0.205129725010173	3.32439031554103	1.41065486556359	0.207041329121695	0.999880997596556	-4.58447142785954
Q8IX03-2	WWC1	0.062210756526657	3.33162330902536	1.84248004775233	0.113961532607056	0.999880997596556	-4.58496837503031
P63098	PPP3R1	0.153544301270453	3.32814677254531	1.8031408788285	0.120397778001286	0.999880997596556	-4.585897758037
C9JLR9	C11orf95	-0.0871268880469994	3.32018018320416	-1.50804978726482	0.181257338751575	0.999880997596556	-4.5860666385465
Q9UJV9	DDX41	0.0422818588581917	3.31862433762045	2.30556868728864	0.0597437038025823	0.999880997596556	-4.5865847881966
P11117	ACP2	0.0586129322558381	3.31984633839404	1.77169342252358	0.125798417680189	0.999880997596556	-4.58916896622769
Q96A23-2	CPNE4	0.0945238273148849	3.32902270381079	1.89583870509572	0.105771617050821	0.999880997596556	-4.58917186712124
Q6IQ26	DENND5A	0.0692902540005659	3.32384638024426	1.69622333719539	0.139740887649712	0.999880997596556	-4.59095251573667
O75340	PDCD6	0.138641791422911	3.33544166212279	1.8120913583233	0.118902678283059	0.999880997596556	-4.59224903611912
Q6PIL6-5	KCNIP4	0.33822301897637	3.34193470217265	1.46093193977593	0.193336534064175	0.999880997596556	-4.593732880938
Q5SQ80	ANKRD20A2	-0.0724888040035801	3.33908395801706	-1.56636914990102	0.167281365322153	0.999880997596556	-4.59511001476968
P84074	HPCA	0.165023900201971	3.29796238112179	1.43328165062884	0.20076697218752	0.999880997596556	-4.59523083316357
P17010-3	ZFX	-0.22552301471288	3.29861317999222	-1.36109717046741	0.221411454188805	0.999880997596556	-4.59544905345032
O15085-2	ARHGEF11	0.0972924166498279	3.32272925812524	1.516712617686	0.179114372927526	0.999880997596556	-4.59722962410421
Q9BQT9-2	CLSTN3	0.134498036259103	3.32200994850836	1.50327635976951	0.182448356730548	0.999880997596556	-4.59829942442588
Q9UKJ5	CHIC2	0.150827946520148	3.27981312866959	1.40796469031019	0.20779910077692	0.999880997596556	-4.59875615578915
Q7L273	KCTD9	-0.110216460259646	3.305138401777	-1.50565198584759	0.181854705738988	0.999880997596556	-4.59950746048582
Q07866-6	KLC1	-0.204904314347486	3.31043885117265	-1.53349078637777	0.175031043761863	0.999880997596556	-4.60038702320722
O94888	UBXN7	0.0796686462916079	3.32056491801367	2.218773169846	0.0673891684316022	0.999880997596556	-4.60060692883027
Q9HAR2-4	LPHN3; ADGRL3	-0.104266738683447	3.33378178633241	-1.65229312670364	0.148532844532438	0.999880997596556	-4.60084242390015
P62380	TBPL1	0.14467416001525	3.32862381141932	1.44853580515799	0.19663587751103	0.999880997596556	-4.60200393534957
Q8TAP9	MPLKIP	-0.102501225438059	3.33039995574974	-1.35391530609554	0.223567118477764	0.999880997596556	-4.60219079123536
Q8WY41	NANOS1	0.194918857796544	3.31264759691267	1.42810541475493	0.20218678432834	0.999880997596556	-4.60240377874754
P22466	GAL	0.103866200809109	3.33760906085031	1.36041020011839	0.221616838754337	0.999880997596556	-4.60469021674036
Q9NVX0	HAUS2	0.12090619627973	3.34530643919924	1.91298085851005	0.103266607517902	0.999880997596556	-4.60483127262241
Q96GL9	FAM163A	0.173748691973247	3.27757700678038	1.17668758827251	0.283000188728903	0.999880997596556	-4.60513945269218
Q9H9L7	AKIRIN1	-0.118491049733427	3.33115699682547	-1.24041845641238	0.260206972336446	0.999880997596556	-4.60578376797147
Q8NG08	HELB	0.0692388428724827	3.31087930781345	1.98365509566692	0.0935492985003468	0.999880997596556	-4.60746609853682
Q9H8N7	ZNF395	0.135805962490063	3.32184221784425	1.17727510898635	0.282782485307581	0.999880997596556	-4.60790351817405
Q9BWP8-10	COLEC11	0.115298094290947	3.32000859592941	1.49274888285315	0.185100865460337	0.999880997596556	-4.61048904778541
Q9BXK1	KLF16	-0.100908844125117	3.32619214763835	-1.58356067380258	0.163359080406034	0.999880997596556	-4.61055600792825
P11940-1	PABPC1	-0.0472571500864182	3.32386489724493	-2.11249208973564	0.0781406580316467	0.999880997596556	-4.61245099307073
Q9Y3M8-1	STARD13	-0.0823233030620516	3.33399960444099	-1.45963297557556	0.193679856033319	0.999880997596556	-4.61388266802202
P00492	HPRT1	0.0490042064927269	3.32949623364894	2.1268359138136	0.0765928015205669	0.999880997596556	-4.61664396485906
Q9UDY8	MALT1	0.069092148182948	3.32108524728618	1.87705071204083	0.108586562347323	0.999880997596556	-4.61830451791912
P78560	CRADD	0.0873264743685865	3.34387136353613	1.54736205951759	0.17172120474544	0.999880997596556	-4.61835577978502
O14681	EI24	-0.165721666144077	3.27805873638718	-1.29524615623812	0.241892577889078	0.999880997596556	-4.62111580842509
Q8N5I4	DHRSX	-0.120778895898665	3.34710162397676	-1.24929295758576	0.257162667850964	0.999880997596556	-4.62201611692499
Q9UEG4	ZNF629	-0.0877675958766443	3.32271693590538	-1.99546053058008	0.0920179062009611	0.999880997596556	-4.62290796214663
Q9Y3C7	MED31	0.0936616889664863	3.34202867215682	1.61337155840552	0.156763346918488	0.999880997596556	-4.62405087130632
O14734	ACOT8	0.0770946173310563	3.33644145890197	1.63190076957599	0.152792202381794	0.999880997596556	-4.62444063531919
Q8NC44	FAM134A; RETREG2	-0.138098094852273	3.30838439932463	-1.31064487137497	0.23695767897421	0.999880997596556	-4.62454175485539
Q9P2F5-1	STOX2	-0.0778392579625548	3.31189973510153	-1.44426068453409	0.197785707427572	0.999880997596556	-4.62520750510057
Q5HYI8	RABL3	-0.1034445249114	3.33501525281276	-1.79003151939105	0.122620939128079	0.999880997596556	-4.62547338707582
Q9BRA2	TXNDC17	0.0813563924368243	3.32267705259854	1.87643931825862	0.108679404032766	0.999880997596556	-4.62883615324515
Q9H6N6	MYH16	0.269351050553098	3.32567403768018	0.77155726697418	0.46907768420569	0.999880997596556	-4.62966293985075
Q86YA3-1	C4orf21; ZGRF1	-0.0593493469057396	3.32943505426555	-2.03234510098702	0.0873940370204648	0.999880997596556	-4.63115564409057
Q5U5Q3	MEX3C	0.130472995413244	3.32197156943292	1.32181878494952	0.233432917292231	0.999880997596556	-4.63240867730485
Q13105-2	ZBTB17	-0.138724809539371	3.33429128210278	-1.56071293034192	0.168591163962842	0.999880997596556	-4.63303064473139
Q6PHR2-1	ULK3	0.0938312682972571	3.33103683294311	1.76094587378002	0.12769792565364	0.999880997596556	-4.63420732668375
P51693-2	APLP1	0.0790487643117139	3.31135772862872	1.42462801196287	0.203145773889864	0.999880997596556	-4.63430744957002
Q92979	EMG1	0.148695668142192	3.34990443507978	2.17271252201516	0.0718492652185787	0.999880997596556	-4.63443706642552
Q9H299	SH3BGRL3	0.0708439530395362	3.32756807424294	1.76864667819533	0.126334075286551	0.999880997596556	-4.63673481679151
P49588	AARS	0.0215161922234227	3.32137998583547	2.68698399284748	0.0354617646099967	0.999880997596556	-4.63705940441679
Q9UBL3-1	ASH2L	-0.063956998175962	3.32414670633717	-2.20814268241108	0.0683926138245551	0.999880997596556	-4.63725829179532
Q96S21	RAB40C	0.127006089083919	3.32557680223074	1.1147467689799	0.306762698363419	0.999880997596556	-4.63826459855164
Q15776	ZKSCAN8; ZNF192	-0.196425316429508	3.33280857163658	-1.6992598858904	0.139152060178536	0.999880997596556	-4.64014186426231
Q5W0Q7	USPL1	-0.070162456754324	3.31884217837739	-1.67031440471978	0.144863645866594	0.999880997596556	-4.64088427138674
P49247	LOC101060545; RPIA	0.0591261644433707	3.32476699810942	1.78569360440569	0.12336541014402	0.999880997596556	-4.64115790981171
Q8IV50	LYSMD2	-0.142673618597835	3.31376395477208	-1.50013896936603	0.183235132521038	0.999880997596556	-4.6423209634655
Q9UHQ1-2	NARF	-0.125085402294569	3.31786219973318	-1.95802243213683	0.0969630618151169	0.999880997596556	-4.64339907349791
Q6PI77	BHLHB9; ARMCX5-GPRASP2	-0.123098098123776	3.29831516737635	-1.10794003305225	0.309473126797569	0.999880997596556	-4.64378349177436
Q9GZU3	TMEM39B	0.175577055030881	3.29841080071085	1.07264149158876	0.323849198484075	0.999880997596556	-4.64380338669519
Q9Y265	RUVBL1	-0.085488070190968	3.31341068898862	-2.45746845450934	0.0484565272921815	0.999880997596556	-4.64510717259367
Q9BSR8	YIPF4	0.124884060967817	3.30824855411806	1.51995874924478	0.178317471842131	0.999880997596556	-4.64563307436087
Q02410	APBA1	-0.09264952685858	3.32040272915686	-1.27666359414087	0.247968686471621	0.999880997596556	-4.65038054112701
Q8WUE5	CXorf48; CT55	0.0802997940382773	3.32389468654203	1.69176087373777	0.140610586529247	0.999880997596556	-4.65039174368352
Q9HB07	C12orf10	0.0798263753197355	3.35044093898681	2.03968205413345	0.0865026163927833	0.999880997596556	-4.65071218717338
Q9BUL9	RPP25	0.100228117654067	3.34264494766062	1.61386278304145	0.156656811179581	0.999880997596556	-4.65088716157657
P41134	ID1	0.104380007030108	3.33936660300558	1.19125109344159	0.277645731946035	0.999880997596556	-4.6513153141861
O95777	NAA38; LSM8	0.059636250610461	3.33639909165685	1.81571762774501	0.118302148149141	0.999880997596556	-4.65145311523378
Q86UY6	NAA40	0.0829092675330833	3.32761261256626	1.66612839756482	0.145708091325373	0.999880997596556	-4.65330370872234
Q9NWB1-2	RBFOX1	-0.113030309510659	3.32187893384615	-1.22309551072269	0.26623982506877	0.999880997596556	-4.65380657523393
Q9H2G4	TSPYL2	-0.175263814784232	3.33676372749103	-1.04905274304713	0.333758406492673	0.999880997596556	-4.65603366935859
Q5JUR7	TEX30	0.0609605061225088	3.32753005365607	1.87771796230912	0.108485328474028	0.999880997596556	-4.65649009786382
O14737	PDCD5	0.0548314581847342	3.3210941001922	1.9841511070059	0.0934844435329805	0.999880997596556	-4.6566608407538
Q9C0D4	ZNF518B	0.138709382292347	3.35534184976691	1.02481545274468	0.344195022304407	0.999880997596556	-4.65717881555724
Q9UKN8	GTF3C4	0.0552496387073964	3.32180787744252	2.45155796005029	0.0488511432156305	0.999880997596556	-4.65723339681782
Q9Y253-1	POLH	-0.0819865628975903	3.32915463123203	-1.40404371284429	0.208908093025923	0.999880997596556	-4.65903603110933
Q9P2X3	IMPACT	0.109502684860677	3.32898000104376	1.65222481363154	0.148546921492616	0.999880997596556	-4.66019577344972
Q13601	KRR1	-0.119925300086253	3.31935846351086	-1.86331238435371	0.110691848809967	0.999880997596556	-4.66162536160036
Q6NZI2-1	PTRF; CAVIN1	0.1320390576722	3.33515607500843	1.07043757274108	0.324764718320843	0.999880997596556	-4.66175864782882
Q8IUX4-1	APOBEC3F	0.123920739727776	3.3336622800351	1.15639782974629	0.290606455037044	0.999880997596556	-4.66188560934761
O95057	DIRAS1	0.134405688389226	3.2941953454623	1.10542948384047	0.310477837600947	0.999880997596556	-4.66257378495978
Q63HQ0	AP1AR	0.0762259352035997	3.33084907876576	1.47737046138536	0.189040057390357	0.999880997596556	-4.66310133801829
Q9UQ88-1	CDK11A	0.166923416985387	3.33790938592079	1.08922323182288	0.317028801981197	0.999880997596556	-4.66513318145247
Q7Z340	ZNF551	0.241142449603587	3.25189704369788	0.658892280380767	0.533928327856833	0.999880997596556	-4.66548138091455
O75716	STK16	0.114659150478105	3.30920652170307	1.20519559998959	0.272600416795209	0.999880997596556	-4.66666363269742
Q6ZN54	DEF8	0.0768350279176923	3.30398994135043	1.70577464970707	0.137896838402398	0.999880997596556	-4.66698461637556
P23142	FBLN1	-0.176656521576728	3.33080028071859	-1.39827284939862	0.21055010135256	0.999880997596556	-4.66703549010324
P24863-1	CCNC	0.101887136839986	3.333344376876	1.55032657833419	0.171021503279299	0.999880997596556	-4.66772369240551
O60218	AKR1B10	-0.111657487164786	3.32130850337513	-1.37127639877056	0.218388194826108	0.999880997596556	-4.66809398397777
Q6PJG2	ELMSAN1	-0.0735673798171025	3.31299683356793	-1.9906560811951	0.0926380699983639	0.999880997596556	-4.66925319185077
Q9NYM9	BET1L	0.139040914075835	3.30747910650391	1.51775853704948	0.178857244962314	0.999880997596556	-4.66930537572748
P08235	NR3C2	-0.14767045531107	3.24574951555747	-0.713010094824351	0.502078241048	0.999880997596556	-4.66986160327775
Q5M7Z0	RNFT1	-0.13235824208279	3.34783746763131	-0.982458001903699	0.363061046708785	0.999880997596556	-4.67025227515765
Q2LD37-1	KIAA1109	-0.193357614802644	3.32008681325802	-0.943475002602463	0.381135708312249	0.999880997596556	-4.67111052874958
Q14181	POLA2	0.0453085103238468	3.32508096053345	2.03748127113747	0.0867690363858592	0.999880997596556	-4.67237116495664
Q15063-1	POSTN	-0.163305199234231	3.38730467625913	-1.33359010477567	0.229770325595697	0.999880997596556	-4.67389453429678
Q92934	BAD	-0.0911783728716788	3.30264547537501	-1.48172241641475	0.187917486555029	0.999880997596556	-4.67476345468808
Q10469	MGAT2	0.10258821070315	3.31734278900561	1.83504238649751	0.115151850398736	0.999880997596556	-4.6752762471535
P51956	NEK3	0.0915119539505101	3.3304584598048	1.78690713736064	0.1231566993424	0.999880997596556	-4.67576935571683
P15291	B4GALT1	-0.145123071819995	3.33233294257193	-0.975794005122694	0.366102314107338	0.999880997596556	-4.67588201617332
Q96EK2-3	PHF21B	-0.124463426666581	3.34457074689236	-1.1085135499626	0.309243987442519	0.999880997596556	-4.67606094982221
Q969X0	RILPL2	0.129880876735431	3.33695468617586	1.08536967368666	0.318603201220044	0.999880997596556	-4.67637432091391
Q14202	ZMYM3	-0.0520557837838293	3.32385852361087	-2.20973832809478	0.0682410206439093	0.999880997596556	-4.67659061998025
O75955	FLOT1	0.0625719695985751	3.31117989986941	2.16489334736692	0.072635971858886	0.999880997596556	-4.67855825981229
Q9UHB4-2	NDOR1	0.110884823566794	3.33014508144606	1.49295971655687	0.185047393636763	0.999880997596556	-4.67862681973522
Q9NVD3	SETD4	0.333107866264415	3.30515329176152	0.876791465965929	0.413650399220087	0.999880997596556	-4.67886143347613
Q8IUX7	AEBP1	0.153105494326426	3.35720362023367	0.742227142145507	0.485418541889569	0.999880997596556	-4.67919466274785
O43933	PEX1	0.0440817260567267	3.32203737462949	1.94505787284658	0.0987369562168269	0.999880997596556	-4.67969269851885
Q8WXX5	DNAJC9	0.0545200986642004	3.32061954245698	2.24982080645888	0.06454441429229	0.999880997596556	-4.68027919938375
Q8IUG5-1	MYO18B	-0.0499655496855769	3.39246271414673	-0.177433721364568	0.864888281604012	0.999880997596556	-4.68040617386116
O14907	TAX1BP3	0.11393321197707	3.32229684419635	1.56502289927794	0.167592240756608	0.999880997596556	-4.6810042878398
Q9H6J7-2	C11orf49	0.0955131331841557	3.34311829396071	1.2939713724424	0.242305164897519	0.999880997596556	-4.68163374921697
Q8N1S5-1	SLC39A11	-0.180329766631493	3.3370716665222	-0.904658657970595	0.399816512030639	0.999880997596556	-4.68223635318875
P84085	ARF5	0.0748529330247565	3.31013442096217	1.92075609300869	0.102149964083363	0.999880997596556	-4.68344294199207
Q9UNL4-1	ING4	-0.155130791573122	3.31462381351583	-1.56179927227096	0.168338854381985	0.999880997596556	-4.68404889347657
Q02535	ID3	0.0906843033907536	3.30484093255891	1.34196214602758	0.227196752095701	0.999880997596556	-4.68554352116589
Q8NDX6	ZNF740	-0.079870788376775	3.30902571116906	-1.62443444841006	0.154380692388326	0.999880997596556	-4.68597936258984
P17014-1	ZNF12	-0.172979914568639	3.33106873977045	-1.03917695559508	0.337979611982023	0.999880997596556	-4.6867807166133
Q9NTX5	ECHDC1	-0.0832658414999624	3.31320609928538	-1.5907630007153	0.161741847336537	0.999880997596556	-4.68730368692438
O94850	DDN	-0.123738858923996	3.34045586211509	-1.04535810652194	0.335332572619342	0.999880997596556	-4.68828876942444
P55212	CASP6	0.0860529133495986	3.34048100496	1.63616958469576	0.151891019122746	0.999880997596556	-4.68830380028817
P15882	CHN1	0.0585582187966199	3.33919800763784	2.0442765955677	0.0859490789106933	0.999880997596556	-4.68889205728419
Q8WXB1-1	METTL21A	-0.125342142084634	3.29299725511422	-1.54108947501506	0.173210569559329	0.999880997596556	-4.68908527026196
Q9H2C2	ARV1	-0.15415386130646	3.32988525840596	-1.21609430039966	0.268712222912342	0.999880997596556	-4.68953523014833
P56181-2	NDUFV3	-0.0654333117959653	3.28970056216343	-1.86950300660519	0.109738227131225	0.999880997596556	-4.68967794506657
Q5T6F0	DCAF12	-0.0715770029270392	3.33153009997039	-1.53679520210496	0.17423718647748	0.999880997596556	-4.69166521732295
Q53HC5	KLHL26	0.0862866466172077	3.33095111985046	1.47019096209808	0.190905562284557	0.999880997596556	-4.69176380432245
P36406-1	TRIM23	-0.0422742710945902	3.33558742058397	-0.161804129867166	0.876664062990656	0.999880997596556	-4.69399501579088
Q9P243-1	ZFAT	-0.105441782688589	3.33510641431946	-1.33197036997009	0.230271234022249	0.999880997596556	-4.69422712373654
Q9BSV6	TSEN34	0.0903186904617745	3.32507644285987	1.66239851884064	0.146464504288908	0.999880997596556	-4.69427364100772
O75094-1	SLIT3	-0.0412798982349512	3.31623891728972	-2.10493030767195	0.0789694557990635	0.999880997596556	-4.69508026203357
O95198-2	KLHL2	-0.126974970609488	3.32858124938218	-0.975399789439325	0.366282848927567	0.999880997596556	-4.69641626521619
Q9NRF9	POLE3	0.160555244323159	3.33504436789233	1.39052350713748	0.212773509864978	0.999880997596556	-4.6970969024322
Q96AT9	RPE	0.0641484413272404	3.32163018185048	1.62138677701553	0.155033613889167	0.999880997596556	-4.69759338884249
Q9BVG4	CXorf26; PBDC1	0.0720835881093018	3.3237832586827	1.99225914524576	0.0924306786340508	0.999880997596556	-4.69824752877029
Q8TAD4-1	SLC30A5	0.159637687204182	3.28176022246414	1.42211758079199	0.203840679436389	0.999880997596556	-4.69856882928909
O43156	TTI1	0.0842442154304034	3.32204923946666	2.0671472449402	0.0832465800822272	0.999880997596556	-4.6994768033074
Q9ULL5-3	PRR12	-0.0441692780521372	3.31742982271405	-2.11805288083588	0.0775368361262201	0.999880997596556	-4.69978033786163
P12277	CKB	-0.0511723115579945	3.32638973771529	-2.58805916688107	0.0405418524073561	0.999880997596556	-4.7006738654991
P12110	COL6A2	-0.0991748140205546	3.32093590427596	-1.36578542887072	0.220014371128942	0.999880997596556	-4.70169190643548
Q9BZJ0	CRNKL1	0.0530476011162913	3.31798207979136	2.21341802146692	0.0678927502381968	0.999880997596556	-4.70479498217558
Q9HCJ0-2	TNRC6C	-0.0511884766648826	3.32129244700392	-1.9815835920512	0.0938206428654816	0.999880997596556	-4.70486161135933
P60228	EIF3E	0.0427046544323057	3.32053691119161	2.34940346559529	0.0562296857132083	0.999880997596556	-4.70512588085375
E7ETH6	ZNF587B	-0.0845994014376334	3.33353952594544	-1.33697041924056	0.228728089585438	0.999880997596556	-4.70521166247734
Q9BS16	CENPK	0.135931554549493	3.31619782357294	1.73651426636684	0.132120552179828	0.999880997596556	-4.70563881808792
Q6ZSZ6	TSHZ1	0.00935821029742422	3.31884634615588	0.0398182119262366	0.969503827720143	0.999880997596556	-4.70590886610212
O00743	PPP6C	0.0903489432730791	3.35955459465104	2.11982585364032	0.0773453186349052	0.999880997596556	-4.7061376197441
Q86YJ7-1	ANKRD13B	-0.115394932993432	3.33586885417435	-1.45496798625093	0.19491747385362	0.999880997596556	-4.70721491881633
P11362-21	FGFR1	-0.0746787887049042	3.31672595003779	-0.346617150447913	0.740472845097271	0.999880997596556	-4.70728259537985
Q8NFZ4	NLGN2	0.0817442294550902	3.28614481739692	0.384772231718779	0.713407744145085	0.999880997596556	-4.7081261875102
O75884-1	RBBP9	0.0620964421145774	3.34027202167403	1.83317146163112	0.115453197004042	0.999880997596556	-4.70840032134021
Q8IYN2	TCEAL8	0.173231415870079	3.31406139019019	1.40396940784441	0.208929161073105	0.999880997596556	-4.71001643918206
Q969W3-2	FAM104A	-0.122783337177755	3.358577340617	-0.823298884956131	0.441196470376316	0.999880997596556	-4.71023559312813
Q9Y426	C2CD2	-0.11846942348011	3.30623338833455	-0.937725708819659	0.383859492405812	0.999880997596556	-4.71064853613332
Q9Y2G7	ZFP30	-0.135364021413143	3.30469920957479	-1.53069673363949	0.175704934333797	0.999880997596556	-4.71073877425197
Q96M11	HYLS1	0.00738031423893957	3.35407449723671	0.0301135060067183	0.976933482938065	0.999880997596556	-4.71082553855535
P53778	MAPK12	0.0632146521317948	3.32620035242781	1.70323223334979	0.138385386773086	0.999880997596556	-4.71127788564249
O75914-3	PAK3	-0.0900318876984307	3.32509199875153	-1.41175729031615	0.206731525351323	0.999880997596556	-4.71237451667194
Q8WUU4	ZNF296	0.0399268245546897	3.36103589533252	0.180080958529828	0.862897426975607	0.999880997596556	-4.71270263775486
Q96GF1-1	RNF185	-0.174200534669265	3.30081138491829	-1.01144700122759	0.350062878739046	0.999880997596556	-4.71339650181855
P08253	MMP2	0.0864575047783255	3.30422094815966	1.44324445225736	0.19805993954512	0.999880997596556	-4.71497814230311
Q9BT43	POLR3GL; LOC101060555	-0.128848942361368	3.30586868292847	-1.12624084896508	0.302230728507854	0.999880997596556	-4.71505621955336
Q99418	CYTH2	0.0917496467368676	3.32393064892234	1.27838413548269	0.247400508267219	0.999880997596556	-4.71557885459265
P55283	CDH4	-0.128481404257513	3.30541218113562	-0.858657768959618	0.42284235581341	0.999880997596556	-4.71575678021051
O60779	SLC19A2	-0.192977144487747	3.29343182813002	-1.17535155929335	0.283495780687873	0.999880997596556	-4.71887297487703
Q02818	NUCB1	0.0495942693693256	3.32072886698533	2.15275981255698	0.0738742661693148	0.999880997596556	-4.71917530246836
P56178	DLX5	0.106899424340166	3.32340234947806	0.965965175213709	0.370624391972621	0.999880997596556	-4.71994421067371
Q15269	PWP2; LOC102724159	0.0671615871873236	3.3240215291009	2.17580457471442	0.0715405806372527	0.999880997596556	-4.7214024534546
P43251-2	BTD	-0.115957903652524	3.35683906624363	-0.645848735132834	0.541794488807661	0.999880997596556	-4.72240764894339
Q5CZA5	ZNF805	-0.121725562344787	3.3314661357259	-0.894951774495352	0.404595090320266	0.999880997596556	-4.72253027062131
Q9H773	DCTPP1	0.0622921281202769	3.32743241524976	1.75852450900415	0.128129722456156	0.999880997596556	-4.72253610734289
Q9NV56	MRGBP	-0.0738223792717686	3.32218190331736	-1.51058268853894	0.180628301303291	0.999880997596556	-4.72356333094117
P52701	MSH6	0.0384962786121408	3.32292935450963	2.56775772565282	0.0416767537643379	0.999880997596556	-4.7240260063076
Q9NP66	HMG20A	0.0834137070534044	3.31480606828968	1.69295173325557	0.140377987733532	0.999880997596556	-4.72428622965281
Q96G61	NUDT11	0.0543919975789051	3.32877151890057	1.58178852398689	0.163759344956574	0.999880997596556	-4.72508151972185
Q13705-1	ACVR2B	0.0879314485708346	3.31591650667659	1.66737172381553	0.145456781855609	0.999880997596556	-4.72633369369865
Q8N1G0	ZNF687	-0.0769561537236085	3.31828964925847	-2.05987893562012	0.0840959720600702	0.999880997596556	-4.72649433605848
Q86V85	GPR180	-0.144346215018532	3.3267595237358	-1.27701813114021	0.247851513079869	0.999880997596556	-4.72661414859548
O95201	ZNF205	-0.102532690249433	3.32653122756746	-1.14317391801396	0.295656496688745	0.999880997596556	-4.72695688658006
Q5FWF5-1	ESCO1	-0.0747594095136094	3.34186800607472	-1.68839122197595	0.141270763533163	0.999880997596556	-4.72730918055662
Q9UHF7-2	TRPS1	-0.0466350816772503	3.32277313591554	-1.87271257625701	0.109247023616438	0.999880997596556	-4.72788127060026
O14713-1	ITGB1BP1	0.10832811255667	3.35872845556049	0.652113657889125	0.538007220985478	0.999880997596556	-4.72936567302126
Q96MD2	C12orf66	-0.0994092345438782	3.31985367253481	-1.4380974188371	0.199454248532018	0.999880997596556	-4.72980390069503
P51798-1	CLCN7	0.10447989791466	3.33028289166882	1.57228372015966	0.165922011426286	0.999880997596556	-4.73078987998057
O95502	NPTXR	-0.150151776941258	3.30777360275649	-1.36170829358453	0.22122888989049	0.999880997596556	-4.7309367050153
P21802-11	FGFR2	-0.0922692744646215	3.34092534038012	-0.448771681340295	0.669031860787936	0.999880997596556	-4.73135086097734
Q8IYU2-1	HACE1	0.0711255428409185	3.3239368580002	1.55705628706259	0.1694430622554	0.999880997596556	-4.73190071929517
Q96GD3	SCMH1	0.114767840558335	3.33081565145228	1.5001875239266	0.183222932278733	0.999880997596556	-4.73203935553366
Q8ND23-1	LRRC16B; CARMIL3	0.0981827706804173	3.32915260785277	0.953937779796519	0.376217251566914	0.999880997596556	-4.73257268635196
O60551	NMT2	0.102478285089879	3.33196785303019	1.50235575442962	0.182678893906813	0.999880997596556	-4.73377012756905
Q8IY45	AMN1	0.0623289780425901	3.32290118569277	1.63192733959759	0.152786577461134	0.999880997596556	-4.7340544584972
P0C7X2-1	ZNF688	-0.0839614758657673	3.32799375487401	-1.22770451438849	0.264622974757621	0.999880997596556	-4.73423285312922
Q9BW83-1	IFT27	0.0611257857390339	3.32384218409711	1.53084641751704	0.175668770923891	0.999880997596556	-4.73523797869923
Q96EN9-1	C19orf60; REX1BD	0.0496537959251371	3.32736283674586	0.240556996055567	0.817745511559436	0.999880997596556	-4.73587804918384
Q8NHS3	MFSD8	0.190200344016611	3.26788755959105	0.789704386279549	0.459161074081928	0.999880997596556	-4.73799573265658
Q14157-5	UBAP2L	-0.0584388302414829	3.30807731809032	-1.60767233702214	0.158004431855263	0.999880997596556	-4.73903655312107
Q5U5X8	FAM222A	-0.105579540979229	3.35654952066416	-1.08462775483286	0.318907056262079	0.999880997596556	-4.73911959352392
Q8WTP8-2	AEN	-0.0678366785327078	3.34005859867571	-1.65527838496673	0.147918933465392	0.999880997596556	-4.73943473986963
Q9UFN0	NIPSNAP3A	0.107957109594683	3.32679838473255	1.42217287961946	0.203825348931465	0.999880997596556	-4.73947376520188
P02452	COL1A1	-0.231458449780116	3.29732540492726	-0.611994651381847	0.562547533933457	0.999880997596556	-4.74293321793126
P25098	ADRBK1; GRK2	0.112157567321537	3.31776017728427	1.84125498469792	0.114156752231426	0.999880997596556	-4.7438152935542
Q8N3Z6	ZCCHC7	-0.0593260939787102	3.30961423526726	-1.84502304500928	0.11355734537276	0.999880997596556	-4.74394168653406
Q8N1B4	VPS52	0.0496632958247692	3.33142792054511	1.86149252597225	0.110973742415694	0.999880997596556	-4.74441311297014
Q96BY9	TMEM66; SARAF	-0.133168304965462	3.29204377980891	-1.22354898054476	0.266080368142244	0.999880997596556	-4.74490039498342
P55210-3	CASP7	0.0837881190178839	3.33375411966935	1.74783408265383	0.130053196810285	0.999880997596556	-4.74745815574716
P31629	HIVEP2	-0.110686284363472	3.30841708202429	-0.641147525846666	0.544647449657429	0.999880997596556	-4.74796889356752
Q08629	SPOCK1	-0.0713232534039878	3.30221964553043	-1.41851972927885	0.204840380880182	0.999880997596556	-4.74834032770101
Q9UK33	ZNF580	-0.0948424522416124	3.34301460120751	-1.29007261001868	0.243570873230088	0.999880997596556	-4.74834741220308
Q8N8J6-2	ZNF615	-0.124689985181812	3.27274213847574	-0.744277033198107	0.484263948401958	0.999880997596556	-4.74844922368599
Q96HJ3-1	CCDC34	0.0846145146658959	3.32394092039358	1.12992885886744	0.300788514727912	0.999880997596556	-4.74848950425408
Q3KP66-1	C1orf106	0.0829455652152805	3.3190874672536	1.37642805900183	0.216872383392217	0.999880997596556	-4.74887955944735
Q96C34-1	RUNDC1	0.074644685213994	3.31588224836187	1.54147571428979	0.173118511431325	0.999880997596556	-4.74927404858301
P10746	UROS	0.0470619266455461	3.32589230504107	1.80880066537564	0.119450227747374	0.999880997596556	-4.75009103110381
O60307	MAST3	0.140132567917503	3.37289837962876	0.606475462941487	0.565976396892158	0.999880997596556	-4.7503133775222
A8CG34-1	POM121C	-0.278490643057381	3.24188416738243	-0.864704872450968	0.419760432978124	0.999880997596556	-4.75052013235277
Q86VP3-2	PACS2	0.137496360141518	3.33307069496658	1.16078086291254	0.28894880899092	0.999880997596556	-4.75180523784989
P52657	GTF2A2	0.0751103734203746	3.32666174548494	1.565525849878	0.167476035982527	0.999880997596556	-4.7518338927509
O15145	ARPC3	-0.0632806406155971	3.31967157462454	-1.92948796187946	0.100910283435936	0.999880997596556	-4.75191355152064
Q0P5N6	ARL16	0.136557752230023	3.3171581821321	1.01954259394439	0.34649996678831	0.999880997596556	-4.75197236149168
Q3B820-3	FAM161A	0.149950725292555	3.30265508897351	1.3935475783168	0.211903331517607	0.999880997596556	-4.75244567359805
Q17RY0-1	CPEB4	-0.0728349224415319	3.32927860442435	-1.76589594510582	0.126819603307551	0.999880997596556	-4.75250546193259
Q8IVS8	GLYCTK	0.0932212648620553	3.30115659567595	0.996265144675803	0.356823269352431	0.999880997596556	-4.75312818513552
Q9NXR5	ANKRD10	-0.107230327395647	3.30560126237929	-0.385588088505038	0.712833782512927	0.999880997596556	-4.75350205693527
Q719H9	KCTD1	-0.107937639168605	3.32959347131506	-1.33338928390301	0.229832377178092	0.999880997596556	-4.75367098251374
Q9P244	LRFN1	-0.0765425916843083	3.34002811251316	-0.486130944579788	0.643771212523948	0.999880997596556	-4.75400418047087
Q5TB30	DEPDC1	-0.0538787460943349	3.34038572848551	-0.26323043744054	0.801001462051068	0.999880997596556	-4.75420711001262
O15090	ZNF536	-0.0617566337484036	3.32289768429814	-1.68223897912157	0.142483818676609	0.999880997596556	-4.75457670643463
Q9P1Z2-1	CALCOCO1	0.0847979519905213	3.32214113734874	1.99656459872451	0.0918759831043787	0.999880997596556	-4.75508915871016
Q8TBZ8	ZNF564	0.103039065445693	3.3508273963855	0.718415482500572	0.4989675100488	0.999880997596556	-4.75667432675332
Q96BV0	ZNF775	-0.0459511919737913	3.36819793243703	-0.250340834030129	0.810506792595021	0.999880997596556	-4.75690217775852
P53779	MAPK10	-0.112140973961754	3.3189143926823	-1.29048587534942	0.243436433015126	0.999880997596556	-4.75739441742262
Q6PH81-1	C16orf87	0.0850020001500931	3.3352373010649	1.39706193679897	0.210896133851377	0.999880997596556	-4.75762170302912
Q15008	PSMD6	0.0478666976454046	3.31583521205869	2.26001602990266	0.0636375334501401	0.999880997596556	-4.7586757144317
Q9UBN1	CACNG4	0.133281268165956	3.30090284161689	1.22935074413868	0.264047539159488	0.999880997596556	-4.75876160361033
Q8N2I9-4	STK40	0.146201046813882	3.32001810654235	0.959519780795383	0.373613445376136	0.999880997596556	-4.75924631409293
P54136-1	RARS	0.0606140108135157	3.31647039539908	1.68120159940799	0.142689348187572	0.999880997596556	-4.76030233942083
P11234-2	RALB	-0.155690049357659	3.29878817619624	-1.30638506671269	0.238313823274468	0.999880997596556	-4.76127552485716
Q15777	MPPED2	-0.0902540470431127	3.33449664349621	-0.573204353038416	0.586911729957048	0.999880997596556	-4.76193320422208
Q6PI98-1	INO80C	-0.0834135352399682	3.33659938443067	-1.55601209839366	0.169687072881088	0.999880997596556	-4.76200640318647
Q96SI9	STRBP	0.0444223506257826	3.31580448693364	2.18458383852291	0.0706715248073826	0.999880997596556	-4.7627370441285
P08651	NFIC	-0.0905253934028424	3.31846739305673	-1.59165364786945	0.161542915729824	0.999880997596556	-4.7627984681947
Q13948-2	CUX1	0.108446034479601	3.30366279030229	0.594437773395278	0.573498651802934	0.999880997596556	-4.76300337517036
Q9H9A6	LRRC40	0.0700280365754141	3.32808816215609	2.11713808548157	0.0776358418716187	0.999880997596556	-4.76370942758388
O43296	ZNF264	-0.132797920132718	3.3309366376678	-1.3735726966777	0.217711359359648	0.999880997596556	-4.7637339958141
Q5TCZ1	SH3PXD2A	-0.0791301693089203	3.31835219949091	-2.03835302188778	0.0866634058349363	0.999880997596556	-4.76414791454979
Q92777-2	SYN2	-0.0664777117187908	3.32428515635351	-1.69672655888911	0.139643140154013	0.999880997596556	-4.76423655231294
P52630-3	STAT2	-0.0997902570079773	3.32442763657081	-1.86772753403594	0.110010890918149	0.999880997596556	-4.76570933883744
Q8N961-1	ABTB2	0.116931036337846	3.33172155441791	1.08617631896617	0.318273108037977	0.999880997596556	-4.76671419536083
Q9HCK0	ZBTB26	-0.0799804830795726	3.33143717632203	-1.34404372554447	0.226560893820552	0.999880997596556	-4.7674082941491
Q14119	VEZF1	-0.105774501845671	3.31315053472614	-1.55214876395081	0.170592752580348	0.999880997596556	-4.76821790251228
Q8NCN2	ZBTB34	-0.100114726720156	3.32583485881767	-1.4722495057941	0.19036894070523	0.999880997596556	-4.76852682975907
Q96EM0	L3HYPDH	0.0895409760757595	3.33555800101426	0.859715061476875	0.422302301952432	0.999880997596556	-4.76893032365724
Q12872-2	SFSWAP	-0.0409333902568757	3.31817329906903	-1.95449932533962	0.0974419342917556	0.999880997596556	-4.76933801325942
Q6PGN9-1	PSRC1	0.196633267666127	3.31177107273559	1.26456266779056	0.251997309189093	0.999880997596556	-4.76934765651804
Q01433-1	AMPD2	0.0448726677031496	3.32183746474908	2.12485807762448	0.0768043590051085	0.999880997596556	-4.77026625810864
Q9Y4C4	MFHAS1	0.112038585646584	3.34178391239074	1.08896574232633	0.317133800701896	0.999880997596556	-4.77036961915179
Q5VWQ8-1	DAB2IP	0.0445151473239663	3.31078091423813	1.89691521067733	0.105612541664026	0.999880997596556	-4.77037258415838
Q9UJK0	TSR3	0.137582691781656	3.31209927202689	0.950443561440569	0.377854345610774	0.999880997596556	-4.77070547541321
Q9H2S9	IKZF4	-0.0906861987079131	3.32789297904028	-0.986118191382999	0.361399122712209	0.999880997596556	-4.77098945791726
Q7Z3V4-1	UBE3B	0.0617917106348519	3.3256034438148	1.50437485158241	0.182173627918249	0.999880997596556	-4.77152121430346
P0CG12	CHTF8	-0.0729435548350363	3.32102012251084	-1.47401930804412	0.189908704108316	0.999880997596556	-4.77213502967259
Q08431	MFGE8	-0.156314724107076	3.33877237667162	-1.42744596189758	0.202368327547562	0.999880997596556	-4.77232573032446
Q8TF61	FBXO41	0.172923539213751	3.32031312262514	0.84179467479254	0.431524672849	0.999880997596556	-4.77238935853387
P62304	SNRPE	0.0672100879432134	3.34351649420603	1.77088183881849	0.125940887550908	0.999880997596556	-4.77336430467113
P30039	PBLD	-0.107603589662732	3.26137204596304	-0.846707473526974	0.428981846429416	0.999880997596556	-4.7736707089839
Q9BPU9	B9D2	0.0400375130655127	3.40395178296977	0.19676404859239	0.850376792693897	0.999880997596556	-4.77381028452789
Q92771	DDX12P	-0.00761719162341566	3.29049310218604	-0.0444706422803194	0.965943189060948	0.999880997596556	-4.77405624778855
O94941-1	UBOX5	-0.126917496270735	3.30634177325624	-1.3736785895068	0.217680193131466	0.999880997596556	-4.77440611943415
Q3V5L5-2	MGAT5B	0.0885454147547988	3.29867518276937	0.880654857788764	0.411711409165181	0.999880997596556	-4.77473181060614
P01023	A2M	-0.255139809583877	3.30269520997914	-1.62348584280386	0.154583636493717	0.999880997596556	-4.77476818433543
Q9H0E2	TOLLIP	-0.0552891872337659	3.32655892180897	-1.59732985261327	0.160280540282012	0.999880997596556	-4.77643190747125
Q9H6Y7	RNF167	0.0933309544268245	3.32606584556866	1.14492518778344	0.294983485326525	0.999880997596556	-4.77697428523981
A8MT69-1	STRA13; CENPX	0.0920097802977287	3.32287059215633	1.15967215397947	0.289367359641027	0.999880997596556	-4.77697943000087
O14526-1	FCHO1	-0.0787148896822811	3.31263328004595	-0.398510431664317	0.703770375857364	0.999880997596556	-4.77742239078983
Q86WZ6	ZNF227	-0.106001719525299	3.33401541877967	-1.32595000645619	0.232141614995561	0.999880997596556	-4.77784894118117
P19793	RXRA	0.0544808661102757	3.3190549971181	1.72953819870449	0.133410474243344	0.999880997596556	-4.77798403580798
Q15583	TGIF1	-0.0878561178686477	3.30470861589729	-0.994115079236917	0.357789008157145	0.999880997596556	-4.77835227380741
O94855-2	SEC24D	0.0444244962053247	3.3233096672521	2.07542174681097	0.0822901881586145	0.999880997596556	-4.77885987911027
Q9UHA4	LAMTOR3	-0.0859920675090444	3.34472661444748	-1.62341912253281	0.15459792015936	0.999880997596556	-4.77899904153439
Q9UQ49-2	NEU3	0.046106371755425	3.35130974069946	0.244305892868928	0.814969471220701	0.999880997596556	-4.77907785497502
Q9BV94-1	EDEM2; MMP24-AS1-EDEM2	0.0986800097291012	3.33551612772587	0.98171719516077	0.363398144939272	0.999880997596556	-4.77966484249354
Q9Y3A0-1	COQ4	0.0775283981550629	3.32236786511814	1.20528319249854	0.272568975329947	0.999880997596556	-4.78051270166802
Q9UDW1	UQCR10	0.17052943529453	3.29350745392954	1.3725704500077	0.218006538906597	0.999880997596556	-4.78073070219305
Q96DT7	ZBTB10	-0.0680453614731971	3.31988522966628	-1.83321120238095	0.115446787955936	0.999880997596556	-4.78093940255241
Q96JN0-3	LCOR	-0.101838753661247	3.33042176083123	-1.65199851250466	0.148593563457699	0.999880997596556	-4.78129192829182
P05937	CALB1	0.07971190553192	3.32549279327406	1.11177759777301	0.307942575783931	0.999880997596556	-4.78147889069499
Q8TCX1-2	DYNC2LI1	0.133696931979732	3.30933897110688	1.63844466579721	0.151412807181837	0.999880997596556	-4.78194771833449
P38936	CDKN1A	0.00226793788974926	3.3161978352958	0.0136267500111382	0.989560644249258	0.999880997596556	-4.78243174807433
Q9Y324	FCF1	0.0557377061515182	3.32260924659783	1.61026257228346	0.157439217818093	0.999880997596556	-4.78272006085929
Q9UIJ7-1	AK3	-0.103484213376938	3.30681630904065	-1.99032073159962	0.0926815139575996	0.999880997596556	-4.78278253583643
Q9UKT7	FBXL3	0.0709719592671509	3.34284066891423	1.38106564812862	0.21551597438465	0.999880997596556	-4.78379906293811
Q96F44-1	TRIM11	0.0706109855457022	3.32658223631269	1.74228130358531	0.131063346627152	0.999880997596556	-4.78385785500176
Q9UNH7-1	SNX6	0.0708085068073169	3.31539351112391	2.15468884452796	0.0736759624267211	0.999880997596556	-4.78393077365005
Q6P3S1	DENND1B	-0.056673749994088	3.31193842148938	-1.56025876860788	0.168696751407394	0.999880997596556	-4.78481141653074
Q9H706	FAM59A; GAREM; GAREM1	0.00207824256612267	3.39278347765037	0.0126669286588972	0.990295909047725	0.999880997596556	-4.78522847603897
Q9HBH9-1	MKNK2	-0.0779661824090808	3.30850078489952	-1.58270614293707	0.163551972305127	0.999880997596556	-4.78526202813743
Q16539	MAPK14	0.0807581407633245	3.31615636396115	1.37168768234509	0.218266829153308	0.999880997596556	-4.78608343808816
Q9Y5P8-1	PPP2R3B	0.0578448987905961	3.31224108247825	1.48405135158541	0.187319287205159	0.999880997596556	-4.78664596246664
Q15697-1	ZNF174	-0.0731156965850234	3.34226933948869	-1.2612669321266	0.253104423110091	0.999880997596556	-4.78726222105331
Q9NQ79	CRTAC1	-0.0768118282686351	3.32188998491009	-1.26792819051875	0.250871136114447	0.999880997596556	-4.78810907240788
Q9UIV1-1	CNOT7	-0.0863988093757703	3.31597717653168	-1.66572263700196	0.145790196625051	0.999880997596556	-4.78919395534241
Q2PPJ7-1	RALGAPA2	0.0607493215109287	3.33268105321414	1.72928233195563	0.133458017497931	0.999880997596556	-4.78985955215335
Q15075	EEA1	0.0354311377176085	3.31994451224657	2.41411222290892	0.0514307710840612	0.999880997596556	-4.79060974423167
P62136-1	PPP1CA	0.0780384343369742	3.32146591139871	1.4150723305427	0.205802477901497	0.999880997596556	-4.79064160603582
P17019	ZNF708	0.0909223640192822	3.32927258125036	0.665315871453449	0.530081283214303	0.999880997596556	-4.79099106254118
Q9Y2R4	DDX52	-0.0613263355580219	3.3263428152942	-1.68662606422593	0.141617782581478	0.999880997596556	-4.79120474692802
Q86YD5	LDLRAD3	0.102708150434567	3.32052837109705	0.957553124685006	0.374529215404662	0.999880997596556	-4.79128268938446
Q6ICH7	ASPHD2	-0.0926901076857219	3.31393781312154	-0.525741087236499	0.617544574889651	0.999880997596556	-4.79160034824207
Q96H86	ZNF764	0.10199334938439	3.31773510739333	0.976613812393928	0.365727099403684	0.999880997596556	-4.79213808084601
Q15438-1	CYTH1	-0.0844689693876064	3.31651588570224	-1.68515866950693	0.141906888660703	0.999880997596556	-4.79233351444771
Q8TCT0	CERK	-0.0860753338609063	3.32334394155326	-1.21870211180831	0.267788994224652	0.999880997596556	-4.79284104093382
Q6UB28	METAP1D	-0.0753502187826659	3.30499569205046	-1.41701985815837	0.205258457655498	0.999880997596556	-4.79318162948676
Q8NB25-1	FAM184A	-0.0835427600375322	3.35647042789299	-0.82952043131424	0.437925737474097	0.999880997596556	-4.79433650262425
Q9Y3P9	RABGAP1	0.0746028475065235	3.31893592651402	2.22133143346253	0.0671499558847889	0.999880997596556	-4.79476718237953
Q96DZ5	CLIP3	0.126526359555209	3.30517670363873	1.19426449193064	0.276548708501574	0.999880997596556	-4.79489323607196
Q96SL8	FIZ1	0.0939753206045654	3.34024229578681	0.959467976564192	0.373637545535426	0.999880997596556	-4.79539690789749
Q92546	RGP1	0.0694887717023625	3.32911401048111	1.46041690754823	0.193472592123766	0.999880997596556	-4.79574373926615
Q13642	FHL1	0.0073352480901326	3.25091468014078	0.0437474111535987	0.966496644661084	0.999880997596556	-4.79596617789669
Q6UXD5-5	SEZ6L2	0.0739748796158672	3.31435359475399	1.87798458163721	0.108444903702507	0.999880997596556	-4.79649934820046
P48058-1	GRIA4	-0.0235290369362734	3.3025199728726	-0.140238075516799	0.892968589393647	0.999880997596556	-4.79654933845534
Q9BUT9-1	FAM195A; MCRIP2	0.0110561795780874	3.33768439223507	0.0641857765019777	0.95086520437671	0.999880997596556	-4.79680565239406
Q5SXM8	DNLZ	0.100892502337886	3.35121417174927	1.37207603371654	0.218152286461867	0.999880997596556	-4.79686508557478
Q8N3E9	PLCD3	0.0786300456604193	3.35039050165703	1.20651186427058	0.272128270570967	0.999880997596556	-4.79737667692317
P81408-4	FAM189B	0.0873629637080088	3.27237469677689	0.549975319994186	0.601793111010879	0.999880997596556	-4.79754372193867
P46821	MAP1B	-0.0324593120634392	3.31754032817921	-2.8971303789717	0.0267882286044199	0.999880997596556	-4.79759257544735
Q8IWL3	HSCB	0.0712585545457839	3.30971238518595	1.64062547804753	0.150955761585185	0.999880997596556	-4.79796522785062
Q7Z4W1	DCXR	-0.0906496743721381	3.32330647348521	-1.85722786114828	0.111637119172264	0.999880997596556	-4.79850725253777
Q9UN70-1	PCDHGC3	0.0930776372797373	3.33057045867188	1.11901506240115	0.305073185773487	0.999880997596556	-4.79871729383556
Q9UL42	PNMA2	-0.106755726641126	3.32486697216217	-1.07739491499964	0.32188180526863	0.999880997596556	-4.79920825402331
Q9NW97	TMEM51	0.13910893582496	3.31038682353412	0.955292028869702	0.375584249184989	0.999880997596556	-4.80030545893269
O75071	EFCAB14; KIAA0494	0.0980607307426239	3.32188088833075	0.94289571340327	0.381409474047393	0.999880997596556	-4.80136260680713
Q969H0	FBXW7	-0.0956223340464	3.33341770193897	-1.10423260002414	0.310957778224494	0.999880997596556	-4.80156552663497
Q7LFL8-1	CXXC5	-0.0732883618609683	3.31013933882966	-1.3734963256235	0.217733839283137	0.999880997596556	-4.80159165815438
Q9UP95	SLC12A4	0.0737449831817756	3.31578956328749	1.4836188407486	0.187430246224889	0.999880997596556	-4.80180423558816
P43351	RAD52	-0.0993341704646691	3.32335931799832	-0.654342535716075	0.536663867381388	0.999880997596556	-4.80182300480253
P07919	UQCRH	0.121795860661567	3.32246145990787	1.29074419612439	0.243352431439189	0.999880997596556	-4.80401858955925
Q86W74	ANKRD46	-0.198816676125368	3.32021934200565	-1.40905807589349	0.207490810226202	0.999880997596556	-4.80433899216548
Q9BQQ3-1	GORASP1	0.072434434746554	3.31969337209862	1.37201759613989	0.218169518921698	0.999880997596556	-4.80503245523401
Q96C36	PYCR2	-0.0665442648694872	3.30252947606194	-2.09489469921985	0.0800832351669081	0.999880997596556	-4.80506604443418
Q9H7D7-2	WDR26	-0.0811187416618551	3.32199398621004	-1.96093177197296	0.0965693925191663	0.999880997596556	-4.8051105406362
A5PLL7	TMEM189; TMEM189-UBE2V1	-0.0526160754453078	3.29509727716489	-0.27878767013145	0.789578366739741	0.999880997596556	-4.80531200617755
Q9H307	PNN	-0.0402415315399214	3.31410929674124	-2.36853546375953	0.0547640245877557	0.999880997596556	-4.80532132088639
O43683	BUB1	-0.0623183011585182	3.31441066826687	-1.73325988887965	0.132720793899937	0.999880997596556	-4.80570998657486
Q9HCU9	BRMS1	0.126542669408244	3.31441072829071	1.39484227021392	0.211531771978621	0.999880997596556	-4.80722479284221
Q14201-2	BTG3	0.0686513282860229	3.32188052541792	1.21430079860693	0.269348760531562	0.999880997596556	-4.80842284080165
Q9Y296	TRAPPC4	0.0798820411657838	3.32899780436828	1.57596224004975	0.165081840284551	0.999880997596556	-4.80849191011113
Q9BQP7	C20orf72; MGME1	-0.0429755187695794	3.30414997291941	-1.89499570795661	0.105896353144382	0.999880997596556	-4.808693789499
Q6Y2X3	DNAJC14	0.145873807105446	3.32507322487042	1.10052564431379	0.312448145598943	0.999880997596556	-4.80892400935526
Q9BRR0-1	ZKSCAN3	-0.0842041352293015	3.31856204022377	-1.00622326234018	0.352377367586461	0.999880997596556	-4.80933247857218
Q9UL54-2	TAOK2	0.0817656509781989	3.30321860010904	1.15265931624508	0.292026700340225	0.999880997596556	-4.81017075744387
P61006	RAB8A	-0.152640186697198	3.30617346280834	-1.20711463953354	0.27191228919046	0.999880997596556	-4.81042838455238
Q5HYA8	TMEM67	0.0876343336051758	3.33055322918964	0.647172877047498	0.540992622994894	0.999880997596556	-4.81076209478165
Q6NTE8	C5orf45; MRNIP	0.0779368259010055	3.31047628067467	1.26149476069245	0.253027753333361	0.999880997596556	-4.81128775600256
O14777	NDC80	0.0380118661154373	3.32033402805718	2.20574089687544	0.0686214470593671	0.999880997596556	-4.81133044984492
Q9Y4L5	RNF115; LOC101060478	0.0688234857688859	3.31814122871978	1.26026979409692	0.253440223427528	0.999880997596556	-4.81136991223041
O00748	CES2	-0.0810632009001521	3.33741347977571	-1.0563949218759	0.330647955366426	0.999880997596556	-4.81137098581802
P46939-2	UTRN	0.0600391262387091	3.3202092841335	1.47419992470907	0.189861792735172	0.999880997596556	-4.81216865592151
Q9H8X2	IPPK	-0.0764922884473937	3.32902224620774	-1.05581908849366	0.330891046747618	0.999880997596556	-4.8124881041614
O75030	MITF	-0.0856915186998402	3.33420029704742	-1.00915633471653	0.35107630955729	0.999880997596556	-4.81304007793675
Q9UJU3	ZFP112; ZNF112	0.0669050534954782	3.31864865308192	0.473116593456972	0.652514541221778	0.999880997596556	-4.81379142417451
Q9UGM6-1	WARS2	-0.0938070010029662	3.30530585990531	-1.7241167853918	0.134421365220238	0.999880997596556	-4.81382546309783
Q5IJ48	CRB2	0.0760151730319195	3.32336101200358	1.62526453163433	0.154203313362884	0.999880997596556	-4.81451391961591
P17405-1	SMPD1	0.0242025650418537	3.33281035615342	0.146527824363681	0.888207071687578	0.999880997596556	-4.81495459395547
O75078-1	ADAM11	0.10277633792297	3.30476205219657	1.18794281930398	0.278854395017992	0.999880997596556	-4.81516294277995
Q92572	AP3S1	0.0401433510553121	3.31847042616176	1.78578250574096	0.123350108600414	0.999880997596556	-4.81541930508269
Q8IZ40	RCOR2	-0.041516042453005	3.32158324483128	-1.9411373672444	0.0992797531248489	0.999880997596556	-4.81627758246258
Q96C11-3	FGGY	0.135802102137521	3.30404388494292	0.764239132612009	0.47311872437434	0.999880997596556	-4.81668384536883
Q5T7W7	TSTD2	0.118648474984389	3.35397871922302	1.31168791691206	0.236626663299719	0.999880997596556	-4.8172050334086
P49458	SRP9; SRP9P1	-0.0775578560059547	3.32265854601772	-1.97260258802605	0.095006229551942	0.999880997596556	-4.81790445493509
Q8IUH4	ZDHHC13	0.0881141919080265	3.32819677094389	0.960746065741912	0.373043311658705	0.999880997596556	-4.81820862140164
Q96C12	ARMC5	0.0672042624115149	3.33408446546688	1.37953650997019	0.215962368348969	0.999880997596556	-4.8194036499994
Q9UEE5	STK17A	0.0832295048631558	3.34174036342313	1.11880994645883	0.305154198540236	0.999880997596556	-4.81998714047747
Q9BTV7	CABLES2	-0.0796524601559853	3.3220357459402	-1.12116042802634	0.304226926142349	0.999880997596556	-4.8205105058243
P17535	JUND	0.0625313176367962	3.32515503680011	1.25215712724991	0.256186798272228	0.999880997596556	-4.82079079538526
Q0VDF9	HSPA14	-0.0444990668206344	3.32155928707674	-1.84641147537926	0.113337264191714	0.999880997596556	-4.82156637163156
Q9Y5A6	ZSCAN21	-0.0903128820911863	3.29453975988578	-1.19987556028151	0.274515911129156	0.999880997596556	-4.8219793273478
Q7Z5H3-2	ARHGAP22	0.0979809575539635	3.30224649116942	0.789059808881301	0.459510760223201	0.999880997596556	-4.82299023543157
Q86VZ2	WDR5B	-0.0658390665131842	3.3233114250146	-1.46376210684714	0.192590452321707	0.999880997596556	-4.82328422772636
Q9NS15-1	LTBP3	-0.0722764067586541	3.34202773207863	-0.588493082435798	0.577235400145908	0.999880997596556	-4.8233792669273
Q6UWP2	DHRS11	0.133385529442058	3.32721141010828	1.40891873998157	0.207530074130689	0.999880997596556	-4.82446615531447
Q9P2D6	FAM135A	0.0807453942491434	3.33349059741495	1.17907255223886	0.282117336489172	0.999880997596556	-4.82451336877297
Q9Y697	NFS1	-0.0617791296998588	3.29807777644591	-1.80047921558942	0.120845935834123	0.999880997596556	-4.82472519542585
O14492	SH2B2	0.00437951974435369	3.33636792945698	0.0274414663130823	0.978979600743758	0.999880997596556	-4.82500007896323
P14672	SLC2A4	-0.0908332013958336	3.3252891056438	-1.16955065805602	0.285656170688762	0.999880997596556	-4.82547105221662
Q96NG3-1	TTC25	-0.0704072691303325	3.28129898049146	-0.596259853251663	0.572356216981095	0.999880997596556	-4.82553847710099
P78549	NTHL1	-0.0961797985224538	3.29469732429722	-1.17374218572401	0.284093749826715	0.999880997596556	-4.82560600041222
Q8TBC4-1	UBA3	0.0416052216749148	3.31877886781656	1.96338905953684	0.0962381395209209	0.999880997596556	-4.82790337135044
Q13563	PKD2	-0.123832459817235	3.33440274896005	-0.907084730915084	0.398628883441055	0.999880997596556	-4.82816902820582
Q9ULI3	HEG1	0.0251868102725021	3.30337311469749	0.175652671055984	0.866228330511004	0.999880997596556	-4.82876857102443
Q9Y248	GINS2	0.0874149149679507	3.32921522531055	1.55941120275212	0.168893967495085	0.999880997596556	-4.82938088252611
Q8TF30	WHAMM	0.0296734764778011	3.36272154276325	0.191161600315373	0.854576322339283	0.999880997596556	-4.8294916811188
O60911	CTSL2; CTSV	-0.0782946981204926	3.30525429683527	-1.06632568406997	0.326478485361304	0.999880997596556	-4.82950692695724
Q9BR11	ZSWIM1	0.0170047085846315	3.34287627914251	0.0981146284528458	0.924972359715341	0.999880997596556	-4.83006724284561
Q9NXR8-1	ING3	-0.121225946854071	3.31552945434517	-1.65499428794932	0.147977252422419	0.999880997596556	-4.83025430660915
Q6NT04	TIGD7	-0.0680657398853021	3.32822789375399	-0.452645729654095	0.666389548433672	0.999880997596556	-4.83050697648524
Q8TC76	FAM110B	-0.0808485858054638	3.309177063777	-1.22334468926617	0.266152194350378	0.999880997596556	-4.83062685902653
Q9BSF8-2	BTBD10	-0.0704291602868274	3.32755982912224	-1.32312819480836	0.233022941420783	0.999880997596556	-4.83066807786361
P19532	TFE3	-0.082236060451824	3.3472709667316	-0.796083138593114	0.455710704856234	0.999880997596556	-4.83093511374598
Q9H4E7	DEF6	0.0792061979222667	3.31668958579086	1.21381414086679	0.269521706186775	0.999880997596556	-4.8312202442948
Q9Y4A0	JRKL	-0.075518493476943	3.30564786440851	-1.102531723839	0.311640875044099	0.999880997596556	-4.83232752853905
Q9NX18	SDHAF2	0.109492582271502	3.31364392213533	1.08631650160751	0.318215771642232	0.999880997596556	-4.83263244896077
O75553-5	DAB1	-0.0663888917310334	3.31099256417344	-1.41957031495797	0.204548002225019	0.999880997596556	-4.8330896232977
Q6ZNA5-2	FRRS1	0.0613165882858505	3.32582376973164	1.26128471849983	0.253098436836694	0.999880997596556	-4.83433078517957
Q6P4Q7	CNNM4	0.0925491188547207	3.30870364575214	0.709735362822169	0.503969085846741	0.999880997596556	-4.83434219384834
Q99757	TXN2	-0.118785689059559	3.31505301138111	-1.46948576626512	0.191089714296653	0.999880997596556	-4.83434496535793
Q9UPP2	IQSEC3	-0.0447495963555737	3.30043678305467	-0.300720926744214	0.773570668768693	0.999880997596556	-4.83451351330541
Q15672	TWIST1	0.0757548273318466	3.34901318212188	1.21288185092615	0.269853285721263	0.999880997596556	-4.83544534049461
Q9H8V3-3	ECT2	0.0468948488244931	3.32319651080864	2.05841318581532	0.084268324807536	0.999880997596556	-4.83573867162526
Q9C0B9	ZCCHC2	0.059996293725567	3.32854963986349	0.454353215039908	0.665226602607811	0.999880997596556	-4.83619646783616
P49137	MAPKAPK2	-0.11478231375474	3.31321508154541	-1.38536218962125	0.21426617387224	0.999880997596556	-4.83638844611296
Q6IC98-1	GRAMD4	-0.143402022081572	3.3153777113846	-1.68683887008504	0.141575902744315	0.999880997596556	-4.8377959298588
Q8TAB5	C1orf216	0.0374419721999052	3.34152966169802	0.263057496674663	0.801128754388234	0.999880997596556	-4.83819135947517
Q00577	PURA	-0.0667128180913973	3.32263052042809	-1.7609349695212	0.127699867001591	0.999880997596556	-4.8386758381416
Q567U6	CCDC93	0.0851227335138133	3.32305505070173	1.79060969376904	0.122522046076488	0.999880997596556	-4.8393628846134
Q9UPW8	UNC13A	0.151574953049985	3.32473592012135	0.901400352205412	0.40141575439937	0.999880997596556	-4.83969902818755
Q9H1U4	MEGF9	0.0903048657447149	3.31873998081705	0.807300005850337	0.449688011026551	0.999880997596556	-4.84018358344153
Q7Z3J2-1	C16orf62	0.0596067971782433	3.32360441487203	1.85135741401223	0.11255669780797	0.999880997596556	-4.84032769534305
Q92600-2	RQCD1; CNOT9	0.0813982610903187	3.32181747732941	1.80537002037294	0.120023701699132	0.999880997596556	-4.84064172135905
O43294-1	TGFB1I1	0.0707343140425473	3.32307317091677	0.48751309139198	0.642846262907046	0.999880997596556	-4.84103496405544
Q9NY65	TUBA8; EHHADH	0.0833445987652267	3.33882679350431	0.823802353832701	0.440931137029044	0.999880997596556	-4.84170709207933
Q9UKX7	NUP50	-0.0616038029274057	3.31171061429645	-2.35370382183193	0.0558967228505607	0.999880997596556	-4.842569152456
Q969S2-1	NEIL2	0.0834725650269502	3.30072281338894	0.900882115273873	0.401670560847456	0.999880997596556	-4.84270448383059
Q56A73	SPIN4	0.070725733772238	3.32063914458732	1.43940750101389	0.199098500355546	0.999880997596556	-4.8441263610748
Q8IUW5	RELL1	0.0987664821344447	3.31845466545081	0.862448675195148	0.420908361613838	0.999880997596556	-4.84451400122543
Q9H977	WDR54	0.0703400301423814	3.32672409950502	1.33903320483684	0.228094161318459	0.999880997596556	-4.84464922912107
Q8WWL2-1	SPIRE2	-0.0530963834788071	3.34615192004548	-0.363857314951326	0.728190464856158	0.999880997596556	-4.84492196214044
Q96AX9-14	MIB2	-0.00444213671842136	3.33670561907226	-0.0238287133716254	0.981746345220693	0.999880997596556	-4.84514858125018
Q9BV44	THUMPD3	0.0572682100238193	3.3226240175271	1.88379440984372	0.107567720070357	0.999880997596556	-4.8454026715639
Q8NE00	TMEM104	0.143991364993534	3.30629300531806	1.24588598993118	0.258327700652309	0.999880997596556	-4.84546357664483
E9PAV3	NACA	0.034856418794411	3.33229236114405	1.89938206166128	0.105248911329247	0.999880997596556	-4.8464963159261
P01033	TIMP1	0.0846769154684827	3.32438715301387	0.874428481617992	0.41483970431666	0.999880997596556	-4.8465337669195
O14523	C2CD2L	-0.0807141810353535	3.33707292423541	-0.871749344016867	0.416191208760829	0.999880997596556	-4.84677231427862
Q9H777	ELAC1	-0.0855310958972071	3.29906844086661	-0.478833918499687	0.648665983227878	0.999880997596556	-4.84760319882575
Q96C45	ULK4	0.0808833010476346	3.32160746231215	0.689979233744788	0.515476449388045	0.999880997596556	-4.84774370115723
Q96I27-2	ZNF625	-0.0875678301039282	3.30124108203913	-0.760418975971952	0.475237763321281	0.999880997596556	-4.84777032235603
Q9H5V7	IKZF5	-0.0519702860714329	3.31023108515262	-1.5285551671308	0.176223097760774	0.999880997596556	-4.84830815648247
P63218	GNG5	0.136402356142285	3.35254070270464	1.44424234933849	0.197790652120216	0.999880997596556	-4.84899571026274
Q8NB42-1	ZNF527	-0.102697386574535	3.35319057146245	-0.788602737117926	0.459758837543851	0.999880997596556	-4.84906936115992
Q99504	EYA3	0.0607613861691642	3.33569851473665	1.54639866921539	0.171949167903824	0.999880997596556	-4.84910449944399
Q6P1L5-1	FAM117B	0.0624125063600399	3.32835037982733	1.68654469835075	0.141633798405586	0.999880997596556	-4.84930057074054
Q01459	CTBS	0.192548686434491	3.32237901419524	0.930030658173208	0.387528540275857	0.999880997596556	-4.85021715651131
P29374-1	ARID4A	-0.0648455328974271	3.31493960604471	-1.75323765150706	0.129077469809656	0.999880997596556	-4.85081411759906
Q8N490	PNKD	-0.0841844580015854	3.32992545988862	-0.596894288427786	0.571958749333139	0.999880997596556	-4.85110698623064
Q9Y5J5	PHLDA3	0.073577401513134	3.30656787486658	0.998243984813207	0.35593626740719	0.999880997596556	-4.85219249312748
Q16514	TAF12	-0.0812949726900053	3.32788035941514	-1.21969622107458	0.267437777742047	0.999880997596556	-4.8523575051769
P62072	TIMM10	0.187768931000129	3.29636071905921	1.55576959909648	0.169743788505422	0.999880997596556	-4.85252283797136
Q9Y6Q3-2	ZFP37	0.180091151671499	3.35486961662658	1.07641715017003	0.322285688526294	0.999880997596556	-4.85346881530349
Q8N556-2	AFAP1	-0.25213695408	3.31349158490331	-1.56827808394692	0.166841487797629	0.999880997596556	-4.85360170726586
P41240	CSK	0.0374902312177806	3.32012297489052	2.07697098208326	0.0821123661284986	0.999880997596556	-4.85375604183328
Q8N6Q8	METTL25	0.0784263183528151	3.33441189265501	0.740744422953898	0.486254847454562	0.999880997596556	-4.85425144997494
P26374	CHML	0.0884093593401874	3.33317351342569	1.8240006980859	0.116941593874122	0.999880997596556	-4.8553214735304
Q7Z309-3	FAM122B	0.0712914346432969	3.34327766662414	0.731790929908665	0.491325765085375	0.999880997596556	-4.85703870845233
O95476	CTDNEP1	-0.0740162823287706	3.32592794481842	-1.12670141251202	0.302050307082888	0.999880997596556	-4.85805569425744
Q9H3G5	CPVL	0.0498310414704308	3.31794114031174	1.76212819384883	0.127487601128343	0.999880997596556	-4.85813730526343
Q96BD5-2	PHF21A	0.0847700096651508	3.32300799695477	0.893693858457323	0.405217485877745	0.999880997596556	-4.85835140778848
Q9BTN0	LRFN3	0.0759654119323485	3.30578672939739	0.479974747041112	0.647899454950933	0.999880997596556	-4.8590985033902
Q9P0T4	ZNF581	0.0102125555290273	3.25628263206172	0.0562645062474284	0.956921048463292	0.999880997596556	-4.85941226928562
O95997	PTTG1	0.0707947126935586	3.33064104365191	1.5080199457473	0.181264761950066	0.999880997596556	-4.85959612216488
Q96FJ0	STAMBPL1	0.0604333147853053	3.336964812391	1.73601355095638	0.13221273279721	0.999880997596556	-4.85967446851593
Q9BWH2	FUNDC2	-0.236522420878785	3.31307387515135	-1.46163569291298	0.193150763605973	0.999880997596556	-4.86005921896502
Q9NVV9-1	THAP1	-0.079379258666945	3.31794874577652	-1.35237760993389	0.224031110082077	0.999880997596556	-4.86035663278047
Q9GZP1	NRSN2	0.0111480837655399	3.28130199152229	0.0716870438502856	0.945133745556159	0.999880997596556	-4.86099418536158
Q53ET0	CRTC2	-0.0467030210084746	3.31607667906321	-1.68574371869573	0.141791554153408	0.999880997596556	-4.86143219391115
Q9NRW7	VPS45	0.0471825308517818	3.32192676733913	2.05341839227355	0.0848583388495109	0.999880997596556	-4.86198543838841
Q96M94	KLHL15	-0.0679268886596983	3.32267733982459	-1.53793769923772	0.173963497753555	0.999880997596556	-4.862310542478
Q96JP0	FEM1C	0.0645396068060132	3.34472175468589	1.23804022602684	0.26102811237109	0.999880997596556	-4.86267307945699
P21127-3	CDC2L2; CDK11B	0.117975246878363	3.31497791638362	1.36944787261358	0.21892851262806	0.999880997596556	-4.86297257140753
Q86Y97	SUV420H2; KMT5C	-0.155484159242152	3.32942095965397	-1.14003384723265	0.296866461443919	0.999880997596556	-4.86364965279365
O75373	ZNF737	-0.0792753476710749	3.3504231778284	-0.632675748050502	0.549812290674926	0.999880997596556	-4.86368594144179
O76038	SCGN	0.0505765112041332	3.31781315782285	1.55057359127289	0.170963323113478	0.999880997596556	-4.86370935258775
P52849-1	NDST2	-0.0779806584215736	3.345823108962	-0.762128391235932	0.474288741053726	0.999880997596556	-4.86384499165551
Q8N4Q0	ZADH2	0.0900815001619281	3.29806198359655	1.22240603699808	0.266482428266798	0.999880997596556	-4.86464335645405
Q9H0X9	OSBPL5	-0.0564739957403536	3.36603351829387	-0.322487856958494	0.757803537307042	0.999880997596556	-4.86475967512101
Q9H972	C14orf93	0.122371381473556	3.32640523141768	0.873273263306763	0.415422058947721	0.999880997596556	-4.86489347531294
Q13435	SF3B2	-0.0458790685962403	3.3223157706045	-2.46500699579294	0.0479580623814432	0.999880997596556	-4.86512995784563
Q8NEH6	MNS1	-0.0707006019228845	3.32890471800053	-0.523190058350633	0.619215855225813	0.999880997596556	-4.86524338414338
Q9BWH6	RPAP1	0.0791617736343967	3.33086285062406	1.29171844107429	0.24303585374699	0.999880997596556	-4.86551278260244
Q5JU69-1	TOR2A	-0.0757923230211801	3.34189911529548	-0.812848964510988	0.446729690367284	0.999880997596556	-4.86553992860528
Q9UPN3	MACF1	-0.149163211204442	3.31424313686341	-1.2500334704311	0.256910052439184	0.999880997596556	-4.86636953762013
P35716	SOX11	0.0764632764547796	3.32500798445195	1.36205622919663	0.22112500968737	0.999880997596556	-4.8674050529167
O75531	BANF1	0.446046008582002	3.21005198919411	1.36987196631902	0.218803088265058	0.999880997596556	-4.86760910735995
Q9Y315	DERA	0.0741527431449453	3.34203444729277	1.74871708935684	0.12989326200795	0.999880997596556	-4.86886364902569
Q9BV35-3	SLC25A23	0.0485268597782322	3.30917541033965	0.401372172665412	0.701770312806355	0.999880997596556	-4.86887722809715
Q9BRX5	GINS3	0.0579387918382976	3.33242419604171	1.65884132721373	0.147189407872096	0.999880997596556	-4.86954520761599
Q96B97-1	SH3KBP1	-0.0679205740065425	3.32379415582072	-1.70506523839953	0.138032990221379	0.999880997596556	-4.86988596358408
Q8NDW4-1	ZNF248	-0.0711868820917607	3.3366996860036	-0.905353893875036	0.399475901472546	0.999880997596556	-4.87022893697357
Q9H8G1	ZNF430	-0.0710213461207985	3.32139902881959	-1.19731680544424	0.275441309266355	0.999880997596556	-4.87041423943445
Q6AI12	ANKRD40	0.0558526294462754	3.33286595361801	1.48939386240506	0.185953702550355	0.999880997596556	-4.87074034611774
Q6EEV4-1	POLR2M	0.103421993547906	3.33796168612587	1.16945926833055	0.285690318098445	0.999880997596556	-4.87107837670605
P52747	ZNF143	0.0482746134261061	3.32607487802088	1.70457311265237	0.138127516460928	0.999880997596556	-4.87125719968452
P11413-2	G6PD	0.0413062883126857	3.32153344290302	2.18480929228138	0.0706493504292607	0.999880997596556	-4.87151230641228
O95677-2	EYA4	-0.238036053804298	3.32983926189475	-1.20166977420781	0.27386861058826	0.999880997596556	-4.87252190676438
Q9Y3V2-1	RWDD3	0.0763731712361704	3.31452731928412	1.21376484349609	0.269539230550133	0.999880997596556	-4.87270692498962
Q9H0M0-1	WWP1	-0.0178488562687488	3.34394771098558	-0.106074093283672	0.918911292941149	0.999880997596556	-4.87287683523846
Q9UHK6-5	AMACR	0.0948367667232851	3.33639697388437	0.863643323673257	0.420300248545258	0.999880997596556	-4.87333586966896
O94983-6	CAMTA2	-0.0579837533547978	3.3070936078472	-0.501211469572416	0.633717067292503	0.999880997596556	-4.87439071223559
Q8WTS6	SETD7	0.0625683641832196	3.32488079547358	1.70727930579011	0.137608491156464	0.999880997596556	-4.8746561548422
Q8WTR4-1	GDPD5	0.0833828332397138	3.31663305187775	0.820955200277348	0.442433133025302	0.999880997596556	-4.87494161382732
Q5T280	C9orf114; SPOUT1	0.108744982924596	3.31850022920037	1.50822996281749	0.181212525372917	0.999880997596556	-4.87516741181004
Q9UBK7-2	RABL2A	0.0625118775965587	3.31971470645088	1.389280397545	0.21313215502455	0.999880997596556	-4.87536611610304
Q9H992	MARCH7	-0.0970173132968268	3.2791458449564	-0.862712748585278	0.420773884098066	0.999880997596556	-4.87595647564829
Q9Y371-2	SH3GLB1	0.0708332316496281	3.31548115315899	1.77326851410114	0.1255223666992	0.999880997596556	-4.8760695071882
Q58EX7	PLEKHG4	0.04003345017855	3.33176674438999	1.73654661511973	0.132114598993213	0.999880997596556	-4.87629451026555
Q9GZN7	ROGDI	0.0684775268729516	3.31556511777235	1.46712956307159	0.191706195259829	0.999880997596556	-4.87659629052175
Q9BV68-2	RNF126	0.069459166151547	3.32710218565592	1.39662733855195	0.211020451404951	0.999880997596556	-4.87670789751819
Q02078-5	MEF2A	-0.0836459653255053	3.30389478076692	-0.948034033774977	0.37898646166101	0.999880997596556	-4.87687922584151
O15226-2	NKRF	-0.0422895899510215	3.31648953313343	-2.19464062174116	0.0696893097906225	0.999880997596556	-4.87722201452717
P0CK96	SLC35E2B	0.0843995408578146	3.31933660849759	0.774994096263728	0.467188203267355	0.999880997596556	-4.87723514090475
Q9NR33	POLE4	0.0695029873539211	3.31711753879483	0.755556387929731	0.477944516580758	0.999880997596556	-4.87730720599244
P55345-1	PRMT2	-0.0681954825579406	3.3352708872079	-0.769485709203431	0.470219143493262	0.999880997596556	-4.87736332077028
Q6NW40	RGMB	-0.105073154961659	3.31142807973544	-1.07827006468907	0.321520661725169	0.999880997596556	-4.87742541330702
Q5VUJ9-2	EFCAB2	0.113640172265279	3.31790886114337	0.993691522487289	0.357979499939811	0.999880997596556	-4.87752411472564
P31939	ATIC	0.0296570011625255	3.32072114151146	2.4002414860402	0.0524221677517486	0.999880997596556	-4.87892154388613
Q07817-1	BCL2L1	0.070234604896378	3.31938322996982	0.933277397285873	0.385977200631367	0.999880997596556	-4.87917868448465
Q9BXJ8-1	TMEM120A	0.10923296706041	3.3148363746241	1.37402488121266	0.21757830119188	0.999880997596556	-4.87928484301898
Q6ZUJ8	PIK3AP1	0.0440358221833948	3.35788509557425	0.366681733601257	0.726186513513094	0.999880997596556	-4.87939457140509
P50990	CCT8	0.0634306081588978	3.31286015575378	1.4663612750746	0.191907608419711	0.999880997596556	-4.87985357874714
A6NK58	LIPT2	-0.0798528102711563	3.31328394628234	-0.764522006298007	0.472962075253861	0.999880997596556	-4.88035618416094
Q6NUS6	TCTN3	0.102638867602282	3.32735948040827	1.09002318521037	0.316702781096235	0.999880997596556	-4.88046135520722
Q9C0B7	TANGO6; TMCO7	0.0739729308922848	3.32282709487558	1.64237249498409	0.150590581195745	0.999880997596556	-4.88091302633063
Q8WVL7	ANKRD49	0.0805701425229323	3.29444877779341	1.21322944173999	0.269729619961343	0.999880997596556	-4.8818047089179
Q96MC5	C16orf45	0.0743807394836095	3.30367653578061	1.0140018409957	0.348935330682895	0.999880997596556	-4.88222911409669
Q9UK80-1	USP21	-0.0818555561291699	3.33439956759993	-0.887494302783303	0.408295446966072	0.999880997596556	-4.88265442876918
Q9NRJ7	PCDHB16	0.0726556576629916	3.37330748067576	0.783337538773366	0.462623350730371	0.999880997596556	-4.88301840376636
Q96JQ2	CLMN	0.0656939225269988	3.32188171333686	1.71607377228883	0.13593478443595	0.999880997596556	-4.88362424472982
Q15131-1	CDK10	-0.1013140886517	3.33631295418156	-1.16686299249088	0.286661856835062	0.999880997596556	-4.88373086772765
O43264	ZW10	0.073673057110786	3.32057838033486	2.12636501320112	0.076643116986209	0.999880997596556	-4.88420793885892
Q9Y6Q2-3	STON1-GTF2A1L; STON1	0.0989178630519022	3.31374177006077	0.758104990085544	0.476524517376701	0.999880997596556	-4.88489595857564
Q96MH6-1	TMEM68	-0.043157387120427	3.30503506988289	-0.18305364038638	0.860663131021573	0.999880997596556	-4.8848995741035
P04049	RAF1	0.0472569359015286	3.33114326002108	1.81787818193742	0.117945767430622	0.999880997596556	-4.88572355180563
O95461-1	LARGE; LARGE1	0.0752350377552535	3.29133135875974	0.515164958709811	0.624489590334751	0.999880997596556	-4.88592419788609
Q8NBE8	PHOSPHO2-KLHL23; KLHL23	-0.0835749148943375	3.30605817622298	-0.844028804879689	0.430366942044047	0.999880997596556	-4.88596171853511
O43189	PHF1	-0.0592635820812746	3.30500336184636	-0.462291259485993	0.659833472978274	0.999880997596556	-4.88613117283472
Q96GZ6-9	SLC41A3	-0.10933541625052	3.32465193113932	-0.589395953188368	0.576666937814158	0.999880997596556	-4.88622689330802
Q96T17-2	MAP7D2	-0.0643009461541042	3.31399034636635	-1.99149868732329	0.0925290021965894	0.999880997596556	-4.88626167648737
Q9Y4X4-1	KLF12	-0.0719085933880255	3.33710699612278	-0.513987903880186	0.625265152393058	0.999880997596556	-4.88706444859361
Q8N392-1	ARHGAP18	0.0254968756098853	3.29500091173221	0.175029594815925	0.866697243228544	0.999880997596556	-4.88732204496227
P51452	DUSP3	-0.118907591767582	3.31833855780055	-1.58435967623812	0.163178917649047	0.999880997596556	-4.88763616755837
Q96G75-1	RMND5B	0.074855881939492	3.34913512585241	0.804825785670459	0.451011596630312	0.999880997596556	-4.88801772546782
Q9ULD4	BRPF3	-0.0533076827778088	3.32291472908868	-1.76841753253445	0.126374452059623	0.999880997596556	-4.88839508000311
Q27J81	INF2	0.0498943127118081	3.3343723160984	1.73788570029936	0.131868393895681	0.999880997596556	-4.88969674195035
Q9BT04-1	FUZ	0.0824694072697794	3.33937111401068	1.07379165535203	0.323372255058914	0.999880997596556	-4.88997812784336
Q8IY57-5	YAF2	-0.079883394062898	3.32445817707586	-0.854476360119377	0.424983165105846	0.999880997596556	-4.89210360433243
Q9C0D7-2	ZC3H12C	0.0890972542895549	3.33150050551814	1.14247219769939	0.295926529939401	0.999880997596556	-4.89215824031433
O14544	SOCS6	0.0832620605441091	3.31823930873691	0.949102265039407	0.378484229415375	0.999880997596556	-4.89330217688358
Q14558-2	PRPSAP1	0.0549822409772686	3.32383842712077	1.8509019849824	0.112628350868851	0.999880997596556	-4.89360674671979
Q05586-5	GRIN1	-0.0924026407722566	3.30927851393602	-0.719435992665614	0.498381670039458	0.999880997596556	-4.89400409050988
Q8WVR3	C7orf43	-0.0247672122077947	3.34999093206083	-0.149301838276268	0.886108667771952	0.999880997596556	-4.89448176090287
Q8TD17	ZNF398	-0.0630250079567597	3.32810980187675	-1.25391152285457	0.255590645558311	0.999880997596556	-4.89536936647885
Q9BZ23	PANK2	0.095212596923119	3.30639010858448	1.00746995949107	0.351823886332371	0.999880997596556	-4.89544220237851
Q9NUP7-1	TRMT13	-0.051484589777736	3.32359037109569	-1.8424655529453	0.11396384049602	0.999880997596556	-4.89587982594438
Q96NT3-3	GUCD1	-0.0544536051982482	3.33034504374344	-0.478162406479592	0.649117395065295	0.999880997596556	-4.89604431438895
O75154-3	RAB11FIP3	0.0752521599905503	3.33496341901729	0.657977232818579	0.534477787656066	0.999880997596556	-4.89642144727821
Q8TEB9	RHBDD1	-0.0252261746988781	3.34342687752164	-0.158443679836072	0.879200543622598	0.999880997596556	-4.89718115929887
Q13114-1	TRAF3	-0.0456023794154754	3.31448390462712	-1.60440110723381	0.15872100226034	0.999880997596556	-4.89743229781536
Q8TBZ5	ZNF502	-0.0104606695150629	3.30739706257869	-0.0707920687544876	0.945817384216915	0.999880997596556	-4.89889180897491
Q9UN36-6	NDRG2	0.0687640893040733	3.31038469747711	1.49921549325797	0.183467317154339	0.999880997596556	-4.89945209845503
Q9H1B5	XYLT2	-0.011256452796757	3.31497205943992	-0.0886141627720801	0.932214048542969	0.999880997596556	-4.90019609304258
Q8TAQ5-2	ZNF420	-0.0866546428318676	3.33438415529383	-0.819119495558813	0.443403499434963	0.999880997596556	-4.90036738210779
Q14849-1	STARD3	0.0984158895774552	3.31069242183257	1.06869777346679	0.325488936904112	0.999880997596556	-4.90053985890942
Q86VX2-1	COMMD7	0.0560805151125967	3.32201595587536	1.60569427834014	0.158437361776988	0.999880997596556	-4.90081300361232
Q9NQV8-1	PRDM8	-0.0829185411646065	3.31826479262132	-0.869949767019855	0.41710085059311	0.999880997596556	-4.9009643169404
Q99502-1	EYA1	0.0698605838811204	3.31419513026758	1.38131298262514	0.215443849737091	0.999880997596556	-4.90116656154003
P36402-3	TCF7	-0.0672611924201629	3.34264052799203	-0.67579982596275	0.523840765677148	0.999880997596556	-4.9014408150976
P15259	PGAM2	-0.0515420999559708	3.31793117321695	-1.71405181612456	0.136317836649539	0.999880997596556	-4.90171220529112
Q8WWB7	C1orf85; GLMP	-0.0466440590871783	3.3140967505289	-0.428419969322943	0.682997151574944	0.999880997596556	-4.90373375219118
P35080-1	PFN2	0.0932096979041759	3.32210050409279	1.5908483334632	0.161722777681555	0.999880997596556	-4.90388339894186
P48454-3	PPP3CC	-0.0654810822704372	3.32856187781883	-0.996946962831009	0.356517451082187	0.999880997596556	-4.90530187923115
Q8N157-1	AHI1	0.0631541922984278	3.32182896270151	0.696049439711548	0.511922505819994	0.999880997596556	-4.90570071988128
Q8IXX5	TMEM183A	0.0777758897814058	3.37590500072604	0.840091704512901	0.432408681770235	0.999880997596556	-4.90570651553158
Q9H2B2	SYT4	0.0788463212273493	3.31147539961314	1.15493444892504	0.291161689658632	0.999880997596556	-4.90619377259314
Q96LI5-1	CNOT6L	0.0487327143690783	3.33087164729568	1.44724159269415	0.19698331638154	0.999880997596556	-4.90636604990187
Q15772	SPEG	0.00377293586935823	3.33490532009238	0.0290292163684325	0.977763756986752	0.999880997596556	-4.90667176543109
O60296	TRAK2	-0.0799416049731528	3.34508617128211	-0.944770599220236	0.380523973371559	0.999880997596556	-4.90691606437905
P24278	ZBTB25	-0.0638280789704425	3.33677403279647	-0.556046439040336	0.597883035515054	0.999880997596556	-4.90694768427452
Q7Z6J6-1	FRMD5	0.0833166609731031	3.31611310680178	0.819141129901519	0.443392054453846	0.999880997596556	-4.90725510421809
Q9Y676	MRPS18B	-0.0617559554996182	3.30485737689443	-1.70507323305381	0.138031455145317	0.999880997596556	-4.90727800682689
Q9UDV6	ZNF212	-0.0704337301300436	3.33703406570787	-1.0619877147156	0.328294488139335	0.999880997596556	-4.90729989796476
P17050	NAGA	0.0597529508608055	3.32875680558253	1.43308803849266	0.200819913970711	0.999880997596556	-4.90733501869349
Q8N6S4	ANKRD13C	0.0614681355003418	3.34068840246662	1.14948751504944	0.293236250406311	0.999880997596556	-4.90741501777119
Q2NKJ3-1	CTC1	0.063477435639676	3.32563474634491	1.45770026004572	0.194191722189057	0.999880997596556	-4.90744434359889
O14933	UBE2L6	0.150059066838744	3.31192263524685	1.26885831093717	0.250560678623507	0.999880997596556	-4.9075609616613
Q5T5D7	ZNF684	0.0485814998656161	3.31643875159521	0.282094665518652	0.787157384237716	0.999880997596556	-4.90768477275246
Q2TB10	ZNF800	-0.0738100343255919	3.30086961122241	-1.56959460826537	0.166538756027696	0.999880997596556	-4.90845049164389
A7XYQ1	SOBP	-0.109607191211649	3.2372093055666	-0.971375869647842	0.368129641110578	0.999880997596556	-4.90884726804562
Q9Y2B1	TMEM5	0.0401660628698481	3.30610450814986	0.260294031277993	0.803163692642928	0.999880997596556	-4.90906942791848
Q03060-15	CREM	-0.0757605986437137	3.32412034823272	-1.3058877428692	0.238472598768202	0.999880997596556	-4.90951719728481
Q9H892-2	TTC12	-0.0425191636862002	3.34052669414089	-0.360750123390089	0.730397755991344	0.999880997596556	-4.90971220618202
Q9NSU2-1	TREX1	-0.0743063519215573	3.33242108614213	-1.25196482872498	0.25625221611869	0.999880997596556	-4.90992586842907
Q96JS3	PGBD1	0.0902179424311189	3.32177901106568	1.22534333359347	0.265450217252343	0.999880997596556	-4.91091934441336
Q9NXL9-1	MCM9	0.0705327250886805	3.34137859375755	0.999526233463086	0.355362443089938	0.999880997596556	-4.91100776909399
O14709	ZNF197; ZNF660-ZNF197	-0.0986927726004767	3.3475609197561	-0.728704759367985	0.493081926034688	0.999880997596556	-4.91127221550013
Q15700-4	DLG2	0.0783668513454744	3.31438740554072	0.827219552961869	0.439133282753948	0.999880997596556	-4.91140016891319
Q5H9E4	SLC25A53	0.169321718756406	3.30000561533453	0.777208784240333	0.465973444855567	0.999880997596556	-4.91154610795707
Q8IYB3	SRRM1	-0.0510611356447314	3.32007546115922	-1.95223388839276	0.0977511105523785	0.999880997596556	-4.91163227288238
Q9H246	C1orf21	-0.0911709574503374	3.31030624260306	-0.799237759103408	0.45401112648365	0.999880997596556	-4.9120409149939
Q8IYY4-1	DZIP1L	-0.078482045618395	3.30730997993735	-0.792194784791787	0.457811787052174	0.999880997596556	-4.91252740238141
Q96LX8	ZNF597	-0.0703139685918422	3.32586073380408	-1.24423045855587	0.258895478995182	0.999880997596556	-4.91436460856952
Q9BVA0	KATNB1	0.0530042984181615	3.31938888166737	1.90493430393866	0.104435023366634	0.999880997596556	-4.91457523374593
P78310-1	CXADR	-0.0919794798830034	3.31516251479964	-1.18751982876246	0.279009256939455	0.999880997596556	-4.91483486039777
Q86WK6	AMIGO1	0.0961379890722637	3.32599865660041	1.11174817823545	0.307954285286005	0.999880997596556	-4.91485409860144
Q9H920	RNF121	0.0603470902284795	3.33216011950586	0.573012371613201	0.587033837014402	0.999880997596556	-4.91485782665134
Q14587-1	ZNF268	-0.0256300434121575	3.37041149669247	-0.170324870934918	0.870239805906645	0.999880997596556	-4.91510402978856
P51665	PSMD7	0.0585840162581177	3.34102620727293	1.96860531890678	0.0955387363444825	0.999880997596556	-4.91566474781768
Q14209	E2F2	0.082740948441933	3.34553989059863	0.973529333733954	0.367140394778882	0.999880997596556	-4.91569593876706
Q15113	PCOLCE	0.068130373126156	3.31775318281188	1.43292262557051	0.200865155029202	0.999880997596556	-4.9157110345237
P55055	NR1H2	0.131963812035062	3.32627350608963	0.891158694252329	0.406474031357986	0.999880997596556	-4.91597244171213
Q8NI08-2	NCOA7	-0.0478655292421952	3.31807868593936	-1.76780854955869	0.126481819597256	0.999880997596556	-4.91613337679099
Q96NB3	ZNF830	0.0673122041959329	3.32897684973144	1.82706365752687	0.116442391228967	0.999880997596556	-4.91621070561474
Q96F45	ZNF503	-0.0724514872922768	3.33061314187532	-1.67905577103171	0.143115394197643	0.999880997596556	-4.91664145529406
Q8WWZ7-1	ABCA5	0.0611870130797859	3.31613628500454	1.03084595658153	0.341574005134953	0.999880997596556	-4.91713442825717
P58317	ZNF121	-0.118699411929741	3.32634141945253	-1.52532776766348	0.177006687258285	0.999880997596556	-4.91767433157624
Q8N357	C2orf18; SLC35F6	0.122347418849563	3.2892838557372	0.870627757659914	0.416757969789732	0.999880997596556	-4.91901694803651
Q15493-1	RGN	-0.0485841321110504	3.3353415797318	-0.351738566444517	0.736815276638449	0.999880997596556	-4.91905086062319
P51511	MMP15	0.0826198417149116	3.32462922694692	1.28520995264985	0.245157685541645	0.999880997596556	-4.91916346709637
Q86V15-1	CASZ1	-0.0599648948758452	3.31453409212507	-1.99566259783817	0.0919919148605105	0.999880997596556	-4.91923949167422
P62633-3	CNBP	0.161873271279086	3.22598744515959	0.931925687449982	0.386622486553398	0.999880997596556	-4.91969688733665
Q8N370-3	SLC43A2	0.045514428268611	3.29021980791958	0.288003558014365	0.78283807782151	0.999880997596556	-4.92079641064891
Q10587	TEF	0.0932838418109014	3.33195614206733	1.16661454871842	0.28675497267081	0.999880997596556	-4.92128817495062
Q96S99	PLEKHF1	-0.0547407380864545	3.29920113100027	-0.510246189335535	0.627734042975001	0.999880997596556	-4.92164882037689
H0Y354	FAM72C	0.140540205449045	3.34061967654071	0.714635081356741	0.501141724370561	0.999880997596556	-4.92180365912238
Q9Y274-1	ST3GAL6	0.068703477082173	3.31288148054696	1.34296284695512	0.226890869469725	0.999880997596556	-4.92186231652968
P07686	HEXB	0.0538338282512044	3.32402311194796	1.68755502163332	0.14143505300209	0.999880997596556	-4.92205120020464
Q96SK3	ZNF607	-0.0807687397835985	3.32109341163005	-0.693106754366594	0.513643355578668	0.999880997596556	-4.92298450298234
Q9Y3D8	AK6; TAF9	0.105891276179448	3.35785309777984	1.4036208020537	0.209028028745994	0.999880997596556	-4.92301873026018
Q9H3W5	LRRN3	0.0579299624614179	3.28061578328467	0.585857085474395	0.578896969664037	0.999880997596556	-4.92530620269713
Q6IQ49-1	SDE2	-0.061038574813867	3.32173773711133	-1.92223310221781	0.101939207511208	0.999880997596556	-4.92634378646694
O94827-6	PLEKHG5	-0.00438389638262785	3.32563096851923	-0.0261826951926658	0.979943567838974	0.999880997596556	-4.92821484027245
Q9NR81-2	ARHGEF3	0.0715032363209987	3.34972776022249	0.801727029337989	0.452673193061955	0.999880997596556	-4.92835424501899
Q9UK73	FEM1B	0.0452109766102934	3.32217922539463	1.56616591644678	0.167328260993229	0.999880997596556	-4.92836377084187
Q96IZ5	RBM41	-0.0629498800234321	3.31900909390597	-1.42380914986884	0.203372202345399	0.999880997596556	-4.9306191031565
Q6PJT7-9	ZC3H14	0.162073673106568	3.32815273684272	1.19631718588641	0.275803558020619	0.999880997596556	-4.93089458330251
Q8IX04	UEVLD	0.104698837499706	3.36307196874404	1.10277802264309	0.311541880796432	0.999880997596556	-4.93090589748603
Q6ZMZ3	SYNE3	-0.0750903589595652	3.39115626139947	-0.499042007431508	0.635158273128494	0.999880997596556	-4.93214906728856
Q9NXU5	ARL15	0.0522624947386916	3.31240305806097	0.406787632059158	0.697992595562495	0.999880997596556	-4.93291697118918
O15060	ZBTB39	-0.0775323731141617	3.43895086049833	-1.34547873505409	0.226123472335849	0.999880997596556	-4.93349353174841
Q8N5J2-3	FAM63A; MINDY1	0.0153387724975282	3.36110619918606	0.104188787597368	0.920346417265042	0.999880997596556	-4.93479511594746
P02458-2	COL2A1	0.152146974432425	3.30888484877618	0.957869293868403	0.374381873964226	0.999880997596556	-4.93561530081767
Q9H0H5	RACGAP1	-0.0461313208500044	3.32835992761631	-1.89105102785359	0.106481982708018	0.999880997596556	-4.93589601051085
Q6XUX3-1	DSTYK	0.0610534171946302	3.32032803812554	1.12893585918148	0.301176263512615	0.999880997596556	-4.93622352537499
O14763	TNFRSF10B	-0.0650411447371858	3.30738918795707	-1.26414948220206	0.252135874684877	0.999880997596556	-4.93708052316154
Q6P0N0	MIS18BP1	-0.0786308392263247	3.31980775793792	-1.71727350015938	0.135707993448657	0.999880997596556	-4.9371520718145
Q9Y3B6	EMC9	0.0646831585941974	3.34456678752578	0.863546759897698	0.420349378340839	0.999880997596556	-4.9373957978742
Q96AA3	RFT1	0.0674222645736697	3.32923992271561	0.721007217957612	0.497480584973201	0.999880997596556	-4.93778218477324
Q86XK2-5	FBXO11	-0.0499819958609928	3.31440579224914	-1.58529972233052	0.162967192536888	0.999880997596556	-4.9377944839281
P11441	UBL4A	0.0420504284477446	3.31944426109267	1.61907249056268	0.155531175154101	0.999880997596556	-4.93794067690517
P15927-3	RPA2	-0.0484669625142131	3.32108532991747	-1.77870960609955	0.124573307745234	0.999880997596556	-4.93822424586057
Q96F25	ALG14	0.0671592595964121	3.33663799638349	0.683021283630543	0.51956994739356	0.999880997596556	-4.93858196648464
O60783	MRPS14	-0.138057056132188	3.30106604571649	-1.16073259848091	0.288967018692329	0.999880997596556	-4.93898254907218
Q96MT3	PRICKLE1	0.0985940885246681	3.31333331684676	0.847592058840101	0.42852515954633	0.999880997596556	-4.93902528628696
Q6ZTN6-3	ANKRD13D	-0.0711619644815555	3.3249338666896	-0.922098035262766	0.391338984008249	0.999880997596556	-4.93905877842807
Q52LA3	LIN52	0.141095602297663	3.30294859614373	1.36913012680695	0.219022527460728	0.999880997596556	-4.93918627515962
Q969R8	ITFG2	0.0483398415370668	3.33565375426156	1.56371082142604	0.167895749244525	0.999880997596556	-4.93992646887783
Q6PII5-2	HAGHL	0.0763945386126825	3.31221228045825	1.04689682301992	0.334676244674695	0.999880997596556	-4.93994692172305
Q96IK5	GMCL1	0.0659903937483598	3.30583769280607	0.571311228226309	0.588116472744387	0.999880997596556	-4.94134251536369
Q96DZ1	ERLEC1	-0.0475612072305105	3.32350122344834	-1.64235344168328	0.150594559360869	0.999880997596556	-4.94152275609359
Q8N972	ZNF709	-0.0895653212214846	3.34037796279967	-0.610822710666073	0.563274558463772	0.999880997596556	-4.9420304894549
Q96JF6	ZNF594	-0.0548971823360774	3.35405712045622	-0.481790259623571	0.646680573405325	0.999880997596556	-4.94231338971857
P51523	ZNF84; LOC100996464	-0.100242369009502	3.29284604264461	-0.890312492228709	0.406894099953059	0.999880997596556	-4.94284075627609
Q9H0I2-1	ENKD1	-0.0618499518203405	3.32597602022477	-1.0824327318725	0.319807432450703	0.999880997596556	-4.94288655917862
Q8TBF5-2	PIGX	-0.120857837680266	3.32357650398921	-1.14716924017275	0.29412298607481	0.999880997596556	-4.94410033347929
Q969M7	UBE2F	0.0662474552270026	3.3155255072774	1.3816014826496	0.215359748515407	0.999880997596556	-4.94461551941236
Q6UWU4-2	C6orf89	-0.134320275745563	3.32532836345278	-1.1679148132543	0.286267922720838	0.999880997596556	-4.94469417409649
Q53H82	LACTB2	0.0601685945812828	3.32706060835723	1.80105509192672	0.120748834015307	0.999880997596556	-4.94548804659472
O95260	ATE1	0.0294410684118603	3.34155627732741	0.219011389344346	0.833754623466812	0.999880997596556	-4.94576308941435
P50219	MNX1	0.0282851447772987	3.35707842787213	0.237730360597778	0.819840532534333	0.999880997596556	-4.94588613862818
Q96FV0	LRRC46	0.0191502274360855	3.34078945043639	0.164189477425516	0.874864560675751	0.999880997596556	-4.94589655522847
Q96B02-3	UBE2W	0.0590286159825003	3.31877682106023	1.19860885007408	0.274973694727708	0.999880997596556	-4.94624785325222
Q13564-4	NAE1	0.0628565012000396	3.3172745484632	1.8563180921603	0.111779142351467	0.999880997596556	-4.94646517017181
Q9H5I1	SUV39H2	-0.0839764733348135	3.31908357108881	-1.47220234308931	0.190381219457259	0.999880997596556	-4.9469917165739
P49281-3	SLC11A2	-0.229598941740425	3.30243946547902	-1.06932358272433	0.325228281914878	0.999880997596556	-4.94786277338077
Q9NP80-1	PNPLA8	-0.00452206069153391	3.30213632724975	-0.0270247589051578	0.979298711132529	0.999880997596556	-4.94840080672597
Q9NX47	MARCH5	0.118913084437712	3.3399609355347	1.30522628902556	0.238683919807136	0.999880997596556	-4.94851401107206
Q9UMX3	BOK	0.0318052326292113	3.34490140422608	0.288418083238577	0.782535381060177	0.999880997596556	-4.94917688974245
Q9UJU2-1	LEF1	0.0790131242453927	3.32222610570422	0.731826981641523	0.491305275162442	0.999880997596556	-4.94999848293513
Q96PV4	PNMA5	0.0760336537467734	3.33905344750734	0.760389192859683	0.475254309751009	0.999880997596556	-4.95007041386692
O00559-2	EBAG9	-0.0946767235753846	3.3067160544978	-1.20170086023658	0.273857407217947	0.999880997596556	-4.95085947039947
Q12926	ELAVL2	-0.0491829114316085	3.32832782813011	-1.6982696626048	0.13934381392981	0.999880997596556	-4.95097160099329
Q96CS7-2	PLEKHB2	-0.0770750247019686	3.3296832113839	-0.664212929964555	0.53074056377686	0.999880997596556	-4.95109669125451
O95278	EPM2A	0.0668589722240388	3.35103152048428	0.716582040424267	0.500021184401936	0.999880997596556	-4.95141760640603
Q9UKJ3-1	GPATCH8	-0.0493512987728844	3.32644740135179	-1.98464770872918	0.0934195566382081	0.999880997596556	-4.95176491161796
Q96DR4	STARD4	0.120287821832757	3.33699230301475	1.49319573636046	0.184987551121351	0.999880997596556	-4.95221124707809
Q9UJ68-1	MSRA	-0.050427739490492	3.33721422309039	-1.42421691149986	0.2032594208918	0.999880997596556	-4.9530871951685
Q8WUF5	PPP1R13L	0.0702007997894904	3.3135508146039	1.32424150144	0.232674870502322	0.999880997596556	-4.95390967000208
P50548	ERF	0.0795726920530205	3.33004594837401	1.52221984268624	0.177764349271929	0.999880997596556	-4.95414238671145
Q92800-2	EZH1	0.0344619318371256	3.33525847117246	0.297191669753096	0.776138510921818	0.999880997596556	-4.95427982313012
O60256-1	PRPSAP2	0.0410809651992931	3.31869636222771	1.77187279599047	0.125766950729166	0.999880997596556	-4.95572237363544
P35612-1	ADD2	-0.126941632466348	3.30890038420853	-1.84018788852515	0.114327068011764	0.999880997596556	-4.95705151672859
P85037-1	FOXK1	-0.0461174642455782	3.32520943227546	-2.01732205643549	0.0892483618787976	0.999880997596556	-4.95738258383679
Q8IZ07	ANKRD13A	0.0781059506977865	3.31516942154113	1.43608891397436	0.200000783917223	0.999880997596556	-4.95747788010566
Q9Y5W9	SNX11	-0.0548748374032721	3.33634173525604	-1.45109025466079	0.195951774991369	0.999880997596556	-4.95765823281325
Q9NSD4	ZNF275	-0.00542797891075252	3.34358614905069	-0.0380915758444398	0.970825471890671	0.999880997596556	-4.95766012134068
P17020	ZNF16	-0.0682929431450337	3.32065125293741	-1.26715266949415	0.251130249150555	0.999880997596556	-4.95774023578483
O14657	TOR1B	-0.0549158531635932	3.32225488868903	-1.46352399202834	0.192653121025856	0.999880997596556	-4.95838880525824
Q96BU1-1	S100PBP	-0.0593279656575607	3.31965272160223	-1.18671512634007	0.279304071303144	0.999880997596556	-4.95900609436815
Q0D2K2	KLHL30	-0.0252203334459014	3.31347890565993	-0.228196667847148	0.826918498335113	0.999880997596556	-4.95912254964846
Q9P2R3-4	ANKFY1	0.0357349867780382	3.33655008260881	2.00434082880134	0.0908826050721675	0.999880997596556	-4.95944228356706
Q8WW59	SPRYD4	0.060649650840799	3.32744266364983	1.57626103824628	0.165013771818599	0.999880997596556	-4.95988501859628
Q96T66-1	NMNAT3	0.0482856067522803	3.28918472072167	0.505641055218831	0.630779867528714	0.999880997596556	-4.95990570181106
Q93008-3	USP9X	0.0572711289692384	3.31777246966322	2.26326568079584	0.0633512466564777	0.999880997596556	-4.95996631084325
Q13303-2	KCNAB2	0.0493484553348137	3.338468020914	1.4051444887801	0.208596211341854	0.999880997596556	-4.96034528469942
Q08499-1	PDE4D	0.0612679165965696	3.31229332452688	1.0287288636093	0.34249231414607	0.999880997596556	-4.96055642839013
Q6P280	ZNF529	-0.0755160434345238	3.30982819519606	-0.954491586377861	0.375958291442508	0.999880997596556	-4.96085456837227
Q5XPI4	RNF123	0.0639939635865854	3.31838548165762	1.67458770984116	0.144006443820995	0.999880997596556	-4.96099036677697
O75113	N4BP1	0.0359218205485626	3.32087031425309	1.78710153989643	0.123123296956684	0.999880997596556	-4.96109530832806
Q9Y6N8	CDH10	-0.00913107030581381	3.33340095718187	-0.0745907918625043	0.942916033162426	0.999880997596556	-4.96151751509683
P51606-1	RENBP	0.060843280249345	3.31575032380777	1.27384341751283	0.248902483059779	0.999880997596556	-4.96207842181909
Q9Y3A4	RRP7A	0.0405844694079127	3.32825316400427	1.65722476125807	0.147519976997763	0.999880997596556	-4.96228707728787
O43909	EXTL3	0.0757752349862892	3.31636368607356	1.21785763915555	0.268087657557264	0.999880997596556	-4.96251165845513
Q6ZV89-1	SH2D5	0.0583902583058726	3.31247708211916	1.16429355571016	0.287626114119157	0.999880997596556	-4.96278325022583
Q9UPR0-1	PLCL2	0.0621494016270487	3.32214290859102	1.70406857555954	0.138224491615142	0.999880997596556	-4.96301519266136
Q0P6H9	TMEM62	-0.0196052887475904	3.30077815225963	-0.116352448580988	0.911093258891192	0.999880997596556	-4.96341869115061
Q6ZVM7	TOM1L2	0.0568478394005292	3.32132966630786	1.40869763103415	0.207592395017215	0.999880997596556	-4.96403583100336
Q8IUW3	SPATA2L	0.0582125106171695	3.34085565177166	0.705088027923374	0.506660594517919	0.999880997596556	-4.96497443409651
Q9P107	GMIP	0.114652357629089	3.34098731598647	1.41043953562071	0.207101890618528	0.999880997596556	-4.96499762345343
Q8N5I2	ARRDC1	0.0449347337629868	3.35320634577912	0.435298215288668	0.67826161836884	0.999880997596556	-4.96516083422698
P05155-3	SERPING1	-0.0617814492159815	3.29992270725751	-0.802840764843737	0.452075491474939	0.999880997596556	-4.96577156173648
Q5HYI7	MTX3	0.0801074466115432	3.33606681999514	1.6564922459473	0.147670002304886	0.999880997596556	-4.96582830900763
P04062	GBA	0.0758990467302019	3.33044534048664	1.846603758854	0.113306818414644	0.999880997596556	-4.96606694356222
P15848	ARSB	0.115957701762765	3.31362371792585	1.56439024853912	0.167738520223868	0.999880997596556	-4.96638819362969
Q9NUP1	BLOC1S4	-0.0546928406328772	3.32945032272515	-1.34953083692314	0.224892392940582	0.999880997596556	-4.96664588582131
Q8TB96	ITFG1	0.0927777684059404	3.30821513832414	1.17998381260512	0.281780632199491	0.999880997596556	-4.9673734956226
Q9ULX5-2	RNF112	0.0576688779138295	3.35941005022904	0.443754605173967	0.672461471703031	0.999880997596556	-4.96785827538619
Q14106	TOB2	-0.087584531436231	3.33723902547741	-1.00861895056204	0.351314396398168	0.999880997596556	-4.96793075344809
P35790	CHKA	0.0620888468558483	3.3207287277654	1.74067535545834	0.131356917668002	0.999880997596556	-4.96797019150547
O76050-2	NEURL; NEURL1	0.0131852522070206	3.34681893764414	0.115897721379601	0.911438916073212	0.999880997596556	-4.9684035849773
Q8NC26	ZNF114	-0.0736944574110203	3.30469097885639	-1.25955022002096	0.253682792440224	0.999880997596556	-4.9687943912912
Q8WVD5-1	RNF141	0.0846698879872388	3.33365731111815	0.827089763073082	0.439201470718675	0.999880997596556	-4.96925994493829
P09105	HBQ1	-0.0353894241758159	3.31495099017676	-0.357824527378696	0.73247862290802	0.999880997596556	-4.96976693109413
Q9NZZ3	CHMP5	0.0685774658260007	3.31780164130069	1.5843834242451	0.163173565717977	0.999880997596556	-4.97006425274931
Q96EF0-1	MTMR8	-0.0371366670653293	3.37669234579341	-0.352171622245012	0.736506343465856	0.999880997596556	-4.97097185980624
O60674	JAK2	-0.00994337377799764	3.32044199870582	-0.0758270617881237	0.941972010866343	0.999880997596556	-4.97152391176171
Q96DP5	MTFMT	0.0635586386343737	3.30590743784955	1.23371783997452	0.262526288018525	0.999880997596556	-4.97202795739378
Q9NWA0	MED9	0.35142318760111	3.20485490541518	1.28344587301023	0.245735601630865	0.999880997596556	-4.97231294898699
Q96HA1-1	POM121	-0.0856473530315144	3.33010718358955	-0.866931641203151	0.418629751441943	0.999880997596556	-4.9736298954909
Q32NB8	PGS1	0.0567027891750462	3.32105846103497	1.09530647094095	0.314556526403707	0.999880997596556	-4.97369421199587
Q8TAG5-2	VSTM2A	-0.0569046786433142	3.30247550076247	-0.571752272277546	0.587835673315387	0.999880997596556	-4.97477429063966
Q8IXK0-5	PHC2	-0.0611782808761668	3.31149659654718	-1.67145663444342	0.144634041432939	0.999880997596556	-4.97496630485259
Q9BRK5-1	SDF4	0.067104631861245	3.31736941677006	2.00279351893501	0.0910794012129246	0.999880997596556	-4.97539053907181
Q07820	MCL1	0.0805486765239672	3.31579990095139	1.31950798076046	0.234157997929311	0.999880997596556	-4.97579527213672
Q8IYN0	ZNF100	-0.0702023259108767	3.33053910414351	-1.01420071005785	0.348847684120088	0.999880997596556	-4.97628329387094
Q9H4A5	GOLPH3L	0.0755902950693855	3.32576182882192	1.57101266773051	0.166213256539361	0.999880997596556	-4.97849467022865
Q9BRJ7-1	NUDT16L1	0.117764764412644	3.35570127239432	1.37056117095952	0.218599396547753	0.999880997596556	-4.9789419149152
Q9Y4D2	DAGLA	0.0641014791585411	3.30946484231434	0.578272112570072	0.58369382558248	0.999880997596556	-4.97974591473926
P46934-4	NEDD4	0.0408191966281145	3.32443503688893	1.63400927648405	0.152346442091057	0.999880997596556	-4.9799439584482
A6NI28	ARHGAP42	0.0506463759343169	3.33325811659368	1.55257840045462	0.170491808766688	0.999880997596556	-4.98028619592922
Q9Y5Q0	FADS3	-0.0384065429740181	3.33449558237117	-0.400550144066722	0.702344560625647	0.999880997596556	-4.98042675216252
P06865	HEXA	0.0579307220225063	3.33861115384771	1.51554548663317	0.179401707006222	0.999880997596556	-4.98059636618521
P55036-1	PSMD4	0.0564423582060234	3.32870899172697	1.4326860812849	0.20092986701878	0.999880997596556	-4.98083361430225
A5PKW4	PSD	-0.058822562826467	3.31453268211578	-0.759218497234952	0.475905021775781	0.999880997596556	-4.98130784433697
Q8WVY7	UBLCP1	0.0574758070649549	3.33020408343663	1.86252540779835	0.1108136633343	0.999880997596556	-4.98202416763664
P57060	RWDD2B	0.0983317160040934	3.35458116961498	0.635897057260049	0.547844829685474	0.999880997596556	-4.98226852111132
Q969K3-2	RNF34	0.131517980365786	3.32816469837673	1.33666860849231	0.228820973167379	0.999880997596556	-4.98228226989251
Q96IR2	ZNF845	-0.0382387698051309	3.30396758969346	-0.369548879450893	0.724154661638837	0.999880997596556	-4.98246918853984
Q9BTT6	LRRC1	-0.0772791268861574	3.2871677689776	-0.68025888045407	0.521200973795606	0.999880997596556	-4.98288062001852
O14594	NCAN	-0.0593109154675762	3.32144716297873	-0.865369444536532	0.419422748132207	0.999880997596556	-4.98297462510209
Q96KM6	ZNF512B	-0.22091813460401	3.25490737547065	-1.44632439298142	0.197229885789317	0.999880997596556	-4.98303940832068
Q9H2E6-2	SEMA6A	-0.12995144605913	3.29780802486183	-1.27012618402017	0.250138028626393	0.999880997596556	-4.98316905079024
Q13796	SHROOM2	0.0544211677546658	3.32863954435603	0.565001156372416	0.592142446503199	0.999880997596556	-4.98335874893841
P56134	ATP5J2	-0.0533850969257692	3.28440824126767	-0.290765061765561	0.780822342949626	0.999880997596556	-4.98371693785094
Q15560	TCEA2	-0.113842300398825	3.30437142653749	-0.839437670932124	0.432748540342427	0.999880997596556	-4.98392235685347
Q99759-2	MAP3K3	-0.0617727885315815	3.32228576710039	-1.04298009081595	0.336348949000419	0.999880997596556	-4.9842066515088
Q96MP5	ZSWIM3	0.0632754878826776	3.34457374018734	0.895792466313718	0.404179531854643	0.999880997596556	-4.98425420293619
Q96KS0-1	EGLN2; RAB4B-EGLN2	0.0233123288159766	3.33625066917102	0.15211693219794	0.883980218452815	0.999880997596556	-4.98429400780953
O60725	ICMT	-0.112687168716994	3.318919609825	-0.826168962896434	0.439685453220375	0.999880997596556	-4.98461301367846
Q9Y2G3	ATP11B	0.0615726425155907	3.33600496120063	0.971451700093472	0.368094771080147	0.999880997596556	-4.98509346990175
P55060-1	CSE1L	0.0995029641692749	3.3301013126178	2.46800848908114	0.0477610979234896	0.999880997596556	-4.98528734264687
Q8NB78-1	KDM1B	0.0494659188912832	3.31933277430247	1.72974857736318	0.133371395564546	0.999880997596556	-4.98535228207544
O75037	KIF21B	0.0702635540144421	3.30216772819749	0.614711364797239	0.560864393355953	0.999880997596556	-4.98614782246741
Q9UKY4-1	POMT2	-0.0475077669263725	3.35561669677346	-0.374734866420865	0.720485752496503	0.999880997596556	-4.9862773274855
Q8NF99-1	ZNF397	-0.087995477859199	3.32458734657592	-0.973062262291958	0.367354778178845	0.999880997596556	-4.98628241147093
Q9BQ49	SMIM7	0.189715091072584	3.31286129559667	1.05988505302053	0.329177687903467	0.999880997596556	-4.98718041912811
Q7Z6V5-1	ADAT2	0.079762754917333	3.31944353523166	1.28041364099786	0.246731773746581	0.999880997596556	-4.98766417976663
P41586-4	ADCYAP1R1	0.0699240576483443	3.28980137785463	1.0748885154802	0.322917952156921	0.999880997596556	-4.98774745624305
Q7Z3D4	LYSMD3	-0.0729257676690165	3.33941473191375	-0.642695533533182	0.543706992398021	0.999880997596556	-4.98775285960354
P42702-1	LIFR	0.0852918803688686	3.30614249166243	0.96514681835286	0.371002866721846	0.999880997596556	-4.98785864318874
Q9NX05-1	FAM120C	-0.0569291674608375	3.31463356309983	-0.647849418497519	0.540583215742576	0.999880997596556	-4.98797302466438
Q14188	TFDP2	0.0346004487346517	3.3351145167171	0.321309318701915	0.7586540619726	0.999880997596556	-4.98837678833909
O75129	ASTN2	-0.0686394765619951	3.32819958014555	-1.44899270883345	0.196513353778948	0.999880997596556	-4.98860800483827
Q9BYI3-1	FAM126A	0.0223072215690965	3.29306425498821	0.144450108941719	0.889779409054605	0.999880997596556	-4.98877058679475
P49768-1	PSEN1	-0.0588223814180343	3.30775054301873	-0.430425216431501	0.681614940998443	0.999880997596556	-4.98882840984817
Q96NL8	C8orf37	0.035554113941332	3.31745101041928	0.289485596519453	0.781756047280239	0.999880997596556	-4.98883569013627
Q86TN4	TRPT1	-0.0784752874880502	3.3344300710374	-1.31431323561528	0.235795323965845	0.999880997596556	-4.98891574695371
Q9UIU6	SIX4	0.0244182469652158	3.32917839893043	0.245532500077042	0.814061807996799	0.999880997596556	-4.98920748843807
O00391	QSOX1	-0.0141896836780309	3.35539692671984	-0.125831165231455	0.903893044329149	0.999880997596556	-4.98941633383583
P61457	PCBD1	0.0827495976335886	3.30340504128317	1.33140629620191	0.23044590473688	0.999880997596556	-4.98957050503143
Q9P206-2	KIAA1522	-0.00439751510571943	3.31469118538323	-0.0266225180844562	0.979606747117899	0.999880997596556	-4.9900304248175
O60347	TBC1D12	-0.0597774417769136	3.33648314555246	-0.931564833526447	0.386794892917273	0.999880997596556	-4.99020612557129
Q5TAP6	UTP14C	0.00787939738451053	3.3150074628283	0.0652938234253039	0.950018373114257	0.999880997596556	-4.99069985709598
Q86YH2	ZNF280B	-0.0632042641956237	3.31506176009586	-1.09347318523585	0.315299904531809	0.999880997596556	-4.9911320748067
Q8WZ82	OVCA2	-0.0818264808550156	3.34645526632111	-1.14181410952116	0.296179961547473	0.999880997596556	-4.99124700386197
Q96BZ9-3	TBC1D20	0.0904660959826164	3.3171874948599	1.03035224705252	0.341787978806397	0.999880997596556	-4.99142407108661
P51843	NR0B1	0.000967551037261868	3.34686408023009	0.0092504439094304	0.992913163516903	0.999880997596556	-4.99164692665029
Q96NI8	ZNF570	-0.0682092438394107	3.31800464257717	-0.922159119806621	0.391309532840287	0.999880997596556	-4.99173094313459
Q93045	STMN2	0.0761290566623464	3.31173827244322	1.49212353801606	0.185259550405591	0.999880997596556	-4.99205638874794
Q9BV29-2	C15orf57; CCDC32	0.114300138258528	3.30810357661064	0.938795260136748	0.383351648370288	0.999880997596556	-4.99214188731112
Q7Z699	SPRED1	-0.0286799527976068	3.32842071009536	-0.267010035997557	0.798221175480559	0.999880997596556	-4.99216020978392
Q9NPE2-2	NGRN	0.0526182399957233	3.32246702576195	1.32641541964695	0.231996540170031	0.999880997596556	-4.99222305812639
Q7LG56-6	RRM2B	0.0651506701391913	3.30786872522897	1.44306298364294	0.198108945934238	0.999880997596556	-4.99223347866097
P57775	FBXW4	0.054860502017617	3.32158472166291	0.607186869333106	0.565533717485789	0.999880997596556	-4.99237084683685
Q9NQ31-1	AKIP1	-0.0315119484647633	3.323871165201	-0.304486819120161	0.770834097609427	0.999880997596556	-4.99272684575406
O95466-2	FMNL1	0.0355469472189198	3.36457351378725	0.345487592705152	0.741280544027494	0.999880997596556	-4.99294963665922
Q5D1E8	ZC3H12A	-0.0490747008980995	3.34159596897409	-0.487100546155424	0.643122270265697	0.999880997596556	-4.99309561231476
Q8NCP5	ZBTB44	-0.0536512224595272	3.33487396212112	-0.615272338590647	0.560517224932745	0.999880997596556	-4.994363908009
Q4VCS5	AMOT	0.0578642318040859	3.32928402409319	1.18794479312548	0.278853672550645	0.999880997596556	-4.9947794891311
P49842-1	STK19	0.125076578196913	3.34471240381303	0.707100253082309	0.505494044281655	0.999880997596556	-4.99537603276552
Q3MJ62	ZSCAN23	0.0955947691472654	3.33853410407612	1.177376237899	0.282745026805012	0.999880997596556	-4.99621447993934
Q9C0C7-1	AMBRA1	0.0256700309553065	3.34782657445994	0.253066942794508	0.808493440630917	0.999880997596556	-4.99730242589734
P07199	CENPB	0.0678003484359121	3.33673997919127	1.6507537791338	0.148850361166542	0.999880997596556	-4.99737536683538
P43155	CRAT	-0.0699637017471235	3.30570790621965	-1.18017772206717	0.281709028282066	0.999880997596556	-4.99761394726436
P54252	ATXN3	0.0654997885435093	3.30684180412371	1.28836978390242	0.244125515220916	0.999880997596556	-4.99766108320234
Q5T2E6-1	C10orf76	0.0541387775613862	3.31701693023472	1.43467269239489	0.200386978388997	0.999880997596556	-4.99785006308677
Q86UT6	NLRX1	0.0411064062893443	3.33645063830068	0.424055924022669	0.686009905509894	0.999880997596556	-4.99787240289594
O94986-4	CEP152	-0.0370324856857307	3.31665006054814	-2.03631179737509	0.0869109466926654	0.999880997596556	-4.99799489183852
Q5PSV4	BRMS1L	-0.0596150853414125	3.31485440376594	-1.44844912368656	0.196659130029293	0.999880997596556	-4.99825931658524
O95159	ZFPL1	0.0506634879826263	3.31848289170499	1.56414409248781	0.167795468162673	0.999880997596556	-4.99827883717069
Q9H0F6-1	SHARPIN	0.062040363187882	3.32155413388854	0.807149442277535	0.449768475769308	0.999880997596556	-4.99841765032904
O15527-4	OGG1	0.0733294508713574	3.33697669869575	0.943648881626312	0.381053564634182	0.999880997596556	-4.9986312705569
Q9BYH1-1	SEZ6L	-0.0745106586309288	3.33345454305858	-1.11840080914512	0.305315845400622	0.999880997596556	-4.9986691990536
Q53EQ6-1	TIGD5	-0.0375732374067773	3.35289554517238	-0.344798954979073	0.741773136280135	0.999880997596556	-4.99890841510662
P84101-1	SERF2	0.127169351098989	3.29265755858034	1.1294725449229	0.300966645247094	0.999880997596556	-5.00027444481022
Q9BXP2-1	SLC12A9	-0.0350980084284495	3.29940613504555	-0.261812227855958	0.802045525785102	0.999880997596556	-5.00173775806135
Q05682-5	CALD1	-0.163852707141302	3.32092210127961	-1.39525181864868	0.21141436023576	0.999880997596556	-5.00174987007051
O00399	DCTN6	0.0592283457033216	3.32302621616989	1.34051711678842	0.227639103932196	0.999880997596556	-5.00193961567335
Q00013-1	MPP1	-0.062019532580121	3.32582714820297	-1.2528102661135	0.255964716508191	0.999880997596556	-5.00209535924411
Q16563-2	SYPL1	-0.0805054263520274	3.33670331572371	-0.422598368761147	0.687017547952513	0.999880997596556	-5.00249552240224
Q96K21	ZFYVE19	-0.126605752299248	3.32103703113527	-1.02486281880219	0.344174372934254	0.999880997596556	-5.00300362406778
Q9BWJ5	SF3B5	0.404726858930445	3.27800725839704	1.74964756989738	0.129724935726351	0.999880997596556	-5.00328099453609
Q7Z628	NET1	-0.0641188070324639	3.32185905733292	-1.48952983407299	0.185919068088156	0.999880997596556	-5.00381183962627
Q6IA86-6	ELP2	0.0656226122501847	3.33075804224655	1.75037686498301	0.129593152912284	0.999880997596556	-5.00383804284258
Q9HCB6	SPON1	-0.0426384044944114	3.32295689284317	-0.473803487178068	0.652051545555559	0.999880997596556	-5.00390613512806
Q8N3D4	EHBP1L1	0.00412014664606439	3.35595365021655	0.0378708030957576	0.970994468572012	0.999880997596556	-5.0043216575663
Q9NYF3	FAM53C	0.0655968094569291	3.32263423381076	1.25115038609907	0.256529442328465	0.999880997596556	-5.00469668789814
Q86T03-2	TMEM55B; PIP4P1	0.126487287684179	3.30725062184197	1.13856513973301	0.297433827913876	0.999880997596556	-5.00502223298415
Q96MH2	HEXIM2	0.0742484557581766	3.32419924347173	0.864540876490507	0.419843794173357	0.999880997596556	-5.00509521962173
O43763	TLX2	-0.0624079757320939	3.35746014042798	-0.661917527257661	0.532114315654838	0.999880997596556	-5.00518756171804
Q9Y2Q5	LAMTOR2	0.0573223757727528	3.32356667796732	1.63844042501426	0.151413697235207	0.999880997596556	-5.00587328160114
P13473-3	LAMP2	-0.0171800353857399	3.31925096617229	-0.165551277074733	0.873837586421804	0.999880997596556	-5.00654820260807
P06737-1	PYGL	0.0601353140303719	3.32695100427366	1.03457126012022	0.339962937083311	0.999880997596556	-5.00667707477692
O60308	CEP104	-0.0455245719246342	3.31466434162677	-0.409641079409076	0.696005868093759	0.999880997596556	-5.00675185373731
Q8N3V7-2	SYNPO	0.0149554349559345	3.3244896024252	0.14609093815242	0.888537645034981	0.999880997596556	-5.00686538178226
Q96IW7	SEC22A	0.059240255707482	3.29377036558417	1.19345351169562	0.276843578680468	0.999880997596556	-5.00755351651274
O96018	APBA3	-0.0324625080519262	3.31754702972045	-0.341388400653359	0.744214717023599	0.999880997596556	-5.0093004292774
Q8TF68-1	ZNF384	-0.124864183233237	3.32357240313334	-1.17648279989408	0.283076105803854	0.999880997596556	-5.00957210372361
P17081	RHOQ	0.0708751003572309	3.32485756710788	0.68660632998722	0.517458157006678	0.999880997596556	-5.01016522956148
P51178-2	PLCD1	0.00395827387291032	3.28665941711979	0.0395017095166314	0.969746084988998	0.999880997596556	-5.01049541426821
Q6ZSY5	PPP1R3F	-0.366166870471618	3.20448936069604	-0.750920853642487	0.480534752136577	0.999880997596556	-5.01064731182071
Q70UQ0	IKBIP	0.0630358208249594	3.32807960846968	1.26847150803142	0.250689745501597	0.999880997596556	-5.01147300837376
Q5VV52-3	ZNF691	-0.0884207871056231	3.32354443197902	-1.27485962459532	0.248565648074105	0.999880997596556	-5.01175194970728
Q8TCS8	PNPT1	-0.0380528533053981	3.30112144731629	-2.15777812103189	0.0733595200811316	0.999880997596556	-5.01190911525876
Q9NSY1	BMP2K	0.0682139102636931	3.31685827496669	1.43519436027994	0.200244643421289	0.999880997596556	-5.01280742101435
Q16880	UGT8	-0.153596772161417	3.3275527316444	-0.852401343224086	0.426048495019819	0.999880997596556	-5.01303565356575
O43184-1	ADAM12	-0.037761900139514	3.31676218758017	-0.326580028947022	0.754853185869381	0.999880997596556	-5.01387904743719
Q969S8-1	HDAC10	0.0266413057805736	3.34190694443451	0.230300413468891	0.825355090941982	0.999880997596556	-5.01408522183297
P50579	METAP2	-0.0964361330612574	3.31240732193248	-1.51585669431634	0.179325049243611	0.999880997596556	-5.01429166393043
Q9Y2D9	ZNF652	-0.0663470106727356	3.33547139594985	-0.846582821415298	0.429046229505425	0.999880997596556	-5.01435258435333
Q7Z3I7	ZNF572	0.126311985161804	3.28925883260663	0.603150641342257	0.568048076204947	0.999880997596556	-5.01447535183017
P23921	RRM1	0.0460978945346794	3.33218391746224	2.27179708264674	0.062605967803695	0.999880997596556	-5.01448671561645
Q86U28	ISCA2	0.0569402622329953	3.30373069121118	1.14363510204026	0.295479138723685	0.999880997596556	-5.01449596982002
P10276	RARA	-0.0711676127324842	3.3144031448543	-1.21243985395731	0.270010609921991	0.999880997596556	-5.01462760237531
Q8N3T6	TMEM132C	-0.0156543013535328	3.3502090138353	-0.147928503192507	0.887147402898938	0.999880997596556	-5.01483371287928
Q86UX6	STK32C	0.0580800517965265	3.31228935019452	0.679446504458467	0.521681262652329	0.999880997596556	-5.01511391773518
O95873	C6orf47	-0.0145228206569539	3.34475128938383	-0.144861489188363	0.889468048177707	0.999880997596556	-5.01518603127636
Q9UM47	NOTCH3	-0.00480868426357021	3.31944894929279	-0.0462044984445831	0.96461643341524	0.999880997596556	-5.01562279100068
Q5RHP9	C1orf173; ERICH3	-0.0891143895222876	3.3317375362039	-1.41842559894205	0.204866596043094	0.999880997596556	-5.01620205030373
Q9NVR7	TBCCD1	0.0705926899025278	3.32008268210491	1.15406261009126	0.291492908371698	0.999880997596556	-5.01654159420215
Q8IYL2	TRMT44	0.0590025086133405	3.30646950830993	0.734650240245731	0.489702478774463	0.999880997596556	-5.01673105812216
Q6UN15-1	FIP1L1	-0.0101455104432899	3.3244593145912	-0.100236586006172	0.923355950757127	0.999880997596556	-5.01822604040964
Q8TAS1	UHMK1	0.0596487209273831	3.31359153156513	0.512849168650847	0.626015963773615	0.999880997596556	-5.01832156093965
Q9ULX9-1	MAFF	-0.0879414882025559	3.28483131333182	-0.246767975174297	0.813147900972578	0.999880997596556	-5.01838133146992
Q6P1J9	CDC73	0.0365446668248049	3.32940316819511	2.02041813113206	0.0888629850557064	0.999880997596556	-5.01860218921033
P51911	CNN1	0.0593922034001216	3.31552236451052	1.12275000802446	0.303601167154442	0.999880997596556	-5.01862330252855
Q9HAT8	PELI2	-0.0775313845122853	3.33674314323746	-1.25171779052005	0.256336277213871	0.999880997596556	-5.01883110082448
O15144	ARPC2	0.0843133750930176	3.3317455164777	1.93107104114139	0.100687143908659	0.999880997596556	-5.01904306601287
Q9NQ87	HEYL	0.0569818208275753	3.31876800924152	0.761253269849891	0.474774421407196	0.999880997596556	-5.02037202953588
Q96PU8	QKI	-0.0495570369610842	3.30879977742706	-1.81250009208131	0.118834840153484	0.999880997596556	-5.0212936324063
Q68E01-2	INTS3	0.046785320200466	3.31795208377389	1.92036962118167	0.102205182001378	0.999880997596556	-5.02137339330157
Q9UKV3-5	ACIN1	-0.24057590187246	3.3567778305435	-1.03245415653198	0.340877759643444	0.999880997596556	-5.02210497925956
Q6EMB2	TTLL5	-0.0650627980695282	3.32024889975734	-0.877134265888055	0.413478077131184	0.999880997596556	-5.02216938781166
Q86WA6	BPHL	0.0520069057672018	3.30648357153157	1.50654946205992	0.181630901948763	0.999880997596556	-5.02271029219651
Q5TID7	C1orf114; CCDC181	-0.0481536996864957	3.31707601825249	-0.483683814660238	0.645410568914122	0.999880997596556	-5.02289367305475
Q5RL73-2	RBM48	0.030454362922931	3.30717030839564	0.278745282328531	0.789609414675814	0.999880997596556	-5.0245042268021
Q13370	PDE3B	-0.0571445718991913	3.34391221793111	-0.662461721881752	0.53178842103056	0.999880997596556	-5.02467041499849
Q6PID8-1	KLHDC10	-0.0337390930750357	3.2984337207279	-0.372826468286609	0.721834942114038	0.999880997596556	-5.0249210668212
Q7L1V2	MON1B	0.0807452848835533	3.32808274712309	1.28885474120728	0.24396744217238	0.999880997596556	-5.0250427347888
Q5FWE3-1	PRRT3	-0.00655329123746113	3.32158017196042	-0.057092114740079	0.956288183919853	0.999880997596556	-5.02517127154527
Q86XJ1	GAS2L3	0.0340156865840376	3.32771381425791	0.270456690531818	0.795688613512428	0.999880997596556	-5.02528045324609
Q8N6M3	FITM2	-0.0628835701439357	3.35465396645863	-0.570423008960302	0.58868221226829	0.999880997596556	-5.02564210626162
P30926-1	CHRNB4	0.00803712812737973	3.31547743056439	0.0536858125982554	0.958893169019444	0.999880997596556	-5.02571105492642
O00625	PIR	0.0503064763042883	3.31412896538656	1.68098149161901	0.142732993465559	0.999880997596556	-5.02579752818875
Q9NW61	PLEKHJ1	0.0189766180014748	3.36022826021758	0.177661498799069	0.864716938809634	0.999880997596556	-5.02621383497741
Q8NBX0	SCCPDH	-0.0956216267871706	3.32027890389561	-1.45288890498463	0.195471396934923	0.999880997596556	-5.02689022350469
Q9NRW3	APOBEC3C	-0.0113074392528995	3.33330645890702	-0.0981470141174013	0.924947686857917	0.999880997596556	-5.0272768324904
Q5BJH7	YIF1B	-0.0538530982551456	3.29955214026652	-0.32170491578646	0.758368527271788	0.999880997596556	-5.02746157399144
Q15797	SMAD1	-0.13190962027463	3.31063699778177	-0.916897099501065	0.393852767240398	0.999880997596556	-5.02764303128443
Q8N4B1-4	FAM109A	0.0240117938728139	3.33889515025526	0.243442890873204	0.815608262222779	0.999880997596556	-5.02770505982557
Q9BYX2	TBC1D2	-0.0309677910633618	3.32758764714782	-0.322124948113021	0.758065401158043	0.999880997596556	-5.02890498606546
Q9Y620-1	RAD54B	0.0682610483422443	3.31616632721137	1.76675637911124	0.126667533819666	0.999880997596556	-5.02898551823172
Q9BVM4	GGACT	0.0559395546257459	3.34687251428824	0.698906987430936	0.510255075787932	0.999880997596556	-5.02959154651449
O15131	KPNA5	-0.0387017487414183	3.27934998916785	-0.350663989361252	0.737582089658644	0.999880997596556	-5.02988272106558
Q08AN1	ZNF616	-0.00275641891576159	3.3484709197417	-0.0230901549610757	0.982311988818851	0.999880997596556	-5.03057373033062
Q04727-1	TLE4	0.0998332491871176	3.32922491401241	1.27797083134152	0.247536889942358	0.999880997596556	-5.03099952810128
Q9H903-4	MTHFD2L	0.0573571019885011	3.29784822515206	0.626450846724874	0.553626648611231	0.999880997596556	-5.03101515661351
O15265-2	ATXN7	-0.0194677367680185	3.34311701029731	-0.184825352190717	0.859332162940142	0.999880997596556	-5.03127523186621
Q9Y2G1	C11orf9; MYRF	0.0542336912023356	3.30995770325429	1.11373365650689	0.307164860896874	0.999880997596556	-5.03149930671414
O14508	SOCS2	0.0394527784905578	3.35758585762314	0.45115451179188	0.667406025340144	0.999880997596556	-5.03157239891851
Q6PCB0	VWA1	-0.0601823695534416	3.31065939911938	-0.391803713736208	0.708467796769949	0.999880997596556	-5.031665410879
Q5H8A4-1	PIGG	-0.0277969754910101	3.29928556354676	-0.277197327859326	0.790743538284694	0.999880997596556	-5.03177169814243
Q9UKZ9	PCOLCE2	-0.047196907787813	3.32765343160819	-0.449319033911611	0.668658221589714	0.999880997596556	-5.03180307175346
Q9UM19	HPCAL4	0.141835800189555	3.30107623173738	0.689725873290418	0.51562513557603	0.999880997596556	-5.03193903877185
Q96L58	B3GALT6	0.0754834769089141	3.31082336888379	1.02797133173728	0.342821383084958	0.999880997596556	-5.03208914372979
P53990-2	IST1	0.0668369847426391	3.31725202141911	1.73325173640495	0.132722300874728	0.999880997596556	-5.03231399968523
P50443	SLC26A2	-0.0442101271402605	3.34502850251674	-0.48832753737896	0.642301552229199	0.999880997596556	-5.03240922361922
Q86TW2-1	ADCK1	-0.0597754887249238	3.3233704087551	-0.69201816125768	0.514280913395561	0.999880997596556	-5.03251356864507
Q8NBK3	SUMF1	-0.0228622636009572	3.31322499677449	-0.253107464169355	0.808463525819185	0.999880997596556	-5.032785014586
Q6R2W3	SCAND3; ZBED9	0.0497037156835921	3.33162802632163	0.51597339580613	0.623957214283092	0.999880997596556	-5.03296694587053
Q5T7M9-1	FAM69A	-0.0367628842145273	3.32228756427344	-0.394060544137297	0.706885525494953	0.999880997596556	-5.03327012242169
Q9Y573-1	IPP	0.0802633222241712	3.33204267703062	1.05737275881724	0.330235489086803	0.999880997596556	-5.03349242809252
Q9NXG6-3	P4HTM	-0.00296542775151092	3.32233981305959	-0.0298892533475092	0.977105197573345	0.999880997596556	-5.03379018348102
Q765P7	MTSS1L	-0.0605617205893994	3.35530718965845	-0.943937017484867	0.380917474040132	0.999880997596556	-5.03422418590267
Q8TCT7	SPPL2B	-0.0751875277777051	3.3090192686263	-0.650807692164075	0.538795319498896	0.999880997596556	-5.03437246100623
Q96LW7-1	C9orf89; CARD19	0.126581105303612	3.33846350908808	0.736990481672361	0.48837658752382	0.999880997596556	-5.03442375386813
Q92186	ST8SIA2	0.0678887851961437	3.31662299219555	0.934039957831743	0.385613531261601	0.999880997596556	-5.03457138718732
Q9UKY7-3	CDV3	0.259797692528536	3.2945918033716	0.99022175397706	0.359543030259237	0.999880997596556	-5.0346065387019
Q643R3	LPCAT4	-0.0471789213795197	3.33526298400287	-0.481330717216108	0.646988983837377	0.999880997596556	-5.03463770649811
Q9BRV8	SIKE1	-0.0850076047422574	3.31122448209025	-1.57192856081571	0.166003343013271	0.999880997596556	-5.03514869390334
Q9UKI2	CDC42EP3	0.0616141121653294	3.3125945819403	0.893203905636484	0.405460101188497	0.999880997596556	-5.03519248100815
Q13286-1	CLN3	0.0183744964492912	3.28454480204724	0.120413563626171	0.908007186113819	0.999880997596556	-5.0352934449693
O43257	ZNHIT1	0.019167598863628	3.17031873784037	0.0357342720402795	0.972630019551208	0.999880997596556	-5.03567086907528
Q96E39	RBMXL1	-0.0937793001372823	3.31822468313047	-0.911135471976691	0.396651902090193	0.999880997596556	-5.03586529239348
Q9C000	NLRP1	-0.0522792497913783	3.33801617594685	-0.552130899405091	0.600403155548058	0.999880997596556	-5.03654124978229
O43861-1	ATP9B	-0.00719660059946814	3.32343921636532	-0.0568264124820568	0.956491360209094	0.999880997596556	-5.036884335426
P78346-2	RPP30	0.0585269506867239	3.31821300265007	1.69943373271212	0.139118421581032	0.999880997596556	-5.03745887944625
Q8N335	GPD1L	0.0840308550668692	3.31726742862887	1.3612903020187	0.221353744236764	0.999880997596556	-5.03838705507813
Q7Z624	CAMKMT	0.0468848348858066	3.32199868035447	1.23668356828304	0.261497539201773	0.999880997596556	-5.0383911411001
Q9UN86	G3BP2	-0.203332382818941	3.35575010870636	-0.866841164878908	0.41867564837477	0.999880997596556	-5.03839297523761
Q9H5J0	ZBTB3	-0.0537035726427503	3.31369728721302	-0.936649690550603	0.384370930164882	0.999880997596556	-5.03900028044795
O43491-1	EPB41L2	-0.0588282220463532	3.31639088338983	-0.699231595386497	0.510065887843631	0.999880997596556	-5.03918388179335
Q53GI3	ZNF394	-0.0674159311831275	3.28510706909705	-0.564627132807105	0.5923815824352	0.999880997596556	-5.03934175173939
Q6ZVL6	KIAA1549L	-0.0783946116289635	3.29402140218182	-0.770140097830931	0.469858356818472	0.999880997596556	-5.03983928860691
Q9P2N6-3	KANSL3	0.0619636547289065	3.31500655847119	1.55633516106708	0.169611542845311	0.999880997596556	-5.04032587281541
Q6PI47	KCTD18	0.0617855383546632	3.31849504795952	0.704396118699296	0.507062127886603	0.999880997596556	-5.04032960244459
Q9BPZ3	PAIP2	-0.106589322789032	3.32573482959939	-1.12919278404058	0.301075898755698	0.999880997596556	-5.040731415477
Q9NRY2-1	INIP	0.123830406913623	3.2760444295701	0.87542652039662	0.414337074697947	0.999880997596556	-5.04123320039521
O75717	WDHD1	0.0550684439528692	3.31698072622237	2.20336526752725	0.068848562778687	0.999880997596556	-5.04131602003828
O95361-1	TRIM16	0.114450275194152	3.34241673642488	1.17275964060941	0.284459346143775	0.999880997596556	-5.04161119339525
Q58EX2-4	SDK2	0.0465394404822937	3.34517422985224	0.607846883784632	0.565123204772099	0.999880997596556	-5.04253890858068
Q7Z5W3	BCDIN3D	0.0529132120655334	3.33190291625575	0.83115415016273	0.43706979210902	0.999880997596556	-5.04269887871552
Q92733	PRCC	-0.0525763503724431	3.33054801033872	-1.94566042774769	0.0986537956032198	0.999880997596556	-5.04324875090054
Q96DC7-2	TMCO6	0.0572750273400914	3.32654901858277	0.885651435692873	0.40921377018309	0.999880997596556	-5.0433015599212
Q15034	HERC3	0.0551314094825686	3.35213293229929	0.532227022655503	0.613306624274038	0.999880997596556	-5.04338686141755
O95620	DUS4L	0.106569857004202	3.33223945318622	0.851513271331244	0.426505037405879	0.999880997596556	-5.04357063732989
Q6QNY0	BLOC1S3	-0.0674800705403227	3.3479559814756	-0.960360439910312	0.373222526594517	0.999880997596556	-5.04380338817646
Q5T6S3-2	PHF19	-0.00115929112500147	3.36838656348308	-0.0123938728854355	0.990505083551094	0.999880997596556	-5.04392141561814
Q9Y6K0	CEPT1	-0.118899995839287	3.29817826368529	-0.940800908427011	0.382400724209872	0.999880997596556	-5.0448711367285
Q8NCA9	ZNF784	-0.0425866805703497	3.34380588216685	-0.498862367496715	0.635277688900036	0.999880997596556	-5.045213670408
Q9NQL2-1	RRAGD	0.1004961278155	3.29438497779043	0.788820124469338	0.459640838009642	0.999880997596556	-5.0454888781753
Q96NE9-1	FRMD6	0.061581815169407	3.31511766981189	1.05181749692139	0.332584362090031	0.999880997596556	-5.04550648404882
Q76G19	PDZD4	-0.0726153604382356	3.32794047647361	-1.00040360712083	0.35497022960365	0.999880997596556	-5.04562402331845
Q13445	TMED1	0.1549378991377	3.29083076866772	1.43040994419389	0.201553532643156	0.999880997596556	-5.04565224893874
Q9HBR0	SLC38A10	0.0583549586522054	3.31987765329906	0.640370768448719	0.54511973478607	0.999880997596556	-5.04605546614859
Q15699	ALX1	-0.0667313811234124	3.32065884403385	-0.724164612655047	0.495673152896071	0.999880997596556	-5.04615304464707
Q8NBJ7-1	SUMF2	0.0425100880936986	3.3267604140859	1.63868832055926	0.15136167744335	0.999880997596556	-5.04638277034897
O75865-2	TRAPPC6A	0.0819268414386219	3.35937382345379	0.817632098336641	0.444190870839502	0.999880997596556	-5.04652028807851
Q15631-1	TSN	-0.0372846231439343	3.32256550825377	-1.77277041987735	0.1256095987664	0.999880997596556	-5.04673626032408
Q9BXH1	BBC3	0.0460867388021806	3.32974582193134	0.644012041673932	0.542907979310103	0.999880997596556	-5.04738643354862
Q12789-2	GTF3C1	0.0338980374045704	3.32186372197755	2.33040067449411	0.0577259071044778	0.999880997596556	-5.04775842765011
Q9BVG8-6	KIFC3	0.0532746281459572	3.34151225147914	0.544333736564947	0.605439544309129	0.999880997596556	-5.04861913116119
Q96KC2	ARL5B	0.0852638969167589	3.31251698253735	1.06816329377065	0.325711687703907	0.999880997596556	-5.0488225691579
P60033	CD81	-0.128551293476783	3.32055499177754	-1.15505651345868	0.291115341758695	0.999880997596556	-5.04950010463918
P61916	NPC2	0.0557273216951644	3.31426523050628	0.994648521119372	0.357549210564466	0.999880997596556	-5.04951731178024
Q8TER5	ARHGEF40	-0.0275324932595514	3.32243907945884	-0.271312132374057	0.795060463638969	0.999880997596556	-5.04959445517217
Q96FK6	WDR89	-0.0355764091981302	3.31699042209784	-1.65560349292352	0.147852222892919	0.999880997596556	-5.04977444479656
A7MBM2	DISP2	-0.0247868738422087	3.3197827831141	-0.265772548328632	0.79913112292112	0.999880997596556	-5.0497973764951
Q92529	SHC3	0.114540377078813	3.31775141679742	1.21539528632826	0.268960157662656	0.999880997596556	-5.0502230691867
Q00597	FANCC	0.0201674131317803	3.32611917980057	0.201034121337163	0.847179579738091	0.999880997596556	-5.05055590842504
Q8IWP9	CCDC28A	-0.0307329321739399	3.29370139632112	-0.326392250897472	0.754988470801913	0.999880997596556	-5.05057880721747
Q9HAB8-1	PPCS	0.0661367217009928	3.31770653581247	1.46124820290132	0.193253029364925	0.999880997596556	-5.05118173874683
Q16877	PFKFB4	0.053150506395044	3.34001472667204	1.09961865595776	0.312813697364063	0.999880997596556	-5.05121921228695
P17152	TMEM11	-0.119870986301595	3.3392956599401	-1.17988279784531	0.281817939535886	0.999880997596556	-5.05145576587752
Q86SQ0-1	PHLDB2	0.0321720879961389	3.31117695209638	0.276888529768378	0.790969849142335	0.999880997596556	-5.05170527105618
Q9NR82-6	KCNQ5	-0.0793354258020472	3.2979684862033	-0.702462460884906	0.508185397759676	0.999880997596556	-5.05205232653242
Q9HBT8-2	ZNF286A	-0.0660366446017399	3.33335050025382	-0.809636679256625	0.448440555565952	0.999880997596556	-5.05222015512822
Q9BQ89	FAM110A	-0.00768232327304541	3.30516750298729	-0.0846054447295277	0.935271845654127	0.999880997596556	-5.05256609722236
Q6ZT98	TTLL7	0.0910410912485417	3.34031021956009	0.790953761998133	0.458483817137996	0.999880997596556	-5.05265304985981
Q9H074	PAIP1	0.0462758176121776	3.31238656445369	1.64867320368973	0.149280548892543	0.999880997596556	-5.053181206881
Q96FC9-2	DDX11	0.0224453843895536	3.3141662768684	0.20422810463015	0.844790156640903	0.999880997596556	-5.05333956284888
P51805	PLXNA3	-0.0217582453195242	3.32229074885449	-0.212075324433565	0.838927339598232	0.999880997596556	-5.05346592018422
Q71F23	MLF1IP; CENPU	-0.0719199687411973	3.32370417562268	-1.49088484171089	0.185574250084847	0.999880997596556	-5.05364791288053
Q6P996-1	PDXDC1; LOC102724985	0.0362478635817315	3.32442991811737	1.74685454066805	0.130230840891945	0.999880997596556	-5.05366059936657
O60701	UGDH	-0.0469848334456371	3.3158830822344	-1.89241739846596	0.106278767081434	0.999880997596556	-5.05369007332213
Q16540	MRPL23	-0.0647083407046421	3.32579726053881	-0.69666822083349	0.511561132252384	0.999880997596556	-5.05393903304228
P21283	ATP6V1C1	0.0936116840287275	3.32252208952197	2.00108970508322	0.0912965990124698	0.999880997596556	-5.05443255220761
Q9UPQ7-1	PDZRN3	-0.0343591337477831	3.3192406606095	-1.90675688433672	0.104169224151339	0.999880997596556	-5.05485725180822
Q96GC9	VMP1	-0.160122914375526	3.33002458365016	-1.088564319144	0.317297549751263	0.999880997596556	-5.05503887330084
Q9NRX2	MRPL17	0.0786223774389304	3.31908029074371	1.38043466611679	0.215700072627894	0.999880997596556	-5.05515949117349
Q13424	SNTA1	0.0775442054216127	3.32170370198267	0.866291464641351	0.418954581108759	0.999880997596556	-5.05519520283822
P35754	GLRX	0.0555742540136753	3.30571354858616	1.28014838168127	0.246819087782961	0.999880997596556	-5.05556669241227
P32519-1	ELF1	-0.0686389826078946	3.31860162405209	-1.22985044573089	0.263873084512467	0.999880997596556	-5.05591910898559
O75356	ENTPD5	0.00847125543284601	3.33056950607105	0.0800494295230065	0.938748573877918	0.999880997596556	-5.05626922530635
Q13889	GTF2H3	0.0511710101939793	3.319877426957	1.02727314873158	0.34312489632285	0.999880997596556	-5.05637405270109
O95948	ONECUT2	-0.0507667488998145	3.31878864140545	-0.609447136039457	0.564128637437875	0.999880997596556	-5.05652116734742
Q9UN67	PCDHB10	-0.028318493620484	3.33165393040011	-0.269616015174063	0.79630608315088	0.999880997596556	-5.0569584735964
Q9Y6N1	COX11	-0.13227373144806	3.30357372713414	-0.897725902284397	0.403225044944042	0.999880997596556	-5.05721134110411
Q15311	RALBP1	0.0567583476010033	3.3121059715219	1.70937062954967	0.137208685412814	0.999880997596556	-5.05787089976349
Q86XS8	RNF130	0.0581322666484985	3.32908485928299	0.594465035352089	0.57348154865498	0.999880997596556	-5.05799168739548
Q02363	ID2	-0.0627013879312262	3.32268062890013	-0.264501015116384	0.800066463209473	0.999880997596556	-5.05830323811683
Q13352-5	ITGB3BP	-0.050762582464736	3.33467530039384	-0.967156835086772	0.37007381142895	0.999880997596556	-5.05873089705554
Q9UGI0	ZRANB1	0.057866190140438	3.33051487486993	0.733428494989767	0.490395642106826	0.999880997596556	-5.05896117172647
Q8TA86	RP9	-0.0761760197610065	3.31116401724285	-1.55984715809704	0.168792499996162	0.999880997596556	-5.05897142853861
Q9Y3B4	SF3B14; SF3B6	0.159226260012637	3.32952586369555	1.70789901681949	0.137489901455593	0.999880997596556	-5.05914118822153
Q9H0V1	TMEM168	-0.083340884255177	3.29327193259226	-0.81687587793049	0.444591570448725	0.999880997596556	-5.05916264542522
Q12824-1	SMARCB1	-0.0438240006829547	3.329698482973	-1.66419813272307	0.146099076086643	0.999880997596556	-5.05918601151551
Q9NS69	TOMM22	0.0697100236245634	3.32546585536181	0.999282860221913	0.355471299514608	0.999880997596556	-5.05955062138268
P62699	YPEL5	0.068160261668541	3.31691522003348	1.04927394254796	0.333664351082757	0.999880997596556	-5.06004175504555
P09564	CD7	0.0537273344309576	3.29977870464277	0.474115808016422	0.651841083885791	0.999880997596556	-5.06007536282653
O75541	ZNF821	-0.00155356262555186	3.33629418234487	-0.0164339426927785	0.987410279961187	0.999880997596556	-5.06054196628966
Q6V1X1	DPP8	0.0725281880305932	3.30680890564525	1.36332224754958	0.220747396037904	0.999880997596556	-5.06074260536326
Q9NX08	COMMD8	0.0504320741246923	3.32084519014343	1.52396403934866	0.177338769588697	0.999880997596556	-5.06079572487256
Q5VUG0	SFMBT2	-0.0130667198567137	3.3226138630957	-0.121556212436933	0.907139191540487	0.999880997596556	-5.06081575280019
Q14CZ0	C16orf72	0.0370073986332731	3.30763852590494	0.4580489786531	0.662712945559467	0.999880997596556	-5.06112218704693
Q13829	TNFAIP1	-0.0315672058522444	3.31084945336218	-0.380073561856743	0.71671726834095	0.999880997596556	-5.06128817888344
P98182-1	ZNF200	0.101920262568553	3.28909988878934	0.350206169637482	0.737908887766701	0.999880997596556	-5.06134959942049
P78537	BLOC1S1	0.0559148951061811	3.31631280225732	1.08496005516909	0.318770932175939	0.999880997596556	-5.06165700791907
Q96PX8	SLITRK1	0.016711177047392	3.31649464948513	0.17007811535483	0.870425699412726	0.999880997596556	-5.06172783853342
Q8IUD2-1	ERC1	0.156866320573492	3.32562046497464	1.19366027417765	0.276768374822601	0.999880997596556	-5.06227778856052
P31751	AKT2	0.042910541902666	3.31967487984177	1.75859778341582	0.128116634717836	0.999880997596556	-5.06231480056726
Q16394	EXT1	-0.057357874194362	3.3197991491514	-0.284859402752419	0.785135365851027	0.999880997596556	-5.06252985863297
Q96MX3	ZNF48	-0.129626956415391	3.33443596303819	-1.21754454645239	0.268198461690857	0.999880997596556	-5.06261340442707
Q6N069	NAA16	0.0518868486739349	3.32431439331399	1.7681456080013	0.126422383065914	0.999880997596556	-5.0628730090889
Q8WV92	MITD1	0.0796991998946189	3.31914899535341	0.827823878305169	0.438815888047817	0.999880997596556	-5.0629290110902
Q71RG4-1	TMUB2	0.112928279667158	3.29252837014268	0.869260674532182	0.41744956056135	0.999880997596556	-5.06300360615277
P56537-1	EIF6	0.0520600563944714	3.3271498766239	1.77157029487943	0.125820022047208	0.999880997596556	-5.06311647833217
O43665-3	RGS10	-0.0667199660738103	3.31975805416364	-1.32640517605312	0.231999732349079	0.999880997596556	-5.06332559199467
Q9BTT4	MED10	0.0863669652212993	3.30151757421838	1.3315190221163	0.230410988639924	0.999880997596556	-5.06344014292752
Q49AM1	MTERFD3; MTERF2	0.0712096028952371	3.32821150095529	0.938279019911384	0.383596704685484	0.999880997596556	-5.06397872455229
Q9NVN3-1	RIC8B	0.0665187456932027	3.341879562741	1.05080356773809	0.333014533814161	0.999880997596556	-5.06416512776367
Q6ZT21-1	TMPPE	-0.0273387485821266	3.33238109753839	-0.211824460623178	0.83911459294658	0.999880997596556	-5.06444764663941
P52799	EFNB2	0.0917833569764177	3.29406221392846	0.732876299069018	0.490709151303334	0.999880997596556	-5.06471387773235
O94880	PHF14	0.0781827931213386	3.30564018032324	1.40847699236398	0.207654600356942	0.999880997596556	-5.06473758392651
Q9ULQ0-1	STRIP2	0.0227915007447498	3.34964178420341	0.259143572376105	0.804011355846	0.999880997596556	-5.06499500373565
Q8N9Z2-1	CCDC71L	-0.011147604816038	3.34241407215489	-0.110145444597056	0.915813260670314	0.999880997596556	-5.06543573920394
Q9H9S5	FKRP	0.0697285230987049	3.31160192561676	0.559017523733791	0.595974833715945	0.999880997596556	-5.06546600287059
P59817	ZNF280A	-0.0544884892564686	3.31067866113383	-0.735748566575516	0.489079905228402	0.999880997596556	-5.06572329897805
Q8TDP1	RNASEH2C	0.0504077327040556	3.31992505783713	1.18845269191704	0.278667822291983	0.999880997596556	-5.06585403082099
P09488	GSTM1	0.117086522050371	3.34135229354575	1.45242966551949	0.195593946010185	0.999880997596556	-5.06674757958455
Q96K62	ZBTB45	-0.0315528689575314	3.34976851569563	-0.24000590337822	0.818153837395973	0.999880997596556	-5.06705715429441
Q8TEZ7	PAQR8	0.0230534217201476	3.34769126267656	0.132890892777142	0.89853676913385	0.999880997596556	-5.0677880422052
Q9HC52	CBX8	-0.0523768724367444	3.31539569812389	-1.78486033209599	0.123508921904873	0.999880997596556	-5.06792760644148
Q9P0J1-2	PDP1	0.0629328598641196	3.31037178111192	1.52981087930177	0.175919098246036	0.999880997596556	-5.06804651680761
Q9NRB3	CHST12	0.0779387387783063	3.31672538094812	1.30747140755493	0.237967324614217	0.999880997596556	-5.06828582690031
Q9BXT5	TEX15	-0.0471594584254332	3.35010083559899	-0.47753498826655	0.64953931254251	0.999880997596556	-5.06850663634254
Q15928	ZNF141	-0.0432106580341805	3.32235204015823	-0.399653683710104	0.702971048884013	0.999880997596556	-5.06863820718466
Q9BVG9	PTDSS2	-0.0760739723830796	3.31261012390596	-0.393077459002209	0.707574574023288	0.999880997596556	-5.0688042354186
Q8TCG5-1	CPT1C	0.00379366261363219	3.33359182348827	0.0276818140098109	0.978795546793634	0.999880997596556	-5.06969790560333
Q92985-4	IRF7	0.00888836129999122	3.34389634038744	0.0773630357671421	0.940799276399297	0.999880997596556	-5.06998071175401
Q9HD64-2	XAGE1D; XAGE1E; XAGE1B; XAGE1C; XAGE1A	-0.0385448534962223	3.31214945286874	-0.344689054888012	0.741851761717738	0.999880997596556	-5.07004324415819
Q9H2X6-1	HIPK2	0.00939543391732601	3.32730079287529	0.101322201967473	0.922529132654637	0.999880997596556	-5.07005210069791
Q63HN8-3	RNF213	0.0471806329513861	3.32555401012454	1.75790852752408	0.128239796111762	0.999880997596556	-5.07014402800201
Q96P71-1	NECAB3	0.0292893835501557	3.3594812652075	0.251889471374177	0.809362860209426	0.999880997596556	-5.07120507428693
Q8WWX9	SELM; SELENOM	-0.0505641536934254	3.33418012541641	-0.572897459766582	0.587106932157092	0.999880997596556	-5.07128261775206
Q14774	HLX	0.0292141358500305	3.30663249355381	0.313595621138078	0.764229911419076	0.999880997596556	-5.0713086115037
Q86V42-2	FAM124A	0.055841333223635	3.34162053101858	0.721841630016954	0.497002501031555	0.999880997596556	-5.07385833427561
Q8IVF5-2	TIAM2	-0.00336161649642321	3.32081233808992	-0.0335656810353584	0.974290261434589	0.999880997596556	-5.07452402474857
A0PJW6	TMEM223	-0.0825802137364387	3.28866066071444	-0.414513982599541	0.692619166465406	0.999880997596556	-5.07508787486626
Q969Y0	NXPE3	0.0199544200768399	3.33669730778147	0.211460423960342	0.83938634282405	0.999880997596556	-5.07547429131242
Q9UBX1	CTSF	0.0431898505915343	3.31397086452634	1.39128126272544	0.212555161210333	0.999880997596556	-5.07548467209632
Q86WG5	SBF2	0.0967236741020838	3.32274383594656	1.37559759703132	0.217116091719727	0.999880997596556	-5.07563516764306
Q02487	DSC2	0.0541686275069705	3.32316010879979	0.647673375569261	0.540689728856362	0.999880997596556	-5.07563841045611
Q13439-5	GOLGA4	0.022907598599962	3.32833862136277	0.250930524666522	0.810071145275225	0.999880997596556	-5.07566592004952
A0PK00	TMEM120B	-0.150074390315767	3.31305931167111	-0.904232715244017	0.400025298879453	0.999880997596556	-5.07669555588167
Q16600	ZNF239	-0.0596239890054414	3.31249020974646	-1.52983845885918	0.175912426934062	0.999880997596556	-5.07702968259884
Q8NAN2-1	FAM73A; MIGA1	0.0687770830712109	3.35196886329007	0.539989064367829	0.608256206834258	0.999880997596556	-5.07710627387912
O43516-3	WIPF1	0.0532068068332621	3.32363353007939	1.03887668682593	0.33810862951728	0.999880997596556	-5.07721943977837
Q9P2S5	WRAP73	0.0492644729915269	3.33572443473174	1.21550590540196	0.268920908802045	0.999880997596556	-5.07753698962754
Q9BTZ2	DHRS4	-0.0543826651889566	3.32233548803995	-1.38092102152429	0.215558158745521	0.999880997596556	-5.07758493047695
O77932	DOM3Z; DXO	0.0600314666337174	3.34427332015278	1.01901320996975	0.346732060566621	0.999880997596556	-5.07888306624099
Q99719-1	SEPT5	-0.0677307413527406	3.31875965572166	-1.38341489909534	0.214831796203204	0.999880997596556	-5.07896666456967
Q6V9R5-1	ZNF562	-0.047002192197932	3.32254389906383	-0.529724956791092	0.614939572877474	0.999880997596556	-5.07921414442509
Q8NCR0-1	B3GALNT2	-0.0423281547833707	3.31093918533694	-0.503466064627759	0.632221160831248	0.999880997596556	-5.07943164398655
O14618	CCS	0.0561701386480053	3.32370868760135	1.21194161728138	0.270188046913047	0.999880997596556	-5.0794507313177
O75326-1	SEMA7A	-0.0814143116615958	3.322235805119	-0.980923144617413	0.363759745053314	0.999880997596556	-5.0794739330876
Q9BU76-1	C1orf35	-0.101807239670328	3.30933788958688	-1.4040368551137	0.208910037349609	0.999880997596556	-5.07956694962345
P0CG08	GPR89A; GPR89B	-0.171498336613235	3.30965349977013	-1.15533361621335	0.291010149017662	0.999880997596556	-5.08011351311949
Q86Y01	DTX1	-0.0169262664391992	3.35252909121177	-0.185939456919635	0.858495468737667	0.999880997596556	-5.08020508793625
Q15628	TRADD	0.072615119607853	3.31946619660849	1.11929912253656	0.304961022795008	0.999880997596556	-5.08036456844269
O75197	LRP5	0.033469275660852	3.31958193398034	0.376376067172349	0.719326341716535	0.999880997596556	-5.08087904475044
Q15386-1	UBE3C	0.0369864830766633	3.3202217635271	1.75187153513248	0.129323475000082	0.999880997596556	-5.08090468160764
P80370-1	DLK1	0.101348924101846	3.29301949004078	1.39405502961668	0.211757629093635	0.999880997596556	-5.08099236892339
Q15785	TOMM34	-0.0619311112637853	3.31312347392893	-1.67587423770179	0.143749330261659	0.999880997596556	-5.08163939842561
Q9BRU2	TCEAL7	0.0534827665799896	3.32274733416081	0.513663216772488	0.625479181036763	0.999880997596556	-5.08225083394983
Q9NSI6-2	BRWD1	0.0899078149346841	3.34163820620286	1.45307856100433	0.195420807438898	0.999880997596556	-5.08263487612775
P19256	CD58	-0.031369288757919	3.30810320791749	-0.219845619257429	0.833133084165225	0.999880997596556	-5.08321762205415
Q5BKX6-1	SLC45A4	-0.0251191411370507	3.30662139948039	-0.157045689586812	0.880256214838737	0.999880997596556	-5.0833251719854
Q9NQ86	TRIM36	-0.0242031148016967	3.35532414638724	-0.231144962433271	0.824727706077204	0.999880997596556	-5.08354976219256
Q8TF50	ZNF526	0.0674693620224359	3.31210020717768	0.90111751303033	0.401554805459351	0.999880997596556	-5.08357539158888
O75486-1	SUPT3H	-0.00839049366449519	3.31412564622555	-0.0791740408316882	0.939416760673871	0.999880997596556	-5.08395475751549
Q9H267	VPS33B	0.0494151732394492	3.30952292841454	1.7439356238425	0.130761600406031	0.999880997596556	-5.08411173344151
Q8TAC9-2	SCAMP5	0.0237485805238881	3.32012010029294	0.208803281921107	0.841370603097375	0.999880997596556	-5.08425198347547
Q96BI3-1	APH1A	-0.106094007495041	3.33861964235184	-0.87644257861249	0.413825836373168	0.999880997596556	-5.08429404966951
Q9BSE5	AGMAT	0.0705085508908353	3.3387288608573	0.421808568284934	0.687563848980435	0.999880997596556	-5.08493894670572
Q9UJV8	PURG	0.0631869799744582	3.33126834037427	0.693337864091854	0.513508067964719	0.999880997596556	-5.08519778955964
Q8NEZ2	VPS37A	-0.106977030530575	3.32645252949779	-1.21427570160416	0.269357677018456	0.999880997596556	-5.08566017157976
Q96IC2	LOC81691; REXO5	-0.054153309492669	3.33392328513033	-0.533899591510077	0.612216385547292	0.999880997596556	-5.08577693565866
Q8TC05	MDM1	-0.0499621872939868	3.34208803719747	-0.670938048509631	0.526728800619048	0.999880997596556	-5.08602366476291
P17040-1	ZSCAN20	-0.0368774045333506	3.33284583075043	-0.451117776939622	0.667431075090151	0.999880997596556	-5.08647749617567
Q96HA4-1	C1orf159	0.0431726856839257	3.30251870195627	0.405865024348349	0.698635525773459	0.999880997596556	-5.08650201346902
Q96AK3	APOBEC3D	0.0325437416980987	3.32887472731847	0.343528123080795	0.742682530501926	0.999880997596556	-5.08695551641944
P48029-1	SLC6A8	0.0246986764545256	3.29565979015496	0.147173006923671	0.887718934168225	0.999880997596556	-5.08699330389519
Q9BYV9	BACH2	-0.0266109121361138	3.30303379534148	-0.284308829572406	0.785537887868543	0.999880997596556	-5.08741105225524
P50750-2	CDK9	-0.109537403583723	3.3299823428939	-1.15425034528337	0.291421559325192	0.999880997596556	-5.0874554237507
O14874	BCKDK	-0.0561551354543581	3.31627900731564	-1.21778643173587	0.268112854529642	0.999880997596556	-5.08753992630574
Q8WYL5-1	SSH1	0.0267550247203046	3.32367234926721	0.314733563831038	0.763406368971035	0.999880997596556	-5.08758551734182
Q9HCJ1	ANKH	0.0405888450570411	3.31578552693806	0.458483734031195	0.662417562423877	0.999880997596556	-5.08762460676732
Q12841	FSTL1	-0.0563165231299458	3.3131379058855	-0.484569799708088	0.644816787198636	0.999880997596556	-5.0880376002332
P61586	RHOA	0.122192552340076	3.30893424730267	1.3559356252468	0.222958811248291	0.999880997596556	-5.08914780368881
P61812-2	TGFB2	0.0351289509081701	3.29326457770632	0.418372169062173	0.689943180655912	0.999880997596556	-5.08962799848838
O15254	ACOX3	0.0437380739991801	3.31568827349952	0.487189485903451	0.643062761174137	0.999880997596556	-5.0902338798943
Q15427	SF3B4	0.112381768355222	3.33181972601124	1.27360454077534	0.248981720078341	0.999880997596556	-5.09072625411389
Q8N5Y8-1	PARP16	-0.079850001927644	3.3265027231905	-0.700823033247113	0.509139035716793	0.999880997596556	-5.09076708716695
Q9NQX6	ZNF331	-0.0868342216636869	3.33967704795623	-1.10977187372026	0.308741739005607	0.999880997596556	-5.09100509429481
Q9BQ65	USB1	0.0697676322089638	3.25712589489795	0.567142558314918	0.590774394611284	0.999880997596556	-5.09162506350348
Q9ULH4	LRFN2	0.0375473074818811	3.29477917192809	0.263478766553309	0.800818692089476	0.999880997596556	-5.09190233575098
Q92747	ARPC1A	0.0408562552964712	3.32016078856924	1.90472924130115	0.10446497125527	0.999880997596556	-5.09195519920619
Q5SZL2	CEP85L	0.0382283331635072	3.34209927511696	0.429473174576406	0.682271012899974	0.999880997596556	-5.09223753188586
Q9ULQ1-3	TPCN1	-0.0290256712529112	3.29721601977678	-0.297202009833379	0.776130983082723	0.999880997596556	-5.09237618411064
Q8WU20	FRS2	0.0294283289258178	3.32093046302449	0.270458069412613	0.795687600867425	0.999880997596556	-5.09267022076523
Q2T9J0	TYSND1	0.0520478312023499	3.33236982828247	0.97214898860742	0.367774249831323	0.999880997596556	-5.09278044634961
P35442	THBS2	0.0519474849300579	3.30270358402255	0.556906987197377	0.59732998199278	0.999880997596556	-5.09281558645938
Q8N0V3-1	RBFA	-0.0543168259137806	3.30773726879124	-1.12978121003295	0.300846142485017	0.999880997596556	-5.09331446649906
Q9H668	OBFC1; STN1	-0.0562225368437364	3.31596364403388	-1.13678398791044	0.298123115854082	0.999880997596556	-5.09367658883773
P18075	BMP7	-0.0518239260182259	3.32743850610543	-0.800266207895942	0.45345801529406	0.999880997596556	-5.09378568669258
Q8TCD5	NT5C	0.071734441677033	3.3415885623851	1.29471633245366	0.242063981176241	0.999880997596556	-5.09399500972593
Q96JN2-4	CCDC136	0.00392006955755259	3.32449878555546	0.0414672616816049	0.968241670163568	0.999880997596556	-5.09424710788989
Q8IYR6-1	TMEFF1; MSANTD3-TMEFF1	-0.0510767400413933	3.29844694654262	-0.273603704521928	0.793378591950272	0.999880997596556	-5.09441521538464
Q6P4H8-1	FAM173B	0.034502757729923	3.30871365973834	0.245883524042489	0.813802115610255	0.999880997596556	-5.09442098679997
P35080-2	PFN2	0.0697992857437326	3.31961948233679	1.41673017996006	0.205339292823187	0.999880997596556	-5.09465634066601
Q8ND25-1	ZNRF1	0.0448000338937198	3.31486329304562	0.538369342716069	0.609308158582871	0.999880997596556	-5.09469532433661
Q9H1I8-1	ASCC2	0.0446112996135931	3.31595930791958	1.6582806360866	0.147303982173563	0.999880997596556	-5.09488234019778
Q9H063	MAF1	0.0687661911787209	3.34685625069596	1.18153241897377	0.2812092196539	0.999880997596556	-5.0951700416968
Q9BRS8	LARP6	-0.0559054810440798	3.33469851026406	-1.25816837406076	0.254149183784773	0.999880997596556	-5.0960448723504
Q8TD22	SFXN5	-0.0281338403301227	3.31607494490203	-0.28590209216354	0.784373258148737	0.999880997596556	-5.09619564848899
P37287-1	PIGA	0.0183490887105553	3.33156789822295	0.163269279499972	0.875558660437524	0.999880997596556	-5.09688637878509
Q8WUJ0	STYX	-0.0597655410966933	3.31451371435504	-0.676143398017347	0.523637061631014	0.999880997596556	-5.09707956023845
Q2NKQ1-1	SGSM1	0.00657753075041259	3.32753010483771	0.0647064745110928	0.950467249121938	0.999880997596556	-5.09789892572201
P07093-3	SERPINE2	-0.0434318244156365	3.30518253559954	-0.489432600974893	0.641562861000519	0.999880997596556	-5.09816022641517
O00124-1	UBXN8	-0.0358529342673486	3.34592614984473	-0.374333616590983	0.720769335156056	0.999880997596556	-5.09848464114855
Q9UHC7	MKRN1	0.0539726058201675	3.32513216362547	1.59457008193359	0.160893134049972	0.999880997596556	-5.09955667030719
Q9UBV7	B4GALT7	0.0240841760010365	3.32578326846202	0.236164764689144	0.821001606876199	0.999880997596556	-5.1002579485991
Q9UNA1-1	ARHGAP26	0.06980820703751	3.33756526169185	1.2446231453006	0.258760705490504	0.999880997596556	-5.10031915058512
Q9HAH7-1	FBRS	-0.0491807534922814	3.33702559576709	-0.841678083554305	0.431585153058458	0.999880997596556	-5.10039749363128
A6NHQ4	C17orf96; EPOP	-0.000574248121045082	3.3037711181115	-0.00671419604917268	0.994856162203035	0.999880997596556	-5.10041644273544
Q6ZUT6-1	C15orf52; CCDC9B	0.00918905439562455	3.32188335414754	0.10822483116172	0.91727452464736	0.999880997596556	-5.10047146520497
Q8IYA6	CKAP2L	-0.068182269727335	3.3188743962393	-1.02046373130487	0.346096416442947	0.999880997596556	-5.10121396649061
Q9UKB1-3	FBXW11	0.0659240403203798	3.35025039562941	1.14194405800536	0.296129903545254	0.999880997596556	-5.10127335066984
P39060-3	COL18A1	-0.0816497512915359	3.3133823183394	-0.841309315317597	0.431776487593342	0.999880997596556	-5.10146385399869
O96006	ZBED1	-0.0446406409975502	3.32749662791277	-1.17022168267861	0.28540555127154	0.999880997596556	-5.10146628087642
P19784	CSNK2A2	-0.0378021554213182	3.32369028742199	-1.83005039138075	0.115957633362162	0.999880997596556	-5.10157299041599
Q86VQ0	LCA5	0.0345408458799182	3.31102265813424	0.462536150169415	0.659667445194702	0.999880997596556	-5.10168472721154
Q4G0X4	KCTD21	0.0247405193909763	3.34665789666975	0.238630069192911	0.819173517428032	0.999880997596556	-5.10265261542231
Q8IWZ3-6	ANKHD1-EIF4EBP3; ANKHD1	0.055191597723815	3.32944096215568	0.758685664522313	0.476201391861982	0.999880997596556	-5.10309461167131
Q86X40	LRRC28	0.0380607537868469	3.35160331186307	0.366426984623611	0.726367163636265	0.999880997596556	-5.10327089750901
Q9BSH5	HDHD3	-0.052961815719601	3.30638927723964	-0.903064420437274	0.400598392509258	0.999880997596556	-5.10352372547071
Q9NPA3	MID1IP1	0.0699095913134561	3.33017047068594	1.35922651169944	0.221971130379869	0.999880997596556	-5.10417374737083
Q9NVV4	MTPAP	0.0683836127560037	3.29651865505991	1.68352368766848	0.14222968272639	0.999880997596556	-5.10423354994396
Q8IVL6-1	LEPREL2; P3H3	-0.0512476383050391	3.33347194685244	-1.0648328906749	0.327102484292426	0.999880997596556	-5.10437062897641
Q8NEZ5-1	FBXO22	0.0804857368221964	3.32105863050604	1.51578080332597	0.179343740156912	0.999880997596556	-5.10437833710317
Q16649	NFIL3	0.0406112450821774	3.32955656975352	0.425042599831687	0.685328192396369	0.999880997596556	-5.1044573673274
O15083	ERC2	0.0338466798805482	3.30844911291598	0.200104504190432	0.8478753619509	0.999880997596556	-5.10476769961013
Q8NCJ5	SPRYD3	0.0301349258310896	3.32718272448819	0.36465046345181	0.727627481050703	0.999880997596556	-5.10478270188106
P48552	NRIP1	0.0487377208566313	3.30754334953538	1.66380298900074	0.146179238574495	0.999880997596556	-5.10559338824496
P16415	ZNF823	-0.00692251339224936	3.32349305622319	-0.0586824369864557	0.955072177253432	0.999880997596556	-5.10587918322829
Q9NRA0-5	SPHK2	0.0196159627148627	3.34424030903806	0.215994090468702	0.836003739670871	0.999880997596556	-5.10604491770933
Q969H8	C19orf10; MYDGF	-0.0888475992422095	3.32001245058218	-1.60420817161221	0.158763361554776	0.999880997596556	-5.10684050072909
Q3SYG4	BBS9	0.0735246504107274	3.32640502408168	1.23917986806231	0.260634343251596	0.999880997596556	-5.10764836014135
Q9BXY0	MAK16	-0.0625502289563618	3.3219420917782	-1.53435460994543	0.174823190940541	0.999880997596556	-5.10856390258837
Q92692-1	PVRL2; NECTIN2	0.0251619408613849	3.33505112020969	0.194758757813536	0.851879328165467	0.999880997596556	-5.10903675347157
Q9H840	GEMIN7	0.0633026716158609	3.34037142797846	1.04540620672392	0.335312040051105	0.999880997596556	-5.10914999325951
Q9Y233-2	PDE10A	-0.0422359773537317	3.31095363227298	-0.546486890445201	0.604046382272752	0.999880997596556	-5.10996589083773
Q92685-1	ALG3	0.0545805681476936	3.318209408776	0.324620149642763	0.756265649639033	0.999880997596556	-5.11026753899916
Q13227	GPS2	-0.0953777967275572	3.30800743983274	-1.18101355370976	0.281400562875164	0.999880997596556	-5.11052466966251
Q9HA47-4	UCK1	0.0557212914038964	3.32360227511191	1.26784821499437	0.250897846264824	0.999880997596556	-5.11085280939701
Q8WVF1-1	OSCP1	-0.0191053537540354	3.3128775831151	-0.231042850839769	0.824803553589731	0.999880997596556	-5.11103741628773
Q9Y3D3	MRPS16	0.0753394203652176	3.29762383227665	1.41101221683456	0.206940859798612	0.999880997596556	-5.11122472130861
Q9UBB5-1	MBD2	-0.0488582767590198	3.3191993427139	-1.07742651908515	0.321868757574768	0.999880997596556	-5.11165800097137
Q96BH1	RNF25	-0.0572248846835213	3.3273717511288	-1.30440741538241	0.238945763398408	0.999880997596556	-5.11185762490392
Q99439	CNN2	0.0491838864947906	3.31282101446592	1.36199921161233	0.221142029935864	0.999880997596556	-5.11202839790527
Q9HBD1-1	RC3H2	-0.0457305540330761	3.32593243327048	-1.38493135809427	0.214391199549845	0.999880997596556	-5.11211933988933
Q14207	NPAT	-0.0434687850327205	3.3175267802167	-1.4628984897709	0.192817834728326	0.999880997596556	-5.11281240004922
A8MQ14	ZNF850	-0.0315200999672152	3.32553959166397	-0.301914415669987	0.772703006350339	0.999880997596556	-5.11303079899612
P46020-2	PHKA1	0.0534720565866211	3.31945990300503	1.7650066060284	0.126976968663869	0.999880997596556	-5.11360021016402
Q86TL0	ATG4D	0.0223064614884011	3.33143692228641	0.244405973907948	0.814895401620976	0.999880997596556	-5.11445113514911
Q86Y39-1	NDUFA11	0.0761012529100444	3.3216866421772	0.991986608113264	0.358747086222815	0.999880997596556	-5.11482872665848
Q9NYB9	ABI2	-0.0510819208494667	3.31799390270308	-1.31264408675106	0.236323579183052	0.999880997596556	-5.11488820571008
Q7Z2W4-3	ZC3HAV1	0.0501775583620114	3.33467402114808	0.941805962146983	0.381924890336592	0.999880997596556	-5.11548581804119
Q6NX49	ZNF544	-0.0539161924917805	3.35633873986812	-0.509904912584019	0.627959489536055	0.999880997596556	-5.11552621297874
Q9UFB7	ZBTB47	-0.200020128295983	3.28850243704029	-0.815633303085104	0.445250539396095	0.999880997596556	-5.11589661212986
O15118	NPC1	0.05520563289215	3.3056667030543	1.01904322518319	0.346718897894613	0.999880997596556	-5.11606622785657
Q59EK9-1	RUNDC3A	-0.0254274149725899	3.33635758837442	-0.306692765370484	0.769232763130587	0.999880997596556	-5.11621571937683
Q9H6Z4	RANBP3	-0.118577851906022	3.29615067996741	-0.994706842219335	0.357523001264552	0.999880997596556	-5.11633147408508
Q9HAV5-2	EDA2R	-0.0162746508048055	3.3035348428876	-0.166331343144767	0.873249435660323	0.999880997596556	-5.11649719129384
Q86UD0	SAPCD2	0.0453295313987653	3.32262892905013	1.58842702436991	0.162264705768692	0.999880997596556	-5.11660412397178
Q9NQC8-2	IFT46	-0.073571368848181	3.31783236753943	-0.973522708284358	0.367143435139831	0.999880997596556	-5.1175315012967
A6ND36-1	FAM83G	-0.0148828532797766	3.32525019581035	-0.181482523212916	0.861843823817948	0.999880997596556	-5.11755239122179
Q6DN90-1	IQSEC1	-0.101616567296259	3.32310434187707	-1.78652873745972	0.123221741739804	0.999880997596556	-5.11814417269402
Q99638	RAD9A	0.0266864354390709	3.34259620776009	0.227436908447706	0.827483329938523	0.999880997596556	-5.11829747951601
Q4VC05-2	BCL7A	-0.028212636043723	3.32334681518826	-0.348652434430799	0.73901841078746	0.999880997596556	-5.11832653981743
P46100	ATRX	0.00579719868126866	3.3106253056771	0.0662322902237603	0.949301200093189	0.999880997596556	-5.1183425075862
Q96MP8	KCTD7	-0.026864362680136	3.34707186702657	-0.317189856683121	0.761629873162928	0.999880997596556	-5.11847814816998
P11474-1	ESRRA	0.0690560315533287	3.30884802766655	0.742564001936864	0.485228677998786	0.999880997596556	-5.11900775017863
Q969E2-1	SCAMP4	0.0522164625324962	3.32342674767147	1.21097062022134	0.270534137006547	0.999880997596556	-5.11917097436379
Q17RN3-1	FAM98C	-0.0522694071071808	3.31777920291089	-0.78644144459569	0.460933165753121	0.999880997596556	-5.1191794798209
P49802-1	RGS7	0.0748680048134837	3.31564048806853	1.32431345883714	0.232652389267393	0.999880997596556	-5.11928664343462
Q9C0I4	THSD7B	-0.0260524731817142	3.33427839316902	-0.29815235598717	0.775439220488857	0.999880997596556	-5.11943445924774
Q9Y566-1	SHANK1	-0.0287095841340812	3.3448619214127	-0.311043376457495	0.76607822298013	0.999880997596556	-5.11979902730081
Q9NQX5	NPDC1	0.0536609913093742	3.30860004054137	0.609489341972052	0.564102420557191	0.999880997596556	-5.11993391925922
Q9GZV4	EIF5A2	0.0946515024802768	3.30790053804342	1.16242168693635	0.288330320516198	0.999880997596556	-5.11994209683465
Q96AJ1-1	CLUAP1	0.0547911178264887	3.32737721611823	0.991979859301364	0.35875012725901	0.999880997596556	-5.12006906472478
Q15375-1	EPHA7	-0.0963523942880822	3.32222293128493	-1.11756907919498	0.305644675543729	0.999880997596556	-5.12021226563387
P51513-1	NOVA1	-0.0552840405319483	3.31834030151686	-1.54494488977923	0.17229370820429	0.999880997596556	-5.12029756551026
Q8N371-3	KDM8	0.0430356205665479	3.32881506279185	1.43555209195584	0.200147091390312	0.999880997596556	-5.12161003884165
Q2PZI1-1	DPY19L1	-0.121742629430433	3.30793764180834	-0.77278035302459	0.468404652825132	0.999880997596556	-5.1223037126963
Q9H7P6	FAM125B; MVB12B	-0.0500544132178195	3.33203158886532	-1.20134670822772	0.273985066533653	0.999880997596556	-5.12248374807222
Q9GZP9	DERL2	-0.0822133321854009	3.32702672847486	-0.680086070128701	0.521303117822751	0.999880997596556	-5.12261961976912
Q8TF76-1	GSG2; HASPIN	-0.0503473663147952	3.31070061476081	-1.15642367608549	0.290596656500768	0.999880997596556	-5.12288660908714
Q9UK39	CCRN4L; NOCT	-0.0657925782744561	3.33382165893903	-1.22857086332838	0.2643200092009	0.999880997596556	-5.12290407887808
O60266	ADCY3	0.0861852489321969	3.30654078463871	0.623954330425036	0.555160991087769	0.999880997596556	-5.12317157766724
Q96M27-1	PRRC1	-0.043166728016965	3.3192199516369	-1.7243455600252	0.134378557517139	0.999880997596556	-5.1233222431018
Q5ST30-4	VARS2	0.0567985656862988	3.31509289839124	1.60854429913591	0.157813946300862	0.999880997596556	-5.12332588983984
Q96CN5	LRRC45	0.0591039390629116	3.31624305662575	0.986722166393437	0.361125463309662	0.999880997596556	-5.1234739544154
Q7L775	EPM2AIP1	0.0475637122354573	3.32494246266096	1.34006159993761	0.227778706450739	0.999880997596556	-5.12349330587702
P10606	COX5B	0.0926702061956689	3.30338730258469	1.5566336396965	0.169541788536721	0.999880997596556	-5.12367456293035
P15923-2	TCF3	0.0529254848327389	3.31398209793165	0.756595203035911	0.477365370436373	0.999880997596556	-5.124236040655
Q93062-3	RBPMS	0.0539600029470243	3.33710807443566	0.58552121425134	0.579108885440362	0.999880997596556	-5.12425978082995
Q13428-4	TCOF1	-0.0851923760780975	3.31618151350511	-1.33482452883021	0.22938923022622	0.999880997596556	-5.12496753888888
Q96NT0	CCDC115	0.0634476466194027	3.34139551318323	0.541430259289874	0.607321060303146	0.999880997596556	-5.12514740646892
O95059	RPP14	0.066013733670321	3.29920836570979	1.17946938237827	0.281970668375914	0.999880997596556	-5.12532827350145
O94900	TOX	0.0246552655891994	3.28159298199997	0.287548799884282	0.783170201372526	0.999880997596556	-5.1254382229284
Q14728	MFSD10	0.0517265468991283	3.31488780487402	0.345568252280125	0.741222855841778	0.999880997596556	-5.12556299873239
Q9NWM3-1	CUEDC1	0.0453680069813083	3.31435738212717	0.464457734511441	0.65836540878087	0.999880997596556	-5.12563641574808
Q96ND0	FAM210A	0.0493199754530762	3.28583901379893	1.05705781717426	0.330368290408854	0.999880997596556	-5.12566356813084
Q96B36-3	AKT1S1	0.0612058246010431	3.31876279648986	1.17532404285261	0.283505995514463	0.999880997596556	-5.12568382344909
Q96BM9	ARL8A	-0.0908636298756972	3.31838139825014	-0.948546591266204	0.378745416749547	0.999880997596556	-5.12581602719351
Q15165-1	PON2	-0.151692745066311	3.33218401361138	-1.02298381112396	0.344994295385504	0.999880997596556	-5.12589159197507
Q9Y3D0	FAM96B	0.144087878417239	3.29717788165699	1.13063884020705	0.300511536231931	0.999880997596556	-5.12616209122809
Q9NQZ7	ENTPD7	-0.0162701557119473	3.33131169369199	-0.158691865417147	0.879013158275031	0.999880997596556	-5.12630387014036
Q7Z5Q1-6	CPEB2	-0.039952549456556	3.35227840143629	-0.272425148263949	0.794243428348665	0.999880997596556	-5.12640388525381
O15033-1	AREL1; KIAA0317	-0.0394715604751009	3.30862640569135	-0.359942848988028	0.730971691011169	0.999880997596556	-5.12673870515808
P62508-5	ESRRG	-0.0504131707984452	3.30927789466258	-1.48859161907899	0.186158170516352	0.999880997596556	-5.12709653087221
O75173	ADAMTS4	-0.0199520406541495	3.34563223662607	-0.207481937333588	0.842357811254694	0.999880997596556	-5.12751247735843
Q96IQ9-2	ZNF414	0.0511271599365831	3.31708416189039	0.921068739205405	0.391835501402693	0.999880997596556	-5.12803905531768
Q96PY5-3	FMNL2	-0.079653549304766	3.31960406065669	-0.935384788463676	0.3849728165181	0.999880997596556	-5.12826711879198
A0JLT2	MED19	-0.0539870306781469	3.3135975978819	-1.01711618316173	0.347564782681055	0.999880997596556	-5.12917347656059
Q9UJX5-3	ANAPC4	0.0438760031618848	3.32159899082495	1.52348213456512	0.177456257807531	0.999880997596556	-5.12963245344012
Q9UI14	RABAC1	-0.0578935097747849	3.31486165048055	-0.77140325653845	0.469162479770184	0.999880997596556	-5.1303830885562
Q6NS38-1	ALKBH2	-0.108294246436049	3.31485689048667	-1.24600555695558	0.258286736198522	0.999880997596556	-5.13054629949454
O43852-3	CALU	0.0884264731093177	3.32057487898836	1.53490552077432	0.174690751882951	0.999880997596556	-5.13070921907257
P49810-1	PSEN2	0.0915712403482406	3.2927171242799	0.739597755456354	0.486902280937668	0.999880997596556	-5.13109304191457
Q96NJ6	ZFP3	-0.0149116823218111	3.32259357117906	-0.13406703057068	0.897644981349036	0.999880997596556	-5.1311003740623
Q8IWJ2	GCC2	-0.030225755699727	3.32078407645545	-2.04172808188835	0.086255672693426	0.999880997596556	-5.13137254095561
Q8TF01	PNISR	0.0544860632071477	3.31176196239091	1.55086361634166	0.170895035846566	0.999880997596556	-5.13139878625012
Q96ST8	CEP89	-0.0109592786588213	3.3166337100334	-0.127159322149259	0.902884929451489	0.999880997596556	-5.13180612451212
Q969T3	SNX21	0.0514869624176803	3.34970068438833	0.281970079244856	0.787248544438465	0.999880997596556	-5.13210807721023
Q9H819	DNAJC18	-0.013515885464137	3.31792905931667	-0.111265248827797	0.91496144308451	0.999880997596556	-5.13212813054234
B7U540	KCNJ18	0.0110875671921353	3.31199392409625	0.10336419048827	0.920974216793467	0.999880997596556	-5.13287686933475
P35613	BSG	0.288948477820477	3.31096246097396	1.13116667321754	0.300305756218532	0.999880997596556	-5.13309348080232
Q9NXB0-1	MKS1	0.054440869907481	3.32551019061529	0.978498829822506	0.364865498796853	0.999880997596556	-5.13330004595203
Q9Y5J9	TIMM8B	0.39165890164428	3.1905092992059	1.33729721994518	0.228627553285763	0.999880997596556	-5.13367953451293
Q9NZJ5	EIF2AK3	-0.0670201942936306	3.32513790513858	-0.917058049113413	0.393774790735549	0.999880997596556	-5.13420478091509
Q9UKA4	AKAP11	-0.0360019308137276	3.320594534614	-1.79161143846107	0.122350888986343	0.999880997596556	-5.13457667385493
Q9Y2A4	ZNF443	-0.00840056120185072	3.35683807746171	-0.0822561675256234	0.937064406952129	0.999880997596556	-5.13476183346418
O96020	CCNE2	0.0480391566929303	3.34798563663781	0.564615025927612	0.59238932403016	0.999880997596556	-5.13485339043253
P60880-2	SNAP25	-0.153414744521516	3.31377286223096	-1.0113640809222	0.350099523338139	0.999880997596556	-5.13497023065327
Q9Y2Y6	TMEM98	0.0323201308566717	3.32050401962733	0.326885034801211	0.754633464234266	0.999880997596556	-5.13510609090107
Q9NUE0	ZDHHC18	-0.0248089636312394	3.35993032642289	-0.267002607218524	0.798226636968582	0.999880997596556	-5.13521728390176
P07225	PROS1	0.0302901855221736	3.32592891569779	0.167421999821261	0.872427255394367	0.999880997596556	-5.13523412157941
Q6UX15-2	LAYN	0.0539680438689418	3.30573049687295	0.490450591026274	0.640882770621266	0.999880997596556	-5.13539948418059
Q8NB15-2	ZNF511	0.0326330799789078	3.32652602857052	0.378816463091553	0.717603852889776	0.999880997596556	-5.13540788269867
Q9C0D0	PHACTR1	-0.100423513513435	3.31297679209272	-1.19278720874426	0.277086046249376	0.999880997596556	-5.13542287007043
Q9NWV8	BABAM1	0.0412472940956558	3.32992176570411	1.63927770847583	0.151238065578527	0.999880997596556	-5.13557885756414
P36897-2	TGFBR1	-0.0457979173293578	3.3101982652927	-0.486362794998566	0.643616006735681	0.999880997596556	-5.13568765132555
Q8TF42	UBASH3B	0.0558200856089964	3.3260343135552	1.24004770880804	0.260334833607258	0.999880997596556	-5.13621893314308
Q9UPQ4	TRIM35	-0.153593374590101	3.29386038742441	-0.840555149682234	0.432167977431869	0.999880997596556	-5.13636895422687
Q9UFF9	CNOT8	0.0642950681987663	3.32303085056243	1.30022495899685	0.240287125296559	0.999880997596556	-5.13660942032814
Q92994	BRF1	0.04731349147904	3.31852304592235	1.26827002279616	0.250756999419709	0.999880997596556	-5.13661681696269
Q96S16-1	JMJD8	-0.0499542151972769	3.32894941044893	-0.501373107441678	0.633609758851981	0.999880997596556	-5.13671050531724
Q9BYC9	MRPL20	-0.114271974910263	3.29534962525197	-1.23720153097806	0.261318228681153	0.999880997596556	-5.13732766620391
O14490	DLGAP1	0.0717738292672531	3.33306691288793	1.06027978260869	0.32901173848179	0.999880997596556	-5.13747289503913
P52907	CAPZA1	-0.0787690999201549	3.3157742459843	-1.96351206852106	0.0962215873466006	0.999880997596556	-5.13781152485573
O15392	BIRC5	-0.0810879176235299	3.32923589796565	-1.41057328216094	0.207064272534411	0.999880997596556	-5.1379355438602
Q8WUA7	TBC1D22A	0.0951063309510576	3.32613733531171	1.29302763372105	0.242611009120487	0.999880997596556	-5.13838422307299
P31350-2	RRM2	0.0291641251727628	3.32572979112587	1.86237394230627	0.110837123596525	0.999880997596556	-5.13840901937441
Q13873	BMPR2	0.0605466181993135	3.30783473404491	0.911443389024693	0.396501927018811	0.999880997596556	-5.13878765346143
A6NNL5	C15orf61	-0.0407503917093548	3.29227682978392	-0.351284397736863	0.737139328973728	0.999880997596556	-5.13948507045232
Q9BWT1-2	CDCA7	-0.0766150236389921	3.33021649266373	-1.2140722672521	0.269429962770499	0.999880997596556	-5.13961538063154
Q9Y6R9	CCDC61	-0.0276967570549014	3.31997353553707	-0.327101854398522	0.754477285881727	0.999880997596556	-5.13980272793873
P36873-2	PPP1CC	-0.0530701751820198	3.3313771227405	-1.24791834552089	0.25763217187574	0.999880997596556	-5.14009125166262
Q5T4T6	SYCP2L	-0.0447332566640631	3.33518388644847	-0.568712062475726	0.589772869353849	0.999880997596556	-5.1401328460285
Q2YD98-1	UVSSA	0.0498684565846926	3.33996518773336	0.556261144288466	0.597745022183197	0.999880997596556	-5.14031123881066
Q96EX2-1	RNFT2	-0.0655799233995451	3.32109552189702	-0.592723001123068	0.574575049086213	0.999880997596556	-5.14042801752658
Q75V66	ANO5	0.0318317457361938	3.33539840498575	0.401222383640258	0.701874935540147	0.999880997596556	-5.14065230550338
Q86UQ0-1	ZNF589	0.0578857748864959	3.31471006249532	0.613803392350674	0.56142658594062	0.999880997596556	-5.14079199426583
Q4G176	ACSF3	-0.0573471871042323	3.29839741209685	-0.931241042713578	0.386949641790503	0.999880997596556	-5.14121872972985
Q9Y3T6	R3HCC1	-0.0619826999549688	3.32041028455684	-0.935979650382286	0.384689669279919	0.999880997596556	-5.14147643899397
Q7Z2W9	MRPL21	0.0568391737747199	3.33481369313971	1.06578329093831	0.326705097132522	0.999880997596556	-5.14179807139689
P05452	CLEC3B	-0.210931544558457	3.34661142073006	-0.866866725625617	0.418662681512041	0.999880997596556	-5.14206246329659
Q8TAP8	PPP1R35	0.027492531792008	3.31958036962408	0.364540548906715	0.727705488309224	0.999880997596556	-5.14230248252262
P19438-1	TNFRSF1A	0.0382175515536332	3.31433116067337	0.475263280544877	0.651068144157952	0.999880997596556	-5.14279855234295
Q9NX00	TMEM160	-0.0450145847352901	3.27713249872759	-0.263919813874881	0.800494115645882	0.999880997596556	-5.14331306435201
Q9NP90	RAB9B	-0.0824020134161823	3.30585289563335	-0.637020872114757	0.547159476660567	0.999880997596556	-5.14338456025143
Q9UPT9-1	USP22	0.0469474195662972	3.3204841732956	1.55522678837072	0.169870805511167	0.999880997596556	-5.14344770682532
O75223-1	GGCT	0.0447092298271611	3.32137398400985	1.85827064176347	0.111474551194845	0.999880997596556	-5.14351163881463
Q6PI26	SHQ1	0.0550129584666674	3.32649114901502	1.40883849534591	0.207552689592044	0.999880997596556	-5.14421316218623
P16278	GLB1	0.0560582053236755	3.32557297303312	1.57711055275519	0.164820390950296	0.999880997596556	-5.14475142047063
Q9Y385	UBE2J1	0.0799793946514746	3.30606349623389	0.733436668360366	0.490391002695632	0.999880997596556	-5.14493920273558
Q06828	FMOD	0.0771578758339533	3.34783430564258	0.820489839504836	0.442678981123307	0.999880997596556	-5.14508004130342
Q3SXY8	ARL13B	0.0534104653445204	3.32774196161404	0.914003787754726	0.395256520359172	0.999880997596556	-5.1455842208494
P14174	MIF	0.0590711956962907	3.34027376446947	1.67399174359559	0.144125698022526	0.999880997596556	-5.14564491838116
Q14574-1	DSC3	-0.0517038574266017	3.31563253557831	-1.06112610835778	0.328656162222686	0.999880997596556	-5.14567417654541
Q9HCI5	MAGEE1	0.0226541108307155	3.3137710283224	0.228995735020983	0.826324565823301	0.999880997596556	-5.14593855116377
O43677	NDUFC1	0.203010947075816	3.29499684756402	1.11653440336103	0.306054154157147	0.999880997596556	-5.14616348341866
Q9NQ84-2	GPRC5C	0.0703985239367821	3.31387138125228	1.26994359708525	0.250198856018243	0.999880997596556	-5.14626733910612
Q6N043	ZNF280D	-0.0614671732452978	3.31219290510512	-1.57896314212196	0.1643994159829	0.999880997596556	-5.14645737155688
Q9BST9	RTKN	0.0407536003408022	3.31383488216686	0.594918781449105	0.573196929824388	0.999880997596556	-5.14670241827769
Q9UJP4-1	KLHL21	-0.00516677322296513	3.34758324436953	-0.0580080638068744	0.955587806706625	0.999880997596556	-5.14749515306901
Q9Y2K9	STXBP5L	-0.0495968317902943	3.32211715410704	-1.24163894511712	0.259786443370016	0.999880997596556	-5.1476501385126
Q15291-1	RBBP5	-0.0302481394283958	3.3323542682098	-1.84102341637647	0.11419369081902	0.999880997596556	-5.14780468409499
O15121	DEGS1	-0.136091597138139	3.3098857921263	-0.795945438664829	0.45578499449392	0.999880997596556	-5.14791148044635
Q9NQ69-4	LHX9	0.0293485393986823	3.29749657834597	0.375834828468899	0.719708604876127	0.999880997596556	-5.14857345434739
Q15040	JOSD1	-0.00811634090103791	3.32517686579378	-0.0854871289423041	0.934599203242527	0.999880997596556	-5.14896139527714
P08236	GUSB	0.0529877183223494	3.31006229482406	1.37809727302603	0.216383282086523	0.999880997596556	-5.15045010447297
P53794	SLC5A3	-0.0294069586421671	3.33910553552977	-0.2496901386576	0.810987594484411	0.999880997596556	-5.15045568107447
P24941-1	CDK2	0.0788689457715908	3.31525903772144	1.61070397279818	0.157343091988422	0.999880997596556	-5.15079822217931
Q12809	KCNH2	0.00621434624030549	3.32807696582915	0.0625441551270382	0.952119951342749	0.999880997596556	-5.15136406033041
Q6P1S2-1	C3orf33	0.0776134362832878	3.30212101047783	0.493652887808519	0.638745886496597	0.999880997596556	-5.15171832130702
Q9Y3L3-1	SH3BP1	-0.052612556054123	3.31804754891353	-1.76953166562255	0.126178253716709	0.999880997596556	-5.15210284451839
Q6ZN55-2	ZNF574	-0.0341803866030514	3.32072414624746	-1.62286690034485	0.154716189777879	0.999880997596556	-5.15223125469366
P51688	SGSH	-0.0504920117874995	3.32632862525765	-0.48229578057973	0.646341394003395	0.999880997596556	-5.15240128133855
Q8N165	PDIK1L	0.0391521297928169	3.33191303462694	0.534758224329292	0.611657118734553	0.999880997596556	-5.15245415377491
Q08117	AES	-0.0487197686132737	3.32551150470944	-0.792007516646966	0.457913150570565	0.999880997596556	-5.15296852792164
Q9H7B2	RPF2	-0.0470831882722073	3.31253913657106	-1.62009759614481	0.155310594580407	0.999880997596556	-5.15306645250812
Q8N3J2	METTL4	-0.0411109923283074	3.33663368163977	-0.644788991376915	0.542436780302956	0.999880997596556	-5.15324863876141
Q8WUK0	PTPMT1	0.0481910582690566	3.34610071702399	0.867365296315103	0.418409818164713	0.999880997596556	-5.15341821421802
P61968	LMO4	-0.0485712831205646	3.29908471065978	-1.07986633408793	0.320862795037334	0.999880997596556	-5.15343132002042
O60609-1	GFRA3	-0.00997958453689289	3.34422933647401	-0.115418848319602	0.911802950389614	0.999880997596556	-5.15353181506874
O15055-1	PER2	-0.0465640385348366	3.29547042903966	-0.666746419587889	0.529226958130953	0.999880997596556	-5.15357309012357
Q13761-2	RUNX3	-0.0195631086334269	3.32923358500582	-0.256413022274649	0.806024399361301	0.999880997596556	-5.15378684388309
Q8WTS1	ABHD5	0.0484314802276797	3.3358006552814	0.650913523161134	0.538731427533709	0.999880997596556	-5.15395211926419
Q8TEY5	CREB3L4	0.0268789450643025	3.29440096416685	0.304792422630319	0.770612180996514	0.999880997596556	-5.15445783610071
Q96JJ6	JPH4	0.06032619056818	3.34231157425656	0.987380749952813	0.360827247432872	0.999880997596556	-5.1546636656335
Q01094	E2F1	-0.0123097392386195	3.31060558236372	-0.145920891379199	0.888666318863962	0.999880997596556	-5.15520613264262
Q8IX07	ZFPM1	-0.0450687831722028	3.33183264818889	-1.42592892434707	0.202786525120114	0.999880997596556	-5.15524680565313
P17787	CHRNB2	0.017515619336535	3.3298874642627	0.203421547548693	0.845393374209011	0.999880997596556	-5.15561705515869
Q8IZD0-2	SAMD14	-0.0369889061658189	3.33587855461236	-0.433050922596761	0.679807086265807	0.999880997596556	-5.15608773512141
P50238	CRIP1	-0.0426426720667246	3.30015600920723	-0.681686737133564	0.520357499076514	0.999880997596556	-5.156131754007
Q53S58	TMEM177	0.00982035522159254	3.33625750612854	0.0909943206661623	0.930399088881124	0.999880997596556	-5.15638443652479
Q13496	MTM1	-0.00796738954713944	3.29440547390409	-0.0841271820127617	0.93563673970549	0.999880997596556	-5.15657609545829
O43581-3	SYT7	-0.066214270701854	3.29463984518018	-0.440129432657468	0.674944960556173	0.999880997596556	-5.15737715751293
O94854	KIAA0754	-0.0631679580736725	3.31671828086708	-1.50399995941227	0.182267343748985	0.999880997596556	-5.15764791462117
Q7Z6J9	TSEN54	-0.0515265508467214	3.33067166694091	-1.39366359122802	0.21187001317743	0.999880997596556	-5.15767614692921
P13796	LCP1	0.0748093416437205	3.33471971602523	1.85992350835037	0.111217351371137	0.999880997596556	-5.15935276768489
P22392-2	NME1-NME2; NME1; NME2	0.165075974238689	3.32587834093819	0.975857708839673	0.366073146945331	0.999880997596556	-5.15973469373193
P51687	SUOX	-0.062164989188171	3.32759809997327	-1.21400874027172	0.269452539062737	0.999880997596556	-5.16035740898229
Q02386	ZNF45	-0.041307372591181	3.33124075743033	-0.39261670235718	0.707897624339723	0.999880997596556	-5.16074895061769
Q14129	DGCR6; LOC102724770	-0.00256460557162401	3.3347801867651	-0.0318651890184167	0.975592232283135	0.999880997596556	-5.16091212414418
O75110	ATP9A	0.0969447695453747	3.30512565302167	0.847238534872969	0.428707631424431	0.999880997596556	-5.16092657768868
Q8WYQ9	ZCCHC14	-0.0397766041472992	3.33888586731259	-0.481843140146863	0.64664508886849	0.999880997596556	-5.160960816189
P31153	MAT2A	0.0371236604888525	3.3266102768235	1.50559946835426	0.181867809989835	0.999880997596556	-5.16193530003157
Q9Y5Z4-1	HEBP2	0.0738897457447586	3.31395293837492	1.37369623202283	0.217675001002818	0.999880997596556	-5.16225830431909
Q68D10-1	SPTY2D1	-0.0717916120475513	3.32666678415702	-0.873978247920813	0.415066598352766	0.999880997596556	-5.16305549898553
Q9NQ11	ATP13A2	0.0311944149312449	3.2982385559626	0.267433948242369	0.797909544421368	0.999880997596556	-5.16373010441921
Q9Y2I7-1	PIKFYVE	0.0885193332981015	3.30910579406396	1.77852506214615	0.124605381440899	0.999880997596556	-5.16411222650172
P60604	UBE2G2	0.0598835831208779	3.33612474654017	1.3917609652714	0.212417039187834	0.999880997596556	-5.16425554319022
Q9Y6X2	PIAS3; LOC101060431	-0.0519273274895928	3.32849379916725	-0.982142359839915	0.36320464698912	0.999880997596556	-5.16448527064346
Q8IXM2-3	C17orf49	-0.0699419563623598	3.31740839902421	-1.3347672515104	0.229406900550643	0.999880997596556	-5.16449686138534
Q9BVL4	SELO; SELENOO	0.0461360974097193	3.32144316106357	0.882524854690981	0.410775322303128	0.999880997596556	-5.16505943506444
Q9NX04	C1orf109	0.0160768631918148	3.36530078328406	0.134397529824501	0.89739441483436	0.999880997596556	-5.16537166654091
Q5SWA1	PPP1R15B	-0.0226224247551827	3.32892625379588	-0.281041171720613	0.787928345064504	0.999880997596556	-5.16538628000893
Q64LD2-1	WDR25	-0.124069091435071	3.3202777937269	-0.586482438950014	0.578502529302953	0.999880997596556	-5.16540335363964
P17655-1	CAPN2	0.0525047861042112	3.31016871394593	1.58088751350287	0.163963206301817	0.999880997596556	-5.16541786881745
Q5VTL8	PRPF38B	0.0740980500417604	3.32273680127689	1.54442883990741	0.172416165981543	0.999880997596556	-5.16560686023035
Q9Y3L5	RAP2C	0.0507167729812099	3.32259182890863	0.748072361056126	0.48213120148079	0.999880997596556	-5.1659139437704
Q99457	NAP1L3	0.020070152401695	3.32999888500933	0.193038254035333	0.853169017922623	0.999880997596556	-5.16609092481737
Q9BX70-1	BTBD2	-0.0196809169713965	3.33992111406835	-0.222428965148606	0.831209210192991	0.999880997596556	-5.16622153110829
Q86XK3-2	SFR1	0.0819662345734102	3.31604888540965	0.743046620874243	0.484956748362973	0.999880997596556	-5.16660516194617
Q8TDD1-2	DDX54	0.0318675291747645	3.30824855487157	1.8168740062256	0.118111273430962	0.999880997596556	-5.16669652916496
P41091	EIF2S3	-0.0499547451632828	3.32700378905536	-2.05158230596498	0.0850762783910123	0.999880997596556	-5.16675584553563
Q9NZ72	STMN3	0.0980383859945407	3.31631334905992	1.2348063861104	0.262148286516367	0.999880997596556	-5.16711434305738
Q66K14-1	TBC1D9B	0.0755277953398473	3.3215883252565	1.55856274430434	0.169091608796801	0.999880997596556	-5.1671602843081
O14561	NDUFAB1	0.286724299308241	3.25467004374543	1.37166056997445	0.218274827867204	0.999880997596556	-5.16723890396631
Q6NVY1	HIBCH	0.0532474143109015	3.30282528295829	1.76170931041867	0.127562078184651	0.999880997596556	-5.16727878069642
P28676	GCA	0.0507706098542235	3.35454525179544	1.04418127349115	0.335835245742278	0.999880997596556	-5.16730389230684
Q3KRA6	C2orf76	-0.0304308895897263	3.33887256240212	-0.321198279373309	0.758734215582716	0.999880997596556	-5.16731076702964
O15120	AGPAT2	-0.099740991599093	3.29450208977137	-0.786645591363852	0.460822153270891	0.999880997596556	-5.16733077704252
A8K8P3	SFI1	-0.0392681442552505	3.34219630964229	-0.428401187929708	0.683010103880079	0.999880997596556	-5.1673668376096
Q6ZRY4	RBPMS2	-0.0349373250648265	3.33375907102017	-0.518888010381469	0.622039924027459	0.999880997596556	-5.16737586455875
Q9H799-1	C5orf42	0.0899211713411904	3.34410685907883	0.810914096367271	0.447759641537128	0.999880997596556	-5.16741131798597
O75365-1	PTP4A3	-0.0117716979869885	3.30604987836186	-0.146076213251309	0.888548787172311	0.999880997596556	-5.16861408774114
Q5VV42	CDKAL1	-0.0933527693342083	3.30407371029803	-1.06724290429739	0.326095563382214	0.999880997596556	-5.16887149893725
[truncated: 6,469 more rows]
