# Supplementary material for: Thalidomide promotes degradation of SALL4, a transcription factor implicated in Duane Radial Ray syndrome
Source: eLife journal article supplement (doi:10.7554/elife.38430), 2018-08-01
Supplement: supp [file elife-38430-supp-v1.zip › elife_poa_e38430_Figure_1_source_data_6.csv]

	ID	logFC	AveExpr	t	P.Value	adj.P.Val	B
Q96JP5-1	ZFP91	-0.985203126114106	3.27981218153107	-24.5095383277192	1.64563827307951e-05	0.0577776149659495	1.37030936927288
Q9UJQ4	SALL4	-1.87169299891731	3.5861431498019	-23.2007909037114	2.04691597659245e-05	0.0577776149659495	0.772572749066288
P51157-1	RAB28	-0.777764242138188	3.37226517991336	-11.196418978849	0.000362489149503787	0.486183736829006	-0.467776568779716
P56211	ARPP19	0.612328277858185	3.27621405347939	7.77304908840614	0.00147734511902868	0.999772751739274	-0.479492246721027
P20674	COX5A	0.35335786142539	3.30924731353693	7.32069543273307	0.00185314949190914	0.999772751739274	-0.653399936669795
P02751	FN1	-0.54953112007672	3.42392224141785	-6.33775418364657	0.00317460775084545	0.999772751739274	-1.00058276045608
O15060	ZBTB39	-1.12550747390786	3.19634017857844	-10.9035455104049	0.000401899640741975	0.486183736829006	-1.00683441672615
Q9Y696	CLIC4	-0.17469880873548	3.30724981174142	-6.35930693572705	0.00313500628182768	0.999772751739274	-1.00833634349752
Q17R98	ZNF827	-1.65431637958851	3.35793104043383	-16.646155946854	7.63462209991131e-05	0.129299959884098	-1.01733644731862
P18859-2	ATP5J	2.10616217693712	2.84699264335022	20.652659264411	3.24931357086298e-05	0.0687879682951694	-1.03518999520145
P07602-3	PSAP	0.352468933883517	3.27575003040407	5.92558830421312	0.00406519737380878	0.999772751739274	-1.23371768378509
O14810	CPLX1	0.793522531166527	3.20548546153392	7.35779252570826	0.00181818343196759	0.999772751739274	-1.29715768290967
P84090	ERH	0.184879733468664	3.31557885807645	5.78875910622595	0.00442704694252141	0.999772751739274	-1.37132835223912
Q92688	ANP32B	0.220074359169741	3.3338808098786	5.43255031596323	0.00557187542223966	0.999772751739274	-1.54353790099647
Q14061	COX17	0.784966496399753	3.25027804347482	5.39187245585881	0.00572456810650221	0.999772751739274	-1.95252947504856
Q96EI5-2	TCEAL4	0.220934382812839	3.30938361381555	4.69035873583755	0.00937726859686053	0.999772751739274	-2.07206463517122
Q15811	ITSN1	0.231737802067011	3.23264897973021	4.48739902862625	0.0109298262910396	0.999772751739274	-2.16197420166135
Q9BU19-5	ZNF692	-2.96144876543962	3.68931431207332	-25.6374991629986	1.37591435313793e-05	0.0577776149659495	-2.16921935761146
Q92890-1	UFD1L; UFD1	-0.220758762040359	3.33409877053647	-4.50474229340851	0.0107855456113953	0.999772751739274	-2.17963918580063
P62888	RPL30	-0.13887832133033	3.35090497011833	-4.67606822664868	0.0094774327674743	0.999772751739274	-2.21006383459083
Q8N5C7-1	DTWD1	-0.971281187637033	3.23140344454995	-4.40027201371642	0.0116910385800278	0.999772751739274	-2.2335265840028
P62942	FKBP1A	0.147243489952623	3.32494537643929	4.40419125339152	0.0116554449161754	0.999772751739274	-2.27250998560198
Q08211	DHX9	0.0671296534914699	3.32379783097074	5.17519257783818	0.00662982907831832	0.999772751739274	-2.37544656366056
O95926	SYF2	0.270770413363031	3.27107823984447	4.17259667492485	0.0140043713462498	0.999772751739274	-2.39963349469957
Q8WUW1-2	BRK1	0.30468679061662	3.2586882812423	4.15618043064343	0.014191631112177	0.999772751739274	-2.44581545093821
Q96BD0	SLCO4A1	0.954934571291947	3.1949795730403	6.12455524743971	0.00360148350440344	0.999772751739274	-2.53783946031457
P49458	SRP9; SRP9P1	-0.13525076627139	3.32762478245285	-4.07930102721804	0.0151098108859409	0.999772751739274	-2.55015283895169
Q99622	C12orf57	0.364456786234414	3.29444433696111	4.38128884779219	0.0118653122560611	0.999772751739274	-2.57161755822428
Q9H1E3	NUCKS1	-0.224740284472102	3.33012039057986	-4.29283362035333	0.0127200195738227	0.999772751739274	-2.64431522104067
Q15121-2	PEA15	0.549892725868067	3.20800339888181	3.82049781069143	0.0187733674745185	0.999772751739274	-2.65873080646476
Q6ZSJ8	C1orf122	0.795051357655102	3.29174589398368	6.10769979118875	0.00363815775695598	0.999772751739274	-2.66093300581014
P62249	RPS16	-0.152217717448513	3.31782811289126	-4.12002234536636	0.014614841600863	0.999772751739274	-2.68794577140467
Q9P0P0	RNF181	0.33194371920611	3.25577668690484	4.05851711850918	0.0153702139081427	0.999772751739274	-2.70258882330102
Q9H116	GZF1	-0.266455652774694	3.38747057452845	-3.69747109141454	0.0208848816735515	0.999772751739274	-2.7483219766731
Q9Y3C8	UFC1	-0.230440430980048	3.30331693177731	-3.65388610245658	0.0217002901740499	0.999772751739274	-2.83023438172245
Q9H814	PHAX	-0.118494067515307	3.34039237271186	-3.71121988129114	0.0206352927502039	0.999772751739274	-2.87004305439353
O43805	SSNA1	0.334639912037335	3.22782346837172	3.61125176767606	0.0225349474023166	0.999772751739274	-2.8834354808667
Q9BWJ5	SF3B5	0.63631025112384	3.23472139171278	3.62751221249611	0.0222121722259199	0.999772751739274	-2.89248290418012
Q96A37-1	RNF166	-1.62304564705952	3.55955938397325	-10.3604263037481	0.000490158390250041	0.518832656079668	-3.01586488011911
Q86UP2-1	KTN1	0.232512184385601	3.3410312414838	3.30330932710902	0.0298447107273805	0.999772751739274	-3.0596486996175
P17096-1	HMGA1	-0.182479027799394	3.36379420235422	-3.30112714268105	0.0299057806467192	0.999772751739274	-3.06451226207085
P49006	MARCKSL1	0.124942852502544	3.30563791091963	3.7060119497193	0.0207294133884217	0.999772751739274	-3.0714227105278
P42892	ECE1	0.159851705057078	3.29486667336539	3.43044453651136	0.0265285556174414	0.999772751739274	-3.07886623462839
Q13404-1	TMEM189-UBE2V1; UBE2V1	-0.152381863895219	3.33106994383452	-3.36876058375972	0.0280797700814733	0.999772751739274	-3.12096672892592
Q9Y5J9	TIMM8B	0.978798683606444	3.23937951928538	3.22868723206224	0.0320194774438707	0.999772751739274	-3.12238148184698
Q70UQ0-4	IKBIP	0.124835228456424	3.3441168203511	3.3372819735503	0.0289127271945955	0.999772751739274	-3.13781693560575
P30086	PEBP1	0.136887791064311	3.34809535350364	3.87922743933666	0.0178559809729598	0.999772751739274	-3.145449527591
P12259	F5	-0.31195161419687	3.46080264368534	-3.25822402320858	0.0311369928637687	0.999772751739274	-3.1588241225652
P00491	PNP	-0.0880072098479793	3.3226075434898	-3.58836057581978	0.0229988769253183	0.999772751739274	-3.16460685405026
Q8N6N7	ACBD7	0.436031119027699	3.26982344668531	3.17614972786078	0.0336631784862301	0.999772751739274	-3.17495837384754
P41227-1	NAA10	-0.132484223259797	3.32489622281278	-3.4729656401191	0.0255183151705634	0.999772751739274	-3.20089063121595
P82979	SARNP	-0.136339194197581	3.32485422341736	-3.34994061737183	0.0285742952131043	0.999772751739274	-3.20806106925513
Q7Z3U7-1	MON2	0.115997270211827	3.29365549490586	3.37711217697999	0.0278635705705239	0.999772751739274	-3.21711042767593
Q9BW30	TPPP3	-0.255376726385113	3.35863145290239	-3.17421936465688	0.0337254416158215	0.999772751739274	-3.21898357158056
Q9C005	DPY30	0.972324287504199	3.11094810083041	3.2003054450645	0.0328953813469778	0.999772751739274	-3.23920703083017
A1L170-2	C1orf226	0.197610900218988	3.28042500672496	3.06457290284465	0.0374952369379611	0.999772751739274	-3.25471578461264
Q96SZ6-3	CDK5RAP1	0.190509174917191	3.30854309488701	3.20130673910383	0.0328640029363072	0.999772751739274	-3.2551824073428
P40926	MDH2	0.0828777538879371	3.32692021132942	3.85706153279761	0.0181957686918388	0.999772751739274	-3.31975559615139
P38398-7	BRCA1	0.101306311543444	3.32432743202	3.34725326866871	0.0286457482577601	0.999772751739274	-3.32035294892607
P05423	POLR3D	0.111555587454328	3.31401902522255	3.21106804907368	0.0325599457400788	0.999772751739274	-3.32429886080355
Q86Y97	SUV420H2; KMT5C	-0.36460691134225	3.31601131143948	-3.25524444943162	0.0312247012962961	0.999772751739274	-3.32993555869762
Q8WXE9-3	STON2	0.58156243473562	3.08906777540735	2.95988130194404	0.0415639508654734	0.999772751739274	-3.33986832729319
P48047	ATP5O	-0.176385338168492	3.32003011504917	-3.13311168161755	0.035084098505881	0.999772751739274	-3.34243367388616
P20645	M6PR	0.153721098756108	3.2955869760642	3.06412181950222	0.0375117383710844	0.999772751739274	-3.35600196117618
O75531	BANF1	0.941619625387867	3.22243389125008	2.92378478350402	0.0430849540315246	0.999772751739274	-3.37627546094322
O43809	NUDT21	-0.190337913307443	3.30231789527853	-3.19556410460331	0.0330444451444212	0.999772751739274	-3.38290853496481
P36404	ARL2	-0.184406962681228	3.2963125692818	-3.03257811603695	0.0386870733466553	0.999772751739274	-3.38941711217629
Q49B96	COX19	0.191837405372635	3.3022005207811	2.92898555481374	0.0428618520129996	0.999772751739274	-3.40858567646453
Q93050-3	ATP6V0A1	0.0934405128943722	3.29421122746216	3.255724049316	0.0312105638396924	0.999772751739274	-3.41144294415579
Q9NZM3	ITSN2	0.121965325400326	3.28060589029262	3.29905350744636	0.0299639497133524	0.999772751739274	-3.41746915294255
P61970	NUTF2	-0.167890562914189	3.281507151159	-3.11943190641071	0.0355504388936514	0.999772751739274	-3.41884233010501
Q9BZQ6	EDEM3	0.145582468915267	3.31248777643484	2.99777849508305	0.0400341221183179	0.999772751739274	-3.442180418457
Q8NFD5-3	ARID1B	-0.0737507949775484	3.3323309291098	-3.42121979259676	0.0267539487789505	0.999772751739274	-3.44348510407509
Q5VWZ2	LYPLAL1	-0.169187363925924	3.31606312754976	-2.88999207525267	0.0445680245551792	0.999772751739274	-3.45139398284661
P78330	PSPH	-0.13056364303493	3.30153662732631	-3.08303953082631	0.0368269482649833	0.999772751739274	-3.47162267438303
Q16763	UBE2S	-0.10739956268358	3.3101995814144	-3.03034500074675	0.0387719040210479	0.999772751739274	-3.47766960224863
Q16143	SNCB	-0.365667207669761	3.33433733443074	-2.83426899519149	0.0471454242706211	0.999772751739274	-3.48407871232819
Q9Y250	LZTS1	0.117691146849617	3.32630874828505	3.01637620337744	0.039307516666608	0.999772751739274	-3.4852405653142
Q53HL2	CDCA8	-0.127835552745014	3.34177651198874	-2.93608695742639	0.0425593900984729	0.999772751739274	-3.48688363955995
Q8N6N3	C1orf52	0.204003972775425	3.31107965125809	2.76729552583224	0.0504756620044984	0.999772751739274	-3.50165500083094
Q96PB7-1	OLFM3	-0.382989431076545	3.28484399198634	-2.81359526219584	0.0481454430664908	0.999772751739274	-3.51178872329747
O60925	PFDN1	0.139201271934705	3.2558101264806	2.91379638206942	0.0435172454286827	0.999772751739274	-3.52248561129634
Q9Y4P1-1	ATG4B	-0.136618170947195	3.30996660135612	-2.81018530415034	0.0483127436378278	0.999772751739274	-3.54183891885307
P07437	TUBB	0.139433981102475	3.32808512733494	3.15373626357973	0.0343945391254655	0.999772751739274	-3.55199631531294
P43007-1	SLC1A4	0.36826320375433	3.33872760284634	2.7243298920605	0.0527556591883299	0.999772751739274	-3.55633571911365
Q8IYN2	TCEAL8	0.249330639915125	3.28977834223394	2.73536005813026	0.0521591675347453	0.999772751739274	-3.55677671194636
Q9ULJ6-1	ZMIZ1	0.142732360159544	3.28540584976492	2.80450611970437	0.048592877738001	0.999772751739274	-3.5587866097444
Q9GZZ1-1	NAA50	-0.124439595658861	3.31705578912724	-3.17135256198156	0.0338181596853946	0.999772751739274	-3.56989303420944
P61586	RHOA	0.191444351610324	3.29569905903521	2.71594766558033	0.0532142304690776	0.999772751739274	-3.57326675837
P38117	ETFB	0.0789238024396356	3.29984090119297	3.16683403365186	0.0339649079225981	0.999772751739274	-3.57337441623283
P20073-1	ANXA7	-0.0944669718301204	3.31914167948015	-3.00984379475442	0.0395609626970444	0.999772751739274	-3.57508852028079
O60936-3	NOL3	0.400006273190724	3.2588567915953	2.67600852938625	0.0554634120477637	0.999772751739274	-3.58558774613141
Q7L5Y6-2	DET1	0.199314363995061	3.33938431301524	2.65658147460578	0.056596969808474	0.999772751739274	-3.59288244222622
Q9NRW1	RAB6B	0.133965123290558	3.29796481632333	2.75533868285374	0.051098504228702	0.999772751739274	-3.59477650281492
P42126	ECI1	-0.122332373443868	3.27566511309899	-2.87773015918853	0.0451208157387173	0.999772751739274	-3.59617490504897
Q9Y5J7	TIMM9	0.460353380289805	3.2302525627321	2.6857271199946	0.0549061709870163	0.999772751739274	-3.60769918726792
O76003	GLRX3	-0.0949803112556993	3.3201468978312	-3.28869708175646	0.0302564756189258	0.999772751739274	-3.62083465818254
P34947	GRK5	0.148585649893203	3.30011671481802	2.77325930272707	0.050168292556989	0.999772751739274	-3.62435950518906
Q9BYD1	MRPL13	-0.173815985066134	3.3073968306219	-2.70780398285473	0.0536641673389277	0.999772751739274	-3.62611600548765
P62995	TRA2B	0.180749236898251	3.32937598517852	2.79039154019514	0.0492973002919641	0.999772751739274	-3.66572724370409
Q9NRX4	PHPT1	-0.110814724197194	3.33777418127552	-2.87295926414311	0.0453380514589096	0.999772751739274	-3.67417462037247
Q96GP6-1	SCARF2	0.194073001285512	3.32314710949285	2.53259369257435	0.0644919826013439	0.999772751739274	-3.69058153342094
P33121	ACSL1	0.102604199310127	3.31223172328925	2.97865205189303	0.0407978319725471	0.999772751739274	-3.70470040241141
P67870	CSNK2B	-0.0966721814943108	3.31408986495535	-2.83511719666705	0.0471049135847806	0.999772751739274	-3.71059496923676
P57737-3	CORO7-PAM16; CORO7	0.0772693352933212	3.30810946567678	2.99464245420076	0.0401581890541592	0.999772751739274	-3.72005129041754
Q8NEN9	PDZD8	0.126040837733259	3.3463336192671	2.79542929628563	0.0490445280379631	0.999772751739274	-3.72017024110585
Q99453	PHOX2B	-0.117999595271847	3.35111824050996	-2.75353709489198	0.0511931198025423	0.999772751739274	-3.74057009666752
P15848	ARSB	0.200366853009715	3.30573658029689	2.58922527346218	0.060738849332498	0.999772751739274	-3.75196410563437
Q03013-1	GSTM4	-0.34666458176018	3.29063950382391	-2.47015999768599	0.0689405008466406	0.999772751739274	-3.75769891697199
O14737	PDCD5	0.114339690624832	3.32226329375604	2.72068954859894	0.0529542503313514	0.999772751739274	-3.76647626765808
Q6UX04	CWC27	-0.124690453495763	3.35617201680233	-2.65511632856249	0.0566835371278583	0.999772751739274	-3.76659762937441
Q9Y6M5	SLC30A1	0.15819493378159	3.32550640543383	2.58013296910122	0.0613241985234797	0.999772751739274	-3.77295922518122
Q99536	VAT1	0.106793142383092	3.31751750959146	2.91559667937631	0.0434389574080917	0.999772751739274	-3.77485143333843
P53680	AP2S1	0.177890877849169	3.28325663593047	2.44770342679541	0.0706253449537025	0.999772751739274	-3.78967710253483
P50990	CCT8	0.153349952941323	3.31948233990966	2.43148864548577	0.071871020252762	0.999772751739274	-3.81038619351797
Q9BRQ6	CHCHD6	-0.146098735584274	3.37067897772859	-2.54702106520564	0.0635112255818301	0.999772751739274	-3.8227086022357
Q13445	TMED1	0.314744594280216	3.29204796766892	2.47651998423127	0.0684716808581905	0.999772751739274	-3.82289864312132
Q7Z4W1	DCXR	-0.133585493849463	3.33523493720892	-2.6322871332506	0.0580522736377904	0.999772751739274	-3.84124393608128
Q96EP5	DAZAP1	-0.183155683429647	3.37485003374025	-2.45911926987636	0.0697630655349885	0.999772751739274	-3.84621615372087
Q9NZD2	GLTP	-0.147641900381672	3.31333731813867	-2.47750276102047	0.0683995609596849	0.999772751739274	-3.84830074092266
Q15532	SS18	0.182235020512989	3.28656326778959	2.35055957409244	0.0784731684223521	0.999772751739274	-3.85006832297713
P00390	GSR	-0.0779730232468128	3.32286633283785	-2.85970916085033	0.045947789275146	0.999772751739274	-3.85055454566869
Q96AA8-3	JAKMIP2	0.116628714071755	3.32617981572464	2.51526879120345	0.0656926749289325	0.999772751739274	-3.86197531246142
O43929	ORC4	0.0936761358779162	3.31515008565203	2.65861641903766	0.0564769887444607	0.999772751739274	-3.87306388819965
Q14872	MTF1	-0.258588926560026	3.38172532829765	-2.32372050059998	0.0808121409772463	0.999772751739274	-3.87487353006409
P17858-1	PFKL	0.0882027698226952	3.31859838094586	2.69183456588171	0.054559288786887	0.999772751739274	-3.87871813080505
Q9UHL0-1	DDX25	0.227286794656722	3.27150828105142	2.3246956269239	0.0807257961548135	0.999772751739274	-3.88436132942595
Q9H8M5-1	CNNM2	0.218371821697144	3.35461885356123	2.29193901696849	0.0836840789660936	0.999772751739274	-3.8858741727065
P48735	IDH2	-0.0845954063180018	3.30408266282744	-2.97183999955255	0.0410739390208106	0.999772751739274	-3.89262675693691
Q10471	GALNT2	0.10247526984464	3.29992214642922	2.85574892521929	0.0461318779402053	0.999772751739274	-3.89502693063231
Q16626	MEA1	0.296969776740575	3.27911569075328	2.29800989103528	0.0831267211198918	0.999772751739274	-3.8951979183869
P39687	ANP32A	0.0955475429327887	3.31439889276792	3.00401685299807	0.0397886533313043	0.999772751739274	-3.90917629240797
O43715	TRIAP1	0.517766281286566	3.1681938567278	2.79619002347673	0.0490064888905257	0.999772751739274	-3.91387628929807
Q0PNE2	ELP6	0.218279152502684	3.28095718507985	2.33759526577353	0.0795933051528906	0.999772751739274	-3.91395631459512
O43776	NARS	-0.125871175923799	3.31641426145393	-2.89667373272129	0.044270124031001	0.999772751739274	-3.91428763346391
P17181-1	IFNAR1	0.275841828408612	3.28867860445768	2.28039104161315	0.0847559192624464	0.999772751739274	-3.9148763142543
Q5H9L2	TCEAL5	0.298962481383322	3.29404436817496	2.32711025571031	0.0805124345804914	0.999772751739274	-3.92596509048516
P48552	NRIP1	0.093669967996172	3.30659198110611	2.59161159151377	0.0605862852958367	0.999772751739274	-3.92738629691
P12277	CKB	-0.0766866820819863	3.33280422297379	-3.28215781847802	0.0304429215474791	0.999772751739274	-3.93443176029364
Q8TCX1-2	DYNC2LI1	0.152840957222445	3.28070074442262	2.34373007557104	0.0790610133359855	0.999772751739274	-3.94690282980043
Q9H1X3-3	DNAJC25-GNG10; DNAJC25	0.403152308054737	3.26942771735432	2.4923512805439	0.0673203891363474	0.999772751739274	-3.9544155193896
Q8NHZ8	CDC26	0.253511719470294	3.28027419305857	2.26064851143555	0.0866242593071317	0.999772751739274	-3.97521499378934
O00592	PODXL	0.170132950623672	3.30492143709236	2.2305298975233	0.0895641933424572	0.999772751739274	-3.97950588854856
P46020-2	PHKA1	0.096516436868807	3.31685298392893	2.63959695992855	0.0576099112995392	0.999772751739274	-3.98552354507762
O43852-3	CALU	0.165179242198909	3.31765645298343	2.44100149638486	0.0711372105722125	0.999772751739274	-3.99048145557396
Q8IV36	HID1	0.127999573718994	3.28273941694552	2.29769064732229	0.083155926161779	0.999772751739274	-3.99341412818189
P37108	SRP14	0.101885244906737	3.33957549783103	2.69928719333767	0.0541394248575002	0.999772751739274	-4.00933361964569
P54727	RAD23B	0.104225323275108	3.31588008450983	2.65299050406615	0.0568094115123972	0.999772751739274	-4.01114609013274
Q71RG4-1	TMUB2	0.282770226401352	3.30675678690944	2.13435658022485	0.0997243428992538	0.999772751739274	-4.01637095267643
P12956	XRCC6	0.128161196410617	3.33191743776386	3.37119059743793	0.0280166593757119	0.999772751739274	-4.0219629990603
Q7Z6K3	PTAR1	-0.127088840394491	3.29457359592599	-2.27215065653133	0.0855301933812647	0.999772751739274	-4.0241656455962
Q96IW7	SEC22A	0.191323245361594	3.31198104907083	2.13491972020979	0.0996612370867269	0.999772751739274	-4.03068031057354
Q99581	FEV	-0.171795776162805	3.31723771248168	-2.19574573076707	0.093099326499835	0.999772751739274	-4.0454970082078
O75054-2	IGSF3	0.177865318202991	3.32303458078714	2.66675405165077	0.0560001104567462	0.999772751739274	-4.04628445838866
P25490	YY1	-0.145059998194083	3.35648304708052	-2.45708398960642	0.069915916157388	0.999772751739274	-4.04872937351931
P19447	ERCC3	0.102536268164067	3.30168298628929	2.40976732878947	0.0735790303415569	0.999772751739274	-4.05328972860431
O75953-5	DNAJB5	-0.153562790663774	3.35639823664788	-2.18370439280465	0.0943591778738456	0.999772751739274	-4.05531436203413
Q15063-1	POSTN	-0.414001228050611	3.36545696886359	-2.07789684604376	0.106281784773847	0.999772751739274	-4.05898070000509
Q9UKJ5	CHIC2	0.349265361211837	3.29171549571248	2.08073091494873	0.105941490221508	0.999772751739274	-4.05899291947462
Q9HC16	APOBEC3G	0.216705538423924	3.3357381048175	2.05694436270795	0.108835335703727	0.999772751739274	-4.07018171891802
Q9H0S4	DDX47	0.107884592609227	3.2921103084854	2.68895933050291	0.0547222764787407	0.999772751739274	-4.07176576064051
P51854	TKTL1	0.127704271754641	3.26299737495651	2.50728824387569	0.0662543399062721	0.999772751739274	-4.07511249986559
O43924	PDE6D	-0.202623618267251	3.31763673960231	-2.17026503543353	0.0957877878708004	0.999772751739274	-4.07800126339747
P15924-1	DSP	-0.421958223702491	3.34328811000949	-2.06461680968802	0.107892502650777	0.999772751739274	-4.07857511717904
Q9BRJ6	C7orf50	-0.177751476885438	3.32153526234098	-2.23799097336993	0.0888256263553207	0.999772751739274	-4.08088248065173
Q9NTK5-3	OLA1	0.0999143373248324	3.33324458472911	2.49635563964656	0.0670326905510331	0.999772751739274	-4.08339887778689
P07108-5	DBI	0.4576364806515	3.20397498603675	2.46899423025189	0.069026830195806	0.999772751739274	-4.08567068173626
Q8TAD4-1	SLC30A5	0.314289480999002	3.2805137491118	2.04544359818562	0.110265651174873	0.999772751739274	-4.08701144951698
Q5H9E4	SLC25A53	0.571374330504033	3.35818833858234	2.15750530089596	0.0971664685449476	0.999772751739274	-4.09283155567232
Q6UXN9	WDR82	-0.0695114401974898	3.30497205532097	-2.70928689303811	0.0535819106373638	0.999772751739274	-4.09974344679943
O95260-2	ATE1	-0.2097631625894	3.318310199618	-2.1001264501125	0.103644662410403	0.999772751739274	-4.10130968884413
Q8NG11-1	TSPAN14	0.231409105009285	3.30435844951874	2.07514721776577	0.106613093610662	0.999772751739274	-4.10923660986855
Q14152	EIF3A	-0.0395577399188558	3.32472207263602	-3.22421899990611	0.0321555324338336	0.999772751739274	-4.11128377669585
P41586-4	ADCYAP1R1	0.234749541323765	3.3135267343614	2.00257054252142	0.115782534835528	0.999772751739274	-4.11602074849785
Q9BXI3	NT5C1A	-0.121361120742071	3.33566258000217	-2.26941920974482	0.0857885930505799	0.999772751739274	-4.11678113137848
Q07954	LRP1	0.0742615628253935	3.31314904061036	2.93801172941524	0.0424778400152059	0.999772751739274	-4.11685601186373
Q9NZC7	WWOX	0.27256076737041	3.28972914767551	2.06998171499428	0.107238581805689	0.999772751739274	-4.11848863129293
Q8ND56	LSM14A	-0.114784686264237	3.32495924014033	-2.37095986083094	0.0767464275244168	0.999772751739274	-4.12539703691004
P35232	PHB	0.135325371818672	3.33120608390804	2.83959347426605	0.0468917923096517	0.999772751739274	-4.13093641332052
Q9Y2H9	MAST1	0.121419901820702	3.32082052622431	2.28551236366487	0.084278684315202	0.999772751739274	-4.14229559913707
P46527	CDKN1B	0.231024684440478	3.32622126638345	1.96950760461393	0.120243616078133	0.999772751739274	-4.14519722283497
O95297-1	MPZL1	0.156805578532937	3.29533760783373	2.0603490163893	0.108415837229661	0.999772751739274	-4.14603986724471
P28161	GSTM2	-0.333367958078642	3.30427711148984	-2.2623189863108	0.0864643959144291	0.999772751739274	-4.1498074621859
Q6P4I2	WDR73	-0.150572190828955	3.32616073506456	-2.13893158446036	0.0992129455070166	0.999772751739274	-4.15254913789924
Q86YV9	HPS6	0.143199844582502	3.29500569683874	2.24970199979979	0.0876800739401291	0.999772751739274	-4.15772124668412
Q64LD2-1	WDR25	-0.365230767544693	3.29100464755827	-1.94312764456422	0.123937591881375	0.999772751739274	-4.15853732669791
O00291	HIP1	0.119747581554463	3.2824233894877	2.54409855807644	0.0637085083704295	0.999772751739274	-4.16093400219176
O43765	SGTA	-0.129242523647893	3.32750357712308	-2.49587537848846	0.0670671214317711	0.999772751739274	-4.16429893975732
Q93074-2	MED12	0.0670521702116745	3.30836476414322	2.62627583164431	0.0584189833242012	0.999772751739274	-4.16835458276986
Q16827-1	PTPRO	0.185558505991368	3.34379875158805	1.98744408000352	0.117800637842328	0.999772751739274	-4.17212361327569
Q6IN85	SMEK1; PPP4R3A	0.0757176283805539	3.29358686617444	2.6108019572258	0.0593752560335066	0.999772751739274	-4.1729762563266
Q5T200-1	ZC3H13	0.083942845150345	3.32291960685492	2.56115011577119	0.0625672579244116	0.999772751739274	-4.173636195718
Q9UBG0	MRC2	0.109947224402151	3.31408697577267	2.15807867187378	0.0971040446475754	0.999772751739274	-4.17462936946691
Q96K58-2	ZNF668	-0.14670302294076	3.35125205742561	-2.0676599420529	0.107521041622468	0.999772751739274	-4.17483592224194
P58546	LUZP6; MTPN	0.52694962191331	3.2440918552712	2.53481739223006	0.0643396947076365	0.999772751739274	-4.17992372313835
O60551	NMT2	0.215172874803535	3.33452192918614	1.98385582201732	0.11828499210675	0.999772751739274	-4.18777179486012
O75323-1	GBAS; NIPSNAP2	-0.20327906011146	3.31833604770202	-2.34615395135743	0.0788518122890364	0.999772751739274	-4.18803640207119
Q9H0C5	BTBD1	-0.148735472477871	3.32203172296606	-2.00868165692959	0.114977978383521	0.999772751739274	-4.18997729447837
Q9NXC2-1	GFOD1	-0.203565369128075	3.33718477217211	-1.89912197888689	0.130377175975267	0.999772751739274	-4.19530387484443
Q9H9G7	AGO3; EIF2C3	-0.109396746376662	3.34697520268089	-2.14232830101651	0.0988351409739714	0.999772751739274	-4.20096471090192
O75955	FLOT1	0.104314759544397	3.30597260495622	2.52914089317996	0.0647292617702546	0.999772751739274	-4.20447796007742
Q92643	PIGK	0.142918690730654	3.33165491112933	2.16453216311348	0.096404509685939	0.999772751739274	-4.2047144441219
Q9UBQ5	EIF3K	-0.103972786045177	3.31668904882408	-2.34613780853652	0.0788532034822326	0.999772751739274	-4.20718996640921
Q96DZ5	CLIP3	0.245033267297754	3.30317184068556	1.86447662687431	0.135701859727743	0.999772751739274	-4.21316337214815
P29992	GNA11	0.255112395261472	3.31588104040324	2.0864880329811	0.10525391466597	0.999772751739274	-4.22455482557701
P48729-2	CSNK1A1	-0.171733563422462	3.42349623405135	-2.35424236724825	0.078158224174883	0.999772751739274	-4.22675985772429
Q05481-1	ZNF91	0.236588624355063	3.28581029676381	1.86856661565532	0.135061219003025	0.999772751739274	-4.22792610638256
Q68CQ7-1	GLT8D1	0.121126851045668	3.33838448181558	2.05678897290539	0.10885452440253	0.999772751739274	-4.2313332342178
Q9BXJ8-1	TMEM120A	0.202080427169525	3.31073999788628	1.93862305003912	0.124580630029198	0.999772751739274	-4.23435676433727
Q16849-1	PTPRN	0.275620786874683	3.24958557932346	1.82663811946151	0.141786201376639	0.999772751739274	-4.23948252292693
Q8TDY4-1	ASAP3	-0.176639799316346	3.30737757857176	-1.92148044792122	0.127061122189718	0.999772751739274	-4.24295070855632
Q92630-1	DYRK2	-0.274945112842469	3.3447313773716	-1.84534457046858	0.138742396682614	0.999772751739274	-4.24749068622486
P11274-1	BCR	0.0830041887055687	3.3280886061491	2.37676098792695	0.0762632793262012	0.999772751739274	-4.24834347250821
P84074	HPCA	0.232998174881111	3.27369997474108	1.81093061382946	0.144397356811179	0.999772751739274	-4.25498903391116
Q96NC0	ZMAT2	-0.0896551573669466	3.33117448651133	-2.42689414174208	0.0722285120960807	0.999772751739274	-4.25537038620977
Q15223	PVRL1; NECTIN1	0.107998720914711	3.33213788359917	2.17091147526064	0.0957185221466026	0.999772751739274	-4.25688193965575
O76080	ZFAND5	-0.0883285393817966	3.32885446078332	-2.23658876565262	0.0889639081025428	0.999772751739274	-4.26387131395808
Q99674-5	CGREF1	0.206688691690631	3.32328482073506	1.80123764905992	0.146034320739379	0.999772751739274	-4.26776363256779
Q9NYM9	BET1L	0.240514139451246	3.29808718432881	1.86589534916575	0.135479266099575	0.999772751739274	-4.27250840980377
P61158	ACTR3	-0.101249335679943	3.30949663940415	-2.3229216684373	0.0808829530130849	0.999772751739274	-4.27525145939725
Q86V81	ALYREF	-0.0860825895312139	3.31538606525482	-2.54278435851334	0.0637974514445742	0.999772751739274	-4.27669300047948
O00408-1	PDE2A	0.147844993667513	3.31688129917777	2.10270713974252	0.103343227557095	0.999772751739274	-4.28049962805846
Q96BZ9-3	TBC1D20	0.205542119016587	3.32333997662274	1.78155364540212	0.149419898267573	0.999772751739274	-4.28802013064863
Q9H160	ING2	-0.20083469299446	3.34525275808369	-1.79070823725097	0.147835039711287	0.999772751739274	-4.28906640943303
Q9Y2Y0	ARL2BP	-0.255842306159566	3.29861037397891	-1.93880825712015	0.124554120018265	0.999772751739274	-4.29062088519154
P37235	HPCAL1	0.106964801354498	3.28109662698485	2.07517320224472	0.106609957354068	0.999772751739274	-4.29520147107357
Q6P995-1	FAM171B	0.211121845628212	3.33969999926884	1.7503014380035	0.154968023237329	0.999772751739274	-4.2967552228522
Q13595-1	TRA2A	0.180700626635226	3.31550470557236	2.09089972265202	0.104730359763949	0.999772751739274	-4.30221847131145
O43414-1	ERI3	-0.124748979357752	3.27820575990524	-2.12331692212783	0.100970449019322	0.999772751739274	-4.30496689835026
Q99943	AGPAT1	0.18175243489919	3.33061783504613	1.78975687574999	0.147998903197809	0.999772751739274	-4.30540117429429
Q13492-1	PICALM	0.0962254423404475	3.29497472552022	2.26299226341657	0.0864000573309169	0.999772751739274	-4.30653047203836
Q8N0W4-2	NLGN4X	0.248153133390906	3.33505394086001	1.77528044317784	0.150516375208066	0.999772751739274	-4.308566022951
Q9P2Y4	ZNF219	-0.156015178814627	3.35422259527885	-2.0033052981458	0.115685475509955	0.999772751739274	-4.30908001705187
Q8WXE1	ATRIP	-0.127660867178014	3.30901291317296	-2.1768519586587	0.0950846067619769	0.999772751739274	-4.30941008343939
Q07666	KHDRBS1	0.158406029415255	3.34183248989431	2.42870655717476	0.0720872499236019	0.999772751739274	-4.31240909014632
P49327	FASN	0.0356889231961703	3.31696470838643	3.59468760536063	0.0228695193392908	0.999772751739274	-4.31379475901442
Q9UI30	TRMT112	-0.129815909633697	3.30763415966816	-1.97563838369515	0.119402425692437	0.999772751739274	-4.31654166325451
Q9Y343	SNX24	-0.173677975692215	3.308020352782	-1.86699756442063	0.135306603161728	0.999772751739274	-4.31770841001883
P56962	STX17	0.154980184847987	3.31899864618304	1.79182512212825	0.147642913300933	0.999772751739274	-4.31831454086598
P13056-1	NR2C1	-0.108943361098216	3.3506679956401	-2.06928627944192	0.107323100445826	0.999772751739274	-4.32563588222991
Q92466	DDB2	-0.139536200555769	3.32902248620069	-1.91858554097361	0.127485275180193	0.999772751739274	-4.32942438408599
Q9NRB3	CHST12	0.130103303386689	3.31028183740564	1.90902937899886	0.12889635065362	0.999772751739274	-4.33368597925303
Q9P2W9	STX18	0.162071610505619	3.29267354382928	2.01803287901137	0.113758682638022	0.999772751739274	-4.33521436852483
O15530-1	PDPK1	-0.127283409041688	3.31323894468758	-2.17204234127712	0.0955974844459214	0.999772751739274	-4.33542051744447
P07919	UQCRH	0.203141748855117	3.31234896679087	1.73981223906394	0.156878840480225	0.999772751739274	-4.33734993715682
Q9UJJ9	GNPTG	-0.26564748882611	3.33280488131615	-1.68231887090493	0.167804131316325	0.999772751739274	-4.34130396427678
Q4V328	GRIPAP1	0.0835962914249648	3.30479267099065	2.18374889125812	0.0943544872716078	0.999772751739274	-4.34476775188673
O43325	LYRM1	-0.311394862563878	3.3302325759697	-1.69755129555502	0.164833648205565	0.999772751739274	-4.34547151762597
Q9UHA4	LAMTOR3	-0.118424035057036	3.35811663943775	-1.94479059538964	0.123701116123275	0.999772751739274	-4.34622447576088
Q9UIJ7-1	AK3	-0.129658353915009	3.32614382725037	-2.2976843832842	0.0831564993237586	0.999772751739274	-4.34973359587003
P21579	SYT1	0.120062734822188	3.29080722870872	1.92163619458066	0.127038346104543	0.999772751739274	-4.35165411602139
P23528	CFL1	0.1367908364814	3.37059035087493	2.75819365767031	0.0509489812570306	0.999772751739274	-4.35273270401196
Q15631-1	TSN	-0.0745364504265296	3.32257370721911	-2.27398372907997	0.0853572715534661	0.999772751739274	-4.35315926972515
Q8WTP8-2	AEN	-0.111744471922711	3.34604081996138	-1.9369581581392	0.124819213502511	0.999772751739274	-4.35353118463592
Q8N8A6	DDX51	0.0931063212753024	3.31330390718282	2.16037200175206	0.0968548113830917	0.999772751739274	-4.35900675919851
Q8IWB7	WDFY1	0.130021816271957	3.29840453712959	2.20321840232587	0.0923269233560141	0.999772751739274	-4.35947852626074
Q9BQ90	KLHDC3	-0.15122092191679	3.32674597677639	-1.97433789002713	0.119580325267615	0.999772751739274	-4.35987622032445
O75078-1	ADAM11	0.193693488435007	3.30179725534384	1.66816365907509	0.170614948233392	0.999772751739274	-4.36448789608931
Q9UHH9	IP6K2	-0.119175068546803	3.32062071251018	-1.87049241713193	0.134760698206128	0.999772751739274	-4.36527736753291
Q96K80	ZC3H10	0.124176822037206	3.32025644532857	1.88677068581422	0.132249114028886	0.999772751739274	-4.36694365221395
Q8WU10	PYROXD1	0.0998313162823043	3.30415346681235	2.04479628512348	0.110346768217655	0.999772751739274	-4.36710330612951
Q96QE2	SLC2A13	0.154019740991635	3.31978623551398	1.83046912466414	0.141157055677227	0.999772751739274	-4.37045503959123
Q15011-1	HERPUD1	0.192014032616557	3.34744865973974	1.67365809431709	0.169518094272985	0.999772751739274	-4.3706571760332
P10909-2	CLU	0.166078508581963	3.30317343339998	1.68366467463947	0.167539434300664	0.999772751739274	-4.37263712052719
Q9BZG1	RAB34	0.243280473155406	3.26604953073737	1.64729686283892	0.174848722142776	0.999772751739274	-4.37581063467023
Q8TAB3	PCDH19	0.142429721202118	3.31860708419334	1.8981740421852	0.130519823241153	0.999772751739274	-4.37670927624331
Q7LG56-6	RRM2B	0.125900020437608	3.30676839526878	1.91618717830215	0.127837839378968	0.999772751739274	-4.37750633086098
O75925-2	PIAS1	0.0921574310094279	3.30538166623426	2.03220112584099	0.111938242027532	0.999772751739274	-4.38279536434249
Q9NX04	C1orf109	-0.255267416199145	3.29344549763837	-1.60194903815774	0.184431557418765	0.999772751739274	-4.38510697097103
P28749-1	RBL1	0.125847113579034	3.32261573100321	1.90144625487152	0.130028128143571	0.999772751739274	-4.38817221733225
Q3B820-3	FAM161A	0.200532640281497	3.2778128863976	1.70735829929884	0.162950494441927	0.999772751739274	-4.39033083076373
Q9NQ89	C12orf4	0.124521121319978	3.31272746461875	1.93317630655791	0.125363010420362	0.999772751739274	-4.39128807521617
Q9C0F3	ZNF436	-0.396526697071244	3.37104172528792	-1.60124470405247	0.184584624828485	0.999772751739274	-4.3919240566745
Q14254	FLOT2	0.0794851064923801	3.29914467953933	2.15063513149676	0.0979179160766554	0.999772751739274	-4.39195310765797
Q8TCD1	C18orf32	0.196692210514417	3.31676969202631	1.63895793849919	0.176571209370476	0.999772751739274	-4.39283536328036
Q9NR48	ASH1L	0.108180302799714	3.31569465986036	2.2515337700377	0.0875023949468322	0.999772751739274	-4.39545901332273
Q96RT8	TUBGCP5	-0.0855243709661	3.31635661671276	-2.23798329963143	0.0888263824624013	0.999772751739274	-4.39634939454686
Q7LBR1	CHMP1B	0.156690712380932	3.29641505944948	1.96762523519996	0.120503187740985	0.999772751739274	-4.40018335536039
O60344-4	EEF1AKMT4; ECE2; EEF1AKMT4-ECE2	-0.215057359133821	3.29294069749904	-1.90360325581509	0.129705105642525	0.999772751739274	-4.40100753991863
Q9NZ09-1	UBAP1	0.132832997544753	3.28256461682175	1.91206404412379	0.128446422085802	0.999772751739274	-4.4031051995506
Q9H4L5	OSBPL3	0.0997224644938629	3.31998103590666	2.42895490744188	0.0720679176161342	0.999772751739274	-4.40314159006318
Q9UKA1	FBXL5	0.245364063137229	3.23276462761936	1.56866244577309	0.191810934944998	0.999772751739274	-4.4049452217078
Q8TDD1-2	DDX54	0.0630828065056071	3.30808549191059	2.36488750791601	0.077255877750422	0.999772751739274	-4.40612724568908
P52799	EFNB2	0.251974649034665	3.31116419769892	1.57069991613295	0.191350610380103	0.999772751739274	-4.41586669303642
Q9BTK6	PAGR1	0.194656822169653	3.27111536966921	1.58548034849962	0.188045179167939	0.999772751739274	-4.4163008088326
O60245-2	PCDH7	0.118582252310486	3.32280260778191	1.80402812098399	0.145561037116475	0.999772751739274	-4.41679579523397
P36941-1	LTBR	0.375326384826109	3.267658554761	1.56232856903005	0.193249235779861	0.999772751739274	-4.41764950008796
Q8NFH4	NUP37	-0.0852865952150997	3.32210949073411	-2.08838194469168	0.105028802324216	0.999772751739274	-4.42056265363232
Q15544	TAF11	-0.122280754864643	3.33567220839768	-1.86581919891066	0.135491203866993	0.999772751739274	-4.42127876156787
Q9NV79	PCMTD2	-0.164749206089213	3.32165932696471	-1.79149219994855	0.147700154648754	0.999772751739274	-4.42446960483477
Q9H0D6-1	XRN2	0.0684443819075384	3.30690168658007	2.65983364979261	0.0564053604095079	0.999772751739274	-4.42545664705992
O95782	AP2A1	0.112581337092865	3.28339337372666	2.32207890023232	0.0809577355699245	0.999772751739274	-4.42621260694422
P13498	CYBA	-0.39234546286963	3.38609756873339	-1.53697347756334	0.199118699636243	0.999772751739274	-4.43089586155653
Q8TBP0	TBC1D16	0.179822506396431	3.30486105911991	1.69746517865072	0.16485028561093	0.999772751739274	-4.4356681521438
Q96T88-2	UHRF1	-0.0527623829129554	3.32444474897378	-2.5139452174027	0.0657854497808711	0.999772751739274	-4.43762438483595
Q8NG08	HELB	0.0904473479027805	3.2988717233529	2.07576024827794	0.106539129601214	0.999772751739274	-4.4401726725247
Q5JTJ3-2	COA6	0.181498262824182	3.30108937841192	1.95646394869392	0.122054895489977	0.999772751739274	-4.44120168729191
O95302	FKBP9	0.163054239270848	3.32670668702947	2.10661524087886	0.1028885906133	0.999772751739274	-4.44273121082036
A2RUS2	DENND3	-0.413315271021263	3.37158617780331	-1.56737648251266	0.19210205859013	0.999772751739274	-4.44290824288373
Q9Y3C5	RNF11	0.220086790498211	3.26324864122536	1.52616234087423	0.201676602018444	0.999772751739274	-4.44543766191264
P55040	GEM	0.139375993635144	3.27529968879435	1.78940585576608	0.148059412170077	0.999772751739274	-4.44608946918379
Q9NSY1	BMP2K	0.113775759197705	3.31119525963427	1.85916755955046	0.136538340257961	0.999772751739274	-4.44641087613402
P51665	PSMD7	-0.0908942927535964	3.28901062595547	-2.2895374494493	0.0839057225278846	0.999772751739274	-4.4528521736126
O15145	ARPC3	-0.0960706554097341	3.32729423107991	-2.12075011695705	0.101262645723612	0.999772751739274	-4.45324388589507
O75629	CREG1	-0.154524665106411	3.34178452865479	-1.64682360011213	0.174946008446691	0.999772751739274	-4.4533290777074
Q9ULF5	SLC39A10	0.26396194257897	3.31691065881457	1.83143645281068	0.140998670446736	0.999772751739274	-4.4533700399145
Q99717	SMAD5	0.112578211415967	3.30072556293606	1.79949023757917	0.146331531061404	0.999772751739274	-4.454436182686
Q92613	PHF16; JADE3	0.101919871322708	3.30588930436216	2.08005211153445	0.106022886368046	0.999772751739274	-4.45453043136255
P55081	MFAP1	-0.11567591881247	3.33387663364802	-2.12926432323339	0.100297001628521	0.999772751739274	-4.45686305116069
Q9BVJ6-1	UTP14A	-0.0731162969452957	3.34771262543467	-2.31270665132612	0.0817946496501273	0.999772751739274	-4.45936922535047
P62330	ARF6	0.131265005519288	3.30046933616598	1.71981797886411	0.16059062203191	0.999772751739274	-4.45962110967878
Q8N653	LZTR1	0.125142509352799	3.28796355088451	1.75988144826026	0.15324439670427	0.999772751739274	-4.4597012842023
O00115	DNASE2	0.161760814091738	3.27976935306908	1.62890351371096	0.17867159417937	0.999772751739274	-4.46086526805929
Q9NWQ8	PAG1	0.135397109715637	3.34041858356045	1.7644492962287	0.152429732935432	0.999772751739274	-4.4647567488618
Q9H871-1	RMND5A	0.125085173947829	3.31382107522284	1.91731601773676	0.12767176613215	0.999772751739274	-4.46815766450982
P51957	NEK4	0.138248946006209	3.31294212790876	1.76600624621688	0.152153107855811	0.999772751739274	-4.46989952627093
P07195	LDHB	0.148474584593121	3.32171555048413	3.06542835867574	0.0374639662186714	0.999772751739274	-4.47462606138012
P60510	PPP4C	-0.122528452069374	3.29461061960333	-1.99333050381231	0.117010759923371	0.999772751739274	-4.47670857017267
Q9NWB7	IFT57	0.135702597605188	3.2910888230396	1.79495960603327	0.147105141668707	0.999772751739274	-4.47763530584112
Q9H267	VPS33B	0.100876468733984	3.31003445897831	2.16538581959655	0.0963123970113873	0.999772751739274	-4.47867602365506
Q96GL9	FAM163A	0.334537709579495	3.27433708818863	1.43046614634512	0.225824459103769	0.999772751739274	-4.48109852862725
Q99959-2	PKP2	0.144421921730785	3.33539075473326	1.9261847342942	0.12637512700972	0.999772751739274	-4.48829152973465
Q6ZN54	DEF8	0.13270706062004	3.29874919254659	1.79856956479249	0.146488384531198	0.999772751739274	-4.4902742555482
Q9UJX4	ANAPC5	0.102194522706882	3.31337640548023	2.284126349595	0.0844075425248805	0.999772751739274	-4.49086736926386
Q96I34	PPP1R16A	0.196031420898012	3.34166385529271	1.49236305283758	0.209891650131505	0.999772751739274	-4.49224345208382
Q96CX2	KCTD12	-0.0992476239440132	3.33039922862405	-1.94553147438773	0.123595919394653	0.999772751739274	-4.49337985155643
Q8IY45	AMN1	0.115701725651353	3.32066212808431	1.77770233403985	0.150092046884118	0.999772751739274	-4.49439808079711
Q01658	DR1	0.172443428141332	3.26991186724484	1.5705951751012	0.191374246707329	0.999772751739274	-4.49545970743225
Q9UKL6	PCTP	0.137451132733146	3.29234578961346	1.82750929421565	0.141642869253902	0.999772751739274	-4.49846674888509
Q9BRG1	VPS25	-0.244735255534311	3.30440174686177	-1.99171441184733	0.117227039017126	0.999772751739274	-4.5007906941734
Q96C00	ZBTB9	0.205542003205653	3.33229935953885	1.79617483324408	0.146897212517028	0.999772751739274	-4.50161063497035
Q3KRA6	C2orf76	-0.194820151202993	3.30538296939624	-1.4203661356874	0.228537227156095	0.999772751739274	-4.50175340906027
P35227	PCGF2	0.0859923633467229	3.3221455262913	2.05304554158284	0.109317919165953	0.999772751739274	-4.50572057660955
Q3ZAQ7	VMA21	0.2689440279196	3.32887874799751	1.46072618278535	0.217888518766329	0.999772751739274	-4.50658264714025
Q9NQS1	AVEN	0.0985511587301636	3.30710662477469	1.90148501264344	0.130022316280965	0.999772751739274	-4.5076695385859
O95619	YEATS4	0.0753535743905461	3.3236522369877	2.1180550191615	0.101570455723138	0.999772751739274	-4.50770984230155
Q96C11-3	FGGY	0.376732753388136	3.3303260222212	1.36548720102156	0.243853804617383	0.999772751739274	-4.50792778467349
Q08431	MFGE8	-0.243614510912087	3.35602611099714	-1.61634569919556	0.181331505520419	0.999772751739274	-4.50872259840491
Q8TEK3	DOT1L	0.0915773661781448	3.33210585896564	1.87755597950397	0.133664589946063	0.999772751739274	-4.51139574615009
O43556-4	SGCE	0.251076305265002	3.27170595754771	1.36282642463198	0.24462169824784	0.999772751739274	-4.51394134450998
P42702-1	LIFR	0.232466169740688	3.32161309391317	1.46709664013612	0.216253878991548	0.999772751739274	-4.51719766373439
P32314	FOXN2	0.202697044089072	3.29644622897472	1.39458077188969	0.235611199519374	0.999772751739274	-4.51769003344735
P51693-2	APLP1	0.149703420479193	3.30925920159266	1.49561637541564	0.209086334013258	0.999772751739274	-4.5180212882603
Q9Y265	RUVBL1	-0.0710295557457914	3.33839733514766	-2.56451418768487	0.0623448775957724	0.999772751739274	-4.51878886251841
Q8N697	SLC15A4	0.227137765929093	3.3204608848073	1.54166671251313	0.198018637365082	0.999772751739274	-4.5202042385842
Q07820	MCL1	0.119524656608763	3.3054067268416	1.67001349820576	0.170244836868081	0.999772751739274	-4.52035886998745
Q14012	CAMK1	0.128943654322444	3.31911319662965	1.76800598739587	0.151798594377197	0.999772751739274	-4.52063035345785
P31249	HOXD3	0.353523638157076	3.23208587799602	1.35053945328944	0.248198656150113	0.999772751739274	-4.52116503264822
P42785-1	PRCP	-0.332440340721851	3.33654990458063	-1.83094108633755	0.141079755319776	0.999772751739274	-4.52555918637966
Q16585	SGCB	0.261737519007447	3.33622229177671	1.37817370781251	0.240225068828779	0.999772751739274	-4.52595156701455
P19623	SRM	-0.0611854791143343	3.31882174694114	-2.25617684591032	0.087053829018401	0.999772751739274	-4.53062637763184
A7XYQ1	SOBP	0.220932667714282	3.34724606810099	1.40371575774371	0.233080525418561	0.999772751739274	-4.53166862236798
P13521	SCG2	0.1270093201784	3.30177832726184	1.65641118216931	0.172986116457136	0.999772751739274	-4.53278217835171
Q9GZU3	TMEM39B	0.306959588291831	3.28736217026837	1.29115870435449	0.26621879913104	0.999772751739274	-4.53763540135843
Q9UM13	ANAPC10	-0.251175410192024	3.32602788186985	-1.7173039820183	0.161063854308331	0.999772751739274	-4.54118800629067
Q9UN36-6	NDRG2	0.108649572359104	3.30316504591485	1.73941450948023	0.156951784384232	0.999772751739274	-4.54207523724019
Q96BQ5	CCDC127	0.188519776808857	3.30651059863367	1.44767915936441	0.221275279039706	0.999772751739274	-4.54340093151653
Q9Y3D0	FAM96B	0.244574059970524	3.286277457441	1.61500750469178	0.18161736836887	0.999772751739274	-4.54695203446001
Q96Q45-3	TMEM237	0.184583616249101	3.36570741027058	1.35791326025397	0.246045886240532	0.999772751739274	-4.54724072402712
Q8TE99-1	ACPL2; PXYLP1	0.105703658091083	3.32317777254835	1.68390522489453	0.167492168303221	0.999772751739274	-4.5520173492219
Q13064	MKRN3	-0.16727963228585	3.32037661595266	-1.39263455028353	0.236153878058268	0.999772751739274	-4.5523299712356
Q96H20-1	SNF8	-0.134371364850209	3.29749966398211	-1.98841124933609	0.117670457559684	0.999772751739274	-4.55405331639969
Q6PI98-1	INO80C	-0.162210189125955	3.33775360476917	-1.6710377249027	0.170040273946982	0.999772751739274	-4.55514820458024
O76083-1	PDE9A	0.164769893487932	3.3463692816404	1.41961519213377	0.228740218909902	0.999772751739274	-4.55689193920437
Q9UJ68-1	MSRA	-0.111220337131738	3.3346230085527	-1.69653289452842	0.165030511941098	0.999772751739274	-4.56165672732104
A6NDB9	PALM3	0.101392981799773	3.3465813320122	2.07383767781727	0.1067712834654	0.999772751739274	-4.56294616903351
P11217	PYGM	0.143749329402173	3.28582142068565	1.65273690221916	0.173734487536487	0.999772751739274	-4.565968973027
Q7Z2W4	ZC3HAV1	-0.134331709497841	3.31795515164267	-2.19606727523373	0.0930659423769094	0.999772751739274	-4.56875258693267
Q05655	PRKCD	0.0945954153539164	3.28368847242775	1.96363807453072	0.121055022985812	0.999772751739274	-4.56914572809651
Q9UN70-1	PCDHGC3	0.178118201370076	3.32856119037453	1.3474002290207	0.249120749802769	0.999772751739274	-4.57015064776028
Q9NVH6-8	TMLHE	-0.139217856751184	3.31670455914122	-1.46308711320218	0.217281263805452	0.999772751739274	-4.57201006456917
Q9Y5G0-1	PCDHGB5	0.211229490386124	3.29101589756795	1.46074264114026	0.217884279600034	0.999772751739274	-4.57358992325581
O00422	SAP18	-0.0737401284384415	3.33662586432827	-2.12811839841178	0.100426370809697	0.999772751739274	-4.57392536431307
Q9H2B2	SYT4	0.173194821562387	3.31535094439006	1.4448398655789	0.222019288432644	0.999772751739274	-4.57403135316835
P24864-1	CCNE1	-0.21164094395276	3.35286615739568	-1.32433155923112	0.256000428659557	0.999772751739274	-4.5750662892354
O94880	PHF14	0.121233859100026	3.29685724853758	1.75405978561742	0.154289384381848	0.999772751739274	-4.57523245784644
Q8N7R7-1	CCNYL1	0.195240119860708	3.3370988266703	1.37201013087089	0.241981338973258	0.999772751739274	-4.57977041597101
Q9NYU1	UGGT2	0.10414028831621	3.31944059913098	2.01338506429638	0.114362924807231	0.999772751739274	-4.58083367840121
P17098	ZNF8	0.0890700872125346	3.3286023930211	1.9874189952913	0.117804016320433	0.999772751739274	-4.58232390054597
Q8NBA8	DTWD2	-0.254627833130938	3.36457595525191	-1.38905489649083	0.237155256304626	0.999772751739274	-4.58531209856342
Q86V88	MDP1	-0.237329688085104	3.327010842083	-1.6344293111227	0.177514045644044	0.999772751739274	-4.58611773913133
Q7L099-3	RUFY3	-0.161054697868524	3.3204500430246	-1.72117570276914	0.160335656210657	0.999772751739274	-4.58645509392121
O95466-2	FMNL1	-0.226375358341094	3.29020620059251	-1.20175053934061	0.295748770532562	0.999772751739274	-4.58744540664591
Q9H074	PAIP1	0.0784013325506201	3.30884898878526	1.95307346685021	0.122530562238623	0.999772751739274	-4.58855865219769
P47914	RPL29	0.445219890858945	3.36573322371448	1.97126789973077	0.120001429933891	0.999772751739274	-4.59222497566743
P17152	TMEM11	-0.231238216042549	3.34142159908026	-1.54740403035629	0.196682299967103	0.999772751739274	-4.59310391364562
Q8WUK0	PTPMT1	-0.134559477830351	3.28836531843187	-1.42704242397557	0.226740413637063	0.999772751739274	-4.59671764159605
O75052-3	NOS1AP	0.180404767791067	3.2561049702335	1.81501327964446	0.143713754058916	0.999772751739274	-4.59713110188751
P42566-1	EPS15	0.132477528999161	3.28370334676967	2.21097182591396	0.0915330553272088	0.999772751739274	-4.59804138961832
Q05BQ5	MBTD1	0.116705271756022	3.3068238211194	1.75359698283602	0.154372781411712	0.999772751739274	-4.59932822072459
P84101-1	SERF2	0.256009371995896	3.29307522602982	1.46678455210863	0.216333671058409	0.999772751739274	-4.60049492737327
O43426	SYNJ1	0.109914687824923	3.30860313025512	1.60386645871534	0.184015525174522	0.999772751739274	-4.60278883055422
Q9NWA0	MED9	0.690734541503956	3.20182694699062	1.55528157726037	0.194862509104328	0.999772751739274	-4.60283192058715
Q09161	NCBP1	0.0635390249645887	3.29805453093438	2.27662675880207	0.0851086336430849	0.999772751739274	-4.60466721597776
Q9BQ65	USB1	0.183778759296769	3.26818676861766	1.26391690590184	0.274903981432478	0.999772751739274	-4.60501860255183
Q7L622	G2E3	0.146289991982712	3.30510105219104	1.37090590286267	0.242297317532061	0.999772751739274	-4.60522670147883
Q9UMS6-2	SYNPO2	0.128431462686516	3.32855157320242	1.44287738347648	0.222535005049149	0.999772751739274	-4.60641986931549
P30304	CDC25A	0.150046023481065	3.26013545366344	1.36680070274478	0.243475607132088	0.999772751739274	-4.6084383750561
Q8N3D4	EHBP1L1	-0.232430324905696	3.2957859956671	-1.13765054412445	0.318792230743237	0.999772751739274	-4.61047581773511
Q8IUG5-1	MYO18B	-0.446075464769706	3.30592662279709	-0.86678622609939	0.434963808118475	0.999772751739274	-4.6117750687026
Q96EY5-1	FAM125A; MVB12A	-0.13563941258221	3.3144588206625	-1.63904036559908	0.176554096920072	0.999772751739274	-4.61216450909152
P23381	WARS	-0.0698657318589558	3.30494820190754	-2.21776783258709	0.0908434845626141	0.999772751739274	-4.61224137943156
Q9UQF2	MAPK8IP1	-0.103973042424661	3.33842354419538	-1.72955145422828	0.158772209059374	0.999772751739274	-4.61316999053999
O15304	SIVA1	-0.166326685669372	3.36812703257537	-1.29489707940451	0.265047777128893	0.999772751739274	-4.61430379135379
P09488	GSTM1	-0.119888516944656	3.2528369032844	-1.7572406704108	0.153717481577825	0.999772751739274	-4.61478563054946
Q6NYC1-3	JMJD6	-0.11957157242018	3.32067058337183	-2.02890712476699	0.112358607915205	0.999772751739274	-4.61561198216369
Q8NFV4	ABHD11	-0.145285048061584	3.28882732078582	-1.56654400363481	0.192290762313585	0.999772751739274	-4.61611466580198
Q9NVV4	MTPAP	0.110075686405132	3.28984577028319	2.00177220175341	0.115888094690142	0.999772751739274	-4.61720034457401
Q4KMP7	TBC1D10B	-0.0994144457585124	3.31446034092497	-1.66063741874098	0.172129489486567	0.999772751739274	-4.61781285388454
P21127-3	CDC2L2; CDK11B	0.171363692900216	3.29883121616949	1.5230785161856	0.202412366441173	0.999772751739274	-4.61852275611353
Q9Y620-1	RAD54B	0.0939492339184331	3.30552311151986	2.02566812358798	0.112773645926366	0.999772751739274	-4.61910513403665
Q5MNZ9	WIPI1	0.143626707697246	3.28860265708742	1.39078825268375	0.236669839838512	0.999772751739274	-4.62075116887216
C9JH25-1	PRRT4	0.272410737608362	3.29949218385358	1.56687089838809	0.192216640092508	0.999772751739274	-4.62233663993846
P23435	CBLN1	-0.103486937109287	3.32551693303583	-1.59745986828383	0.185409408842606	0.999772751739274	-4.62408064508513
Q8TEL6-3	TRPC4AP	-0.148623110656356	3.28469381756251	-1.55568551425801	0.194769662771334	0.999772751739274	-4.6241113432494
Q9Y3B7-1	MRPL11	0.0855663909583485	3.29526997569367	2.04286372250256	0.110589335088617	0.999772751739274	-4.62521176416584
P17612	PRKACA	0.11226995894236	3.32823305045821	1.7224107925121	0.160104091111224	0.999772751739274	-4.62583761950628
Q96M11	HYLS1	-0.336372899372817	3.26629111527404	-0.804990053338073	0.465954064902069	0.999772751739274	-4.62595835868341
Q99640	PKMYT1	0.139819188779221	3.34109269648966	1.6229929757466	0.17991843563527	0.999772751739274	-4.62613935051847
P35606	COPB2	0.0472884202726873	3.31002847547705	2.47852386479056	0.0683247201583246	0.999772751739274	-4.62740081381967
Q9BTT0	ANP32E	0.0639468459258041	3.32567878616325	2.3012777247826	0.0828284360763183	0.999772751739274	-4.63384627958498
Q9UKG9-3	CROT	-0.126262564806534	3.31880577332842	-1.40636140261775	0.232352657852846	0.999772751739274	-4.63451207753311
Q6V1X1	DPP8	0.120139530222108	3.30057969418548	1.65670547290357	0.172926321744693	0.999772751739274	-4.63456182650998
O43298	ZBTB43	-0.134197593970907	3.33788790177577	-1.45512560116701	0.219335889372685	0.999772751739274	-4.63459374136139
Q9UJU2-1	LEF1	0.203576662480288	3.33361370920159	1.17244683035467	0.306083716576864	0.999772751739274	-4.63475862673641
P08235	NR3C2	0.305023329901243	3.39584057568831	0.802706795462892	0.467131735184158	0.999772751739274	-4.63521640413814
O95057	DIRAS1	0.206666749215806	3.27865918857164	1.08732215337005	0.338032554274199	0.999772751739274	-4.63649903243773
Q6DD88	ATL3	0.148927140498112	3.34042792567218	2.00898239018984	0.114938543897923	0.999772751739274	-4.63777623962371
Q96CW1	AP2M1	0.188502475890899	3.27508497334638	2.07306011984179	0.106865333453372	0.999772751739274	-4.6382962856489
Q8TAM2-4	TTC8	0.170607491572701	3.2591392054299	1.39257675376785	0.236170012805597	0.999772751739274	-4.63888834567715
Q6ZMI0-1	PPP1R21	0.0758042533124604	3.29945601561583	1.92387207521544	0.126711863197498	0.999772751739274	-4.63978498754472
Q8NFZ8	CADM4	0.136945442511347	3.3457424090368	1.53683892272266	0.199150330444453	0.999772751739274	-4.64165399132791
P98155-1	VLDLR	0.196856952923865	3.28436588266177	1.14157717053455	0.317334090347062	0.999772751739274	-4.64208622642816
Q9H972	C14orf93	0.267685261053807	3.33214085594435	1.1524335326679	0.31333457219687	0.999772751739274	-4.6421214386451
P30050-1	RPL12	0.158362773764612	3.35227949725565	2.52793937832464	0.0648120648169482	0.999772751739274	-4.64282155772507
O75716	STK16	0.173694628718063	3.29530060364353	1.16575955653032	0.30848900806471	0.999772751739274	-4.64464640366153
Q9P253	VPS18	0.0890017941581918	3.30749745815689	2.04455974483664	0.110376426274259	0.999772751739274	-4.64580632746377
Q9H6N6	MYH16	0.219677876271722	3.24591798147156	0.396462994980732	0.71200600347755	0.999772751739274	-4.64633563278764
P57721-1	PCBP3	-0.163465426816417	3.31846843226781	-1.43201337439345	0.225411741714324	0.999772751739274	-4.64746025013041
Q02535	ID3	0.149595035515902	3.29689753974251	1.30686675665693	0.261331791037461	0.999772751739274	-4.64860514020507
P15291	B4GALT1	-0.22857716386496	3.34775018751569	-0.957783337340985	0.392414770042374	0.999772751739274	-4.65176538281624
Q99618	CDCA3	0.116227733988913	3.31436037824309	1.58980952414964	0.18708822017083	0.999772751739274	-4.65427610395552
Q8WUU4	ZNF296	-0.22700035891188	3.2843223933272	-0.563718992699316	0.603051922320542	0.999772751739274	-4.65589663902101
Q9UBK7-2	RABL2A	0.107001049604795	3.3152090300538	1.511220985704	0.205267026152889	0.999772751739274	-4.65605909812214
Q9H5Z1	DHX35	0.0961325714950926	3.30400143468468	1.79262322296827	0.147505787317524	0.999772751739274	-4.6562612040634
Q7Z340	ZNF551	0.342843408869604	3.21703667111349	0.541567703396708	0.61687370558034	0.999772751739274	-4.65814784769317
Q9BPU9	B9D2	-0.246009452338295	3.32243066335244	-0.758896095521319	0.490178734139803	0.999772751739274	-4.65823026984153
Q9H9L7	AKIRIN1	-0.182281767439092	3.34483207983241	-1.084931779064	0.338972098509904	0.999772751739274	-4.6582493802746
O75525-1	KHDRBS3	0.073471433587757	3.32664631518228	1.90862095358731	0.128957035303788	0.999772751739274	-4.6588610155084
P12829	MYL4	-0.227131283098511	3.31102881972946	-1.26996734468866	0.272951764157171	0.999772751739274	-4.66067576212804
Q6PII5-2	HAGHL	0.140178417154773	3.30905961544061	1.29138641529019	0.266147327362192	0.999772751739274	-4.66101852391741
Q13642	FHL1	0.237690277186812	3.30666962539242	0.776452269501204	0.480840502237908	0.999772751739274	-4.66115116088321
P48058-1	GRIA4	0.241590067664402	3.37468200825684	0.783463020940896	0.477149776917857	0.999772751739274	-4.66134607553547
O15460-1	P4HA2	0.130345165183628	3.32540379565613	1.63297134149929	0.177818702008441	0.999772751739274	-4.66316488207747
O15085-2	ARHGEF11	0.14487275103906	3.31030123756009	1.37183598357163	0.242031144790223	0.999772751739274	-4.66406131325159
P21964-1	COMT	0.152146797357628	3.31557948157542	1.62480386941645	0.179535464897319	0.999772751739274	-4.6660343867569
Q12926	ELAVL2	-0.0911367299757788	3.33013510135197	-1.85356408734716	0.13742723224081	0.999772751739274	-4.66761469655462
Q9Y566-1	SHANK1	-0.18575410071986	3.31277818829978	-1.12176520993728	0.324754271627902	0.999772751739274	-4.66771036584632
P41091	EIF2S3	-0.0772192739473279	3.33267634315017	-2.39721658533373	0.0745869038196905	0.999772751739274	-4.66847639665832
Q7Z7M0	MEGF8	0.126387932454696	3.33755274499647	1.39310868976084	0.236021556315423	0.999772751739274	-4.66850936502504
Q9BV57	ADI1	-0.171104646794832	3.3143518524788	-1.75787958038261	0.153602881327479	0.999772751739274	-4.66930151459065
Q9Y6Q2-3	STON1-GTF2A1L; STON1	0.230926738146338	3.3220145230714	1.05891314224794	0.349351853439137	0.999772751739274	-4.67119565399805
Q9ULI2-1	RIMKLB	0.145384548639377	3.2675860052315	1.30575826817859	0.261673788728658	0.999772751739274	-4.67148743988044
P36406-1	TRIM23	-0.00611812242867442	3.3551950255241	-0.0129295097885613	0.990303257812405	0.999772751739274	-4.67150055131729
O95461-1	LARGE; LARGE1	0.207381963256995	3.30555933069636	0.95748441956646	0.392548581781381	0.999772751739274	-4.67260591915549
Q9ULI3	HEG1	0.215649169096072	3.34469200183526	0.796774112987878	0.470202597383246	0.999772751739274	-4.67268268597061
Q8N448	LNX2	0.140304130313301	3.31345778212482	1.34632589752995	0.24943708748024	0.999772751739274	-4.67317096118301
P81408-4	FAM189B	0.243507122463769	3.28956999553883	0.84411401646664	0.446135959576697	0.999772751739274	-4.67386474234751
Q9HAC7-3	C7orf10; SUGCT	0.14184082293183	3.31497397090407	1.43312730250228	0.225115072974151	0.999772751739274	-4.67579784989149
O60678	PRMT3	-0.0776682947135707	3.31646848436067	-1.91127049750649	0.128563911118999	0.999772751739274	-4.67627256647861
P15374	UCHL3	-0.0607434644066871	3.31146196046056	-2.20071453673122	0.0925849325590126	0.999772751739274	-4.67710171113322
Q6ZSZ6	TSHZ1	0.0471129277533414	3.3259454729455	0.106565009565001	0.920265203346277	0.999772751739274	-4.67760784513064
Q96EF0-1	MTMR8	-0.182584026246204	3.34961467276452	-0.987445299868767	0.379329533703595	0.999772751739274	-4.6781859212902
Q70J99-3	UNC13D	0.091399195517011	3.30855373530612	1.65342869376787	0.173593326508276	0.999772751739274	-4.6791100868097
Q9Y385	UBE2J1	0.217132583085496	3.32035694467953	1.25368068082249	0.278237275044447	0.999772751739274	-4.67929649836057
Q92771	DDX12P	0.198133809574157	3.34383515039129	0.611171354611223	0.57411534045207	0.999772751739274	-4.68055152355367
Q8IUX7	AEBP1	0.217541560764777	3.33503626326165	0.568060306506099	0.60036619926568	0.999772751739274	-4.68173189247511
Q8NFZ4	NLGN2	0.138359732304552	3.27986263574551	0.345991979541406	0.746782137501193	0.999772751739274	-4.68229134676387
Q5VUJ9-2	EFCAB2	0.151441816082518	3.29894922903136	1.16816522068205	0.3076217161428	0.999772751739274	-4.68351722700829
Q9BUJ0	ABHD14A	0.127035867164654	3.32090846396938	1.39883989008448	0.234427913774269	0.999772751739274	-4.68411924043127
Q8N3J6-3	CADM2	0.22825012609943	3.29947453387715	1.35813771301735	0.24598064626021	0.999772751739274	-4.68425277541001
Q9BYI3-1	FAM126A	0.198979030150122	3.33165540174119	0.957647924872125	0.39247538315065	0.999772751739274	-4.6846001628174
P23769-1	GATA2	-0.0862610466436967	3.35857674698656	-1.74718105966258	0.155533870915726	0.999772751739274	-4.68681346980855
Q9UHD9	UBQLN2	-0.0973544945492899	3.32675304457434	-1.71889536277699	0.160764123626626	0.999772751739274	-4.68727261541153
P17655-1	CAPN2	0.103371059127864	3.30975908567579	1.88720527464169	0.132182757638104	0.999772751739274	-4.68817662845416
P10073	ZSCAN22	-0.155236609416266	3.38760008826857	-1.10802486130857	0.329993399941654	0.999772751739274	-4.68833941502325
Q969W3-2	FAM104A	-0.20749331307707	3.36809568093661	-0.768692751314278	0.484950925979551	0.999772751739274	-4.68974528884965
O43709-3	WBSCR22; BUD23	0.138218985952104	3.30894053415067	1.54156551512119	0.198042291587486	0.999772751739274	-4.68976241154712
Q96G75-1	RMND5B	-0.176378763463295	3.26761249401684	-1.04779321822216	0.353874082319595	0.999772751739274	-4.6912308385112
Q86YS3	RAB11FIP4	0.147866107434012	3.27547387717843	1.38817891777489	0.237400944281675	0.999772751739274	-4.69135443458541
P11362-21	FGFR1	0.00958581421978534	3.35646179794518	0.0235695829747248	0.982324953944302	0.999772751739274	-4.69157209565967
Q16667	CDKN3	-0.127179825652351	3.31057880066893	-1.35468966375698	0.246984743217042	0.999772751739274	-4.69161899894525
Q9H706	FAM59A; GAREM; GAREM1	-0.176964212682669	3.34750330319664	-0.569705958447353	0.599350126461148	0.999772751739274	-4.69305466335019
Q9H799-1	C5orf42	0.1256196983248	3.33055119798944	1.28761685050206	0.267332872277291	0.999772751739274	-4.69601783563114
P28676	GCA	-0.113274053538825	3.30084143348362	-1.42843914859781	0.226366297555812	0.999772751739274	-4.69757048157698
B2RTY4-4	MYO9A	0.07779705404597	3.33628749162491	1.76687361307744	0.151999233335728	0.999772751739274	-4.69765719155264
Q2TAA2	IAH1	-0.155299518822376	3.30606553765745	-1.47219622029769	0.214954259694442	0.999772751739274	-4.69897651000108
O94972	TRIM37	0.122481458694207	3.32381065990577	1.43724521139625	0.224021754330036	0.999772751739274	-4.69937839489456
Q96BH1	RNF25	-0.094797549545904	3.33228480608408	-1.58414476653067	0.188341427185011	0.999772751739274	-4.69947913221201
P84085	ARF5	0.105840817024909	3.29916815870602	1.84249486909678	0.139201516951302	0.999772751739274	-4.70010229471696
Q5U5X8	FAM222A	-0.170502285508749	3.36671371977659	-1.05280846298041	0.351828074828085	0.999772751739274	-4.70061032870116
Q9BZR6	RTN4R	0.180180815821656	3.31499517955222	1.31236544753241	0.259641705048467	0.999772751739274	-4.70151810480186
P13611-2	VCAN	0.104736580651059	3.30404305274143	1.48108070905659	0.212708876983225	0.999772751739274	-4.70161029954884
Q12891	HYAL2	0.368796951072873	3.25630449831738	1.12111989727618	0.32499861544363	0.999772751739274	-4.70219150227666
Q14934-2	NFATC4	0.136071750062155	3.32787556232199	1.19096696656854	0.299513355022424	0.999772751739274	-4.70483645502078
Q8WUF5	PPP1R13L	0.110570121225426	3.30609294501551	1.46765871084075	0.216110248304647	0.999772751739274	-4.70595843912198
Q92989-1	CLP1	-0.0739184510202897	3.32346413091854	-1.84135582562914	0.13938548663929	0.999772751739274	-4.70712836337683
Q96EN9-1	C19orf60; REX1BD	-0.0260044534694972	3.29603482541592	-0.0706336789146332	0.947080018387005	0.999772751739274	-4.70802238325491
Q15291-1	RBBP5	-0.0590039467985032	3.33272735122438	-2.11974200796552	0.10137766175681	0.999772751739274	-4.70884876041503
Q9UL42	PNMA2	-0.180092254654586	3.33322177181909	-1.10625360858684	0.330674348601776	0.999772751739274	-4.71054939839572
P69849	NOMO1; NOMO3	0.145450388778236	3.32154690937814	1.18147114888967	0.302865528670658	0.999772751739274	-4.71088390809549
Q9BVA0	KATNB1	0.0653233037863099	3.30921755840487	2.00174057562521	0.115892278594615	0.999772751739274	-4.71121496587611
P48651	PTDSS1	0.195670236926543	3.38268839331987	1.47872978137787	0.213300711458196	0.999772751739274	-4.71173822996871
Q96JS3	PGBD1	0.14607472504771	3.31318872111205	1.33902459576526	0.251597413214648	0.999772751739274	-4.71237000427029
P21802-11	FGFR2	-0.0995028813723359	3.36218425726935	-0.28431823032796	0.790279088099878	0.999772751739274	-4.71277937463181
O95696-2	BRD1; LOC90834	0.139853529107699	3.29467281614032	1.3238506632949	0.25614580097773	0.999772751739274	-4.71299146763686
Q9NXR5	ANKRD10	-0.183510898999732	3.31333870132718	-0.382632218392817	0.721456930593136	0.999772751739274	-4.71467099353181
Q9NX70	MED29	0.0914751330117817	3.31553138593804	1.60849448792863	0.18301535992268	0.999772751739274	-4.71476772461106
O60337	MARCH6	-0.228565447966084	3.37204906742664	-1.28106086045245	0.269406908269996	0.999772751739274	-4.71619313238283
Q13362-4	PPP2R5C	0.362821454628337	3.24159825059845	1.0195857369186	0.36557921326448	0.999772751739274	-4.71672593859194
Q96T66-1	NMNAT3	0.165698878950115	3.30646663708306	0.931548983419468	0.40430737889294	0.999772751739274	-4.71729794466856
Q9Y6M7-13	SLC4A7	0.276564286924909	3.27136568739217	1.35781415242976	0.246074698574171	0.999772751739274	-4.71736071255451
Q13454-1	TUSC3	0.218272163465079	3.35642452433761	1.47747140680763	0.213618184998639	0.999772751739274	-4.71736169494021
Q8WU58	FAM222B	0.13466779773503	3.32148690939467	1.25142360792828	0.278977445807131	0.999772751739274	-4.71902584592794
Q96CS4	ZNF689	-0.0974525139490224	3.34084023751928	-1.58570827879689	0.18799466958893	0.999772751739274	-4.71919015524675
Q96BV0	ZNF775	-0.0739834453264251	3.37267766709232	-0.221293670183528	0.835702452875625	0.999772751739274	-4.71977342539042
Q3V5L5-2	MGAT5B	0.164313746349295	3.29548091197929	0.880945044382733	0.428102818110936	0.999772751739274	-4.72082511218666
Q6PUV4	CPLX2	0.823680305892619	3.25528115629982	1.73870887338547	0.157081286985695	0.999772751739274	-4.72096804222909
Q9HAT8	PELI2	-0.132488378545158	3.34238674085731	-1.44349861013368	0.222371624271723	0.999772751739274	-4.72129460093482
Q9Y223-2	GNE	-0.113126767887439	3.31357910312046	-2.01370227521996	0.114321573888877	0.999772751739274	-4.72146221083762
Q9H1U4	MEGF9	0.169467437773489	3.31595440738807	0.92783300511139	0.406016306015897	0.999772751739274	-4.72157786701958
P19419-1	ELK1	-0.220079995269704	3.31557732836447	-1.33197520729057	0.253700570881385	0.999772751739274	-4.72199677260032
Q5TB30	DEPDC1	-0.0452973671018878	3.35600075975721	-0.131625829460143	0.901635875645095	0.999772751739274	-4.72296757701896
Q9H2G4	TSPYL2	-0.203984261099522	3.37339956960827	-0.775077024390826	0.481567051895208	0.999772751739274	-4.72356229940772
Q9UJF2-2	RASAL2	0.131322470423522	3.31860943765788	1.25102781730854	0.279107432664411	0.999772751739274	-4.72404756170052
O14519	CDK2AP1	-0.133138455427803	3.35520146607105	-1.55615475131765	0.194661864024946	0.999772751739274	-4.72438812581504
Q9NQ84-2	GPRC5C	0.144881913635612	3.3148925976928	1.55761193650853	0.194327492464977	0.999772751739274	-4.72490842764584
O00628	PEX7	-0.139335216406442	3.31030688916691	-1.3236629441797	0.256202569314154	0.999772751739274	-4.7250761736702
Q8N370-3	SLC43A2	0.176356205144922	3.3115516450715	0.787963447070591	0.474792124386782	0.999772751739274	-4.7251837610216
Q9HD34	LYRM4	0.110365094533511	3.30357931919556	1.54037536864406	0.198320697686355	0.999772751739274	-4.72564400850389
Q9BTN0	LRFN3	0.205850969601321	3.31926676583154	0.748856768382498	0.495580277873277	0.999772751739274	-4.72585258063353
Q9UBN1	CACNG4	0.218283381700603	3.28883305295906	1.17516671043726	0.305110429971983	0.999772751739274	-4.72596200763672
Q8N8J6-2	ZNF615	0.202336558481583	3.38567127068704	0.665755771157712	0.541997944523615	0.999772751739274	-4.72603861323761
P17405-1	SMPD1	-0.145172936788116	3.28441583943546	-0.490901846373718	0.649211742100555	0.999772751739274	-4.72654554902343
O00409	FOXN3	0.148693285146254	3.33935698510236	1.36666145479449	0.24351567348809	0.999772751739274	-4.72658337630416
Q8NHS3	MFSD8	0.246197844446842	3.23433684869446	0.677328577526697	0.535352732252785	0.999772751739274	-4.72732862293183
O14508	SOCS2	-0.156008043993176	3.29885745737957	-0.96906490533576	0.387392971350658	0.999772751739274	-4.72738202467873
Q9HCI5	MAGEE1	0.161344724722037	3.34278015408755	1.02359207696838	0.363896176054105	0.999772751739274	-4.72744798506701
Q5VYS8-1	ZCCHC6	-0.147290780151093	3.36032504025723	-1.5781529848597	0.189676415264159	0.999772751739274	-4.7282267171776
Q6ZMS4	ZNF852	-0.131009086095713	3.3653538647167	-1.17253343659198	0.3060526807068	0.999772751739274	-4.72849173934472
Q6UWZ7	FAM175A; ABRAXAS1	0.187414515680002	3.29224893679481	1.60932660866181	0.182836128505042	0.999772751739274	-4.72973542536673
L0R6Q1	SLC35A4	0.254106704396144	3.3058113566754	1.26469945263045	0.274650735084359	0.999772751739274	-4.72975609266031
O14713-1	ITGB1BP1	-0.123600234745922	3.27366434059567	-0.427354644293345	0.691123597251284	0.999772751739274	-4.73095251951758
P31629	HIVEP2	-0.161769448228603	3.32331786214888	-0.518992373691703	0.631160114297439	0.999772751739274	-4.73112769927163
O75478	TADA2A	-0.164219851672179	3.34939059435461	-1.56187900220217	0.193351744386137	0.999772751739274	-4.73154767991395
Q8N442	GUF1	0.080850176165711	3.30090305595219	1.80295333285143	0.145743134334612	0.999772751739274	-4.73288398093887
O75164-1	KDM4A	0.0891624290474076	3.30204051901627	1.68574533974156	0.167131064968724	0.999772751739274	-4.73322806486516
Q7Z6J6-1	FRMD5	0.149764848285471	3.3118959883866	0.998318819303788	0.374628023061564	0.999772751739274	-4.73416240611269
Q9UQ49-2	NEU3	-0.0887853306046624	3.30606022217059	-0.259179419192852	0.808289727773673	0.999772751739274	-4.73423232386526
Q14728	MFSD10	0.197552431083115	3.33841263919524	1.0165318702096	0.366866712575683	0.999772751739274	-4.73429943194607
Q9BUT9-1	FAM195A; MCRIP2	-0.0994441844648567	3.30729525632981	-0.316743261066323	0.767281814952358	0.999772751739274	-4.73445986091156
Q9H0Q3-1	FXYD6	0.286909687208844	3.36570948444991	1.20764777168784	0.29370888585399	0.999772751739274	-4.73521207550603
Q5T2D3	OTUD3	0.106124593773069	3.3140657511301	1.42546963836674	0.2271624280657	0.999772751739274	-4.73542521050227
Q96MT1-5	RNF145	0.195757919380864	3.34868586092272	1.32949392132268	0.254444932886783	0.999772751739274	-4.73567577409615
P38936	CDKN1A	0.0373210553122712	3.32439413017899	0.119325254535704	0.910771028849085	0.999772751739274	-4.73654080432996
O15514	POLR2D	0.141161189184999	3.34009938185332	1.62993853044997	0.178454181510431	0.999772751739274	-4.73654430420722
Q8NC67	NETO2	0.112758605250157	3.31154430218611	1.5553221191916	0.194853188348085	0.999772751739274	-4.73708053492295
Q0P6H9	TMEM62	0.210769535215717	3.36327318043736	0.784830456016474	0.476432459598997	0.999772751739274	-4.73782013814485
Q9BRJ2	MRPL45	-0.0735137486069161	3.30916489515979	-2.00247122660354	0.115795661052688	0.999772751739274	-4.73788035023689
P22694-2	PRKACB	-0.321739141306302	3.36414206230229	-1.26802454068881	0.273577169138703	0.999772751739274	-4.73801718195826
Q7L945	ZNF627	0.185433601956038	3.31959936459206	1.04907730487204	0.353349223439828	0.999772751739274	-4.73886283646699
P14550	AKR1A1	-0.10781448314429	3.31481980181852	-2.05142407267087	0.109519312559735	0.999772751739274	-4.73918577456333
Q6ZT21-1	TMPPE	0.18148919704406	3.39142277109046	0.919538332781492	0.409852821716036	0.999772751739274	-4.73941737586204
P43251-2	BTD	-0.0829099924131855	3.39409051996659	-0.278461023560651	0.794461879670237	0.999772751739274	-4.73948780284326
P16383-1	GCFC2	0.0987720028704999	3.32418669159733	1.78956928597506	0.148031236719359	0.999772751739274	-4.73967075991353
Q9Y3M8-1	STARD13	-0.124369504692917	3.34406887979878	-1.23270823619479	0.285187597723316	0.999772751739274	-4.74164651505693
O14526-1	FCHO1	0.107580675187311	3.37888589368392	0.322309851266277	0.763361849401949	0.999772751739274	-4.74213497071192
P48147	PREP	-0.052466249201696	3.30490682189879	-2.39664829369287	0.0746329088868218	0.999772751739274	-4.74228480149403
P02452	COL1A1	-0.228004096013815	3.35605360581387	-0.363731627472031	0.734469698642732	0.999772751739274	-4.74346572212538
P17677-1	GAP43	0.200018663483973	3.375603023674	2.23340439800478	0.089278837459053	0.999772751739274	-4.74380779251189
Q6NZI2-1	PTRF; CAVIN1	0.15853856424867	3.30877118723449	0.771427661416411	0.483499112742789	0.999772751739274	-4.74499767307469
Q9NQX5	NPDC1	0.157080921784113	3.32103977533271	1.08357808998898	0.339505215110668	0.999772751739274	-4.74514695086908
Q9H9F9	ACTR5	-0.103448501004261	3.3256926368058	-1.71253908949721	0.161964836149977	0.999772751739274	-4.74519923206022
Q9H246	C1orf21	0.163838877412346	3.39685144068131	0.970258766897921	0.386864781823919	0.999772751739274	-4.74524177940624
Q9P0T4	ZNF581	0.139347979427708	3.28601334915414	0.527827255844996	0.62554534279367	0.999772751739274	-4.74605312108542
Q8N999-1	C12orf29	-0.160690981869279	3.32120155357804	-1.78550659786532	0.148733345248052	0.999772751739274	-4.74607131604377
Q2LD37-1	KIAA1109	-0.176921668740307	3.37253520347427	-0.540240809437197	0.617707864160003	0.999772751739274	-4.74637863557847
Q9UPW0-1	FOXJ3	0.111300682683512	3.31305383499836	1.46501845159998	0.216785772673076	0.999772751739274	-4.74684866865855
Q8WYN0	ATG4A	-0.14525316945474	3.32092361052563	-1.11586910813405	0.326993053556497	0.999772751739274	-4.74722315278118
Q9UMR2-1	DDX19B	0.0751586651104312	3.32607661164613	1.81451648359929	0.143796752317489	0.999772751739274	-4.74776751864401
Q8IXX5	TMEM183A	-0.158891967574794	3.29729406394164	-0.985151589619275	0.380327799713481	0.999772751739274	-4.74821651342382
Q13948-2	CUX1	0.11940522360397	3.27929107896348	0.434202720355052	0.686538068760133	0.999772751739274	-4.74853056361377
O15033-1	AREL1; KIAA0317	0.182003239187498	3.37386299572577	0.995917127776987	0.375662092343981	0.999772751739274	-4.74859330583827
Q9Y4C4	MFHAS1	0.170545797355001	3.3284010689062	1.01641345256913	0.366916717083353	0.999772751739274	-4.74883427531669
Q9NV35	NUDT15	-0.165228051642657	3.33521167997532	-1.66023396248178	0.172211075208132	0.999772751739274	-4.75140858005634
Q9P244	LRFN1	0.00866629741334622	3.38046598270865	0.0291702709334737	0.978126292585416	0.999772751739274	-4.75147478047295
Q86WK6	AMIGO1	0.123173493645234	3.30872303547559	1.20000260512108	0.296355947115992	0.999772751739274	-4.75159331194287
Q16864-2	ATP6V1F	0.102899094366041	3.28075303881998	1.54591860774138	0.197027395826842	0.999772751739274	-4.75182687888279
O15355	PPM1G	0.0533609947598165	3.32018435883163	2.40182103178865	0.074215341848718	0.999772751739274	-4.75194343997509
Q96AY4	TTC28	0.0406271696469014	3.32225676924107	2.439454239599	0.0712559820843822	0.999772751739274	-4.75289661390644
A5PLL7	TMEM189; TMEM189-UBE2V1	-0.0886299419038474	3.29924782941158	-0.304738726785814	0.775763903986475	0.999772751739274	-4.75345434930714
Q8WVR3	C7orf43	0.155749363878445	3.40131187913434	0.606278939828398	0.577055638142497	0.999772751739274	-4.75358769957645
Q9BV29-2	C15orf57; CCDC32	0.174932289570956	3.29468657987411	1.1396910363334	0.318033731933053	0.999772751739274	-4.75360508321584
Q765P7	MTSS1L	-0.139224501960504	3.35078192446303	-1.18151854007614	0.3028487120458	0.999772751739274	-4.7548055387049
Q96K21	ZFYVE19	-0.201777436943339	3.33389554804906	-1.21019005488856	0.292833591192577	0.999772751739274	-4.75562912069429
P09564	CD7	0.182690416791324	3.31858764162512	0.951909714656398	0.395051261890022	0.999772751739274	-4.75586001007391
Q96QA6	YPEL2	-0.144047939776963	3.36960546161331	-0.973578135899243	0.38539947383281	0.999772751739274	-4.75598652263079
Q9UL33-1	TRAPPC2L	-0.104531330938661	3.32352933307663	-1.45753619336211	0.218711732134742	0.999772751739274	-4.75701268289175
Q9UL40-1	ZNF346	-0.100676918530635	3.34207979768948	-1.72223957649613	0.160136171038521	0.999772751739274	-4.75786658092799
Q9HBT8-2	ZNF286A	-0.128000443700755	3.3343687116295	-1.10540803731749	0.33099987467366	0.999772751739274	-4.75864590170011
Q9Y333	LSM2	-0.15697916720992	3.32821766954844	-1.76035599130043	0.153159548248786	0.999772751739274	-4.75883203618296
Q16594	TAF9	0.126466771294523	3.29622151414077	1.13111066072962	0.321234487262195	0.999772751739274	-4.75943231069232
Q96EH3	MALSU1	0.210895253885926	3.23544974959328	1.43755796194667	0.223938935675773	0.999772751739274	-4.75949046474493
Q13873	BMPR2	0.126919714088297	3.30929135346732	1.24572856374346	0.280853409539117	0.999772751739274	-4.75979482652333
Q9H3H3-3	C11orf68	-0.103048636666879	3.30837461977874	-1.38478534966588	0.238355129433519	0.999772751739274	-4.76027946438141
O60304	ZNF500	-0.147760748182935	3.35271008597494	-0.838531644683582	0.44892192150563	0.999772751739274	-4.76069727854306
Q9NQL2-1	RRAGD	0.156572793165049	3.28328011217394	1.08075971346823	0.340617589062445	0.999772751739274	-4.76236421984112
Q8WY41	NANOS1	0.23220876975419	3.27324036045295	1.15123904710225	0.313772332954116	0.999772751739274	-4.76294470720495
Q8NCN2	ZBTB34	-0.154967735470215	3.33715028831019	-1.38279402948883	0.238916804692246	0.999772751739274	-4.76436142922952
Q6ICH7	ASPHD2	0.118607772705645	3.38993481014081	0.400424150312755	0.709310617897425	0.999772751739274	-4.76481073227999
Q16540	MRPL23	-0.137207144031939	3.32384964488314	-1.0316402523799	0.360535797496945	0.999772751739274	-4.76528861083603
Q96G21	IMP4	0.0850072878561841	3.28960123226387	1.64767470108881	0.174771092321026	0.999772751739274	-4.76556850895535
Q9Y5E4	PCDHB5	0.16655436447084	3.26430476474792	0.841383156675979	0.447497097686175	0.999772751739274	-4.76573686522147
O15535-2	ZNF193; ZSCAN9	-0.148704812246559	3.40158013049681	-0.722974714922721	0.509711776026096	0.999772751739274	-4.76585301887473
O60307	MAST3	0.0808791573865974	3.32305188501665	0.199826990075508	0.851364411512749	0.999772751739274	-4.76612617783497
P07237	P4HB	0.0704416861402747	3.32696392476893	2.51076637866212	0.0660088798806626	0.999772751739274	-4.76654731649295
Q86X83	COMMD2	-0.146087869177483	3.32010074810703	-1.50344637608896	0.207160956383593	0.999772751739274	-4.76672146073636
Q9Y2V0-1	C15orf41	-0.167519307701546	3.30761333469613	-1.20628293831209	0.294179807403282	0.999772751739274	-4.76733780980699
Q9UBP9	GULP1	0.088978018693424	3.28743795842554	1.66590695335422	0.171067605981393	0.999772751739274	-4.76784748411684
Q9BZ23	PANK2	0.156183044203169	3.29782957117372	1.06984068504304	0.344958219447137	0.999772751739274	-4.76801592989271
Q13136	PPFIA1	0.0758908250327105	3.3138307469316	1.86799982208969	0.135149804544189	0.999772751739274	-4.76928793052104
Q9H0X9	OSBPL5	-0.15215821523745	3.35623096235468	-0.511276424678599	0.636088519137253	0.999772751739274	-4.76996751656344
Q15777	MPPED2	-0.0555049319253833	3.36574743403642	-0.189798256679885	0.858710392954504	0.999772751739274	-4.77086624444257
Q5HYA8	TMEM67	0.140221835122275	3.32179152116762	0.590550347919425	0.586575973443146	0.999772751739274	-4.77094595518229
Q8NCA5	FAM98A	-0.0737890640838643	3.34201621050296	-2.11186941701071	0.102280847003636	0.999772751739274	-4.77101440178874
Q9NYJ8-1	TAB2	-0.1318824770174	3.32840479332125	-1.59070429107625	0.186891061261559	0.999772751739274	-4.77139902200564
Q9H0M0-1	WWP1	-0.135218331661803	3.3190675562045	-0.44932184304471	0.676471960440322	0.999772751739274	-4.77153871996864
Q9BXT5	TEX15	-0.156003538335077	3.33467968022793	-0.93274535047488	0.403758477252238	0.999772751739274	-4.77157217513812
P56589	PEX3	0.107518471294597	3.317344144198	1.34223514743344	0.250645219742522	0.999772751739274	-4.77175824832692
Q9H3W5	LRRN3	0.14774512761545	3.28858708395782	0.793635897688869	0.471833342650995	0.999772751739274	-4.77249737995366
Q5M7Z0	RNFT1	-0.122869352547712	3.38329925053578	-0.517537156408601	0.632087846049924	0.999772751739274	-4.77252235653234
O14492	SH2B2	-0.0161583939190394	3.33013857110504	-0.0558022408801571	0.95817567413323	0.999772751739274	-4.77257609582387
Q969T3	SNX21	-0.236496046270389	3.26483319161189	-0.937725569927941	0.401480269000606	0.999772751739274	-4.77293572231459
Q9NPJ3-1	ACOT13	-0.107374623397232	3.31920724302887	-1.35479534890298	0.2469539071769	0.999772751739274	-4.77337173805768
Q6P4Q7	CNNM4	0.162829034554703	3.30313634496345	0.707792239613927	0.518138924452212	0.999772751739274	-4.77340143637657
P55283	CDH4	0.132353895293885	3.40274135708785	0.492895296998355	0.647920832427651	0.999772751739274	-4.77348013326471
Q8NB42-1	ZNF527	-0.190069383999368	3.35702191874988	-0.808329571950347	0.464235780444814	0.999772751739274	-4.77365384191926
P43351	RAD52	-0.153395823251532	3.33467744741777	-0.556024966823923	0.607830483441698	0.999772751739274	-4.7739804174221
O75431	MTX2	-0.153797311802171	3.34546427103925	-1.74114435239544	0.156634791323997	0.999772751739274	-4.77411244591505
Q9Y5X3	SNX5	-0.0758665926798009	3.323332314433	-1.99373441873528	0.11695677282091	0.999772751739274	-4.77635101390797
Q9BRB3-1	PIGQ	0.130328585384006	3.3385499157272	1.12444480663077	0.323741456026209	0.999772751739274	-4.77636485574469
O75449-1	KATNA1	0.0926303157631172	3.31789949068371	1.66384999307788	0.17148129356168	0.999772751739274	-4.77701533831611
Q9UNS2	COPS3	-0.0497932104853528	3.32490364305531	-2.22223665379689	0.0903932115918011	0.999772751739274	-4.77744077570345
Q9BR11	ZSWIM1	0.0265497968942624	3.34101137407376	0.0855200275182262	0.935957869157665	0.999772751739274	-4.77746304726396
Q6ZWE6-1	PLEKHM3	0.0960949061251319	3.31498681071409	1.52258905327488	0.202529398212599	0.999772751739274	-4.77752914883564
Q9NVD3	SETD4	-0.051740728441797	3.12566417651886	-0.079180434069833	0.940692435491475	0.999772751739274	-4.77754052072992
O43309	ZSCAN12	-0.139852125068666	3.36373325133584	-0.934306605590215	0.403043107652638	0.999772751739274	-4.77866797312468
Q8WVP5	TNFAIP8L1	0.0811894746943169	3.25671323657517	0.28820395688944	0.787508879408732	0.999772751739274	-4.77925712218802
Q96NT3-3	GUCD1	-0.136622629708122	3.32341618891553	-0.651416732167709	0.55031178299777	0.999772751739274	-4.77959447351113
Q9BPZ3	PAIP2	-0.195585912902732	3.33013301276822	-1.29729447135299	0.264299432462614	0.999772751739274	-4.7800351851047
Q96I99-1	SUCLG2	0.0668487494679011	3.30209506392887	1.85471365183447	0.13724436757439	0.999772751739274	-4.78047643040662
O75373	ZNF737	-0.156081280907046	3.35104053143717	-0.684868370633012	0.531054583023677	0.999772751739274	-4.78117633836891
Q8TF30	WHAMM	-0.0184256897079265	3.34327838209736	-0.063476163027562	0.952433055878714	0.999772751739274	-4.78251430995969
Q969Y0	NXPE3	-0.141307401722751	3.29139324731237	-0.83818833427173	0.449093709063627	0.999772751739274	-4.78321555727392
P62380	TBPL1	0.123558590660985	3.28717637907694	1.14967500210822	0.314346386781521	0.999772751739274	-4.78364413414895
P05387	RPLP2	0.310285101484615	3.33775797332581	2.20783057399687	0.0918537637493348	0.999772751739274	-4.78403040979907
Q8TBZ8	ZNF564	0.100696802517771	3.3244820642921	0.387581099931672	0.718068195260682	0.999772751739274	-4.78429555212927
Q9C0B9	ZCCHC2	0.105144412239988	3.3248375960607	0.427349854179003	0.691126810396839	0.999772751739274	-4.7843152221096
Q9Y2E4	DIP2C	0.119582226183365	3.3041335784261	1.19535279046044	0.297976852461727	0.999772751739274	-4.78479551044045
Q9UPP2	IQSEC3	-0.0657600438609254	3.30637157026723	-0.251980464631209	0.81347462156245	0.999772751739274	-4.78497943780555
Q8ND90	PNMA1	-0.0895006357144132	3.33018589632608	-1.54306038358873	0.197693170125481	0.999772751739274	-4.78650152800773
Q9UDW1	UQCR10	0.162382405684816	3.24883833770348	1.26675865638747	0.273985407770617	0.999772751739274	-4.78697900274015
Q9Y4X4-1	KLF12	-0.144234139732804	3.33700275788359	-0.628726296166127	0.563647797875106	0.999772751739274	-4.78737823731055
P58004	SESN2	0.0913466997847897	3.27235175224477	1.474375163001	0.214401366825204	0.999772751739274	-4.78759807752531
Q9NVX2	NLE1	0.0769753690704347	3.30347261472154	1.93637181058179	0.124903356912082	0.999772751739274	-4.78781232373208
O43739	CYTH3	-0.171780075291758	3.33118741941242	-1.37798067356342	0.240279881175062	0.999772751739274	-4.78789993222838
Q9NRW3	APOBEC3C	-0.15273465840054	3.30077651393334	-0.743290362639205	0.498594488017707	0.999772751739274	-4.7880409161872
O75820-1	ZNF189	-0.156408518934263	3.4102168708094	-0.766586381139866	0.486071350628467	0.999772751739274	-4.7885529747684
Q96AX9-14	MIB2	-0.0184691365669453	3.33430940328973	-0.0553680503303521	0.958500687284268	0.999772751739274	-4.78894571796049
Q9GZP1	NRSN2	0.0752080351450945	3.29452995842579	0.261118393758375	0.806895241158006	0.999772751739274	-4.78915862534203
Q9UF56-1	FBXL17	-0.0875065154940461	3.33130243540923	-1.53280278309413	0.200101529069976	0.999772751739274	-4.78921332557819
Q0P5N6	ARL16	0.184048790366069	3.2948915036086	0.827037469911695	0.454702027942918	0.999772751739274	-4.78976430756489
Q9NZB8	MOCS1	0.122975402901654	3.32667270760574	1.12633267055348	0.32302963229058	0.999772751739274	-4.79016696330408
Q99502-1	EYA1	0.121514258612375	3.30964340298011	1.38676435242986	0.237798223482194	0.999772751739274	-4.79062314723228
Q86UA6-8	RPAIN	-0.157135569595993	3.32399971917307	-1.44926275852025	0.220861400526763	0.999772751739274	-4.79085960875087
Q9UJU3	ZFP112; ZNF112	0.0738780458383328	3.30366563779376	0.277696576374098	0.795008413362705	0.999772751739274	-4.79087443476763
O43665-3	RGS10	-0.0959649684574463	3.32912679508618	-1.47477570267179	0.214299888834678	0.999772751739274	-4.791529512994
Q7Z6J0-1	SH3RF1	0.0863154041337646	3.31874176653465	1.80490728947383	0.145412263814102	0.999772751739274	-4.79186710399667
Q8WWZ7-1	ABCA5	0.120882550660607	3.3157634161298	1.07796234472592	0.341724917840247	0.999772751739274	-4.7927839821975
Q9H8N7	ZNF395	0.137157315674849	3.28822856551794	0.638720264092549	0.557746915364657	0.999772751739274	-4.79296902353181
P36956-4	SREBF1	0.139114103079564	3.34401023065155	1.06164702436203	0.348247971021982	0.999772751739274	-4.79299141200858
Q49A26-2	GLYR1	-0.100398808090604	3.3485552854458	-1.59437412340121	0.186084670200792	0.999772751739274	-4.79310372881547
Q9BRQ8-1	AIFM2	0.115534466590742	3.30468362751691	1.49864236952473	0.208340104440286	0.999772751739274	-4.79436655727485
Q6NT04	TIGD7	-0.0911588218170095	3.33947105824239	-0.333839118683116	0.755270355990292	0.999772751739274	-4.79447264293738
Q6ZMZ3	SYNE3	-0.135320570064343	3.39487129836317	-0.695133462006648	0.525242660371703	0.999772751739274	-4.79459877223453
Q8TAB5	C1orf216	0.0268656439891301	3.32952508659535	0.102582224523184	0.923231954525212	0.999772751739274	-4.79480052450831
Q96PX8	SLITRK1	0.134750269119512	3.34182662824131	0.786447302791051	0.475585383315179	0.999772751739274	-4.79484895149009
Q9H3R5	CENPH	0.0906028921923169	3.30666626248828	1.85337860238941	0.137456762444835	0.999772751739274	-4.79493100086913
Q8TCG5-1	CPT1C	0.142532327101598	3.36732807395685	0.783350008614383	0.477209097232517	0.999772751739274	-4.79496294329064
Q8N1S5-1	SLC39A11	-0.0564493127882755	3.41312422164088	-0.155461313876493	0.883988017824686	0.999772751739274	-4.79529175281479
Q13286-1	CLN3	0.188909319523894	3.32258488370356	0.738219644758051	0.501352232441314	0.999772751739274	-4.79578389018882
Q8NB59-1	SYT14	0.121360732082505	3.32150416588662	1.27756128274082	0.270520364277076	0.999772751739274	-4.79595550102307
Q8N565-2	MREG	0.119181222486566	3.28952514640255	1.2797137086686	0.269835006352853	0.999772751739274	-4.79637074501737
Q9NS15-1	LTBP3	-0.106984117325269	3.35141990612664	-0.460021405936156	0.669397198637118	0.999772751739274	-4.79673521266441
Q7Z5L2-2	R3HCC1L	0.0851617858845583	3.31439393976713	1.59973045554716	0.184914150152824	0.999772751739274	-4.79678328411433
Q9NXU5	ARL15	0.139621121627031	3.32117709109839	0.634171645101563	0.560427357593935	0.999772751739274	-4.79775070986892
P17707-1	AMD1	0.111087603587593	3.29412414389127	1.30950553700882	0.260519402649583	0.999772751739274	-4.79810595355053
P17019	ZNF708	0.103632022082783	3.30971940476141	0.411565799023357	0.701756878390222	0.999772751739274	-4.79811518536754
P80370-1	DLK1	0.189103169546326	3.28962082037644	1.54458881329633	0.19733686236947	0.999772751739274	-4.79868776545703
P37287-1	PIGA	0.145910877913113	3.35887107334595	0.821834939180255	0.457337617439909	0.999772751739274	-4.79934267777732
Q96MH6-1	TMEM68	0.121421905986641	3.35696923993976	0.361997377324406	0.735669213880666	0.999772751739274	-4.79961819613885
Q15493-1	RGN	-0.141407774703003	3.32428170211158	-0.560011703609601	0.605351445196249	0.999772751739274	-4.80093132019
Q8WWL2-1	SPIRE2	0.0663771099309854	3.38929438926763	0.261948003467013	0.806298860732482	0.999772751739274	-4.80106025076669
O15116	LSM1	-0.122093938321488	3.31210698700199	-1.07421561342614	0.343213123806705	0.999772751739274	-4.80106504738033
P0C0L4-1	C4A; C4B	-0.172749606376376	3.35440207211801	-1.56473014539791	0.192702582856189	0.999772751739274	-4.8013358203755
O15120	AGPAT2	0.200337990323601	3.39445708315182	1.13980572051147	0.317991150502272	0.999772751739274	-4.80143297075598
Q9NUA8-1	ZBTB40	0.0826693397780595	3.34470314916566	1.81646582369573	0.143471375844017	0.999772751739274	-4.8016650407516
Q9Y4D7-1	PLXND1	0.133083223949867	3.2945603757278	0.986700080136134	0.379653618386106	0.999772751739274	-4.80319052362209
P17787	CHRNB2	0.139276821143269	3.35594885988025	0.889963921441056	0.423778925174247	0.999772751739274	-4.80333122149368
O94900	TOX	0.14021862696387	3.30432000594634	0.870930504933779	0.432946375409437	0.999772751739274	-4.80491645036316
O43189	PHF1	0.114311494093591	3.3632130264104	0.522421805034861	0.628977025833304	0.999772751739274	-4.80528396443634
Q9NSU2-1	TREX1	-0.119022622422206	3.33981860649736	-1.25509132554362	0.277775630198279	0.999772751739274	-4.80537594294638
O96018	APBA3	0.129370637010879	3.36612094299914	0.726895823250331	0.507551833962646	0.999772751739274	-4.80563957881832
Q9UNK0	STX8	0.20425426258363	3.29600495233444	1.37245274649193	0.241854797211363	0.999772751739274	-4.80568071138623
P67936	TPM4	-0.169956329047464	3.2950803912947	-1.5497100744353	0.19614778335116	0.999772751739274	-4.80580522907978
Q14520-1	HABP2	-0.416379052161319	3.46543550566862	-1.05818438343785	0.349646637727132	0.999772751739274	-4.8064491191023
P19438-1	TNFRSF1A	0.135648813659014	3.32913458831131	0.949944987770928	0.395936529752228	0.999772751739274	-4.8065234236992
Q8N8Q8-1	COX18	0.148832201379915	3.34615105259807	1.00481260705185	0.371844467443897	0.999772751739274	-4.80669676727233
Q9UM47	NOTCH3	0.127750085535461	3.35379081280844	0.667769331506369	0.540837573001058	0.999772751739274	-4.80712294317587
Q969H0	FBXW7	-0.141046522498026	3.34596723833766	-0.980162095234834	0.382507170001502	0.999772751739274	-4.80746218981327
O60674	JAK2	0.135402177685896	3.35926423001629	0.57704458628576	0.594832467662267	0.999772751739274	-4.80808881157799
P56178	DLX5	0.116599157666341	3.29910242672456	0.599731986205001	0.581005939697114	0.999772751739274	-4.80857449423833
Q6ZTU2-6		0.118678150534851	3.27627736660448	1.14813603246673	0.314912184578928	0.999772751739274	-4.80870547963593
Q86V87	FAM160B2	0.11568228177184	3.24926246565191	0.541176642930761	0.617119475230824	0.999772751739274	-4.80958022745262
Q9BUH8	BEGAIN	-0.180829807660215	3.32781986358059	-1.03168499792605	0.360517191535325	0.999772751739274	-4.80970578971608
P55268	LAMB2	0.100023806633894	3.32491938123343	1.62781508764079	0.178900523197662	0.999772751739274	-4.81311598583823
Q8TDY2-1	RB1CC1	0.063974684325211	3.32678482218654	2.03512396255058	0.1115666888186	0.999772751739274	-4.81462684432688
Q9HBR0	SLC38A10	0.124917397851206	3.32192952343576	0.907227408820016	0.415602866568414	0.999772751739274	-4.81466904513105
Q96NG3-1	TTC25	0.084321519391081	3.3375829949044	0.382310023159412	0.72167782245409	0.999772751739274	-4.81607104343303
Q92685-1	ALG3	0.222037413265262	3.34642847801846	0.840582983206243	0.447896556829659	0.999772751739274	-4.81634188531079
Q9Y289	SLC5A6	0.194438321647962	3.30173014736707	1.6140733075307	0.181817207238018	0.999772751739274	-4.81639404823526
Q9H9S5	FKRP	0.156803000307945	3.31593841414439	0.882395908486084	0.427404798507969	0.999772751739274	-4.81648455417097
Q6P4H8-1	FAM173B	0.132111941704578	3.32449026629952	0.796969814479095	0.47010104837667	0.999772751739274	-4.81694875106335
Q8N392-1	ARHGAP18	0.0600730895113597	3.2972707463051	0.245079003156509	0.818456133823218	0.999772751739274	-4.81695071326028
A8CG34-1	POM121C	0.208435348312867	3.43323832598933	0.497283496277952	0.645084411114959	0.999772751739274	-4.81704419120357
Q92604	LPGAT1	0.146306945955355	3.3420162265906	1.00305703396012	0.372595207969635	0.999772751739274	-4.81784759463049
P05155-3	SERPING1	0.124134626323015	3.36184708844626	0.909736741744368	0.414425408508772	0.999772751739274	-4.81792586973812
Q9ULD6	INTU	0.115421912179589	3.34582029323277	1.1228120861155	0.3243582357522	0.999772751739274	-4.8183770453675
P28482	MAPK1	0.0828569278366944	3.30288517758203	1.73190930438917	0.158334997736692	0.999772751739274	-4.81896707238941
Q53EQ6-1	TIGD5	-0.131351238111561	3.33884435434788	-0.674363827103859	0.537049589657028	0.999772751739274	-4.81921875317909
Q96JQ2	CLMN	0.113746951709776	3.31747149000081	1.68353744137604	0.167564440174562	0.999772751739274	-4.81951364693579
Q9BQ49	SMIM7	0.275648520824091	3.2869158802664	1.14156868557388	0.317337234575343	0.999772751739274	-4.81961841740183
A6NHQ4	C17orf96; EPOP	0.122648649404137	3.33472040452306	0.768365472589914	0.485124883215989	0.999772751739274	-4.81973694751395
P62072	TIMM10	0.287945646637422	3.2744626652185	1.48904928047485	0.210715163553518	0.999772751739274	-4.82032283709241
Q9NX01	TXNL4B	0.117771303370221	3.29206720461452	1.17007270404854	0.306935641503605	0.999772751739274	-4.8203813276586
P83369	LSM11	-0.114604336949135	3.32065411365423	-1.12633250376394	0.323029695115579	0.999772751739274	-4.82130506693828
Q8NE00	TMEM104	0.218014118508734	3.28880085244847	1.16346002074099	0.309320162581848	0.999772751739274	-4.82157419142089
Q96P71-1	NECAB3	0.140414401895719	3.37994017390636	0.75206991020158	0.493846616019623	0.999772751739274	-4.82308637740398
Q6UB99	ANKRD11	0.0635439965189012	3.32887635055306	1.97464012654413	0.119538955365648	0.999772751739274	-4.82340369844154
Q0D2K2	KLHL30	0.105948246308636	3.35257613396004	0.526491806476344	0.626392100897701	0.999772751739274	-4.82346255949926
Q9H2S9	IKZF4	-0.124727134994939	3.34205429464551	-0.748657140196511	0.495688139074851	0.999772751739274	-4.82358900926917
Q8NHQ1-1	CEP70	-0.115252647593182	3.339020222498	-1.2960074558361	0.264700919210464	0.999772751739274	-4.8236796837822
Q86TG7-1	PEG10	-0.131837644794507	3.3544279514483	-1.61537895688961	0.181537972501333	0.999772751739274	-4.82424268554062
Q9NS00-1	C1GALT1	0.104861950844822	3.33382875434098	1.19137445174244	0.299370286693128	0.999772751739274	-4.82649946686804
Q8IW92	GLB1L2	0.152170767362829	3.27166418735502	1.04162677240788	0.356404224898968	0.999772751739274	-4.82670795744061
Q9HD33-1	MRPL47	0.0752765783623829	3.29758892047047	1.77581228950239	0.150423083534846	0.999772751739274	-4.82730480817165
Q96IK5	GMCL1	0.12398954153482	3.30383988131559	0.672161281160387	0.538312672094438	0.999772751739274	-4.82759764592513
Q96K17-1	BTF3L4	-0.125437453169325	3.33926317614019	-1.73958268643475	0.156920936222186	0.999772751739274	-4.82813230971444
Q8N961-1	ABTB2	0.126709541705898	3.30493342167546	0.864782535659234	0.435941943443855	0.999772751739274	-4.8286814133471
O94850	DDN	-0.123833135933864	3.37136700759362	-0.573086872395098	0.597266108581891	0.999772751739274	-4.82870006510573
Q9ULJ1-2	ODF2L	0.102339746079718	3.3242623743308	1.28308777716055	0.26876402706145	0.999772751739274	-4.82889647838163
Q13158	FADD	-0.104087976604106	3.29136103939675	-1.29781299500038	0.264137844686079	0.999772751739274	-4.82943877231381
Q9UQ16	DNM3	0.106122639333786	3.3219435035451	1.2727120697669	0.272070553686703	0.999772751739274	-4.83077431026728
Q3KP66-1	C1orf106	0.129384815583831	3.30996088854192	1.18461573753666	0.301751570980374	0.999772751739274	-4.83102385647223
Q6IQ21	ZNF770	0.106450799211702	3.31304844463183	1.28383106301737	0.268528648321529	0.999772751739274	-4.83104358519712
P28799	GRN	0.0918866108468934	3.33416413099001	1.52821057337016	0.201189427328742	0.999772751739274	-4.83116600195468
O94827-6	PLEKHG5	-0.0983578833791674	3.30323344586575	-0.330499963857023	0.757610008114265	0.999772751739274	-4.83122181462701
Q9H6A9-1	PCNXL3; PCNX3	0.155861001571531	3.32628691625884	0.943685264447493	0.398768292705414	0.999772751739274	-4.83141739278348
Q92539	LPIN2	-0.122137645021878	3.31587314404936	-1.05953758571736	0.349099441519633	0.999772751739274	-4.83166008115085
Q6ZUJ8	PIK3AP1	0.0585099038562313	3.35049466044661	0.256370249237986	0.810311575413529	0.999772751739274	-4.83190834552911
Q9NRC1-1	ST7	0.194310733056856	3.34681301977567	1.37182219497622	0.242035088736064	0.999772751739274	-4.83191498192344
Q13439-5	GOLGA4	-0.125967254495214	3.28539300843898	-0.737908372935033	0.501521890598521	0.999772751739274	-4.83193947446296
Q6P6C2-2	ALKBH5	0.0863203822249007	3.32399648466369	1.76844502869117	0.151720878939749	0.999772751739274	-4.83343290292434
P11474-1	ESRRA	0.150172958499923	3.31186325151487	1.02133374600151	0.364844046321446	0.999772751739274	-4.83358043972006
Q8TBZ5	ZNF502	-0.0175301267231645	3.30824486565543	-0.0752998285048514	0.943592047384846	0.999772751739274	-4.83362013486847
Q8TEB9	RHBDD1	0.0323938585875386	3.36413842951797	0.125076528618995	0.906497600867533	0.999772751739274	-4.83427715384807
Q9H1B5	XYLT2	0.022249755561241	3.32616272472861	0.0928898288893914	0.930457958248324	0.999772751739274	-4.83463185185775
Q66LE6	PPP2R2D	-0.267301813078633	3.3322248289936	-1.52600291053141	0.201714573222356	0.999772751739274	-4.8362224451175
Q9NR33	POLE4	0.115023049231129	3.31112180742565	0.678971424922528	0.534414101435342	0.999772751739274	-4.83628147386996
P38435-1	GGCX	0.19582632507364	3.31678383985536	1.03404192562987	0.3595383390635	0.999772751739274	-4.8364227042412
Q16799-3	RTN1	0.173592788910458	3.34009123726065	0.917245539154286	0.410918647428607	0.999772751739274	-4.83656553869936
O43294-1	TGFB1I1	0.00207674120115467	3.28822519919578	0.00878463514394661	0.993411665191547	0.999772751739274	-4.83702065021542
Q96MP8	KCTD7	-0.122902966824653	3.32977830666048	-0.805767873017188	0.465553408330814	0.999772751739274	-4.8376495459181
Q8N3V7-2	SYNPO	-0.107278606372669	3.29019223335406	-0.567579900532477	0.600663023083867	0.999772751739274	-4.83853317229837
Q9H777	ELAC1	-0.0325039159838799	3.33370800981924	-0.106420013525584	0.920373182797318	0.999772751739274	-4.83862215144435
P30039	PBLD	0.107033637656347	3.34193225020849	0.481370354032726	0.655404635950785	0.999772751739274	-4.83864165755054
Q9BV35-3	SLC25A23	0.0326428374005451	3.29307268980067	0.145506520111374	0.891349402829636	0.999772751739274	-4.83962558403066
Q5RL73-2	RBM48	0.117857649048964	3.32140753919642	0.639861299201253	0.557075900899442	0.999772751739274	-4.83980237478473
Q15772	SPEG	0.000720168387455932	3.33319889425456	0.00317610260900001	0.9976179409305	0.999772751739274	-4.84054243188126
P60484-2	PTEN	0.0935968960512645	3.30626519484841	1.43415524310755	0.224841651805219	0.999772751739274	-4.84074562323359
Q6N022	TENM4	0.102756378766898	3.33155085683418	1.67487317376362	0.169276527460335	0.999772751739274	-4.84091427363828
Q9NQ86	TRIM36	-0.138950031925679	3.33268819580666	-0.723431729050257	0.509459680651859	0.999772751739274	-4.84100961916625
O60783	MRPS14	-0.23238830072453	3.31199749860145	-1.15570860283905	0.31213720654292	0.999772751739274	-4.84104093372957
Q86U06-2	RBM23	0.125376691958231	3.31319540199673	1.18189090372222	0.302716610245277	0.999772751739274	-4.84118382359119
Q8IX90	SKA3	0.110348372734866	3.3163697601203	1.5860313994579	0.187923089737863	0.999772751739274	-4.84173885771049
Q9C0D4	ZNF518B	-0.00744804551967521	3.28412514724081	-0.0315649121838178	0.976331356637802	0.999772751739274	-4.84200580635537
Q719H9	KCTD1	-0.161363944885608	3.34322130467796	-1.12728381416499	0.322671544961316	0.999772751739274	-4.84202714781827
Q8WW01	TSEN15	-0.122830636903725	3.32444342203913	-1.03968625524201	0.357203748598101	0.999772751739274	-4.84227777528161
Q9UBW7	ZMYM2	-0.057525616198703	3.31710347878912	-2.26079758735623	0.086609979368073	0.999772751739274	-4.84345418118267
Q96EW2-1	HSPBAP1	-0.0987075310145595	3.34523526553957	-1.52049692593339	0.203030409597257	0.999772751739274	-4.84366482236926
Q86YD5	LDLRAD3	0.132001721256044	3.30217472619378	0.709706744963833	0.517070677853955	0.999772751739274	-4.84374164087782
P49796-3	RGS3	0.111439678406527	3.2824562345208	0.607665781840528	0.576221141310455	0.999772751739274	-4.84436660642639
Q8N5I4	DHRSX	-0.13458300918798	3.3738453196291	-0.760997984365224	0.489053504007605	0.999772751739274	-4.8446121169413
Q9BVM4	GGACT	-0.118606813065427	3.28925103370901	-0.870183419634552	0.433309491762375	0.999772751739274	-4.84461459880457
Q16394	EXT1	-0.175150148334894	3.30469054916485	-0.693082326156007	0.526400301554395	0.999772751739274	-4.84632047522758
O15118	NPC1	0.11866334991283	3.30772972408643	1.19989334359785	0.296393939977605	0.999772751739274	-4.84690980189336
Q5CZA5	ZNF805	0.0489228241838564	3.40455962294426	0.220225679315193	0.836479554553564	0.999772751739274	-4.84691192467193
O75173	ADAMTS4	-0.132208296104996	3.3225561829269	-0.76763135495202	0.485515259351671	0.999772751739274	-4.84746491486906
P49643-1	PRIM2	-0.0843835119969078	3.32308389884711	-1.82312666190582	0.142365510866311	0.999772751739274	-4.84820866098941
Q6P2E9-1	EDC4	-0.0610566354256698	3.32250922281423	-2.26336335941703	0.0863646182384454	0.999772751739274	-4.84868174176568
P17029	ZKSCAN1	-0.107267969593507	3.35181981073443	-1.41367384978478	0.230352610908074	0.999772751739274	-4.84916358593662
O75071	EFCAB14; KIAA0494	0.130409956018215	3.305453011964	0.700203739753043	0.522388940782167	0.999772751739274	-4.84930859423822
Q14587-1	ZNF268	-0.0322112525711195	3.37517370525577	-0.138841019234399	0.896285888269267	0.999772751739274	-4.84935000049456
Q5T6S3-2	PHF19	-0.104761205017027	3.34277590779132	-0.596082867915397	0.583215488451363	0.999772751739274	-4.85012477309739
P54253	ATXN1	0.117001827013442	3.31659903633519	0.831183350908556	0.452610381834032	0.999772751739274	-4.85031583644338
O00391	QSOX1	-0.0984766983349861	3.33787259397511	-0.476587982150756	0.658524593601221	0.999772751739274	-4.85049991812592
Q01974	ROR2	0.149179901651282	3.33383058495724	1.0700564763895	0.344871957004935	0.999772751739274	-4.85192880257912
Q5T5D7	ZNF684	0.048594680765837	3.30429667185386	0.173406336265332	0.870754313560677	0.999772751739274	-4.85229961811036
Q8N9Z2-1	CCDC71L	-0.115830522972935	3.31903024381967	-0.637895327981147	0.558232385506735	0.999772751739274	-4.85294925913777
Q9BQA9-1	C17orf62	0.177525328054294	3.34615162573629	0.90690427826675	0.415754691769712	0.999772751739274	-4.85340025872048
Q8N3T6	TMEM132C	-0.101171858278046	3.33274319994256	-0.536689315213617	0.619943955444508	0.999772751739274	-4.85373501472521
Q9Y3A3-3	MOB4	-0.0796379203208488	3.32528983843123	-1.7209877674375	0.16037092291944	0.999772751739274	-4.85392487334065
Q9BXS9-1	SLC26A6	0.161689265221979	3.32803078761828	0.990962293660487	0.377803279202134	0.999772751739274	-4.8541107273409
Q9H892-2	TTC12	-0.0586682480311727	3.3471192139762	-0.2715396500173	0.799415404200683	0.999772751739274	-4.85516366904184
Q9UKA2	FBXL4	0.120008883500139	3.32354257737635	1.02622386899158	0.362794291266212	0.999772751739274	-4.85543601138876
Q9BQC6	MRP63; MRPL57	-0.107914390446167	3.30505885490072	-1.34634031353044	0.24943284007255	0.999772751739274	-4.85617500928407
Q96FV0	LRRC46	-0.0613933794426996	3.31586599185768	-0.299024639360853	0.779814751327328	0.999772751739274	-4.85627045574282
Q9BYB4-1	GNB1L	-0.0844109722728814	3.31910951678618	-1.7369087003292	0.157412178442632	0.999772751739274	-4.85666026527371
P48454-3	PPP3CC	-0.112328836994575	3.33322020970541	-0.93473149301535	0.402848608777984	0.999772751739274	-4.85704785918763
Q5FWE3-1	PRRT3	0.112277471724018	3.35292618551015	0.535115344493667	0.62093655080901	0.999772751739274	-4.85717146417881
Q969G6	RFK	-0.0799090960460006	3.33243325039511	-1.67613772044147	0.16902550945517	0.999772751739274	-4.85781462868572
O60296	TRAK2	-0.136412047440443	3.35095396190857	-0.882517043658554	0.427346561902237	0.999772751739274	-4.85819678294982
Q9Y2B1	TMEM5	-0.00462332230142906	3.28486564613957	-0.018779828395656	0.985916239675716	0.999772751739274	-4.85821417679207
O76054	SEC14L2	-0.103794756245181	3.31681970375406	-1.10776789837455	0.330092108747713	0.999772751739274	-4.85894638762339
Q8IWY8-1	ZSCAN29	-0.0901714825959159	3.35738281179229	-1.44199339711196	0.222767698496611	0.999772751739274	-4.85896897095399
Q53H96	PYCRL; PYCR3	-0.287123859327044	3.29048443377568	-0.866810401597825	0.434952017346536	0.999772751739274	-4.85917354654288
P24278	ZBTB25	-0.0904993423349427	3.34606323669795	-0.467671518037191	0.664364029722151	0.999772751739274	-4.85972948639464
Q32MZ4-4	LRRFIP1	0.0765583217128841	3.31858580549958	1.63191280505739	0.178040234191924	0.999772751739274	-4.86012598514119
Q5TID7	C1orf114; CCDC181	-0.109039516993135	3.31389298884745	-0.684984053544341	0.530988829271458	0.999772751739274	-4.86025584023077
Q9HB19	PLEKHA2	-0.10698326311015	3.36001156603587	-1.08043037643239	0.340747787931636	0.999772751739274	-4.86045636354832
Q8N3E9	PLCD3	0.11128048561845	3.33889560023143	1.0093877948484	0.369894170389284	0.999772751739274	-4.86109179722524
Q9NY65	TUBA8; EHHADH	0.113746573818225	3.32559113757626	0.606441817583747	0.576957588940294	0.999772751739274	-4.86116812492553
P46781	RPS9	-0.0720221936555287	3.31567782467956	-2.04790054250875	0.10995835945859	0.999772751739274	-4.86146921308406
Q4G148-1	GXYLT1	0.135017984136558	3.31197580529327	1.2569629206301	0.277164266009291	0.999772751739274	-4.8615720276186
Q8TE69-1	CXorf40A	-0.118230342043224	3.3062575606268	-1.03686526250394	0.358368876446629	0.999772751739274	-4.86163992305807
Q8N5J2-3	FAM63A; MINDY1	-0.0325158897256584	3.34530784050588	-0.126217024021423	0.905650616052679	0.999772751739274	-4.86245407796141
O75197	LRP5	0.114624541164208	3.33150343144097	0.720187794817905	0.511251072994382	0.999772751739274	-4.86279927241644
Q8TF61	FBXO41	0.129867993823204	3.26631835147407	0.352929367274632	0.741955983431082	0.999772751739274	-4.86309109346269
P13987	CD59	0.227099928355729	3.29576992676657	1.17876312812488	0.303827912260433	0.999772751739274	-4.86372770076108
Q5T2R2-1	PDSS1	0.0858829206119437	3.29616434037213	1.46826413842082	0.215955645920487	0.999772751739274	-4.86386577097402
Q8NEH6	MNS1	-0.0384234064269574	3.35464916735523	-0.154209180132183	0.884913187870035	0.999772751739274	-4.86410817316963
Q96LL9	DNAJC30	-0.103022868505422	3.3478108915649	-0.614995070384041	0.571824305394857	0.999772751739274	-4.86432609423261
Q9UK80-1	USP21	-0.125366044220771	3.34398583460932	-0.769851991561478	0.484335142720775	0.999772751739274	-4.86439815409893
O94925-3	GLS	0.123120600104225	3.28928453055389	1.49172833920414	0.210049131308831	0.999772751739274	-4.86450954384876
Q8ND25-1	ZNRF1	0.123282926636923	3.32328400775799	0.818818243235601	0.458871400800419	0.999772751739274	-4.86460187651663
P19387	POLR2C	0.0832417758536553	3.32678817966127	1.68807776771425	0.166674525164829	0.999772751739274	-4.86477706681417
Q8WWB7	C1orf85; GLMP	0.0528374013417035	3.35062813040791	0.257724037132427	0.809336987124222	0.999772751739274	-4.86531036867545
Q5TAP6	UTP14C	-0.0872519806874671	3.28925476896418	-0.4006594316291	0.709150680830776	0.999772751739274	-4.86693052169749
P0CK96	SLC35E2B	0.119561994883506	3.30702733678956	0.619215708069938	0.569302583662483	0.999772751739274	-4.86729699250889
Q9Y426	C2CD2	0.0201694864297996	3.37051047168205	0.0855561477910676	0.935930902588471	0.999772751739274	-4.86770161091128
Q96PD2-2	DCBLD2	0.168274999276333	3.33842643500995	1.3102236716752	0.260298738788324	0.999772751739274	-4.86775051986322
Q8N6I1-1	EID2	-0.15019695380394	3.33242653505795	-0.992223754647838	0.377257147360899	0.999772751739274	-4.8677986919504
Q9ULQ0-1	STRIP2	-0.10352226334187	3.31236546799557	-0.632439742096184	0.561450259108233	0.999772751739274	-4.86841724533828
P43307	SSR1	0.262337765970676	3.33739840415019	1.4064327473273	0.232333060899327	0.999772751739274	-4.86855295722601
P50219	MNX1	-0.0585245736874009	3.32830471206163	-0.262763047468368	0.805713106217372	0.999772751739274	-4.86890564506405
Q9NQ69-4	LHX9	0.109679492322482	3.31024218172725	0.802965663423347	0.466998098047973	0.999772751739274	-4.86975696314697
O94983-6	CAMTA2	0.018616758080759	3.34073967404479	0.0866498753267775	0.935114400080805	0.999772751739274	-4.87132322912703
Q4AE62	GTDC1	0.164768680689688	3.26387035854433	1.12801753691142	0.322395561152865	0.999772751739274	-4.87140617767982
Q5EBL2	ZNF628	-0.0977233299251023	3.39675794952025	-0.516107521885474	0.633000065727112	0.999772751739274	-4.87179230620243
Q8TAP9	MPLKIP	-0.116953973744854	3.35241207503256	-0.87168394892062	0.432580419802439	0.999772751739274	-4.8718838195019
Q9BSF8-2	BTBD10	-0.10704575881949	3.33601296956079	-1.16782919723037	0.307742723186516	0.999772751739274	-4.87196163603351
P53396-2	ACLY	0.112804227067349	3.30463607953142	1.23115463607743	0.28570898459819	0.999772751739274	-4.87218184939022
Q6UN15-1	FIP1L1	0.0893605134006671	3.35187219816301	0.468793016526574	0.663627957000004	0.999772751739274	-4.87264425136987
Q9HAV5-2	EDA2R	0.121795273595986	3.34212098668899	0.684887787049938	0.53104354639482	0.999772751739274	-4.87314780685804
Q8WXB1-1	METTL21A	-0.122090333228465	3.32514574284942	-1.26212779840274	0.2754838102517	0.999772751739274	-4.87316334657437
Q7Z3D4	LYSMD3	-0.133133087607199	3.34259434384646	-0.705509224499532	0.51941489400897	0.999772751739274	-4.87330648454601
P41440	SLC19A1	0.137716253166254	3.31189536218398	1.1899721011249	0.299862922237068	0.999772751739274	-4.8738949679111
P31273	HOXC8	-0.111710588456892	3.34919249360045	-1.16200658467607	0.309846571320049	0.999772751739274	-4.87390634141469
O95198-2	KLHL2	0.0063846212572728	3.39366489000124	0.0276760565320454	0.979246381542398	0.999772751739274	-4.87414814528336
O43570	CA12	-0.0219734997867933	3.39065781043138	-0.100487552719854	0.924792872388156	0.999772751739274	-4.87457535347021
Q96S99	PLEKHF1	0.079043797533389	3.34633244942684	0.404931888766868	0.706249554127626	0.999772751739274	-4.87491475310899
Q969W1	ZDHHC16	0.106620711399679	3.27142496984073	0.573838437875645	0.59680347114408	0.999772751739274	-4.87518225741476
Q9BSR8	YIPF4	0.172361669529745	3.28889694101659	1.18460261929961	0.301756210094274	0.999772751739274	-4.875225601996
Q9Y2K2	SIK3	-0.131895940969269	3.38770466394227	-0.856408737162126	0.440049093668061	0.999772751739274	-4.87543167368986
Q9NP80-1	PNPLA8	-0.00586289531585222	3.30293163376656	-0.0193963745865484	0.985453937827659	0.999772751739274	-4.87555504522109
Q9H1I8-1	ASCC2	0.082947444255344	3.31439051917662	1.74629823403351	0.155694359359084	0.999772751739274	-4.87596420232289
Q9H902-3	REEP1	0.147861207371819	3.35595122696119	1.27854135614561	0.270208089744194	0.999772751739274	-4.87603418150655
Q86XJ1	GAS2L3	0.12060413865658	3.34085700563004	0.529927439715593	0.624215106171283	0.999772751739274	-4.87629344231088
P63302	SEPW1; SELENOW	0.128986964857245	3.29431045912572	1.47874342158109	0.213297272805376	0.999772751739274	-4.87726728667561
O14561	NDUFAB1	0.300002252600053	3.18630845724132	1.52087968026419	0.20293865525624	0.999772751739274	-4.87747140009619
Q92800-2	EZH1	0.0639921085222096	3.33402553238445	0.303046545880766	0.776962638733927	0.999772751739274	-4.8777990334952
Q8N490	PNKD	0.0155665302353682	3.37590932144826	0.0641099035206646	0.951958959879366	0.999772751739274	-4.87788324718134
Q9NRJ7	PCDHB16	-0.104115156766032	3.31095086265276	-0.615808953936522	0.571337447801385	0.999772751739274	-4.87788544809568
Q16587-5	ZNF74	0.112616892604428	3.34684401526475	0.980421431184058	0.382393629027435	0.999772751739274	-4.87853282093244
O14907	TAX1BP3	0.118815516167663	3.29503411724973	1.27587793990146	0.271057527752856	0.999772751739274	-4.87885476540504
Q96C45	ULK4	0.0702692545117452	3.29873312541627	0.334394347192041	0.754881629595968	0.999772751739274	-4.87980507552621
Q8WVC6-1	DCAKD	0.184655928415416	3.34479949061309	1.06593420763782	0.346523180336515	0.999772751739274	-4.88010679883262
Q9NZ08-2	ERAP1	0.0870639152725684	3.31441178142019	1.61417003106482	0.181796506026981	0.999772751739274	-4.88101152043442
Q96JN2-4	CCDC136	0.104560431241701	3.34867885858711	0.60797813983053	0.576033298815626	0.999772751739274	-4.88150146390036
P15336-1	ATF2	0.0870120935155703	3.2950901709418	1.49979095218372	0.208057565019133	0.999772751739274	-4.88187333598389
P07093-3	SERPINE2	0.116484608227121	3.35601959986414	0.762513409136944	0.488243451095694	0.999772751739274	-4.88188777582027
Q8NB25-1	FAM184A	-0.0684108757358275	3.3811390889778	-0.357166866814687	0.739015091498706	0.999772751739274	-4.88218433631196
Q8TET4	GANC	-0.111982128802801	3.32786554770362	-0.945245351315784	0.398060939637345	0.999772751739274	-4.88221659495856
Q5H8A4-1	PIGG	0.090148045515086	3.33572106267104	0.527613866727419	0.625680598010893	0.999772751739274	-4.88290481251261
Q96S21	RAB40C	0.0418769570548496	3.27254299695249	0.201569390829773	0.850089945976519	0.999772751739274	-4.88300244321011
Q9NSD4	ZNF275	0.00679556126044624	3.34799902882117	0.0314301450018262	0.976432368831356	0.999772751739274	-4.88342754653307
Q6Y2X3	DNAJC14	0.137486045406233	3.28650783266925	0.86079999176359	0.437891394235764	0.999772751739274	-4.88364029928643
Q9NXS2	QPCTL	0.133952103030733	3.37507590643448	0.949295688943028	0.396229461999293	0.999772751739274	-4.88392899960728
Q6NX49	ZNF544	-0.121813557259878	3.35284344679904	-0.794023230162985	0.471631831212598	0.999772751739274	-4.8842887644368
Q9Y6N8	CDH10	-0.0245206355722654	3.33183633344171	-0.116034674176447	0.913217717059098	0.999772751739274	-4.88431910484989
Q86TH1	ADAMTSL2	-0.0818227130003995	3.39790061930098	-0.334439798344165	0.754849812235063	0.999772751739274	-4.88474343146471
Q9BYV9	BACH2	0.102234705767307	3.34189792785136	0.639702725187841	0.557169121130366	0.999772751739274	-4.88528606521311
Q96HA4-1	C1orf159	0.113123578298061	3.30921325368883	0.692283033645831	0.526851912256039	0.999772751739274	-4.88537935157266
O95260	ATE1	0.00026606044790878	3.32690225823346	0.00113269240718142	0.999150485515451	0.999772751739274	-4.88542965982901
O95551-2	TDP2	-0.105622372580873	3.31413168034401	-1.48311487373124	0.212198126733569	0.999772751739274	-4.88545288402597
P51843	NR0B1	-0.0604010418342821	3.33128004425289	-0.305282212997682	0.775379060348132	0.999772751739274	-4.88548198051309
P20839-6	IMPDH1	-0.0878306795273937	3.33971050616132	-2.06397018089203	0.107971615711166	0.999772751739274	-4.88575028501322
Q96SK3	ZNF607	0.118318769596366	3.39105747392094	0.585030930310546	0.589941102644226	0.999772751739274	-4.88606271305605
Q9NRF9	POLE3	0.148970564647771	3.29200938689269	1.06869306508217	0.345417305004815	0.999772751739274	-4.88627997800769
Q8N0T1	C8orf59	-0.10177037334343	3.31611955756408	-1.60203363562665	0.184413181358572	0.999772751739274	-4.88639330344906
P02545	LMNA	-0.137517200058997	3.35831768307306	-1.47837907438056	0.21338914285247	0.999772751739274	-4.88652940170391
P61803	DAD1	0.26747859368339	3.34588849362318	1.13939688651767	0.318142971707397	0.999772751739274	-4.88685351442038
Q9HB90	RRAGC	0.0954878626246258	3.30520772304527	1.43410095946752	0.22485608235109	0.999772751739274	-4.88708315623335
O43903	GAS2	-0.176634477394554	3.33718195301552	-0.873448146633677	0.431724517882601	0.999772751739274	-4.8880075356027
Q6UX15-2	LAYN	0.121710323179395	3.30917405573333	0.80343629034204	0.466755219761323	0.999772751739274	-4.88812364723595
Q14204	DYNC1H1	0.0240681300276546	3.30539844363794	2.98139451900716	0.0406872869395967	0.999772751739274	-4.88829967286031
P51178-2	PLCD1	0.0695404985767106	3.30206540482751	0.370327677560267	0.729915849094276	0.999772751739274	-4.88830004869008
O60347	TBC1D12	-0.112094611095235	3.3383482136671	-0.935702082064073	0.40240460364302	0.999772751739274	-4.88848226201289
P30926-1	CHRNB4	0.10038076390973	3.33655405747813	0.422281965346519	0.694530676136116	0.999772751739274	-4.8885304403602
O14972	DSCR3	-0.112767558805144	3.29833273998132	-1.2799750629122	0.269751901973026	0.999772751739274	-4.88869493795362
Q9Y5Q0	FADS3	0.0802235174176357	3.37375473321259	0.44270450468756	0.680867829756355	0.999772751739274	-4.88892698972728
Q96CN7	ISOC1	0.0776672352022167	3.29748764749211	1.60938308586852	0.182823970414039	0.999772751739274	-4.88907402714116
Q9HCN8	SDF2L1	-0.0811362754755291	3.31948770296761	-1.64478646892278	0.175365416917725	0.999772751739274	-4.88965821500112
Q96BD5-2	PHF21A	0.117636148432161	3.31003202923024	0.671258394293457	0.538831053432252	0.999772751739274	-4.88996349829407
Q6QNY0	BLOC1S3	-0.119282591575662	3.35187536885184	-1.02353176579942	0.363921461769352	0.999772751739274	-4.89004682479958
P54252	ATXN3	0.0955369998383451	3.29797615981154	1.28070434914597	0.269520136785159	0.999772751739274	-4.89008312224376
P54803	GALC	0.131582028102667	3.3086533968687	1.07850747218846	0.341508877067551	0.999772751739274	-4.89009109595123
Q9HCM4-4	EPB41L5	0.0766693749702384	3.31008336314624	1.48635566087337	0.211386973386827	0.999772751739274	-4.89010520130517
P42229	STAT5A	-0.134537557508004	3.31127760675071	-0.800352127377558	0.468348674055909	0.999772751739274	-4.89027347720526
Q8WVD3-1	RNF138	-0.0989149825223346	3.30189753607847	-1.215738179886	0.29093193908975	0.999772751739274	-4.890350433824
Q6ZN04-1	MEX3B	0.125579789566096	3.32497248515392	1.17969124780211	0.303497753416445	0.999772751739274	-4.89041953165646
Q9UNH5-2	CDC14A	0.0967036138393104	3.23300134296848	0.56725705962297	0.600862546303799	0.999772751739274	-4.89113318635879
Q9Y252	RNF6	-0.104885040133089	3.31164006432897	-0.883850892490528	0.426705735184866	0.999772751739274	-4.89170234350078
Q9BXP2-1	SLC12A9	0.0938599580076567	3.34042012876168	0.396708612936559	0.711838723076091	0.999772751739274	-4.89301365918714
Q6IQ49-1	SDE2	-0.0951396913866691	3.3284721016716	-1.87633842139135	0.133852839755709	0.999772751739274	-4.8930632607265
O95235	KIF20A	0.0556525003246696	3.32447416480877	2.06452005578384	0.107904336130075	0.999772751739274	-4.89322997191317
Q9UNL4-1	ING4	-0.20333909604716	3.3413544352906	-1.25976793912665	0.276250405264627	0.999772751739274	-4.89324644035436
Q6PJW8	CNST	0.0904082353071599	3.35600774345475	1.50100667944602	0.2077589326346	0.999772751739274	-4.89342301543142
Q8ND23-1	LRRC16B; CARMIL3	0.0547454664172774	3.29374758911688	0.28025436647149	0.793180307934314	0.999772751739274	-4.89348103503038
P07203	GPX1	0.0684370154406281	3.29181050989026	1.6821318088726	0.167840958020048	0.999772751739274	-4.89367666905189
Q99418	CYTH2	0.108181534070523	3.30510120907154	0.93021893233816	0.404918353734903	0.999772751739274	-4.8944650561744
Q86XI8	C19orf68; ZSWIM9	0.106527986719296	3.3198542241247	0.869114729417895	0.433829353729598	0.999772751739274	-4.89452384704612
Q8IUH4	ZDHHC13	0.105957683097183	3.31062909576418	0.660465829930917	0.54505476615638	0.999772751739274	-4.89474310882788
Q96EM0	L3HYPDH	0.034658026358047	3.29945201956589	0.176883927121014	0.86819547844364	0.999772751739274	-4.89487406457391
O76050-2	NEURL; NEURL1	-0.0129722730342507	3.33698324328207	-0.0607276916868801	0.954489437046377	0.999772751739274	-4.89495239023907
Q6N075-2	MFSD5	0.150994071612938	3.35170988031284	0.805332588137784	0.465777591233033	0.999772751739274	-4.89503960655817
Q8IUW5	RELL1	0.11180804801642	3.29702343638769	0.577057102549815	0.594824781425992	0.999772751739274	-4.89504060746144
O43361	ZNF749	-0.115083556875754	3.38080235635655	-0.886508582281219	0.425431243643199	0.999772751739274	-4.89592308580424
P02458-2	COL2A1	0.199611413950703	3.28271421504765	0.873055967188296	0.431914664454825	0.999772751739274	-4.89695593663768
Q6UXG2-1	KIAA1324	0.110298752556079	3.34022293380163	0.796162659314139	0.470519989213226	0.999772751739274	-4.89724705896383
Q96NE9-1	FRMD6	0.118295361123002	3.31390060250793	1.096799867332	0.334330439980807	0.999772751739274	-4.89748085203631
Q9UMX3	BOK	-0.00681124421306413	3.32729597685821	-0.0330750733610514	0.975199481132098	0.999772751739274	-4.89749278222825
Q330K2-1	NDUFAF6	-0.171473314404297	3.29759874356251	-1.29445013028752	0.265187518548714	0.999772751739274	-4.89770490178535
Q9H992	MARCH7	0.0986300072356121	3.35231200341372	0.650058531441628	0.551103857872627	0.999772751739274	-4.89858361786917
Q6PI77	BHLHB9; ARMCX5-GPRASP2	-0.0002006955008759	3.35981404256302	-0.000971539047570451	0.999271349797799	0.999772751739274	-4.89872892687022
Q96EK2-3	PHF21B	-0.0884416871417749	3.38469203844021	-0.456102108142788	0.671983964445119	0.999772751739274	-4.89875569722541
P50750-2	CDK9	-0.201535562924551	3.33436715395463	-1.22926265506363	0.286345153779354	0.999772751739274	-4.89903096775153
Q96FE5	LINGO1	0.117370612475986	3.33196553488859	0.81733726057978	0.459625865413879	0.999772751739274	-4.89921014505849
P06744	GPI	0.0454856947591738	3.32789190791917	2.54274057458049	0.0638004171208279	0.999772751739274	-4.8993979506253
P17014-1	ZNF12	0.0623309264860243	3.43314142867627	0.211582266481944	0.842776976688668	0.999772751739274	-4.89964492618273
Q8NBM4-1	UBAC2	0.153606436534996	3.34405783659852	1.26428994309126	0.274783231905428	0.999772751739274	-4.89997389409744
Q9P2I0	CPSF2	0.0707712363169161	3.31694739509467	1.95777527916741	0.121871462532701	0.999772751739274	-4.90042794589641
Q9Y4E5-4	ZNF451	-0.123533856268403	3.35202367784758	-1.00754748483916	0.370677574899729	0.999772751739274	-4.90072677441493
Q96DN5-1	WDR67; TBC1D31	-0.110853019603005	3.31184325367944	-0.818531437510725	0.459017433291501	0.999772751739274	-4.90078220424445
Q13438-1	OS9	-0.105643544269192	3.35902141272065	-1.15666927371146	0.311786789827559	0.999772751739274	-4.90230857745139
O43861-1	ATP9B	-0.0805998300899076	3.30688755914257	-0.398865099113869	0.710370870609855	0.999772751739274	-4.90305182122129
O15265-2	ATXN7	-0.0759852960507561	3.33385455466863	-0.413657531798018	0.700343333853745	0.999772751739274	-4.90334279364482
P30305-1	CDC25B	0.112874408256691	3.28936518427544	1.37906789724508	0.239971323653276	0.999772751739274	-4.90343734107888
Q969S8-1	HDAC10	-0.078762197531194	3.30889574216143	-0.374994773260901	0.726701829714294	0.999772751739274	-4.90383223374919
Q9UBV7	B4GALT7	0.104137164461183	3.33977547157679	0.596268171379066	0.583103153548632	0.999772751739274	-4.9048163823237
Q8IWP9	CCDC28A	0.0869816829814664	3.33081328315345	0.529132600750371	0.624718346614335	0.999772751739274	-4.90497492277649
Q96GZ6-9	SLC41A3	-0.0507956786139914	3.36662071961108	-0.166409828308821	0.875908157272012	0.999772751739274	-4.90511633292433
Q6ZTN6-3	ANKRD13D	-0.111053962613806	3.33275135827693	-0.825905924327865	0.455274238395336	0.999772751739274	-4.90554846023944
Q9C0C7-1	AMBRA1	-0.0575630008304656	3.32060080877467	-0.313872216951162	0.769306895938389	0.999772751739274	-4.90555634142309
Q7Z699	SPRED1	-0.0602649197425182	3.32769445655853	-0.298623609714979	0.780099370160713	0.999772751739274	-4.90599546581655
P56134	ATP5J2	0.0747537456723599	3.32978922614864	0.276950935995956	0.795541638417784	0.999772751739274	-4.90615732169663
Q9UGK8	SERGEF	0.109510006213462	3.32812954378746	0.875711005064798	0.430628715512944	0.999772751739274	-4.90682336777031
O00255-1	MEN1	0.0908455753254928	3.33819110281428	1.49063299557061	0.210321182933791	0.999772751739274	-4.90738694237723
Q13797	ITGA9	0.150294164978551	3.30980351966346	1.32579127438058	0.255559656887675	0.999772751739274	-4.90740626219219
Q13705-1	ACVR2B	0.127432570434306	3.30380892499975	1.41109692640797	0.231055467989172	0.999772751739274	-4.90770463857515
A7MBM2	DISP2	0.0836739007053719	3.35309469521154	0.487068554661015	0.651698272570819	0.999772751739274	-4.90770726738678
Q9BSW2-2	EFCAB4B; CRACR2A	0.088640496993168	3.32115207258937	1.62601209082827	0.179280419766117	0.999772751739274	-4.90817952304345
Q9P206-2	KIAA1522	0.0293360195362247	3.32422394782015	0.0990923725809258	0.925832767455008	0.999772751739274	-4.90828153781214
P55345-1	PRMT2	-0.0812143085157599	3.34906505135793	-0.488282907024576	0.65090996731741	0.999772751739274	-4.90900174439819
Q7Z3I7	ZNF572	0.225129971294884	3.28238533284945	0.635037102785042	0.559916676279844	0.999772751739274	-4.9109587622818
Q9UQ88-1	CDK11A	0.0472319033072523	3.26625565325491	0.186418122168966	0.861190269803729	0.999772751739274	-4.91185144807354
Q96KS0-1	EGLN2; RAB4B-EGLN2	-0.00474174069235899	3.32340906958994	-0.0178567272892446	0.986608416552862	0.999772751739274	-4.91224758685876
Q07866-6	KLC1	-0.184432781941049	3.36678281286113	-1.1005011683579	0.33289466752194	0.999772751739274	-4.91259551845076
Q14142	TRIM14	0.0669137366412313	3.28921022633434	0.354250816956229	0.741038301394082	0.999772751739274	-4.91261604184748
O43184-1	ADAM12	0.0725936974055515	3.35379156200131	0.397522535879187	0.711284533414568	0.999772751739274	-4.91325234945782
P48029-1	SLC6A8	0.108765380081225	3.310501796948	0.516984031321425	0.632440689840718	0.999772751739274	-4.91342701670898
Q8N4N8	KIF2B	-0.106975500071641	3.37574017429643	-0.771034659076314	0.483707531257207	0.999772751739274	-4.91358166891326
Q8N350	C19orf26; CBARP	0.136151205228904	3.34771482981153	1.16850629077695	0.307498936992261	0.999772751739274	-4.91450107019773
Q9NQ11	ATP13A2	0.138906594261825	3.31736799706244	0.693787619232854	0.526002033563638	0.999772751739274	-4.91464124137305
P55055	NR1H2	-0.165041142909305	3.21903131434477	-0.73435059024629	0.503464099057843	0.999772751739274	-4.91471980068155
P09012	SNRPA	-0.0851684578852997	3.31731955086263	-1.77075212328163	0.151313191186843	0.999772751739274	-4.91490211991159
Q9NTG7	SIRT3	-0.120730485510547	3.30565345273595	-0.770417568541202	0.484034927792991	0.999772751739274	-4.91505306812723
Q5IJ48	CRB2	0.119646856061648	3.31526513950304	1.43854335066342	0.223678198056396	0.999772751739274	-4.91509147957441
Q14774	HLX	0.0866941924204	3.31369897373389	0.538657999883539	0.618703816795767	0.999772751739274	-4.91565028300277
O95199-1	RCBTB2	0.11330937630403	3.29514344647235	0.924687226913179	0.407467751223149	0.999772751739274	-4.91588093903067
Q9ULX9-1	MAFF	-0.18957412051908	3.28140852730333	-0.345471070172839	0.747145091243502	0.999772751739274	-4.91598191013199
Q8WX77	IGFBPL1	0.0934370618415238	3.33620798162221	1.25538034955839	0.277681135192754	0.999772751739274	-4.91647253463734
Q92985-4	IRF7	-0.085184995573431	3.31815591084409	-0.448420127063958	0.677070056206252	0.999772751739274	-4.91682009654538
P19532	TFE3	-0.0544737561094116	3.37477055793016	-0.303811515613567	0.77642064370652	0.999772751739274	-4.91741603959388
O14733-2	MAP2K7	-0.0786689312435428	3.31784516830512	-1.56505384342141	0.192629023611614	0.999772751739274	-4.91849404152725
P09105	HBQ1	-0.0347683651821823	3.32395361096912	-0.185152707824672	0.862119156591223	0.999772751739274	-4.918803641037
Q9NQR1-1	SETD8; KMT5A	-0.147805912574025	3.37066706942805	-0.737481733106679	0.501754499547552	0.999772751739274	-4.91882290388147
Q53SF7-1	COBLL1	0.102704519808635	3.34649804288097	0.760879034105738	0.489117130709088	0.999772751739274	-4.91898905215254
Q6UXD5-5	SEZ6L2	0.117810514087399	3.30681878346791	1.69882599034531	0.16458758936313	0.999772751739274	-4.91902291052229
Q9NV64-1	TMEM39A	-0.065650271448354	3.4068185098777	-0.289767651096283	0.78639516075604	0.999772751739274	-4.91904884115479
Q8TAC9-2	SCAMP5	0.101431697870407	3.33360373449859	0.511935001504364	0.635666971346931	0.999772751739274	-4.91914097818905
P57105	SYNJ2BP	0.128832731005999	3.3358147575849	1.472467164693	0.214885430956399	0.999772751739274	-4.91926598278983
Q56NI9	ESCO2	0.118804012973281	3.31393604068987	1.57092289232745	0.191300302591342	0.999772751739274	-4.91943316847027
Q5T2E6-1	C10orf76	0.0841459928527937	3.31098403966723	1.39714998214054	0.234896703270065	0.999772751739274	-4.91959358993799
Q96H86	ZNF764	0.0933987640748362	3.29008812371984	0.548452183574687	0.612556965000728	0.999772751739274	-4.91990374647963
Q9NXG6-3	P4HTM	-0.0555077429176204	3.30994559120594	-0.30147063521879	0.778079683874502	0.999772751739274	-4.92064575196314
P13473-3	LAMP2	-0.0379571180410569	3.3183517043549	-0.197749914952285	0.852884389373847	0.999772751739274	-4.92103437611569
Q96K62	ZBTB45	-0.104485725434405	3.3394235188158	-0.475632802364923	0.659148751364495	0.999772751739274	-4.92111049413866
Q8NCW5	APOA1BP; NAXE	-0.138137568507707	3.33058651259324	-1.79123199458131	0.147744909837397	0.999772751739274	-4.92143076208583
Q96HE9	PRR11	-0.0691877142167746	3.32531879487821	-1.65064299301716	0.174162483869404	0.999772751739274	-4.92179747352205
Q9NZC3	GDE1	0.103831613359887	3.33807347912813	0.945117067053481	0.398119064324567	0.999772751739274	-4.92224783813891
Q9Y227-1	ENTPD4	0.105853508540464	3.32755657709152	1.03129530068787	0.360679262765392	0.999772751739274	-4.92236337075852
Q8WVZ9	KBTBD7	0.117374894390696	3.28387150058941	1.01001376005544	0.369628032439388	0.999772751739274	-4.92245903450371
Q8IUW3	SPATA2L	-0.0898523429343337	3.28928631072949	-0.602260812380845	0.579477978534518	0.999772751739274	-4.92252876696711
Q5VT25-2	CDC42BPA	0.136735288287313	3.3119500585698	1.19920856602266	0.296632157906421	0.999772751739274	-4.92253344689261
Q9HCJ1	ANKH	0.105367143561027	3.3218328902998	0.638502448264123	0.557875070544995	0.999772751739274	-4.92262727476938
H0Y354	FAM72C	-0.147611770643982	3.23344663115519	-0.500242462760956	0.643175915425566	0.999772751739274	-4.92319105134408
Q96GF1-1	RNF185	-0.0456502690758559	3.37649908498396	-0.181420433535445	0.864860424909739	0.999772751739274	-4.92330742753653
Q96NT0	CCDC115	0.117207431944729	3.33897354785972	0.751061700464133	0.49439010591996	0.999772751739274	-4.92382238911462
Q02833-1	RASSF7	0.122891318758662	3.27218137055097	0.730206475769794	0.505733445343153	0.999772751739274	-4.92402586303986
Q9UN67	PCDHB10	0.0843850105785614	3.36690942985499	0.45294017215243	0.6740748759297	0.999772751739274	-4.92407175498412
Q14188	TFDP2	0.0413280959868179	3.32814631634647	0.219434150634961	0.837055639906637	0.999772751739274	-4.9240736824043
Q9UQR1	ZNF148	-0.0741370872514594	3.34119824319568	-1.76467725625957	0.152389197629295	0.999772751739274	-4.92455152230239
Q6PCB0	VWA1	0.102402031345213	3.3663510917324	0.459563100396768	0.669699398732164	0.999772751739274	-4.92487119778592
Q08AN1	ZNF616	-0.0533445702574828	3.33651298663521	-0.258202139638486	0.808992902188955	0.999772751739274	-4.9253230372453
Q9UIU6	SIX4	0.0141111534906869	3.32049706382049	0.0760165324562092	0.94305644062026	0.999772751739274	-4.92534880306535
Q96EV8-1	DTNBP1	-0.0825042654907601	3.33854851877233	-1.36938495206834	0.242733209245484	0.999772751739274	-4.92563822878042
O43257	ZNHIT1	0.239902332466903	3.22071052152528	0.282831442835445	0.791340042281256	0.999772751739274	-4.92565304267856
P52740	ZNF132	-0.0335510624997815	3.38279801341	-0.156368056913169	0.883318187840218	0.999772751739274	-4.925733091748
Q9NX00	TMEM160	0.123377055651505	3.33048405500811	0.633795163589517	0.560649607748576	0.999772751739274	-4.9257539925505
Q96I27-2	ZNF625	0.0498370130122563	3.35748425034416	0.254069249240383	0.811969012716132	0.999772751739274	-4.9264021757526
Q9NQ31-1	AKIP1	-0.0399917073640079	3.32962921259238	-0.206764689364992	0.846293189787478	0.999772751739274	-4.92652714071848
Q9H2K0	MTIF3	0.0940035800794618	3.32001818090783	1.29614055419146	0.264659371604519	0.999772751739274	-4.92689646550415
P15408-1	FOSL2	0.123758325687551	3.30551165460578	0.987031326049864	0.379509535012277	0.999772751739274	-4.92707042254572
Q9H6Y7	RNF167	0.103855896864595	3.3053643425714	0.788223597523248	0.474656114570838	0.999772751739274	-4.92707306446367
P51805	PLXNA3	0.0712553168193023	3.35098370071908	0.402017346844405	0.708227965742545	0.999772751739274	-4.92711955249683
Q12809	KCNH2	0.094266166020616	3.34853633421415	0.598477140453766	0.581765127286529	0.999772751739274	-4.927138393412
O95208-1	EPN2	0.10004093166536	3.28612768562474	1.4254153679937	0.227177004054683	0.999772751739274	-4.92766208545554
P19793	RXRA	0.0838914237141556	3.3127874199915	1.50941005471218	0.205706597643576	0.999772751739274	-4.928146812589
P36897-2	TGFBR1	0.101755772364269	3.35853616704844	0.722952613659418	0.509723969726387	0.999772751739274	-4.92886582590575
P51159-1	RAB27A	0.146280012693568	3.32130842572496	0.889570370589773	0.423966851214739	0.999772751739274	-4.92887000863433
Q9NPB8	GPCPD1	0.0572178727959333	3.28471726034504	1.83897409313855	0.1397710106598	0.999772751739274	-4.92890380636705
Q13586	STIM1	0.152740084137191	3.36696327805898	0.841671333218895	0.447353305368294	0.999772751739274	-4.92912189323282
Q9NRG1	PRTFDC1	-0.104598458371562	3.30787197374447	-1.50287419923094	0.207301041308961	0.999772751739274	-4.93070516280866
Q9BWH2	FUNDC2	-0.276320908349362	3.3622548585034	-1.28547721800932	0.268008062416758	0.999772751739274	-4.93081198534122
Q5U5Q3	MEX3C	0.132790394973213	3.2899326704696	0.775065363446551	0.481573216037863	0.999772751739274	-4.93128587676377
Q7Z5H3-2	ARHGAP22	-0.00924197717188823	3.25094551809947	-0.0450906479667111	0.966196513931057	0.999772751739274	-4.93161711122122
Q08ER8	ZNF543	-0.0797968882885559	3.37655137972451	-0.495282431182651	0.646376948794495	0.999772751739274	-4.93193184053414
Q8N6Q8	METTL25	-0.0365161226834745	3.28606970280774	-0.194787331078098	0.855053707372465	0.999772751739274	-4.93197450081434
Q7Z309-3	FAM122B	0.0335459027181176	3.31601842498202	0.18214157410887	0.864330583170895	0.999772751739274	-4.93214648803014
P0DJ07	PET100	0.228449938677773	3.21206777100705	0.866704046231361	0.435003890480629	0.999772751739274	-4.93256039893398
P35442	THBS2	0.10483339794751	3.3029381910444	0.692850259278134	0.526531393618517	0.999772751739274	-4.93266928281296
Q9H920	RNF121	-0.0222204864964922	3.2964314527675	-0.112368457428775	0.915945076701043	0.999772751739274	-4.93303555870802
O75575-1	CRCP	0.127082324625766	3.27604737273399	1.22540755693081	0.287645571878614	0.999772751739274	-4.93312045669511
Q9Y5J5	PHLDA3	0.0965724101005075	3.29392227663514	0.710747406989479	0.516490689654147	0.999772751739274	-4.93318870664756
Q13564-4	NAE1	0.0662633195462009	3.30241212774973	1.78674871232576	0.14851830847556	0.999772751739274	-4.9332793445331
Q9NVG8	TBC1D13	0.0725476661239246	3.30160519936211	1.5943687925901	0.186085838954346	0.999772751739274	-4.93328002865206
P68036-3	UBE2L3	0.0917423185848585	3.3600271797294	1.73636423020867	0.157512403292342	0.999772751739274	-4.93335451199957
Q9UJK0	TSR3	0.0797031897430022	3.26323372357181	0.338878173826803	0.751745640422738	0.999772751739274	-4.93336186842238
Q96NL8	C8orf37	-0.00218895662268937	3.29912671429294	-0.010179976928751	0.992365223426243	0.999772751739274	-4.93355106231294
Q8N594-1	MPND	0.0987125991311446	3.33081972854242	1.06977250597665	0.344985478006009	0.999772751739274	-4.93359861042807
Q9H8X2	IPPK	-0.096300362996208	3.34319329968239	-0.710768051572075	0.516479188701354	0.999772751739274	-4.93377149161771
O75037	KIF21B	0.108195176666565	3.29408474535691	0.521726907116662	0.629419011299492	0.999772751739274	-4.93381256812969
Q8TB45	DEPTOR	0.102666025167309	3.33305366831228	0.774021737248713	0.48212513702335	0.999772751739274	-4.93398772307386
Q6ZUT6-1	C15orf52; CCDC9B	-0.0753361713181173	3.2984547841202	-0.476286678027847	0.658721443113597	0.999772751739274	-4.93398985782489
Q96JF6	ZNF594	-0.00137384030951102	3.38116225154688	-0.00739069062376525	0.99445707508345	0.999772751739274	-4.93437826369899
Q8IX07	ZFPM1	-0.079983447216168	3.33437117797095	-1.51026508996749	0.205498933686791	0.999772751739274	-4.93449827172374
Q9NW61	PLEKHJ1	0.0441331420227076	3.36177323672252	0.230490053720581	0.829020381215894	0.999772751739274	-4.93469735998496
Q4VC05-2	BCL7A	0.0907748484878432	3.36014684533209	0.603340396342776	0.578826486313732	0.999772751739274	-4.93475388204684
Q86Y01	DTX1	-0.0755162661326566	3.34211315789821	-0.440617475664447	0.682257430114958	0.999772751739274	-4.93524063023429
O75154-3	RAB11FIP3	0.0464105692829073	3.30893998134275	0.227165437803396	0.831434058943875	0.999772751739274	-4.93538790859163
Q9P2E5-1	CHPF2	0.0997693891558155	3.31048297137853	1.4726467513519	0.214839822336053	0.999772751739274	-4.93563208310352
Q96NB2	SFXN2	0.20343641814157	3.3295244207619	1.47068181832093	0.215339377439249	0.999772751739274	-4.93621074270053
O95873	C6orf47	-0.0153793745342444	3.34816785607875	-0.0844334259465157	0.936769149424605	0.999772751739274	-4.93644096343517
Q8WTR2	DUSP19	-0.108794828770722	3.3436572578609	-1.00796235169641	0.370500843049145	0.999772751739274	-4.93644968823086
O95072-1	REC8	0.10121866621391	3.32274787525318	0.839825177532029	0.448275128562046	0.999772751739274	-4.9366166378427
O94925-1	GLS	-0.143744420357396	3.34621717802469	-0.75656217603172	0.491430480008755	0.999772751739274	-4.93711639321407
P17544-6	ATF7	0.0969329980570663	3.30991504596115	1.20867041568924	0.293356498827968	0.999772751739274	-4.93853540350606
P52803	EFNA5	0.135148275244158	3.34836484595632	1.32131139898144	0.256914742177172	0.999772751739274	-4.93873934423458
Q14849-1	STARD3	0.141476188732035	3.29685352422686	0.877273753490875	0.429873273789993	0.999772751739274	-4.93905505498577
O75954	TSPAN9	0.157786548922915	3.36007058423427	0.973153341720156	0.385586729017006	0.999772751739274	-4.93913545634391
Q969X0	RILPL2	0.00768257826516564	3.27393489237444	0.0397905747776183	0.970167070076455	0.999772751739274	-4.93918145254014
Q86SX6	GLRX5	0.135454053900694	3.28858802326556	1.40040638971508	0.23399418837543	0.999772751739274	-4.93932782748213
Q9UKY4-1	POMT2	-0.0345277544397936	3.3707386416267	-0.16657958462777	0.875783020081437	0.999772751739274	-4.93944778881011
P61923-4	COPZ1	-0.252169701816337	3.31987085603062	-1.0453044307224	0.354893325656754	0.999772751739274	-4.93968304172535
Q9ULX5-2	RNF112	-0.0346921494076611	3.32190257392021	-0.162003742194916	0.879157660691695	0.999772751739274	-4.93994795624664
Q9Y4D2	DAGLA	0.0821643659122788	3.29795519421314	0.437361170335276	0.684428608826466	0.999772751739274	-4.94087023044132
Q9BRA0-2	LSMD1; NAA38	0.0912247576811024	3.32111991149805	1.07894108596082	0.341337118361914	0.999772751739274	-4.94107199366267
Q8TB96	ITFG1	0.151816537276383	3.29978038844027	1.08280837106582	0.339808686869185	0.999772751739274	-4.94114051894353
Q96MM7-4	HS6ST2	0.0992493979863601	3.31605643066364	0.859052763260301	0.438748888889601	0.999772751739274	-4.94205541579218
Q9ULH4	LRFN2	0.11136302242491	3.30384627379338	0.48243352680852	0.654712185398795	0.999772751739274	-4.94221948557999
O75381-1	PEX14	0.172749553675672	3.31346148014832	1.42971859292923	0.226024137056607	0.999772751739274	-4.94228200858997
P52849-1	NDST2	-0.0519682736799993	3.37182136975278	-0.273132145222285	0.798274656468659	0.999772751739274	-4.94237933907363
Q8N5I2	ARRDC1	0.00980265158340046	3.33318964179347	0.0539301444697555	0.959577100363348	0.999772751739274	-4.94242694956468
Q96IR2	ZNF845	-0.00449450708037562	3.32196334782593	-0.0243926321574304	0.981707892237482	0.999772751739274	-4.94328593424231
P36507	MAP2K2	0.0841095348976686	3.30651423555907	1.86060366728101	0.136311524923429	0.999772751739274	-4.94390271420689
Q9Y2Y6	TMEM98	0.104138112732619	3.33037848238215	0.601947767111002	0.579666981559043	0.999772751739274	-4.94392220381039
Q24JP5-2	TMEM132A	0.130592229469546	3.32359971569863	1.3393816000041	0.251491357265896	0.999772751739274	-4.94481770327491
Q9NQT5	EXOSC3	-0.0795165798349668	3.31050104756566	-1.76998555505281	0.151448522381146	0.999772751739274	-4.94519089268549
Q4G0X4	KCTD21	-0.0754047939696488	3.31543643848185	-0.487351799052979	0.651514353262915	0.999772751739274	-4.94550664769304
Q9H999	PANK3	-0.136109063771194	3.32020640893852	-1.00252045130211	0.372824931929087	0.999772751739274	-4.94666151647484
Q07002-3	CDK18	0.0974354511712431	3.26305507326119	0.690542861747276	0.527836097030103	0.999772751739274	-4.94668075731194
O14813	PHOX2A	-0.0855299391134898	3.30771843089332	-1.69089117574326	0.16612558338349	0.999772751739274	-4.94672443271851
Q14CZ0	C16orf72	0.0788569746074175	3.30884907024016	0.520342432634614	0.630300156637596	0.999772751739274	-4.94690940246509
Q8TCF1-1	ZFAND1	0.123576677772943	3.32106228238725	1.24971953603643	0.279537514378828	0.999772751739274	-4.94734439005343
Q8TB40	ABHD4	0.12326027469489	3.35018588928461	0.811905959332584	0.462401138448259	0.999772751739274	-4.94763176086023
O95801	TTC4	-0.118507871601096	3.33147466816102	-1.68991322229209	0.166316182271719	0.999772751739274	-4.94773461645478
Q8N4L2	TMEM55A; PIP4P2	0.115299447796221	3.24444357639676	0.726517366488979	0.50776001101773	0.999772751739274	-4.94783005163559
P08174-7	CD55	0.110077505524465	3.33858935524129	0.979355371398951	0.38286055121884	0.999772751739274	-4.94841015725895
Q9Y3C1	NOP16	-0.188367451207832	3.35358207600171	-1.80102438868147	0.146070558776858	0.999772751739274	-4.94853569251659
P52294	KPNA1	-0.109484260397101	3.30921099607844	-1.42462874366765	0.227388381357796	0.999772751739274	-4.94895322322702
Q8N587	ZNF561	0.0134270484111841	3.37574446496257	0.0731460696511234	0.945201808922509	0.999772751739274	-4.9490355320157
Q9ULK0	GRID1	0.163339872723081	3.31387485960133	1.34049123408976	0.251161995377649	0.999772751739274	-4.94917806230251
O14681	EI24	0.126863889632858	3.39263554186743	0.642364025298762	0.555606054949501	0.999772751739274	-4.94942314123296
Q8TEY5	CREB3L4	0.0940115679293407	3.30446438361704	0.614262600461707	0.572262700116082	0.999772751739274	-4.94950008105638
Q8IWT0	ZBTB8OS	-0.115289691670402	3.3236051274306	-0.784308543471044	0.476706141653545	0.999772751739274	-4.95018204392616
P56277-1	CMC4; MTCP1	-0.0209380064031017	3.37849855258718	-0.080727296079389	0.939536917759327	0.999772751739274	-4.95038436421065
Q8N157-1	AHI1	0.050210953530623	3.30280460493495	0.296701372573171	0.781464198531103	0.999772751739274	-4.95070284212202
Q9NXB0-1	MKS1	0.101650426142791	3.32370236219725	1.05767049205158	0.349854641262472	0.999772751739274	-4.95091145778036
Q68CQ4	DIEXF	0.0668671803910086	3.30568994970789	2.07202810263618	0.106990302876771	0.999772751739274	-4.95111008198195
O75486-1	SUPT3H	0.0690186844851562	3.33557556417909	0.358877465895707	0.737829431998696	0.999772751739274	-4.9512632777489
B7U540	KCNJ18	0.0927566669640294	3.32963930724119	0.49878239661397	0.644117225228239	0.999772751739274	-4.95172863650099
P36402-3	TCF7	-0.036850286184639	3.36705855265595	-0.203129379434171	0.848949374111338	0.999772751739274	-4.95190855788615
P61916	NPC2	0.0983936736652232	3.31099998807501	0.977154612111244	0.383826014714637	0.999772751739274	-4.95202472433618
Q9NQS7	INCENP	-0.0643321940713756	3.33360736476005	-1.78570561581431	0.148698868631261	0.999772751739274	-4.95211294462481
Q96ND0	FAM210A	0.0956827832089762	3.28509972187464	1.11744409385328	0.326393646238422	0.999772751739274	-4.95280238314492
Q9P2D3-1	HEATR5B	0.0519047453676105	3.31893968889048	1.98993854471979	0.117465204935762	0.999772751739274	-4.9529215444959
Q9NW68	BSDC1	0.0735687848392044	3.30854291638512	1.46133143717093	0.217732678479685	0.999772751739274	-4.95303599072639
P49768-1	PSEN1	0.0458427479377946	3.3486224207122	0.188682318955139	0.859528898017531	0.999772751739274	-4.953040970844
Q5SZL2	CEP85L	-0.0843438135513977	3.30189915514736	-0.552495722051421	0.610030371756789	0.999772751739274	-4.95312070516546
P31431-1	SDC4	0.158344065126426	3.28344741618431	1.12565355457956	0.323285529299303	0.999772751739274	-4.95357691635381
Q9HCM9	TRIM39	-0.105025092890972	3.33048755033783	-0.894070477607404	0.421822082602226	0.999772751739274	-4.95377140507161
Q14376	GALE	-0.0879726342374785	3.3145238956409	-1.18874225724062	0.300295582520524	0.999772751739274	-4.95391447368351
Q02241-1	KIF23	-0.0831742828362615	3.37530790828003	-1.87576148215991	0.133942141712531	0.999772751739274	-4.95439400553059
Q8TDH9	BLOC1S5	0.131708297771604	3.30530141086251	1.15791914711439	0.311331428504748	0.999772751739274	-4.9547412428059
Q9P1W3	TMEM63C	0.143007607098488	3.28202848870942	1.09683273528613	0.334317665486038	0.999772751739274	-4.95506809159487
Q8WV92	MITD1	0.11275505563822	3.30748815931565	0.832107309507519	0.452145278784647	0.999772751739274	-4.95507656122394
Q15008	PSMD6	0.0775598817971916	3.31129183368528	2.06620616407545	0.107698321373495	0.999772751739274	-4.95618179664655
Q9BQ89	FAM110A	0.0301612615562993	3.31654898001288	0.175896940945149	0.868921512857682	0.999772751739274	-4.95714107409533
Q8N4B1-4	FAM109A	-0.0195219948547829	3.32200875460515	-0.106321618496217	0.920446459369838	0.999772751739274	-4.9575020777426
Q9H6V9-2	C2orf43; LDAH	0.138912849309319	3.31474899309839	1.68929766406609	0.166436269761495	0.999772751739274	-4.95767242729907
Q01459	CTBS	0.194055356119156	3.27461851000778	0.537248075678885	0.619591818504764	0.999772751739274	-4.95805281703443
Q92186	ST8SIA2	0.118063904164837	3.31219457563868	0.890480342061934	0.423532431265455	0.999772751739274	-4.95818794859989
Q13496	MTM1	0.0820206997572571	3.31889434361697	0.528491046086727	0.625124717771826	0.999772751739274	-4.95869831192565
Q8TAS1	UHMK1	0.0789713743960898	3.30351001470046	0.417691754885202	0.697621242519209	0.999772751739274	-4.95887103952752
Q9C000	NLRP1	-0.0845664536808451	3.34301418742233	-0.511238285575913	0.636112936661731	0.999772751739274	-4.9589945651923
Q8N4C6-7	NIN	0.0744613610670408	3.32336482561586	1.78221762824588	0.149304341391476	0.999772751739274	-4.95900657921591
Q8ND76	CCNY	0.139795761031632	3.35287890018312	0.894348307908337	0.421689961703592	0.999772751739274	-4.95903105740649
P82912-1	MRPS11	-0.135717256984271	3.33633628067268	-1.42801015455397	0.22648113892817	0.999772751739274	-4.95922617270122
P19256	CD58	0.0898676405454497	3.34625476243281	0.3749447684256	0.726736229954762	0.999772751739274	-4.95941982278931
Q9H903-4	MTHFD2L	0.0812368162551743	3.28947887822161	0.572878923086336	0.597394155578738	0.999772751739274	-4.9595117420187
Q14129	DGCR6; LOC102724770	-0.0781957902941352	3.31651354197738	-0.53014198050695	0.624079315280507	0.999772751739274	-4.95960925409718
Q8N8R5	C2orf69	-0.208439986542427	3.30994026104572	-1.31460208919564	0.258957289566535	0.999772751739274	-4.96001084336139
Q9BV94-1	EDEM2; MMP24-AS1-EDEM2	0.0657072571066106	3.30260293713797	0.377546362068663	0.724947529797762	0.999772751739274	-4.96017009189087
Q13796	SHROOM2	0.0597148733785599	3.31635767882333	0.357217606186337	0.738979910107107	0.999772751739274	-4.96041625245053
Q9H2X6-1	HIPK2	0.043976374418441	3.33359716952124	0.26302679803276	0.805523587373321	0.999772751739274	-4.96049034162534
Q5JU69-1	TOR2A	-0.0565234799425854	3.36566440682042	-0.333735436099853	0.755342955919205	0.999772751739274	-4.96061218649368
Q92536	SLC7A6	0.173297892873518	3.34972692357613	0.814893959888922	0.460872708175985	0.999772751739274	-4.96094343217095
Q8N2I9-4	STK40	0.00144134410027735	3.24727791916048	0.0053800713297896	0.995964992654634	0.999772751739274	-4.96102281225302
O14523	C2CD2L	0.062395442738894	3.39302887543781	0.392281736967773	0.714856686774435	0.999772751739274	-4.96109801787173
Q8TF01	PNISR	0.100263361189828	3.30958477108479	1.59146737231747	0.186723088519067	0.999772751739274	-4.96110617932551
P84022	SMAD3	0.113211088041871	3.35366709502149	0.887896116191928	0.424767098653816	0.999772751739274	-4.96139957125516
Q92543	SNX19	0.0459079278269727	3.2261089514262	0.170036227405058	0.873235890364841	0.999772751739274	-4.96152521419619
P57775	FBXW4	0.0687040733422804	3.31133048898967	0.440033376438108	0.682646612373096	0.999772751739274	-4.96285086202754
Q9NX05-1	FAM120C	-0.0743884990367072	3.32450102207107	-0.479325313003789	0.656737760163547	0.999772751739274	-4.9632952874634
Q96CS7-2	PLEKHB2	-0.0781631146400084	3.34867994507489	-0.381952483870416	0.721922984041653	0.999772751739274	-4.96338323281628
Q9Y2L8	ZKSCAN5	-0.00802556412505927	3.38859318069111	-0.0458167996461306	0.965652605751355	0.999772751739274	-4.96341469139171
Q9Y4D1	DAAM1	0.115015309858816	3.31098955325711	1.02274281560511	0.364252374932809	0.999772751739274	-4.96368564316481
Q15797	SMAD1	-0.15269994264026	3.33841682225902	-0.855270720676005	0.440609673843457	0.999772751739274	-4.9637709080867
Q9BYX2	TBC1D2	0.0343362439661245	3.35165560367103	0.19168033557756	0.857330434659969	0.999772751739274	-4.96397522674232
Q99592-2	ZBTB18; ZNF238	-0.181144672598452	3.33417713610704	-1.43566188029178	0.224441503290859	0.999772751739274	-4.96398333190667
Q05586-5	GRIN1	0.0427081374560068	3.36615686868615	0.206442914629587	0.846528199515753	0.999772751739274	-4.96433434045696
Q8NBK3	SUMF1	-0.0159864883389525	3.32065950649023	-0.0927810290136143	0.930539119821699	0.999772751739274	-4.96438174112446
Q9Y6Q3-2	ZFP37	0.175959470488419	3.30881390841293	0.766408376894136	0.486166125447665	0.999772751739274	-4.96459605152221
Q9BSY4-2	CHCHD5	0.0947905600015837	3.28991999536105	0.833851457030641	0.451268346420504	0.999772751739274	-4.96496715388667
Q16828-1	DUSP6	-0.0230229609233082	3.2837488936006	-0.134052222163295	0.899836008098146	0.999772751739274	-4.96523460909822
Q8IVS8	GLYCTK	0.0389380147244119	3.26428046692603	0.227647392217863	0.831084018890012	0.999772751739274	-4.96533317925467
P23634-1	ATP2B4	0.234408777530856	3.30858538158082	1.36812291624484	0.243095485099711	0.999772751739274	-4.9657944185551
Q9UKV5	AMFR	0.10469150542059	3.34261655503291	1.06449428464476	0.347101625746192	0.999772751739274	-4.96586375380975
Q8TAQ5-2	ZNF420	0.0889884130601329	3.39995857997479	0.467696715329504	0.664347486962956	0.999772751739274	-4.96622893068355
Q9UKY7-3	CDV3	0.384439486987888	3.2608028288543	0.934727133933814	0.402850603813561	0.999772751739274	-4.96631754829455
Q86SQ0-1	PHLDB2	0.042611381668606	3.30574375351546	0.255259726895477	0.81111134821253	0.999772751739274	-4.96637547654486
Q8NG31-2	CASC5; KNL1	0.0401740695651322	3.32958867157473	2.17512695032107	0.0952682012299013	0.999772751739274	-4.9664856910498
O43763	TLX2	-0.0824010010029612	3.36806387804328	-0.533323197277227	0.62206792298407	0.999772751739274	-4.96655806563496
Q5BJH7	YIF1B	0.044967516478409	3.3377205685137	0.155719759562155	0.88379708662498	0.999772751739274	-4.96670232303405
Q9NRG7-1	SDR39U1	0.0954695734812897	3.29027512327236	0.894035561960276	0.421838688993425	0.999772751739274	-4.96701614038559
Q86UT6	NLRX1	-0.0207931038726039	3.31069915918786	-0.114447640020452	0.914398163410287	0.999772751739274	-4.96714086126322
O75155-1	CAND2	0.0663432166515015	3.3323758792128	1.56126769494712	0.193491222155104	0.999772751739274	-4.96745019365727
Q96FC9-2	DDX11	-0.0354232502174282	3.29408777211926	-0.18322579814261	0.863534136528681	0.999772751739274	-4.96746367574471
Q8NBM8	PCYOX1L	0.0799512744126057	3.3233295651401	1.26131992706408	0.275746015788038	0.999772751739274	-4.96817227610895
Q9Y3I0	C22orf28; RTCB	-0.102100957553074	3.33055001132375	-2.33035899356147	0.0802263720673853	0.999772751739274	-4.96823292922031
O75356	ENTPD5	-0.0116945352805525	3.32341024453448	-0.066879100956022	0.949887631562368	0.999772751739274	-4.96877311531339
Q5TGY3	AHDC1	0.0670814923200049	3.33970350896029	1.64830694583499	0.174641273158272	0.999772751739274	-4.96880466270464
Q6P9F7	LRRC8B	0.140565501742254	3.32253209447578	1.03766270027747	0.358039177585327	0.999772751739274	-4.96892410019592
P16415	ZNF823	0.0706388746750843	3.34461403158809	0.355619460865761	0.740088394026643	0.999772751739274	-4.96921002733927
P48380	RFX3	0.0975556473325565	3.30090736891036	1.2229453076573	0.288479075281265	0.999772751739274	-4.96932038859619
P53805	RCAN1	-0.0939208866962901	3.34752354085678	-0.66637167760584	0.541642824844077	0.999772751739274	-4.96940015712117
Q8N972	ZNF709	-0.0428559666016341	3.37444663176001	-0.17486340925805	0.869681954085793	0.999772751739274	-4.96978271586187
Q9P2N6-3	KANSL3	0.0814167490462018	3.30437891836829	1.51254038662356	0.204947367091242	0.999772751739274	-4.96990024627979
Q8IUX4-1	APOBEC3F	-0.0426050511577481	3.26105064738178	-0.260961185040353	0.807008271491192	0.999772751739274	-4.96993893166913
Q96C34-1	RUNDC1	0.0826103317129786	3.29921248868312	1.22203586476489	0.288787511566768	0.999772751739274	-4.97073762194424
Q96MT3	PRICKLE1	0.124397830515192	3.29513573021322	0.605246173634256	0.577677600989719	0.999772751739274	-4.97108926494377
Q96SL8	FIZ1	-0.0566380650748648	3.27909511921581	-0.344976682930513	0.747489638517115	0.999772751739274	-4.97144572619758
P78382	SLC35A1	0.15144199041161	3.30562478865188	0.718491065055599	0.512189902429751	0.999772751739274	-4.97146833785911
O94844	RHOBTB1	-0.157487202772519	3.15070553131869	-0.883966456486203	0.426650251448686	0.999772751739274	-4.97171141685415
O75541	ZNF821	-0.0023255917569957	3.33648956571839	-0.0131672203073204	0.990124994858254	0.999772751739274	-4.97204033993725
Q53HV7-1	SMUG1	-0.113348488422815	3.31554074918608	-1.06086996699647	0.348561412395512	0.999772751739274	-4.97221851194874
O75077	ADAM23	0.123632433459211	3.31188133458468	0.968566175192708	0.387613803363426	0.999772751739274	-4.97270910000891
Q86YC2	PALB2	0.0671508827565636	3.32689367063763	1.61148813644437	0.182371404683594	0.999772751739274	-4.97283186695448
Q96F25	ALG14	0.0562509421345326	3.31712110211892	0.324235157642361	0.762008044113592	0.999772751739274	-4.97314729075513
Q86UN3	RTN4RL2	0.150009183137685	3.32667240330799	1.01571411030536	0.367212151997227	0.999772751739274	-4.97355370955771
Q14106	TOB2	-0.110825814371033	3.35332483760277	-0.853207774351907	0.441627339732925	0.999772751739274	-4.97358843492125
Q16563-2	SYPL1	-0.0224408466805577	3.37134581722959	-0.0747694875056877	0.943988404748079	0.999772751739274	-4.97360111053462
P10606	COX5B	0.156719034881046	3.29623195820712	1.57960245332299	0.189352576506813	0.999772751739274	-4.97387705926111
Q15040	JOSD1	-0.073205570965081	3.31093364350303	-0.466248072400144	0.66529893836968	0.999772751739274	-4.97418242207267
Q8IVF5-2	TIAM2	0.0303278652816895	3.33007511265855	0.174109093101208	0.870237064695484	0.999772751739274	-4.97441392082917
O60308	CEP104	0.0125671403411408	3.34056841267437	0.0686711688098308	0.948547439128306	0.999772751739274	-4.97444216658334
Q9Y2K5-1	R3HDM2	0.0906048469295767	3.31245889344005	0.728451202942426	0.506696932879956	0.999772751739274	-4.97504817332577
Q6PID8-1	KLHDC10	-0.027085998710839	3.30853176758771	-0.158541350215408	0.881713212303012	0.999772751739274	-4.97531868729005
Q68D10-1	SPTY2D1	-0.113154761905261	3.33427389970448	-0.968321053702022	0.387722379957992	0.999772751739274	-4.97556338224851
Q00597	FANCC	-0.00188846239604413	3.31556335763567	-0.0102066332581915	0.992345232585518	0.999772751739274	-4.97571037155969
O15083	ERC2	-0.110981157206575	3.26378048367406	-0.370462797474304	0.729822703289517	0.999772751739274	-4.97597295126691
Q5VUG0	SFMBT2	0.00254347333131915	3.32978309135688	0.0145146368802907	0.989114558976727	0.999772751739274	-4.97676129175175
P41134	ID1	0.053914224024909	3.30065515549675	0.337070217315772	0.753009433001366	0.999772751739274	-4.97684490415471
Q8N357	C2orf18; SLC35F6	0.140622332780182	3.26326572950747	0.57628913872145	0.595296506517316	0.999772751739274	-4.9772848024731
Q01826-2	SATB1	0.0722158213288853	3.33441765876626	1.41697689626601	0.229454818992594	0.999772751739274	-4.97729118164935
Q9NWB1-2	RBFOX1	-0.0717564650919908	3.36045497232849	-0.48486533528336	0.65312991229315	0.999772751739274	-4.97732926809238
Q02880-2	TOP2B	-0.0482234036299388	3.31431545659031	-2.24345243362076	0.0882893224926085	0.999772751739274	-4.97762604333663
Q96CN5	LRRC45	0.0987164124562033	3.31137019020834	1.01995169341032	0.365425193875849	0.999772751739274	-4.97828900184944
Q8WTR4-1	GDPD5	0.0558840663569981	3.28891265184714	0.320493900962112	0.764639697927253	0.999772751739274	-4.97911792465721
P98175-1	RBM10	0.113455094440543	3.2940397912093	0.782263043130978	0.477779937427284	0.999772751739274	-4.97941769887848
O43306	ADCY6	0.135686777446919	3.30919248884787	0.987120510410728	0.379470750220103	0.999772751739274	-4.97945647417905
P50749	RASSF2	-0.0744440795140705	3.31257395527191	-1.38698805069849	0.237735354251505	0.999772751739274	-4.9800214485721
Q8IV63	VRK3	-0.0920967024886667	3.30832556984323	-0.943434757350017	0.398881973446475	0.999772751739274	-4.98055651988597
Q9HB21-1	PLEKHA1	0.0708625564854888	3.30363850447164	1.46579044461008	0.216588034163386	0.999772751739274	-4.98080392403894
P57060	RWDD2B	-0.0939965239299273	3.28191618063046	-0.384425323349531	0.720228207179291	0.999772751739274	-4.98091361272283
Q9BRD0	BUD13	0.0671694123224395	3.31329523158504	1.52448349448624	0.202076815914533	0.999772751739274	-4.98093437127101
Q86TN4	TRPT1	-0.0874172212731169	3.35181340946314	-1.2010159488352	0.296003801196738	0.999772751739274	-4.98118499415293
Q6BCY4	CYB5R2	-0.094936356353837	3.33155478439862	-0.84524948191153	0.44557099003608	0.999772751739274	-4.98125551274804
O95450	ADAMTS2	-0.0842594576667559	3.31622166278112	-0.63166583977323	0.561907755428936	0.999772751739274	-4.98146438724882
P40205	MYCNOS	-0.093837300624601	3.33578310351039	-0.891747155599905	0.422928266278073	0.999772751739274	-4.98168008199975
O15131	KPNA5	0.0134303367531342	3.30205844772684	0.0668406107452026	0.949916418567503	0.999772751739274	-4.98168869217352
Q8TAG5-2	VSTM2A	0.0361231949466872	3.33995863882079	0.206004676784571	0.846848299689359	0.999772751739274	-4.98332411217973
Q9H1V8	SLC6A17	0.102330441367845	3.31443818812768	0.633554043253426	0.560791981135285	0.999772751739274	-4.98352947288648
Q8TEZ7	PAQR8	-0.00870207573222752	3.33398903288343	-0.0294341154725269	0.977928516404804	0.999772751739274	-4.98359617161349
Q969S2-1	NEIL2	0.0601278085482905	3.27401848301253	0.361107411220243	0.736285124007735	0.999772751739274	-4.98385378298615
Q04206	RELA	-0.0878344514464292	3.32462879345114	-1.61323331419457	0.181997089345481	0.999772751739274	-4.98394436183899
Q9H4M7-1	PLEKHA4	0.077012033474485	3.32755671638548	0.524054991884208	0.627938986861326	0.999772751739274	-4.98404727381172
Q9NR81-2	ARHGEF3	-0.0724930716148078	3.29585287415829	-0.472151766264275	0.661426254927259	0.999772751739274	-4.98404975563327
A6NK58	LIPT2	0.0165264251375696	3.35734195770231	0.0911999458153435	0.931718677075775	0.999772751739274	-4.98439960423031
Q8TER5	ARHGEF40	-0.0099629010845061	3.33371460081749	-0.052674921549043	0.960516842743547	0.999772751739274	-4.98445239030948
Q5D1E8	ZC3H12A	-0.0108553217299767	3.36341948899065	-0.0596544449080057	0.955292547935527	0.999772751739274	-4.98447035450505
O15231-6	ZNF185	0.0961799223539754	3.27976327761229	0.829087869547507	0.453666618473473	0.999772751739274	-4.98452349270514
A1L0T0	ILVBL	0.0781412913006894	3.34034985781803	1.40016332463634	0.234061434855955	0.999772751739274	-4.98498004272024
Q08499-1	PDE4D	0.0903009777150181	3.30423461065735	0.847483596200537	0.444461047675033	0.999772751739274	-4.98526903236307
P59768	GNG2	0.170951059245128	3.33721068401833	1.19928383831858	0.296605963653746	0.999772751739274	-4.98590481933977
Q2NKQ1-1	SGSM1	-0.0391496044343413	3.31445393835392	-0.239343545540516	0.822603932546275	0.999772751739274	-4.98631408281414
Q53GI3	ZNF394	0.0947978490695044	3.34251449695599	0.449862779191971	0.676113303279159	0.999772751739274	-4.98663536241383
Q7L3V2	C22orf29; RTL10; GNB1L	0.106561457919684	3.32676624842492	0.702044043952088	0.521355940812861	0.999772751739274	-4.98682132407076
Q02363	ID2	-0.0506343475992963	3.34137273596592	-0.122245376648362	0.908600793172957	0.999772751739274	-4.98700844175118
Q9NNX1	TUFT1	0.0509126121129585	3.25648300511657	0.318800750266444	0.765831951668444	0.999772751739274	-4.98727673953088
O94763-1	URI1	-0.0812440028136866	3.3216632863396	-0.50730237346408	0.638635796655358	0.999772751739274	-4.98729497170901
Q5BKX6-1	SLC45A4	0.04914723869499	3.33146777972266	0.191056192026373	0.85778799465219	0.999772751739274	-4.987334285058
Q8WU20	FRS2	0.0560511551846314	3.32022908735773	0.322688509361703	0.763095509780388	0.999772751739274	-4.98762580848383
O00541-1	PES1	-0.192834652540105	3.30614577042945	-0.736484749877716	0.502298380319522	0.999772751739274	-4.98763561861609
Q8WUX2	CHAC2	-0.0909056767284767	3.2849329918376	-0.83971569885106	0.448329841240672	0.999772751739274	-4.98768367587313
Q9H819	DNAJC18	0.0648616138397922	3.34090240550869	0.376932411713436	0.725369454689899	0.999772751739274	-4.98835142197168
P98182-1	ZNF200	0.128034677182282	3.27014842680063	0.260233923589921	0.807531233944721	0.999772751739274	-4.98866485616697
Q9Y5N5	N6AMT1	-0.119919082951047	3.31086458286806	-0.96255967447742	0.390281904400504	0.999772751739274	-4.98950085785796
Q9H2C2	ARV1	-0.0922736408542758	3.38389377884562	-0.574872250387909	0.596167468733726	0.999772751739274	-4.99004787988845
P01033	TIMP1	0.0483882766320091	3.29414576443763	0.270511887685084	0.800151940125911	0.999772751739274	-4.99012389937948
Q9BWM5	ZNF416	-0.0120984136871793	3.35099672601444	-0.0733067129950951	0.945081729900698	0.999772751739274	-4.99050580078343
Q9NW97	TMEM51	0.056985853273778	3.25507881894008	0.269210129104458	0.801085193591347	0.999772751739274	-4.99061916650511
O75909-4	CCNK	0.0853801045910793	3.32823926133587	1.4870937238554	0.211202679173715	0.999772751739274	-4.99070835589344
Q643R3	LPCAT4	0.0501675233022567	3.37139432551819	0.308087921111598	0.773393576143128	0.999772751739274	-4.9907810754404
O15427	SLC16A3	0.171410461145527	3.31519769105868	0.837235250410942	0.449570893969812	0.999772751739274	-4.99089331466647
Q9Y2C4	EXOG	0.107666459362755	3.36158013603569	0.721290424491333	0.510641649265564	0.999772751739274	-4.9910546203839
Q9HCB6	SPON1	-0.00245715817070241	3.3436618055477	-0.0147550180111126	0.988934298235393	0.999772751739274	-4.99187637739387
Q6ZRY4	RBPMS2	-0.0845313343957646	3.33009489995364	-0.664687782615048	0.54261411442953	0.999772751739274	-4.99370881654009
P40938	RFC3	-0.0842056103696318	3.30897079534044	-1.91593623892042	0.127874789040332	0.999772751739274	-4.99393875506416
Q13563	PKD2	-0.0561589420277676	3.38227924336173	-0.24914499436364	0.815520005437681	0.999772751739274	-4.99404199370092
Q9NVV0	TMEM38B	0.0895476582785286	3.42480225725573	0.46061432363518	0.669006349437613	0.999772751739274	-4.99447446652735
P50443	SLC26A2	0.0482626529659975	3.37919922932837	0.289604752497408	0.786511154162286	0.999772751739274	-4.99483201594906
P53370	NUDT6	-0.0904645695755525	3.30695665897443	-0.650021827183287	0.551125274025034	0.999772751739274	-4.99515170627415
Q0ZGT2	NEXN	-0.20461553110172	3.38168789285454	-0.85525157947645	0.440619107617842	0.999772751739274	-4.99525034387607
Q8IYR6-1	TMEFF1; MSANTD3-TMEFF1	0.0794520211609412	3.34384832185355	0.296697283223005	0.78146710307189	0.999772751739274	-4.99530847193188
Q9GZP9	DERL2	0.117719964981851	3.39756338581302	0.71637730960312	0.513361252946068	0.999772751739274	-4.99589285061467
Q8N6M3	FITM2	-0.0727310809532677	3.36791298129228	-0.381930598486724	0.72193799197115	0.999772751739274	-4.99614835863705
Q7L311	ARMCX2	0.114210557383244	3.32460266841809	1.10485170185767	0.331214210374004	0.999772751739274	-4.99617791461713
Q13829	TNFAIP1	0.0402561086449516	3.33669708344954	0.255784034829524	0.810733718806455	0.999772751739274	-4.9965609041359
Q9NRY2-1	INIP	0.193276742517118	3.26244841174256	0.77853900820841	0.479739675210921	0.999772751739274	-4.99668548794689
O15151	MDM4	0.0953827645194244	3.31298435449355	0.755680541118984	0.49190395492025	0.999772751739274	-4.99679303923679
Q5T7M9-1	FAM69A	-0.00273887858844098	3.3399842867336	-0.0157036479278693	0.98822293280277	0.999772751739274	-4.99687131940426
O95772-1	STARD3NL	0.126463594280555	3.26224550833375	0.627437130929225	0.564412065903064	0.999772751739274	-4.99757708877423
Q96E09	FAM122A	0.0876861860333913	3.3258965135295	0.784562780605822	0.476572808862683	0.999772751739274	-4.99763264732485
Q15048	LRRC14	-0.133951069412642	3.31593312237524	-1.20082606622789	0.296069757116501	0.999772751739274	-4.99775582638593
O14709	ZNF197; ZNF660-ZNF197	-0.0283073683373918	3.38983046397199	-0.119188701673567	0.91087253821243	0.999772751739274	-4.99798036229296
Q6NS38-1	ALKBH2	-0.178531296677305	3.32437118953537	-1.25094986294512	0.279133041510187	0.999772751739274	-4.99812116475995
Q86VG3	C11orf74	0.0848197642003501	3.34328497790197	0.67273786141985	0.537981820459922	0.999772751739274	-4.99829580860363
Q14156-1	EFR3A	0.104920882050693	3.3155548058732	0.743514283008557	0.498472969959354	0.999772751739274	-4.99830962893523
P62191	PSMC1	0.0743240560427172	3.31128565742588	2.15854625033245	0.0970531715783574	0.999772751739274	-4.99845485377778
O15394	NCAM2	0.0873803134390888	3.32154564221932	0.977511880545878	0.383669140046594	0.999772751739274	-4.99898159131162
Q6DN90-1	IQSEC1	-0.125514131882078	3.34253409255468	-1.79369550354778	0.147321766993236	0.999772751739274	-5.00065416916629
O75676	RPS6KA4	0.0904439457838319	3.35132697559321	0.852139796478587	0.442154925552083	0.999772751739274	-5.00080019307753
Q92733	PRCC	-0.0770788430091508	3.33756647477265	-1.90603603112274	0.129341826720841	0.999772751739274	-5.0010850772767
A6NNL5	C15orf61	0.0855607526830382	3.33404221380936	0.471507121128469	0.661848508090304	0.999772751739274	-5.00205157154358
Q8WVF1-1	OSCP1	0.0453870145225336	3.33377701362276	0.29947611863092	0.779494377312496	0.999772751739274	-5.00216282659367
Q9UPQ4	TRIM35	-0.205898641905946	3.31918241424298	-0.868696505911794	0.434032935901336	0.999772751739274	-5.00254645158017
O60447-2	EVI5	0.0633403378049459	3.32030743012625	1.6777807435895	0.168699945235554	0.999772751739274	-5.00298271361366
P53779	MAPK10	-0.107792015319738	3.34803687583324	-0.852878072792524	0.441790159544227	0.999772751739274	-5.0039264308714
Q7Z449-1	CYP2U1	0.0874577313799548	3.32917735775525	0.670377467487055	0.539337166979526	0.999772751739274	-5.0042355995718
O14874	BCKDK	-0.0983588813546881	3.31976685470415	-1.17460987685005	0.305309453125658	0.999772751739274	-5.00454274319048
P61019-1	RAB2A	0.183914376674685	3.30535012488714	1.70506084921492	0.163389611906769	0.999772751739274	-5.00498751250126
Q9ULQ1-3	TPCN1	0.044414165162695	3.32283239669391	0.260383181362898	0.807423895056985	0.999772751739274	-5.005061386866
O15431	SLC31A1	0.216044357660889	3.33037701552275	0.838460596993831	0.448957468426875	0.999772751739274	-5.00552770675825
Q96GS4	C17orf59; BORCS6	-0.0834258965946206	3.31222562411923	-1.03274626402934	0.360076147505324	0.999772751739274	-5.00584009549691
Q15700-4	DLG2	0.063676316210091	3.29112305892051	0.392303942576693	0.714841532593116	0.999772751739274	-5.00586302526225
Q01094	E2F1	0.0573202447376817	3.33109051316745	0.387574158831713	0.718072942702858	0.999772751739274	-5.0075739323563
P50747	HLCS	-0.0927520453544921	3.31233054522707	-1.55049502133061	0.195966181023685	0.999772751739274	-5.00784428592122
Q6NUS6	TCTN3	0.116449619998341	3.30515245160672	0.759397231932975	0.489910276355002	0.999772751739274	-5.00816137920662
O00469-2	PLOD2	0.0847667485252737	3.33230995247902	1.66636031052704	0.1709765692093	0.999772751739274	-5.00825310914855
Q6NTE8	C5orf45; MRNIP	0.100110566591204	3.29653550937197	0.890145603412024	0.423692192656437	0.999772751739274	-5.00848610428756
Q9H4A4	RNPEP	0.0608325959001242	3.29683457559079	1.89562943707067	0.130903575841661	0.999772751739274	-5.008564740152
Q96LU5	IMMP1L	-0.068121003374143	3.24913905133794	-0.391604116370132	0.7153192042143	0.999772751739274	-5.00866461507011
Q8N668	COMMD1	-0.0976849054271541	3.32136227084352	-1.28167724027954	0.269211253228646	0.999772751739274	-5.00928334076608
Q8TDN6	BRIX1	-0.0612330725365007	3.30437112660416	-1.62609532961525	0.179262862654572	0.999772751739274	-5.00940526180613
P19440	GGT1	0.0897322327156623	3.33636850781791	0.6062077096512	0.577098520790843	0.999772751739274	-5.00957634005563
P42574	CASP3	-0.0920474621976633	3.30241978891296	-1.56586230364037	0.192445429990528	0.999772751739274	-5.00968283034188
P61925	PKIA	0.0948513231867222	3.22994028319963	0.629468733569138	0.563207971282897	0.999772751739274	-5.01018180160935
Q9H0F6-1	SHARPIN	0.0811120782825916	3.31081197186525	0.594022736298295	0.584465343232677	0.999772751739274	-5.01022787638989
O75110	ATP9A	0.15264000144306	3.29481326860975	0.893907544324422	0.421899580669058	0.999772751739274	-5.01066180357534
Q9UKZ9	PCOLCE2	0.00480586430855579	3.35245335157923	0.0283799567918907	0.978718718331104	0.999772751739274	-5.01101635243146
Q9BTT6	LRRC1	0.0719714789831225	3.34380020216646	0.349078721224511	0.744633022318421	0.999772751739274	-5.0112021649414
Q7Z7K0	CMC1	0.177515987840414	3.31919581994925	1.01042649368736	0.369452644558254	0.999772751739274	-5.01140334995362
P49757	NUMB	0.188089233449876	3.26759369956876	1.67483920686346	0.169283275426156	0.999772751739274	-5.01179137130337
Q9P0K1-2	ADAM22	0.147633151975899	3.34130097474954	1.34339142861435	0.250303152027064	0.999772751739274	-5.01201402048759
P33897	ABCD1	0.0989772397253393	3.33684663037512	0.567519794178405	0.600700167010597	0.999772751739274	-5.01208489985485
Q9UC06	ZNF70	0.107021303272192	3.32345875815162	0.97624371981343	0.384226232812059	0.999772751739274	-5.01208520801211
Q5T6F0	DCAF12	-0.0894342562439699	3.34496003737292	-1.1041250816252	0.331494340646308	0.999772751739274	-5.01242051892913
Q96EU7	C1GALT1C1	0.0827413622756644	3.28895127430179	0.685653930148242	0.530608188422732	0.999772751739274	-5.01285860269117
Q13370	PDE3B	-0.0694812722572988	3.35511418581638	-0.454669170827666	0.672931088500147	0.999772751739274	-5.0129466804717
P60763	RAC3	0.127308127070051	3.31496585606125	0.898012546005659	0.419950649114624	0.999772751739274	-5.01294825115613
Q92561	PHYHIP	-0.0802453617255653	3.32606310536334	-1.27570118519786	0.27111399059542	0.999772751739274	-5.0130776637229
O60609-1	GFRA3	-0.0510704346088188	3.33645152009025	-0.351059817696726	0.743255180132603	0.999772751739274	-5.013284741829
Q15928	ZNF141	-0.0446512039375534	3.33279456819094	-0.225836213968329	0.832399709568462	0.999772751739274	-5.01351207867971
Q9ULG1	INO80	0.108154613838512	3.32744853228001	1.61544194282918	0.181524513175834	0.999772751739274	-5.01365717158052
Q96HJ3-1	CCDC34	0.0693515207496996	3.29897154324806	0.495808474612596	0.646037017854281	0.999772751739274	-5.01368873961642
Q9NR56-1	MBNL1	0.105760346102352	3.3443243509192	1.06920965983372	0.345210582414568	0.999772751739274	-5.0137751034905
Q53HC9	TSSC1; EIPR1	-0.0858895291687838	3.33216389216676	-1.45918904091772	0.21828480565256	0.999772751739274	-5.01388047163492
Q6R2W3	SCAND3; ZBED9	0.0376604606411787	3.31619128364013	0.240193683847277	0.821988678011117	0.999772751739274	-5.01413517473437
Q6PJ61	FBXO46	-0.101199141221084	3.31470093615912	-0.874183745469261	0.43136805021772	0.999772751739274	-5.01460695061106
Q9P278-2	FNIP2	0.0857875792881085	3.33554860270405	0.775779380149337	0.481195888205417	0.999772751739274	-5.01471293271448
P27816-1	MAP4	0.050373680414312	3.30359787715727	2.11965771931359	0.101387284878517	0.999772751739274	-5.01500098301132
Q96DH6-1	MSI2	-0.104375014922123	3.32049476818997	-1.66648954414819	0.170950627634615	0.999772751739274	-5.01518077615269
P46100	ATRX	0.0246704566120731	3.31389432048949	0.158215049266788	0.881954141720891	0.999772751739274	-5.01538120580117
O95886	DLGAP3	-0.0866335331671433	3.30214945717103	-0.805336979464192	0.46577532916489	0.999772751739274	-5.01541513415413
Q86TW2-1	ADCK1	-0.071438723744526	3.33539847218143	-0.508850304129863	0.637642888438961	0.999772751739274	-5.01550277989194
Q86VQ0	LCA5	0.059163948296844	3.30854322226849	0.421620058078492	0.694975894542547	0.999772751739274	-5.01610917648606
Q8WUP2	FBLIM1	0.0711549978471015	3.26950988892844	0.427057267886888	0.691323088330476	0.999772751739274	-5.01636374720739
Q9UDV6	ZNF212	-0.0927068101620039	3.3490742282324	-0.753060404042759	0.493313115428107	0.999772751739274	-5.016521446706
Q15583	TGIF1	0.010297283334134	3.35121099566515	0.0617929216208694	0.953692389798718	0.999772751739274	-5.01655194165132
Q8WUY8	NAT14	0.100588350317377	3.33901108987012	0.817754005154928	0.459413462114667	0.999772751739274	-5.01661069417368
Q8N5Z5-2	KCTD17	-0.0876692906826355	3.31353316890603	-1.02526604847331	0.363194973225596	0.999772751739274	-5.01675047928374
Q6P1S2-1	C3orf33	0.139324151442153	3.29814533019672	0.566214578230904	0.601507112765803	0.999772751739274	-5.01704972314576
Q96PV4	PNMA5	0.0636658998633101	3.31695309559978	0.357933316002894	0.73848373743163	0.999772751739274	-5.01721322711718
Q9H336	CRISPLD1	-0.0869605998715863	3.38271836677198	-0.621946225817386	0.567675167711555	0.999772751739274	-5.01722464892636
Q9UH73	EBF1	0.0871270792329949	3.29451434118665	0.987867640177453	0.379145970724686	0.999772751739274	-5.01729377281044
P61599	NAA20	-0.108779664715003	3.26688125025967	-1.28368741052581	0.268574123723775	0.999772751739274	-5.01771991385621
Q92990	GLMN	-0.230717195536383	3.32145985768857	-1.47473432543343	0.214310369640855	0.999772751739274	-5.01777287400642
P09038-4	FGF2	0.0715020249395561	3.27234798251637	0.372400768023574	0.728487371246881	0.999772751739274	-5.01781970797601
Q96FZ7	CHMP6	0.129479675072333	3.33182417674367	0.938587536497214	0.40108706577624	0.999772751739274	-5.0178913674755
Q9UPW8	UNC13A	0.0416849853101082	3.25936968992388	0.153639033802613	0.885334528279069	0.999772751739274	-5.01815165084601
O00124-1	UBXN8	-0.046338039882765	3.35226810700771	-0.307239547673819	0.773993714941171	0.999772751739274	-5.01838608654812
Q9HD64-2	XAGE1D; XAGE1E; XAGE1B; XAGE1C; XAGE1A	-0.00636466732980911	3.3298307127844	-0.0375295074731864	0.971861277862298	0.999772751739274	-5.0186186676639
Q9H8W5-1	TRIM45	0.0877253390358137	3.30862116238187	1.09622989682067	0.334552035725804	0.999772751739274	-5.01887465518587
P57740	NUP107	-0.0543006468545901	3.3205846291726	-1.92954122269953	0.125888130543799	0.999772751739274	-5.01890667078181
Q96BM9	ARL8A	-0.107098811117183	3.3370385104087	-0.933500168157738	0.403412484956663	0.999772751739274	-5.01890898245299
Q9H3F6-1	KCTD10	0.0836375936017469	3.33014636263974	1.31522469546888	0.258767083453816	0.999772751739274	-5.01921777491823
Q8WTV1	THAP3	-0.0792306884570351	3.3372914424963	-0.621702909295692	0.567820059154501	0.999772751739274	-5.01930257465083
Q96IC2	LOC81691; REXO5	-0.0786208243765428	3.34134473378252	-0.443850382810825	0.680105523055014	0.999772751739274	-5.01934988067314
Q8IYL2	TRMT44	0.0684970912245402	3.29409252680939	0.516375734471356	0.632828864748917	0.999772751739274	-5.01945458534508
Q6IAN0	DHRS7B	0.101879481033054	3.36542201049568	0.721971762201028	0.510265341591355	0.999772751739274	-5.01964418299989
Q96HA1-1	POM121	-0.0899188551032198	3.3504511463295	-0.599707197405118	0.58102093069809	0.999772751739274	-5.02024061220276
Q13045-1	FLII	-0.0374806643188934	3.28199798366708	-0.221545732019692	0.835519078283019	0.999772751739274	-5.02033508579454
Q6VN20-3	RANBP10	0.120054923647237	3.32249900813025	1.09056915517142	0.336760078429778	0.999772751739274	-5.02067103718545
Q9Y6B2-1	EID1	-0.0703368755496939	3.3247857864929	-0.454790932661136	0.672850579419585	0.999772751739274	-5.02075311610835
Q8TC05	MDM1	-0.0821565100142257	3.34653000334091	-0.591034295651325	0.586281515236244	0.999772751739274	-5.02104014173536
Q15390	MTFR1	0.0980499515958387	3.31818583213725	0.915676924937029	0.411649166867174	0.999772751739274	-5.02119629633576
Q8NC54	C5orf15	0.185403841397272	3.30771943445173	0.915667816018205	0.411653412150943	0.999772751739274	-5.02128573812619
Q9H0H0	INTS2	0.0622426028617878	3.31429092828497	1.65907158076364	0.172446354792842	0.999772751739274	-5.0220390923088
Q96S16-1	JMJD8	-0.0921532601303599	3.33088820301498	-0.528629494592464	0.62503700860819	0.999772751739274	-5.022207524343
Q7Z7B1	PIGW	0.123268462652636	3.3500424909224	0.500926046684465	0.64273548423424	0.999772751739274	-5.02264636738935
Q15034	HERC3	0.0454803645069743	3.33593731868475	0.278416859429683	0.794493450484556	0.999772751739274	-5.02296592271
Q96AK3	APOBEC3D	-0.0291640753959251	3.30531183762044	-0.17599251777855	0.868851198972915	0.999772751739274	-5.0233398800994
Q8NCP5	ZBTB44	-0.0295125139077446	3.35432144487395	-0.190357437940664	0.858300331855312	0.999772751739274	-5.02342337484138
Q96AA3	RFT1	0.0182355940570352	3.30008768894303	0.111930220652573	0.9162711829132	0.999772751739274	-5.02395063444021
Q9NRA0-5	SPHK2	-0.0162961788077967	3.33035828297868	-0.0995979607746676	0.925455907339163	0.999772751739274	-5.0240188365702
Q9UGI0	ZRANB1	0.0760576581805444	3.32059619434485	0.598995720044321	0.581451304820235	0.999772751739274	-5.0242198491253
Q13398-8	ZNF211	-0.0939578004330512	3.374731569388	-0.784760349964017	0.47646921496107	0.999772751739274	-5.02450565970006
P61086	UBE2K	-0.0553689961916871	3.30827660047563	-1.7609567312932	0.153052207312367	0.999772751739274	-5.02494147429674
Q9UKI2	CDC42EP3	0.0839085364857756	3.30276465997908	0.73986867211928	0.500454148426156	0.999772751739274	-5.02522911723437
Q07817-1	BCL2L1	0.0610286497580191	3.29952308996114	0.446374173627388	0.678428175982446	0.999772751739274	-5.02529445410784
Q9UJY1	HSPB8	-0.0960711664668937	3.36661048537195	-0.680307113621407	0.533651828190255	0.999772751739274	-5.02558231052002
P23975-2	SLC6A2	0.177189780371386	3.32476186021006	0.988551837522759	0.37884875935162	0.999772751739274	-5.02572033179112
Q9UHK6-5	AMACR	-0.0368920567443005	3.27975557633665	-0.208549252457562	0.844990177313622	0.999772751739274	-5.0258448383987
P61812-2	TGFB2	0.0426993120754452	3.2863749302711	0.290071508392092	0.786178814363091	0.999772751739274	-5.02608562158048
Q8WYL5-1	SSH1	0.0118039790506522	3.31324583166972	0.0744408095184737	0.944234056447076	0.999772751739274	-5.0266252636201
Q96EK9	KTI12	-0.154197251726502	3.32109267263897	-1.52225066107544	0.202610348972679	0.999772751739274	-5.02663320532644
Q92692-1	PVRL2; NECTIN2	-0.0095690281261634	3.32007789274745	-0.0414468568491653	0.968926145446111	0.999772751739274	-5.0267213394426
Q9Y680-2	FKBP7	-0.0853191624127286	3.34547299131937	-1.46891405127915	0.215789807929267	0.999772751739274	-5.02720364261997
Q7Z5Q1-6	CPEB2	-0.067460557579609	3.35538953676967	-0.277119865303704	0.795420821232197	0.999772751739274	-5.02722180291194
O95379-4	TNFAIP8	0.0816673387584267	3.27913834175247	0.527313983496133	0.625870707004382	0.999772751739274	-5.02730820751104
Q5SQ80	ANKRD20A2	-0.0830178867515754	3.35457388833096	-1.00000887578206	0.373901840041553	0.999772751739274	-5.0275000473823
P17040-1	ZSCAN20	-0.046771502805849	3.33959165731564	-0.313583301404707	0.769510805153753	0.999772751739274	-5.02788680759421
P53794	SLC5A3	-0.0704080873218559	3.33620699302039	-0.347426666559417	0.745782902097777	0.999772751739274	-5.02805690844903
Q8IVF7	FMNL3	0.0857918758951405	3.32889226875153	0.97881049745501	0.383099389770312	0.999772751739274	-5.02808313877003
Q75V66	ANO5	-0.0593704440959193	3.30463992109368	-0.433909317186001	0.686734202056111	0.999772751739274	-5.02834718507577
Q9UHF7-2	TRPS1	-0.0664776788973998	3.32947125702982	-1.53756336065857	0.198980092079326	0.999772751739274	-5.0283582836295
Q8IY57-5	YAF2	-0.0454618085087601	3.35303442198012	-0.281742194267434	0.792117664570912	0.999772751739274	-5.0287865046663
Q9UH92	MLX	0.118160375697331	3.30848711257489	0.652494852520861	0.549683608800447	0.999772751739274	-5.0290786595232
P35222	CTNNB1	0.0941473065494553	3.32774135805415	1.84338200307989	0.139058414503731	0.999772751739274	-5.02915409413285
Q8TD22	SFXN5	0.0109484577459791	3.33287897950359	0.061654938741014	0.953795630387334	0.999772751739274	-5.02923179900153
P52198	RND2	0.0759245522323034	3.28671639700569	0.630491334784917	0.562602555802756	0.999772751739274	-5.02943396225218
Q9BVG9	PTDSS2	-0.0141382328083918	3.3471125518954	-0.0457408026168361	0.965709528626222	0.999772751739274	-5.02949468959594
Q96P47-4	AGAP3	0.0744289113122833	3.34421780829368	0.578436183056523	0.593978280780811	0.999772751739274	-5.02968706442563
Q9NQZ5	STARD7	-0.117589430510552	3.32742254294265	-1.37145858089959	0.242139115998185	0.999772751739274	-5.03046559165447
Q9NQZ7	ENTPD7	-0.0260403520345018	3.33293668353934	-0.145896437671495	0.891060810629004	0.999772751739274	-5.03073409781691
Q92623	TTC9	0.0983429509066838	3.3252382059658	0.750634654224142	0.494620447301637	0.999772751739274	-5.03077864856396
Q96HB5-4	CCDC120	-0.0752659000655272	3.30869868814902	-0.569200492635363	0.599662098519521	0.999772751739274	-5.0308581329767
Q8NAN2-1	FAM73A; MIGA1	-0.0838506236981878	3.29661766582992	-0.385933827384807	0.719195296585707	0.999772751739274	-5.03150380038789
Q8IYY4-1	DZIP1L	0.0284441087583871	3.35366202993615	0.162202355931964	0.879011119804013	0.999772751739274	-5.03168861911812
Q8NBE8	PHOSPHO2-KLHL23; KLHL23	0.030889635402573	3.35556804252079	0.178114410860259	0.867290545649026	0.999772751739274	-5.03195231735932
Q5RHP9	C1orf173; ERICH3	-0.112681941691594	3.34812424554215	-1.28578539019634	0.26791071317413	0.999772751739274	-5.03232662609945
A6ND36-1	FAM83G	0.00766006613058322	3.33460663898289	0.0499635704428913	0.962547000869838	0.999772751739274	-5.03240189674176
Q99638	RAD9A	0.0218118916980581	3.33470596296507	0.145373473741348	0.891447879959773	0.999772751739274	-5.03268786030361
P53597	SUCLG1	0.080617211385041	3.30542642573618	1.79353197996892	0.147349814386369	0.999772751739274	-5.03271963539758
Q86U28	ISCA2	0.0862521188801486	3.29682358981472	0.983693118683125	0.380963735154167	0.999772751739274	-5.03303809552767
Q9UK39	CCRN4L; NOCT	-0.0789055360604348	3.34699156406115	-1.18924400662713	0.300118996016816	0.999772751739274	-5.03344931887647
Q7Z6J9	TSEN54	-0.0892471037881359	3.33412316641723	-1.3877890385679	0.237510375772449	0.999772751739274	-5.03358159772715
A0PJW6	TMEM223	0.0445328839573013	3.34108398857198	0.152790275273422	0.885961849129658	0.999772751739274	-5.03372123505338
Q8WVL7	ANKRD49	0.0966203601863679	3.27831879657854	0.892682218450288	0.422482775104877	0.999772751739274	-5.03385387241554
Q9UGM6-1	WARS2	-0.116975899949479	3.32296538541942	-1.43771411241303	0.223897597364196	0.999772751739274	-5.03406259851916
P08253	MMP2	0.0829904630198701	3.28173981152547	0.976629564804716	0.384056660501446	0.999772751739274	-5.03423652646243
Q96NJ6	ZFP3	0.0239027197318704	3.33602509227293	0.124298775819507	0.907075282557105	0.999772751739274	-5.03467709321647
Q8NG27	PJA1	-0.0771399445006685	3.36740914973457	-0.552901182940509	0.609777381458522	0.999772751739274	-5.03474491625355
Q13164-1	MAPK7	0.104241057102755	3.33975326132828	1.31781033339236	0.257978624432139	0.999772751739274	-5.03482311090117
Q9NS23	RASSF1	-0.0671162638136301	3.2373309807052	-0.335252530516823	0.754280971262328	0.999772751739274	-5.03507318502969
Q06413-1	MEF2C	0.0922178339880902	3.31150725398871	1.0139911907585	0.367940884048177	0.999772751739274	-5.03510383069003
Q96DN6	MBD6	-0.190427301591235	3.35998158035734	-0.800982324262515	0.468022733458027	0.999772751739274	-5.0353786659297
P55198	MLLT6	0.0888738892777157	3.34140556986799	0.711896287790722	0.515850941026054	0.999772751739274	-5.03552654956461
Q8NDL9	AGBL5	0.0791572853070676	3.32442006583396	0.594545138762225	0.584148242028097	0.999772751739274	-5.03563550147291
O75638	CTAG2	-0.0827081786504954	3.3273596596573	-0.668947210861209	0.540159599192286	0.999772751739274	-5.03583976818677
O60266	ADCY3	0.131673331062735	3.2963664929383	0.582869857133678	0.591262103429525	0.999772751739274	-5.03634133333746
Q59EK9-1	RUNDC3A	0.0319209457183766	3.35705153229031	0.212214241458705	0.842316042575189	0.999772751739274	-5.03661182347133
Q8NB37	PDDC1; GATD1	-0.0811990854842276	3.33828920155756	-0.847223012634027	0.444590394978082	0.999772751739274	-5.0366675124671
Q76N32	CEP68	0.0841122056809561	3.34521971315405	1.02808798254235	0.362015599243344	0.999772751739274	-5.03667719336013
Q9Y2A4	ZNF443	0.0168620190004962	3.36525386281276	0.0918403847038077	0.931240855867434	0.999772751739274	-5.03667857252897
Q6P1R3-1	MSANTD2	0.0870704594712627	3.33674969052076	1.05151068850629	0.352356499366734	0.999772751739274	-5.03668592945518
Q9H0L4	CSTF2T	-0.0766710196082013	3.32717063410248	-1.39749221208593	0.234801691745449	0.999772751739274	-5.03672219182075
Q9UDY8	MALT1	0.0726895061988784	3.30471154974442	1.43454479079681	0.224738123207858	0.999772751739274	-5.03730633201993
O43173	ST8SIA3	0.225997644948224	3.28718084662509	1.14094801163959	0.317567312410647	0.999772751739274	-5.03771571491542
Q9P203-1	BTBD7	0.0800676067139437	3.35323260254687	0.71018871929524	0.516802001780618	0.999772751739274	-5.03779970240811
Q9Y4U1	MMACHC	-0.0899881478192622	3.31687606150336	-0.947789610077812	0.396909641418257	0.999772751739274	-5.03799434853671
P07225	PROS1	0.0447615272827309	3.32197420475739	0.159901963727885	0.880708749221393	0.999772751739274	-5.0380768630731
A8MQ14	ZNF850	0.0329131997355949	3.34952794158148	0.171453906890387	0.872191766234411	0.999772751739274	-5.03848505775843
Q12893	TMEM115	0.126705056915881	3.33603946740948	1.19750308961637	0.297226235118199	0.999772751739274	-5.03862395474913
P31274	HOXC9	-0.0785956045381913	3.345289109745	-0.727781887052282	0.507064685687035	0.999772751739274	-5.03864978169072
Q05682-5	CALD1	-0.181711883224862	3.35742048404404	-1.2403662924817	0.28263074696282	0.999772751739274	-5.03865659786688
Q8NCR0-1	B3GALNT2	0.0458636361192124	3.34356917175843	0.314306822363497	0.769000205028784	0.999772751739274	-5.03880803418631
Q86TL0	ATG4D	0.00542258998008587	3.32163933903723	0.0342725779291021	0.974301993829085	0.999772751739274	-5.03928670089616
Q99759-2	MAP3K3	-0.0850880876984366	3.33190013944157	-0.816531476254594	0.460036771436599	0.999772751739274	-5.03935362223446
Q8NB15-2	ZNF511	0.0560035211897644	3.32421036887851	0.360167396319016	0.736935931162225	0.999772751739274	-5.03955118323646
Q8NCN4	RNF169	0.0991294306290708	3.32726646646418	1.32380614013967	0.256159264163056	0.999772751739274	-5.03966619648298
Q96ST8	CEP89	0.00476798619828226	3.32330534591238	0.0309324408001245	0.976805418222802	0.999772751739274	-5.040013832133
Q9NQS3-1	PVRL3; NECTIN3	0.156119201531617	3.36434466590829	0.932013397306652	0.404094227878853	0.999772751739274	-5.04004794440689
Q8NCA9	ZNF784	-0.00466732987119579	3.36393238998423	-0.030881425476366	0.976843656674945	0.999772751739274	-5.04053736771858
Q9NUE0	ZDHHC18	0.037690233219783	3.38175736654345	0.241028819821137	0.821384431547053	0.999772751739274	-5.04095345855999
O95278	EPM2A	-0.0010054460074359	3.3173506728704	-0.00605786413939493	0.995456661199827	0.999772751739274	-5.04118573548165
Q9BRR0-1	ZKSCAN3	-0.0424735482706115	3.35004572077077	-0.281349555814291	0.792398043738424	0.999772751739274	-5.04241577107513
O14529	CUX2	-0.0946378533325765	3.32897949778185	-1.28416610239413	0.268422615307967	0.999772751739274	-5.04272180528806
Q13444	ADAM15	0.119655813510462	3.30830710263454	1.12638463315022	0.323010059965236	0.999772751739274	-5.0427567829669
Q969P0	IGSF8	0.0820254917130593	3.34841658806939	0.758724514837365	0.490270675215701	0.999772751739274	-5.04285778628967
Q9UNP9-1	PPIE	-0.13118348533929	3.3236675257848	-1.60217521330928	0.184382432434434	0.999772751739274	-5.0436746690141
Q86X40	LRRC28	-0.0278354756963314	3.32561406604557	-0.178025549799852	0.867355888384523	0.999772751739274	-5.04376319532059
P17081	RHOQ	0.0635341457581022	3.30530355336879	0.342169744284323	0.749447193991045	0.999772751739274	-5.04385016611804
Q96MH2	HEXIM2	0.0774412455490401	3.3064353269799	0.612710651449069	0.573192310389787	0.999772751739274	-5.04405573268369
Q9H061-1	TMEM126A	0.17219016618796	3.29333766627856	1.31587424301739	0.258568791595951	0.999772751739274	-5.04406512922824
Q9UPR5	SLC8A2	0.311518577056335	3.17013351686973	0.891995384285028	0.422809965125797	0.999772751739274	-5.04438794099926
O43491-1	EPB41L2	-0.0689049535360141	3.32857875602901	-0.456469052417112	0.671741544631276	0.999772751739274	-5.0446654949222
P21926	CD9	0.282741672079277	3.3835371762365	1.15151889140055	0.313669723570061	0.999772751739274	-5.0452608847722
Q9UEE5	STK17A	-0.0830819169403048	3.27935513175648	-0.609463377922692	0.575140680852787	0.999772751739274	-5.04564184178365
Q9BRU2	TCEAL7	0.0492482892428603	3.30831802318153	0.312104316280638	0.770554987741066	0.999772751739274	-5.04570985888174
A5PKW4	PSD	-0.052987976431191	3.33069696942122	-0.371406523351335	0.729172296828173	0.999772751739274	-5.04584085322326
Q8N4P2	TTC30B	0.121957680091348	3.25231487305878	0.634328305523805	0.560334893242485	0.999772751739274	-5.04670373409831
P05452	CLEC3B	-0.335878494627145	3.3681075693525	-0.834854456717745	0.450764667171792	0.999772751739274	-5.04698085457519
Q9HB20	PLEKHA3	0.0668201900998564	3.33409782839165	0.478687417816339	0.65715390862178	0.999772751739274	-5.04740937742161
Q13057-2	COASY	0.105860243523329	3.26765131748698	1.113290568547	0.327976563023972	0.999772751739274	-5.04762576670643
Q8NDW4-1	ZNF248	-0.0340298991135459	3.3637856522711	-0.23545757099657	0.825418212594432	0.999772751739274	-5.04763332481862
Q02410	APBA1	-0.0617698139520423	3.35128503909814	-0.456223602021862	0.671903694809712	0.999772751739274	-5.04776329772425
Q9BX70-1	BTBD2	-0.0453515351563114	3.33842368876497	-0.304318608243776	0.776061444110256	0.999772751739274	-5.04783097020554
P49720	PSMB3	-0.0617247789536586	3.32367946821476	-1.51225765274368	0.205015824006306	0.999772751739274	-5.04801927190566
P04179	SOD2	-0.0825087345481399	3.32703674280028	-1.66875191719049	0.170497159649002	0.999772751739274	-5.04818025452415
Q8N5M1	ATPAF2	-0.167906243122109	3.30872355388207	-1.13938063494003	0.318149008138072	0.999772751739274	-5.04818418389458
Q14703	MBTPS1	0.120892347405666	3.31490625236601	1.1683654789807	0.307549621200863	0.999772751739274	-5.0486761037823
O75582-1	RPS6KA5	-0.0616428847446206	3.31602052354996	-1.51972433443838	0.203215745094347	0.999772751739274	-5.04897879537857
Q969E8	TSR2	0.110352524315755	3.31291560977604	0.995555378578593	0.375818061503735	0.999772751739274	-5.04948780556681
Q9UJP4-1	KLHL21	-0.00457083550159714	3.34902392210561	-0.0275054911531708	0.979374244040203	0.999772751739274	-5.04969075950168
Q14CS0	UBXN2B	-0.0882386470894826	3.35523221547992	-0.9746018340219	0.384948534910129	0.999772751739274	-5.05003746886544
P62158	CALM3; CALM2; CALM1	0.440039248289215	3.25821728480626	2.11061064956363	0.102426084123897	0.999772751739274	-5.05019640677923
O14595	CTDSP2	0.0961255345650047	3.33331288605104	0.523223118706623	0.628467588343283	0.999772751739274	-5.05091430271519
Q9BT43	POLR3GL; LOC101060555	-0.00817598888275083	3.36824915688846	-0.0393022519319853	0.970532952482966	0.999772751739274	-5.05096186183466
Q9NQV8-1	PRDM8	-0.0440688836859275	3.34870684228215	-0.274470440577263	0.797316469616814	0.999772751739274	-5.05134991565184
Q8NCJ5	SPRYD3	0.0176270091707212	3.31652201386532	0.116902985392595	0.912571975892657	0.999772751739274	-5.05144142165163
Q9BSE5	AGMAT	0.0207980535547541	3.30867409880057	0.0752325833025404	0.943642302885697	0.999772751739274	-5.05178497678085
P15260	IFNGR1	0.150187670516667	3.34354464979334	0.896420873049306	0.420705441892445	0.999772751739274	-5.0519955769604
Q9BVG8-6	KIFC3	-0.0269731677929781	3.30813164545792	-0.15824889016925	0.881929154041663	0.999772751739274	-5.05218558118532
O43707	ACTN4	0.0428429865911687	3.31312237794322	2.34827413114479	0.0786693352117744	0.999772751739274	-5.05289403395515
P08243-1	ASNS	-0.166939390199851	3.30892942282653	-2.04775689223311	0.109976299940799	0.999772751739274	-5.05294393376792
Q52LW3	ARHGAP29	0.0730521877549147	3.35334079980798	0.453399971561838	0.673770599930035	0.999772751739274	-5.05303643337799
Q15935	ZNF77	0.038639372548438	3.44225506035456	0.233551947660079	0.826799456879406	0.999772751739274	-5.05311766356534
O43822	C21orf2	-0.0852253732766221	3.33361601252582	-0.627430374295254	0.564416073356893	0.999772751739274	-5.05325181666869
Q86XS8	RNF130	-0.0525151257695499	3.28688994451635	-0.318680216523145	0.765916857010075	0.999772751739274	-5.05351515742504
Q13761-2	RUNX3	-0.035627026923819	3.33010838259158	-0.250334993718178	0.814661374376288	0.999772751739274	-5.05387523458225
Q9C0I4	THSD7B	0.00456805758123758	3.34844664415518	0.0296929095209172	0.977734527904382	0.999772751739274	-5.05418443284338
Q9H6K4	OPA3	0.180588814808015	3.3086368117338	0.741222948125362	0.499717490624362	0.999772751739274	-5.05440467494874
Q5J8M3-1	EMC4	0.0841741884241273	3.31803247317678	1.10352567779562	0.33172558793557	0.999772751739274	-5.05451192571289
Q9UQ03-1	CORO2B	-0.056588704622013	3.32612444337416	-0.33132148744108	0.757034096995272	0.999772751739274	-5.0545624962445
Q9UEU0	VTI1B	0.0933979854583736	3.31329290452322	1.25747123100409	0.276998446729902	0.999772751739274	-5.05504466820885
Q5VWQ8-1	DAB2IP	0.0622077059338032	3.3040752670596	1.57801381131401	0.189707539313754	0.999772751739274	-5.0563948813277
Q8TBB6	SLC7A14	0.13551468299375	3.33086692638426	1.17919535976462	0.303674113344866	0.999772751739274	-5.05640047974411
Q9Y2U5	MAP3K2	-0.0959644431378211	3.33171150767266	-0.696419493001937	0.524517775044878	0.999772751739274	-5.05690706678745
Q9Y450-2	HBS1L	0.084722253881028	3.33177574315083	0.807589860250285	0.46461595566273	0.999772751739274	-5.05715086594507
Q12959-4	DLG1	0.210800510861643	3.34664728603845	0.378575015963158	0.724240872949111	0.999772751739274	-5.05723462179815
O75177	SS18L1	0.0915550330728433	3.32776946280267	0.725990937520033	0.508049688014658	0.999772751739274	-5.05813812915304
O75365-1	PTP4A3	0.0309058299271397	3.31966218483714	0.211834366057088	0.84259309745432	0.999772751739274	-5.05814048654928
Q504T8	MIDN	0.00830968772427162	3.37691077742827	0.0551326694188727	0.958676885649635	0.999772751739274	-5.05826421121403
Q53S58	TMEM177	0.00982660084447511	3.33380397872886	0.0545591229773049	0.959106235480616	0.999772751739274	-5.05852568102418
Q6PGN9-1	PSRC1	0.192596389031203	3.26160353616033	0.744882292544514	0.49773105523638	0.999772751739274	-5.05857594983432
Q8TBF2-8	FAM213B	-0.0768125742522081	3.30149313891119	-1.14221162883028	0.317099063732739	0.999772751739274	-5.05922361343955
Q12824-1	SMARCB1	-0.0600764215949376	3.33659137791575	-1.56290963491381	0.193116826011781	0.999772751739274	-5.05960929084028
Q9BSV6	TSEN34	0.0938694790312703	3.3033844673868	1.22050157182268	0.289308572527503	0.999772751739274	-5.06022964391743
Q9UM19	HPCAL4	0.120456076322921	3.26027235072334	0.368479685547928	0.731190339292648	0.999772751739274	-5.06037502151964
Q8NDH6	ICA1L	-0.0618900030549176	3.35108399109928	-0.435817082467735	0.685459438573279	0.999772751739274	-5.06120779341956
Q6TDP4	KLHL17	0.0975237062047157	3.33787443302368	0.735591376808847	0.502786112590432	0.999772751739274	-5.06127572267799
O14576-1	DYNC1I1	0.06685991203482	3.33582372296232	1.36652298278204	0.243555523023929	0.999772751739274	-5.0617761793517
Q9UH03-2	SEPT3	0.0742429732823487	3.31698505645802	1.77662954903356	0.150279847229557	0.999772751739274	-5.06228025009538
O15254	ACOX3	0.0349339149920624	3.30255271524794	0.219363739836048	0.837106891837564	0.999772751739274	-5.0623718618004
Q8TF50	ZNF526	0.0913482737418355	3.30120259460193	0.763109284174523	0.487925212563834	0.999772751739274	-5.06238645465376
Q86TJ2-1	TADA2B	-0.0794075746483869	3.33324902278598	-0.616631723682408	0.57084555767261	0.999772751739274	-5.06247749361256
Q8TAP8	PPP1R35	0.0383137566865675	3.31541254289972	0.275082732632542	0.796878227267352	0.999772751739274	-5.06250838289745
Q9H857-2	NT5DC2	0.0731561766331104	3.27434810811085	1.58742750349978	0.187614138814342	0.999772751739274	-5.06251222722585
P53041	PPP5C	-0.0534334175497219	3.31637460244279	-2.0069338757124	0.115207454708515	0.999772751739274	-5.06305352949423
O14544	SOCS6	0.0556133170067265	3.29051160771653	0.416400013032012	0.698492249567452	0.999772751739274	-5.063566723148
Q7Z3E5	ARMC9	0.0717391781523798	3.30070164815672	1.48025931382153	0.212915470179762	0.999772751739274	-5.06394094085579
P19784	CSNK2A2	-0.0589141955517135	3.32786281624472	-1.77398772121027	0.150743389720702	0.999772751739274	-5.06403612718625
Q9H0U6	MRPL18	-0.109398714654768	3.30817151569343	-1.21375904648585	0.291608956988433	0.999772751739274	-5.06406749908339
Q96AE7	TTC17	-0.0788647273450685	3.32868941979091	-0.918895896968951	0.410151230145372	0.999772751739274	-5.06410406524643
Q5T1V6	DDX59	0.0628151641441729	3.32299496358715	1.59110796934501	0.186802182406737	0.999772751739274	-5.06445277384025
Q16611	BAK1	0.109930593481443	3.34045548882193	0.755872791942143	0.491800678738173	0.999772751739274	-5.06514804480977
Q99457	NAP1L3	-0.0320099799015712	3.31196131383309	-0.18536517236969	0.861963176523434	0.999772751739274	-5.06555006840536
Q96KC2	ARL5B	0.112674147267311	3.2980535708958	0.898495432028341	0.419721879796531	0.999772751739274	-5.06582720920376
Q96B02-3	UBE2W	0.0783401277764226	3.30884754501308	0.919450325496004	0.409893689938463	0.999772751739274	-5.06586263570129
Q8NDX5-7	PHC3	-0.0581568497015483	3.3778972208492	-0.447424644734042	0.677730680247704	0.999772751739274	-5.06592346379262
Q15796-1	SMAD2	-0.112692126991143	3.30693698325101	-0.953774264884788	0.394212690705628	0.999772751739274	-5.0661307257417
P16402	HIST1H1D	0.07349553134488	3.2248778421872	0.5733010034313	0.597134273540798	0.999772751739274	-5.06667398532898
Q92832	NELL1	0.0555554253785095	3.33213861368432	0.420608421514191	0.695656638526953	0.999772751739274	-5.06671087625561
Q9UKN5	PRDM4	-0.080945698974471	3.32105767197356	-0.826098144634085	0.455176994365544	0.999772751739274	-5.06769385617079
Q9GZN2-1	TGIF2	-0.0484927355711751	3.32614153085141	-0.343775407060017	0.748327126173391	0.999772751739274	-5.06782002634586
Q16649	NFIL3	-0.0186238591891953	3.30459498241514	-0.119240967894267	0.910833684804916	0.999772751739274	-5.06815450962283
Q9Y2G1	C11orf9; MYRF	0.0839235980155414	3.30382175715701	0.92508202681521	0.407285353772328	0.999772751739274	-5.06830726933285
Q969M7	UBE2F	0.0919085219139552	3.30537891014239	1.13524118081837	0.319689991075697	0.999772751739274	-5.06838080555153
Q8NFH3	NUP43	-0.0653069180259903	3.31587799591558	-1.62492924406534	0.17950898185337	0.999772751739274	-5.06886749324264
Q86WT1	TTC30A	-0.00525151257171146	3.32085394504688	-0.0336299285641816	0.974783631169051	0.999772751739274	-5.06903519062146
Q9ULK5	VANGL2	0.155413111432781	3.32862785167865	1.1736811650551	0.305641662052196	0.999772751739274	-5.06905714904764
O95670-1	ATP6V1G2	-0.098560894577865	3.31165155571141	-0.80312589725906	0.466915394446097	0.999772751739274	-5.06951135791075
A2RUB6-1	CCDC66	0.0553955532558204	3.32228548689054	0.322747146568783	0.763054269226543	0.999772751739274	-5.06971102789206
Q12841	FSTL1	0.0292606223449477	3.34861132303671	0.141012655311309	0.894676932210814	0.999772751739274	-5.07013435341181
Q9UJQ1-1	LAMP5	0.156560356232565	3.32673409386779	0.889020269463776	0.424229647279923	0.999772751739274	-5.07046542217232
Q9Y6R9	CCDC61	0.023426518841542	3.33967854377491	0.15006659516592	0.887975612233641	0.999772751739274	-5.07127270931195
Q9UGJ0	PRKAG2	0.087200369501054	3.27904280543817	0.801063663193764	0.467980677515695	0.999772751739274	-5.07186152153448
Q9Y4G8	RAPGEF2	-0.107545304411074	3.32478406571906	-1.01766639677533	0.366387936266733	0.999772751739274	-5.07218177774437
Q8WUX9	CHMP7	0.0916005098820384	3.29794918852522	1.43073406121461	0.225752939704496	0.999772751739274	-5.07250538837703
Q96MC5	C16orf45	0.0651094157670779	3.28276351998058	0.501800796185754	0.642172144309514	0.999772751739274	-5.0726505632761
Q14978-2	NOLC1	0.0481892284545825	3.33541419372162	0.361968278617879	0.735689348142873	0.999772751739274	-5.07357688623857
Q9Y3A6-1	TMED5	0.223585155160059	3.3245838095823	1.07412126865473	0.343250672758165	0.999772751739274	-5.0735834104274
P49842-1	STK19	-0.0463934472433898	3.27057575290373	-0.161284062474295	0.879688702698072	0.999772751739274	-5.07407466772539
Q9NY35-1	CLDND1	0.20031643057676	3.31187460847597	1.0000340082008	0.373891050405875	0.999772751739274	-5.07415068557977
Q9NQB0-6	TCF7L2	0.0711322789725161	3.32399316293621	0.406203750826352	0.705387082422348	0.999772751739274	-5.07426201089222
Q05823	RNASEL	0.15482230757989	3.28215809206893	1.174171316413	0.305466288346632	0.999772751739274	-5.07454471120003
Q58EX2-4	SDK2	0.02106997279035	3.32717200280868	0.1486381559582	0.889032144348605	0.999772751739274	-5.07459558863613
A6NNA2	SRRM3	0.101659333766078	3.33288788040254	0.71758161152231	0.512693640540504	0.999772751739274	-5.07484710141718
Q9H3C7	GGNBP2	0.0979012332828731	3.27292529117969	1.09075281271596	0.336688233984649	0.999772751739274	-5.07550883676453
O94919	ENDOD1	0.126332876733822	3.34277694877392	1.21906587052903	0.289796956345958	0.999772751739274	-5.07551132107701
O15162	PLSCR1	0.204121476167414	3.32579879179222	0.70838894668597	0.517805804008939	0.999772751739274	-5.07639729752416
Q9P287	BCCIP	0.0864684498736883	3.29336345685765	1.44080242437369	0.223081586540539	0.999772751739274	-5.07661352692775
Q9NZ72	STMN3	0.118445372179387	3.2969054991075	1.1929509138619	0.298817392948579	0.999772751739274	-5.07675699260986
Q9H6P5	TASP1	-0.0969123222873324	3.32640218949902	-0.657980374350123	0.546495166870135	0.999772751739274	-5.07709811659815
P51523	ZNF84; LOC100996464	0.077105583088201	3.36224362292141	0.410940747058509	0.702179557606946	0.999772751739274	-5.07751535506266
Q6PI47	KCTD18	0.0520377561722991	3.30061171782526	0.365575969018843	0.733195041619122	0.999772751739274	-5.07752897925284
Q6ZVL6	KIAA1549L	0.0668980712812578	3.34994322581661	0.474757519265384	0.659720995667814	0.999772751739274	-5.07837231995026
P28356	HOXD9	-0.0730300837726131	3.33090577747183	-0.688241439208156	0.529139736774605	0.999772751739274	-5.07885236448236
O95201	ZNF205	0.0273999252778964	3.38464755401165	0.166911368360203	0.87553845580992	0.999772751739274	-5.07890111554955
Q70UQ0	IKBIP	0.0926843225569843	3.31973277869645	1.06571213215285	0.346612336086853	0.999772751739274	-5.07899286993946
O75056	SDC3	0.0997393689627849	3.34339927020634	0.733636732543102	0.503854471341449	0.999772751739274	-5.07905924430651
P32929	CTH	-0.207394858035653	3.33980905968424	-1.49161011693261	0.21007847711269	0.999772751739274	-5.07925314107296
P54274-1	TERF1	-0.0605498567221605	3.31793054489135	-1.55289761505537	0.195411397389297	0.999772751739274	-5.07967712717576
Q8WXI2-5	CNKSR2	0.0500886208587061	3.30535634368236	0.343008287590129	0.748862154950758	0.999772751739274	-5.07973534835334
Q9P2G1	ANKIB1	-0.0701590547268492	3.33688402869549	-1.34734371195598	0.249137381484979	0.999772751739274	-5.07984856170182
Q96CD2-1	PPCDC	-0.013269709619861	3.301551328384	-0.0932789164951893	0.930167718482052	0.999772751739274	-5.07988452535975
P49281-3	SLC11A2	-0.264248902935977	3.35117671061524	-0.727376768348186	0.507287372551913	0.999772751739274	-5.07992554151203
Q6NW40	RGMB	0.0926569940088611	3.38712890571849	0.599781432049388	0.5809760381375	0.999772751739274	-5.07993793417578
O95948	ONECUT2	-0.0320481988003279	3.33615996615527	-0.214829267486032	0.840409574776329	0.999772751739274	-5.08020127579076
O75030	MITF	-0.00083516365159574	3.37683726548444	-0.00541804852747289	0.995936510429315	0.999772751739274	-5.08020800862439
Q4ZIN3-1	C19orf6; TMEM259	0.150227230378515	3.34740093051462	0.495287789108991	0.646373485959421	0.999772751739274	-5.08061023311106
Q7Z494-1	NPHP3	-0.0905451567506405	3.3310965863711	-0.685496201974861	0.53069779596946	0.999772751739274	-5.08125942408364
Q9Y5J6	FXC1; TIMM10B	-0.0707088238570307	3.33233158781613	-0.364705021583682	0.733796839532203	0.999772751739274	-5.08154855598089
O94941-1	UBOX5	-0.141324380849314	3.33446942617928	-0.897165842711956	0.420352027599552	0.999772751739274	-5.08159565748225
Q9NP87	POLM	0.070081637228811	3.32734904304247	0.569043539675444	0.599758990562505	0.999772751739274	-5.08181422782225
Q99435-3	NELL2	0.0859321292073067	3.34936534410654	1.04217720697451	0.356177726245021	0.999772751739274	-5.0818763069165
Q02386	ZNF45	0.0564548791624514	3.36600816351654	0.297516449573586	0.780885360295271	0.999772751739274	-5.08214833195853
P11441	UBL4A	0.0667361802089364	3.31510309192103	1.38636430109189	0.237910696877783	0.999772751739274	-5.08225577287816
Q5K4L6-1	SLC27A3	0.165942139446644	3.29127471954437	0.596907464272258	0.582715709973034	0.999772751739274	-5.08253460880796
P58557	YBEY	-0.0966953413227127	3.28265169661109	-1.03309954901366	0.359929434099188	0.999772751739274	-5.08258061079009
Q8NC96	NECAP1	-0.0921511938568954	3.30622645751775	-1.27241572169489	0.272165566224462	0.999772751739274	-5.08293835710251
Q5TA50	GLTPD1; CPTP	0.0791241515198709	3.31234945966207	0.725751801673732	0.508181317208029	0.999772751739274	-5.08309959881565
P53804-1	TTC3	0.0696059462361633	3.31496419753874	1.64329266994692	0.17567362972959	0.999772751739274	-5.08322894928142
Q8WV37-1	ZNF480	-0.0642544625570804	3.32178958773099	-0.455934386848162	0.672094784696922	0.999772751739274	-5.08340894754366
Q9UL54-1	TAOK2	0.0666448057429977	3.36334262437127	0.401620364505901	0.708497656146748	0.999772751739274	-5.08349503778014
Q9UP95	SLC12A4	0.0924903413168132	3.3020396570258	1.08396362791039	0.339353303646581	0.999772751739274	-5.08389165645227
Q96JJ6	JPH4	0.0758937198311312	3.33112190893026	0.919719118290184	0.409768880480893	0.999772751739274	-5.08424980548332
Q96SM3	CPXM1	0.058812066267125	3.32028117139865	0.489444545508807	0.650156397486546	0.999772751739274	-5.08444479267922
Q9Y3B6	EMC9	-0.0408970134901434	3.30200095485615	-0.294683852487361	0.782897704062822	0.999772751739274	-5.08457515924865
Q5SWA1	PPP1R15B	0.0205043414460219	3.34536355153497	0.147111709945866	0.890161474509397	0.999772751739274	-5.08493842330762
P98153-1	DGCR2	0.153173519579664	3.33848622007138	0.82497710745113	0.45574435809331	0.999772751739274	-5.08577225129072
Q02078-5	MEF2A	0.0400601861767382	3.35573280997386	0.253177463406072	0.81261169766743	0.999772751739274	-5.08578597151713
O00445	SYT5	0.0838993045273997	3.32912561146502	0.552450832486137	0.61005838497849	0.999772751739274	-5.08604904560035
Q6V9R5-1	ZNF562	-0.00297970640333265	3.34530006856197	-0.0189828946260678	0.985763974756745	0.999772751739274	-5.08621629814713
Q5VUD6-1	FAM69B	0.109458435569854	3.30995481299903	1.09881722015736	0.333547193140658	0.999772751739274	-5.08622213157024
Q9BRT3	MIEN1	0.0904417811101138	3.27281115796579	0.909087159406052	0.414729946205308	0.999772751739274	-5.08625197811496
O95563	MPC2	0.0980396320070561	3.34313185501078	0.524030588267694	0.627954489942162	0.999772751739274	-5.08700181725637
P49810-1	PSEN2	0.126560770564594	3.27857169674693	0.615264524108596	0.571663089843101	0.999772751739274	-5.08729457621389
Q15697-1	ZNF174	-0.0786674480780044	3.3591603257617	-0.726138884447406	0.507968265203528	0.999772751739274	-5.08738444166655
O14594	NCAN	-0.058150160573678	3.3365650805691	-0.456194504395365	0.671922918801917	0.999772751739274	-5.08795040336425
Q7L273	KCTD9	-0.107431846319653	3.33338867032691	-0.817479718436042	0.459553249826057	0.999772751739274	-5.08898532120071
O96020	CCNE2	-0.0520500358615157	3.31095354932597	-0.405882427344414	0.705604927007639	0.999772751739274	-5.08957831678717
Q86UX6	STK32C	0.00591500230480921	3.28472807487246	0.0387313498887359	0.970960719572849	0.999772751739274	-5.08971731882625
Q8TBC5-3	ZSCAN18	-0.0777269717372994	3.32695411788386	-0.649868744660539	0.551214600643125	0.999772751739274	-5.09006742385386
O75414	NME6	-0.0922792190140014	3.29872489769682	-0.970608735641976	0.386710065554322	0.999772751739274	-5.09048887371952
Q9H2J7	SLC6A15	0.159114227455298	3.35514143155088	1.15943662349387	0.310779401116283	0.999772751739274	-5.09075012005638
O15400	STX7	0.0966651094934489	3.29191982029094	1.12402472185018	0.323900045371574	0.999772751739274	-5.09101066708978
P40426-1	PBX3	0.0827591015428057	3.33184940531035	0.963279375541455	0.389961384198654	0.999772751739274	-5.09222177351561
P62306	SNRPF	-0.0658741033147494	3.3204848144221	-1.46655821846798	0.216391556733768	0.999772751739274	-5.09242407112617
P57071	PRDM15	-0.078741251902721	3.34035798139007	-0.774228934180278	0.482015522489488	0.999772751739274	-5.09277381037279
Q9BRK0-2	REEP2	0.0628876636899094	3.35335355459913	0.514033761799935	0.634324690639423	0.999772751739274	-5.09334794739912
Q8WWX9	SELM; SELENOM	-0.0118531842525967	3.35649890619998	-0.0808696391672053	0.939430595381133	0.999772751739274	-5.09406596488748
Q5D0E6-1	DALRD3	-0.0830936191351355	3.34100583999256	-0.720698723741297	0.510968615818562	0.999772751739274	-5.09422545961464
O43529	CHST10	-0.0677210017365178	3.30698482248733	-0.475466703155578	0.659257322378659	0.999772751739274	-5.09433135530159
Q06136	KDSR	0.066139812231123	3.33962942707346	0.498225412939411	0.644476527312052	0.999772751739274	-5.09479832749959
Q5TFE4	NT5DC1	0.0609134082125575	3.31995119489236	1.70801653793623	0.162824912966792	0.999772751739274	-5.09481366821093
Q86Y25	ZNF354C	0.0834067161281777	3.33630642690627	0.695259525751308	0.525171571202304	0.999772751739274	-5.09487511182674
Q8TCT7	SPPL2B	0.00165792532606329	3.34702751384667	0.00881836025223371	0.993386372721721	0.999772751739274	-5.09569430663252
Q96BY9	TMEM66; SARAF	0.078463005019399	3.37824368354649	0.525072508714163	0.627292787294173	0.999772751739274	-5.0960631899703
Q8IZD0-2	SAMD14	-0.0416870222520686	3.34395125213225	-0.269077898679046	0.801180014392463	0.999772751739274	-5.0966858800481
Q9UKV3-5	ACIN1	-0.273133806934989	3.40878232974598	-0.771959100722785	0.483217387135491	0.999772751739274	-5.09699361617046
P17010-3	ZFX	-0.109858874857524	3.38390996863428	-0.375981669838629	0.726023065269169	0.999772751739274	-5.09720809853825
Q8N3I7-1	BBS5	0.120541314381541	3.30912721976411	0.629994844328836	0.562896440023847	0.999772751739274	-5.09753330986474
O95685	PPP1R3D	-0.0765753388888667	3.32417670833175	-0.933974354847671	0.403195255843619	0.999772751739274	-5.09808160862604
Q96AT1	KIAA1143	0.0634597042736891	3.30621407905985	1.58264854635459	0.188673878942216	0.999772751739274	-5.0983051774707
P58335-4	ANTXR2	0.117000521283252	3.3018285961132	0.632834743068458	0.561216850308967	0.999772751739274	-5.09882906167168
Q8NAT1	GTDC2; POMGNT2	-0.0746590167777347	3.33142635180014	-0.506848115265519	0.638927351029333	0.999772751739274	-5.09905815386649
Q9NR77	PXMP2	-0.114198722266744	3.33313619577774	-0.683114352157707	0.532052274876293	0.999772751739274	-5.09916228791711
Q8N2G8-1	GHDC	0.108894735152815	3.36123974527792	1.26679740253759	0.273972903747082	0.999772751739274	-5.09924920658886
P04183	TK1	-0.119552328769914	3.34461453234316	-1.48232324146034	0.21239674684048	0.999772751739274	-5.09929435213001
Q9Y233-2	PDE10A	0.0339813870413769	3.34056696771019	0.245908200210336	0.817857060695533	0.999772751739274	-5.09969681562895
Q8N3R9-1	MPP5	0.107763588611532	3.31643051715183	1.66899585937762	0.170448339404166	0.999772751739274	-5.0997017625918
Q9BXH1	BBC3	-0.0169480520832216	3.30246543950944	-0.124754976364819	0.906736427741596	0.999772751739274	-5.09971236013354
P13378	HOXD8	-0.0629464246990051	3.31285583008087	-0.560021817186665	0.605345164495672	0.999772751739274	-5.09978352836953
O75298	RTN2	0.0660057768723639	3.30023943977068	0.56613445666911	0.601556670175704	0.999772751739274	-5.0998434443198
P0C7X2-1	ZNF688	-0.0602298124466501	3.35491703969523	-0.492025801799404	0.648483712689339	0.999772751739274	-5.09992267251174
Q9H609	ZNF576	-0.0864401541977625	3.29360126133674	-0.792434588747898	0.472458754514865	0.999772751739274	-5.09999263566817
Q8IV42-1	PSTK	0.0208009921459349	3.31897270770111	0.14040482498538	0.895127209791714	0.999772751739274	-5.10029074847652
O43716	GATC	0.0917071117963362	3.29142622561015	1.05209413344629	0.352118846321479	0.999772751739274	-5.10073114997499
Q9NT68	TENM2	0.0608964919675073	3.34341255838023	0.431207100361249	0.688541971947146	0.999772751739274	-5.10088079948909
Q6DCA0	AMMECR1L	0.0509442708908447	3.31850758114594	0.400181441232428	0.70947562310859	0.999772751739274	-5.10112809761178
P54619-3	PRKAG1	0.0920781968147269	3.28847725831551	1.4380151066449	0.223817935584372	0.999772751739274	-5.10115598006968
Q9GZU7-1	CTDSP1	-0.0154107191592109	3.33918448446294	-0.077416154061228	0.942010581573451	0.999772751739274	-5.10123096139277
Q9H211	CDT1	0.0779550983792764	3.28469550782951	0.804389059146891	0.466263823165051	0.999772751739274	-5.10135492422094
P01034	CST3	0.0467467630296776	3.30659111833219	0.34923065301895	0.744527313547051	0.999772751739274	-5.10143955155118
Q15573-1	TAF1A	0.0982031816403983	3.32011079087638	1.10049599749706	0.332896669442369	0.999772751739274	-5.10144969790797
Q9NRR6-1	INPP5E	0.0304706346565633	3.32920879775225	0.212683926404602	0.841973524991116	0.999772751739274	-5.10147595473095
P51151	RAB9A	0.106284840571696	3.33477931530906	0.828584201372768	0.453920786694371	0.999772751739274	-5.10154063757434
Q9HAW0	BRF2	-0.086753550827263	3.28629254683742	-0.598733606965807	0.581609910614001	0.999772751739274	-5.10160334664523
Q9P2D6	FAM135A	0.0722587516401793	3.31118258820043	0.625209533498362	0.565734332094707	0.999772751739274	-5.10191597125395
Q2TB10	ZNF800	-0.0928149452664355	3.3145708920686	-1.28278966068133	0.268858488442082	0.999772751739274	-5.10221215765748
Q66K14-1	TBC1D9B	0.0765553881401669	3.30296327462162	1.5038380800529	0.207065111759768	0.999772751739274	-5.10233986289621
Q68DU8	KCTD16	-0.034650716048837	3.32150900952758	-0.252643704484497	0.812996448149806	0.999772751739274	-5.10253469756296
Q3KR37-4	GRAMD1B	0.0478084726059152	3.32947752041137	0.235080181580404	0.825691693562006	0.999772751739274	-5.10326107285156
Q10472	GALNT1	0.10147806071608	3.31390240571298	1.12512654160162	0.323484240543253	0.999772751739274	-5.10334194517317
Q5TEC3	ZNF697	-0.0543584638185639	3.44699592812109	-0.335833030099666	0.753874787987374	0.999772751739274	-5.10412196967393
O43493-1	TGOLN2	0.0882119291396876	3.33683771315471	1.08886409774359	0.337427736856621	0.999772751739274	-5.10412220149104
P84157-1	MXRA7	0.138769361843738	3.32475367478599	1.01858512861787	0.366000628471415	0.999772751739274	-5.10418854324605
Q02487	DSC2	0.0404312860189798	3.30618361655105	0.284271070056057	0.790312732695374	0.999772751739274	-5.10441303354105
A8MT69-1	STRA13; CENPX	0.0627034642400776	3.29254156806749	0.435592269695033	0.685609592210209	0.999772751739274	-5.10445985418484
Q8N960	CEP120	0.0666957804579565	3.30767553038766	1.38926093329057	0.237097505247479	0.999772751739274	-5.10453251191181
P55786	NPEPPS	0.0603918523805058	3.29940708883269	2.14094966141166	0.0989882891544091	0.999772751739274	-5.10480687716745
Q96IL0	APOPT1	-0.0707614561756113	3.3335929267863	-0.584325445219139	0.590372133911679	0.999772751739274	-5.10481905462324
Q5XG87	PAPD7	0.00877736739608546	3.32661105825774	0.0642278531064746	0.951870725421671	0.999772751739274	-5.1048422375528
Q9H8M7-1	FAM188A; MINDY3	0.11331664321158	3.31266850383388	0.97993965528168	0.38260458056175	0.999772751739274	-5.10517308216307
P24863-1	CCNC	-0.115776168116768	3.25345676642681	-0.982383756207399	0.38153543783396	0.999772751739274	-5.10532723914548
Q86UL8-1	MAGI2	0.0503020286737884	3.32367562781052	0.352017973749124	0.742589204060133	0.999772751739274	-5.10541055232848
O15211	RGL2	-0.141515184418203	3.34569311951573	-1.10074262046624	0.332801200498051	0.999772751739274	-5.1056407388719
Q9NWM3-1	CUEDC1	0.00973129707712651	3.2941062029058	0.0594182236578854	0.955469321031358	0.999772751739274	-5.10588872753728
Q6NSJ2-1	PHLDB3	-0.0713082199949319	3.31470234571515	-0.59256997663536	0.585347770649133	0.999772751739274	-5.10600502462896
Q9HCE9	ANO8	0.0433442802983691	3.32857345185137	0.316567886395505	0.767405450675674	0.999772751739274	-5.10600798503155
Q9HBE1-4	PATZ1	-0.0134114411639007	3.30772546922	-0.0618096339153228	0.953679885516835	0.999772751739274	-5.1060385065363
Q9UBV8	PEF1	0.0388529268674928	3.25397249841435	0.144664070460168	0.891972999975046	0.999772751739274	-5.10611421394142
Q6N063-1	OGFOD2	-0.0327102294431265	3.29308115737723	-0.110257279318492	0.91751625550414	0.999772751739274	-5.1063284444207
Q9H4Z2	ZNF335	0.0784750866943961	3.33033938432344	0.748509089734626	0.49576814370659	0.999772751739274	-5.1064867854426
Q9GZU1	MCOLN1	0.118188428766929	3.3373686309747	0.422744192703714	0.694219856626639	0.999772751739274	-5.10672573435295
Q96QG7	MTMR9	-0.0759835985574306	3.3152272237821	-1.05662708335369	0.350277312978601	0.999772751739274	-5.10691746268225
Q96PQ6-1	ZNF317	0.0622665962861574	3.35176636771201	0.32848199456263	0.759025468334928	0.999772751739274	-5.10745396678964
Q8N465	D2HGDH	0.0481263216386923	3.32490311831674	0.343421701276445	0.748573797610683	0.999772751739274	-5.10783039566928
Q53G59-2	KLHL12	-0.0870066822006849	3.31613855709305	-0.553416533866142	0.609455919511614	0.999772751739274	-5.1078788236683
Q7Z736	PLEKHH3	0.0939249893818774	3.31230445205909	1.16779114783484	0.307756428130096	0.999772751739274	-5.10815272697092
Q9BS31	ZNF649	-0.133176555250752	3.29986635258681	-0.367201290542453	0.732072614444198	0.999772751739274	-5.10834773171726
Q96S97	MYADM	0.0646770186171144	3.29963721849547	0.252074025235311	0.813407161580654	0.999772751739274	-5.10859240916503
P29590-11	PML	0.0141852409682101	3.32383402963618	0.0946093443421941	0.929175385885592	0.999772751739274	-5.10918749006925
Q8IWE4	DCUN1D3	0.0946476305786271	3.31873118538948	0.705006844016272	0.519695979815614	0.999772751739274	-5.10953643910155
Q9UG56-3	PISD	0.109428115611273	3.28506764169994	1.1552633639405	0.312299736689998	0.999772751739274	-5.11018150930085
Q9H4E7	DEF6	0.0825712753616172	3.29772930567013	0.689503695475069	0.528424446141283	0.999772751739274	-5.11027380107076
Q8NB78-1	KDM1B	0.0599867554075571	3.30959650370871	1.52641777026865	0.20161578212562	0.999772751739274	-5.11093627736376
Q96B77	TMEM186	0.103623161653109	3.30660101613004	0.883455120130656	0.426895795407772	0.999772751739274	-5.11102322870007
Q5T3U5	ABCC10	-0.0790540135601992	3.32746578640765	-0.479253660228827	0.656784497325473	0.999772751739274	-5.11103973725007
Q9NX18	SDHAF2	0.0747354279985689	3.27758148799922	0.411043858028008	0.702109821848333	0.999772751739274	-5.11118221034498
Q8IYX8	CEP57L1	-0.000216313497811074	3.30844414956942	-0.00145658455353307	0.998907567975071	0.999772751739274	-5.1112590390479
Q9UNH7-1	SNX6	0.100694347925327	3.30516284470158	1.83838704603416	0.13986621007105	0.999772751739274	-5.11145631293159
P18433	PTPRA	0.133642097971845	3.32965032519595	1.16371756764939	0.309226970328621	0.999772751739274	-5.11174348363138
P05937	CALB1	0.0328816542964839	3.29385725408222	0.250616142683668	0.814458560320933	0.999772751739274	-5.1117455633269
Q6UWJ1	TMCO3	0.0343836454234376	3.31925601879319	0.178239453133332	0.867198599738226	0.999772751739274	-5.11177891661001
Q9NP66	HMG20A	0.0942557319240614	3.296663147744	1.23869195671288	0.283187900368398	0.999772751739274	-5.11185119105828
Q7Z353	HDX	0.0515815342868523	3.31818808791159	0.435004371437153	0.686002335492695	0.999772751739274	-5.11303132049051
Q8WVD5-1	RNF141	-0.0344599508678214	3.28270737940758	-0.204941909724967	0.84762472035412	0.999772751739274	-5.11328053364319
Q14209	E2F2	-0.0561245712184518	3.29013827357305	-0.404080562942869	0.706827151085621	0.999772751739274	-5.11337942169531
Q9UNK9	ANGEL1	0.0782001244829245	3.33497171612436	0.55103509951486	0.610942283438126	0.999772751739274	-5.1135206146785
Q8WVK7-1	SKA2	-0.131036622927202	3.3393831844241	-1.111527740277	0.328650495461053	0.999772751739274	-5.11362901416393
Q9Y6A9	SPCS1	0.149772808801041	3.36896307126057	1.14979010876337	0.314304105932997	0.999772751739274	-5.11373317944685
Q96GC5-1	MRPL48	-0.0731000683895544	3.30074406707978	-1.53157191292505	0.200392532149838	0.999772751739274	-5.11391358258297
Q9GZV4	EIF5A2	0.143461469984346	3.29644015429937	1.02737816463188	0.362311936048667	0.999772751739274	-5.11412924386002
Q96C03-3	SMCR7; MIEF2	0.0361311935611691	3.32532250188222	0.238950696421807	0.822888293971743	0.999772751739274	-5.11435751705189
O60779	SLC19A2	0.0001497941303441	3.38995784890648	0.000540339709322719	0.999594747434069	0.999772751739274	-5.11443770611639
Q9Y242	TCF19	-0.0721884607714716	3.30268218245744	-0.647199044276908	0.552774037466332	0.999772751739274	-5.11455581853305
P51688	SGSH	-0.0448482224679005	3.34036257553442	-0.248196326871578	0.816204730705574	0.999772751739274	-5.11477150725188
Q5RI15-2	COX20	0.169483901137752	3.31142271398309	0.933527283126505	0.403400060688926	0.999772751739274	-5.11477340196945
O94985-1	CLSTN1	0.0837193842505572	3.34393718789946	1.25712945623562	0.277109928873574	0.999772751739274	-5.11495119312081
Q96G25-2	MED8	0.0940645984763013	3.29818449882505	1.19054870031984	0.299660275244323	0.999772751739274	-5.11529703383401
Q9UHR6	ZNHIT2	-0.0769314080415322	3.33868579340727	-0.992772923698731	0.377019606441345	0.999772751739274	-5.11554845674217
Q12986	NFX1	-0.0725480000092769	3.32366339240902	-1.74061908933127	0.156730973822087	0.999772751739274	-5.11556108230853
P31327-3	CPS1	0.0743582785146167	3.33069096619463	0.580064612844729	0.592979728268391	0.999772751739274	-5.11567576466604
Q9BVN2	RUSC1	0.0773724434356369	3.31629017592691	0.700544565353373	0.522197516536663	0.999772751739274	-5.11582888674181
Q5T4T6	SYCP2L	0.0454771935023132	3.36891981315608	0.341283582941909	0.750065677006099	0.999772751739274	-5.11592123379815
Q7KYR7-1	BTN2A1	0.0873407934283565	3.33302391918002	0.382007303980484	0.721885391746131	0.999772751739274	-5.11637779064062
A8K8P3	SFI1	-0.0350320642680212	3.35307236570291	-0.214357881620826	0.840753138268242	0.999772751739274	-5.11642700412398
Q8N5Y8-1	PARP16	-0.0700440552014984	3.34891671035395	-0.396887743308227	0.711716737025071	0.999772751739274	-5.11676264741037
Q5TA31	RNF187	-0.0697100086587639	3.33906715740698	-0.658201881730767	0.546366688293686	0.999772751739274	-5.11681802960333
Q96GD4-5	AURKB	-0.065145139132909	3.31106652461457	-1.46263288965937	0.217397962027738	0.999772751739274	-5.11715956614367
O95476	CTDNEP1	-0.0696948035293261	3.34551238510047	-0.569264077676277	0.599622848304638	0.999772751739274	-5.11734789996801
Q13541	EIF4EBP1	0.221160618894664	3.3616750553261	0.708531849387967	0.517726049692528	0.999772751739274	-5.1173836637648
Q6R327-3	RICTOR	0.0525650461803677	3.32017800570718	1.75920310468808	0.153365771478735	0.999772751739274	-5.11740016452024
Q9NUU6	FAM105A	0.0505287908196832	3.34192497675675	0.279411773353127	0.793782349899092	0.999772751739274	-5.1176795191085
Q9Y3M2	CBY1	0.0606030052694284	3.34027261691408	0.556469479188667	0.607553759474177	0.999772751739274	-5.11776861597777
Q7Z5W3	BCDIN3D	0.0579112479189166	3.31992412220272	0.480593974538203	0.655910561032054	0.999772751739274	-5.11788295674726
P49641	MAN2A2	0.0876589665214156	3.31438107833853	0.764229086230824	0.487327587815049	0.999772751739274	-5.1184761662564
Q9NQ87	HEYL	0.0348197382186793	3.2989820333824	0.248790861112631	0.815775586996822	0.999772751739274	-5.11853835728762
O00748	CES2	-0.0138091829230119	3.37449278449503	-0.0989852378599103	0.925912627575034	0.999772751739274	-5.11879519077429
Q2YD98-1	UVSSA	-0.040565988706086	3.30488946226449	-0.309957955418215	0.772071392055175	0.999772751739274	-5.11896668793656
Q658P3-2	STEAP3	0.175329126828516	3.31411578476087	0.932999770415329	0.403641828638392	0.999772751739274	-5.11926116871123
Q9NTX7	RNF146	0.0774545737276135	3.3086354099761	0.968553176792564	0.387619560351088	0.999772751739274	-5.1193391649322
Q9UPQ0-1	LIMCH1	0.00358916195405136	3.32991173940017	0.0271561829528201	0.97963610150229	0.999772751739274	-5.119729813397
Q14511-1	NEDD9	-0.0310434370321255	3.34556468364512	-0.205169395182146	0.847458509754893	0.999772751739274	-5.11973151557438
A6NMB9	FIGNL2	0.0735237513301644	3.3235755424086	0.778719030567811	0.479644798052127	0.999772751739274	-5.1199815801217
Q7Z698	SPRED2	0.0152155376590373	3.34519010710232	0.0949733642827786	0.928903899638025	0.999772751739274	-5.12080837058443
Q5T4F4-3	ZFYVE27	0.0503226272810881	3.34682685345807	0.282740565133411	0.791404909308322	0.999772751739274	-5.12093806377058
Q86V42-2	FAM124A	-0.0517373179396691	3.30076553492185	-0.366390160102854	0.732632670161543	0.999772751739274	-5.1212217629615
P27544	CERS1	0.0927846711293796	3.36413282638266	0.356361897068725	0.739573340342669	0.999772751739274	-5.1218027024822
Q9NSC2	SALL1	0.112637207293623	3.26886494641302	0.461177390099214	0.668635295345085	0.999772751739274	-5.12290877987734
O15327	INPP4B	0.0696730409618927	3.32137785934814	0.680284630533346	0.533664652799291	0.999772751739274	-5.12311589524062
Q6PML9	SLC30A9	0.124772443942523	3.31748558596791	1.2754721643107	0.271187166268227	0.999772751739274	-5.12314982509866
Q6ZRI8	ARHGAP36	0.0343338634632738	3.33038480125378	0.247260755939234	0.816880197608202	0.999772751739274	-5.12331661785687
Q9H2V7	SPNS1	0.0671530169183943	3.30337762454033	0.557802224000239	0.606724556848122	0.999772751739274	-5.12352390731848
O43581-3	SYT7	-0.0287966651539693	3.32054781424261	-0.113887196709694	0.914815088817695	0.999772751739274	-5.12427772760881
Q15699	ALX1	-0.0406138810992971	3.34387106432073	-0.24140470304037	0.821112517392757	0.999772751739274	-5.12506825320861
Q96LD8	SENP8	-0.0545478445809582	3.30942199426073	-0.262949404434065	0.805579197126676	0.999772751739274	-5.12521229335587
Q8N5A5-2	ZGPAT	0.0662144985853524	3.3286849473686	1.31802259981289	0.257914000275092	0.999772751739274	-5.12534920234038
P55196-4	MLLT4; AFDN	-0.0931176036350446	3.31335330959508	-1.20488963424349	0.2946612860425	0.999772751739274	-5.12541989997257
Q9BRT6	LLPH	-0.10673474334505	3.32337273516854	-1.28506219984451	0.268139217403805	0.999772751739274	-5.12546980823483
Q15645	TRIP13	-0.111149825511738	3.27741218654774	-1.60377655404288	0.184035010498109	0.999772751739274	-5.12554369158854
Q9NVH1-1	DNAJC11	-0.0964181095911482	3.33507780866833	-1.39085232704337	0.236651915068766	0.999772751739274	-5.12557202965275
Q8WW35	TCTEX1D2	-0.0942850612270683	3.31790724508871	-0.866020953259434	0.435337178143377	0.999772751739274	-5.125773155805
Q6ZSY5	PPP1R3F	0.0297351456957989	3.3950065823558	0.0390310606277131	0.970736149982012	0.999772751739274	-5.12618086593053
P06753	TPM3	0.0385155179778123	3.31119733055078	0.266004916078552	0.803384775184811	0.999772751739274	-5.1263980399564
Q9H5N1	RABEP2	-0.106148310837786	3.32128365439203	-1.33419381026845	0.253036812734207	0.999772751739274	-5.12639863755596
Q9BST9	RTKN	0.0447357405311584	3.30464201712925	0.367937302217684	0.731564599989708	0.999772751739274	-5.12646468308159
Q9P2H5	USP35	-0.0370216109398844	3.32999577344536	-0.243867204356264	0.81933189624687	0.999772751739274	-5.12731441737417
Q8WUA7	TBC1D22A	0.144383381942991	3.31468001532193	1.17236078873504	0.306114553016026	0.999772751739274	-5.12764055272573
P48637	GSS	-0.0639025104184663	3.29995809890975	-1.8027776895409	0.145772916044031	0.999772751739274	-5.1276896116261
Q9UBU8-1	MORF4L1	-0.111918083739571	3.32629639699825	-1.72248937224001	0.160089370275827	0.999772751739274	-5.12846819677056
P43365	MAGEA12; LOC101060230	-0.204408609534941	3.28214216647621	-0.697589867720089	0.52385870937537	0.999772751739274	-5.12852109437799
Q9BV10	ALG12	0.104500873265952	3.36647374550693	0.358970351532758	0.737765075806163	0.999772751739274	-5.12862878454296
Q9H0F7-2	ARL6	-0.174112187503959	3.32024545900901	-1.20596883764706	0.294288285208518	0.999772751739274	-5.12876831138605
Q9NS93	TM7SF3	0.121247788049643	3.30499940318426	0.593489268580886	0.584789277778015	0.999772751739274	-5.12883846432443
Q2M3G4-1	SHROOM1	0.0652856388215481	3.34372149284936	0.616699017291557	0.570805339011281	0.999772751739274	-5.12907220067312
Q92484	SMPDL3A	0.0186143761847592	3.33254099480976	0.098082552109074	0.92658554735875	0.999772751739274	-5.1295999098394
Q9Y573-1	IPP	0.0831843953725101	3.31270711476167	0.770449471968628	0.484017997319049	0.999772751739274	-5.13041938063235
Q9Y3L5	RAP2C	0.0672084623996862	3.31403555801795	0.604494480306105	0.578130573369605	0.999772751739274	-5.13051594551168
Q9BQT9-2	CLSTN3	0.111572921927545	3.2826541608607	0.746431654381487	0.496891789118308	0.999772751739274	-5.13065330626402
P09630-1	HOXC6	-0.0779214800925022	3.34436907932797	-0.723427709099274	0.50946189771141	0.999772751739274	-5.13066527778805
P0CG29	GSTT2	-0.022828665163588	3.32116623836367	-0.110529297856958	0.91731378838325	0.999772751739274	-5.13078258888688
Q6ZVF9	GPRIN3	0.0726095432835809	3.32185678975144	0.625520771832346	0.565549459806733	0.999772751739274	-5.13099855565707
Q8NC44	FAM134A; RETREG2	0.00788199755106571	3.37940394613853	0.0427979425634412	0.967913959578002	0.999772751739274	-5.13182280069553
Q96E52-1	OMA1	0.123129855033506	3.32995319807975	0.880578922664499	0.428279109185136	0.999772751739274	-5.13216628065557
P41217-3	CD200	0.106680076720548	3.35038835474271	0.474476516786286	0.659904769720911	0.999772751739274	-5.13270458803685
Q8IZE3-2	SCYL3	0.0805384650096586	3.32874462644508	1.10447080264234	0.331361029692581	0.999772751739274	-5.13312251839301
Q02246	CNTN2	0.0864136777488736	3.3379455396115	0.681806356356933	0.532797139131107	0.999772751739274	-5.13318413666353
Q969E2-1	SCAMP4	0.0776029217220723	3.31671924683574	1.05734268455606	0.349987382876053	0.999772751739274	-5.13344205245847
Q9NVF9-2	ETNK2	0.00505096682325893	3.33266068239207	0.0318183089838011	0.976141429312618	0.999772751739274	-5.13356656621008
Q13901	C1D	-0.283262197451651	3.31009820845858	-0.952374079528158	0.394842274412032	0.999772751739274	-5.13426047593767
Q7Z7C8-2	TAF8	0.0716564853373084	3.3315556303102	0.968159877020089	0.38779378741211	0.999772751739274	-5.13481689496891
Q8N1G2	FTSJD2; CMTR1	0.0589509265733909	3.32049780214488	1.85301452539339	0.1375147453176	0.999772751739274	-5.1354899858411
Q9NS37	CREBZF	0.0619403697937664	3.32311162343807	0.538635354749493	0.618718073001157	0.999772751739274	-5.13593692981771
Q8WZ82	OVCA2	-0.087761163637877	3.36542821583915	-0.810968076714748	0.462881708340661	0.999772751739274	-5.13621132668119
Q08495-1	DMTN; EPB49	0.0252649803381205	3.34738765687277	0.173564086903127	0.870638197820685	0.999772751739274	-5.13621919395218
Q8WYQ9	ZCCHC14	-0.0223861511879436	3.35317763158925	-0.164059449470798	0.877641206457578	0.999772751739274	-5.13708233574782
O60911	CTSL2; CTSV	0.0278661595065374	3.35136818577215	0.219890714677412	0.836723331266928	0.999772751739274	-5.13733783886917
Q8TBE7	SLC35G2	0.194089014819392	3.33731012274766	1.03141906885256	0.360627781838249	0.999772751739274	-5.13734527594678
Q16514	TAF12	-0.0816008507490388	3.34812763307289	-0.694700696845983	0.525486755772216	0.999772751739274	-5.13764400109697
P29317	EPHA2	0.134328870597046	3.33369450911293	0.926644436442989	0.4065641936208	0.999772751739274	-5.13769391299449
Q9NR82-6	KCNQ5	0.0170429916635529	3.34189694702021	0.107362730866429	0.919671172608334	0.999772751739274	-5.13795723875062
O60242	BAI3; ADGRB3	0.0896548273182736	3.36876378718124	0.346205133120057	0.74663364147902	0.999772751739274	-5.13798361287159
Q8WUX1-1	SLC38A5	0.0905152062272322	3.35363907481282	0.289849469099639	0.786336904042681	0.999772751739274	-5.1380617357535
Q02083	NAAA	-0.0115534134676717	3.34048139084325	-0.0827820850818136	0.938002253721272	0.999772751739274	-5.13811808909947
Q6NT76-5	HMBOX1	0.0700942319893189	3.33258723287725	0.756409954399533	0.491512204751425	0.999772751739274	-5.13813980252965
Q8NFU5	IPMK	-0.0638411246078687	3.33987901377448	-0.59584347767313	0.583360632999722	0.999772751739274	-5.13821219159164
Q7Z5L9-2	IRF2BP2	-0.0960963766291712	3.29025248972569	-0.231484067930577	0.82829916645239	0.999772751739274	-5.13857973070893
Q9UM00-1	TMCO1	0.145814841512065	3.37681497733279	0.841608294927599	0.447384756610056	0.999772751739274	-5.13863250432149
O75865-2	TRAPPC6A	-0.0681121845586114	3.30138235659483	-0.410639761390939	0.702383139767029	0.999772751739274	-5.13871527861112
Q9NPC7-1	MYNN	-0.111734260322789	3.3524027330584	-1.07170022726347	0.344215503809528	0.999772751739274	-5.13880505917364
O94875-11	SORBS2	0.0343639287853717	3.31079372269253	0.271251101220923	0.799622164469487	0.999772751739274	-5.13930027342567
Q9BTZ2	DHRS4	-0.0738609647882001	3.33106157943738	-1.19576777735493	0.297831852135206	0.999772751739274	-5.13961078894177
Q96RK4-2	BBS4	-0.0725289756043365	3.31575936925142	-1.10433977289316	0.331411549378707	0.999772751739274	-5.13968690176292
Q53GS9	USP39	0.0695320505348629	3.32443297787984	1.70802631774743	0.162823047903447	0.999772751739274	-5.14020383104517
Q14789-2	GOLGB1	0.0702560189145619	3.33067127940548	0.370904176746593	0.729518474849065	0.999772751739274	-5.14026653872537
Q8WTS1	ABHD5	-0.0523481306245161	3.29849788251143	-0.4294238268855	0.689736352976718	0.999772751739274	-5.14081418061074
Q86TI0	TBC1D1	0.0698173248660384	3.31762010880617	0.928895996284734	0.405526831321314	0.999772751739274	-5.14087263081622
P54136-1	RARS	0.0719556755832762	3.30415230888814	1.23181662572104	0.28548671087035	0.999772751739274	-5.14103055321724
Q9H7D0-1	DOCK5	-0.0275851602314279	3.33538240447734	-0.218084302425066	0.838038362722979	0.999772751739274	-5.14162382936655
Q9H8V3-3	ECT2	0.0628317903044472	3.31545703397251	1.74547726532003	0.155843760416927	0.999772751739274	-5.1419900643671
Q8IXQ3	C9orf40	0.0760625677110564	3.31391518905634	0.974632606824459	0.384934986526849	0.999772751739274	-5.14220821251004
P51452	DUSP3	-0.128673410784001	3.34562400098834	-1.24007384318636	0.282727987381931	0.999772751739274	-5.14240907388596
O75581	LRP6	0.0619577163936972	3.33746089988655	1.47325176208577	0.214686243071204	0.999772751739274	-5.14258120920984
Q9UJV8	PURG	-0.0327924547631247	3.29147673669626	-0.266749189106362	0.802850580427908	0.999772751739274	-5.14269613461746
O95210	STBD1	0.0852868527666496	3.35968996585439	0.755412721265635	0.492047853766732	0.999772751739274	-5.14303938617824
Q96FX2-1	DPH3	0.0778561627168849	3.27180452399082	0.700314187388911	0.522326902441939	0.999772751739274	-5.14335323867394
Q96LW7-1	C9orf89; CARD19	0.00311916609255357	3.27595274795942	0.0113551504441086	0.991483911983951	0.999772751739274	-5.14424071747865
A2A3K4-2	PTPDC1	0.00292247729392926	3.34005459342253	0.0220231788148389	0.983484374028883	0.999772751739274	-5.14449823713994
Q86VP3-2	PACS2	-0.0134010186089181	3.26097226024359	-0.0931962552362798	0.930229378522501	0.999772751739274	-5.14464914713236
P62633-3	CNBP	-0.0248828741722785	3.13883009097698	-0.124501236519065	0.90692489665065	0.999772751739274	-5.14490755295571
Q9ULD0	OGDHL	0.0694189682141788	3.3113842008753	0.861036205307095	0.437775571019757	0.999772751739274	-5.14523886837274
P28827-2	PTPRM	-0.0503496786769379	3.3451766859751	-0.443419779239389	0.680391932205934	0.999772751739274	-5.14549339387772
Q96HV5	TMEM41A	0.0968069911458512	3.36257090428442	0.316125098761622	0.767717644562472	0.999772751739274	-5.14560620984528
Q6ZS30-2	NBEAL1	-0.0360874170963188	3.32935860110064	-0.276862875990912	0.795604621132482	0.999772751739274	-5.14611343647142
Q8WZ42-12	TTN	0.23269653275085	3.32462127065486	0.48645604077973	0.652096099076773	0.999772751739274	-5.14639848710191
Q8IVV7	GID4	-0.0757331922816899	3.30458708168492	-1.18519208716371	0.301547817394582	0.999772751739274	-5.14640817922139
O60831	PRAF2	0.0531515982001088	3.33729991451804	0.449814341387977	0.676145414789075	0.999772751739274	-5.14652381874256
Q96N03-1	VSTM2L	0.0103825496736584	3.31440493148799	0.0620086555928608	0.953530977033766	0.999772751739274	-5.14661381858739
O60725	ICMT	0.00959989552979077	3.37766316806594	0.0429477620059173	0.967801724586282	0.999772751739274	-5.14665647641045
Q8WWI5	SLC44A1	-0.0267887478754456	3.34804756544059	-0.146584003583418	0.890551967798499	0.999772751739274	-5.14787537559037
P59190-1	RAB15	0.0215585977249626	3.34134903322552	0.15402620326902	0.885048403492885	0.999772751739274	-5.14832695800605
Q92831	KAT2B	-0.0303197730405546	3.32529022962048	-0.208492637590871	0.845031505910988	0.999772751739274	-5.14860107799659
Q8NF64	ZMIZ2	-0.103523878506081	3.36109136141401	-1.03592406323366	0.358758358889877	0.999772751739274	-5.14872213379093
Q9Y2K9	STXBP5L	-0.0673501672999844	3.33007802817719	-1.10397523165043	0.331552138346508	0.999772751739274	-5.14876973644191
Q6IQ19-1	CCSAP	-0.0258145091348983	3.4048001953455	-0.20692973151679	0.8461726579578	0.999772751739274	-5.1491947781547
Q5SXM8	DNLZ	-0.106078106998145	3.27424839383079	-0.836106502427783	0.450136553511438	0.999772751739274	-5.14932220201308
Q9NS69	TOMM22	0.0758169407560906	3.30956507873855	0.704019691629347	0.52024862177928	0.999772751739274	-5.14945379942481
Q8TEQ8-1	PIGO	0.139783850604393	3.36605212320868	0.639166982602551	0.557484145159297	0.999772751739274	-5.149707010556
Q9H792	PEAK1	0.0898464084290633	3.28187694801081	1.17472866792887	0.305266984730248	0.999772751739274	-5.14996435439596
Q8N335	GPD1L	0.0799027164821331	3.29522768021597	1.12232789581843	0.32454135117104	0.999772751739274	-5.15041889334351
Q9NX47	MARCH5	0.11579684808088	3.30945360533606	0.950819134795628	0.395542447816833	0.999772751739274	-5.15054954447909
Q9Y2D9	ZNF652	-0.0435533952728834	3.357756552468	-0.325835680302469	0.760883397923827	0.999772751739274	-5.15062623314983
Q9NW15-1	ANO10	0.100911453205775	3.3707486170529	0.531558876385657	0.623182961996958	0.999772751739274	-5.150678854729
O75398	DEAF1	-0.0618538525558875	3.30347658435325	-0.566439860960137	0.601367783087429	0.999772751739274	-5.15140569377364
Q9Y5P8-1	PPP2R3B	0.0686093737961726	3.300470976532	0.987552519823718	0.379282925099516	0.999772751739274	-5.15147382510406
P49441	INPP1	0.113010112585059	3.27346107723164	0.816529317169658	0.460037872841316	0.999772751739274	-5.15168199491208
Q53FA7-1	TP53I3	0.0686687013929219	3.30705413253056	1.57937501494264	0.189403352813641	0.999772751739274	-5.15200581069816
Q03181	PPARD	0.0744541825593741	3.31189375533192	0.796040658220154	0.470583337189847	0.999772751739274	-5.15205382298829
Q92529	SHC3	0.127822326931581	3.29243680999091	0.961901287234414	0.390575315820459	0.999772751739274	-5.1520847786768
Q5BKT4	ALG10	0.164556847217796	3.35913864585583	0.518163667871254	0.631688331294256	0.999772751739274	-5.15246817293226
P35052	GPC1	0.0694208740209727	3.33827586798023	1.11467840411468	0.327446878204859	0.999772751739274	-5.15257448838172
Q7Z6V5-1	ADAT2	0.0802092087235619	3.29961445995388	0.965096680068723	0.389153047206804	0.999772751739274	-5.15272820086956
Q96DU7	ITPKC	-0.0728503503962088	3.33145874927082	-0.818214349487956	0.45917892730862	0.999772751739274	-5.1529791028883
Q93062-3	RBPMS	-0.0103856196564575	3.30753166804804	-0.0774356334290749	0.941996026721956	0.999772751739274	-5.15378877267237
Q9NPI8	FANCF	0.0899124704656434	3.31372809946776	0.874971663114298	0.430986495864777	0.999772751739274	-5.15418319961546
Q6P4A7-1	SFXN4	0.165559265150976	3.34875317637968	0.952817096833406	0.394642982171264	0.999772751739274	-5.15450430847191
Q96SI9	STRBP	0.0605480955398596	3.30873033550572	1.81909468294184	0.143033824500887	0.999772751739274	-5.15507133160388
P49354	FNTA	-0.0694488455134645	3.31619112339567	-1.20039476637249	0.296219620911684	0.999772751739274	-5.15544360158451
Q15560	TCEA2	0.00765658844695421	3.36320672384864	0.0354834280451987	0.973394551317348	0.999772751739274	-5.155591924666
Q8TDP1	RNASEH2C	0.0686225005249168	3.31187681661633	0.944150009869015	0.398557462842147	0.999772751739274	-5.15563635245774
Q96C24	SYTL4	0.0473107351111226	3.34810185642856	0.332013828847635	0.756548894261299	0.999772751739274	-5.15579335603604
Q96DX4	RSPRY1	0.0835010142399685	3.32927077743101	0.40927959043117	0.703303515026422	0.999772751739274	-5.15616720492617
Q9UJ14-1	GGT7	-0.0987631800740492	3.32487547040651	-0.812283667398705	0.462207712180417	0.999772751739274	-5.15622321580375
Q7L8A9-1	VASH1	-0.00916484695047673	3.31738909291874	-0.0555354729155034	0.958375362019248	0.999772751739274	-5.15656365130779
Q9HCP0-1	CSNK1G1	0.0864515086419694	3.28843645544221	0.503337688838211	0.641183087533885	0.999772751739274	-5.1565941061836
Q13352-5	ITGB3BP	-0.063226506130105	3.34424996509368	-0.644887622259036	0.55412666029229	0.999772751739274	-5.15673917004581
Q9Y664	KPTN	0.0707324108524855	3.29537316375335	0.962863271600217	0.390146669372115	0.999772751739274	-5.15680116059428
Q16739	UGCG	0.0540301832153974	3.32962119325463	0.495350266247261	0.646333107698995	0.999772751739274	-5.15776177497347
Q86Z02	HIPK1	0.0535164735789627	3.34563493357455	0.437908723093399	0.68406326306187	0.999772751739274	-5.15856225596967
Q96F44-1	TRIM11	0.0702486597804949	3.30883890848497	1.3141189859688	0.259104971179601	0.999772751739274	-5.15869133960136
Q9H9J2	MRPL44	-0.0895274417553784	3.30152221693557	-1.26019897835309	0.276110230801218	0.999772751739274	-5.1587267604515
Q9BWT1-2	CDCA7	-0.104220214850444	3.34246895077062	-1.05414616586617	0.351284131455693	0.999772751739274	-5.15890445260094
P33240	CSTF2	-0.186946751234984	3.33760129482676	-1.33488946909418	0.252829036334326	0.999772751739274	-5.15891649295469
Q99501	GAS2L1	0.0311680724360514	3.32278058450731	0.226166951679216	0.832159402690631	0.999772751739274	-5.15919528631644
Q7Z398	ZNF550	-0.0144163761262374	3.30698459587779	-0.0832023337212481	0.937688421707497	0.999772751739274	-5.15931151769123
Q9BQC3	DPH2	-0.0605323563308924	3.30809572497074	-1.34974021442029	0.248433100694674	0.999772751739274	-5.15931513385814
Q9ULW0	TPX2	-0.00649863414326714	3.32442805413617	-0.038244271037791	0.971325688735634	0.999772751739274	-5.15945845373052
Q8NFW9	MYRIP	0.0656152945613885	3.3169312237892	1.12254024599235	0.324461031034828	0.999772751739274	-5.15949837856048
Q674X7-1	KAZN	0.0536313576356717	3.32783082192817	0.490721824812418	0.649328393063057	0.999772751739274	-5.1599236764756
Q8N165	PDIK1L	-0.00766507571091365	3.31042070080281	-0.0616209403086837	0.953821068625921	0.999772751739274	-5.15995254322505
Q8N6G5-1	CSGALNACT2	0.036556452205416	3.3385186357761	0.188697950240547	0.859517431486044	0.999772751739274	-5.16003854510331
Q86UL3	AGPAT6; GPAT4	-0.184780690361057	3.38522540785646	-1.08153110482529	0.340312805545431	0.999772751739274	-5.16017888701338
Q6ZVD8-1	PHLPP2	-0.0362436862298075	3.35123013723288	-0.309256439564354	0.77256728060591	0.999772751739274	-5.16031534184587
Q9NSK7-4	C19orf12	0.00900303064416296	3.32370636889655	0.0565019478780416	0.957651929487677	0.999772751739274	-5.16034913154075
O00308	WWP2	-0.0823810986575738	3.32265382111873	-1.06983404875299	0.344960872606312	0.999772751739274	-5.1604573639131
Q8WUJ0	STYX	0.0267503966794257	3.35108408407325	0.184616745833334	0.862512664896192	0.999772751739274	-5.16094389775601
Q96CB8	INTS12	-0.0682074368728072	3.30767231827861	-1.46832538148743	0.21594001306661	0.999772751739274	-5.16094763512287
Q96JY6-5	PDLIM2	-0.051311320039754	3.31549426787679	-0.339147065072129	0.75155776107961	0.999772751739274	-5.16097552623071
O14933	UBE2L6	0.152346686090517	3.27497977335011	0.830625976957182	0.45289113738447	0.999772751739274	-5.16110903537846
Q9Y4A0	JRKL	-0.0364606736730321	3.33429194272872	-0.292621355980868	0.784364244803298	0.999772751739274	-5.16170250469298
Q9H9V9	JMJD4	-0.0601976978194712	3.29866768258499	-0.553200548665817	0.609590632275387	0.999772751739274	-5.16170937555254
Q96CX6	LRRC58	-0.090476983029564	3.31351415920643	-1.30907004034	0.260653307764642	0.999772751739274	-5.16255968275574
Q9Y2L6	FRMD4B	0.0339854374242763	3.31244699502016	0.281917959993713	0.791992164349535	0.999772751739274	-5.16260319396952
Q8NCK3	ZNF485	0.0505241977704585	3.38362033054355	0.41922639948221	0.696587180359211	0.999772751739274	-5.16278679115543
Q15831-1	STK11	-0.00801705227372343	3.32965422014244	-0.0641744552284281	0.951910670628714	0.999772751739274	-5.16294286136199
Q9BTX1	NDC1; TMEM48	0.212660452946038	3.38356344406449	1.23295786608932	0.285103906443217	0.999772751739274	-5.16311591561103
O00189	AP4M1	0.0432855167910783	3.34536708133864	0.346349337124987	0.746533187553965	0.999772751739274	-5.16316995276798
Q13608	PEX6	0.0777535529108608	3.34878559720659	0.875204010804087	0.430874032627392	0.999772751739274	-5.16326532330095
P23142	FBLN1	-0.128934084059683	3.38689502049204	-0.608581810771518	0.575670385335092	0.999772751739274	-5.16327650978666
Q9BQ04	RBM4B	0.0709982020272238	3.34991089160493	0.949911246615988	0.395951747592333	0.999772751739274	-5.16331917701442
Q96F85-1	CNRIP1	-0.0704682537047642	3.31336911602184	-1.3652344357038	0.243926649897564	0.999772751739274	-5.1636931471816
Q13418	ILK	0.0738887605520823	3.28211534407021	1.49851954030073	0.208370342206348	0.999772751739274	-5.16380946955936
Q92925-1	SMARCD2	0.0544020718434136	3.32262530525661	1.49538158495664	0.209144348133116	0.999772751739274	-5.16384651101757
P13051	UNG	0.0285636650345149	3.36157017429994	0.0573958095091034	0.956982893890768	0.999772751739274	-5.16393147336596
Q9NYZ1	FAM18B1; TVP23B	0.109973601415794	3.31880689861866	0.547370290920432	0.613234089560273	0.999772751739274	-5.16448741388433
Q8TDM6-1	DLG5	0.0662078953517432	3.31238619939465	1.34114687025648	0.250967587768789	0.999772751739274	-5.1650869122662
Q9H5X1-1	FAM96A	0.064141292355161	3.28100931925098	0.657665632425596	0.54667775961953	0.999772751739274	-5.16515004486135
Q9BSM1	PCGF1	0.0871281858685377	3.29433308065147	0.92899674395453	0.405480465893041	0.999772751739274	-5.16561503983677
P49802-1	RGS7	0.103830737951805	3.30416417014974	1.14749563694382	0.315147901275747	0.999772751739274	-5.16579061546678
Q8N2K0-2	ABHD12	0.0951150812499653	3.33818671469232	1.0924392257753	0.336029179090072	0.999772751739274	-5.16600868372948
Q8WWW0-2	RASSF5	-0.0619023574888401	3.3071025825063	-0.386441478520846	0.718847857919681	0.999772751739274	-5.16692174572282
Q9NW07	ZNF358	-0.0677675303152622	3.32797943438095	-0.987861504197573	0.379148637072383	0.999772751739274	-5.16694778540019
O43808	SLC25A17	0.231334314989819	3.32158403180495	0.648593690827474	0.551959009573088	0.999772751739274	-5.16744519215744
Q96DC7-2	TMCO6	0.0546578613469216	3.31157597024945	0.454210809398244	0.673234205166612	0.999772751739274	-5.16770339359263
Q99836-6	MYD88	-0.0722727817719752	3.3205075091676	-0.664439048988715	0.54275769060641	0.999772751739274	-5.16783253190754
O15055-1	PER2	0.0478273732974081	3.33070929163144	0.372605744041211	0.728346203306069	0.999772751739274	-5.16831297339755
Q15131-1	CDK10	-0.074879157368071	3.36825020916539	-0.60576423760833	0.577365551602263	0.999772751739274	-5.16900245801372
O43313	ATMIN	-0.0298848370830539	3.31799200829291	-0.23784609152228	0.823688031603911	0.999772751739274	-5.16908017550394
Q8N2K1-3	UBE2J2	0.0607457572065184	3.32943840709311	0.62521272229129	0.565732437777599	0.999772751739274	-5.16941711054345
P22466	GAL	0.00885201067316792	3.28788896311405	0.0632210297900673	0.952623925672041	0.999772751739274	-5.16996525253887
Q6ZMG9-2	CERS6	0.117913154484022	3.34927052279535	0.662419315205503	0.543924527760792	0.999772751739274	-5.17028313923356
Q9H1J1-1	UPF3A	-0.0808873906310082	3.33358327676425	-0.680450361240038	0.533570123280888	0.999772751739274	-5.17033277389159
Q8N8R3-1	SLC25A29	-0.021645197936071	3.33896114990065	-0.137078023430091	0.897592528811572	0.999772751739274	-5.17051380376456
[truncated: 6,469 more rows]
