# Supplementary material for: Thalidomide promotes degradation of SALL4, a transcription factor implicated in Duane Radial Ray syndrome
Source: eLife journal article supplement (doi:10.7554/elife.38430), 2018-08-01
Supplement: supp [file elife-38430-supp-v1.zip › elife_poa_e38430_Figure_1_source_data_7.csv]

	ID	logFC	AveExpr	t	P.Value	adj.P.Val	B
Q96JP5-1	ZFP91	-0.687498538051271	3.5590778541556	-21.7701727823507	1.82910546804187e-06	0.0122952469561774	0.714021475561792
Q9UKT9-1	IKZF3	-0.344803195608582	3.9406606760636	-10.4060374858333	8.9855292069456e-05	0.302003636645442	-0.114969352449537
P63098	PPP3R1	-0.226275763334682	3.40250634688043	-6.35709677898542	0.00107176134314301	0.999905554516238	-0.897126641632854
Q13422	IKZF1	-0.305221991163346	3.86004786678057	-6.4077706678202	0.00103130493601092	0.999905554516238	-1.59875801592491
P51157-1	RAB28	-0.494846348884396	3.77583162276214	-9.31217490101134	0.000159149586236628	0.356601172894205	-1.67308113162031
Q9NX63	CHCHD3	-0.119412394036821	3.35841251997893	-3.93281810913832	0.00950125481592697	0.999905554516238	-2.18458851787368
P02751	FN1	0.470339294198588	3.39186520784331	4.37905544918852	0.00600347334117397	0.999905554516238	-2.19076030902043
Q9Y5J7	TIMM9	-0.307757801598108	3.26641474536154	-5.26447711050998	0.0026206610672228	0.999905554516238	-2.25791526382547
Q9UK99	FBXO3	0.131024989665923	3.41708191252996	3.9398886082453	0.0094302071932877	0.999905554516238	-2.30678884101693
Q99417	MYCBP	-0.253356827790814	3.3093393750581	-3.92093811147334	0.00962200268066508	0.999905554516238	-2.31242049522441
P60953	CDC42	-0.115725731414737	3.27065804629501	-3.76174604763218	0.0114199395368208	0.999905554516238	-2.34833140660946
Q15306	IRF4	-0.0714314863327359	3.44745502182298	-3.77143579347132	0.0113002189954779	0.999905554516238	-2.42164992793295
O60232	SSSCA1	-0.0896636711420239	3.30604603879528	-3.37562952886055	0.0175883079620002	0.999905554516238	-2.73423729736379
P12814-3	ACTN1	0.352584379802538	1.89319774079065	3.41495967059133	0.0168133603431729	0.999905554516238	-2.75507939840263
Q9Y2J2	EPB41L3	0.281276380816868	1.97214084059198	4.12692366905028	0.00775321856488215	0.999905554516238	-2.75886744269738
Q96BR5	SELRC1; COA7	-0.099045588187263	3.26059817805847	-3.2711145519548	0.0198490780539077	0.999905554516238	-2.83105550020393
Q9Y5J9	TIMM8B	-0.322237383808927	3.3443729832331	-4.04472843765993	0.00844447328923895	0.999905554516238	-2.84199063233335
P15170-3	GSPT1	-0.0646645244787008	3.33445148554653	-3.12548636965861	0.0235587175995778	0.999905554516238	-3.05090886717971
O14530	TXNDC9	-0.0687799222205928	3.30354564510714	-3.06498544103276	0.0253212645474872	0.999905554516238	-3.05520391672812
P80723	BASP1	-0.345685684988273	3.32419808843935	-3.13566768709918	0.0232757019783011	0.999905554516238	-3.11522129195056
P04637	TP53	0.269932245412745	1.68571405451212	3.35943940150706	0.0179188639945326	0.999905554516238	-3.116814943676
Q8NCM8-2	DYNC2H1	0.210793110701435	2.4230489686424	3.60649342666751	0.0135475666587634	0.999905554516238	-3.1279603060892
P58546	LUZP6; MTPN	-0.320068833132358	3.38624997159607	-2.92539912478985	0.029971115165913	0.999905554516238	-3.17736414424062
O43504	LAMTOR5	-0.214273389506142	3.28741573281861	-2.91503776219788	0.0303520859582099	0.999905554516238	-3.18602026625233
Q15121-2	PEA15	-0.269730291661761	3.38498093553772	-2.90604336404741	0.0306871170819437	0.999905554516238	-3.19360903308683
P20674	COX5A	-0.132266422579561	3.16159644474598	-2.8917433704717	0.0312281769255339	0.999905554516238	-3.20770582404012
P56211	ARPP19	-0.196203528697091	3.3881903250707	-2.90847139932747	0.0305962765937587	0.999905554516238	-3.21641550061865
P20839-6	IMPDH1	-0.064575111761212	3.36368826571019	-2.90280639064123	0.0308086840015413	0.999905554516238	-3.26727943748725
P51159-1	RAB27A	-0.166837897254349	3.27568425717211	-2.83437970473499	0.033506344757675	0.999905554516238	-3.2688413339713
Q9NX18	SDHAF2	0.702987548128847	3.4997930406381	3.97864466533065	0.0090513217033756	0.999905554516238	-3.29012182168128
Q9BWJ5	SF3B5	-0.301986804830142	3.24679743720583	-2.79057908176333	0.0353685306219951	0.999905554516238	-3.33193688133219
Q9BQ95	ECSIT	0.112186563324184	3.21853690526032	2.77574415936722	0.0360246698131657	0.999905554516238	-3.34299370278994
Q8N4Q1-2	CHCHD4	-0.24823525146685	3.32216147345733	-2.85421586615208	0.0326985712282328	0.999905554516238	-3.34556328969395
Q8WU39-1	MZB1	0.0873611924179337	3.42904801187608	3.08455130253799	0.0247357663649605	0.999905554516238	-3.37087879751703
Q9NX24	NHP2	0.217142469682577	3.36039571853731	2.74592691652156	0.0373840532936595	0.999905554516238	-3.38236169593509
P62158	CALM3; CALM2; CALM1	-0.312195263379595	3.18917648935397	-2.76876608328883	0.0363378955146101	0.999905554516238	-3.40663463005891
P07602-3	PSAP	-0.100750187744233	3.30766719422186	-2.76522200837279	0.0364981168400376	0.999905554516238	-3.41509308952223
Q9UI26-2	IPO11	0.0742510409222584	3.32071606546492	2.69047089174345	0.0400634947094592	0.999905554516238	-3.43444093117482
P49327	FASN	-0.0343687731363404	3.27354947750588	-3.24601224171051	0.0204392231244184	0.999905554516238	-3.48022296195016
O43298	ZBTB43	0.272880850119397	3.46779681234549	3.23309855319843	0.0207504174226391	0.999905554516238	-3.54558876749651
Q92506	HSD17B8	0.0990948125504926	3.36533600745515	2.54553192491236	0.0481030362831638	0.999905554516238	-3.55540737950137
P05091	ALDH2	0.289700142956504	1.80625755468537	2.65363683334406	0.0419583163098636	0.999905554516238	-3.56517986031918
Q9Y5R8	TRAPPC1	0.238621114185627	3.3779504422815	2.56535892196931	0.0469069481219703	0.999905554516238	-3.58177277453676
Q8IZH2-1	XRN1	0.0450058500700004	3.37018045504126	2.7146578010191	0.0388699870753862	0.999905554516238	-3.59138963150339
Q9Y5Y6	ST14	-0.0769282205149238	3.49300441175693	-2.59321936820962	0.0452801823414749	0.999905554516238	-3.62830877199982
O00231-2	PSMD11	-0.0587276205688321	3.32880541559779	-2.83601204357356	0.0334390530116546	0.999905554516238	-3.63555871640038
O43805	SSNA1	-0.216499584961124	3.40282177545149	-2.99273015931958	0.027620131875315	0.999905554516238	-3.63914250307752
Q9Y624	F11R	-0.118191311249851	3.31469313305888	-2.44828028283365	0.0544649860836877	0.999905554516238	-3.6516154904409
P34932	HSPA4	-0.0327731819284898	3.26137524258668	-3.01898241905482	0.0267592384804554	0.999905554516238	-3.65440580035343
P62072	TIMM10	-0.156121404303245	3.33728933259182	-2.44300697209575	0.054834843291928	0.999905554516238	-3.6561141635994
Q9BPU6	DPYSL5	0.266248703267994	1.69202749734497	2.43323064915772	0.0555276648399289	0.999905554516238	-3.68301135870172
Q8TCZ2-5	CD99L2	-0.202578078726651	3.24405937469223	-2.52316845457355	0.0494917334447207	0.999905554516238	-3.68310313696434
Q16537	PPP2R5E	-0.0945994761073288	3.34438434696531	-2.40934305857751	0.0572602186445051	0.999905554516238	-3.68778457779133
O15533-3	TAPBP	-0.131991964682983	3.3049237939693	-2.42738758122844	0.0559462156861928	0.999905554516238	-3.69075659977868
O43924	PDE6D	-0.142131680818798	3.43992447903363	-2.518041454095	0.0498161499317958	0.999905554516238	-3.70086450803209
Q8NE01	CNNM3	-0.0823141356442193	3.3272227809411	-2.41625624298282	0.0567529428816393	0.999905554516238	-3.70201806472596
Q08722	CD47	-0.128574151739298	3.37684622548427	-2.38173171536449	0.0593350920643461	0.999905554516238	-3.70916783496275
O00592	PODXL	-0.196823942197901	3.2996305028979	-2.69575104860611	0.0397995817543303	0.999905554516238	-3.71622212045476
Q8WUX1-1	SLC38A5	-0.120132336417374	3.41573217231166	-2.40483911912485	0.0575933134610795	0.999905554516238	-3.73410995975666
O14757	CHEK1	-0.0878113403566143	3.31962352740928	-2.36793922811794	0.0604014384101468	0.999905554516238	-3.7359400134973
Q9UK76	HN1; JPT1	-0.0888913097495483	3.12419512653593	-2.36992334144538	0.0602467903240535	0.999905554516238	-3.73716331329321
P21397	MAOA	0.307328518263003	1.39217338061554	2.78382912797518	0.0356654428853922	0.999905554516238	-3.7418060817107
Q9P0M6	H2AFY2	0.176989486678927	2.05620734918219	2.35147237229104	0.0617013451139639	0.999905554516238	-3.74522935411475
Q9UHA3	RSL24D1	-0.100592573171667	3.2911815052689	-2.3349297358135	0.0630372398777744	0.999905554516238	-3.75814366727864
O15514	POLR2D	-0.147590422199708	3.29388540879178	-2.34644526670178	0.0621040947035966	0.999905554516238	-3.76050419744841
Q9UBL3-1	ASH2L	-0.0449049036555186	3.31182120775687	-2.53432167309463	0.0487938323944953	0.999905554516238	-3.76303828852358
P43007-1	SLC1A4	-0.141604354711891	3.34700348215014	-2.4634363611948	0.0534167793674091	0.999905554516238	-3.76855634162867
P36405	ARL3	-0.0757186042030465	3.33858874089309	-2.39600741354682	0.0582524959361494	0.999905554516238	-3.78069178171079
P07196	NEFL	0.394684204983792	1.13759691960145	2.50252751138526	0.0508118288308825	0.999905554516238	-3.78781035089765
P01023	A2M	0.186152299397725	3.0152917489216	2.56381585886029	0.0469988738219199	0.999905554516238	-3.7908502215171
Q7Z7K0	CMC1	-0.148948866009867	3.20700407694531	-2.45064753976342	0.0542998223551287	0.999905554516238	-3.79286344277773
Q96SZ6	CDK5RAP1	0.153367965280968	3.189354635865	2.34685923224509	0.0620708242100621	0.999905554516238	-3.83586030765986
P13804-1	ETFA	0.140153703309226	2.00069261770575	2.24297044874351	0.0710443019873956	0.999905554516238	-3.84218054320486
O14654	IRS4	0.344651300040395	1.05123682578005	2.24424446215053	0.070926307707556	0.999905554516238	-3.84738818530773
P43246-1	MSH2	-0.0425686948586483	3.28660359331317	-2.5725189298726	0.0464829342887594	0.999905554516238	-3.86111719104933
P31949	S100A11	-0.113936824824443	3.41008028807851	-2.29766739833956	0.0661601409844562	0.999905554516238	-3.86278357373854
Q92466	DDB2	0.0865152404810384	3.39563098715317	2.24019538986048	0.0713020343265853	0.999905554516238	-3.86513828793776
P84090	ERH	-0.0701689038015586	3.24737221185521	-2.46430943507696	0.0533570593622147	0.999905554516238	-3.86913370314729
P57081-1	WDR4	-0.0895891805880398	3.29579404801514	-2.24946521507973	0.0704449357905452	0.999905554516238	-3.87144758791363
O60285	NUAK1	-0.138803973503468	3.52610951563736	-2.34143896814563	0.0625079564531072	0.999905554516238	-3.88638935961912
Q14247-1	CTTN	0.104652074258991	2.47942943402681	2.22949967012651	0.0723046490601635	0.999905554516238	-3.88722690746946
Q6DKI1	RPL7L1	-0.116800063142362	3.24114116394975	-2.21050797689777	0.0741216788033743	0.999905554516238	-3.90194010287003
P98179	RBM3	0.0715873065343561	3.28115690180535	2.212765195467	0.0739032265705794	0.999905554516238	-3.91420029965593
Q71RC2-4	LARP4	-0.0824575393459999	3.22234640464999	-2.23164079379477	0.0721027579748224	0.999905554516238	-3.91717508739461
O43837-1	IDH3B	0.0653588713652858	3.32748510849403	2.3772688514213	0.0596779194772999	0.999905554516238	-3.92355087934425
Q16822-1	PCK2	0.0922912558923144	2.99906431638157	2.15125995415482	0.0801048220028231	0.999905554516238	-3.92575585078058
P18859-2	ATP5J	-0.218363628244957	3.33914163470555	-2.27580837040321	0.0680680541089189	0.999905554516238	-3.94289365718793
Q13164-1	MAPK7	0.21590542356003	3.33441072887016	2.13524907936729	0.081806977759813	0.999905554516238	-3.94643713284281
O60716-1	CTNND1	0.156261783917828	1.80685214526839	2.15704197078359	0.0794992555415588	0.999905554516238	-3.95005902448999
Q6ZU80	CEP128	0.0697011255593716	3.361449698213	2.16188085255677	0.0789961475927755	0.999905554516238	-3.95403137088214
O60313-2	OPA1	-0.0750826967083211	3.33131286437044	-2.44187844658635	0.0549143442276608	0.999905554516238	-3.95898729514997
P07437	TUBB	0.0755485042856273	3.36434370134098	2.37400066034777	0.0599303135998339	0.999905554516238	-3.96217809468264
P53985	SLC16A1	-0.236819837487294	2.96407727310604	-2.11125985147974	0.084428322693495	0.999905554516238	-3.96455648237953
O94826	TOMM70A; TOMM70	-0.132233578336853	3.09067808035847	-2.39523933214047	0.0583102036150237	0.999905554516238	-3.96978061543994
O43765	SGTA	-0.117839167813193	3.30269625268457	-2.16335549688627	0.0788434892719345	0.999905554516238	-3.97244960857726
O60613-1	SEP15; SELENOF	-0.108145413064773	3.28474517623255	-2.10084118496699	0.0855939086599736	0.999905554516238	-3.97855366095292
O95630	STAMBP	0.0642195707779628	3.38931404442081	2.17985113101168	0.077156731796131	0.999905554516238	-3.97915854569671
P05783	KRT18	0.159105098486577	1.94527373711331	2.11737871623371	0.0837514918345727	0.999905554516238	-3.98787912730353
P09497-2	CLTB	-0.0764513239027569	3.39441917599621	-2.1820630153176	0.0769334480400097	0.999905554516238	-3.98955238642646
Q96IZ5	RBM41	-0.134620762635282	3.34908177509672	-2.11432366800886	0.084088712857063	0.999905554516238	-3.98963322781799
P05534	HLA-A	-0.143690079383007	3.32236478057704	-2.25558417152902	0.0698851298169382	0.999905554516238	-3.99222959486024
Q9NZ09-4	UBAP1	-0.0796380842587305	3.34308414071101	-2.07829364095562	0.0881740735443357	0.999905554516238	-4.00123110779713
Q6P3S1	DENND1B	0.105955417499182	3.40166687360241	2.06539091900999	0.0896867670214456	0.999905554516238	-4.00139150575813
P0DOX8		0.135852190519897	3.48727979719707	2.62256417858761	0.0436324903063272	0.999905554516238	-4.02209322900019
Q9ULZ3	PYCARD	-0.0958825801700006	3.41543540537782	-2.06637387924577	0.0895705848814507	0.999905554516238	-4.03733176495564
Q9NVQ4-2	FAIM	-0.11439264646453	3.25356116000623	-2.03906844867087	0.0928567386041012	0.999905554516238	-4.04062472748286
Q8N0X7	SPG20; SPART	0.164537812456586	1.83802784788366	2.07588956028155	0.088453904146713	0.999905554516238	-4.04186312346106
Q14498-2	RBM39	-0.0374537359436207	3.28732836314926	-2.35107286968826	0.0617332496716113	0.999905554516238	-4.05183506541594
P48539	PCP4	-0.0997169554995902	3.4192392014842	-2.06519919143906	0.089709446689055	0.999905554516238	-4.05488810564471
P62993	GRB2	-0.0522725813938636	3.3060876417708	-2.23731552216904	0.0715705430874634	0.999905554516238	-4.0571436745592
Q9UMX5	NENF	-0.0765368943545565	3.20771936983691	-2.01308035199568	0.0961001862520124	0.999905554516238	-4.05724439680081
Q9H845	ACAD9	0.100247791446691	3.29937548237438	2.21672804457802	0.0735213405957605	0.999905554516238	-4.06172335249705
P13987	CD59	-0.123192347538718	3.36646983870318	-2.01772868915858	0.0955115778960451	0.999905554516238	-4.06940586960769
O00411	POLRMT	0.0681757329698761	3.20687593124783	2.13084545713129	0.0822817306859052	0.999905554516238	-4.07065637238534
P67936	TPM4	0.0781954160454875	3.42007580514912	2.342726677167	0.0624038100260045	0.999905554516238	-4.07148834010296
Q68DK2	ZFYVE26	0.113470221508072	3.30631684025075	1.97609246624733	0.100919030977384	0.999905554516238	-4.07909389118555
Q9H7Z7	PTGES2	-0.0644394629061576	3.34079765399743	-2.11336256594397	0.0841950931083538	0.999905554516238	-4.08908822031275
P54105	CLNS1A	-0.0574742895561359	3.24900079759833	-2.14717378892133	0.080535684726112	0.999905554516238	-4.08947548360719
Q9Y2A7-2	NCKAP1	0.104357026701801	2.74313012869551	1.98807465112295	0.0993313408183736	0.999905554516238	-4.08956077589198
Q99808-2	SLC29A1	-0.27175383932763	3.20446253906311	-2.00578165982188	0.0970319580154167	0.999905554516238	-4.09181558858574
P62888	RPL30	-0.0554876618093204	3.29131087620169	-2.12184236172571	0.0832613195324226	0.999905554516238	-4.097171883534
Q9UL25	RAB21	-0.0651722739607005	3.31167617109264	-2.00950901400615	0.0965549559664041	0.999905554516238	-4.09756637405081
P13796	LCP1	0.054522161039862	3.44551334961101	2.81188783316646	0.0344488140382204	0.999905554516238	-4.10435734014187
Q9Y3D0	FAM96B	-0.137467720469025	3.30735007059795	-1.94509624735004	0.105148050660928	0.999905554516238	-4.10549367727101
P62136-1	PPP1CA	-0.076818546693367	3.39686291658042	-1.94578266933683	0.105052459515248	0.999905554516238	-4.11085645782415
O95573	ACSL3	-0.108380643428244	3.19921769718604	-2.03350174771859	0.0935418481518987	0.999905554516238	-4.11241768290203
Q12923-4	PTPN13	0.0909462305091547	2.84446438724438	1.93268163535498	0.106892340195783	0.999905554516238	-4.11611581118409
Q13233	MAP3K1	-0.12001328690842	3.36721961203369	-1.93525121640519	0.106528895812602	0.999905554516238	-4.11633713639305
Q9NX08	COMMD8	-0.0936942303433652	3.40636689043852	-1.92121218061542	0.108530091328506	0.999905554516238	-4.12625681511351
Q14135-1	VGLL4	-0.0920495874324061	3.33087769291707	-1.92075562928627	0.108595810673407	0.999905554516238	-4.12867373996346
Q9HD34	LYRM4	0.116261061963676	3.32901228646781	1.94354167070422	0.10536487005269	0.999905554516238	-4.12907473605671
P54802	NAGLU	0.107095092927132	3.39682029842088	1.92648212586308	0.107774426836329	0.999905554516238	-4.13615271057569
Q92556-1	ELMO1	-0.0617257298869124	3.38802929201689	-2.30786209158453	0.0652897611314817	0.999905554516238	-4.13779325798145
P49368-1	CCT3	-0.029180489862351	3.27159350820358	-2.62144673472654	0.0436940309616573	0.999905554516238	-4.14314168740338
Q96HP4	OXNAD1	0.10521048324325	3.27703459845369	1.89760033727211	0.11198268196478	0.999905554516238	-4.14509359579491
P19397	CD53	-0.203395375050263	3.2755209831567	-1.90019569655055	0.111597774843883	0.999905554516238	-4.1458976246189
Q9BVC6	TMEM109	-0.154795089546838	3.22398157909604	-1.92303825413737	0.108267638203941	0.999905554516238	-4.15577256797762
Q2NKJ3-1	CTC1	0.124205823253989	3.40092923756642	1.89196068707452	0.112823734825462	0.999905554516238	-4.15773636899863
P06737-1	PYGL	0.189391962848437	2.09132380726516	2.1482048912078	0.0804267328674655	0.999905554516238	-4.164651289593
O96033	MOCS2	-0.170628036819543	3.31133221620467	-1.91463317051815	0.109481052507058	0.999905554516238	-4.16645540824022
Q9BTT4	MED10	-0.124042783036638	3.31369841007796	-1.87107359364639	0.115994932863768	0.999905554516238	-4.16691817415959
Q8N5C7-1	DTWD1	-0.243667020668732	3.52512534609758	-2.34793758064047	0.0619842460916473	0.999905554516238	-4.16937491524028
Q8IXI1	RHOT2	-0.125758257442842	3.06896432641402	-1.85607211882324	0.118328155528466	0.999905554516238	-4.17918512259204
Q9Y6K1	DNMT3A	0.131089553178797	3.10356951563068	1.86359560797064	0.117152126197396	0.999905554516238	-4.17979303584251
Q9H3S1-1	SEMA4A	-0.146680998294205	3.54990358490333	-2.28397398440382	0.0673486133793428	0.999905554516238	-4.18595540624139
P24666-1	ACP1	0.160749533657102	3.40885971783262	1.87584718912515	0.115262297282526	0.999905554516238	-4.18714126621357
O60927	PPP1R11	0.12106786728569	3.34202193839412	1.86632506127749	0.116728403640543	0.999905554516238	-4.1927312344021
Q13137-4	CALCOCO2	-0.0718176653937274	3.25479489149885	-1.94326411904082	0.105403628718721	0.999905554516238	-4.19553197564837
Q9NR12-1	PDLIM7	0.104999357300887	2.66388360097699	1.83386675195915	0.121869215921064	0.999905554516238	-4.20195121851451
Q9P0J1-2	PDP1	0.120831828918463	3.23427837157877	1.83768860124236	0.121252217150771	0.999905554516238	-4.20328893323511
Q15043	SLC39A14	-0.216725475145834	3.15063646724953	-1.84954981214917	0.119357343788933	0.999905554516238	-4.21257746026537
P07919	UQCRH	-0.22769661090818	3.27234726288364	-1.88504277666775	0.113864187723445	0.999905554516238	-4.21872957811664
O43464	HTRA2	-0.104591270039688	3.35727591432455	-1.80913493995568	0.125939087874649	0.999905554516238	-4.21900745420523
P26641-2	EEF1G	-0.0348103338215141	3.29458201530841	-2.4782729044986	0.0524116011481016	0.999905554516238	-4.22382273045342
Q9HD47	RANGRF	-0.139291808710179	3.29204161238574	-1.8189927821682	0.124300735234684	0.999905554516238	-4.22884846540463
Q14739	LBR	-0.137086673680329	3.17521680448939	-1.87503936420975	0.115385949038944	0.999905554516238	-4.2330999352398
Q96CX6	LRRC58	-0.120324608442036	3.33520538328625	-1.79339194494142	0.128600642012606	0.999905554516238	-4.23394463294373
O94901-9	SUN1	-0.268783433519199	3.02458438081664	-1.81198042317557	0.125463958212298	0.999905554516238	-4.2340359851581
Q9BSY4	CHCHD5	-0.089515610339383	3.28625413067065	-1.78513085654504	0.130019776495047	0.999905554516238	-4.23654659439721
P17174	GOT1	-0.0451110599063991	3.36554922121999	-2.20185156541211	0.0749657540581731	0.999905554516238	-4.23752763755774
P14621	ACYP2	-0.111132346003069	3.33084294659484	-1.78259727731372	0.130458143309562	0.999905554516238	-4.24043865060999
P06746	POLB	-0.0672231663884902	3.27941649387933	-1.89910353258279	0.111759584993911	0.999905554516238	-4.24587269257663
Q9NYJ1-2	COA4	-0.21727152688104	3.24499974630873	-1.95191943759587	0.104201793382885	0.999905554516238	-4.24658536681237
Q969Z3-1	MARC2	-0.191211130521785	3.18810904116036	-1.7684567343739	0.132932072420802	0.999905554516238	-4.24748871319962
P21926	CD9	-0.102464143641434	3.3239219037213	-1.81044479694255	0.125720147968892	0.999905554516238	-4.25004296295267
Q9UK45	LSM7	-0.0827979280827798	3.35899148945769	-1.7923838284925	0.128772986845872	0.999905554516238	-4.25053050795328
Q92993-3	KAT5	-0.118970037711913	3.32305597921947	-1.76512430572867	0.133521884098589	0.999905554516238	-4.25369347953225
Q6ZN17-1	LIN28B	0.255460907227072	1.66514509864121	1.91773226447751	0.109032041214068	0.999905554516238	-4.25615477905969
P41440	SLC19A1	-0.199473320878705	3.32163363866464	-1.92270907380072	0.108314901904004	0.999905554516238	-4.25735957441536
Q12797	ASPH	-0.158455136147905	3.30824144355435	-1.85346748361711	0.118738074072504	0.999905554516238	-4.26244725699616
O60936-3	NOL3	-0.138034599395642	3.37194504886231	-1.7759331018551	0.131618271738695	0.999905554516238	-4.26713729448413
Q8NB46	ANKRD52	0.157416772005491	3.31850526683946	1.75256676273987	0.135768019460088	0.999905554516238	-4.2718656534723
O76031	CLPX	0.0635054676946954	3.21376740399084	2.03606147447594	0.0932261689305992	0.999905554516238	-4.27294547953665
Q9H3G5	CPVL	0.685496379103234	1.06504840283976	1.81544308218446	0.124888204165318	0.999905554516238	-4.28170778423189
Q8NBX0	SCCPDH	0.160231237359578	3.33018339620595	1.74890406090863	0.136430224839939	0.999905554516238	-4.28231207199638
Q9Y5Q9	GTF3C3	0.065168475727899	3.25250602363443	1.95538007792534	0.103725198556668	0.999905554516238	-4.28384074446114
P09917	ALOX5	0.197687943129739	3.50702021243913	1.84525039989656	0.120040712050285	0.999905554516238	-4.28491570310023
O94927	HAUS5	-0.0683493673100319	3.24805281881746	-1.81311165316351	0.125275569912623	0.999905554516238	-4.28675062041721
Q99584	S100A13	0.341536735768809	1.47090891708451	1.75647233157037	0.135065432551068	0.999905554516238	-4.28741872401081
Q9Y3E1	HDGFRP3; HDGFL3	0.207823493218274	2.62563892636222	1.89877894360423	0.111807720628782	0.999905554516238	-4.29089581650295
P18827	SDC1	-0.126011020783548	3.36856380097123	-1.97636331835461	0.100882855546285	0.999905554516238	-4.29208755684402
P07197	NEFM	0.457622146658054	1.0651979849103	1.86557401249313	0.116844842091056	0.999905554516238	-4.29463925067152
Q9BPY3	FAM118B	-0.118317605870033	3.26543187033464	-1.73289293792093	0.13936293171178	0.999905554516238	-4.29868280254056
Q9NVA1	UQCC; UQCC1	0.0788271347166062	3.25078289817663	1.71052870111281	0.143564393256272	0.999905554516238	-4.29878483586824
Q99627-1	COPS8	-0.0632959403324642	3.34669451061855	-1.84675331257875	0.11980138412003	0.999905554516238	-4.30350566113592
Q96I59	NARS2	0.168717125253723	3.20476657752888	1.76257226780411	0.133975339157522	0.999905554516238	-4.30383732132523
Q9Y5S2	CDC42BPB	0.11130298147972	3.12597497145659	1.69268825203931	0.147005718466129	0.999905554516238	-4.30394967574281
Q9H467	CUEDC2	-0.0729933561354776	3.24196361718289	-1.75231330290142	0.135813740923486	0.999905554516238	-4.30719642893166
Q5U5X0	LYRM7	0.421019557972279	3.32398012686269	1.70133274131969	0.145328179783121	0.999905554516238	-4.31075394339597
P23443-1	RPS6KB1	0.0778502326791106	3.34777214134156	1.71516585304767	0.142683038690114	0.999905554516238	-4.31091352566191
Q14254	FLOT2	-0.0987723580211237	3.34601094057239	-2.02386665907485	0.0947400324228406	0.999905554516238	-4.31200740187947
Q9H6R6-1	ZDHHC6	0.157530110626081	3.23396332511441	1.74971734762766	0.13628290773744	0.999905554516238	-4.31247097597387
P42574	CASP3	-0.0574380568132154	3.40716590513935	-2.03061488756152	0.093899196629681	0.999905554516238	-4.31289144649504
Q9BUT9-1	FAM195A; MCRIP2	-0.12016410701338	3.39577638941775	-1.70995291287827	0.143674205269979	0.999905554516238	-4.31296505497494
Q96L73-1	NSD1	-0.194686370151324	3.23323477751421	-1.74710329419199	0.136756976598183	0.999905554516238	-4.3142773771911
Q9H8M1	COQ10B	0.125903539209574	3.31177724417473	1.70777630373279	0.14409007105016	0.999905554516238	-4.31700900641319
Q9Y244	POMP	-0.0942790452147716	3.3223853002757	-1.69394407386093	0.146760833194892	0.999905554516238	-4.31761956299964
Q86VI3	IQGAP3	0.069586544283579	3.19964924991889	1.8706301759394	0.116063226244498	0.999905554516238	-4.32191151870811
O75419-3	CDC45	-0.129051733600088	3.19179018432887	-1.67114789902948	0.151269357709347	0.999905554516238	-4.32256497193772
Q15003	NCAPH	-0.0475364257346372	3.21533945644223	-2.0085912523556	0.0966721803770979	0.999905554516238	-4.32558316809148
Q7Z403-1	TMC6	-0.147963758313027	3.38935021179701	-1.66732528100727	0.152038613767579	0.999905554516238	-4.32635096959643
Q96GJ1	TRMT2B	0.0997993896284177	3.21987257306213	1.65972488289867	0.153579540637623	0.999905554516238	-4.32720132465216
Q8IY63-1	AMOTL1	0.0972283757181045	3.25376620411172	1.65837857341917	0.15385408970978	0.999905554516238	-4.32811120503928
Q8N6F7-2	GCSAM	-0.123190323699533	3.35437444920785	-1.65698769703746	0.154138233042132	0.999905554516238	-4.33010310374809
Q08116-1	RGS1	-0.097125827573618	3.48783121938231	-1.66696200543091	0.152111918418507	0.999905554516238	-4.33176532521551
Q8IYD1	GSPT2	-0.0800884948862379	3.39820365674456	-1.77184206802975	0.132335561587682	0.999905554516238	-4.33504760937599
Q16527	CSRP2	0.269827655290702	1.70247891501279	1.64564414913724	0.15647490995314	0.999905554516238	-4.33723687597804
Q96AQ8-1	CCDC90A; MCUR1	0.0896924727921942	3.28564733045761	1.65029797028423	0.155512090774088	0.999905554516238	-4.33791961057093
Q96B01	RAD51AP1	-0.0943824297336734	3.32758752247881	-1.65331666949896	0.154890665347222	0.999905554516238	-4.33909815476055
Q8NCN5	PDPR	0.0783000355358714	3.26333492868138	1.78280963576891	0.130421343729955	0.999905554516238	-4.33969772705416
Q14674-1	ESPL1	0.050270813721992	3.26026630944057	1.88671347794504	0.113612025412833	0.999905554516238	-4.34075197835154
Q7Z7K6-1	CENPV	0.42125404980854	1.64372954150563	1.74895779631916	0.136420486425633	0.999905554516238	-4.34652936658253
P06241-1	FYN	0.313580670459522	3.18113236766706	1.79346129241986	0.128588795060518	0.999905554516238	-4.34905758048433
O15020	SPTBN2	0.104004873070382	2.88061158644903	1.80830467245906	0.126078063715502	0.999905554516238	-4.35508121980069
Q5BKY9-1	FAM133B	-0.173198398003288	3.31977740560323	-1.6809619118866	0.149311897939387	0.999905554516238	-4.35713571159321
Q96D46	NMD3	-0.057206626942368	3.29746530218866	-1.81627082984947	0.124750964223022	0.999905554516238	-4.35716347025959
O14657	TOR1B	-0.0543315445051334	3.37945744395378	-1.78924709397979	0.12931071647481	0.999905554516238	-4.35901174073205
Q96FJ2	DYNLL2	0.189577657151054	3.40614139680331	1.91732610433364	0.109090780573193	0.999905554516238	-4.35950180141322
O76070	SNCG	0.230707811067367	1.51376050119235	1.7413186858489	0.137811881684421	0.999905554516238	-4.36277243494704
Q8NAX2	C1orf172; KDF1	0.203133114550914	3.40041290865914	1.60988270678518	0.164070495756877	0.999905554516238	-4.36287096231468
Q9UH99	SUN2	-0.135476926754062	3.1747031742223	-1.80467465203725	0.126687492705501	0.999905554516238	-4.36414969244374
Q8TEQ8-1	PIGO	-0.160960571513728	3.18165904930958	-1.60445565248397	0.165254153622379	0.999905554516238	-4.36531934982493
Q13347	EIF3I	-0.0503359914193426	3.31989430891994	-2.17915436005545	0.0772272095891289	0.999905554516238	-4.37293705815905
P10515	DLAT	0.0767940630944062	3.22945889499002	1.838328877947	0.121149159525003	0.999905554516238	-4.37637226690962
O14727	APAF1	0.103291895998126	3.08276029965727	1.62876867427783	0.160015416652898	0.999905554516238	-4.37637831611839
Q9BXL5	HEMGN	-0.0609979326263274	3.37037209146467	-1.94946692085333	0.104540907449789	0.999905554516238	-4.37652325399398
Q8N6N3	C1orf52	-0.139284170977631	3.29410588119867	-1.58549358601932	0.169455312385954	0.999905554516238	-4.3773218449406
Q8NBT2	SPC24	-0.081987471400167	3.30715059887805	-1.62920334457962	0.159923247277864	0.999905554516238	-4.37805524299956
P46821	MAP1B	0.303873176663086	1.1667109485144	2.01122324554517	0.0963363917106204	0.999905554516238	-4.37818242256181
P49419-2	ALDH7A1	0.100950904722847	2.15208096311308	1.85705823874127	0.118173333276108	0.999905554516238	-4.38115773563437
O76003	GLRX3	-0.039242380699387	3.33222083383929	-2.0737773933035	0.0887005170844973	0.999905554516238	-4.38243643850096
O43148-2	RNMT	-0.0466409633446903	3.30506198091414	-1.95143691193375	0.104268424031217	0.999905554516238	-4.38262283857043
Q9UJ70-2	NAGK	-0.0436229381792774	3.4067942765986	-1.92134710510928	0.108510677072837	0.999905554516238	-4.38804527639007
Q13509	TUBB3	0.37185380541507	1.31050500664329	1.67058600085513	0.151382192574342	0.999905554516238	-4.39197144910483
Q9NSG2-1	C1orf112	-0.106943321167938	3.28150176968057	-1.5609393725633	0.17504934586652	0.999905554516238	-4.39343201659425
P82675	MRPS5	0.113013098018261	3.22586065557725	1.6853140704774	0.148451840303069	0.999905554516238	-4.39400097546167
Q7L0Y3	TRMT10C	0.0948941944617291	3.25407614125445	1.99391035195202	0.0985674033984012	0.999905554516238	-4.39405446767576
Q13127-1	REST	0.160872607069104	3.38035182006255	1.63678479918345	0.158323958656628	0.999905554516238	-4.39619977784869
Q9HAI6	CXorf21	-0.140153484374964	3.40500195844495	-1.57116820036198	0.172697623922255	0.999905554516238	-4.39748831080703
O95425	SVIL	0.113747325490204	3.19871290397964	1.55395659878805	0.176672468400264	0.999905554516238	-4.39783827446016
A8MXV4	NUDT19	0.0735841518980538	3.32660652487104	1.61650496635385	0.162637332186921	0.999905554516238	-4.39896754288629
Q9NX55-2	HYPK	-0.080660759493046	3.34006280260424	-1.71492314298787	0.142729035888432	0.999905554516238	-4.39932649770141
Q02108	GUCY1A3	0.117243421697646	3.35367541369874	1.54966257976409	0.177677785007439	0.999905554516238	-4.39964916950906
Q4AC94-5	C2CD3	0.111137071586017	3.38997449681591	1.54839162584778	0.177976395151009	0.999905554516238	-4.40044995572477
Q9BQ75	CMSS1	-0.125501038109045	3.26744829049506	-1.54361045792712	0.179104056727262	0.999905554516238	-4.40385522130471
Q9C005	DPY30	-0.131223662701073	3.36913160812918	-1.54376055669938	0.179068551028552	0.999905554516238	-4.40509048740904
Q14061	COX17	-0.286072470478281	3.31249694991977	-1.53453382834513	0.181263733835502	0.999905554516238	-4.40922581462275
Q8IZ40	RCOR2	0.240881247424686	1.56457924789072	1.53149190842196	0.18199309671983	0.999905554516238	-4.41105422412409
Q8TAE8	GADD45GIP1	0.0579878378372154	3.29862816561277	1.6853128483169	0.1484520811352	0.999905554516238	-4.41160950158623
Q9P0W2	HMG20B	-0.158295995673609	3.30531598705952	-1.53466841521688	0.181231528700523	0.999905554516238	-4.41418669532869
Q9NX07-1	TRNAU1AP	-0.130245535041594	3.26038332503902	-1.52443336695704	0.183696376937222	0.999905554516238	-4.41513232795086
Q96AY3	FKBP10	0.178725775334926	2.09095352128968	1.6032045466407	0.165528199204353	0.999905554516238	-4.4158520094639
Q8TD30-1	GPT2	0.125291618110814	2.84818096631297	1.54115276268028	0.179686384727812	0.999905554516238	-4.41791835505244
Q96DB5	FAM82B; RMDN1	-0.063853098511655	3.29712602680469	-1.63738481369205	0.158198056735317	0.999905554516238	-4.41870420939576
Q9BVC4	MLST8	-0.0563263797669809	3.34048306195845	-1.67156657756846	0.151185336587156	0.999905554516238	-4.41885066330848
Q9GZS3	WDR61	-0.0468628141398275	3.32634535539757	-1.88140219408851	0.11441563769094	0.999905554516238	-4.42699367578842
P15884-2	TCF4	-0.097710702651974	3.38318524220938	-1.50532317156034	0.188384664744719	0.999905554516238	-4.42701622554848
Q13216-1	ERCC8	0.103227475425875	3.27998504447803	1.50191011891627	0.189233915814122	0.999905554516238	-4.42861013834899
Q14315	FLNC	0.461552375433249	1.01336501824649	1.74494708983193	0.137149248163691	0.999905554516238	-4.42987848399986
Q53GQ0	HSD17B12	-0.0923975043095978	3.28700737290105	-1.75296461590151	0.135696281904997	0.999905554516238	-4.43014003806991
P29597	TYK2	-0.078741142177299	3.30721095579249	-1.62554299287461	0.160701026311898	0.999905554516238	-4.43452049744402
Q7Z2K6	ERMP1	-0.103651275672566	3.22331076627658	-1.6213088551672	0.161605332573817	0.999905554516238	-4.43461334023412
Q7Z6K3	PTAR1	-0.085023364096071	3.36736387877943	-1.58429707278587	0.169723852695427	0.999905554516238	-4.43541280393608
A4UGR9-8	XIRP2	0.22728988094384	3.41217395352102	1.71494282816147	0.142725304705328	0.999905554516238	-4.4391184852231
Q6ZSJ8	C1orf122	-0.0775212998660878	3.3307746646071	-1.53258777531721	0.181730016430296	0.999905554516238	-4.43960557821528
Q9Y6G5	COMMD10	-0.087760024382351	3.34969256036799	-1.64103561891632	0.157434110726198	0.999905554516238	-4.4402577249276
Q08431	MFGE8	-0.0723335110248165	3.415585573756	-1.76998087374886	0.132663180554833	0.999905554516238	-4.44135027240224
P05026	ATP1B1	-0.117750660661093	2.97863505013187	-1.5068531337746	0.18800515312328	0.999905554516238	-4.44218625848185
Q96DX7	TRIM44	0.120803909560248	3.25069260639198	1.4782359212845	0.195225671263247	0.999905554516238	-4.44282816306838
O60888-2	CUTA	-0.0795753604061998	3.36589530852202	-1.72634598293911	0.140580088190135	0.999905554516238	-4.44333562973207
O75718	CRTAP	-0.10353766332733	2.97986911669105	-1.49956588651684	0.189819329911879	0.999905554516238	-4.44402253715531
Q9Y2R5	MRPS17	0.140905805371156	3.29230165692854	1.47529292261692	0.195982983978815	0.999905554516238	-4.44408862305365
Q9NZ45	CISD1	-0.114404129450841	3.15632281561153	-1.86255077832863	0.117314738212398	0.999905554516238	-4.44421394075408
P78536-1	ADAM17	-0.116949068673804	3.28025099280034	-1.58829389267145	0.1688284315358	0.999905554516238	-4.44434301259457
Q9H4K7	GTPBP5; MTG2	0.0766140549843268	3.28511301306964	1.55708943171369	0.17594246641895	0.999905554516238	-4.44461034627066
O43678	NDUFA2	0.0881890110921857	3.3056453403783	1.53119623429918	0.182064140511402	0.999905554516238	-4.44528980524275
Q01813	PFKP	0.243731698951981	1.59540602750157	1.63074772344257	0.15959618962091	0.999905554516238	-4.45201146334224
Q9NPH2	ISYNA1	0.234296121803511	1.84172164781071	1.45734534987376	0.200661884428989	0.999905554516238	-4.45449654793055
Q6ZMG9-2	CERS6	-0.187040460842825	3.2585017329745	-1.48122812694886	0.194458540527837	0.999905554516238	-4.45498339926454
Q99081-3	TCF12	-0.111674290039294	3.19054958043565	-1.43763368727312	0.205922021904166	0.999905554516238	-4.46505832910743
Q96Q42-1	ALS2	0.0902044048466888	3.09888236180346	1.4719794940557	0.196838948169037	0.999905554516238	-4.46734087014604
Q8TEM1-1	NUP210	-0.159764898192477	3.17604144228579	-1.93548368697253	0.10649607724299	0.999905554516238	-4.46760690619626
O75131	CPNE3	-0.0490350117535494	3.31797779900891	-1.90879388095816	0.110332201892814	0.999905554516238	-4.4683660172784
Q9H788	SH2D4A	-0.0825133545772631	3.38368682563222	-1.55743126026243	0.175862990732567	0.999905554516238	-4.46885728213993
Q9Y276	BCS1L	0.0810783843041963	3.06194547644501	1.54235687781171	0.179400853974323	0.999905554516238	-4.46901794218437
Q9NQ29	LUC7L	-0.0677140891967573	3.08394167599829	-1.55735226869723	0.175881353324849	0.999905554516238	-4.46935944979008
Q8WVX9	FAR1	-0.108495022509491	3.0705131535742	-1.58087214292233	0.170494809232243	0.999905554516238	-4.4728011172508
Q5VWQ8-1	DAB2IP	0.168617871277964	3.15256418703618	1.49846334125204	0.190095259266755	0.999905554516238	-4.47491152634977
Q9NYL4	FKBP11	-0.0929788091192109	3.26490597219761	-1.65132608259074	0.155300170980645	0.999905554516238	-4.47515410874395
Q0P651-1	C4orf29; ABHD18	0.352251284593638	3.33645127998145	1.55502628611493	0.176422886181247	0.999905554516238	-4.47530235649145
Q9UHQ9	CYB5R1	-0.0589021194320113	3.30463243850048	-1.77882024535731	0.131114403595067	0.999905554516238	-4.47669909464443
Q9NW81-4	ATP5SL; DMAC2	0.10544109697925	3.30402155530351	1.45230650703382	0.201994347712265	0.999905554516238	-4.47851991416571
O14735	CDIPT	-0.237266081493816	3.13643945929145	-1.41651905027023	0.211700051407655	0.999905554516238	-4.47988949030391
Q9Y639-2	NPTN	-0.10519425779384	3.23918244931828	-1.57325906479961	0.172220680178758	0.999905554516238	-4.48016455904618
Q8IWU2	LMTK2	-0.105230354625528	3.34182233235135	-1.51873927498358	0.18508151421292	0.999905554516238	-4.48097650296931
P12259	F5	-0.096917491284003	3.5232757292975	-1.77639207469258	0.131538041921146	0.999905554516238	-4.48110321791369
Q14534	SQLE	-0.313219402808754	2.67207675316729	-1.47678075575447	0.195599777255799	0.999905554516238	-4.48132259617095
Q7Z5G4-1	GOLGA7	-0.135553515737034	3.29881876544608	-1.45810002174962	0.200463035497764	0.999905554516238	-4.48263890231321
Q9NUG6	PDRG1	-0.104464890391379	3.29655313468086	-1.43748752606461	0.205961505676549	0.999905554516238	-4.48397695109541
P00374	DHFR; DHFRP1	-0.0614667923393233	3.28897494628698	-1.65838977839776	0.153851802723565	0.999905554516238	-4.48514122501209
P34910-2	EVI2B	-0.100399338616365	3.35782177514288	-1.55957834113126	0.175364581451058	0.999905554516238	-4.48542012713307
Q9UBW8	COPS7A	-0.097605361379453	3.25938921337218	-1.51486839923399	0.186028834155639	0.999905554516238	-4.48542694306242
Q86YR5-1	GPSM1	0.283072492090116	1.88749505362115	1.6057426550278	0.16497270535081	0.999905554516238	-4.48609648908621
P12694	BCKDHA	0.0544690717850181	3.31960697784851	1.8003373826165	0.127419538439581	0.999905554516238	-4.48670248645188
P20309	CHRM3	-0.137028125442792	3.33036003593958	-1.40958919393896	0.213629236029073	0.999905554516238	-4.48757796243573
Q9ULC5-3	ACSL5	-0.101701543701677	3.28858631835002	-1.5666228801506	0.173738854909996	0.999905554516238	-4.48866615448382
Q9BW92	TARS2	0.0885541828103095	3.21733187393679	1.73600297137069	0.138788412503035	0.999905554516238	-4.4900382534337
Q9BTE6-1	AARSD1; PTGES3L-AARSD1	-0.043941706546293	3.31791776898392	-1.79343586456043	0.128593138892901	0.999905554516238	-4.4934471834104
Q5TAQ9-1	DCAF8	-0.106540473140507	3.37747189500487	-1.74861832953201	0.136482019278579	0.999905554516238	-4.49404514398757
Q05655	PRKCD	0.0440841306037536	3.32072876717238	1.83444333030293	0.121775930802572	0.999905554516238	-4.49651607349836
Q9HBK9	AS3MT	0.144934790295738	1.74800072086797	1.3886079379505	0.219570528680819	0.999905554516238	-4.4981111193672
Q14186	TFDP1	-0.0663998319199151	3.32763538622074	-1.4872851621639	0.192914404692664	0.999905554516238	-4.49831492437613
Q6P4Q7	CNNM4	-0.101731748966918	3.29329211127857	-1.44044896736894	0.205162892488005	0.999905554516238	-4.49920954821091
Q92698	RAD54L	0.0893998727143389	3.22860680901263	1.3898266275608	0.219221269816688	0.999905554516238	-4.49933286164269
P10276	RARA	-0.107000088632157	3.37627725554302	-1.41906557722677	0.2109952293376	0.999905554516238	-4.50053073738256
P60468	SEC61B	-0.130593953764542	3.206232958704	-1.45831173504672	0.2004072844453	0.999905554516238	-4.50218604881582
P13929-1	ENO3	0.0833351033160849	3.05149125403836	1.54776482382934	0.178123839712895	0.999905554516238	-4.50223304431231
Q9H857-2	NT5DC2	0.110142144948853	2.7364252406993	1.36115840117322	0.227575042288683	0.999905554516238	-4.50369355603844
Q13795	ARFRP1	-0.0907188618812942	3.2772519720876	-1.40204570206821	0.215747888307691	0.999905554516238	-4.50410379321883
Q96H35	RBM18	-0.0910384629907573	3.34116742194185	-1.37775428725605	0.222703875575537	0.999905554516238	-4.50467441668063
Q9Y6M7-7	SLC4A7	-0.181707343305349	2.98760268393326	-1.36013329310076	0.227879130005393	0.999905554516238	-4.50476743412796
Q5VUJ6	LRCH2	0.165271228130092	2.83152825787511	1.36080615819909	0.227679489317958	0.999905554516238	-4.50573198469179
Q9NWQ8	PAG1	-0.228301502441363	3.04651932303431	-1.39598842037563	0.217463276683276	0.999905554516238	-4.5065786632198
O43347	MSI1	0.170470828408882	1.5130784754668	1.39028061204847	0.219091296339366	0.999905554516238	-4.50696269681476
Q9H4I3-1	TRABD	-0.146986259004013	3.16886310417881	-1.5102108382576	0.187174819308266	0.999905554516238	-4.50977792490175
Q8IZ52	CHPF	-0.0928363317957168	3.2566923666206	-1.39860318463582	0.216721238906748	0.999905554516238	-4.51068393509607
Q7L1W4	LRRC8D	-0.122840566135287	3.28788561145954	-1.48502783176956	0.193488506412305	0.999905554516238	-4.51197272270316
Q9UQN3-1	CHMP2B	-0.0661238084965198	3.30389322918214	-1.57291887104857	0.172298194441132	0.999905554516238	-4.51245940980535
Q9NX40	OCIAD1	-0.104622605164766	3.12821156734062	-1.55170227793163	0.177199565912934	0.999905554516238	-4.5137864744226
Q96BD0	SLCO4A1	-0.187122886474004	3.34292134673413	-1.3568545551226	0.228854249567812	0.999905554516238	-4.51485895380993
O43768-4	ENSA	-0.0712800400025339	3.40029897399776	-1.6894950544162	0.14763020997292	0.999905554516238	-4.51490084950813
Q99572	P2RX7	0.624405863487169	3.57350114946042	1.40588768281973	0.214666400604539	0.999905554516238	-4.51553616957432
P11277-2	SPTB	0.074048302946796	3.40147406200862	1.41414166003945	0.212360045815767	0.999905554516238	-4.51646599796806
P18077	RPL35A	-0.0726730002509179	3.25076466663392	-1.76562902773859	0.133432384944491	0.999905554516238	-4.51950722276057
P16035	TIMP2	-0.0914194919744857	3.4084742210084	-1.48418328238243	0.193703715380525	0.999905554516238	-4.52021458778911
Q9H6E4	CCDC134	-0.0642909493984367	3.27785091393042	-1.5308915411547	0.182137379178509	0.999905554516238	-4.52166613626237
P04899-4	GNAI2	-0.122506218524529	3.35915879002443	-1.72816698353321	0.140240486998864	0.999905554516238	-4.52401247989856
Q9BQG2	NUDT12	0.0788236999407424	3.06186682539118	1.44389710686135	0.20423669869443	0.999905554516238	-4.52420956186986
P11217	PYGM	0.395456130704052	3.24425747504437	1.38930820377458	0.219369779506604	0.999905554516238	-4.52535266801149
Q04727-1	TLE4	0.164186976222834	2.36687405621648	1.31274354540641	0.242350883431276	0.999905554516238	-4.52595228183555
Q9BTT6	LRRC1	-0.0914708190699254	3.27709038383598	-1.38441574970453	0.220775896984196	0.999905554516238	-4.52613815357987
Q68CZ6	HAUS3	-0.0771734213798275	3.23043594153063	-1.50339804965586	0.188863234597994	0.999905554516238	-4.52787980730341
Q9BUE6-2	ISCA1	0.0975770936820302	3.28244935403309	1.47112380973431	0.197060573038749	0.999905554516238	-4.52938878814962
Q9UKA9-3	PTBP2	0.136325969751279	2.30196296281867	1.31688614889764	0.241053102017126	0.999905554516238	-4.52971418969483
Q86VX9	MON1A	0.0868869545695614	3.32261945800279	1.33364056312951	0.235868740998911	0.999905554516238	-4.53153166975275
Q7L5Y1-1	ENOSF1	-0.150550666242606	3.29371807544636	-1.31554071246164	0.241473900348555	0.999905554516238	-4.53202180583635
Q9UHR5-1	SAP30BP	-0.0638135001216888	3.33569474456948	-1.5599069704994	0.17528841581316	0.999905554516238	-4.53586175726124
Q99613	EIF3C	-0.0339334469239367	3.31442876689483	-2.13977730759156	0.0813217724412015	0.999905554516238	-4.53757740271241
Q15834	CCDC85B	0.128130459743984	3.25020476892869	1.27797775337168	0.253494685699462	0.999905554516238	-4.5385073639279
Q8TCC3-2	MRPL30	0.0900132221456735	3.28411390356161	1.38680612377021	0.220087849123127	0.999905554516238	-4.54156954828519
P10109	FDX1	0.133281075696695	3.24003514142062	1.28752880040916	0.250387908249905	0.999905554516238	-4.54196230695498
P10124	SRGN	-0.0781323334500536	3.42818046772268	-1.37011836961162	0.224933051428125	0.999905554516238	-4.54242466159527
Q9Y2X3	NOP58	-0.0455032002153848	3.33829434566975	-2.08683453075804	0.0871873402661277	0.999905554516238	-4.54266433420048
Q7Z4H3-1	HDDC2	-0.0706546042186172	3.14317863900474	-1.51669340721913	0.185581623837694	0.999905554516238	-4.54421338600181
Q05639	EEF1A2	0.272008857620216	1.06481953871041	1.51973569704869	0.184838406970097	0.999905554516238	-4.54425044078258
Q02223	TNFRSF17	-0.0870973080370823	3.4315610080817	-1.32508822667157	0.23850225029494	0.999905554516238	-4.54469701415406
Q8IV63	VRK3	-0.0661716697885806	3.37690360411549	-1.43194964151325	0.207462748831702	0.999905554516238	-4.54574331761424
Q12756-2	KIF1A	0.209339625809074	1.18132686944787	1.46363144040529	0.199011226831021	0.999905554516238	-4.54607931965011
Q9NTG7	SIRT3	0.131912384289497	3.36121252581132	1.26080969500721	0.259166534423371	0.999905554516238	-4.54627792765335
Q3B7T1	C10orf137; EDRF1	-0.0524605805970172	3.23816370610963	-1.56885075174888	0.173227744275798	0.999905554516238	-4.54736583327247
Q9NPF0	CD320	-0.124331668071144	3.31157866766361	-1.59664694489078	0.166971831645002	0.999905554516238	-4.54823521330614
Q16566	CAMK4	0.0956279511306334	3.07278319532042	1.28194735797926	0.252199248000729	0.999905554516238	-4.54928087661356
Q7L8W6	ATPBD4; DPH6	-0.0745236373809288	3.36318200691707	-1.46516407329421	0.198610723504565	0.999905554516238	-4.5492992928553
Q96L91	EP400	0.0455293270743789	3.35114669525363	1.90052707343675	0.111548726649448	0.999905554516238	-4.54970733839564
P00338-3	LDHA	0.0592166592954324	3.41265056333569	2.51317832689815	0.0501259856355594	0.999905554516238	-4.54996728447076
Q9H173	SIL1	0.0944807551999988	3.36893247940717	1.31725320969731	0.240938416234679	0.999905554516238	-4.55042761131751
Q9UN36-1	NDRG2	0.105963307274147	3.05274897626017	1.26381117315131	0.25816678073554	0.999905554516238	-4.55109129919403
Q8N3R9-1	MPP5	0.0843482433569487	3.17912025253649	1.33948606365291	0.234084082447936	0.999905554516238	-4.55223433883156
Q8TDB6-1	DTX3L	0.0955714556105295	3.24076892957369	1.36902275339815	0.225254584878366	0.999905554516238	-4.5533696431969
Q13596	SNX1	-0.0387700843552577	3.35041403137087	-1.86624419244344	0.116740935450888	0.999905554516238	-4.55674850716477
P0CG08	GPR89A; GPR89B	-0.116679998928176	3.27994632442155	-1.28789238141909	0.250270324343525	0.999905554516238	-4.5572279429658
Q9NUU6	FAM105A	-0.234362355575236	3.24655209577669	-1.2618374583253	0.258823809428933	0.999905554516238	-4.55817030421686
Q8IZ81	ELMOD2	-0.13621308991775	3.1944963557891	-1.50228085382027	0.189141491576681	0.999905554516238	-4.56160940480324
Q86W92-1	PPFIBP1	0.092143066587713	3.12003400749182	1.32178915444133	0.239525288736093	0.999905554516238	-4.56186028528134
Q96S94	CCNL2	-0.0676630026943057	3.29835670537559	-1.36195525967564	0.227338920922509	0.999905554516238	-4.56320554961455
Q9NTX7	RNF146	-0.0908666423692982	3.25857962944833	-1.26238481673724	0.258641449477395	0.999905554516238	-4.5647240965648
Q5SNT2-1	TMEM201	-0.169270709901175	3.19116288969882	-1.21216196441131	0.275859600774721	0.999905554516238	-4.56489082677381
O00161	SNAP23	-0.0919059054686787	3.29446453198844	-1.6870866106798	0.148102958539131	0.999905554516238	-4.56798038743215
P31937	HIBADH	0.0817836069654634	3.31077423894023	1.50474414434916	0.18852848457755	0.999905554516238	-4.56978769263532
P54687-5	BCAT1	0.178191656812534	1.94326717540244	1.33129365242673	0.236588761958945	0.999905554516238	-4.57049807362302
Q96TC7	FAM82A2; RMDN3	-0.114173828690881	3.29201845090951	-1.67144341824087	0.151210047644167	0.999905554516238	-4.5705026494741
Q96JY6-5	PDLIM2	0.145686068923488	3.31483205202308	1.17799297816423	0.28814611364096	0.999905554516238	-4.57078757335164
Q9NUL7	DDX28	0.0953611925304726	3.19682195035261	1.39044026006704	0.219045606924852	0.999905554516238	-4.57124567567844
Q9HCN4-5	GPN1	-0.0583087647451996	3.26776344165466	-1.42820211465968	0.208484468408099	0.999905554516238	-4.57524164511506
Q14153	FAM53B	-0.498648718378563	3.07832893466948	-1.30692439370934	0.244184627860907	0.999905554516238	-4.57559139974437
Q86XK3-2	SFR1	-0.112163843019749	3.28812485960728	-1.26500674268534	0.257769516612184	0.999905554516238	-4.57638285119057
Q8N3X6-1	LCORL	0.191047063322107	3.26417595027929	1.16470042091115	0.293053705479329	0.999905554516238	-4.5772991179017
P09601	HMOX1	0.108637836280347	2.25557392449063	1.19572146635359	0.281712606101719	0.999905554516238	-4.57743207541406
P35520-2	CBS; LOC102724560; CBSL	0.333972107939198	1.11817737126116	1.46184364591414	0.199479372425026	0.999905554516238	-4.57799339111372
P16284	PECAM1	-0.133490554140341	3.36420051129921	-1.39143196591978	0.218761990364451	0.999905554516238	-4.5782582213887
O60333-3	KIF1B	-0.0912898362965256	3.04518288760465	-1.31402424650769	0.241948991770179	0.999905554516238	-4.57931253043629
O43257	ZNHIT1	-0.101654381878026	3.27425166485571	-1.25121726510323	0.262384951291874	0.999905554516238	-4.58008268997489
Q86WJ1-1	CHD1L	0.057070921340601	3.26304419328309	1.6520776913381	0.155145424664134	0.999905554516238	-4.58047712998391
O95684	FGFR1OP	0.0710821790812232	3.34381397818582	1.59297125649521	0.167786359502746	0.999905554516238	-4.58233612138939
Q13115-1	DUSP4	0.108372051491383	3.30838084884143	1.16954758153445	0.2912557733813	0.999905554516238	-4.5829900168823
P78314-4	SH3BP2	0.217146759784492	3.43651808290606	1.12335108769057	0.308785822855455	0.999905554516238	-4.58342433099531
Q9UI08-2	EVL	-0.100521003348162	3.33761857418073	-1.43714694298569	0.206053537875527	0.999905554516238	-4.58366309905638
P50454	SERPINH1	0.203574358114445	1.99302247327779	1.57173073959456	0.172569178658027	0.999905554516238	-4.5837901411032
Q9UIU6	SIX4	0.113553597440902	2.55918881377045	1.15919958294545	0.295105781716601	0.999905554516238	-4.58489510521375
Q8TBF5-2	PIGX	-0.148338586594899	3.21167602980463	-1.13835599748916	0.302994782761132	0.999905554516238	-4.58505226516203
Q7L3T8	PARS2	-0.0806312769009928	3.24328544887669	-1.25624040039887	0.26069517213728	0.999905554516238	-4.58561047706497
P37840-1	SNCA	0.125657682422439	2.06938210176444	1.29871504382461	0.246793013944085	0.999905554516238	-4.58561744205209
O00425	IGF2BP3	0.221573092453908	1.34920033787626	1.46669739158336	0.198210803442102	0.999905554516238	-4.58581022826977
Q96AG3	SLC25A46	-0.136684966179001	3.02193809098992	-1.17191877102055	0.290379743341487	0.999905554516238	-4.58588422271957
Q8NG31-1	CASC5; KNL1	0.0440233985999069	3.28887992335069	1.70088410620039	0.145414774151461	0.999905554516238	-4.58666772074479
P37268	FDFT1	-0.14859548221111	2.65233522880517	-1.13326302936578	0.304949827113746	0.999905554516238	-4.58672847993699
Q92665	MRPS31	0.0859487721129604	3.27493365114287	1.56697343225397	0.173658336053728	0.999905554516238	-4.58724930141798
Q96HE9	PRR11	0.176605649059863	3.18453615125904	1.09977310242426	0.3180768431937	0.999905554516238	-4.58729123340133
Q7Z4G4	TRMT11	0.0913553222006316	3.30815476541725	1.20938356685559	0.276841150541083	0.999905554516238	-4.58753629565221
Q96AV8	E2F7	-0.131649022632448	3.24243101643103	-1.10892856314058	0.314441186235869	0.999905554516238	-4.58984369586493
Q2TB18	ASTE1	0.0820165830206142	3.29584240025894	1.23127447704898	0.269190576164827	0.999905554516238	-4.59024453480961
Q5VV17	OTUD1	0.122724932203511	3.33684754274232	1.13289964029518	0.305089735462941	0.999905554516238	-4.59075047013065
Q8NB16	MLKL	-0.0647683371848686	3.37884703416135	-1.33829090996466	0.234447959140135	0.999905554516238	-4.59195178413209
O95456	PSMG1	-0.117807893559894	3.29429854008829	-1.45145938100024	0.202219177710275	0.999905554516238	-4.59284331874907
Q7Z6M4	MTERFD2; MTERF4	0.219217784097828	3.19583124007066	1.05195564697053	0.3376476143502	0.999905554516238	-4.59310366585625
Q13542	EIF4EBP2	-0.146860666184313	3.38864341979309	-1.41904543337921	0.211000796087337	0.999905554516238	-4.59510776384678
P18084	ITGB5	-0.0970899434626403	3.28371864919602	-1.42907797631537	0.208245253356087	0.999905554516238	-4.59554832044039
P42568	MLLT3	0.0843601520168233	3.21858814930888	1.27808158117068	0.253460726361703	0.999905554516238	-4.5956714311222
Q9Y305-4	ACOT9	0.0822228170659809	3.26501558446321	1.46990133691757	0.197377606964801	0.999905554516238	-4.59696840691918
Q8IY57-5	YAF2	-0.167446526411337	3.2970142329772	-1.03853944449963	0.343316066717222	0.999905554516238	-4.59751009446328
P50452	SERPINB8	0.109985406409078	3.32056124765276	1.26126389949853	0.259015022130583	0.999905554516238	-4.59803669861343
O00505	KPNA3	-0.0833787403716371	3.07553954350907	-1.4128329890058	0.212724169660925	0.999905554516238	-4.59871037775123
P41214	EIF2D	-0.042852718025738	3.33139846622039	-1.6636451682768	0.152782824598627	0.999905554516238	-4.59941691887836
Q2TAA2	IAH1	0.105867945519267	3.40149708688023	1.13566642882057	0.304025882945022	0.999905554516238	-4.60114059089148
Q12772	SREBF2	-0.1047097959757	3.23567516785744	-1.11541840967859	0.311885536221574	0.999905554516238	-4.60229819248794
Q9UKS6	PACSIN3	0.107668442151619	3.02664403712598	1.26858369282546	0.25658424250835	0.999905554516238	-4.6032311739829
Q4ZIN3-1	C19orf6; TMEM259	-0.138276005546907	3.15291173246271	-1.34021295056285	0.233863027595721	0.999905554516238	-4.6039392138549
L0R6Q1	SLC35A4	-0.130178575536692	3.1750484283151	-1.23379277779346	0.26832260382896	0.999905554516238	-4.60537686322781
Q9NVS2-2	MRPS18A	0.147029169285966	3.19901880735446	1.0286426474427	0.347547869899349	0.999905554516238	-4.60559098165486
Q86TU7	SETD3	-0.0748878732355356	3.22198443259546	-1.37518009047226	0.223453074671024	0.999905554516238	-4.60575791814294
Q4VCS5	AMOT	0.371241175911001	1.35704932083241	1.41800330289071	0.211288976134435	0.999905554516238	-4.60578841105345
O14730	RIOK3	-0.0653175691056474	3.34394732670447	-1.48000853765083	0.194770868655529	0.999905554516238	-4.60696451616672
Q16658	FSCN1	0.333579416669833	1.26300631177667	1.68640044154975	0.148237918362209	0.999905554516238	-4.6074256341511
O00409	FOXN3	-0.205760142390787	3.29606659520555	-0.877576768506312	0.417543222368563	0.999905554516238	-4.60930292332028
Q7Z6K5-2	C15orf38-AP3S2; C15orf38; ARPIN; AP3S2	0.173709150313796	2.49800053343765	1.00591717258655	0.35742776295452	0.999905554516238	-4.60943266314956
P04350	TUBB4A	-0.210253173929334	2.96166042135472	-0.751873720323947	0.483628670909665	0.999905554516238	-4.61014042974396
O95182	NDUFA7	0.0872594555438308	3.2961586311892	1.34966143197476	0.231007007224418	0.999905554516238	-4.61018428299189
Q9UKI2	CDC42EP3	0.222906707609976	3.44021720463049	0.775096941321455	0.470882943459394	0.999905554516238	-4.61031999178909
Q9BRP8	WIBG; PYM1	-0.0577564128262146	3.3342205626274	-1.42798295177451	0.208544366377206	0.999905554516238	-4.61179755158427
P82909	MRPS36	0.0975274649876648	3.34839109643085	1.27984470497917	0.252884680697443	0.999905554516238	-4.61218134164107
A0AVK6	E2F8	-0.0898938945483107	3.37356543358637	-1.22644652743374	0.270861583056209	0.999905554516238	-4.61270563529283
P12532-2	CKMT1A; CKMT1B	0.169760743078583	1.69990390037492	1.39996869953274	0.216334659819147	0.999905554516238	-4.61282189089101
Q9NY59	SMPD3	-0.127390881448965	3.39134027223403	-1.19987918859565	0.280222175103002	0.999905554516238	-4.61340916993225
Q7Z698	SPRED2	-0.116096658671273	3.30314338585838	-1.13334416006312	0.304918598532814	0.999905554516238	-4.61477983809147
Q30134	HLA-DRB1	-0.0915996554149821	3.43621400663806	-1.41906406094259	0.210995648357763	0.999905554516238	-4.61495787661694
Q0VG06	C17orf70; FAAP100	-0.0888017684766949	3.29418442246478	-1.24047182106575	0.266032611704286	0.999905554516238	-4.61498658154177
Q9H2G9-1	BLZF1	0.0970323609419869	3.34258136197392	1.15608873566505	0.296271787853853	0.999905554516238	-4.6165809628099
P07741-1	APRT	-0.0746934539061945	3.34427564882814	-1.57345562307249	0.172175909093783	0.999905554516238	-4.61843668336746
Q9Y5V3-2	MAGED1	-0.0887818909418382	2.85871282060502	-1.10367317993945	0.316523766906817	0.999905554516238	-4.61872982332527
Q9Y450-2	HBS1L	0.127441485321736	3.41473882265284	1.22142744282026	0.272608494046643	0.999905554516238	-4.61880905573216
Q9H469	FBXL15	-0.143713405666387	3.32306943844516	-0.971262842411056	0.372933214974879	0.999905554516238	-4.61894674316848
Q9Y2H2-1	INPP5F	0.101016466228586	3.22677938761032	1.12814085758276	0.306927008723585	0.999905554516238	-4.62000306953706
Q13492-1	PICALM	-0.0530328348163036	3.35399599182207	-1.69637208201056	0.146288513169012	0.999905554516238	-4.62013484119673
Q9BTC8	MTA3	0.105859286525719	2.92623212440987	1.14901328355854	0.298938676321389	0.999905554516238	-4.62079731771595
Q5T124-1	UBXN11	0.142735700866283	3.46675944310581	1.00577900460999	0.357488527097162	0.999905554516238	-4.62086256076464
Q5T6S3	PHF19	0.157249100800122	3.3158808216706	0.636647997044728	0.550394472500855	0.999905554516238	-4.62138102478771
Q13686	ALKBH1	0.108213352405196	3.20806300074031	1.10055435767871	0.31776521694469	0.999905554516238	-4.62211229133934
Q01433-1	AMPD2	-0.0576121220332703	3.26414059051427	-1.59084529700208	0.168259227539183	0.999905554516238	-4.62292709256761
Q96DX4	RSPRY1	-0.0723944847373491	3.23087784807351	-1.20337965011839	0.2789727367137	0.999905554516238	-4.62302828059233
O43291	SPINT2	0.410449029640987	3.41383011485698	0.804307876247394	0.455195211795461	0.999905554516238	-4.62352663846099
Q12765-2	SCRN1	0.374424874638116	2.20435986531946	1.2686703204736	0.256555598012487	0.999905554516238	-4.62416405400118
P19404	NDUFV2	0.0679777567290028	3.3411525100041	1.50601171834347	0.188213778383777	0.999905554516238	-4.62474326569816
P30084	ECHS1	0.062862570622069	3.23928373153857	1.72609502351547	0.140626953945029	0.999905554516238	-4.62487461996874
Q9HA77	CARS2	0.0951509300008065	3.35288322245991	1.48867386608634	0.192562022873433	0.999905554516238	-4.62489388596088
Q9NRX4	PHPT1	0.160178411978269	3.45823576620611	1.49465714263109	0.191050757344143	0.999905554516238	-4.62524313793024
P06744	GPI	0.066692450843976	3.41029156766314	2.36431246200731	0.0606852138183432	0.999905554516238	-4.62657884181338
Q8N2G8-1	GHDC	-0.111370408753571	3.27777243026574	-1.37703216633254	0.222913808043447	0.999905554516238	-4.62701747408914
Q9C0E8-4	KIAA1715; LNPK	-0.0809033349145357	3.25624746066039	-1.52098294371927	0.184534533792295	0.999905554516238	-4.62711012810301
P0DI81-3	TRAPPC2	-0.1104335097563	3.40323087024802	-1.1012093196049	0.317504166230647	0.999905554516238	-4.62803939376057
O43491-1	EPB41L2	0.189665666574734	3.11149136673406	1.07458932656939	0.328261594627702	0.999905554516238	-4.62889098540089
Q8WUH1	CHURC1	-0.0877958014693953	3.25234889010058	-1.27338225577211	0.255001863426268	0.999905554516238	-4.62913686442001
P00568	AK1	0.102860775631961	2.94131845145912	1.45994790848109	0.199976919613998	0.999905554516238	-4.62987262600842
O75063	FAM20B	-0.0938735027851681	3.257929562531	-1.20061659952365	0.279958558422193	0.999905554516238	-4.63013553685751
Q7Z6I8-1	C5orf24	-0.0136257419880819	3.26276942769245	-0.0495765804477282	0.962243887762378	0.999905554516238	-4.63019145878548
P12109	COL6A1	-0.124020318949471	2.19539142665245	-0.971518399158229	0.372816916582276	0.999905554516238	-4.63069498111417
Q16637	SMN1; SMN2	-0.076985163683003	3.18561881171897	-1.38926292196247	0.219382755545345	0.999905554516238	-4.63163732494896
Q9Y653	GPR56; ADGRG1	0.114283978330533	3.38583639248381	0.975092779089457	0.371193344734565	0.999905554516238	-4.63167439230641
Q15257-1	PPP2R4; PTPA	-0.0859283832710879	3.33550625102764	-1.47173962855127	0.196901050263989	0.999905554516238	-4.63183765178909
Q5VUJ9-1	EFCAB2	-0.122369612879087	3.40690619256193	-0.989685328054043	0.364624048515853	0.999905554516238	-4.63218715965191
Q9BTV5	FSD1	0.281534836436643	1.80598547638061	0.860911067687994	0.425893938201307	0.999905554516238	-4.63237604904877
O95271	TNKS	-0.0923418187789828	3.16467908349259	-1.08162661227798	0.325388275941468	0.999905554516238	-4.63542814436613
O60861-3	GAS7	0.104307461220163	3.39841444180749	1.00066425339836	0.359743850594994	0.999905554516238	-4.63548279445366
O75398	DEAF1	0.130697102720304	3.25699898436378	0.72524654510929	0.498539109724131	0.999905554516238	-4.63601600667667
Q53FZ2-1	ACSM3	0.130073158356124	3.38148189209686	1.02516714850896	0.349044141669271	0.999905554516238	-4.63718323637905
P23229-1	ITGA6	-0.15683490890496	3.01051620317093	-0.698964636464323	0.513564365672618	0.999905554516238	-4.63771134829516
Q00341-1	HDLBP	-0.0410984603398194	3.31400383310483	-2.14947138962164	0.0802931185870972	0.999905554516238	-4.63814106650383
Q9P2R6	RERE	-0.116809096969872	3.23465732908468	-0.567809650440331	0.592989192407784	0.999905554516238	-4.63814445362497
Q6ZTW0-1	TPGS1	0.0809833149300931	3.20848517842472	1.10727758679016	0.31509416797584	0.999905554516238	-4.63897524177758
Q95604	HLA-C	-0.0868754281177261	3.34134076631091	-1.30082058668304	0.246121612637328	0.999905554516238	-4.63977688933838
Q3ZAQ7	VMA21	-0.143409552525021	3.20209742832004	-1.00051861891401	0.359808236703204	0.999905554516238	-4.6398920495072
Q8N6S4	ANKRD13C	-0.153120704027148	3.35057391507141	-0.771667047030846	0.472750165583125	0.999905554516238	-4.64141907947325
O75438	NDUFB1	0.209027412771913	3.17647714799257	1.31022005959208	0.243144546639843	0.999905554516238	-4.64254515342465
O43169	CYB5B	-0.157439461966653	3.10342866847304	-1.4989247895599	0.189979728108394	0.999905554516238	-4.64293600333199
P78337	PITX1	-0.0652257414902101	3.3435865720985	-1.24734444523502	0.263694444029004	0.999905554516238	-4.64304627570314
Q9Y320	TMX2	-0.148765402956179	3.17168194520739	-1.50704394559175	0.187957872855945	0.999905554516238	-4.64309600135447
Q658P3-2	STEAP3	-0.0827817457443745	3.20768121309859	-1.33046803454081	0.236842535295531	0.999905554516238	-4.64335419061402
Q969P0	IGSF8	-0.0700059541532857	3.37443480600992	-1.31130661764004	0.24280252311945	0.999905554516238	-4.64402365301265
P02786	TFRC	-0.0970479395695331	3.26681710519246	-1.90726233143244	0.110556557827421	0.999905554516238	-4.64417730133707
O94925-1	GLS	0.0724012907266173	3.28518771236758	1.31845649615089	0.240562805725885	0.999905554516238	-4.64434578284669
Q9BVM2	DPCD	-0.0766411959167426	3.33204645979356	-1.25469240378796	0.261214876057236	0.999905554516238	-4.64473138382114
O00291	HIP1	0.0645155129941323	2.93374248779908	1.23972008027697	0.266289483203361	0.999905554516238	-4.64588102141067
Q8TBC3	SHKBP1	-0.0854954372607834	3.28725391014637	-1.06924279277982	0.330458811195462	0.999905554516238	-4.64610172943328
Q05397-5	PTK2	0.201004873674731	1.79984949793867	0.832116150396323	0.44061872001815	0.999905554516238	-4.64633610203434
P53384	NUBP1	-0.0465347945063081	3.37402521431178	-1.47690136810268	0.195568743432839	0.999905554516238	-4.64633910887621
O14524-1	TMEM194A; NEMP1	-0.147320021614478	3.14624596710918	-0.913466284054437	0.399986690676951	0.999905554516238	-4.64746401860562
Q8TET4	GANC	0.107611252953518	3.37507946118076	0.909214379799416	0.402036258613152	0.999905554516238	-4.6478540347554
Q70EK8	USP53	0.0682229398840199	3.30967358990707	1.17288241944788	0.290024382457011	0.999905554516238	-4.64906263668311
Q15233	NONO	0.0389779053246227	3.26931454051678	2.14306778767839	0.0809710795344702	0.999905554516238	-4.64922667598283
Q9H8M2-5	BRD9	-0.0501809691923339	3.39817788170288	-1.59519501519833	0.167293117886171	0.999905554516238	-4.6503804301503
Q96CW1	AP2M1	-0.0497263220852109	3.35430889753529	-1.78042419033706	0.130835315161051	0.999905554516238	-4.65039544216344
Q6XUX3-1	DSTYK	-0.129097247905167	3.15013597286617	-0.509190272759795	0.630765269367753	0.999905554516238	-4.65055614872304
O43795	MYO1B	0.091297969073985	2.76946251848283	1.45330431471206	0.201729828477535	0.999905554516238	-4.65222661264651
Q709F0-1	ACAD11	-0.117224576197659	2.9135630680652	-0.901176312218067	0.405933189790617	0.999905554516238	-4.65316030656639
Q53GT1	KLHL22	0.100977837519174	3.27352868919529	0.947734654762084	0.383765416384299	0.999905554516238	-4.65321099412126
Q9H792	PEAK1	0.0844441367622813	3.26512475426694	1.13403598405667	0.304652415402757	0.999905554516238	-4.65431442579876
Q8NC60	NOA1	0.0678421003281626	3.21506227941977	1.4839259899229	0.193769324053473	0.999905554516238	-4.6543755980895
Q9C0B5	ZDHHC5	-0.0939376174881713	3.30099420555257	-1.20982087903823	0.27668645316397	0.999905554516238	-4.65545364685067
Q96ED9-1	HOOK2	-0.0710281408643666	3.20297720151437	-0.297274357272551	0.777369075120125	0.999905554516238	-4.65555451326558
Q15170-2	TCEAL1	-0.106113139607427	3.29591418510689	-1.14627375576271	0.299976824394283	0.999905554516238	-4.65634612961549
Q9UNN5-1	FAF1	0.44029600783366	1.28946734512982	1.0574296152178	0.335357289538195	0.999905554516238	-4.65691437061939
Q8IXZ2-1	ZC3H3	0.111310816791784	3.38346048168677	0.854880809122252	0.428946525660927	0.999905554516238	-4.65698603170268
Q86U70	LDB1	0.110491926449959	3.24849813540073	0.914742597327155	0.399373054365117	0.999905554516238	-4.65701427987164
Q14765	STAT4	0.0896921134051679	3.43954064371442	0.937836420441271	0.388396603218657	0.999905554516238	-4.65705099807776
Q8IXM6-1	NRM	-0.181354287980538	2.9846907997966	-0.948539005275175	0.383391008302097	0.999905554516238	-4.65798930422115
Q96SK2	TMEM209	-0.133603726644665	3.1030523642104	-1.23775720318004	0.266961244588634	0.999905554516238	-4.65844547651865
Q9NX20	MRPL16	0.1188502637603	3.38545565380435	1.36926889205467	0.225182312940836	0.999905554516238	-4.659329359419
Q8NFI3-1	ENGASE	-0.0987245456834914	3.12999099713865	-0.810321783983567	0.452013221526699	0.999905554516238	-4.65951636515076
Q13277-1	STX3	-0.124939870831939	3.20171816637981	-1.09453655194624	0.32017229300686	0.999905554516238	-4.6596134242022
Q7L2E3-2	DHX30	0.0360039339018609	3.20213486341058	1.81450132052553	0.125044532190796	0.999905554516238	-4.66053978388138
Q86XN8-3	MEX3D	0.0901153489883343	3.19911664885487	0.959953603498552	0.378109000448773	0.999905554516238	-4.66056456477537
Q8N5S9-2	CAMKK1	-0.103013744162995	2.98434445693401	-0.632125569020908	0.553132156595082	0.999905554516238	-4.66079530689061
Q8TDW0	LRRC8C	-0.147955788659865	3.25793917150855	-1.35192557513571	0.23032739392154	0.999905554516238	-4.66126635008079
O14681	EI24	-0.0967295554642902	3.15705616816264	-1.18272650506654	0.286415898367978	0.999905554516238	-4.66138325647209
P23786	CPT2	0.0851600357333894	3.28778367898399	1.70799018847291	0.14404915323227	0.999905554516238	-4.66175912103117
Q96AP0	ACD	-0.0787544929430929	3.33262549273047	-1.0431563199991	0.341356555086766	0.999905554516238	-4.66206224829857
Q14814-1	MEF2D	-0.05430945268585	3.41966678323641	-1.40819795476467	0.214018512227613	0.999905554516238	-4.66225395767212
Q9NVH1-1	DNAJC11	-0.0710182527333455	3.14605881285617	-1.22850792043382	0.270146988805772	0.999905554516238	-4.66240018229894
Q9NZM4	GLTSCR1; BICRA	0.101949344087167	3.29935230152326	0.871493914117331	0.420576594555747	0.999905554516238	-4.66266694074677
Q8TDQ7	GNPDA2	-0.0647060619869968	3.42722270735891	-1.31170952506109	0.242675808391437	0.999905554516238	-4.662999415508
Q96FF7	LOC113230; MISP3	0.129322016257272	3.45360248182906	0.869646272383216	0.421501286099983	0.999905554516238	-4.66456089489499
Q15788	NCOA1	-0.028880877061258	3.3156785762389	-0.147157528822804	0.88835190143618	0.999905554516238	-4.66524630345309
O15534-1	PER1	0.106735134247828	3.30283581954579	0.653377416591476	0.540342810262101	0.999905554516238	-4.66594763172144
O94766	B3GAT3	0.0685643024248985	3.30112707987314	1.22512578872995	0.271320306097063	0.999905554516238	-4.66628038814081
P32322-3	PYCR1	0.0565791580421863	3.20133926513954	1.61039367371358	0.163959477992578	0.999905554516238	-4.66632041124429
Q8IUC6	TICAM1	0.0935727233817735	3.43739863763116	0.898773815588525	0.407103608146008	0.999905554516238	-4.66678328614546
Q15063-1	POSTN	0.104431063594575	3.37879319394744	0.839213273483984	0.436954610176869	0.999905554516238	-4.66724676127043
P54819	AK2	-0.0575104830867959	3.33027692255737	-1.93365584389224	0.106754398243889	0.999905554516238	-4.66832531338064
Q2PPJ7-1	RALGAPA2	-0.0905683936566573	3.30210081818957	-1.08728466928209	0.323093492034391	0.999905554516238	-4.67004471276192
Q6AWC2-6	WWC2	-0.0908650579217377	3.29347667147323	-0.5847731272214	0.582311575159182	0.999905554516238	-4.67008646169084
Q86V87	FAM160B2	-0.10646908284713	3.33428083957168	-0.837424042796192	0.437876205806576	0.999905554516238	-4.67044211140449
Q9UHD1	CHORDC1	-0.0494104860075256	3.15475485597329	-1.85570219197965	0.118386287471017	0.999905554516238	-4.6706237299859
Q6ZVD8-1	PHLPP2	-0.102302041183755	3.32516242090843	-0.764197452545835	0.476834862272666	0.999905554516238	-4.67102343373645
P13797	PLS3	0.329882425689032	1.26163224785934	1.69082235439149	0.147370313523228	0.999905554516238	-4.6725986538951
Q7L273	KCTD9	-0.0847615346934158	3.10582540726484	-1.0825543118435	0.325011081849843	0.999905554516238	-4.67260335354383
Q96DF8	DGCR14; ESS2	0.0541011256827264	3.26872442835992	1.38373530446987	0.22097212155265	0.999905554516238	-4.67324020630117
Q12857-4	NFIA	-0.106774003689158	3.28756224750976	-0.729014956982426	0.496409753376052	0.999905554516238	-4.67389139650449
Q14CB8-2	ARHGAP19	0.0981269959477425	3.34146650420401	0.663504405158043	0.534316349676068	0.999905554516238	-4.6739301718893
Q6ZMZ3	SYNE3	-0.149100565709963	3.25020184355004	-1.50826786228848	0.187654874458388	0.999905554516238	-4.6743413320585
Q9NQC1-1	PHF15; JADE2	-0.0980122250900815	3.36679420697968	-0.897146046698766	0.407898086656124	0.999905554516238	-4.67448227822502
Q9UIW2	PLXNA1	-0.0685911519657927	3.24768810155659	-1.14548147488059	0.300277640347744	0.999905554516238	-4.67495390721819
O75385	ULK1	0.0812403990703991	3.27851330791245	0.570678941862918	0.591174947742994	0.999905554516238	-4.67590114213466
P36954	POLR2I	-0.0986488496613308	3.29208193295942	-1.24292906611257	0.265194505629356	0.999905554516238	-4.67592640119861
Q8N4N3-1	KLHL36	0.086596717980552	3.31687112352136	0.853176520904827	0.429812241905777	0.999905554516238	-4.67627536275235
Q5U5Q3	MEX3C	0.0731103227922323	3.26736589645118	0.451692559850619	0.669078445919708	0.999905554516238	-4.67704127133693
Q15131-1	CDK10	0.0176366369838887	3.24260702452835	0.0928154997171245	0.929400159308663	0.999905554516238	-4.67725495495506
Q96EY9	ADAT3	0.076901378860223	3.2655729648144	0.486406708370407	0.64580265003876	0.999905554516238	-4.67726253895825
Q9NQ92	COPRS	-0.0829377917885962	3.20956091950607	-0.9275518991529	0.393255161645391	0.999905554516238	-4.67755717936635
O75167-4	PHACTR2	-0.0863101277012623	3.29313594302547	-0.729102963515827	0.496360100216295	0.999905554516238	-4.67818347885818
Q7Z3E5	ARMC9	0.240096238662732	2.83529866034654	1.08450328186174	0.324219849399471	0.999905554516238	-4.67820032603381
Q99653	CHP1	-0.099925897843704	3.14200890559691	-1.33236669610296	0.236259308120469	0.999905554516238	-4.67877088162706
Q8N5J2-3	FAM63A; MINDY1	0.0408054174994092	3.34734876292174	0.246278207042494	0.814567666391911	0.999905554516238	-4.67969205389545
Q9BX66-12	SORBS1	-0.0231629251469236	3.2170417555855	-0.102650460766246	0.921948798044186	0.999905554516238	-4.68152660483699
Q9NVN3-1	RIC8B	-0.0848065816413394	3.29144322640677	-1.11437901037199	0.31229364761347	0.999905554516238	-4.6822466542968
Q969K4-1	ABTB1	0.102560146122068	3.41899922872311	1.26388727057878	0.258141478699286	0.999905554516238	-4.68254494243185
P98082	DAB2	-0.0647356619650476	3.32454753940694	-1.13931088217049	0.302629433483345	0.999905554516238	-4.68261766722419
Q86VW0	SESTD1	0.140054989549022	3.27166112819082	0.873093239380547	0.419777426440635	0.999905554516238	-4.68277832923936
Q5F1R6-3	DNAJC21	-0.0927681150843115	3.30761596371918	-1.46021616212879	0.199906443800372	0.999905554516238	-4.68281987861204
Q9UMX1	SUFU	0.0667527189681205	3.1245830077325	1.15231070459467	0.297693234280185	0.999905554516238	-4.68304268640923
Q13572-1	ITPK1	-0.0946492320054189	3.08001886847324	-0.972634283576106	0.372309442756096	0.999905554516238	-4.68380022069015
O60733	PLA2G6	-0.11137771880146	3.35757276767521	-0.873996538822006	0.419326567826317	0.999905554516238	-4.68437598072792
Q9Y6X0-1	SETBP1	0.0767008191514991	3.39135964332071	1.14253652438714	0.301398073229318	0.999905554516238	-4.6856232885307
Q9NRZ9	HELLS	-0.0542126902886911	3.2757605424627	-1.85508918775553	0.118482681253543	0.999905554516238	-4.68606738816881
Q6PID8-1	KLHDC10	0.0918361857057202	3.32807506633054	0.753797596031574	0.482563602720281	0.999905554516238	-4.6867142250377
Q8TEY7-1	USP33	0.0660015073095932	3.1669578580991	1.24968782270235	0.26290139635799	0.999905554516238	-4.68690548151963
Q9NYJ8-1	TAB2	0.082905412211266	3.15022753910007	0.53178700422065	0.616044785585184	0.999905554516238	-4.6869958493112
Q6P1M3-1	LLGL2	-0.0933251337736598	3.30663254012059	-0.837523270684342	0.437825057608563	0.999905554516238	-4.68702324090214
Q9BY89-1	KIAA1671	-0.0477188004923284	2.67392045274226	-0.273151760553664	0.794889798844109	0.999905554516238	-4.68705653922538
Q8NBI6	XXYLT1	-0.125502788519724	3.16136577827179	-1.0427643387511	0.341522560242301	0.999905554516238	-4.68710984926097
P78524-1	ST5	0.077366509433351	3.37794867082702	1.18655771415159	0.285022161470492	0.999905554516238	-4.68722051976681
Q8IY47	KBTBD2	0.0843295521941797	3.337555691316	0.908496916441333	0.402382905819943	0.999905554516238	-4.68786433462102
Q9ULJ6-1	ZMIZ1	0.124053096650609	3.35456848736967	0.966934104943209	0.374907557389112	0.999905554516238	-4.68832695761768
Q5T4F4-2	ZFYVE27	-0.134769570985357	3.05998284690762	-0.950720567290452	0.382376997752649	0.999905554516238	-4.68871501782115
Q7L590-1	MCM10	-0.0805387805915088	3.11948838714245	-0.828887275910021	0.442293274227161	0.999905554516238	-4.68922673504768
Q9NWZ8	GEMIN8	-0.105142583967119	3.28974057044473	-1.1038219776451	0.316464641001961	0.999905554516238	-4.68963306039064
Q96N64	PWWP2A	0.00804888443642807	3.33279891332397	0.0444964217718875	0.966109594168833	0.999905554516238	-4.69036517108272
Q02153	GUCY1B3	0.0933421256492728	3.28063703014785	0.790097945665706	0.462778626002448	0.999905554516238	-4.69170141938258
P17535	JUND	0.0805600539870151	3.34883334079967	0.884472335773854	0.414124826010743	0.999905554516238	-4.69177583052994
Q8N9Z2-1	CCDC71L	0.245038803857245	3.45074291319237	0.950693275990305	0.382389669828831	0.999905554516238	-4.69180749388941
O00767	SCD	-0.177410397844342	2.35906635546147	-0.898763671320745	0.407108555633787	0.999905554516238	-4.69219135216096
O60303	KIAA0556	-0.090178196308277	3.30777249906692	-0.70155064670936	0.512072458754992	0.999905554516238	-4.69266284251919
Q6UX07	DHRS13	-0.0808486529849637	3.28233119388856	-1.21302908311896	0.275553895694107	0.999905554516238	-4.69314765914356
Q9C0D3	ZYG11B	-0.0934644784233669	3.19087200018501	-1.02282727833733	0.350054486473524	0.999905554516238	-4.69323787284341
Q9NXE4-2	SMPD4	-0.0935208920038191	3.17869343762466	-1.29220065630255	0.248880802439068	0.999905554516238	-4.69356459307191
Q9NV31	IMP3	-0.0647614778199977	3.31039346150599	-1.39134679656532	0.218786334431876	0.999905554516238	-4.69373309259697
Q8N4P3	HDDC3	0.0652657964828142	3.36269959878732	1.06740349669802	0.331217536749824	0.999905554516238	-4.69402471524251
O15427	SLC16A3	-0.129557246998785	3.40606403069267	-1.2439084535012	0.264861117301632	0.999905554516238	-4.69418873140705
O95140	MFN2	-0.0753542365002392	3.20199024694425	-1.48257598850582	0.194113915411789	0.999905554516238	-4.69473997887527
Q9Y5X3	SNX5	-0.0458493802189358	3.36757467164844	-1.82328575216749	0.123593969835905	0.999905554516238	-4.69549011694662
P49407-1	ARRB1	0.107041376309691	2.25742611204864	0.841967006478941	0.435539052145284	0.999905554516238	-4.69658615190311
Q9BX70-1	BTBD2	0.070819834521975	3.35554689827759	0.985822460419138	0.366353827855008	0.999905554516238	-4.69701436785974
O75564	JRK	0.0715990004549637	3.31895343797399	0.541669571832865	0.609668765082517	0.999905554516238	-4.69707921365809
O75496	GMNN	-0.0608730701620611	3.1982211625225	-1.19119269060106	0.283343968847683	0.999905554516238	-4.69727088425268
P62341	SELT; SELENOT	0.123648414122968	3.36073904792488	0.924729095954383	0.394597019583389	0.999905554516238	-4.69829806628356
O75379-1	VAMP4	-0.0860451274405985	3.32442430828416	-0.759039067121468	0.47967029526968	0.999905554516238	-4.69862620815331
Q9BSM1	PCGF1	-0.0940518202619859	3.18798850989692	-1.00032197898341	0.359895187589837	0.999905554516238	-4.69882656194916
Q8WV92	MITD1	-0.0832809148717078	3.33915901211246	-0.929354849970108	0.392399981727244	0.999905554516238	-4.69914937946064
O95980	RECK	-0.0509684803488491	3.28023788890957	-0.318978316772459	0.761729463307086	0.999905554516238	-4.69924724581502
Q14781-1	CBX2	0.0505922753328734	1.89198027483992	0.318224753312558	0.76227041145019	0.999905554516238	-4.69924815515726
P31629	HIVEP2	0.0658032459366356	3.33274793828701	0.506956477914632	0.632231017331503	0.999905554516238	-4.69959341945761
Q9UBC3	DNMT3B	0.0861142269835298	2.79362799384598	0.715341477766619	0.504166003655891	0.999905554516238	-4.69967213474169
B2RTY4-4	MYO9A	0.0681536994640429	3.25758080402739	0.513269520012057	0.628093458218177	0.999905554516238	-4.70048747566562
Q9UM82	SPATA2	0.0354479786809345	3.3141108736861	0.202581902667366	0.846884120759408	0.999905554516238	-4.7005638020005
Q96D96-1	HVCN1	-0.111714319909169	3.34365474086043	-0.650066769975562	0.542322487527946	0.999905554516238	-4.70067299837609
P41236	PPP1R2	-0.0665568553837645	3.31913188817716	-1.43739942238456	0.205985309308995	0.999905554516238	-4.70087052130938
Q8N3Z6	ZCCHC7	0.0725947043211913	3.26567830994507	0.548683564109802	0.605166675800524	0.999905554516238	-4.70099190711935
Q15796-1	SMAD2	-0.0996215233934671	3.33872473681974	-0.777579556869045	0.469534714696165	0.999905554516238	-4.70116877709801
Q99576	TSC22D3	-0.0972046532871628	3.12159423842962	-0.761442547400682	0.478347680019932	0.999905554516238	-4.70141451147684
P19440	GGT1	-0.213171439679876	3.18667191685322	-1.33880993423909	0.234289873284413	0.999905554516238	-4.70185016470253
Q99569	PKP4	-0.0528214793029921	3.28245440064887	-0.349475339677253	0.739967291967199	0.999905554516238	-4.70195562478489
Q5T160	RARS2	0.0652260783014556	3.26541629850464	1.09231060621336	0.321066560528186	0.999905554516238	-4.70199894098413
Q14249	ENDOG	-0.0704076177282805	3.30182538168625	-1.02105010262125	0.350823468424715	0.999905554516238	-4.70207459958631
Q9BT30	ALKBH7	0.0850143764861981	3.31597627114642	0.989069311441671	0.364899454743693	0.999905554516238	-4.70281346788361
Q8TB36	GDAP1	-0.0977315116241183	2.90714749064557	-0.519787332973514	0.623837562311187	0.999905554516238	-4.70354715566447
Q96JN8-1	NEURL4	0.25735112656916	3.34113268384982	1.32264206844226	0.239260417929056	0.999905554516238	-4.70398059254123
Q9NQZ5	STARD7	-0.121633411923728	3.27366773043257	-1.22825450026039	0.270234748123158	0.999905554516238	-4.70413721084353
Q6ZN54	DEF8	0.0761937311540684	3.23708364511029	1.0273245188758	0.348114727343983	0.999905554516238	-4.70429930413659
Q9BZE9-2	ASPSCR1	-0.0483182339534672	3.32231028443311	-1.45760305436598	0.200593960806057	0.999905554516238	-4.70471985285266
Q9UHJ3-1	SFMBT1	-0.0460667387262271	3.24353586275662	-0.334726852914843	0.750459389767053	0.999905554516238	-4.70478770095837
Q9HCJ0-2	TNRC6C	0.0270820675246733	3.34406641703869	0.183545870616114	0.861072382595211	0.999905554516238	-4.70483869435741
Q6P6B7-1	ANKRD16	0.0702788691716961	3.34022403015026	1.05774566281073	0.335225450890926	0.999905554516238	-4.70516057737739
Q5SVZ6	ZMYM1	0.07450643067824	2.97248542945398	0.927695454254994	0.393187016635669	0.999905554516238	-4.70540170031624
Q86WQ0-2	NR2C2AP	-0.0826641991491419	3.27432022902619	-1.04525139067675	0.34047042160984	0.999905554516238	-4.70571272179266
P40306	PSMB10	0.0725710369530289	3.4530097107613	1.23771488852147	0.266975742664427	0.999905554516238	-4.70578545969401
P54098	POLG	0.0788127781502562	3.15594172877879	1.2409398988429	0.265872780051086	0.999905554516238	-4.70581880497047
Q9NPI8	FANCF	-0.0253080331967215	3.38999527136521	-0.161937792784649	0.877248280051537	0.999905554516238	-4.70612892905901
Q68CR1-1	SEL1L3	-0.0299068039604339	3.2269929571956	-0.135374698798309	0.897224297196022	0.999905554516238	-4.7062030780055
P49418	AMPH	-0.107064696437174	3.0335882537492	-0.896458705855449	0.408233922354914	0.999905554516238	-4.70666181691368
P12277	CKB	0.393268106577405	1.16992560459156	1.56767889593272	0.17349640617747	0.999905554516238	-4.70681342899682
Q15813-2	TBCE	-0.0617749915891481	3.2279809055685	-1.61505031864976	0.162951092839367	0.999905554516238	-4.70730337855659
Q9HCC9-1	ZFYVE28	-0.114351167395422	3.41416005027014	-0.519347579596408	0.62412419566413	0.999905554516238	-4.70736923478192
Q9BSJ6	FAM64A; PIMREG	-0.0689443077097495	2.76165928054204	-0.967043266871955	0.374857665707201	0.999905554516238	-4.70763256819935
Q86VU5	COMTD1	-0.123364463617156	3.26125599023012	-1.23672696323538	0.267314430219917	0.999905554516238	-4.70787484754074
O75448	MED24	-0.0529408217668418	3.28887701766853	-1.46998028392986	0.197357118418539	0.999905554516238	-4.70815765114625
Q96GC9	VMP1	-0.114428593692588	3.11717307606313	-1.03703725646011	0.343955636182252	0.999905554516238	-4.7082709099758
Q5T7W7	TSTD2	0.0723298251391993	3.27348481821267	0.585911946136573	0.581598935419261	0.999905554516238	-4.70896873773511
Q99766-1	ATP5S	0.0867008267905722	3.3408155579008	0.999511173883096	0.360253892702891	0.999905554516238	-4.70911019373655
Q9H0U9	TSPYL1	0.0824562044800132	3.05962492900264	0.778479285617888	0.469046785024395	0.999905554516238	-4.70940647113378
Q99538	LGMN	0.0552704429988008	3.36767176777723	1.57463662481144	0.171907143029817	0.999905554516238	-4.70956875871784
Q1RMZ1	C7orf60; BMT2	-0.0649497449217026	3.30217484841393	-0.374651501713413	0.722202481924684	0.999905554516238	-4.70959179793626
Q9H7H0-3	METTL17	0.0831294534880579	3.21354874281139	0.974947633297479	0.371259162623243	0.999905554516238	-4.70973354049867
Q9UQB8	BAIAP2	0.250254446314887	1.89190217792617	0.987380467294464	0.365655360300305	0.999905554516238	-4.71003715410931
Q8IVH8	MAP4K3	0.0873656218394034	3.33007636099216	0.983509042189451	0.367392942200562	0.999905554516238	-4.71020358810049
Q8TEH3-6	DENND1A	-0.123637124920898	3.34401931554941	-1.08755746861157	0.322983196713503	0.999905554516238	-4.71050333795237
P52292	KPNA2	0.070696204481369	3.14223465741181	1.58299737799093	0.170016017606291	0.999905554516238	-4.71115374860267
Q86XA9	HEATR5A	0.0524872120020297	3.07514687006342	0.383151833791573	0.71624744337713	0.999905554516238	-4.71133481838356
O95461-1	LARGE; LARGE1	0.0746545068868645	3.37835353411637	1.0933866808829	0.320633986809721	0.999905554516238	-4.7116994755986
Q3V6T2-1	CCDC88A	0.104483416403854	2.99095300143284	1.12498041464287	0.308152433734258	0.999905554516238	-4.71170793737196
Q6NXT6	TAPT1	-0.13792346319157	3.19526539133541	-1.28732590052546	0.250453548782681	0.999905554516238	-4.71206697044367
Q9NP81-1	SARS2	0.0793952412228094	3.23027790472782	1.36130025854222	0.227532991243197	0.999905554516238	-4.71219082714033
Q8NBU5	ATAD1	-0.139798619817127	3.11597300545803	-1.45600934861211	0.201014364581514	0.999905554516238	-4.71230861741644
Q6P3S6	FBXO42	-0.0990684203717795	3.39143648626852	-0.805766757092419	0.454421809321002	0.999905554516238	-4.71251150331817
Q8IYS1	PM20D2	-0.0395131170356076	3.39436108921232	-1.56342840824826	0.174474260055087	0.999905554516238	-4.71258832679686
Q15750-1	TAB1	-0.0723330657487473	3.24191437658228	-1.41283219121076	0.212724391816672	0.999905554516238	-4.7126032312545
Q8IX07	ZFPM1	-0.0366265946803515	3.30489066284306	-0.237461903497156	0.821057432904894	0.999905554516238	-4.71266832165666
Q14592	ZNF460	-0.103108197162967	3.32285503805157	-0.643708299635272	0.546137824266009	0.999905554516238	-4.7128382566306
Q5VYV7	SLX4IP	0.0709216133566086	3.2773772940733	0.617663182994095	0.56194500351301	0.999905554516238	-4.71295613336118
P29992	GNA11	-0.130723954874739	2.04518065609288	-0.791821867566727	0.46185376627322	0.999905554516238	-4.71342803074674
P61006	RAB8A	-0.0603932166638678	3.26898101023169	-1.40781859656144	0.214124773450737	0.999905554516238	-4.7138793450345
Q9NYR9-1	NKIRAS2	-0.0834330282057917	3.30535490318655	-0.769797581570783	0.473770120722414	0.999905554516238	-4.71440137133975
Q9Y2U8	LEMD3	-0.184810291635983	3.22833726070619	-1.45356148849277	0.201661704540879	0.999905554516238	-4.71442655229874
Q7L4I2-1	RSRC2	-0.0658344650502037	3.24151484425346	-1.10769532074084	0.314928839974816	0.999905554516238	-4.71468823926339
Q9Y2G2-5	CARD8	0.0970861708465879	3.39743842997606	1.04124181310207	0.342167989288534	0.999905554516238	-4.71494133708844
P61803	DAD1	-0.138328255841079	3.25693426983102	-1.02841179094758	0.347647094088009	0.999905554516238	-4.71504470812807
Q5D0E6-1	DALRD3	-0.0895401758683119	3.35212849786986	-0.699595204779353	0.513200311027821	0.999905554516238	-4.71583078876742
Q13614-1	MTMR2	0.0656507153932989	3.30168510447797	1.26304428118907	0.258421892953501	0.999905554516238	-4.71589835177945
P36404	ARL2	-0.0523033282963211	3.31928330276158	-1.3859142742696	0.220344327078808	0.999905554516238	-4.71614059399765
Q9UHN6-1	TMEM2	-0.0873892957853066	3.19652005599202	-0.781095213648145	0.467630215808006	0.999905554516238	-4.71625627586247
Q8WUK0	PTPMT1	0.0815963599675251	3.32069094214428	0.952840082897905	0.381393869802456	0.999905554516238	-4.71629184095323
Q6UUV7-1	CRTC3	0.0743096277570815	3.36107479725386	0.469292518970807	0.657223745198426	0.999905554516238	-4.71630358661917
Q96DT7	ZBTB10	0.0714158296780261	2.47160547658616	0.987333219502506	0.36567652603124	0.999905554516238	-4.71635551973124
O75354-1	ENTPD6	-0.078900972417313	3.34719036459181	-0.954490238606396	0.380629845725986	0.999905554516238	-4.7164080774315
Q9P2K2	TXNDC16	-0.0676744875556524	3.29895424888443	-1.08398535842618	0.324429954508127	0.999905554516238	-4.71704198533283
O43829	ZBTB14; ZFP161	-0.113271454193657	3.32124018485183	-0.876375034603445	0.418141170095094	0.999905554516238	-4.71744274934123
O14576-1	DYNC1I1	-0.0704458731769676	3.38460555360437	-0.708587077507852	0.508027918069905	0.999905554516238	-4.71819291705988
Q9BS40	LXN	-0.107516555494772	3.37473022533817	-1.22888934771546	0.270014948372315	0.999905554516238	-4.71868862503907
Q9UNL4-1	ING4	0.0829218676603278	3.3031291844114	0.763604706161012	0.477160073457135	0.999905554516238	-4.71920814831417
O95900	TRUB2	0.0665161719011306	3.24607918159057	1.27423967576664	0.254720046025965	0.999905554516238	-4.71925048750761
Q9BQ04	RBM4B	0.0741159474802539	3.28596253022661	0.851400409691761	0.430715841704904	0.999905554516238	-4.71925136340997
P04083	ANXA1	0.0728922640932669	2.54081625677228	0.881057636360584	0.415814933259033	0.999905554516238	-4.71939471318405
Q99638	RAD9A	-0.0657141348351105	3.35964471153027	-1.16251463416101	0.293867619974769	0.999905554516238	-4.71960658974052
Q96P11-2	NSUN5	-0.042937064141458	3.35344295660613	-1.51635694160276	0.185663995974313	0.999905554516238	-4.72013244145925
Q9HBU6-1	ETNK1	-0.0604142801181455	3.32245936137995	-1.22706375478737	0.270647441754188	0.999905554516238	-4.72040534140832
P11117	ACP2	-0.0649010411851054	3.30674927018908	-1.28124466701797	0.25242812784002	0.999905554516238	-4.72051786007472
Q96AY2-2	EME1	0.0846967739784246	3.21668037067239	0.720215982798979	0.501391458241882	0.999905554516238	-4.72118663486816
O75674	TOM1L1	0.0854081716315514	2.94209469695514	0.814931777285031	0.449585115659115	0.999905554516238	-4.72142617348437
Q9Y6R9	CCDC61	-0.0731871647027229	3.52822649743679	-0.684671254978111	0.521863258837387	0.999905554516238	-4.72171710660264
Q9UDV7	ZNF282	-0.0704098828061101	3.33399293934817	-0.691881582098986	0.517665696543051	0.999905554516238	-4.72210374687796
Q9Y3B6	EMC9	0.0709834458477926	3.35680239649092	0.575178341289078	0.588336674683814	0.999905554516238	-4.72262170404455
P13473-3	LAMP2	0.101535042220187	3.39552706225989	0.815494703467227	0.449289277911543	0.999905554516238	-4.72272602367561
O60337	MARCH6	-0.0462287006538382	3.32000868821346	-0.298423170958893	0.776538227572471	0.999905554516238	-4.72348110602864
P48507	GCLM	-0.0630434805880426	3.09764158120082	-1.39769862825098	0.216977673909288	0.999905554516238	-4.72378448895341
Q8TEK3	DOT1L	-0.0649474284689968	3.33692300412863	-1.26190714759788	0.258800585088226	0.999905554516238	-4.72445518263724
Q14157-5	UBAP2L	0.276877306800035	3.42122218117939	0.895401199912711	0.408751038287091	0.999905554516238	-4.72466186721672
Q9BQ24-2	ZFYVE21	-0.0853077534603089	3.2332532076236	-0.695692346707636	0.515456402079274	0.999905554516238	-4.72475189819612
Q8IWF2	FOXRED2	0.0791634479639508	3.23529247774362	0.721342818991918	0.500751563795324	0.999905554516238	-4.72481490919844
Q9Y2E5	MAN2B2	0.068011209270996	3.36876338435695	0.903621381134998	0.404744709168074	0.999905554516238	-4.72511939283934
Q9H2A2-1	ALDH8A1	-0.0682721254754073	3.31336596088785	-0.848042386752049	0.432428146800186	0.999905554516238	-4.72521335421918
Q96G04-1	FAM86A; EEF2KMT	-0.0789444990765786	3.42410924666762	-0.944408447577068	0.385316776455495	0.999905554516238	-4.72555645297294
P13591-2	NCAM1	-0.115392756958072	2.9799777546773	-0.974824546142426	0.371314985146216	0.999905554516238	-4.72557131088124
Q8TCF1-1	ZFAND1	0.0570290055320946	3.34583263050208	1.12636207628075	0.307616195390616	0.999905554516238	-4.7257336811836
Q9NPE2-2	NGRN	0.0308911207220722	3.2277166602246	0.159259040233467	0.87925844088491	0.999905554516238	-4.7258432627197
P49591	SARS	0.0317211335510252	3.29246899734695	1.71589422857795	0.142545088743866	0.999905554516238	-4.72597229052025
Q9ULC4-3	MCTS1	-0.0462964702733959	3.26761271294755	-1.41689642041225	0.211595465003941	0.999905554516238	-4.72606465102427
O76064	RNF8	0.0725528134044677	3.24014611184228	0.894834776593901	0.409028224808844	0.999905554516238	-4.72609730332372
O96018	APBA3	0.0291928449526246	3.39394538977917	0.199326875912595	0.849305817940239	0.999905554516238	-4.72639703389788
Q8WXA3	RUFY2	0.0874684059791442	3.31014645266046	1.2813633426069	0.252389459792863	0.999905554516238	-4.72685229528713
Q99607	ELF4	-0.0290675195905503	3.2427961436484	-0.212235224364908	0.839713327754625	0.999905554516238	-4.72686023756351
Q2M2Z5	PLK1S1; KIZ	-0.0622352590394999	3.25065877704903	-0.54212596320704	0.6093752322831	0.999905554516238	-4.72741333689499
Q9UI43	FTSJ2; MRM2	0.0764217021326804	3.35740765425516	1.06230471188854	0.333328462618022	0.999905554516238	-4.72776621895397
P62380	TBPL1	-0.0666232919500095	3.13710844113259	-0.935385435528681	0.389550167336624	0.999905554516238	-4.72778535364018
Q6NWY9	PRPF40B	0.0689965700465479	3.34877993292091	0.821774378426723	0.445998801308884	0.999905554516238	-4.7280992007251
Q9BU76-1	C1orf35	-0.056047418523592	3.208906380449	-1.1985702919374	0.280690629712673	0.999905554516238	-4.72812634284999
P46939-2	UTRN	0.042053981213431	3.21467274837239	1.77102707398236	0.132478922286616	0.999905554516238	-4.72821089880048
O15297	PPM1D	0.0898844884302342	3.29534533370664	0.937464194667402	0.388571618629456	0.999905554516238	-4.72864051155334
P38571	LIPA	-0.104242931600209	3.2489082523212	-1.25555628855702	0.260924732552899	0.999905554516238	-4.72893225590546
Q9Y2K2-4	SIK3	0.077602198037333	3.40594667926387	0.745435492694983	0.487204935475226	0.999905554516238	-4.7291178081698
Q5T013	HYI	0.071307457855349	3.44910153041526	1.04053226820507	0.342469124777011	0.999905554516238	-4.7293634603685
Q8WVD5-1	RNF141	-0.0221777242144936	3.3041456931941	-0.16516599830015	0.874827172516949	0.999905554516238	-4.72982029543599
Q9BSG0	PRADC1	-0.0744350056175448	3.28190219455432	-0.935302216490688	0.389589382047628	0.999905554516238	-4.73020994933016
Q96QZ7	MAGI1	0.072889609636927	3.22538310942488	1.13060060185814	0.305976166718954	0.999905554516238	-4.73074026748852
Q9NWF9-1	RNF216	-0.0130620125773326	3.33315582030896	-0.0990033567553989	0.924710997534549	0.999905554516238	-4.73094126789221
P00973-3	OAS1	-0.076441867077301	3.30399425851681	-0.859308202532196	0.426703720016542	0.999905554516238	-4.73113177149947
P60484-2	PTEN	0.0680117946949605	3.34309581190592	0.449427154617699	0.670612257958626	0.999905554516238	-4.73119305747072
Q86YD1-1	PTOV1	-0.0128592724645406	3.21193259362557	-0.0898568179343745	0.931643389755605	0.999905554516238	-4.7314489893331
Q96H79	ZC3HAV1L	0.0875121337495365	1.95543244504019	0.705251171663968	0.509942681801227	0.999905554516238	-4.73145936567026
Q6NUM9-1	RETSAT	-0.150938241606506	3.20348051988932	-1.31466328353813	0.241748685115722	0.999905554516238	-4.73147265822129
Q92771	DDX12P	-0.0353914828877619	3.24664320538158	-0.268625279098533	0.798192890212863	0.999905554516238	-4.73147890672846
Q9H3Q1	CDC42EP4	0.0173284694667091	1.97495397013777	0.0669753909935815	0.949013861007395	0.999905554516238	-4.73310717377971
Q6P4A7-1	SFXN4	-0.0935524197286606	3.05464078415472	-0.929018556631933	0.392559382185939	0.999905554516238	-4.73327427165672
O00469-2	PLOD2	0.0902617968351881	2.95868464516436	1.39598148909251	0.21746524683271	0.999905554516238	-4.73367986590366
A8MW92	PHF20L1	-0.0988724916369531	3.30668318288055	-0.857602452252275	0.42756675853734	0.999905554516238	-4.73405531656976
O75157	TSC22D2	0.0167010216414818	3.24965710815234	0.128763070662553	0.902210231391035	0.999905554516238	-4.73459646860788
Q7L7V1-1	DHX32	0.0390077211332114	3.37043833393576	0.294118789458435	0.779652951720065	0.999905554516238	-4.73477033223498
Q6P4F7	ARHGAP11A	-0.0791972439605993	3.3696485764836	-1.08685434542592	0.323267540668344	0.999905554516238	-4.73562358496188
Q9Y2Z2-6	MTO1	0.0586287553426822	3.20796329736734	1.08773922134786	0.322909730038389	0.999905554516238	-4.73578302080469
P22413	ENPP1	-0.098994170690825	3.01236187136252	-0.922841286562711	0.395496417916333	0.999905554516238	-4.73595093104131
Q7RTS1	BHLHA15	-0.0644574027590153	3.41175828240436	-0.428744112990008	0.684697653107017	0.999905554516238	-4.73654703567188
Q8TC44-1	POC1B	-0.0561437473388029	3.3682419412699	-0.461941614014615	0.662161715157143	0.999905554516238	-4.73663520848609
Q13895	BYSL	-0.062888252905123	3.28298292631518	-1.45054863251648	0.202461156321628	0.999905554516238	-4.73683225407833
Q8IUR0	TRAPPC5	-0.0617691318418888	3.4141643432264	-1.14763475104738	0.299460684537306	0.999905554516238	-4.73694948314207
P55055	NR1H2	0.0367353290983833	3.40185481311632	0.232412412881823	0.824781634093631	0.999905554516238	-4.73711539844726
P51946	CCNH	-0.0721539488548353	3.2017409422634	-1.15967429878402	0.294928199467677	0.999905554516238	-4.73738894930518
O60667	FAIM3; FCMR	-0.0730039209675407	3.38025779911043	-0.867982566964913	0.422335245570646	0.999905554516238	-4.73808377853292
Q13884	SNTB1	0.067394064112489	3.36249978796094	0.809819643689652	0.452278281378459	0.999905554516238	-4.73908507910296
Q9NP73-2	ALG13	-0.0730684909019452	3.4146036683659	-1.03669089466686	0.344103242478106	0.999905554516238	-4.73970521179587
Q9BX59	TAPBPL	-0.0813332653751815	3.3282963207113	-0.713534005742514	0.505197476415374	0.999905554516238	-4.73974288609173
Q6UWD8	C16orf54; LOC101929877; LOC102725225; LOC105369277	-0.0864013062105969	3.38558335274512	-0.755655007865338	0.481536899657337	0.999905554516238	-4.73985931644852
P78310-1	CXADR	-0.118540860697269	2.77027472502521	-0.913612832372513	0.399916194637289	0.999905554516238	-4.73990724023123
O75151	PHF2	0.0663557373351118	3.37334513685662	0.898740338569604	0.407119935488312	0.999905554516238	-4.74053607214625
Q9H6U8-3	ALG9	-0.126691676800998	3.24759625450959	-1.08621255106822	0.323527267691364	0.999905554516238	-4.74099919527807
Q8WUD1	RAB2B	-0.0944867252728857	2.96748659449153	-0.774402601725566	0.471260512741787	0.999905554516238	-4.74112213247344
Q9P2J9	PDP2	0.0621631958001982	3.30247420752036	0.483117321981439	0.647989544880721	0.999905554516238	-4.74117740686485
A1L170-2	C1orf226	0.0693127385445514	3.32510500490063	0.806388125533303	0.454092692634535	0.999905554516238	-4.74125820395774
O00483	NDUFA4	-0.131890757538195	2.93920056699602	-1.18472964957567	0.285686441968944	0.999905554516238	-4.74157629737528
Q92831	KAT2B	0.063496144668537	3.3847081231675	1.22708143375056	0.270641310415623	0.999905554516238	-4.74175307076405
Q6UXI9-6	NPNT	0.0368646624468082	3.41157963505408	0.247296840595932	0.813818893296622	0.999905554516238	-4.74209075710577
Q8WUM9	SLC20A1	-0.120283682408813	3.11172572783204	-0.725338898842017	0.498486849595776	0.999905554516238	-4.74235157453084
Q9NVT9	ARMC1	-0.0617939329652853	3.33062245607212	-1.35629063884027	0.22902234906662	0.999905554516238	-4.74343123230339
P08670	VIM	0.0778265008836755	3.40057307981065	2.26353771852918	0.0691644915627896	0.999905554516238	-4.74362184904404
Q6NUQ4	TMEM214	-0.132964712536522	3.20092389389373	-1.48271551984141	0.194078272752159	0.999905554516238	-4.74388762835059
Q9NZ63	C9orf78	-0.0751809247288905	3.24997966331508	-1.69448033279794	0.146656385440304	0.999905554516238	-4.74390292608299
Q9NQS3-1	PVRL3; NECTIN3	-0.0701350285622599	3.30879519627143	-0.616420867652901	0.562706122734823	0.999905554516238	-4.74395434944523
O15265-2	ATXN7	-0.0476135409432724	3.39481375072496	-0.422950554886859	0.688669151135758	0.999905554516238	-4.74422453595236
Q8WVD3-1	RNF138	-0.0748503421843468	2.8157715197659	-0.593202034239685	0.577049581645479	0.999905554516238	-4.74429482246861
P20020	ATP2B1	-0.105327389062057	3.21125080227509	-1.30488896191313	0.244829008955217	0.999905554516238	-4.74445464310246
P56524	HDAC4	0.0581510245392707	3.38840062891176	1.22191265542537	0.272439179093508	0.999905554516238	-4.74466822166345
Q6ZS11	RINL	0.064793569703988	3.46386607578847	0.66658553113719	0.532491566492907	0.999905554516238	-4.74479078053445
Q9Y5P8-1	PPP2R3B	-0.0288243485948028	3.11285947644396	-0.21362460867779	0.838682651984706	0.999905554516238	-4.74479892624245
Q14999-2	CUL7	-0.103382147795045	3.2058014380519	-0.733307998138907	0.493991633951715	0.999905554516238	-4.74497523379228
Q53H96	PYCRL; PYCR3	-0.0540381249313023	3.3461340742008	-1.33835900273509	0.234427213685038	0.999905554516238	-4.7454085083945
Q9UDY2	TJP2	0.0423503902966851	3.21746678756898	1.68139995381396	0.149225111943205	0.999905554516238	-4.74542254699001
O94967-4	WDR47	-0.0260822548512922	3.07366557579243	-0.196269334044149	0.851582274178498	0.999905554516238	-4.74575569810851
Q9NPJ6-1	MED4	-0.0794889434453581	3.26295484768546	-1.00540666818301	0.357652316874936	0.999905554516238	-4.74591414356682
O95571	ETHE1	0.0582957290161366	3.34945020648543	1.1853872927007	0.285447312262433	0.999905554516238	-4.74597670494009
A8K855-1	EFCAB7	0.0561793326451142	3.33160925443637	0.392092129031184	0.710008292744033	0.999905554516238	-4.74604405370286
P98175-1	RBM10	0.0856884987569004	3.36925932541414	0.893746977492413	0.409560960040818	0.999905554516238	-4.74659533179608
Q9Y277	VDAC3	-0.193667623008697	3.03846070377373	-1.65258908411019	0.155040222071483	0.999905554516238	-4.74687278491291
P40121	CAPG	-0.0622502539962107	3.36877105161828	-1.03333796606828	0.34553484359997	0.999905554516238	-4.74726928217408
Q9NUS5	AP5S1	0.0627912352607042	3.29093838402333	0.897972790029005	0.40749442160438	0.999905554516238	-4.74727206438376
Q9UNH7-1	SNX6	-0.0515859155800137	3.29421265273005	-1.64537018269126	0.156531771914637	0.999905554516238	-4.74728253702663
Q2M3G4-1	SHROOM1	-0.0617578390491074	3.32364894337134	-0.592087708669656	0.577743561798107	0.999905554516238	-4.74733614987113
Q9H0I2-1	ENKD1	0.0604956917915236	3.3597080026572	0.634184103470718	0.551884933809778	0.999905554516238	-4.74739034123608
P49356	FNTB; CHURC1-FNTB	-0.0609332310423929	3.28670768544885	-1.01652409716567	0.352788133928487	0.999905554516238	-4.74739428069557
Q6NUQ1	RINT1	0.0400252957256846	3.33845937314847	1.46714282161104	0.198094769162651	0.999905554516238	-4.74776591269137
Q6PKC3-1	TXNDC11	-0.060819866050468	3.41160790321613	-1.40958084008812	0.213631571508734	0.999905554516238	-4.7477701021427
Q99708-2	RBBP8	-0.0623497709974056	3.32625859619681	-1.01567540474018	0.353157540575229	0.999905554516238	-4.74868062295198
Q9NV66	TYW1	-0.0889712808357849	3.24162318099766	-0.879687680880773	0.416494476706977	0.999905554516238	-4.74869954466803
O94851-4	MICAL2	0.0560811935378281	3.30124858108017	0.391378705003604	0.710505251121669	0.999905554516238	-4.74870820597072
Q9UKD1	GMEB2	-0.0692424692031156	3.31445771075253	-1.12428640857669	0.308422087381445	0.999905554516238	-4.74890142585616
O75391	SPAG7	-0.0433257188944237	3.34832367232556	-1.37458072651586	0.223627849104336	0.999905554516238	-4.74892316086658
Q9BWL3	C1orf43	-0.0712708611563646	3.23035188357518	-0.954849877164936	0.380463494493994	0.999905554516238	-4.74897930082418
Q9NWS9	ZNF446	0.0980735937119828	3.3196769074599	0.885945453348809	0.413397334828055	0.999905554516238	-4.74901792292213
Q9ULQ0-1	STRIP2	0.0571306911552992	3.32531585206671	0.538321955711845	0.611824310391365	0.999905554516238	-4.74904107254768
Q96PQ7-3	KLHL5	0.0227597403836513	3.40152960858182	0.165940025251606	0.874246888628004	0.999905554516238	-4.74928640461738
Q6ZUJ8	PIK3AP1	-0.0609742107185726	3.35477619256315	-0.625187470974133	0.55734899139972	0.999905554516238	-4.74955782285499
Q9Y5X1	SNX9	0.00245796732043926	1.99083912388474	0.0161766949645592	0.987674945104732	0.999905554516238	-4.74995670364175
Q99941-1	ATF6B	0.0610746622848924	3.29324269911467	0.656628632845888	0.538403243219694	0.999905554516238	-4.7500486846871
P53778	MAPK12	0.0620929401798963	3.30698166616902	0.89829918739117	0.407335140140684	0.999905554516238	-4.75018597067295
Q9H8U3	ZFAND3	0.0829375123077009	3.27403328506304	0.828995648469683	0.442236993666519	0.999905554516238	-4.75033735282935
Q7LBR1	CHMP1B	-0.0508568206006983	3.37126716957713	-1.27000500736882	0.256114630536628	0.999905554516238	-4.75059869348857
Q9NRN7	AASDHPPT	-0.0460822448846098	3.33799549719477	-1.58968535466645	0.16851777315798	0.999905554516238	-4.75165318903282
Q92791	LEPREL4; P3H4	0.0658943212174509	2.0055602086316	0.729023860951133	0.496404729613386	0.999905554516238	-4.75165868154184
O43505	B3GNT1; B4GAT1	-0.056127146962886	2.7118534508394	-0.448646306530737	0.671141351920277	0.999905554516238	-4.7517036226516
Q969T7	NT5C3B; NT5C3L	0.0614628847929172	3.248154613327	0.647231184586217	0.54402181940463	0.999905554516238	-4.75180273000013
Q8NHZ8	CDC26	-0.182635450241875	3.15337079988432	-0.928968263096918	0.392583225310262	0.999905554516238	-4.75191514492044
O75132	ZBED4	0.0412599314258598	3.21199073736733	0.30987567693739	0.768273858374681	0.999905554516238	-4.75199719269626
Q9NX05-1	FAM120C	-0.0912271292866469	3.13545926643667	-0.505494021777215	0.633191654663079	0.999905554516238	-4.75285004735072
P28799	GRN	0.0572212364161565	3.24897991632512	0.444396418936846	0.674024736095013	0.999905554516238	-4.7537382589742
Q9UBM7	DHCR7	-0.0961093164812057	3.21210407631968	-1.07617561743972	0.327612056655976	0.999905554516238	-4.75433909285145
O43303	CCP110	-0.0590507364964331	3.26625558796755	-1.17842268153057	0.287988670980702	0.999905554516238	-4.75455756269096
Q15262-4	PTPRK	0.0616055689398088	3.3085581847233	0.785686660130198	0.465151315890262	0.999905554516238	-4.75485411097524
Q8N573-1	OXR1	0.00223766801030004	3.32831629602764	0.0181273034678805	0.986188955315259	0.999905554516238	-4.75519759612995
P14927	UQCRB	0.105975377526369	3.24675988778119	1.13084509755441	0.305881792465762	0.999905554516238	-4.75522551290832
P23142	FBLN1	-0.0457540845637209	3.28909814290255	-0.412400241191702	0.695930057927806	0.999905554516238	-4.75524421133348
Q8IYU8	EFHA1; MICU2	-0.086276222236563	3.2152204164021	-0.844615361397098	0.434180903566541	0.999905554516238	-4.75532216924376
Q7Z7C8-2	TAF8	-0.0671381147577361	3.25733942983112	-0.749023789923636	0.485209448208199	0.999905554516238	-4.75572069297791
P30307-1	CDC25C	0.0596068354430873	3.23384185789392	0.698803656310247	0.513657334505051	0.999905554516238	-4.75573881074907
Q9UBU6	FAM8A1	-0.113518962672076	3.16397575239977	-0.796043173197528	0.459594752904898	0.999905554516238	-4.75607387250964
Q969U7	PSMG2	-0.0591875879981314	3.33688013209664	-1.32070550987779	0.239862198335633	0.999905554516238	-4.75633223908047
Q7Z5W3	BCDIN3D	-0.0698463609624279	3.28104857176059	-0.729682536327194	0.49603319194075	0.999905554516238	-4.75642766980378
Q9BU23-1	LMF2	-0.0702417514172049	3.30276332871731	-1.1851352478394	0.285538939146782	0.999905554516238	-4.75652492512841
Q9UBQ5	EIF3K	-0.049856511397215	3.32599324552948	-1.50605104425782	0.188204022780355	0.999905554516238	-4.75778469930038
Q9BR77-1	CCDC77	-0.0786719527001723	3.25077088265511	-0.791121170099351	0.462229518976982	0.999905554516238	-4.75780288525993
Q9H2X6-1	HIPK2	0.0470843855988992	3.33172577428659	0.441920885771426	0.675707165410394	0.999905554516238	-4.75840429806239
P54259	ATN1	0.0510781759412313	3.43929392478967	0.40148227067735	0.703482302877836	0.999905554516238	-4.75855522756629
Q9NXF1	TEX10	-0.0554551184640239	3.31431777083351	-1.47047513575651	0.197228738939165	0.999905554516238	-4.75884743334828
Q969X5	ERGIC1	-0.0685285475336655	3.35824354572498	-1.45354359793333	0.201666442950901	0.999905554516238	-4.75886974448593
P56282	POLE2	0.0560602423486302	3.03024807430853	0.386716820131245	0.713756564299959	0.999905554516238	-4.75934784089843
O60941-1	DTNB	-0.0586911793450121	3.31953493744676	-0.465005733219155	0.660101053004579	0.999905554516238	-4.75956952132808
Q9ULF5	SLC39A10	-0.0948879877008134	3.18853518499847	-1.06898570524298	0.330564774346933	0.999905554516238	-4.75998483434829
Q9H6A9-1	PCNXL3; PCNX3	0.018878972343462	3.35013530705377	0.143422779891586	0.891162246182969	0.999905554516238	-4.76013264503895
Q9UGM6-1	WARS2	0.0754438791357653	3.1776840769043	0.973718318958161	0.371816984634316	0.999905554516238	-4.76064894667844
Q8NEZ3-1	WDR19	0.0879614371014698	3.28125576821168	1.06862114620847	0.330715082610197	0.999905554516238	-4.76081285357756
Q99611	SEPHS2	0.0795211385366466	3.26709916706626	0.894540407531321	0.409172335367141	0.999905554516238	-4.76113545845012
Q8NCP5	ZBTB44	-0.00298533198001451	3.42217913679179	-0.022712517867534	0.982696157971799	0.999905554516238	-4.7614038034426
Q96NT3-3	GUCD1	-0.0360790389370517	3.30444365580048	-0.322716944469768	0.759047919123434	0.999905554516238	-4.76237958386226
Q9Y5J6	FXC1; TIMM10B	-0.0676906973812034	3.36020876385333	-0.961972712851016	0.377180744783306	0.999905554516238	-4.76271553074443
Q12766-1	HMGXB3	0.0254600166617444	3.34254403168382	0.19754822848607	0.85062989157244	0.999905554516238	-4.7627865094496
Q8WZ42-12	TTN	0.0476031331961569	3.43911175501822	0.436118921501972	0.679658554726103	0.999905554516238	-4.7630961455943
Q12770	SCAP	-0.104916050039512	3.18766819700506	-0.615078800960487	0.563529081362526	0.999905554516238	-4.76337264921073
Q9Y242	TCF19	-0.0632073035587718	3.36886120379606	-0.630608587265485	0.554052411257831	0.999905554516238	-4.76350078919772
Q9H330	TMEM245	-0.0662109901948539	3.18150417585071	-0.637798665522408	0.549699290821089	0.999905554516238	-4.76400498930946
Q96M11	HYLS1	0.0573639850249372	3.36159849493894	0.933389940730323	0.390491347888352	0.999905554516238	-4.76401735921992
Q8TDP1	RNASEH2C	-0.054361650903571	3.28502469691777	-1.08262163438456	0.324983723476557	0.999905554516238	-4.76420067124481
Q9NXW2-2	DNAJB12	-0.094802912554105	3.17800543894465	-1.10256614396198	0.316963950972187	0.999905554516238	-4.76434882716039
P57723-1	PCBP4	0.0133210086707559	3.22681658725952	0.115525535112522	0.912207698722062	0.999905554516238	-4.76452704185625
O75844	ZMPSTE24	-0.124337571174917	3.1817615009217	-1.56963227173804	0.173048794842691	0.999905554516238	-4.76542324834903
Q5VTE6-1	ANGEL2	-0.0814212330504367	3.28856919657261	-1.26110493594338	0.259068039722027	0.999905554516238	-4.76567769883327
Q9H4B0	OSGEPL1	0.0617503775992932	3.19331336918427	0.858904947880948	0.426907631095845	0.999905554516238	-4.76581629426691
Q92560	BAP1	-0.0618783718187968	3.26524445609761	-0.982752040566631	0.367733479952542	0.999905554516238	-4.76592655311398
Q8TDJ6-3	DMXL2	0.0707832704173443	3.14617852046412	0.716649206903707	0.50342061950379	0.999905554516238	-4.76618667765215
Q15149-4	PLEC	-0.0612678580960706	3.35224127933704	-0.51914637104023	0.624255369011347	0.999905554516238	-4.76633125773897
Q9Y2U9-1	KLHDC2	0.0218322095654578	3.34486056447075	0.18102961805955	0.862952342343501	0.999905554516238	-4.76642862456169
Q8IW50	FAM219A	-0.060008727729767	3.23411935425209	-0.651722449729175	0.541331849038527	0.999905554516238	-4.76672142049275
P02774-3	GC	0.0865850904253945	3.0916664409129	0.816158073675633	0.448940837165127	0.999905554516238	-4.76675870397843
Q9Y535	POLR3H	0.198964850752783	3.36355389447676	0.938856044324645	0.387917509004723	0.999905554516238	-4.76678215045571
A8MPS7-1	YDJC	0.0503961148539614	3.2576755406465	0.403790732690416	0.701882268624376	0.999905554516238	-4.76727770881709
Q8TBF2-3	FAM213B	-0.0567257052144602	3.3102676821896	-0.968305557150762	0.374281131360012	0.999905554516238	-4.7677318475262
Q69YI7-1	NAIF1	0.0308821316114559	3.34183114153189	0.271689736513614	0.795956157524019	0.999905554516238	-4.76791399475484
P32970	CD70	-0.0570627895701483	3.34271178975878	-0.605120170316216	0.569659208131351	0.999905554516238	-4.76796104349902
Q9NP50-1	FAM60A; SINHCAF	-0.095107072187974	3.22900576358544	-0.996719848465334	0.361491016807247	0.999905554516238	-4.76832410415276
P68400	CSNK2A1	-0.0360382682707231	3.28449229131819	-1.66326258699107	0.152860397172782	0.999905554516238	-4.76843723336705
O75381-1	PEX14	-0.117726047714198	3.19389376937875	-1.40288767066716	0.215510447243076	0.999905554516238	-4.76853047082238
P00352	ALDH1A1	-0.105301382308339	3.47184706150248	-0.804978977836366	0.454839318577738	0.999905554516238	-4.76854487539216
Q9NZJ4-1	SACS	0.0574605235409976	2.98916457341876	1.0941455362263	0.320329229593588	0.999905554516238	-4.76903902551456
Q9P206-2	KIAA1522	-0.0601421502355762	3.22620019876845	-0.471970448064854	0.655429647496291	0.999905554516238	-4.7690410159372
Q16352	INA	0.0673137503369758	2.4098186262724	0.703058102707865	0.511204140416147	0.999905554516238	-4.7691782285834
Q15392	DHCR24	-0.0839780174737931	2.82972075117109	-0.88244819931174	0.415126036509046	0.999905554516238	-4.76932996738708
Q96F46	IL17RA	-0.0133685196009154	3.26891418328233	-0.103093233881744	0.921613538311714	0.999905554516238	-4.76954762767157
Q9BRJ7-1	NUDT16L1	-0.0720497115348245	3.38478562219466	-1.06566481956384	0.331936097753825	0.999905554516238	-4.76992858707431
Q9H8T0-2	AKTIP	0.0519566740342888	3.38341671479908	0.562832578006487	0.596144024203476	0.999905554516238	-4.77018900250733
Q8TAV0-3	FAM76A	-0.030837104905058	3.19891156991335	-0.249367797543838	0.812297264936006	0.999905554516238	-4.77055489722405
O15270	SPTLC2	-0.0708073732356004	3.13772258607649	-1.06695865349885	0.331401257512202	0.999905554516238	-4.77067130375401
P47224	RABIF	-0.0273721186078879	3.39396448598597	-0.202629894664075	0.846848429322516	0.999905554516238	-4.77111368322088
Q7L775	EPM2AIP1	0.0147065813620843	3.31821813535516	0.124261277563682	0.905607992605677	0.999905554516238	-4.77130435748144
Q9BQI3-1	EIF2AK1	0.0289709051603974	3.14624371091329	0.259831217815966	0.804623521893391	0.999905554516238	-4.7715385515037
Q5R372-5	RABGAP1L	0.112639325639985	3.37510519222687	1.01183860067865	0.354831526811787	0.999905554516238	-4.77181608061697
P14921-1	ETS1	-0.0702910302953093	3.55696427453955	-1.00497204702635	0.357843582976595	0.999905554516238	-4.77198263625166
Q96QE5	TEFM	-0.0535124638856127	3.28156080291652	-0.561101863567968	0.597243402014249	0.999905554516238	-4.77209626718977
Q96DG6	CMBL	-0.0492452205886306	3.32719741181171	-1.41325944875572	0.212605447756475	0.999905554516238	-4.77234176841215
Q93086-4	P2RX5	-0.0641818348413697	3.38407529883869	-0.600112288525671	0.572757422579859	0.999905554516238	-4.77254557495428
P17676	CEBPB	0.0307650937351019	3.26852966608127	0.229089996008955	0.827234855523995	0.999905554516238	-4.77267658699956
Q9NXV2	KCTD5	0.0281854522400574	3.16171011074093	0.226978512612143	0.828795083932361	0.999905554516238	-4.77289813642817
Q13309-1	SKP2	-0.0658621713104817	3.07694786202354	-0.668878775263181	0.531136063810632	0.999905554516238	-4.77298680755571
Q7L099-3	RUFY3	0.28179130067561	3.39157356647032	1.0718448203482	0.329387942377087	0.999905554516238	-4.77332199283616
Q9C073	FAM117A	0.0607848436672855	3.37010405458525	0.742152920850901	0.489035437199511	0.999905554516238	-4.77442227391092
Q16698	DECR1	0.0568614510055059	3.33971305431674	1.43370735907965	0.206985147202108	0.999905554516238	-4.77450314007716
Q5TB80	KIAA1009; CEP162	0.0662955385711918	3.30543299096846	0.741152133025992	0.48959447461552	0.999905554516238	-4.77475027903566
Q8IYL2	TRMT44	-0.0823966610129281	3.29649572793922	-0.712270448692263	0.50591940880108	0.999905554516238	-4.7747565166158
P19634-1	SLC9A1	-0.142365638884184	3.27692851989799	-0.981430847019699	0.368328430317049	0.999905554516238	-4.77480936473393
Q02833-1	RASSF7	0.0580638604412378	3.30763138414751	0.617109200173029	0.562284327847475	0.999905554516238	-4.77488507281197
O95786	DDX58	0.0489386622359229	3.2780338267519	0.400747328121798	0.703992062804174	0.999905554516238	-4.77503937406954
Q9BU64-1	CENPO	-0.0222999921699092	3.25356850311041	-0.177002275429899	0.865963372832531	0.999905554516238	-4.77522892707683
P41208	CETN2	-0.0532437986602591	3.18620300952156	-1.1869269845283	0.284888140644781	0.999905554516238	-4.77560312984011
Q96BP2	CHCHD1	-0.0725901220144821	3.28855951714677	-0.736098924268569	0.492423996372063	0.999905554516238	-4.77560964538973
Q8WVC6-1	DCAKD	-0.0826706539606714	3.08627333189055	-1.03040044219349	0.346793119529985	0.999905554516238	-4.77574689697269
Q05BQ5	MBTD1	-0.0314392513001444	3.31344701132837	-0.245510054431695	0.815132462651694	0.999905554516238	-4.77610745899298
Q9Y4K4	MAP4K5	0.0571173148675749	3.14243239781554	0.448307482055607	0.671371001532943	0.999905554516238	-4.77624181000475
Q2LD37-1	KIAA1109	-0.0474892870972594	3.29808498931907	-0.478795060315423	0.650869135933363	0.999905554516238	-4.77716688882077
O00142-6	TK2	0.055997695352753	3.34929274121712	0.497002431728309	0.63878533222676	0.999905554516238	-4.7772070176722
Q6EEV4-1	POLR2M	0.071954021734489	3.28788032772493	0.674787528169898	0.527653971978039	0.999905554516238	-4.77732041282174
O94811	TPPP	-0.0597107681806309	3.37809271150582	-0.809844428860969	0.452265195600886	0.999905554516238	-4.77748846448694
O43251-8	RBFOX2	0.0943639376800608	2.93519519082537	0.898543964542374	0.407215720821342	0.999905554516238	-4.77754993456029
Q9NQ89	C12orf4	-0.0605326415635829	3.38066517426041	-0.694010838240236	0.516430474591827	0.999905554516238	-4.77771544485412
O95081	AGFG2	0.0452122013503335	3.3751771751001	0.369345473618253	0.725930854040935	0.999905554516238	-4.7785225724245
O95059	RPP14	-0.0672469952139512	3.25465129723304	-0.894253074227055	0.409313039301692	0.999905554516238	-4.77861125245136
E9PAV3	NACA	-0.0407819078335905	3.32417431102332	-1.70034292909569	0.145519298595173	0.999905554516238	-4.77884503698752
O43709-3	WBSCR22; BUD23	-0.0674080511825047	3.35376037113256	-1.07815365535571	0.326803624722873	0.999905554516238	-4.77889479537884
O43819	SCO2	-0.087310855319412	3.10006853437342	-1.16562293623602	0.292710779763737	0.999905554516238	-4.7789837798974
Q96PN7	TRERF1	0.0566320214468087	3.35566782739507	1.06887916263	0.330608696108849	0.999905554516238	-4.77906147200255
Q9P2N7-5	KLHL13	0.0146520774188143	3.01300439086847	0.119043492410863	0.909548960754613	0.999905554516238	-4.77922166129467
P48551-1	IFNAR2	-0.0516355461135294	3.35283657929715	-0.504226221946041	0.634025079658727	0.999905554516238	-4.77928330210475
P14373	TRIM27	-0.0483424487073985	3.24826923077956	-1.29571510779427	0.247752481341493	0.999905554516238	-4.77937040686903
Q9NZJ7	MTCH1	0.0643218424172536	3.11158087624475	0.669001853634446	0.531063378278946	0.999905554516238	-4.77968148026023
Q9Y5S9	RBM8A; LOC101060541	-0.0758430903740527	3.30541342681069	-1.47177496728008	0.196891899767468	0.999905554516238	-4.77970001822458
Q643R3	LPCAT4	-0.0831717665535491	3.281982745358	-0.686461456497677	0.52081895784452	0.999905554516238	-4.77984962631414
Q6NW34	C3orf17; NEPRO	-0.0785157202102712	3.30225951198837	-1.13887918778314	0.302794557434724	0.999905554516238	-4.78041932981264
Q6ZU35	KIAA1211	0.0302458886321522	2.9560463779301	0.238965995103673	0.81994911253344	0.999905554516238	-4.78044216299943
P57721-1	PCBP3	0.0555850415405506	3.43027461964094	0.39310636732122	0.709302068354338	0.999905554516238	-4.78064035094453
Q9Y4X4-1	KLF12	0.0397729668020552	3.33529844674622	0.344868682595848	0.743237864832187	0.999905554516238	-4.78105174815592
Q9HAW0	BRF2	0.0778327001838691	3.35883513875501	0.416045129908329	0.693417433183947	0.999905554516238	-4.78107752214413
P14854	COX6B1	-0.0638845167724197	3.34868006466741	-1.27639936055559	0.254011441544359	0.999905554516238	-4.78135078532586
O75051-1	PLXNA2	-0.0274627220954568	3.32771364385529	-0.19764190449286	0.850560142896858	0.999905554516238	-4.78142017831092
P01591	IGJ; JCHAIN	-0.0591416869362436	3.45078344267322	-1.54429840458114	0.178941379237166	0.999905554516238	-4.78155123440034
Q9NQ66-1	PLCB1	0.00373140987245475	3.22519284054486	0.0282308238877316	0.978493155455811	0.999905554516238	-4.78158284999083
O94868	FCHSD2	-0.0675354156375081	3.39190291641758	-1.53880500699393	0.180244361422591	0.999905554516238	-4.78160495195689
Q9NPA0	EMC7	-0.08444209083457	3.11990467909422	-1.13163016151964	0.3055789302565	0.999905554516238	-4.78199703218028
Q96JC9	EAF1	0.150272175885919	3.4072833742328	1.02987154566839	0.347020071330148	0.999905554516238	-4.78251381592908
Q9H8M7-1	FAM188A; MINDY3	-0.0644922270916281	3.25128604794696	-0.580918209906035	0.584727794938415	0.999905554516238	-4.7827345204113
Q96GW9	MARS2	0.091814397216654	3.2675385921689	1.31842804100263	0.240571681945479	0.999905554516238	-4.78298670708823
A8MT69-1	STRA13; CENPX	0.054124752301399	3.38519658007558	0.6609660944014	0.535822728149868	0.999905554516238	-4.78307408180965
O00763	ACACB	0.0759175188089672	3.42316506751676	1.08259880993163	0.324992998605614	0.999905554516238	-4.78321464223408
P16220-1	CREB1	0.0515386288685431	3.34339762089772	1.15156929468663	0.297972874306356	0.999905554516238	-4.78322862959468
O14656	TOR1A	-0.0474114453549483	3.35001760515829	-1.38689056516635	0.220063579838635	0.999905554516238	-4.78324333103861
O00327-2	ARNTL	-0.0553293345302681	3.3724685237081	-0.588209310263499	0.580162924565294	0.999905554516238	-4.78397560103949
Q2T9J0	TYSND1	0.0144847812333736	3.26151197060529	0.126020886063148	0.904279643315165	0.999905554516238	-4.78401797893955
O95696	BRD1	0.0633955768542118	3.31171731233345	1.2560177354336	0.260769869685863	0.999905554516238	-4.7841254147735
Q9Y2U5	MAP3K2	-0.0491058780057241	3.40113356945241	-0.421546512528889	0.689633313024781	0.999905554516238	-4.78440353541183
Q9P289	MST4; STK26	-0.0580688767825358	3.34575192130579	-1.3261818601373	0.238163997288343	0.999905554516238	-4.78472606101979
P48380	RFX3	-0.0774477020831634	3.09886331552249	-0.219047725570366	0.834663125357818	0.999905554516238	-4.78485142504313
P30305-1	CDC25B	-0.0124356311615073	3.29675051420265	-0.105500743537274	0.919790934712667	0.999905554516238	-4.78486531048475
Q9H211	CDT1	-0.0538274452262989	3.20061140494616	-0.599533977801729	0.57311587300124	0.999905554516238	-4.7848737330756
Q9Y5S1	TRPV2	-0.090444499853404	3.28384753402651	-0.917215976378056	0.398185974493916	0.999905554516238	-4.78508502606411
Q6NVV7	CDPF1	0.0283414172528573	3.3015556969246	0.239146279277788	0.819816297788594	0.999905554516238	-4.78512670637122
Q8NCH0	CHST14	0.0546070412977772	3.2775590542401	0.678347536039019	0.525563328469921	0.999905554516238	-4.78513117684029
Q9NNX1	TUFT1	-0.0595745835370937	3.28383485223362	-0.563760774960148	0.595554912049894	0.999905554516238	-4.78564165736482
Q8NHM5-1	KDM2B	0.0945355744302066	3.2553927710007	0.980148914291068	0.368906443183854	0.999905554516238	-4.7856469360071
O95405-1	ZFYVE9	-0.0281532796462067	3.1208628891287	-0.198261870764462	0.850098570761673	0.999905554516238	-4.78619768548369
Q96CU9	FOXRED1	0.0593975274377814	3.29519028295442	1.32492653793599	0.238552296674633	0.999905554516238	-4.78629620035432
Q68D10-1	SPTY2D1	-0.0450020388374879	3.41724302879139	-0.29288643633126	0.780545553846985	0.999905554516238	-4.78630649204534
P49454	CENPF	0.0248020737490089	3.2808880309284	2.01072467824169	0.0963999063357366	0.999905554516238	-4.78658078095878
O15417-1	TNRC18	-0.0620337805118177	3.32282642429428	-0.755689964749869	0.481517591683707	0.999905554516238	-4.78682831780442
Q8WXE1	ATRIP	-0.0547634343898411	3.30750791240923	-1.2998377624461	0.246434802595824	0.999905554516238	-4.78709331526222
Q9NV06	DCAF13	-0.0507154797648208	3.26023269944014	-1.19662969845369	0.281386436032211	0.999905554516238	-4.78735207652251
Q9GZT5	WNT10A	-0.0557208249056745	3.48888424707611	-0.503131853208319	0.63474497991036	0.999905554516238	-4.78744217753406
Q8TAA5	GRPEL2	0.0338817134378444	3.07307661372095	0.304037610408666	0.772482538444274	0.999905554516238	-4.787603353772
Q96HY7	DHTKD1	0.0630856473754441	3.10736337844188	1.14625838584879	0.299982657620328	0.999905554516238	-4.78781982768104
Q9H160	ING2	-0.0519466451403451	3.26295825905626	-0.548536517817525	0.605260862062776	0.999905554516238	-4.78783425463386
O95835	LATS1	-0.0546836894903697	3.09924859225419	-0.536380690804862	0.613076304549042	0.999905554516238	-4.78799564918719
Q9BQ90	KLHDC3	-0.0633763955891365	3.28676387679809	-0.981773164794301	0.368174205730135	0.999905554516238	-4.78803736050642
Q9NUV7	SPTLC3	0.0692916268051481	3.39790872702057	0.482053737599417	0.648697498015429	0.999905554516238	-4.78803857525418
Q9Y388	RBMX2	-0.0679561531011532	3.28129922003434	-0.644352561955123	0.545750455512305	0.999905554516238	-4.7884223222823
Q53HC9	TSSC1; EIPR1	0.0551169455040864	3.35912899661396	1.1975949478387	0.281040153343112	0.999905554516238	-4.78876279513436
Q96LJ7	DHRS1	0.087429105587164	3.40738815856755	1.12804394046564	0.306964524998569	0.999905554516238	-4.78885081445305
Q8N6Q8	METTL25	-0.190362210393376	3.36963714166503	-0.994276748340014	0.362576637708678	0.999905554516238	-4.78885911015653
Q969V6	MKL1	0.0453402120411484	3.36440460684597	0.466422904302229	0.659149115955667	0.999905554516238	-4.78887390423017
O00587	MFNG	-0.0836733041726144	3.22670205677825	-0.432034724590211	0.682446952256408	0.999905554516238	-4.78961206139523
Q9HBH1	PDF	0.0696445881625823	3.31022114018559	0.832895272782436	0.440215359523912	0.999905554516238	-4.78964326948492
P05023	ATP1A1	-0.107330545340342	3.21582007698525	-1.89135437181988	0.11291453722212	0.999905554516238	-4.78984792988155
P01106-2	MYC	-0.0794547314262286	3.31254471004786	-0.656442836799463	0.538513960715529	0.999905554516238	-4.79089169267413
Q96IR7	HPDL	0.0513350161270078	3.12984270125624	0.583044110610094	0.583394554982954	0.999905554516238	-4.79112009799468
Q96RR1-1	C10orf2; TWNK	0.0607247915420023	3.28570394458008	0.732674807067886	0.494347773520496	0.999905554516238	-4.79130309740775
Q7Z7L7	ZER1	0.0554588934451517	3.26812987387129	0.760920582558063	0.478634692980687	0.999905554516238	-4.79156027373486
Q9UP95	SLC12A4	-0.0564577482792734	3.28745694438549	-0.78958453987826	0.463054319797948	0.999905554516238	-4.79197029533686
Q9H4P4	RNF41	-0.0584313547886548	3.27713565303073	-0.607175247807402	0.568390806758583	0.999905554516238	-4.79197575658208
Q01459	CTBS	0.0538611540751918	3.33536052659513	0.460602305390284	0.663063464873137	0.999905554516238	-4.79197732873722
Q9H040-1	SPRTN	0.0236817838977895	3.20690998340254	0.220996022411109	0.833220441359614	0.999905554516238	-4.79211155863802
Q9HB96	FANCE	-0.0508651349086917	3.25229547143548	-0.459821523777609	0.663589454112624	0.999905554516238	-4.7928316161682
Q58FF7	HSP90AB3P	-0.00836272031308641	3.27289590074192	-0.0693936531190405	0.94717635584305	0.999905554516238	-4.79287958977285
Q07617	SPAG1	-0.077161423187602	3.22081222734643	-0.78716381734045	0.464355823873295	0.999905554516238	-4.79320055733613
Q96EK7	FAM120B	-0.0616860721325492	3.14168819198486	-1.09428860735059	0.320271799552699	0.999905554516238	-4.79336469559269
Q96C34-1	RUNDC1	-0.0723103744849158	3.29273915681102	-1.02115964172797	0.350776030862051	0.999905554516238	-4.79341759770372
O75319-1	DUSP11	0.0612531239305091	3.34777662795316	1.01340656861591	0.354146643681911	0.999905554516238	-4.79360136371328
Q9BVN2	RUSC1	-0.0423067605921601	3.33326602108015	-0.416339817903664	0.69321447900526	0.999905554516238	-4.79437211579186
Q7Z628	NET1	-0.0905080618179331	2.97723419175662	-0.390905352417433	0.710835068335155	0.999905554516238	-4.79451600304678
Q8IX15-3	HOMEZ	0.0444649098434513	3.22031173355488	0.500557688020708	0.636440092295936	0.999905554516238	-4.79482356588224
Q86YC2	PALB2	0.0267990199555954	3.23018890133601	0.231344390912458	0.825570004099874	0.999905554516238	-4.79558717022128
Q9Y4B5	SOGA2; MTCL1	-0.00266372895999952	3.35090543447286	-0.0245013648045588	0.981333611920395	0.999905554516238	-4.79577236893844
Q9P0V3-1	SH3BP4	0.052975464882059	3.22505702900688	0.483103022206491	0.647999060493597	0.999905554516238	-4.79623075189682
O43920	NDUFS5	-0.0793267750725526	3.24404261300591	-1.18062569191812	0.287182670978045	0.999905554516238	-4.79646058504468
Q9BZI7-1	UPF3B	0.0609403481600409	3.13564417397503	1.1720494015452	0.290331549007636	0.999905554516238	-4.7965342175362
Q8NA72	POC5	-0.0577474227083898	3.33244692696068	-1.07326357707894	0.328805278761117	0.999905554516238	-4.79685836632616
Q9H0Z9	RBM38	-0.0562275195307052	3.34001624873607	-0.716613973478592	0.503440692073804	0.999905554516238	-4.79687494009298
Q8TER5	ARHGEF40	-0.0819444636805352	3.23198869490953	-0.704177956801764	0.510559733380502	0.999905554516238	-4.79721618834597
Q8NET8-2	TRPV3	-0.0407233743456401	3.36713861292491	-0.303742811868679	0.772695291972603	0.999905554516238	-4.79752281657204
Q9BT92	TCHP	-0.00550530668372005	3.31272889685089	-0.0474671407992298	0.96384891582558	0.999905554516238	-4.79775588385835
O14880	MGST3	-0.121189885189335	3.0874188249027	-1.23183859910046	0.268995925937555	0.999905554516238	-4.79781953379186
A2RU67	KIAA1467; FAM234B	0.0647283869135677	3.38871565016964	0.941787977193946	0.386542473695578	0.999905554516238	-4.79788879059413
P51606-1	RENBP	-0.0666629410174728	3.4302040992745	-0.912869260436766	0.400273984834254	0.999905554516238	-4.79795873751442
Q14126	DSG2	-0.0850686912722772	3.17236471834064	-1.61055872271796	0.163923633424332	0.999905554516238	-4.79796475545985
Q7Z7F7-2	MRPL55	0.435044274485068	3.38419005372231	0.791789051445263	0.461871359151136	0.999905554516238	-4.79800747794981
Q6P9G4	TMEM154	0.066985436374392	3.36749077439149	0.298313693720211	0.77661738964198	0.999905554516238	-4.79826373805982
O96006	ZBED1	0.0363868528742529	3.34412020544032	0.354586794702875	0.736345468682197	0.999905554516238	-4.79847145849937
Q9Y282-3	ERGIC3	-0.072017018782211	3.32849643686406	-1.36882884799241	0.225311535028027	0.999905554516238	-4.79866431475438
Q9NRZ7-3	AGPAT3	-0.121449761316123	3.20764552228408	-1.30901232195927	0.243525228861962	0.999905554516238	-4.79925663532009
Q92581-2	SLC9A6	-0.0869898131957331	3.30449434949841	-0.757234837515315	0.480664847655273	0.999905554516238	-4.79953970848636
Q5VV67-1	PPRC1	-0.0097488361721935	3.44204582923435	-0.0826494417413216	0.937110828529271	0.999905554516238	-4.79968060571142
Q9P2W1	PSMC3IP	-0.04260529259	3.25145854025469	-0.47305526292396	0.65470360161388	0.999905554516238	-4.80038743857724
Q9H9D4	ZNF408	-0.0255935433997729	3.44806799851033	-0.25845436150659	0.805631916957166	0.999905554516238	-4.80039314673544
Q8TEJ3	SH3RF3	-0.0704088908507479	3.41041675233573	-0.569305873576823	0.592042721406211	0.999905554516238	-4.80041635308614
O00628	PEX7	-0.0105032072193634	3.17066059753987	-0.0928884072427433	0.929344890968166	0.999905554516238	-4.80066852627894
Q9Y324	FCF1	-0.0631555719302816	3.16566925942824	-0.969080905038886	0.373927354091109	0.999905554516238	-4.80083375008179
Q9BXS4	TMEM59	0.0447333116076078	3.22946641186174	0.444010738105145	0.674286714775281	0.999905554516238	-4.80130102780035
Q9BSI4-2	TINF2	0.0596129604581913	3.35575325113894	0.658632005179132	0.537210358155876	0.999905554516238	-4.80148689003388
Q6P087	RPUSD3	0.0673892396672824	3.25028273552291	0.749795288150002	0.484781161369956	0.999905554516238	-4.80172487908581
Q6ZMK1	CYHR1	-0.064060591008977	3.35839925766469	-0.795550657977223	0.459857906177357	0.999905554516238	-4.80219749719747
Q9Y366	IFT52	0.0498282958358998	3.16149127037342	0.458095816360084	0.664752775623548	0.999905554516238	-4.80225294671961
Q9UBV7	B4GALT7	-0.0240867550970923	3.32359353145034	-0.223593220806695	0.831298391195407	0.999905554516238	-4.80234105192147
Q6ZT07	TBC1D9	0.0317550364063165	3.30990654865173	0.270784114641394	0.796616940961003	0.999905554516238	-4.80240812729097
Q9BWH2	FUNDC2	0.0626612045762062	3.20477267594951	0.379093488320268	0.719087816780843	0.999905554516238	-4.80259711969799
Q9Y6A9	SPCS1	-0.0652570822298764	3.28426088587338	-1.2711175708988	0.255747571325114	0.999905554516238	-4.80304319803956
Q96MG8-1	PCMTD1	-0.0179616370390753	3.41494969548863	-0.120089769530503	0.908758476606488	0.999905554516238	-4.80336181953204
P51948-1	MNAT1	0.0632806631877649	3.27772061546241	0.736342808792154	0.492287173268229	0.999905554516238	-4.80411992086726
Q99943	AGPAT1	-0.119589736887421	2.99203047290591	-0.454160650233733	0.667409443612499	0.999905554516238	-4.80421371277032
Q969H4	CNKSR1	-0.0596407194127488	3.3922107703771	-0.867526319730396	0.422564165954231	0.999905554516238	-4.80428812985546
P08579	SNRPB2	-0.0732010065105946	3.26422988134182	-1.12510034117638	0.308105857173167	0.999905554516238	-4.80456350551438
P10914	IRF1	0.0607599516996757	3.33938185080593	0.626016368737871	0.55684413636089	0.999905554516238	-4.80470278012657
Q13433-1	SLC39A6	-0.0733761578429588	3.29356065490462	-0.853356642643491	0.429720684452231	0.999905554516238	-4.80488022718773
Q96H55-1	MYO19	0.0476723530283062	3.38204611222968	1.2468296728427	0.263868939672718	0.999905554516238	-4.80500690692176
Q6PCD5	RFWD3	-0.0318803773671322	3.17601056374262	-0.312731846428155	0.766218055145884	0.999905554516238	-4.80505066153733
P30038	ALDH4A1	0.0823908523468056	3.22235177826632	1.14617205978909	0.300015422110718	0.999905554516238	-4.80515835927034
O15050	TRANK1	-0.0308916927521607	3.34754298726889	-0.223123728865424	0.831645740902502	0.999905554516238	-4.8053528014775
Q96B70	LENG9	0.0576761445704318	3.2790010484103	0.650149134767412	0.54227317869057	0.999905554516238	-4.80542599775888
Q9BXR0	QTRT1	-0.0543130202987388	3.31255338531328	-1.06896236885944	0.330574394258314	0.999905554516238	-4.80547662331745
Q92902-1	HPS1	-0.0542378096998789	3.35377035356007	-0.554918975798099	0.601180629908764	0.999905554516238	-4.80608824587684
P08174-7	CD55	-0.0593495786077323	3.23270218351903	-0.462744432983175	0.661621485980016	0.999905554516238	-4.80609446540392
Q9BT17-1	MTG1	0.0721757382399999	3.26700802662158	1.19961699724612	0.280315958373302	0.999905554516238	-4.80611129577846
Q9H6X4-1	TMEM134	-0.0552867393995853	3.36873268280643	-0.683894781445186	0.522316643421915	0.999905554516238	-4.80661960182711
Q9GZM5	YIPF3	-0.0670950984768183	3.25786566180485	-1.05374684405144	0.336896741560727	0.999905554516238	-4.80694570798354
P01130	LDLR	-0.0964835224760786	3.25207253824018	-0.718325234436598	0.502466416270408	0.999905554516238	-4.80714333353847
Q8N8D1	PDCD7	0.0528763059968538	3.3200375538346	0.422879659765115	0.688717819389893	0.999905554516238	-4.80739792237907
Q49A88-1	CCDC14	-0.0743520017837373	3.1665465388596	-0.808511440940813	0.452969364568227	0.999905554516238	-4.80785990781916
Q9P0K8	FOXJ2	0.0399371013544844	3.26872133111974	0.29665331247678	0.777818366399869	0.999905554516238	-4.80790999849786
Q9H3U1	UNC45A	-0.0434201182360144	3.32396465091283	-1.75837746047411	0.134724028482578	0.999905554516238	-4.80801989306995
Q5JPE7	NOMO2	0.0858279097193673	3.32116075598497	0.670040804742137	0.53045007327905	0.999905554516238	-4.80803630802016
Q7RTS9-1	DYM	-0.0588509765140141	3.31692399114578	-0.669278016222022	0.53090031071353	0.999905554516238	-4.80830453151286
Q9Y6Y9	LY96	-0.0263328947384955	3.35852238171286	-0.232611424974983	0.824634756882886	0.999905554516238	-4.80837028042315
Q9H5I1	SUV39H2	0.0550041047110363	3.29698427952729	0.794457270547892	0.460442499439137	0.999905554516238	-4.80841485011104
O95685	PPP1R3D	0.0608640905061718	3.31629446990809	0.752331589649339	0.483375041891244	0.999905554516238	-4.80860846528707
O75896	TUSC2	-0.0491653287968727	3.36608499147647	-0.481705879527947	0.648929132180593	0.999905554516238	-4.80899876650679
O94763-1	URI1	-0.0429052553762918	3.28164171070226	-0.445508787338257	0.673269433198588	0.999905554516238	-4.80919946155621
P48730-2	CSNK1D	0.0126848634706476	3.27605083373291	0.115476419903584	0.912244827258599	0.999905554516238	-4.80936012179294
Q8IUZ5	AGXT2L2; PHYKPL	0.0598211620421146	3.33802437578764	1.11683065342309	0.311331760434101	0.999905554516238	-4.809922802367
P31321	PRKAR1B	-0.0660512080136928	3.40178013647661	-0.787318295728986	0.464272689542661	0.999905554516238	-4.81007914316619
O75886	STAM2	-0.0735482265483917	3.27532906377328	-1.39562068002225	0.217567826207018	0.999905554516238	-4.81023959295826
Q15126	PMVK	-0.0489673185448226	3.42663409079581	-1.2036946736166	0.278860534620248	0.999905554516238	-4.81026984405609
Q9UGL1-2	KDM5B	-0.0294081047564715	3.23578479439805	-0.242680286878841	0.817214168295638	0.999905554516238	-4.81045759204536
Q9BR76	CORO1B	0.0550772602711769	3.07714930965479	1.29516825593353	0.247927744302441	0.999905554516238	-4.81057343111618
O43502	RAD51C	-0.016902871846266	3.0758499850834	-0.1673048545345	0.873223897750648	0.999905554516238	-4.81059126109228
Q6PCB8	EMB	-0.0846221519344932	3.29920298148697	-1.12641030740109	0.307597490811967	0.999905554516238	-4.81091275144247
Q9NZ43-1	USE1	-0.0275853832867057	3.29267753374155	-0.256832663263575	0.806820170520977	0.999905554516238	-4.81100324219485
Q8TF42	UBASH3B	-0.108934627707511	3.38129684143794	-0.763710267468066	0.477102145561413	0.999905554516238	-4.81105794870537
O00116	AGPS	-0.058893060195531	3.22729005600963	-1.47682509099155	0.195588369159263	0.999905554516238	-4.81122685373049
Q8WUR7	C15orf40	-0.0593223409333748	3.31354796265459	-1.05771205367465	0.33523946882181	0.999905554516238	-4.81134797097253
P84095	RHOG	-0.0570135989668217	3.27291989330186	-1.23073496765515	0.269376850871671	0.999905554516238	-4.81195499574178
O43708	GSTZ1	0.0603992003110438	3.26493568672431	0.859559050833579	0.42657691239788	0.999905554516238	-4.81231625537101
Q8WXD5	GEMIN6	-0.0520210435995593	3.21534094921542	-0.88375359143375	0.414480130453708	0.999905554516238	-4.81258441870035
Q9Y584	TIMM22	-0.0445734765034387	3.06126922257297	-0.454643889457152	0.667082911301873	0.999905554516238	-4.81262913871647
Q9BUN8	DERL1	-0.105311168031082	3.31328684954696	-0.928199044214705	0.392948037927475	0.999905554516238	-4.81292756622202
O94916-5	NFAT5	-0.00437203032341005	3.2263209226929	-0.0386361959628698	0.970570165308272	0.999905554516238	-4.81307691530469
Q7Z6B0-1	CCDC91	-0.059188937325294	3.30939555723195	-1.18170470355957	0.286788620272166	0.999905554516238	-4.81309571463705
Q8IYU2-1	HACE1	-0.0568005872863565	3.28885642635318	-0.677741195407591	0.525919018092742	0.999905554516238	-4.8135169156853
Q9UKV5	AMFR	-0.0782042438990795	3.12415648073791	-0.630429804734882	0.554160931123088	0.999905554516238	-4.81356045985628
Q96HY6-1	DDRGK1	-0.0960477816399512	3.20830988892175	-1.06476177188116	0.332309824392538	0.999905554516238	-4.81356345015854
Q92567-2	FAM168A	0.0556436502211475	3.14629971636285	0.57611938040895	0.587744091102969	0.999905554516238	-4.81360078026386
O75382-1	TRIM3	0.0844221409049268	3.09752785732552	0.849646647091638	0.431609473723189	0.999905554516238	-4.81375821577885
P57105	SYNJ2BP	-0.0590297635865317	3.07774417022733	-0.716228363043533	0.503660411151934	0.999905554516238	-4.8138316315101
P34059	GALNS	0.0655255042554316	3.14528535605272	0.784572927831835	0.465751742788846	0.999905554516238	-4.81411343215956
Q15208	STK38	-0.0517413392431836	3.33068185822161	-1.33673973918774	0.234921001813382	0.999905554516238	-4.81416562413764
Q14257-2	RCN2	-0.0610418747674613	3.24474006587123	-1.49744597554768	0.19035020978933	0.999905554516238	-4.81451939477891
Q96IW7	SEC22A	-0.0360586098875827	3.26976160946997	-0.370986470395714	0.724776871549689	0.999905554516238	-4.81454928320336
Q15173	PPP2R5B	-0.00413799929626282	3.37196737876467	-0.0396393665179614	0.969806501791852	0.999905554516238	-4.81456903541847
Q13530	SERINC3	-0.0290729652052637	3.34275896009367	-0.218023658357157	0.835421721960276	0.999905554516238	-4.81472500439511
P84157-1	MXRA7	0.126703256965099	2.67625334517708	0.616986624099117	0.562359425232659	0.999905554516238	-4.81473008535305
Q15293	RCN1	-0.0382243039102707	3.3261346078528	-1.63376440116022	0.158959222330693	0.999905554516238	-4.8147422805749
Q495W5-1	FUT11	0.00457539999192596	3.25763940728761	0.0441585607857371	0.966366724831408	0.999905554516238	-4.8153210414607
P51575	P2RX1	-0.0285800417715401	3.36949173781994	-0.258636497060912	0.805498498631993	0.999905554516238	-4.8155388599376
Q9NVM6	DNAJC17	-0.064612175831113	3.28466850468301	-1.14754287675571	0.299495502510653	0.999905554516238	-4.8157702285203
Q9NXK8	FBXL12	-0.0582744478277342	3.30169460500332	-0.765248875196607	0.476258385220587	0.999905554516238	-4.81579983931555
Q9HCU9	BRMS1	-0.0850660929682703	3.32888388627776	-0.995057266349864	0.362229517713408	0.999905554516238	-4.8161167997798
Q7Z449-1	CYP2U1	-0.077253822144537	3.26440989504045	-0.756986145889945	0.480802049161323	0.999905554516238	-4.81625605755417
Q9GZM8-2	NDEL1	-0.0512986706351849	3.34394588576313	-0.545959024419525	0.606913185180117	0.999905554516238	-4.8165096328521
Q96I25	RBM17	-0.0342615323840852	3.26101735961312	-1.52645050498815	0.183208074291566	0.999905554516238	-4.81654132946433
A2RUC4	TYW5	-0.0815840955087681	3.40627411691696	-0.946693922999437	0.384250285501196	0.999905554516238	-4.81661444497294
P84085	ARF5	-0.0640108494449571	3.33132483043422	-1.33365439456366	0.235864503531429	0.999905554516238	-4.81673780906895
Q2YD98-1	UVSSA	0.00688813821664333	3.35063674348969	0.0528419695725184	0.959759717394334	0.999905554516238	-4.81681798616153
Q9BXS9-1	SLC26A6	-0.0774008924155305	3.32756015019636	-0.908106922401157	0.402571431525546	0.999905554516238	-4.81688577658223
Q9H920	RNF121	-0.0555641601868999	3.21194307138051	-0.825008092390175	0.444311331043447	0.999905554516238	-4.8169183735639
Q13740-1	ALCAM	-0.121388848802934	3.1002004711702	-1.32483979051789	0.238579150946594	0.999905554516238	-4.81702099715671
Q9H400	LIME1	-0.0585813122893785	3.38440829943845	-0.99564717322556	0.361967347348406	0.999905554516238	-4.81747792661175
Q86T03-2	TMEM55B; PIP4P1	0.0484381931099913	3.22584755122128	0.533809404463427	0.614736882393635	0.999905554516238	-4.81755656479667
Q9HC35	EML4	0.0325806244416519	3.37144683100085	1.94116816114242	0.105696789573264	0.999905554516238	-4.81766387987962
Q9UHL9-3	GTF2IRD1	0.0388226912360779	3.21122093874969	0.435454887455313	0.680111523931127	0.999905554516238	-4.81767976199043
P40123	CAP2	0.074247227455767	2.47186370496285	0.807858382317889	0.453314644668494	0.999905554516238	-4.81811067032652
P19484-1	TFEB	-0.0477917312255855	3.40513761019573	-0.419267213549823	0.691199911633581	0.999905554516238	-4.81818926474811
Q8TD26	CHD6	0.0626528645461976	3.33964557483236	0.737986947505052	0.491365475902852	0.999905554516238	-4.81824794793756
Q9UBU8-1	MORF4L1	-0.0604510977980063	3.10411469087354	-1.18805062725219	0.284480671819601	0.999905554516238	-4.8184252828692
Q9Y3S2	ZNF330	-0.0629323323711865	3.27752580862176	-1.10565875142085	0.315735558034068	0.999905554516238	-4.81845332455516
Q96L93-2	KIF16B	-0.050482741102314	3.24238761025452	-0.568148492593313	0.592774771003994	0.999905554516238	-4.81874521243167
Q15542	TAF5	-0.0920537692294457	3.2863591139763	-1.28410832998621	0.251496551176086	0.999905554516238	-4.8187468480902
O00534	VWA5A	-0.0549731125003916	3.39889298661649	-0.783689439702383	0.466228439435644	0.999905554516238	-4.81912694647413
P36508	ZNF76	-0.00467835249629891	3.2819948794549	-0.0441161804982438	0.966398978866357	0.999905554516238	-4.81922671253901
Q8NFZ5-1	TNIP2	0.00794920455776299	3.35874142746759	0.0756114929752404	0.942453466175754	0.999905554516238	-4.81928441768737
Q9Y5Z9-1	UBIAD1	-0.0604296492770949	3.4066495986045	-0.917452130341604	0.398072778427222	0.999905554516238	-4.81946543018115
Q9H3L0	MMADHC	-0.0260878264183485	3.12266301350962	-0.232872592312592	0.824442019246591	0.999905554516238	-4.81947776439519
Q9BYV9	BACH2	-0.0157092651404232	3.40509956289696	-0.160447256868086	0.878366666202613	0.999905554516238	-4.8197192076935
Q9Y371-2	SH3GLB1	-0.0824654216644654	3.30842727796693	-1.26380345885357	0.258169345827451	0.999905554516238	-4.81973978404661
Q8TC05	MDM1	0.049054135525224	3.37856184855967	0.68017793908577	0.524490552472545	0.999905554516238	-4.81977874512083
Q9UGJ0	PRKAG2	-0.00663458734423907	3.35002166343256	-0.0671304931071356	0.948895996677294	0.999905554516238	-4.82007936916983
Q96EU6	RRP36	-0.0514155467008718	3.16091968755593	-0.537053826826205	0.612642007606272	0.999905554516238	-4.82009659830291
Q14194-2	CRMP1	0.347526624155766	1.86922325652377	1.1023920051501	0.317033240071617	0.999905554516238	-4.82042629430503
Q712K3	UBE2R2	-0.052060326860964	3.29398426462951	-1.00540444470612	0.357653295160235	0.999905554516238	-4.82050679250655
Q9Y221-1	NIP7	-0.0435264554707079	3.3082205163357	-1.18339673075808	0.286171650703827	0.999905554516238	-4.82087621199837
Q5TGY1	TMCO4	-0.0800303398660398	3.38350924167838	-1.071039322664	0.329719134660542	0.999905554516238	-4.82120892932982
Q9Y4C2-1	FAM115A; TCAF1	0.0655989904648972	3.16353939464286	1.48046009228297	0.194655173312143	0.999905554516238	-4.82129952835005
Q00536-2	CDK16	-0.0559319468026245	3.22061352500371	-0.635212809167127	0.551262335075556	0.999905554516238	-4.82177500459516
Q9NSU2-1	TREX1	0.0651884693749945	3.37015691200484	0.853731049026467	0.429530417441016	0.999905554516238	-4.82178331476715
Q8N3Z3-1	GTPBP8	0.01542405600682	3.24490791705908	0.122214688576573	0.907153418459519	0.999905554516238	-4.82181859712964
Q5T9A4	ATAD3B	-0.0588670918917791	2.55143305750158	-0.811664032871269	0.45130526122904	0.999905554516238	-4.82197686128803
P61601	NCALD	-0.059816117602116	3.34652828105686	-0.622523548799305	0.558973458729768	0.999905554516238	-4.82249258908905
Q8TEV9	SMCR8	0.0256523482601692	3.22286346862898	0.264193612264473	0.801431348090235	0.999905554516238	-4.82288956162559
Q8IYR2	SMYD4	0.0289287521809352	3.19190093787023	0.309716115705249	0.76838876946107	0.999905554516238	-4.8229040615795
Q6UXT9	ABHD15	-0.027545391270172	3.34036911884675	-0.228053395035452	0.82800071594521	0.999905554516238	-4.82295307246476
O60308	CEP104	-0.0272003867511759	3.4011285511627	-0.25709176405404	0.806630282740411	0.999905554516238	-4.82323189814624
P30405	PPIF	0.16197553973487	3.37562140679078	1.4359660913638	0.206372926206014	0.999905554516238	-4.8234961444119
P17707-1	AMD1	-0.0590648020681858	3.33412228658758	-0.615376774456615	0.563346298229395	0.999905554516238	-4.82369295818581
Q05682-3	CALD1	0.210676933491151	1.09307821655677	1.15875827950738	0.295270948212436	0.999905554516238	-4.82407148075532
Q8IWE2	FAM114A1	-0.0884892521561064	3.2989523186093	-0.749987697504428	0.484674389332156	0.999905554516238	-4.82447711413705
Q8IWT6	LRRC8A	-0.068424641330986	3.16672280839069	-0.864019980624319	0.424326605169011	0.999905554516238	-4.82459547106074
Q9P086	MED11	0.0028161806277756	3.1992441591496	0.0287673946485493	0.978084516782284	0.999905554516238	-4.8246342456382
Q9P0I2	EMC3	-0.0868726042807079	3.06631199304313	-0.953406388086717	0.381131532361713	0.999905554516238	-4.82469868067408
Q9UL26	RAB22A	-0.0717619960843526	3.30606528909997	-1.13422562534075	0.304579484760845	0.999905554516238	-4.82575225291375
P78345	RPP38	-0.0606165534882017	3.29489143448449	-1.17754804614132	0.288309215258212	0.999905554516238	-4.82614541684875
P06753	TPM3	-0.0158896266243903	3.3333413311812	-0.161214558738749	0.877790900943005	0.999905554516238	-4.82623694348365
Q9Y5U2-1	TSSC4	0.0102362044831443	3.3296288491933	0.0876595871124369	0.933309757024966	0.999905554516238	-4.82669131010943
Q13635-1	PTCH1	0.0648517725597744	3.34872826227739	0.718477447887187	0.502379818963299	0.999905554516238	-4.82671533797047
Q96L50	LRR1	-0.0271763485131299	3.34192193111154	-0.284172114607054	0.786868049558874	0.999905554516238	-4.82679240956089
P17028-1	ZNF24	0.145090784684956	3.34529180080099	1.2153175541462	0.274748525915914	0.999905554516238	-4.82683284773838
Q5TEU4	NDUFAF5	-0.00604774878592232	3.31691147736729	-0.0632028748971561	0.95188108893782	0.999905554516238	-4.82726196787082
O95503	CBX6	-0.0245909258189054	3.33319631042581	-0.257705653501415	0.8061804393426	0.999905554516238	-4.8273589820719
Q9H936	SLC25A22	0.056584358273702	3.15059758039732	1.15074638992291	0.298283518121735	0.999905554516238	-4.82768807110584
O95070	YIF1A	-0.0648315276260789	3.31344886572332	-0.583486652542333	0.583117250154818	0.999905554516238	-4.82773353813477
P29466-1	CASP1	-0.0454947863973305	3.41748248285427	-1.57290277713199	0.172301862327935	0.999905554516238	-4.82783624180383
P20036	HLA-DPA1	-0.0781045122688507	3.42357160635039	-0.965340710176524	0.375636412827571	0.999905554516238	-4.82806230119213
Q9Y227-1	ENTPD4	-0.00785742335965993	3.33290639882955	-0.0816231376058241	0.937889693374333	0.999905554516238	-4.82818365873928
Q9BU61-1	NDUFAF3	0.0547915783684501	3.32235279990624	1.1961541044321	0.281557192967089	0.999905554516238	-4.82827873255178
P50225	SULT1A1	0.0305884641755777	3.45381851183961	0.293116370330493	0.780378982443184	0.999905554516238	-4.82879933830025
P21281	ATP6V1B2	-0.0377830036030635	3.35123632007306	-1.76525148200147	0.133499327089898	0.999905554516238	-4.82894559898462
Q6N063-1	OGFOD2	-0.049009899028175	3.33646266098722	-0.500351510483186	0.636575969380945	0.999905554516238	-4.82903236021421
O15254	ACOX3	-0.0600677583330693	3.33913041092654	-1.17514944386733	0.28918987547928	0.999905554516238	-4.82904462959792
O95402-1	MED26	0.0494560761855111	3.34795684203411	0.93252016442763	0.390902140585095	0.999905554516238	-4.82910042620954
Q6PIZ9	TRAT1	-0.0782392866552822	3.33049363489555	-0.840399552693985	0.436344381607656	0.999905554516238	-4.82922762815031
Q8IX18	DHX40	0.0771157082858983	2.73112790117462	1.00004459262073	0.360017872278013	0.999905554516238	-4.82936686418739
Q9Y657	SPIN1	0.0668857917271086	3.30639844754828	1.10701224308183	0.315199222333145	0.999905554516238	-4.82967195446929
Q13444	ADAM15	-0.0734648561226931	3.23294349197642	-0.60078941910877	0.572337896969396	0.999905554516238	-4.8297762658132
Q9NZN3	EHD3	0.111402398757218	3.46689063917082	1.24549295060238	0.264322538340035	0.999905554516238	-4.83000745923224
Q9H1B5	XYLT2	0.0458044002893878	3.28098947048005	0.57518976964614	0.588329475960647	0.999905554516238	-4.83029855199024
Q9NU19	TBC1D22B	0.00963533537923357	3.30357203721202	0.0862342293527529	0.934390943964981	0.999905554516238	-4.8304029000368
P46937-9	YAP1	0.072239464612849	2.81147316843736	0.40611535878782	0.700272764009639	0.999905554516238	-4.83045012335169
O14967	CLGN	-0.1160176288661	2.99969147785102	-0.834259718248008	0.439509632724095	0.999905554516238	-4.83100545272686
Q15493-1	RGN	-0.0820275836105023	3.49211565772762	-1.02267230736744	0.350121487044876	0.999905554516238	-4.83102574330862
Q9BVV7	TIMM21	-0.0692657950021139	3.09015301000245	-0.532576042998498	0.615534318800612	0.999905554516238	-4.83128352606262
P09038-4	FGF2	-0.00446596510086879	3.33814749221044	-0.0418841074357837	0.968097824632667	0.999905554516238	-4.83175994036216
Q15773	MLF2	0.0534221832026213	3.25834559727349	0.932465694066339	0.390927878092101	0.999905554516238	-4.83230612923492
P49902	NT5C2	-0.0553217500515396	3.34147809193799	-1.33577130620767	0.235216776842317	0.999905554516238	-4.83241696517984
P78559-2	MAP1A	0.313869540203977	1.52763909166244	1.23924399414514	0.266452277155894	0.999905554516238	-4.83254773799192
O95169	NDUFB8	0.0641643283462427	2.95951378504551	0.427136756682593	0.685798372564271	0.999905554516238	-4.83327641019592
Q9Y512	SAMM50	-0.102091933098568	3.13717513956627	-1.37935515921755	0.2222391282532	0.999905554516238	-4.83339363307502
Q68D51	DENND2C	-0.0331667340374333	3.35656762603337	-0.302377836343735	0.77368067199666	0.999905554516238	-4.83342934747059
O15062	ZBTB5	0.0314792319654866	3.34691002645126	0.282496010997527	0.788086226809213	0.999905554516238	-4.83349668441137
Q9Y2G8	DNAJC16	-0.114080128898861	3.20435303848128	-1.03351986098961	0.34545705379276	0.999905554516238	-4.83364647005809
Q9Y4D8-5	HECTD4	0.0377875576026493	3.22563000907079	0.369084865806403	0.726114193291033	0.999905554516238	-4.83364844848982
Q9NZ71-2	RTEL1	0.0583045592693913	3.332213349823	0.732639881199823	0.494367422829157	0.999905554516238	-4.83365041626518
Q9P1U0	ZNRD1	0.0599881010045713	3.27758059828036	0.570546854482116	0.591258393423811	0.999905554516238	-4.83365724090556
Q14644	RASA3	-0.058610905003514	3.37527760840228	-1.44430746128433	0.20412673688887	0.999905554516238	-4.83404974292688
Q8N5K1	CISD2	-0.0888705319541165	3.14276208474411	-0.962451799049879	0.376960759537974	0.999905554516238	-4.83406823527403
Q5R3I4	TTC38	-0.129229253126495	3.3310100792563	-1.19404025561025	0.282317249589678	0.999905554516238	-4.834088450805
Q49AM3-1	TTC31	-0.0475298824549841	3.35422226966923	-0.483903131326946	0.647466752395077	0.999905554516238	-4.83409258375371
Q6AI12	ANKRD40	0.0343404870231136	3.21475063460947	0.341343601951403	0.74574463184902	0.999905554516238	-4.83417868915468
Q9BU70	C9orf156; TRMO	0.0130398229850637	3.36825893151426	0.111859313541957	0.914979848554755	0.999905554516238	-4.83419441880645
O14713-1	ITGB1BP1	-0.0557754056716802	3.4257660698281	-0.59935752728431	0.573225268639158	0.999905554516238	-4.83447461890393
P61599	NAA20	0.0405762120918908	3.3059708551427	0.451384377702969	0.669286998137701	0.999905554516238	-4.8351549357574
Q9H0A8-1	COMMD4	-0.0906147025488848	3.41435563070367	-1.13907147681891	0.302720996917756	0.999905554516238	-4.83526462259125
Q7Z5Y7	KCTD20	0.0342575226072335	3.26749167765834	0.389327662444251	0.71193486083159	0.999905554516238	-4.83607044206105
Q9BUV8-5	C20orf24	-0.0778540093226738	3.23637351640392	-0.601474011135671	0.571913941241783	0.999905554516238	-4.83636261280926
Q8IWL3	HSCB	-0.0211997210757151	3.197067994995	-0.218342830679952	0.835185267806739	0.999905554516238	-4.83649277137736
P62854	RPS26; RPS26P25; LOC101929876	-0.0464205613472435	3.23546353009262	-1.33808257784503	0.234511441005694	0.999905554516238	-4.8365167851879
Q8N4S0	CCDC82	0.00259122611904463	3.37240067296783	0.0188014935258144	0.985675365862139	0.999905554516238	-4.83664746032021
O15460-1	P4HA2	-0.023042017703665	2.72463580433992	-0.191099951268594	0.855434722534647	0.999905554516238	-4.83682736644553
Q9NZD1-1	GPRC5D	-0.0805563255524722	3.37906709467355	-0.76130227754794	0.478424798251129	0.999905554516238	-4.83702745452079
O14578-4	CIT	0.0379536321152966	3.04937872288736	1.35547626882592	0.229265307718291	0.999905554516238	-4.8370591337561
Q9H5V9-1	CXorf56	-0.0400220692941732	3.2340286972746	-1.32727365366124	0.237826750517853	0.999905554516238	-4.83731262866113
Q8TBM8	DNAJB14	0.000707257905437957	3.31228963191969	0.00604560379609928	0.995393638006298	0.999905554516238	-4.83760629306687
Q5T9C2	FAM102A	-0.0545010025393111	3.40852985303843	-0.647215528428018	0.544031211487928	0.999905554516238	-4.83798487252777
Q9NS23-4	RASSF1	0.0157164564142024	3.2821341398337	0.141909491681823	0.892301482518557	0.999905554516238	-4.83817726472795
Q3MHD2-2	LSM12	-0.0778986167333829	3.3234974252294	-1.1312219145712	0.305736391724725	0.999905554516238	-4.83819120503048
O00463	TRAF5	0.064794329878007	3.36258027566755	0.818408843064908	0.447760084757466	0.999905554516238	-4.83830755040783
P98173-1	FAM3A	0.00686028836692211	3.19686366760466	0.0619456692850154	0.952836786056895	0.999905554516238	-4.83831339877778
Q76N32	CEP68	0.048901924559053	3.24985194887149	0.51915320656983	0.624250912489238	0.999905554516238	-4.8384643964173
Q9NYA4	MTMR4	0.039662035968341	3.27308215460982	0.371802394662747	0.724203398897776	0.999905554516238	-4.8385792631235
Q86YB8	ERO1LB; ERO1B	0.0485146027917385	3.32079450616148	0.535536009775861	0.613621529363321	0.999905554516238	-4.8389722981386
O14772	FPGT	0.0884291733485451	3.3158498756844	1.13977082383172	0.302453590252553	0.999905554516238	-4.83935574293489
Q92930	RAB8B	-0.081463707452222	3.29759397828341	-0.803595959410331	0.455572972146969	0.999905554516238	-4.83954310261426
Q9Y222-1	DMTF1	-0.0128380054863076	3.3094748372741	-0.129798805922644	0.901428829004246	0.999905554516238	-4.83967334345996
Q9GZY6	LAT2	-0.0696478885309321	3.40238551161861	-0.820671518948696	0.446575395645627	0.999905554516238	-4.83971440258949
Q8N6G5-1	CSGALNACT2	0.0750981007802501	3.31735285672763	0.795474366612691	0.459898678810594	0.999905554516238	-4.8399888435687
Q969K3-2	RNF34	-0.0390184873092309	3.20478661771428	-0.438761974175865	0.677857092890471	0.999905554516238	-4.84008541764983
Q9NQG7-4	HPS4	0.0671797731268382	3.36442368480375	0.728008143721409	0.496978040569248	0.999905554516238	-4.84055750924287
P51956	NEK3	0.0298776920924018	3.18015948211707	0.306844796652668	0.770457732635326	0.999905554516238	-4.84056473998751
A6NI28	ARHGAP42	-0.0266868772988125	3.36771276071102	-0.262761550458506	0.802478785306312	0.999905554516238	-4.84066839619379
Q96HA7	TONSL	-0.0437151945782163	3.33402168303427	-1.37558250529904	0.223335801491442	0.999905554516238	-4.84082194465869
Q8TF76-1	GSG2; HASPIN	0.0742459032774326	3.3587540380239	0.829845331582719	0.441795916369108	0.999905554516238	-4.84085411622865
Q03252	LMNB2	0.0538885581667283	3.34348045844317	1.83867305088418	0.121093798675315	0.999905554516238	-4.84086319209936
Q8N3A8-1	PARP8	0.0443240842609937	3.33333114528694	0.559905875396518	0.598003812208586	0.999905554516238	-4.84116418328616
Q8WWV3-1	RTN4IP1	0.115227360155201	3.26835817649339	0.80432381127954	0.455186758899471	0.999905554516238	-4.8412465747208
Q96BQ5	CCDC127	-0.0123250746616464	3.42705839490941	-0.102902759901771	0.921757759523019	0.999905554516238	-4.841342190703
Q3KP66-1	C1orf106	0.0431415957149017	3.38554962438195	0.541996153298491	0.609458712553487	0.999905554516238	-4.84135301877077
Q8NEY8-2	PPHLN1	-0.0491852957787328	3.19686286283753	-0.916642467730327	0.398460980021966	0.999905554516238	-4.84147300298102
Q9BVA0	KATNB1	-0.0548654886005637	3.19840262888308	-1.1197617513422	0.310185085351551	0.999905554516238	-4.84148759397662
Q9BTF0	THUMPD2	-0.0197343948871176	3.32525012619621	-0.201485256519507	0.847699802740747	0.999905554516238	-4.84153194640702
Q63HM1	AFMID	-0.0684899876233445	3.44215274020693	-0.806987261710051	0.453775516741023	0.999905554516238	-4.84153452096886
Q9H2H9	SLC38A1	-0.129226943021959	3.10520079534508	-0.954258733824401	0.380736959172638	0.999905554516238	-4.84178692611527
Q9UBR2	CTSZ	0.0510701015907726	3.35180080889918	0.671637960417224	0.529508164512556	0.999905554516238	-4.84199458919885
P40337	VHL	-0.0209459204488196	3.30615284156309	-0.215164166098558	0.837540994510839	0.999905554516238	-4.84203676138664
P48651	PTDSS1	-0.024833035304161	3.21432880372706	-0.11466440479377	0.912858704345768	0.999905554516238	-4.84204472152641
Q8NC44	FAM134A; RETREG2	-0.0459895633824598	3.2447043399195	-0.470539350853875	0.656388100993212	0.999905554516238	-4.84209856056163
Q9NUD5	ZCCHC3	-0.0678250748763026	3.21065541811807	-1.05808961102441	0.335082022712508	0.999905554516238	-4.84232354232929
Q8WXG6-2	MADD	-0.0425904679892343	3.34119362101503	-0.563656457840215	0.595621103299824	0.999905554516238	-4.84335962888713
P98198-3	ATP8B2	-0.0549533099933205	3.29435346350376	-0.516160314785784	0.626203876993914	0.999905554516238	-4.84346542020798
Q9H1J7	WNT5B	-0.0657262588797363	3.44541308502737	-0.87667003211163	0.417994327395759	0.999905554516238	-4.84411507547723
Q7L804-2	RAB11FIP2	-0.0369386466529313	3.10815430994822	-0.287683241477521	0.784318393803836	0.999905554516238	-4.84419801595176
Q9P2B7	KIAA1430; CFAP97	0.0485940006530995	3.3914335998105	0.790525425414954	0.462549164264881	0.999905554516238	-4.84489034899238
Q9NX46	ADPRHL2	0.0541744000184901	3.38745473899017	1.49372118912017	0.19128641563497	0.999905554516238	-4.84514648593512
Q96HR3	MED30	-0.0262881613031483	3.3584866087181	-0.262810587879858	0.802442910762315	0.999905554516238	-4.8451777293068
Q8TA86	RP9	-0.0614758482937281	3.22679083698726	-0.961675746799647	0.37731715620196	0.999905554516238	-4.84614389114634
Q96S99	PLEKHF1	0.0221696758143127	3.31544119242027	0.234252395128453	0.823423973818203	0.999905554516238	-4.84622344026801
Q9H490	PIGU	-0.106840951682074	3.2203405756854	-0.789729518550197	0.462976455659351	0.999905554516238	-4.84666487440736
Q9UNA1-1	ARHGAP26	-0.0413181641801004	3.33882789779299	-0.530938617748778	0.616593916434433	0.999905554516238	-4.84673821026518
Q96BW1-3	UPRT	-0.0626290986600472	3.29715701824292	-0.839259848437313	0.436930639744316	0.999905554516238	-4.84681275593215
Q8IYA6	CKAP2L	-0.0160517806146271	3.3237261328909	-0.136607903263411	0.896294893618426	0.999905554516238	-4.84772890536804
Q9UHK6-5	AMACR	-0.036629384457174	3.38996148372204	-0.450799571822558	0.669682837545054	0.999905554516238	-4.84793357623977
O95677-2	EYA4	0.0160065612273487	3.26377387844895	0.171309172672009	0.870224108211896	0.999905554516238	-4.84801079280927
Q9BUP3-3	HTATIP2	-0.0972472710187584	3.34014164036665	-0.918446035386467	0.397596643894058	0.999905554516238	-4.84867640231352
Q4KMP7	TBC1D10B	0.0421350068499472	3.36433782671245	1.25860079782107	0.25990450566371	0.999905554516238	-4.8487819595528
Q6P0N0	MIS18BP1	0.0486104302416651	3.30656696702277	0.709352130840294	0.507589478845397	0.999905554516238	-4.84886814399177
P55211-1	CASP9	-0.0552799831421193	3.36031233623039	-0.69423129341213	0.516302697710067	0.999905554516238	-4.84902617122718
Q9H7U1-3	CCSER2; FAM190B	-0.0638222330051398	3.29708587658943	-0.534063424132718	0.614572717984348	0.999905554516238	-4.84908742712799
Q96K83	ZNF521	-0.0358188678108271	3.35935769700043	-0.399729392134203	0.704698393885655	0.999905554516238	-4.84913877986829
Q9H0Q0	FAM49A	-0.0320988031658185	3.2782214391858	-0.364052629768552	0.729658387850386	0.999905554516238	-4.84940919707718
Q13432	UNC119	-0.0243595171269802	3.23939370075308	-0.240928515341311	0.818503692598006	0.999905554516238	-4.84959344500273
Q6YHK3-1	CD109	0.033033304213468	3.34535033600749	0.368109870851836	0.726800289181926	0.999905554516238	-4.8496020663089
P56159-2	GFRA1	-0.0438670615316454	3.24693690381053	-0.367038638003907	0.727554435217654	0.999905554516238	-4.84964659039408
Q96EW2-1	HSPBAP1	-0.0688025103018056	3.34292700812712	-0.459130190014268	0.664055364858893	0.999905554516238	-4.85006542491336
Q96CD2-1	PPCDC	-0.0548987546119069	3.36898438419185	-1.13164470559179	0.305573321871121	0.999905554516238	-4.85040025792621
Q9UNY4-1	TTF2	0.0671443137212617	3.22241803018948	1.03054763866186	0.346729978670743	0.999905554516238	-4.85040918887324
Q86UD0	SAPCD2	0.00519974954423782	3.25006917428795	0.0469458783379911	0.964245563089696	0.999905554516238	-4.8507303002538
Q8IX03-2	WWC1	-0.0827157474300581	3.39494128818552	-1.0226717432122	0.35012173097255	0.999905554516238	-4.85082173194108
P10586-1	PTPRF	-0.0152256250117625	2.36674936254026	-0.107434730487896	0.918327207176926	0.999905554516238	-4.85083584781179
Q7L3B6	CDC37L1	-0.0660829439842757	3.36163322614774	-1.07701755678326	0.327267747304036	0.999905554516238	-4.85111727590133
O14653-2	GOSR2	-0.0652031629624468	3.21097655485845	-0.99941843315282	0.360294940302345	0.999905554516238	-4.85160147641245
P31785-1	IL2RG	-0.0913446683884661	3.36347680988745	-0.943945993326412	0.385532860550334	0.999905554516238	-4.85162147086554
Q68DQ2	CRYBG3	0.0609670548986861	3.38124731906362	1.34776096508635	0.231578880587526	0.999905554516238	-4.85174117382168
Q9NY74	ETAA1	0.0253705497383558	3.3909221715018	0.149275170852572	0.886759213338847	0.999905554516238	-4.85189541418069
P05412	JUN	-0.0285203133060892	3.03624989195294	-0.33662415882034	0.749106215980361	0.999905554516238	-4.85212656705805
Q7Z6J0-1	SH3RF1	0.0530003583391454	3.3429795642593	0.788774321446428	0.463489640657294	0.999905554516238	-4.85264908102462
Q96ND0	FAM210A	0.20064071926943	3.35446644180853	0.745091892309595	0.487396316483096	0.999905554516238	-4.85272259197464
Q8WW01	TSEN15	-0.0658392946173839	3.30416683438198	-0.836027698292568	0.438596441056975	0.999905554516238	-4.85278238916959
Q9GZP4	PITHD1	-0.0786389183605004	3.31008225134636	-1.18198064088374	0.286687925004476	0.999905554516238	-4.85295186676525
Q9GZU1	MCOLN1	-0.02014808647421	3.33460585622679	-0.166827918336643	0.873581348170234	0.999905554516238	-4.85329632701388
O75795	UGT2B17	-0.150676329515557	3.24588230595518	-1.11514901464439	0.311991268176255	0.999905554516238	-4.8533904793134
Q14872	MTF1	0.00572220293607991	3.41099453465268	0.0629279458390372	0.952090075696416	0.999905554516238	-4.85345672856963
Q6PJ61	FBXO46	-0.0462676547304496	3.27012078305469	-0.443834593920351	0.67440638005517	0.999905554516238	-4.85412759297938
Q5JS37	NHLRC3	-0.0587233885226158	3.39998858531665	-0.450194502116053	0.670092518488916	0.999905554516238	-4.85415903516235
Q8N4Q0	ZADH2	0.0513932950610852	3.21324931630652	0.753563773777917	0.482692959667967	0.999905554516238	-4.85416496636291
Q8WY91	THAP4	0.0256974192187823	3.31726841455462	0.282317805090279	0.788215784982035	0.999905554516238	-4.85421031381758
Q9UJK0	TSR3	-0.0773299763740289	3.3205626726225	-1.05558454156103	0.336127822280101	0.999905554516238	-4.85434689420286
Q92536	SLC7A6	-0.10460904785626	3.25651731377149	-0.876316888473366	0.418170118495085	0.999905554516238	-4.85436082206534
Q8N4A0	GALNT4; POC1B-GALNT4	-0.0537949804219361	3.30296761414122	-0.616967282663418	0.56237127551972	0.999905554516238	-4.85465852350709
Q9UQC2-1	GAB2	0.0571143978286879	3.2263085259449	0.99318985836707	0.363060460328983	0.999905554516238	-4.85502367227416
Q8NFH4	NUP37	-0.0557357561635969	3.3313097730369	-1.31837333593059	0.240588747331766	0.999905554516238	-4.85507955770293
Q96IY1	NSL1	-0.0499291306628796	3.31733445185637	-1.14744313324185	0.299533306674994	0.999905554516238	-4.8555119035265
Q8NFU7	TET1	-0.00540265193971675	3.22746275946224	-0.0494396372723551	0.962348078986065	0.999905554516238	-4.85554432711035
Q9Y5W8	SNX13	0.00154542668226071	3.22917687779765	0.0101063103779336	0.992299740047966	0.999905554516238	-4.8556076621392
Q96RD7-1	PANX1	-0.0892083729985084	3.18129581612412	-0.772289776700982	0.472410761138149	0.999905554516238	-4.85563191339272
Q9UKZ1	C2orf29; CNOT11	-0.0502850421149665	3.28176616459055	-0.960079400831155	0.378051113733041	0.999905554516238	-4.85574389943436
Q9UJC5	SH3BGRL2	0.0563018817589758	3.30735831519066	1.08417424976313	0.324353313981345	0.999905554516238	-4.85580943738202
Q8NFH8-1	REPS2	0.0186352379991972	3.38843531550381	0.200191586115659	0.848662303319005	0.999905554516238	-4.85581961486063
Q8N3J5	PPM1K	0.034578486976299	3.36468337557792	0.404766367937094	0.701206554451978	0.999905554516238	-4.85587131407452
Q9H668	OBFC1; STN1	-0.00781051063038494	3.30434476691939	-0.0766965083692983	0.941629583473043	0.999905554516238	-4.85604383160616
Q9UPV9	TRAK1	0.0366476294574647	3.29424083198498	0.365811463729569	0.728418785232455	0.999905554516238	-4.85633118398122
Q9Y4G2	PLEKHM1	0.0525171738290469	3.38186930930963	0.62944053813245	0.554761653756068	0.999905554516238	-4.85638281309294
P26374	CHML	-0.0495972003915354	3.24039565790354	-0.587070496112347	0.580874492146003	0.999905554516238	-4.85644888953637
Q9UQ84-1	EXO1	-0.0627023312443998	3.24896334947383	-0.916896587378487	0.398339107748981	0.999905554516238	-4.85683415125705
Q149N8	SHPRH	-0.0477632618212479	2.97313506900108	-0.687389057515034	0.520278398389423	0.999905554516238	-4.85687312135845
Q3ZCW2	LGALSL	-0.0437991873853364	3.28884516389438	-0.628515895105553	0.555323507953419	0.999905554516238	-4.85710055893727
Q99666	RGPD6; RGPD5	0.0467132540324161	3.10490563287784	0.676911554706233	0.526405958045505	0.999905554516238	-4.85717986440558
P38435-1	GGCX	0.0340700724191622	3.29304271910676	0.313742491706947	0.765491127558145	0.999905554516238	-4.85736619235559
Q9NUP1	BLOC1S4	0.0304558012828143	3.31575826828535	0.232522866937465	0.82470011452676	0.999905554516238	-4.85771402973418
Q9UHW5-2	GPN3	-0.0308156563936809	3.24367584821099	-0.295543935425996	0.778621179013565	0.999905554516238	-4.85843383128774
Q96F45	ZNF503	-0.0216824628839249	1.76029248417355	-0.169076296248505	0.871896546625618	0.999905554516238	-4.85846685188999
Q6ZSS7	MFSD6	-0.00869251663537459	3.40631774391682	-0.0913208357223321	0.930533302621075	0.999905554516238	-4.8586098033362
Q9Y4Z0	LSM4	-0.0424736018656237	3.34306566684185	-1.54913848126294	0.177800863317527	0.999905554516238	-4.8586575382861
Q86SR1	GALNT10	0.0552424684407725	3.38084803713447	0.904211714628499	0.404458169042261	0.999905554516238	-4.85870102739597
Q06609-4	RAD51	-0.0270439697340448	3.2217674197237	-0.310884015545739	0.76754783711127	0.999905554516238	-4.85886140136108
Q53TQ3-2	INO80D	0.0128505186721006	3.33993799540182	0.140953773086077	0.893021117366263	0.999905554516238	-4.85903735908424
Q86TV6-2	TTC7B	0.0527690784523176	3.23691337879929	0.905673628679184	0.403749252668639	0.999905554516238	-4.85913247273096
O43301	HSPA12A	0.0662467780269055	2.71098847704967	0.804832634546545	0.45491690883773	0.999905554516238	-4.85916542523007
Q8IWW6-1	ARHGAP12	0.00485517551974592	3.2332144733314	0.0445906921534969	0.966037850075752	0.999905554516238	-4.8592309632394
Q96NB3	ZNF830	0.0477770551691049	3.34066715422918	1.32110347213932	0.239738420020014	0.999905554516238	-4.86023699807116
P37275-2	ZEB1	0.0676639954317156	3.09941425511074	0.989173048629935	0.364853064546694	0.999905554516238	-4.86027214478974
Q8WZ73-1	RFFL	0.0146455117625542	3.35327246048381	0.0960833479575714	0.926923371356242	0.999905554516238	-4.86104366469849
Q15723-5	ELF2	0.04976735854045	3.27642103713099	0.677990471168612	0.525772769399393	0.999905554516238	-4.86122378081726
Q7Z309-3	FAM122B	0.0379611216707527	3.2302827782551	0.389384425467332	0.711895278347589	0.999905554516238	-4.86205475193886
Q03113	GNA12	-0.0565250803950771	3.3153730294027	-0.960550348048182	0.37783446619633	0.999905554516238	-4.86251160324998
P49069	CAMLG	-0.0302736569516524	3.20404861608352	-0.248094405901639	0.813232776422736	0.999905554516238	-4.86275866105035
Q9Y5N6	ORC6	-0.0367942923321181	3.21624000543788	-0.442056760564811	0.675614767050859	0.999905554516238	-4.86295494714128
O15155	BET1	-0.0668976511625368	3.23546446573744	-0.944172939538906	0.385426806787779	0.999905554516238	-4.86301205533994
P52758	HRSP12; RIDA	0.0697637154628717	2.62164085333809	0.847705793720078	0.432600062174482	0.999905554516238	-4.8630235003529
Q02952-1	AKAP12	0.419197159070205	0.883800858420778	1.6128778844178	0.163420774579593	0.999905554516238	-4.8633523260737
O00165	HAX1	-0.0642837222205188	3.38263423339765	-1.11678510117793	0.311349609481107	0.999905554516238	-4.86385743033998
Q9H0X4	ITFG3; FAM234A	-0.0747030831853683	3.25180398225965	-0.677348458421479	0.526149489447225	0.999905554516238	-4.86396082315849
Q8NEM7-3	FAM48A; SUPT20H	-0.060938300781763	3.29087330818808	-0.782928816431347	0.46663912435251	0.999905554516238	-4.86396876954375
O95905-3	ECD	-0.057402870320383	3.21054191488142	-1.00967005973475	0.355780523680364	0.999905554516238	-4.86407448559813
Q9BXM9-1	FSD1L	-0.0549589901459566	3.39930116492743	-0.752799210097586	0.483116108129545	0.999905554516238	-4.86429602064098
O60291-2	MGRN1	-0.0304435678334192	3.3032493973126	-0.359189618610521	0.733090543545156	0.999905554516238	-4.8643254453005
Q08043	ACTN3	-0.0333740938099534	3.3234642579005	-0.193590200006318	0.853578314371826	0.999905554516238	-4.86448853003482
Q8N0S6-2	CENPL	0.0653722523959875	3.3654572461934	0.398784390979346	0.705354412798335	0.999905554516238	-4.86450224202609
Q6UUV9-2	CRTC1	0.0459292581626848	3.36619827931875	0.620855034345522	0.559992442771621	0.999905554516238	-4.865078665335
Q9UPQ3-1	AGAP1	-0.0373962443472368	3.3567120291243	-0.447241046529627	0.672094073977192	0.999905554516238	-4.86560053956303
Q9BYN0	SRXN1	-0.0442800511393042	3.3173334285862	-0.595953073409665	0.575338474279099	0.999905554516238	-4.86576040619938
Q9Y3C7	MED31	-0.00664905006011542	3.30688840226674	-0.067020905568666	0.948979273675733	0.999905554516238	-4.86674473880326
Q9H2V7	SPNS1	0.0118123066418578	3.24491655436216	0.101971640836243	0.922462823102291	0.999905554516238	-4.86731734786046
Q9NRL2	BAZ1A	0.065060921311437	2.98918717170691	1.07624960794167	0.327581786188003	0.999905554516238	-4.8673579718934
Q8NBN7	RDH13	-0.0519775549936033	3.35263805474516	-1.10776553372281	0.314901058792791	0.999905554516238	-4.86738532850936
Q9BRX9	WDR83	-0.0450446046720926	3.32422614621957	-0.546111815770196	0.606815164089397	0.999905554516238	-4.86741526470749
Q5ZPR3	CD276	0.0315157017898071	3.09369049159276	0.276882571040307	0.792170913433082	0.999905554516238	-4.86757276731615
Q8N8Z6	DCBLD1	-0.0782470463880033	3.31993129237707	-0.721453252356487	0.500688882436409	0.999905554516238	-4.86767623790035
Q9UKE5-4	TNIK	-0.0401146918940793	2.97636057942085	-0.414836593108385	0.694250061755596	0.999905554516238	-4.86786317647048
Q8IZQ1-1	WDFY3	0.0230397638152896	3.16227627017109	0.236984952864471	0.821408980766418	0.999905554516238	-4.86796210469859
Q7Z422	SZRD1	-0.0464446836714272	3.31717395601361	-0.990325133724518	0.36433818504531	0.999905554516238	-4.86809311458875
Q9Y253-1	POLH	0.0699834812720085	3.4128167262853	0.810366280715066	0.451989738971253	0.999905554516238	-4.86829136404204
Q9H078-2	CLPB	-0.0662352852572587	3.29803203875552	-1.4384267592877	0.205707906527454	0.999905554516238	-4.86871141847817
O14732-1	IMPA2	-0.0272043992562271	3.26112604805296	-0.341419337663993	0.745690737496512	0.999905554516238	-4.86879593969706
P42892	ECE1	-0.0471295226468279	3.31344677962004	-1.12346630146008	0.308740997720131	0.999905554516238	-4.8688600531382
Q7Z6V5-1	ADAT2	0.0291174362952266	3.19444608337228	0.366279387337743	0.728089154102795	0.999905554516238	-4.86892391650261
Q15853	USF2	-0.0473331500270522	3.3343823868765	-0.566436429587942	0.593858647379475	0.999905554516238	-4.86899899418985
Q15059	BRD3	0.0441018723717673	3.14483806142562	1.27525325888271	0.254387262459728	0.999905554516238	-4.86930183512492
O43719	HTATSF1	-0.0253836028995488	3.29075590006105	-1.80423954734054	0.126760738888744	0.999905554516238	-4.86946600798698
Q14141-1	SEPT6	-0.0742502091851998	3.33047554502822	-1.50026445617951	0.189644699237322	0.999905554516238	-4.86970243484042
Q15696	ZRSR2	-0.0461106171082593	3.30966645627172	-0.570312457868486	0.591406489865461	0.999905554516238	-4.87023543358578
Q71SY5-3	MED25	-0.0407500258471081	3.32705330496593	-0.569442351801061	0.59195643373385	0.999905554516238	-4.87042899938843
Q9UPN6	SCAF8	0.0592103454156393	3.23933275857493	1.36927854428425	0.225179479262075	0.999905554516238	-4.87064301224706
Q6ZUM4-1	ARHGAP27	-0.0624766525953356	3.38925157119653	-1.17535216817243	0.289115353411456	0.999905554516238	-4.8708306058114
O95379-4	TNFAIP8	-0.0636367314082658	3.3947566359253	-0.779757371433409	0.468354295378726	0.999905554516238	-4.87091332879689
O60346	PHLPP1	0.0406755253309474	3.35660120802392	0.485416962164024	0.64646024990563	0.999905554516238	-4.87110129753055
O00716	E2F3	-0.0117116943267904	3.41898612249202	-0.0894723277487705	0.931934957069641	0.999905554516238	-4.87118848390247
Q92994	BRF1	0.036404086474711	3.28191759958345	0.42512594212375	0.687176600956314	0.999905554516238	-4.87125853352655
Q66K64	DCAF15	0.0154508333573288	3.17615290728218	0.177441084903713	0.865635174430435	0.999905554516238	-4.87134770081672
Q0VDF9	HSPA14	-0.0622295001428364	3.28881926118333	-1.55694891366842	0.175975147124903	0.999905554516238	-4.87136119710902
P50548	ERF	0.00644939825879002	3.24613236919094	0.0614096691407288	0.953244267237436	0.999905554516238	-4.87141775895186
Q96GA3	LTV1	-0.0460544085228751	3.2889050383123	-1.25308326007526	0.261756091400544	0.999905554516238	-4.87163174167094
Q96EH3	MALSU1	0.0452694349151769	3.34450314922278	0.305459138553353	0.771456946280651	0.999905554516238	-4.87239673344933
Q92609-2	TBC1D5	-0.0409172530962559	3.31190537640508	-1.48949451077085	0.192354072871764	0.999905554516238	-4.87259431628368
Q9Y6H1	CHCHD2	-0.00540529554832542	3.27352711981716	-0.0425809622565545	0.967567423080734	0.999905554516238	-4.8727115041669
P21796	VDAC1	-0.0877077458276148	3.16422514788047	-1.79125988190269	0.128965406631805	0.999905554516238	-4.87303123503565
P05556-1	ITGB1	-0.11335631689212	3.11789279724994	-1.31498775707013	0.241647036445565	0.999905554516238	-4.87336090938305
P36873-2	PPP1CC	-0.0579086921803733	3.24441120598706	-0.847781383071079	0.432561450336616	0.999905554516238	-4.87348681458804
P53804-1	TTC3	0.0374753764437481	3.24279226835074	0.416073108322861	0.69339816297896	0.999905554516238	-4.87356003432919
Q8WV44-1	TRIM41	0.0517083075960339	3.22960747475749	0.762800690194756	0.477601449723354	0.999905554516238	-4.87394890967419
P04440	HLA-DPB1	-0.00259975371281416	3.39733562825534	-0.0274887462544574	0.979058315008009	0.999905554516238	-4.87404400744682
Q6PK04	CCDC137	0.00744846625164215	3.22686824937621	0.0733281549333221	0.944187529053704	0.999905554516238	-4.87404409334037
P08754	GNAI3	-0.0867095357510439	3.1944615057066	-0.973530054650999	0.371902472194894	0.999905554516238	-4.8741027878676
A0PJW6	TMEM223	0.00392477889762493	3.2212787943533	0.0329050201924473	0.974933667734628	0.999905554516238	-4.87426201130412
P67812-3	SEC11A	-0.143703074164527	3.08763994021218	-1.08670475517703	0.323328062432091	0.999905554516238	-4.87429311297882
Q8TCN5	ZNF507	-0.0625306930704591	3.25649610483981	-0.766176701862159	0.475750085503031	0.999905554516238	-4.87443038197761
Q9P0T7	TMEM9	0.0302907739715225	3.26717235251966	0.126205921670321	0.904139977889437	0.999905554516238	-4.87453377176634
P63096-1	GNAI1	-0.0695769113219897	3.21601379123095	-0.821495819665709	0.44614438479151	0.999905554516238	-4.87459805955233
Q86UY6	NAA40	-0.0333697374610145	3.10895270633867	-0.35577450712474	0.735504975742131	0.999905554516238	-4.87508718651251
Q9H4I2	ZHX3	0.0481851011221782	3.35166090509049	0.944707390540276	0.385177144912913	0.999905554516238	-4.87518558565124
P04920-1	SLC4A2	-0.102138357978266	3.30899798834762	-1.39412407280163	0.217993797822485	0.999905554516238	-4.87523689449661
Q96F10	SAT2	-0.00207388817324634	3.39623852333116	-0.0223656680232065	0.982960357635634	0.999905554516238	-4.87579065417735
O94830	DDHD2	-0.0317492880766192	3.24956290522771	-0.21527462614083	0.837459100012963	0.999905554516238	-4.8759367096299
Q8IWB9-2	TEX2	-0.0831171067365582	3.26218423644606	-0.944391218057282	0.385324825314719	0.999905554516238	-4.87614791347722
P40425	PBX2	-0.0606111196696789	3.20896067036025	-0.647386186600296	0.543928839800719	0.999905554516238	-4.87620001515422
Q9HC21	SLC25A19	-0.0833758756331818	2.99182843249867	-0.732970198719738	0.494181607728757	0.999905554516238	-4.87652678453135
P51970	NDUFA8	-0.130029830737925	3.25024753715457	-0.998412785588045	0.360740290288879	0.999905554516238	-4.87665612577483
Q5T7M9-1	FAM69A	-0.0171693812575186	3.28791083366914	-0.193505301200346	0.853641586698266	0.999905554516238	-4.87667693798911
Q9BVM4	GGACT	0.0318827935170372	3.38432386343851	0.411915315479749	0.696264672255998	0.999905554516238	-4.87675955792925
Q9H3H1	TRIT1	-0.0315934643675591	3.2896763582427	-0.360073529734797	0.732466188865006	0.999905554516238	-4.87688143593689
Q9H6H4-1	REEP4	-0.045712656269026	3.25569509018557	-0.566817047001251	0.593617583538754	0.999905554516238	-4.8771221680007
Q9UH62	ARMCX3	-0.0724079754805744	3.22157929034198	-1.35345488323076	0.229869392315578	0.999905554516238	-4.87721107505975
Q6UB28	METAP1D	0.00463085781366314	3.23482296019365	0.0434491983627963	0.966906603127159	0.999905554516238	-4.8776124803554
Q12962	TAF10	-0.0538515542997786	3.27469172848339	-0.829491374090667	0.441979618820729	0.999905554516238	-4.87761506328479
P54709	ATP1B3	-0.0966921190071069	3.27399781038282	-1.34191867494729	0.233345048189115	0.999905554516238	-4.87789426872357
Q9Y4J8-1	DTNA	0.0192067957994151	3.29008798914828	0.203293012059905	0.846355313669973	0.999905554516238	-4.87793146484947
A0AVT1-1	UBA6	-0.038483129918589	3.36294369489378	-1.90163637893021	0.111384694156684	0.999905554516238	-4.87815116216634
Q8IW41	MAPKAPK5	-0.0306199561949689	3.17387408761853	-0.304633656780809	0.77205244489712	0.999905554516238	-4.87821546449016
P62699	YPEL5	-0.00643960302532076	3.40541942845927	-0.0474854201631028	0.963835006613644	0.999905554516238	-4.8783980871555
Q6P1X6	C8orf82	0.0720331719232105	3.296319561471	0.822822120113086	0.445451533221193	0.999905554516238	-4.87870174949043
Q9UNK0	STX8	0.0496485573954531	3.2743260270092	0.687964512331904	0.51994324085707	0.999905554516238	-4.87871743468803
Q99504	EYA3	-0.0499368257977181	3.28851104251076	-0.715569174314704	0.504036166041136	0.999905554516238	-4.87873391506117
O43189-2	PHF1	-0.0339725211592706	3.37449561558453	-0.448159760615705	0.671471137157533	0.999905554516238	-4.87884355551702
Q9NSY0-3	NRBP2	-0.0363545874498349	3.38192422490157	-0.291448534708212	0.781587511423888	0.999905554516238	-4.87898898945203
P43378	PTPN9	0.0599472402906202	3.15970833377058	0.88628358516689	0.413230488802258	0.999905554516238	-4.87908634731905
Q9NQ50	MRPL40	0.0852543525921848	3.31766698417021	1.00017265659797	0.359961226875008	0.999905554516238	-4.87918623425405
Q9H0R3	TMEM222	-0.0442048360112208	3.2894965889179	-0.371181992611296	0.724639430396571	0.999905554516238	-4.87921739190559
P13196	ALAS1	0.0320723475576418	3.07892968213819	0.357780870343149	0.734086093590322	0.999905554516238	-4.87958454072575
Q659C4-1	LARP1B	0.0590369442409937	3.34784948640006	0.768485222609687	0.474487063383574	0.999905554516238	-4.8795992108036
Q9NPA8-1	ENY2	-0.0465991806016164	3.20243540368783	-1.05432703907952	0.336653821340306	0.999905554516238	-4.87964114207291
Q17RN3-1	FAM98C	0.0321221411660593	3.34742265408366	0.351880681024609	0.738261998837635	0.999905554516238	-4.87983457108892
Q96RQ1	ERGIC2	-0.0725755317146459	3.33312881831384	-0.988533398347402	0.365139185608797	0.999905554516238	-4.87993276749009
P51688	SGSH	-0.0850699764686564	3.28698570006044	-0.662384949977394	0.534980356100228	0.999905554516238	-4.88002102274718
Q5QP82	DCAF10	-0.015371252358636	3.27752536888277	-0.187734779909521	0.857945010772772	0.999905554516238	-4.88020965420011
P30039	PBLD	0.03315885458432	3.29728183701388	0.385580640009375	0.714549992393867	0.999905554516238	-4.88029607200421
P49674	CSNK1E; LOC400927-CSNK1E	-0.0270225320153437	3.28735332490362	-0.319434898215431	0.761401778304098	0.999905554516238	-4.88034429266891
Q9NRF2	SH2B1	0.00252615319345043	3.26009726078548	0.0297245937226311	0.977355556914723	0.999905554516238	-4.88066083408263
O75665	OFD1	0.0442152221480528	3.27224473473157	1.03275937622091	0.345782381540919	0.999905554516238	-4.88087506762505
O00499-2	BIN1	0.0723024475491102	2.51571936862845	1.0184118334878	0.351967603425837	0.999905554516238	-4.88107380402151
O96007	MOCS2	-0.128085447388231	3.35273177969097	-0.813371007099259	0.45040610524458	0.999905554516238	-4.88131903902435
Q99828-2	CIB1	-0.0645608910577881	3.48854059599104	-1.0214644171623	0.350644070995441	0.999905554516238	-4.88135026576564
P25054-1	APC	0.0430802367662894	3.20355475656545	0.563670658059622	0.595612092727083	0.999905554516238	-4.88152236244752
O95619	YEATS4	-0.0438463688067675	3.31872207488204	-1.1265417047804	0.307546538356458	0.999905554516238	-4.88154844805761
P78325-1	ADAM8	-0.0909877688528232	3.28963971522683	-0.783088475437094	0.466552897735918	0.999905554516238	-4.88172407000185
Q969W3-2	FAM104A	-0.0286668229330964	3.41095137248832	-0.369562938297472	0.725777881873221	0.999905554516238	-4.8817272273202
P78560	CRADD	0.042993165985207	3.36986260616275	0.715090597613585	0.504309087590196	0.999905554516238	-4.88206471667346
Q04864	REL	-0.0318336999153652	3.07124923764987	-0.356586629197498	0.734930508590368	0.999905554516238	-4.88209199789232
Q9NZL6-2	RGL1	0.0272304274438462	3.41433322328044	0.300314519076814	0.775171086616134	0.999905554516238	-4.88299825101041
Q9NRD5	PICK1	0.0179880205339748	3.32455484808393	0.205566239876419	0.844665462526194	0.999905554516238	-4.88322271706827
Q8N8S7	ENAH	0.0894924751148617	2.19825560909002	1.2065216562011	0.277855424520188	0.999905554516238	-4.88342106411753
Q8NA19-1	L3MBTL4	-0.0140988413045377	3.3653871958664	-0.111268369602454	0.915426807547713	0.999905554516238	-4.88342618449181
Q8N183	NDUFAF2	0.0694963751327438	3.31055042329171	1.26332455378264	0.25832863200956	0.999905554516238	-4.883627794069
Q96B36-3	AKT1S1	0.0100065265162206	3.34086903834208	0.12133015580074	0.907821491142557	0.999905554516238	-4.8836299194588
Q8N128-2	FAM177A1	-0.0233471109423158	3.23922765575558	-0.249351340261443	0.812309353246903	0.999905554516238	-4.88382262139033
O14874	BCKDK	0.145739885291869	3.38145690938015	0.6275363014094	0.555919146174281	0.999905554516238	-4.88384244475233
Q53FT3	C11orf73; HIKESHI	-0.0907147963802193	3.33915980129092	-0.74196538304894	0.489140161331657	0.999905554516238	-4.88403764045181
Q9NZL9	MAT2B	0.0307038516738407	3.37331310969398	0.368415404492726	0.726585257015609	0.999905554516238	-4.88428000441928
Q12929	EPS8	0.0541090695105144	3.05423610658856	0.735548830974949	0.492732704625708	0.999905554516238	-4.88460518601454
Q99719-1	SEPT5	-0.0060860207218658	2.79160947243009	-0.0620153210049847	0.952783836190552	0.999905554516238	-4.88472647640863
Q9BQE9-1	BCL7B	-0.048381358072697	3.32873046321217	-0.802890720950276	0.455947414438544	0.999905554516238	-4.88480048980514
O75414	NME6	0.048895885643771	3.26864323574661	0.656986184458962	0.538190216792606	0.999905554516238	-4.88488144066479
Q86UB9	TMEM135	-0.0408446648212345	3.27013844458531	-0.382460981171022	0.716730601984702	0.999905554516238	-4.88492314037542
Q15111-1	PLCL1	0.00244789114134533	3.38623152004812	0.0218380172878384	0.983362280141139	0.999905554516238	-4.88496098181592
Q6NUN9-2	ZNF746	-0.0380473401096341	3.28554525977214	-0.310693291970455	0.767685141090635	0.999905554516238	-4.88500893002662
Q9UBZ4	APEX2	0.0394636568906451	3.29415991355067	0.579225197944953	0.585790867480542	0.999905554516238	-4.88504277909119
Q8TBE9	NANP	-0.0545601042980121	3.24576327357485	-0.727351216518409	0.497349080029195	0.999905554516238	-4.88522852152492
Q6NXG1-1	ESRP1	-0.00518868837141987	3.36068123946255	-0.0551470139459164	0.958006440722805	0.999905554516238	-4.88573872649968
Q9ULS5	TMCC3	-0.0787775406384908	3.30288532147283	-0.952176927311194	0.381701255223977	0.999905554516238	-4.88578494969625
Q6PFW1-1	PPIP5K1	0.050610396968134	3.36212683408196	0.724151627505134	0.499158977905015	0.999905554516238	-4.88601768936864
Q9NPR2-1	SEMA4B	-0.0260292305496179	3.34084423364696	-0.244231485619314	0.8160728271773	0.999905554516238	-4.88603251583444
Q7LG56-6	RRM2B	0.0450931397015341	3.27857856737828	0.489289308031476	0.643889463878858	0.999905554516238	-4.88605367718037
Q8TAP8	PPP1R35	0.00725904831435296	3.31292091667591	0.0871492351415619	0.933696859757529	0.999905554516238	-4.88606427132564
O15121	DEGS1	-0.075046414458504	3.13098689755158	-0.620010849621974	0.560508442889192	0.999905554516238	-4.88610509582707
Q86UU0	BCL9L	-0.0235184737487877	3.33326591959917	-0.252621932520007	0.809908163118592	0.999905554516238	-4.88612179738632
Q6P3X3	TTC27	-0.0624228798328555	3.23348768893543	-1.31009636711296	0.243183509960916	0.999905554516238	-4.88614169491676
Q9BPX6-3	MICU1	-0.052424589470328	3.22714884486376	-0.651742738837413	0.54131971678863	0.999905554516238	-4.88635900467343
Q86WP2-2	GPBP1	-0.0621010715632693	3.28434912549672	-0.966891116523962	0.374927206400087	0.999905554516238	-4.88641183923365
P52298-1	NCBP2	-0.0524825061251653	3.35600549810162	-0.670486946915732	0.530186853653045	0.999905554516238	-4.88642888291688
Q38SD2	LRRK1	0.0460001989296981	3.34000722988425	1.18281432094038	0.286383885603628	0.999905554516238	-4.88680058105771
Q8TCU4-1	ALMS1	0.0768768501168553	3.29078751730016	0.931792647035291	0.391246006166756	0.999905554516238	-4.88695608170945
Q5H8A4-1	PIGG	-0.0749007481461103	3.1900994104275	-0.750801701512647	0.484222864210148	0.999905554516238	-4.88735570445317
P28907	CD38	-0.0419867912170972	3.38697284914722	-1.40435716398857	0.215096622934829	0.999905554516238	-4.8874075034609
Q5TCQ9-1	MAGI3	0.0215734283425156	3.07788149358999	0.256240407913064	0.807254273587602	0.999905554516238	-4.88762553553764
Q93073-1	SECISBP2L	-0.0382096394347104	3.4326714899842	-1.26650013177987	0.257274063880736	0.999905554516238	-4.8877181611397
O60513	B4GALT4	-0.0276402926184196	3.21188436798267	-0.264994255163942	0.800845944591852	0.999905554516238	-4.88773677669093
O15516	CLOCK	-0.0472950567843368	3.26323071353511	-0.546888003316346	0.606317354055395	0.999905554516238	-4.88835772683908
Q9NVF7-1	FBXO28	0.0573885561248191	3.32171880492653	0.866758233935441	0.42294976314542	0.999905554516238	-4.88866037993959
O15269	SPTLC1	-0.0604136017021402	3.13441810813947	-0.963004212485897	0.376707231478085	0.999905554516238	-4.88891608287048
Q15528-1	MED22	-0.0479954306383618	3.33496158372802	-0.595493646722982	0.575624014535977	0.999905554516238	-4.888953391105
Q32MZ4-2	LRRFIP1	-0.0307059366710398	3.38415576622851	-1.81080747000021	0.125659595550473	0.999905554516238	-4.88910078584495
Q6NUK4	REEP3	0.0113028626082809	3.31953310438783	0.136875553726065	0.896093203426847	0.999905554516238	-4.88911265029426
Q14181	POLA2	-0.0419088356107259	3.25355632905771	-1.24409675989506	0.264797059736794	0.999905554516238	-4.88920633503429
O00214-2	LGALS8	-0.0707783273127796	3.36358873700631	-0.52144980150059	0.622754625925098	0.999905554516238	-4.88921228909396
Q15819	UBE2V2	-0.072403714502724	3.34116260054167	-1.26876767090195	0.256523411327203	0.999905554516238	-4.8897341740071
O43766-1	LIAS	0.0451252662194589	3.28283889817603	0.460694922655633	0.663001085695356	0.999905554516238	-4.88980173123815
Q99487	PAFAH2	0.00468366780948514	3.32734119531533	0.0472835745742458	0.963988596616533	0.999905554516238	-4.88996559041172
Q9BYD3	MRPL4	0.0494100967270786	3.3426808085324	1.13227737995972	0.305329439896343	0.999905554516238	-4.89012070468153
Q9P2M4-1	TBC1D14	0.051381931783144	3.37237121466444	0.683565643857619	0.522508906859175	0.999905554516238	-4.89050390211853
Q9ULG6-5	CCPG1	0.0193075769716573	3.11929750775001	0.120016354081821	0.908813939687858	0.999905554516238	-4.89094201159474
O75787	ATP6AP2	-0.0750064128856177	2.84634962006329	-0.645293996190861	0.545184727598715	0.999905554516238	-4.89096826031078
Q96DU3-1	SLAMF6	-0.0603746854715989	3.32395066711747	-0.770300061124959	0.473495820451108	0.999905554516238	-4.8911194276128
Q9H0J9	PARP12	0.0113235176740302	3.44112657578004	0.134785404650305	0.897668483098785	0.999905554516238	-4.89125858803892
Q13772-4	NCOA4	-0.0360109034376504	3.26115447720862	-0.497459853634291	0.638483327917554	0.999905554516238	-4.89230611260843
Q9C086	INO80B	0.0432612339529856	3.38586909714997	0.691787643888371	0.517720237567495	0.999905554516238	-4.89257000933737
Q9BRQ0	PYGO2	-0.0753983281700115	3.285197245122	-0.674894103106728	0.527591305111978	0.999905554516238	-4.89259247172182
Q8TB52	FBXO30	0.0758061728725112	3.25400956446039	0.698428683517236	0.513873931881169	0.999905554516238	-4.8928055845919
Q86WW8	COA5	-0.0432678991199889	3.32764810663265	-0.950837680247173	0.38232262288314	0.999905554516238	-4.89286767331368
Q6Y288	B3GALTL; B3GLCT	-0.0218687002243029	3.26054936218269	-0.223276789065487	0.831532495887068	0.999905554516238	-4.89294476448417
Q9NQ86	TRIM36	-0.0289509751144882	3.34091008845158	-0.264099826589071	0.801499930551533	0.999905554516238	-4.89321875669937
Q9Y2K6	USP20	-0.000997214302518057	3.36157641797573	-0.010386787343381	0.992086046361404	0.999905554516238	-4.89330228922579
P25942-1	CD40	-0.0623231019222418	3.37041203019712	-0.540878939645245	0.610177461376266	0.999905554516238	-4.89338830179795
Q9H4L4	SENP3	-0.0646370594615443	3.24691685356599	-1.30114134793072	0.246019475985398	0.999905554516238	-4.8935007167162
Q9Y4D1	DAAM1	-0.0290765055310517	3.34968105711765	-0.362684825155628	0.730623033407179	0.999905554516238	-4.89364190136286
Q92990	GLMN	-0.0503377111758947	3.26659310583605	-1.20208571683244	0.279434014743133	0.999905554516238	-4.89372784390743
P20337	RAB3B	-0.0648166054564842	3.38217798562647	-0.776930715096213	0.469886812375195	0.999905554516238	-4.89415575069981
Q14651	PLS1	-0.04721971369271	2.69116676618061	-1.0418554367742	0.341907740400004	0.999905554516238	-4.89420643969016
Q9HAP2-1	MLXIP	-0.0267967455192104	3.12482914901109	-0.268958397216297	0.797949644125337	0.999905554516238	-4.89443332615679
O94923	GLCE	-0.0539180405802277	3.19513780024732	-0.519223245261815	0.624205250782602	0.999905554516238	-4.89445380729989
Q8NBK3	SUMF1	-0.0546158670968028	3.38565552077609	-0.777866448183619	0.469379091845891	0.999905554516238	-4.89475718474462
Q6PL24	TMED8	-0.044052956912456	3.31983865630441	-0.809243948615342	0.452582308067203	0.999905554516238	-4.89515051518838
Q86X10-1	RALGAPB	0.0488212949532123	3.28295770131093	1.15426114056746	0.296958666499046	0.999905554516238	-4.89633294960841
O43278	SPINT1	-0.0511903836686616	3.33811573708614	-1.09760550263586	0.318942811433334	0.999905554516238	-4.8964021085182
Q9Y664	KPTN	0.00207724445759114	3.32029508933437	0.022820276344856	0.98261407755473	0.999905554516238	-4.89656689245294
Q7Z2W4-3	ZC3HAV1	-0.030285605898105	3.3245488395012	-0.332650273002799	0.751941567334445	0.999905554516238	-4.8966796474423
P28324	ELK4	0.00758815787271843	3.46047580654017	0.0848005137301029	0.935478629363353	0.999905554516238	-4.89673248933794
Q9UM13	ANAPC10	0.0618898317824033	3.25954965749962	0.652273247841785	0.541002551629459	0.999905554516238	-4.89676742142448
O60294	LCMT2	-0.0200233583930815	3.24150849723132	-0.19508525620208	0.852464298534776	0.999905554516238	-4.89711555342946
Q6AI08	HEATR6	0.00214029111219563	2.96387367043145	0.0207898890367637	0.984160677315129	0.999905554516238	-4.89720888584623
O43739	CYTH3	0.0251877075700779	3.30083138687465	0.281958571245056	0.78847697612434	0.999905554516238	-4.89722276771969
O43181	NDUFS4	0.0641916505271121	3.26222276966947	0.949325145665074	0.383025356965235	0.999905554516238	-4.89745844904431
Q9ULJ7-1	ANKRD50	-0.0572288987312028	3.25101048026253	-0.762605437493568	0.477708680261514	0.999905554516238	-4.89749186978989
P0DMM9-3	SULT1A4; LOC105369243; SULT1A3	0.0437838773517498	3.39635178578244	0.51730328234521	0.625457648245123	0.999905554516238	-4.89752010087095
O15228	GNPAT	-0.0915040568137694	3.24588275973192	-1.26513203602976	0.257727915893591	0.999905554516238	-4.89792062737144
Q9BQ61	C19orf43; TRIR	-0.0481182957288823	3.35503421337893	-1.2685402400747	0.256598611776503	0.999905554516238	-4.89874870739783
Q9NPA5-1	ZFP64	0.0141238013806741	3.3873719147871	0.145931405853909	0.889274342479816	0.999905554516238	-4.89935202676378
Q15390	MTFR1	-0.0121082867520558	3.25684582623899	-0.13465781452423	0.897764660829505	0.999905554516238	-4.89938240487916
Q92508	PIEZO1	-0.101283821820218	3.29881784083196	-1.0848313841865	0.324086808103619	0.999905554516238	-4.89958008637103
Q93075	TATDN2	0.0349233363536075	3.29693323035747	0.499037131428191	0.63744255711587	0.999905554516238	-4.89967812601764
Q96ME7	ZNF512	-0.0783599998400476	3.13235809521257	-0.634516761810211	0.55168355150776	0.999905554516238	-4.89977651238813
Q5TCX8	KIAA1804; MAP3K21	-0.0215935029693394	3.2655772105268	-0.267176857525446	0.799250837413796	0.999905554516238	-4.89982418787931
Q9UH92	MLX	-0.0372255836599997	3.25867669409613	-0.295384112085592	0.778736862221913	0.999905554516238	-4.90017630460115
Q96AA3	RFT1	-0.0405565735056281	3.28626881377173	-0.438932633299485	0.677740856414606	0.999905554516238	-4.90026491634045
P0C2W1	FBXO45	-0.010697595376837	3.39254596440941	-0.130295538579219	0.901054116908283	0.999905554516238	-4.90034068544088
Q96MH2	HEXIM2	-0.00815850837077652	3.34999765257122	-0.102271350533186	0.922235867731749	0.999905554516238	-4.90045179403034
Q03519-1	TAP2	-0.116893425776472	3.25423813565263	-1.17516254731375	0.289185058106203	0.999905554516238	-4.9006939322995
Q86U28	ISCA2	0.0367546278110035	3.32419369918307	0.516324520490936	0.626096638594945	0.999905554516238	-4.90089238056533
Q969F1	GTF3C6	0.0557038397031645	3.282908496063	0.788765929446165	0.463494151128319	0.999905554516238	-4.90092362511044
O75843	AP1G2	0.0434541156040789	3.40195790277986	1.14331368312439	0.301102046412096	0.999905554516238	-4.90145841091107
Q9H4H8	FAM83D	0.0120149298570545	3.03879282235153	0.128871977033125	0.902128062018282	0.999905554516238	-4.90166143922493
Q9Y6C9	MTCH2	-0.0674370369936086	3.15021378240891	-1.35952653918024	0.228059293681487	0.999905554516238	-4.90170149702505
Q9NVH0	EXD2	-0.0633656900698223	3.20535384081564	-1.1362916759874	0.303785912856966	0.999905554516238	-4.90189105213945
Q6P1R3-1	MSANTD2	0.0427721692192598	3.36415350560259	0.571353591915591	0.590748849929658	0.999905554516238	-4.9019553557539
P49590	HARS2	0.0438183912571394	3.21053614530396	0.659019755066684	0.536979676197818	0.999905554516238	-4.90210317707911
Q9BVS5	TRMT61B	0.0564595157293687	3.27896048597786	0.628481890728813	0.555344177402988	0.999905554516238	-4.902465766368
Q9NUL5	C19orf66	-0.0435472830418297	3.36530828476735	-0.307422977543034	0.770040946099851	0.999905554516238	-4.90262174546803
Q96J42-1	TXNDC15	-0.0692460625392791	3.26023057707967	-0.823430176455513	0.445134154233493	0.999905554516238	-4.90269938002572
Q8TAD4-1	SLC30A5	-0.0599943015553529	3.29803897558282	-0.596650761551706	0.574905017385671	0.999905554516238	-4.90304178420262
Q15468-2	STIL	0.0250450037239662	3.30487146170658	0.293335315529243	0.780220383845776	0.999905554516238	-4.90337206197234
Q8IZT6-1	ASPM	0.0410314983627188	3.34468566709205	1.34567048726823	0.232209432517791	0.999905554516238	-4.90348281247038
Q9HAU8	RNPEPL1	-0.00933648120758375	3.31901470792337	-0.0659572735442991	0.949787578970558	0.999905554516238	-4.90359573226789
Q9UM11-2	FZR1	-0.00378973519123483	3.33232617390428	-0.0402866772371578	0.969313755595985	0.999905554516238	-4.90388935350817
Q9BW66-3	CINP	-0.0564655717443944	3.42478372636842	-0.753191677044192	0.482898864295446	0.999905554516238	-4.90419281589508
Q9NRR4-1	DROSHA	0.032226653119835	3.30792340459083	0.436554310016165	0.679361637018002	0.999905554516238	-4.9043545985015
Q9NWR8	CCDC109B; MCUB	0.0363050107340879	3.20109415248638	0.427931794761593	0.685253821077745	0.999905554516238	-4.90472277809259
O60268-1	KIAA0513	0.0263800985507785	3.40891289278757	0.314024679918221	0.765288205712616	0.999905554516238	-4.90484346127211
Q9NP80-1	PNPLA8	-0.0306011925854769	3.29182863380025	-0.345365160404908	0.742885090967195	0.999905554516238	-4.9048880526209
Q9NVH6-8	TMLHE	0.0153425654910887	3.13709323558807	0.170993277308001	0.870460670239258	0.999905554516238	-4.90489949155277
Q99698-1	LYST	0.061285087080411	3.33183739627045	0.652073225341542	0.541122121056535	0.999905554516238	-4.90502065320694
Q6P2H3-1	CEP85	-0.040397224405689	3.33425607175886	-1.18518747713135	0.285519949907219	0.999905554516238	-4.90587330668876
Q15714-1	TSC22D1	0.0107302382947343	3.04025824951041	0.124440990685893	0.905472309218862	0.999905554516238	-4.90600759808556
Q9HBF4-1	ZFYVE1	-0.0348449464905516	3.37080336849807	-0.496834696297998	0.638896095932052	0.999905554516238	-4.90623606998823
Q9NV70-1	EXOC1	-0.0781588662244553	3.31255261233151	-1.44457492481995	0.204055095234144	0.999905554516238	-4.90628410363415
Q9H5Q4	TFB2M	0.104584031442645	3.26092127390953	1.02627726602623	0.348565638302743	0.999905554516238	-4.90650806072921
P55197	MLLT10	-0.00532935163889494	3.24280452807404	-0.0523707444460895	0.960118174985766	0.999905554516238	-4.90676987374823
Q04917	YWHAH	-0.0413779417413408	3.35606425511263	-1.65764317579424	0.154004260624275	0.999905554516238	-4.90690335566943
Q9HCJ1	ANKH	-0.0659027702253898	3.33981250629091	-0.765578778156536	0.476077607247721	0.999905554516238	-4.90694821078945
O96008	TOMM40	-0.121290453102518	2.96492689363365	-1.19953727870405	0.280344478385337	0.999905554516238	-4.9070013455735
Q96P50	ACAP3	-0.000594200066753242	3.27680848448403	-0.00565880023764578	0.995688353630405	0.999905554516238	-4.90740931599783
Q8TF40-1	FNIP1	0.0415513807001939	3.32007966101656	0.676113600719624	0.526874582124374	0.999905554516238	-4.90748241761197
Q147X3	NAA30	0.00612624280215353	3.32998420715294	0.077329937290602	0.941148640536115	0.999905554516238	-4.90792634846125
Q9HB20	PLEKHA3	-0.0139681374611192	3.42517854306075	-0.157580442950463	0.880518592734102	0.999905554516238	-4.90801104544556
Q7Z3S9-3	NOTCH2NL; LOC100996717; LOC100996763; LOC101060226; NBPF19	0.0200291361367675	3.3770674470277	0.231464215881959	0.825481542816424	0.999905554516238	-4.90801353091953
P50219	MNX1	-0.0331672485056026	3.26753561995647	-0.382584886749037	0.716643935826431	0.999905554516238	-4.90810475052879
Q96HA8	WDYHV1	0.0130016984077012	3.34391623036079	0.123581313860663	0.906121397493381	0.999905554516238	-4.90820378437265
O15211	RGL2	-0.0303424579377652	3.2990311452575	-0.347381661857624	0.741452981430397	0.999905554516238	-4.90826324280196
Q66LE6	PPP2R2D	-0.0147161632531544	3.33494533691961	-0.141102742159558	0.892908939414917	0.999905554516238	-4.90834637302241
Q9H9A6	LRRC40	-0.0430407351678336	3.204012134819	-1.33189742476427	0.236403335617944	0.999905554516238	-4.90838763226313
P61619	SEC61A1	-0.160554150351614	3.19089214729109	-1.05215867076723	0.337562436463411	0.999905554516238	-4.90845367811397
Q7Z4L5	TTC21B	0.00352195267924748	3.24328960110194	0.0354756586885057	0.972976349176715	0.999905554516238	-4.90912254290655
Q9Y3D8	AK6; TAF9	-0.083195481770679	3.21728389628529	-0.821356063412545	0.446217438985422	0.999905554516238	-4.90929350344114
P82914	MRPS15	-0.0424799384179472	3.19333890039187	-1.19778480193734	0.280972087386304	0.999905554516238	-4.90945392376329
Q7Z699	SPRED1	-0.026449516751677	3.27302331193618	-0.325708812981217	0.756904697267912	0.999905554516238	-4.90947982400697
Q9HA47-4	UCK1	0.0395234242102346	3.31675171193672	0.509096320069124	0.630826880327638	0.999905554516238	-4.90953272536005
P55198	MLLT6	-0.0548506416678623	3.36906941666053	-0.914505700143874	0.399486896190308	0.999905554516238	-4.90962561355007
Q96FC9-2	DDX11	0.0247757215066226	3.2625930641374	0.278846429154365	0.790741037180324	0.999905554516238	-4.90968441197917
Q9H4B7	TUBB1	-0.0337238178763991	3.49590880021075	-0.407179491439477	0.69953657137939	0.999905554516238	-4.9098686899047
O94880	PHF14	0.0346603765663693	3.25457168161147	0.462922969333058	0.661501377221747	0.999905554516238	-4.90991516234128
Q96G28	CCDC104; CFAP36	-0.0805431606322737	2.98474611565218	-0.722709569432524	0.499976184007771	0.999905554516238	-4.90995205376092
Q5UCC4-1	EMC10	-0.0717062349523315	3.14809537727448	-0.749755318532569	0.484803343434188	0.999905554516238	-4.91014094031188
P62277	RPS13	-0.0912030330452502	3.13579199049542	-1.2255839101601	0.271161111952008	0.999905554516238	-4.91021971589363
P30047	GCHFR	0.024601901959062	3.36979383601042	0.291228259985211	0.781747175847239	0.999905554516238	-4.91024684491557
O95644-1	NFATC1	0.0176854200917626	3.31695071681978	0.227242327215602	0.828600096494432	0.999905554516238	-4.9102520050786
Q9BTX1	NDC1; TMEM48	-0.118661519328328	3.0934112711826	-1.06401083554627	0.332620867857671	0.999905554516238	-4.91033438732862
Q16594	TAF9	-0.0227899565383805	3.37390535276524	-0.27060729846081	0.796745976324633	0.999905554516238	-4.91051410006594
O95273-1	CCNDBP1	-0.040281078238828	3.32895796246621	-0.530711706699294	0.616740835262474	0.999905554516238	-4.91053644492234
Q96Q83-1	ALKBH3	-0.036892577714894	3.31845487883691	-0.497748616475743	0.638292717716678	0.999905554516238	-4.91085025217572
Q9NXJ5	PGPEP1	-0.0313121325430662	3.3844391546672	-0.420439354084234	0.690394065508108	0.999905554516238	-4.91105870037853
Q2TAK8-1	MUM1	-0.0276668092847931	3.31944819212143	-0.313103637573855	0.765950605502405	0.999905554516238	-4.911400925523
Q15669	RHOH	-0.0334489887439707	3.37382602535819	-0.279695377858073	0.79012320429296	0.999905554516238	-4.91144953257167
P62253	UBE2G1	-0.0526817601940804	3.30333223011124	-1.28287050848406	0.251898844858048	0.999905554516238	-4.91156810278566
P17098	ZNF8	0.0266066628478093	3.24771047902984	0.369608732700939	0.725745670319226	0.999905554516238	-4.91159819932629
Q96NW4	ANKRD27	-0.0293924381477852	3.28380339411161	-0.3229636857225	0.758871074929825	0.999905554516238	-4.91161061394548
Q96DA6	DNAJC19	0.213732630658112	3.36194329751526	1.24197833343613	0.265518497664286	0.999905554516238	-4.91198266389446
Q9BXJ8-1	TMEM120A	-0.0376809979167242	3.17524586215123	-0.273969131283543	0.794293848719886	0.999905554516238	-4.91207399570985
Q9NWL6	ASNSD1; ASDURF	-0.0119175962916101	3.23049941546893	-0.138784064722292	0.894655283379461	0.999905554516238	-4.91222431263657
Q8WXX7-1	AUTS2	0.0269995830561555	3.33481459036159	0.293734705629219	0.779931105951364	0.999905554516238	-4.9122405041706
Q3KRA9-2	ALKBH6	-0.0377170331579632	3.31287675780492	-0.469658325392617	0.656978518820029	0.999905554516238	-4.91233340883218
P98155-1	VLDLR	0.023176480608426	3.30098901787584	0.197959026438844	0.85032403357303	0.999905554516238	-4.91267344654359
Q969E8	TSR2	0.0228700516119859	3.23372422774748	0.282349403139006	0.788192812205705	0.999905554516238	-4.91276110226026
Q9Y383	LUC7L2	-0.0410541709196267	3.3040172790404	-1.3381542288852	0.234489606101397	0.999905554516238	-4.91284881739796
Q92546	RGP1	0.0291230121275262	3.37228779727857	0.347980198046961	0.741028127457532	0.999905554516238	-4.91286786212308
Q9Y2Y9	KLF13	0.0425566494132966	3.31926837208638	0.688376502304194	0.519703377641042	0.999905554516238	-4.91303691198094
Q16540	MRPL23	0.0390397575245466	3.31377053282735	0.332045004051218	0.752373807690115	0.999905554516238	-4.91380687683675
P27449	ATP6V0C	-0.0811624349443386	3.19180495765295	-0.410603828726947	0.697170024919132	0.999905554516238	-4.91399004338522
P23497-4	SP100	-0.037740792515654	3.43306208919113	-0.257488198275559	0.806339775772085	0.999905554516238	-4.91407875680204
Q9UFF9	CNOT8	-0.00438468224444265	3.01713975342121	-0.0555175120412183	0.957724654582618	0.999905554516238	-4.91414088440118
Q96DA2	RAB39B	-0.0751057957570825	3.22711770373547	-0.620634111300071	0.560127451054065	0.999905554516238	-4.91414458035614
Q86VP3-2	PACS2	-0.0093420760098206	3.33670245654492	-0.103854959461564	0.921036815994506	0.999905554516238	-4.91434675496969
A6NHZ5	LRRC14B	0.00220813561282965	3.40383414826168	0.0264473699933658	0.979851440622056	0.999905554516238	-4.91440358816566
Q9ULG1	INO80	0.0642592456235453	3.42082107640975	0.810917435284682	0.451698948694779	0.999905554516238	-4.91445165588547
P49760-1	CLK2	-0.0316473582578202	3.26635760727148	-0.330908821479432	0.753185461492537	0.999905554516238	-4.91446815104749
Q9BW62	KATNAL1	0.00690365015847086	3.08967898502433	0.0757055266702674	0.942382060562448	0.999905554516238	-4.91465029329309
Q8NCE0-1	TSEN2	0.030833215497125	3.3013993588044	0.35870678325405	0.733431693479992	0.999905554516238	-4.91469874762791
Q96NE9-1	FRMD6	0.0389855416794632	3.32684440004824	0.454437122408361	0.667222617014715	0.999905554516238	-4.9147231050946
Q9Y248	GINS2	0.19945717581809	3.25594944137948	0.665602007350522	0.533073608933159	0.999905554516238	-4.91478308806943
Q9BZ95	WHSC1L1; NSD3	0.0595640977785937	3.38655618502503	1.1414234103591	0.301822505659251	0.999905554516238	-4.91482397599226
Q8N0U8	VKORC1L1	-0.0283462747276321	3.26794016816558	-0.351393428834104	0.738607306900481	0.999905554516238	-4.91501933041462
Q5JPI9	METTL10; EEF1AKMT2	-0.033910870016952	3.3774383174074	-0.353030206461097	0.737447619971624	0.999905554516238	-4.91502553257677
Q15649	ZNHIT3	-0.0277346546185489	3.23384216735032	-0.3633493491813	0.730154307892827	0.999905554516238	-4.91511334023392
Q9NRG4	SMYD2	0.01853451713201	3.27702676092859	0.234637491416697	0.823139911086361	0.999905554516238	-4.91562492769999
O00472	ELL2	0.0395731526933023	3.3097994666681	0.435047493975176	0.680389500660709	0.999905554516238	-4.91587256048841
Q06587	RING1	-0.0471181771865197	3.32109412822056	-0.887237392876796	0.412760125584117	0.999905554516238	-4.91594404585858
Q9ULL5-3	PRR12	0.0715088466904573	3.36701221650318	1.28128007085543	0.252416591654347	0.999905554516238	-4.91597351033605
Q99519	NEU1	0.0427283650986984	3.31180414715428	1.02919253225928	0.347311618517095	0.999905554516238	-4.91619144219792
P0DOX5		-0.0423565503625039	3.44160529734061	-0.887478590210464	0.412641246102227	0.999905554516238	-4.91619737014584
Q96QT4	TRPM7	-0.0200600691651814	3.25663475005241	-0.192248489760485	0.854578390370479	0.999905554516238	-4.91622225449767
O15014	ZNF609	-0.0544340798147085	3.19316320993818	-0.898965954284591	0.407009908454624	0.999905554516238	-4.91632289297793
Q8N5P1	ZC3H8	0.0393288502794074	3.18136714008065	0.663950735465189	0.534051758858491	0.999905554516238	-4.91664071231941
P25774-1	CTSS	0.0406210331661956	3.45563094842013	1.10242908628096	0.31701848456752	0.999905554516238	-4.9167362072049
Q9UL40-2	ZNF346	0.00353648905328463	3.18215676083362	0.033485135665814	0.974491942357462	0.999905554516238	-4.9167379882673
Q6NTE8	C5orf45; MRNIP	-0.0461926080597246	3.34010460870332	-0.87209373295839	0.420276734865614	0.999905554516238	-4.9171815089332
Q86TP1-1	PRUNE; PRUNE1	-0.0498080803993857	3.29449560563199	-1.16605099592841	0.292551776102829	0.999905554516238	-4.91732271524688
Q3KRA6	C2orf76	-0.0532175743559198	3.35999030156149	-0.697962477467807	0.514143314777828	0.999905554516238	-4.91756763788725
Q5JU69-1	TOR2A	0.0449837550994095	3.40074705142036	0.749463288911639	0.484965433684603	0.999905554516238	-4.91764554438537
Q13308-6	PTK7	0.0629784570609587	2.87042544548704	0.734473097008897	0.493336787454435	0.999905554516238	-4.91811886033962
Q96HD1-2	CRELD1	-0.0752688889447975	3.16773888097979	-0.939623567123893	0.387557178525748	0.999905554516238	-4.91855603533691
Q96JA3	PLEKHA8	-0.0604310416800067	3.33320229587817	-0.851567928713494	0.430630555065764	0.999905554516238	-4.91856496658592
P50749	RASSF2	0.0486153091950777	3.41570191894705	0.898272936926944	0.407347948550638	0.999905554516238	-4.91865596696874
Q6P444	FAM54A; MTFR2	-0.075270350205522	3.27268167085589	-0.968436664332614	0.374221290666947	0.999905554516238	-4.91882205214072
P40189-1	IL6ST	-0.0733514242439239	3.255602714974	-0.792692435856696	0.461387227768555	0.999905554516238	-4.91884862030856
P19388	POLR2E	-0.0766042681743241	3.27507482176741	-1.19684801889483	0.281308080896568	0.999905554516238	-4.91896128316657
O95470	SGPL1	-0.0776699018959486	3.18607377290838	-0.558861375510573	0.598668372877427	0.999905554516238	-4.91909223274254
Q5TAX3	ZCCHC11	0.041289309474542	3.2398565462477	1.29027787482091	0.249500081187642	0.999905554516238	-4.91918373857972
Q9NUP7-1	TRMT13	-0.0548675438031586	3.11513255039748	-0.970700499368461	0.373189227799522	0.999905554516238	-4.91960306496228
P15289-1	ARSA	-0.0435680836749821	3.34466460166293	-0.676759348855789	0.526495324478953	0.999905554516238	-4.9197511599546
Q8N4L2	TMEM55A; PIP4P2	0.0072843973212567	3.26178341440088	0.0738220966386243	0.943812379450495	0.999905554516238	-4.91984225213042
Q96MT8-2	CEP63	-0.0814097446680726	3.28175233375228	-0.940901678090646	0.386957728386309	0.999905554516238	-4.92001994541617
Q96FA3	PELI1	-0.054070487229773	3.33233043807199	-0.691468298857399	0.517905679848856	0.999905554516238	-4.9202982309748
Q9UM19	HPCAL4	-0.0712223118736344	3.29783143109864	-0.652274433928402	0.541001842661853	0.999905554516238	-4.92048680857699
Q8N5Y2-1	MSL3	0.0307560663218528	3.33425185395615	0.341523664295042	0.745616500184987	0.999905554516238	-4.92053682684333
Q9H8W3	FAM204A	-0.109890175977552	3.25343453593775	-0.97199855577968	0.372598486376884	0.999905554516238	-4.92091285301097
Q9NX01	TXNL4B	-0.0447678619730579	3.34155136881337	-0.55972559169396	0.598118486235429	0.999905554516238	-4.92104554914387
P52429	DGKE	-0.0174005109265813	3.26790311670326	-0.118507062816885	0.909954289687956	0.999905554516238	-4.92111298933563
Q86YQ8	CPNE8	-0.0339069876921905	3.21140514287846	-0.416836925203135	0.692872181709402	0.999905554516238	-4.92116948149432
Q9H0N5	PCBD2	-0.0439175141527011	3.39660398421489	-0.782156598221972	0.467056336142306	0.999905554516238	-4.92146355269668
Q96N66-1	MBOAT7	-0.0605835991420366	3.21106264922667	-0.522942372997456	0.621783262974996	0.999905554516238	-4.92158282138791
Q9BUB4	ADAT1	-0.0240871619767306	3.19271334167845	-0.322382285544372	0.759287801768816	0.999905554516238	-4.92166770028961
Q15906-2	VPS72	-0.0372876528512261	3.30251146056908	-0.33527622262261	0.750067471993666	0.999905554516238	-4.92199609611191
Q8TF74	WIPF2	-0.0237363846652263	2.95788999709904	-0.305117896977516	0.771703095138745	0.999905554516238	-4.92205895360709
Q9NUQ3-1	TXLNG	-0.0445240968011386	3.26112468682653	-1.32270768435805	0.239240052108247	0.999905554516238	-4.92213691910415
O60307	MAST3	0.0558480183298271	3.33145116579851	0.819361335829343	0.447261097509462	0.999905554516238	-4.92223451082823
P28749-1	RBL1	-0.0476905690057694	3.28647985541356	-0.713940681311641	0.504965272509612	0.999905554516238	-4.92231309943339
Q9BRQ6	CHCHD6	-0.0463886680387777	3.20565602601652	-0.581549689645335	0.584331575905672	0.999905554516238	-4.92243648343679
O60825-1	PFKFB2	-0.00496086530465685	3.36582535796026	-0.0500506967736462	0.96188316973854	0.999905554516238	-4.92245279131444
P09234	SNRPC	-0.0447477017704736	3.27549692482639	-1.12830944348529	0.306861759086909	0.999905554516238	-4.92253144153087
Q6XZF7	DNMBP	-0.0509216762287076	3.34708394791481	-1.07755580607041	0.327047790915332	0.999905554516238	-4.92291896830618
Q16740	CLPP	0.0805554063377263	3.35972730365818	1.39984240151075	0.216370388001504	0.999905554516238	-4.92301914991816
Q14451-3	GRB7	-0.0388032414904688	3.34609807564201	-0.372833386278959	0.723479053634399	0.999905554516238	-4.92334233889904
Q9BXI6-2	TBC1D10A	-0.0469705982950582	3.26632884860991	-0.411962714988375	0.696231961682829	0.999905554516238	-4.92344341127433
Q96G46	DUS3L	-0.0376164418825313	3.35363921349049	-1.43006222466937	0.207976742800359	0.999905554516238	-4.92353425852887
P27701	CD82	-0.0937773350828016	3.33071858688735	-1.00898930703369	0.356078862291139	0.999905554516238	-4.92363482986981
Q9Y6M9	NDUFB9	0.051350999420589	3.14913621092008	0.613945345775874	0.564224705331259	0.999905554516238	-4.92367443031126
Q9BUF5	TUBB6	0.0877264457899066	1.99277122173813	0.815008902253408	0.449544575272497	0.999905554516238	-4.92443007050179
Q8N9N8	EIF1AD	-0.0717232067309983	3.39663115857057	-0.998716763027724	0.360605626999529	0.999905554516238	-4.92449554259387
P17568	NDUFB7	-0.0519872070406654	3.18677778817966	-0.538147534657876	0.6119367409348	0.999905554516238	-4.92482609571581
A6NJ78	METTL15	-0.11157939039071	3.03607236097427	-0.379751821632421	0.718626715174858	0.999905554516238	-4.92494900813724
Q8N9I9-2	DTX3	0.0453043948516538	3.30518125102529	0.72546014118918	0.498418248031584	0.999905554516238	-4.92498194438829
Q9H0U3	MAGT1	-0.108311553042724	3.20225744628027	-1.00045177856928	0.359837790466396	0.999905554516238	-4.92507402670791
Q9BTV4	TMEM43	-0.0883087680040459	3.20715635229989	-1.40773046306198	0.214149467381905	0.999905554516238	-4.9251273265426
O00584	RNASET2	0.104119712097498	3.37658026251142	0.963455357010836	0.376500281575731	0.999905554516238	-4.92547996970322
Q4G176	ACSF3	0.0380824793747084	3.29703670732343	0.620543652866919	0.56018273701766	0.999905554516238	-4.925547551891
O75575-1	CRCP	-0.0504364660742886	3.25138468196356	-0.756339746597062	0.481158792796803	0.999905554516238	-4.92555263764176
Q8IYB1	MB21D2	-0.0137666079960781	3.33454629081831	-0.17140193876453	0.870154642077919	0.999905554516238	-4.92558378467246
Q5T5C0-1	STXBP5	-0.0243081318063387	3.29695708575333	-0.209422247759233	0.841801147391424	0.999905554516238	-4.92559884599557
Q96S53-1	TESK2	0.0284140755349441	3.38311014656556	0.400799781672723	0.703955675021138	0.999905554516238	-4.92566911144502
Q86WA6	BPHL	-0.0536277249393864	3.18546936020278	-0.372246057118288	0.723891654942956	0.999905554516238	-4.9257886584421
P00966	ASS1	0.119834252213835	2.57929280468534	0.997336099771197	0.361217595640704	0.999905554516238	-4.92586054986618
Q96P47-4	AGAP3	-0.0101088452837917	3.23283713772882	-0.129037726377985	0.902003007489824	0.999905554516238	-4.92627955528799
Q15035	TRAM2	-0.0966915207712148	3.26100619645	-0.741779568891677	0.489243938412443	0.999905554516238	-4.92628042219706
Q09327	MGAT3	-0.0345569112709511	3.36648418620631	-0.278795213786357	0.790778315267592	0.999905554516238	-4.92658061258413
P41970	ELK3	0.0405337630438137	3.40506283363189	0.604867996844378	0.569814971270427	0.999905554516238	-4.92664573318582
Q9GZL7	WDR12	-0.0482444385922274	3.24015213347887	-1.38400961677888	0.220892996818854	0.999905554516238	-4.92687131201362
O94941-1	UBOX5	-0.0123463629849766	3.35497946360106	-0.155276199402865	0.882249067809025	0.999905554516238	-4.92687769215002
P49593	PPM1F	0.0662055958310203	3.22690625403758	0.901017995563419	0.406010236255012	0.999905554516238	-4.92692629400272
Q13017-1	ARHGAP5	0.0461542719865871	3.14402513478625	0.974904954217769	0.37127851768753	0.999905554516238	-4.92710681352171
Q8TB96	ITFG1	-0.0547499382626909	3.33174649376063	-0.480669466083375	0.649619527860297	0.999905554516238	-4.92735441735333
P28370-1	SMARCA1	0.102422432076519	1.83715234873311	0.815420571512103	0.449328228701049	0.999905554516238	-4.92766712574083
Q9NWB6	ARGLU1	0.0725034164217761	3.3910868881913	0.867001093001086	0.422827813279534	0.999905554516238	-4.92794783508367
Q7KYR7	BTN2A1	-0.0181219624582675	3.29333786589501	-0.224429225102227	0.830679986444205	0.999905554516238	-4.92812407651012
Q92543	SNX19	-0.107214483766811	3.24641027328031	-0.578581990675381	0.586195054069107	0.999905554516238	-4.92832857587909
Q9H0R6-1	QRSL1	0.0335453870320671	3.12234013370789	0.454235874094984	0.667358608292247	0.999905554516238	-4.92838742386726
Q9P202-1	DFNB31; WHRN	0.0320120756004459	3.41943308351002	0.411230169810402	0.696737575724765	0.999905554516238	-4.92890001522232
O15287	FANCG	-0.0383644210197693	3.28675277990186	-0.664427813242025	0.533769035504542	0.999905554516238	-4.92890868868896
P30279	CCND2	0.00786475979259563	3.3298565052146	0.0777813623922881	0.940805904465347	0.999905554516238	-4.92907975868053
O75586-2	MED6	-0.0335357446909198	3.33055087904267	-0.443901424086032	0.674360977066721	0.999905554516238	-4.92915425481713
Q86T82	USP37	-0.0269836572991849	3.33750291768754	-0.340705425846065	0.746198829047866	0.999905554516238	-4.92951228033443
O95707	POP4	-0.0427591811697609	3.26596941417998	-0.617740741381724	0.561897507875359	0.999905554516238	-4.92951890532531
Q13045-1	FLII	0.0668283708194591	3.37123970813269	0.720476654692499	0.501243381001108	0.999905554516238	-4.9295461212286
O75362	ZNF217	-0.0457047765085242	3.35486631220015	-1.16797020444578	0.291839805275517	0.999905554516238	-4.92958579458427
Q9NS69	TOMM22	-0.127751111455142	3.05466116504877	-0.921055334258348	0.396348766981346	0.999905554516238	-4.92966518551229
Q8NHH9	ATL2	-0.13304644414815	3.07392335364	-0.955155060270828	0.380322377119586	0.999905554516238	-4.92978223557548
Q02156	PRKCE	0.0502753741425035	3.38167865109265	0.70736503237861	0.508728786431392	0.999905554516238	-4.93003623688396
Q8NDD1	C1orf131	-0.0357649273387243	3.24081860790059	-0.568426987383635	0.592598572346239	0.999905554516238	-4.93010987028004
Q9H1A3	METTL9	-0.0227034962054272	3.23823955483452	-0.243196139055127	0.816834558475508	0.999905554516238	-4.93025239638891
Q96FN4	CPNE2	0.0472008377584723	3.23942362329356	0.716620279856952	0.503437099274045	0.999905554516238	-4.9303428219471
Q9P021	CRIPT	0.174093823210502	3.39067572293855	0.818581250660315	0.447669734295079	0.999905554516238	-4.93050060435055
P01903	HLA-DRA	-0.0670242447544715	3.41365211422913	-1.28487436303751	0.251247880006533	0.999905554516238	-4.9305538622857
P17947-2	SPI1	-0.0256378346282584	3.43222268420323	-0.211070861721245	0.840577352824232	0.999905554516238	-4.93058798197346
P52735	VAV2	-0.040563199048516	3.12404709718742	-0.62277264588236	0.558821432146911	0.999905554516238	-4.93069351350297
O00488	ZNF593	0.0179339701199304	3.40980668228496	0.192175854986663	0.854632539130994	0.999905554516238	-4.93086169065956
Q96K37-1	SLC35E1	-0.0779747530138982	3.28329402574267	-0.633113015873665	0.552533659451471	0.999905554516238	-4.93092405107748
Q8TB73	NDNF	-0.0449768074140811	3.39413096210696	-0.855174025998813	0.428797714842151	0.999905554516238	-4.93110606978822
Q92674	CENPI	0.0578386389340643	3.32002149896556	0.785682005579189	0.465153824054168	0.999905554516238	-4.93123944060446
Q9Y5B8	NME7	-0.0683569587207925	3.05655018278343	-1.02779699333471	0.347911453503708	0.999905554516238	-4.93125641004466
P14635	CCNB1	0.0431348118029841	3.20826934450027	1.10290565282689	0.316828898825528	0.999905554516238	-4.93128330490436
O75208-1	COQ9	0.0416825973839013	3.30009428835581	0.961361010657175	0.377461773351485	0.999905554516238	-4.9313603729745
Q9NVJ2	ARL8B	-0.114206010145178	3.2815958692483	-0.883371202129539	0.414669256245088	0.999905554516238	-4.93174983876039
Q8N531-1	FBXL6	-0.0205651220426674	3.38394635142128	-0.224700001649227	0.830479718214333	0.999905554516238	-4.93177608359035
Q9NS56	TOPORS	0.00365001012682327	3.32182720133085	0.0351005881289138	0.97326192010491	0.999905554516238	-4.93197339667507
Q5RI15-2	COX20	-0.081818720346936	3.11570377431894	-0.61696741694372	0.562371193247101	0.999905554516238	-4.93202242497555
Q9H300	PARL	0.0457185089068981	3.03782734604144	0.520395625159452	0.623441196460475	0.999905554516238	-4.93207994430026
Q8NCL4	GALNT6	-0.040262445610222	3.32856716535238	-0.443149993614761	0.674871571564652	0.999905554516238	-4.93246447654364
Q9Y5Y2	NUBP2	-0.0418495297587367	3.36051950223953	-0.733841948996053	0.493691450735839	0.999905554516238	-4.93251122386007
Q8N0Z3	SPICE1	-0.0101099744297901	3.25928151248178	-0.0927459976895048	0.929452846486576	0.999905554516238	-4.93270595561043
P63172	DYNLT1	-0.0343243474029304	2.64685704900214	-0.426645536367915	0.686134933851077	0.999905554516238	-4.93271459724719
Q9BTV6	DPH7; WDR85	0.0361508493171114	3.31562836864321	0.451418516101664	0.669263894457182	0.999905554516238	-4.93279509592071
Q8IWY9	CDAN1	0.0612380094996939	3.35663092754534	0.764181286691054	0.476843729603497	0.999905554516238	-4.93286090712186
P23743-1	DGKA	0.0429897148185974	3.2782019497093	0.950093129251887	0.382668418299684	0.999905554516238	-4.93292658910128
P19878	NCF2	0.0476503475543164	3.42461287067956	1.32936141657103	0.237183071143114	0.999905554516238	-4.93306996921072
Q9UBU7	DBF4	0.0358922110393594	3.26550800202253	0.4176919362595	0.692283630206416	0.999905554516238	-4.93346377028405
O94864-1	SUPT7L	-0.0355155775551447	3.31256661781089	-0.428680787872757	0.684741001788325	0.999905554516238	-4.93352806383468
Q5BJH7	YIF1B	-0.0195719274834102	3.28745262572886	-0.163977079785581	0.875718668695905	0.999905554516238	-4.93377390688525
Q9P0P8	C6orf203	0.144465823843847	3.4170401703451	0.513130476579193	0.628184424618697	0.999905554516238	-4.93395708963371
Q96PE7	MCEE	0.0915603512285808	3.42359796252692	1.09798871994989	0.3187895685929	0.999905554516238	-4.93396153965903
Q7Z434	MAVS	-0.0586346585214853	3.18390764413572	-0.930217530167341	0.39199131067446	0.999905554516238	-4.93466516710756
Q8N8Q8-1	COX18	0.0485050476216698	3.03945246917307	0.458569787690743	0.664433160783615	0.999905554516238	-4.93472396225738
Q13761-2	RUNX3	-0.0307864744011653	3.42627418739325	-0.429657114034404	0.684072815869065	0.999905554516238	-4.93475195065962
Q16560-2	SNRNP35	-0.0395596913114267	3.31932559492541	-0.540502113527943	0.610419999094639	0.999905554516238	-4.93475628224817
Q92485-1	SMPDL3B	-0.0777301399145727	3.1523949976275	-0.855487908449675	0.42863845917538	0.999905554516238	-4.93485700601012
Q8N568-3	DCLK2	0.00787547650245272	3.28267099148397	0.0850148040287826	0.935316048455355	0.999905554516238	-4.93515934939846
O75323-1	GBAS; NIPSNAP2	0.0526140128151095	3.32765975125075	1.0533086929478	0.337080286594935	0.999905554516238	-4.93523339403576
P17544-6	ATF7	-0.0274496494176517	3.30202457170008	-0.325769474919231	0.756861267188623	0.999905554516238	-4.93568654187956
O75554	WBP4	0.042065503506206	3.25254019752824	0.712293823511329	0.50590604722023	0.999905554516238	-4.93569795809215
Q7Z7H5	TMED4	0.123493133259937	3.3382191771207	1.05041879230228	0.338292976623188	0.999905554516238	-4.93569970695932
Q9NVE7	PANK4	0.0630261208443664	3.40425861354372	1.48924505238082	0.192417262632439	0.999905554516238	-4.93589851289405
Q99717	SMAD5	-0.0634931667117199	3.33279973853134	-0.703819895019388	0.510765715918777	0.999905554516238	-4.93596875581868
P48681	NES	0.0524650703435125	2.64839121594299	1.28209649408051	0.252150695621293	0.999905554516238	-4.93613697650408
Q92889	ERCC4	0.0478893062474333	3.3142850811138	1.30258364696815	0.245560694804631	0.999905554516238	-4.93710820168082
Q9UGN5-1	PARP2	-0.0460967329385633	3.08036843688163	-0.678832736258126	0.525278816917004	0.999905554516238	-4.9373098660772
Q86X52	CHSY1	0.00324287186826355	3.20077370780667	0.0312816910527044	0.976169794321927	0.999905554516238	-4.93741275301719
O43752	STX6	-0.0209544519799796	3.31466148394993	-0.211129689645505	0.840533693069747	0.999905554516238	-4.93742315838049
Q9UQL6-3	HDAC5	0.0430115887881717	3.35024351644357	0.551371483630006	0.603446511052959	0.999905554516238	-4.93786505804272
Q14166	TTLL12	0.0310201628814525	3.32001268878625	1.58596914782208	0.169348693665434	0.999905554516238	-4.93811990803534
Q9BYE7-1	PCGF6	-0.0571768966408618	3.23688078858167	-0.581467280387515	0.584383274007426	0.999905554516238	-4.93828889373729
Q9HBL7	PLGRKT	-0.0141830735382675	3.27084403480612	-0.13304759581755	0.898978614585068	0.999905554516238	-4.93830533653994
Q9Y5W9	SNX11	-0.0231648624869756	3.32878309456418	-0.316085924877421	0.763806598131054	0.999905554516238	-4.93848617888552
P08887-1	IL6R	-0.11753162848118	3.36704229998097	-0.608618373922781	0.567501152706485	0.999905554516238	-4.93865788242896
Q6DD87	ZNF787	0.0172706107450634	3.33452178425331	0.20403710842767	0.845802072534204	0.999905554516238	-4.9386736746304
Q96LB3-1	IFT74	-0.0356601253504563	3.11454478654018	-0.544008583998124	0.608165268688098	0.999905554516238	-4.93886457661487
Q9NS93	TM7SF3	0.0110853786569872	3.29743722888916	0.114731595011669	0.912807906493755	0.999905554516238	-4.93892670407469
Q9NX62	IMPAD1	0.0308238073834879	3.22418607383819	0.318191052327949	0.762294607347669	0.999905554516238	-4.93901958531402
Q8NEN9	PDZD8	-0.0646406523214744	3.16293586081504	-0.695725844208151	0.515437010063234	0.999905554516238	-4.93910520547291
Q15013-3	MAD2L1BP	-0.00246105020057212	3.27583172708849	-0.0276542976464882	0.978932231381736	0.999905554516238	-4.93926155571795
Q3L8U1-1	CHD9	-0.0525338559595197	3.32530700681252	-0.610273281833273	0.566482006455589	0.999905554516238	-4.9393315546687
O75312	ZNF259; ZPR1	-0.0410097102975123	3.34450110258906	-1.41870891919834	0.211093812053778	0.999905554516238	-4.93942417355306
Q6ZRQ5	MMS22L	-0.0677381627586847	3.27178295289227	-1.27178473657298	0.255527685657495	0.999905554516238	-4.93988277650014
Q5T7V8	GORAB	-0.0259189150058347	3.29833388887679	-0.322294908473262	0.759350438382197	0.999905554516238	-4.93996139914114
Q86Y07	VRK2	-0.0927456521678271	3.1937582377806	-0.809733557516812	0.452323734280332	0.999905554516238	-4.94021630018372
A4D1U4	KIAA1147	-0.00457974029306716	3.31836564021915	-0.0613839425066904	0.9532638256911	0.999905554516238	-4.94037076372041
Q02083	NAAA	0.0513627046859228	3.39662209154471	0.885602924156019	0.413566403414806	0.999905554516238	-4.94083914708441
P55347	PKNOX1	-0.0185476511543634	3.31285460809188	-0.2417046005457	0.817932317202138	0.999905554516238	-4.94106560143508
Q8IWP9	CCDC28A	-0.0174463051263159	3.31862345182664	-0.236892668571088	0.821477006495734	0.999905554516238	-4.94106876331312
Q8N680	ZBTB2	0.0149641937041864	3.26966507996211	0.169278825559399	0.871744820054765	0.999905554516238	-4.94146371041742
Q9UGK3-2	STAP2	-0.0083592639454252	3.34963699361004	-0.0957404708634285	0.927183204232676	0.999905554516238	-4.94149028314817
O43572	AKAP10	0.0275010827883546	3.31632640901319	0.320103876300885	0.76092175828314	0.999905554516238	-4.94155761785528
Q9BYC9	MRPL20	0.12596134296844	3.2986400988463	0.75527129054563	0.481748876789495	0.999905554516238	-4.94172107539003
Q86Y39-1	NDUFA11	0.0465898086792378	3.15350568193848	0.345492426841928	0.742794672692804	0.999905554516238	-4.94181443091723
Q9BQE4	VIMP; SELENOS	-0.127333320543371	3.12928836611586	-0.923994943433479	0.394946596957938	0.999905554516238	-4.94182974546977
Q96CS3	FAF2	-0.0705810366729742	3.11517636118114	-1.09073720510384	0.321699944616763	0.999905554516238	-4.94185365444476
Q96AX1	VPS33A	-0.0735754909225796	3.31339377716533	-1.29681950585969	0.247398870088902	0.999905554516238	-4.94197010396512
P06213-1	INSR	-0.0877475771516966	3.29257886980989	-1.25248489790192	0.261957598760428	0.999905554516238	-4.94280748646742
Q7Z7A4-1	PXK	-0.0716163010770602	3.3233127639761	-1.03611280407677	0.344349719535173	0.999905554516238	-4.94307924489469
Q9Y3D6	FIS1	0.0172502338878607	3.3674429873738	0.235895096648596	0.822212460174	0.999905554516238	-4.94312170812241
P36955	SERPINF1	0.00565735907964943	3.19479513437353	0.0616265586637078	0.953079380287716	0.999905554516238	-4.9434487076583
Q96BW9-3	TAMM41	0.0352126841123594	3.22351389945316	0.449208785029605	0.670760201403855	0.999905554516238	-4.94382397682189
Q9NUA8-1	ZBTB40	0.0648073675625002	3.36800844893834	0.633070266107002	0.552559561782779	0.999905554516238	-4.94388265282607
Q16584	MAP3K11	0.000467727424275426	3.35576411804396	0.00465978453556185	0.996449532913356	0.999905554516238	-4.94415627625031
Q96EK4	THAP11	-0.0389234712900322	3.33281866692728	-0.533453079170386	0.614967205741994	0.999905554516238	-4.94418391879613
Q7Z3D6-2	C14orf159; DGLUCY	0.0553004024941446	3.3145506690425	1.13853864977481	0.302924868639932	0.999905554516238	-4.94461700413052
O94925-3	GLS	0.0433286997608714	3.20008593771425	0.722912956506129	0.499860869913148	0.999905554516238	-4.94486713281413
Q13111-1	CHAF1A	-0.0428545579649423	3.25715327882603	-1.4615178543115	0.199564795039254	0.999905554516238	-4.94491437279689
Q9Y592	CCDC41; CEP83	-0.00281034247645946	3.32911846196373	-0.0350834135996788	0.97327499654154	0.999905554516238	-4.94499035403929
Q5VVQ6-1	YOD1	0.0130927067654301	3.24978657062038	0.138795100176778	0.894646970293452	0.999905554516238	-4.94503549360594
Q9Y6M5	SLC30A1	-0.120781525687436	3.33841179791744	-1.48007591072424	0.194753602485037	0.999905554516238	-4.94509566801076
P53701	HCCS	-0.0798944904342221	3.33069855888859	-1.22229599784059	0.272305477630938	0.999905554516238	-4.94543615028079
Q9H9V9	JMJD4	0.0142123059434237	3.32071534051951	0.174271125015865	0.868006752523864	0.999905554516238	-4.94545778360231
Q9Y2S2-1	CRYL1	0.00749782940194121	3.46386970536164	0.0845181074809486	0.935692894820532	0.999905554516238	-4.94549427722336
Q92890-1	UFD1L; UFD1	-0.0362827268877594	3.37905943535488	-1.43148791431814	0.207588379277359	0.999905554516238	-4.94557969547346
Q8IVH2-1	FOXP4	0.0201851649398245	3.24687903212049	0.16952960230363	0.871556957005302	0.999905554516238	-4.94635814031057
Q00978	IRF9	-0.0101509768760786	3.42634533448755	-0.106044271104268	0.919379532849337	0.999905554516238	-4.9466835962871
Q92552-2	MRPS27	0.0810734282809792	3.2097341630107	1.20106629637287	0.27979790363666	0.999905554516238	-4.94693373228182
Q68CQ7-1	GLT8D1	-0.0268207651275887	3.10571626185768	-0.236151191863372	0.822023636166634	0.999905554516238	-4.94764416162472
Q8IWU6	SULF1	-0.0420741645328392	3.39544816368506	-0.640547065411496	0.548041107959709	0.999905554516238	-4.9479550663256
Q9Y6G3	MRPL42	0.043992077581021	3.24101644035549	0.586225894885019	0.581402568555067	0.999905554516238	-4.94832032384837
Q96CB9	NSUN4	-0.0450962164546168	3.26395880117439	-0.91330452682554	0.400064514105471	0.999905554516238	-4.94845316757805
P15880	RPS2	-0.064092240607338	3.27498897179171	-1.65767082278851	0.15399861240452	0.999905554516238	-4.94931699510617
Q9BSF4	C19orf52; TIMM29	-0.0568434008257034	3.24447565761787	-0.574103050951078	0.589014236520732	0.999905554516238	-4.94974625383204
Q9BQA9-1	C17orf62	-0.113915977455296	3.27926351011548	-0.75971233969638	0.479299538079598	0.999905554516238	-4.94998951166336
Q86WX3	RPS19BP1	-0.0569407734805537	3.30950330741946	-0.708762095741959	0.507927595309849	0.999905554516238	-4.95029401557445
Q9H553-1	ALG2	0.0823122447883761	3.41582139703726	1.12899025832965	0.306598376982753	0.999905554516238	-4.95042167154196
Q9NVU7	SDAD1	-0.0547739524341137	3.38687722395334	-1.13819457008653	0.303056584165321	0.999905554516238	-4.95049729922825
Q9Y5X2	SNX8	-0.0420193398720545	3.33679010467522	-1.05444950205507	0.336602566324665	0.999905554516238	-4.95050605946951
Q9H1C4	UNC93B1	-0.0941818125116492	3.3124474620666	-0.925614432887383	0.394175776427554	0.999905554516238	-4.95072317344595
Q93063-3	EXT2	-0.0399160648451018	3.1797879710114	-0.418191021639499	0.691940193587592	0.999905554516238	-4.95105449644871
Q9ULD4	BRPF3	0.0394819829617381	3.29037320605801	0.581584323126974	0.584309849981466	0.999905554516238	-4.95121505083973
Q9NYK6-1	C21orf91	0.0143987396646457	3.29744191763114	0.160904417455275	0.87802361356585	0.999905554516238	-4.95133408822853
Q9BPW8	NIPSNAP1	0.0443918999502259	3.33704429949626	0.901024100907906	0.406007264814994	0.999905554516238	-4.95150216712613
Q9UDX5	MTFP1	0.00817517566825737	3.0180704804479	0.0532141672225781	0.959476596767952	0.999905554516238	-4.95170403472223
Q969U6	FBXW5	0.0169058319542406	3.41060375291227	0.195300918265808	0.852303633089297	0.999905554516238	-4.95214095196569
Q9BYG5	PARD6B	-0.0489048113749891	2.98109169608779	-0.70247148724517	0.511541921469039	0.999905554516238	-4.95231353151882
Q9Y619	SLC25A15	-0.00078308389597853	3.27221315601671	-0.0039500292650625	0.996990318818064	0.999905554516238	-4.95249494009123
Q96RR4-1	CAMKK2	-0.0450213086826562	3.33214869264844	-0.61050083159881	0.566341963062319	0.999905554516238	-4.95251688778168
Q6UW68	TMEM205	-0.0743367488569312	3.23614797874632	-0.868318055844273	0.422166975398171	0.999905554516238	-4.95261198881814
P16989-1	CSDA; YBX3	-0.0444520833318908	3.13916982022942	-0.400680707080358	0.704038280048572	0.999905554516238	-4.95276517451078
Q16875-4	PFKFB3	-0.00811013581190139	3.23875064367431	-0.0812784613714689	0.938151286430361	0.999905554516238	-4.95297721645862
Q58A45	PAN3	-0.0472335589099608	3.20183973993664	-0.625876537073974	0.55692928305245	0.999905554516238	-4.95300159526961
Q8WVM0	TFB1M	0.0404432115892045	3.1063991042517	0.65875930694284	0.53713461607272	0.999905554516238	-4.95309597261065
Q9NPA3	MID1IP1	0.0237434874922846	3.07862685739253	0.295177712209352	0.77888626784897	0.999905554516238	-4.95340078693653
Q8TD46-4	CD200R1	0.0498664195800446	3.38286566837308	0.57531805831117	0.58824867054544	0.999905554516238	-4.95344801787697
Q8WUY1	THEM6	-0.0825090157397476	3.23775858942074	-0.720161338299377	0.501422503401058	0.999905554516238	-4.9536619362301
O75907	DGAT1	-0.0467264372223259	3.22128526537495	-0.254137457718833	0.808796286994871	0.999905554516238	-4.95367436852805
O60830-2	TIMM17B	-0.0734559675787811	2.85175412443599	-0.58363469001551	0.583024504997234	0.999905554516238	-4.95369938158434
Q86WG5	SBF2	-0.00293465525971526	3.24542642148978	-0.0327286446321282	0.975067969814835	0.999905554516238	-4.95379092783283
Q05469-1	LIPE	-0.0445912384066512	3.39276309341225	-1.12490521532602	0.308181642405494	0.999905554516238	-4.95417321062897
Q9UBS0	RPS6KB2	-0.0286848295595023	3.41716990559404	-0.440893859973338	0.676405774614671	0.999905554516238	-4.95419912211779
Q96GN5-1	CDCA7L	-0.0385647031723908	3.27337124546093	-0.615543059419187	0.56324431171559	0.999905554516238	-4.95424570653964
Q14511-1	NEDD9	-0.0373992805602497	3.37614953151483	-0.485463106947821	0.646429582748252	0.999905554516238	-4.95430818119608
Q9HCL2	GPAM	0.0285479403239883	3.25649745197691	0.397165001860247	0.706479252931286	0.999905554516238	-4.95443082844652
Q7Z3B3	KANSL1	-0.0326615332240202	3.3082019125714	-0.442471069024459	0.675333065823925	0.999905554516238	-4.95470840209218
Q99618	CDCA3	-0.0468913415600981	3.35070312842999	-0.814137391400269	0.450002837468662	0.999905554516238	-4.95491163067639
O60930	RNASEH1	0.0159879216622364	3.31079125518013	0.216749636031624	0.83636575515645	0.999905554516238	-4.95493555334138
P08069	IGF1R	-0.0689484940532233	3.30278121427007	-0.776270209910391	0.47024543368167	0.999905554516238	-4.95499841307518
Q7Z736	PLEKHH3	0.00338269548975769	3.29077029361864	0.042454401327669	0.967663751830244	0.999905554516238	-4.95514219130045
Q9UBX3-2	SLC25A10	-0.0522643919980308	3.03867871020429	-0.554813777409075	0.60124775122308	0.999905554516238	-4.95557477978355
Q9BXK1	KLF16	0.00198662388481167	3.4395669479413	0.0191346226084093	0.985421595174567	0.999905554516238	-4.95561986580107
Q96S82	UBL7	-0.013765206127859	3.36321159842385	-0.125874753086314	0.904389947640701	0.999905554516238	-4.95683561974533
Q6IEG0-1	SNRNP48	0.0122243529850433	3.26355310518657	0.102031052026744	0.922417833285238	0.999905554516238	-4.95689203904923
Q12767-2	KIAA0195; TMEM94	-0.0587149504243955	3.24502338275909	-0.613873010444567	0.564269117179424	0.999905554516238	-4.95732155792726
Q16539	MAPK14	0.00108937215139723	3.35186143807362	0.0112330412277369	0.991441295250009	0.999905554516238	-4.95787520323649
Q86W34-4	AMZ2	-0.0396044423789704	3.16902333480429	-0.615161689979149	0.563478231790138	0.999905554516238	-4.95809932162675
Q96IK1	BOD1	-0.0349385666192013	2.76941676319529	-0.611381485030303	0.565800176379821	0.999905554516238	-4.95819350676768
Q9UKT5	FBXO4	-0.0213062119566586	3.39967394066983	-0.282996355744592	0.787722509957514	0.999905554516238	-4.95835628559676
P17812	CTPS1	-0.047932496928646	3.30167103344951	-1.67164771308427	0.151169059484237	0.999905554516238	-4.9587124487048
Q9HAB8-1	PPCS	-0.0514870861708035	3.40156458814925	-1.23104536149239	0.269269668184844	0.999905554516238	-4.95885962756223
Q99574	SERPINI1	0.0285642294028315	3.24167280062205	0.265638067288179	0.800375315938749	0.999905554516238	-4.95927678635362
Q9Y4F1	FARP1	-0.0488956908862788	3.17838884379962	-0.950778944537467	0.382349892765621	0.999905554516238	-4.95941479945217
O15360	FANCA	-0.0061791888792152	3.22768426965618	-0.0794173640748429	0.939563920761359	0.999905554516238	-4.9596940115494
Q96C92-4	SDCCAG3	0.0432745686335103	3.35559569344295	0.638571626786845	0.549232618314987	0.999905554516238	-4.95992009932869
Q8TBF4	ZCRB1	-0.0390701980942868	3.23205484043584	-0.565708185709555	0.594320042327731	0.999905554516238	-4.95994659429888
O95319-3	CELF2	-0.0320823975906647	3.3928585056716	-1.4100428022743	0.213502456858691	0.999905554516238	-4.95996790823637
Q86UL3	AGPAT6; GPAT4	-0.0352974662353558	3.16873364668857	-0.424136326012444	0.68785538847066	0.999905554516238	-4.96050204960559
P35610	SOAT1	-0.0779763308369447	3.15880531731386	-0.715231930434348	0.504228478129693	0.999905554516238	-4.96070247381218
Q0PNE2	ELP6	-0.044204303827545	3.33071663277748	-0.985202797454566	0.366631927674546	0.999905554516238	-4.96070256023497
Q15361	TTF1	-0.0493403127076411	3.26066949390367	-0.81124972332997	0.451523699178769	0.999905554516238	-4.96083769635561
Q8N442	GUF1	0.0455197502511039	3.15363727724056	0.628571559784423	0.555289673412896	0.999905554516238	-4.96111639223208
Q9UKV0-7	HDAC9	-0.0399536111788557	3.35769294834569	-0.540771421707127	0.610246657802084	0.999905554516238	-4.96116036381918
Q05048	CSTF1	-0.0327508409755183	3.2767895465189	-1.31375400550205	0.24203374447673	0.999905554516238	-4.96119869170779
O95674-1	CDS2	-0.0633305238647363	3.22233172135345	-0.689622802125379	0.518978225129317	0.999905554516238	-4.9614296631934
Q96L58	B3GALT6	0.0503996921077954	3.16064739126031	0.564566230486563	0.59504398153344	0.999905554516238	-4.96157498154357
Q2TAA5	ALG11	-0.0787731375511068	3.23423026019588	-0.573925092652297	0.589126416678797	0.999905554516238	-4.96182925309573
Q96MH6-1	TMEM68	-0.0490081760851204	3.19171709044728	-0.386469528743555	0.713929220976043	0.999905554516238	-4.96210013056534
Q9NZM5	GLTSCR2; NOP53	0.00388636273708181	3.33235385067832	0.0484329188177627	0.963114051590943	0.999905554516238	-4.9624612406418
Q9H213	MAGEH1	0.0116283827785894	3.41322400675187	0.106315283376439	0.919174411215556	0.999905554516238	-4.96263072606068
Q12893	TMEM115	-0.0147380207656575	3.24999837488398	-0.120324639852447	0.908581043289554	0.999905554516238	-4.96289210244393
Q5JVS0	HABP4	-0.0747077596588863	3.15173298153256	-0.640076894707611	0.548324546837132	0.999905554516238	-4.9631095574574
Q5SWA1	PPP1R15B	0.0539755136062694	3.23213977034072	0.479019835489892	0.650719217920681	0.999905554516238	-4.9633827154537
Q52LR7	EPC2	0.0194952779952678	3.30377270261425	0.241641071665423	0.817979084203379	0.999905554516238	-4.963437254802
O15392	BIRC5	0.0667110123466874	3.3344468067064	0.848309650656904	0.432291677929256	0.999905554516238	-4.96356267462015
O60331-3	PIP5K1C	0.033781526718758	3.41433449086479	0.389124756416688	0.712076361269858	0.999905554516238	-4.96437499733718
Q68CZ1	RPGRIP1L	-0.0223222791759893	3.32426063269174	-0.265445784785542	0.800515865189438	0.999905554516238	-4.96446627764401
Q9UGN4-1	CD300A	-0.0205306883594077	3.34487052299582	-0.187745494539073	0.857937015089933	0.999905554516238	-4.96452891668304
Q8N6V9	TEX9	-0.00571790091300665	3.37878877199029	-0.0724496346094342	0.944854806493954	0.999905554516238	-4.9645605448534
P00387-3	CYB5R3	-0.0493908209973777	3.19665882894244	-1.28775126185318	0.250315957186021	0.999905554516238	-4.96457322174022
Q8IWT0	ZBTB8OS	-0.00249858847098281	3.35344517237365	-0.0327648280016799	0.975040417726369	0.999905554516238	-4.96481181843018
Q9Y6N5	SQRDL; SQOR	0.0584256107703151	3.30709122109909	1.49391747120349	0.191236972012657	0.999905554516238	-4.96492012479212
Q9NQ34	TMEM9B	-0.0233033763155535	3.34652322160653	-0.308963915903918	0.768930569633659	0.999905554516238	-4.96493284806745
Q92966	SNAPC3	0.00351693501549585	3.28239245256777	0.0489795809549074	0.962698112252771	0.999905554516238	-4.96515295601985
O95168-1	NDUFB4	0.00323781231303792	3.18734477506817	0.040582388458719	0.969088659201454	0.999905554516238	-4.965220591269
Q9HC52	CBX8	-0.0373301163145744	3.25030363216325	-1.16724582768861	0.292108350786453	0.999905554516238	-4.96524789034711
Q9NWS6	FAM118A	-0.0637622321986172	3.33430204528795	-0.606290524982835	0.568936645971618	0.999905554516238	-4.96535159839774
Q9BWT6	MND1	-0.0193796543269982	3.21579150676252	-0.285867302815621	0.785636690877594	0.999905554516238	-4.96558112382621
Q8N4V1	MMGT1	-0.0957054332392872	3.07079305863255	-0.806912869654091	0.453814890234256	0.999905554516238	-4.96573845585182
P52597	HNRNPF	-0.0269722025348891	3.34623473262824	-1.80865951342653	0.126018649168572	0.999905554516238	-4.96618773087984
Q92542-1	NCSTN	0.0413193470145145	3.31320417196528	0.939743605722387	0.387500847692267	0.999905554516238	-4.96650700233803
O14737	PDCD5	-0.0351555893676062	3.28748073633883	-1.38277275777276	0.221249973791596	0.999905554516238	-4.96696402342678
Q9Y2K1	ZBTB1	0.0378432691714918	3.44805244696177	0.397469609019461	0.706267606730772	0.999905554516238	-4.96743184329416
Q9H2P0	ADNP	0.0401717281110324	3.26128955690045	1.67217435055709	0.151063449348844	0.999905554516238	-4.96756000020612
Q16836-2	HADH	0.0462609948977757	3.3763121458763	1.66750566335033	0.152002227678188	0.999905554516238	-4.96769279795201
Q96AD5-1	PNPLA2	-0.0486660367841937	3.24439006233248	-0.529989912914696	0.617208309935875	0.999905554516238	-4.96778804049874
P58004	SESN2	0.0182155529626819	3.01400189222462	0.22509880837401	0.83018478403137	0.999905554516238	-4.96804743249325
P45877	PPIC	0.0371430684538821	2.59866499195055	0.604172044176385	0.570244985883358	0.999905554516238	-4.96806129170791
Q9NVX0	HAUS2	-0.0219149921296832	3.23504427287778	-0.280950059377406	0.789210408312525	0.999905554516238	-4.96824314484926
Q96EY8	MMAB	0.0366792948767427	3.14290424209413	0.589979563311139	0.579057867704076	0.999905554516238	-4.96833687093982
Q9NPR9	GPR108	-0.00605975325494086	3.38696364126831	-0.0717220053181352	0.945407513217161	0.999905554516238	-4.96836834018148
Q6PII3	CCDC174	-0.0416159938305944	3.32525437848374	-0.89578089833236	0.408565309194776	0.999905554516238	-4.9684652132882
Q9Y3D3	MRPS16	0.0394034659286409	3.25917310247077	0.67245763620946	0.52902519666095	0.999905554516238	-4.96856205956228
Q6PIW4	FIGNL1	-0.0892207523240958	3.2005655834076	-1.07680666365781	0.3273539630268	0.999905554516238	-4.9690898472852
Q9Y2V7-1	COG6	0.0479917157183551	3.28476439579577	0.774401270200216	0.471261237009261	0.999905554516238	-4.96965546314207
Q9H1E5	TMX4	-0.0664112587645704	3.16986469830869	-0.71018191956585	0.50711423242193	0.999905554516238	-4.96996171109328
Q8N9N5-7	BANP	0.032749823081061	3.25201804534774	0.506978005998851	0.63221688228318	0.999905554516238	-4.97067645052008
Q9H6S3-3	EPS8L2	-0.0191212070516957	3.42675455973235	-0.204837189311555	0.84520731673291	0.999905554516238	-4.97085090330906
P31939	ATIC	-0.0351481621203504	3.3448453811595	-1.92020807394876	0.108674683323808	0.999905554516238	-4.97107787485848
Q96G01	BICD1	-0.0582185225852157	3.32300309293305	-0.856507226166383	0.428121592078508	0.999905554516238	-4.97131488652744
Q96GS6-2	ABHD17A; FAM108A1	-0.0103900772045565	3.34703910253046	-0.12678430978569	0.903703433704588	0.999905554516238	-4.97133543126852
O15525	MAFG	-0.0370126802242572	3.34227828741895	-0.621052637239149	0.559871703023069	0.999905554516238	-4.97157665361121
P28072	PSMB6	-0.0556879024489706	3.25725756012781	-0.873764135087044	0.419442530856722	0.999905554516238	-4.97200049040118
O75027-2	ABCB7	0.187594685026543	2.96395934174919	0.763207843709085	0.477377900661626	0.999905554516238	-4.97208100381349
Q9H3F6-1	KCTD10	-0.042960348084131	3.29323859099439	-0.907614183655209	0.402809722883332	0.999905554516238	-4.97215124593155
Q4KMQ2-2	ANO6	-0.0694640884409825	3.29064514585425	-1.0090189267033	0.356065877272572	0.999905554516238	-4.97269701104273
P43155	CRAT	0.0459952160831645	3.20541679724999	0.845390904490896	0.433783785286524	0.999905554516238	-4.97282871396319
Q5EBL8-2	PDZD11	-0.0346387793270311	3.29141493062124	-0.575930094073473	0.587863258165503	0.999905554516238	-4.97292984015407
P41212	ETV6	0.052793986518377	3.38457152046107	0.916584278347877	0.398488890943339	0.999905554516238	-4.97318211632591
Q13206	DDX10	-0.04937519424423	3.28009464282477	-1.52520760326246	0.183508805014591	0.999905554516238	-4.9734571584468
Q9Y4G6	TLN2	0.0248161954611111	3.12203650855505	0.291213102962839	0.78175816273693	0.999905554516238	-4.97359230183849
Q5VT66-2	MARC1	0.0206125087768277	3.02100724957091	0.241733316878506	0.817911177852447	0.999905554516238	-4.97376921554282
Q9Y3U8	RPL36	-0.0651537670146711	3.26407004335173	-1.25957072798085	0.259580229732569	0.999905554516238	-4.97386738178319
Q96DV4	MRPL38	0.0712311001899621	3.25976901730693	1.18029950900101	0.2873018847845	0.999905554516238	-4.97436682495959
Q6IPR3-1	TYW3	-0.00619317989334732	3.36813531516603	-0.0769601303588217	0.941429420097234	0.999905554516238	-4.97441189778802
P41240	CSK	-0.0348221453135427	3.38072054203353	-1.69322892957487	0.146900236930544	0.999905554516238	-4.97483967650785
Q8IX04	UEVLD	-0.0499201692425029	3.32749730810866	-0.842120974634149	0.435460006105739	0.999905554516238	-4.97487481667366
Q96S38	RPS6KC1	0.0202208762200372	3.33510649905863	0.262578966639421	0.802612363792468	0.999905554516238	-4.97488579749589
P05362	ICAM1	-0.0571877521236543	3.31827846478832	-0.758476857086939	0.479980048148821	0.999905554516238	-4.97496002494478
Q9BUL5-1	PHF23	-0.0125358826029073	3.28412765582172	-0.152537267049309	0.884306941731888	0.999905554516238	-4.97496313121428
Q9H977	WDR54	0.0460987542725935	3.17128371154763	0.78840540931835	0.463687950816499	0.999905554516238	-4.9752036646429
Q9BUL9	RPP25	0.0369631704858965	3.30358392739837	0.592722065255522	0.577348434398739	0.999905554516238	-4.97530493193504
Q5VW38	GPR107	-0.0942985124562187	3.21532968889971	-0.595703008713494	0.57549388228476	0.999905554516238	-4.97566093933375
O75928-1	PIAS2	-0.0402217230269057	3.22830106392117	-0.547471737675927	0.605943130716995	0.999905554516238	-4.97595011531923
P61457	PCBD1	-0.00852184193075411	3.15971216383269	-0.0953662124596179	0.927466829442627	0.999905554516238	-4.97596978056083
P51825-2	AFF1	0.0954008674375321	3.41124895235193	0.61197767776852	0.565433576221714	0.999905554516238	-4.97625781112686
P40429	RPL13A	-0.0625413420066423	3.27988925032436	-1.59840003111657	0.166584702950195	0.999905554516238	-4.97636658003418
Q92913-1	FGF13	-0.0400583831170148	3.2447962629991	-0.543531596736581	0.608471697684519	0.999905554516238	-4.97647458265571
O75064	DENND4B	-0.0695810615584576	3.33958335009801	-0.808395844735203	0.453030467664155	0.999905554516238	-4.97653034768951
O60499	STX10	-0.0169670726854436	3.27726898862106	-0.163150144329339	0.87633885723317	0.999905554516238	-4.9766580843759
Q01974	ROR2	0.00461682447577376	3.25708687445668	0.0492066595344485	0.96252533862954	0.999905554516238	-4.97692382722045
Q01581	HMGCS1	-0.0687164125741751	3.1312456096135	-1.28751856924453	0.250391217781491	0.999905554516238	-4.977179292095
O76024	WFS1	-0.0928837936746269	3.21655976383236	-1.01913174977385	0.351655094698081	0.999905554516238	-4.97729422093586
Q8N490-2	PNKD	0.00675024946582992	3.08012216975805	0.0554876556105226	0.957747361944547	0.999905554516238	-4.97754165659806
Q15024	EXOSC7	-0.0344422672266711	3.2587187864193	-1.161154866734	0.294374942422067	0.999905554516238	-4.97775051457392
Q9NUJ3	TCP11L1	0.0491336449787982	3.38084385505268	0.976372998411403	0.370613222280419	0.999905554516238	-4.97790581272275
P0CG12	CHTF8	0.00662919429157614	3.34371615440967	0.0982451308787594	0.92528540309907	0.999905554516238	-4.97798720605792
O75865-2	TRAPPC6A	-0.0364585226814073	3.41497383184043	-0.638215292953203	0.5494477220267	0.999905554516238	-4.97812421261726
Q86YV9	HPS6	0.0432046238347598	3.35847655876038	0.815563202350121	0.449253289088339	0.999905554516238	-4.97855850528737
P41162	ETV3	-0.00701442111213765	3.31186194997002	-0.0640626735014095	0.951227542641449	0.999905554516238	-4.97860755117897
Q8NG68	TTL	0.0283336301085949	3.1562308410894	0.275479622784361	0.793192950730906	0.999905554516238	-4.97880275971175
P53004	BLVRA	-0.034047978658129	3.39001953268119	-1.48961293481528	0.192324082037674	0.999905554516238	-4.97883230452659
Q96C12	ARMC5	-0.0120065210152803	3.37793257807056	-0.16807883122478	0.872643895360381	0.999905554516238	-4.97885863140493
Q9Y6G9	DYNC1LI1	-0.056909245863429	3.28412960535876	-1.4957391316779	0.190778673771333	0.999905554516238	-4.97898374723054
Q9Y315	DERA	-0.0836565375936262	3.37101666729524	-1.28686452109507	0.250602868414414	0.999905554516238	-4.9792094973796
Q9H2Y7	ZFP106; ZNF106	-0.050373740308304	3.21120223434609	-1.07572443410774	0.327796692479677	0.999905554516238	-4.9796359293316
Q9NS00-1	C1GALT1	-0.0221938121214308	3.32494406976565	-0.280588072276673	0.78947371979694	0.999905554516238	-4.97994145878426
[truncated: 4,723 more rows]
