# Supplementary material for: Thalidomide promotes degradation of SALL4, a transcription factor implicated in Duane Radial Ray syndrome
Source: eLife journal article supplement (doi:10.7554/elife.38430), 2018-08-01
Supplement: supp [file elife-38430-supp-v1.zip › elife_poa_e38430_Figure_1_source_data_8.csv]

	ID	logFC	AveExpr	t	P.Value	adj.P.Val	B
Q9UKT9-1	IKZF3	-1.44016803245158	3.5025147413264	-32.7683297131631	9.8162251621969e-07	0.00659846655402875	0.16228601846761
Q02218	OGDH	0.136954007759514	3.33315476416646	6.99015767470389	0.00118021535256958	0.915639186619765	-0.229533658430078
P40939	HADHA	0.183708454915791	3.32887484744651	6.72166953249118	0.00139880828512333	0.915639186619765	-0.327175304550336
Q9Y5Y6	ST14	-0.186142288626303	3.44931878451238	-6.71262668533775	0.00140697622350175	0.915639186619765	-0.546954644753537
P38646	HSPA9	0.11844165050444	3.28891470446572	5.82761853652411	0.00257378940368991	0.915639186619765	-1.00420770790207
Q9H3S1-1	SEMA4A	-0.526887080608099	3.39782115197777	-5.6667053437313	0.00289520232567217	0.915639186619765	-1.01297745626553
Q13422	IKZF1	-1.06353802782601	3.55672145211551	-12.6966524999459	8.08489098544049e-05	0.181155457347103	-1.11357810932672
P11177	PDHB	0.12233042010101	3.27335407584352	5.45293992347201	0.00339906722968778	0.915639186619765	-1.16587449233239
Q9NSE4	IARS2	0.171293035768304	3.28265282691804	5.34743990343088	0.00368578703826286	0.915639186619765	-1.23987462052107
Q96RQ3	MCCC1	0.188177221458145	3.36485632748205	5.41949046313872	0.00348701524643729	0.915639186619765	-1.27118826160471
Q9NX63	CHCHD3	-0.162965363682864	3.34099133212052	-5.06996936442001	0.00458785509561834	0.915639186619765	-1.49305132529259
P51157-1	RAB28	-1.50472823631341	3.37187886779053	-13.8416232977412	5.43507086894131e-05	0.181155457347103	-1.66689393878325
Q7L2E3-2	DHX30	0.107741781201695	3.23083000233052	4.7461064025656	0.00599206333008428	0.915639186619765	-1.69455016618479
Q9UDR5	AASS	0.111375020659065	3.27457373356893	4.73081431135383	0.00607003606586796	0.915639186619765	-1.75878721372903
Q15306	IRF4	-0.152991815505073	3.41483089015405	-4.57002409092843	0.00696655030397978	0.915639186619765	-1.86408981834557
O76031	CLPX	0.21319435994983	3.27364296089289	4.26772681322493	0.00911024984207014	0.915639186619765	-2.08344859571208
Q9NP81-1	SARS2	0.166122147312493	3.26496866716369	4.6837776701204	0.0063174659994967	0.915639186619765	-2.1476681347022
P10515	DLAT	0.144310857787994	3.25646561286745	4.24746829237502	0.00927968314366883	0.915639186619765	-2.15903437091514
Q99417	MYCBP	-0.172077409051731	3.34185114255373	-4.33349748806261	0.00858459474656305	0.915639186619765	-2.17861998814967
Q5JRX3	PITRM1	0.159806384341396	3.29918731823551	4.11161926999741	0.0105159887476925	0.915639186619765	-2.22016154949392
Q9BW92	TARS2	0.230058104857405	3.27393344275563	4.05518503575983	0.011085425568027	0.915639186619765	-2.30016301953844
P98179	RBM3	0.197579841907235	3.3315539159545	4.05925220092325	0.0110432044666031	0.915639186619765	-2.3450798044336
P23378	GLDC	0.24611193671822	3.3266210938701	3.93646867351106	0.0124048120320421	0.915639186619765	-2.36264512832642
Q10713	PMPCA	0.110942580669295	3.3023624466715	3.93698703852008	0.0123986664424188	0.915639186619765	-2.37365280889542
Q9Y5J7	TIMM9	-0.410221149443828	3.22542940622325	-5.1638418481661	0.00425613303461768	0.915639186619765	-2.41342051543953
A4D1E9-1	GTPBP10	0.158970892951949	3.30154169645476	3.95230929987907	0.012218598972006	0.915639186619765	-2.45223127008238
Q9NUB1	ACSS1	0.127062518982898	3.37332505388096	3.82664639682977	0.0137904743766118	0.915639186619765	-2.45517681740827
Q8NCN5	PDPR	0.158449218128209	3.29539460171832	3.95987268861797	0.0121308361157562	0.915639186619765	-2.46850258873482
O43615	TIMM44	0.146377040155211	3.28695357507077	3.79462503819577	0.0142277798629877	0.915639186619765	-2.48226605447136
O75439	PMPCB	0.136967830246478	3.30881949542378	3.77560595935899	0.0144951234720314	0.915639186619765	-2.49818154167347
Q96CU9	FOXRED1	0.179455144692099	3.34321332985615	3.85943505511516	0.0133587634481873	0.915639186619765	-2.555263382507
Q96N16	JAKMIP1	0.107405175695937	3.44044556830971	3.69915420520823	0.0156301507146537	0.915639186619765	-2.56642362134815
P43897	TSFM	0.199278403616878	3.25610319443733	3.74116000968085	0.0149942776061776	0.915639186619765	-2.58044051974837
O43924	PDE6D	-0.384341493842882	3.343040553824	-5.16302062599813	0.00425890955135974	0.915639186619765	-2.60532194418916
P31949	S100A11	-0.139725330688568	3.39976488573286	-3.59641349840877	0.0173212947202396	0.915639186619765	-2.66090572408779
P08559-4	PDHA1	0.146339672378265	3.28940017424929	3.57708149925177	0.0176626347975931	0.915639186619765	-2.67775691187664
Q92947-1	GCDH	0.156844727477855	3.34200456681602	3.57648907628753	0.017673216942628	0.915639186619765	-2.68707016857406
O00411	POLRMT	0.239627246649026	3.27545653671949	3.55576667724075	0.0180480122180731	0.915639186619765	-2.69233680199194
P48449-1	LSS	-0.0945961958428447	3.34628941616092	-3.56125859425204	0.0179477977157129	0.915639186619765	-2.71983370703717
Q16795	NDUFA9	0.111436546398826	3.30461003429065	3.52019830912559	0.0187128858549008	0.915639186619765	-2.72447916385892
Q96SB8	SMC6	0.0934214372981391	3.23453126174939	3.49255752618175	0.0192490882257102	0.915639186619765	-2.74866419237101
Q9NVV4	MTPAP	0.262972787314909	3.28237541686063	3.53489868562624	0.0184347298852078	0.915639186619765	-2.78717189861856
Q6UB35-1	MTHFD1L	0.263331579946151	3.08393451095926	3.43744018086819	0.0203719601484104	0.915639186619765	-2.79741333043068
A3KMH1	VWA8	0.267768461832351	3.29807593955559	3.43397003242165	0.0204451381106547	0.915639186619765	-2.8019607023148
P23786	CPT2	0.145662020200175	3.31198447277071	3.43583722336213	0.0204057256106924	0.915639186619765	-2.81512364122639
Q96HY7	DHTKD1	0.222350113109181	3.17106916473538	3.7612667345528	0.0147005369140422	0.915639186619765	-2.85464279369801
Q7L0Y3	TRMT10C	0.154270521003709	3.27782667187124	3.42112956567641	0.0207185542322033	0.915639186619765	-2.85939331050841
Q8NE71-1	ABCF1	0.0620152052333915	3.35411214035569	3.51273414860028	0.0188559688575428	0.915639186619765	-2.87138049450501
Q96RP9	GFM1	0.173933548849988	3.30937948088001	3.46481746121687	0.0198050698260236	0.915639186619765	-2.87952061324073
Q5ST30-4	VARS2	0.208185881262742	3.27573416316048	3.5009705663891	0.0190840336197592	0.915639186619765	-2.89086085625063
Q8NC60	NOA1	0.208699315511172	3.27140516549297	3.35820870300191	0.0221205349560121	0.915639186619765	-2.90115753661065
Q8IYQ7	THNSL1	0.208107374368528	3.33741258341869	3.41117856840898	0.0209333340533247	0.915639186619765	-2.90569338777987
P08133-1	ANXA6	-0.0686955844409105	3.38896027418709	-3.97609180196608	0.0119450959004835	0.915639186619765	-2.90653709621946
Q96JP5-1	ZFP91	-0.513268560536196	3.62876984516163	-3.32885897741121	0.0228114964852952	0.915639186619765	-2.90860279084503
O95299	NDUFA10	0.211156212889091	3.31856118958779	3.29976080107311	0.0235210446435081	0.915639186619765	-2.93683782948361
Q7L8L6	FASTKD5	0.19139568048977	3.26105615814544	3.35098346777485	0.0222883820399924	0.915639186619765	-2.93951331814393
Q9NP92	MRPS30	0.250098035977435	3.28186462304534	3.34976650836834	0.0223167962264098	0.915639186619765	-2.9808386843939
P46199	MTIF2	0.215628612396585	3.28305833844788	3.29765347568009	0.0235734042464377	0.915639186619765	-3.00910417878958
Q969Z0-1	TBRG4	0.237356838746058	3.20624322993396	3.2577978310249	0.0245892209183052	0.915639186619765	-3.04472335330862
P36776	LONP1	0.189244330507764	3.34021434607805	3.37274637959362	0.0217871865150344	0.915639186619765	-3.05548258553672
Q9Y6N5	SQRDL; SQOR	0.231039214027231	3.37613666240186	3.20718152348405	0.0259521904804324	0.915639186619765	-3.06308879819165
P14625	HSP90B1	-0.0938058115720917	3.37630167790797	-4.05313082928959	0.0111068217000723	0.915639186619765	-3.0762560429548
Q8TDB6-1	DTX3L	0.275938624168868	3.31291579699703	3.63576217237023	0.01664976980897	0.915639186619765	-3.0953459525644
Q15031	LARS2	0.196240351879647	3.18871229212085	3.07825473888693	0.0298305412905895	0.915639186619765	-3.14033283835892
Q96GJ1	TRMT2B	0.259411240726417	3.28371731350133	3.70308443697345	0.0155693503426445	0.915639186619765	-3.14776743601394
P09001	MRPL3	0.154318777535666	3.30834373098667	3.07925713742142	0.0297979484442751	0.915639186619765	-3.15414706159101
Q8WWK9-1	CKAP2	0.156522276585909	3.32055040678042	3.05538198284735	0.030585354948705	0.915639186619765	-3.18467112608232
Q6P161	MRPL54	0.131414786150222	3.28192876396044	3.02573155980667	0.0315962908651912	0.915639186619765	-3.18671968543839
O95900	TRUB2	0.167752260215872	3.28657361691646	3.08511777402224	0.0296081980355418	0.915639186619765	-3.21286826617005
P82930	MRPS34	0.105044407709461	3.22681392144027	2.99607392125578	0.0326455123784432	0.915639186619765	-3.22018910142024
P82675	MRPS5	0.28249886389994	3.29365496192992	2.9847358162318	0.0330570062313046	0.915639186619765	-3.23704027028904
Q8NI60-1	ADCK3; COQ8A	0.184500186475844	3.31702041841886	2.9275697413327	0.0352231343678422	0.915639186619765	-3.26225709449804
O94925-3	GLS	0.233620978242455	3.27620284910689	3.40633665807525	0.0210387644652758	0.915639186619765	-3.26439920830582
Q9Y2Q5-2	LAMTOR2	-0.131443925821365	3.32353912038915	-2.90914880699011	0.0359549381857999	0.915639186619765	-3.28155156362879
Q9H5V9-1	CXorf56	0.0918607181616097	3.28678181225691	2.90245507187594	0.0362250933483006	0.915639186619765	-3.28330375376804
P42704	LRPPRC	0.271177386111883	3.26471793439212	3.40763508098143	0.0210104321975302	0.915639186619765	-3.29126087814047
Q9H845	ACAD9	0.148094477756138	3.31851415689816	2.96322844099061	0.0338537947108407	0.915639186619765	-3.29671798953387
O60285	NUAK1	-0.237084111469408	3.48679746045098	-3.57969076781424	0.0176161136715392	0.915639186619765	-3.30455311640666
Q9H9J2	MRPL44	0.132795506733002	3.29649432167289	2.88405634219857	0.0369795163374967	0.915639186619765	-3.31268069730688
P11142-1	HSPA8	-0.0392706986789046	3.33920316028594	-3.83903032850805	0.013625545958204	0.915639186619765	-3.31796492641288
P30837	ALDH1B1	0.24871854126687	3.18361258857332	2.88958126253649	0.0367511284231209	0.915639186619765	-3.32146825626668
P83111-1	LACTB	-0.274159844862023	3.3856856123561	-2.85753803886587	0.0380982030729883	0.915639186619765	-3.34700741955304
Q9BWJ5	SF3B5	-0.175463637802699	3.2974067040168	-2.83962587024962	0.0388753726418942	0.915639186619765	-3.35618412625424
P22033	MUT	0.116644934056551	3.27737270446719	2.83118804285699	0.0392476338276561	0.915639186619765	-3.36870650480743
P15924-1	DSP	0.0583553257067995	3.25609297347534	3.11548300759901	0.0286467752628056	0.915639186619765	-3.36917664642038
Q8N4Q1-2	CHCHD4	-0.228680788815542	3.32998325851786	-2.89464244330237	0.0365433041518248	0.915639186619765	-3.37037401558834
Q96EY7-1	PTCD3	0.206061394713385	3.25764081770718	2.79590849729449	0.0408480647019149	0.915639186619765	-3.38092847057358
Q6PI48	DARS2	0.17303446161285	3.21180417339602	2.84559569437178	0.0386143919963765	0.915639186619765	-3.38631392112795
Q9H5Q4	TFB2M	0.201269185455909	3.29959533551483	2.84349393206119	0.0387060486943343	0.915639186619765	-3.39875394456446
O94762-1	RECQL5	0.112843517113009	3.31817518261646	2.79128051923068	0.0410633908524542	0.915639186619765	-3.4007241494158
Q8NBM8	PCYOX1L	-0.186110915220463	3.34918436968863	-2.82794274987832	0.0393918751577747	0.915639186619765	-3.40302704878035
P28331-2	NDUFS1	0.144717427873909	3.28531197625188	2.95600523036749	0.0341262469373252	0.915639186619765	-3.40587657866269
P30038	ALDH4A1	0.215786086774816	3.27570987203752	2.82696510284835	0.0394354446121575	0.915639186619765	-3.41719722475292
Q9Y2Z2-6	MTO1	0.187810704324596	3.25963607696011	3.07120150420895	0.0300610238665111	0.915639186619765	-3.42080160999307
O00231-2	PSMD11	-0.0581081720049358	3.32905319502335	-3.11932557432731	0.0285276607230991	0.915639186619765	-3.42187582955144
Q9Y305-4	ACOT9	0.147991159068588	3.29132292126425	2.75183504014471	0.0429511866789414	0.915639186619765	-3.43204385834344
O15091	KIAA0391	0.301515336252225	3.16367217519651	3.06467569781561	0.0302760730230867	0.915639186619765	-3.44192812287488
Q9NYY8	FASTKD2	0.280429802782835	3.26927586906751	2.72644006498083	0.0442178863208245	0.915639186619765	-3.44450092581298
Q9Y276	BCS1L	0.246391031382885	3.12807053527648	2.77866068720418	0.0416570491169753	0.915639186619765	-3.4534292794802
O95373	IPO7	-0.0711074441658205	3.28970292276544	-2.96157485511302	0.033915948703388	0.915639186619765	-3.45813070955391
Q16537	PPP2R5E	-0.116895885272097	3.3354657832994	-2.71957630373122	0.0445673813382861	0.915639186619765	-3.47142897041956
Q15119-1	PDK2	0.188800424909401	3.3048374713781	2.90356973543439	0.0361799478275215	0.915639186619765	-3.4746259237559
O94925-1	GLS	0.216270471563509	3.34273538470234	2.77364957937545	0.0418954431433946	0.915639186619765	-3.47536646965701
Q8NG31-1	CASC5; KNL1	0.0742020536638105	3.30095138537625	2.74234069831313	0.0434199518445407	0.915639186619765	-3.47922589578931
O95236-1	APOL3	0.197564973867414	3.4404281071784	2.70799341506752	0.0451641887736236	0.915639186619765	-3.48325610003141
Q9NYK5-1	MRPL39	0.116388293710479	3.24377990287927	2.69243992270189	0.0459796639751439	0.915639186619765	-3.48987593797026
Q9NR09	BIRC6	0.0588707645464491	3.33481915618529	2.95197225080773	0.034279444098147	0.915639186619765	-3.50520109658528
Q9H3C7	GGNBP2	0.163865000109031	3.35686648289406	2.91204948557213	0.0358385745187786	0.915639186619765	-3.50890181786968
P35241-5	RDX	-0.181343420036358	3.2649073650203	-2.75093758936034	0.0429952534211834	0.915639186619765	-3.51480062188422
P11021	HSPA5	-0.130514283614844	3.3540982724335	-3.4262560630677	0.020608893493143	0.915639186619765	-3.51586810774928
P17096-3	HMGA1	-0.102501257914597	3.33057684309412	-2.63648733080128	0.0490519406771945	0.915639186619765	-3.52729954337357
P54098	POLG	0.287439388063795	3.23939237274421	2.69890349949565	0.0456387974684614	0.915639186619765	-3.53082046364753
Q68D06	SLFN13	0.143433225882658	3.44673528812228	2.64265085902195	0.0487025548178154	0.915639186619765	-3.54072115100791
Q53R41	FASTKD1	0.276247622816484	3.29948366993566	2.91885535024013	0.0355672137794005	0.915639186619765	-3.55020777356058
Q9Y3B9	RRP15	-0.165097767515448	3.25088335619385	-2.63626868786912	0.0490643857706701	0.915639186619765	-3.55326148114619
Q70CQ2	USP34	0.0706103156435074	3.33027602433	2.73341286012195	0.043865972711732	0.915639186619765	-3.55341852598892
Q5JTZ9	AARS2	0.230930770744106	3.24472479903147	2.59106482471181	0.0517143538902076	0.915639186619765	-3.56935561822907
Q8N442	GUF1	0.265749000131371	3.24172897719267	2.87898734020463	0.0371904644123729	0.915639186619765	-3.57069719904104
Q8N4Q0	ZADH2	0.215616415147164	3.27893856434096	3.04320371120248	0.030996070475418	0.915639186619765	-3.57962023169837
P48735	IDH2	0.120126213293067	3.34599420278222	3.09729010414887	0.0292184618771819	0.915639186619765	-3.5833324214587
Q9Y399	MRPS2	0.118878915222479	3.28093690475411	2.57608435248749	0.0526272906342979	0.915639186619765	-3.59340007720595
Q13596	SNX1	-0.0654170603334689	3.33975524097959	-2.72498053227838	0.0442919469438516	0.915639186619765	-3.60490048708576
O75616-1	ERAL1	0.23556165753365	3.24450049172572	2.55103281436439	0.0541941426651238	0.915639186619765	-3.60549366890953
Q96CB9	NSUN4	0.133738449512625	3.33549266756129	2.58894472178284	0.0518424834156151	0.915639186619765	-3.61298386491987
Q9ULG6-5	CCPG1	0.583139310179887	3.3448302010333	3.93801845391392	0.0123864487985685	0.915639186619765	-3.61711536474021
Q8NEU8-1	APPL2	-0.167018546981311	3.2969577725717	-2.53518620614549	0.055211895218906	0.915639186619765	-3.62125642402381
Q8N806	UBR7	0.113453910169619	3.20917006586175	2.57870634803987	0.052466219975319	0.915639186619765	-3.62897017247999
Q8NDX5-7	PHC3	-0.119110654002171	3.38185527662706	-2.52278632561496	0.0560230209319799	0.915639186619765	-3.6306901554667
Q9BYC8	MRPL32	0.158376658026219	3.25251346773371	2.68856428255439	0.0461854133109719	0.915639186619765	-3.6350585212431
Q13472-1	TOP3A	0.138017203709724	3.24253856789463	2.5160876055335	0.0564666809514774	0.915639186619765	-3.63585704461005
P25440-2	BRD2	-0.0787668911966365	3.21039069614002	-2.61584739792421	0.0502423833176452	0.915639186619765	-3.64540983551416
P18859-2	ATP5J	-0.283141940262992	3.31323030989833	-2.85917041149307	0.0380282511255734	0.915639186619765	-3.64638358422558
Q68CZ2-1	TNS3	0.0544617386968251	3.42059418638092	2.99421263292974	0.0327126647163268	0.915639186619765	-3.66106281728126
Q9NVA1	UQCC; UQCC1	0.134280539655496	3.27296426015218	2.53825913703897	0.0550128950926244	0.915639186619765	-3.67360752757083
Q86YH6-1	PDSS2	0.201235116103718	3.26048895500564	2.60220044352181	0.0510471093344644	0.915639186619765	-3.68419980164474
Q93008-3	USP9X	0.0373353187491151	3.28454808709037	2.87377691213971	0.0374087111955272	0.915639186619765	-3.68825239672868
Q92552-2	MRPS27	0.190081859942859	3.25333753567545	2.47393043427264	0.0593493208947664	0.915639186619765	-3.68829127093835
Q9Y676	MRPS18B	0.210253254480143	3.21677476198787	2.55007881339377	0.0542548230772225	0.915639186619765	-3.68921949575839
Q8NE62	CHDH	0.26814775336805	3.30015639165151	2.65873179909184	0.0478039561100249	0.915639186619765	-3.68972389614447
O75592-1	MYCBP2	0.0318974453608813	3.35529931263434	3.03683993757962	0.0312131759829873	0.915639186619765	-3.69277856387356
P06746	POLB	-0.11246890235302	3.26131819949352	-2.47536082070873	0.0592488967872882	0.915639186619765	-3.69314491887654
Q08116-1	RGS1	-0.141307231071706	3.47015865798308	-2.52050129782947	0.0561739255333618	0.915639186619765	-3.69412217988002
O14657	TOR1B	-0.1068426124321	3.35845301678299	-2.46958530694912	0.0596555332282099	0.915639186619765	-3.69649560894972
P51398-1	DAP3	0.0721316825699287	3.28541682852152	2.47858790517144	0.0590230172655961	0.915639186619765	-3.69917820036669
P05387	RPLP2	-0.0831213055111979	3.32991270644996	-2.75138453960098	0.0429733008930762	0.915639186619765	-3.70114480816351
Q9UDY2	TJP2	0.0660597823099095	3.22695054437427	2.61031242293713	0.0505670561885077	0.915639186619765	-3.70880550944378
P68400	CSNK2A1	-0.0596562325463748	3.27504510560793	-2.60305633218439	0.0509962213351379	0.915639186619765	-3.71808060748748
Q9UG63-2	ABCF2	-0.0619705029460238	3.34431486872373	-2.69858958998286	0.0456552866653521	0.915639186619765	-3.72127812215173
Q6IN84-1	MRM1	0.178436361941299	3.35296304971196	2.65321574363538	0.0481100955570973	0.915639186619765	-3.72416362415533
P62854	RPS26; RPS26P25; LOC101929876	0.102962450519162	3.29521673483918	2.43606620041413	0.0620769709473565	0.915639186619765	-3.73283263697898
Q7Z3D6-2	C14orf159; DGLUCY	0.136592243295295	3.34706740536296	2.41051945163411	0.0639949874849936	0.915639186619765	-3.73632500655727
Q96H35	RBM18	-0.187621245505903	3.30253430893579	-2.73992758691503	0.0435400049202801	0.915639186619765	-3.73785627329801
P49411	TUFM	0.180860096424672	3.29943789785543	2.77559909571623	0.041802517383317	0.915639186619765	-3.73981971221303
Q8WUX9	CHMP7	-0.101199522169848	3.39754927250464	-2.44680190313255	0.0612898570411492	0.915639186619765	-3.74001384197088
Q9NUL7	DDX28	0.280506289211445	3.270879989025	2.43127350220953	0.0624319381096357	0.915639186619765	-3.7411577985419
Q03989	ARID5A	-0.0721141491213371	3.47134752319852	-2.47758808789847	0.0590928978408438	0.915639186619765	-3.74354642764836
Q9BYW2	SETD2	0.0547711861385395	3.27290764673011	2.54469577127179	0.0545986299329554	0.915639186619765	-3.75076670649795
P61758	VBP1	-0.0746397425648846	3.32286225268436	-2.45014850938786	0.0610467396638785	0.915639186619765	-3.75426353726956
P61513	RPL37A	0.0992629108465088	3.3234458980358	2.40927092508461	0.0640903769258574	0.915639186619765	-3.75827496527462
P11310-2	ACADM	0.107809807395329	3.25148056689895	2.57031512996616	0.0529836299563939	0.915639186619765	-3.75873105021512
Q9UHG3	PCYOX1	-0.178310053598222	3.29693155650143	-2.47735425655055	0.0591092542398857	0.915639186619765	-3.75897239733145
Q7Z7L1	SLFN11	0.131435561275714	3.40169545070036	2.44497938134209	0.0614227032520187	0.915639186619765	-3.76566280526838
Q96GW9	MARS2	0.185127313784638	3.30486375879609	2.37973271546142	0.0663931955120731	0.915639186619765	-3.76622049356831
Q3KQU3	MAP7D1	0.102928522342908	3.33638498396052	2.42229673283059	0.063102805147479	0.915639186619765	-3.76737509483597
P62136-1	PPP1CA	-0.126959192119824	3.37680665840983	-2.37062288120148	0.0671215568346908	0.915639186619765	-3.76990324698388
O75127	PTCD1	0.210962216032536	3.22418531818393	2.51163573557369	0.0567636759959327	0.915639186619765	-3.77909137104617
P36873-2	PPP1CC	-0.230314830863774	3.1754487505137	-2.47234383663806	0.0594609315058044	0.915639186619765	-3.78013151898134
Q969S9	GFM2	0.119148912632241	3.28790421666235	2.35472719749492	0.0684134703539789	0.915639186619765	-3.78407538853605
O95461-1	LARGE; LARGE1	0.150069255817326	3.40851943368855	2.49155788715216	0.0581247046313333	0.915639186619765	-3.78601768753047
P62072	TIMM10	-0.23605092565867	3.30531752404965	-2.36113453541524	0.0678894782263846	0.915639186619765	-3.79578448962065
Q08AF3-1	SLFN5	0.0909003405658115	3.38500710580993	2.37785298940197	0.0665427751789582	0.915639186619765	-3.79615137528698
P25774-1	CTSS	-0.206779422231125	3.3566707662612	-2.33222647020214	0.0702888374723772	0.915639186619765	-3.80136128917709
P63098	PPP3R1	-0.219077973156094	3.40538546295186	-2.37307820274439	0.0669243895927784	0.915639186619765	-3.80326115347397
Q9NS86	LANCL2	0.0801539262180092	3.38715050798079	2.41512759865526	0.0636442626660912	0.915639186619765	-3.80960612149998
Q96HN2-2	AHCYL2	-0.105586878681781	3.37460587144466	-2.33224908702332	0.0702869245137488	0.915639186619765	-3.81664525509087
Q96C34-1	RUNDC1	-0.167740211427432	3.25456722203401	-2.36160780066826	0.0678509487851378	0.915639186619765	-3.83093736868301
Q9H4K7	GTPBP5; MTG2	0.124482031826367	3.30426020380645	2.30498859685129	0.0726343403124602	0.915639186619765	-3.83159544038564
P51606-1	RENBP	-0.223579014370609	3.36743766993324	-2.45723889817757	0.060535146606258	0.915639186619765	-3.83350814131459
O14717-1	TRDMT1	-0.204166292281108	3.26088507916147	-2.57987703448472	0.0523944805448375	0.915639186619765	-3.83932813019909
Q8TF72	SHROOM3	0.104305653529865	3.33671025688807	2.29607876551941	0.0734199601893695	0.915639186619765	-3.84264207744015
Q4G0N4	NADK2; NADKD1	0.107938506710123	3.28888404969633	2.28197730834806	0.0746822846525407	0.915639186619765	-3.84451328566127
Q6W2J9-1	BCOR	0.103384030627838	3.2621242612951	2.39430641478787	0.065245895317366	0.915639186619765	-3.84597688234734
O75879	PET112; GATB	0.176739585399257	3.24347626919884	2.50805767051448	0.0570036273105156	0.915639186619765	-3.85585313153098
P49406	MRPL19	0.114103563596111	3.31043176725414	2.27932768669509	0.0749220914170802	0.915639186619765	-3.85645578473463
Q92769	HDAC2	0.0464010699916016	3.27156405275007	2.5107955799668	0.0568199179947418	0.915639186619765	-3.86127902598675
Q96GX9-1	APIP	-0.111777564932059	3.31374766621409	-2.27156611050624	0.0756293829025014	0.915639186619765	-3.86272649005731
Q9C000	NLRP1	0.0996347523722898	3.41807735283033	2.29013779205436	0.073948932282132	0.915639186619765	-3.86512188455675
Q9H4B0	OSGEPL1	0.200732630093542	3.24890627018197	2.55245793407667	0.0541036359915077	0.915639186619765	-3.88004461361467
Q9NW81-4	ATP5SL; DMAC2	0.173761315486719	3.33134964270649	2.31088272770183	0.0721196548292504	0.915639186619765	-3.88173248568192
Q6UWZ7	FAM175A; ABRAXAS1	0.0913697800389182	3.27264471953837	2.2395911191076	0.0786204423423959	0.915639186619765	-3.8830902892965
Q9NXV6	CDKN2AIP	-0.0567822533641614	3.40110627201235	-2.39293680085201	0.0653527875457578	0.915639186619765	-3.88389657010827
P49590	HARS2	0.172538925097292	3.26202435884002	2.39865368498182	0.0649078766144551	0.915639186619765	-3.88790961084858
P52597	HNRNPF	0.0620627373703369	3.38184870859033	2.72223278761272	0.0444317513408898	0.915639186619765	-3.88879403911031
Q7Z6K3	PTAR1	-0.119289022796151	3.3536576152994	-2.22958798933748	0.0795822774735459	0.915639186619765	-3.89029608281285
P35232	PHB	-0.280241105523547	3.33251523751068	-2.51494675586631	0.0565426259850197	0.915639186619765	-3.89913092862995
P07602-3	PSAP	-0.0897731818020805	3.31205799659872	-2.41919610905865	0.0633363609219892	0.915639186619765	-3.90012946710609
Q7Z7H8-2	MRPL10	0.113017581073129	3.29488749684832	2.23746893937561	0.0788234416693874	0.915639186619765	-3.90138348902485
P41212	ETV6	0.131219942274236	3.41594190276341	2.21139301405718	0.0813645427314816	0.915639186619765	-3.90622346521134
P35790	CHKA	-0.215268460958707	3.23530198116427	-2.39887741399431	0.0648905327000044	0.915639186619765	-3.90680203816017
Q14680	MELK	0.101148183974877	3.27780655469942	2.22035252786161	0.080481597323229	0.915639186619765	-3.91506260564747
O43149	ZZEF1	0.0688759151124797	3.3497052588305	2.48184195515462	0.0587962102507734	0.915639186619765	-3.91668105566245
Q53EL6-1	PDCD4	0.122789326705054	3.35516643086607	2.3420874019359	0.0694601449488202	0.915639186619765	-3.91971941046984
O75648-1	TRMU	0.138817617814538	3.2949510651311	2.19255097893836	0.0832556798591163	0.915639186619765	-3.92435279815248
O14656	TOR1A	-0.0801081653433326	3.33693891716293	-2.24569311080376	0.0780398945488695	0.915639186619765	-3.92440169258912
Q8WVM0	TFB1M	0.159347372819759	3.15396076874392	2.25762910842335	0.0769176666605114	0.915639186619765	-3.9296336373279
Q9NZM5	GLTSCR2; NOP53	-0.210953487528851	3.24641791057195	-2.48138640031792	0.05882790451472	0.915639186619765	-3.93087349316071
Q96PY5-3	FMNL2	-0.169445382835906	3.20436268850844	-2.34402405906057	0.0692986472927144	0.915639186619765	-3.93352746717707
Q9H0R6-1	QRSL1	0.179933070040161	3.18089520691113	2.39171320122513	0.0654484461840379	0.915639186619765	-3.94025049854869
Q9BY49-1	PECR	-0.179758653403091	3.28341923827327	-2.1748636125526	0.0850740699224764	0.915639186619765	-3.94030169703213
Q07817-1	BCL2L1	-0.0836340021889526	3.41545359535028	-2.18221268067717	0.0843133934177706	0.915639186619765	-3.9454280746144
Q16763	UBE2S	-0.108420414575393	3.21819830904995	-2.22127734624003	0.0803910487345753	0.915639186619765	-3.9475299950309
Q02108	GUCY1A3	0.175977376862171	3.37716899576455	2.28209650960377	0.0746715158213834	0.915639186619765	-3.95707341744704
Q8IYS2-2	KIAA2013	0.173827924374003	3.38052027780833	2.19394058011135	0.0831146025237357	0.915639186619765	-3.9578018060148
Q8NFD5-3	ARID1B	0.127848742164563	3.25265703097337	2.19754754939058	0.0827496106161282	0.915639186619765	-3.95855508513592
O43809	NUDT21	-0.173668092944054	3.36034651972452	-2.19644438515688	0.0828610569303302	0.915639186619765	-3.95976182889416
Q9BYD2	MRPL9	0.103788027431793	3.31977806253252	2.16857861344498	0.0857304653910464	0.915639186619765	-3.9620310069206
P35637-1	FUS	0.0900652837493601	3.29534311965713	2.39237675891858	0.0653965515248501	0.915639186619765	-3.96868200221429
P11766	ADH5	-0.114955715532923	3.15049218690467	-2.26898645168691	0.0758660613417432	0.915639186619765	-3.97174451491925
Q96SZ6	CDK5RAP1	0.17011716041831	3.19605431391994	2.17465068718116	0.0850962188500978	0.915639186619765	-3.97230286620183
Q5T160	RARS2	0.165392177073747	3.30548273801356	2.20718597326878	0.0817827417551257	0.915639186619765	-3.97415353895656
Q6ZU65-1	UBN2	-0.147121969738197	3.27636703173517	-2.14685411063678	0.0880415804279282	0.915639186619765	-3.9752272885191
Q5JPH6-2	EARS2	0.178179473328103	3.26574054949744	2.13033957866327	0.0898431458909416	0.915639186619765	-3.97653590096395
Q96QD9-1	FYTTD1	-0.275890793531623	3.19171637649343	-2.22538441070643	0.079990255052646	0.915639186619765	-3.97699311191305
Q99797	MIPEP	0.171524080519661	3.16845806454619	2.11966816576466	0.0910282658429025	0.915639186619765	-3.98505766787507
Q9P1Q0	VPS54	0.150395730356902	3.3239700219488	2.22002077810704	0.0805141056430904	0.915639186619765	-3.98772034503253
Q9Y508-1	RNF114	0.110167073633839	3.25091536494122	2.13649759384899	0.0891667918362907	0.915639186619765	-3.99076714361265
P57764	GSDMD	-0.0702914983983464	3.42185087883957	-2.14787750936629	0.0879312201607266	0.915639186619765	-3.99851859484333
P10644	PRKAR1A	-0.0900894071591401	3.38223537603819	-2.35713471081275	0.068216067745697	0.915639186619765	-4.00239412255779
Q5D1E8	ZC3H12A	0.12204803160238	3.37338441512637	2.10458297268799	0.0927321784911321	0.915639186619765	-4.00550044782329
Q6PJG2	ELMSAN1	-0.188181677810947	3.24498571723588	-2.0930898577268	0.0940532219620219	0.915639186619765	-4.00780816307586
P10586-1	PTPRF	-0.381235932946713	2.22034523936628	-2.69121934417229	0.0460443513420136	0.915639186619765	-4.01445600954932
O14734	ACOT8	-0.0815105077398446	3.34919131681865	-2.13072388957998	0.0898007754209802	0.915639186619765	-4.01650941534202
Q9BUB7	TMEM70	0.407654703448028	3.26900834596777	2.07970178981632	0.0956174453298099	0.915639186619765	-4.02130263522714
Q15067-2	ACOX1	-0.20240266162847	3.28710983435016	-2.19115350655882	0.0833978165137251	0.915639186619765	-4.03017898202622
O43805	SSNA1	-0.153031831017228	3.42820887702905	-2.20123070387383	0.0823786914382821	0.915639186619765	-4.03264892197198
P37108	SRP14	-0.0883055900784406	3.35228237877843	-2.21875529844252	0.0806382408821777	0.915639186619765	-4.03508712691874
Q15398	DLGAP5	0.100356959787246	3.24824992669056	2.16368443970282	0.0862453754445613	0.915639186619765	-4.03696998380015
P61457	PCBD1	-0.196109905165043	3.08467693853897	-2.22323470328789	0.0801997673809751	0.915639186619765	-4.03852432250588
P78406	RAE1	0.0426277654131707	3.33088686193487	2.40421533348626	0.0644782284803812	0.915639186619765	-4.04170670772393
Q9NRR5-1	UBQLN4	-0.096462124412725	3.33283002647401	-2.12533594755182	0.0903967570538041	0.915639186619765	-4.04750691361673
Q9H936	SLC25A22	0.276269309969905	3.2384715610758	2.05130840337606	0.0990273020193531	0.915639186619765	-4.0482198301419
Q5T653	MRPL2	0.119834947378832	3.33615112102185	2.04208405204205	0.100162727834059	0.915639186619765	-4.04859738536145
Q96DB5	FAM82B; RMDN1	-0.133856339119051	3.26912473056173	-2.06030759562722	0.097932764045024	0.915639186619765	-4.04873554120345
Q9NVW2	RLIM	0.188704013918305	3.23822084933805	2.1284807263285	0.0900483877625485	0.915639186619765	-4.05678032251184
P32780	GTF2H1	-0.258851058142146	3.28055050677831	-2.11151143604817	0.0919453935742518	0.915639186619765	-4.05792644858274
Q9BWT6	MND1	0.157130597528172	3.28639560750459	2.16209254673706	0.0864135720485949	0.915639186619765	-4.06012112544534
Q04721	NOTCH2	0.16980720444079	3.21086288122868	2.02165793291772	0.10272644001438	0.915639186619765	-4.0653619153628
O75340	PDCD6	-0.199233150223999	3.33138466137382	-2.22174101419395	0.0803456926103604	0.915639186619765	-4.06640662311095
Q96CM3	RPUSD4	0.195208996805305	3.31187250973403	2.13111462485749	0.0897577186050995	0.915639186619765	-4.06653101999848
Q15382	RHEB	-0.103812793343182	3.28895235089716	-2.04573127974411	0.0997121463074916	0.915639186619765	-4.06757191568237
P16401	HIST1H1B	0.476645721147242	3.39635871944728	2.05729685828854	0.0982975099290028	0.915639186619765	-4.06950813680472
Q16690	DUSP5	0.310996885811756	3.3687769274776	2.11862879012377	0.0911445853473606	0.915639186619765	-4.07036127649614
P49773	HINT1	-0.161480833853156	3.34061613293689	-2.35007771186163	0.0687964696008486	0.915639186619765	-4.07205549224594
Q99623	PHB2	-0.283202553116199	3.28860000621229	-2.31996053629528	0.0713347116013928	0.915639186619765	-4.07335457687398
Q38SD2	LRRK1	0.099178784738014	3.36127866420757	2.05511182799084	0.0985631272633048	0.915639186619765	-4.07357177034437
Q9H078-2	CLPB	-0.165391656280891	3.25836949034607	-2.1865461341565	0.0838682858577905	0.915639186619765	-4.07512403346468
Q9UBW8	COPS7A	-0.153927951843554	3.23686017718654	-2.00845736426459	0.104420182439055	0.915639186619765	-4.0786477069932
Q12849	GRSF1	0.0945867653101648	3.21205733149665	2.2308789236225	0.0794574378584844	0.915639186619765	-4.07967014168297
P50452	SERPINB8	0.411407180676618	3.44112995735978	2.03817959893568	0.100647483825773	0.915639186619765	-4.07970466391235
Q9Y6G5	COMMD10	-0.130032360737062	3.3327836258261	-2.0392807698839	0.100510516734209	0.915639186619765	-4.08272153747148
Q9Y291	MRPS33	0.166375015182927	3.24389872415796	2.01440262354198	0.103653726336262	0.915639186619765	-4.08441538052557
Q9H2F5-2	EPC1	0.108150363829171	3.37278014167689	2.00399416284433	0.104999512211433	0.915639186619765	-4.08455810900467
Q9UMY1-1	NOL7	-0.113497428851248	3.23180650495532	-1.99815047599356	0.105763173117022	0.915639186619765	-4.08542180380383
Q70EK8	USP53	0.123629377137294	3.33183616480838	2.02810714370939	0.10190955558601	0.915639186619765	-4.09131968185325
Q9UI95	MAD2L2	-0.124680592996325	3.33499954619875	-2.00349805293582	0.105064117549065	0.915639186619765	-4.09209732829134
Q96EL3	MRPL53	0.140042219312757	3.26787702832322	1.9906868199947	0.106747077488125	0.915639186619765	-4.09841908469324
P50238	CRIP1	0.119001735298124	3.44691097296632	2.00737267933619	0.104560664407902	0.915639186619765	-4.09903216423312
Q9Y3T9	NOC2L	-0.102075318373421	3.26355553213642	-2.14012730906449	0.088770686542717	0.915639186619765	-4.10057682572579
P68431	HIST1H3F; HIST1H3C; HIST1H3D; HIST1H3G; HIST1H3H; HIST1H3B; HIST1H3A; HIST1H3E; HIST1H3I; HIST1H3J	-0.34674998206411	3.12449245113568	-1.99814998030242	0.105763238143019	0.915639186619765	-4.10135033591822
O43298	ZBTB43	-0.548288426666762	3.13932910163103	-2.07347388212473	0.0963545262136396	0.915639186619765	-4.10363904355731
Q96GY0	ZC2HC1A	0.165708921846618	3.3238317898046	2.05713022258261	0.0983177397176848	0.915639186619765	-4.10475980065464
P10606	COX5B	0.268604536198602	3.24165683380719	1.97325705808459	0.109082586018145	0.915639186619765	-4.10594555739493
P11717	IGF2R	-0.0358341996761814	3.3413632777436	-2.62428938995457	0.0497516395210987	0.915639186619765	-4.10805680528859
Q9Y6R9	CCDC61	-0.291415497150808	3.44093516445756	-2.60462107466683	0.050903332995775	0.915639186619765	-4.11047519821789
Q00577	PURA	-0.126729456822778	3.32463101746275	-2.10414519200844	0.0927821332285645	0.915639186619765	-4.11590891432791
Q14814-1	MEF2D	-0.0776424701074801	3.41033357626775	-2.00063007984078	0.10543842059732	0.915639186619765	-4.11834434370983
P09601	HMOX1	0.299674039722401	2.33198840586745	2.22601616916155	0.0799287958117489	0.915639186619765	-4.11865337027789
Q9H7Z7	PTGES2	-0.18619212130061	3.29209659063965	-2.13742050720793	0.0890658964128311	0.915639186619765	-4.11874130452475
Q5T011	SZT2	0.0946988262469963	3.35292013296294	1.97862558764572	0.108357538135304	0.915639186619765	-4.12029815193522
Q9BW66-3	CINP	-0.152230540286313	3.38647773895165	-1.97293518993807	0.109126218125911	0.915639186619765	-4.1205233753296
Q8WWC4	C2orf47; MAIP1	0.147251230041121	3.22912860848095	1.95307532863657	0.111854264682189	0.915639186619765	-4.12300319710364
Q13542	EIF4EBP2	-0.169771704520918	3.37947900445845	-1.96518545977331	0.110182332239663	0.915639186619765	-4.12496700270568
Q5TAX3	ZCCHC11	0.0648595169299314	3.24928462922986	2.07569753495129	0.0960906615691428	0.915639186619765	-4.12536404749162
Q9NSI6-2	BRWD1	-0.101871173003741	3.32750380803344	-1.93660474336138	0.114171117612645	0.915639186619765	-4.13476836334907
O75312	ZNF259; ZPR1	-0.110157091167298	3.31684215024115	-2.16485972089299	0.0861214230369646	0.915639186619765	-4.13620648883689
Q9H9P8-1	L2HGDH	0.0858463619913743	3.24709053587138	2.00647486420992	0.104677095315767	0.915639186619765	-4.13691747709695
Q96BR5	SELRC1; COA7	-0.130658375054887	3.24795306331142	-2.09756932697755	0.0935359677763063	0.915639186619765	-4.13734311447963
O15417-1	TNRC18	-0.186765492933974	3.27293373932542	-2.07762014440142	0.0958631400575569	0.915639186619765	-4.1382632489899
Q96EV2	RBM33	0.0782757220235582	3.36922872909242	2.12669412300826	0.0902461256775426	0.915639186619765	-4.13875681366459
Q9H0L4	CSTF2T	0.0877823621983185	3.35201591092611	2.02257774274033	0.102609510017998	0.915639186619765	-4.1428724196124
A2RUC4	TYW5	-0.179676062600604	3.36703733008022	-1.93260408950528	0.114741442065177	0.915639186619765	-4.14324130115116
Q9NV31	IMP3	-0.083177590513734	3.30302701642849	-1.98327503659906	0.107733711243266	0.915639186619765	-4.14367003015811
Q7LBR1	CHMP1B	-0.0885495324250873	3.35619008484738	-1.95348010931548	0.111797951516265	0.915639186619765	-4.14544345995584
Q8TEY7-1	USP33	0.110234149816604	3.18465091510191	1.9248604245958	0.115853865133371	0.915639186619765	-4.14569522204696
Q96BK5	PINX1	-0.157152976669699	3.34599684595297	-1.92732014644864	0.115499291705338	0.915639186619765	-4.15693038125157
Q9Y6M9	NDUFB9	0.332430291858596	3.26156792789528	1.93847036015188	0.11390617686259	0.915639186619765	-4.15865012621092
O60307	MAST3	0.243531256729865	3.40652446115853	1.89935206500021	0.119598833990358	0.915639186619765	-4.16338737654657
Q2TB10	ZNF800	-0.434181536516959	3.21408400823364	-1.90438024136166	0.118850737281347	0.915639186619765	-4.16596973039799
Q9UBW7	ZMYM2	0.0770585231059875	3.20276264277634	2.04561063860609	0.0997270159415526	0.915639186619765	-4.16677369116238
Q96BT3-1	CENPT	-0.132816152582207	3.27552782751968	-1.89373892762755	0.120439774061329	0.915639186619765	-4.16730685869086
P38159-1	RBMX	-0.0699181813211227	3.24713667548384	-2.11814819520557	0.0911984238600498	0.915639186619765	-4.16899074498645
P42357	HAL	-0.941474897984905	3.18788732921887	-1.89462855876278	0.12030608217374	0.915639186619765	-4.1721813946485
Q99583	MNT	-0.145092176000392	3.35473322923492	-1.90415622290224	0.118883962677321	0.915639186619765	-4.17317324369405
Q9UHA3	RSL24D1	-0.0789118033295203	3.29985381320575	-1.90659271123959	0.118523114595476	0.915639186619765	-4.18069913046029
Q96DV4	MRPL38	0.114393228241751	3.27703386852765	1.99226637740967	0.106538047182671	0.915639186619765	-4.18187069209802
Q9H857-2	NT5DC2	0.176050776021538	2.76278869312838	2.00723255172761	0.104578827481768	0.915639186619765	-4.18473086361872
Q8WX94-3	NLRP7	0.19891484223368	3.45633750231048	1.92653698989057	0.115612061613685	0.915639186619765	-4.18844501424421
P14923	JUP	0.13111603843274	3.25399980945142	2.02783075307007	0.101944422826444	0.915639186619765	-4.18858276693697
P48382	RFX5	-0.0714906176416816	3.35738514832068	-1.98642077346284	0.107313790129989	0.915639186619765	-4.1887454832387
Q9BX63	BRIP1	0.202931043777478	3.26303644046701	1.88987473524983	0.121022278422876	0.915639186619765	-4.1904517330993
Q9BYN0	SRXN1	-0.168240730269907	3.26774915693396	-1.93825058316918	0.113937354372867	0.915639186619765	-4.19213396259322
Q9NYP9	MIS18A	-0.15931976617049	3.26145729787581	-1.86207231262833	0.125300842851009	0.915639186619765	-4.19255914752909
Q3ZCW2	LGALSL	-0.226667553681812	3.21569781737579	-1.93006064870962	0.11510558229332	0.915639186619765	-4.19483280781208
O95159	ZFPL1	0.111546781616057	3.31805873139443	1.86985248624833	0.12408790228596	0.915639186619765	-4.19668950267734
Q13151	HNRNPA0	0.0634085065777601	3.2557611522798	2.14108565674261	0.0886664185902034	0.915639186619765	-4.19819627403471
P82914	MRPS15	0.143508113880487	3.26773412131125	1.94642279823003	0.112784049219453	0.915639186619765	-4.20017926919987
Q96BN2	TADA1	-0.205347021363417	3.21859913781048	-1.85166762523667	0.12694223773553	0.915639186619765	-4.20085587995321
Q96DX7	TRIM44	0.16546014438754	3.2685551003229	1.93093002834999	0.11498097853864	0.915639186619765	-4.20133727260697
Q16352	INA	-0.464062889420125	2.19726797036956	-2.0294833387006	0.101736133882614	0.915639186619765	-4.20278116359743
Q96D53-1	ADCK4; COQ8B	0.118327104588251	3.2908475559814	1.85058021528028	0.127115066408538	0.915639186619765	-4.20326042303609
Q9Y6A4	C16orf80; CFAP20	-0.194059278531794	3.22830327923258	-1.91309606023951	0.117565553761832	0.915639186619765	-4.20429730856706
Q9ULC4-3	MCTS1	-0.10530634971423	3.24400876117122	-1.95876690036793	0.111065183165459	0.915639186619765	-4.2043079230588
Q9BT09	CNPY3	-0.119099733132126	3.31743533437197	-2.02957124322759	0.101725067198287	0.915639186619765	-4.20534072155146
Q7Z614-1	SNX20	0.11272732915582	3.42225822121023	1.84936692929592	0.12730818960245	0.915639186619765	-4.20567954969561
Q8N5M4	TTC9C	-0.161972691827267	3.30740033113846	-1.84340648996596	0.128261365277656	0.915639186619765	-4.20903620376971
P61254	RPL26	0.151587016399219	3.37840013249114	2.09427336357333	0.0939162638220949	0.915639186619765	-4.21057414861733
Q8NCM8-2	DYNC2H1	0.111214188983407	2.38321739995519	1.82871845882705	0.130641936408171	0.915639186619765	-4.21753099516712
Q70E73	RAPH1	-0.122179138922003	3.29920520529077	-1.87013516451862	0.124044062938681	0.915639186619765	-4.21843754767883
Q08431	MFGE8	-0.450048913586406	3.26449941273136	-2.01068754799612	0.10413196916388	0.915639186619765	-4.22099072297929
P17900	GM2A	-0.275786505738076	3.33438407620389	-1.97933146301295	0.108262584543137	0.915639186619765	-4.22128654200559
Q96JM7	L3MBTL3	0.0926942124211889	3.20627425203036	1.89394838169572	0.120408283796794	0.915639186619765	-4.22139872812038
Q9UII2-1	ATPIF1	-0.168022738708842	3.19547234067344	-1.88616185504886	0.121584742217744	0.915639186619765	-4.22224689732449
Q9NQV6-6	PRDM10	-0.539197112554616	3.18317824760982	-1.8238110431741	0.131447465270593	0.915639186619765	-4.22471790908257
Q01664	TFAP4	-0.0771042810146152	3.36254292043072	-1.88816175000444	0.121281440419297	0.915639186619765	-4.22562448734735
Q13402-1	MYO7A	0.230955525484569	3.44027190861898	1.87757736526976	0.122895664622786	0.915639186619765	-4.22580981140312
P49750-4	YLPM1	0.0501479390459173	3.21578386878176	2.31609032857779	0.0716682190925739	0.915639186619765	-4.22845671149341
O43464	HTRA2	-0.226722360754846	3.30842347803849	-1.80911266627793	0.133890991547107	0.915639186619765	-4.23203504566439
P53671-3	LIMK2	0.103137060038404	3.33582270385482	1.80813007796663	0.134056005095207	0.915639186619765	-4.23318861962458
Q9UJC3	HOOK1	-0.0644282962422601	3.31743949942185	-2.07070732829858	0.0966838907958033	0.915639186619765	-4.23614220621973
Q6P3S1	DENND1B	0.115042134020368	3.40530156021088	1.82598991807702	0.131089181033201	0.915639186619765	-4.23754095535756
Q6P1Q0-7	LETMD1	0.294764721304127	3.08717892607713	1.83791732395658	0.129145722079747	0.915639186619765	-4.23770177072825
Q9BYG5	PARD6B	-0.102673612108824	2.95958417579426	-1.7991358718174	0.13557625439578	0.915639186619765	-4.23893066074794
Q16881-1	TXNRD1	0.0990707364436913	3.34480626268584	2.20135096529701	0.0823666105367551	0.915639186619765	-4.24141573147137
O95365	ZBTB7A	-0.611221780373178	3.25366519604997	-1.81943884034232	0.132169468079873	0.915639186619765	-4.24734341686015
P10914	IRF1	0.201591876663352	3.3957146207914	1.90200023557989	0.119204225515841	0.915639186619765	-4.24797545772335
Q96M11	HYLS1	0.114822990483071	3.3845820971222	1.79933302312563	0.135542740983552	0.915639186619765	-4.24998013485901
Q5SRD1	TIMM23B; LINC00843; LOC100652748	0.544635300681887	3.26867429046224	1.8002542753665	0.135386252025329	0.915639186619765	-4.25078616261779
O75626-1	PRDM1	-0.267362198458044	3.39921119021065	-1.91863737069932	0.116756030823344	0.915639186619765	-4.25106661540289
O95169	NDUFB8	0.697443049806273	3.21282527362952	1.93899194201349	0.113832221214189	0.915639186619765	-4.25123506106492
Q8TBA6	GOLGA5	0.0660389079213959	3.10621720650413	1.88819133297604	0.121276959826019	0.915639186619765	-4.25274579387808
P78345	RPP38	0.182931707929663	3.39231073905164	1.83611450535803	0.129437549798032	0.915639186619765	-4.2531528920157
Q96T88-2	UHRF1	0.139388242039085	3.30753752945466	2.16717549241248	0.0858777473643111	0.915639186619765	-4.25580736001767
Q8TF42	UBASH3B	-0.261578066355196	3.32023946597887	-1.80970246520407	0.13379204280543	0.915639186619765	-4.25774264446904
Q9Y2J2	EPB41L3	0.126380956377659	1.9101826708163	1.77848495443857	0.13913434943277	0.915639186619765	-4.2580400510757
Q86UD0	SAPCD2	-0.225990706008624	3.1575929920668	-1.97874401358887	0.108341601477454	0.915639186619765	-4.2583019892542
Q99828-2	CIB1	-0.349433591235853	3.37459151591981	-1.79810411425876	0.135751780425641	0.915639186619765	-4.25896062619334
Q9NXF1	TEX10	-0.19853779349568	3.25708470082085	-1.96501291007777	0.110205969006464	0.915639186619765	-4.26277040135549
P05771-2	PRKCB	-0.208843035367217	3.38432934520845	-1.83464450040904	0.129676009500204	0.915639186619765	-4.26288133062082
Q9Y2X9	ZNF281	-0.204990663629851	3.22572886648778	-1.82618245191366	0.131057570258772	0.915639186619765	-4.26378528089864
Q9Y697	NFS1	0.0795675918580516	3.28211752688584	1.83415040457522	0.12975626234205	0.915639186619765	-4.26392210471516
Q9Y3C1	NOP16	-0.0685121928849908	3.30119694158842	-2.05732627561495	0.0982939390874847	0.915639186619765	-4.2642360098313
Q8NBZ7-2	UXS1	-0.344163265661855	3.28760052687729	-1.7682582398378	0.140931787359668	0.915639186619765	-4.26560616521191
P00352	ALDH1A1	-0.408640636971507	3.35051135963722	-1.82092566970757	0.131923481906437	0.915639186619765	-4.26630097824964
Q8NEL9-1	DDHD1	-0.126420388379994	3.235099310172	-1.77155529215891	0.140349711041652	0.915639186619765	-4.26747663065041
Q8TF74	WIPF2	-0.267981399555896	2.86019199114277	-1.81562917392612	0.132801917951887	0.915639186619765	-4.26765549080648
Q86XN8-3	MEX3D	0.205957018674804	3.24545331672946	1.94076476782967	0.113581226861407	0.915639186619765	-4.26867206880484
P11047	LAMC1	-0.257926948966587	2.65985712360982	-1.75766407521556	0.142818944188733	0.915639186619765	-4.26907353547055
Q99627-1	COPS8	-0.171231108058358	3.30352044352819	-1.91824758074681	0.116812783528737	0.915639186619765	-4.26930170351816
Q96I59	NARS2	0.156612604721688	3.19992476931606	1.83045894276078	0.130357472704681	0.915639186619765	-4.26961777180292
P49366-1	DHPS	-0.100636425907405	3.32118432779823	-1.96110532732688	0.110742681682992	0.915639186619765	-4.27133099289607
Q8TBC3	SHKBP1	-0.146805530165192	3.26272987298461	-1.81847680110474	0.132328883719512	0.915639186619765	-4.2733018613966
Q9NVS2-2	MRPS18A	0.362504001591125	3.28520874027652	2.46823430660298	0.0597510958137798	0.915639186619765	-4.27488396318433
Q16527	CSRP2	0.31839032604066	1.72190398331278	1.74571720352951	0.144978143748262	0.915639186619765	-4.27761064550965
P16403	HIST1H1C	0.603166817614054	3.43119051978928	1.77362957146319	0.139984773678795	0.915639186619765	-4.2832174915468
Q5BKZ1	ZNF326	0.0700692314355532	3.03035644994439	2.01533966583057	0.103533468082726	0.915639186619765	-4.28348952277978
Q8TB73	NDNF	-0.627097823878445	3.16128255552122	-1.74667707610636	0.144803435138863	0.915639186619765	-4.28487030653074
Q9H211	CDT1	0.185186377963455	3.29621693422206	1.86212010467579	0.125293354486731	0.915639186619765	-4.2894025226346
P42568	MLLT3	0.101826439273378	3.2255746642115	1.72871278020386	0.148109114178998	0.915639186619765	-4.28966099431668
Q9Y5J9	TIMM8B	-0.281979654198811	3.36047607507714	-1.73446451862017	0.147042410563675	0.915639186619765	-4.28974744111633
P28070	PSMB4	-0.0601569114827553	3.33304129551519	-2.09275281739688	0.0940922640629496	0.915639186619765	-4.29042255117237
Q7Z460-4	CLASP1	0.0572243237204448	3.32131170884129	2.2369688201008	0.0788713635997071	0.915639186619765	-4.29126728040976
Q13614-1	MTMR2	0.0924341164821799	3.31239846491352	1.77316722828907	0.140066031345878	0.915639186619765	-4.2913416012864
O75832	PSMD10	-0.079140832953058	3.2975792525931	-2.14038672984144	0.0887424486661659	0.915639186619765	-4.29365283448907
Q8N6N3	C1orf52	-0.158174311988421	3.28654982479435	-1.71837405934759	0.150046390329424	0.915639186619765	-4.29706763877233
Q99470	SDF2	-0.142769168909843	3.34868007549094	-1.7522902601425	0.143786070053065	0.915639186619765	-4.29942166318572
P14649	MYL6B	-0.179012676885852	3.14958775573471	-1.73197644500553	0.147502877310974	0.915639186619765	-4.29999328312314
Q9H0E9-2	BRD8	0.0839765408901306	3.26127980758304	1.88995009355306	0.121010890542622	0.915639186619765	-4.30035797372135
Q15283-1	RASA2	-0.0823136399517001	3.38546012818624	-2.04728163388173	0.0995212667099001	0.915639186619765	-4.30054236650784
Q86YR5-1	GPSM1	0.484632923411531	1.96811922614972	2.63249385888387	0.0492798025129935	0.915639186619765	-4.301300804564
Q8N5P1	ZC3H8	0.148818027585842	3.22516281100322	1.7118695618387	0.151278414726811	0.915639186619765	-4.30211002710164
Q8N490-2	PNKD	0.54657797017721	3.2960532580426	1.73368668235317	0.147186206541945	0.915639186619765	-4.30241073502495
Q93088	BHMT	-0.915813719998636	3.20148273761522	-1.71292302852949	0.15107817991776	0.915639186619765	-4.3024453153857
Q4VC31	CCDC58	-0.206112808921451	3.24571745800268	-1.75664307555835	0.143002179599579	0.915639186619765	-4.30633324147993
Q5JS54-2	PSMG4	-0.181305829528435	3.32618055783816	-1.75237487969909	0.14377078921904	0.915639186619765	-4.30639076615932
Q96FI4	NEIL1	-0.108191175561625	3.40422353244943	-1.70995702976781	0.151642624242479	0.915639186619765	-4.30648260831362
Q5T0D9	TPRG1L	-0.133341630782454	3.38544972967711	-1.76404534255371	0.141679157169922	0.915639186619765	-4.3065221023016
Q9HAB8-1	PPCS	-0.15974438446826	3.35826166883027	-1.8942146076861	0.120368270588717	0.915639186619765	-4.3068027449285
Q8TBF2-3	FAM213B	-0.339216096417368	3.19727152570844	-1.70273154591302	0.153026660802261	0.915639186619765	-4.30796746189283
Q8TBZ3-7	WDR20	-0.236409838223249	3.31641874650171	-1.70091626493769	0.153376389611222	0.915639186619765	-4.309143410345
Q9NUG6	PDRG1	-0.102137599164601	3.29748405117158	-1.69965489551342	0.153619880667871	0.915639186619765	-4.31025321914109
Q15369-1	TCEB1; ELOC	-0.0906183156732638	3.34361554879733	-1.99919080822751	0.105626792786021	0.915639186619765	-4.31032445913199
P98082	DAB2	-0.129661354908623	3.29857726222951	-1.69846771668186	0.153849408706917	0.915639186619765	-4.31084176483961
Q9BUT9-1	FAM195A; MCRIP2	-0.134394960758991	3.39008404791951	-1.71947398181317	0.149839064652286	0.915639186619765	-4.311434342798
Q56VL3	OCIAD2	0.809070003086642	3.31721407502567	1.73886336033584	0.146231906430701	0.915639186619765	-4.31176651777981
Q13115-1	DUSP4	0.17866123853508	3.33649652365891	1.81842493095768	0.132337484555713	0.915639186619765	-4.31197766902956
Q96CX6	LRRC58	0.348774100658812	3.52284486692659	1.69650620954211	0.154229407661314	0.915639186619765	-4.31197789518023
Q6ZNJ1-1	NBEAL2	0.0455985922303311	3.41975304459339	2.19267954151503	0.0832426168977718	0.915639186619765	-4.31218557801198
Q9NRV9	HEBP1	-0.147574679315504	3.35729444745202	-1.82034461218794	0.132019557686856	0.915639186619765	-4.31221096455628
Q96RF0-2	SNX18	-0.135906488936554	3.37396046685759	-1.86615956045981	0.124662105174501	0.915639186619765	-4.31540295235127
Q9P1U1-1	ACTR3B	-0.109487257266768	3.20032872199065	-1.70184544402372	0.153197274319492	0.915639186619765	-4.31826617928688
Q9BRQ6	CHCHD6	-0.184634975861835	3.1503575028873	-1.69064700126743	0.15537018100895	0.915639186619765	-4.31830626671806
P56182	RRP1	-0.167836110441363	3.28680756042981	-2.06608022637708	0.0972374399274042	0.915639186619765	-4.32178723527921
Q9NVH6-8	TMLHE	0.162046861050274	3.19577495381174	1.737221390625	0.146533910901094	0.915639186619765	-4.32245442455929
Q96HP4	OXNAD1	0.106322274175426	3.27747931482656	1.69842778350483	0.153857135399215	0.915639186619765	-4.32299693658264
P27987	ITPKB	-0.099199177769012	3.38726842669862	-1.74103829752098	0.14583285288206	0.915639186619765	-4.32332569695731
P40616	ARL1	0.204606802775862	3.38386482123436	1.81158657466995	0.133476456962144	0.915639186619765	-4.32419458512982
Q9UK59	DBR1	0.0527117410101161	3.31881940927745	1.92211709179873	0.116250667167656	0.915639186619765	-4.32465478237399
Q9BT40	INPP5K	0.0943236653705859	3.35228483450818	1.7349221394216	0.146957878755587	0.915639186619765	-4.32523057568775
Q969Y2-2	GTPBP3	0.101479241905932	3.31516153183497	1.70387456534914	0.152806864411773	0.915639186619765	-4.32560277065775
P13473-3	LAMP2	-0.202191871560717	3.27403629674753	-1.76461193785276	0.141578406799384	0.915639186619765	-4.32640403425493
P10909-2	CLU	-0.679205640937735	3.22027764027638	-1.87113160635816	0.123889657582339	0.915639186619765	-4.3280860910852
Q9NXF7	DCAF16	0.164037039196699	3.29130483638287	1.73211530401648	0.147477139999214	0.915639186619765	-4.32838315870289
Q9UL03	INTS6	-0.144295532928011	3.2808721833794	-1.76000588561835	0.142399575274278	0.915639186619765	-4.32864388619745
Q8IZL2	MAML2	0.0771535846087059	3.42630891016456	1.76473086713958	0.141557268461302	0.915639186619765	-4.32914493376488
P07858	CTSB	0.0759858268813273	3.36719975767282	2.07676264873327	0.0959645450614169	0.915639186619765	-4.32927309908506
O14733-3	MAP2K7	0.0599859169987194	3.38916075487377	1.94925944030534	0.112386599397376	0.915639186619765	-4.33102577478815
O60427	FADS1	0.258897236119526	3.11657914182736	1.66436128317038	0.160594043616729	0.915639186619765	-4.33386202517153
Q9NYB9	ABI2	-0.149400684497568	3.08993350431964	-1.68080824481343	0.157305036357892	0.915639186619765	-4.33472021956644
Q15050	RRS1	-0.192135158215099	3.22872213237535	-1.80443979285903	0.134677618997242	0.915639186619765	-4.33478041870856
Q9H2A2-1	ALDH8A1	-0.402697927408561	3.17959564011459	-1.71859916510376	0.150003936118198	0.915639186619765	-4.33548685413748
Q96AK3	APOBEC3D	0.135655886141063	3.45444402011397	1.65984869032448	0.1615085411403	0.915639186619765	-4.33676681914426
Q96S44	TP53RK	-0.119918605750434	3.27475952872122	-1.66393202788271	0.160680808798244	0.915639186619765	-4.33829442023574
A6NFQ2	FAM115C; TCAF2	0.145726298649024	3.42421510755715	1.83413702285339	0.129758436565195	0.915639186619765	-4.33899873564784
Q86V88	MDP1	-0.326737628286651	3.20681923004594	-1.67356870704323	0.158744301158337	0.915639186619765	-4.34030470742367
P07199	CENPB	-0.11915701284951	3.21560038198343	-1.67470732910522	0.15851705644236	0.915639186619765	-4.34131431811046
Q96JJ3	ELMO2	-0.0716904076615819	3.23971630868171	-1.75095102476878	0.144028134358706	0.915639186619765	-4.34536593275254
Q15493-1	RGN	-0.915038438669981	3.15891131570383	-1.67435493762268	0.158587351110223	0.915639186619765	-4.34583573982307
P02649	APOE	-0.586283432830414	3.27613785470094	-1.72817637159618	0.14820899683968	0.915639186619765	-4.34589569004134
P42575-1	CASP2	0.0878298005734838	3.41013820352323	1.82219403562537	0.131714013142593	0.915639186619765	-4.34646705140009
Q8N5C7-1	DTWD1	-0.197370659375299	3.54364389061495	-1.7997470004447	0.135472397473794	0.915639186619765	-4.34749673857393
O95625	ZBTB11	-0.403453826659948	3.18891970329564	-1.64307789720561	0.164953467535234	0.915639186619765	-4.34884907891354
Q9UHV7	MED13	0.0819169798432405	3.30539165723715	1.71169806247498	0.151311037544945	0.915639186619765	-4.34897812493811
P12259	F5	-0.675992023046692	3.29164591659243	-1.93499283038638	0.114400549899021	0.915639186619765	-4.34901174035225
Q9H307	PNN	-0.0370455409659822	3.24887912118826	-2.27037985083672	0.0757381202084698	0.915639186619765	-4.34915756500218
P49888	SULT1E1	-0.876080168829553	3.13211460697879	-1.64471541234653	0.164613867628539	0.915639186619765	-4.34924516323849
O75962-1	TRIO	0.119716271298955	3.33447374013136	1.73189868361431	0.147517292271551	0.915639186619765	-4.34961830796987
Q96RE7	NACC1	0.0722156532959948	3.38882508299929	1.86436245864543	0.124942530557178	0.915639186619765	-4.34990708273016
P23109	AMPD1	0.195201696243162	3.4774325487163	1.72604195012258	0.148607120507786	0.915639186619765	-4.35014670900283
Q9HCS7	XAB2	0.0702784387563818	3.35224075191198	2.05151000844706	0.0990026396601204	0.915639186619765	-4.35134819434687
Q5HYI8	RABL3	-0.147273180564243	3.32076145847246	-1.81487993436713	0.132926668085243	0.915639186619765	-4.3535977618662
Q8IYA6	CKAP2L	0.319181564260835	3.45781947084108	1.72884336212461	0.148084809395614	0.915639186619765	-4.35551891507317
Q8WUD4	CCDC12	-0.0646033616558161	3.31783800067333	-1.74459343248082	0.145182957820464	0.915639186619765	-4.35579432591861
Q15468-2	STIL	0.156362865033235	3.35739860623029	1.65867914072451	0.161746411800728	0.915639186619765	-4.35622679640971
O94992	HEXIM1	0.0918430140779318	3.22640762370074	1.8341017934137	0.129764160722243	0.915639186619765	-4.35739027966177
Q9NQ86	TRIM36	-0.268142649807751	3.24523341857428	-1.66463345557612	0.160539054030712	0.915639186619765	-4.35788586774179
Q9Y3D6	FIS1	-0.124437290629199	3.31076797756698	-1.63875259422528	0.165853872854505	0.915639186619765	-4.35928429654367
Q9H788	SH2D4A	-0.0739215316822738	3.38712355479022	-1.70582259273184	0.152433008284315	0.915639186619765	-4.35944561233605
P20839-6	IMPDH1	-0.0744264039952605	3.35974774881657	-2.03779103528363	0.100695861857239	0.915639186619765	-4.35974949860247
O15061-1	SYNM	-0.142528341914218	3.30697252653628	-1.70879568262066	0.151864218278988	0.915639186619765	-4.36060142456003
Q9BVC3	DSCC1	0.113990049229715	3.29760491277454	1.84938625452759	0.12730511114913	0.915639186619765	-4.36165573061928
Q96DX4	RSPRY1	0.183330006304409	3.33316764449021	1.62203201364529	0.16938129401625	0.915639186619765	-4.36183896058032
Q9GZQ3	COMMD5	-0.150697280845228	3.35157291939469	-1.67883795946623	0.157695428661942	0.915639186619765	-4.36290918394509
P54259	ATN1	-0.247147475689377	3.32000366413743	-1.8341988932527	0.129748384359136	0.915639186619765	-4.36376231968914
Q9UQR0	SCML2	0.0595811283276825	3.20232037874524	1.82234528600859	0.131689057321303	0.915639186619765	-4.3639904715727
P06241-1	FYN	0.322762623156248	3.18480514874576	1.74310131967436	0.14545536165622	0.915639186619765	-4.36428880347304
Q9NSY0-3	NRBP2	-0.248717869446151	3.29697891210304	-1.65861297620225	0.161759879329854	0.915639186619765	-4.3642909538406
Q9Y2F5	KIAA0947; ICE1	0.0912470790413776	3.33844113954551	1.63669504978121	0.166283927656503	0.915639186619765	-4.36456830919922
Q9UG56-3	PISD	-0.0983841341956758	3.25263809624773	-1.63159590614385	0.167354552357831	0.915639186619765	-4.36589441775141
Q9H9D4	ZNF408	-0.508563770265576	3.25487990776401	-1.76066900250806	0.142281054398825	0.915639186619765	-4.36729253286001
Q9H4B7	TUBB1	-0.518943463624109	3.30182094191167	-1.6162446158899	0.170619665697755	0.915639186619765	-4.37169620393128
Q1ED39	C16orf88; KNOP1	-0.192289898407504	3.08793673955919	-1.84468401649244	0.128056445660855	0.915639186619765	-4.37249079708517
Q14195-2	DPYSL3	-0.0990230516373621	3.09622928537282	-1.61466117573434	0.170960062735365	0.915639186619765	-4.37310834860113
Q9NZE8	MRPL35	0.163550059160388	3.33061029282473	1.60681976514982	0.172655794574948	0.915639186619765	-4.3738879064323
Q969J3-1	LOH12CR1; BORCS5	-0.143953284853629	3.34692868367978	-1.73729377319674	0.146520584295042	0.915639186619765	-4.37590540791518
Q9Y2K7	KDM2A	0.0539148996435671	3.37646852620173	2.03093256768543	0.101553846969118	0.915639186619765	-4.37659977410652
Q96IK1	BOD1	-0.154066525941748	2.72176557946627	-1.59909476611742	0.174342788510268	0.915639186619765	-4.37925564338085
P16035	TIMP2	-0.107077654909021	3.40221095583459	-1.67027290909856	0.159403930166397	0.915639186619765	-4.37943956161619
Q8WYN0	ATG4A	-0.112297275631087	3.32632691067384	-1.63193726850111	0.167282663662411	0.915639186619765	-4.379901493957
Q7L590-1	MCM10	-0.285174040864486	3.03763428303326	-1.70428246728807	0.152728504772934	0.915639186619765	-4.380290210604
O75569-1	PRKRA	-0.0747133502564217	3.32122312124948	-1.78511951624357	0.137980876277708	0.915639186619765	-4.38034676889144
Q6P4E1-4	CASC4	0.0931953157482829	3.36284738352778	1.82115643319414	0.13188534604409	0.915639186619765	-4.38161419398404
Q9BRJ7-1	NUDT16L1	-0.163215311618693	3.34831938216111	-1.61295262292803	0.171328118005398	0.915639186619765	-4.38307773271856
Q8WUH6	C12orf23; TMEM263	-0.213996138430777	3.17024385219803	-1.78603747496548	0.13782205772896	0.915639186619765	-4.38341809438713
Q9BQE9-1	BCL7B	0.0988789746143149	3.38763459628697	1.59607875862206	0.175005885086469	0.915639186619765	-4.3839744894111
Q8IVH4	MMAA	0.0970696269249523	3.33708524283007	1.59260778980951	0.175772122954097	0.915639186619765	-4.384269461224
P43034	PAFAH1B1	-0.0867181759009909	3.33198717074571	-2.10095195113539	0.0931473816952315	0.915639186619765	-4.38453895483962
Q96F10	SAT2	-0.255785473481377	3.29475388920791	-1.63308423804744	0.16704134632448	0.915639186619765	-4.38506463114212
P17947-2	SPI1	-0.230530567486466	3.35026559105994	-1.59505803146691	0.175230870545263	0.915639186619765	-4.38568427905937
P42694	HELZ	0.0516232698389204	3.32500017610558	1.91163544193581	0.117779910142756	0.915639186619765	-4.3861911154099
Q96F45	ZNF503	-0.645620558612171	1.51071724588225	-1.63871304547562	0.165862128536726	0.915639186619765	-4.38658510831425
Q9UQ90	SPG7	0.268478883875131	3.28339192083986	1.63894287482934	0.16581415812567	0.915639186619765	-4.38728754600454
Q9NXR5	ANKRD10	0.0709794472670424	3.43216046338857	1.74616528398779	0.144896560785025	0.915639186619765	-4.38809303229604
Q9H9V9	JMJD4	-0.135915833017082	3.26066408493531	-1.58344981553761	0.177809886683013	0.915639186619765	-4.39030332600999
Q9Y2H2-1	INPP5F	0.122853095029944	3.23551403913086	1.58525429874418	0.177406514170461	0.915639186619765	-4.39168382137969
O94811	TPPP	-0.126321177333772	3.35144854784456	-1.57877571986588	0.178858977884825	0.915639186619765	-4.39182622468011
Q2TAK8-1	MUM1	-0.166751256996937	3.26381441303657	-1.58253447969516	0.178014848806293	0.915639186619765	-4.39290739476141
Q6AI08	HEATR6	0.160628384132228	3.02726890763946	1.60078133905297	0.173973073847776	0.915639186619765	-4.39297984660115
Q9NWU2	GID8	-0.09992761281561	3.31047581217822	-1.66137656117667	0.161198324263058	0.915639186619765	-4.39323952248845
Q9UDX5	MTFP1	0.517136330068595	3.22165494220803	1.57766234864783	0.179109778166078	0.915639186619765	-4.39370825077459
Q9NZR1	TMOD2	-0.580582195788237	3.18537538776616	-1.64385383392193	0.164792460318695	0.915639186619765	-4.39373374982796
Q96A26	FAM162A	0.407779283250387	3.1748098987998	1.61008850857753	0.171946882674732	0.915639186619765	-4.39373985119772
Q8WUM4	PDCD6IP	-0.058385263475518	3.3411666694573	-2.40927589113232	0.064089997203219	0.915639186619765	-4.39400405881876
Q96L58	B3GALT6	0.150194969123997	3.20056550206679	1.57480638417886	0.179754718056174	0.915639186619765	-4.39406700545904
Q7Z6B0-1	CCDC91	-0.141628478891075	3.27641974060564	-1.67839417600054	0.157783495112713	0.915639186619765	-4.3945646120817
Q8N9N7	LRRC57	-0.146446139769721	3.35098016793082	-1.81676508190055	0.13261301724222	0.915639186619765	-4.39458118076826
Q13492-1	PICALM	-0.086959706840595	3.34042524301236	-1.93428726585844	0.114501128844971	0.915639186619765	-4.39460882589408
P11279	LAMP1	-0.134230435997055	3.36586098846673	-1.70779203897233	0.152055986473033	0.915639186619765	-4.39486892490967
Q8WUW1-2	BRK1	-0.0839749716670768	3.34233026052978	-1.70067203208342	0.153423504992598	0.915639186619765	-4.39595471651133
Q8WVB6-2	CHTF18	0.0917621066901318	3.29681589799658	1.73301023072981	0.147311376570567	0.915639186619765	-4.39660540103558
Q8N4C8-1	MINK1	-0.0647458910328265	3.35919762814024	-1.7198300259429	0.149772016000186	0.915639186619765	-4.39673718049334
Q9UKU7	ACAD8	0.0994114637950869	3.33265825237206	1.71111413743437	0.151422166150921	0.915639186619765	-4.39736423122716
Q9NYA4	MTMR4	0.207037854785601	3.34003248213673	1.60681406520911	0.172657033303347	0.915639186619765	-4.3977105033234
Q9BUE6-2	ISCA1	0.130466712330042	3.29560520149229	1.64655790355258	0.164232599211819	0.915639186619765	-4.39859037429082
O95219	SNX4	-0.121271748418435	3.17932545992791	-1.72820491275237	0.148203680566654	0.915639186619765	-4.39874699577086
Q8N8Q8-1	COX18	0.568960563381376	3.24763467547696	1.56236500203672	0.182591265390167	0.915639186619765	-4.39897934965638
Q9UGP5	POLL	0.072198051510078	3.35147335492064	1.63613757572882	0.166400640119602	0.915639186619765	-4.40013866873435
Q9NPA3	MID1IP1	0.18580819407436	3.14345274002536	1.56150823297856	0.182788228693807	0.915639186619765	-4.40019018759704
Q8IVH8	MAP4K3	-0.262112244975119	3.19028521426635	-1.56034526458306	0.183055921313733	0.915639186619765	-4.40066920506657
P98173-1	FAM3A	0.16284269346395	3.25925662964347	1.63058866143844	0.167566852347009	0.915639186619765	-4.40106538523759
Q02083	NAAA	0.16282898164285	3.44120860232748	1.61504348202895	0.170877814970961	0.915639186619765	-4.40177616775115
P49407-1	ARRB1	-0.70935926519809	1.93086585544552	-1.61969810423375	0.169879610671903	0.915639186619765	-4.40197437549372
Q9H300	PARL	0.596002762698327	3.25794104755801	1.55722478760826	0.183776114829805	0.915639186619765	-4.4022231699049
Q9NWR8	CCDC109B; MCUB	0.31722559187487	3.3134623849427	1.55915646623667	0.183329960943857	0.915639186619765	-4.40304170904303
P32019-1	INPP5B	0.0978465007023718	3.3307228836175	1.71039931270172	0.151558319712383	0.915639186619765	-4.40361199644607
Q9H582-1	ZNF644	-0.330285823269153	3.19595735057448	-1.62748069893297	0.168223631995272	0.915639186619765	-4.40398953052829
O00292-1	LEFTY2	-0.381947091444923	3.26386590260123	-1.55330089611794	0.184685716340561	0.915639186619765	-4.40441986202784
Q9P270	SLAIN2	0.072014071773782	3.38459538750189	1.70750103813093	0.152111634610026	0.915639186619765	-4.40570535476208
Q9UBR2	CTSZ	0.188127793955678	3.40662388584514	1.55201218102138	0.184985425585006	0.915639186619765	-4.40584949630975
Q9H5H4	ZNF768	-0.523319638371304	2.62986558214022	-1.55105450026807	0.185208459598814	0.915639186619765	-4.40608581207765
Q9H8T0-2	AKTIP	-0.165739160075019	3.29633838115536	-1.61264123979511	0.171395281310693	0.915639186619765	-4.40796351858729
Q9H920	RNF121	0.145087731867848	3.29220382820241	1.5482935282643	0.185852951154316	0.915639186619765	-4.40831417200748
Q5T9A4	ATAD3B	0.591454577729034	2.81156172534991	1.5479541610986	0.185932322226604	0.915639186619765	-4.40842266698568
Q9NRB3	CHST12	0.130323035052209	3.38986273603472	1.65893578350541	0.161694183867641	0.915639186619765	-4.40875175698688
Q8IWU6	SULF1	-0.108613402484025	3.36883246850459	-1.55700791886368	0.183826271424216	0.915639186619765	-4.40875921455477
Q9H4P4	RNF41	-0.223075246367254	3.21127809639929	-1.56504619578714	0.181976242072043	0.915639186619765	-4.41338222581821
P01024	C3	-0.608965590984825	3.10369524457784	-1.57761782036221	0.179119815966432	0.915639186619765	-4.41481335487472
O15514	POLR2D	-0.127154403424635	3.30205981630181	-1.6195175181371	0.169918229055456	0.915639186619765	-4.41745074600725
Q7Z6Z7-2	HUWE1	0.029600351340357	3.28698440681561	2.48291416857491	0.0587216874836667	0.915639186619765	-4.41821572498804
P36404	ARL2	-0.277452962514296	3.22922344907439	-1.71884040199571	0.149958453205836	0.915639186619765	-4.41877482247969
Q9NRN7	AASDHPPT	-0.10981391121127	3.3125028306641	-1.91978585464533	0.116588981421501	0.915639186619765	-4.41960963951131
Q96FH0-1	MEF2BNB; BORCS8	-0.175215677426778	3.34692339712794	-1.52849594004341	0.190539605984636	0.915639186619765	-4.41969621935232
Q9Y487	ATP6V0A2	0.0897192670914791	3.27046550013598	1.57482708869608	0.179750034224527	0.915639186619765	-4.42055644909785
P07093-3	SERPINE2	-0.549897592924073	3.14988047964518	-1.52738510871089	0.190805996046872	0.915639186619765	-4.42233500484783
O00763	ACACB	-0.172855880331616	3.32365570786053	-1.57543529640817	0.179612497924986	0.915639186619765	-4.42342126533206
Q9BSJ6	FAM64A; PIMREG	-0.130779787892844	2.7369250884688	-1.52173448830741	0.192166763927542	0.915639186619765	-4.42342152006034
O00165	HAX1	-0.207366397096352	3.32540116344732	-1.64502380002019	0.164549990677338	0.915639186619765	-4.42365991908219
P42336	PIK3CA	0.0655626594897648	3.38917287747315	1.66624498704361	0.160213850235965	0.915639186619765	-4.42371452995294
P30279	CCND2	0.18690994682693	3.40147458002833	1.52439352056141	0.191525237442099	0.915639186619765	-4.42438281003344
Q562R1	ACTBL2	-0.150196141614312	3.3825450259913	-1.55060973146138	0.185312132109045	0.915639186619765	-4.42443233662869
Q6ZNB6-1	NFXL1	0.453264360355857	3.33993706314535	1.68068595773725	0.157329237821686	0.915639186619765	-4.42454797637876
P31483	TIA1	0.0915084389930151	3.37115099578594	1.73141637004147	0.147606732908977	0.915639186619765	-4.42489585448869
O14524-1	TMEM194A; NEMP1	0.497107283490528	3.40401688915118	1.63998488521731	0.165596842655785	0.915639186619765	-4.42516301294671
P0DI81-3	TRAPPC2	-0.216195771568529	3.36092596552312	-1.5209163570073	0.192364573628837	0.915639186619765	-4.42685301030145
Q9P275-2	USP36	-0.092283825027722	3.32189733191123	-1.90265529099455	0.119106824565297	0.915639186619765	-4.42758897489114
Q9Y4L1	HYOU1	-0.108913241971852	3.36625154769223	-2.55618262813366	0.0538678765514454	0.915639186619765	-4.42767391689078
Q9BXS4	TMEM59	0.351556638691696	3.35219574269538	1.55650687290295	0.18394220330219	0.915639186619765	-4.42782761093734
Q96DT7	ZBTB10	-0.305963811080423	2.32065362028278	-1.51390071671342	0.194069066909385	0.915639186619765	-4.42793925365413
Q9UMX5	NENF	-0.0675666536647874	3.21130746611282	-1.65403694376248	0.162694061104783	0.915639186619765	-4.42873320787922
Q9UGN5-1	PARP2	-0.183776438694161	3.02529655457939	-1.53020670703526	0.190130060616744	0.915639186619765	-4.42877921772503
P50897	PPT1	0.163173823798059	3.24832620491143	1.56144259658116	0.18280332657686	0.915639186619765	-4.42915991425449
P62888	RPL30	0.0626041046725691	3.33854758279444	1.87898505367092	0.122679693597448	0.915639186619765	-4.42946315408086
Q9NR28-1	DIABLO	-0.168519629417043	3.16290154511866	-1.6059539512331	0.172844057705772	0.915639186619765	-4.42966698433393
Q96QU8	XPO6	0.0743558216351198	3.34369718920981	1.60475996000556	0.173104016449598	0.915639186619765	-4.42980515916303
Q9HCL2	GPAM	0.113053214182964	3.2902995615205	1.509259380532	0.195204849610675	0.915639186619765	-4.43096012621504
Q9Y3D0	FAM96B	-0.116206669427065	3.31585449101474	-1.57416245574774	0.179900449823354	0.915639186619765	-4.43116055312691
Q13370	PDE3B	0.298026504572526	3.38549331374039	1.55934459285041	0.183286567286874	0.915639186619765	-4.43149714104877
Q9H7H0-3	METTL17	0.143188140027957	3.23757221742735	1.50681414069069	0.19580584479625	0.915639186619765	-4.43160514719055
P06280	GLA	0.064057157695723	3.25056595891622	1.90120932528232	0.119321937787097	0.915639186619765	-4.43244573103311
Q9GZT5	WNT10A	-0.348739645851811	3.37167671869766	-1.54220294808475	0.187282518356813	0.915639186619765	-4.43421796767638
P14927	UQCRB	0.331773743096359	3.33707923400918	1.56473837981184	0.182046745674998	0.915639186619765	-4.43554900304435
P57723-1	PCBP4	-0.264987670559902	3.11549311556726	-1.64504762577721	0.164545056638907	0.915639186619765	-4.43633537615039
Q8IUR0	TRAPPC5	-0.271397535340572	3.33031298182693	-1.55906850040673	0.183350254807875	0.915639186619765	-4.4368081708885
Q16513	PKN2	-0.15452927117731	2.94855288147884	-1.63234757357388	0.167196297101376	0.915639186619765	-4.43919472838344
Q13137-4	CALCOCO2	-0.0524227877083037	3.26255284257302	-1.75298550988251	0.143660569196843	0.915639186619765	-4.43920777170742
P18440	NAT1	-0.177780278585295	3.32653139502198	-1.696671900302	0.154197271912339	0.915639186619765	-4.43935282416908
Q96LC9	BMF	0.144691850225964	3.42126075849861	1.49487518952209	0.198766349616924	0.915639186619765	-4.43987572629275
Q96LB3-1	IFT74	-0.125169986015938	3.07874084227399	-1.4979357114436	0.198003281281937	0.915639186619765	-4.44073820079568
Q9Y5X2	SNX8	-0.0964604283868965	3.31501366926929	-1.65119883938053	0.163276180537912	0.915639186619765	-4.44086863448142
Q9BT73	PSMG3	-0.0980027671708986	3.32540793473883	-1.63781224082808	0.166050280665491	0.915639186619765	-4.44121016715857
Q9NTX7	RNF146	-0.1122384013863	3.25003092584153	-1.48823290807294	0.20043234805831	0.915639186619765	-4.4426617356134
Q8N1G2	FTSJD2; CMTR1	0.0596532179003921	3.30322955319471	1.92530661394574	0.115789461537345	0.915639186619765	-4.44276687605263
P28161	GSTM2	-0.274443992714255	3.2010320132652	-1.7852829376671	0.137952588523191	0.915639186619765	-4.4428287741537
P04004	VTN	-0.94862751792266	3.18249182883802	-1.57461973684729	0.179796947392223	0.915639186619765	-4.44339356011254
Q9BYV9	BACH2	-0.200736604466152	3.33108862716667	-1.52784859826928	0.190694801400302	0.915639186619765	-4.44597202038392
O95425	SVIL	0.118400340279551	3.20057410989538	1.48371108705871	0.201574292339296	0.915639186619765	-4.44611515224675
Q6NUK4	REEP3	0.156203914998731	3.37749352534401	1.48926948773844	0.200171460579518	0.915639186619765	-4.44612791312858
Q96EI5-2	TCEAL4	0.0925181728592868	3.12600278343428	1.5015499155549	0.19710585618967	0.915639186619765	-4.44684315123663
P09669	COX6C	0.643636960276214	3.25278876910572	1.60331470583292	0.173419203382369	0.915639186619765	-4.44693407139696
Q96PU4-1	UHRF2	0.0928319600038003	3.38384256684726	1.69151458558646	0.155200726240353	0.915639186619765	-4.44729205983918
Q15287-1	RNPS1	0.0676729494358156	3.24393753698634	1.6956874026463	0.154388315192855	0.915639186619765	-4.44751961300942
A2RU67	KIAA1467; FAM234B	0.106553115368189	3.40544554155149	1.50231190965715	0.196917158127375	0.915639186619765	-4.447519753767
Q02818	NUCB1	-0.0811271456176677	3.30968486407584	-1.93029089325015	0.115072568741414	0.915639186619765	-4.4475610301964
Q9Y5Q8-3	GTF3C5	0.0576158334069062	3.27616249670417	1.76006254408061	0.142389444585005	0.915639186619765	-4.44899763142495
P0C0L4-1	C4A; C4B	-0.626377752235274	3.22316768930069	-1.50744078310757	0.19565165489481	0.915639186619765	-4.4495668080382
Q99519	NEU1	0.293826455584663	3.41224338334867	1.6053254490052	0.172980848117658	0.915639186619765	-4.44966327338759
P17568	NDUFB7	0.23561603160124	3.30181908363642	1.47927401255064	0.202701003234094	0.915639186619765	-4.45034217801012
Q9BVV7	TIMM21	0.478467522620222	3.30924633705139	1.4773120676064	0.203201157091201	0.915639186619765	-4.4504468031257
O43164	PJA2	0.0755354053798774	3.23402882636881	1.57035138085536	0.180765365377215	0.915639186619765	-4.45141679044497
Q9UHK6-5	AMACR	-0.200170469970268	3.32454504951681	-1.47412311122739	0.204016676067292	0.915639186619765	-4.45243408571338
Q2PPJ7-1	RALGAPA2	-0.155739784014671	3.27603226204637	-1.47488303634269	0.203822049934985	0.915639186619765	-4.45246293202102
Q9NVU7	SDAD1	-0.357737477211906	3.26569181404223	-1.68790874256169	0.15590624318926	0.915639186619765	-4.45340579095392
P49759-3	CLK1	0.117238341000564	3.21817634184357	1.48615207040377	0.200957058035079	0.915639186619765	-4.45374231510441
O75391	SPAG7	-0.0653702881632972	3.33950584461801	-1.70171978747155	0.153221484359588	0.915639186619765	-4.45399003688165
Q00536-2	CDK16	-0.148005109748546	3.18378425982534	-1.46567006246481	0.20619383494058	0.915639186619765	-4.45461050190539
Q8TD19	NEK9	0.0593938431668528	3.27252415326017	1.91262187444045	0.117635099209834	0.915639186619765	-4.45489040718365
Q8N999-1	C12orf29	-0.122893069503838	3.32391801481703	-1.68468431156491	0.156539885658871	0.915639186619765	-4.45498775344479
P47712	PLA2G4A	-0.117764210446041	3.34927647861825	-1.92743867773047	0.115482233948501	0.915639186619765	-4.45535016766569
Q6FIF0	ZFAND6	0.119685569148429	3.32290646580345	1.64717890418473	0.164104295312108	0.915639186619765	-4.45559587978958
Q9BZI7-1	UPF3B	0.205143763614963	3.193325540157	1.59354373529008	0.175565178410842	0.915639186619765	-4.45597737363176
O43325	LYRM1	-0.213102598803088	3.22483604662352	-1.47177110344314	0.204620201191758	0.915639186619765	-4.45639596065045
Q8NC44	FAM134A; RETREG2	0.273467883748687	3.37248731877196	1.46555760356096	0.206222951467725	0.915639186619765	-4.4566676652509
Q8NCP5	ZBTB44	-0.292414906916626	3.30640730681714	-1.57993208827905	0.178598861623297	0.915639186619765	-4.45802657449614
Q14451-3	GRB7	0.146097870463058	3.42005852042342	1.45952508879211	0.207790685031611	0.915639186619765	-4.4580515896396
O00401	ASB15; WASL	0.0822195447714488	3.06847279546259	1.54819290858957	0.185876480554656	0.915639186619765	-4.45874910161033
O95168-1	NDUFB4	0.333447537459925	3.31942866512693	1.45751529764692	0.20831555532875	0.915639186619765	-4.4591743672435
O94901-9	SUN1	0.625919090316337	3.38246539035085	1.46774307429258	0.205657830339957	0.915639186619765	-4.45999111745254
Q93034	CUL5	-0.0672335501584716	3.29768953769317	-1.90898927671198	0.118169295961089	0.915639186619765	-4.46025505479279
Q7L7X3	TAOK1	-0.149672842878861	3.23195471758136	-1.58884896468996	0.17660567892926	0.915639186619765	-4.46030403238769
O60513	B4GALT4	-0.244901834786432	3.12497975111546	-1.45257586289049	0.209610990388383	0.915639186619765	-4.46240534081665
P17098	ZNF8	-0.15937204015356	3.1733189978293	-1.44948391780879	0.210425864880909	0.915639186619765	-4.46314797421016
Q9NPL8	TIMMDC1	0.497227596557469	3.22427287967933	1.54619965652854	0.186343199745979	0.915639186619765	-4.46491902172227
Q8IZD4	DCP1B	0.0978332388366046	3.32291103149896	1.68353811886291	0.156765755314593	0.915639186619765	-4.46533280124902
O15460-1	P4HA2	-0.211352540134191	2.64931159536771	-1.46005600167415	0.207652248008617	0.915639186619765	-4.46708822564579
O94761	RECQL4	0.0986565989540463	3.33379164828912	1.56426561441578	0.182155082811718	0.915639186619765	-4.46799339877804
Q7Z2T5-1	TRMT1L	0.0450179303205878	3.2574130925015	1.90309424717842	0.119041602192628	0.915639186619765	-4.46825413308633
Q9Y274-1	ST3GAL6	0.253714818842469	3.40922213783724	1.46617696709776	0.20606264277604	0.915639186619765	-4.46956479222965
Q9Y6H5-3	SNCAIP	0.279401644503265	3.44606818557014	1.57326403719945	0.180103973088439	0.915639186619765	-4.46990452148622
O43312-5	MTSS1	-0.142526262342263	3.42079973574105	-1.51914716178276	0.192793018495693	0.915639186619765	-4.47044357929588
Q14249	ENDOG	-0.211298323073383	3.24546909954821	-1.44221077093295	0.212354792992819	0.915639186619765	-4.47145339733679
Q92845	KIFAP3	-0.108306251276641	3.31467381701635	-1.50984988292155	0.19505998632337	0.915639186619765	-4.47148729941566
Q8IZ21-2	PHACTR4	-0.0805342196489863	3.20435133644241	-1.54394716286098	0.186872013949877	0.915639186619765	-4.47170258298071
Q16773	CCBL1; KYAT1	-0.122652887761716	3.33128803139769	-1.60553738805068	0.172934708545434	0.915639186619765	-4.47244654429595
Q9BXK1	KLF16	-0.269748429548704	3.33087292656789	-1.43184536346841	0.215133384661531	0.915639186619765	-4.47286844542968
Q13206	DDX10	-0.177718576388607	3.22875728996702	-1.98854316318835	0.107031450509207	0.915639186619765	-4.47311321343025
P49005	POLD2	0.0858633250743381	3.37371401831535	1.7348915068297	0.146963535664628	0.915639186619765	-4.4754737739245
O75964	ATP5L	0.626908364890306	3.36277047834148	1.5436982810027	0.186930534395252	0.915639186619765	-4.4760153196838
O95816	BAG2	-0.0931109044859412	3.22418232050744	-1.63758375140079	0.166098039615024	0.915639186619765	-4.4763088927337
Q8NEC7-1	GSTCD	0.0711886562017449	3.27558030630367	1.59992342615253	0.174161039550502	0.915639186619765	-4.47726730598694
Q99941-1	ATF6B	0.244207942006855	3.36649601100346	1.43217477785134	0.215044543168459	0.915639186619765	-4.47855415085084
O75746	SLC25A12	0.453266990123493	3.30635375063938	1.53775550754605	0.188333265222696	0.915639186619765	-4.47891934203959
Q9NUI1	DECR2	-0.156539203382135	3.30420670480405	-1.42975632672263	0.215697612371363	0.915639186619765	-4.47897322811536
Q8IXM6-1	NRM	0.611686475582193	3.3019071052217	1.43183482761288	0.215136226715766	0.915639186619765	-4.47939003382003
Q96AC1-3	FERMT2	-0.332639298970484	2.45540780397091	-1.5687753792846	0.181124241140549	0.915639186619765	-4.47945876044557
Q05397-5	PTK2	-0.514895458944627	1.51348936489092	-1.5485616890183	0.185790257501131	0.915639186619765	-4.47996506024043
Q13905-3	RAPGEF1	0.0936800779332267	3.3846408131879	1.64365535718046	0.164833629279115	0.915639186619765	-4.48032651330897
Q9H1E5	TMX4	0.542994504500751	3.41362700361482	1.47959342986395	0.202619688590937	0.915639186619765	-4.48040887588901
O14548	COX7A2L	0.434255903038013	3.27522869352054	1.52052038080385	0.192460385561151	0.915639186619765	-4.4806422075435
P36955	SERPINF1	-0.420207327780803	3.02444925962935	-1.41618152603777	0.219398899421076	0.915639186619765	-4.48073188064018
O75431	MTX2	-0.12437062672735	3.28140621065618	-1.7817433933908	0.138566609396341	0.915639186619765	-4.48076634029931
P78330	PSPH	-0.254918475014585	3.1864516498815	-1.70220666560352	0.153127699990792	0.915639186619765	-4.48119111422099
Q9BQ15-1	NABP2	0.0964108262790056	3.27778512603844	1.49751323840013	0.198108444148196	0.915639186619765	-4.48155815364958
Q9UJS0-2	SLC25A13	0.472146816137194	2.65387409307912	1.56103478609358	0.182897160077324	0.915639186619765	-4.48173791129579
Q8NE86	MCU	0.610479531649156	3.20288443776196	1.54784567642165	0.185957701650646	0.915639186619765	-4.48247409168353
Q9HC21	SLC25A19	0.615013224821548	3.27118407268057	1.43476786173181	0.214346435477999	0.915639186619765	-4.48443314348306
Q7Z434	MAVS	0.220667699199211	3.295628587224	1.53006619425679	0.190163665666164	0.915639186619765	-4.48494984471722
Q9P0U3-1	SENP1	0.0663449142679453	3.33846452983201	1.63412062783344	0.16682359510328	0.915639186619765	-4.48496403404851
Q96AG3	SLC25A46	0.550285993080822	3.29672647469385	1.4036154123655	0.222879500292102	0.915639186619765	-4.48672016829808
Q9BTL3	FAM103A1	0.094498823383792	3.33091671522061	1.43088778525887	0.215391839985685	0.915639186619765	-4.48692316218409
Q96T60	PNKP	-0.0705060257539888	3.3567836060813	-1.81838100260031	0.132344768977697	0.915639186619765	-4.48717261169859
Q96SD1	DCLRE1C	0.0915694968442372	3.40967181083346	1.45920915042519	0.207873109350058	0.915639186619765	-4.4875527670161
P12109	COL6A1	-0.410979852173168	2.08060761336297	-1.44678681570032	0.211139183626343	0.915639186619765	-4.48764986144557
Q6PK04	CCDC137	-0.254710646223844	3.12200460438602	-1.40259952698091	0.223163184881911	0.915639186619765	-4.4876550963547
O60934	NBN	0.0728554856240806	3.26433402881314	1.89234893229215	0.120648970090593	0.915639186619765	-4.48793280675516
Q9Y5X1	SNX9	-0.52981502410593	1.7779299273142	-1.48546340641975	0.201131008645091	0.915639186619765	-4.48975380133843
P19971	TYMP; SCO2	-0.258385735895701	3.35105124627783	-1.4591970778804	0.207876259553332	0.915639186619765	-4.48990640489871
Q9Y2C4	EXOG	0.643524435384895	3.28049731730565	1.43609442300551	0.213990145893978	0.915639186619765	-4.49017042238034
P16284	PECAM1	-0.081306855801573	3.38507399063472	-1.52099545419973	0.192345440586094	0.915639186619765	-4.49092711912703
Q8N5S9-2	CAMKK1	-0.316974882425114	2.89876000162916	-1.60470844944214	0.173115240243224	0.915639186619765	-4.49095574407711
O94832	MYO1D	-0.0380649963110609	3.37597221321738	-2.198561836273	0.0826472856119963	0.915639186619765	-4.49148120072722
Q96C86	DCPS	-0.118909551515232	3.35934651585314	-1.7991747415327	0.135569646323843	0.915639186619765	-4.49161234079232
P13716-1	ALAD	-0.130010268090113	3.36442122830591	-1.65605623739787	0.162281160446703	0.915639186619765	-4.4916242754953
Q969G6	RFK	-0.131408645876755	3.25258638547552	-1.60736799261301	0.172536693622381	0.915639186619765	-4.49237896493586
Q5VV67-1	PPRC1	-0.178371071883672	3.37459693494976	-1.41477449259029	0.219786014540379	0.915639186619765	-4.49362521311012
Q8WV22	NSMCE1	0.0878328587246485	3.23111758738871	1.49115948184951	0.199696638271193	0.915639186619765	-4.49451544365936
Q9NZW5	MPP6	-0.0474756185649066	3.26756124880586	-1.8247410152173	0.131294421188385	0.915639186619765	-4.49466347001602
Q9NW75-1	GPATCH2	-0.124852251669006	3.32745013864007	-1.43514921077773	0.21424395365058	0.915639186619765	-4.49606316478541
Q93052	LPP	-0.149775216604827	3.16885212336086	-1.43882210753617	0.213259336403212	0.915639186619765	-4.49698394668538
P12931-2	SRC	-0.114628022576967	3.16836244375611	-1.50065831137973	0.197326875327667	0.915639186619765	-4.49703597384019
P98196	ATP11A	0.19636152868857	3.36923794221236	1.39930513382611	0.224085520341042	0.915639186619765	-4.49755611906025
Q3ZCQ8-2	TIMM50	0.416657845492935	3.17932371255718	1.64619644051247	0.164307326964424	0.915639186619765	-4.49920322135637
Q96HD1-2	CRELD1	0.299176129416883	3.31751688832447	1.50668455581162	0.195837744954064	0.915639186619765	-4.49927483921674
O43829	ZBTB14; ZFP161	-0.391209755963753	3.21006486414379	-1.37328194025891	0.231500350852632	0.915639186619765	-4.50099338546857
Q9UH99	SUN2	0.621194402245176	3.477371705822	1.71480662547957	0.150720832242847	0.915639186619765	-4.50145225239667
P41208	CETN2	-0.105629720107147	3.1652486409428	-1.53428657604307	0.189156865898031	0.915639186619765	-4.50263790718476
Q9UL46	PSME2	-0.0651259346252193	3.4194801099774	-1.88322307619579	0.122031869708846	0.915639186619765	-4.50278916762065
Q8WWV3-1	RTN4IP1	0.186394194890738	3.29682491038761	1.40583325437467	0.222261371041271	0.915639186619765	-4.50281941251119
Q9UNM6	PSMD13	-0.0492689929712624	3.33015992111434	-2.07727902564145	0.0959034661114436	0.915639186619765	-4.50293326307175
Q96IX5	USMG5	0.680623673458775	3.25106368442903	1.41040814338438	0.22099150267738	0.915639186619765	-4.50411621228021
Q8NB16	MLKL	0.0972972777593825	3.44367328013905	1.4726440084328	0.204396011301542	0.915639186619765	-4.5049565963819
P56270-2	MAZ	-0.31468492632549	3.14944620960616	-1.39685754895331	0.22477313489458	0.915639186619765	-4.50523593687479
Q05084	ICA1	0.07762462025119	3.28816916186227	1.48128554346901	0.20218945427085	0.915639186619765	-4.50550037039851
Q9BVL4	SELO; SELENOO	0.100434697768463	3.37881106588139	1.38761067537935	0.227389163206012	0.915639186619765	-4.5055137957937
Q9H0D6-1	XRN2	0.0414793776040818	3.30039102531425	2.09892121041913	0.0933804600417332	0.915639186619765	-4.50607167979373
Q8TDN6	BRIX1	-0.266798717526303	3.17807670548748	-1.75767444752729	0.142817083939046	0.915639186619765	-4.507241371413
P15884-2	TCF4	-0.0925969164345808	3.38523075669634	-1.38907063864981	0.226974201293782	0.915639186619765	-4.50744147955745
Q96PV7-1	FAM193B	0.146937654635285	3.34190490478766	1.4262222143434	0.21665538929265	0.915639186619765	-4.50764696505318
Q9Y4X4-1	KLF12	-0.280688522348497	3.207113851086	-1.37138891131757	0.232048759102117	0.915639186619765	-4.50789446939404
Q02809-2	PLOD1	-0.125670489246411	3.14392458179448	-1.65969927655177	0.161538910222882	0.915639186619765	-4.50815098416769
Q12770	SCAP	0.204484995066567	3.31142861504749	1.35541445429711	0.236725911971624	0.915639186619765	-4.50937798941273
O15265-2	ATXN7	-0.294416146308527	3.29609270857885	-1.38449776287592	0.228276357513998	0.915639186619765	-4.50958442169775
O75865-2	TRAPPC6A	-0.106803402148507	3.38683588005359	-1.42617864089775	0.21666722362744	0.915639186619765	-4.50976201690895
P18084	ITGB5	0.307624686970279	3.44560450136919	1.550719129046	0.185286626973376	0.915639186619765	-4.51099225231825
Q5HYI7	MTX3	-0.362482364167014	3.18608680133416	-1.48852566486386	0.200358633088098	0.915639186619765	-4.51102446074653
Q53H12	AGK	0.564526229108705	3.33364529180281	1.70016949267398	0.153520496974935	0.915639186619765	-4.5110874364105
Q96QZ7	MAGI1	0.096317675950803	3.23475433595044	1.45020375394512	0.210235880284596	0.915639186619765	-4.51166756919868
Q9BRJ6	C7orf50	-0.113452341455487	3.32501477547944	-1.45007000920247	0.210271166640269	0.915639186619765	-4.51184973351907
Q96I51	WBSCR16; RCC1L	0.153998234825856	3.23369008678454	1.47641718635489	0.203429686076684	0.915639186619765	-4.51224659985131
Q9H4A5	GOLPH3L	0.0657293235860315	3.34739985342041	1.71385947597007	0.150900413617624	0.915639186619765	-4.51355586930982
Q8TD30-1	GPT2	0.113910599327673	2.84362855879971	1.34710940385496	0.239192687158254	0.915639186619765	-4.51359181215744
P12236	SLC25A6	0.471140150785976	3.16888219299758	1.52965499637723	0.190262041402534	0.915639186619765	-4.51372391922053
P18887	XRCC1	0.0493101427037633	3.30217660922273	1.8672231313861	0.124496450632523	0.915639186619765	-4.51391035985828
Q14781-1	CBX2	-0.43601013987851	1.69733930875537	-1.46337475382271	0.20678890096895	0.915639186619765	-4.51402421412367
O60749	SNX2	-0.075557151822304	3.33401413093342	-1.94130734754531	0.113504525286823	0.915639186619765	-4.51460395924852
Q96SK2	TMEM209	0.581893113400727	3.38925110022856	1.45048476526271	0.210161758741023	0.915639186619765	-4.51477643245974
Q7L513-10	FCRLA	-0.174839766494288	3.29233802147573	-1.40860955079586	0.221489912173168	0.915639186619765	-4.51527833202068
Q9NQ55-3	PPAN-P2RY11; PPAN	-0.410512629017456	3.17824892363691	-1.55705626094446	0.183815089874257	0.915639186619765	-4.51560512914604
Q9UK45	LSM7	-0.0724910338713703	3.36311424714225	-1.52691854807386	0.190917991929811	0.915639186619765	-4.51622263008905
Q9NRR4-1	DROSHA	0.132715197200327	3.34811882222303	1.35268620007778	0.23753359502455	0.915639186619765	-4.51678202705509
P00734	F2	-0.905711807115306	3.18662725836839	-1.70456948506575	0.152673391950546	0.915639186619765	-4.51728685506158
Q0P651-1	C4orf29; ABHD18	0.412453292611741	3.3605320831887	1.38184339182517	0.229035471929226	0.915639186619765	-4.51751978664167
P57105	SYNJ2BP	0.220942119126708	3.18973292331263	1.34960351875546	0.238449340652464	0.915639186619765	-4.51844548286943
P41091	EIF2S3	-0.165557158687386	3.31960996195583	-2.0008584345675	0.105408566128728	0.915639186619765	-4.51911796899492
Q9NUA8-1	ZBTB40	-0.516904330851163	3.13532376957288	-1.39239434697748	0.226032206537499	0.915639186619765	-4.52003980502002
Q9C0G0	ZNF407	-0.282059193397441	3.32369053562378	-1.3826652005688	0.228800188884084	0.915639186619765	-4.52005880329992
Q8ND83-1	SLAIN1	0.105312209350313	3.32315237107631	1.54953408018482	0.185563096207043	0.915639186619765	-4.52075746941247
Q9NYZ3	GTSE1	-0.0713570487065962	3.34145767493968	-1.4883867602053	0.200393605415433	0.915639186619765	-4.52175196060989
Q00688	FKBP3	-0.0750333900040161	3.12728817742141	-1.76456574835776	0.14158661733334	0.915639186619765	-4.52180199891237
Q8N4L2	TMEM55A; PIP4P2	0.11299872071637	3.30406914375893	1.33246664096986	0.243601113515529	0.915639186619765	-4.52211381719977
P54198	HIRA	0.0786073306760138	3.32773042902557	1.73172259129601	0.14754994056895	0.915639186619765	-4.52230948788339
Q8N488	RYBP	0.0776742171751551	3.30283874612796	1.42342172208872	0.217417256218526	0.915639186619765	-4.52275040054166
Q9Y253-1	POLH	-0.0855776553615558	3.35059227163187	-1.39246753233271	0.226011506656642	0.915639186619765	-4.52315518997312
Q9Y244	POMP	0.120423725877585	3.40826640871264	1.47336857009769	0.204210102295972	0.915639186619765	-4.52344075887723
Q9NVP2	ASF1B	0.1175021504231	3.3297075936719	1.40270058844145	0.223134948123909	0.915639186619765	-4.52385963271285
P35240-1	NF2	-0.0652594062753797	3.32132137396667	-1.68394998171279	0.156684555323177	0.915639186619765	-4.52397126423645
P00403	COX2	0.649884435535804	3.19129800161346	1.45991431173632	0.207689185298352	0.915639186619765	-4.52419388813321
P23142	FBLN1	-0.491064326914547	3.11097404596222	-1.32937815557634	0.244540670708726	0.915639186619765	-4.52473930247932
O60830-2	TIMM17B	0.572088261140465	3.10997181592369	1.38007653994918	0.229542100825221	0.915639186619765	-4.5247504463677
P50914	RPL14	0.288013503299454	3.43926468180788	1.7084768172284	0.151925117859954	0.915639186619765	-4.52614627149436
P15291	B4GALT1	0.146989074768714	3.36131176157857	1.38541502081414	0.228014592254513	0.915639186619765	-4.52667381080993
O94851-4	MICAL2	0.269077196375892	3.38644698221539	1.3252252457923	0.245809410824384	0.915639186619765	-4.52766386258816
Q9NYK1	TLR7	0.207095199524726	3.409115892607	1.46543836883658	0.206253826673577	0.915639186619765	-4.52837435372711
O95139	NDUFB6	0.65863988082996	3.17976412539613	1.36796551744122	0.233043649008809	0.915639186619765	-4.52911604969092
Q9NR31	SAR1A	-0.0843024159089796	3.32356758969559	-1.72625228405478	0.14856783951442	0.915639186619765	-4.52962531535002
P19878	NCF2	0.0672578386040348	3.43245586709945	1.74090050778378	0.145858101250436	0.915639186619765	-4.53028532418918
Q92791	LEPREL4; P3H4	-0.147205031660362	1.92032046748047	-1.30498410796128	0.252082064605623	0.915639186619765	-4.53121493347655
Q9NRK6	ABCB10	0.499389948845107	3.27962853436311	1.58800771320657	0.176792773300506	0.915639186619765	-4.53166049271352
P62913	RPL11	-0.0672503530445835	3.32609102497324	-1.82859911748099	0.130661465009128	0.915639186619765	-4.531751612375
Q9Y2W1	THRAP3	0.0282237622559184	3.32488495558934	2.16107437948321	0.0865213345629399	0.915639186619765	-4.5319007041059
A0PJW6	TMEM223	0.289695024721193	3.33558689268273	1.30112858327483	0.253293725581464	0.915639186619765	-4.53268305782588
P17535	JUND	-0.125488399534618	3.26641395939101	-1.29716923984925	0.254543666851515	0.915639186619765	-4.53384058861654
Q9BVN2	RUSC1	-0.14406088532173	3.29256437118833	-1.29373466420828	0.255632596002686	0.915639186619765	-4.53423468000138
Q16584	MAP3K11	-0.142619216110748	3.29852934062995	-1.31479627992855	0.249022819814428	0.915639186619765	-4.53437292806217
Q9H9A7	RMI1	0.106723394636084	3.27541055511788	1.43493553576052	0.21430136977535	0.915639186619765	-4.53471332357322
P09038-4	FGF2	-0.185860866866555	3.26558953150417	-1.29213264078968	0.256141998324294	0.915639186619765	-4.53485165005371
P60983	GMFB	-0.0951776382968392	3.1287973766079	-1.34230134499014	0.240631862302731	0.915639186619765	-4.53517320150562
Q9NP50-1	FAM60A; SINHCAF	-0.143766100957147	3.20954215207778	-1.37730855110047	0.2303379433138	0.915639186619765	-4.53561973423542
Q9Y6B6	SAR1B	-0.1159335351711	3.36189807549601	-1.43871671142186	0.213287529628008	0.915639186619765	-4.53637914155354
Q2LD37-1	KIAA1109	0.161583529796598	3.38171411607661	1.28757824738497	0.257595342205483	0.915639186619765	-4.53658077898219
P09917	ALOX5	-0.126796015720506	3.37722662889903	-1.29482085816037	0.255287750929229	0.915639186619765	-4.53687629358728
P78325-1	ADAM8	0.395759820148608	3.4843387508274	1.37182946516021	0.231921021014872	0.915639186619765	-4.53711819263419
Q96HE9	PRR11	0.276378066273939	3.22444511814467	1.36559693490631	0.233734364505296	0.915639186619765	-4.53725008713976
Q9P0J0-2	NDUFA13	0.455156893681572	3.36419002120961	1.58594759949931	0.177251776684506	0.915639186619765	-4.53772695516741
Q96B36-3	AKT1S1	-0.156514199296995	3.27426074801679	-1.29158701279412	0.256315709598623	0.915639186619765	-4.53808594311431
Q12772	SREBF2	0.217381617632686	3.3645117333008	1.28528709262139	0.258329363117543	0.915639186619765	-4.53823865557201
Q9Y3C4	TPRKB	-0.0815985041243277	3.30169233614457	-1.54539988713371	0.186530790802485	0.915639186619765	-4.53860132895429
Q8N1G1	REXO1	-0.131043069399856	3.29992233529178	-1.38461897508657	0.228241749786403	0.915639186619765	-4.5386150516327
O95861-1	BPNT1	-0.059409620991696	3.3178626723868	-1.84797422588114	0.127530246708094	0.915639186619765	-4.53879991530638
Q96BW9-3	TAMM41	0.135626077392404	3.26367925676518	1.33027709859916	0.244266849558774	0.915639186619765	-4.53931276772841
P37268	FDFT1	0.455472796468977	2.8939625402772	1.28106431478546	0.259687312812385	0.915639186619765	-4.53936493050333
Q96TA2-1	YME1L1	0.443359663348927	3.24110503100653	1.58137601421449	0.178274589598897	0.915639186619765	-4.53951165842024
Q96ER9	CCDC51	0.329234849989203	3.2550664987096	1.44258978566893	0.212253852609095	0.915639186619765	-4.53953366257086
Q9Y2S2-1	CRYL1	-0.221865970989732	3.37212418520497	-1.30538231696423	0.251957229809949	0.915639186619765	-4.53995800158102
Q14393-2	GAS6	-0.189319852475726	3.35781957337083	-1.7557376360871	0.14316487726016	0.915639186619765	-4.54040178865101
Q8IZD2-1	KMT2E; MLL5	-0.110403283099395	3.37345382337355	-1.45704131222067	0.208439527071276	0.915639186619765	-4.5404963182023
P15822-1	HIVEP1	-0.0668347714096796	3.37584480815746	-1.58655455774725	0.177116420259169	0.915639186619765	-4.54056864899563
O00767	SCD	0.463290585361613	2.61534674874385	1.28304094237157	0.259050851366912	0.915639186619765	-4.54086479341152
Q8WZ42-12	TTN	-0.174967498971746	3.35008350215106	-1.2765762170122	0.261137840691138	0.915639186619765	-4.54101787984117
Q86U42-1	PABPN1	-0.0602500387600298	3.23567413205623	-1.5743687521598	0.17985374872337	0.915639186619765	-4.54123117654981
Q9Y2W6	TDRKH	0.1611901133848	3.36401830409397	1.43923963718721	0.213147683528881	0.915639186619765	-4.54184534607052
Q9UQN3-1	CHMP2B	-0.103683789156101	3.28886923691831	-1.57440926216171	0.179844579539271	0.915639186619765	-4.5419256934708
Q9UPN6	SCAF8	0.0701067706209624	3.24369132865706	1.71280904562932	0.151099831891567	0.915639186619765	-4.54246287117986
Q8IWB9-2	TEX2	0.172915120467776	3.36459712732779	1.42565346323099	0.216809908294076	0.915639186619765	-4.54267456307663
O43301	HSPA12A	-0.156878431625666	2.62173839318864	-1.35585191348334	0.236596646899393	0.915639186619765	-4.5428813228346
Q9BWH2	FUNDC2	0.489880846614212	3.37566053276471	1.26976138366481	0.263354712310702	0.915639186619765	-4.54353420016953
P29590	PML	-0.140533804731926	3.36180895634432	-1.36517631712975	0.233857226202686	0.915639186619765	-4.54363515621755
O75367-1	H2AFY	-0.200435224502525	3.30971646644549	-2.12971556920029	0.0899119888635263	0.915639186619765	-4.54379476891838
Q9NYJ8-1	TAB2	0.392400221141605	3.2740254626722	1.30012842907642	0.253608926862806	0.915639186619765	-4.54458178906732
P13073	COX4I1	0.556927804697292	3.15968858121253	1.53078408144798	0.189992037085804	0.915639186619765	-4.5452434692203
Q9Y3Q8	TSC22D4	-0.0906154569585728	3.3615517013643	-1.59633315198788	0.174949857369743	0.915639186619765	-4.54536647767137
Q8IYB8	SUPV3L1	0.151039937176449	3.23037335283328	1.80327910453494	0.134873746366774	0.915639186619765	-4.54558011143281
Q9BWF3-1	RBM4	0.157751013118379	3.1804741535441	1.38673153631641	0.227639387978142	0.915639186619765	-4.54559809356914
Q92567-2	FAM168A	0.157934295003229	3.18721597427568	1.27582461971101	0.261381485524955	0.915639186619765	-4.54683535532417
Q12765-2	SCRN1	-0.241152244612976	1.95812901761902	-1.39538479055451	0.225187857759426	0.915639186619765	-4.54743449879862
Q9UEE9-1	CFDP1	0.144051837682552	3.04707199728822	1.31792859437419	0.248053565301339	0.915639186619765	-4.54744856879895
P25788-1	PSMA3	-0.0455158932336257	3.35714438247531	-1.93529526458858	0.114357465972902	0.915639186619765	-4.54827257121535
Q92854-1	SEMA4D	0.263881183185564	3.42685224275498	1.34532044797182	0.239727215564307	0.915639186619765	-4.54842263785974
Q8NCN4	RNF169	-0.0868550843078839	3.31083573433958	-1.48609471781122	0.200971539200883	0.915639186619765	-4.54847364176937
Q9Y3A2	UTP11L; UTP11	-0.249468452598257	3.21517211872077	-1.65301715707313	0.162902986995807	0.915639186619765	-4.54915590763962
O60551	NMT2	-0.1395554393193	3.36300873309331	-1.50036204471166	0.197400370360869	0.915639186619765	-4.54947193476501
Q9UKN8	GTF3C4	0.0424677292024993	3.1976602181157	1.90949867849989	0.118094232485064	0.915639186619765	-4.54997855908796
Q96MH6-1	TMEM68	0.377832900078212	3.36245352091261	1.31280392703107	0.249641172352355	0.915639186619765	-4.5502219560648
O00463	TRAF5	0.113920927829797	3.38223091484827	1.33480976639816	0.242890571566408	0.915639186619765	-4.55053120002215
Q9UQR1	ZNF148	-0.222589568403087	3.26840669980926	-1.6450170998269	0.164551378236611	0.915639186619765	-4.55375236142158
Q9NX14-2	NDUFB11	0.651459969374281	3.26701268223416	1.54259901386103	0.187189225420573	0.915639186619765	-4.55474624698801
P50453	SERPINB9	-0.155272893641313	3.14259669400559	-1.40616367934048	0.22216941985854	0.915639186619765	-4.55526486370739
Q96QE3-1	ATAD5	-0.518225391468111	3.15105777545361	-1.38347505178704	0.228568554654491	0.915639186619765	-4.5557623814623
Q02978	SLC25A11	0.437970856811234	3.25546434615242	1.53583640713931	0.188788463899364	0.915639186619765	-4.55643777886015
Q9UEE5	STK17A	0.130183199382207	3.4394880882262	1.32198825984553	0.246802615293641	0.915639186619765	-4.5564760919999
O76021	RSL1D1	-0.257212672807141	3.1817418648601	-1.78887825903091	0.137331756380956	0.915639186619765	-4.55653004723755
Q96H79	ZC3HAV1L	-0.565290163402651	1.69431152617931	-1.23649589283264	0.274427311553268	0.915639186619765	-4.55657184645331
P63272	SUPT4H1	0.0755343698005771	3.3544511834041	1.44905313070471	0.210539640970557	0.915639186619765	-4.5571759228697
Q5T9C2	FAM102A	-0.113943371537767	3.38475290543905	-1.27677999402136	0.261071818691099	0.915639186619765	-4.55775652804606
Q7Z3D4	LYSMD3	0.0984715714212334	3.37963270591177	1.42358999643414	0.217371404862001	0.915639186619765	-4.55792272782821
Q9NZJ7	MTCH1	0.315582142516781	3.21208499628456	1.24899892168263	0.270216344707681	0.915639186619765	-4.55806187609343
Q15070-1	OXA1L	0.664564492061889	3.17936157309706	1.44807025908301	0.210799452265048	0.915639186619765	-4.55823108870779
A7E2V4-4	ZSWIM8	0.0767385217068582	3.36766192005069	1.54804168662269	0.185911848582397	0.915639186619765	-4.55936453243431
Q9H7B2	RPF2	0.131637504457992	3.29826375776047	1.36241398404286	0.2346656226575	0.915639186619765	-4.55956576286828
O43310	CTIF	-0.0905048223559964	3.22061762496838	-1.38668403344608	0.22765291595177	0.915639186619765	-4.56042020830382
P14854	COX6B1	-0.136888403356421	3.31947851003381	-1.54229454698769	0.187260938237903	0.915639186619765	-4.56128245616753
Q9NYR9-1	NKIRAS2	-0.182785830933969	3.26561378209528	-1.2245130771901	0.278519372557511	0.915639186619765	-4.56146997123245
Q9BUR5-1	APOO	0.400990818047703	3.35730043085557	1.35962829091828	0.235483538771893	0.915639186619765	-4.56161238001729
Q5U5Q3	MEX3C	0.210119092974381	3.32216940452404	1.24145826850377	0.272748853688814	0.915639186619765	-4.56178993925939
P49327	FASN	-0.0768218909643141	3.25656823037469	-2.49582687335188	0.057832335156941	0.915639186619765	-4.56189057816537
P27449	ATP6V0C	0.182869852200747	3.29741787251099	1.27001994778581	0.263270284325124	0.915639186619765	-4.56278130957149
Q969V6	MKL1	-0.157469744997122	3.28328062403066	-1.21932567243071	0.280308052498733	0.915639186619765	-4.56325186162894
Q14061	COX17	-0.236665993841144	3.33225954057462	-1.30552260006487	0.251913266127085	0.915639186619765	-4.56353622393192
O43427	FIBP	-0.152054300230709	3.35936994273187	-1.7894047495706	0.137241084767221	0.915639186619765	-4.56385707579262
Q7L804-2	RAB11FIP2	-0.217084949258646	3.03609578890593	-1.22462984499854	0.278479229623509	0.915639186619765	-4.56468069102258
Q9P246-2	STIM2	0.240237787987948	3.40904505695064	1.27909384278971	0.260323235871723	0.915639186619765	-4.564681758774
Q14149	MORC3	0.0507771106126771	3.32405475716685	1.79476731416696	0.136321052747122	0.915639186619765	-4.5654547325122
O43674-1	NDUFB5	0.596124188083529	3.31466600541796	1.49252336398191	0.199354674596456	0.915639186619765	-4.56577862505965
P80723	BASP1	-0.165536812390987	3.39625763747827	-2.02188720672516	0.102697280586064	0.915639186619765	-4.56609988972352
Q5JS37	NHLRC3	-0.185831925289031	3.34914517061008	-1.23849269844169	0.273750783985803	0.915639186619765	-4.56618075403223
Q6NVV7	CDPF1	0.136889623000989	3.34497497922385	1.20073096787313	0.286805901703854	0.915639186619765	-4.56641782896498
Q8TDQ7	GNPDA2	-0.108844447524027	3.4095673531441	-1.45165922625692	0.209852248408255	0.915639186619765	-4.56713678855122
Q13443	ADAM9	0.210524831439508	3.16265180424344	1.29580332986197	0.254976208837677	0.915639186619765	-4.56771621177977
Q00839	HNRNPU	-0.0865001379942689	3.28446728992186	-1.42061763494793	0.218182684413009	0.915639186619765	-4.56810953901904
Q96NY9	MUS81	-0.172432193535319	3.23733102009379	-1.32021379018046	0.247348672782144	0.915639186619765	-4.56959877652929
P62380	TBPL1	0.140490544528962	3.21995397572418	1.26178197498176	0.265972531038164	0.915639186619765	-4.56969774541022
P09110-1	ACAA1	-0.109036150800475	3.32116994499182	-1.69904393053726	0.1537379606116	0.915639186619765	-4.5703537131455
A1A4S6	ARHGAP10	0.0751968852312286	3.37107939417957	1.63622612995401	0.166382094958611	0.915639186619765	-4.57047538458749
Q9H6R6-1	ZDHHC6	0.420827922599559	3.3392824499038	1.23481594296977	0.274997672108714	0.915639186619765	-4.57051586185993
Q68CR1-1	SEL1L3	0.453919333378795	3.42052341213129	1.18810000018164	0.291297238755958	0.915639186619765	-4.57066983026819
Q9UEU0	VTI1B	0.166866963078266	3.22674981981109	1.29226820360524	0.256098856262901	0.915639186619765	-4.57126457898267
Q92572	AP3S1	-0.0768787901805595	3.31136771181979	-1.57269618196968	0.180232730124491	0.915639186619765	-4.57127485312362
Q9NUQ7	UFSP2	-0.0622671057778998	3.36479070344906	-1.69070784975771	0.155358290093618	0.915639186619765	-4.57136087535903
P98198-3	ATP8B2	0.262466964486918	3.42132157329586	1.23057059681799	0.276443847745051	0.915639186619765	-4.57147115155149
O75586-2	MED6	-0.102168269041851	3.3030978693023	-1.26651346999388	0.264417375552169	0.915639186619765	-4.57187615524064
Q99536	VAT1	-0.112396404249266	3.03528609749109	-1.65127249482386	0.163261046690059	0.915639186619765	-4.57208592725636
Q9UKV5	AMFR	0.361928131858288	3.30020943104085	1.23131473314629	0.276189856453037	0.915639186619765	-4.57217420374177
Q8N5U6-2	RNF10	-0.130141451898295	3.32068060740708	-1.3549769911855	0.236855245058846	0.915639186619765	-4.5731541703185
O60936-3	NOL3	-0.172843384134444	3.35802153496679	-1.2689302332129	0.263626274400346	0.915639186619765	-4.5732608398815
Q5RI15-2	COX20	0.454502652590843	3.33023232349406	1.30079692604249	0.253398207725094	0.915639186619765	-4.57370540257944
Q5VT52	RPRD2	0.0409776727380026	3.35376561653489	2.03342102174498	0.101241651732918	0.915639186619765	-4.57397563092224
A8MT69-1	STRA13; CENPX	-0.103606985993382	3.32210388475766	-1.21472824000438	0.281902040246254	0.915639186619765	-4.57398916171207
Q9UBK8-1	MTRR	-0.0929940765237369	3.33763974569788	-1.46554797231987	0.206225445260297	0.915639186619765	-4.57445158410785
Q7Z7L7	ZER1	0.0990458881204017	3.28556467174139	1.24334019715341	0.272114781081589	0.915639186619765	-4.57446346454872
P54274-1	TERF1	-0.176106928021444	3.3160907729494	-1.3453749947268	0.239710900688629	0.915639186619765	-4.57469037287236
Q9H3K2	GHITM	0.575674263820983	3.17917393292656	1.37758411446054	0.230258596699195	0.915639186619765	-4.57536087533243
P29966	MARCKS	-0.12954487132886	3.1801601738745	-2.04609706324969	0.0996670760209791	0.915639186619765	-4.57578084001551
Q15528-1	MED22	-0.12464702474226	3.30430094608646	-1.26428440078465	0.265148980810819	0.915639186619765	-4.57583900593677
P53602	MVD	-0.0857854333904736	3.25772316929701	-1.48167638809834	0.20209020538066	0.915639186619765	-4.5758527932226
A6NI28	ARHGAP42	-0.165465148193292	3.31220145235322	-1.19458416265088	0.288983716757483	0.915639186619765	-4.57607493732065
Q9BY43-2	CHMP4A	-0.0877521919799797	3.36488833000033	-1.66865347961451	0.159729060903091	0.915639186619765	-4.57675648656528
P61163	ACTR1A	-0.0701460845581385	3.26100342029457	-1.70182048474306	0.153202082873582	0.915639186619765	-4.57708394868966
P04637	TP53	-0.357477883486508	1.43475000295242	-1.3815685032953	0.229114223698102	0.915639186619765	-4.57791797546783
P07738	BPGM	-0.300922362741499	3.28000751358151	-1.39916819877091	0.224123937107145	0.915639186619765	-4.57849447438993
Q9NVI7	ATAD3A	0.458796820495424	3.34844143856399	1.59381278401349	0.175505734687932	0.915639186619765	-4.57869467555065
O95785-3	WIZ	-0.0922714310533963	3.21636684602555	-1.62497697924774	0.168754599655138	0.915639186619765	-4.58012773999732
Q9H147	DNTTIP1	-0.0979783672784948	3.23768488315886	-1.29022759715062	0.256748982855546	0.915639186619765	-4.58051144613355
Q96IR7	HPDL	0.117401877912308	3.15626944597036	1.19102539099007	0.290251410308936	0.915639186619765	-4.58057741537533
O43488	AKR7A2	-0.07241743021206	3.35975066807655	-1.61166175382107	0.171606721819055	0.915639186619765	-4.5805953018696
Q14592	ZNF460	-0.197413737458057	3.28513282193354	-1.15368946063487	0.303855646887297	0.915639186619765	-4.58069776101807
Q05932-1	FPGS	0.073325596659615	3.3836987464665	1.54467633725583	0.186700664818325	0.915639186619765	-4.58149547424566
Q7Z6M4	MTERFD2; MTERF4	0.269009132433259	3.21574777940483	1.15040429826104	0.305079541954073	0.915639186619765	-4.58174312630994
P04066	FUCA1	-0.169673740562139	3.33871726417246	-1.62281760804964	0.169213890224068	0.915639186619765	-4.58218419259556
P53804-1	TTC3	0.0982919452940206	3.26711889589085	1.21142838019007	0.283051220175248	0.915639186619765	-4.58229139452017
Q96G21	IMP4	-0.0752127963671205	3.33806823651533	-1.38391583654752	0.228442575048771	0.915639186619765	-4.58290784068802
Q9H706	FAM59A; GAREM; GAREM1	-0.0960927182703523	3.32283432215529	-1.28971888947542	0.256911293382208	0.915639186619765	-4.58328950987795
Q8NHG8	ZNRF2	-0.0873049460875615	3.40372478763056	-1.37811745787291	0.230105097966187	0.915639186619765	-4.58334563872716
Q9Y6Y9	LY96	0.136259002075813	3.42355914043858	1.15842238186019	0.302100077877997	0.915639186619765	-4.58375303991855
Q3KRA6	C2orf76	-0.0997003201786373	3.34139720323241	-1.2994232962943	0.253831371213292	0.915639186619765	-4.58388572025773
Q8N668	COMMD1	-0.0871534351935271	3.34981125902635	-1.41434623408503	0.219903970888277	0.915639186619765	-4.58398038429996
Q562F6	SGOL2; SGO2	-0.647627121922517	3.16085978889104	-1.3275482714603	0.245098951567603	0.915639186619765	-4.58429313444225
Q3KRA9-2	ALKBH6	-0.123156214490703	3.27870108527183	-1.23810312998297	0.273882651642269	0.915639186619765	-4.58474349913533
Q8WZ73-1	RFFL	0.18714899409543	3.42227385341696	1.17636100933249	0.295528152211189	0.915639186619765	-4.58481818999772
Q7KZN9	COX15	0.397100545944909	3.18994492323648	1.2432636053436	0.272140560514496	0.915639186619765	-4.58562890949892
P60866	RPS20	-0.0874539139621458	3.29972358636524	-1.65752488918579	0.1619815174533	0.915639186619765	-4.58602652020191
P34949	MPI	-0.119008994999101	3.29480661714636	-1.8342026195414	0.129747778967393	0.915639186619765	-4.58608777797799
P62280	RPS11	0.0997422067627001	3.36129327606508	1.90100086386294	0.119352983603924	0.915639186619765	-4.58617591919306
Q9ULC3	RAB23	0.100434642510734	3.34418974425212	1.40088555000215	0.223642594675831	0.915639186619765	-4.58621363113566
P55789	GFER	-0.138686930983945	3.31149091637365	-1.38481786885969	0.228184973761156	0.915639186619765	-4.58701105087725
Q96IG2-1	FBXL20	0.192464356248106	3.2880429059607	1.25147936917314	0.269388025647819	0.915639186619765	-4.58744995822576
P35237	SERPINB6	-0.153682099369055	3.32113223023952	-1.75957926537012	0.142475879873998	0.915639186619765	-4.58846101313607
Q9BR76	CORO1B	-0.212443932153162	2.97014083268506	-1.55555739586046	0.184162091627757	0.915639186619765	-4.58884142246858
P30414	NKTR	0.0688236224821398	3.34223809872041	1.72904758354307	0.148046806490535	0.915639186619765	-4.58896204804147
Q6P3S6	FBXO42	-0.132170374581591	3.37819570458459	-1.16125264397105	0.301054586101842	0.915639186619765	-4.58923953766394
Q9H9H4	VPS37B	-0.136504527538128	3.39219061070396	-1.6613678282077	0.161200095684302	0.915639186619765	-4.58984861797759
P50225	SULT1A1	-0.173945361021708	3.3720049817607	-1.1550454182648	0.303351758106942	0.915639186619765	-4.59046813667565
Q9HCC9-1	ZFYVE28	-0.218535261831858	3.37248641249557	-1.10168006601732	0.323751271642138	0.915639186619765	-4.59105119391732
P36639	NUDT1	-0.0907190641278277	3.2733335702665	-1.525355645913	0.191293631491299	0.915639186619765	-4.59158537218702
O75151	PHF2	-0.175824779210622	3.27647293023833	-1.2179145694466	0.280796425044323	0.915639186619765	-4.59161739272038
Q14520-1	HABP2	-0.981136605892983	3.12460539423009	-1.43610086847218	0.213988416158274	0.915639186619765	-4.59196950659714
Q8NI35	INADL; PATJ	-0.0802052954384501	3.12886624839161	-1.29945898903003	0.253820107051947	0.915639186619765	-4.59206517059094
Q9NQX3-2	GPHN	-0.0774477413781135	3.21084977912415	-1.7225156821538	0.149267248845621	0.915639186619765	-4.59220736053269
Q7Z7L8	C11orf96	-0.147165657620493	3.40930961930864	-1.3692378603281	0.232673414724113	0.915639186619765	-4.59223977053045
Q15669	RHOH	0.148200189347917	3.44648569659494	1.19715214329572	0.288072068304312	0.915639186619765	-4.59276092724185
P30040-1	ERP29	-0.0634591506168922	3.35669726753434	-1.94052491451588	0.113615150973381	0.915639186619765	-4.5928956107604
P52429	DGKE	0.235323982027626	3.36899291388494	1.19178667061592	0.289979808548068	0.915639186619765	-4.59291362586471
Q9BXW6-1	OSBPL1A	-0.0893024146279696	3.28040617790698	-1.60494337250507	0.173064058043692	0.915639186619765	-4.59300913581245
O14908-1	GIPC1	-0.133049687589869	2.65824008118269	-1.33024614072335	0.244276274639063	0.915639186619765	-4.5933832681261
Q86SQ7	SDCCAG8	0.0716728096686677	3.23509853054365	1.35854414356894	0.235802588504645	0.915639186619765	-4.59467975385411
Q68DK2	ZFYVE26	0.0939703026423477	3.29851687270446	1.40646951055685	0.222084345160105	0.915639186619765	-4.59476828101639
Q6ZT07	TBC1D9	0.119722282992159	3.34509344728607	1.1264913280149	0.31412104678042	0.915639186619765	-4.59481464922424
Q92766-2	RREB1	-0.228443012157652	3.1875219075182	-1.39626639409095	0.224939513908702	0.915639186619765	-4.59484400278777
Q5T013	HYI	-0.204552372773615	3.33875759816368	-1.27767460179559	0.260782156424392	0.915639186619765	-4.59504852957273
Q9Y243-1	AKT3	0.0724405520082148	3.19213329057595	1.34582856125109	0.239575280026839	0.915639186619765	-4.59506703862309
P84157-1	MXRA7	0.394235802971595	2.78326636357968	1.1811804243119	0.293784517509274	0.915639186619765	-4.59558215508192
Q9H3L0	MMADHC	0.158571643961696	3.19652680166163	1.13124898460433	0.312303502754583	0.915639186619765	-4.59593218706356
Q9UIF9-1	BAZ2A	-0.335098264574526	3.186045416469	-1.62869093019685	0.167967577469473	0.915639186619765	-4.59594635535162
P23284	PPIB	-0.146250701790691	3.3591394439755	-2.36796923414413	0.0673353641966853	0.915639186619765	-4.59623935333781
O00308	WWP2	0.0900847524692634	3.32308158334452	1.50424103221355	0.196440226316616	0.915639186619765	-4.59739059277684
P49427	CDC34	-0.0772174790002466	3.26472863646679	-1.41720406391751	0.219117981174095	0.915639186619765	-4.59740160225355
Q9BYI3-1	FAM126A	0.107307131350176	3.41869163782734	1.36650022987383	0.233470720695945	0.915639186619765	-4.59834439186168
Q7Z3S9-3	NOTCH2NL; LOC100996717; LOC100996763; LOC101060226; NBPF19	0.107047211607165	3.41187467721586	1.17892059954133	0.294600953687609	0.915639186619765	-4.59868267605411
Q9Y6H3	XRCC6BP1; ATP23	0.0827767346776004	3.2747844748974	1.41948544800842	0.218492470162255	0.915639186619765	-4.59889298185438
Q96JN8-1	NEURL4	-0.233951561338206	3.14461160868688	-1.46832625418754	0.205507285743478	0.915639186619765	-4.59896426303907
Q9H330	TMEM245	0.329062123541093	3.33961342134509	1.13750865395816	0.309926317200317	0.915639186619765	-4.59932152828051
Q9NZL9	MAT2B	0.094697658216606	3.39891063231109	1.17652070972056	0.295470224983302	0.915639186619765	-4.59956398492011
Q8IXJ6	SIRT2	-0.136250915937679	3.32577212493288	-1.49962861914098	0.197582426938928	0.915639186619765	-4.59963328436352
Q9Y664	KPTN	-0.112707287078266	3.27438127672003	-1.16079053678867	0.301225066335928	0.915639186619765	-4.59974341219056
O14836	TNFRSF13B	0.191441795900955	3.44837509663394	1.338328557969	0.241827179503479	0.915639186619765	-4.60009972658541
P61764	STXBP1	-0.102939609295827	2.99768629851074	-1.40488754380503	0.222524746522163	0.915639186619765	-4.60063419473972
Q6NWY9	PRPF40B	0.100735334298313	3.36147543862162	1.15462486684974	0.303507959917818	0.915639186619765	-4.60099562391961
Q96SW2-1	CRBN	0.0886993347622708	3.31744375374171	1.47563047141249	0.203630799010165	0.915639186619765	-4.60130644370611
Q86Y07	VRK2	0.258466443234233	3.33424307594142	1.33545642889297	0.242694817975647	0.915639186619765	-4.60172845968764
P31321	PRKAR1B	-0.116494963855192	3.38160263414001	-1.21787921220885	0.280808671870186	0.915639186619765	-4.6018322072398
Q69YI7-1	NAIF1	-0.17192797970565	3.26070709700505	-1.0816037373799	0.331731700434454	0.915639186619765	-4.60215393519174
Q6P4A7-1	SFXN4	0.391690042258369	3.24873776894953	1.20562225510974	0.285083542414139	0.915639186619765	-4.60221639156913
Q14865	ARID5B	-0.102411255778772	3.36060563222142	-1.29958708405309	0.25377968577362	0.915639186619765	-4.60331942222454
Q9NZ43-1	USE1	0.249245867249634	3.40341003395608	1.10404490093649	0.322822355414625	0.915639186619765	-4.60452404998891
P52789	HK2	-0.13089109942103	3.23180220001563	-1.77517776589079	0.139713027920425	0.915639186619765	-4.60461743110078
Q9H2P0	ADNP	0.0499297766494416	3.26519277631582	2.0119222669084	0.103972764862377	0.915639186619765	-4.60472421230424
Q49A26-5	GLYR1	-0.190541657258981	3.31298128835232	-1.48919377112318	0.200190505785587	0.915639186619765	-4.60482733253039
Q8WUI4-5	HDAC7	0.0626311846327171	3.40567096493658	1.52762773878508	0.190747779300395	0.915639186619765	-4.60484950170624
Q86TJ2-1	TADA2B	-0.200899173233046	3.22594486846823	-1.25859914287507	0.267023412679264	0.915639186619765	-4.60492428893944
P13196	ALAS1	0.0955315203756435	3.10431335126539	1.16068481873112	0.30126407987983	0.915639186619765	-4.60501743293389
Q9NWS9	ZNF446	0.107828284372795	3.32357878372422	1.19557750474624	0.288630765623019	0.915639186619765	-4.60524668290333
Q8N3J5	PPM1K	0.109334586813693	3.39458581551288	1.15008328554925	0.305199371044847	0.915639186619765	-4.60532557451748
Q9BUL5-1	PHF23	-0.104182870631114	3.24746886061044	-1.20068541703686	0.28682198562504	0.915639186619765	-4.60622810741312
Q8NCY6	MSANTD4	-0.0950363704854059	3.28370924238857	-1.3254423386043	0.245742934695953	0.915639186619765	-4.60687955389738
Q96Q89-2	KIF20B	-0.0530214812202516	3.21855570238445	-1.78628185486154	0.137779808596443	0.915639186619765	-4.60710941480779
Q02446	SP4	-0.285607948840488	3.22919691188776	-1.26990314168124	0.263308421490199	0.915639186619765	-4.60884125747514
Q8NC56-1	LEMD2	0.382201109500682	3.36425844960685	1.31479162671182	0.249024262328212	0.915639186619765	-4.60913837174422
O15182	CETN3	-0.0752164852048289	3.20806801451408	-1.47568978112434	0.203615630545924	0.915639186619765	-4.60931474826802
P17655-1	CAPN2	0.0450997787622953	3.37948322030418	1.98115137033986	0.108018177054217	0.915639186619765	-4.60940720145053
Q9H008-1	LHPP	-0.158304060960422	3.33213741045937	-1.26555406092282	0.264732035434536	0.915639186619765	-4.60994462960646
O75027-2	ABCB7	0.539876505116765	3.10487206978528	1.32879334016933	0.244718962425516	0.915639186619765	-4.61018233812693
Q9Y4C8	RBM19	-0.0781367594593714	3.1618812072604	-1.49350648520503	0.1991085334265	0.915639186619765	-4.61035714925232
Q71F56	MED13L	0.0848906176934743	3.30844314329175	1.23791254125372	0.273947186501212	0.915639186619765	-4.61046785996672
Q53GL7	PARP10	-0.0853609824249629	3.42022992176217	-1.56077034803948	0.18295803038585	0.915639186619765	-4.61076204731425
Q68D10-1	SPTY2D1	-0.454420617893587	3.25347559716895	-1.06804153055536	0.337218878218332	0.915639186619765	-4.61153960742113
Q9H6V9-2	C2orf43; LDAH	0.125145620254091	3.36696869209555	1.47659704065096	0.203383735957396	0.915639186619765	-4.61156023284063
Q9Y3Q3	TMED3	0.155082608997058	3.25588351158675	1.25120821518102	0.269478460848333	0.915639186619765	-4.61160556692662
Q3MIT2	PUS10	0.0815332714525227	3.06807904377119	1.30310854382275	0.252670813509848	0.915639186619765	-4.61168680138878
Q9H061-1	TMEM126A	0.479815827056564	3.27008451241558	1.33759756410929	0.242047727009126	0.915639186619765	-4.61200888189242
Q9NZJ6	COQ3	0.101448166260187	3.22793893330825	1.34391717903084	0.240147292349528	0.915639186619765	-4.61205203965196
P23229-1	ITGA6	0.249551635150792	3.17307082079323	0.923522116000514	0.400629410080437	0.915639186619765	-4.61276007575642
O43291	SPINT2	0.477636758101232	3.44070520624107	0.909913710846324	0.407074694001394	0.915639186619765	-4.61310520072461
Q9NX08	COMMD8	-0.145839972579291	3.38550859354415	-1.37968827516062	0.229653575255765	0.915639186619765	-4.61333562076166
Q8TBF5-2	PIGX	0.317862675713155	3.39815653472786	1.06184034281977	0.339753832341666	0.915639186619765	-4.61340687368533
O96033	MOCS2	-0.0969275421197333	3.3408124140846	-1.22863451149345	0.277105679709114	0.915639186619765	-4.61390186686204
P61011-1	SRP54	-0.0717318567833624	3.27420873585974	-1.98627555702139	0.107333136850915	0.915639186619765	-4.61425224714824
Q96RL1	UIMC1	0.0517919797925196	3.35144169261262	1.67709849194605	0.158040901498924	0.915639186619765	-4.61439593108158
Q3MHD2-2	LSM12	-0.116281485409324	3.30814427775902	-1.42336151905545	0.217433662588671	0.915639186619765	-4.61477708135405
P0C0S5	H2AFZ	-0.144081909182123	3.29358370878941	-1.81537311782756	0.132844538281513	0.915639186619765	-4.61560095045822
Q14320	FAM50A	-0.0824526373866273	3.2753003985916	-1.70618149934151	0.152364230106653	0.915639186619765	-4.61576522721365
P04350	TUBB4A	-0.256450736397342	2.94318139636751	-0.673023375649923	0.532567535648036	0.920438179462333	-4.616009253201
Q96AX1	VPS33A	-0.0692123351725489	3.31513903946534	-1.64262254324172	0.165048027349903	0.915639186619765	-4.61604199441753
Q6NUN9-2	ZNF746	0.149889894304429	3.36072015353777	1.1350619756393	0.310853560029775	0.915639186619765	-4.61613815789108
Q9NRW4	DUSP22	0.107635608258865	3.4205394355302	1.269414450953	0.263468034298358	0.915639186619765	-4.6163225041478
Q86SR1	GALNT10	0.111501488916102	3.40335164532461	1.29395209460071	0.255563531453351	0.915639186619765	-4.61632310384389
Q86X55	CARM1	-0.0724912354088474	3.29494885528	-1.67929179451466	0.157605418968451	0.915639186619765	-4.61696707313392
Q13432	UNC119	-0.124157023909781	3.19947469803996	-1.09858020016442	0.324972448679992	0.915639186619765	-4.61718288069103
Q8TB40	ABHD4	-0.112704768403397	3.38200825218119	-1.22848826038618	0.277155732978136	0.915639186619765	-4.61750510768644
P27816-4	MAP4	0.126290600224453	3.42002259764576	1.38476972424297	0.228198715841497	0.915639186619765	-4.61760768729224
Q96BQ5	CCDC127	-0.15121060969366	3.3715041808966	-1.0821705100735	0.331504081030821	0.915639186619765	-4.61769069132749
P04424	ASL	-0.074520743949302	3.36160575034728	-1.67910456375188	0.157642546386911	0.915639186619765	-4.61834591763121
P02794	FTH1	-0.133680887109584	3.09484648422632	-1.30143004421387	0.25319879106394	0.915639186619765	-4.61844128488872
Q6P9G4	TMEM154	0.348286235218097	3.48001109392897	1.05834475041654	0.341189994855713	0.915639186619765	-4.6185143972988
P05141	SLC25A5	0.54804502624447	3.2604966170799	1.55107746539566	0.185203108145185	0.915639186619765	-4.61856098404287
Q9UPW0-1	FOXJ3	0.134980608938778	3.36754157870617	1.32220167404117	0.246737017598103	0.915639186619765	-4.61897836673701
Q96G04-1	FAM86A; EEF2KMT	-0.0856277985929821	3.42143592686106	-1.1746459188647	0.296150900399773	0.915639186619765	-4.61902857862794
Q9P2W9	STX18	0.336959173916178	3.24663706284632	1.27126671953949	0.262863531809343	0.915639186619765	-4.61996530343699
Q9BY12	SCAPER	-0.0709806301318765	3.26727290168928	-1.40152098335493	0.223464745177152	0.915639186619765	-4.62040973194479
Q13029	PRDM2	-0.324089896521251	3.26458864490939	-1.24936855741661	0.270092760513149	0.915639186619765	-4.62053708043662
P00973-3	OAS1	0.175860069902571	3.40491503330876	1.13184553795725	0.312076261180626	0.915639186619765	-4.62085803799599
Q9BUV8-5	C20orf24	0.450152671888323	3.44757618888831	1.14337906957868	0.307711533856385	0.915639186619765	-4.62094023001085
Q92613	PHF16; JADE3	0.0757743727505127	3.08838940215407	1.22383781701141	0.27875161990425	0.915639186619765	-4.62117211326115
Q9P2D1-1	CHD7	-0.153551424815429	3.18099919135807	-1.51093778340309	0.194793376343819	0.915639186619765	-4.62133131968307
Q96IW7	SEC22A	0.16846865456437	3.35157251525075	1.07444504992592	0.334618353582048	0.915639186619765	-4.62136047780813
Q13884	SNTB1	-0.218082142439723	3.24830930534006	-1.117139335799	0.317720949277547	0.915639186619765	-4.62141035730252
P0DMM9-3	SULT1A4; LOC105369243; SULT1A3	0.121265918054803	3.42734460206366	1.17104722808578	0.297461411177855	0.915639186619765	-4.62164195959816
P40424-1	PBX1	0.0819785216926792	3.29439864631843	1.43052188781669	0.215490676637114	0.915639186619765	-4.6220856897128
L0R6Q1	SLC35A4	0.253392221094689	3.32847674696766	1.22844533540753	0.277170425275222	0.915639186619765	-4.62208791357891
Q9BYG3	MKI67IP; NIFK	-0.210460451776712	3.3119936966358	-1.62120830280447	0.169556998353993	0.915639186619765	-4.62217724107711
Q7Z5K2-2	WAPAL; WAPL	0.043007397879167	3.32268882121768	1.90366679454645	0.118956586231002	0.915639186619765	-4.62241999157816
Q9BVJ6-1	UTP14A	-0.195495528737172	3.21875754840907	-1.72942660018991	0.147976302866071	0.915639186619765	-4.62293884280415
Q7Z6I8-1	C5orf24	-0.168486818015075	3.20082499728165	-0.509732690250534	0.633239155558358	0.940139315483278	-4.62295172413903
Q8WVD5-1	RNF141	-0.144668654401666	3.25514932111923	-0.952725403504079	0.38707654760369	0.915639186619765	-4.62366520815347
Q8IX18	DHX40	-0.164889991479232	2.63432562126857	-1.31316620882598	0.24952862668105	0.915639186619765	-4.62380868589681
Q9UGU5	HMGXB4	-0.14172294361764	3.29728586873237	-1.28401410776731	0.258738030496636	0.915639186619765	-4.62416689513426
Q15126	PMVK	-0.0998229032918479	3.406291856897	-1.4430556524005	0.212129845078362	0.915639186619765	-4.6242758838394
P46783	RPS10	-0.106215079770428	3.32394783247794	-1.86167895442593	0.12536249440905	0.915639186619765	-4.62438858401945
Q8TB36	GDAP1	0.300073836602477	3.06626962993621	0.960692943844019	0.383444649412789	0.915639186619765	-4.62469169292725
Q9NPR2-1	SEMA4B	0.16548749744302	3.41745092484401	1.10968988240887	0.320614409632486	0.915639186619765	-4.62478117979023
P25490	YY1	-0.169147552230396	3.20923863346017	-1.37687414125714	0.230463081562199	0.915639186619765	-4.62525210974379
Q9NVS9	PNPO	-0.146575882684867	3.34817080892451	-1.45591928416918	0.208733280767848	0.915639186619765	-4.62549770963985
Q08623-4	HDHD1; PUDP	-0.11450045527826	3.35810400461338	-1.42380884466912	0.217311787066914	0.915639186619765	-4.62554400744394
Q13948	CUX1	0.0848167052081091	3.30387591125857	1.30040595361147	0.253521427601151	0.915639186619765	-4.62556279649502
O15550	KDM6A	0.0685307797422863	3.25287770184355	1.39685852946835	0.224772859028947	0.915639186619765	-4.62595114083399
Q14244	MAP7	-0.0586534876919341	3.35265455019221	-1.47129767142131	0.204741893721203	0.915639186619765	-4.62614014706181
P56385	ATP5I	0.625089815315961	3.30437835539761	1.49359790511287	0.199085659995309	0.915639186619765	-4.62721994079262
Q14651	PLS1	-0.159061795786033	2.64642993334328	-1.39638362526114	0.224906510137701	0.915639186619765	-4.62735477204844
P22413	ENPP1	0.228883181750018	3.14351281233885	1.15928195594491	0.301782211142484	0.915639186619765	-4.6275542213763
Q8TD26	CHD6	-0.231695615016544	3.22190618300726	-1.16012480326165	0.301470819831575	0.915639186619765	-4.62759300873313
O60704	TPST2	0.104853130136595	3.38307136502306	1.32493422064414	0.245898552316065	0.915639186619765	-4.6276167998869
Q14153	FAM53B	0.1449838505689	3.33578196224847	0.447244261876201	0.674535118238953	0.945484969462886	-4.62936251633359
O43159	RRP8	-0.0652228464815014	3.27409625650943	-1.60348168738875	0.173382758093015	0.915639186619765	-4.6295973771042
Q9Y3C7	MED31	0.110750190559804	3.35384809851471	1.07025566645071	0.336317731354226	0.915639186619765	-4.63014883553196
P16591-1	FER	-0.0995103872524702	3.3058897535037	-1.2571263517428	0.267510981030637	0.915639186619765	-4.63042514042533
Q9NPI8	FANCF	-0.13664408940226	3.345460848883	-0.872718844870034	0.425114130506376	0.915639186619765	-4.63112193746581
Q16850-1	CYP51A1	0.393847092727138	3.19283938624447	1.35150602979216	0.237883784476302	0.915639186619765	-4.63114274358772
Q8IWE2	FAM114A1	-0.159147184889438	3.27068914551597	-1.16464521662217	0.29980563840433	0.915639186619765	-4.63123995534464
P61962	DCAF7	-0.0559639022141861	3.25856754942489	-1.61081491505667	0.171789738222526	0.915639186619765	-4.63232300659793
P42025	ACTR1B	-0.0908122723335659	3.38253723578309	-1.44997419261059	0.210296449801894	0.915639186619765	-4.63238741510546
Q71F23	MLF1IP; CENPU	-0.0971746204390678	3.20666535334017	-1.40881467880109	0.221433014547777	0.915639186619765	-4.6329979918892
Q9UBX3-2	SLC25A10	0.407059815409607	3.22240839316735	1.20811350772462	0.284209911074867	0.915639186619765	-4.63301734829805
Q8N6S4	ANKRD13C	-0.158018089084474	3.34861496104848	-0.85035307674817	0.436260577382007	0.915639186619765	-4.63308491175707
Q8IXZ2-1	ZC3H3	-0.173257982463843	3.26963296198452	-0.967521889606613	0.380354107606782	0.915639186619765	-4.63317625818948
Q96N46	TTC14	0.0729378205130972	3.30225406103897	1.30013779303263	0.253605974090815	0.915639186619765	-4.63325444972312
Q9UHA4	LAMTOR3	-0.169486937100411	3.33839201622043	-1.55844196984029	0.1834948608349	0.915639186619765	-4.63333156091313
Q5C9Z4	NOM1	-0.160896197772406	3.30580579505885	-1.4988710392662	0.197770651839668	0.915639186619765	-4.63352056706686
Q5XKP0	C19orf70	-0.188566813335692	3.33671799294378	-1.41098912381377	0.220830736776432	0.915639186619765	-4.63384105639005
Q5T7W7	TSTD2	0.128365436483175	3.29589906275026	0.952421135846112	0.387215801286371	0.915639186619765	-4.63403066011161
O95149	SNUPN	-0.102441654385781	3.34559054040906	-1.21163300243541	0.282979836638234	0.915639186619765	-4.63412203877591
Q05048	CSTF1	0.0474925209249238	3.30888689127908	1.65598349042372	0.162296017229763	0.915639186619765	-4.63415058692298
O75368	SH3BGRL	-0.0515188615266187	3.37352508667626	-1.59487055924024	0.175272223926674	0.915639186619765	-4.63441873011998
P49069	CAMLG	0.268705644347325	3.32364033660312	1.06882646485121	0.336899174128781	0.915639186619765	-4.63445019131412
Q9UKQ2-1	ADAM28	0.167295141545712	3.40463912878997	1.24669666169813	0.270987253812651	0.915639186619765	-4.63459486833628
Q9Y584	TIMM22	0.284291411421527	3.19281517774296	1.05312238967114	0.343345313655643	0.915639186619765	-4.63498263310358
Q15751	HERC1	0.0482527760772398	3.31678969953239	1.59664575211263	0.174881034669583	0.915639186619765	-4.63567094723689
Q15631-1	TSN	0.0594200090496711	3.30406606000894	1.61759852081671	0.170329150703201	0.915639186619765	-4.63638113409883
Q14CB8-2	ARHGAP19	-0.142279641411309	3.24530384926039	-0.891313151296154	0.416018383134733	0.915639186619765	-4.6366052931953
Q9BQI3-1	EIF2AK1	0.142149232340074	3.19151504178516	0.968407980672686	0.379954603249313	0.915639186619765	-4.6366083570294
O75880	SCO1	0.506650906140932	3.05023606097251	1.17835659819113	0.294805035518117	0.915639186619765	-4.63670544197759
Q5VUG0	SFMBT2	0.0807957232456631	3.3315609942015	1.32199444879211	0.246800712750092	0.915639186619765	-4.63671932370315
Q15173	PPP2R5B	-0.177919864654171	3.30245463262151	-1.00246114799651	0.364862945314071	0.915639186619765	-4.63698227926761
Q6DD87	ZNF787	-0.248064398834469	3.2283877804215	-1.11903108381968	0.316989834038237	0.915639186619765	-4.63833322589692
O00472	ELL2	0.0893424041947821	3.32970716726869	1.13598085236981	0.310505036261317	0.915639186619765	-4.63851593804612
Q86Y39-1	NDUFA11	0.44972266924858	3.31475882616622	1.13902478898813	0.309352962094201	0.915639186619765	-4.63895800229192
Q9UKI2	CDC42EP3	0.0167675780476772	3.35776155280557	0.0523389917149625	0.960407822711071	0.995730418891197	-4.63920310213857
Q9BWL3	C1orf43	0.260940990193477	3.36323662411512	1.1738287751292	0.296448018772485	0.915639186619765	-4.6399266108117
Q9GZR2-1	REXO4	-0.164003085269804	2.92027075419618	-1.27650018505975	0.261162478352945	0.915639186619765	-4.63992784924064
Q9BY44-1	EIF2A	-0.0454655443500098	3.33025798080119	-1.92151383737499	0.116338114062845	0.915639186619765	-4.63995652245086
Q96QT4	TRPM7	0.235131209425837	3.35871126148882	1.09405382812024	0.326762812690203	0.915639186619765	-4.64118093924081
Q8IX07	ZFPM1	-0.135945502286435	3.26516309980062	-0.841635297424066	0.440666209232872	0.915639186619765	-4.64142122318167
Q9H8M2-5	BRD9	-0.220491068231637	3.33005384208716	-1.64001802793506	0.165589935308187	0.915639186619765	-4.64209900192495
Q92890-1	UFD1L; UFD1	-0.0687411311198972	3.36607607366203	-1.73885037114612	0.146234293011976	0.915639186619765	-4.6422056481288
Q12955	ANK3	-0.107993098990119	2.97715818485415	-1.24287918363501	0.272269983830836	0.915639186619765	-4.64264171221499
Q5T6S3	PHF19	0.0624961200933014	3.27797962938787	0.23747428714577	0.822282065610752	0.971778849981976	-4.64281978036627
Q9BZE1	MRPL37	0.13711707408685	3.30589271475385	1.57608550747359	0.17946557889657	0.915639186619765	-4.64290089608216
O75438	NDUFB1	0.476747449973156	3.28356516287307	1.33639993730209	0.242409471580331	0.915639186619765	-4.64325361536238
Q7L1Q6-3	BZW1	-0.0427701230710958	3.30375186192772	-1.87025807369812	0.124025006514114	0.915639186619765	-4.64336061567108
Q96A73-1	KIAA1191	-0.164578419681782	3.19260499663958	-1.1361754908645	0.310431255601988	0.915639186619765	-4.64336998183626
Q96EU6	RRP36	-0.0992557301795933	3.14178361416444	-1.05929598665532	0.340798663959453	0.915639186619765	-4.64439032979074
Q17RS7	GEN1	0.132611204216394	3.29119787802542	1.22048842596937	0.279906213296018	0.915639186619765	-4.64464906570782
Q9UIU6	SIX4	-0.189106851813983	2.4381246340685	-1.01798281527935	0.358152318198373	0.915639186619765	-4.64494695046537
Q15149-4	PLEC	0.107418067748944	3.41971564967505	0.98725284607931	0.37154006444813	0.915639186619765	-4.64495071845895
Q9H6E4	CCDC134	-0.0628755707535765	3.27841706538837	-1.42841286956352	0.216061219948556	0.915639186619765	-4.6451765148111
Q9GZS1-2	POLR1E	-0.241999504862473	3.29594902233218	-1.5825914529812	0.17800208448252	0.915639186619765	-4.64552201812826
Q9NVQ4-2	FAIM	-0.0747188925673203	3.26943066156512	-1.26441969656637	0.265104522004188	0.915639186619765	-4.64641067048178
Q96EP5	DAZAP1	0.0465604970672149	3.34181561604212	1.82454596555456	0.131326504934896	0.915639186619765	-4.64660944861548
Q6P1L8	MRPL14	0.143105777674603	3.28663913308706	1.45882662523858	0.207972947787063	0.915639186619765	-4.64669797497484
Q9Y4K4	MAP4K5	-0.156048067034986	3.05716624505452	-0.976161983900198	0.376473392177791	0.915639186619765	-4.64693024242842
O00409	FOXN3	-0.106155419101136	3.33590848452141	-0.430962674201741	0.685524187973675	0.948308276509856	-4.64704651521113
Q9Y388	RBMX2	-0.0942567504733936	3.27077898108544	-1.05095371459195	0.344243772479395	0.915639186619765	-4.64749561024921
Q9BX66-12	SORBS1	0.125931591438739	3.27667956221977	0.670454872422472	0.534064629213006	0.920438179462333	-4.64766781481063
Q8N3Z3-1	GTPBP8	0.13620021876824	3.29321838216365	0.981712012861857	0.373997925991759	0.915639186619765	-4.64791548665289
P21399	ACO1	-0.142899200489521	3.33246352793236	-1.8573493139842	0.126043171508792	0.915639186619765	-4.64808772226041
Q9BU64-1	CENPO	-0.110440157318719	3.21831243705088	-0.923681301072223	0.400554505270886	0.915639186619765	-4.64830900181358
P07996	THBS1	-0.714315047209977	3.23377053671707	-1.61969202911802	0.169880909694054	0.915639186619765	-4.64906117224922
P62330	ARF6	-0.0863053510152482	3.34310813375784	-1.61310921083487	0.171294352969008	0.915639186619765	-4.64920150836324
Q99943	AGPAT1	0.32393322317971	3.16943965693276	1.00701100509748	0.362884996627992	0.915639186619765	-4.64932762715135
Q96EY9	ADAT3	0.132486686753241	3.2878070879716	0.746155251236062	0.491153263455616	0.919407291326043	-4.64976172594648
O00512	LOC101060700; BCL9	0.0770160187937518	3.35670485741493	1.29887112045469	0.254005690096728	0.915639186619765	-4.64996926680455
O60568	PLOD3	-0.134701522667284	3.2900975527397	-1.6301078244653	0.167668295096439	0.915639186619765	-4.6507344688088
Q96C12	ARMC5	-0.0935905898346925	3.3452989505428	-1.12348584800143	0.315274020487545	0.915639186619765	-4.65114652883492
P11137	MAP2	-0.135535909912599	3.15990471993067	-1.46072572035927	0.207477744657423	0.915639186619765	-4.65117681875988
Q6NW34	C3orf17; NEPRO	-0.326227794102961	3.2031746824313	-1.32977181457676	0.244420725313662	0.915639186619765	-4.65135112508748
Q9Y5K6	CD2AP	-0.078144303036828	3.3746628884775	-1.95751884739239	0.111237711178901	0.915639186619765	-4.65234357721582
Q8N3X6-1	LCORL	-0.112260005699697	3.14285312267057	-0.655790950502785	0.542666323237247	0.922209846401359	-4.65235564151598
O95379-4	TNFAIP8	-0.0995962652324696	3.38037282239562	-1.18915219136628	0.290920689261385	0.915639186619765	-4.65237332317233
Q9NXE4-2	SMPD4	0.387645331032869	3.37115992683933	1.36905493760177	0.232726608313175	0.915639186619765	-4.65243608650941
Q99719-1	SEPT5	-0.196209005852807	2.71556027837771	-1.03306010182454	0.351733910759403	0.915639186619765	-4.65246999481101
Q9NWQ8	PAG1	0.151755846845446	3.19854226274904	0.902226829328927	0.410751985158748	0.915639186619765	-4.65355089518461
P12235	SLC25A4	0.417591834046767	3.34795563443141	1.43778126382273	0.213537917584269	0.915639186619765	-4.65397885500477
P0CG12	CHTF8	0.0802637167565917	3.37316996339568	1.11265433887743	0.319460218502102	0.915639186619765	-4.65407935746753
Q9UJ70-2	NAGK	-0.0749147252636632	3.39427756176484	-1.73689833574762	0.146593404746944	0.915639186619765	-4.65435690930214
Q06330-1	RBPJ	-0.0676511368585931	3.2649857870153	-1.33900848540502	0.24162220922229	0.915639186619765	-4.65441793956168
P42696	RBM34	-0.309413352184057	3.1874912701018	-1.31190011136982	0.249922156906802	0.915639186619765	-4.65454291762798
Q9UL40-2	ZNF346	-0.129879123010846	3.12879051600797	-1.05723208535074	0.34164822613746	0.915639186619765	-4.65467086516149
Q9H6H4-1	REEP4	0.216831670640564	3.36071282094941	1.10560309967357	0.322211564052822	0.915639186619765	-4.6548319620444
Q7Z7K0	CMC1	-0.076769337315092	3.23587588842322	-1.20334710210704	0.285883518461039	0.915639186619765	-4.65534759879992
P48651	PTDSS1	0.487373805090864	3.41921153988507	0.98280935479696	0.373510084754704	0.915639186619765	-4.65568978349764
O43772	SLC25A20	0.415574956857554	3.29669575719768	1.40070366628472	0.22369352649535	0.915639186619765	-4.65576589679422
Q2T9J0	TYSND1	0.119014560599998	3.30332388235194	0.903154171074629	0.410306955738802	0.915639186619765	-4.65677091554026
Q96EX3	WDR34	0.1051916440137	3.26379343954059	1.19187644385453	0.289947795270111	0.915639186619765	-4.65678585398192
Q9NSC5-1	HOMER3	-0.113282498999205	3.31698454472027	-1.38007332749455	0.229543022939318	0.915639186619765	-4.65709912205296
O43852-3	CALU	-0.137315588084435	3.31677978249591	-1.52243641990821	0.191997208684087	0.915639186619765	-4.6576787768015
Q99704	DOK1	0.0951100635583893	3.37748145440628	1.46095122290243	0.207419019265759	0.915639186619765	-4.65829643326458
Q9UJF2-2	RASAL2	-0.107150792507147	3.1782285382567	-1.19468456964132	0.288948022759068	0.915639186619765	-4.65897745326273
Q14667-1	KIAA0100	0.150926981075382	3.33875434879097	1.22559226656444	0.278148565215157	0.915639186619765	-4.65937873648147
Q9H0N5	PCBD2	-0.124877712178005	3.36421990500477	-1.22743861044497	0.277515209586228	0.915639186619765	-4.65988591558848
Q9NPJ6-1	MED4	-0.0728799688858459	3.26559843750926	-1.17309987090217	0.296713278376114	0.915639186619765	-4.65995164548501
Q7RTS1	BHLHA15	-0.144882503563255	3.37958824208267	-0.855186687328159	0.433832591104037	0.915639186619765	-4.66062250386095
Q96NB3	ZNF830	0.0659628400218928	3.34794146817029	1.55132065290907	0.185146448707693	0.915639186619765	-4.6608537429168
Q86W34-4	AMZ2	0.0765156142270446	3.21547135744669	1.186832587912	0.291751393102836	0.915639186619765	-4.66104070736085
Q96G74-1	OTUD5	-0.0668889461936076	3.3087419452924	-1.38516357070871	0.228086322093156	0.915639186619765	-4.66108227815217
Q96ED9-1	HOOK2	-0.0761900321346972	3.20091244500624	-0.309329274316009	0.770299709751416	0.965976047124584	-4.6613532626463
Q9Y696	CLIC4	-0.134271349387896	3.32684316917964	-2.0135809363075	0.103759301814984	0.915639186619765	-4.66214649741384
Q8NFI3-1	ENGASE	-0.102863736299249	3.12833532089234	-0.826835938225877	0.448223544386563	0.916071348545599	-4.66235673509531
Q86UL3	AGPAT6; GPAT4	0.298022389587395	3.30206158901767	1.12873143781918	0.313264108428913	0.915639186619765	-4.66256546431957
Q9NZL6-2	RGL1	0.102733014139892	3.44453425795885	1.02912458038426	0.353399783175802	0.915639186619765	-4.66343553521914
Q92543	SNX19	0.244348652746892	3.3870355278858	1.14285120514249	0.30791010985747	0.915639186619765	-4.66364366584436
P32970	CD70	0.188007681508673	3.44073997819031	0.966653648525167	0.380745900222556	0.915639186619765	-4.66391929141034
O00264	PGRMC1	0.292048747184114	3.08844288614776	1.16453992516894	0.29984433082819	0.915639186619765	-4.66409249432666
O75398	DEAF1	0.0948184256558536	3.242647513538	0.511223667691249	0.632271516784251	0.940139315483278	-4.66421565604438
P11474-1	ESRRA	-0.183811140990445	3.29525391279451	-1.12618734459225	0.314237492777165	0.915639186619765	-4.66557840843825
Q9H2X6-1	HIPK2	0.105159889373377	3.35495597579638	0.885022181982638	0.419078355199167	0.915639186619765	-4.66599037437758
Q6PI26	SHQ1	-0.075141845714478	3.23466949339828	-1.20610598863355	0.284913716659422	0.915639186619765	-4.66630908013117
P25942-1	CD40	0.159007802311251	3.45894439189051	1.09196541602467	0.327591759494202	0.915639186619765	-4.66634153463636
Q9P2R6	RERE	-0.0275997749256223	3.27034105790238	-0.102900811768958	0.922283141677983	0.984670678598799	-4.66638037801896
Q6XUX3-1	DSTYK	0.0807540205119869	3.23407648023303	0.37084853681321	0.726860361285814	0.954541892793055	-4.66685658303717
Q9HBK9	AS3MT	-0.267484863752887	1.58303285924852	-1.12390873145388	0.315111567096116	0.915639186619765	-4.6669151754124
Q96N66-1	MBOAT7	0.343907903054136	3.37285925010514	1.11047282077591	0.32030922295471	0.915639186619765	-4.66823496907572
Q9Y2U9-1	KLHDC2	-0.112429616891688	3.2911558338879	-0.834225845506063	0.444437547531186	0.915639186619765	-4.66839802379531
P29992	GNA11	-0.168993288035052	2.02987292282876	-0.951282537497308	0.387737265794968	0.915639186619765	-4.66892792931824
Q9H792	PEAK1	0.102006828988382	3.27214983115738	1.13235978028205	0.311880491185128	0.915639186619765	-4.6689385880198
Q9C0B1-1	FTO	-0.0753041423270983	3.3182061827896	-1.64349707419099	0.164866468481376	0.915639186619765	-4.66899913482495
Q9HA47-4	UCK1	0.0884501301252706	3.33632239430273	1.09254067545785	0.327363240983573	0.915639186619765	-4.66935251292906
Q15691	MAPRE1	-0.0606636555459936	3.3145678174589	-1.93798093859761	0.113975618320938	0.915639186619765	-4.67056901211876
Q9BTV5	FSD1	-0.30080266188745	1.57305047705097	-0.664669528617618	0.537447166675046	0.920438179462333	-4.67116502191847
Q86XL3-1	ANKLE2	0.222574477846066	3.25871945510082	1.35337967598958	0.237328048892153	0.915639186619765	-4.67180899659323
Q5T7M9-1	FAM69A	0.104146361658692	3.33643713083562	0.987856808426329	0.371272966887879	0.915639186619765	-4.67187425682345
O43819	SCO2	0.395007919269945	3.29299604420917	1.3256408571534	0.245682160984599	0.915639186619765	-4.67213692436153
O60941-1	DTNB	-0.114640503164911	3.2971552079188	-0.873588648345538	0.424685188657008	0.915639186619765	-4.67233684666436
O14735	CDIPT	0.34851141390129	3.37075045744949	0.974731635007647	0.377113564029838	0.915639186619765	-4.67247967100018
Q15788	NCOA1	-0.0328625291551813	3.31408591540133	-0.15505990873117	0.883205900234365	0.978880471784897	-4.6724926917418
Q9BT30	ALKBH7	0.130206129022158	3.33405297216081	1.07292028142497	0.335235998367977	0.915639186619765	-4.67288402173982
O96018	APBA3	-0.100736736059412	3.34197355737435	-0.70374280776863	0.514884802374941	0.919864772915539	-4.67413060728959
Q02223	TNFRSF17	-0.101596612485105	3.42576128630249	-1.13854027320998	0.309536088617536	0.915639186619765	-4.6743391988864
Q9Y385	UBE2J1	0.459455014421501	3.4884458332668	1.50226278456379	0.196929317989586	0.915639186619765	-4.67521216601757
O75947-1	ATP5H	0.589685177888816	3.28366793339038	1.51247267123764	0.194417831876954	0.915639186619765	-4.67531820454494
O95059	RPP14	0.0900618527450256	3.31757483641663	1.11185851679961	0.319769707934597	0.915639186619765	-4.67547169205934
Q6GMV2	SMYD5	0.098567869381613	3.36603601227462	1.40961297467661	0.221211719702971	0.915639186619765	-4.67557486170727
Q9NX20	MRPL16	0.105312985602777	3.38004074254134	1.38125985982493	0.229202676541204	0.915639186619765	-4.67557964074042
Q9BYC5	FUT8	0.0828650439011562	3.29259929701992	1.09201116458732	0.327573581056501	0.915639186619765	-4.67602682956204
Q9Y606	PUS1	0.0460796306631327	3.24921626892418	1.53224779134666	0.189642573860327	0.915639186619765	-4.67610001220336
P24941-1	CDK2	0.048497493286089	3.23768445240028	1.61744607873679	0.170361836298611	0.915639186619765	-4.67652295563621
Q15131-1	CDK10	0.07073936061579	3.26384811398111	0.309220690484956	0.770377308791859	0.965976047124584	-4.67724722550383
P45877	PPIC	-0.248201515038353	2.48452715855366	-1.16537323850737	0.299538227635643	0.915639186619765	-4.67835451789025
P53007	SLC25A1	0.565858237626475	3.25422094554191	1.47302313358985	0.204298714322461	0.915639186619765	-4.67839584257818
Q9NVV0	TMEM38B	0.300716501519418	3.32940730906425	1.20257379961041	0.286155885409923	0.915639186619765	-4.67854487574621
Q9UDV7	ZNF282	-0.137609875363039	3.3071129423254	-0.878345130109876	0.422345550310036	0.915639186619765	-4.67860067329324
Q08043	ACTN3	-0.195822143860251	3.25848503788038	-0.956714138060051	0.385254822838637	0.915639186619765	-4.67872788179898
Q96N64	PWWP2A	-0.0922166121444992	3.2926927146916	-0.435870206646286	0.682202287350622	0.947471854456794	-4.67938581647647
Q6DKI1	RPL7L1	-0.115547159307929	3.24164232548352	-1.24012409155671	0.273199194336475	0.915639186619765	-4.67975906399796
O76070	SNCG	-0.362844890425548	1.27633942059519	-0.902618476784412	0.4105639873724	0.915639186619765	-4.68028202102735
O00115	DNASE2	-0.244067808882454	3.29517922422164	-1.46827027409619	0.205521732037895	0.915639186619765	-4.68033605024344
Q6UXI9-6	NPNT	-0.216565543004704	3.31020755287347	-0.733724032965995	0.498026535450469	0.919407291326043	-4.68052270639913
Q9UKF7-2	PITPNC1	0.127279526981546	3.43860525138222	1.40275505134489	0.223119732507532	0.915639186619765	-4.68054131012488
P42330	AKR1C3	0.0796849720944918	3.40191174234463	1.65466255376639	0.162566024689117	0.915639186619765	-4.68200806212433
P60484-2	PTEN	0.114127987129645	3.3615422888798	0.759817437516151	0.483678722327685	0.919407291326043	-4.68244134171952
O75787	ATP6AP2	0.253780273534635	2.97786429463139	1.09900900583975	0.324803283357531	0.915639186619765	-4.68273617680976
Q9NUU6	FAM105A	0.141396082246869	3.39685547090553	0.511938493572624	0.631807897725934	0.940139315483278	-4.68276571137085
Q8TAA5	GRPEL2	0.098932930053222	3.0990971003671	0.8461717035984	0.438369415773192	0.915639186619765	-4.68299765168326
Q9UBS0	RPS6KB2	-0.148955463537737	3.36906165200275	-1.09075561447764	0.328072799510191	0.915639186619765	-4.68363419668581
Q5T5U3	ARHGAP21	-0.11198177114648	3.21460593812002	-1.11253550531752	0.319506415307649	0.915639186619765	-4.68366272508905
Q14999-2	CUL7	-0.0946692950132775	3.20928657916461	-0.938175329539544	0.39378163980025	0.915639186619765	-4.68409205997
Q8N6F7-2	GCSAM	0.157050339157055	3.46647071435049	1.12152248997791	0.316029224150942	0.915639186619765	-4.68420899108304
O14967	CLGN	0.391133421479505	3.20255189798926	1.12417323187661	0.315009995072844	0.915639186619765	-4.68475909838522
Q9BX59	TAPBPL	0.185487819513347	3.43502475466671	0.913525955753372	0.405355777712025	0.915639186619765	-4.68479556906602
Q9UBU6	FAM8A1	0.229654704576083	3.30124521929904	0.994901023757981	0.368169524907488	0.915639186619765	-4.68537985314251
P63173	RPL38	-0.0749738537526121	3.33683884664787	-1.59351966601399	0.175570497263575	0.915639186619765	-4.68542672569838
Q16560-2	SNRNP35	-0.0931425306567008	3.2978924591873	-1.09922063203236	0.324719824435024	0.915639186619765	-4.68547958693124
Q9H040-1	SPRTN	-0.0986625764948264	3.15797223924549	-0.829103148697594	0.447059394257995	0.915919917160087	-4.68567081194092
Q86UW6	N4BP2	0.076407523087342	3.37827654425207	1.68369742460151	0.156734342659665	0.915639186619765	-4.68636069315538
O96006	ZBED1	0.11421644032777	3.37525204042172	0.867678581730428	0.427606419317288	0.915639186619765	-4.68654165232934
Q15063-1	POSTN	-0.319233653794623	3.20932730699176	-0.796145757719977	0.464209551932292	0.919361692717421	-4.68668348920084
Q8N4P3	HDDC3	-0.106036877545795	3.29417852917587	-1.10506875192886	0.322420906588762	0.915639186619765	-4.68678600215952
Q5VUJ9-1	EFCAB2	-0.115812428906962	3.40952906615078	-0.831942601587955	0.445604675636397	0.915639186619765	-4.68693965744807
P51170	SCNN1G	0.377224363380899	3.50581716195939	1.20051689501624	0.286881497556067	0.915639186619765	-4.68699983401928
Q9NPA5-1	ZFP64	-0.212186426623186	3.29684782358556	-0.971919866665644	0.378374635663566	0.915639186619765	-4.68766018541605
Q9Y303	AMDHD2	-0.0821341736629287	3.34145033440527	-1.41044892290812	0.220980214714379	0.915639186619765	-4.68817727267843
Q6EEV4-1	POLR2M	0.109887315410497	3.30305364519533	0.952830474995759	0.387028469235351	0.915639186619765	-4.68832755123318
Q9Y251	HPSE	-0.175637825940262	3.32347217188398	-1.24569712754532	0.271322575141263	0.915639186619765	-4.68842165119763
Q16877	PFKFB4	-0.180342165215746	3.28519360958326	-1.32603021253992	0.245563006206307	0.915639186619765	-4.68862268664317
Q96HS1-1	PGAM5	-0.065548803552072	3.11170068894641	-1.39996093535515	0.223901624312502	0.915639186619765	-4.68909906808172
O94768	STK17B	0.10017265399076	3.45086608577158	1.39970527962624	0.223973296611089	0.915639186619765	-4.68919331178344
Q2TAA2	IAH1	-0.129401307820917	3.30738938554416	-0.94233871397321	0.391853431261041	0.915639186619765	-4.68954774389849
Q8NC42	RNF149	0.270371425892444	3.42620962605875	1.14811771260429	0.305934002644486	0.915639186619765	-4.68964745504253
P51575	P2RX1	-0.0943644830527652	3.34317796130745	-0.866006519469178	0.428435736136115	0.915639186619765	-4.68965528132767
Q9BQE4	VIMP; SELENOS	0.436555562039452	3.35484391914899	1.28849145918015	0.25730331569922	0.915639186619765	-4.68978823866568
Q96BD0	SLCO4A1	0.163564901425855	3.48319646189408	0.802422681728399	0.460905566150742	0.919361692717421	-4.68990853015761
P55145	MANF	-0.158671578821038	3.34555619904256	-1.73643187777421	0.146679351258764	0.915639186619765	-4.69017452671789
Q9NRZ9	HELLS	-0.08735341526526	3.26250425247207	-1.89878348897054	0.1196837362648	0.915639186619765	-4.69039236818797
Q8N2W9	PIAS4	0.113484995855405	3.36727155025386	1.34857698424361	0.23875502448129	0.915639186619765	-4.69045256381254
Q13216-1	ERCC8	0.0781259040821944	3.26994441594056	1.06610118321411	0.338010305704768	0.915639186619765	-4.69077263177368
Q8IUH4	ZDHHC13	0.151778748189583	3.30457365723135	1.26239860051279	0.265769380236758	0.915639186619765	-4.6909741248594
Q15392	DHCR24	0.437971354261831	3.03850049986534	1.06326722405166	0.33916909519523	0.915639186619765	-4.69106478920262
Q96L50	LRR1	-0.0906927378076947	3.31651537539371	-0.885430319823965	0.418879295435224	0.915639186619765	-4.69110294181838
Q15006	EMC2	-0.0927467758924742	3.26284305525937	-1.37612610483093	0.230678716291962	0.915639186619765	-4.69129796064677
O95980	RECK	0.0912464079006302	3.33712384420936	0.494823664729205	0.642961305188021	0.94105679322795	-4.69130636529977
Q15021	NCAPD2	0.068327126578023	3.26408666615496	1.92689439974165	0.115560582404699	0.915639186619765	-4.69143549271963
Q15596	NCOA2	0.0630980035527532	3.33181089595843	1.43634031019723	0.213924168015757	0.915639186619765	-4.69154904440173
Q5T4F4-2	ZFYVE27	0.22812223240479	3.20513956826368	0.969503878847908	0.379460984130145	0.915639186619765	-4.69182480881744
O95470	SGPL1	0.257525503822048	3.32015193519558	1.0787871391228	0.332864874851705	0.915639186619765	-4.69183360925993
Q8N884	MB21D1; CGAS	0.141494086006993	3.43806550545668	1.5588628836966	0.183397699606639	0.915639186619765	-4.69225655755096
Q9BXK5-1	BCL2L13	0.32112732118644	3.35621577336179	1.37091913464157	0.232185043988847	0.915639186619765	-4.6922869745748
Q14511-1	NEDD9	0.0767214523453745	3.42179782467708	1.08880497841493	0.328849704180526	0.915639186619765	-4.69234985871637
Q9ULJ3	ZBTB21; ZNF295	-0.256609114527999	3.30974066916633	-1.42133893614911	0.217985544400065	0.915639186619765	-4.69270807064133
Q9HBF4-1	ZFYVE1	-0.146410634847984	3.3261770931551	-1.04122116368345	0.348300681358575	0.915639186619765	-4.69301676279081
Q68D51	DENND2C	0.0871221011988425	3.40468316012788	0.894178790364386	0.414630400287785	0.915639186619765	-4.69310500571085
Q13541	EIF4EBP1	-0.316920220679489	3.23716069276986	-1.49352584391514	0.199103689626785	0.915639186619765	-4.69321671454228
Q9BWU0	SLC4A1AP	0.0493611212818804	3.33883774760684	1.74927816791639	0.144331086052939	0.915639186619765	-4.69329890287347
Q8TDD1-2	DDX54	-0.18775412605657	3.11074126572695	-1.54407451778055	0.186842075549273	0.915639186619765	-4.69337226184733
Q8NET8-2	TRPV3	0.189842961790073	3.45936514737919	0.830140751898425	0.446527385057639	0.915800172163947	-4.69373979294323
Q05823	RNASEL	0.0818934308327843	3.39669102987468	1.65485704394067	0.162526241313484	0.915639186619765	-4.69379014533944
Q8N5J2-3	FAM63A; MINDY1	-0.0144040662359163	3.32526496942761	-0.0800966742276289	0.939455277560612	0.989995442402692	-4.69434256521033
Q01974	ROR2	0.248888407824445	3.35479550779615	1.03373573955901	0.351448591301302	0.915639186619765	-4.69446643678444
O14841	OPLAH	-0.169436347671834	3.29296698729329	-1.05696418627036	0.341758634524417	0.915639186619765	-4.69561976904833
Q643R3	LPCAT4	0.210469635694619	3.39943930625727	0.944953860260233	0.390646204135258	0.915639186619765	-4.6961241684145
Q9NPF5	DMAP1	-0.0917275070752276	3.28545528963306	-1.46782518667683	0.205636627008112	0.915639186619765	-4.69674071003279
O43752	STX6	0.101615311099778	3.36368938918183	1.00143241966673	0.365311413698817	0.915639186619765	-4.69705731803553
Q9HBM0-1	VEZT	0.263075852857953	3.37181788494918	1.14033178921702	0.308859449984756	0.915639186619765	-4.6971228297896
Q5THJ4	VPS13D	-0.0792878387123738	3.29515635029663	-1.33378947842386	0.24319972904715	0.915639186619765	-4.69738332128696
P31629	HIVEP2	0.0804111286175924	3.33859109135939	0.583343787169834	0.586503114212668	0.93025587207525	-4.69776913637385
P08574	CYC1	0.545961626100785	3.30848922905705	1.55438261663132	0.184434517596505	0.915639186619765	-4.69791821721333
P04440	HLA-DPB1	0.116583641334503	3.44500898627427	0.908327087413987	0.407831545986106	0.915639186619765	-4.69794679786606
Q8IWR0	ZC3H7A	0.0535234827193727	3.32142963479113	1.68824007565617	0.155841279359592	0.915639186619765	-4.69819570770657
O43566	RGS14	-0.080917430743768	3.38228156753817	-1.29774268451448	0.254362278316049	0.915639186619765	-4.69821767604853
A2RU49	AGPHD1; HYKK	0.0784039939660153	3.35368506319934	1.19693341777791	0.288149615766878	0.915639186619765	-4.69829056655686
Q8N9N8	EIF1AD	-0.140677861118813	3.36904929681544	-1.31237027793463	0.249775951308739	0.915639186619765	-4.69833860592816
Q7Z5L2-2	R3HCC1L	0.0596835695525363	3.31585313015969	1.27260534989635	0.262427458173126	0.915639186619765	-4.698429211568
P50053-2	KHK	-0.0628982182891154	3.39635383740108	-1.33000752601832	0.244348932016958	0.915639186619765	-4.69872520990748
Q9GZM8-2	NDEL1	-0.086803710931857	3.32974386964447	-0.92877633415721	0.398162997701137	0.915639186619765	-4.69943238526542
P78314-4	SH3BP2	-0.0249469498657273	3.33968059904597	-0.133569715019845	0.899267291957064	0.980724814853327	-4.69953634617916
Q9UM82	SPATA2	0.0695368556125913	3.32774642445877	0.363377359539529	0.732077406435859	0.956839262310294	-4.69978680637679
Q6UXV4	APOOL	0.350295750568864	3.26529341560692	1.30740937173866	0.251322661901086	0.915639186619765	-4.7004661479736
Q6ZMZ3	SYNE3	0.470359905307445	3.49798603195701	1.51766457005489	0.193152778907752	0.915639186619765	-4.70085407344016
O43189-2	PHF1	-0.124789210912148	3.33816893968337	-0.977083388916564	0.376061481978869	0.915639186619765	-4.70109708071122
Q9H5K3	SGK196; POMK	0.293509205974114	3.20933206377612	1.07443439550981	0.334622665997818	0.915639186619765	-4.70162475686016
Q8IY57-5	YAF2	0.0416905004893182	3.38066904373746	0.255286892445212	0.809284438063883	0.968596116640421	-4.70216252997593
Q5SNT2-1	TMEM201	0.298676979001837	3.37834196526002	0.870013635942656	0.426450371758577	0.915639186619765	-4.70229797210363
O75665	OFD1	0.0608701870936077	3.27890672070979	1.28918331536966	0.257082279148386	0.915639186619765	-4.70262319611755
Q9BY89-1	KIAA1671	-0.0254040759605711	2.68284634255496	-0.149464742013337	0.887381772637	0.979072134374396	-4.70263787100339
O95167	NDUFA3	0.321077606235892	3.32359383713975	1.33356960971922	0.243266399965721	0.915639186619765	-4.70280489071725
O15121	DEGS1	0.350400411940247	3.30116562811108	1.04711343234196	0.345839700228514	0.915639186619765	-4.70289426620082
Q9H0R3	TMEM222	0.224234590895479	3.39687235968058	0.949775516108216	0.388428347431887	0.915639186619765	-4.70361581726851
Q9BZD4	NUF2	0.052850011357063	3.30168921578135	1.48043307804593	0.202406089444767	0.915639186619765	-4.7040258554766
Q53T59	HS1BP3	-0.126010678995444	3.36799846412767	-1.47419691192605	0.203997766874437	0.915639186619765	-4.70434149575413
Q5QP82	DCAF10	-0.0932277937160775	3.24638275233979	-0.912605410744616	0.405793272722743	0.915639186619765	-4.70444629095072
Q9Y2U8	LEMD3	0.479686704203045	3.4941360590418	1.49748933826393	0.198114395052605	0.915639186619765	-4.70462099521683
Q14376	GALE	-0.110856250905614	3.32521317961083	-1.38862890368263	0.227099678254597	0.915639186619765	-4.70504929144737
Q8ND82	ZNF280C	-0.168704710692369	2.9312707115425	-1.23807189785718	0.273893226134288	0.915639186619765	-4.70567075151834
Q13418	ILK	-0.0869293589596867	3.32688578331241	-1.75005957220131	0.144189493918521	0.915639186619765	-4.70573108400708
O75061-2	DNAJC6	0.0815858265140517	3.05882125912091	1.18674076740852	0.291784320101365	0.915639186619765	-4.70577740413624
Q96FC9-2	DDX11	0.0930140572139561	3.28988839842033	0.962309628431025	0.382711132898814	0.915639186619765	-4.70581914250839
Q6ZS11	RINL	-0.0844985611711537	3.40414922343841	-0.834408021097989	0.444344525703157	0.915639186619765	-4.70599950428298
Q9NPF4	OSGEP	0.055653782042648	3.27968840688857	1.42562573673549	0.216817443774866	0.915639186619765	-4.70619139043295
Q9Y296	TRAPPC4	-0.0613166944731702	3.35627768646607	-1.49659837879888	0.198336360221125	0.915639186619765	-4.70624251193187
Q96PQ7-3	KLHL5	-0.136838561404822	3.33769028786644	-0.611923152357813	0.568947197767494	0.926244384449768	-4.70666065000608
P30626-1	SRI	-0.151560313147193	3.30034624300345	-1.64345543318862	0.164875108894108	0.915639186619765	-4.70670499825095
O95298-1	NDUFC2; NDUFC2-KCTD14	0.421757432835676	3.3129973418527	1.20674337576358	0.284690087357117	0.915639186619765	-4.70674292963628
Q9NVC3-1	SLC38A7	0.213464521804192	3.34627414235876	1.0958303548769	0.326059101121996	0.915639186619765	-4.70677942481283
Q96JY6-5	PDLIM2	0.0791520260063146	3.28821843485622	0.599665490233164	0.57643550543721	0.927582382174441	-4.70771097924484
Q14207	NPAT	-0.180823124811648	3.34303756560579	-1.47443031031277	0.203937976839811	0.915639186619765	-4.70773809839833
Q9NV88-1	INTS9	-0.0607262607774721	3.2965105029701	-1.37142641762134	0.232037881588053	0.915639186619765	-4.70799480411207
Q86VR2	FAM134C; RETREG3	0.257111759193717	3.35309311428362	1.05238682981015	0.343649822726726	0.915639186619765	-4.70833808997665
Q96D96-1	HVCN1	-0.0946696862148372	3.35047259433816	-0.661077208522642	0.539554775188304	0.922209846401359	-4.708475984396
Q68DK7	MSL1	-0.119253958417942	3.28300724722727	-1.33331334665696	0.243344128477861	0.915639186619765	-4.70855721211548
Q15390	MTFR1	-0.0826182800469534	3.22864182892103	-0.920380057747874	0.402110225096191	0.915639186619765	-4.70935136267673
Q6AWC2-6	WWC2	0.0479629129205452	3.34900785981015	0.292913024472258	0.782066154149887	0.966667628488912	-4.70947181287621
Q8WYL5-1	SSH1	-0.0777872652288435	3.37005014121952	-1.19290558673453	0.289581029152486	0.915639186619765	-4.70954294434533
P38435-1	GGCX	0.102382237217403	3.32036758502606	0.889817901155699	0.416744075034294	0.915639186619765	-4.70971713689691
O75379-1	VAMP4	-0.106202554896132	3.31636133730194	-0.754718225129744	0.486458752175388	0.919407291326043	-4.71008499485468
Q9NRG4	SMYD2	0.0781031446389124	3.30085421193135	0.951918797164988	0.387445795597517	0.915639186619765	-4.71029402658553
Q8TBM8	DNAJB14	0.132958507652929	3.36519013181868	0.814632363701074	0.454529467108668	0.917468712627077	-4.71079295945201
P07919	UQCRH	-0.144308945357063	3.30570232910409	-0.993152703924605	0.368937747538599	0.915639186619765	-4.71095874112907
Q8ND24	RNF214	-0.078163281404112	3.28574533815745	-1.51210446983751	0.194507855717219	0.915639186619765	-4.71142887933071
Q96G01	BICD1	-0.122331052459204	3.29735808098345	-1.24720638952146	0.270816398105346	0.915639186619765	-4.71168127344451
Q9NZM4	GLTSCR1; BICRA	0.0880564013564042	3.29379512443095	0.721653992173119	0.504765705051274	0.919407291326043	-4.71180238087111
Q6VEQ5		-0.0730130403850852	3.33294321090199	-1.37239037942341	0.231758481289748	0.915639186619765	-4.71211262274407
O95243	MBD4	-0.199930364711281	3.32879857145708	-1.24289451002638	0.272264822811783	0.915639186619765	-4.71214440801251
Q86X52	CHSY1	0.11736635727208	3.24642310196819	0.954694124095905	0.386176517817933	0.915639186619765	-4.71240135370978
Q3V6T2-1	CCDC88A	-0.318180622369245	2.8218873859236	-1.15102380537337	0.304848407874718	0.915639186619765	-4.71255891600596
Q9NZ32	ACTR10	-0.048943052727548	3.30302955913026	-1.4951750564396	0.198691458016781	0.915639186619765	-4.71308246551055
Q92771	DDX12P	0.073768293781345	3.29030711604923	0.520470296968122	0.626289458141972	0.939193919795928	-4.71353899565816
Q14353-1	GAMT	-0.116507884424028	3.3615686090321	-1.35393024637596	0.237164979783993	0.915639186619765	-4.71354995831866
P19484-1	TFEB	-0.0987828034065502	3.38474118132335	-0.844390985604958	0.439269893579973	0.915639186619765	-4.71384170766083
Q93075	TATDN2	0.0737850730118168	3.31247792502075	0.993774043381281	0.368664573859114	0.915639186619765	-4.71408797020185
P04049-2	RAF1	-0.0756397734760476	3.35372954885329	-1.3224418514363	0.246663213193784	0.915639186619765	-4.71441866083511
Q7L5Y1-1	ENOSF1	-0.0827435318254488	3.32084092921323	-0.636184278721197	0.554311598117895	0.923936978196585	-4.71449702773118
P62805	HIST1H4A; HIST1H4F; HIST1H4D; HIST1H4J; HIST1H4H; HIST1H4C; HIST4H4; HIST2H4B; HIST1H4E; HIST1H4I; HIST1H4B; HIST2H4A; HIST1H4K; HIST1H4L	-0.274850066346847	3.15880124495087	-1.76862936536613	0.140866143657941	0.915639186619765	-4.71450996598467
O75063	FAM20B	0.113245320316322	3.34077709177159	1.09030966109539	0.328250274069444	0.915639186619765	-4.71457369992301
Q8IYJ3	SYTL1	-0.153749578400198	3.23455506582128	-1.04096318346713	0.348408770824921	0.915639186619765	-4.71487278385515
Q32M88	ATHL1; PGGHG	-0.112302696398082	3.38386665862055	-1.33857884409091	0.241751709433418	0.915639186619765	-4.71504232928137
Q96GK7	FAHD2A	-0.144818847164616	3.27612687574281	-1.15918522076075	0.301817968476421	0.915639186619765	-4.71508914088603
Q9H0Q0	FAM49A	-0.0999926543149756	3.25106389872614	-0.876930090571936	0.42304052400319	0.915639186619765	-4.71513676787489
O15062	ZBTB5	-0.147249684903919	3.2754184597035	-0.827814493278216	0.447720799626027	0.91603896616437	-4.71514602058122
Q6P1M3-1	LLGL2	-0.0866345629342975	3.30930876845634	-0.778011150666784	0.473854408605475	0.919361692717421	-4.71535415683189
Q7L7V1-1	DHX32	-0.0839554309350313	3.32125307310846	-0.535987587711984	0.616324768698457	0.938371733202196	-4.71586354950107
Q9BRF8-1	CPPED1	-0.0878115004339822	3.34483794814974	-1.18224811421674	0.293399487573987	0.915639186619765	-4.71593240518719
Q86U70	LDB1	0.0899978278119879	3.24030049594554	0.743445672788254	0.492645546178875	0.919407291326043	-4.71617455811651
Q9H3H1	TRIT1	0.0762145183706575	3.33279955133799	0.914125058578448	0.405071253647622	0.915639186619765	-4.7164692288245
Q9HD47	RANGRF	-0.096885833878736	3.30900400231832	-1.05414776458357	0.342921212215041	0.915639186619765	-4.71662719551206
Q13564-4	NAE1	0.0392206996096044	3.33855985566011	1.86974997912193	0.124103803654347	0.915639186619765	-4.71671647321674
Q9H3Q1	CDC42EP4	0.124142312860431	2.01767950749526	0.447058045812125	0.67466028311363	0.945484969462886	-4.71683288845846
Q9BQP7	C20orf72; MGME1	0.0569846716585886	3.03794567692737	1.27346262187771	0.262148544099004	0.915639186619765	-4.71685817575502
Q9Y2R4	DDX52	-0.273761744795058	3.22393033340913	-1.20956343797811	0.28370256913613	0.915639186619765	-4.71689906793033
Q13444	ADAM15	0.215737072514165	3.34862426343116	0.934126118628626	0.395664364862776	0.915639186619765	-4.71699718593161
Q66LE6	PPP2R2D	-0.104946470236415	3.2988532141263	-0.914574218957048	0.404858044994302	0.915639186619765	-4.71715809919296
P11473-2	VDR	0.0759917171799122	3.42469519282065	1.05453501120693	0.342761161525251	0.915639186619765	-4.71717584560589
P07741-1	APRT	-0.080839041086052	3.34181741395619	-1.51511719164047	0.193772457340775	0.915639186619765	-4.71723376440757
Q15035	TRAM2	0.441361840445874	3.47622754093684	1.12749810609991	0.313735655214489	0.915639186619765	-4.7178157821236
Q6NXT6	TAPT1	0.438586509146861	3.42586938027078	1.31064489126812	0.25031287947398	0.915639186619765	-4.71796383900117
P13747	HLA-E	0.298508313946936	3.42059295933388	1.08139519890771	0.331815484877237	0.915639186619765	-4.71822147193459
Q13148-1	TARDBP	0.0765757514368044	3.30532412917212	1.74173137330647	0.145705922511636	0.915639186619765	-4.71863498998793
Q96A19	CCDC102A	-0.0739176566417559	3.35574799035392	-1.05863441118896	0.341070789886268	0.915639186619765	-4.71867007033169
P28324	ELK4	-0.137846476640798	3.40230195273477	-0.89020092549137	0.416558085751733	0.915639186619765	-4.71873835532687
P29374-1	ARID4A	0.065023029112352	3.27343479741455	1.27598549647558	0.261329316496085	0.915639186619765	-4.71885631154833
P22307-1	SCP2	-0.137007177238636	3.2949062813939	-1.90270633352744	0.119099238484616	0.915639186619765	-4.71966662445992
Q8N128-2	FAM177A1	-0.0790430926143213	3.21694926308678	-0.890081906772526	0.416615871915863	0.915639186619765	-4.71985137492221
Q9NWX6	THG1L	0.100220482911378	3.36114410174583	1.25589021452887	0.267920837909491	0.915639186619765	-4.71986151248751
Q9HD33-1	MRPL47	0.0663869217987452	3.31211774212837	1.27198661923398	0.262628933265328	0.915639186619765	-4.72007551399899
P23528	CFL1	-0.0731622915610853	3.37999655476745	-2.21182579546659	0.0813216533569871	0.915639186619765	-4.72007779733825
Q9HCJ0-2	TNRC6C	0.00538981406746841	3.33538951565581	0.0357739329548616	0.972930592096857	0.996840789868945	-4.72032054672994
Q9P206-2	KIAA1522	-0.0925053524387855	3.21325491788717	-0.73540705653083	0.497091967250832	0.919407291326043	-4.72033641859297
Q99607	ELF4	0.0592942514265894	3.27814085205525	0.413152327962172	0.697648418925708	0.950935785746387	-4.72072206585394
Q9BTC8	MTA3	-0.127946085645179	2.83270997554151	-0.977034968619136	0.376083118764725	0.915639186619765	-4.72086607984906
Q6NUK1	SLC25A24	0.264560638780768	2.98836917507247	1.34525024027984	0.23974821615252	0.915639186619765	-4.72168897625729
Q8NFH4	NUP37	-0.122151581679951	3.30474344283036	-1.48522437868032	0.201191419346694	0.915639186619765	-4.72172621107787
P30305-1	CDC25B	0.079958444843974	3.33370814460484	0.65644359424281	0.542281519751943	0.922209846401359	-4.72177450485563
Q96L73-1	NSD1	-0.20220113502429	3.23022887156503	-0.911046214646275	0.406535155012695	0.915639186619765	-4.72177921149805
Q96BD8	SKA1	0.0815817368575658	3.3679821569401	1.20065043875229	0.28683433695078	0.915639186619765	-4.72210891211176
Q7Z4G4	TRMT11	-0.083895627077028	3.23805438570618	-0.966771019202964	0.380692917411436	0.915639186619765	-4.72283091222087
Q12912-1	LRMP	0.298157281539056	3.44501841749184	1.29828195738082	0.25419180873141	0.915639186619765	-4.72311572706739
O43237	DYNC1LI2	-0.109410095133475	3.24119463814987	-1.36180869588147	0.234843113852527	0.915639186619765	-4.72319026385914
Q7Z698	SPRED2	0.156896281695574	3.41234056200512	0.921477116989224	0.401592693426336	0.915639186619765	-4.72323768726281
Q8TD55	PLEKHO2	-0.0583202276059234	3.37755968434988	-1.39073849988042	0.226501033729066	0.915639186619765	-4.72333503011903
Q9H488-1	POFUT1	-0.151997222395596	3.3114967319341	-1.50818522839624	0.195468633450953	0.915639186619765	-4.72336228997449
Q9Y3B6	EMC9	-0.0903937425241665	3.29225152114214	-0.627530221072347	0.559503693576325	0.924306618507403	-4.72348058062919
Q9UER7-1	DAXX	0.0543519176343686	3.30370843125963	1.32598850815424	0.245575766440575	0.915639186619765	-4.72348066500193
Q2YD98-1	UVSSA	0.0783213671028858	3.37921003504418	0.73145705063486	0.499287356873333	0.919407291326043	-4.72349384765296
Q9H8E8-1	CSRP2BP; KAT14; PET117	-0.0873611358642964	3.27684621620602	-1.06952691511413	0.336614101289189	0.915639186619765	-4.723542267598
O94916-5	NFAT5	-0.0881356394684007	3.1928154790349	-0.719872000414599	0.505766120726741	0.919407291326043	-4.72404912600893
Q9H9L3	ISG20L2	-0.126981875322081	3.29123956396948	-1.3122639078835	0.249809021720938	0.915639186619765	-4.72412802346644
Q8TF46	DIS3L	0.0557687620937971	3.3295214793292	1.36632195718275	0.233522730601729	0.915639186619765	-4.72441094140234
Q13127-1	REST	-0.20129615751543	3.23548431422873	-0.792619714807457	0.466073316790844	0.919361692717421	-4.72476439202211
P48551-1	IFNAR2	0.0983624736398132	3.41283578719848	0.762762573173877	0.482078357366446	0.919361692717421	-4.72544487432778
O14832	PHYH	-0.187191323305794	3.12617332087764	-1.29805888222599	0.254262312115068	0.915639186619765	-4.72562599795387
P43304	GPD2	0.174690324007942	2.97984887452807	1.24828927713446	0.270453753281448	0.915639186619765	-4.72579615796285
Q9NWZ8	GEMIN8	-0.102520805721273	3.29078928174307	-1.07106922890782	0.335987136453112	0.915639186619765	-4.72598700842065
P05412	JUN	-0.0743770564584094	3.01790719469201	-0.844638984333928	0.439144399460282	0.915639186619765	-4.72624768897022
O15534-1	PER1	-0.0260699455956635	3.2497137876084	-0.149591600964318	0.887287045986181	0.979072134374396	-4.72628406551892
P17676	CEBPB	-0.123323175812378	3.20689435826228	-0.621540722862292	0.563115698538895	0.924628050289802	-4.72630689220013
O94967-4	WDR47	-0.0640680636154687	3.05847125228676	-0.490918062672592	0.645521926804569	0.941255563430779	-4.72640711689218
Q8NFH8-1	REPS2	-0.105148534938487	3.33892180632874	-0.81896169722848	0.45228471410338	0.916579721867149	-4.72642171664143
Q9BXW7	CECR5; HDHD5	0.0971628040532222	3.25076395310131	1.36719710650407	0.233267516937281	0.915639186619765	-4.72682226885774
O75385	ULK1	0.000562042807523062	3.2462419654073	0.00368973518459408	0.997207338002418	0.99961226676834	-4.72707448533029
O75564	JRK	-0.0586821746631868	3.26684096792673	-0.393172192426095	0.711374325605584	0.953117503647409	-4.72801164055987
P17707-1	AMD1	-0.0755668090044701	3.32752148381307	-0.906945584015979	0.408491468627076	0.915639186619765	-4.72806707249082
Q9Y6G9	DYNC1LI1	-0.0712212915100215	3.27840478710013	-1.75093330102437	0.144031340687432	0.915639186619765	-4.72851041358469
Q99569	PKP4	-0.0145443586354895	3.29776524891588	-0.0903785526538195	0.931707396207213	0.988468610685746	-4.728543319912
P11802	CDK4	-0.129659680624708	3.05657206625446	-1.41711600540145	0.21914215957264	0.915639186619765	-4.72880532471647
Q3KP66-1	C1orf106	0.0731706443832302	3.39756124384928	0.897253578632559	0.413145209227382	0.915639186619765	-4.7290365463581
P52788-1	SMS	0.0512294879131364	3.20980955766654	1.55214190956531	0.184955233577831	0.915639186619765	-4.72914840553489
Q9Y4G6	TLN2	-0.124461185435583	3.06232555619637	-0.991962432772926	0.369461525747387	0.915639186619765	-4.72919841803018
Q9UHJ3-1	SFMBT1	0.0190972346374562	3.2696014521021	0.127494769784875	0.903818090572029	0.981658398204992	-4.72928216272907
Q4G176	ACSF3	0.0725405754864053	3.31081994576811	1.04721650744226	0.345796782192095	0.915639186619765	-4.72944759559033
Q9H8U3	ZFAND3	0.0906431852249079	3.27711555422993	0.910811324163903	0.406647012639055	0.915639186619765	-4.72971990772897
O95674-1	CDS2	0.323345952324062	3.37700231182897	1.11955022450971	0.316789457597373	0.915639186619765	-4.72991091947858
Q01167	FOXK2	-0.0797717872293967	3.26293052410115	-1.34124419949037	0.240949387059712	0.915639186619765	-4.73079243051778
Q9H1B5	XYLT2	0.0731710593619613	3.29193613410908	0.890743436410089	0.416294765438472	0.915639186619765	-4.73083180837526
O75157	TSC22D2	0.0515749094937238	3.26360666329323	0.356976829298905	0.736560147574296	0.9575831815013	-4.73085520376016
Q7Z6K5-2	C15orf38-AP3S2; C15orf38; ARPIN; AP3S2	-0.08614339275627	2.39405951620962	-0.343544351007221	0.746007019073807	0.958276167057927	-4.73086291761385
P40189-1	IL6ST	0.2405301670307	3.38115535148385	1.12872802077655	0.313265414021513	0.915639186619765	-4.73127647868695
Q3ZAQ7	VMA21	0.1466705658551	3.31812947567209	0.752668909017281	0.487579282293856	0.919407291326043	-4.73183389426522
O60716-1	CTNND1	-0.299617621444609	1.62450038312342	-1.43793637994568	0.213496378574568	0.915639186619765	-4.73205454110446
Q99576	TSC22D3	-0.100379758747359	3.12032419624554	-0.688193479428942	0.523783834507383	0.920438179462333	-4.73240368281749
Q96S99	PLEKHF1	0.0787216295553805	3.3380619739167	0.790679750871835	0.467101105762009	0.919361692717421	-4.73243604601516
P40123	CAP2	-0.126282385496404	2.39165185978198	-1.00873381708901	0.362138397655879	0.915639186619765	-4.7324411108555
O94921-1	CDK14	0.078292265256566	3.42914590472416	1.3860024983617	0.227847089499182	0.915639186619765	-4.73278562743651
Q9NUQ2	AGPAT5	0.229940368470663	3.41446456917019	1.28057071656998	0.259846474520018	0.915639186619765	-4.73281443156234
P20701-2	ITGAL	0.400219037902377	3.47732222605433	1.21862612927897	0.280550062586892	0.915639186619765	-4.73303485875301
Q99504	EYA3	-0.069717214469795	3.28059888704193	-1.03250610751724	0.351968007531633	0.915639186619765	-4.73344249692786
Q9BTX1	NDC1; TMEM48	0.463682092166926	3.3263487157807	1.307061725825	0.25143138597589	0.915639186619765	-4.73353109030035
Q9Y223-2	GNE	-0.124543624402219	3.27809292077003	-1.56452496787932	0.182095642435999	0.915639186619765	-4.73387934354216
O00560-1	SDCBP	0.13722643629952	3.14800718863862	1.21841586032315	0.280622843250458	0.915639186619765	-4.7344881670687
Q9Y2U5	MAP3K2	-0.0707518392252418	3.39247518496461	-0.702965231793236	0.5153272995197	0.919864772915539	-4.73460702067631
Q66K64	DCAF15	-0.0736241065659469	3.14052293131286	-0.819435946056967	0.452039329101319	0.916579721867149	-4.73480688779262
Q9Y6G3	MRPL42	0.0990425547960625	3.2630366312415	1.04838484677957	0.345310631686898	0.915639186619765	-4.73504667867162
Q86YB8	ERO1LB; ERO1B	-0.124449502007555	3.25160886424176	-0.875172543178301	0.423904967127739	0.915639186619765	-4.73546950381721
Q7Z4G1-1	COMMD6	-0.103112010610296	3.35986637276928	-1.07914223804389	0.332721826812642	0.915639186619765	-4.73560395659688
Q9NQ89	C12orf4	-0.0707287037155005	3.37658674939964	-0.849647640607827	0.436615806205125	0.915639186619765	-4.7356566344983
P55197	MLLT10	0.074871148020382	3.27488472793776	0.861231285199372	0.430811098709211	0.915639186619765	-4.73587762631547
Q86YD1-1	PTOV1	0.0439328319071019	3.23464943537423	0.25670189669877	0.808254892264522	0.968596116640421	-4.73599008776632
B2RTY4-4	MYO9A	-0.0429631576476679	3.21313406118271	-0.311609101107422	0.768671156470492	0.965121087239875	-4.73618402010683
P11217	PYGM	0.0440345520710425	3.10368884359117	0.162663765608648	0.87753790217091	0.97803079063916	-4.73645246634028
Q9Y6C2	EMILIN1	-0.137484626772965	3.37755233166258	-1.31538079046698	0.248841681684164	0.915639186619765	-4.73645305748285
P78346-2	RPP30	0.0715336041847916	3.28929466816663	1.41007205400707	0.221084554862714	0.915639186619765	-4.73649043777699
Q9NV06	DCAF13	-0.069401604830872	3.25275824941372	-1.28756436311039	0.257599784489959	0.915639186619765	-4.7365451295756
Q96IJ6-2	GMPPA	-0.075285423805645	3.35052617790888	-1.5223374498604	0.192021106503867	0.915639186619765	-4.73670385063121
Q8N573-1	OXR1	0.0600660445782207	3.35144764665481	0.441808827776083	0.678193511371658	0.945520249671123	-4.73695829925845
Q9Y222-1	DMTF1	-0.093256635637946	3.27730738521345	-0.743961830850791	0.492361023635698	0.919407291326043	-4.73736782681849
P62277	RPS13	0.282561854222742	3.28529794540262	1.43756821088627	0.213594984388333	0.915639186619765	-4.73764219632507
Q8IYR2	SMYD4	0.0724208600606681	3.20929778102212	0.745223459228496	0.491666073319718	0.919407291326043	-4.7378984019176
Q8WVC6-1	DCAKD	0.145000269369315	3.17734170122254	1.11672775957526	0.317880209882278	0.915639186619765	-4.7382581707806
Q5JPE7	NOMO2	0.145170680934627	3.34489786447107	0.887944467364389	0.417654726702942	0.915639186619765	-4.73837531054274
Q6PJT7-1	ZC3H14	-0.0804745383722858	3.22571114119947	-1.33198162173147	0.243748437527133	0.915639186619765	-4.73837610968245
Q96MG2	JSRP1	0.211316553819553	3.44915903070242	1.1064910442696	0.321863955296365	0.915639186619765	-4.73850004247519
A4UGR9-8	XIRP2	-0.0561897848351932	3.2987820872094	-0.350291474849587	0.741255296971336	0.958215020431023	-4.73873004389604
Q86XA9	HEATR5A	-0.0376235147541427	3.03910257936095	-0.20169790537795	0.848582536114253	0.973242076055282	-4.73889753777792
O60337	MARCH6	0.0537898866878946	3.36001612315016	0.26675619943116	0.800952465640166	0.968596116640421	-4.73892114751355
Q96B01	RAD51AP1	-0.0668475697245505	3.33860146648246	-1.15746849469593	0.302453170906799	0.915639186619765	-4.73892337027981
Q96HR3	MED30	-0.126011797877705	3.31859715408828	-0.776229395112371	0.474809986049889	0.919361692717421	-4.73900368573141
Q96RR4-1	CAMKK2	-0.0937840079405021	3.3126436129453	-1.05683529556557	0.341811764752318	0.915639186619765	-4.7394723545944
Q1RMZ1	C7orf60; BMT2	0.0177343321709342	3.33524847925098	0.116959036672612	0.911720495992917	0.983261662600826	-4.73989934305091
P02792	FTL	-0.156467428910061	3.34597100579915	-1.05722333182635	0.341651833215182	0.915639186619765	-4.73999560523218
Q6QNY0	BLOC1S3	-0.0926452147792894	3.33839932052965	-1.04826347452696	0.345361107917139	0.915639186619765	-4.74005733572262
Q6PJW8	CNST	0.319786535426877	3.44961522515977	1.27131284208517	0.262848495735062	0.915639186619765	-4.74029070535484
Q8TCE6-1	FAM45A	-0.131834926005019	3.29454259860246	-1.29236818455023	0.25606704225385	0.915639186619765	-4.74068572087145
Q7L591-1	DOK3	-0.0729093039488777	3.40504558327309	-1.14808265724817	0.305947118822869	0.915639186619765	-4.74103418909584
O43502	RAD51C	-0.0706357477506867	3.05435683472163	-0.665347798474178	0.537049851735697	0.920438179462333	-4.74114825633297
Q9NUT2-1	ABCB8	0.421078495419406	3.3898479768541	1.29195805382966	0.256197569552477	0.915639186619765	-4.74131454976414
Q9ULH7-5	MKL2	-0.0722677643618936	3.30718124008212	-1.29667091327458	0.254701392379673	0.915639186619765	-4.74144865575921
P39019	RPS19	-0.104233317520156	3.31261937592585	-1.8315014688229	0.130187389922173	0.915639186619765	-4.74146763244235
P20674	COX5A	0.135222447822631	3.26859199290685	1.4958881940337	0.19851346311985	0.915639186619765	-4.74157200541374
Q53HL2	CDCA8	-0.123985719477982	3.27302937897219	-1.26164173643211	0.26601875342048	0.915639186619765	-4.74172364380231
Q9NY12-1	GAR1	0.0787505641677547	3.33825953267224	1.2728039195034	0.262362828973762	0.915639186619765	-4.74181097244773
Q15013-3	MAD2L1BP	0.0783165311673895	3.30814275963567	0.892647259457113	0.415371744874147	0.915639186619765	-4.74181188107238
Q9NPE2-2	NGRN	-0.0121645808255089	3.21049437960557	-0.0586737006387292	0.955622192009138	0.994131178344556	-4.74224922271227
Q9P0K8	FOXJ2	0.0911545482667864	3.28920830988466	0.688117381715547	0.523827646028957	0.920438179462333	-4.74253268383873
Q9Y266	NUDC	-0.0462745042911774	3.31209179125693	-2.15721900593122	0.0869306961390771	0.915639186619765	-4.74260404798958
Q68D91-1	MBLAC2	-0.0699406650969243	3.32605532130356	-1.06203434286317	0.33967428003257	0.915639186619765	-4.74277969749176
O15213	WDR46	-0.185426439093984	3.24380952069074	-1.33181374728076	0.243799448716466	0.915639186619765	-4.74313180117314
Q6P2H3-1	CEP85	-0.0507694667025457	3.33010717484011	-1.39224629056127	0.226074088626318	0.915639186619765	-4.74364322360519
Q4ZIN3-1	C19orf6; TMEM259	0.410797630911938	3.37254118704625	1.18872467374286	0.291073632773455	0.915639186619765	-4.74398005575191
P09525	ANXA4	-0.073505060173468	3.37682837668418	-1.58742560653074	0.176922349400827	0.915639186619765	-4.74455548174472
Q99081-3	TCF12	-0.0847940803241863	3.2013016643217	-0.888685635629849	0.417294266275293	0.915639186619765	-4.74471068610078
Q9NQS7	INCENP	-0.264617235961944	3.13899794558628	-1.38738466886552	0.227453465187364	0.915639186619765	-4.74488307955717
P62341	SELT; SELENOT	0.195992182795586	3.38967655539393	0.840800921852489	0.441089663851813	0.915639186619765	-4.74520800154299
O14975	SLC27A2	0.313506489188656	3.39599444946625	1.26419780857883	0.265177439014279	0.915639186619765	-4.74539650436437
Q9UGN4-1	CD300A	0.128487927304065	3.40447796926121	0.930989745302529	0.397127671441833	0.915639186619765	-4.74553236832691
Q9NWF9-1	RNF216	-0.00466708956868952	3.33651378951242	-0.0322661647950468	0.975583671678861	0.99730120039696	-4.74583700470205
Q96FF7	LOC113230; MISP3	-0.0813794703509588	3.36932188718577	-0.591004630175818	0.581764067815104	0.928598108013809	-4.74616537677611
O75907	DGAT1	0.313538417354413	3.36539120720564	0.926434956941007	0.399260556482942	0.915639186619765	-4.74670302788637
Q9Y4B5	SOGA2; MTCL1	0.0662594458628284	3.37847470440199	0.574381662057556	0.59207760307853	0.931483552071724	-4.7474266583476
Q7L775	EPM2AIP1	-0.0594370971256738	3.28856066396006	-0.480729618261209	0.652228368727807	0.941255563430779	-4.74748118085963
Q4VC44	FLYWCH1	-0.102259153688754	3.34827989768967	-1.1650686309714	0.299650087500197	0.915639186619765	-4.74758082993255
P07686	HEXB	-0.077289403278869	3.34606417993807	-1.79942598623275	0.135526941306862	0.915639186619765	-4.7482531030036
P55055	NR1H2	0.0448609055650857	3.405105043703	0.264169642958444	0.802828877866362	0.968596116640421	-4.74837412604714
Q9NQC1-1	PHF15; JADE2	-0.0834327770755693	3.37262598618549	-0.695647630382105	0.519504540166574	0.920436512356423	-4.74877549614375
Q9H469	FBXL15	-0.0388665028336782	3.36500819957824	-0.237143688326769	0.822523937448056	0.971778849981976	-4.74888581335422
Q9NUV7	SPTLC3	0.0837951128600749	3.40371012144254	0.697050010867439	0.5187021754635	0.920436512356423	-4.74892375673167
Q96GQ7	DDX27	-0.159311656947628	3.22207172357812	-1.759404734937	0.142507108177046	0.915639186619765	-4.74900899163609
Q9BSG0	PRADC1	-0.0778824597890414	3.28052321288572	-0.927426020644434	0.398795680942213	0.915639186619765	-4.74904620794121
P78337	PITX1	0.0755962664027513	3.39991537525569	1.12600963898797	0.31430558355448	0.915639186619765	-4.74941584990689
Q9H8M1	COQ10B	0.0870889191117657	3.29625139613561	0.90971730294952	0.407168323542754	0.915639186619765	-4.74947418038358
Q9NS23-4	RASSF1	0.0839652798916359	3.30943366922467	0.702797045287244	0.515423044769055	0.919864772915539	-4.74958464923526
P42768	WAS	-0.0510757438759753	3.41372655329676	-1.62571727837441	0.168597428524262	0.915639186619765	-4.7502679948423
Q96RD7-1	PANX1	0.2425354782056	3.31399335660576	1.00756293130906	0.362645672765252	0.915639186619765	-4.75028762216342
Q93086-4	P2RX5	0.177678353473122	3.48081937416448	0.727218184105271	0.501650987381711	0.919407291326043	-4.75029732251049
Q9H490	PIGU	0.337078197459379	3.39790823534199	1.00600408202812	0.363321956232012	0.915639186619765	-4.75064840511676
Q9Y5L4	TIMM13	-0.157513256569418	3.34381599420776	-1.62035965095265	0.169738213820539	0.915639186619765	-4.75070047080411
O95478	NSA2	-0.0743293571909295	3.26992826016874	-1.30025781966968	0.253568128473749	0.915639186619765	-4.75090073110633
Q9H7N4	SCAF1	-0.135041308372969	3.32552600284878	-1.55162583393435	0.185075369867889	0.915639186619765	-4.75095362006008
O00488	ZNF593	-0.131626014089013	3.34998268860138	-0.87509643406651	0.423942432455522	0.915639186619765	-4.75107580919128
Q15293	RCN1	-0.169227037381156	3.27373351446444	-1.72916135700315	0.148025639069113	0.915639186619765	-4.75119407521446
A4D1U4	KIAA1147	0.0929857948422302	3.35739185427327	0.874446154246865	0.424262644073706	0.915639186619765	-4.75120040328651
P43378	PTPN9	0.0704705094407524	3.16391764143063	1.11569982401621	0.318278279044731	0.915639186619765	-4.75139217471472
Q96MG8-1	PCMTD1	-0.101389389986483	3.38157859430966	-0.591603214065272	0.58139479562403	0.928598108013809	-4.75186125572828
P17931	LGALS3	-0.0804123624730571	3.33786245639076	-1.35098630418318	0.238038156372911	0.915639186619765	-4.7525641988927
Q96GC9	VMP1	0.354367753454924	3.30469161492214	0.98606420078056	0.372066200806662	0.915639186619765	-4.75267753687
O14576-1	DYNC1I1	-0.0729094679893443	3.38362011567942	-0.622330146335483	0.562638766508344	0.924506518923753	-4.75309379384511
Q9Y5S1	TRPV2	0.31193261098165	3.44479837836053	1.00612938874883	0.363267554644224	0.915639186619765	-4.75334279696287
Q96RG2-1	PASK	0.0704534536355824	3.29350486906655	1.3621615221774	0.234739637643689	0.915639186619765	-4.75348156988652
Q96KG9	SCYL1	-0.123051078124535	3.3446694246986	-1.82105174389615	0.131902645534453	0.915639186619765	-4.75351735234415
Q7Z628	NET1	-0.179120614095747	2.9417891708455	-0.649092281435298	0.546626475183488	0.922972784208594	-4.75368227458082
P40425	PBX2	-0.0923053507369128	3.19628297793336	-0.953463293774935	0.386739008947638	0.915639186619765	-4.75397648230624
Q13813-3	SPTAN1	-0.170438686118746	3.33783269873568	-1.16396465884088	0.300055808124346	0.915639186619765	-4.75416693336222
Q8IXI1	RHOT2	0.358412725062793	3.26263271941627	1.17535122524738	0.295894661666762	0.915639186619765	-4.75430220938577
Q9BU70	C9orf156; TRMO	0.0796140391701413	3.3948886179883	0.672216495681473	0.533037530750126	0.920438179462333	-4.75440635263897
Q9Y4G8	RAPGEF2	-0.104102564140385	3.30121689029159	-1.09225460668337	0.32747686280347	0.915639186619765	-4.75442102313727
P45954	ACADSB	0.092632019746727	3.21602049198146	1.449023786203	0.210547393375137	0.915639186619765	-4.75457447517457
Q2KHR2-1	RFX7	0.0707171670016691	3.31033491653673	1.1049252583637	0.322477143636862	0.915639186619765	-4.7546719938499
Q8WZ82	OVCA2	-0.142725239854975	3.31183450851778	-1.3916938971331	0.226230414710854	0.915639186619765	-4.75470403254915
O95825-1	CRYZL1	-0.0780447935260197	3.27114380767097	-1.26874836360147	0.263685731236914	0.915639186619765	-4.75496579808243
O75717	WDHD1	0.0858096435524567	3.13793447871713	1.66229338992406	0.16101246123927	0.915639186619765	-4.7550701297724
Q8NDI1-2	EHBP1	-0.0500658000234802	3.25321957285526	-1.43085717797619	0.215400105985808	0.915639186619765	-4.75567735442331
P57721-1	PCBP3	-0.0983086896009435	3.36871712718434	-0.594444116770284	0.579644228459226	0.928540265447916	-4.75585409029646
Q2M2Z5	PLK1S1; KIZ	-0.0579641800380877	3.2523672086496	-0.45432704503316	0.669783467183009	0.944729459280346	-4.75603431661126
Q6P4F7	ARHGAP11A	-0.138030964265245	3.34611508836174	-1.08526090319038	0.33026534287685	0.915639186619765	-4.75606144246544
A8K855-1	EFCAB7	-0.0592582326291409	3.28543422832667	-0.418094763788403	0.694273250635486	0.949736349032924	-4.75647477358379
Q9NV66	TYW1	0.249191590443229	3.37688832950926	0.896215415179814	0.413646191446722	0.915639186619765	-4.75647951095795
Q8N3Z6	ZCCHC7	-0.0194990356952685	3.22884081393849	-0.139013495443678	0.895193086793983	0.980724814853327	-4.75655478267208
P02774-3	GC	-0.194916257358876	2.97906590179919	-0.875616578006829	0.423686439257811	0.915639186619765	-4.75655662850712
Q9H999	PANK3	-0.116073803242703	3.24147534993492	-0.950564854586385	0.388066251315675	0.915639186619765	-4.75660173476303
Q9P086	MED11	0.0642378795556398	3.22381283872075	0.629601447755969	0.55825815152626	0.924303117665659	-4.75692138183487
O14920-1	IKBKB	0.0527496827176561	3.37188358086092	1.50532861559902	0.196171845024135	0.915639186619765	-4.75705500027827
Q7Z736	PLEKHH3	0.0887276121957934	3.32490826030106	0.880446962459345	0.421314929276422	0.915639186619765	-4.75739699869532
Q8IWT3	CUL9	0.0670177205055593	3.34993852995259	1.05591472904688	0.342191439084321	0.915639186619765	-4.75776487425041
O75132	ZBED4	0.0514621268105557	3.21607161552121	0.380544949950334	0.720114848219285	0.954078111487525	-4.75800253565525
P04083	ANXA1	-0.357041717064986	2.36884266430898	-0.819261681792582	0.452129484856026	0.916579721867149	-4.7581756620574
Q9BQA9-1	C17orf62	0.281816598838191	3.43755654063288	1.10442475730357	0.322673363894748	0.915639186619765	-4.75842522684897
Q709F0-1	ACAD11	-0.0766124068018276	2.92980793582353	-0.509464679548985	0.633413183186724	0.940139315483278	-4.75843549915451
Q6P9B6	KIAA1609; TLDC1	-0.0833576819964729	2.98983241956572	-1.08291740263533	0.331204331312828	0.915639186619765	-4.75874889838714
Q9H4G0-1	EPB41L1	-0.0818407689915736	3.37909542121557	-1.13832854431497	0.309616143365441	0.915639186619765	-4.75903029860277
Q9Y5P8-1	PPP2R3B	0.0302598247540081	3.13649314578349	0.217742967585727	0.836756659815414	0.972191556220765	-4.759041577366
Q9Y619	SLC25A15	0.197207051231375	3.35140921006765	0.87165741057304	0.425638035249094	0.915639186619765	-4.75940376800941
Q12857-4	NFIA	-0.0320131357213922	3.31746659469686	-0.211080973047605	0.841661010583924	0.973148950642076	-4.75961692183519
P48380	RFX3	-0.164455321831584	3.06406026762312	-0.509064597806966	0.633673019430047	0.940139315483278	-4.75968873511431
O75167-4	PHACTR2	-0.0377715947963649	3.31255135618743	-0.295694197609087	0.780067888496505	0.966219013315205	-4.75974240501527
P25445-1	FAS	0.332001908633571	3.4826687008687	1.07305573864642	0.3351810882456	0.915639186619765	-4.75988157764661
Q6UUV7-1	CRTC3	0.0280717010331874	3.3425796265643	0.170337358593286	0.871826486764481	0.977550899754936	-4.75995661287522
Q6ZW49	PAXIP1	0.0737500827750766	3.29718644187811	1.4173045941527	0.21909038152562	0.915639186619765	-4.75995894654514
Q9NX31	C20orf111; OSER1	0.069644991224809	3.34381734502747	0.916139121951417	0.40411591679614	0.915639186619765	-4.75999966423991
Q13445	TMED1	0.12182970935185	3.40133239913609	1.25468074338176	0.268322412953574	0.915639186619765	-4.76002003674334
Q93063-3	EXT2	0.147016976453878	3.25456118753099	0.940896552754383	0.392520474259119	0.915639186619765	-4.76023530878525
P62699	YPEL5	-0.149967912840086	3.34800810453336	-0.748217866588621	0.490019481823388	0.919407291326043	-4.76026724243165
Q8N0U8	VKORC1L1	0.236595514758837	3.37391688396017	0.868580064998999	0.427159819104123	0.915639186619765	-4.76030138153244
Q6Q0C0-1	TRAF7	0.0894774641524176	3.36099726701459	1.26255665451372	0.26571733150011	0.915639186619765	-4.76045154888129
Q96BT7-4	ALKBH8	-0.0908300924624978	3.25021903851774	-1.10241178840435	0.32346359888009	0.915639186619765	-4.76076362784106
Q96H20-1	SNF8	-0.122167530848403	3.30662311284616	-1.42250604436101	0.217666923072838	0.915639186619765	-4.76082244318816
Q14241	TCEB3; ELOA	-0.451724027619802	3.22769430008383	-1.3039936450363	0.252392816035236	0.915639186619765	-4.76087109290369
Q96NT3-3	GUCD1	0.088957435936454	3.35445824574988	0.434707227395052	0.682988760705071	0.94798365087427	-4.76178317369282
P36508	ZNF76	0.0735318967930558	3.31327897917064	0.594387569740735	0.579679040329083	0.928540265447916	-4.7618673837495
Q10570	CPSF1	0.0394958716990026	3.31524750668863	1.7586197441397	0.142647651393736	0.915639186619765	-4.76203823112579
Q13153	PAK1	-0.0869251876412628	3.35390058045502	-1.53990728133207	0.187824165327602	0.915639186619765	-4.7622411720801
Q92930	RAB8B	0.227555972940327	3.42120185044043	0.985002197182392	0.372536805544938	0.915639186619765	-4.76239464510624
Q9Y5V3-2	MAGED1	0.0659684480497226	2.92061295620164	0.77790437000417	0.473911636335324	0.919361692717421	-4.76299031950528
Q9H668	OBFC1; STN1	0.0679740745588309	3.33465860099508	0.693651784023823	0.520647937948206	0.920436512356423	-4.76301549645844
Q96ME7	ZNF512	-0.309397904064641	3.03994293352273	-0.961430636289339	0.383109802823356	0.915639186619765	-4.76392774194014
Q99584	S100A13	-0.346808728579881	1.19557073134503	-0.889310727934299	0.416990449890651	0.915639186619765	-4.76449840835881
Q9H869-9	YY1AP1	0.0641629022512986	3.36478006493871	1.09458565859367	0.326552007135175	0.915639186619765	-4.76489595295225
Q5BJH7	YIF1B	0.132698038601081	3.34836061216266	0.843186444520702	0.439879817864193	0.915639186619765	-4.76515656963725
O15211	RGL2	-0.0752129394753147	3.28108295264248	-0.84562396643601	0.438646244892179	0.915639186619765	-4.76529928028907
Q9Y227-1	ENTPD4	0.0985737506523479	3.37547886843435	0.609968943786241	0.570136844874338	0.926551027367845	-4.76588136738663
A8MPS7-1	YDJC	0.0692527864029534	3.2652182092661	0.497504238574825	0.64120714162621	0.940269285779098	-4.76607824729703
Q96F63	CCDC97	0.0685215518113969	3.33876283768774	1.09829622455352	0.325084520376514	0.915639186619765	-4.76672113063454
Q9H0U4	RAB1B	0.0673208583685095	3.38302937621542	1.49600526843238	0.198484256953198	0.915639186619765	-4.76707934743363
Q96FA3	PELI1	0.094560015542252	3.3917826391808	1.0152840816957	0.359311561624708	0.915639186619765	-4.76725585089558
Q9Y2K1	ZBTB1	-0.171636754116617	3.36426043764653	-0.941642579642126	0.39217529897014	0.915639186619765	-4.76727596966237
Q96P47-4	AGAP3	-0.0662172388210231	3.21039378031393	-0.821721102611856	0.450858365598569	0.916541489048734	-4.76736743843293
Q8TEJ3	SH3RF3	-0.079848239388701	3.40664101292055	-0.729009075698603	0.500651398823962	0.919407291326043	-4.76777217879472
P78316	NOP14	-0.205383481445483	3.18132547973117	-1.44240504624134	0.212303047192591	0.915639186619765	-4.76779537095095
Q5UCC4-1	EMC10	0.225980444111509	3.26717004890001	1.03683172343762	0.35014368483927	0.915639186619765	-4.767839684214
Q8IWS0-1	PHF6	0.0885231087578363	3.29356186528168	1.43573422964205	0.214086830531364	0.915639186619765	-4.76789490883124
Q9Y3C6	PPIL1	-0.0978112506874951	3.27242852624484	-1.47997423834125	0.202522787034447	0.915639186619765	-4.76791055058911
Q96B23-2	C18orf25	0.0682184807563926	3.33673885844846	1.19764305721859	0.287898087221562	0.915639186619765	-4.76793140253632
Q96BP2	CHCHD1	-0.124419860751104	3.26782762165212	-0.797569703913365	0.46345847724876	0.919361692717421	-4.76805952974168
Q9NQ66-1	PLCB1	-0.0519729534494754	3.20291109521609	-0.397713975856209	0.708242879333535	0.953117503647409	-4.76810954689933
O00743-3	PPP6C	-0.0777533612114817	3.36347514375407	-1.51905467517801	0.192815441695304	0.915639186619765	-4.76812276286564
Q05BQ5	MBTD1	-0.0680455593435686	3.298804488111	-0.429901442737666	0.686243615161702	0.948308276509856	-4.76823519178059
Q8NBI6	XXYLT1	0.161284234778537	3.27608058759109	0.914328509003431	0.404974668084643	0.915639186619765	-4.76842266239886
Q9H1A3	METTL9	0.0853667077627832	3.2814676364218	0.844856062067025	0.439034574921741	0.915639186619765	-4.76844137889473
Q9Y6D6	ARFGEF1	0.0551765003396534	3.36258522635577	1.78091495139297	0.138710728374683	0.915639186619765	-4.76871096198425
Q9NQX7	ITM2C	0.180563635404999	3.37320804130683	1.29402810388226	0.255539391978001	0.915639186619765	-4.7689068441127
Q8N3R9-1	MPP5	0.0676294748506682	3.17243274513398	1.03791996815408	0.349685988280087	0.915639186619765	-4.76970850843125
Q5HYJ3-1	FAM76B	0.0609934084849429	3.32541474700624	1.13140411406785	0.312244396129814	0.915639186619765	-4.76977543339464
Q92547	TOPBP1	0.094994809607598	3.29269923723025	1.68153503189944	0.157161277866296	0.915639186619765	-4.77022544433505
Q99487	PAFAH2	-0.0945523975684017	3.28764676916418	-0.742969176523957	0.492908311081027	0.919407291326043	-4.7702666849319
O60308	CEP104	-0.0676264834296283	3.38495811249132	-0.617963215595813	0.565280343576777	0.92612322987493	-4.77047932147868
Q9H9B4	SFXN1	-0.126945296870451	3.27058611207419	-1.47692208172091	0.203300718403331	0.915639186619765	-4.77090214103474
Q9Y285	FARSA	-0.0543888211878918	3.33523435632293	-1.88988853630227	0.121020192773028	0.915639186619765	-4.77113777503814
Q9UBU7	DBF4	0.0750531112321874	3.28117236209967	0.895310413059934	0.414083308607472	0.915639186619765	-4.77117393369504
Q6PJ69	TRIM65	-0.086444369774004	3.34272768845485	-1.24037942397956	0.273112956235405	0.915639186619765	-4.77131403133682
Q15262-4	PTPRK	0.0635618884869274	3.30934071254215	0.781925430148109	0.471760126498664	0.919361692717421	-4.77148080828304
Q99459	CDC5L	-0.0989518439443536	3.26915571465111	-1.7904960178808	0.137053343903816	0.915639186619765	-4.77152387409335
Q12899	TRIM26	0.0766193288938582	3.3748320448227	1.30638688969162	0.251642562221036	0.915639186619765	-4.77229874290328
Q8WXH0-2	SYNE2	0.319689554843428	3.34521099941275	1.75941763748494	0.142504799315668	0.915639186619765	-4.77264641136187
P28799	GRN	-0.0638291394347806	3.20055976598475	-0.412682261307895	0.697969847018048	0.950935785746387	-4.77393322987914
Q96AD5-1	PNPLA2	-0.0814149031569837	3.23129051578337	-0.981168108712532	0.374239923583046	0.915639186619765	-4.77395010278004
Q96JA3	PLEKHA8	-0.0842544368358474	3.32367293781583	-1.10535514389742	0.322308691406806	0.915639186619765	-4.77454912572128
Q9H213	MAGEH1	0.0990281310809162	3.4481839060728	0.856803749649898	0.433022665605942	0.915639186619765	-4.77505505782073
Q6ZVD8-1	PHLPP2	-0.00779842582077587	3.36296386705362	-0.0504781999153353	0.961813955675875	0.995730418891197	-4.77545567298299
Q9NVH0	EXD2	0.129723012620794	3.28258932189189	1.31211291961176	0.249855970959106	0.915639186619765	-4.77549043757522
Q9UP95	SLC12A4	0.113101025400615	3.35528045385745	0.863950928241991	0.429456999731773	0.915639186619765	-4.77589240535317
Q8IYB1	MB21D2	0.0684210594810794	3.36742135780917	0.805817682834209	0.459125914531901	0.919361692717421	-4.77607854407846
Q9NXJ5	PGPEP1	-0.0728103597045368	3.36783986380261	-0.851990724849433	0.435436787871049	0.915639186619765	-4.77618643908705
Q9Y4J8-1	DTNA	-0.0629022007694566	3.25724439052073	-0.721584386712135	0.504804755436658	0.919407291326043	-4.77656113862694
Q5VWQ8-1	DAB2IP	-0.0470776691627648	3.06628597085988	-0.334605949053388	0.752322023800724	0.960006860436046	-4.77672300195009
Q9HCD5	NCOA5	0.0538311563582686	3.29581567894328	1.69429910879491	0.154658123932492	0.915639186619765	-4.77685244046161
Q5TEU4	NDUFAF5	-0.0788743509249435	3.28778083651168	-0.560808750371087	0.600582033281797	0.934128354033019	-4.7770908226901
Q9H6A9-1	PCNXL3; PCNX3	0.0174237302559004	3.34955321021874	0.116908661940883	0.911758309065776	0.983261662600826	-4.77730604789008
Q53QZ3	ARHGAP15	-0.0975048889924639	3.39677004824373	-1.28974148819127	0.256904080910615	0.915639186619765	-4.77750788781913
Q9UBC3	DNMT3B	0.0490071656355587	2.77878516930679	0.390521517835911	0.713204940118733	0.953117503647409	-4.77759586379695
Q5JVS0	HABP4	-0.152222204977537	3.1207272034051	-1.02293165689695	0.356034747646466	0.915639186619765	-4.77764193276809
O43252	PAPSS1	0.0399359296928529	3.35735971423253	1.74935940156102	0.144316359718401	0.915639186619765	-4.77772106452525
P31785-1	IL2RG	0.236350365266234	3.49455482334933	1.08801730559471	0.329163873985071	0.915639186619765	-4.77785294416631
O43766-1	LIAS	0.0876401436106663	3.29984484913252	0.830014232756364	0.446592229151059	0.915800172163947	-4.77788548187439
Q9BSM1	PCGF1	-0.0655354568054782	3.19939505527953	-0.868155223843705	0.427370242448051	0.915639186619765	-4.77800726610702
Q9UBV7	B4GALT7	0.0548934867073483	3.35518562817212	0.498313530505812	0.64067807098861	0.940139315483278	-4.77808394063159
P41219-2	PRPH	-0.233944222663537	2.06212989497819	-1.14483610500259	0.307164005248334	0.915639186619765	-4.77843177829094
Q8WUB8	PHF10	0.0562015152739655	3.2292901891031	1.26068480940645	0.266334352738367	0.915639186619765	-4.77865168804192
Q6ZU35	KIAA1211	-0.0492054321696459	2.92426584960938	-0.388261912538612	0.714767232354447	0.953117503647409	-4.77865515799223
Q9Y5J6	FXC1; TIMM10B	-0.119430517006528	3.3395128360032	-0.965684885301659	0.381183446140755	0.915639186619765	-4.77869243142307
Q5VT66-2	MARC1	0.0958713543770793	3.05111078781101	0.885156949988206	0.419012616964116	0.915639186619765	-4.77886364351386
Q6UWP7-1	LCLAT1	0.312604291838378	3.3276772034917	1.12967490424436	0.312903810080424	0.915639186619765	-4.77914952790564
P35222	CTNNB1	-0.0795431744549233	2.70857614666888	-1.23844489069158	0.273766963622401	0.915639186619765	-4.7794682234816
Q9NY74	ETAA1	-0.110811892472772	3.33644919461735	-0.63812777799116	0.5531499438892	0.923936978196585	-4.77977337565693
Q15102	PAFAH1B3	-0.100926882731581	3.30038368912839	-1.2814183961964	0.259573194285604	0.915639186619765	-4.77991697984415
Q96F46	IL17RA	0.0362306901010868	3.28875386716313	0.206986589068073	0.844679296431532	0.973148950642076	-4.78002373526473
Q9ULG1	INO80	-0.230944083379459	3.30273974480854	-1.06395468556473	0.338887682272951	0.915639186619765	-4.78015518266624
Q9Y2E5	MAN2B2	0.0635870416390636	3.36699371730418	0.810768068496072	0.456540217779877	0.918408666335944	-4.78015752362038
P68402-1	PAFAH1B2	-0.117649793488403	3.30956913139975	-1.35743482661366	0.236129469188733	0.915639186619765	-4.78067434218459
Q8TC44-1	POC1B	0.0266030235056622	3.40134064960768	0.222947022983688	0.832931522037585	0.972191556220765	-4.78068230067771
Q9P015	MRPL15	0.057306413990907	3.2943546672869	1.42552231886459	0.216845552811133	0.915639186619765	-4.78075373297595
Q9Y672	ALG6	0.317614390209765	3.36388202769421	1.04881311779052	0.345132572992995	0.915639186619765	-4.78084766577363
Q9C005	DPY30	-0.0683806882522012	3.39426879790873	-0.867753683110605	0.427569199695188	0.915639186619765	-4.78115605045183
Q7Z4L5	TTC21B	-0.0612590124802219	3.21737721503816	-0.749360093596413	0.489392435682573	0.919407291326043	-4.78136822016496
Q9BTY2	FUCA2	-0.0900246240435351	3.19593863498365	-1.1439045964075	0.307513950170639	0.915639186619765	-4.78154169219871
O14526-1	FCHO1	-0.124671924176672	3.40018488550724	-0.964739394097075	0.381610880768253	0.915639186619765	-4.78191993298214
Q13601	KRR1	-0.172551841932423	3.2276736121275	-1.36754707292829	0.233165532823797	0.915639186619765	-4.78192946640688
P23634-1	ATP2B4	0.251474354816915	3.30582319418002	1.20891164192259	0.283930535886678	0.915639186619765	-4.78202398130527
P61599	NAA20	-0.0920717501617211	3.25291167024125	-0.702055928643804	0.515845095740854	0.919864772915539	-4.7820746482942
Q5VYV7	SLX4IP	0.030186522161434	3.26108325759523	0.262536628226005	0.804014335228595	0.968596116640421	-4.78220822008572
Q5J8M3-1	EMC4	0.212168051646691	3.22753151742827	0.895728740819391	0.4138812101516	0.915639186619765	-4.7822763993147
Q15257-1	PPP2R4; PTPA	-0.0617933586346634	3.34516026088221	-1.34890804889247	0.238656398844317	0.915639186619765	-4.78231062202511
Q96DU3-1	SLAMF6	0.216187136948492	3.43457539608551	1.00180332052813	0.365149668283602	0.915639186619765	-4.78253893882771
O00628	PEX7	0.0504382385679838	3.1950371758548	0.426541892959784	0.688523634672086	0.948308276509856	-4.78267028507883
Q9H2K8	TAOK3	-0.0955591905775856	3.28812898806055	-1.1199372408963	0.316640150648367	0.915639186619765	-4.78302209819457
Q12766-1	HMGXB3	-0.0186676702360536	3.3248929569247	-0.126512848319757	0.904554062410108	0.981658398204992	-4.78320474860697
Q9Y4A5	TRRAP	0.0494638059704846	3.30178497496588	1.99608619561973	0.106034337085641	0.915639186619765	-4.78358690042516
Q06136	KDSR	0.277184695934319	3.37623666614645	1.01853050320407	0.357917444225184	0.915639186619765	-4.78375941188297
Q96AV8	E2F7	-0.0145946643819709	3.28925275973122	-0.12399954847588	0.906438337565906	0.982478252695933	-4.78383540775568
Q9Y365	STARD10	-0.129069139152058	3.21235343895239	-1.06600476321331	0.33804967515557	0.915639186619765	-4.78394041603705
Q86VU5	COMTD1	0.281210765446557	3.4230860818556	1.17091505605682	0.297509642209448	0.915639186619765	-4.78398050797594
Q9H1Y0-1	ATG5	-0.0805318027838416	3.29469239697914	-1.31374901605012	0.24934767272314	0.915639186619765	-4.78479854258031
Q86T82	USP37	-0.0736448607027611	3.31883843632611	-0.833597293860119	0.444758610905667	0.915639186619765	-4.78487598260097
O15297	PPM1D	0.0822570096351209	3.2922943421886	0.851891308716124	0.435486762974186	0.915639186619765	-4.78492086659242
O15525	MAFG	-0.0805991066729719	3.32484371683946	-1.01154234384648	0.360924062938427	0.915639186619765	-4.78493792045092
Q6PL24	TMED8	-0.0864481143695266	3.30288059332158	-1.03068683543093	0.352737693745966	0.915639186619765	-4.78503945265931
Q9UH17-1	APOBEC3B	0.104722931667	3.39632396093041	1.31796110850897	0.24804352278304	0.915639186619765	-4.78506222064172
Q96AA3	RFT1	0.169814625602124	3.37041729341483	0.821371077285314	0.451039105511494	0.916541489048734	-4.78541107404113
Q9P2N7-5	KLHL13	-0.0338629850146942	2.99359836589507	-0.263433242810482	0.803363378742838	0.968596116640421	-4.7855633622124
P57088	TMEM33	0.303737050294053	3.32799119577336	1.14298967187611	0.307858009401617	0.915639186619765	-4.78580952662038
Q8N8S7	ENAH	-0.194498105146624	2.08465937698543	-1.3451548485409	0.239776752598913	0.915639186619765	-4.78583878975931
Q14534	SQLE	0.0704982432105088	2.825563811575	0.258350507211437	0.80705594048596	0.968596116640421	-4.7860411410733
Q3SXM5	HSDL1	0.235211200539676	3.23065292560069	1.071528159189	0.33580077183429	0.915639186619765	-4.78605392281759
Q8IWU5-1	SULF2	-0.10692385685931	3.29415992111594	-1.24292815275487	0.272253494252085	0.915639186619765	-4.78611198054974
Q8TAV0-3	FAM76A	-0.0315580870413487	3.19862317705884	-0.258814366350382	0.806718708870913	0.968596116640421	-4.78614595552265
P83916	CBX1	-0.0778311737019896	3.15283763617483	-1.38427009576726	0.228341373082806	0.915639186619765	-4.78619002874811
Q96HY6-1	DDRGK1	0.363640667168455	3.39218526844512	1.13361036168416	0.311404852944615	0.915639186619765	-4.78633623954328
Q9HB20	PLEKHA3	-0.0738145576964515	3.40123997496661	-0.745854601446527	0.491318683241821	0.919407291326043	-4.78662597353288
O60303	KIAA0556	-0.0200639697081383	3.33581818970698	-0.153203961069098	0.884590583405136	0.979072134374396	-4.7866294582372
O75354-1	ENTPD6	0.0679840577940569	3.40594437667636	0.835480450069102	0.443797228709256	0.915639186619765	-4.78732334471759
Q8NDF8-5	PAPD5	0.0633106957660483	3.32164791199795	0.975416351777828	0.376806997443755	0.915639186619765	-4.78762190564712
Q96BU1-1	S100PBP	0.0681890643722259	3.36707011465155	1.13896644284204	0.30937500938961	0.915639186619765	-4.78807662982934
Q8N9V3	WDSUB1	-0.0790005301901767	3.33187639532652	-1.19285366065998	0.289599524537824	0.915639186619765	-4.78837139123877
Q9H1K0	ZFYVE20; RBSN	-0.0636340506386035	3.27081816029312	-1.1146718182519	0.318676813426605	0.915639186619765	-4.78874679209425
P61803	DAD1	0.272369057010665	3.42121319497172	0.925229845651062	0.399826424738836	0.915639186619765	-4.78877730011247
Q9NQG5	RPRD1B	-0.0537157590026108	3.27125441891386	-1.33316795823005	0.243388237407172	0.915639186619765	-4.78883709841709
P02545	LMNA	-0.100239108999942	3.29613014050983	-1.12689053329813	0.313968182267383	0.915639186619765	-4.78915865220748
Q9Y5U2-1	TSSC4	0.0654017897323092	3.35169508329297	0.510366076412741	0.632827986936587	0.940139315483278	-4.78916760351234
Q16891-2	IMMT	0.383025119602408	3.2783966774455	1.34554913246075	0.23965882329542	0.915639186619765	-4.7896100158528
P37840-1	SNCA	0.114854832135231	2.06506096164956	1.02115282662538	0.356794673047009	0.915639186619765	-4.78974802497334
Q9NQS3-1	PVRL3; NECTIN3	0.0940348726298601	3.37446315674827	0.479549175579942	0.65300785425095	0.941255563430779	-4.78979893343031
P29372	MPG	-0.0611697783140657	3.28967488001618	-1.16008154448907	0.301486794868515	0.915639186619765	-4.78983918807708
Q9C037-1	TRIM4	-0.101824573919328	3.33706179587157	-1.31869535350093	0.24781684075465	0.915639186619765	-4.78998629903886
P23443-1	RPS6KB1	0.0632582408888818	3.34193534462546	1.18367032666456	0.292887315052902	0.915639186619765	-4.79010531719297
Q495W5-1	FUT11	-0.0462397146360278	3.23731336143642	-0.452009492333156	0.671336309468402	0.945032641382285	-4.79017954400067
P78310-1	CXADR	0.186236198294332	2.89218554862185	0.839457572551087	0.441772086353773	0.915639186619765	-4.79077976614516
Q8IV38	ANKMY2	-0.0815454096850611	3.18802591511083	-1.0782917280292	0.333064535260687	0.915639186619765	-4.79115978404487
Q6UW68	TMEM205	0.275066129615984	3.37590913013549	1.13360984755105	0.31140504835486	0.915639186619765	-4.79140735393362
P62487	POLR2G	-0.13717372836104	3.31609990908642	-1.25766890398779	0.267331273442662	0.915639186619765	-4.7914380361944
P47224	RABIF	0.0206887442884299	3.41318883114449	0.147034903074227	0.889196570221833	0.979111394692397	-4.79164217284099
Q9UNK0	STX8	0.0944373190412032	3.2922415316675	0.911300893410058	0.406413901847264	0.915639186619765	-4.79180271885552
Q14012	CAMK1	-0.0841760853146332	3.14124285286023	-0.998789387217536	0.366465747758688	0.915639186619765	-4.79190461778351
Q96G23	CERS2	0.308213662654384	3.39568605831691	1.01113611728949	0.361099492524785	0.915639186619765	-4.79192588163506
P47985	UQCRFS1	0.236028293251688	3.31065422246174	1.36695996953684	0.233336645361654	0.915639186619765	-4.79198459507033
Q8IXH7	NELFCD; TH1L	0.0699502634661104	3.31860758902191	1.52764466215952	0.190743719352317	0.915639186619765	-4.7923220863475
O95081	AGFG2	-0.0552642088614389	3.33498661101539	-0.388415768909929	0.714660804782514	0.953117503647409	-4.79233604060691
P42766	RPL35	0.253188679531997	3.41552162076289	1.24610549254274	0.271185531823172	0.915639186619765	-4.79247060417725
P41162	ETV3	0.10865020475404	3.35812780031649	0.838262038565747	0.442380101500246	0.915639186619765	-4.79293905547451
P51828	ADCY7	0.193388787981738	3.42914727470755	0.957427480608484	0.384929769457871	0.915639186619765	-4.79330000092407
O95835	LATS1	-0.0568099803504265	3.09839807591017	-0.581232581968952	0.587813345531138	0.930283331378826	-4.79338924116822
Q96PP9	GBP4	0.0965287172731555	3.45859513357759	0.899399412570854	0.412111233734013	0.915639186619765	-4.793451505943
O60499	STX10	0.071021818794813	3.31246454521316	0.844622092281084	0.439152946421346	0.915639186619765	-4.79353368831088
Q9BSY4	CHCHD5	-0.0835215084719201	3.28865177141763	-1.108572110806	0.3210505549406	0.915639186619765	-4.7935601279513
P49356	FNTB; CHURC1-FNTB	-0.0582544535763989	3.28777919643525	-0.970065061088202	0.379208419142286	0.915639186619765	-4.7936263632468
Q9BPX3	NCAPG	0.0914912591235219	3.24712031593993	1.70926982040964	0.151773709367581	0.915639186619765	-4.79368653604956
Q02127	DHODH	0.299312379138055	3.37203983077883	1.36957762909121	0.232574641249156	0.915639186619765	-4.79375281918393
Q8N335	GPD1L	-0.179894157343367	3.29275355879773	-1.26396421732781	0.265254221965778	0.915639186619765	-4.7937854008707
Q9BXJ8-1	TMEM120A	0.321850661142461	3.3190585257749	0.761527004295356	0.482749284689284	0.919407291326043	-4.7940020363019
Q5T124-1	UBXN11	-0.0245162134492518	3.3998586773796	-0.184004581711043	0.861676556033592	0.97593762589011	-4.79409184076261
Q96EW2-1	HSPBAP1	-0.0850488709472759	3.33642846386893	-0.708205419978912	0.512350390274038	0.919407291326043	-4.79423602723976
Q9P021	CRIPT	0.137325157003583	3.37596825645578	1.06812203607377	0.337186076243472	0.915639186619765	-4.79456019700509
Q8TDJ6-3	DMXL2	0.0612115940665494	3.1423498499238	0.679880810180872	0.528584588345101	0.920438179462333	-4.79462999752675
Q9BRR6-1	ADPGK	-0.0637356951402779	3.36118328232152	-1.51376218557227	0.194102872815601	0.915639186619765	-4.79595081142317
Q9NXR1-1	NDE1	0.050598685547274	3.35883503269146	1.228887103692	0.277019251496134	0.915639186619765	-4.79619057461548
Q14765	STAT4	0.0572748196501136	3.4265737262124	0.480254160907417	0.652542267590423	0.941255563430779	-4.79646310119302
O60888-2	CUTA	-0.0941905114773742	3.36004924809355	-1.42609219851317	0.216690702799145	0.915639186619765	-4.79647700677014
Q96BW5-1	PTER	-0.0939020726962411	3.25089386206423	-0.986275931769557	0.371972435818581	0.915639186619765	-4.79653183001539
Q13627-2	DYRK1A	0.0600708596580916	3.35777987933792	1.47528466933207	0.203719259837803	0.915639186619765	-4.79662146715651
Q9P2J9	PDP2	-0.0185304847263502	3.27019673530974	-0.13423852075118	0.898766552168606	0.980724814853327	-4.79707299728196
O14681	EI24	0.287852548890861	3.3108890099047	1.00178442169835	0.365157908384483	0.915639186619765	-4.79728146178907
O60733	PLA2G6	-0.0562707620999085	3.37961555035583	-0.530679359972886	0.61972300627244	0.938371733202196	-4.79755179872489
Q8IZ52	CHPF	-0.0707092684227181	3.2655431919698	-0.991442767605128	0.369690398725265	0.915639186619765	-4.79762107046477
Q9BTF0	THUMPD2	0.0544952734533526	3.3549419935324	0.555820834816387	0.603725946612675	0.935478717369524	-4.79763936433218
P56282	POLE2	0.0301150808570875	3.01987000971191	0.185542292507556	0.860536459190086	0.975937259894373	-4.79790256999551
Q6NS38-1	ALKBH2	-0.0870511681524624	3.23769686325447	-1.11102636624911	0.320093606606328	0.915639186619765	-4.79797525208851
P23610	F8A2; F8A1; F8A3	-0.0650659653770529	3.28553591229916	-1.123260585793	0.315360586538111	0.915639186619765	-4.79828762896758
P32119	PRDX2	-0.116226409159437	3.33151706774777	-1.54839275629081	0.185829750067251	0.915639186619765	-4.79851962098726
Q9Y613	FHOD1	-0.0379239630634703	3.35744512701629	-1.67008678117831	0.159441264790302	0.915639186619765	-4.79858663050819
O95405-1	ZFYVE9	-0.0362822523587588	3.11761130004368	-0.253045664576124	0.810916047100039	0.968608057644097	-4.7988431727595
Q8N2M8	CLASRP	0.0774854639670039	3.30621014120403	1.18868339040273	0.291088405637673	0.915639186619765	-4.79926034646568
Q32P28-3	LEPRE1; P3H1	0.054086420859555	3.17259092342416	1.19921564108224	0.287341399304943	0.915639186619765	-4.79938376074957
P28289	TMOD1	-0.184052613750552	3.24890887550181	-1.20869542582549	0.284006194541913	0.915639186619765	-4.79955648408397
Q86YC2	PALB2	-0.0376252335553782	3.20441919993162	-0.346388011812228	0.744002743033551	0.958276167057927	-4.79959589415886
Q8TET4	GANC	0.0177468010562492	3.33913368042186	0.126464144783728	0.904590569669778	0.981658398204992	-4.799621982447
Q15714-1	TSC22D1	0.0619926602309496	3.0607632182849	0.701536348237407	0.516141130062638	0.919864772915539	-4.79967341491035
Q9NXV2	KCTD5	-0.00219633551304209	3.14955739563969	-0.0168588386384817	0.987240693164624	0.998859746166788	-4.80001876524471
Q9ULQ0-1	STRIP2	-0.0451142064242091	3.2844178930349	-0.335762306348043	0.751503781877813	0.960006860436046	-4.80026803132026
O60268-1	KIAA0513	-0.0718724525709858	3.36961187233887	-0.74460950320414	0.492004173937699	0.919407291326043	-4.80035906737167
Q9Y4E5	ZNF451	0.0600284696840562	3.35945899580135	1.41361542849413	0.220105398980849	0.915639186619765	-4.80080280062753
P30291-1	WEE1	-0.0675527520090273	3.38818484126081	-1.27912673898551	0.260312607562394	0.915639186619765	-4.8013791888892
Q9NX05-1	FAM120C	0.0520019346478612	3.19275089201047	0.302730830129845	0.775020854350531	0.966219013315205	-4.8015764212395
Q969H6	POP5	0.061776865080756	3.28388871275074	0.86775971325768	0.42756621131419	0.915639186619765	-4.80161505078578
Q6PID8-1	KLHDC10	-0.00024219270371853	3.29124371496677	-0.00190178677965264	0.998560585480536	0.999696298876938	-4.8019079546755
Q8N4N3-1	KLHL36	0.0447365632867759	3.30012706164385	0.377272679497205	0.722388034207556	0.954153822630391	-4.80198698808554
Q86VI3	IQGAP3	0.0569562603417487	3.19459713634216	1.46690147502055	0.20587527345205	0.915639186619765	-4.80234812417326
Q2M3G4-1	SHROOM1	-0.0435641377956581	3.33092642387272	-0.397901678473801	0.708113605311942	0.953117503647409	-4.80271522079289
O43505	B3GNT1; B4GAT1	0.0229746881851917	2.74349418489864	0.144535962052328	0.89106379512146	0.979674653386727	-4.80271606072432
O15305	PMM2	-0.0667952669381033	3.36924438705902	-1.53070372203716	0.190011241391999	0.915639186619765	-4.80339428335527
Q6PIZ9	TRAT1	0.190316753149087	3.4379160508173	0.92548244211019	0.399707762699229	0.915639186619765	-4.80359292989376
Q9H8H2	DDX31	-0.208450490049917	3.28828754975198	-1.28577672487589	0.258172335773295	0.915639186619765	-4.80375872766714
Q6P1N9-1	TATDN1	-0.092239556005697	3.29872686375073	-1.42715173394432	0.216403084566564	0.915639186619765	-4.80390561080205
Q53LP3	SOWAHC	-0.0665333959412678	3.35356096696188	-1.08059928457615	0.332135427848706	0.915639186619765	-4.80405617151126
Q9NR12-1	PDLIM7	-0.133634363107901	2.56843011281347	-0.988899904979465	0.370812042451962	0.915639186619765	-4.80413143594547
Q9P2E3-1	ZNFX1	0.0600371487799115	3.32238660288016	0.849964409313596	0.436456266728763	0.915639186619765	-4.80413255471986
Q9UNP9-1	PPIE	-0.0753483451150562	3.31227487850089	-1.3542716983672	0.237063901079998	0.915639186619765	-4.80424948517545
Q96BW1-3	UPRT	-0.0744663177921476	3.29242213059008	-0.951843846486768	0.387480121137178	0.915639186619765	-4.80473308223006
Q9UGJ0	PRKAG2	-0.0409162580438871	3.3363089951527	-0.396889228024083	0.708811031465791	0.953117503647409	-4.80541774261906
O75884-1	RBBP9	-0.0756065012682694	3.31843457032651	-1.28316792154622	0.259010014413619	0.915639186619765	-4.80566344175266
Q9NNX1	TUFT1	-0.0611179098366767	3.28321752171379	-0.55223904794825	0.605989698883145	0.93556792739837	-4.80574204546919
O95197-3	RTN3	0.383538922175384	3.23163913546579	1.15276306848735	0.304200333063398	0.915639186619765	-4.80579598785902
Q96IZ5	RBM41	-0.112620580263727	3.35788184804534	-1.02485099017552	0.355216335634584	0.915639186619765	-4.80585569092537
Q9NYJ1-2	COA4	-0.114801482960608	3.28598776387691	-0.609119024640311	0.570654740689229	0.926551027367845	-4.80639143988641
Q7Z7A3	CTU1	-0.0618643614660296	3.30435894953289	-1.09997440414327	0.324422711819016	0.915639186619765	-4.80656143821341
Q58FF7	HSP90AB3P	-0.0203397795711039	3.26810507703871	-0.163349423919388	0.877027214521067	0.97803079063916	-4.80672372824409
O75051-1	PLXNA2	-0.00437127094440995	3.33695022431571	-0.0348346509413614	0.973640974533504	0.996840789868945	-4.80676493904168
Q9Y5W8	SNX13	0.0658535178692123	3.25490011427243	0.535282705399198	0.616775388596849	0.938371733202196	-4.80679957715513
Q8TB96	ITFG1	0.0940114065055664	3.39125103166793	0.839602272324047	0.441698539730718	0.915639186619765	-4.80701263959478
O60291-2	MGRN1	0.0581548564108289	3.3386887670103	0.653875825964126	0.54379655083005	0.922209846401359	-4.80715878437311
Q9GZS3	WDR61	-0.0730403436741675	3.31587434358383	-1.59404501536784	0.175454441544199	0.915639186619765	-4.80733273186127
Q9BT92	TCHP	-0.0258139084549823	3.30460545614239	-0.212295965306233	0.840765946208975	0.973125502906182	-4.80739178186039
P36551	CPOX	-0.151964920413666	3.26292896958824	-1.71238536436701	0.151180341255447	0.915639186619765	-4.80762998524648
O60496	DOK2	0.0540431344878052	3.41974100725965	1.06977676806667	0.336512465242885	0.915639186619765	-4.8077946820486
Q8TEQ8-1	PIGO	0.353213656331856	3.38732874044781	0.966289053605604	0.380910522398431	0.915639186619765	-4.80781802504438
Q99541	PLIN2	-0.156730250288028	2.99706633228087	-1.10349153807039	0.323039509302783	0.915639186619765	-4.80796834070691
Q6ZMG9-2	CERS6	0.083786814814918	3.3668326432376	0.54839314372133	0.608426060752938	0.936962194818155	-4.80818394403595
Q8WWQ0	PHIP	-0.151085202593617	3.29299366774027	-1.6186815900308	0.170097107091872	0.915639186619765	-4.80825546810003
Q8TD16-2	BICD2	-0.0521344456162456	3.3680538897251	-1.58764279283396	0.176873992987742	0.915639186619765	-4.80827249012718
Q9NX62	IMPAD1	0.0776101264012436	3.24290060144529	0.789715501825806	0.46761259129303	0.919361692717421	-4.80829549566958
Q9UKE5-4	TNIK	-0.0947946819970808	2.95448858337965	-0.687377592503484	0.524253694491885	0.920438179462333	-4.80830955443578
Q8IY17-4	PNPLA6	0.267517588017318	3.37687433043765	1.0110537751394	0.361135060864066	0.915639186619765	-4.80836288761127
Q9NSV4-3	DIAPH3	0.0646105459069187	2.93499575523504	1.24677197624833	0.270962002891405	0.915639186619765	-4.80860152744709
Q8NCG7	DAGLB	0.0577519134735111	3.31134396742046	1.25692810392429	0.267576673686294	0.915639186619765	-4.80865286627209
Q9Y653	GPR56; ADGRG1	-0.002333554507312	3.33918937934867	-0.0203644443655761	0.984587945337517	0.998859746166788	-4.80881983150089
O95786	DDX58	0.0347631811673976	3.27236363432449	0.28279851238202	0.789349639575719	0.967863797223961	-4.80898305759417
Q14141-1	SEPT6	-0.0566753471636303	3.33750548983685	-1.59235625592479	0.175827780421468	0.915639186619765	-4.80951118978851
Q69YH5-1	CDCA2	-0.11532517033964	3.3278133455551	-1.34104758688741	0.241008485289892	0.915639186619765	-4.80994240256294
Q86T03-2	TMEM55B; PIP4P1	0.0647058185494968	3.23235460139708	0.623986579542728	0.561638881739676	0.924306618507403	-4.80996684517882
P35610	SOAT1	0.321621768858763	3.31864455719214	1.01361491750587	0.360030135811786	0.915639186619765	-4.80997184543761
Q5D0E6-1	DALRD3	-0.0411944446908083	3.37146679034086	-0.297208338528259	0.778980803235536	0.966219013315205	-4.81019350204806
Q9H0I2-1	ENKD1	-0.0508817612358348	3.31515702144626	-0.426728359065182	0.688396985802307	0.948308276509856	-4.81040768289191
Q9Y483	MTF2	-0.301611605677058	2.92630404918288	-0.972981167152647	0.377898235554958	0.915639186619765	-4.81051894688159
Q8IY47	KBTBD2	0.0593418958947468	3.32756062879623	0.581939242041998	0.587374583653351	0.930283331378826	-4.81071595218881
Q9P2K5-1	MYEF2	-0.114699104110295	2.93653560257803	-1.50360947107061	0.196596240770499	0.915639186619765	-4.81108924796654
Q14BN4	SLMAP	0.186982304548811	3.34101696066965	1.24552825572727	0.27137926546096	0.915639186619765	-4.81112713855703
Q86V87	FAM160B2	-0.00299885817711209	3.37566892943969	-0.0224291896015522	0.983025624560988	0.998859746166788	-4.81136647973453
O95155-4	UBE4B	0.0535916959297817	3.32422415207273	1.65785974890284	0.16191327553014	0.915639186619765	-4.81196958293926
Q8N4V1	MMGT1	0.372077021226866	3.25790604041901	1.0776698253912	0.333315321085797	0.915639186619765	-4.81202312999412
Q76N32	CEP68	0.0565594546613027	3.25291496091239	0.665503414423616	0.536958723495145	0.920438179462333	-4.8125849682579
Q8NEY4-1	ATP6V1C2	0.0996684345342818	3.42010069520868	0.99559792538999	0.367863674854368	0.915639186619765	-4.81265131576159
Q7LBC6-1	KDM3B	0.0460607454934093	3.28422258336181	1.80028089800615	0.135381732527217	0.915639186619765	-4.81267523990736
Q8N5K1	CISD2	0.336941742657272	3.31308699458866	1.0290637782128	0.353425572672123	0.915639186619765	-4.81282170908841
O43572	AKAP10	-0.0670593757744144	3.27850222558809	-0.784441818360016	0.470417393346042	0.919361692717421	-4.81285459239049
Q9NQ92	COPRS	-0.0637319625865606	3.21724325118689	-0.55233058211343	0.605931784046411	0.93556792739837	-4.81309491465352
Q13309-1	SKP2	-0.0790189805547496	3.07168513832584	-0.591410412088031	0.581513720922393	0.928598108013809	-4.81325453545687
Q9Y5X3	SNX5	-0.045108558046468	3.36787100051742	-1.77173220704836	0.140318547538704	0.915639186619765	-4.81340767207239
Q16611	BAK1	0.13835789548458	3.35034068431308	1.09450195881319	0.326585175970203	0.915639186619765	-4.81359096081298
Q02153	GUCY1B3	-0.0277084687390067	3.23221679239254	-0.260837837016571	0.805248186516116	0.968596116640421	-4.81394465919979
P51003	PAPOLA	0.0587251821101059	3.25077431350403	1.45062447688991	0.210124916828502	0.915639186619765	-4.81426916101539
Q86VW0	SESTD1	0.0719979018149322	3.24443829309719	0.441433962199438	0.67844619833282	0.945520249671123	-4.81432209622334
O43739	CYTH3	0.0593318692665458	3.31448905155324	0.679908202031897	0.528568719524619	0.920438179462333	-4.81452437074506
Q9NQX4	MYO5C	0.0539726923267039	3.34266149682982	1.0113605944822	0.361002542817329	0.915639186619765	-4.81460711099258
O14653-2	GOSR2	0.137363881608375	3.29200337268678	1.08524320652171	0.330272424866532	0.915639186619765	-4.81464977250338
Q9NXN4-1	GDAP2	-0.148954440945359	3.20866746802913	-1.03940995338138	0.349060153495156	0.915639186619765	-4.81490890256364
Q96C92-4	SDCCAG3	-0.0669740026434845	3.31149626493215	-0.957318292876803	0.384979509133718	0.915639186619765	-4.815284313052
O43182	ARHGAP6	0.0917211266204641	3.43124501511801	1.36577594543289	0.233682094438209	0.915639186619765	-4.81544633974366
Q9H2V7	SPNS1	0.0987943024783004	3.27970935269674	0.546629590344367	0.609545225492834	0.937826277354733	-4.81610630635097
Q8IY81	FTSJ3	-0.288935505548123	3.18720483852225	-1.735740957963	0.146806750211653	0.915639186619765	-4.81650406381878
Q9NTG7	SIRT3	-0.0871785437620067	3.27357615459072	-0.539001892815611	0.614399968250636	0.938371733202196	-4.81665474754742
P53778	MAPK12	0.0578304474860722	3.30527666909149	0.790350227427621	0.467275854419435	0.919361692717421	-4.81715646191452
Q9NU19	TBC1D22B	0.0422590066702948	3.31662150572845	0.388845399725961	0.714363654423062	0.953117503647409	-4.81733673188813
Q16540	MRPL23	-0.140173526781482	3.24208521910494	-0.725927495048611	0.502372267768407	0.919407291326043	-4.81754708580051
Q9NPH2	ISYNA1	-0.203688691774679	1.66652772237943	-0.731532909869425	0.499245129596504	0.919407291326043	-4.81774897374217
Q04864	REL	0.0611541096188323	3.10844436146355	0.665044595991599	0.537227436251358	0.920438179462333	-4.81810980192068
Q8WUY1	THEM6	0.164548869973476	3.33658174370603	0.995232434603723	0.368024051735542	0.915639186619765	-4.81817425418617
Q9UPV9	TRAK1	0.0556794437924706	3.30185355771898	0.600150743993122	0.576137872506835	0.927582382174441	-4.81846297945651
Q9H0F6-1	SHARPIN	-0.0744027104900819	3.35878788954623	-0.85041545044996	0.436229179307156	0.915639186619765	-4.8186228284148
Q6PCD5	RFWD3	0.0391054828406275	3.20440490782572	0.347581253164748	0.74316241370033	0.958276167057927	-4.8187003009295
O75896	TUSC2	-0.0633669253795981	3.36040435284338	-0.516847466449637	0.628629326340055	0.939983091109605	-4.81912171687539
Q8N8Z6	DCBLD1	0.149111293837954	3.41087462846745	0.865137402762905	0.428867300908026	0.915639186619765	-4.81925894769128
Q7KYR7	BTN2A1	0.104413101644028	3.34235189153593	0.713537288160437	0.509333798290611	0.919407291326043	-4.81995651372472
Q9HBH1	PDF	0.0872447198527739	3.31726119286167	0.805141476536524	0.45947996721119	0.919361692717421	-4.82101638128922
Q86UU0	BCL9L	0.0688671780753237	3.37022018032882	0.62341840270711	0.561981724165391	0.924306618507403	-4.82114857701612
Q9NWW6-1	NMRK1	-0.0818205032270092	3.41324108251787	-1.25028348792792	0.269787085605519	0.915639186619765	-4.82122045722332
Q8WVD3-1	RNF138	-0.0322560734459996	2.83280922726124	-0.241867271714849	0.819070252809207	0.970546184626391	-4.8213721592129
Q969T7	NT5C3B; NT5C3L	-0.04943138888224	3.20379690385694	-0.421582880654432	0.691896128581037	0.94931463805847	-4.82162616203706
P50548	ERF	0.0476887517892454	3.26262811060312	0.533910328614734	0.617653284439395	0.938371733202196	-4.8216443075633
Q9HAW0	BRF2	0.0468247685368243	3.34643196609619	0.248396916514817	0.814303846101254	0.969813149304934	-4.82294992908441
Q5ZPR3	CD276	0.079572220590127	3.11291309911289	0.574924796753496	0.591738839658142	0.931483552071724	-4.82304041673601
Q15048	LRRC14	-0.0768115803274819	3.35168429374841	-0.981750508425318	0.373980803206367	0.915639186619765	-4.82307773742698
Q5T7V8	GORAB	-0.0643707915992151	3.28295313823944	-0.758900964232946	0.484177517278974	0.919407291326043	-4.82314062336164
Q14147	DHX34	0.0482124989073114	3.31906521082967	1.40091420214255	0.223634572399046	0.915639186619765	-4.8233077603182
Q96AP0	ACD	-0.0553179021855236	3.3420001290335	-0.704145970991572	0.514655477788748	0.919864772915539	-4.82383230225164
Q8WUZ0-1	BCL7C	-0.131098463637859	3.32930600291285	-1.11331825035882	0.319202229338272	0.915639186619765	-4.82432275246663
P06753	TPM3	0.0344954092990475	3.35349534555058	0.347891406308683	0.742944058584153	0.958276167057927	-4.82435135671087
Q7KZ85	SUPT6H	0.0373724146472809	3.29506125065546	1.79728713919589	0.135890933053077	0.915639186619765	-4.82439656407006
P63096-1	GNAI1	0.167198088761367	3.31072379126429	0.947332305361972	0.38955088187555	0.915639186619765	-4.82482362845717
P13591-2	NCAM1	0.115411258019868	3.07229936066847	0.809049418345782	0.457436658697163	0.918425692880027	-4.82490302230345
P13861	PRKAR2A	-0.144204894624006	3.30507356731465	-1.49016920691649	0.199945287181153	0.915639186619765	-4.82524500941463
Q8ND30	PPFIBP2	-0.111413750880376	3.34604089227896	-1.20008334419728	0.287034653225357	0.915639186619765	-4.82541028242231
Q99714-1	HSD17B10	0.0832678872585722	3.31948069915943	1.69381254962585	0.154752797703979	0.915639186619765	-4.8257386481881
Q96NE9-1	FRMD6	0.0549601604647027	3.33323424756233	0.763284687648739	0.481795048510031	0.919361692717421	-4.82596033074492
Q9UH03-1	SEPT3	-0.231029430540165	2.02317400999024	-1.0792404072546	0.33268228973	0.915639186619765	-4.82598467531367
P58004	SESN2	-0.0824453996572373	2.97373751117666	-0.772078831077824	0.477041497101186	0.919361692717421	-4.82628143414145
Q9H6X4-1	TMEM134	0.0684486748662633	3.41822684851277	0.680854325016732	0.528020805874672	0.920438179462333	-4.82629413435434
P78410-1	BTN3A2	0.157612194500384	3.4320538458547	0.961625264489698	0.383021499089366	0.915639186619765	-4.82637820786421
Q9UIS9-9	MBD1	-0.225907866617046	3.2714902794652	-1.17729463321614	0.295189648460394	0.915639186619765	-4.82640083869692
Q6UX07	DHRS13	0.245505172982092	3.41287272427538	1.06236020728761	0.339540691047348	0.915639186619765	-4.82653881186942
Q96BS2-1	TESC	-0.0700328579718881	3.37635047251832	-1.04936250490973	0.344904273917534	0.915639186619765	-4.82664417085964
Q96EQ0	SGTB	-0.12912820039723	2.65350112524888	-1.01060802042233	0.361327659328257	0.915639186619765	-4.82669241855581
Q15796-1	SMAD2	-0.0390158319532694	3.36296701339581	-0.244270379588179	0.81731500904678	0.969813149304934	-4.82673383328134
O43491-1	EPB41L2	-0.0997562978389722	2.99572258096858	-0.573017744262088	0.59292883240741	0.931483552071724	-4.82697503277181
Q14164	IKBKE	0.0734647335914683	3.44785773713313	1.15637175380226	0.3028595979572	0.915639186619765	-4.82701223170007
P14151-2	SELL	0.0980624445492736	3.42041440233207	0.921250673560342	0.401699472875003	0.915639186619765	-4.82702503211131
P13929-1	ENO3	-0.194542398739954	2.94034025321594	-1.22129057305977	0.279629303021844	0.915639186619765	-4.8270871005964
Q6UXT9	ABHD15	0.0659268347582461	3.37775800925812	0.344217456010401	0.7455323896048	0.958276167057927	-4.82745973274231
Q96EY4	TMA16	-0.0787862307965974	3.34461618028083	-1.15508985215722	0.30333525859278	0.915639186619765	-4.82754775561941
Q5JU69-1	TOR2A	-0.0953638016213618	3.34460802873206	-0.951197914978025	0.387776044844439	0.915639186619765	-4.82759927174312
Q8IYU8	EFHA1; MICU2	-0.0788911003541085	3.21817446515508	-0.710372681640472	0.511122716318345	0.919407291326043	-4.82780905962762
O75182-1	SIN3B	-0.0663371419591881	3.24561413474925	-1.15409140351795	0.303706202767181	0.915639186619765	-4.82823215447508
O14713-1	ITGB1BP1	-0.0644360696584441	3.42230180423339	-0.673767466747855	0.532134364221625	0.920438179462333	-4.82843118535329
P20309	CHRM3	0.166919369929332	3.45193903408843	0.848760447964991	0.437062878038993	0.915639186619765	-4.8286295398331
Q49AR2-1	C5orf22	0.063498644983013	3.37424365190182	1.27429371489152	0.261878409360627	0.915639186619765	-4.82864132784603
P21397	MAOA	-0.254470226072526	1.16745388288133	-0.782737105456397	0.47132671015902	0.919361692717421	-4.82868286997525
Q96GD0	PDXP	-0.0751826503427457	3.2734955116722	-1.16343128154411	0.300252005468144	0.915639186619765	-4.82868291693619
Q969K3-2	RNF34	0.0516416989097349	3.24105069220187	0.561339801828454	0.60024789535164	0.934128354033019	-4.82873389599525
Q9NP73-2	ALG13	-0.0851351996012483	3.40977698488618	-0.919047711787819	0.402739474408762	0.915639186619765	-4.82889814163242
Q86UB9	TMEM135	0.0890139199466698	3.32208187849247	0.654186963791851	0.543612822952946	0.922209846401359	-4.82894545174269
P20936-1	RASA1	-0.106133129813826	3.34750915597366	-1.72411038403051	0.148968346299419	0.915639186619765	-4.82904197369775
Q8IWT6	LRRC8A	0.181109846788977	3.26653660363868	0.893636466777677	0.414892794261844	0.915639186619765	-4.82910128029048
Q8TEV9	SMCR8	-0.0397338717781558	3.19670898061365	-0.357789702713313	0.735990160356671	0.9575831815013	-4.82917423699273
Q8NHH9	ATL2	0.310654342208814	3.25140366818279	1.12524221041842	0.314599785708368	0.915639186619765	-4.82940905702299
P20339	RAB5A	0.0740039297981132	3.33988896951004	1.34925833545914	0.23855208883324	0.915639186619765	-4.82947176086525
Q92674	CENPI	-0.19193837442235	3.220110693623	-0.993681732873552	0.368705147750186	0.915639186619765	-4.82957877566285
Q8TAP8	PPP1R35	-0.0510243384972836	3.28960756195126	-0.553478715347479	0.60520562875755	0.93556792739837	-4.82977876113789
Q9H9Q2	COPS7B	-0.0786953032440114	3.32084395141917	-1.20808584804534	0.284219597411254	0.915639186619765	-4.82986694258913
Q96S66	CLCC1	0.332248259622497	3.23852846626262	1.14057548852977	0.308767508458754	0.915639186619765	-4.8301658695788
P24928	POLR2A	0.0510103928101067	3.29986946975909	1.99268568658479	0.106482630639226	0.915639186619765	-4.83052195028502
P48730-2	CSNK1D	0.00936669210006027	3.27472356518467	0.0806965926041359	0.93900298883126	0.989803683695112	-4.83057661610401
Q96GQ5-1	C16orf58	0.265847408870363	3.38527350565968	0.962512118179137	0.382619341373481	0.915639186619765	-4.8307720506209
Q01850	CDR2; LOC101060399	-0.0735661648258138	3.1805931752756	-0.858401216204149	0.43222370976226	0.915639186619765	-4.83079219803506
Q96HA8	WDYHV1	-0.0742635819406264	3.30901011822146	-0.613504675031142	0.567985596445382	0.92612322987493	-4.83183548155893
O15050	TRANK1	-0.0161662600831632	3.35343316033649	-0.133117827179108	0.899605654326929	0.980724814853327	-4.83189833207389
Q86XK3-2	SFR1	0.0820870681418864	3.36582522407193	0.841316078464565	0.440828179304337	0.915639186619765	-4.83205561855615
Q9ULD4	BRPF3	0.062641610408031	3.29963705703652	0.8825211568228	0.42029980497387	0.915639186619765	-4.83212214867619
Q49A26-2	GLYR1	-0.165004084946461	3.29325821360386	-1.12442076391148	0.314914965303121	0.915639186619765	-4.83220975993062
P40337	VHL	-0.0437831654643821	3.29701794355687	-0.413562910951835	0.697367725077403	0.950935785746387	-4.83245619156419
Q5SVZ6	ZMYM1	-0.0741662923649328	2.91301634023672	-0.641796403043508	0.550961540368475	0.923936978196585	-4.83290925216924
Q9BXF6	RAB11FIP5	-0.128759279804646	3.35113202275551	-1.33562266101637	0.242644521245316	0.915639186619765	-4.83300716586874
Q03154-1	ACY1	-0.0793484998468522	3.36118853586502	-1.40523072019147	0.222429139122637	0.915639186619765	-4.83314441752284
O15360	FANCA	0.0577629096186991	3.25326110905534	0.716191554211956	0.507836773998706	0.919407291326043	-4.833180439082
Q9Y6M7-7	SLC4A7	0.102451699905698	3.10126630121768	0.469230783428397	0.659843067186581	0.941255563430779	-4.83341491279573
Q13686	ALKBH1	0.0638263822347694	3.19030821267214	0.589031671982175	0.582982248634895	0.929142293850107	-4.83370573785654
Q8NC96	NECAP1	-0.0799245932039108	3.30689333077979	-1.13616672070474	0.31043457972945	0.915639186619765	-4.83432222879184
Q02833-1	RASSF7	-0.0442708073853876	3.26669751701686	-0.45101119154049	0.672005789582497	0.945200672076131	-4.83439302861079
Q9H2H8-1	PPIL3	0.0532630930953762	3.26932282307462	1.30285185552951	0.252751489042069	0.915639186619765	-4.83467547440636
Q6IE81-1	PHF17; JADE1	0.0529646944307039	3.32709058639577	1.18807462735923	0.291306324395422	0.915639186619765	-4.83509503306148
Q9Y6H1	CHCHD2	-0.0768893689414479	3.24493349045991	-0.484079540251829	0.650019089794884	0.941255563430779	-4.83517060137042
Q7Z7K6-1	CENPV	0.120982823066914	1.52362105080898	0.41926027964853	0.693478508985599	0.949736349032924	-4.83524972429098
Q6YHK3-1	CD109	-0.0480136813917192	3.31293154176541	-0.521033467677928	0.625926177823429	0.939193919795928	-4.83544170948579
Q9H0U9	TSPYL1	-0.0323316764555283	3.01370977662842	-0.291787242311474	0.782875578036493	0.966667628488912	-4.83562209506584
Q92902-1	HPS1	-0.0653562118785588	3.3493229926886	-0.514683458309758	0.630029390874562	0.940139315483278	-4.83562509948479
Q9UNL4-1	ING4	0.0393541632397397	3.28570210264316	0.348431534502267	0.742563862113137	0.958276167057927	-4.83579741406658
Q7Z449-1	CYP2U1	0.237944514451321	3.39048922967879	0.756056717818663	0.485727898933101	0.919407291326043	-4.83613084122859
Q9H115	NAPB	-0.10619299182792	3.34764538120948	-1.19179972742884	0.289975152269815	0.915639186619765	-4.83619313701032
P84095	RHOG	0.243585100578931	3.39315937312016	1.23646991936292	0.274436121570392	0.915639186619765	-4.83633366886571
O94964-2	SOGA1	-0.0649568942566992	3.2348010926016	-0.862973084430626	0.429943481178825	0.915639186619765	-4.83675092981585
Q8IUC6	TICAM1	0.0179960303407129	3.40716796041474	0.169807723614351	0.872220406921616	0.977557969769835	-4.83678809143628
Q6PJ61	FBXO46	0.0544047845900245	3.31038975878288	0.582989571442182	0.586722816194588	0.93025587207525	-4.83691870564193
Q53FT3	C11orf73; HIKESHI	-0.153475716728717	3.31405543315152	-0.876867520349198	0.423071275114568	0.915639186619765	-4.83693011160156
P07384	CAPN1	-0.0433594745111353	3.36119297319159	-1.79216170670421	0.136767289793509	0.915639186619765	-4.83743448875581
Q6ZUJ8	PIK3AP1	-0.0259114383729278	3.36880130150141	-0.256162598378384	0.808647228807851	0.968596116640421	-4.83763092636096
P33897	ABCD1	0.119355302528053	3.32538826111544	0.876815754703648	0.423096717477269	0.915639186619765	-4.8377606522205
Q96F44-1	TRIM11	0.0656770173498485	3.26847015794299	0.885117458372745	0.419031879661558	0.915639186619765	-4.83782542783425
Q8NFU7	TET1	-0.0439982423497595	3.21202452329823	-0.401022798652212	0.705965699126349	0.952908801495272	-4.83793289275509
Q04727-1	TLE4	-0.0414982182197041	2.28459997843946	-0.213156687899531	0.840132034030255	0.973125502906182	-4.83808012028876
Q8NEN9	PDZD8	0.183279955737518	3.26210410403864	0.926147040665185	0.3993956906673	0.915639186619765	-4.83855758853814
Q8WXX7-1	AUTS2	0.0663765648242718	3.35056538306884	0.652496971989324	0.544611268506452	0.922354043635415	-4.83857285902448
P40121	CAPG	-0.065006125599874	3.36766870297682	-0.914179231933163	0.405045533713218	0.915639186619765	-4.83857349282371
Q12846	STX4	0.195902173472241	3.34074922233297	0.948779563856426	0.388885618506573	0.915639186619765	-4.83870047087984
O95677-2	EYA4	0.0364354202688478	3.27194542206555	0.390615079638388	0.713140286284702	0.953117503647409	-4.83893567255194
Q9UMX0-3	UBQLN1	-0.0693937297029337	3.31661280216277	-1.18211466001524	0.293447588941265	0.915639186619765	-4.83900996490248
Q8NAP3	ZBTB38	-0.493124774108944	3.21872938369241	-1.35500746676185	0.236846232988437	0.915639186619765	-4.83933153273834
Q9Y666	SLC12A7	0.180622383943996	3.37142912915118	1.15739374897693	0.302480854501461	0.915639186619765	-4.83952250749874
Q9P0I2	EMC3	0.270911679549382	3.20942570657517	0.964855866083307	0.381558205164038	0.915639186619765	-4.83968273996702
Q8N8D1	PDCD7	-0.046758563358146	3.2801836060926	-0.351908315177151	0.740118583513319	0.958180859292409	-4.8396934539388
Q12980	NPRL3	-0.0523894683522581	3.36276396626257	-0.91813071690765	0.40317301937757	0.915639186619765	-4.83973951931789
O00142-6	TK2	0.0268728173362127	3.3376427900105	0.218083818595482	0.836505963436091	0.972191556220765	-4.83987208925645
Q13530	SERINC3	0.0193435859000199	3.36212558053579	0.158760036607187	0.880446753167149	0.97803079063916	-4.83987725062755
Q9BTX7	TTPAL	-0.0522776428408626	3.37184238206309	-1.16388713889542	0.300084315916848	0.915639186619765	-4.83991308738648
Q8NFZ5-1	TNIP2	-0.00974096263398684	3.35166536059089	-0.0669075614904505	0.949405079697369	0.992199185579628	-4.83998378343454
Q9P000-1	COMMD9	-0.101129773480304	3.34442321894111	-1.28426953491647	0.258655982392954	0.915639186619765	-4.84040907810225
Q9UGL1-2	KDM5B	0.0140139860785605	3.25315363073206	0.116996836770712	0.911692122066077	0.983261662600826	-4.84059076377327
Q9Y6X0-1	SETBP1	-0.122555757239952	3.31165701276413	-0.926273468047599	0.399336347125203	0.915639186619765	-4.84084751241892
Q53GT1	KLHL22	0.0178830685354537	3.2402907816018	0.169546783665661	0.872414498757697	0.977557969769835	-4.84166031870495
Q8WUD1	RAB2B	0.0522313068421852	3.02617380733756	0.500341943679918	0.639353085977028	0.940139315483278	-4.84173572373459
Q5H8A4-1	PIGG	0.111472735441944	3.26464880386272	0.880757856755953	0.421162652510402	0.915639186619765	-4.8418529998971
O96008	TOMM40	0.511374467150344	3.21799286173479	1.30395348636369	0.25240542310572	0.915639186619765	-4.84188468004357
Q01081	U2AF1; LOC102724594; U2AF1L5	0.0435844429344318	3.31522886081037	1.63218038652739	0.167231483486839	0.915639186619765	-4.84233239057752
O14523-2	C2CD2L	0.205714720265358	3.42308726621415	1.0555318478871	0.342349459441059	0.915639186619765	-4.84291756039376
Q9BQ24-2	ZFYVE21	0.0015368702432561	3.26799105710502	0.0140181248600344	0.989390447908104	0.999327743782171	-4.84298086298079
Q9ULR3	PPM1H	0.0599371380750522	3.30790604537836	0.912513867857263	0.405836799782712	0.915639186619765	-4.84307694637874
P23025	XPA	0.0623842036175039	3.34357206132859	0.891375263190621	0.41598825997021	0.915639186619765	-4.84312425224143
Q86YQ8	CPNE8	-0.071788813500965	3.19625241255495	-0.716444136917246	0.507694477538881	0.919407291326043	-4.84316011956213
Q9GZU1	MCOLN1	0.0523655113483259	3.36361129535581	0.39302854695716	0.711473473081751	0.953117503647409	-4.84325878767871
Q6VY07	PACS1	-0.0869818465690047	3.3552006714804	-1.50828832008485	0.195443301655602	0.915639186619765	-4.84337206857514
P33121	ACSL1	-0.0938312483113976	3.19878113040996	-1.13862661093311	0.309503449568054	0.915639186619765	-4.84351862965293
Q8IVB4	SLC9A9	0.251825073866085	3.46731564564956	1.1691248298952	0.298163606118963	0.915639186619765	-4.84357112650533
Q96AY2-2	EME1	0.0166266356164295	3.18945231532759	0.133997660922364	0.898946879457654	0.980724814853327	-4.84366496264304
Q92698	RAD54L	0.0531099199702464	3.21409082791499	0.814373156704593	0.454664133003019	0.917468712627077	-4.84390740144171
Q9UKM7	MAN1B1	0.0672616692606679	3.37000875039937	1.06685339377477	0.337703304716061	0.915639186619765	-4.84402095281509
Q9BQD3	KXD1	-0.0664514726484228	3.33559675033375	-0.899947102064309	0.411847658608446	0.915639186619765	-4.84421802703206
Q7Z2W9	MRPL21	0.0850881984053181	3.30054152561434	0.933199149745998	0.396096395590936	0.915639186619765	-4.84507160467729
Q6UB28	METAP1D	0.0613137058810332	3.25749609942059	0.461375610787119	0.665072371255634	0.942372782373603	-4.84518026759069
Q15051-1	IQCB1	0.0685052184369962	3.2142972019204	1.02598878641867	0.354731927122209	0.915639186619765	-4.84538737767404
Q9UNA1-1	ARHGAP26	-0.0606948719888052	3.3310772146695	-0.60110413681756	0.57555338836131	0.927582382174441	-4.8457412792564
O00483	NDUFA4	0.452015312461257	3.1727629949958	1.08030513059661	0.332253740031809	0.915639186619765	-4.84578984157911
O94923	GLCE	-0.0717862772306237	3.18799050558716	-0.713953851583434	0.509098648144849	0.919407291326043	-4.84580291318717
Q15233	NONO	0.0294407734614265	3.2654996877715	2.04783892243705	0.0994527482105906	0.915639186619765	-4.84590870770885
Q8WTT2	NOC3L	-0.428585046940599	3.16553839493278	-1.56766907574313	0.181376582936314	0.915639186619765	-4.84591425958615
Q5VV17	OTUD1	0.0148764715960933	3.29370815849935	0.129985603333282	0.901951657096563	0.981208450280188	-4.84591944964677
P31930	UQCRC1	0.37381961420724	3.29629764582261	1.55110383549737	0.185196963435373	0.915639186619765	-4.84602877560977
O75487	GPC4	0.148354188770145	3.43390836448717	1.35007807425791	0.238308151481285	0.915639186619765	-4.84630183674782
Q16875-4	PFKFB3	-0.0789412624180897	3.21041819303184	-0.669641404406761	0.53453936788402	0.920438179462333	-4.84638830746013
P62873	GNB1	-0.0557837948700218	3.32413332076206	-1.59052116132437	0.176234367809684	0.915639186619765	-4.84674687861659
Q969T9	WBP2	0.0490286860049652	3.29135006873989	1.32056996669768	0.247238975763346	0.915639186619765	-4.84689085077451
Q9H3P7	ACBD3	-0.0741018996164318	3.32707437643898	-1.7730221558131	0.140091538082693	0.915639186619765	-4.84701033395422
Q9UKT5	FBXO4	-0.0658102237492558	3.38187233595279	-0.723888303114674	0.503513339210155	0.919407291326043	-4.84702447010596
O60861-3	GAS7	0.00171366578697597	3.35737692363421	0.0160553695445462	0.987848719265281	0.998859746166788	-4.84742864839682
Q96S53-1	TESK2	-0.0553116012930951	3.34961987583434	-0.707062228453392	0.512998798797915	0.919407291326043	-4.84753075318944
P51665	PSMD7	-0.124387144798583	3.31708112977809	-1.57520052716851	0.179665574781782	0.915639186619765	-4.84757606898302
Q86SZ2	TRAPPC6B	-0.143058320562538	3.29982785687207	-1.19395171019936	0.289208640855952	0.915639186619765	-4.84788553614844
Q9UHL9-3	GTF2IRD1	-0.0360367260845767	3.18127717182143	-0.383745926433542	0.717894408206527	0.953971370520578	-4.84794595060109
Q15075	EEA1	-0.0857102397401672	3.34921772970421	-1.93915747904574	0.113808760077417	0.915639186619765	-4.84898673186289
Q9NVH1-1	DNAJC11	0.296006858007692	3.29286885715258	0.993048681810656	0.368983497677016	0.915639186619765	-4.84929027418644
Q9UPY8	MAPRE3	-0.121543498401735	3.30294546706816	-1.11827143577988	0.317283241789902	0.915639186619765	-4.84930616784653
Q13435	SF3B2	-0.0272000478883221	3.30723493011858	-2.01020370005573	0.104194426704303	0.915639186619765	-4.84951611939186
Q6P1K2	PMF1; PMF1-BGLAP	-0.144659451858438	3.28345442226207	-1.20159176560824	0.286502108987724	0.915639186619765	-4.84962831241434
O00587	MFNG	0.0119857374386516	3.26496567342276	0.0711174093795827	0.946227935288077	0.991843919833887	-4.84989529521642
P51151	RAB9A	0.0929634169133222	3.23623326955418	0.900991488498387	0.4113454208575	0.915639186619765	-4.85006441416018
Q9Y2K2-4	SIK3	-0.0338663363663068	3.36135926550242	-0.302697324515888	0.775044856236959	0.966219013315205	-4.85026562988368
Q03468	ERCC6	-0.240040272549079	3.3042799868628	-1.20378059516504	0.285730939458408	0.915639186619765	-4.85036701905625
Q8IWF2	FOXRED2	-0.0140432847261811	3.19800978466757	-0.129456826047156	0.90234782035788	0.981208450280188	-4.85048280983176
Q14247-1	CTTN	-0.355538300150223	2.29535328426312	-1.35199918842968	0.237737391198855	0.915639186619765	-4.85061117018293
Q01432-4	AMPD3	-0.0410538118780723	3.39534993036384	-1.37808904270082	0.230113273528359	0.915639186619765	-4.85066112678959
P62829	RPL23	0.0990546202430111	3.36545234087945	1.71424522022688	0.150827249494714	0.915639186619765	-4.85068296013687
Q8IWW6-1	ARHGAP12	-0.0385426729096621	3.21585533395963	-0.347363287859769	0.74331588306014	0.958276167057927	-4.85151010612388
Q09327	MGAT3	0.0805876942693552	3.41254202842243	0.644579103051225	0.549305433479569	0.923936978196585	-4.85157752894966
Q9NQ34	TMEM9B	0.054393365908111	3.37760191849599	0.734350247648948	0.497678657119168	0.919407291326043	-4.85176481446178
Q8N9F7	GDPD1	0.0937172515095891	2.86036140719371	1.00886685260456	0.362080799057321	0.915639186619765	-4.85189353008377
Q9NYM9	BET1L	0.0812978717811306	3.33683032408152	0.872772509746497	0.425087655940022	0.915639186619765	-4.8520537985028
Q9H8M7-1	FAM188A; MINDY3	-0.0335229369138655	3.26367376401807	-0.351733541005526	0.740241421058117	0.958180859292409	-4.85240027759024
[truncated: 4,723 more rows]
