# Supplementary material for: Thalidomide promotes degradation of SALL4, a transcription factor implicated in Duane Radial Ray syndrome
Source: eLife journal article supplement (doi:10.7554/elife.38430), 2018-08-01
Supplement: supp [file elife-38430-supp-v1.zip › elife_poa_e38430_Figure_1_source_data_9.csv]

	ID	logFC	AveExpr	t	P.Value	adj.P.Val	B
Q96JP5-1	ZFP91	-1.96423071963523	3.04838498152201	-64.2184578881186	4.03151096643087e-09	1.35499083581741e-05	8.34713154479779
Q9UKT9-1	IKZF3	-2.63473395157488	3.02468837367708	-91.4422393204707	5.78219552074551e-10	3.88679182904513e-06	8.34025367718252
Q13422	IKZF1	-2.09356164059482	3.14471200700798	-51.2690901833689	1.38848363007869e-08	3.11112898712966e-05	6.68999595430352
P51157-1	RAB28	-1.81921444413562	3.24608438466165	-39.4144873351065	5.8758026799867e-08	9.87428640371765e-05	5.60933066023724
Q9Y6N5	SQRDL; SQOR	0.287402317844699	3.39868190392884	13.2050031498542	2.25059422969692e-05	0.0252141573533712	3.55945849074155
P11177	PDHB	0.248447750908449	3.32380100816649	11.6181868813344	4.45511028334288e-05	0.0427817876066155	2.70747478137175
Q03989	ARID5A	-0.260317711375541	3.39606609829684	-10.6369919815402	7.10870670684639e-05	0.0530941405371349	2.4312449843843
P11310-2	ACADM	0.242003471443985	3.30515803251841	10.7884143151524	6.59737579011495e-05	0.0530941405371349	2.39501862227419
P82930	MRPS34	0.271522885039217	3.29340531237217	9.38417752054935	0.000137240848590904	0.0546711512370985	1.83025839063616
P14921-1	ETS1	-0.595853043401993	3.34673946929688	-9.72084683219513	0.000114144819484252	0.0546711512370985	1.78392061161094
Q6P161	MRPL54	0.317350383386919	3.35630300285512	9.25840077619932	0.000147246563156516	0.0546711512370985	1.75476540344876
Q9Y5Y6	ST14	-0.236789932778762	3.42905972685139	-9.41686883485464	0.000134772151520153	0.0546711512370985	1.62679298963842
Q8N5C7-1	DTWD1	-1.47063853184971	3.03433674162519	-15.6892073666762	8.91003944194353e-06	0.0119786570257489	1.58371793028162
P22033	MUT	0.327885620959735	3.36186897922846	8.91160775395116	0.000179587300847373	0.0546711512370985	1.4553634681204
Q9BQ95	ECSIT	0.297257376299952	3.29256523045063	8.65630053328722	0.000208778444482152	0.0546711512370985	1.41185739234534
O43924	PDE6D	-0.365995228882354	3.35037905980821	-8.71554792557698	0.000201537461415271	0.0546711512370985	1.37528216187142
P48735	IDH2	0.262729358817217	3.40303546099188	9.80006190190159	0.000109393352403224	0.0546711512370985	1.33683485502491
O60285	NUAK1	-0.421133539634728	3.41317768918485	-8.64089687943096	0.000210710615609252	0.0546711512370985	1.23290838229998
P50440-1	GATM	0.279434507560633	3.47803277348878	8.51198193738757	0.000227728687092942	0.0546711512370985	1.22333694868244
Q15306	IRF4	-0.153943743401355	3.41445011899553	-9.06650775439773	0.000164208716303171	0.0546711512370985	1.17737930890908
Q15070-1	OXA1L	0.474016696020948	3.10314245468068	8.20957626914528	0.000274370017357817	0.0601302861595805	1.15226515083707
Q9UDR5	AASS	0.183928688197903	3.30359520058446	8.51953131074908	0.000226688798533716	0.0546711512370985	1.13146417382746
Q9H3S1-1	SEMA4A	-0.322514471277551	3.47957019570999	-8.88770950630899	0.000182107336832512	0.0546711512370985	1.08330362272122
P82912-1	MRPS11	0.335061912071539	3.32781284390237	8.00408515137934	0.000312476423815128	0.0601302861595805	1.02765806755635
Q5R3I4	TTC38	-0.284413455296582	3.26893639838827	-7.98638441108878	0.000316039195100736	0.0601302861595805	1.0012434157791
O94925-3	GLS	0.410399191029622	3.34691413422175	7.98327233782989	0.000316670483048624	0.0601302861595805	0.960331052405162
Q9NSE4	IARS2	0.284128751414817	3.32778711317665	8.59553057382066	0.000216523950646335	0.0546711512370985	0.890421537828984
P22695	UQCRC2	0.305309285819051	3.2958514439903	8.28625535463561	0.000261562343836077	0.0601302861595805	0.834762956049563
P60842	EIF4A1	-0.0890254201825652	3.27626575718892	-8.82265104234846	0.000189180274247731	0.0546711512370985	0.773847037632539
P12694	BCKDHA	0.20293851811862	3.37899475638195	7.95713668226322	0.000322030690530333	0.0601302861595805	0.762427375144119
Q9NXV6	CDKN2AIP	-0.144376545754516	3.36606855505621	-7.90070936563418	0.000333969231331264	0.0606740857569933	0.696336599854559
P25705-1	ATP5A1	0.178849033435739	3.39807725626773	9.05087371078555	0.000165688874243096	0.0546711512370985	0.694959100782508
P56181-2	NDUFV3	0.188149226517324	3.41310949770257	7.82347614252464	0.000351158385618196	0.0621180702138294	0.682556032035707
P40939	HADHA	0.251213135494614	3.35587671967804	8.67132538583137	0.000206913739744333	0.0546711512370985	0.639171170875663
P11717	IGF2R	0.0793812392156893	3.38744945330035	8.61283457078817	0.00021428470306822	0.0546711512370985	0.612797229704809
Q9NYK5-1	MRPL39	0.306824641638817	3.31995444205061	7.54103969831715	0.000423459971793838	0.0694267787901995	0.574075043364076
P51649-2	ALDH5A1	0.240824842715017	3.40512204870798	7.36463145270124	0.000477441222868871	0.0764133309553464	0.483960820812275
Q16836-2	HADH	0.164559000464046	3.42363134810281	8.01149148926638	0.000310999633158758	0.0601302861595805	0.473365238399312
Q10713	PMPCA	0.251438347584311	3.35856075343751	7.55324426717753	0.000419996488058434	0.0694267787901995	0.290880632171104
Q02218	OGDH	0.185909051372365	3.3527367816116	7.70311411012961	0.000380051154751666	0.0655052272369409	0.278069995041513
Q9BYC8	MRPL32	0.37736671907621	3.34010949215371	6.72948691521312	0.000750936793801809	0.0931815293169086	0.176410038881484
Q8TF72	SHROOM3	0.220964562614205	3.38337382052181	6.86395287989372	0.000680334179990113	0.0931815293169086	0.173743492774465
Q68CZ2-1	TNS3	0.0703977039448147	3.42696857248011	7.99322633453954	0.000314656466024369	0.0601302861595805	0.168012098332769
P05165-1	PCCA	0.243495573489478	3.37631868021095	7.16565356285941	0.000548238612399437	0.0818946656122004	0.153331101892524
P25788-1	PSMA3	-0.124734244920721	3.32545704180047	-7.29127141696925	0.000502226064086429	0.0785107814602087	0.0833422456638679
Q96CU9	FOXRED1	0.279877564309516	3.38338229770312	6.7539179297398	0.000737497679958289	0.0931815293169086	0.0671082229242597
O75626-1	PRDM1	-0.192645023394624	3.42909806023602	-6.78414572160294	0.000721255316455569	0.0931815293169086	0.0558771223811174
P10515	DLAT	0.260889372529181	3.30309701876393	6.90731521099443	0.000659235795294039	0.0931815293169086	0.0482076776247986
Q92947-1	GCDH	0.264235032209409	3.38496068870864	6.86777642727061	0.000678442508832025	0.0931815293169086	0.0449755622878802
Q08116-1	RGS1	-0.251421090835405	3.4261131140776	-6.49775319821381	0.000893644056523867	0.097630730407968	0.00678357319053458
P11142-1	HSPA8	-0.0854401601967935	3.32073537567878	-8.71985591845989	0.000201022519440961	0.0546711512370985	-0.00584679750408945
Q5HYK3-1	COQ5	0.286610261991252	3.40684893174844	6.4714159359827	0.00091177801157837	0.097630730407968	-0.0421396074312632
P34897-1	SHMT2	0.218840576224917	3.34521004855452	7.2525638193584	0.000515906843391084	0.0788164954835197	-0.0464368113375082
Q4G0N4	NADK2; NADKD1	0.242241789864404	3.34260536295804	6.44248269730854	0.000932194295009097	0.097630730407968	-0.0987346078665743
P52788-1	SMS	0.154323821015628	3.25104729090753	6.67869001871905	0.000779802089594874	0.0936041008260133	-0.131272856041443
Q16795	NDUFA9	0.163723535612365	3.32552482997607	6.7090119965965	0.000762419534726268	0.0931815293169086	-0.13726661666583
P48047	ATP5O	0.28472235428595	3.41381984597753	6.80726567557527	0.000709112805384462	0.0931815293169086	-0.161858339164832
Q9Y276	BCS1L	0.264169618468524	3.13518197011074	6.31099464472264	0.0010319330590904	0.097630730407968	-0.17304319288993
Q9Y676	MRPS18B	0.37031065439629	3.28079772195433	6.22221787280072	0.00110629508406482	0.097630730407968	-0.198487162344755
Q9Y3C8	UFC1	-0.151093463106988	3.39357603645518	-6.53233419459761	0.000870466716111259	0.0975212877616648	-0.235756747390375
Q9BPW8	NIPSNAP1	0.222695989451013	3.40836593529658	6.20151148762275	0.00112452268220671	0.097630730407968	-0.241342277380467
Q9Y4C2-1	FAM115A; TCAF1	0.124982054771408	3.18729262036547	6.57545083597362	0.000842540316599235	0.0975212877616648	-0.274408302951385
P43155	CRAT	0.295270758057332	3.30512701403966	6.13095687527387	0.00118930068573601	0.097630730407968	-0.290795882899404
Q96HY7	DHTKD1	0.293521629578617	3.19953777132315	6.12919495384312	0.00119097290887435	0.097630730407968	-0.30881559237663
O00505	KPNA3	0.205076187289341	3.19092151457346	6.15523951812014	0.00116652941133847	0.097630730407968	-0.316123112067088
Q96A33-1	CCDC47	0.16438180794294	3.25720852694851	6.7787114999845	0.000724144364219841	0.0931815293169086	-0.34044304122746
O75880	SCO1	0.753369268501565	3.14892340591677	6.03789609276071	0.00128147601651975	0.101762042434538	-0.348882542150123
P45954	ACADSB	0.288119565843135	3.29421551042002	6.26902005024435	0.00106634441623466	0.097630730407968	-0.388396869301853
O75208-1	COQ9	0.218186434052785	3.37069582302336	6.01612701104876	0.00130421730634964	0.101762042434538	-0.406100701047865
O43615	TIMM44	0.238345569667221	3.32374098687558	6.43865499704071	0.000934934837658016	0.097630730407968	-0.434659430630645
Q9UKY7	CDV3	-0.154436505318267	3.37925077637324	-6.80208144679628	0.000711814718222309	0.0931815293169086	-0.449367499440025
O94925-1	GLS	0.221627715345232	3.34487828221503	5.9514659837143	0.00137457460275649	0.10381899415426	-0.45193450371292
O95139	NDUFB6	0.587616304662561	3.15135469492917	5.87149866979927	0.00146775459709199	0.109348274148934	-0.464595016002816
Q9BU61-1	NDUFAF3	0.23751409920643	3.39544180824143	6.02408034407599	0.00129585496784552	0.101762042434538	-0.465008547726
Q16698	DECR1	0.21926507504082	3.40467450393087	6.22742318777164	0.00110176697776323	0.097630730407968	-0.467106016027365
Q7Z7L1	SLFN11	0.136536413757882	3.40373579169323	6.28078670645038	0.00105656535626085	0.097630730407968	-0.481332184617107
Q7Z3D6-2	C14orf159; DGLUCY	0.26936675313681	3.40017720929956	6.00402399490895	0.0013170630306166	0.101762042434538	-0.544463660470903
Q6UB35-1	MTHFD1L	0.297562140725825	3.09762673527113	6.21052559149917	0.00111654516693199	0.097630730407968	-0.556525305952581
Q96HP4	OXNAD1	0.359315484480183	3.37867659894846	5.77134260574818	0.00159496462406902	0.111736137961894	-0.568568732223785
Q9Y2Q3-1	GSTK1	0.111405477681588	3.45972521354169	6.54674708589516	0.000861013510684805	0.0975212877616648	-0.614702192582767
Q9NUB1	ACSS1	0.18596296955561	3.39688523411005	6.30303508458422	0.0010383581883105	0.097630730407968	-0.621620815500557
Q9H936	SLC25A22	0.25843165677408	3.23133649979747	5.77213784124849	0.00159390551676066	0.111736137961894	-0.648076026650657
Q9Y2Z2-6	MTO1	0.255717057778764	3.28679861834177	5.58386192674777	0.00186901666610101	0.116896390936934	-0.703991986109992
O76031	CLPX	0.203154702782428	3.26962709802593	6.18300081528753	0.0011411129607117	0.097630730407968	-0.729225022102031
O43837-1	IDH3B	0.16577649458688	3.36765215778266	6.28463591563546	0.00105338897136655	0.097630730407968	-0.729604229876778
P42765	ACAA2	0.197001588446227	3.39799935652799	6.3666763993108	0.000988254434863096	0.097630730407968	-0.749302962931528
O60613-1	SEP15; SELENOF	0.241947297204388	3.42478226034021	5.56241679853835	0.00190370508922772	0.116896390936934	-0.759987530762696
Q92506	HSD17B8	0.161660976490333	3.39036247303108	5.69852342729796	0.00169549034098679	0.111736137961894	-0.774843168495472
Q08257	CRYZ	0.213671642209881	3.30222403176772	5.65542375172337	0.00175843631819246	0.112573418389426	-0.777746092707954
Q9H4K7	GTPBP5; MTG2	0.237784995214206	3.34958138916159	5.55243946918687	0.00192009701492677	0.116896390936934	-0.800275911273828
P20674	COX5A	0.212775822121335	3.29961334262634	5.83351120759482	0.00151456902608048	0.110662315144706	-0.812212803529395
O00483	NDUFA4	0.587752962312907	3.22705805493646	5.43931671120181	0.00211782300024734	0.121527108007374	-0.889210782308409
Q8NC60	NOA1	0.262583167823217	3.29295870641779	5.65548097073749	0.0017583509784957	0.112573418389426	-0.900166106420919
P51398-1	DAP3	0.147687822903116	3.3156392846548	5.7264240258229	0.00165613155692278	0.111736137961894	-0.903926709877635
Q9NP92	MRPS30	0.277815798592478	3.29295172809136	5.52506994973348	0.00196590657709618	0.116896390936934	-0.912029051228973
Q86VI3	IQGAP3	0.146210099056053	3.23029867182788	5.73409426534168	0.00164549720971402	0.111736137961894	-0.938218976925064
O00469-2	PLOD2	0.215813920625553	3.00890549468051	5.58560678637158	0.00186622655340296	0.116896390936934	-0.95485017368819
P31930	UQCRC1	0.308972010822105	3.27035860446855	5.86116842077275	0.00148031730847262	0.109348274148934	-0.97098782487237
Q9H9J2	MRPL44	0.238377666609736	3.33872718562358	5.51159896037745	0.0019889163793649	0.116896390936934	-0.971467976560617
Q9Y6R9	CCDC61	-0.515294208710636	3.35138367983363	-5.50525283620369	0.00199986387351197	0.116896390936934	-0.990542224162499
Q5JPH6-2	EARS2	0.243516242103981	3.29187525700779	5.30707264263005	0.00237946940585911	0.130548235673068	-1.00601122233064
P10606	COX5B	0.289186519139104	3.2498896269834	5.30267620342466	0.00238878800770416	0.130548235673068	-1.01521892645972
P62910	RPL32	-0.0971301119611747	3.2992199379912	-6.32934500173752	0.00101729532988589	0.097630730407968	-1.02248989145954
P32322-3	PYCR1	0.155282500315721	3.24082060204895	5.71281689212086	0.00167519330121309	0.111736137961894	-1.02769661598276
P22626	HNRNPA2B1	-0.0635548116615959	3.26989581742421	-6.54527319571184	0.000861974716881898	0.0975212877616648	-1.0481551808703
Q8NEY1	NAV1	-0.131012939782766	3.32684277702043	-5.66766837510529	0.00174028262717839	0.112573418389426	-1.09255785205017
Q9UKU7	ACAD8	0.218035564526313	3.38010789266456	5.3478873326709	0.00229493104526081	0.12855438738536	-1.10137711442185
Q8IXI1	RHOT2	0.237751191789233	3.21436810610685	5.1865942681182	0.00265073974497232	0.133971974178225	-1.10462519387184
Q8WWC4	C2orf47; MAIP1	0.291935107438132	3.28700215943975	5.16314270189257	0.00270759616946232	0.135824339187505	-1.14698473913974
P43897	TSFM	0.252394133394688	3.27734948634845	5.43599775830952	0.00212396971592007	0.121527108007374	-1.15696090465901
Q14865	ARID5B	-0.26010593597341	3.29752776014357	-5.06099515330802	0.00297219575676241	0.140071553923116	-1.16227501455612
Q96RQ3	MCCC1	0.219311985447443	3.37731023307777	5.71047546521544	0.00167849885137023	0.111736137961894	-1.16825055113947
Q96RP9	GFM1	0.273984020084313	3.34939966937374	5.95213077977126	0.00137382920314628	0.10381899415426	-1.16863831113664
Q8WVM0	TFB1M	0.271884929988051	3.19897579161124	5.0399582124706	0.00303031590889346	0.140071553923116	-1.17047922200545
P49590	HARS2	0.27559123080698	3.3032452811239	5.01501955937368	0.00310091606861241	0.140071553923116	-1.17326898105755
Q9H9P8-1	L2HGDH	0.159167348230257	3.27641893036693	5.33156357482357	0.00232831955796295	0.12934681048452	-1.17645068717536
O00411	POLRMT	0.204486624346175	3.26140028779835	5.53774651655997	0.00194453409481414	0.116896390936934	-1.1946760136931
Q9NW81-4	ATP5SL; DMAC2	0.320162984506328	3.38991031031434	4.98927383544925	0.00317579219066304	0.140071553923116	-1.22821446156769
Q9NP81-1	SARS2	0.1996906466958	3.27839606691701	5.18881374167996	0.00264543038614917	0.133971974178225	-1.26699072026756
Q96DV4	MRPL38	0.239924111100392	3.3272462216711	5.26820359501232	0.00246333153105822	0.132468116414187	-1.29706588813872
O95299	NDUFA10	0.279986171201432	3.34609317291273	5.27290954262863	0.00245299903969615	0.132468116414187	-1.29786589016501
Q9NVV4	MTPAP	0.285709351173285	3.29147004240398	5.18958258506426	0.00264359403842535	0.133971974178225	-1.30898702146186
P35221-2	CTNNA1	0.11436387923347	3.11621030284323	5.53116563212615	0.00195559567394022	0.116896390936934	-1.31348723691871
Q5T9A4	ATAD3B	0.276671636728298	2.68564854894961	4.85188486028223	0.0036122566203252	0.148085626523341	-1.31646747692728
Q99798	ACO2	0.208248552660778	3.39365567005055	6.17375125319144	0.00114950922794586	0.097630730407968	-1.32461460871708
P42704	LRPPRC	0.280068129228936	3.26827423163894	6.32019375146617	0.00102456475863066	0.097630730407968	-1.3254037337477
Q6NVY1	HIBCH	0.197576907652475	3.34208564207781	5.2024629559772	0.00261304709646798	0.133971974178225	-1.33016987475199
P46778	RPL21	-0.0844825462463318	3.29416837414503	-5.70341289943802	0.00168851534129214	0.111736137961894	-1.33721166944982
Q08174-2	PCDH1	-0.23442986701655	3.35336398948511	-5.06080399447866	0.00297271808034795	0.140071553923116	-1.35223936271905
Q96EL3	MRPL53	0.185156879529528	3.28592289240993	4.9886985274882	0.00317748893600222	0.140071553923116	-1.36084349575664
Q9GZT6	CCDC90B	0.304514748154105	3.36362093008185	4.90164567192004	0.00344666464907658	0.147569934847725	-1.37019968793053
Q16690	DUSP5	0.450299557549682	3.42449799617277	4.77416205204357	0.00388950821016159	0.149401566792607	-1.38296428424596
O43772	SLC25A20	0.354904247812859	3.2724274735798	5.00465688600069	0.00313080709705415	0.140071553923116	-1.3858330825935
Q07021	C1QBP	0.112271187158767	3.27595634229776	5.77587569881759	0.00158893826740495	0.111736137961894	-1.39095293295612
P08574	CYC1	0.320042789077365	3.21812169424768	5.2459112318146	0.00251296381140848	0.133260429060839	-1.39352974853592
P11182	DBT	0.160571041679265	3.37943393200898	5.12626864283441	0.00279985803466239	0.137050657223635	-1.41218261755528
Q969Z0-1	TBRG4	0.295760049092192	3.22960451407241	5.00414145237796	0.00313230248502565	0.140071553923116	-1.4145462678387
Q9Y697	NFS1	0.176141772404219	3.32074719910431	4.98508156736077	0.00318818026632502	0.140071553923116	-1.42765485309962
Q8TAE8	GADD45GIP1	0.148878897469697	3.33498458946576	5.04289108436699	0.00302213518853471	0.140071553923116	-1.43472367116637
Q8TDB6-1	DTX3L	0.330108626603129	3.33458379797073	4.7954571928314	0.00381118913843173	0.148085626523341	-1.43712365825596
Q7KZN9	COX15	0.3898491356382	3.1870443591138	4.67337863103662	0.00428611721003655	0.153727236604719	-1.4716303852034
P82914	MRPS15	0.16408109020902	3.27596331184266	5.03646225644452	0.00304010053795664	0.140071553923116	-1.47309327456466
Q96AQ8-1	CCDC90A; MCUR1	0.20968918962515	3.3336460171908	4.74924235963419	0.00398351112771901	0.151011539744816	-1.47927090314188
Q9UKD2	MRTO4	-0.0921481848905977	3.30921844645046	-5.36768433635825	0.00225517667107754	0.127389055319187	-1.50535370690813
P05166-2	PCCB	0.258163261420116	3.37765235305814	5.13562359554388	0.00277611312290358	0.137050657223635	-1.50635625158058
P30042-1	C21orf33; LOC102724023	0.258773910797971	3.42563691470524	5.53702334511665	0.00194574610739052	0.116896390936934	-1.51765217334907
Q8IVS2	MCAT	0.20270823227236	3.3211761419136	5.04412875662316	0.00301869054532824	0.140071553923116	-1.52302610991421
Q8TCC3-2	MRPL30	0.245498713311384	3.3463081000279	4.67018483983972	0.00429942286249436	0.153727236604719	-1.56351894013732
Q93008-3	USP9X	0.0590763692455733	3.29324450728895	5.75568597273759	0.00161598312997027	0.111736137961894	-1.57499872202206
Q9BYD6	MRPL1	0.190328748879617	3.3301791533678	4.95186176060574	0.00328833179975233	0.1435335477788	-1.57815043940521
P14866	HNRNPL	-0.0519195709692706	3.26900792989429	-6.09528719975481	0.0012236917863699	0.0991042914214273	-1.58549456443477
Q8IXM3	MRPL41	0.705307486884251	3.40562252778511	4.67806812815814	0.00426666564671117	0.153727236604719	-1.58937636007567
Q8N0T1	C8orf59	-0.173336867495887	3.26599372433135	-4.69048508250804	0.00421564766716903	0.153727236604719	-1.59146299272672
P11021	HSPA5	-0.10509912440851	3.36426433611604	-6.26840021935233	0.00106686245267344	0.097630730407968	-1.65380305005761
Q15119-1	PDK2	0.208324163109217	3.31264696665802	4.57482340496316	0.0047193629301459	0.161951872239287	-1.65819584560135
P14621	ACYP2	0.245582395420486	3.47352884316427	4.51526779568619	0.00500538692494969	0.16412785809518	-1.66829597016858
P36542-1	ATP5C1	0.201836224425978	3.39945042767811	5.43096848772377	0.0021333232289304	0.121527108007374	-1.67604963112878
Q9Y6M9	NDUFB9	0.240714887159819	3.22488176601577	4.46166434484967	0.00527986439391591	0.167746425939604	-1.69338888792875
P23378	GLDC	0.296656824027161	3.34683904879367	5.21757350201758	0.00257772793936678	0.133971974178225	-1.69577508114283
P53597	SUCLG1	0.21560094106026	3.36964806160311	5.11298245328878	0.00283398413479401	0.137050657223635	-1.69833704705819
Q96BW9-3	TAMM41	0.304671275334917	3.33129733594218	4.43762240745605	0.00540852632114981	0.170685980895629	-1.69878215486863
Q96GJ1	TRMT2B	0.21821420368323	3.26723849868405	4.48911283820945	0.00513722380314605	0.165907566954799	-1.71149862895238
P62854	RPS26; RPS26P25; LOC101929876	0.133197128165674	3.30731060589779	4.85197685101029	0.00361194218585071	0.148085626523341	-1.73529285438443
P05141	SLC25A5	0.364040759600509	3.18689491042232	4.79967551033674	0.00379589049812736	0.148085626523341	-1.74110611134536
O43819	SCO2	0.317509167301607	3.26199654342183	4.55421213480812	0.00481618308627011	0.16254842716353	-1.77820161246564
O95785-3	WIZ	-0.139473526306385	3.19748600792436	-4.81188327613425	0.00375201169711241	0.148085626523341	-1.78046853760129
Q96A35	MRPL24	0.223664734724639	3.36956934584583	4.61555659260266	0.00453449409165838	0.157192773666145	-1.78633584840302
O75323-1	GBAS; NIPSNAP2	0.215263997638858	3.39271974518025	4.62154806362676	0.00450800669579991	0.157192773666145	-1.78815130159199
Q02252	ALDH6A1	0.270516307788697	3.37376691265631	5.02380818045847	0.00307582227120311	0.140071553923116	-1.80636524965322
P26440	IVD	0.177402042480099	3.36200542584646	4.99015470330929	0.0031731962803428	0.140071553923116	-1.83017572312477
Q9UBW7	ZMYM2	-0.154248151536795	3.11023997291922	-4.80410518188759	0.00377990109243538	0.148085626523341	-1.84443646733419
Q8N5N7	MRPL50	0.11242544100527	3.41840244349976	4.83365059194184	0.0036752081284645	0.148085626523341	-1.8637765921637
Q5ST30-4	VARS2	0.198905019882516	3.27202181860839	4.54493678128617	0.00486049298718679	0.16254842716353	-1.87222378781525
Q9NUJ1	ABHD10	0.253160940180346	3.31522466605299	4.56704025262778	0.00475565990794871	0.162268840113088	-1.87444801939376
P63173	RPL38	-0.11788114090081	3.31967593178859	-4.80700447380765	0.00376947759058865	0.148085626523341	-1.88097344875198
O60232	SSSCA1	0.10674598799918	3.38460990245176	4.77899508126166	0.00387157272050433	0.149401566792607	-1.89836209145196
Q7Z434	MAVS	0.226105908832402	3.29780387107728	4.41869585085982	0.0055123334073932	0.170755323338696	-1.89932086230435
P16278	GLB1	0.0930230193446484	3.34975274579688	4.86330162887257	0.00357347168593901	0.148085626523341	-1.90950758488121
Q9P0K7-2	RAI14	0.109723239811495	3.22722553624491	4.8633323328875	0.00357336802488244	0.148085626523341	-1.91962704080329
Q53RE8	ANKRD39	-0.164405159344469	3.39101669152334	-4.48019687401965	0.00518306888731147	0.165907566954799	-1.93070934216065
Q96PM5-1	RCHY1	0.226038070317345	3.29022655572812	4.21891485072389	0.00675856163658347	0.183708288607226	-1.94752647864604
P57737-3	CORO7-PAM16; CORO7	0.210980712170325	3.37159674877134	4.5089778334741	0.00503673559355434	0.164354061455691	-1.94832786349735
O00217	NDUFS8	0.256702764239399	3.3845780915833	4.70417732829345	0.00416019799491044	0.153653027042791	-1.95709261380339
Q96A26	FAM162A	0.34393067063088	3.149270453752	4.30357528191512	0.00619492604274785	0.179492641635134	-1.96335756595642
P08559-4	PDHA1	0.188614780215359	3.30631021738413	4.73464105710405	0.00403979958573776	0.151011539744816	-1.9738466482964
Q7L8L6	FASTKD5	0.198935846968613	3.26407222473698	4.5165526638876	0.00499901069873965	0.16412785809518	-1.97768716742238
Q9UG63-2	ABCF2	-0.0795629870030153	3.33727787510094	-5.11812838712386	0.00282071011771056	0.137050657223635	-1.98054616777012
O95167	NDUFA3	0.282312032695623	3.30808760772364	4.40940824720335	0.00556410372690929	0.170784955489882	-1.98534825167618
P51159-1	RAB27A	0.128880119753543	3.39397146397527	4.57421455770612	0.00472219085969954	0.161951872239287	-1.9856123962304
Q15120-2	PDK3	0.17993777054188	3.34693910538696	4.25920407431565	0.00648336060078827	0.179620923486501	-1.98961666367489
P21912	SDHB	0.19396436889029	3.38119227089945	4.86761632131851	0.00355893845339603	0.148085626523341	-1.99968159121701
Q6XZF7	DNMBP	-0.178291753320654	3.29613591707803	-4.42233368765874	0.00549220558505203	0.170755323338696	-2.00978911791031
Q9BYD3	MRPL4	0.170960589993558	3.39130100583899	4.42138627440121	0.00549743944932023	0.170755323338696	-2.0261515836985
P23786	CPT2	0.233835702911569	3.34725394585526	4.83735501259223	0.00366231785484307	0.148085626523341	-2.03815975872028
Q9BXK1	KLF16	-0.358043570352102	3.29555487024653	-4.06499557791863	0.00793938919030769	0.195865492544812	-2.04618742167449
P50213-1	IDH3A	0.219421906220785	3.3655682460198	4.67105910076707	0.00429577590903882	0.153727236604719	-2.04981579173841
P36957	DLST	0.218056128600742	3.32175078532121	4.73674321826411	0.00403163979809233	0.151011539744816	-2.05730417925174
P31040	SDHA	0.280644490483363	3.37692822845712	5.22047291709531	0.00257101393913886	0.133971974178225	-2.06475642023299
O43716	GATC	0.224664009876216	3.24007928733774	4.2068899091896	0.00684325726049921	0.183708288607226	-2.07138915536961
Q8WUK0	PTPMT1	0.253000428219388	3.38925256944502	4.03238452165572	0.00821866214025588	0.196604437390748	-2.08438948600545
Q08AF3-1	SLFN5	0.119300471225034	3.39636715807361	4.52889244673642	0.00493824417788952	0.16412785809518	-2.0943822945962
Q14137	BOP1	-0.121620411142063	3.26752322147885	-4.84531465309971	0.00363479576508875	0.148085626523341	-2.09471885950852
P12814-3	ACTN1	0.241499891760237	1.84876394557373	4.4596657507169	0.005290425810651	0.167746425939604	-2.09655459012773
P82675	MRPS5	0.166639751095185	3.24731131680802	4.3791727278411	0.00573652234453089	0.17505378659382	-2.09926313143554
P35232	PHB	-0.189362035120382	3.36886686567194	-4.92553449858463	0.00337027559893101	0.146161242425898	-2.1297863192276
P54098	POLG	0.247342722084443	3.22335370635247	4.20804721217995	0.00683505371729924	0.183708288607226	-2.13138328846251
O75127	PTCD1	0.212502324763453	3.2248013616763	4.06399556358862	0.00794779146046159	0.195865492544812	-2.13368658827103
Q96CS3	FAF2	0.159346324436964	3.20714730562511	4.3343987522818	0.00600315731175999	0.177451872037985	-2.14223800009972
P21397	MAOA	0.412283959996162	1.43415555730881	3.98437256877042	0.0086503260748787	0.19961582441403	-2.14712046399517
Q5JRX3	PITRM1	0.197055094354654	3.31408680224081	4.85985619086744	0.00358512591993525	0.148085626523341	-2.15367856330508
Q9H0R6-1	QRSL1	0.24277605716377	3.20603240176057	3.97788354022423	0.00871061397804414	0.19961582441403	-2.15376573784875
Q9H845	ACAD9	0.199280260375012	3.33898846994571	4.7278693478565	0.00406621373011182	0.151011539744816	-2.1705067095419
Q9HBG7-1	LY9	0.115593658020389	3.38268612652621	4.35291389408804	0.00589122004748431	0.176789201603525	-2.17556017861751
Q96AQ6	PBXIP1	0.114210248704715	3.3862865063274	4.90656542338338	0.00343077161096086	0.147569934847725	-2.18077771544068
Q13435	SF3B2	-0.0718138866534464	3.28938939461253	-5.2438042569545	0.00251771414619556	0.133260429060839	-2.18942277897833
O60925	PFDN1	-0.199810232638061	3.33389643177412	-4.31596651277891	0.00611700701230641	0.178002256003133	-2.19304031892586
Q9BXW7	CECR5; HDHD5	0.154600366255069	3.27373897798205	4.28433360003442	0.0063181736258778	0.179620923486501	-2.19917845543066
P61247	RPS3A	-0.0829880279016196	3.30978593827511	-5.14319087892082	0.00275707517887169	0.137050657223635	-2.19937738139563
O60830-2	TIMM17B	0.438082647372016	3.05636957041631	3.98026363989955	0.00868844599876781	0.19961582441403	-2.20338514262277
Q9BYD1	MRPL13	0.161707592866065	3.39524121026366	4.10068463499923	0.00764601975977567	0.193719027072779	-2.20477587170368
Q9UIJ7-1	AK3	0.209616670889879	3.4810887481207	4.63157421469508	0.00446407759500752	0.157107484783458	-2.20834486526226
Q8TB03	CXorf38	0.20943311647427	3.34524573836064	4.25372747488109	0.00652000971893875	0.179620923486501	-2.21826545582323
Q9Y5B8	NME7	0.17695801421539	3.1546761719579	4.18758544101317	0.00698176136559433	0.183708288607226	-2.23065420110233
P67809	YBX1	-0.208690779628356	3.27090713297359	-4.817872467399	0.00373069743161751	0.148085626523341	-2.25337909940938
Q8WUX9	CHMP7	-0.126807429469253	3.38730610958488	-4.42047717529505	0.00550246700304341	0.170755323338696	-2.25652743716558
O75150	RNF40	-0.091968498408971	3.28525135856018	-4.68467632113722	0.00423942685836004	0.153727236604719	-2.25771662312183
Q9P0M9	MRPL27	0.182246070493658	3.35541517744542	4.35769954784092	0.00586267554181638	0.176789201603525	-2.2664796709774
O95822	MLYCD	0.172727277203576	3.33994812769155	4.04919111166897	0.00807336791995552	0.195917614288596	-2.28008726282471
Q6P179	ERAP2	-0.0786377391499744	3.38989028324665	-4.66104669269074	0.00433775529944938	0.154277201708459	-2.28087556863825
Q96I51	WBSCR16; RCC1L	0.351109869928651	3.31253474082566	4.03322187799877	0.00821135335453285	0.196604437390748	-2.28391537648752
Q9P0I2	EMC3	0.26969414556468	3.20893869298129	3.95809838343542	0.00889738980890739	0.200698839917703	-2.28844870783447
Q86SX6	GLRX5	0.217265123471589	3.37690210568464	4.23793120354828	0.00662704520411777	0.181824481069713	-2.2998235179991
Q15031	LARS2	0.255807371840587	3.21253910010522	4.25472785063432	0.00651329769268133	0.179620923486501	-2.30062974015947
Q96CB9	NSUN4	0.241342439314694	3.37853426348212	4.05220128206745	0.00804765345116558	0.195917614288596	-2.30300431276388
Q9H814	PHAX	-0.120642202896793	3.35201196423429	-4.63963154753548	0.00442912959943606	0.156697942986364	-2.3135720977337
Q8N5K1	CISD2	0.186509867385624	3.25291424448	3.95047920902732	0.00897052210503863	0.201228807158008	-2.3159871229922
Q9HD33-1	MRPL47	0.159198406143865	3.34924233586642	4.06317800855372	0.00795466817386695	0.195865492544812	-2.31649210874981
Q16134	ETFDH	0.215396630979825	3.40180786398283	4.34027184725735	0.00596738984675833	0.177451872037985	-2.31889361748911
Q9H4B0	OSGEPL1	0.234549666081173	3.26243308457702	3.80518301816216	0.010503897062374	0.209516902235247	-2.32703481828524
Q9Y282-3	ERGIC3	0.133945382534333	3.41088139739068	4.29671863964023	0.00623852778357896	0.179620923486501	-2.32873977506828
Q8IVH4	MMAA	0.189087475466739	3.37389238224679	3.88102842363201	0.00966942545477979	0.204246220619271	-2.32963202820223
Q5T160	RARS2	0.20785015453462	3.32246592899791	3.86130908784233	0.00987894230603147	0.205770540305086	-2.3439056765924
Q9UFN0	NIPSNAP3A	0.218664629295361	3.41780902123169	4.32318239472256	0.00607214643477581	0.177465079715491	-2.34600790596608
Q9NX14-2	NDUFB11	0.47681632152044	3.19715522309263	4.14233297023236	0.00731910345922791	0.187782494095153	-2.34935730249303
Q6IN84-1	MRM1	0.211315207900689	3.36611458809572	3.8456200652598	0.0100493039077372	0.205949453865273	-2.3505661714511
P23193	TCEA1	-0.109256827681537	3.27823525199167	-4.74368620987523	0.00400482364839209	0.151011539744816	-2.35399380407724
Q9H3M7	TXNIP; LOC101060503	0.22489732136655	3.45536041494827	3.90542329311692	0.00941714619369305	0.202847958549269	-2.36246175060746
Q5UCC4-1	EMC10	0.189029012060666	3.25238947607968	3.86196874892983	0.00987185106878975	0.205770540305086	-2.36247095206341
Q9NVH6-8	TMLHE	0.291308591907293	3.24747964615455	3.73276419053557	0.011377210748038	0.215702792209718	-2.36820052346293
Q9UGN4-1	CD300A	0.233162478251407	3.44634778964015	3.76391114998829	0.0109919466969512	0.214167726657699	-2.36912378952503
P82663	MRPS25	0.153227557502234	3.32787234375297	4.1855804017403	0.00699632875386045	0.183708288607226	-2.36977555009954
Q16822-1	PCK2	0.135598571186853	3.01638724249938	4.00237334165203	0.00848554421933395	0.198745046140637	-2.39155421806035
Q9BQP7	C20orf72; MGME1	0.138083333006341	3.07038514146648	3.99082151443446	0.00859087831565011	0.199130634613104	-2.39556279927915
Q9BUB7	TMEM70	0.344277441797524	3.24365744130757	3.90179356973781	0.00945420737308579	0.202847958549269	-2.41331945997883
Q9UL46	PSME2	-0.119655650432118	3.39766822365464	-4.48829212319775	0.0051414244363134	0.165907566954799	-2.41449341686772
Q14517	FAT1	-0.142485895063797	3.35432319373651	-4.56191989321752	0.00477971293400647	0.162268840113088	-2.42055754654252
Q9BX68	HINT2	0.212466470488595	3.2305750126824	4.07351642072888	0.00786820304366636	0.195865492544812	-2.42242232892169
Q8NE86	MCU	0.365354471272584	3.10483441361134	3.95916328519936	0.00888722224745007	0.200698839917703	-2.43332144187781
Q8N806	UBR7	0.163829394177548	3.22932025946492	4.32636854285377	0.00605245777344623	0.177465079715491	-2.43429563360082
Q9BQ69	MACROD1	0.234237091137352	3.34172743526309	4.01936482208226	0.00833325730167259	0.198638849581004	-2.43473364249714
Q53H12	AGK	0.230289759540178	3.1999507039754	4.20062902018052	0.00688783216339363	0.183708288607226	-2.4658084030502
O75439	PMPCB	0.198625205816876	3.33348244565194	4.37594869107504	0.00575526433163257	0.17505378659382	-2.48424554414009
O15400	STX7	0.10832280293824	3.3808487378291	4.27580759866631	0.00637367562425881	0.179620923486501	-2.48746275975294
Q9H7H0-3	METTL17	0.271535469933643	3.28891114938962	3.65342092437043	0.0124292055264056	0.223393367776734	-2.48878070908052
Q9P0J0-2	NDUFA13	0.187738744189195	3.25722276141265	4.05614911962635	0.00801406959013902	0.195917614288596	-2.4893930912347
P04181-1	OAT	0.251511575403277	3.14228511102082	3.85129709040333	0.0099872788951427	0.205770540305086	-2.49595024754887
Q99714-1	HSD17B10	0.166592478738605	3.35281053575144	4.52276862166368	0.00496829444085754	0.16412785809518	-2.50016970637361
Q9BR76	CORO1B	0.133586829772551	3.10855313745534	4.07420156226744	0.00786251064896584	0.195865492544812	-2.50223041369521
P46199	MTIF2	0.234818849591044	3.29073443332566	3.99860705181496	0.00851972514976452	0.198852751585823	-2.50737889478253
Q12931	TRAP1	0.175481485715208	3.29262461078954	4.81974474637284	0.00372406290503225	0.148085626523341	-2.51121936070093
P60981-1	DSTN	0.134701417705373	3.34796247322706	4.33776245600716	0.00598264237784031	0.177451872037985	-2.51788494269468
Q9UHQ9	CYB5R1	0.116420719443945	3.37476157405086	4.27766634033233	0.00636152855285024	0.179620923486501	-2.51824023296135
Q9NZJ6	COQ3	0.234278763733042	3.28107117229739	3.81361738962507	0.0104071943202498	0.208827343942446	-2.51962839535959
P23368-1	ME2	0.214253295294538	3.40299092409144	4.35699772737044	0.00586685173809701	0.176789201603525	-2.52460430657943
Q9NWU1-1	OXSM	0.216382461150218	3.40490363527364	3.81456988600482	0.0103963369154047	0.208827343942446	-2.53495077649787
Q15118-2	PDK1	0.18564189273157	3.39214092545559	4.2105160961835	0.00681759037851345	0.183708288607226	-2.55163011130838
Q8N5M1	ATPAF2	0.194008592000798	3.34711560754014	3.68644477593267	0.0119785952971941	0.220603061884215	-2.57212887786375
Q96QC0	PPP1R10	0.129846239789323	3.30915186829754	4.25485729084551	0.00651242978761324	0.179620923486501	-2.57357712754622
Q9HA77	CARS2	0.14536750284919	3.37296985159926	4.00489782241172	0.0084627202812272	0.198745046140637	-2.5857214896314
A3KMH1	VWA8	0.256740497733361	3.29366475391599	4.25540495519523	0.00650875911856727	0.179620923486501	-2.58639451354937
Q13813-3	SPTAN1	-0.186452740755968	3.33142707688079	-3.75952520399391	0.0110452975047522	0.214585230713712	-2.58665375695083
Q6P3X3	TTC27	0.157051696225473	3.32127751935876	4.0982343699866	0.007665763344445	0.193719027072779	-2.5934690726477
O00512	LOC101060700; BCL9	-0.181404812672235	3.25333652482854	-3.75123863040015	0.0111468941410452	0.214606868770616	-2.59620740782167
Q6JBY9	RCSD1	-0.233005894076697	3.39318805737377	-4.48473810864194	0.00515966014279537	0.165907566954799	-2.59850866002542
Q86X95	CIR1	-0.177965420219398	3.33578188990014	-3.79316107510882	0.0106434896034054	0.211048782047466	-2.60429979611954
P47985	UQCRFS1	0.219715230136353	3.3041289972156	4.00688941617704	0.00844476326916561	0.198745046140637	-2.60480341669841
P24752	ACAT1	0.173513876286637	3.38815785190651	4.73184039639787	0.00405070010038449	0.151011539744816	-2.61661568751954
Q9BZQ6	EDEM3	-0.0815320841411594	3.39150414797312	-4.26465798280874	0.00644709615424301	0.179620923486501	-2.61856603964925
Q9UIA0	CYTH4	0.172607632511949	3.43480411683311	3.61173781433441	0.0130254129441554	0.226799620895595	-2.62054476959701
Q96E29	MTERFD1; MTERF3	0.146054154471934	3.31043130159461	3.85532872128648	0.00994349335107761	0.205770540305086	-2.62356374536583
Q9UI09	NDUFA12	0.116935117258157	3.36047030420209	3.91780274314821	0.00929197620680378	0.202003113546512	-2.62610771141803
O75414	NME6	0.233786672091209	3.34259955032559	3.56231409589343	0.0137743476556323	0.233155021634809	-2.62753281277381
Q9BW92	TARS2	0.193437314377163	3.25928512656353	4.13627793454071	0.00736563102868817	0.187921409269632	-2.62909637469988
P52789	HK2	-0.11940150455701	3.23639803796124	-4.26847706704457	0.00642183950996536	0.179620923486501	-2.63342864835246
Q8N490-2	PNKD	0.402980728503462	3.2386143613731	3.52378209060438	0.0143918002303349	0.235623788337841	-2.63399581560084
Q7Z7H8-2	MRPL10	0.205375715684717	3.33183075069295	3.94264771767463	0.00904640211985175	0.201228807158008	-2.63878357301314
Q9Y6G3	MRPL42	0.234571664275525	3.31724827503329	3.58309765288873	0.0134536724953971	0.23070302682158	-2.64090970174847
Q8N4Q0	ZADH2	0.205680716887323	3.27496428503702	3.55973634434316	0.0138147146804822	0.233155021634809	-2.64230643160714
Q8N442	GUF1	0.237394885611784	3.23038733138483	3.60601917095851	0.0131096868303016	0.22712194554971	-2.64661508720987
Q86YP4-3	GATAD2A	-0.0997225921260297	3.24181999701449	-4.18953646161362	0.00696761953336144	0.183708288607226	-2.65077673563254
Q01664	TFAP4	-0.15768942008109	3.33030886480413	-3.88998772118475	0.00957589579324951	0.204246220619271	-2.65116630872662
P05067-8	APP	0.136800777503541	3.2223908689356	3.93710964031729	0.00910049946087985	0.201228807158008	-2.65162264590995
Q5JPI3	C3orf38	-0.196743413283485	3.32134276060842	-3.80680058121543	0.0104852728883872	0.209516902235247	-2.65907265690047
Q53R41	FASTKD1	0.222733545854334	3.2780780391508	3.593619784158	0.0132945236079753	0.22914304536618	-2.66069149293105
Q969P0	IGSF8	-0.131580378052076	3.3498050364504	-3.73162215516792	0.0113916232125037	0.215702792209718	-2.66505929546127
Q7Z699	SPRED1	0.236418312039663	3.37817044345271	3.46352967786454	0.0154204381032882	0.240404454826983	-2.67261577366423
P21964-1	COMT	0.116445267010512	3.26352191209915	3.8710869352765	0.00977441895317218	0.205323888135073	-2.6808248799237
Q9H2K0	MTIF3	0.186567426445987	3.33937658736813	3.63628291608972	0.0126705436290646	0.224726633969847	-2.6824058922032
Q9NRG9-1	AAAS	0.136582231556515	3.29005549079776	4.0520128884145	0.00804926008238058	0.195917614288596	-2.69253031715449
Q9Y305-4	ACOT9	0.152612851706762	3.29317159831952	3.84921631625672	0.010009962314752	0.205770540305086	-2.6926736509871
Q8NCG7	DAGLB	0.165200207650844	3.35432328509139	3.8297785096655	0.0102246954866399	0.20639760679037	-2.69478642647776
P53007	SLC25A1	0.388207927797522	3.18316082161032	3.9160224339358	0.00930986074123921	0.202003113546512	-2.69832143683139
Q7L576-1	CYFIP1	-0.10055045254046	3.30834114346171	-4.16524589498775	0.00714603507397734	0.185465821495273	-2.700945484444
Q9BQC6	MRP63; MRPL57	0.239466415750413	3.34921854168936	3.62434018832486	0.0128418346505882	0.225451013682784	-2.70347357586258
Q9Y6H3	XRCC6BP1; ATP23	0.12943007685821	3.29344581176964	3.73242571195422	0.0113814801987494	0.215702792209718	-2.70617503960622
Q8WV28-1	BLNK	0.16328436197983	3.44932430551035	3.70768043085652	0.0116985517050539	0.218437957114922	-2.70865423854321
Q8NCN5	PDPR	0.146897220717685	3.29077380275411	3.90160743484202	0.00945611233794407	0.202847958549269	-2.7347713642046
P55084	HADHB	0.237900223351967	3.40475962104046	4.41387391502646	0.00553914258952984	0.170784955489882	-2.73590118015825
Q8N8Q8-1	COX18	0.334491069867929	3.15384687807158	3.44917838018561	0.0156774107627215	0.241152300107584	-2.73754326610727
Q9HC21	SLC25A19	0.377597129149749	3.17621763441185	3.48512739730588	0.0150425440598125	0.240061884817421	-2.74326722437172
Q99757	TXN2	0.207202458249961	3.3661820920258	3.72439326538899	0.01148333008069	0.216221133900276	-2.76375573488087
P63000-2	RAC1	0.111287962600991	3.32021162927531	3.74741322251871	0.0111941500802358	0.214606868770616	-2.79712620345176
Q9Y584	TIMM22	0.291758390357551	3.19580196931737	3.30383921690051	0.0185674747716467	0.24377063557619	-2.79755006758858
P12268	IMPDH2	-0.104583811546126	3.30116440906474	-4.61506945427404	0.00453665547325679	0.157192773666145	-2.79768682682337
P10768	ESD	0.139102241865726	2.93763165759912	3.94122324381758	0.00906028190077869	0.201228807158008	-2.79993488961305
O60716-1	CTNND1	0.21914642706949	1.83200600252906	3.84935138058842	0.0100084881555911	0.205770540305086	-2.8045741956209
Q9NYV6	RRN3	-0.172967731171292	3.25558228888212	-3.7176711357492	0.0115693546598086	0.217232407886127	-2.80842103177204
Q14644	RASA3	0.100311164235522	3.4388464360979	4.00654380648168	0.00844787632748007	0.198745046140637	-2.81277646780022
Q9Y4X5	ARIH1	0.0885021372108092	3.32653685989159	3.97574423103966	0.00873059392706409	0.19961582441403	-2.82121697761486
P67812-3	SEC11A	0.329590299010113	3.27695728948204	3.65349395843549	0.0124281881751594	0.223393367776734	-2.83569498913646
Q96EY8	MMAB	0.217485978268831	3.21522691545096	3.42880414170393	0.0160504912680009	0.243661001284326	-2.8436567832013
P07203	GPX1	0.110838867524043	3.25400513251376	3.7849951065479	0.0107395018179931	0.212326268295735	-2.85307125510557
P00403	COX2	0.40042584409106	3.09151456503556	3.53562639586346	0.014198760719042	0.234506313399018	-2.85746387290487
P41743	PRKCI	0.110821053385336	3.2673617154598	3.77403303843234	0.0108699287299792	0.213648131353569	-2.86517485497443
Q00839	HNRNPU	0.229169263515506	3.41073505052577	3.54338341779095	0.0140739089579321	0.23382252356165	-2.87386798761555
Q96AG3	SLC25A46	0.266387464851253	3.18316706340202	3.24462961862202	0.0199112173239403	0.251668342016868	-2.87581627542901
Q16718	NDUFA5	0.293249786615035	3.38605200385995	3.71383507360988	0.0116187706363558	0.21755257999327	-2.8778893318599
O00587	MFNG	0.414696879185374	3.42605013012145	3.20619678653644	0.0208411312776622	0.2565825722499	-2.88694859106545
Q9H300	PARL	0.270442416542051	3.1277169090955	3.31883022203126	0.0182434753115222	0.24377063557619	-2.90504487622999
Q92542-1	NCSTN	-0.133547091280001	3.24325759664748	-3.55786089076104	0.0138441672434691	0.233155021634809	-2.92650670413833
Q9H0A0	NAT10	-0.0716497697147432	3.32119909239429	-4.33182685424117	0.00601889717712892	0.177451872037985	-2.9272454504635
Q86XR8-1	CEP57	-0.187572267757885	3.32994056332455	-3.49461382766451	0.0148798448814392	0.239511998538254	-2.93428856546846
Q9Y3C1	NOP16	-0.102562088990144	3.28757698314636	-3.99159781531134	0.00858375346098917	0.199130634613104	-2.93545635918411
Q96CM3	RPUSD4	0.23120739095396	3.32627186739349	3.28141606841491	0.0190641233895291	0.246605353650512	-2.9357619538459
Q8TCS8	PNPT1	0.184213645736714	3.33100321639517	4.15002219133912	0.00726049900471228	0.187711824267984	-2.93938047710856
Q9HB40	SCPEP1	0.126823418689027	3.39224236632691	4.16643717426236	0.00713716493595443	0.185465821495273	-2.93941521683554
O15155	BET1	0.176721482898035	3.33291211936167	3.43365919953505	0.0159606963095858	0.243661001284326	-2.94017250072412
Q86YH6-1	PDSS2	0.22773992478427	3.27109087847786	3.38998405219043	0.0167891119607317	0.243661001284326	-2.94622860375247
Q9H2U2	PPA2	0.148608401001437	3.39258481208101	4.19959152349819	0.00689525054552169	0.183708288607226	-2.95003890009222
Q8NE62	CHDH	0.268346120893	3.30023573866149	3.3332568168601	0.0179376081210442	0.243661001284326	-2.96901750890022
P28331-2	NDUFS1	0.188379572861603	3.30277683424696	4.18920937333309	0.00696998813560946	0.183708288607226	-2.97091003383025
Q15418-1	RPS6KA1	0.0910336295562795	3.33907600804291	4.07172123481608	0.00788314025994086	0.195865492544812	-2.97238572234335
Q86UY8	NT5DC3	0.193707945173598	3.28176200959363	3.48796956337683	0.0149935908936494	0.240061884817421	-2.97732931014387
Q3SY69-1	ALDH1L2	0.27079351970996	3.2408290292208	3.88393273783333	0.00963899354276231	0.204246220619271	-2.97837473512453
O75648-1	TRMU	0.200953811404368	3.31980554256703	3.4721465111795	0.015268411009678	0.240404454826983	-2.98160659817733
O14647	CHD2	0.0992457613986496	3.35078482118639	3.77047674700846	0.0109126244952757	0.213861987921992	-2.98391313224826
P42766	RPL35	-0.272973784163321	3.20505663528476	-3.55595652681539	0.0138741458872246	0.233155021634809	-2.98710883992666
P11940-1	PABPC1	-0.192288484369496	3.13894757083659	-4.14633005752677	0.00728857232301828	0.187715644273291	-2.99486363316225
O43847-2	NRD1; NRDC	0.0725030633573725	3.34216572062312	4.17458404240326	0.00707683849939841	0.1850992544473	-2.99575345886466
Q9Y3D2	MSRB2	0.175252848584881	3.25842080944723	3.28084873257296	0.0190768794850143	0.246605353650512	-2.9961675473347
P63096-1	GNAI1	0.190510653092983	3.32004881699694	3.31254936466119	0.0183784506712331	0.24377063557619	-3.00136991225164
Q9Y2S7	POLDIP2	0.161099016175928	3.34427617309763	3.6095662988938	0.0130573420539416	0.226799620895595	-3.0053258203015
Q7Z4W1	DCXR	0.0836690743311807	3.41327827270566	3.96826081523038	0.00880089416725603	0.200541052855237	-3.00967452037206
Q9NWB6	ARGLU1	-0.151586991386593	3.30145072506796	-3.3906846871221	0.0167754494734179	0.243661001284326	-3.01487694025819
Q9NUL7	DDX28	0.199525543654995	3.23848769080242	3.42452447789962	0.0161301124533257	0.243661001284326	-3.0164643620718
O75886	STAM2	0.110903251195836	3.34910965487097	3.75088722764497	0.0111512256927578	0.214606868770616	-3.02044777537432
Q14678-1	KANK1	0.086681103417705	3.41594561560738	3.83478310308996	0.0101689158593875	0.206302065736636	-3.0215167635115
Q9UGY1	NOL12	-0.143010503256055	3.22479487532784	-3.31181777102078	0.0183942447437407	0.24377063557619	-3.03043756955767
O75879	PET112; GATB	0.17031574073462	3.24090673133299	3.20986630356178	0.0207502950643429	0.256403462173737	-3.0322542192675
Q9NYY8	FASTKD2	0.238519455028781	3.25251172996589	3.64569582371052	0.0125373452718107	0.224056929753292	-3.0334295627811
P51687	SUOX	0.262946100704755	3.35234466184928	3.29079605690287	0.0188545908556642	0.246098174236456	-3.0343095541933
P30084	ECHS1	0.149106201655279	3.27378118395186	3.93901620584131	0.009081834439448	0.201228807158008	-3.03536092398324
O75746	SLC25A12	0.24957501349487	3.22487695998793	3.4253241009888	0.0161152023740891	0.243661001284326	-3.03836828309032
Q9H061-1	TMEM126A	0.287156713847384	3.19302086713191	3.36817960385189	0.017220570484586	0.243661001284326	-3.03859212358144
O15446-2	CD3EAP	-0.0932795352265748	3.32327329066244	-3.89971622047962	0.00947549226189683	0.202847958549269	-3.03876648033881
Q9NPL8	TIMMDC1	0.35840643030984	3.16874441318027	3.40813421750554	0.0164391519360378	0.243661001284326	-3.04218235899085
Q9P015	MRPL15	0.139287911165853	3.32714726615688	3.69427817467409	0.0118744240610699	0.21985219560531	-3.04223581687957
Q6PI48	DARS2	0.151380259304783	3.20314249247279	3.87881110698755	0.00969273198118824	0.204246220619271	-3.05718119999017
P49406	MRPL19	0.199353307132442	3.34453166466867	3.57294342590573	0.0136092863189209	0.23218685948169	-3.05977642700687
Q02338	BDH1	0.201652767114348	3.43998062167586	3.62075716087038	0.0128937311055995	0.225707449197499	-3.06013547162116
Q9ULF5	SLC39A10	0.140324402261763	3.2826201409835	3.30458145595895	0.0185512829475837	0.24377063557619	-3.06361833797675
Q16540	MRPL23	0.316832057865454	3.42488745296371	3.12145290916938	0.023066513769555	0.265048043690511	-3.06661563172558
P42167	TMPO	-0.121748126741197	3.21113189459583	-3.77600810795469	0.010846297995731	0.213648131353569	-3.066994182076
Q13370	PDE3B	0.167487721194119	3.33327780038903	3.32956184192389	0.0180153998271809	0.243661001284326	-3.07166282658603
O60551	NMT2	-0.128140636469554	3.36757465423321	-3.46401428571365	0.0154118433603564	0.240404454826983	-3.07236795757464
Q9BSU1	C16orf70	0.1559538565687	3.28144076501451	3.25690960198819	0.0196238782106721	0.250782717361479	-3.07478940862549
Q5RI15-2	COX20	0.359689868242531	3.29230720975473	3.20650345416812	0.0208335230785049	0.2565825722499	-3.07930704969477
O43678	NDUFA2	0.153226825810335	3.33166046626556	3.34214511302528	0.0177520076293013	0.243661001284326	-3.0876488548899
Q9Y2Z4	YARS2	0.149245918175079	3.16125576848814	3.31975002102718	0.018223801677284	0.24377063557619	-3.08887304711731
Q01415-1	GALK2	0.104434892504142	3.41803074249509	3.64423549166697	0.0125579063421911	0.224056929753292	-3.09118875616221
Q96RQ9-2	IL4I1	0.157589599562552	3.46571914434686	3.48403437245529	0.015061417801878	0.240061884817421	-3.09935813766127
Q8IYB8	SUPV3L1	0.286922879568349	3.28472652979004	3.84204683341786	0.010088566690199	0.206125669579081	-3.10121634961862
Q9UJS0-2	SLC25A13	0.256582458238882	2.5676483499198	3.41582440104029	0.0162933371721424	0.243661001284326	-3.10416920781819
Q9H2W6	MRPL46	0.155470579920386	3.34685914559289	3.54035070809043	0.0141225743180645	0.23382252356165	-3.10856922496986
Q92783	STAM	0.115479104378493	3.31225968461822	3.92702583861704	0.00919994316591279	0.201439797919432	-3.11515954399849
Q16740	CLPP	0.158568760544533	3.3909326453409	3.79589223633973	0.010611594020821	0.211038860970292	-3.11767481726051
P82933	MRPS9	0.25509901114563	3.2914782358663	3.69196210728914	0.0119051174055836	0.21985219560531	-3.12180805751888
O75319-1	DUSP11	-0.164038364421747	3.25766003261226	-3.25208761152449	0.0197361549532261	0.251296546702562	-3.12321612597729
O75521	ECI2	0.129745888817119	3.30110563482924	3.74645346737394	0.0112060414963532	0.214606868770616	-3.12356743929446
Q9HD34	LYRM4	0.194356963958212	3.36025064726563	3.18091242669395	0.0214791458337743	0.259245488340766	-3.15002660299043
Q9NRW7	VPS45	0.119473123565463	3.3460319790552	3.56610992446791	0.01371514639786	0.233155021634809	-3.15055707647979
Q96G28	CCDC104; CFAP36	0.212364024001339	3.10190898950563	3.17109229916094	0.0217327547411744	0.259524320248963	-3.15338906560337
Q8N9N8	EIF1AD	-0.227703845697653	3.33423890298391	-3.37117455056791	0.017160581358207	0.243661001284326	-3.15678747826631
Q9H1K1	ISCU	0.153884026032178	3.36828923141729	3.42657927755819	0.0160918289118722	0.243661001284326	-3.1642823577909
O60306	AQR	-0.0797342751367182	3.30348737765323	-4.03307806191311	0.00821260811545549	0.196604437390748	-3.16496006652956
O60658-1	PDE8A	0.253808022464575	3.44529949959273	3.11134876374555	0.0233489505476141	0.265070049067139	-3.1666792064812
Q9H857-2	NT5DC2	0.204251790979774	2.77406909911167	3.01787441656557	0.0261506941880393	0.274181563386866	-3.17015137699365
P32780	GTF2H1	-0.352631409706123	3.24303836615272	-3.57719780859999	0.0135438433055321	0.231658307124139	-3.17127467197459
P62256	UBE2H	-0.20738712658298	3.38003764681861	-3.30393589015863	0.0185653649697202	0.24377063557619	-3.18576362784256
O95169	NDUFB8	0.385936022995522	3.08822246290522	2.96583197109592	0.0278697128134741	0.283419379019929	-3.18579266948542
Q9Y2S2-1	CRYL1	-0.233683387435132	3.36739721862681	-3.0212574666397	0.0260430574648819	0.274181563386866	-3.18581342487632
O75027-2	ABCB7	0.318022099538082	3.01613030755381	3.23137406895943	0.0202266391003726	0.25366318662818	-3.18851532426097
Q9NQX7	ITM2C	0.127493116327857	3.35197983367597	3.40542744123936	0.016490821767756	0.243661001284326	-3.20104919586582
Q8N4T8	CBR4	0.186988161942906	3.43418031600527	3.33809564841398	0.0178362996512656	0.243661001284326	-3.20930533681207
Q9BSH5	HDHD3	0.204990500926231	3.4169377976831	3.31226033361075	0.0183846886383986	0.24377063557619	-3.21325808669498
Q9NZ45	CISD1	0.221847367351318	3.2908234143324	3.76633042557927	0.0109626428659543	0.214167726657699	-3.21750348782928
Q96BJ3-1	AIDA	0.114444408827891	3.33611475539055	3.59959967713179	0.0132050190600122	0.228185445042165	-3.22121600851437
P56182	RRP1	-0.0771119702857381	3.32309721649206	-3.8329531580489	0.0101892719167752	0.206302065736636	-3.22416497363455
O75616-1	ERAL1	0.25801131119556	3.25348035319048	3.40810514123779	0.016439706013531	0.243661001284326	-3.22670368268524
P13984	GTF2F2	0.19389487421167	3.27610862637406	3.74791472364358	0.0111879421110257	0.214606868770616	-3.22866350377114
Q6P4A7-1	SFXN4	0.263919324461339	3.19762948183072	3.00607650038275	0.0265299123088368	0.275206898981483	-3.23527585401528
Q99797	MIPEP	0.205551623322655	3.18206908166739	3.3124683229245	0.0183801995040307	0.24377063557619	-3.23543951775202
Q8TD30-1	GPT2	0.196749057082083	2.87676394190147	2.94266012593879	0.0286747545440699	0.286406686545673	-3.23840753134814
Q9UJZ1	STOML2	0.182921883867721	3.33866247545913	3.65343662467633	0.0124289868161004	0.223393367776734	-3.24342328098334
Q9BUE6-2	ISCA1	0.204116582752884	3.32506514966143	3.28385020746604	0.0190095012567144	0.246605353650512	-3.25066299054816
Q8IYQ7	THNSL1	0.192994470223141	3.33136742176054	3.40822392178062	0.0164374426623434	0.243661001284326	-3.25399376850719
Q14974	KPNB1	0.0513097431698173	3.27204400705281	4.22686328530338	0.00670323270557802	0.183167196125591	-3.25473493340996
Q8WUD4	CCDC12	-0.11497361037569	3.29768990118538	-3.37544261445139	0.0170754938796155	0.243661001284326	-3.25584382193937
P12235	SLC25A4	0.269476293223427	3.28870941810207	3.38120586807071	0.0169613443163314	0.243661001284326	-3.25874751739092
Q17RS7	GEN1	0.176618524780087	3.30880080625089	3.09395355187924	0.0238441889357148	0.265070049067139	-3.26146817106383
Q9NYL4	FKBP11	0.144922786406428	3.36006661040786	3.46186662543013	0.0154499738895056	0.240404454826983	-3.26827389370409
Q9NQH7-1	XPNPEP3	0.132276953785843	3.32094315054013	3.33473760139255	0.0179065376863208	0.243661001284326	-3.268961683973
P56385	ATP5I	0.180426868665795	3.12651317673755	3.40703559504075	0.016460101788068	0.243661001284326	-3.27014150620931
Q9HAV7	GRPEL1	0.148051912035733	3.34512250100291	3.64305339401146	0.0125745777050393	0.224056929753292	-3.27745140640089
Q9UII2-1	ATPIF1	0.343938132093323	3.40025668899431	3.35719343584546	0.0174426353206244	0.243661001284326	-3.28544533786067
Q7L2E3-2	DHX30	0.066459036034847	3.21431690426378	3.88207936030728	0.00965840103798542	0.204246220619271	-3.28559563420449
O43399-7	TPD52L2	-0.167621424923961	3.36311850632766	-3.35368728803095	0.0175141761417553	0.243661001284326	-3.28841540176724
P18206	VCL	0.0769571357705763	2.93365786431695	4.0030343042483	0.00847956169663477	0.198745046140637	-3.29000253664234
P35573-1	AGL	0.0831674547365941	2.92956092719641	3.62408363644456	0.0128455427314053	0.225451013682784	-3.29504052904041
Q99583	MNT	-0.208596881954743	3.32933134685318	-3.04235237016675	0.0253828024031342	0.271261045713622	-3.295556566695
Q9Y3B7-1	MRPL11	0.1462697840179	3.35815560868838	3.46338943650653	0.0154229263482133	0.240404454826983	-3.30162986999517
O60308	CEP104	-0.238172784045035	3.31673959224516	-2.83215597583959	0.0328812351250913	0.300494319433353	-3.30302509426567
Q7L3T8	PARS2	0.162102663479758	3.34037902502899	3.00769206835852	0.0264776275211851	0.275089045127366	-3.30869785135545
Q9NXD2	MTMR10	0.0959557864084592	3.40136447946145	3.3764819266968	0.0170548456214296	0.243661001284326	-3.31049824806938
Q92485-1	SMPDL3B	0.184460783732631	3.25727136708638	3.15060268320038	0.0222726565764518	0.259924995671717	-3.31169951095696
Q5JTZ9	AARS2	0.248664098074793	3.25181812996375	3.34505842002549	0.0176916399358475	0.243661001284326	-3.31889976864026
Q8N5U6-2	RNF10	-0.140949022598574	3.31635757912697	-3.09355754658578	0.0238555974119411	0.265070049067139	-3.31932390838615
Q7Z2T5-1	TRMT1L	0.0720161184799298	3.26821236776523	3.70348662291535	0.0117532682038206	0.218830316165078	-3.32222949379053
P09001	MRPL3	0.166996395209075	3.31341477805604	3.35942909764548	0.0173971881049745	0.243661001284326	-3.32357112772842
Q96H35	RBM18	-0.161091341850655	3.31314627039789	-2.96740389854646	0.0278160067073169	0.283301813767552	-3.32948989993186
P60953	CDC42	0.0952379045369465	3.35504350067569	3.72655606917851	0.0114558055293504	0.216221133900276	-3.33180022984191
Q9UL25	RAB21	0.0926342010413797	3.37479876109348	3.39699487604797	0.0166529573948995	0.243661001284326	-3.33961819561245
Q9NYK6-1	C21orf91	0.220681902486928	3.37995518276005	2.89862799156075	0.0302757738800205	0.293810973413539	-3.34456203911317
O14548	COX7A2L	0.231998967110736	3.19432591914963	3.15178324732296	0.0222411486763264	0.259924995671717	-3.3457284851229
Q96IZ0	PAWR	0.108717819012019	3.22826094527221	3.49379655440108	0.0148937839019622	0.239511998538254	-3.34613865497877
Q9H582-1	ZNF644	-0.145250994892134	3.26997128192529	-3.18081433778414	0.0214816627500456	0.259245488340766	-3.34823248026144
P16219	ACADS	0.184010314974914	3.31989581582026	3.29767756045975	0.018702499116647	0.24499941353367	-3.35245209321475
Q9UGK8	SERGEF	0.159830982552884	3.40155516166618	3.34045452554623	0.0177871441284557	0.243661001284326	-3.35250090718902
P50053-2	KHK	-0.105200859955325	3.37943278073459	-3.227404770765	0.020322166708117	0.253863680351525	-3.36359362732083
Q9HC36	RNMTL1; MRM3	0.204169449650688	3.23977804928851	3.13966331141436	0.0225669771857272	0.261995199727907	-3.3661021411077
Q9BSE5	AGMAT	0.213904059579115	3.41722338771232	3.25197206952625	0.0197388540105553	0.251296546702562	-3.36783000992401
P40189-1	IL6ST	0.195724269835936	3.36323299260594	3.04382164268503	0.0253375071709844	0.271261045713622	-3.37227063576439
Q8N999-1	C12orf29	-0.165406665628811	3.30691257636704	-3.34898628326007	0.0176106110744704	0.243661001284326	-3.37230335747821
Q9NRZ7-3	AGPAT3	0.137284472060496	3.31113921563472	3.35549656329458	0.017477218217587	0.243661001284326	-3.3748680724114
O95900	TRUB2	0.174112288499245	3.28911762822981	3.21380848079917	0.0206531984016163	0.25628951592393	-3.37776478497275
Q00987-11	MDM2	-0.222153167262438	3.31869973278636	-2.92197817138088	0.0294148848489598	0.289074350810976	-3.3817595230961
P53992	SEC24C	0.0458258119067912	3.38364936079604	4.03618263147374	0.00818556971570243	0.196604437390748	-3.38789499960326
P49748-3	ACADVL	0.193073877631291	3.39174074293641	3.93069519953985	0.00916361534067823	0.201300072941304	-3.39513350534975
O75351	VPS4B	-0.0694896523799619	3.39989046233008	-3.85887279191102	0.00990518195751002	0.205770540305086	-3.39573592456927
Q8NEZ2	VPS37A	0.178064037200323	3.37888739150192	3.12171625444646	0.0230592032755435	0.265048043690511	-3.39765994404424
P82932	MRPS6	0.164469084924111	3.32718471095201	3.09074993545588	0.0239366547025804	0.265070049067139	-3.40088712430883
Q9BYG3	MKI67IP; NIFK	-0.189421278032294	3.32040936613357	-3.45506600188893	0.0155714128928278	0.240847975224922	-3.40355698299107
Q8NI77	KIF18A	-0.115656330780293	3.29316514587272	-3.15605118094552	0.0221276533848942	0.259924995671717	-3.40512392862217
Q9Y624	F11R	0.0966494677392339	3.40062944465451	3.37370569504369	0.0171100639304812	0.243661001284326	-3.40523377551776
Q93073-1	SECISBP2L	-0.0942149235009049	3.41026937635772	-3.38233069980846	0.016939164828009	0.243661001284326	-3.40859125267711
P68104	EEF1A1	-0.0691362552414512	3.3761746393038	-4.54694806090255	0.00485084533982569	0.16254842716353	-3.40944855787791
Q9BVS5	TRMT61B	0.201277542282846	3.33688769659925	2.90877612750845	0.0298982795181392	0.292158344032497	-3.41136587018815
Q9BQ70	TCF25	-0.0777903955612452	3.27997988193676	-3.45153657454451	0.015634858438069	0.241049354175917	-3.41205983023443
Q12849	GRSF1	0.136871689620359	3.22897130122073	3.61802639564321	0.0129334416142813	0.225814531249867	-3.41304790041702
Q96GC5-1	MRPL48	0.223705306582953	3.34088614138506	3.17240554871901	0.0216986481498477	0.259524320248963	-3.41313343114064
Q14393-2	GAS6	0.0728435504756404	3.46268493455138	3.51862691071658	0.014476736772319	0.235623788337841	-3.4181714675136
Q13131-2	PRKAA1	0.17701434088891	3.36751503991627	3.13623379011179	0.0226601315908985	0.262171092175593	-3.41869047750728
Q3ZCQ8-2	TIMM50	0.294666311929062	3.13052709913163	3.31964742577256	0.0182259949222313	0.24377063557619	-3.41961918876631
Q9UBX3-2	SLC25A10	0.207993159759051	3.14278173090713	2.92721422613306	0.029225544897125	0.288391393019451	-3.4213896060254
Q9Y291	MRPS33	0.214034178311439	3.26296238940937	2.99115544435117	0.0270182104523527	0.277288738922966	-3.4219569642643
Q9Y2R9	MRPS7	0.168690606071894	3.32816900218859	3.35409783952254	0.0175057822037704	0.243661001284326	-3.42319943145745
Q5T440	IBA57	0.13169060506984	3.32523189985768	3.09054066619142	0.023942708592681	0.265070049067139	-3.42753912991562
P13073	COX4I1	0.337515797494361	3.07192377833135	3.21178611392771	0.0207029466150988	0.25628951592393	-3.43459430011285
Q8TBZ6	TRMT10A	-0.171813178529488	3.26778850084999	-2.93728128729012	0.0288652568649069	0.287689039608765	-3.43723583520548
Q9H6S0	YTHDC2	-0.0615246203703057	3.3077106728678	-3.65922367029073	0.0123486653113813	0.223393367776734	-3.43833127489673
Q6PI26	SHQ1	-0.155717641200388	3.20243917520392	-2.96113241760897	0.0280309572890219	0.28392021944976	-3.45356582002133
O95182	NDUFA7	0.224882655621494	3.35120791122027	3.08439853136682	0.0241211479285084	0.265653399095192	-3.45360056446711
Q9P032	NDUFAF4	0.286032578410294	3.35642887333199	3.13775965507601	0.022618632836726	0.26214215504909	-3.45395032483821
Q8WZ60	KLHL6	-0.200770513241402	3.40851877885104	-3.16272895009507	0.0219513587476382	0.259697825878857	-3.45488185977304
Q567U6	CCDC93	-0.101125998948529	3.33357949814349	-3.51991827968645	0.0144554076387431	0.235623788337841	-3.46621836431262
A4D1E9-1	GTPBP10	0.166420362564008	3.30452148429958	3.33083330975862	0.0179885888073577	0.243661001284326	-3.46637400550223
O75947-1	ATP5H	0.2777484003808	3.15889322238718	3.3335602483956	0.0179312365058391	0.243661001284326	-3.4678434849321
Q9Y5L4	TIMM13	-0.10236081966011	3.36587696897149	-3.54205272934704	0.0140952391010492	0.23382252356165	-3.46884376831341
Q8NI60-1	ADCK3; COQ8A	0.178086535278627	3.31445495793997	3.31427679426599	0.0183412177798289	0.24377063557619	-3.47405677617472
Q4G176	ACSF3	0.141921885591879	3.3385724698103	2.87256701837939	0.0312693326908512	0.296045710349158	-3.4835406507666
Q92622-1	KIAA0226; RUBCN	0.116526120276365	3.40044573579694	3.04322231730741	0.0253559726088203	0.271261045713622	-3.49190023326952
Q6UXV4	APOOL	0.325915556469759	3.25554133796728	3.09785994376017	0.0237319724638991	0.265070049067139	-3.49792302007368
Q9BZE4	GTPBP4	-0.097716473596748	3.26053610393517	-3.67857262495331	0.0120843187977205	0.221337305063426	-3.4983927595232
Q8N183	NDUFAF2	0.126040411249012	3.33316803773821	3.30399952163554	0.0185639764188445	0.24377063557619	-3.49841022690658
Q9H3Q1	CDC42EP4	0.625513524311374	2.21822799207563	2.59029309286911	0.0446335754704002	0.345043098497049	-3.49931092711238
Q00325-1	SLC25A3	0.347579462111034	3.15364280718451	3.46499075845239	0.0153945414362689	0.240404454826983	-3.49947426705216
Q6YN16	HSDL2	0.194557575578906	3.31053479069408	3.47600967169932	0.015200798031531	0.240404454826983	-3.5008189506398
P04179	SOD2	0.163790761585464	3.35191339949866	3.21286033824038	0.0206765052325578	0.25628951592393	-3.51452746882694
Q8TAA5	GRPEL2	0.25399642529003	3.16112249846182	2.61637395778509	0.0431705248760831	0.34220786346348	-3.5189666591835
Q9NVI7	ATAD3A	0.171808529624822	3.23364612221575	3.26952255229617	0.0193335360477213	0.248991104520538	-3.52836996785747
O00472	ELL2	0.159916989240851	3.35793700128712	2.76002723572136	0.0359883693406943	0.31376630182639	-3.53022641927488
P09132-1	SRP19	-0.167496499172854	3.27545192875375	-3.18842586339767	0.0212873223144457	0.258264165496019	-3.53366480367841
O15091	KIAA0391	0.201218615811064	3.12355348702005	2.89632501023922	0.0303621661246054	0.293876711195934	-3.53541164270947
Q96CT7	CCDC124	-0.143596186529084	3.29751712132135	-3.33712422808797	0.0178565866004839	0.243661001284326	-3.53724640492503
P06576	ATP5B	0.170266219832138	3.40138859817525	4.29329570638221	0.00626042510775241	0.179620923486501	-3.53958984460132
Q15459	SF3A1	-0.0643213719608721	3.28591372392413	-3.93131123121742	0.00915753235548228	0.201300072941304	-3.54013861728533
P17676	CEBPB	-0.300482731612421	3.13603053594226	-2.57685652966878	0.0454081069275723	0.345043098497049	-3.54183997336962
Q70EK8	USP53	0.134508350600564	3.33618775419369	2.84550971368385	0.0323387569511763	0.299423036123701	-3.54439265966743
Q96S59-1	RANBP9	0.105232259528073	3.34194653420011	3.23969433711021	0.0200280118469723	0.252112913174808	-3.54626998659559
Q9Y3D3	MRPS16	0.165978029476395	3.30980292788987	2.89341030541116	0.030471893439983	0.293876711195934	-3.54648582144803
Q13472-1	TOP3A	0.105694030122434	3.22960929845971	3.17326732759337	0.0216762989924867	0.259524320248963	-3.54913456361443
Q9Y266	NUDC	-0.0808635649867082	3.29825616697872	-4.09197610048627	0.00771645396949731	0.194269676340678	-3.55134805627377
Q8N4A0	GALNT4; POC1B-GALNT4	0.186754739901412	3.39918750227056	2.73593875846552	0.0370961412810569	0.316849125401861	-3.55225311590519
Q9NVH1-1	DNAJC11	0.141875552317659	3.23121633487657	2.93271157931891	0.0290281936636932	0.287689039608765	-3.55555068313855
A6NJ78	METTL15	0.745529221959779	3.37891580591447	2.72118525735021	0.037792883653961	0.32076232818425	-3.57263237308076
P62070-4	RRAS2	0.132493954119091	3.22071562085076	3.09376521674571	0.023849613911762	0.265070049067139	-3.57303659534666
O95714	HERC2	0.0971334006102883	3.23597659631722	3.41121721450473	0.016380520475442	0.243661001284326	-3.57528117300933
Q5VV67-1	PPRC1	-0.26230167780377	3.34102469258172	-2.56120218490136	0.0463287752991549	0.348893571904274	-3.57643231461856
Q96GW9	MARS2	0.216144797450458	3.31727075226242	3.18875998272367	0.021278836210782	0.258264165496019	-3.57674000005469
Q14849-1	STARD3	0.144430603621126	3.34737709483271	2.88197425696618	0.0309066296093927	0.295427620180895	-3.57751942803522
Q03135	CAV1	0.122102239642757	3.39101986930691	3.02035165632083	0.0260718292460041	0.274181563386866	-3.57824412787978
P09669	COX6C	0.270109085524269	3.10337761920494	3.04584627840368	0.0252752369334665	0.271261045713622	-3.57855812182576
Q9BRG1	VPS25	0.259853125610105	3.39688542683981	3.17662566774105	0.0215894476597454	0.259524320248963	-3.57914697526237
P38646	HSPA9	0.166783864888624	3.30825159021939	4.13436108687315	0.00738043023611764	0.187921409269632	-3.58754502024639
Q9UDX5	MTFP1	0.335580643445164	3.14903266755866	2.69085901417162	0.0392700847538269	0.326275047352658	-3.59090492926169
P21127-1	CDK11B	-0.0581932999098552	3.32714318107977	-3.58974402017502	0.0133528980571317	0.229560564552531	-3.59407496003627
Q9P1W9	PIM2	-0.181672966172177	3.39187196579199	-2.75366594697448	0.0362773710834759	0.314040189158639	-3.59575313496003
P49773	HINT1	-0.23261505499463	3.3121624444803	-3.62909981391932	0.0127732588631373	0.225451013682784	-3.59689687535547
O43488	AKR7A2	-0.0856032250513855	3.35447635014082	-3.24083620395851	0.0200009218199514	0.252112913174808	-3.59779161495584
Q9BYD2	MRPL9	0.147227469236753	3.33715383925451	3.14224298148584	0.0224971860984548	0.261636825179608	-3.60098141588575
Q9UMS0	NFU1	0.193782382083426	3.3317041948841	2.89824181807976	0.0302902416803901	0.293810973413539	-3.60532936042827
P78346-2	RPP30	0.0924455812999741	3.2976594590127	3.17654754917066	0.0215914635289991	0.259524320248963	-3.6073189047414
Q9Y274-1	ST3GAL6	0.190389002241639	3.38389181119691	2.79795504735389	0.0343164456099842	0.306181616988054	-3.60890624615407
Q96G21	IMP4	-0.127643516893278	3.31709594830487	-2.92658519079007	0.0292482205152148	0.288391393019451	-3.60978969390737
Q16649	NFIL3	-0.0952347391067594	3.37568399514315	-3.22600704513635	0.0203559243840333	0.253863680351525	-3.61180104720427
P34059	GALNS	0.20249563176704	3.20007340705736	2.7111727421754	0.0382738186168496	0.323618375776683	-3.62312421801181
Q9UDY2	TJP2	0.0793015258227329	3.2322472417794	3.53229505402995	0.0142527603470035	0.234821213364111	-3.62375979295689
Q9H7Z7	PTGES2	0.089240688013153	3.40226971436515	3.36172659448821	0.0173506213846176	0.243661001284326	-3.62428659313089
Q99574	SERPINI1	0.182919185433734	3.30341478303441	2.69063861175157	0.0392810471850182	0.326275047352658	-3.62510335937565
Q07817-1	BCL2L1	-0.0898840004189752	3.41295359605827	-3.10801595405485	0.0234429478514721	0.265070049067139	-3.62865277724865
Q8TEQ8-1	PIGO	0.138149475516441	3.30130306812164	2.79886679972779	0.0342773101069726	0.306181616988054	-3.63065018506256
Q13247	SRSF6	-0.141137530541888	3.27516736377759	-3.33228205457219	0.0179580937634766	0.243661001284326	-3.63101456675021
Q04656-3	ATP7A	0.0850316482591724	3.3709031866365	3.35293750530963	0.0175295174187735	0.243661001284326	-3.6324028460286
P30837	ALDH1B1	0.220656012429084	3.17238757703821	3.36393555795634	0.0173059801054326	0.243661001284326	-3.63603680271132
P13804-1	ETFA	0.178336365530281	2.01596568259417	3.09053606410227	0.0239428417441893	0.265070049067139	-3.63620955439446
Q9NYK1	TLR7	0.109642387589458	3.3701347678329	2.92627013567092	0.0292595849507982	0.288391393019451	-3.63894586013276
Q6IA69	NADSYN1	-0.090388957184966	3.36111615419973	-3.12441831080503	0.0229843417152057	0.26500985421889	-3.64309942311262
P00973-3	OAS1	0.181611895855124	3.40721576368978	2.61687434984357	0.0431429654143186	0.34220786346348	-3.64475207314463
P43304	GPD2	0.149380610556748	2.96972498914759	2.94958832272891	0.0284314093185538	0.285887837515277	-3.64647840840516
Q9NRF8	CTPS2	0.166239351561667	3.19199658526278	3.10215868823553	0.0236091589279555	0.265070049067139	-3.6534329676579
P58546	LUZP6; MTPN	-0.228903115695416	3.42271625857085	-3.20005259546371	0.0209942153765977	0.257255654612402	-3.6559168274885
Q5VTE6-1	ANGEL2	0.154887735837325	3.38309278412771	3.04099552451708	0.0254247109840015	0.271277630530886	-3.65832171076657
Q969S9	GFM2	0.129529116778855	3.29205629832099	2.97966029069418	0.0274011373386299	0.279924688739012	-3.66140130560344
Q9Y3A2	UTP11L; UTP11	-0.106357855981804	3.27241635736735	-3.20450123710145	0.0208832522779844	0.256631118487406	-3.66332600234474
Q86TS9-1	MRPL52	0.215728708704939	3.37049437821723	2.7947952451251	0.034452452403821	0.306181616988054	-3.66560325500823
Q9BRS2	RIOK1	-0.166281676002971	3.20144537099763	-2.93417642459244	0.0289758537341163	0.287689039608765	-3.6663290233288
Q7L0Y3	TRMT10C	0.161524671536215	3.28072833208425	3.52607059065064	0.0143542740255318	0.235623788337841	-3.66823472586925
P54920	NAPA	-0.180170000450448	3.34666969194836	-3.54640167577366	0.0140256620517685	0.23382252356165	-3.67366937817042
Q9BT17-1	MTG1	0.166292635227102	3.30465478541642	3.01179293392574	0.0263454194375661	0.274564200712123	-3.67570236308186
Q99570	PIK3R4	0.0530872051066602	3.3571724481271	3.4958943361252	0.0148580344975755	0.239511998538254	-3.67591859047368
Q9Y2J2	EPB41L3	0.184087790024471	1.93326540427502	2.850723609444	0.0321296100540388	0.299423036123701	-3.67612425845549
Q9Y5Z9-1	UBIAD1	-0.178327981327531	3.35949026578432	-2.76752248969782	0.0356510606870935	0.312446453635779	-3.67668856492228
P32119	PRDX2	-0.0837862356267832	3.34449313716083	-3.34546384628293	0.0176832570980456	0.243661001284326	-3.67684453105207
O14526-1	FCHO1	-0.158290984309845	3.38673726145397	-2.72377308996877	0.03766965104302	0.320525815583773	-3.67905419345089
Q04837	SSBP1	0.211877472167478	3.38192604537683	3.47765709195744	0.015172066838322	0.240404454826983	-3.68556951755547
P19440	GGT1	0.422679090091097	3.44101212876161	3.02386728767349	0.0259603555373463	0.274181563386866	-3.68987545563615
Q96CM8-2	ACSF2	0.243121793714929	3.25888114423826	3.08352254353595	0.0241467162819343	0.265653399095192	-3.69155730082211
P22570-3	FDXR	0.0986903763144776	3.24619376655385	3.10170559199631	0.0236220705553161	0.265070049067139	-3.69584765974907
O95926	SYF2	-0.13220024109096	3.32648186288646	-3.05120432259655	0.025111256049435	0.271259015713296	-3.69624291659248
Q86WQ0-2	NR2C2AP	0.187714758250517	3.38247181198605	2.68811591671283	0.0394067581648034	0.326275047352658	-3.69676121191932
Q13283	G3BP1	-0.0766247366130344	3.30570329842179	-3.73479722441784	0.0113516046922802	0.215702792209718	-3.69862341967044
Q9NVS2-2	MRPS18A	0.324666532072756	3.27007375246917	2.39563044273518	0.0573897598933331	0.379698785436009	-3.70550079149869
Q9NP64	ZCCHC17	-0.107134315718397	3.2563030030519	-2.9086605426649	0.0299025499396546	0.292158344032497	-3.70863611605923
O95168-1	NDUFB4	0.175358181465123	3.25619292272901	2.60596036273869	0.0437483943108592	0.343800486350461	-3.71186010499059
Q9Y5L0-1	TNPO3	0.122036054938848	3.37179183055084	3.42980570845677	0.0160319210425635	0.243661001284326	-3.71365277864725
Q38SD2	LRRK1	0.104483062672466	3.36340037538135	3.05863704475642	0.0248857196598557	0.270521032583449	-3.71465273099649
Q9NX40	OCIAD1	0.179898419244006	3.24201997710413	3.01715578920095	0.0261736214048594	0.274181563386866	-3.71897720497787
Q9Y606	PUS1	0.0796157145784086	3.26263070249029	3.160069317723	0.0220213866038305	0.259697825878857	-3.7225961946071
Q8WVX9	FAR1	0.152506290874924	3.17491367892797	2.99043805284021	0.0270419352514488	0.277288738922966	-3.72523232085053
Q5M775-1	SPECC1	-0.0922694105073579	3.36381166934347	-3.34651701279276	0.0176615018680335	0.243661001284326	-3.72607623523265
P55809	OXCT1	0.156549589584276	3.39179876522912	3.54890767372343	0.0139857444793605	0.23382252356165	-3.72762595411158
Q8NBA8	DTWD2	0.150340656526205	3.29746088600406	2.64952425793198	0.0413851722267965	0.335140074424323	-3.72859493020785
Q13277-1	STX3	0.183356584598985	3.32503674855218	2.62211013216981	0.042855737130522	0.341322588852333	-3.73161839138742
Q9Y6H1	CHCHD2	-0.27810676282395	3.16444653290691	-2.4959876473849	0.0503857664071867	0.354928140129403	-3.73407907940774
P09622	DLD	0.137245601480992	3.34647959958457	3.6244381561173	0.0128404189872064	0.225451013682784	-3.73923776050362
Q96BD8	SKA1	-0.157428157272322	3.27237819928815	-2.81739212562612	0.0334925895377817	0.304651132439741	-3.7423521607042
Q96BK5	PINX1	-0.0970637019629411	3.37003255583567	-2.92421419907291	0.0293338642047967	0.288700197927736	-3.74359602851022
Q5BJF6	ODF2	-0.0995449577904476	3.2830910298189	-3.05441677903745	0.0250135027753914	0.271026366475498	-3.74566787965981
Q8IUR0	TRAPPC5	-0.119657780168688	3.39100888389568	-2.8097218746471	0.0338150936205988	0.306181616988054	-3.74612647132753
Q02818	NUCB1	0.125733809667158	3.39242924618977	3.37730527969401	0.0170385076467495	0.243661001284326	-3.74812642576338
Q6PKC3-1	TXNDC11	-0.116413018394952	3.38937064227834	-3.11889188451167	0.023137741890873	0.265070049067139	-3.74833861111713
O94888	UBXN7	0.144720927505826	3.33096532871452	3.33438329606562	0.0179139664076268	0.243661001284326	-3.75061242166748
Q5JSJ4	DDX26B; INTS6L	-0.105601579028788	3.31254453809021	-2.8372913710901	0.0326714489779739	0.300488223068849	-3.7538786089151
Q9NVW2	RLIM	0.159719288887394	3.22662695932569	2.62668786202733	0.0426063001405402	0.340356790453064	-3.75679403430617
O43164	PJA2	0.112269582203853	3.2487224970984	2.8583338456354	0.0318269870457377	0.2983835521917	-3.75749856877303
Q96HR3	MED30	-0.191563282219643	3.2923765603515	-2.46063478197939	0.0527428499459526	0.363255571041694	-3.76279202926083
Q8N9F7	GDPD1	0.162920497829686	2.88804270572175	2.78406261252894	0.0349188196203399	0.308441925739717	-3.76844186202873
Q8N0X4	CLYBL	0.168850918746488	3.41512009067624	3.16454316941123	0.0219037320264604	0.259697825878857	-3.77525691925291
Q8NDF8-5	PAPD5	-0.140298823244715	3.24020410439365	-2.66420832850408	0.0406199959484546	0.332729052828131	-3.77696010901456
Q9Y375	NDUFAF1	0.298429416879937	3.34643011491552	3.00873907069574	0.0264438038540555	0.275089045127366	-3.77724470479319
P49336	CDK8	-0.345627789726166	3.27180581938831	-2.66733590031065	0.0404590063059131	0.332070134784308	-3.77884467874517
Q6NXE6-1	ARMC6	-0.0758351806231365	3.32113405204173	-3.22655565285727	0.0203426670712729	0.253863680351525	-3.78581529119205
O75153	CLUH; KIAA0664	-0.0677233060896172	3.21997665880629	-3.55822682681943	0.0138384149732346	0.233155021634809	-3.78675156509898
Q9Y4W6	AFG3L2	0.252818821791828	3.19935049178496	3.43517337328741	0.0159328063938365	0.243661001284326	-3.79714988760635
P51858	HDGF	-0.0713103120788458	3.34089666097373	-3.66409382450381	0.0122815218703691	0.223393367776734	-3.79746880966962
Q9BV79	MECR	0.137911351006349	3.38097605218067	2.8001070334081	0.0342241531620396	0.306181616988054	-3.79787136068655
Q14444-1	CAPRIN1	-0.0869719109962994	3.28895592510521	-3.64129289802524	0.0125994524615806	0.224056929753292	-3.7987248406691
P62263	RPS14	-0.130757282090449	3.31120313239395	-3.40827787562184	0.0164364146922882	0.243661001284326	-3.79913923811765
P78417	GSTO1	0.0665220620121303	3.40013541933123	3.39252272109197	0.0167396664639418	0.243661001284326	-3.80278935336474
P01591	IGJ; JCHAIN	-0.109081069011638	3.43080768984306	-3.26781508885398	0.0193725599024459	0.248991104520538	-3.80397538222785
Q9BQ61	C19orf43; TRIR	-0.107258173162987	3.33137826240529	-3.08593289758044	0.0240764348176966	0.265653399095192	-3.80800639802573
Q15814	TBCC	-0.100932835985277	3.33575239094759	-2.96421201897578	0.0279251789520937	0.283554460598148	-3.80835242226451
O43805	SSNA1	-0.141171029798597	3.43295319751651	-2.56224659810766	0.0462667297430794	0.348893571904274	-3.80946957838252
O43766-1	LIAS	0.205402110644572	3.34694963594608	2.51124013423466	0.0494038934844236	0.354714677162342	-3.81357554449261
Q96J01	THOC3	-0.128677035221766	3.21728023790201	-3.24531965902594	0.0198949477249964	0.251668342016868	-3.81403218209128
P19404	NDUFV2	0.103865301558444	3.35550752793588	3.03691872920829	0.0255510895309644	0.271334002886482	-3.81472887361962
Q13825	AUH	0.111425769027456	3.39072524457559	2.87132705493112	0.0313174868161974	0.296084594062558	-3.81618994598524
Q9P0K8	FOXJ2	0.271442423842469	3.36132346011494	2.37862199158767	0.0586762851283467	0.382743317388054	-3.81678656491263
Q8NEJ9	NGDN	0.142746381662267	3.28491564248783	2.99948022796163	0.0267445703236382	0.276760807364894	-3.81731739727316
Q5SRD1	TIMM23B; LINC00843; LOC100652748	0.157160592447157	3.11368440716834	2.58274797035537	0.0450667354963061	0.345043098497049	-3.81819673798048
Q3B7T1	C10orf137; EDRF1	-0.0915268590805815	3.2225371947162	-3.01265743287979	0.0263176416436818	0.274564200712123	-3.82241733443427
Q12851	MAP4K2	-0.123562275681668	3.39071187731978	-2.93416591759661	0.0289762287874174	0.287689039608765	-3.82552267215697
P51575	P2RX1	0.209328372008432	3.46465510333193	2.37308227449635	0.0591018994859211	0.384219505168628	-3.82743291147715
Q15528-1	MED22	-0.172767330475899	3.28505282379301	-2.54518952289298	0.0472913275340194	0.349581915327794	-3.83067122447763
O43674-1	NDUFB5	0.337793111831959	3.21133357491734	2.8783099198059	0.0310473605133586	0.295427620180895	-3.83714333405167
Q14207	NPAT	-0.103935545269779	3.37379259742254	-3.03875270479782	0.0254941517667549	0.271334002886482	-3.83967637713401
Q16763	UBE2S	-0.113729629797662	3.21607462296105	-3.05779639771908	0.0249111156157624	0.270521032583449	-3.84127626098442
O95248-4	SBF1	0.143557150412508	3.34139233872083	3.33656580536316	0.0178682602251407	0.243661001284326	-3.84572411047269
P28161	GSTM2	0.0900985598236315	3.34684903428035	3.10631347942286	0.0234911251214862	0.265070049067139	-3.84711935274404
O94964-2	SOGA1	-0.126120718057148	3.21033556308142	-2.5872305993087	0.0448088477419471	0.345043098497049	-3.85008219192332
Q9BW66-3	CINP	-0.117509366449628	3.40036620848633	-2.62804242309178	0.0425327920949722	0.340356790453064	-3.85063416644382
P10109	FDX1	0.23602614288154	3.28113316829456	2.46864881642771	0.0521983785888548	0.362275997082615	-3.85385968016457
Q9BVV7	TIMM21	0.272842901695465	3.22699648868149	2.43149636982095	0.0547742011792614	0.371743599673863	-3.85424659327051
O75663	TIPRL	0.0713776638539579	3.36106319991153	3.23477880302773	0.02014509573678	0.253112772976888	-3.85875836508638
O95619	YEATS4	-0.0947707702538611	3.2983523143032	-2.88582186885468	0.0307596110580171	0.29513264312345	-3.86192551330227
Q9Y2C4	EXOG	0.254570043819102	3.12491556067933	2.60060465609047	0.0440488369913677	0.344298002623225	-3.86196155518973
Q9Y450-2	HBS1L	-0.176452129980702	3.29318137653186	-2.59622668540067	0.0442960838040986	0.344627633485128	-3.86406190946634
Q6UB28	METAP1D	0.23124329350916	3.32546793447184	2.39014427343718	0.0578014279254414	0.380664306792202	-3.86865423630638
Q7L592	NDUFAF7	0.188428218512961	3.32006444813558	2.85715506544746	0.0318736568921094	0.298404904775431	-3.88141299732078
Q13948	CUX1	0.137467095791428	3.32493606749189	2.67622297662296	0.0400053084954547	0.328747779592233	-3.8821379067793
Q8N4S0	CCDC82	-0.256427404956075	3.26879322053778	-2.33141080352935	0.0624104111708849	0.395030869953567	-3.88522528398172
P62258-1	YWHAE	-0.0752352516579081	3.29856097523252	-3.9154297383639	0.00931582344531669	0.202003113546512	-3.88937443408533
Q9H9H4	VPS37B	-0.106472935523428	3.40420324750984	-3.08941185859619	0.0239753927153854	0.265070049067139	-3.89024722938877
Q13423	NNT	0.355120764497108	3.26395726651486	3.50824528064687	0.0146494933553356	0.237859648151125	-3.89130632295909
Q9Y399	MRPS2	0.106634606800907	3.27603918138549	2.83166203597679	0.0329014904943392	0.300494319433353	-3.89685465226777
Q9Y230	RUVBL2	-0.122383630838488	3.31422080004061	-3.66288381305481	0.0122981655508111	0.223393367776734	-3.90085856396812
P53985	SLC16A1	0.205207773483943	3.14088831749454	2.73635909848626	0.0370764960545326	0.316849125401861	-3.90435453317859
P05387	RPLP2	-0.0893272696398699	3.32743032079849	-3.49543970674883	0.0148657739164524	0.239511998538254	-3.91216961069953
Q8TB36	GDAP1	0.232848607498638	3.03937953829467	2.202425683925	0.0739499241157438	0.424864435817119	-3.91358537316258
O96008	TOMM40	0.238578084114396	3.10887430852041	2.94398602100635	0.0286280076057489	0.286365278461077	-3.9153243790712
Q9Y653	GPR56; ADGRG1	-0.234533447067919	3.24630942232443	-2.25277882793187	0.0691984392205295	0.413468363058133	-3.91657573062828
Q68DA7-5	FMN1	0.0729671410132197	3.41094487231324	3.17094302667247	0.0217366352756123	0.259524320248963	-3.91915119508853
P54136-1	RARS	-0.157412298093403	3.3051284771639	-2.80832755391733	0.0338740824412289	0.306181616988054	-3.92158581205166
Q8IUX4-1	APOBEC3F	0.125820808911734	3.42135533996204	2.749441590383	0.0364706834823413	0.314302479959357	-3.92342923778374
P31937	HIBADH	0.116324246463153	3.3245904947393	2.87652541491073	0.0311161492246464	0.295427620180895	-3.92522453981808
P21359-1	NF1	0.142631653967971	3.10424289910016	2.68798745266836	0.0394131714445639	0.326275047352658	-3.92673772702715
Q96S90-1	LYSMD1	0.134946403297753	3.26215119588165	2.58763816296299	0.0447854793848197	0.345043098497049	-3.92815096933002
P37802-2	TAGLN2	-0.0675292894374608	3.35411717007632	-3.7010894515422	0.0117846733787203	0.218830316165078	-3.93272594440605
Q9BT30	ALKBH7	0.194654628977075	3.35983237214277	2.43989228127056	0.0541804612155271	0.370123028750786	-3.93305737182038
Q9NP73-2	ALG13	-0.167562063395957	3.3768062393683	-2.5520147024494	0.0468784490092966	0.349581915327794	-3.93599168154045
P30038	ALDH4A1	0.211405906245182	3.27395779982567	2.75466634258218	0.0362317549859094	0.314040189158639	-3.93894371220262
Q05BQ5	MBTD1	-0.266216669375173	3.21953604409836	-2.2294831158029	0.0713555802735897	0.418626338101832	-3.93914280616056
P62280	RPS11	-0.118829761576827	3.27386448872927	-3.33439311012911	0.0179137605898903	0.243661001284326	-3.94117333430353
Q5VUG0	SFMBT2	0.156051673610183	3.36166337434731	2.67928698423201	0.0398501663342586	0.327998852147522	-3.94145645221084
Q6NUK1	SLC25A24	0.301347814180965	3.00308404523255	2.82772224086811	0.033063541274071	0.301564619327415	-3.94303910830306
Q86WA6	BPHL	0.306805271741609	3.32964255887517	2.42342313328021	0.0553516698297889	0.373193505111174	-3.9443232976578
Q86UA1	PRPF39	-0.0806985834224019	3.31496228488148	-3.06583161683332	0.0246695359744773	0.269202306526682	-3.94569406746334
Q8N5S9-2	CAMKK1	-0.301100800804816	2.90510963427728	-2.13138309613506	0.0812420738791113	0.44173736526193	-3.94951997341863
Q8NDZ4	C3orf58	0.0963684268136061	3.31775262766412	2.74715010701949	0.0365760133366643	0.314806609025682	-3.94972358987908
Q6IPR3-1	TYW3	-0.152139762551447	3.30975668210279	-2.42715763005385	0.0550837432238288	0.372133589900078	-3.95002062123177
Q13601	KRR1	-0.0754412454663689	3.26651785071393	-2.91556208296843	0.0296487320080155	0.290522997897785	-3.95455136691161
P61254	RPL26	-0.127517723932966	3.26675823635827	-3.15825236374151	0.0220693690370346	0.259807878576088	-3.96088372796591
Q9H0E9-2	BRD8	0.0841584033314072	3.26135255255955	2.97698665550895	0.0274910544371996	0.280417098523301	-3.9626855579883
P36776	LONP1	0.16936230592852	3.33226153624636	3.52245450140928	0.0144136200435515	0.235623788337841	-3.96308771242632
P49454	CENPF	-0.0553396397994707	3.24883134550901	-3.68012888369201	0.0120633351715704	0.221337305063426	-3.97368569778613
P78371-1	CCT2	-0.0613542501565879	3.28010257141321	-3.83562506177641	0.0101595654504104	0.206302065736636	-3.97505046282254
P00367	GLUD1	0.138857360357543	3.36539948727741	3.45425495657346	0.0155859668585006	0.240847975224922	-3.97768984858545
Q86YQ8	CPNE8	0.165114288176097	3.29101365322578	2.40357329685694	0.0567992656280429	0.377650507964099	-3.97786499827015
O00142-6	TK2	0.198882139425626	3.40644651884627	2.2434797947898	0.0700511800260864	0.415294218927159	-3.98102689745729
Q92597	NDRG1	0.0667461540319491	3.40109746043266	3.4700193842911	0.0153057835312381	0.240404454826983	-3.98331135832252
Q9NRK6	ABCB10	0.252665049396205	3.18093857458355	2.84978057328684	0.0321673286345007	0.299423036123701	-3.98395436957983
P48147	PREP	0.0681282901714767	3.34945690609816	3.54277775975796	0.0140836128060972	0.23382252356165	-3.98450797937538
E9PAV3	NACA	-0.0775883661065947	3.30945172771412	-3.30494097707153	0.0185434457027888	0.24377063557619	-3.98482966099473
P84095	RHOG	0.0918841790745641	3.33247900451842	2.81382340928927	0.0336422207260856	0.305186245237176	-3.98768261232889
P41567	EIF1	-0.0736921217076681	3.34214678662976	-3.07893621780327	0.0242810714420798	0.26669503632951	-3.99148793951805
Q9H4G0-1	EPB41L1	0.129138635269563	3.46348718292002	2.61158365838952	0.043435317807284	0.34349671329478	-3.99327558880712
Q6P587-1	FAHD1	0.180651537064127	3.36790734723007	2.80542726233671	0.0339971434653974	0.306181616988054	-3.99362567455796
Q9NVA1	UQCC; UQCC1	0.102870490703267	3.26040024057129	2.631405383241	0.0423508856926323	0.340077141862041	-3.99848867579169
Q9Y6C9	MTCH2	0.136569213257643	3.23181628250941	3.03710231023923	0.0255453837512234	0.271334002886482	-3.999733764682
Q9NYU1	UGGT2	-0.13117084229451	3.26167872408779	-2.58183489035134	0.0451194611673097	0.345043098497049	-4.00134863841278
Q9H8H2	DDX31	-0.104614142684165	3.32982208869828	-2.81593805842562	0.03355346866167	0.304792454518575	-4.00311061455431
Q7RTV0	PHF5A	0.0990475297492331	3.30722378090507	2.79379129072894	0.0344957883426884	0.306181616988054	-4.00365877051324
Q06210-1	GFPT1	0.0434808776616999	3.38576977065204	3.66015021325941	0.0123358595993504	0.223393367776734	-4.00368644407541
P21953	BCKDHB	0.16593385821829	3.38139775228802	2.64605557061618	0.0415681903923504	0.335842999780504	-4.00514056389933
P56377	AP1S2	0.11428520388805	3.39843087722099	2.54534178885869	0.0472820739380361	0.349581915327794	-4.00524584585773
O94826	TOMM70A; TOMM70	0.18172848774292	3.21626290679038	3.34302183206342	0.0177338167062145	0.243661001284326	-4.00812259893728
P04233-2	CD74	0.0863661342361173	3.37166800791885	3.31584010955466	0.0183075945701558	0.24377063557619	-4.01153545600766
Q96EA4	SPDL1	-0.181731365132761	2.93426192582336	-2.58420334317125	0.0449828323577854	0.345043098497049	-4.01160470791254
Q9UGK3-2	STAP2	0.172560197298651	3.42200477810767	2.34259678007069	0.0615034575245342	0.392574553785333	-4.01497601831434
P55735-3	SEC13	0.131971525962837	3.36426513699983	3.24434993586545	0.0199178158216266	0.251668342016868	-4.01931331905594
P46939-2	UTRN	0.0657995125210623	3.22417096089544	3.29624886309858	0.018733962891447	0.24499941353367	-4.03980373709545
Q13242	SRSF9	-0.115845675797278	3.11663174938355	-3.04892588817377	0.0251808428749028	0.271259015713296	-4.04018893515829
Q8N9Z2-1	CCDC71L	-0.348697937717807	3.21324821656235	-2.28962192219114	0.0659257559588679	0.406895202351148	-4.0457647503589
Q7L8W6	ATPBD4; DPH6	-0.119185345196927	3.34531732379067	-2.69493495600384	0.0390679511749	0.326275047352658	-4.04612521776032
Q9NXE8	CWC25	-0.162049655982732	3.29876752585434	-2.70083135889706	0.0387775312910396	0.325606455373097	-4.04767509237569
P63220	RPS21	-0.0651160716717959	3.33948047049426	-3.19890552272537	0.0210229328991008	0.257255654612402	-4.04780819236806
P52333-1	JAK3	-0.203128358777	3.35171554825596	-2.43092524408851	0.0548148412195532	0.371743599673863	-4.05169594667561
Q9BYG5	PARD6B	0.117184601765107	3.04752746134383	2.49813552346768	0.0502462417274923	0.354928140129403	-4.05477030321636
Q9NQ86	TRIM36	0.205747386236364	3.43478943299192	2.27640114471955	0.0670809611280359	0.410560136745603	-4.05497064227009
Q9UBL3-1	ASH2L	-0.046994709260655	3.31098528551481	-3.26374021520846	0.0194660448832795	0.249239530867438	-4.05879227999279
P62913	RPL11	-0.0869651517520356	3.31820510549026	-3.09748643098511	0.023742676867455	0.265070049067139	-4.06562449363555
O00488	ZNF593	-0.1942352420446	3.32493899741914	-2.29662077837108	0.0653227211104722	0.406573454911661	-4.06955192608722
P47712	PLA2G4A	0.130521907049708	3.44859092561655	3.13225366262828	0.0227687755728915	0.262975445706145	-4.07282197094327
P38432	COIL	-0.103185302261577	3.23319715579362	-2.88864580809049	0.0306521945900367	0.29513264312345	-4.07478898889913
P22830-2	FECH	0.190968944178456	3.34118636177109	2.96070494922949	0.0280456747567153	0.28392021944976	-4.07817216206691
Q86V88	MDP1	0.313669907761399	3.46298224446516	2.53535329150119	0.0478932432351106	0.350497604810886	-4.08302480042671
Q5T1C6	THEM4	0.186750891210029	3.33564926062503	2.53315029285064	0.0480291776566293	0.350545203265866	-4.08390584437012
Q96BP3	PPWD1	0.119718240191332	3.31839682093226	3.11613283681929	0.0232147497219031	0.265070049067139	-4.08488784762982
O75843	AP1G2	-0.0821509055412296	3.35171589432174	-2.75536255184271	0.0362000460151209	0.314040189158639	-4.0854859106568
Q53GS9	USP39	-0.0620539350522767	3.32105979587442	-3.07751490745557	0.0243228756852049	0.266718385572508	-4.08758192310311
Q9BUF5	TUBB6	0.263749355860291	2.06318038576628	2.5087715430606	0.0495614068967873	0.354928140129403	-4.08898368570853
P86790	CCZ1; CCZ1B	-0.132412912877125	3.26083268688661	-2.79511795166655	0.0344385353016115	0.306181616988054	-4.09436987369881
Q9UJ41-1	RABGEF1	0.0989977522775942	3.33598773050406	3.02727192402194	0.0258529014437911	0.274105999219501	-4.09782355284248
L0R6Q1	SLC35A4	0.178057464141401	3.29834284418634	2.40147481748453	0.0569546415092355	0.378309387574191	-4.09816876903928
Q92665	MRPS31	0.120209354937435	3.28863788427266	2.85042874481434	0.0321413985462639	0.299423036123701	-4.1032974394109
Q9H3Z4	DNAJC5	-0.362938647048179	3.21287950420014	-2.56532333015329	0.046084469027647	0.348458718564503	-4.10580915520057
P82673-1	MRPS35	0.190971042403261	3.28558047098731	2.83714736112606	0.0326773119701471	0.300488223068849	-4.10632906181373
Q9NQ50	MRPL40	0.16664571531387	3.35022352925888	2.58099499287701	0.045168019594633	0.345043098497049	-4.1096846572769
Q5VTR2	RNF20	-0.0713255506394079	3.2971996880625	-3.32100518183713	0.0181969930714325	0.24377063557619	-4.11738212863471
Q01469	FABP5	0.0467773634778221	3.40056115848504	3.41162515596184	0.0163727798812474	0.243661001284326	-4.12253043882878
O95202-1	LETM1	0.363133628610753	3.18942870085382	3.15133093123801	0.0222532146386883	0.259924995671717	-4.12426117154514
Q96ER9	CCDC51	0.138718338064521	3.17885989393973	2.53756648042197	0.0477570959901457	0.350462007910218	-4.12863615719506
Q13416	ORC2	-0.083125452762441	3.20590608078138	-2.8636188054115	0.0316186633017962	0.297675986995342	-4.1288950907136
P49411	TUFM	0.210659287295294	3.31135757420368	3.39853853082951	0.0166231444762599	0.243661001284326	-4.12932717880137
Q969Y2-2	GTPBP3	0.126383866379242	3.3251233816243	2.53520552413515	0.0479023481732398	0.350497604810886	-4.13540858916851
Q8TEP8-3	CEP192	-0.103718940537661	3.31446846394477	-2.88314148061182	0.0308619484809818	0.295427620180895	-4.13659123978595
Q8N3U4-2	STAG2	0.0682722341837516	3.28018055369887	3.18931917580582	0.0212646419774631	0.258264165496019	-4.1376945434976
P07602-3	PSAP	0.0595438613304105	3.37178481385172	3.09989488197442	0.0236737472783966	0.265070049067139	-4.13810793635135
Q69YQ0-1	SPECC1L	-0.0859310271598488	3.32551005317275	-2.9538396361381	0.0282832097046409	0.285137029300641	-4.13976957244574
Q96SI9	STRBP	-0.0857941425370606	3.3073646902389	-3.16054190571384	0.0220089253569586	0.259697825878857	-4.14140612858149
O75419-3	CDC45	-0.139018765088136	3.18780337173365	-2.34167733949546	0.061577476187594	0.392574553785333	-4.14164486068968
P14868	DARS	0.0477857728330393	3.36086378689907	3.4587238402588	0.0155059626094326	0.240718431086849	-4.14173053866395
O75410-1	TACC1	-0.0576901454233546	3.40884701159738	-3.16946788625232	0.0217750247873274	0.259524320248963	-4.14460483671199
Q9NZE8	MRPL35	0.211503691848212	3.34979174589986	2.38894423274529	0.0578918937361374	0.380664306792202	-4.14472285887878
Q9BVW5	TIPIN	-0.21629916621788	3.15388911557677	-2.42993000593897	0.0548857370137675	0.371743599673863	-4.14756261954826
P63098	PPP3R1	-0.085226480340178	3.45892606007823	-2.85166478635065	0.0320920140301293	0.299423036123701	-4.14910992676097
Q15007	WTAP	-0.0954109109152121	3.22200976903362	-2.95355438665357	0.0282931268288497	0.285137029300641	-4.15114180677388
P57105	SYNJ2BP	0.203724468342128	3.1828458629988	2.25307138606294	0.0691717887613467	0.413468363058133	-4.15119959572191
Q8WV74	NUDT8	0.181559021251741	3.39601848014553	2.79991374839344	0.0342324315250905	0.306181616988054	-4.15407770959066
Q14919-2	DRAP1	0.11598115119564	3.35841956121655	2.72172279262428	0.0377672502443989	0.32076232818425	-4.15806318283946
O95573	ACSL3	0.102900301300171	3.28373007507741	2.84768737756431	0.032251223140552	0.299423036123701	-4.15863139384137
Q9Y2Q9	MRPS28	0.136751955975596	3.29204143553284	2.50598178269718	0.0497400614253905	0.354928140129403	-4.15971852657414
Q15691	MAPRE1	-0.059701687066936	3.31495260485052	-3.28809819798248	0.0189145926920754	0.246402891620409	-4.16001923093371
P49137	MAPKAPK2	-0.0743092572766977	3.34764815224929	-2.84393328097596	0.032402285534884	0.299598574092834	-4.16121337442627
P80404	ABAT	0.141937972514122	3.3063564220039	2.50436835575392	0.0498436992517041	0.354928140129403	-4.16289899882558
Q9BVJ6-1	UTP14A	-0.0613808018183677	3.27240343917659	-2.99894554608264	0.0267620536725946	0.276760807364894	-4.16556746624395
P82664	MRPS10	0.27199771791681	3.33219281854495	2.43831797688127	0.054291267294498	0.370503450511285	-4.16586530394233
Q86V87	FAM160B2	-0.227269143093256	3.28596081547323	-2.03975584725886	0.0917660472416769	0.462926928989247	-4.16592456136336
Q96MG8-1	PCMTD1	-0.255975490863101	3.31974415395902	-2.05631623581691	0.0897644917313385	0.461431402796698	-4.16735896086538
Q08043	ACTN3	0.239828458211324	3.43274527870901	2.14048628608316	0.0802672356350335	0.439571288174024	-4.16837761686484
P13861	PRKAR2A	-0.100821410383677	3.32242696101078	-2.93294761129606	0.0290197530728801	0.287689039608765	-4.16873676203162
Q9BZE1	MRPL37	0.209631076838202	3.33489831585439	2.83176875734088	0.032897112936193	0.300494319433353	-4.17451675579556
Q14807	KIF22	-0.105169024208692	3.25907226081507	-3.0187851654717	0.0261216692597027	0.274181563386866	-4.17897026539155
P26583	HMGB2	-0.118685420892325	3.34045481509541	-3.38751142221179	0.016837427947269	0.243661001284326	-4.17926948658662
P31323	PRKAR2B	0.14088799035748	3.28323244581366	2.50699343581615	0.0496751961332897	0.354928140129403	-4.1794590325222
P30279	CCND2	0.202328386753601	3.407641955999	2.19718950535836	0.0744632950695867	0.425923486954603	-4.1796214793809
P35790	CHKA	-0.118720297627004	3.27392124649695	-2.29664685368562	0.0653204853265713	0.406573454911661	-4.18063420931741
P41440	SLC19A1	-0.190968255975805	3.3250356646258	-2.13734895338404	0.0806018230419129	0.440064184082739	-4.18361772971534
Q9BTZ2	DHRS4	0.0966331956033726	3.34733317155352	2.7333668023415	0.0372165921475732	0.317474533522826	-4.18506424038644
Q9NRX2	MRPL17	0.116252954762504	3.37399635015631	2.36742394809765	0.0595400124445012	0.385204969828621	-4.18560333546615
O60502	MGEA5	0.058018989400187	3.36232227237994	3.24940092439959	0.0197990220943597	0.25158606147124	-4.18704151809368
Q8N3J5	PPM1K	0.152235103621937	3.41174602223618	2.15481308087457	0.0787576051607989	0.436147626784173	-4.18735654788157
Q14814-1	MEF2D	-0.0778046625940091	3.41026869927314	-2.67898601351738	0.0398653767040353	0.327998852147522	-4.18883484116082
Q9UKV0-7	HDAC9	0.156785286478527	3.43638850740864	2.3273867560807	0.0627401326937507	0.395999222504594	-4.18901604423679
O95295	SNAPIN	-0.117303154929621	3.34366739538934	-2.55255909560628	0.0468456840642122	0.349581915327794	-4.19207713179387
Q8TDH9	BLOC1S5	-0.131097888184106	3.3349135987677	-2.54631201244229	0.0472231566271652	0.349581915327794	-4.19218713615686
Q8N3X1-2	FNBP4	-0.0832920051998338	3.30952754448761	-3.06053735073421	0.0248284165726857	0.270496946842129	-4.19316619073542
Q14693-2	LPIN1	-0.0622381100046708	3.40846563859906	-3.10015720356269	0.023666253025927	0.265070049067139	-4.1936236483426
Q96I59	NARS2	0.196603901951796	3.21592128820811	2.64354809330591	0.0417010371913721	0.33651185114094	-4.1977147780042
O00716	E2F3	-0.255112634004733	3.32162574662084	-2.11409527401225	0.0831274191703383	0.444574350408912	-4.19966387605445
Q562R1	ACTBL2	-0.198445329942785	3.36324535065991	-2.39962568838294	0.0570919298451104	0.378473325856837	-4.20460131559351
P09496-2	CLTA	-0.118523955383823	3.35046406225207	-2.86079747868704	0.0317296888391097	0.297886827341474	-4.20752078024118
Q9NVC6	MED17	-0.0780319270772033	3.26697692300854	-2.80552284802956	0.0339930799490782	0.306181616988054	-4.20931769852211
Q99538	LGMN	0.0886048544929659	3.3810055323749	2.9191774935007	0.0295167114983111	0.289651583491456	-4.2108766659971
Q9BY49-1	PECR	0.100070052351197	3.39535072057498	2.6037703599595	0.0438709804247387	0.344060199671958	-4.21166589779016
Q9NUG6	PDRG1	-0.112990836771262	3.29314275612891	-2.35727848855046	0.0603342083225587	0.387360600137765	-4.2146236395217
Q9UHB7-1	AFF4	-0.0796916068897638	3.22563711677539	-2.69249256804806	0.0391889379446345	0.326275047352658	-4.2154193735858
P20645	M6PR	0.09325631562001	3.37775688745769	2.75488859465561	0.0362216291952449	0.314040189158639	-4.21562432577339
O60566-3	BUB1B	-0.0671268023814833	3.27113045083316	-2.99185096768152	0.0269952307110447	0.277288738922966	-4.2197425715222
O00418	EEF2K; LOC101930123	-0.0771099327591708	3.33288247992756	-2.65900878336876	0.0408891755400338	0.333291357223689	-4.22246948918691
Q9NS93	TM7SF3	0.139801238952151	3.34892357300723	2.17380451982966	0.076801941022099	0.430218872958791	-4.22592773891248
O75396	SEC22B	0.079929411788912	3.29450608672788	2.8695828145268	0.0313853619818269	0.296309555114944	-4.22655252723306
Q9HCU5	PREB	-0.0873458513889363	3.27556526320379	-2.65869865855255	0.0409052915366771	0.333291357223689	-4.22758530954639
Q16706	MAN2A1	0.0445978363082578	3.41546730909961	3.48348989478915	0.0150708294247176	0.240061884817421	-4.22817787646221
Q92552-2	MRPS27	0.178201726575743	3.24858548232861	2.75111697811212	0.0363938817030412	0.314043225684009	-4.22984645095568
P54687-5	BCAT1	0.285906967536884	1.98635329969218	2.37951040191473	0.0586083323640238	0.382743317388054	-4.22991776687483
P42568	MLLT3	0.118819798972688	3.23237200809123	2.34931747414582	0.0609652692394629	0.389922492699971	-4.2304320011457
Q6NYC8	PPP1R18	0.0597594717576401	3.40670684542809	2.94897993525041	0.028452687190973	0.285887837515277	-4.23098149550955
O00571	DDX3X	-0.0611513281564093	3.28069475655706	-3.39614151708221	0.0166694641020381	0.243661001284326	-4.23255468659483
Q9NWU5	MRPL22	0.177982529250405	3.32147160969549	2.62963758103936	0.0424464031571337	0.340077141862041	-4.23350503208528
Q5TEU4	NDUFAF5	0.15846903713061	3.3827181917339	2.02918702505045	0.0930674266012193	0.465030529005353	-4.23353577923046
P53350	PLK1	-0.0628472888096184	3.23906038012402	-2.87976644006902	0.0309913382336783	0.295427620180895	-4.23585257720563
O75935	DCTN3	-0.169566677175626	3.3160568920902	-2.74072002128275	0.0368733475308375	0.316151329212104	-4.24033303056131
Q8TBC3	SHKBP1	-0.133215872666818	3.26816573598396	-2.15102539114084	0.0791538194913446	0.437590087768181	-4.24176406517488
Q96G74-1	OTUD5	-0.101267603617349	3.2949904823229	-2.56952468619024	0.0458368340805839	0.346976575100997	-4.24365210061276
O75844	ZMPSTE24	0.117799609981558	3.27861637338429	2.94577431085908	0.0285650905162662	0.286161756259824	-4.24423455263664
Q9GZT9-1	EGLN1	0.137548012344473	3.37642061148779	2.87338320453944	0.0312376802205773	0.296045710349158	-4.24574199633206
P61018-2	RAB4B	0.128702419210871	3.37199807101495	2.32998458105775	0.0625270623923542	0.395396908185706	-4.24596788968381
Q9NPJ3-1	ACOT13	0.171134669024217	3.39561907824367	2.61235058642574	0.0433928068211897	0.34349671329478	-4.24913808565392
Q5T653	MRPL2	0.120238868639769	3.33631268952622	2.46785354389114	0.0522521396883249	0.362275997082615	-4.25605648602953
P51161-2	FABP6	-0.134269445919996	3.32814006896583	-2.4096851443893	0.0563492964512166	0.375316199933497	-4.26076901177129
Q96BR5	SELRC1; COA7	0.0765239443001952	3.33082599105345	2.83887090529896	0.0326072177021089	0.300488223068849	-4.26362291900812
Q9NR09	BIRC6	0.0386738056773786	3.32674037263766	3.26394447671702	0.0194613468357156	0.249239530867438	-4.26410942067617
P37837	TALDO1	-0.0436803075254037	3.37414829454458	-3.4672741566852	0.0153541670938834	0.240404454826983	-4.26462963742939
Q86Y39-1	NDUFA11	0.212051768059834	3.21969046569072	2.1802460592062	0.0761501849362533	0.429034095526085	-4.26824648625823
Q5TDH0-3	DDI2	-0.05836550366694	3.36456293947053	-2.88534627390852	0.0307777421644658	0.29513264312345	-4.26834045828233
Q96CX6	LRRC58	-0.122161217168517	3.33447073979565	-2.29788485490725	0.0652144278957398	0.406573454911661	-4.26954766299204
Q9NQX4	MYO5C	0.10991980706631	3.36504034272566	2.35470684076472	0.0605372993245175	0.388293631736075	-4.27129958147821
O60828	PQBP1	-0.0622052934271032	3.30348468431237	-2.76584259950915	0.0357263604719164	0.312698691526331	-4.27260849913395
O75817	POP7	0.177145740433692	3.29148060349397	2.26795596485514	0.0678300342277486	0.411882104859012	-4.2740027210719
Q9Y2Y9	KLF13	0.143885165528676	3.35979977853254	2.27553169687793	0.0671576756996121	0.410560136745603	-4.27475058179625
O00165	HAX1	-0.111552215705989	3.36372683600346	-2.54292556176099	0.0474291441206408	0.349581915327794	-4.27829436133319
O75330-3	HMMR	-0.0686260608444363	3.26611888266271	-2.88721071556284	0.0307067309549211	0.29513264312345	-4.2783411372752
Q99536	VAT1	-0.0706226224271561	3.05199561021994	-2.76246287325612	0.0358783790620236	0.313620889538261	-4.28070773190587
P52758	HRSP12; RIDA	0.16510161692073	2.65977601392123	2.30875440672562	0.0642910210720227	0.403138286983336	-4.28091873609055
Q15813-2	TBCE	0.0830240569583786	3.28590052498751	2.90707490944597	0.0299612006070069	0.292306517387954	-4.28710068566171
O60337	MARCH6	-0.23298619219708	3.24530569159617	-1.84745876333075	0.118646967108513	0.505277964465503	-4.28784576648567
Q96AT1	KIAA1143	-0.279114086814634	3.2587737401841	-2.66288546888977	0.0406882977952744	0.332733257639701	-4.29108745001762
Q9P0T7	TMEM9	-0.467819060024671	3.06792841892118	-2.04549117119677	0.0910676952425519	0.461672708865106	-4.29196194207473
Q8NHV4-3	NEDD1	0.0800746873152743	3.32596207061309	2.71640925947512	0.0380214676338441	0.321889553444207	-4.29299605729635
Q9UIA9	XPO7	-0.0525869529815224	3.31889202399144	-3.16250842852739	0.0219571556729634	0.259697825878857	-4.29503308206726
Q9NR30-1	DDX21	-0.0771372953485844	3.19868759605597	-3.36104550295252	0.0173644115523412	0.243661001284326	-4.29537943932083
P38606	ATP6V1A	0.0364135483812631	3.37352729024076	3.28609331090817	0.0189593200291775	0.246507832178203	-4.30209131294754
Q76I76	SSH2	0.102949313093829	3.34212713399685	2.49879944530738	0.0502031975710986	0.354928140129403	-4.3047257469525
P12236	SLC25A6	0.244660930644009	3.07829050494079	2.49551558558405	0.0504164868410175	0.354928140129403	-4.30590004150462
Q8IUH4	ZDHHC13	0.0922586221317128	3.28076560680821	2.41456135084505	0.0559930203829201	0.375053926324511	-4.30670168025081
Q12972-1	PPP1R8	-0.0648831215022132	3.28303971760567	-2.82151254281391	0.0333207290153052	0.303498564283038	-4.31001907320942
O76080	ZFAND5	-0.143748003771469	3.27889976829943	-2.63327018667612	0.0422503786918757	0.340077141862041	-4.31064127764562
Q9NX05-1	FAM120C	0.272786464168312	3.28106470381865	1.92804866002134	0.106520506016529	0.489761177457665	-4.31083369311927
O14880	MGST3	0.234758609522413	3.2297982227874	2.55516124067541	0.046689410649375	0.349581915327794	-4.31211191439525
Q96G04-1	FAM86A; EEF2KMT	-0.13100372213575	3.40328555744395	-2.14204417298901	0.0801016289966121	0.439571288174024	-4.3153348826049
Q86V81	ALYREF	-0.0936662236265334	3.24064808502257	-2.80707459660785	0.033927186426074	0.306181616988054	-4.32144378471409
Q9H993	C6orf211; ARMT1	0.13227741713859	3.26060909772933	2.61017796436956	0.0435133524436912	0.34370946548354	-4.32283191849967
Q9UIU6	SIX4	0.153965650730717	2.57535363508638	1.98518038904243	0.0986933773772403	0.476935214040122	-4.32314875498373
Q9UI95	MAD2L2	-0.122702127408449	3.3357909324339	-2.29500988754778	0.0654610009724757	0.406681006041572	-4.32368143263949
P56556	NDUFA6	0.127774267389289	3.37065380147496	2.68011491090579	0.039808357243152	0.327998852147522	-4.32843542621791
P62072	TIMM10	-0.0904453753175912	3.36355974418608	-2.66385387136219	0.0406382850895412	0.332729052828131	-4.32944916605218
O43516-1	WIPF1	-0.0615644112020086	3.41160578406894	-2.86815528037025	0.0314410326366438	0.296418823819803	-4.33019641764492
P98155-1	VLDLR	0.153736157152611	3.35321288849351	2.06902548825713	0.0882589875023451	0.458549280965703	-4.33037188674501
P41970	ELK3	0.125608563099298	3.43909275365408	2.20470340830758	0.0737277667380531	0.424456394777996	-4.33263215560623
Q96QU8	XPO6	-0.0914746524724344	3.27736499956679	-2.44113292111748	0.0540933098511479	0.369903589846812	-4.33322016638971
P62253	UBE2G1	0.081733581245665	3.35709836668714	2.71691352438647	0.0379972622946248	0.321889553444207	-4.33551494706174
Q9UBQ7	GRHPR	0.0934595173019856	3.36178723679574	2.89417381127062	0.0304431084875595	0.293876711195934	-4.33660035004598
P23634-1	ATP2B4	0.143748846907149	3.26273299101612	2.45736621212215	0.0529666554555156	0.364050979521447	-4.33829933769278
O75143-5	ATG13	-0.206775854929083	3.32185099047475	-2.41268594785382	0.0561297604704639	0.375053926324511	-4.33862223105344
Q9NX55-2	HYPK	-0.110244671177192	3.32822923793059	-2.62619266960331	0.0426332070159893	0.340356790453064	-4.33915586991955
P62314	SNRPD1	0.111264137751632	3.29904642327795	2.62090648376756	0.0429215845070762	0.341442474623155	-4.34008259251834
Q9BUR5-1	APOO	0.212529769978193	3.28191601162776	2.28281834253505	0.0665175966666033	0.409096412599495	-4.34427412111031
P49914	MTHFS	0.105251942857341	3.39052832127216	2.62223833492665	0.0428487300378774	0.341322588852333	-4.34488813687993
Q9Y608	LRRFIP2	-0.119420883761756	3.27647909369311	-2.44346028879877	0.0539302222976175	0.369540218434847	-4.34525164578946
Q8N6H7	ARFGAP2	-0.0593618575194428	3.37160139302017	-2.90433202866631	0.0300629543424939	0.292450331534362	-4.34717564607715
Q9HD15	SRA1	-0.101374935525014	3.33959546248227	-2.59407415292538	0.0444181968258954	0.344779583214399	-4.34773771274729
Q9Y6Y0	IVNS1ABP	-0.110019284873192	3.2521976493778	-2.46704603942942	0.0523067882522104	0.362275997082615	-4.35002189119318
Q9P013	CWC15	-0.27586485815533	3.29771723929313	-2.48226325069673	0.0512871481314695	0.359491355307339	-4.35016989219282
P49674	CSNK1E; LOC400927-CSNK1E	-0.144598236279828	3.24032304319783	-2.03410429187618	0.0924595972132695	0.463579436397911	-4.35061381266319
O00308	WWP2	-0.0826610309137875	3.2539832699913	-2.55348028293029	0.0467902973843204	0.349581915327794	-4.35183966061747
P51151	RAB9A	0.106026791249993	3.24145861928885	2.24513058315262	0.0698989966938286	0.415294218927159	-4.35549622815214
Q6FIF0	ZFAND6	0.190870217669818	3.35138032521201	2.5440407221718	0.0473612058832784	0.349581915327794	-4.35582514242689
P28324	ELK4	-0.154137862257667	3.39578539848802	-2.01566765078697	0.0947598498907887	0.469054279061769	-4.35928114329934
Q96EZ8-2	MCRS1	-0.148712861989966	3.29526082301475	-2.33657050007417	0.0619903183256352	0.39348339923033	-4.36028815333912
Q9NVZ3	NECAP2	-0.0842964394993683	3.38784787109254	-2.549130997254	0.047052419594213	0.349581915327794	-4.36080234790464
Q8IVD9	NUDCD3	-0.150795115160267	3.35358968159638	-2.7361281395024	0.037087288872193	0.316849125401861	-4.36230604447808
Q9H2V7	SPNS1	0.19687290986123	3.31894079564991	1.97594212780191	0.0999180555462398	0.478571009778351	-4.36363987995384
Q9HCC0-1	MCCC2	0.171308058548862	3.38484729945228	2.79901632002495	0.0342708968340668	0.306181616988054	-4.36673324530568
Q9NVX2	NLE1	-0.0886557194689447	3.29564569693136	-2.72451162362998	0.0376345621479369	0.320525815583773	-4.36721520486401
O75477	ERLIN1	0.113079805686924	3.13342749199206	2.51736067219839	0.0490156710580535	0.3531439880517	-4.36850839032694
Q5TC12-1	ATPAF1	0.127942232582586	3.25895150000081	2.52374866256722	0.0486139719270978	0.351757932501562	-4.36936732521708
Q8NE01	CNNM3	-0.070192514140346	3.33207142954265	-2.70261834531116	0.0386899784853388	0.325499418496179	-4.37028014596763
Q92747	ARPC1A	0.0932085483551398	3.3910279402139	2.98987388626228	0.0270606088565108	0.277288738922966	-4.37405288262188
Q2TAL8	QRICH1	0.113220539085292	3.31340772627461	2.5440505639482	0.0473606067644434	0.349581915327794	-4.3753536519816
Q9H9Q4-1	NHEJ1	-0.137070364594156	3.36457343824579	-2.4141417559562	0.0560235832038598	0.375053926324511	-4.37738712209912
Q8NFV4	ABHD11	0.146209489146303	3.44672031357964	2.46103445585121	0.0527155528883147	0.363255571041694	-4.37844746289442
P10809	HSPD1	0.113836671728782	3.36763649570521	3.96080887165826	0.00887153622749338	0.200698839917703	-4.37952707180499
O75795	UGT2B17	0.159068151373941	3.36978009831098	2.45306645799456	0.0532626146319432	0.365711231415651	-4.3800280219481
Q09028	RBBP4	0.0626613606767935	3.27605779263073	2.84169624439737	0.0324926699221483	0.300021603319617	-4.38053527275986
P51170	SCNN1G	-0.154905820573401	3.29296508837767	-2.27522465948413	0.0671847888158529	0.410560136745603	-4.38232954041987
Q9UQ90	SPG7	0.158566817531058	3.23942709430223	2.37132148245028	0.0592378661445915	0.384265782457218	-4.38409631001067
P14625	HSP90B1	-0.0578562456798661	3.39068150426486	-3.94642555538367	0.00900970801352695	0.201228807158008	-4.38497523897217
Q9BXR0	QTRT1	0.104123153611594	3.37592785487742	2.34211078803881	0.0615425700869797	0.392574553785333	-4.38524577234546
P56270-2	MAZ	-0.153726474544029	3.21382959031874	-2.15097209936623	0.0791594089149223	0.437590087768181	-4.38736152783345
O43149	ZZEF1	0.0532131247275721	3.34344014267654	3.01713883164156	0.0261741626891356	0.274181563386866	-4.38912175513433
P17568	NDUFB7	0.15195870842413	3.26835615436558	2.12696357688695	0.0817197820903794	0.44173736526193	-4.39173898902431
Q86UE4	MTDH	0.0839965668059874	3.22164598907879	2.99024165392021	0.0270484343395667	0.277288738922966	-4.39402822646679
O60266	ADCY3	-0.11076192105699	3.29153957409958	-2.19449431382146	0.0747289925407488	0.426181847229707	-4.39687054481392
Q96IX5	USMG5	0.359001185740401	3.12241468934168	2.17617496652458	0.0765614238836652	0.429918733568019	-4.39713218819449
Q9H211	CDT1	0.151097001547006	3.28258118365548	1.94624613137331	0.103960978617641	0.483616400185318	-4.40097180780871
O00255-2	MEN1	-0.197448758910965	3.24871157947309	-2.60538430569553	0.0437806034388567	0.343800486350461	-4.40116532226162
Q5VWJ9	SNX30	-0.0751110172823936	3.26470316675859	-2.58268434645068	0.0450704072973984	0.345043098497049	-4.4055100892273
Q15131-1	CDK10	0.259001605603804	3.33915301197632	1.61998654706659	0.160842678346357	0.562238421135836	-4.40794470118121
Q12979	ABR	0.0921567831563417	3.41314433025699	2.75126988607649	0.0363868809825993	0.314043225684009	-4.40829074242035
Q5NDL2	EOGT	0.139385401249611	3.39958667879207	2.41958566184406	0.0556284316600541	0.374308626245129	-4.40877822435791
O00461	GOLIM4	0.105642940549815	3.20964608163404	2.55087847370135	0.0469469136781523	0.349581915327794	-4.41102371501482
Q99708-2	RBBP8	-0.110014129425963	3.30719285282539	-2.18180825081099	0.0759929943681993	0.428827219510811	-4.4111515766698
P17096-3	HMGA1	-0.106546184104805	3.32895887261803	-2.58178661915557	0.0451222504289661	0.345043098497049	-4.41200274432488
Q9BUB4	ADAT1	0.12435413831489	3.2520898617951	2.03714907911818	0.0920852775524861	0.463335002765982	-4.41269882545656
P61006	RAB8A	0.091725921009848	3.32982866530118	2.57700552085137	0.0453994395996886	0.345043098497049	-4.4135773839895
Q8WWK9-1	CKAP2	-0.10854073820419	3.21452520086438	-2.50373966177195	0.0498841457972303	0.354928140129403	-4.41407012073337
P16298-4	PPP3CB	0.112551177619713	3.3886777543587	2.32745709318087	0.0627343536260006	0.395999222504594	-4.41534141360352
Q99633-1	PRPF18	-0.108375332248752	3.31175916013123	-2.63053114791374	0.0423980931127303	0.340077141862041	-4.41846868793402
C9JLW8	FAM195B; MCRIP1	0.485341299101135	3.18761114656897	2.22256655232189	0.0720095481461917	0.418626338101832	-4.42172309808906
Q9NQ89	C12orf4	-0.133369374790792	3.35153048096953	-1.96602004089097	0.101250708588139	0.480315640881772	-4.42198656565612
Q9NXX6	NSMCE4A	-0.146761925096118	3.2250837270516	-2.12191792399887	0.0822687410502341	0.441951832529961	-4.4230021506463
Q8WXA3	RUFY2	0.153306052152508	3.33648151112981	2.43703521827492	0.0543817319336684	0.370744423994035	-4.4230032826849
O60508	CDC40	-0.0909359926072225	3.3003083488474	-2.8766689849159	0.0311106087538799	0.295427620180895	-4.42452840082158
P0C2W1	FBXO45	-0.180983506253699	3.32443160005867	-1.96877746409253	0.100878541411869	0.479226540897937	-4.427005003244
Q13017-1	ARHGAP5	0.094550057453346	3.16338344897296	2.37751662070185	0.0587609496495792	0.382743317388054	-4.42882134860082
O43920	NDUFS5	0.149753558263174	3.3356747463402	2.40909814217721	0.0563923478031586	0.375316199933497	-4.43293308742007
Q96PZ2	FAM111A	0.0808278638771568	3.43639713115314	2.55997999751356	0.0464014955790569	0.348893571904274	-4.43358375390123
Q9Y4G8	RAPGEF2	0.113446918049138	3.3882366831674	2.22261433232849	0.0720050089952231	0.418626338101832	-4.43419697012089
Q1KMD3	HNRNPUL2	-0.0360317347185497	3.34377751240424	-3.34607459265892	0.0176706372927427	0.243661001284326	-4.43755533259405
Q7Z6M4	MTERFD2; MTERF4	0.282494572197267	3.22114195531044	1.54863570390094	0.17688221382633	0.583709000360941	-4.4378390264779
Q9C086	INO80B	-0.118929436013427	3.32099282916341	-2.12409089063112	0.0820318574109381	0.44173736526193	-4.44042699028911
Q9HBH1	PDF	0.153561513587389	3.34378791035552	2.06271019164861	0.0890037937125019	0.459841822598449	-4.44442836620059
Q5T6F2	UBAP2	-0.104009781274269	3.33332167380107	-3.0698280399532	0.0245503465045861	0.268774314664214	-4.44540855129023
Q9NPE2-2	NGRN	0.277591502402893	3.32639681289693	1.68375758230047	0.14770894937737	0.547180403082038	-4.44879683973213
O00268	TAF4	-0.0890851449076038	3.29449446129258	-2.55496764007854	0.046701018129201	0.349581915327794	-4.45104678083723
Q9ULC3	RAB23	-0.136210944903909	3.24953150928626	-2.31423493629099	0.0638306779520451	0.400999829152941	-4.4576282051422
Q9NWZ3-1	IRAK4	0.073255894887063	3.40892068413206	2.60175441233554	0.0439841512662545	0.344192624926383	-4.45970191496008
Q9H3K2	GHITM	0.353082584408647	3.09013726116163	2.25433597504143	0.0690567156705498	0.413468363058133	-4.46217463156097
Q92520	FAM3C; WNT16	0.0509307101241598	3.3519395418777	3.04635050810376	0.0252597549634378	0.271261045713622	-4.4632160327899
Q6ZN17-1	LIN28B	0.250344166759357	1.66309840245413	1.90962076471328	0.109177787520101	0.492247105154085	-4.47022885630501
O95373	IPO7	-0.0678760035083706	3.29099549902842	-3.06655506666498	0.024647912536318	0.269202306526682	-4.47055033074985
Q9Y5W8	SNX13	0.17015409095325	3.29662034350604	1.86473208262298	0.115935405135638	0.500506261221513	-4.47531070265905
Q9UHC7	MKRN1	0.0975937977687465	3.30721140408325	2.20246319328804	0.0739462599773059	0.424864435817119	-4.47706994460353
P30044-1	PRDX5	0.0727593417998063	3.40511097097115	3.0536009480924	0.0250382882447612	0.271026366475498	-4.4803392357543
O95684	FGFR1OP	-0.114692288714569	3.2695041910675	-2.59707949119403	0.0442478043244357	0.344627633485128	-4.48173396854143
Q9P2J5	LARS	0.0552658626295183	3.31829239649094	3.04985074554682	0.0251525707308262	0.271259015713296	-4.4847496116039
Q9UNP9-1	PPIE	-0.0796661308144844	3.31054776422111	-2.5273741282949	0.0483875625774739	0.351253990978164	-4.48927375914509
P21796	VDAC1	0.1490715456073	3.25893686445443	3.10709097589513	0.0234691096718559	0.265070049067139	-4.490287840485
P43007-1	SLC1A4	0.0793555169656771	3.43538743082117	2.83203637593164	0.032886138400165	0.300494319433353	-4.49346674782434
Q9BQ39	DDX50	-0.106952388755481	3.19855361355643	-2.793085680955	0.0345262817133211	0.306181616988054	-4.49539499291171
Q14674-1	ESPL1	-0.0615769786396991	3.21552719249589	-2.68991298030089	0.0393171622700073	0.326275047352658	-4.49593514516472
Q9UBS0	RPS6KB2	-0.111402509922929	3.38408283344867	-2.04376757695161	0.0912769882204534	0.462021020194192	-4.4974450470587
Q96EY7-1	PTCD3	0.151423822608127	3.23578578886508	2.54592498961177	0.047246649317067	0.349581915327794	-4.49844348273429
Q13115-1	DUSP4	0.143558782792792	3.32245554136199	1.85536587336193	0.117397868517559	0.502642338964987	-4.50032824081115
Q9NX31	C20orf111; OSER1	-0.129935689839598	3.2639850726017	-2.00658922101643	0.0959140555739353	0.471098428120241	-4.50119585991237
P53674	CRYBB1	-0.0958385714858818	3.42112291712171	-3.10296021519291	0.0235863373611722	0.265070049067139	-4.50449607642858
Q6ZT07	TBC1D9	0.149109878285834	3.35684848540354	1.78386213887263	0.129191074608015	0.523869544618108	-4.50616140256366
P50990	CCT8	-0.0528860376591197	3.2794795437051	-3.40542240059476	0.0164909181579419	0.243661001284326	-4.50622432167106
Q8IY22-1	CMIP	-0.111397933202645	3.223658147602	-2.05567582670659	0.0898410509689394	0.461431402796698	-4.50697343603006
Q6ZU65-1	UBN2	-0.0909828509254173	3.29882267926028	-2.42951384453307	0.0549154112579806	0.371743599673863	-4.51104856305569
Q6P4E1-4	CASC4	0.0873111991033645	3.36049373686981	2.57908450027628	0.0452786839206377	0.345043098497049	-4.51196408007494
O15020	SPTBN2	-0.0599455811572799	2.81503140475797	-2.57973462886588	0.0452409928067212	0.345043098497049	-4.51285262984761
P15927-3	RPA2	-0.0756606782128023	3.27983377217033	-2.5978712246199	0.0442030330844282	0.344627633485128	-4.51830809378555
Q3MII6-1	TBC1D25	-0.121443774188699	3.37122152110703	-2.19666998634395	0.0745144333023823	0.425923486954603	-4.52086227393619
Q9P2R7	SUCLA2	0.170650576780096	3.2020315549421	2.51059891026078	0.0494447563970715	0.354714677162342	-4.52172555644548
Q8WVK7-1	SKA2	-0.106751586256717	3.21882323876108	-2.25148997942984	0.0693159749549242	0.413802827395205	-4.52571896890615
Q9GZS1-2	POLR1E	-0.0602254404595727	3.36865864809334	-2.58079664663882	0.0451794951382699	0.345043098497049	-4.52756284797465
Q96B01	RAD51AP1	-0.106329999463847	3.32280849458674	-2.19934057158837	0.0742519479747493	0.425871667479748	-4.5276483053678
Q15014	MORF4L2	0.0906603563471537	3.11843248435046	2.35732088277411	0.0603308663793312	0.387360600137765	-4.52887268373227
P16989-1	CSDA; YBX3	0.216083321084885	3.24338398199613	2.00251059949823	0.0964372891710876	0.471455605678582	-4.53152051551298
Q8NFG4-1	FLCN	0.164079536115427	3.24961483598684	2.12149125944555	0.0823153368532447	0.441951832529961	-4.53195401275153
Q96AJ9-2	VTI1A	0.116007845441117	3.32275604925319	2.1221853690144	0.0822395474997567	0.441951832529961	-4.53625572248338
O43291	SPINT2	-0.7329453183092	2.9564723756769	-1.4632469313898	0.198093425319987	0.606575422327871	-4.53905509513552
O95571	ETHE1	0.107325548747231	3.36906213437787	2.26594401431719	0.0680097868619705	0.412206813955565	-4.53952068070303
Q9NP97	DYNLRB1	-0.0871514181384564	3.26282134262225	-2.42815513722518	0.0550124125634822	0.372025590796506	-4.54484203209774
Q9BXW6-1	OSBPL1A	0.0921093596515334	3.35297088761878	2.52839898368316	0.0483237660163071	0.351170113688234	-4.55266138169602
Q96EL2	MRPS24	0.190082915646969	3.24536159654935	2.16176443596945	0.0780358226802773	0.434235761636444	-4.55728549637877
Q9NQS3-1	PVRL3; NECTIN3	-0.170277195728877	3.26873832940478	-1.74230968093483	0.136580650452765	0.533513509594352	-4.56117193014198
P01106-2	MYC	-0.174552060724955	3.27450577832837	-1.85313429246116	0.117749047369037	0.503504514258693	-4.5634133427693
O43181	NDUFS4	0.134618068953669	3.29039333704009	2.21983564248297	0.072269486856587	0.419512513514661	-4.56386382784939
Q6RFH5-1	WDR74	-0.145742945045111	3.32856042529023	-2.39383096434908	0.0575244434274452	0.380215642791826	-4.5661480116783
Q8WXI9	GATAD2B	-0.0525501943666654	3.29857913561311	-2.65632012048302	0.0410291237646469	0.333895605261448	-4.56666599255817
Q86Y07	VRK2	0.127771832412767	3.28196523161283	2.16311568072673	0.0778963210232314	0.433818616336505	-4.56688903877591
Q9UKI2	CDC42EP3	-0.30800589942486	3.22785216181655	-1.29326537399441	0.247581230647359	0.650094153285761	-4.57074833381692
Q5TFE4	NT5DC1	-0.0788556836439583	3.34954123941536	-2.76022272564973	0.0359795277372293	0.31376630182639	-4.57302635955882
Q15771	RAB30	-0.0735118175331098	3.40010020916674	-2.52478959924713	0.0485488495816399	0.351743112833806	-4.57765013076219
Q6NUM9-1	RETSAT	0.122356481010042	3.31279840893594	2.36396241047033	0.0598097308578866	0.385919256084586	-4.58287916292656
Q14320	FAM50A	-0.0797608945459465	3.27637709572787	-2.65273839013047	0.0412163628087453	0.3343003801978	-4.58461160920686
Q9NZR1	TMOD2	-0.183847237160992	3.34406937121706	-2.24774821401168	0.069658393697486	0.414875850916583	-4.58643254880735
P01903	HLA-DRA	0.065335613903166	3.46659605769218	2.55133263879697	0.0469195345907775	0.349581915327794	-4.58866642782509
O60518	RANBP6	-0.123341145185446	3.28383871677458	-2.30424448952593	0.0646724672218726	0.404774976411013	-4.59146077967466
P40222	TXLNA	-0.104266922478112	3.27483626684964	-2.78577826689892	0.0348438093158731	0.308184323975394	-4.59305826222186
O14979-1	HNRNPDL; HNRPDL	-0.0592288553942639	3.21604824627525	-2.90562247184404	0.0300150351684449	0.29240734261201	-4.59598862160079
P10644	PRKAR1A	-0.0519237747279838	3.39750162901065	-2.79380510608069	0.0344951915966217	0.306181616988054	-4.59745600800672
Q96IZ7-1	RSRC1	-0.140552678787615	3.29556434041369	-2.27272568093173	0.0674058919372091	0.410999468998721	-4.59936170012479
Q9Y312	AAR2	-0.216622848485898	3.24384243769106	-2.25068300382524	0.0693896734399369	0.413875230579641	-4.60060556055421
Q9H8M1	COQ10B	0.119357934337264	3.30915900222581	1.90181807110039	0.110323114143125	0.492247105154085	-4.60165384135177
O00311-1	CDC7	-0.113190966014951	3.01852869217348	-2.07997369013538	0.0869830179745253	0.456290572034877	-4.60274550604789
Q8IYA6	CKAP2L	-0.171250332723085	3.26164671204751	-1.75256809173764	0.134718169172753	0.532898650094154	-4.60356531648483
O00401	ASB15; WASL	0.121876471718662	3.08433556624148	2.19254959938181	0.0749213223692889	0.426218834370807	-4.60679927614732
Q5TAX3	ZCCHC11	0.0680984809280041	3.25058021482909	2.53101835439339	0.0481611218920693	0.350746545350476	-4.60810493679434
Q14566	MCM6	-0.0944465321096053	3.32652707347721	-3.09948013744448	0.023685601444566	0.265070049067139	-4.61251788677619
P40926	MDH2	0.146993880518913	3.36059597845568	3.11684837373028	0.0231947511808428	0.265070049067139	-4.61715673281115
P46779	RPL28	-0.127043445029186	3.26636947186039	-2.70433472706202	0.0386060867802993	0.325264099426568	-4.61716262524308
Q9Y251	HPSE	0.0845776796715868	3.42755837412872	2.15651201156002	0.0785805592087567	0.436147626784173	-4.61801391990374
Q13614-1	MTMR2	0.139158303944569	3.33108813989848	2.25415810544692	0.069072888994963	0.413468363058133	-4.61929100912637
Q9NWV8	BABAM1	-0.0656933594715749	3.34242493086338	-2.55236661310291	0.0468572660364955	0.349581915327794	-4.61942329661325
Q9NRA8-3	EIF4ENIF1	-0.0867363282079053	3.33160336001362	-2.56076218068615	0.0463549414641913	0.348893571904274	-4.61988763644789
Q9GZN8-2	C20orf27	-0.101197140569028	3.26499410748003	-2.45911021688314	0.0528471139708233	0.363601126010107	-4.62492633456171
Q86UD0	SAPCD2	-0.160749939978604	3.18368929847881	-1.73165265460385	0.138542536341244	0.536453300279863	-4.62678826240862
Q9H6V9-2	C2orf43; LDAH	0.129053119028797	3.36853169160543	2.33190076435816	0.0623703902825636	0.395030869953567	-4.62887566060708
O43719	HTATSF1	-0.0395247270598567	3.28509945039692	-3.01237976647065	0.0263265600121367	0.274564200712123	-4.6312479833047
Q7Z2W9	MRPL21	0.153800599572201	3.32802648608109	2.05393127830634	0.0900499491575006	0.461431402796698	-4.63246031305405
P82909	MRPS36	0.141394043070409	3.36593772766395	2.08429106492404	0.0864851047551669	0.455488672848916	-4.63435791987689
O43504	LAMTOR5	0.180649371589408	3.44538483725683	2.47757296083735	0.051599138545018	0.359974881568922	-4.63476696064465
Q96IR7	HPDL	0.135499711960087	3.16350857958947	1.75532238912152	0.134222415672839	0.532898650094154	-4.63603770000933
Q5JTH9-1	RRP12	-0.0450971342537967	3.34204074828885	-3.01675750246694	0.026186337949177	0.274181563386866	-4.63619471480127
O14641	DVL2	-0.142373824237485	3.19486866076161	-2.23678278233075	0.0706721457882665	0.417591788065685	-4.63741226019404
Q5VWN6-1	FAM208B	-0.0917921872700627	3.12334085184073	-2.24365320524371	0.0700351772620747	0.415294218927159	-4.63851756019409
P62699	YPEL5	-0.225240095080273	3.31789923163729	-1.75988854454474	0.133404530464811	0.532890148568462	-4.64071610313508
Q5TH69	KIAA1244; ARFGEF3	0.0623801192842537	3.38599387285474	2.53113362189909	0.0481539781205196	0.350746545350476	-4.6413358367205
O95140	MFN2	0.0912830937101566	3.2686451790284	2.4755776955039	0.051732475422178	0.359974881568922	-4.6415365529149
Q96MT8-2	CEP63	0.122396238569441	3.36327472704729	2.18181066759522	0.0759927514498056	0.428827219510811	-4.64225603368621
P78536-1	ADAM17	0.0788824091934956	3.35858358394726	2.26005343267939	0.0685389550358992	0.412830515906196	-4.64561986155202
O94768	STK17B	-0.087826882607076	3.37566627113244	-2.32613738626746	0.062842877881747	0.39611350935624	-4.64670961053612
Q6PJF5-2	RHBDF2	0.0831848136702237	3.40377297909163	2.41155727541839	0.0562122260434534	0.375231959745872	-4.64921085911186
Q96R06	SPAG5	-0.0840092525519612	3.23418770948961	-2.60918847470889	0.043568372934257	0.343740144206662	-4.65295551347261
O14618	CCS	-0.0934567907131652	3.36245445629039	-2.19774024076203	0.0744091241889111	0.425923486954603	-4.65385373299815
P38935	IGHMBP2	-0.102997873845006	3.34191588083127	-2.27233971769789	0.0674401092391534	0.410999468998721	-4.65487062791184
A4UGR9-8	XIRP2	-0.169847544485456	3.2533189833493	-1.51816931724762	0.184189548530677	0.592465458820377	-4.65487565910101
P26196	DDX6	-0.108617843964107	3.35373639579887	-3.14358192416118	0.0224610561637335	0.261636825179608	-4.65606361381627
Q16762	TST	0.148777897660677	3.36115457460412	2.12539759269737	0.0818897500629628	0.44173736526193	-4.65648688546466
Q96EI5-2	TCEAL4	0.107206358272446	3.13187805759954	1.99772061072513	0.0970555227718437	0.473101685331641	-4.65694208168945
P16035	TIMP2	-0.121282337663076	3.39652908273297	-2.21561497978084	0.072673163139241	0.420765721465958	-4.65843521241943
O43809	NUDT21	-0.08827614001961	3.39450330089429	-2.41879097655874	0.0556859291499834	0.374320815746189	-4.6584845028255
P53621-2	COPA	0.0354401842307102	3.35795171288063	3.26875294860196	0.0193511144131205	0.248991104520538	-4.65920668310654
Q9Y3Q3	TMED3	0.110079676795941	3.23788233870631	1.97877412101314	0.0995409857309943	0.47793730240827	-4.66196015304346
Q8TF05	PPP4R1	0.0618012174689678	3.31527154641904	2.49538591166478	0.0504249291614965	0.354928140129403	-4.66275899092177
Q7Z7K0	CMC1	0.140310362009526	3.32270776815307	2.00556961439466	0.0960445839799464	0.471098428120241	-4.66288931111922
Q96AC1-3	FERMT2	0.107732803323745	2.6315566448886	2.22969753406529	0.0713354066821588	0.418626338101832	-4.66550020810014
Q9C073	FAM117A	-0.119614015047488	3.29794451109934	-1.79205704741808	0.127781422721001	0.521521993643332	-4.66687431925258
P26641-2	EEF1G	0.0408013649639909	3.32482669482261	3.18753907917389	0.0213098634309792	0.258264165496019	-4.66982907665564
P45877	PPIC	0.111973690790126	2.62859724088505	1.99499353119354	0.0974093153515304	0.473917392263933	-4.67066409042841
Q5T280	C9orf114; SPOUT1	-0.115888071847516	3.33958717423011	-2.10328972594505	0.0843288543708657	0.449530974687517	-4.67148501681653
Q15390	MTFR1	-0.130712364285204	3.20940419522573	-1.76708672492527	0.132125249582275	0.530403420426105	-4.67403525480499
P08708	RPS17; RPS17L	-0.0740629805081459	3.31006238604866	-2.94753559723708	0.0285032718308033	0.285968646636806	-4.67448357552579
O75306-1	NDUFS2	0.237354085531103	3.36026610804229	2.77494038207164	0.035320618908115	0.310765968979515	-4.67941952422342
O95786	DDX58	0.165014645367975	3.32446422000472	1.61236840855915	0.162485767409748	0.565087421070257	-4.68356687306767
P48060-1	GLIPR1	0.0982959283734037	3.42996529215418	1.92439883155222	0.107041537157277	0.49031238448439	-4.68501071369027
P49418	AMPH	0.168702204256716	3.14389501402675	1.75618445207563	0.134067623236694	0.532890148568462	-4.6856875297075
P20340-2	RAB6A	0.0722588196759115	3.3355153498855	2.31960475235967	0.0633830122700036	0.398559970513531	-4.68726555286905
Q8WVQ1	CANT1	0.116827907376476	3.2725733176016	2.27600252781994	0.0671161210904176	0.410560136745603	-4.68978149266031
P63104-1	YWHAZ	0.0681675353706152	3.32444546307922	2.87807067829977	0.031056573075655	0.295427620180895	-4.69041130666043
P34910-2	EVI2B	0.0970043558923186	3.43678325294635	2.25413864686367	0.0690746585665259	0.413468363058133	-4.69102010026438
Q9Y277	VDAC3	0.24785571418001	3.21507003864922	2.69020186936314	0.0393027797886946	0.326275047352658	-4.69104073829523
Q14240-2	EIF4A2	-0.111756261063451	3.39689337137437	-2.68915488841703	0.0393549313748141	0.326275047352658	-4.69168511465649
Q6P1L8	MRPL14	0.17733014619156	3.30032888049385	2.3100068859439	0.0641855093281747	0.402852468444435	-4.69212497973549
P52732	KIF11	-0.10951183218465	3.23779458994291	-2.84765382109875	0.0322525700171298	0.299423036123701	-4.69331927160221
Q86WR0	CCDC25	0.145941946425702	3.34852587931993	2.59473972987851	0.0443803999806076	0.344779583214399	-4.69353536113837
Q9P219	CCDC88C	-0.0737261057141747	3.37021777881785	-2.52973049926542	0.0482410148911017	0.350948162443707	-4.69813519852177
Q3SXM5	HSDL1	0.104168061226432	3.17823566987539	2.04894337232451	0.0906499871009723	0.461431402796698	-4.69856502527213
Q9ULC5-3	ACSL5	0.0750958565031412	3.35930527843195	2.26529950986927	0.0680674744853729	0.412206813955565	-4.69946416405055
O15226-2	NKRF	-0.0457311058344286	3.2148147639693	-2.80088583537302	0.0341908193199032	0.306181616988054	-4.70244487726839
Q6XUX3-1	DSTYK	0.216431402458063	3.28834743301146	1.25995981049558	0.258508800215398	0.657596525585684	-4.70596111187157
Q5R372	RABGAP1L	0.086445968007398	3.37680264219244	2.56282104147523	0.0462326418396857	0.348893571904274	-4.71021974400811
Q9BWL3	C1orf43	0.100369393002076	3.29900798523856	1.8880782036413	0.112369619510005	0.49563555272064	-4.71207685692913
Q7L591-1	DOK3	-0.104076647141975	3.39257864599586	-2.05087519655019	0.090417103573506	0.461431402796698	-4.7146757511177
Q96PV7-1	FAM193B	0.174428248885348	3.35290114248768	1.98377417690872	0.0988787971477147	0.477214559177635	-4.71542511952485
O95997	PTTG1	-0.176454925073657	3.27647722605857	-2.14736776476593	0.0795383998838619	0.438963156009294	-4.71916617759396
P22415	USF1	0.088020215780994	3.3351418830396	2.09106042020161	0.0857103416586875	0.453300485153184	-4.72288484612056
Q9BPY3	FAM118B	0.152216922255862	3.37364568158499	2.16465522326203	0.0777376966154262	0.433765838722555	-4.72533259130079
Q9UBK8-1	MTRR	-0.0905178393699654	3.33863024055939	-2.18949463707361	0.0752245005187936	0.426788535511973	-4.72549082579903
Q99081-3	TCF12	-0.106531640278517	3.19260664033996	-1.7730113787528	0.131081466913407	0.528889328086387	-4.72597406870942
O94822-3	LTN1	0.0552109170148072	3.33381956825186	2.77102374636021	0.0354946741916288	0.311481984224712	-4.72751613266496
P49736	MCM2	-0.0625848522149008	3.3286552664771	-3.10939732711673	0.0234039374742362	0.265070049067139	-4.72981927602025
Q9BX66-12	SORBS1	-0.190074640687443	3.1502770693693	-1.27070554286017	0.254936770900883	0.656835942505073	-4.73153069404779
Q9NNX1	TUFT1	0.167836958878892	3.37479946920002	1.65423644613144	0.153653156121683	0.549684148722699	-4.73288578472803
Q7L9L4-2	MOB1B	-0.0790242423128668	3.34269464826438	-2.53869056870359	0.0476881054495118	0.350338191072807	-4.73319859106538
Q9H0U3	MAGT1	0.107123843007541	3.28843160470037	2.17010581220598	0.0771788071644463	0.431969976485768	-4.73373973868551
P30622-3	CLIP1	-0.0708453596765505	3.29392604576242	-2.64864787736646	0.0414313302360328	0.335140074424323	-4.73424108615115
Q75QN2	INTS8	0.0918341359594954	3.30161906351784	2.26361061846904	0.0682188864718533	0.412524403513377	-4.73453784863463
Q5BKY9-1	FAM133B	-0.148963065071993	3.32947153877575	-1.70109714023562	0.144323386776404	0.545943616157001	-4.73539046494341
P55196-5	MLLT4; AFDN	0.117828533268461	3.07375412733872	1.86109313250561	0.116501405328755	0.500506261221513	-4.73552658786832
Q9UL18	AGO1; EIF2C1	0.0982066137203696	3.31377578815217	2.36306249670925	0.05988006309078	0.385919256084586	-4.73707702533363
Q16527	CSRP2	0.313683408042612	1.72002121611356	1.97021754434477	0.100684730957305	0.478644102896043	-4.73896155591335
Q15834	CCDC85B	-0.148442536799837	3.13957557031117	-1.62376838479716	0.160033011545099	0.561010812811532	-4.73921094058064
O00629	KPNA4	0.0501837867933284	3.36127745972351	2.54754093272783	0.0471486430668945	0.349581915327794	-4.74405405727606
P22102-1	GART	-0.0602161991587775	3.33391742936639	-3.19787037362566	0.0210488857537669	0.257255654612402	-4.74409008133884
Q02223	TNFRSF17	-0.106645399265096	3.4237417715905	-1.89226935202234	0.111741320055584	0.494161285140549	-4.74612427875504
Q99986	VRK1	-0.0600108323755408	3.2339361805808	-2.53464059824759	0.047937174186549	0.350497604810886	-4.74644582246597
A2RU67	KIAA1467; FAM234B	-0.11257238860818	3.31779533996094	-1.9347943667829	0.105564302490847	0.487030364683234	-4.74664606742451
P33897	ABCD1	0.116590083614391	3.32428217354998	1.90748646164276	0.109489869927877	0.492247105154085	-4.74747532920337
Q14683	SMC1A	0.0840893207832457	3.30571794619317	3.1870028489133	0.0213235066721646	0.258264165496019	-4.75005535077585
Q9Y2G2-5	CARD8	-0.109090437961591	3.31496778645279	-1.8839654717252	0.112989638781563	0.496893719095826	-4.75128820323566
Q7L590-1	MCM10	-0.131457562806909	3.09912087425629	-1.57958841708007	0.169743159641884	0.573661900006406	-4.75615133175235
Q9Y6G5	COMMD10	0.0867866210686429	3.41951121854838	2.26266268347524	0.06830402575281	0.412524403513377	-4.75763487987702
Q9NW64-1	RBM22	0.109954544908892	3.27996188458332	2.47605697382371	0.051700413262194	0.359974881568922	-4.75865792368322
P23610	F8A2; F8A1; F8A3	0.108111204259663	3.35480678015385	2.07322352269078	0.0877674507674728	0.458053419300428	-4.76090652468098
P46531	NOTCH1	0.0717181966764439	3.37011889499279	2.20615575709234	0.0735864771650427	0.424226671958334	-4.76463546072134
Q96JC9	EAF1	-0.214497456147129	3.26137552141958	-1.98265958886544	0.099026017414597	0.477214559177635	-4.76478714646447
Q01850	CDR2; LOC101060399	-0.117711874846445	3.16293489126735	-1.86321321989918	0.116171310170222	0.500506261221513	-4.77130033789785
Q9NSY2	STARD5	0.222096255524192	3.47236305528336	2.09581508108414	0.0851704638685622	0.451867291337391	-4.77364035522721
Q5T124-1	UBXN11	-0.149338720647391	3.34992967450034	-1.48662259461877	0.192058502060744	0.599915079392342	-4.77403137583806
Q96ED9-1	HOOK2	0.242192543957608	3.32826547544316	1.13218758763391	0.304494223604872	0.70216097806515	-4.77511951610568
Q6PII3	CCDC174	-0.0816413907469507	3.3092442197172	-2.10022420459157	0.0846729697791572	0.45029406871479	-4.77955105639417
P06865	HEXA	-0.0635496339856495	3.34594606207527	-2.49824496684749	0.0502391434456121	0.354928140129403	-4.78089739510075
Q96E39	RBMXL1	0.109319177691983	3.32515976863065	2.01363467545684	0.0950170709415791	0.469565501763298	-4.7821826087875
Q9UQ84-1	EXO1	-0.0875677139818346	3.23901719637886	-1.97196855071794	0.100449587766602	0.478644102896043	-4.78509682394569
P23528	CFL1	-0.122159547434912	3.36039765241792	-3.15338925137317	0.0221983654615806	0.259924995671717	-4.78516765210284
Q9H098-2	FAM107B	-0.126265207189869	3.34618379719515	-2.27072500057554	0.0675834593673599	0.411127614359632	-4.78561513659825
P11047	LAMC1	-0.11961109606457	2.71518346477062	-1.91965224626425	0.107723013394843	0.49125786705572	-4.78571998795335
Q9H078-2	CLPB	-0.112751149550545	3.2794256930382	-2.50391209620449	0.0498730488604928	0.354928140129403	-4.7859772549697
Q9H4I2	ZHX3	-0.0880395466674049	3.29717104597466	-2.01734235625574	0.0945484962267133	0.469054279061769	-4.78996605126709
P13612	ITGA4	0.0553824462037903	3.39576467978639	2.63499770756483	0.0421575007049409	0.339787433739344	-4.79071896298719
Q12797	ASPH	-0.105556079571392	3.32940106618496	-2.30456009786946	0.0646456956190642	0.404774976411013	-4.79130833690978
Q10471	GALNT2	-0.0695675058914586	3.33360566753618	-2.65494140588687	0.0411010884914312	0.33407680391705	-4.79274673209354
P51606-1	RENBP	-0.12151577184914	3.40826296694183	-1.872205334621	0.114781704389506	0.499965389993023	-4.7931932101469
Q8IVG5	SAMD9L	0.0673624194621553	3.40886824319777	2.80314425836264	0.0340943555795373	0.306181616988054	-4.79471931546194
P82979	SARNP	-0.0645026693794685	3.300185275114	-2.57168733240803	0.0457099227462646	0.346796953386445	-4.79480126193649
Q9BYT3-1	STK33	-0.0812890793772849	3.34437273846543	-2.19364184391462	0.0748132370917962	0.426181847229707	-4.7976514151323
Q8NCM8-2	DYNC2H1	0.0950432136194321	2.3767490098096	1.9296011117585	0.106299668328591	0.48933331099782	-4.80057371205514
P38398-7	BRCA1	-0.0684172497901498	3.23776137815475	-2.26307049145228	0.068267384565276	0.412524403513377	-4.80084768962195
Q9Y2Q5-2	LAMTOR2	0.060702181407572	3.40039756328073	2.2923363765179	0.0656911790118332	0.406895202351148	-4.80204069377658
O94979	SEC31A	0.0359491754598392	3.38027522215813	2.95474758084547	0.0282516690556324	0.285137029300641	-4.80336043132508
O75380	NDUFS6	0.15435874735355	3.33012004345646	2.21307775599929	0.0729169673725164	0.421326929753712	-4.80522542948316
Q13889	GTF2H3	-0.0880086813748756	3.26378766495986	-1.91119745118982	0.1089478208123	0.492247105154085	-4.80689622096836
Q9UL26	RAB22A	0.0694552212627044	3.36255217603879	2.12001753666442	0.0824764923345314	0.442463672364501	-4.80758005739495
P08174-7	CD55	0.171813698020753	3.32516749417042	1.58418901712571	0.168706024198706	0.573151941396041	-4.80851070873362
Q9H7E9-2	C8orf33	-0.0909099380147675	3.29020654516574	-2.08435097862434	0.0864782158304155	0.455488672848916	-4.80892917275739
Q9Y2K1	ZBTB1	-0.131229559587459	3.38042331545819	-1.80054879387527	0.126336914631863	0.518776261548797	-4.81004914029372
Q9Y512	SAMM50	0.160311258526979	3.24213641621649	2.38691539252971	0.058045181639688	0.380664306792202	-4.81073672879826
Q9UDV7	ZNF282	-0.13297515600722	3.30896683006773	-1.51602840964195	0.18471373252896	0.592465458820377	-4.81114696729161
Q13501-1	SQSTM1	-0.0999290010359999	3.39953526759403	-2.7775439831036	0.0352054292245262	0.310158447244122	-4.81133322030315
P32969	RPL9	0.0433564637562405	3.32939536229183	2.75316814252919	0.0363000932722794	0.314040189158639	-4.81191942724623
Q86Y79	PTRH1	0.144688307129644	3.38775577860732	2.0172665899123	0.0945580477328439	0.469054279061769	-4.81487435315171
O43325	LYRM1	0.132264924689615	3.3629830560206	1.80844970874802	0.12500757864518	0.51719181157506	-4.81577557635578
O15294	OGT	-0.0745843725823072	3.30607869373122	-2.659167124572	0.0408809498048225	0.333291357223689	-4.81585673286621
Q9NT62	ATG3	-0.096356174252505	3.34654390562163	-2.24420855612112	0.0699839538953949	0.415294218927159	-4.81640912679652
O15516	CLOCK	0.112890018816547	3.32730474377546	1.74783306743739	0.135574691572772	0.533255164863764	-4.81653156575286
P24539	ATP5F1	0.306814139439044	3.15345251309086	2.3791425110991	0.0586364614642047	0.382743317388054	-4.81720496134212
Q9C0J9	BHLHE41	-0.0767422233328297	3.40641838311991	-1.99291632434943	0.0976796847606276	0.47476705781702	-4.81778752863861
P80303	NUCB2	0.0517211730223199	3.25114832143552	2.46415594770075	0.0525028789310961	0.362345330774977	-4.81902351994105
O00746	NME4	0.113525165293015	3.27111873825404	1.85950018705272	0.116750047247148	0.500506261221513	-4.81987404464343
Q13492-1	PICALM	-0.0509219336108467	3.35484035230426	-2.51761386457292	0.04899968184336	0.3531439880517	-4.82370254767262
Q9BSL1	UBAC1	0.142292953896884	3.3154625759356	1.99093853129341	0.0979378292513963	0.474991405647826	-4.82382240676629
O43505	B3GNT1; B4GAT1	-0.157543128243574	2.67128705832713	-1.45124699693137	0.20126042143205	0.6089439564885	-4.82445099148524
P16383-1	GCFC2	0.16296749081462	3.0849198094223	1.99504498750423	0.0974026275391088	0.473917392263933	-4.82477664881218
P43378	PTPN9	0.101506405455741	3.17633199983663	1.94637698675454	0.103942802060409	0.483616400185318	-4.82548472746247
Q9H204	MED28	-0.151863956920864	3.27738876627813	-2.0966110468026	0.0850804291755167	0.451746165021977	-4.82600938189596
Q9H446	RWDD1	-0.166707588134728	3.35796452392503	-2.16863279423937	0.0773294319246302	0.432452946254047	-4.82666195643635
Q01974	ROR2	0.107872575781271	3.29838917497888	1.73677959336185	0.137595242198752	0.535561793896938	-4.82705668623447
Q71F56	MED13L	0.127715855589769	3.32557323845027	1.82451873248711	0.122347008927816	0.513173438491011	-4.82724548018002
Q16774-2	GUK1	0.0601789771672928	3.39283977065435	2.47543198044645	0.0517422275011298	0.359974881568922	-4.82894329655789
Q9Y3E1	HDGFRP3; HDGFL3	0.138324868718051	2.59783947656213	1.55931530671358	0.174387033543167	0.580720992534269	-4.82979574820729
Q14146	URB2	-0.0667496510450421	3.27740987669031	-2.59262862244549	0.0445004053077108	0.345019290055861	-4.83785481294833
P49888	SULT1E1	0.121539339302825	3.53116241023174	1.87914768095865	0.113720352072354	0.497674613691644	-4.83796936575934
Q13243-1	SRSF5	-0.0807256406354569	3.24520559685616	-2.15470672255799	0.07876870260577	0.436147626784173	-4.83964281825722
Q9Y6K9-2	IKBKG	-0.0872423732297004	3.33334805194802	-2.29048082504834	0.0658514361112132	0.406895202351148	-4.84000694752982
P41236	PPP1R2	0.0981889949563103	3.38503022831319	2.28279945920344	0.0665192470948004	0.409096412599495	-4.84021626577073
P40818	USP8	0.0639023949853732	3.37999164156403	2.63049139129449	0.0424002412624993	0.340077141862041	-4.84556628357227
Q9Y2R5	MRPS17	0.132671454606847	3.28900791662282	1.74048286625191	0.136914989005521	0.53415122234191	-4.84637734089304
Q9NP50-1	FAM60A; SINHCAF	-0.131078322603142	3.21461726341938	-1.86044094519117	0.116603140251511	0.500506261221513	-4.84831157434916
P06400	RB1	-0.0906526258839934	3.29508770790744	-2.57652458475508	0.045427423708701	0.345043098497049	-4.84937826524221
Q9H9V9	JMJD4	-0.10431373935289	3.27330492240099	-1.68871826022202	0.146732477744335	0.547180403082038	-4.85056383211573
Q15397	KIAA0020; PUM3	-0.105416852961543	3.31250361633021	-2.36161198214426	0.059993611982709	0.386280708570661	-4.85121563561711
O15160	POLR1C	0.149859194136037	3.27574369540845	2.27713135391159	0.0670166034336696	0.410560136745603	-4.85239473694755
Q00534	CDK6	-0.0892608623249851	3.27683303443323	-2.2365252476519	0.0706961402586655	0.417591788065685	-4.85259243345851
P12259	F5	-0.08133099401386	3.52951032820556	-2.44424399864132	0.0538754229259725	0.369540218434847	-4.85398854897839
O14713-1	ITGB1BP1	-0.14971137402342	3.3881916824874	-1.65846287963281	0.152787999180389	0.549684148722699	-4.85494717552409
Q12905	ILF2	-0.0636908550583955	3.24827015190681	-2.70544188104111	0.0385520770488815	0.325264099426568	-4.85503691849758
Q6ZRP7	QSOX2	0.0783231242502866	3.28010998843969	2.29685438288246	0.0653026939645541	0.406573454911661	-4.85508195382595
Q66PJ3-1	ARL6IP4	-0.155033185371724	3.20850379566004	-2.04993640808496	0.090530198384273	0.461431402796698	-4.85562729197988
P61353	RPL27	-0.150909868281876	3.27296794411409	-2.49053070938368	0.0507421155278465	0.356414316173651	-4.85732127995033
Q14493-1	SLBP	-0.0705228174694058	3.37467678157507	-2.22828271920898	0.0714686305004402	0.418626338101832	-4.86018074966968
P45880-2	VDAC2	0.227481704565245	3.10507435965075	2.69636069576166	0.0389975126031353	0.326275047352658	-4.86080581198256
Q9BU02-1	THTPA	-0.124070386641245	3.29166896906558	-1.96513917081454	0.101369894338043	0.480541910959329	-4.86144879959209
Q93086-4	P2RX5	-0.143442540975522	3.35237101638503	-1.53348294454434	0.180481265580158	0.587366306081329	-4.8641576917181
Q6GMV3	PTRHD1	0.19775114566833	3.383060733623	2.13279671181846	0.0810898890943776	0.441656740715411	-4.86596240452651
Q92620	DHX38	-0.154898762764115	3.26946481859782	-2.50228593901558	0.0499778047000025	0.354928140129403	-4.86618864544937
O43169	CYB5B	0.119333305631015	3.21413777551211	2.26828119961088	0.0678010239497097	0.411882104859012	-4.8669353553622
Q96EX3	WDR34	-0.108339387536966	3.17838102692032	-1.83342150279708	0.120897492171658	0.510321594490244	-4.86838089943092
Q9Y6W5	WASF2	-0.0663556131782324	3.39454842451734	-2.34122990203272	0.0616135308306347	0.392574553785333	-4.86914382242015
Q8N3Z3-1	GTPBP8	0.174037984437212	3.30835348843124	1.4783961186149	0.194162270445521	0.603123281855265	-4.86958721468634
O75381-1	PEX14	0.120524717834649	3.28919407559829	2.29779273386319	0.0652223134839196	0.406573454911661	-4.87193831238203
Q9NUD5	ZCCHC3	-0.111070230655041	3.19335735580657	-2.01629165853169	0.0946810412500309	0.469054279061769	-4.87254916204159
Q8IZE3-2	SCYL3	0.0672728995547379	3.38742482946217	2.1239856095141	0.0820433181651573	0.44173736526193	-4.87284011305378
Q9BUT1-1	BDH2	0.0849754099678485	3.22855039182829	1.83322142222894	0.120929878375693	0.510321594490244	-4.87597736057595
Q15545	TAF7	-0.0942631130396588	3.31792676579108	-2.14117474783033	0.0801940068036495	0.439571288174024	-4.87607780818671
Q96F46	IL17RA	-0.156067712267899	3.21183450621553	-1.36318233244164	0.22598938239901	0.63138014484046	-4.87870004908344
Q9BSG0	PRADC1	0.113615849777113	3.35712253671218	1.69299718614292	0.145895302434724	0.546308516636974	-4.88242989086497
Q2TAA2	IAH1	0.125433778851716	3.40932342021321	1.56363196288973	0.173388109564554	0.580414890852953	-4.88281049398601
O00399	DCTN6	-0.139463816037937	3.32819690347199	-2.00626777949108	0.0959551863386571	0.471098428120241	-4.88362895709458
Q9HBL7	PLGRKT	0.154152412438476	3.33817822919682	1.64486948685264	0.15558767807274	0.552488310620687	-4.88628779992154
Q9NR56-1	MBNL1	-0.0776589627123741	3.35706264224505	-2.12366484919783	0.0820782459405163	0.44173736526193	-4.88631222884539
Q5SNT2-1	TMEM201	-0.18964153863694	3.18301455820451	-1.51616563442624	0.184680091586171	0.592465458820377	-4.88638463050658
Q14153	FAM53B	0.192254596851265	3.35469026076141	0.742678399586754	0.488171155432187	0.808027086926818	-4.88750422338519
Q53GL7	PARP10	-0.0927607018714546	3.41727003398358	-2.24750323721684	0.0696808740977123	0.414875850916583	-4.88932456696272
Q15532	SS18	-0.100387182519827	3.31517167904476	-2.22644790105239	0.0716417922294355	0.418626338101832	-4.89154774515413
Q15797	SMAD1	0.0891158266146212	3.37300721244789	1.84687697404022	0.118739400058144	0.505277964465503	-4.89220117955964
O00148	DDX39A	-0.0644291773913601	3.346663149537	-2.60792379662999	0.0436388045531292	0.343800486350461	-4.89269727139614
P78345	RPP38	-0.0994184875317888	3.27937066086706	-2.10093903183378	0.0845925979818469	0.450222837398238	-4.89478255704615
Q5VWQ8-1	DAB2IP	-0.142386049897674	3.02816261856592	-1.36905570208287	0.224256334753976	0.629153206267208	-4.89534951085078
Q9BTV6	DPH7; WDR85	-0.123969022625794	3.25158041986605	-1.70517796889938	0.143537771103999	0.544811348029971	-4.8967358075884
P38919	EIF4A3	-0.0524486587172459	3.28019877970154	-2.84585834815305	0.0323247257335131	0.299423036123701	-4.89707297022655
P35914	HMGCL	0.0932967241636317	3.41061160099932	2.22908270420529	0.071393269122482	0.418626338101832	-4.89849368591291
Q9Y3L3-1	SH3BP1	0.0511758374130438	3.34476702526751	2.46509706594456	0.0524389385839608	0.362275997082615	-4.90217246773684
P15884-2	TCF4	-0.0964043198098799	3.38370779534622	-1.73509850396635	0.137905144873374	0.536147127726329	-4.90238650894409
Q96DA6	DNAJC19	0.175502682524064	3.34665131826164	2.25914213709419	0.0686212056304383	0.412955903534294	-4.9027327903809
Q5VV17	OTUD1	0.132135854116752	3.34061191150762	1.45191428192149	0.20108307116452	0.6089439564885	-4.90662092284176
O75503	CLN5	0.0857178359752625	3.31944410500467	2.12644083439833	0.0817764784303874	0.44173736526193	-4.90708855428323
Q63HM1	AFMID	-0.137842290419637	3.41441181908841	-1.76445744767952	0.132591111533813	0.53178845568633	-4.90726697717161
Q5THK1-1	PRR14L	0.0949298245159577	3.21310918302037	2.13685691099376	0.0806544294540218	0.440064184082739	-4.90758437686238
Q9BZJ0	CRNKL1	0.0538681854688746	3.32145964118829	2.51577343173517	0.0491160336219475	0.353488199150676	-4.90946245990622
P04350	TUBB4A	0.148083533526349	3.10499510433699	0.64222347009317	0.546546417317808	0.834784143878734	-4.91026444725953
P36405	ARL3	-0.0638817021781428	3.34332350170305	-2.42452180835678	0.0552727028940553	0.373035249853253	-4.91072130553311
P35222	CTNNB1	-0.121438235813137	2.6918181221256	-2.06038133251232	0.0892800878363321	0.460583845307617	-4.91086886753588
Q9HCG7	GBA2	0.0627827962141294	3.36218851524061	2.17556462417545	0.0766232769191587	0.429918733568019	-4.91137764200135
Q8IZQ1-1	WDFY3	0.108942947621257	3.19663754369348	1.53533531857368	0.180037564709969	0.586911983501656	-4.91272950469288
P52292	KPNA2	-0.0972389785289243	3.07506058420769	-2.41272315542186	0.0561270441230335	0.375053926324511	-4.91341498050544
O95980	RECK	0.160553834322982	3.3648468147783	1.16384906680015	0.292481353526681	0.690003214397725	-4.91407054650807
Q6PJ69	TRIM65	-0.10426759542751	3.33559839819345	-2.04886741095995	0.090659156957037	0.461431402796698	-4.91484655333104
Q9UET6	FTSJ1	-0.110070150703889	3.2931456078478	-1.95543628837434	0.102692258951216	0.482623168725667	-4.91582643304751
P62191	PSMC1	-0.0431380898160653	3.33843079144099	-2.78016383534261	0.0350899333674116	0.309546630046904	-4.91655160151928
Q13505-1	MTX1	0.108393017141063	3.25385252923925	1.97094417418407	0.100587083379734	0.478644102896043	-4.91756254278838
Q86XK3-2	SFR1	-0.133294849158298	3.27967245715186	-1.73533275689703	0.137861919790003	0.536147127726329	-4.91810641676489
Q9BY89-1	KIAA1671	0.147855061632449	2.75214999759217	1.0962173161297	0.31865174629704	0.712019782317733	-4.91953401886913
Q8N5J2-3	FAM63A; MINDY1	0.146914267793484	3.38979230303937	1.05532593961376	0.335416940927917	0.722764803834524	-4.92036898892559
Q9BRT2	MNF1; UQCC2	0.16024066852745	3.31862186871328	2.11573490208427	0.0829466723379305	0.44452431538112	-4.92131143480858
Q8WUF5	PPP1R13L	0.0787974139800013	3.3474894396725	2.07400328409755	0.0876764626533003	0.457934096313508	-4.92490910467522
Q68CZ1	RPGRIP1L	-0.111976115242912	3.28839909826497	-1.66722370642508	0.15100979358973	0.549680798221171	-4.92708390927799
O43353-1	RIPK2	-0.0963528917178641	3.2768514298308	-1.74957940306514	0.135258168231305	0.532945725000488	-4.92766102806135
P55789	GFER	-0.0991958430225262	3.32728735155821	-1.93794179260007	0.105121148357815	0.486778165684497	-4.92811036216872
Q14141-1	SEPT6	0.0889446931864518	3.39575350597688	2.46656650947059	0.052339269771717	0.362275997082615	-4.92853592832804
Q9BRT9	GINS4	-0.080626031506448	3.09698446243073	-2.14024003677544	0.0802934450538994	0.439571288174024	-4.93008602445193
Q969R5-1	L3MBTL2	-0.0688323472907556	3.29627341224688	-2.18936701792893	0.075237193481358	0.426788535511973	-4.93048271154183
Q9Y2Z9-1	COQ6	0.0831007065238435	3.31002194252785	1.80765446823637	0.125140742619357	0.51719181157506	-4.93051018426234
Q96PY5-3	FMNL2	0.104054270609285	3.31376254988652	1.71432410854281	0.141792293500296	0.541731482539062	-4.93081553849656
Q14CB8-2	ARHGAP19	-0.145326634261026	3.24408505212051	-1.21083348588204	0.275412611528153	0.673208572615363	-4.93103951168727
Q9P202-1	DFNB31; WHRN	-0.0943808874253838	3.36887589829968	-1.6573418374636	0.153017012931765	0.549684148722699	-4.93109903744607
Q9NQR4	NIT2	0.108306027873731	3.36888073979705	2.49714994161006	0.0503102130499173	0.354928140129403	-4.93568540600225
P83111-1	LACTB	-0.116571988756829	3.44872075479818	-2.37077006667974	0.059280514193415	0.384265782457218	-4.93590112247472
Q6AI08	HEATR6	0.12556341504594	3.01324292000494	1.53688101426036	0.17966812089223	0.586561004680704	-4.93732039711013
P07858	CTSB	0.0830741417133064	3.37003508360561	2.54114165467476	0.0475380418293498	0.349778630394051	-4.93848329412616
Q96TA2-1	YME1L1	0.18981418419953	3.13968683934677	2.14342378884318	0.0799552699200205	0.439571288174024	-4.93921729334248
P48539	PCP4	-0.0911580189069307	3.42266277612126	-2.22430029445376	0.0718450327957205	0.418626338101832	-4.94317721314386
P42858	HTT	0.0588076094274412	3.30978602687564	2.6844245095142	0.0395914949127565	0.326945981331142	-4.94372032223129
Q16204	CCDC6	-0.05023809442749	3.25702570430128	-2.38992369596113	0.0578180450143184	0.380664306792202	-4.94617680459015
P04424	ASL	0.0758620196838629	3.42175885580054	2.35860281525208	0.0602299041130535	0.387360600137765	-4.94671899421891
Q5T6S3	PHF19	0.146364515069551	3.31152698737837	0.697391889218927	0.513940992016649	0.818548754734436	-4.9471121760571
Q96B36-3	AKT1S1	-0.101250182994896	3.29636635453763	-1.51297513037015	0.185463760750459	0.592812701587832	-4.94773468003789
Q14978-2	NOLC1	-0.0648510525608368	3.30368450074771	-2.86115047335639	0.0317157744019629	0.297886827341474	-4.94783346167807
P15291	B4GALT1	0.119906785245521	3.3504788457693	1.77132349620931	0.13137799248217	0.529681958681794	-4.94800237941793
Q9H920	RNF121	0.107658835094516	3.27723226949307	1.70580290653051	0.143417834658236	0.544748750729115	-4.9481628056993
B2RTY4-4	MYO9A	0.134328663035579	3.28405078945601	1.20743296852952	0.276618029486262	0.673949399857431	-4.94857593186067
Q7Z6I8-1	C5orf24	-0.117518735706908	3.22121223020492	-0.515097488528667	0.626520755586932	0.873203112679854	-4.94891982634258
O75061-2	DNAJC6	0.0925084266177378	3.06319029916239	1.85974000000477	0.116712580802679	0.500506261221513	-4.94964622349395
P15311	EZR	-0.113534237179066	3.3693489509744	-2.57985239999068	0.0452341686578423	0.345043098497049	-4.94964677630538
Q9UH65	SWAP70	0.0823330571567414	3.23747995004316	2.06216964618354	0.0890678448412943	0.459841822598449	-4.95223350303917
Q13148-1	TARDBP	-0.0736162004177827	3.24524734843028	-2.52461771135131	0.0485595966542357	0.351743112833806	-4.95339205035211
P16284	PECAM1	0.0828258675038456	3.45072707995689	1.95319493512454	0.103000218862118	0.482623168725667	-4.95376127668383
Q9GZT5	WNT10A	-0.138142655813234	3.45591551471309	-1.43376321725678	0.20595983750586	0.609684268409231	-4.95692686124084
Q8NFH3	NUP43	-0.0627398640432782	3.26730943828676	-2.16484484038383	0.0777181830270525	0.433765838722555	-4.95786773838463
O43670-4	ZNF207	0.0959448189426436	3.30808088911298	2.35104354864372	0.0608278535054037	0.389414125012689	-4.95961608353395
Q8IWB9-2	TEX2	0.0846213437154456	3.32927961662686	1.88927867739307	0.112189290686261	0.495258520571035	-4.95987117132571
Q9P0W2	HMG20B	-0.156724912494234	3.30594442033127	-1.58605091208497	0.168288028351486	0.572670583354394	-4.96026985419722
O00330-1	PDHX	0.120607268873357	3.33718420813613	2.12665154294849	0.0817536201886289	0.44173736526193	-4.96093120171916
Q9H3H1	TRIT1	0.114223061839023	3.34800296872533	1.53846964417091	0.179289170506078	0.586561004680704	-4.96141895441086
Q9H668	OBFC1; STN1	0.106933513477638	3.3502423765626	1.45168918832238	0.201142879887535	0.6089439564885	-4.96247548883635
Q6ZVM7	TOM1L2	0.106107976837777	3.2847157208526	2.02820210411941	0.0931896674236426	0.465048956512046	-4.96306184112418
Q5U5Q3	MEX3C	0.148594460825799	3.29755955166461	1.05788107623409	0.334348207159427	0.722432866771349	-4.96456951987024
Q6DKI1	RPL7L1	-0.0796444024303695	3.25600342823455	-1.87134973741385	0.114913199574416	0.499965389993023	-4.96559641752679
P98198-3	ATP8B2	0.134208518859763	3.370018195045	1.53893332436409	0.179178708820559	0.586561004680704	-4.96621452930958
P48637	GSS	-0.0525433192956753	3.31253016811556	-2.43305281485234	0.0546636110220764	0.371743599673863	-4.96631988543206
P60604	UBE2G2	-0.114058701729061	3.36371330700177	-1.98972747425579	0.0980962431897679	0.475416688335703	-4.96703712293863
Q9H3R5	CENPH	-0.0662914237041104	3.23977001832783	-2.12567454505192	0.0818596636282039	0.44173736526193	-4.96779109840604
O96011-1	LOC101060567; PEX11B	0.0957454364797489	3.34244954968012	1.97846496068668	0.0995820784413925	0.47793730240827	-4.97013711430025
A8K855-1	EFCAB7	-0.153231258530783	3.24784501796601	-1.27636581993037	0.253073045458042	0.655663080374676	-4.97029754352983
P56282	POLE2	-0.186238810316134	2.93332845324263	-1.30833969414079	0.242773479534539	0.646050407534115	-4.9711365177218
Q8TB40	ABHD4	-0.101150173355518	3.38663009020034	-1.7123792870244	0.142161687856808	0.542632767463511	-4.97286849000202
Q8WVJ2	NUDCD2	0.096380418268045	3.33581928323564	1.93565077149199	0.105443533630696	0.487030364683234	-4.97342243774032
Q8IUI8	CRLF3	-0.0775844795988588	3.3566390465584	-2.29273706981293	0.065656626670271	0.406895202351148	-4.97349186234078
Q9Y6I3	EPN1	-0.0797408949810764	3.34922369380854	-2.22602741129543	0.0716815380928272	0.418626338101832	-4.97372553820564
Q5JSZ5-1	PRRC2B	-0.0768655967711442	3.27439782645339	-2.57814697621566	0.0453330963023663	0.345043098497049	-4.97534876363501
Q5SY16	NOL9	-0.0838109616402984	3.24975396806726	-2.22605596532083	0.0716788383547735	0.418626338101832	-4.97561699230286
Q8WV92	MITD1	-0.103341134004931	3.33113492445917	-1.52959677637775	0.181415520004734	0.588705238053999	-4.97569064644418
Q8NC56-1	LEMD2	0.0881816261102213	3.24665065625066	1.83432058897105	0.120752068371055	0.510321594490244	-4.97677216331416
Q8IY47	KBTBD2	-0.114869389744337	3.2578761145406	-1.46690858218624	0.197136424333475	0.606339456466303	-4.97841220216928
Q9H8V3-3	ECT2	-0.0959921613166399	3.14377862014907	-2.04184340081244	0.0915112232385017	0.462858120849668	-4.97887266931051
Q6ZSJ8	C1orf122	-0.0803883928474116	3.32962782741457	-1.87489879400556	0.114368742824868	0.499600184875543	-4.98036136545659
P82650	MRPS22	0.146172452719234	3.33217253835331	2.36498554920601	0.0597298745182483	0.385919256084586	-4.98237398749445
Q9Y6M5	SLC30A1	0.0977712856659103	3.42583292245878	2.47480001696278	0.0517845448493228	0.359974881568922	-4.98424595871712
Q86UV5	USP48	0.0568072509339156	3.26905000726652	2.38821586905333	0.0579468752813183	0.380664306792202	-4.9853156976249
Q9Y2U5	MAP3K2	-0.114662668873415	3.37491085310534	-1.36666473141364	0.224960354839531	0.630076460513053	-4.9853705621092
P51617	IRAK1	0.091386375380268	3.31641556225161	1.8819819767139	0.11328989840252	0.496957530091708	-4.98562028078461
Q5RKV6	EXOSC6	-0.0786206855186113	3.22791102719247	-1.86497504256277	0.115897714211652	0.500506261221513	-4.98710994377089
Q15003	NCAPH	0.0472003391189051	3.25323416238365	2.4781431502441	0.05156110228356	0.359974881568922	-4.98864150812887
Q9H3F6-1	KCTD10	0.0740158604676273	3.34002907441509	1.95518324071866	0.10272698037395	0.482623168725667	-4.99099118472348
P42331-4	ARHGAP25	0.0546803231110226	3.41616222175707	2.58805588396699	0.0447615422641964	0.345043098497049	-4.99374588567899
O14578-4	CIT	0.051468178020285	3.05478454124936	2.230266824441	0.0712818739051571	0.418626338101832	-4.99494138521879
Q96RR1-1	C10orf2; TWNK	0.113471367466863	3.30680257495003	1.54525540756224	0.177679092024927	0.584695636035164	-4.99718738705719
P50583	NUDT2	-0.0642209717277984	3.3873443667272	-2.06437783971476	0.088806487847342	0.459551355896715	-5.00193470430362
Q9NPB6-2	PARD6A	-0.126179850057668	3.3763638758645	-1.6497167576226	0.15458363964162	0.551134578072868	-5.00420285788171
P33241	LSP1	0.181929181417618	3.43040105766184	2.25759077902471	0.0687614651683182	0.41342984692436	-5.00505106782998
Q9Y253-1	POLH	-0.0808563867633042	3.35248077907118	-1.7288376159766	0.139065407641224	0.537548976517715	-5.0078888476716
Q07666	KHDRBS1	0.0873884795711651	3.26327902166381	2.52134161127265	0.048764919449393	0.352092146658238	-5.0101327126229
Q9H1A3	METTL9	-0.103912097023053	3.20575611450747	-1.54664094859452	0.177352046608847	0.584106054534379	-5.01116559946048
P46776	RPL27A	-0.0813679232634023	3.28935651807429	-2.19382399627524	0.0747952277101056	0.426181847229707	-5.01149565228946
Q9NWS0-1	PIH1D1	-0.0984928300620251	3.31017930838795	-1.76876152259721	0.131829354208417	0.530403420426105	-5.01195412878076
Q86VP6-1	CAND1	0.0456321009102928	3.32909259990775	2.99749132062632	0.0268096684550812	0.276827329270439	-5.01498758986864
P0C1Z6	TFPT	-0.0906600754491638	3.29829286704434	-1.68523089145437	0.14741827515879	0.547180403082038	-5.01520344066247
P24666-1	ACP1	-0.0974232854723495	3.30559059018084	-1.68173558514521	0.148108792635574	0.547180403082038	-5.01573730626445
O75164-1	KDM4A	-0.0644461770294607	3.2882076805696	-2.18434056173981	0.0757389085308815	0.42854961544157	-5.01854694186925
P78316	NOP14	-0.0831816758489852	3.23020620196976	-2.19387122757939	0.0747905586973077	0.426181847229707	-5.02025355523533
Q9BRP1	PDCD2L	-0.120514358042249	3.28071456132149	-1.89532192382624	0.111285945400249	0.493561688805438	-5.02143520511101
Q86Y37	CACUL1	-0.10146629024341	3.30401770968163	-1.97330295781036	0.100270766847943	0.478644102896043	-5.0215627198655
P26368	U2AF2	0.0545129325675495	3.29775567687444	2.68574489926288	0.0395253083212641	0.326800888727598	-5.02166085442413
Q92187-1	ST8SIA4	0.069552049186567	3.39236816631088	1.92657706383275	0.106730272709619	0.490055254886652	-5.02382620501596
Q9BVL2	NUPL1; NUP58	0.0945048265975599	3.28522993065928	2.1256859092771	0.0818584293326834	0.44173736526193	-5.02468667294613
Q9Y5A7	NUB1	0.0545023221422552	3.25096845495405	2.17904459298262	0.0762713097521083	0.429034095526085	-5.02495255512776
O94829	IPO13	0.072441052693904	3.36546691507096	1.88913763466088	0.11221046218829	0.495258520571035	-5.02576407269476
Q6IPU0	CENPP	0.0761973405602382	3.25363934014545	1.87480354287277	0.114383321113279	0.499600184875543	-5.0260242985723
Q9Y2K6	USP20	-0.112686505406342	3.31690070153421	-1.453361946788	0.200698816763444	0.6089439564885	-5.02672608043755
Q9BSH4	TACO1	0.271929696830655	3.08207774645655	1.73939563200837	0.137114356495363	0.534618738028903	-5.0275013855858
Q9H0J9	PARP12	-0.0993201945263546	3.39686909089989	-1.45689738725192	0.199763300120105	0.608652523912135	-5.02766609614054
Q9H040-1	SPRTN	-0.114202510518613	3.15175626563598	-1.28287092879043	0.250946255870026	0.652704702710292	-5.03097092701255
P62380	TBPL1	0.134230620274357	3.21745000602233	1.56518620589338	0.173029787983745	0.579813676384213	-5.03128573863235
Q6BCY4	CYB5R2	0.0859851904209322	3.43751840008208	1.62672050744955	0.159403735732519	0.560121229270252	-5.03250988206448
Q5VT06	CEP350	0.0877708345578557	3.34160532027502	2.52232170620756	0.0487033965394933	0.352026055417714	-5.03265447501962
P0DOX5		-0.0900015474779323	3.42254729849444	-1.83758448724143	0.1202256207584	0.509556508662023	-5.03359146596215
Q8NCE2-1	MTMR14	0.159561277670315	3.3694731900029	1.8732593171646	0.114619928583072	0.499965389993023	-5.03422258374304
Q96L73-1	NSD1	-0.158168765717055	3.24784181928792	-1.48584521967562	0.19225637537311	0.600254229102669	-5.03490244118281
Q9Y243-1	AKT3	0.0863808487102433	3.19770940925676	1.80933728697047	0.124859120120253	0.51719181157506	-5.03544011415774
Q92613	PHF16; JADE3	0.094672026310389	3.09594846357802	1.66417608460408	0.151626066922183	0.549684148722699	-5.03564064866761
Q8NI08	NCOA7	0.0728894933410411	3.27899403623058	1.90981804831712	0.109148985892292	0.492247105154085	-5.0363940464637
Q9UPW0-1	FOXJ3	-0.0972627628595338	3.27464422998685	-1.81965494294391	0.123146267140694	0.513788872660651	-5.03751394612391
Q9Y3C6	PPIL1	-0.0728886143912747	3.28239758076333	-2.22290711166414	0.0719772012026792	0.418626338101832	-5.03792660268203
Q9BRJ7-1	NUDT16L1	-0.0906710211716957	3.37733709833991	-1.79066797896548	0.128019278761127	0.521818031578311	-5.03815760664316
Q96EP0-1	RNF31	0.0821211255229142	3.36612678012141	2.13229915134873	0.0811434208246849	0.441656740715411	-5.04246952633588
P48553	TRAPPC10	0.0487729601712062	3.36336486060828	2.28533241630212	0.066298248340161	0.408484716171001	-5.04260709459874
Q9NYR9-1	NKIRAS2	-0.102588438532759	3.29769273905577	-1.34510828195292	0.231399899270186	0.635664128685816	-5.04369260169591
Q86VX2-1	COMMD7	0.071024302242371	3.37175342496261	1.89939244710943	0.110681638373897	0.492286808962813	-5.0439892878862
Q9H2Y7	ZFP106; ZNF106	0.0906636107059198	3.26761717475178	2.06666150339499	0.088537031505739	0.458942057109055	-5.04591253997323
O60825-1	PFKFB2	-0.12827876607194	3.31649819765334	-1.47955810560476	0.193863798696582	0.602474551474075	-5.04876426332143
Q8TBA6	GOLGA5	0.0579773393352998	3.1029925790697	2.09295645588079	0.085494628598555	0.452830960843023	-5.04902300347133
Q8TER5	ARHGEF40	0.141742152761018	3.32146334148615	1.49203894219886	0.190685163298773	0.598228624300585	-5.04912105355083
Q86WB0	ZC3HC1	0.0831113859351217	3.28164158003369	2.4003824864465	0.0570356989593071	0.378473325856837	-5.05077764689408
Q9H5K3	SGK196; POMK	0.29792998937162	3.21110037713512	1.62485541632746	0.159801018992059	0.560930783114684	-5.05148596029369
Q13618	CUL3	0.0398496042499227	3.33502071000229	2.61718999642825	0.0431255907138504	0.34220786346348	-5.05196235342412
Q8NHG8	ZNRF2	-0.0725943773266741	3.40960901513491	-1.82495639726713	0.122275343916426	0.513173438491011	-5.05221837289353
Q7L7V1-1	DHX32	-0.158511904147107	3.29143048382363	-1.12628875905616	0.306778518396369	0.703095213524691	-5.05264994844691
P24941-1	CDK2	0.047576450561992	3.23731603531064	2.27114653720771	0.0675460055808754	0.411127614359632	-5.05268838690206
O75438	NDUFB1	0.233562701959572	3.18629126366764	1.87368389526704	0.114554825162661	0.499965389993023	-5.05298299633466
Q02083	NAAA	-0.0990777643056822	3.33644590394806	-1.85236053305548	0.117871059050063	0.503705822590287	-5.05338495164041
O75674	TOM1L1	0.117299466811405	2.95485121502708	1.39881181313795	0.215663045975406	0.620482802702815	-5.05574272428967
Q7Z6Z7-2	HUWE1	0.0293735605775566	3.28689369051048	2.98573718627549	0.027197965392102	0.278272029475966	-5.05609850864489
Q96GK7	FAHD2A	0.0919725923302843	3.37084345154077	1.75780985072152	0.133776248151124	0.532890148568462	-5.05732799769979
P98175-1	RBM10	-0.0999252416861432	3.29501382923692	-1.5415886178896	0.178547395893002	0.585774087769037	-5.05806572408026
Q07820	MCL1	0.101582314484359	3.37462099004349	1.65472032989183	0.153553862211972	0.549684148722699	-5.05914475823862
O43852-4	CALU	-0.131146986934329	3.35221609436705	-1.68171514215921	0.148112840590186	0.547180403082038	-5.05969261751959
P13796	LCP1	-0.0340450304582162	3.41008647301178	-3.16633350514933	0.021856844461674	0.259697825878857	-5.06002827791999
Q8IWL3	HSCB	0.114496739070714	3.25134657905357	1.34393125954858	0.231756326059966	0.635863683173507	-5.06240160955053
Q8N594-1	MPND	0.144474612376422	3.35164540529768	1.5867984009854	0.168120498284334	0.572670583354394	-5.06284797515317
Q8IWY9	CDAN1	-0.0926304792212002	3.29508353205698	-1.74182454136143	0.136669360350438	0.533513509594352	-5.06393331868141
Q9Y281-1	CFL2	0.0933878153207133	2.51784637978193	2.03067841603574	0.0928826406176456	0.464551421303433	-5.06405914931243
O60293	ZFC3H1	-0.0528359988156946	3.32005009448547	-2.2247716428543	0.0718003745907637	0.418626338101832	-5.06413377869894
Q8WW59	SPRYD4	0.109170890214436	3.41107540392216	1.91349585231303	0.108613469183747	0.492247105154085	-5.06427395986902
Q96FX7	TRMT61A	-0.0642417894266441	3.26149825208867	-1.95241511573189	0.103107586133064	0.482623168725667	-5.06432939691539
Q9H0F6-1	SHARPIN	-0.0828154417153451	3.35542279705613	-1.60189886043645	0.164770433045252	0.568264475988024	-5.06546803562719
Q969U6	FBXW5	-0.117449745400232	3.35686152197048	-1.5225806189721	0.183113941147138	0.592059601919702	-5.06573770221875
Q8WVK2	SNRNP27	-0.0712094141268693	3.31547571863028	-2.03737426148131	0.0920576561638828	0.463335002765982	-5.0658572600686
Q9NYA4	MTMR4	-0.127166499972737	3.20635074023339	-1.38422935198856	0.219835571708856	0.62282589296073	-5.06689014273954
P17844	DDX5	-0.0610319533392296	3.23038870859221	-2.74278873628889	0.0367774021907996	0.315782589071777	-5.06743998033017
Q3MIT2	PUS10	0.0903311338513527	3.07159818873072	1.75025749458863	0.135135461896315	0.532945725000488	-5.0677588224079
O95835	LATS1	0.104822745048784	3.16305116606985	1.35078671539631	0.229687388562317	0.633162643947415	-5.06779939785419
P61981	YWHAG	0.102250006425961	3.3731260710574	2.47962431231379	0.051462436857465	0.359974881568922	-5.06848624592453
Q9BSY4	CHCHD5	0.0759423029957396	3.3524372960047	1.81712759228182	0.123563647384352	0.514300209113073	-5.0687728903349
P21580	TNFAIP3	0.0579896705720904	3.407339677556	2.29957258519393	0.065070135675687	0.406573454911661	-5.06932065966603
Q6ZU80	CEP128	-0.05940383244336	3.30980771501191	-2.13602356512153	0.0807436076271695	0.440193455368883	-5.06937505070411
Q9P021	CRIPT	-0.223058577096446	3.23181476281577	-1.77408016712776	0.130894047957783	0.528450324547877	-5.06965079966173
Q3MHD2-2	LSM12	-0.127962286155487	3.30347195746056	-1.93520860099248	0.105505870255548	0.487030364683234	-5.07198028291233
P35219	CA8	0.0961946886572705	2.63288837503846	1.76727133527609	0.13209260110981	0.530403420426105	-5.0725502470641
Q6NTE8	C5orf45; MRNIP	-0.0717965033319579	3.32986305059443	-1.79614087223953	0.127084685720899	0.52038864515628	-5.07276621460262
Q9UK99	FBXO3	-0.059925057962611	3.34070189347855	-2.14055018183682	0.0802604363784556	0.439571288174024	-5.07501152513692
Q08AM6	VAC14	0.0738281929491418	3.37726112846004	2.39293785277773	0.0575914139297263	0.380284365850314	-5.0751745451486
P41227-1	NAA10	-0.0964407378691435	3.29287688524704	-2.47789788009521	0.0515774601154838	0.359974881568922	-5.07538379024333
Q02153	GUCY1B3	-0.103035663685987	3.20208591441375	-1.25262884277455	0.260971303169008	0.659492142820328	-5.07895592721024
Q9HB90	RRAGC	-0.0731991659297564	3.32850741818221	-2.21563965455217	0.0726707963164787	0.420765721465958	-5.07911065226251
O95931	CBX7	0.0826300448337678	3.42210652939357	1.67649690287086	0.149149673385524	0.548164681120648	-5.07939456751543
Q9HC44	GPBP1L1	-0.0891655063054134	3.32606473980142	-1.6325001375631	0.158178708015757	0.557424579431389	-5.07946938429825
Q86W92-1	PPFIBP1	0.0971941537061372	3.12205444233919	1.68290990177334	0.147876446201683	0.547180403082038	-5.08142842533636
P04083	ANXA1	0.0955162443309694	2.54986584886736	1.43878657681145	0.204599206716469	0.609504350614539	-5.08282115330368
Q9BXJ8-1	TMEM120A	0.211593989704813	3.27495585719984	1.46509676459062	0.197609411536981	0.606339456466303	-5.08350543451572
Q8IX90	SKA3	-0.116717601311945	3.16811311818704	-1.90939608784042	0.109210597710612	0.492247105154085	-5.08434711159835
Q5VW32	BROX	-0.110629940709486	3.3648970035338	-2.06645248566658	0.0885616589821293	0.458942057109055	-5.08484637955404
Q9BRK5-1	SDF4	-0.110846670108654	3.33780570453573	-2.37390118453569	0.0590387769756455	0.384180695866688	-5.08567552926916
Q9NV06	DCAF13	-0.0737207082536924	3.25103060804459	-1.92453366823733	0.107022242532324	0.49031238448439	-5.09100131376581
A6NFQ2	FAM115C; TCAF2	0.0708516169081013	3.39426523486078	2.11200783116056	0.0833581233738394	0.444708972475356	-5.09236714975402
Q9H444	CHMP4B	-0.0963941246228523	3.39230942139247	-2.59864320181068	0.0441594260525052	0.344627633485128	-5.0925422605979
Q96I99-1	SUCLG2	0.151343955719959	3.39504579051519	2.49596422520212	0.0503872901831019	0.354928140129403	-5.09313361412153
P31321	PRKAR1B	-0.109328709111434	3.38446913603752	-1.54147883236232	0.178573455869156	0.585774087769037	-5.09653973161467
A0PJW6	TMEM223	0.147671186753976	3.27877735749584	1.35939434538985	0.227113619783388	0.632418290051339	-5.09762473595716
Q2LD37-1	KIAA1109	0.100773717553482	3.35739019117937	1.26805053551448	0.255815199454332	0.657220158345455	-5.09808200242107
P08243-1	ASNS	-0.0388185653447095	3.30551618503058	-2.68943769913386	0.039340836787165	0.326275047352658	-5.09914113930144
P32929	CTH	0.0800845799020051	2.90112901781174	2.0796333794347	0.0870223911557144	0.456290572034877	-5.0996881339959
Q9NSG2-1	C1orf112	-0.0878853754695046	3.28912494795994	-1.54963522496351	0.176647241360419	0.583709000360941	-5.10094069901938
Q15714-1	TSC22D1	0.0978851845098928	3.07512022799647	1.41458240730114	0.211233292323144	0.616013098046061	-5.10104589622928
P49902	NT5C2	0.0598279094552295	3.3875379557407	2.12541695728914	0.0818876460367484	0.44173736526193	-5.10189655994115
Q99576	TSC22D3	0.123860548488175	3.21002031913975	1.23659378818325	0.26643047949753	0.666364984830019	-5.10295453620401
Q14197	ICT1; MRPL58	0.097679577327902	3.31892857752823	1.77099652687168	0.131435511318243	0.529681958681794	-5.10455603927769
Q9GZZ1-1	NAA50	-0.0719260240015515	3.29018652131935	-2.37816813782366	0.0587110318081539	0.382743317388054	-5.10532252669583
Q96P11-2	NSUN5	-0.0525099595361752	3.34961379844825	-2.20444830219634	0.0737526136716304	0.424456394777996	-5.10546755906665
Q14596-1	NBR1	0.10254969184386	3.29464606609778	1.56809501330853	0.17236109182228	0.578726902711972	-5.10642830225603
Q9H477	RBKS	0.0887068086602423	3.36801303851073	1.68673688351402	0.147121733569624	0.547180403082038	-5.10840010293413
Q9HBM0-1	VEZT	-0.181296974648942	3.19406875394642	-1.65792077922835	0.152898701080786	0.549684148722699	-5.10848618316805
Q9BYV8	CEP41	-0.0880700451251658	3.26583749682493	-1.97404855827851	0.100170992376992	0.478571009778351	-5.11019253058807
Q13342	SP140	-0.0876303322691894	3.40566980747167	-1.95172494687746	0.103202705346014	0.482623168725667	-5.11077649489731
P62753	RPS6	-0.169185756124086	3.24555908753663	-2.43465503270432	0.0545500172743054	0.371514909947194	-5.1133204457183
P62136-1	PPP1CA	-0.0692685981756349	3.39988289598751	-1.89484191830475	0.11135742664502	0.493561688805438	-5.11520762002912
Q9UKY1	ZHX1	-0.0880661811040159	3.19225119282195	-1.72669670838703	0.139464370895684	0.538471855922338	-5.11531982381349
P07196	NEFL	0.268601422795387	1.08716380672608	1.61948543229529	0.160950261900409	0.562322068864112	-5.11546851659965
Q9P2G1	ANKIB1	0.0857873565186031	3.41028879561048	1.74276964365517	0.136496596967883	0.533513509594352	-5.11658669164841
Q49AN0-1	CRY2	-0.0967722345901793	3.36452171109713	-1.66247306495132	0.151971513784611	0.549684148722699	-5.11849856003256
Q15025	TNIP1	0.106116405126721	3.36559257979938	1.90527080996068	0.10981480471896	0.492247105154085	-5.11875953997215
Q96IZ5	RBM41	-0.126260037422068	3.352426065182	-1.7071077477603	0.143167731189072	0.544636949096177	-5.11904706601486
Q6P1Q0-7	LETMD1	0.126042768534503	3.01969014496928	1.51945589086087	0.183875223144356	0.592465458820377	-5.12043967561724
Q96H79	ZC3HAV1L	0.144413641395968	1.97819304809876	1.26599934873097	0.256495703920614	0.657220158345455	-5.1229548921341
Q8TD19	NEK9	0.0649711568597675	3.27475507873733	2.3375277900597	0.0619127073582503	0.393362210644762	-5.12302255758675
P61599	NAA20	-0.10543344857371	3.24756699087646	-1.35679004980705	0.227889525605552	0.632482820446127	-5.12385307041263
O15061-1	SYNM	-0.0844829344333178	3.33019068952864	-1.9045205747317	0.109925051429742	0.492247105154085	-5.12402416409933
Q9UHR5-1	SAP30BP	-0.0894662070728787	3.325433661789	-2.01635877022137	0.0946725694361663	0.469054279061769	-5.12408553085267
Q9HD26-1	GOPC	-0.0976630351457995	3.28076833485277	-2.18620087011131	0.0755528156260543	0.427856804244597	-5.12442848744831
Q5T7W7	TSTD2	0.114725800727794	3.29044320844811	1.09508333531424	0.319106992495915	0.712019782317733	-5.1247015720711
P05556-1	ITGB1	0.101102131676877	3.20367617667754	2.12961554989717	0.0814327795423507	0.44173736526193	-5.1260199481182
Q8TCG1	KIAA1524; CIP2A	-0.0863139477978736	3.16185046348322	-2.32075506056271	0.0632875469113152	0.39833229432384	-5.12758667921752
Q9NQ29	LUC7L	-0.0678366774355644	3.08389264070277	-1.89360625067975	0.111541653238912	0.493603023747179	-5.12780567418062
Q9UJU2-1	LEF1	-0.188983868570092	3.26960900850998	-1.6531136103738	0.153883806023495	0.549923946884599	-5.12812212910058
Q15363	TMED2	0.0734551810257453	3.25934892454337	2.00877864622813	0.0956343838354491	0.471098428120241	-5.12840362340173
Q8TBZ3-7	WDR20	-0.0780176393544421	3.37977562604923	-1.64629501517793	0.155291742767339	0.552312748614841	-5.12849188149902
O94887-1	FARP2	-0.0759691516241074	3.30213626532476	-1.86630985639697	0.115690861952452	0.500506261221513	-5.13037538268426
Q99584	S100A13	0.280534746450304	1.4465081213571	1.48075937957771	0.193555691254046	0.602073742068345	-5.13060586304569
Q96AB3-2	ISOC2	0.142805170940203	3.39426969503075	1.68504329743083	0.147455254988716	0.547180403082038	-5.13116621031426
Q9P1U1-1	ACTR3B	0.0744235338739062	3.27389303844692	1.74180923237405	0.13667216059528	0.533513509594352	-5.1314034972639
Q7Z5U6	WDR53	-0.0855249703821407	3.32504774057699	-1.71496178760225	0.141671380736967	0.541731482539062	-5.1334407493998
Q8N6S4	ANKRD13C	-0.136864752035509	3.35707629586806	-0.864822409294695	0.423249286022565	0.774048271733896	-5.13354215545191
Q4VC44	FLYWCH1	-0.0859479286752776	3.35480438769506	-1.76098528726779	0.133208821847836	0.532676799798424	-5.13363113865415
P49419-2	ALDH7A1	0.114378616742286	2.15745204792085	2.23106191983244	0.0712071782853089	0.418626338101832	-5.13393160569511
Q9H2C0	GAN	0.0923443216400994	3.20414802222601	1.65942181531164	0.152592367600402	0.549684148722699	-5.13435906907689
Q9Y657	SPIN1	-0.0852649618581956	3.24553814611416	-1.85077994539761	0.118120692791573	0.503811736640197	-5.1349791556427
Q3B726	TWISTNB	-0.0818253612512728	3.29838800819811	-2.06891672688904	0.0882717598288634	0.458549280965703	-5.13742065182071
Q08945	SSRP1	-0.0852191558978952	3.2326368759834	-2.57006534885774	0.0458050706657471	0.346976575100997	-5.1377083178735
P20248	CCNA2	-0.109943438666277	3.24008697428853	-2.05479453939879	0.0899465167506504	0.461431402796698	-5.13951967780364
Q9H0B6	KLC2	-0.0943021843835999	3.22570638344195	-2.22219788339635	0.0720445821758465	0.418626338101832	-5.14026636294112
Q96E09	FAM122A	-0.125647604812742	3.30481362471645	-1.66905301256077	0.150641060134078	0.549435271959452	-5.14032753072703
Q99618	CDCA3	-0.085037400919351	3.33544470468629	-1.74685107393883	0.135753000610972	0.533513509594352	-5.14107954551428
P48380	RFX3	0.347419260882721	3.26881010070884	1.15356853656827	0.29633636155369	0.694309174752144	-5.14299928079202
Q96BQ5	CCDC127	-0.135517740373424	3.3777813286247	-1.26083986537987	0.258214584675743	0.657220158345455	-5.14331727417077
P55884-2	EIF3B	-0.0633663580364585	3.33316916207747	-2.78952510252424	0.0346806031489344	0.307144946465266	-5.14481295203644
Q13569	TDG	-0.112088351911656	3.2879050590175	-1.80390331358801	0.125770794721413	0.517399805457367	-5.14582386839138
Q9BXS6	NUSAP1	0.199077964254625	3.29359068304529	1.69372641227897	0.145753097974814	0.546308516636974	-5.14654611379178
Q9NWF9-1	RNF216	-0.113059940101881	3.29315664929914	-0.966385092623376	0.374404527381276	0.747748529147725	-5.14669545576906
Q9NYJ8-1	TAB2	0.119040631447036	3.16468162679437	0.92748851545042	0.392561377781959	0.758927027605134	-5.14940285574931
Q96AV8	E2F7	0.0999166785187054	3.33505729689149	1.08132889235255	0.324672618568194	0.715448195085114	-5.15199808462508
Q99567	NUP88	-0.0480081269511856	3.3230653800832	-2.23485349484958	0.0708521053814103	0.418145612268516	-5.1522667651941
P42680	TEC	-0.0935323592525127	3.38123814714403	-2.13732719260114	0.0806041488279858	0.440064184082739	-5.1525324414521
Q7Z5Y7	KCTD20	-0.0943969016309891	3.21602990796305	-1.3068730186114	0.243237520189988	0.646585429569666	-5.15320044311928
O75167-4	PHACTR2	-0.101839737046743	3.28692409928728	-1.04928498565947	0.337954967189609	0.724682099018383	-5.15361279029274
Q15075	EEA1	-0.0389506121558031	3.36792158073796	-2.70038204423006	0.0387995791064937	0.325606455373097	-5.15484964437761
O60294	LCMT2	0.121994851952733	3.29831578136964	1.36188890914292	0.226372681679733	0.631925733493009	-5.15548404805657
P16152	CBR1; SETD4	-0.0482597367714693	3.36194090888507	-2.49684094915938	0.0503302868339749	0.354928140129403	-5.15597755224243
Q9Y6N7-2	ROBO1	-0.0625089941644447	3.298611099617	-1.90089939340443	0.110458762459612	0.492247105154085	-5.15666110200903
Q8N1I0	DOCK4	0.0503268137558627	3.38547657835195	2.43010570148605	0.0548732142372448	0.371743599673863	-5.15753699562591
Q14451-3	GRB7	0.124363454821408	3.41136475416676	1.44475350428368	0.202993935059828	0.609504350614539	-5.16009001998212
Q9GZT4	SRR	0.096660622424472	3.32489632753929	1.77494587979774	0.130742435323013	0.528155438846932	-5.16108010766124
O00560-1	SDCBP	0.102890772931409	3.13427292329138	1.78386495875955	0.129190586884252	0.523869544618108	-5.16142092761849
Q14677-3	CLINT1	0.0603960625602901	3.37322853435777	2.51455769652751	0.0491930546557662	0.353663864594717	-5.16474682324015
Q9NVU7	SDAD1	-0.0868241247849816	3.374057155013	-2.00500293380763	0.0961172083296176	0.471098428120241	-5.16521852035544
O95405-1	ZFYVE9	0.109241739677001	3.17582089685799	1.12789406107525	0.306155426295839	0.703095213524691	-5.16700051600444
Q99729-3	HNRNPAB	-0.0348963515844723	3.2884229352693	-2.60642546941573	0.0437224074103355	0.343800486350461	-5.16711309238128
Q9NX07-1	TRNAU1AP	0.124213875656548	3.36216708931827	1.50302328332342	0.187928554570773	0.5967197656234	-5.16808763976324
O75398	DEAF1	0.102096726230069	3.24555883376769	0.666207082557834	0.53221008241051	0.830242788109411	-5.16998893834851
Q86Y82	STX12	0.0863242200526773	3.17792835188007	1.66303013624292	0.151858430679842	0.549684148722699	-5.17135447468567
Q6DN90-1	IQSEC1	0.0495028547487629	3.3912909543053	2.05736077890014	0.0896397637767592	0.461377099622799	-5.17489426900268
P15056	BRAF	0.0502400758436868	3.39128659545918	2.14097819004973	0.0802149067468796	0.439571288174024	-5.17546209883932
Q9NRR5-1	UBQLN4	-0.051890766343465	3.35065856970172	-2.07074842850384	0.0880569096276938	0.458462606723184	-5.17550121075213
Q96F45	ZNF503	0.164218292631	1.83465278637952	1.27145510341093	0.254689262887768	0.656449856262107	-5.1755254384682
Q8N531-1	FBXL6	-0.113182229414275	3.34689950847263	-1.4043045912436	0.214110496421023	0.619298948770275	-5.17553814317095
Q7Z2W4	ZC3HAV1	-0.0749034912709708	3.33895362484331	-2.39787657596726	0.0572221165335834	0.378962627919948	-5.17607475634138
Q96C92-4	SDCCAG3	-0.0906105457351272	3.30204164769549	-1.60722075599582	0.163605225655002	0.56629985934754	-5.17646946871029
Q9Y6E0	STK24	-0.0834825545627769	3.36904535093304	-1.96361723258881	0.10157615738167	0.480996514934577	-5.1774862964304
Q9HAD4	WDR41	-0.0911809698647322	3.19767005616736	-1.83574526713786	0.120521991852669	0.510169287930504	-5.1784107714809
Q7Z4H7	HAUS6	0.0611766443796893	3.16329256571502	2.12965429472678	0.0814285942646737	0.44173736526193	-5.18071091010404
Q12860	CNTN1	0.13065031267239	3.11497031693415	1.6717278998293	0.150103470256293	0.549205953789125	-5.18172380850555
Q969G6	RFK	-0.0748851059520927	3.27519580144538	-1.92921428285055	0.106354651497741	0.48933331099782	-5.18264909784593
Q9H5Q4	TFB2M	0.0907819722448399	3.2554004502304	1.83285119392342	0.120989828666572	0.510321594490244	-5.18428189933075
Q96Q83-1	ALKBH3	-0.0915117429155831	3.29660721275663	-1.45485606748361	0.200302954817828	0.608696411521447	-5.18450484304246
Q9P2R6	RERE	-0.0691495645072184	3.25372114206974	-0.398458219732226	0.705297609714923	0.908164158924154	-5.18459776042696
P63241-1	EIF5A	-0.0621989614123815	3.31578964556966	-2.8349762996965	0.0327658404999161	0.300494319433353	-5.18664646532905
Q5VU43-2	PDE4DIP; LOC653513	0.0532831097264794	3.35002584554026	2.19197919042852	0.0749778332596448	0.426218834370807	-5.1876330511837
Q86UY6	NAA40	-0.110896077251903	3.07794217042231	-1.33565744349058	0.234276002120725	0.638332138819823	-5.1881076473411
Q9BRA0-2	LSMD1; NAA38	-0.0998345012028916	3.27686851796447	-1.57072909526958	0.171757696774225	0.57829032534265	-5.19021162625865
P50336	PPOX	0.158864185629914	3.39141421826362	1.95037886606852	0.103388480060244	0.482623168725667	-5.19039112831974
Q9UNZ2-5	NSFL1C	-0.0470731775961278	3.35904879955636	-2.38691302623209	0.0580453606756928	0.380664306792202	-5.19045251379775
Q56VL3	OCIAD2	0.299908839676082	3.11354960966144	1.79560921799751	0.127175175343904	0.52038864515628	-5.19056401890228
P17535	JUND	-0.096760787896138	3.27790500404641	-1.25552257674951	0.259996797399093	0.658360054727392	-5.19258962304753
Q92562	FIG4	0.05733608803136	3.36905706365233	1.85679003242602	0.117174303624807	0.502004887804943	-5.19271092852855
Q14204	DYNC1H1	0.0285972280767945	3.26533121848485	3.21725467404969	0.0205687307526729	0.256042607628643	-5.19315469569058
Q9UBF2	COPG2	0.064837522199662	3.24521272584401	2.42088410050424	0.0555346224120171	0.374051835524628	-5.19424589929581
P52888	THOP1	0.0585790810704464	3.38025623976411	2.53410019017086	0.0479705141960749	0.350497604810886	-5.19482709111058
Q9NUQ8	ABCF3	-0.0558484616039574	3.3685006000951	-2.28980017672569	0.0659103245321131	0.406895202351148	-5.19557469996327
Q02978	SLC25A11	0.189347606839449	3.15601504616371	1.9126082336225	0.108742468694792	0.492247105154085	-5.19579416743315
Q01201	RELB	-0.0909153074481642	3.38661104531753	-1.80249903498872	0.126007476034788	0.517739764001128	-5.20111574998767
P14927	UQCRB	0.153608051355854	3.26581295731298	1.71427578520975	0.141801460422806	0.541731482539062	-5.20263199689932
Q9NRX4	PHPT1	-0.149420151313898	3.33439634088925	-1.9912224813453	0.0979007247322346	0.474991405647826	-5.20432288328053
Q03519-1	TAP2	0.0848083322051768	3.33491883884529	1.9566915091666	0.102520203319747	0.482623168725667	-5.20468904988335
Q9NP80-1	PNPLA8	0.0995184864078976	3.3438765053976	1.36610481277039	0.22512551615474	0.630091234286588	-5.20659791306467
Q5J8M3-1	EMC4	0.084774447235374	3.17657407566374	1.45968614073223	0.199028258295172	0.607018127159776	-5.20661478006196
Q8IY57-5	YAF2	-0.0941904015284665	3.32631668293035	-0.729490159585817	0.49558203069529	0.809747790552684	-5.20689911956265
Q9NYJ1-2	COA4	-0.1020311394764	3.29109590127059	-1.26755739403741	0.255978657022523	0.657220158345455	-5.20713072074383
Q9NVS9	PNPO	-0.0904845514949696	3.37060734140047	-1.89416112966682	0.111458887772487	0.493561688805438	-5.20797504937687
Q9Y3T6	R3HCC1	0.0686128287850909	3.37575170795765	1.86024403152739	0.116633874483417	0.500506261221513	-5.20802586338219
Q13127-1	REST	0.109452160269524	3.35978364134272	1.20750693679033	0.276591759911498	0.673949399857431	-5.20823903577807
Q9HBL8	NMRAL1	-0.0706753697256753	3.33630940381193	-1.73202706342579	0.138473139587502	0.536453300279863	-5.20904687289937
Q9H0H5	RACGAP1	-0.0865566928557643	3.32234054665246	-2.08442241408213	0.0864700028671731	0.455488672848916	-5.21022503056612
O15460-1	P4HA2	0.0996995216415372	2.773732420078	1.19885465606602	0.279679481996874	0.67664382578019	-5.21059446128602
P48507	GCLM	0.0781400588903616	3.15411499699218	1.98836820513201	0.0982743569075999	0.475936763064039	-5.21248850441448
O00409	FOXN3	0.00529429855772279	3.38048837158496	0.0263666431723934	0.979895318807684	0.994539534305534	-5.21279444445827
Q9H9D4	ZNF408	-0.0980553664525574	3.41908326928921	-1.12870590447548	0.305840724234083	0.703095213524691	-5.21366704639243
P16403	HIST1H1C	-0.246660556732165	3.09125957005079	-1.7837091339935	0.129217540875084	0.523869544618108	-5.21401263383906
P25054-1	APC	-0.0944271235687547	3.14855181243143	-1.41554362167155	0.210966053981785	0.615683610906003	-5.21417818366817
Q9HAW4	CLSPN	-0.0995885070738636	3.24798530790589	-2.05254806632588	0.0902159358723429	0.461431402796698	-5.21434761976102
Q96E11	MRRF	0.0968014084375064	3.34930690757566	1.69704437931966	0.145107789898668	0.546308516636974	-5.21451469791407
P57721-1	PCBP3	-0.132104109044425	3.35519895940695	-1.12279823805464	0.308137089499363	0.703910379407116	-5.21452258475136
Q13445	TMED1	-0.122811370886829	3.30347596704062	-1.82433671491167	0.122376825632415	0.513173438491011	-5.21456656907694
P31350-2	RRM2	-0.114340709492114	3.40867082298248	-2.49377134893699	0.0505301709122061	0.355296871204863	-5.21457190585806
Q96GN5-1	CDCA7L	0.0953509681617081	3.32693751399457	1.55250050532654	0.175975313940665	0.582878672898643	-5.2177070716635
Q13619-1	CUL4A	-0.0578919554953494	3.3458330282737	-2.38261255494255	0.058371709675469	0.382059038401658	-5.21778463841907
Q9UBB5-1	MBD2	-0.0815950246972559	3.40521919592089	-1.90080161921308	0.110473209360366	0.492247105154085	-5.22017053808688
Q9HAV0	GNB4	0.0785994996937764	3.28459144568598	1.75581352240415	0.134134205798548	0.532890148568462	-5.22079262543856
P52435	POLR2J	0.158526209726596	3.33216112645189	1.74845458899474	0.135461956633144	0.533255164863764	-5.2210511224519
P01130	LDLR	0.153013494601859	3.35187134507135	1.37368935828605	0.222897727829391	0.626687771050664	-5.22108495396982
P61962	DCAF7	-0.0564173241869408	3.25838618063579	-2.09003541147269	0.0858271921798738	0.453561624082635	-5.22309396164465
Q96S94	CCNL2	-0.0777263198539511	3.29433137851173	-1.65875259520537	0.152728868730553	0.549684148722699	-5.22312250320345
Q3KP66-1	C1orf106	0.0861521486546656	3.40275384555785	1.32225809663292	0.238409625864438	0.641549041257307	-5.22430985316217
Q9BUR4	WRAP53	-0.0907759373490952	3.08626091053645	-1.59528316264948	0.1662301170297	0.569810732622969	-5.22535382354099
Q9P2E3-1	ZNFX1	0.0788473874799743	3.32991069836019	1.44145131447293	0.203880853410303	0.609504350614539	-5.22560787692358
O43683	BUB1	-0.0679966675636779	3.28496972257568	-2.11403131919322	0.0831344776054748	0.444574350408912	-5.22731958379283
Q99607	ELF4	0.100183988857867	3.29449674702776	0.86634145196393	0.422484373384681	0.774048271733896	-5.22878099182485
Q8TAP8	PPP1R35	-0.0851130915665519	3.27597206072355	-1.26182723202196	0.257884849293101	0.657220158345455	-5.22904152453963
Q13823	GNL2	-0.121760481272078	3.34817088277279	-2.32573392508978	0.0628760955791592	0.39611350935624	-5.22946007081399
O43464	HTRA2	-0.0761021796555007	3.36867155047822	-1.58403958564293	0.168739614998924	0.573151941396041	-5.2298025082651
Q9H081	MIS12	0.0630429655660677	3.30564974668747	1.90113141293834	0.110424487423781	0.492247105154085	-5.22981241436385
Q9H7N4	SCAF1	-0.0539536570059379	3.3579610633956	-2.14298785065133	0.0800014871094996	0.439571288174024	-5.23210657967273
Q86TV6-2	TTC7B	0.0752784001594527	3.24591710748214	1.61696484119471	0.161492464340282	0.56333801001317	-5.23298929134398
Q9Y5X1	SNX9	0.121873075984237	2.03860516735026	0.919171968776802	0.396531856041673	0.760161380464096	-5.2376631820444
Q68CR1-1	SEL1L3	0.117144831567643	3.28581361140683	0.733967459221926	0.493057423390344	0.808345560549708	-5.23783358137457
O60331-3	PIP5K1C	-0.112345054620188	3.35588385832922	-1.44296173805614	0.203474726815853	0.609504350614539	-5.23922604269455
Q2M3G4-1	SHROOM1	-0.0953452669843597	3.31021397219724	-1.11123070782053	0.312676084955333	0.707441482016072	-5.23977226984078
Q6DHV7	ADAL	0.141930683551158	3.34628905410833	1.93797921945269	0.105115890108447	0.486778165684497	-5.24040084503435
Q02127	DHODH	0.077368428097255	3.28326225036251	1.97536280699699	0.0999953698980776	0.478571009778351	-5.24555502393976
Q12772	SREBF2	-0.0891528178954694	3.24189795908953	-1.18178189348898	0.285860818867033	0.682128656167623	-5.24698222789345
Q9HD45	TM9SF3	0.0805188877380014	3.29220543953968	2.02661689012175	0.093386759034964	0.465686790974057	-5.2480330013504
P05362	ICAM1	0.0687579855646994	3.36865675986366	1.6478544372248	0.154968640637011	0.551947801840978	-5.24817493219856
Q9UEU0	VTI1B	0.0916181174955268	3.19665028157799	1.4658444720454	0.197414088081356	0.606339456466303	-5.25036009273035
O75586-2	MED6	-0.0928267478926491	3.30683447776198	-1.40245321535137	0.214632630638359	0.619907765392884	-5.25057558249015
O76070	SNCG	0.131540451385498	1.47409355731961	1.13960579125661	0.301642241702055	0.699413623801883	-5.25079031221245
Q86UB9	TMEM135	0.112363671036595	3.33142177892844	1.30505184469133	0.243814837779484	0.646718452443449	-5.25127324294106
Q9BXF6	RAB11FIP5	-0.068376469418352	3.37528514691003	-1.97749692285451	0.0997108595673389	0.478071610564659	-5.2520386013492
Q68DQ2	CRYBG3	-0.0836983504020846	3.32338115694331	-2.04870900737037	0.0906782820989071	0.461431402796698	-5.25222792685653
O95232-1	LUC7L3	-0.0780888721950909	3.25284001187025	-2.33463727842976	0.0621473658547252	0.394108106863644	-5.25266534126467
Q8TEQ0-1	SNX29	-0.0522430865487769	3.40466831978836	-2.25316681527556	0.0691630980123858	0.413468363058133	-5.25338646651162
Q8NEM2	SHCBP1	-0.0701419228825144	3.37049228150919	-2.21470096192645	0.0727608933786961	0.420911123314626	-5.25442925694116
Q8IW45	CARKD; NAXD	0.0651093152729159	3.38189546119734	1.88488892353054	0.112850122205925	0.496777027811542	-5.25452725231948
O95081	AGFG2	-0.119106454574635	3.30944971273011	-1.0634764102279	0.332017744511119	0.720640387020904	-5.25614681237477
P27816-4	MAP4	-0.0750587140951808	3.3394828719179	-1.74310668738925	0.136435038229593	0.533513509594352	-5.25686288111794
P36551	CPOX	0.0697677684325334	3.35162204512672	2.35271772165072	0.0606948833771322	0.388933275558706	-5.25847277415779
Q9UPV9	TRAK1	0.0915498723376743	3.31620172913707	1.23912996173927	0.265560335845305	0.66508814364834	-5.25889811476275
Q7Z7L7	ZER1	0.0948278221603649	3.28387744535737	1.34192497392061	0.232365028200078	0.636914639543216	-5.25922292722254
Q9BYV9	BACH2	-0.0887404801305724	3.3758870769009	-1.10688424668885	0.314396224589334	0.708629966903106	-5.25940654025855
Q96LC9	BMF	0.106310981030853	3.40590841082056	1.41858873813371	0.21012152282081	0.614905039791679	-5.25979778710481
Q93063-3	EXT2	0.117464421877189	3.24274016570032	1.41667527243626	0.210651834080966	0.615683610906003	-5.26015526943441
O00499-2	BIN1	0.113888234925623	2.53235368357906	1.73409167817473	0.138091080358058	0.536249706624419	-5.26023164378489
Q9H3L0	MMADHC	0.0900632765362156	3.16912345469144	1.11988722784716	0.309274026801101	0.703910379407116	-5.26025542513056
Q4ZIN3-1	C19orf6; TMEM259	0.119116533316579	3.2558687480081	1.68428502068499	0.14760482461534	0.547180403082038	-5.26170276831464
Q9H4L4	SENP3	0.0692083194135895	3.30045500511604	2.036004059439	0.0922258604136988	0.463335002765982	-5.26236841640086
Q96N64	PWWP2A	0.0816981831850973	3.36225863282344	0.56557452314898	0.593985076720614	0.856607307749081	-5.26402391682807
Q1ED39	C16orf88; KNOP1	-0.0475796318796534	3.14582084617033	-2.04869487532332	0.090679988559125	0.461431402796698	-5.264425391232
Q9BUT9-1	FAM195A; MCRIP2	-0.0796530829001689	3.41198079906304	-1.36601133341135	0.225153100975362	0.630091234286588	-5.26498966251204
Q6GQQ9-1	OTUD7B	0.0700018783390986	3.31854241195458	2.09243236693262	0.0855541981955727	0.452830960843023	-5.2659912774412
P49585	PCYT1A	-0.0711017410404695	3.3635684859439	-2.04638629082574	0.0909591976886618	0.461672708865106	-5.26644590762501
Q86VR2	FAM134C; RETREG3	0.08916886047308	3.28591595479536	1.43199614355187	0.206440476960005	0.609931334384155	-5.2666386375738
Q9P0J1-2	PDP1	0.0836398973805959	3.21940159896363	1.51938830124492	0.183891723374641	0.592465458820377	-5.26863060746877
Q8IVL1-4	NAV2	-0.061852766975707	3.39924124190031	-1.78030597449187	0.129807607653661	0.524694370804515	-5.26930426251489
Q8IY37	DHX37	-0.0524399035451015	3.23443646724446	-2.0338082860299	0.09249607100553	0.463579436397911	-5.26981369826339
Q8NHP6-1	MOSPD2	0.0642067241117496	3.25111529595581	1.6362080829256	0.157397617028254	0.555978340338373	-5.2748065222969
Q8NCL4	GALNT6	-0.107331342297901	3.30173960667731	-1.38488390003588	0.219646694394911	0.622718295960603	-5.27631117071787
Q9BZQ8	FAM129A	0.105355199144878	3.3984887766619	2.22209304332917	0.0720545482272864	0.418626338101832	-5.27742839247101
O15534-1	PER1	-0.106491844565762	3.21754502802036	-0.718962065496084	0.501553537253061	0.812776835527544	-5.27895669457002
Q9HB20	PLEKHA3	-0.0968563317669992	3.39202326533839	-1.26100921226108	0.258158003802087	0.657220158345455	-5.27942384505527
Q9P2W9	STX18	0.0841477594420812	3.14551249705668	1.54701187563662	0.177264590265225	0.584104203805314	-5.27959258017457
Q49AM3-1	TTC31	-0.0883352838929386	3.33790010909404	-1.2257060504337	0.270194753793273	0.669913600577319	-5.27966219772558
Q96JN8-1	NEURL4	-0.262168138853822	3.13332497768063	-1.81641179472237	0.123682115499553	0.514474740339107	-5.28085453945425
Q9H469	FBXL15	-0.0944688367406431	3.34276726601545	-0.839163304175483	0.436327992673197	0.77791622195399	-5.28146387082209
Q92831	KAT2B	-0.0753994385797692	3.32914988986818	-1.75017554907258	0.135150284752042	0.532945725000488	-5.28160999337621
Q9UEW8	STK39	-0.161503622812029	3.32082131330926	-1.72443826416097	0.139886464215234	0.539481820111763	-5.2836186674345
Q9P1Q0	VPS54	0.0852240124146475	3.2979013347719	1.45135097402011	0.201232776861663	0.6089439564885	-5.28367400406737
Q8NEZ4-3	KMT2C; MLL3	0.0533299503724165	3.34436405257881	2.14925586978409	0.0793396329879174	0.438225976125539	-5.28404691472743
Q8N3P4-1	VPS8	0.0534544068504427	3.35076400524918	2.01607901328629	0.0947078895715618	0.469054279061769	-5.28409440294248
P13929-1	ENO3	0.0955927795902044	3.05639432454801	1.82133630828209	0.12286938073124	0.51363680178818	-5.28463834634087
Q15788	NCOA1	-0.0194066374213053	3.31946827209488	-0.115760206365102	0.911952542824095	0.98386233067231	-5.28496509340502
P52735	VAV2	0.0843625263880061	3.17401738736203	1.46677485336838	0.197171298662381	0.606339456466303	-5.28552658213703
Q9NUT2-1	ABCB8	0.154562539986157	3.2832415946808	1.78784086247068	0.128504744130628	0.522570411401137	-5.28700344420967
Q14161-1	GIT2	-0.0551016065113896	3.37017305398782	-2.00603339549689	0.0959851888764695	0.471098428120241	-5.28806323585878
Q9Y2U9-1	KLHDC2	-0.0985521464521406	3.29670682206371	-0.930330361903872	0.391211774848852	0.757845979980975	-5.29012642730262
Q15050	RRS1	-0.0705721119071594	3.27734735089853	-1.90962970029007	0.109176482839717	0.492247105154085	-5.29018676308718
Q86U06-2	RBM23	-0.0770721821762332	3.23700070773272	-1.51737166370637	0.184384681803652	0.592465458820377	-5.29034050574358
P11217	PYGM	-0.178792723040269	3.01455793354664	-0.753079492695993	0.482381150187323	0.805406381410628	-5.29106463545617
P23229-1	ITGA6	0.0757682102165513	3.10355745081953	0.373400244259934	0.72281715235856	0.915059013358817	-5.29149968723134
P78560	CRADD	-0.0737715456851081	3.32315672149463	-1.44687265861893	0.202426668544926	0.609092240805279	-5.29225667964225
Q96FV2	SCRN2	0.066357096146449	3.37897918660489	1.82234903246085	0.122702907183959	0.513383919814221	-5.29273307263299
O75592-1	MYCBP2	0.025733074519443	3.35283356429777	2.77377541170062	0.0353722928916506	0.310813794532909	-5.29277747299171
Q9NY74	ETAA1	-0.175678424015599	3.31050258200022	-1.14149747887733	0.30091864608881	0.699250565146984	-5.29315454072521
Q8N612-2	FAM160A2	0.0957054015083696	3.35551286046222	1.71407349739973	0.1418398407124	0.541731482539062	-5.29317928953818
Q01082-1	SPTBN1	0.0599309884721256	3.38771862532794	2.38904717679393	0.05788412733583	0.380664306792202	-5.29388590857179
Q2M1Z3	ARHGAP31	0.0753667061539369	3.42268764683341	1.67259544617283	0.14992951782008	0.549205953789125	-5.29391034688163
Q9ULE6	PALD1	0.0496405772454178	3.38794697665653	2.19813465107985	0.0743703549427629	0.425923486954603	-5.29552054894645
Q7Z7A1	CNTRL	-0.0540657306284007	3.34932897295525	-1.89097018633536	0.111935698121166	0.494695439033844	-5.29670397025578
Q9NZB2-6	FAM120A	0.0436287788405404	3.40130838580607	2.46543602044688	0.0524159301283919	0.362275997082615	-5.29775329199577
Q9P0M6	H2AFY2	0.143230920599317	2.04270392275034	1.92673737288966	0.106707401298295	0.490055254886652	-5.29776565893598
Q9Y2H1	STK38L	-0.0507431515773396	3.40380129178713	-2.20175888618337	0.0740150926323845	0.424875706810323	-5.29801409359896
P23109	AMPD1	-0.0603895181774231	3.37519606294807	-1.78423776491609	0.129126123014811	0.523869544618108	-5.29884040283733
Q9BRR8	GPATCH1	-0.0494093613482375	3.34162537903428	-1.91235329754534	0.108779547838262	0.492247105154085	-5.29926503967519
P23497-4	SP100	-0.164045317065256	3.38254027937129	-1.27218859881642	0.254447268129479	0.656449856262107	-5.29976583366901
Q9NVG8	TBC1D13	-0.129611166617964	3.26670095676935	-1.9241438108326	0.107078039336966	0.49031238448439	-5.30048625155653
Q8N4N3-1	KLHL36	0.0926767057612179	3.31930311863362	1.03503737014486	0.344003917279715	0.729535578778624	-5.30150898750469
Q7L273	KCTD9	0.0928722115079927	3.1768789057454	1.38866218171812	0.218559356665273	0.62147038726902	-5.3016747576122
Q8IZ21-2	PHACTR4	0.075183318548459	3.26663835172139	1.68702459142033	0.147065148352606	0.547180403082038	-5.30182773654437
O14561	NDUFAB1	0.228029587568615	3.40491756319073	1.94414922512541	0.104252693131679	0.483953841224214	-5.30263556376405
Q8N4L2	TMEM55A; PIP4P2	0.0867820761615661	3.29358248593701	1.2496062417773	0.261992680773133	0.660831069477297	-5.30325684744401
Q9P2B7	KIAA1430; CFAP97	-0.0759046454286559	3.34163414137779	-1.43301219670546	0.206163985183472	0.609693932425562	-5.30414605072779
Q9H4Z3	PCIF1	0.0996061533970798	3.31737652314937	1.96085668366685	0.101951379629127	0.481262060299853	-5.30421595209596
O60678	PRMT3	-0.0727133952243232	3.09135387945489	-1.93420708080069	0.1056472020187	0.48707852672819	-5.30430481616599
P55055	NR1H2	-0.113981620731125	3.34156803318451	-0.813940476821984	0.449475127461654	0.783109536085152	-5.30540849339733
O00559-2	EBAG9	0.0877340621130609	3.3084851487182	1.55543524705611	0.175289638731095	0.581562680142384	-5.30604356609449
Q9Y2X9	ZNF281	-0.102810965573408	3.26660074571036	-1.79549824905118	0.127194070811034	0.52038864515628	-5.3060638826401
Q9NR34	MAN1C1	0.0993089740074933	3.41988644552096	1.35112145301192	0.229586800999262	0.633162643947415	-5.30689924217854
O43709-3	WBSCR22; BUD23	-0.0817629383362418	3.34801841627107	-1.60870869859291	0.163280877305053	0.565468344793696	-5.3070327717193
P11802	CDK4	-0.136696723889193	3.05375724894866	-1.90679882329094	0.109590610533108	0.492247105154085	-5.30815856561695
P67936	TPM4	-0.071534881123896	3.36018368628137	-2.4132007220831	0.0560921916818278	0.375053926324511	-5.30908070373862
Q96IW7	SEC22A	0.0884561003491735	3.31956749356468	1.10002564748345	0.317126872275812	0.710575611812669	-5.31085712716763
P06748	NPM1	-0.0691572273296854	3.26538190097414	-2.93182474534865	0.0290599312547384	0.287689039608765	-5.31249184002625
Q9BTT6	LRRC1	-0.0827417579081687	3.28058200830068	-1.52306397264719	0.182996449620506	0.591964453488469	-5.31322481579504
Q14157-5	UBAP2L	-0.211848621596229	3.22573180982089	-1.26345942074273	0.257340597800379	0.657220158345455	-5.31403338900463
Q7LG56-6	RRM2B	-0.1027354744059	3.21944712173531	-1.29560041834848	0.246830915652641	0.64912024112348	-5.31459037645995
Q96HE9	PRR11	0.0763266369220192	3.14442454640391	0.566673094621287	0.593288149246225	0.856044338950728	-5.31502248067106
P50238	CRIP1	0.0878920143591822	3.43446708459074	1.80280143351483	0.125956471271221	0.517739764001128	-5.31658414007388
A6NDU8	C5orf51	0.117488133669902	3.3260421930243	1.92230536981146	0.107341557726171	0.490721270432715	-5.31797945286021
Q6YP21	CCBL2; KYAT3	0.0552670729911083	3.33461229996893	2.03280880029921	0.0926193369655452	0.463579436397911	-5.31861143625485
Q9UMR2-1	DDX19B	-0.150819183696218	3.31202537682669	-1.76799756747409	0.13196424431713	0.530403420426105	-5.31886680416859
Q99807-1	COQ7	0.150561080577036	3.3711300252396	1.58231034575244	0.169128801656808	0.573309690307364	-5.31886680874469
Q96P70	IPO9	-0.0720284603815722	3.31200803384251	-2.293422334185	0.065597579800564	0.406895202351148	-5.31903789038094
Q9Y3P9	RABGAP1	-0.0454046955616564	3.29499221803354	-2.14525625811904	0.0797612994703588	0.439571288174024	-5.31939582267091
P56937-1	HSD17B7	-0.0873776402401625	3.33142954707739	-1.69596170609955	0.145318048309113	0.546308516636974	-5.32016143485033
Q9P0V3-1	SH3BP4	0.103819669689486	3.24539471092985	1.09599976080992	0.318739043188316	0.712019782317733	-5.32203785561749
Q6ZRI6	C15orf39	-0.0554166677472629	3.31899967123008	-1.90158612107767	0.110357347023846	0.492247105154085	-5.32308259219881
Q99767-2	APBA2	0.0967477482323982	3.29072922070635	1.44433095467355	0.203107223443155	0.609504350614539	-5.32506554272927
Q8NBJ4	GOLM1	-0.0593394322509992	3.23626093431711	-1.95408985300752	0.10287714511128	0.482623168725667	-5.32588639589695
P28799	GRN	0.105802881153908	3.26841257422022	0.944005651883779	0.384768182825857	0.75464170910046	-5.32590677426203
Q9BQI3-1	EIF2AK1	0.0852619402133273	3.16876012493446	0.924352149352706	0.394055074991766	0.759340966631302	-5.32606830376891
P08238	HSP90AB1	-0.113363156094322	3.30948196692598	-2.89400626315232	0.0304494226716678	0.293876711195934	-5.32608088127536
O00459	PIK3R2	0.0702126004879669	3.30088812497082	1.66068665200326	0.152334704096864	0.549684148722699	-5.32639347420364
Q9H0Q0	FAM49A	-0.0791886050202213	3.25938551844404	-1.15900669149716	0.294291720303941	0.691688441917164	-5.32697903310822
Q9UJW0-1	DCTN4	0.0566348478206618	3.30660602417218	2.11205011986711	0.0833534430356051	0.444708972475356	-5.32755363665265
Q9P2W1	PSMC3IP	-0.0826429058589058	3.23544349494713	-1.09481305053479	0.319215581596651	0.712019782317733	-5.32821866064457
Q9UIS9-9	MBD1	0.106434305677027	3.40442714838283	1.7374963871208	0.137463313737383	0.535561793896938	-5.32985620705117
Q5TBB1	RNASEH2B	-0.0518236616841941	3.30629615424458	-1.86691284206462	0.115597541184671	0.500506261221513	-5.33000303949126
Q86YR5-1	GPSM1	0.109826567909302	1.81819668394882	0.626428842008244	0.556121677279205	0.840015441254098	-5.33036480359262
Q96JM7	L3MBTL3	0.075562945541255	3.19942174527839	1.83068341925587	0.121341451441406	0.510631769945451	-5.33058150372724
P07741-1	APRT	0.0682375414171918	3.40144804695749	1.99225587562242	0.0977658098762637	0.474842322245842	-5.33096545387275
Q969Z3-1	MARC2	0.120081167628749	3.31262596042058	1.517418728061	0.184373162793422	0.592465458820377	-5.33292570835372
Q5SWA1	PPP1R15B	0.125980462909408	3.26094175006198	1.39789153850085	0.215924183310372	0.620482802702815	-5.33309969907032
Q92793-1	CREBBP	0.0742670491509404	3.30778350972926	2.17962770233641	0.0762124989494038	0.429034095526085	-5.33359142802116
Q68CQ7-1	GLT8D1	0.0789547282025534	3.14802645918974	1.28936039314448	0.248840606467635	0.651407731683885	-5.33490690189696
Q96EV2	RBM33	-0.056216321521523	3.31543191167439	-2.09847890849881	0.0848695354057144	0.450982622132183	-5.3355503476395
Q03113	GNA12	0.0689965703906395	3.36558168971699	1.59193331021681	0.166973988241236	0.571443213443565	-5.33577542542216
P09661	SNRPA1	-0.191319487786395	3.30788410684441	-2.16394507670015	0.0778108235681087	0.433765838722555	-5.33691869038512
Q9UEE5	STK17A	-0.0876998208502405	3.35233488013322	-1.40817458471749	0.213022869204002	0.618281401895207	-5.33703745645588
Q9NUJ3	TCP11L1	-0.0774841509946669	3.33019673666329	-1.7565276168449	0.134006053765511	0.532890148568462	-5.33759405132166
Q96EY9	ADAT3	0.0689607617843664	3.26239671798405	0.525423725677102	0.619784249583833	0.871405506317198	-5.33763256401562
Q02108	GUCY1A3	0.0927759005539422	3.34388840524126	1.39493201369656	0.216765966839094	0.620688672117816	-5.33831289440171
Q9H553-1	ALG2	-0.130585385007212	3.33066234511903	-1.86652686137894	0.115657268534485	0.500506261221513	-5.3385583279931
Q14592	ZNF460	0.0975718657431523	3.40312706321402	0.913953869855812	0.399039011139504	0.762461692120451	-5.34007608925079
P02774-3	GC	0.122666215060377	3.10609889076689	1.26192717979657	0.257851492276952	0.657220158345455	-5.34141651807279
Q9UNK0	STX8	0.0813886551200597	3.28702206609904	1.37925485786925	0.221275928379285	0.62417825873502	-5.34174566050753
Q9NXA8-1	SIRT5	0.05885219244011	3.32676010460219	1.70782684524478	0.143030083085325	0.544503398836867	-5.3428125306196
Q9NVR0	KLHL11	0.0578775551215197	3.25176454834638	1.65831107784679	0.152818990601356	0.549684148722699	-5.34472802469909
Q9UPY8	MAPRE3	-0.0923026343364868	3.31464181269426	-1.69190199771696	0.14610912864023	0.54634515185298	-5.34548219173867
Q96S99	PLEKHF1	0.0846007725991072	3.34041363113419	1.09276283683225	0.32004028727113	0.712828098916316	-5.34575468497791
Q9UFC0	LRWD1	-0.0562510639839185	3.32447553245869	-2.05292853220046	0.0901702481690424	0.461431402796698	-5.34665100427006
Q9Y248	GINS2	-0.2510614415443	3.07574199443452	-1.41824245327728	0.210217402369071	0.614917919375498	-5.34665998427802
Q8TF74	WIPF2	0.0797838754183467	2.99929810113246	1.25485844593574	0.260220165521178	0.658360054727392	-5.34717453861986
Q86VU5	COMTD1	0.136908392317716	3.36536513260407	1.65707289779764	0.153072003566099	0.549684148722699	-5.34765131204352
Q96IK1	BOD1	-0.0801390854389015	2.75133655566741	-1.44773518763473	0.202196208105078	0.6089439564885	-5.34785934977872
Q9H9L3	ISG20L2	-0.068364990090132	3.31468631806226	-1.74203083316796	0.136631632011726	0.533513509594352	-5.34786416039541
O60343-1	TBC1D4	0.0952270192448522	2.69752784107543	1.89460038027754	0.111393413480886	0.493561688805438	-5.35036097075482
P49588	AARS	0.0246669077224782	3.3650219544013	2.74266003840954	0.0367833631721514	0.315782589071777	-5.35101557837049
P50219	MNX1	-0.0754897027980648	3.25060663823948	-1.25037786984106	0.26173159941672	0.660668348208483	-5.35495710030179
Q15165-1	PON2	0.0744219320928976	3.35560812055475	1.90338081884212	0.110092752824282	0.492247105154085	-5.35614391681427
Q66K64	DCAF15	0.0945940087033224	3.20781017742057	1.12150720629862	0.30864088017573	0.703910379407116	-5.35743099694909
Q00653-1	NFKB2	0.0577111337368798	3.39111926430301	2.3385926689922	0.0618264946407841	0.393362210644762	-5.35746245964396
Q6UUV7-1	CRTC3	-0.126207277159427	3.28086803528726	-0.760233356987208	0.478426864511089	0.803340752242163	-5.35776469002287
Q16513	PKN2	0.0777437538019485	3.04146209147055	1.74340816867326	0.136379998052356	0.533513509594352	-5.35815914497881
P46783	RPS10	-0.0473448365252013	3.34749592977603	-2.27446420085681	0.0672519912256631	0.410597534077119	-5.35863353736093
Q9Y3D9	MRPS23	0.120340539353437	3.32526711641605	1.68392321018857	0.147676244019162	0.547180403082038	-5.35911109187973
Q12857-4	NFIA	0.09638417583483	3.36882551931935	0.765893984938308	0.475314212425882	0.801169041105009	-5.36051365322903
Q9UDY4	DNAJB4	0.088315767612979	3.21624070958384	1.4302865733737	0.20690647310677	0.609931334384155	-5.36066745161178
P46060	RANGAP1	-0.0536617925989986	3.28874942840449	-2.54078406470897	0.04755990303186	0.349778630394051	-5.36068698199588
Q13011	ECH1	0.109202443308907	3.365434494724	2.08161357664213	0.0867935450471602	0.455801726411727	-5.36106973663228
Q9UHL9-3	GTF2IRD1	-0.0811273993714635	3.16324090250667	-1.08437485131643	0.323433107997979	0.714230404718271	-5.36121106357986
Q96P47-4	AGAP3	-0.0742721894341746	3.20717180006867	-1.20887690136542	0.276105617780176	0.673677663418635	-5.36393872382707
P48730-2	CSNK1D	-0.103141175664649	3.22972041807879	-0.96071043873924	0.377011149977427	0.747748529147725	-5.36416135281869
Q9NNW7-1	TXNRD2	0.165441234433599	3.26966183893263	1.46125129937839	0.198616838911011	0.60689035526774	-5.36464218154327
Q6PID8-1	KLHDC10	0.0994550779935037	3.33112262324565	0.877526876260793	0.416884170785955	0.772284692829706	-5.36475655859085
P18859-2	ATP5J	-0.0985531049790648	3.3870658440119	-1.37937753024989	0.221240304271187	0.62417825873502	-5.36824863702437
P53708	ITGA8	-0.114357571105983	3.37598898769208	-1.81895903239416	0.123261052331033	0.513788872660651	-5.36997725468432
Q16537	PPP2R5E	-0.064286335495373	3.35650960321009	-1.74496108298307	0.136096837569141	0.533513509594352	-5.37000752369356
Q5T5U3	ARHGAP21	-0.0745531038562219	3.22957740503612	-1.36864199778066	0.224378004541746	0.629231934305223	-5.37106261416761
O95503	CBX6	0.0773224772846242	3.37396167166722	1.02725893240436	0.347343798613846	0.729535578778624	-5.37258893989793
Q8IZ40	RCOR2	0.200800450206241	1.54854692900334	1.31300430388277	0.241302972375174	0.643619935714323	-5.37384128551365
P27448-5	MARK3	0.0855915503281527	3.34020160542308	1.3652221109589	0.225386116530507	0.630480846990456	-5.37424883227741
O60704	TPST2	0.0620397120543673	3.36594599779017	1.57679827946549	0.170375145649754	0.575508406561632	-5.37478069788429
Q6AWC2-6	WWC2	0.0693042111346646	3.3575443790958	0.493139493509362	0.640979506577237	0.879086002063685	-5.37517591617334
Q9ULW3	ABT1	-0.0633309183151133	3.30877929085673	-1.68486915752035	0.147489590806153	0.547180403082038	-5.37743468090971
Q8WVD5-1	RNF141	0.0691462064219724	3.34067526544868	0.652632179086321	0.540294271109548	0.833379476198302	-5.37746162441074
O94913	PCF11	-0.0612587098419186	3.30832506392574	-2.22942947226748	0.0713606282742117	0.418626338101832	-5.37757519872513
P49761	CLK3	-0.0908785761305351	3.26516936106375	-1.48212429382626	0.193206174265941	0.602073742068345	-5.37813402021867
Q8TDX7-1	NEK7	0.0588666346372218	3.39032418865586	2.18851648513468	0.0753218444434754	0.426908464037978	-5.37836506688587
P45973	CBX5	0.0383776465760998	3.27456429283113	2.36311015370467	0.0598763362864764	0.385919256084586	-5.38390444744673
Q15063-1	POSTN	0.0954375231942846	3.37519577778733	0.864017140814518	0.423655202553382	0.774048271733896	-5.38398182875525
P55795	HNRNPH2	-0.0576463850921011	3.30300116830102	-2.07022143393734	0.0881186682365894	0.458462606723184	-5.38442816958227
Q96AY3	FKBP10	0.182112462090223	2.0923081959918	1.66803842387167	0.150845461834931	0.549680798221171	-5.3849934574874
O75044	SRGAP2	0.0631190185662159	3.34243623678117	2.28899874885142	0.0659797337939231	0.406895202351148	-5.38522235726397
O43493-1	TGOLN2	-0.137116449157069	3.40317093137642	-1.71917290683734	0.140875446179118	0.540802382973443	-5.38542541707443
Q9UHJ3-1	SFMBT1	0.0621361471127365	3.28681701709221	0.547475836171235	0.605536042765728	0.863851201708869	-5.38590366857498
Q5T4S7-1	UBR4	0.0281193845283309	3.35934518781234	2.70418044294251	0.0386136196581971	0.325264099426568	-5.38675510947866
O96007	MOCS2	-0.195355193868931	3.32582388109869	-1.44347693592588	0.203336372527157	0.609504350614539	-5.38744810649983
P49458	SRP9; SRP9P1	0.0875330949682076	3.3700317133692	1.81945747684346	0.123178826787997	0.513788872660651	-5.38759695613466
Q8N3X6-1	LCORL	-0.0150199570254383	3.18174914214027	-0.111462871539178	0.915204853201271	0.984704326570428	-5.38826465894913
Q9NSC5-1	HOMER3	0.0926659752760763	3.39936393443038	1.69975380466134	0.144582922789758	0.546171719887872	-5.38873944077955
Q9BVN2	RUSC1	-0.0856471370110048	3.31592987051262	-0.984261736877758	0.366287032882751	0.743088540735469	-5.38914443890331
Q8NAP3	ZBTB38	0.231292035395929	3.50849610749436	1.90332411813488	0.110101102422983	0.492247105154085	-5.38933053972982
P42126	ECI1	0.113675939448068	3.39977655149319	2.08228150064333	0.0867164953714493	0.455800665830394	-5.39177961685679
P78314-4	SH3BP2	-0.0332243097620785	3.33636965508743	-0.219983202312625	0.833820237680188	0.958764905522789	-5.39269725240558
Q5XPI4	RNF123	0.0522194147996508	3.36389886998179	2.0036241547006	0.0962941446351102	0.471098428120241	-5.3942763737418
P61019-1	RAB2A	0.0513656698148963	3.31724784433604	1.97084943079341	0.10059980990518	0.478644102896043	-5.39430510179021
P63172	DYNLT1	0.0891828311512192	2.6962599204238	1.27288954648308	0.25421620411216	0.656449856262107	-5.39493192884778
Q6BDS2	UHRF1BP1	-0.0648790628289078	3.34569727355754	-1.76871098312055	0.131838273627643	0.530403420426105	-5.39506009854649
P08579	SNRPB2	0.0957618571144439	3.33181502679184	1.63229668637326	0.15822167473298	0.557424579431389	-5.39710043736737
Q99933	BAG1	0.0662388376187562	3.41471325501082	1.97477115134004	0.100074393578465	0.478571009778351	-5.40003383721153
Q99700-1	ATXN2	-0.0686993923271668	3.12763783126601	-1.98089258022223	0.0992598725814363	0.477643912263152	-5.40031009217235
Q9NWX6	THG1L	0.0877707240145073	3.35616419818708	1.62089539883877	0.160647736565058	0.561964039078295	-5.40201818641759
Q8WUX1-1	SLC38A5	-0.0599110199709384	3.43982069889024	-1.5754301020136	0.17068587553175	0.576268435622515	-5.40271297283474
Q9H3G5	CPVL	0.429779757984226	0.962761754392161	1.14918090072093	0.297994949271287	0.696023164604137	-5.40300950514494
Q9NZ09-4	UBAP1	-0.0603130528017793	3.35081415329379	-1.76212233251692	0.133006222787085	0.532676799798424	-5.40329264028506
Q9UNE7-1	STUB1	-0.0540836942087777	3.28081079370869	-2.06595360065216	0.0886204686295081	0.458942057109055	-5.40438761953941
Q86VW0	SESTD1	-0.130726404224095	3.16334857068158	-0.985041061218003	0.365936395342205	0.743088540735469	-5.40510237244105
Q96S82	UBL7	-0.120867377531544	3.32037072986238	-1.2195441284876	0.272345916695991	0.671154180454097	-5.40560583698087
Q5BKX5-1	C19orf54	0.071396518203718	3.36914626001495	1.36105961596529	0.226618752554142	0.63214909285108	-5.40590896949952
Q9Y224	C14orf166; RTRAF	-0.0455967621673395	3.31510915518949	-2.33778467632415	0.0618918981729111	0.393362210644762	-5.40597476384853
Q9Y314	NOSIP	-0.12290177093172	3.24627881432827	-1.90090062595756	0.110458580352479	0.492247105154085	-5.40621346004858
Q00978	IRF9	-0.107683142793715	3.3873324681205	-1.19909063756069	0.279594868492108	0.67664382578019	-5.4074664134388
Q13153	PAK1	-0.0670096530980607	3.3618667942723	-2.01264499753974	0.0951425488547475	0.469565501763298	-5.40763194761133
P11166	SLC2A1	-0.0772872775988281	3.34552576196147	-1.80647069487281	0.125339229916885	0.51719181157506	-5.40788986116687
Q6V1X1	DPP8	0.0535457573108256	3.38724637652796	1.87153293240124	0.114885031876664	0.499965389993023	-5.40826741607738
Q5R372-5	RABGAP1L	-0.169332835279061	3.26231632785925	-1.43458309982146	0.205737187078903	0.609504350614539	-5.40827281897715
Q08379	GOLGA2	-0.04750669849105	3.27641640655556	-2.04573400815956	0.0910382477650962	0.461672708865106	-5.4089981411375
Q9UL63-1	MKLN1	-0.0606880612177732	3.29616928560544	-1.9803075144059	0.0993374277512476	0.477643912263152	-5.40934124800897
P00568	AK1	0.118649366254749	2.94763388770824	1.79627997462396	0.1270610205744	0.52038864515628	-5.40965535566152
P37840-1	SNCA	0.139028273600536	2.07473033823568	1.4397568631416	0.204337365443327	0.609504350614539	-5.41066025354745
Q96MH6-1	TMEM68	0.100355786089807	3.25146267531725	1.28825560995268	0.249197950507399	0.651407731683885	-5.41132291067085
P41162	ETV3	0.128747990738448	3.36616691471026	1.24205907281466	0.264558517074842	0.664018316209866	-5.41175982389023
Q14690	PDCD11	-0.0433206692443745	3.26862527621651	-2.49956089794366	0.0501538788168446	0.354928140129403	-5.41208013771167
Q8NFP9-1	NBEA	-0.0683123960949932	3.28933663824431	-1.47078177778786	0.19612887550916	0.60615094306785	-5.41311050703202
Q9BV94-1	EDEM2; MMP24-AS1-EDEM2	0.0894528965963404	3.40308907243296	1.56328463989431	0.173468280284922	0.580414890852953	-5.4134434064583
O43502	RAD51C	-0.0758757673536851	3.05226082688043	-0.912017711964083	0.399972410149443	0.763140627119218	-5.41638177794639
Q9UL03	INTS6	-0.0964329995970367	3.30001719671179	-1.71722099795527	0.141243821760756	0.541609224116257	-5.41640037032728
Q9BTV5	FSD1	0.145583778811153	1.75160505333041	0.462081453384338	0.661733574223888	0.887150595519141	-5.41930175924298
Q9NWQ8	PAG1	0.11059353767033	3.18207733907899	0.79049054918149	0.461956317167386	0.792362940545845	-5.41934323800869
Q8NCW5	APOA1BP; NAXE	0.0602899486753458	3.39676925979739	2.24093668498413	0.0702863065795861	0.4162683284828	-5.42034575516153
P13051	UNG	-0.113483287053938	3.3438178602552	-1.79021084530057	0.128097652332883	0.521818031578311	-5.42110341613037
Q9NYM9	BET1L	-0.0754445096262747	3.27413337151856	-1.38255540425901	0.220319291199768	0.62331072198857	-5.42145554799131
O95197-3	RTN3	0.0990359935452105	3.11783796401372	1.60920079200308	0.163173745806572	0.565468344793696	-5.42217912409155
Q9Y4X4-1	KLF12	0.085735959898484	3.3536836439848	0.869472225284673	0.420911174913415	0.773978201764983	-5.42351775853195
Q8NCP5	ZBTB44	-0.0754041150985808	3.39321162354436	-0.713932748074245	0.504423469477469	0.814682759930693	-5.4242119788793
Q96PQ7-3	KLHL5	-0.0786343376436422	3.36097197737091	-0.674337061115483	0.527406533565086	0.826628082186413	-5.427164827548
Q9GZT3-1	SLIRP	0.110359181765701	3.34932131239246	1.96212938543484	0.101778214569124	0.480996514934577	-5.42737770998733
Q96H55-1	MYO19	-0.0603880882486349	3.33882193571891	-1.7499203479772	0.135196457580571	0.532945725000488	-5.42773381126184
Q5U5X0	LYRM7	0.161797140997672	3.22029116007285	1.25981240228602	0.258558110253342	0.657596525585684	-5.427974844995
Q9HCJ0-2	TNRC6C	0.0425334308763139	3.35024696237935	0.35909553617165	0.732904253130375	0.919787504025364	-5.42798857148105
Q9Y6Y9	LY96	0.0858205182336787	3.40338374690173	0.905514011200814	0.40312016910533	0.764448755162372	-5.42981090535788
Q0IIM8	TBC1D8B	0.0832148747341921	3.32246505973279	1.39414010670909	0.216991725599058	0.620688672117816	-5.4300173545538
Q9UHI6	DDX20	-0.0938626252523602	3.1671199944584	-2.00387982054523	0.0962613102610628	0.471098428120241	-5.43102896561901
Q6NVV7	CDPF1	0.0761708217444497	3.32068745872124	0.833291293903894	0.439362981782792	0.779038665958751	-5.43122493950204
Q5VUJ9-1	EFCAB2	-0.104558542221873	3.41403062082482	-0.860105920728304	0.425630936582859	0.774048271733896	-5.43327406313016
Q7Z7K6-1	CENPV	0.237679757766072	1.57029982468864	0.995018006569357	0.361471377565524	0.738768805106554	-5.43355293721781
Q9Y6Q9-1	NCOA3	-0.047849027530234	3.37135292821347	-1.93664491971667	0.105303516777879	0.487030364683234	-5.43390551394391
P16949-1	STMN1	-0.0732536653963814	3.29833179829829	-2.38326858523962	0.0583217998555181	0.382059038401658	-5.43466744919578
Q15233	NONO	-0.032891566128825	3.2405667519354	-2.60296694772322	0.043916044528197	0.344060199671958	-5.43817303514933
Q8IWD4-1	CCDC117	-0.0847225222042589	3.29222742294672	-1.35709590843922	0.227798274294228	0.632482820446127	-5.43854654136532
P62829	RPL23	-0.0802029512789453	3.29374931227067	-2.26184280075477	0.068377754145013	0.412598979679333	-5.43908897902194
O96018	APBA3	-0.0620921601899997	3.35743138772212	-0.532237781560022	0.615361405385376	0.8698163951036	-5.4392666943737
Q9ULG1	INO80	-0.104572882068981	3.35328822533273	-1.44868450562569	0.20194284289642	0.6089439564885	-5.44010355892616
Q8IZD2-1	KMT2E; MLL5	-0.101782807645618	3.37690201355507	-1.56727415002994	0.172549545236001	0.578781458620958	-5.4401293058253
Q68E01-2	INTS3	0.0452099209921152	3.29059390536374	2.07628428792741	0.0874108584402483	0.457201677080758	-5.44129445948711
Q9C005	DPY30	-0.0780726624317896	3.3903920082369	-1.21935349629994	0.272412707838308	0.671154180454097	-5.44169375373871
Q13588	GRAP	0.0492680919610879	3.41787874540388	1.9058254445426	0.109733373526254	0.492247105154085	-5.44244271458395
Q9Y483	MTF2	-0.19754700076274	2.96792989114861	-1.39528599141548	0.216665124394768	0.620688672117816	-5.44275381936548
P17050	NAGA	0.0679156442678914	3.33976218260683	1.43479155173707	0.205680614981835	0.609504350614539	-5.44355821150665
Q96F10	SAT2	0.0796913086343433	3.4289446020542	1.02455838623147	0.34850955994087	0.729535578778624	-5.44448690746999
Q9H0A8-1	COMMD4	-0.154154102986845	3.38893987052849	-1.65462926138846	0.153572544858512	0.549684148722699	-5.44460076008243
Q9H4A5	GOLPH3L	0.0603886215535905	3.34526357260743	1.91576422384897	0.108284507321315	0.492247105154085	-5.44492437879928
Q01650	SLC7A5	-0.210873264576069	3.13806965520488	-1.49265758551782	0.190528896593876	0.598228624300585	-5.44548085899828
Q9UM82	SPATA2	-0.0364572805769986	3.28534876998293	-0.248334605327876	0.812885903618628	0.949475191482349	-5.44599752261165
Q8IZ83	ALDH16A1	-0.0568548023471167	3.37716288477288	-1.98332147860515	0.098938564724364	0.477214559177635	-5.44775564235799
Q9NPI8	FANCF	-0.0403727262669075	3.38396939413714	-0.297740014068502	0.776825771043642	0.934849959845149	-5.44902489722704
Q9Y448	C15orf23; KNSTRN	-0.104805351791258	3.20922480821152	-1.57490553958637	0.170805154819263	0.576349829320317	-5.44991972713144
Q15361	TTF1	-0.0640161353488231	3.2547991648472	-1.50676709247043	0.186997687544594	0.594767954515554	-5.45006289789404
Q9H7D7	WDR26	0.0929509551709493	3.31384472612276	2.08633384874237	0.0862505440374611	0.455440814626719	-5.4504463990555
Q96S38	RPS6KC1	0.0674334287111534	3.35399152005508	1.23171495463032	0.268111484213695	0.668296130989217	-5.45128097459276
O14617-5	AP3D1	-0.127947997997648	3.35982120233432	-1.40432688499899	0.214104216216743	0.619298948770275	-5.45263526427265
Q96LB3-1	IFT74	-0.0709751470041973	3.10041877787868	-1.28820838415255	0.2492132360688	0.651407731683885	-5.45332906645582
P35612-1	ADD2	-0.0559637545781148	3.1743055647073	-1.98259046724708	0.0990351547237134	0.477214559177635	-5.45361680293695
Q96SZ6	CDK5RAP1	0.106551057537726	3.17062787276771	1.4126429895782	0.211773451730269	0.616735378040666	-5.454434124745
Q7L775	EPM2AIP1	-0.0701977006123325	3.2842564225654	-0.719208846168855	0.501413002009909	0.812776835527544	-5.45635625391294
O96006	ZBED1	-0.0762247385572627	3.29907556886771	-0.889255002852824	0.411073140984492	0.767744269515547	-5.45640878241447
Q92543	SNX19	0.136776959055457	3.34400685040922	1.2881605368441	0.249228723654641	0.651407731683885	-5.45690581782235
Q96RE7	NACC1	-0.0584286399322673	3.33656736570799	-1.90342224756916	0.110086652543582	0.492247105154085	-5.45783759126373
Q9NZ63	C9orf78	0.107269680811755	3.32295990553134	2.17496195372504	0.0766844036816505	0.429918733568019	-5.45889958453022
O60941-1	DTNB	-0.0858704051102486	3.30866324714066	-0.81343015823006	0.449744098348919	0.783109536085152	-5.45989333391328
O75582-1	RPS6KA5	0.0631890798746929	3.30304114898081	1.55902606414864	0.174454164854314	0.580720992534269	-5.46099107339617
Q9NRN9	METTL5	-0.0692329284346537	3.27487875735694	-1.69176265759521	0.146136355702419	0.54634515185298	-5.46149026164852
Q8N9T8	KRI1	-0.0886409780411356	3.20089811897121	-2.03464539885836	0.092392960371413	0.463579436397911	-5.46245155864894
Q9NUU6	FAM105A	-0.0168236377654712	3.33356758290059	-0.121652788863553	0.907496030576103	0.982814330704726	-5.46262924022563
O75564	JRK	0.0638363451137963	3.31584837583753	0.528628615004317	0.617701798458213	0.871034605538712	-5.46288358230568
O43347	MSI1	0.15809366716585	1.50812761096959	1.32836370605782	0.236517912130231	0.639674353827363	-5.46296080847771
Q69YI7-1	NAIF1	0.0711821606220843	3.35795115313615	0.737396277541953	0.491130048248793	0.808306633651617	-5.46373013520427
Q96GC9	VMP1	0.0850693260460538	3.19697224395859	1.27550610904291	0.253355327942198	0.655843039589025	-5.46394912824309
Q9NS00-1	C1GALT1	0.0816709485445429	3.36648997403203	1.23119620974391	0.268290769377711	0.668296130989217	-5.46558046215622
Q6PIY7-1	PAPD4	-0.0741600861857363	3.34958078157649	-1.39420285694325	0.216973828668896	0.620688672117816	-5.46656612606923
P62341	SELT; SELENOT	-0.136586066656641	3.25664525561304	-1.06701789048953	0.330549720428951	0.719545084431155	-5.46819869579339
P08754	GNAI3	0.0813460705832009	3.2616837482403	1.51489525328255	0.184991751239458	0.592465458820377	-5.46858507823923
P02751	FN1	0.248175163267236	3.30299955547077	1.71479347270433	0.141703285678306	0.541731482539062	-5.46945574095501
Q9Y3A3	MOB4	0.094121273653323	3.3172326350031	1.61643765172176	0.161606091703582	0.563441985700975	-5.46956843724374
P23396-1	RPS3	-0.0331199944607464	3.32984925814966	-2.50754959210515	0.0496395750716964	0.354928140129403	-5.46986545058242
Q9NW68-3	BSDC1	-0.0507226924916888	3.34535320281579	-1.69992990570599	0.144548873440338	0.546171719887872	-5.47066252932237
O60711-2	LPXN	-0.0750132947734341	3.41695712321378	-2.19165521548559	0.0750099495776056	0.426218834370807	-5.4720106385659
Q9H1E3	NUCKS1	-0.23857554486872	3.20938252900091	-1.91651871795386	0.108175314075092	0.492247105154085	-5.47202130738012
Q9HC07	TMEM165	0.064941824704662	3.36100377165435	1.75682380386135	0.13395293547136	0.532890148568462	-5.47204739579367
Q92785	DPF2	0.0435663112763192	3.30577165573641	2.00483736675929	0.0961384376203428	0.471098428120241	-5.47268585760197
Q9NZI7	UBP1	-0.0493237227517928	3.28499082122671	-1.80817177074121	0.125054103564562	0.51719181157506	-5.47336348233019
Q9HAW0	BRF2	-0.139114300164275	3.27205633861576	-0.843776629524353	0.433954525412911	0.7761400602522	-5.47350505721112
Q8WVC6-1	DCAKD	-0.0839283320533708	3.08577026065347	-1.40959928071923	0.212623765508965	0.617414971265304	-5.47354810847028
Q9NXW9-1	ALKBH4	0.105116216136263	3.31905384573027	1.46103815210205	0.198672819950785	0.60689035526774	-5.4737097638524
Q6NUN9-2	ZNF746	-0.1153224528112	3.25463521469152	-1.06559114391608	0.331140486734318	0.720131462901354	-5.47402596214453
Q9Y4D8-1	HECTD4	-0.0811191631226316	3.23222615562351	-1.2999762816217	0.245430352911016	0.646718452443449	-5.47437199086784
O76071	CIAO1	-0.106697553157113	3.35105435563839	-1.76131614079784	0.133149838638189	0.532676799798424	-5.47545565756781
Q96GS6-2	ABHD17A; FAM108A1	0.079925861635692	3.38316547806656	1.17681060199326	0.287682969035657	0.685017682556742	-5.47568340798076
Q86YC2	PALB2	0.0663518750686899	3.24601004338125	0.808462906461342	0.452368314317206	0.78386307154076	-5.47592066056622
Q96KN1	FAM84B	0.0733850215399674	3.17183614006764	1.24417229167673	0.263837836687867	0.66330469161587	-5.47592414691018
Q92791	LEPREL4; P3H4	-0.0676746858643498	1.95213260579888	-0.995061625895764	0.36145195353325	0.738768805106554	-5.47622698587834
Q99569	PKP4	0.0404123062919682	3.31974791488686	0.311195211059636	0.767107324877848	0.931947239634818	-5.4765879292904
Q9NZM5	GLTSCR2; NOP53	0.0724242546208179	3.35976900743182	1.15358306953325	0.296330881142243	0.694309174752144	-5.47764095370672
Q8NEZ3-1	WDR19	-0.0723769209304391	3.21712042499891	-1.42454787800467	0.208477925445964	0.613217945951746	-5.47859758243622
O00214-2	LGALS8	0.0925687778106034	3.42892757905566	1.1658358943027	0.291741352998	0.68955181956841	-5.47879430173961
Q8NEC7-1	GSTCD	0.060688393771067	3.2713802013314	1.66479544202581	0.151500624837955	0.549684148722699	-5.47923028991674
Q9HC52	CBX8	-0.0488156380582078	3.2457094234658	-1.81406294388404	0.124071662347123	0.515224417244935	-5.47962640875147
Q6R327-3	RICTOR	0.040951261535245	3.34414454226153	2.0454654569768	0.0910708140367644	0.461672708865106	-5.48150889144503
Q99519	NEU1	0.0634983376210974	3.32011213616324	1.61792208370013	0.161286344079521	0.563203535014306	-5.48167703900275
O75157	TSC22D2	-0.0509588785765166	3.22259314806514	-0.477412841551811	0.651444949453061	0.88143488315891	-5.48312401699341
Q9Y371-2	SH3GLB1	0.108779324837587	3.38492517656775	1.74558736980498	0.135982804638095	0.533513509594352	-5.48335551781308
O15321-1	TM9SF1	0.0789098212598098	3.20370267668738	1.26509818866442	0.256795185759623	0.657220158345455	-5.48416798206445
O00291	HIP1	0.0778554052862611	2.93907844471594	1.42712719509866	0.207770246127306	0.611752779004709	-5.48507737368918
Q05209-1	PTPN12	0.0918909840220553	3.34614244446163	1.88167114055375	0.113337025564246	0.496957530091708	-5.48546923116208
Q9UHA3	RSL24D1	-0.064469594789981	3.30563069662157	-1.63093206239746	0.158510162527189	0.55814840885687	-5.48568588113063
Q00169	PITPNA	-0.0696544136999631	3.3450390464992	-2.04784862589439	0.0907822344950477	0.461602254368919	-5.4857106675585
Q96JY6-5	PDLIM2	-0.0576548890302991	3.23349566884157	-0.565402098441325	0.594094505909881	0.856607307749081	-5.48701349346835
O60268-1	KIAA0513	-0.0786254443491462	3.3669106756276	-1.09235262908694	0.320205510349184	0.712958410257441	-5.48740769314022
Q9NWZ8	GEMIN8	-0.0917252601628973	3.29510749996642	-1.30679224637999	0.243263098985672	0.646585429569666	-5.48930940602556
Q15043	SLC39A14	-0.0909303129228684	3.20095453213871	-1.24507669230786	0.263529938412254	0.66330469161587	-5.49160772705338
Q8IWZ8-1	SUGP1	-0.039389921360567	3.30593834027703	-2.14010620791796	0.0803076927956921	0.439571288174024	-5.49187871830337
Q9BPX6-3	MICU1	0.0740459215151086	3.27773704925794	1.2323351834891	0.267897264067992	0.668296130989217	-5.49246266149425
Q86SF2	GALNT7	0.0555569415611195	3.29148823414036	1.86884819223379	0.115298530598641	0.500506261221513	-5.49302783222875
Q9H6A9-1	PCNXL3; PCNX3	-0.0693972397959201	3.31482482219801	-0.615692495789055	0.562690488686363	0.843752054451062	-5.49312357742288
Q14781-1	CBX2	0.0165437469053717	1.87836086346892	0.121984748520496	0.907245082508556	0.982814330704726	-5.49394737210094
P14854	COX6B1	-0.0519539507312291	3.35345229108388	-1.70290194519503	0.143975415892976	0.545856032505688	-5.49396030245878
Q9UBW8	COPS7A	0.0935164852625061	3.33583795202897	1.56050499120039	0.174111176325077	0.580720992534269	-5.49509387362795
Q8WZ42-12	TTN	-0.0695322364537294	3.39225760715827	-0.760025671085827	0.478541339506889	0.803340752242163	-5.49596418336664
Q9H1J7	WNT5B	-0.103620937219471	3.43025521369148	-1.34420126908447	0.231674517225326	0.635863683173507	-5.4985296241128
Q6PJG2	ELMSAN1	-0.0558722510661306	3.29790948793381	-1.49993544828538	0.188699628227379	0.597026083013214	-5.49936506318397
Q16875-4	PFKFB3	0.079199518422825	3.2736745053682	1.11784541683828	0.310073617123911	0.704734170498007	-5.50023467631759
P10914	IRF1	0.085568476559197	3.34930526074974	1.0283267643387	0.346883724695025	0.729535578778624	-5.50105881418746
Q2M2Z5	PLK1S1; KIZ	-0.0631885053605872	3.2502774785206	-0.670283534574372	0.529797960405293	0.828793702607048	-5.50157407627052
P36508	ZNF76	-0.0704160283703148	3.2556998091053	-0.816285424751181	0.44824070291481	0.78265766773133	-5.50179411405897
P20339	RAB5A	0.0499456972652382	3.33026567649689	1.79871167894334	0.12664803145205	0.519419199158437	-5.50534900861992
Q1RMZ1	C7orf60; BMT2	0.0425893556734178	3.34519048865197	0.34934588219307	0.739813820599922	0.922468651840601	-5.50603503554491
Q9GZR2-1	REXO4	-0.0748071250453812	2.95594913828595	-1.41543152628705	0.210997202698508	0.615683610906003	-5.50670522627034
Q6P1M3-1	LLGL2	-0.0764483609244775	3.31338324926026	-0.828068634954138	0.442075476621613	0.779751076843475	-5.50773973200917
P52747	ZNF143	0.0607562386821649	3.30825565420911	1.54760783316212	0.1771241632512	0.584104203805314	-5.50882702848122
Q53EL6-1	PDCD4	0.0475155153720344	3.32505690633286	2.00025422832138	0.0967280093665253	0.472533196919901	-5.50947986357002
O43159	RRP8	0.0652043787526957	3.32626714660311	1.86509973033061	0.11587837591699	0.500506261221513	-5.51013754697154
Q9HBI1-1	PARVB	0.0622406404334454	3.41372298978165	1.9107997383506	0.109005782592315	0.492247105154085	-5.51049546407319
Q9NXG2	THUMPD1	0.0475773455384434	3.34749195078591	2.03638612977551	0.0921789261485666	0.463335002765982	-5.51055929206174
Q9C0B0	UNK	0.0465735135269327	3.34622768385699	1.80844451896268	0.125008447220942	0.51719181157506	-5.51142601058577
Q8N6R0-5	METTL13	0.0444344977925348	3.3088899407556	2.07763848008018	0.0872535676378735	0.457146127561797	-5.51290779857006
P21281	ATP6V1B2	0.0418605542434492	3.38309374321166	2.29007849733748	0.0658862380420682	0.406895202351148	-5.51292249350652
O75385	ULK1	0.00375211427312462	3.24751799399354	0.0313679992970645	0.976083122841728	0.994059930627651	-5.51443259343896
P35568	IRS1	0.0638286330816433	3.40181507063919	1.42133503437141	0.209362568574718	0.613217945951746	-5.51479557635431
O75312	ZNF259; ZPR1	0.0546192768058111	3.38275269743039	2.01735178116278	0.0945473081424097	0.469054279061769	-5.51723417712499
O60303	KIAA0556	-0.0651169857375167	3.31779698329523	-0.625852892755272	0.556472830677406	0.840020293692685	-5.51734935903978
Q8IX07	ZFPM1	-0.0247143870896396	3.30965554587934	-0.184787391076958	0.860019885103372	0.967054812255749	-5.51758112066758
Q9H063	MAF1	-0.0850567292272415	3.3183435539012	-1.30450742818842	0.243987660011591	0.646718452443449	-5.51780796654793
Q9UJY5-6	GGA1	-0.0531152591950386	3.35241725953771	-1.65062410942582	0.154396399603053	0.550877175229151	-5.51817147348498
P45983-4	MAPK8	0.1089518521829	3.29966450803485	1.43670399379745	0.20516227293587	0.609504350614539	-5.51820844018247
P25786-2	PSMA1	-0.0935802082213326	3.31893223309158	-2.37098229305137	0.0592640961506117	0.384265782457218	-5.51826737891035
Q05397-5	PTK2	-0.0681103490913512	1.69220340883223	-0.401318799080184	0.703310130650991	0.907418560122065	-5.51964241428376
Q9UPV0	CEP164	-0.0897920595807151	3.21557345428176	-1.23648841089683	0.266466688369993	0.666364984830019	-5.51976768130634
O15085-2	ARHGEF11	0.0653305068486414	3.28247164249945	1.32016328014515	0.239061830780885	0.642749156701407	-5.51983468241607
Q9BZ29-4	DOCK9	-0.0554408615927209	3.35923902524225	-1.88339095394923	0.113076525860454	0.496893719095826	-5.52197724862802
P57764	GSDMD	-0.0560890778234959	3.42753184706951	-1.75345110001059	0.13455903639366	0.532898650094154	-5.52215771809685
Q9HCC9-1	ZFYVE28	-0.0689203147071044	3.43233239134547	-0.468169304392841	0.657638054006254	0.88395180944412	-5.52246530750233
Q6RW13	AGTRAP	0.0795074061567747	3.3533423297275	1.30521164323049	0.243764131580938	0.646718452443449	-5.52247546107855
Q9UFF9	CNOT8	-0.073815269323099	2.98936751858975	-1.02097958158599	0.350059383596998	0.73059944533338	-5.5235877295636
Q9NPD8	UBE2T	-0.11015923050756	3.27723297706199	-1.67168766364259	0.150111542845753	0.549205953789125	-5.52368659749306
Q9UFW8	CGGBP1	-0.0567089576442488	3.2929608593629	-1.86847872877383	0.11535555216158	0.500506261221513	-5.52445102156223
O75907	DGAT1	0.135330860810323	3.29410818458801	1.12370920540999	0.307782031042052	0.703910379407116	-5.52646711505082
Q5T4F4-2	ZFYVE27	0.107434013504966	3.15686428070375	1.00987210362141	0.354905471043648	0.734496247052827	-5.52725019419357
Q96EK4	THAP11	-0.0773942907424643	3.31743033914631	-1.22228665769354	0.271386623861823	0.670720093613002	-5.52891083715714
Q8N573-1	OXR1	0.0514164043900449	3.34798779057954	0.503263815804955	0.634290457376887	0.87580106968162	-5.52959920663269
Q96EY4	TMA16	-0.0776930040500583	3.34505347097945	-1.55706664856586	0.174909586252673	0.581187463564244	-5.53010453001466
Q96NT3-3	GUCD1	0.0577382621636005	3.34197057624074	0.636788362855726	0.549829442088355	0.836567114014921	-5.53040793534213
Q92611	EDEM1	0.0725294080822273	3.38325696829652	1.42204429883497	0.209166974991457	0.613217945951746	-5.53064645554221
Q8IU68-1	TMC8	-0.0863751178728855	3.3815483502865	-1.67375990944381	0.149696340929261	0.549002994332907	-5.5313538788378
O75113	N4BP1	0.0500492485647012	3.35197026296531	2.00395691055046	0.0962514120844818	0.471098428120241	-5.53170376665598
P56192	MARS	-0.0998757339814294	3.30123924279361	-2.20879638184816	0.0733303139854787	0.423112764472436	-5.53244913756917
P19338	NCL	-0.126936321743924	3.27719914532009	-2.65251522855105	0.0412280593847034	0.3343003801978	-5.53266497975848
Q9H944	MED20	-0.0834563505146403	3.25187077350824	-1.38151557987075	0.220620263287272	0.623375119721328	-5.53334392294976
P35241-5	RDX	0.0706680127251541	3.36571193812491	2.05132084406709	0.0903634679258971	0.461431402796698	-5.5344589174216
Q9BTE1	DCTN5	-0.103706620794291	3.32428419839318	-1.34173209037294	0.232423625528043	0.636914639543216	-5.53516402914093
O43324-1	EEF1E1	0.084444915300158	3.3503049423475	1.9446006814228	0.104189817668868	0.483953841224214	-5.53522087271969
Q9NS69	TOMM22	0.172890361443702	3.1749177542083	1.48918987584553	0.191406393493564	0.598511366041306	-5.53540479254053
Q6UXT9	ABHD15	-0.0753061168600396	3.3212648286108	-0.816399926025449	0.448180491008105	0.78265766773133	-5.53646514506999
Q13188-2	STK3	-0.0655882644856394	3.29774054909744	-1.54118678748523	0.17864279677574	0.585774087769037	-5.53709090109006
Q6P1R4	DUS1L	-0.0640313682523257	3.36866589731804	-1.95751624481293	0.102407315327164	0.482623168725667	-5.53842193434627
P53671-3	LIMK2	0.0627242208662668	3.31965756818597	1.3947843095183	0.216808058191099	0.620688672117816	-5.53928873590251
Q9BU70	C9orf156; TRMO	-0.109039985199693	3.31942700824036	-0.818474495736086	0.447090580529803	0.782548377469743	-5.54037683282999
Q56NI9	ESCO2	0.0620605325775154	3.39983568708224	1.74271394549932	0.13650677250692	0.533513509594352	-5.54085296531325
Q8IWB7	WDFY1	0.0653683969737772	3.30312098517654	1.7569021662694	0.133938885426502	0.532890148568462	-5.54205923899596
Q13217	DNAJC3	-0.064726762682377	3.39913457857923	-2.15525515863603	0.0787114961528755	0.436147626784173	-5.5427095667394
P49759-3	CLK1	0.0858034631544965	3.20560239070514	1.25491949863701	0.260199624433599	0.658360054727392	-5.54291512007605
Q9Y3U8	RPL36	-0.0720641243710521	3.26130590040918	-1.86689017185786	0.115601048352973	0.500506261221513	-5.54465754794592
P31629	HIVEP2	-0.0322470835680082	3.29352780648515	-0.303067049227056	0.772972623508603	0.93328258394208	-5.54469511039052
Q5W0V3	FAM160B1	0.080000702286244	3.37067935657845	1.39451080613482	0.216886018611086	0.620688672117816	-5.5451065853791
Q9BVC6	TMEM109	0.0819880205787566	3.31869482314628	1.65966602340696	0.152542586084825	0.549684148722699	-5.54562012225619
O15304	SIVA1	-0.0714282033629036	3.26150040440923	-1.26370003598136	0.257260451813186	0.657220158345455	-5.54624213267677
Q9NXR7-2	BRE; BABAM2	0.0672821705691878	3.2810458761975	1.52806188965957	0.181785785047273	0.589182279213002	-5.54640708054141
Q6PJ61	FBXO46	0.0852904853648676	3.32274403909282	0.97965364697477	0.36836585551317	0.744066673605656	-5.54679031532703
Q96AP0	ACD	-0.0639619948703911	3.33854249195955	-1.04927790006947	0.337957953428742	0.724682099018383	-5.54787267897082
Q6P9G4	TMEM154	-0.166044592409013	3.27427876287812	-0.746494487048774	0.486041232894753	0.806712766377268	-5.54792128786524
Q8N3Z6	ZCCHC7	-0.0466381286794186	3.21798517674483	-0.386462415647562	0.713660267248055	0.911543728038667	-5.5488516971534
Q9BSJ6	FAM64A; PIMREG	-0.0638148775309293	2.76371105261357	-1.08538763784626	0.323021850541645	0.713726528051037	-5.54899754986921
Q9NVC3-1	SLC38A7	0.0988784801240277	3.30043972568669	1.24290993198852	0.264268134739868	0.663830493916814	-5.55016258329051
Q9UHG3	PCYOX1	0.0574201138134452	3.3912236234661	1.95068290167285	0.103346489836896	0.482623168725667	-5.55083387756387
O00635	TRIM38	0.0597929162294291	3.3916078072116	1.54375714438194	0.178033394486806	0.585203167599174	-5.55133769224558
Q9BZG8	DPH1	-0.0733247989680712	3.31553355221997	-1.5598607904559	0.174260497830957	0.580720992534269	-5.55201858853131
Q4AC94-5	C2CD3	-0.075370720319832	3.31537138005357	-1.2038421187376	0.277895945473887	0.675549068333562	-5.55204263615191
Q9Y5K8	ATP6V1D	0.200623044199054	3.3644899344404	1.51257527313452	0.185562198734729	0.592812701587832	-5.55241343880698
P09917	ALOX5	-0.0717686769420475	3.39923756441041	-0.937618739489698	0.38776712680167	0.756659846101745	-5.5524724949601
Q68D06	SLFN13	0.0713327518285107	3.41789509850062	1.84671512506586	0.118765127024025	0.505277964465503	-5.5527005247825
Q6P158-1	DHX57	-0.048934370072573	3.19664655877043	-1.80603434046487	0.125412474392643	0.51719181157506	-5.55295195590293
P12109	COL6A1	-0.0715688241222666	2.21637202458333	-0.613549144753852	0.56400763553894	0.845040576367414	-5.55312037699558
Q16877	PFKFB4	0.0805645026590406	3.38955627673317	1.54514564200455	0.177705025947611	0.584695636035164	-5.55323240766645
P51946	CCNH	-0.0634886238437849	3.20520707226782	-1.43850680824886	0.204674763322699	0.609504350614539	-5.55341456409794
O00463	TRAF5	-0.0865896944217107	3.30202666594767	-1.22661202621625	0.269879741106772	0.669913600577319	-5.55370766262947
Q6PCD5	RFWD3	-0.0653580793714985	3.16261948294087	-0.768154583574803	0.474075176474157	0.800269109807946	-5.5540522628123
Q96QE5	TEFM	0.0743227704163441	3.33269489663731	0.812944466771572	0.450000198563495	0.783247367877735	-5.55462651800741
Q96D53-1	ADCK4; COQ8B	0.0677806237087176	3.27062896362959	1.30023813721303	0.245346770029963	0.646718452443449	-5.55472296653408
O76064	RNF8	-0.0746977086001113	3.18124590304045	-1.03160702798947	0.345473557001649	0.729535578778624	-5.55578220637817
Q8N954-1	CCDC75; GPATCH11	-0.106561300730826	3.35697351217051	-1.54387331809514	0.178005898080949	0.585203167599174	-5.55656845350729
Q9UNS1	TIMELESS	-0.07230000452199	3.18571116552859	-1.81833325083149	0.123364361867642	0.513788872660651	-5.55744818284957
Q16769	QPCT	0.0678944976751553	3.40951125810159	1.38796734072063	0.21875894816133	0.621512108850575	-5.55854489935321
O43896	KIF1C	-0.0761043697333518	3.22293490445298	-1.33787241038932	0.233599023963229	0.638332138819823	-5.55937489208295
Q8NBX0	SCCPDH	0.0681292023825329	3.29334258221513	1.51754164536147	0.18434308199139	0.592465458820377	-5.56014766467402
Q96BP2	CHCHD1	0.0919935438413038	3.35439298348908	0.985680603041073	0.365648851387743	0.743014383019471	-5.56110554836307
Q9NRF9	POLE3	0.0859135757724324	3.34212932386468	1.53714228994173	0.179605743843291	0.586561004680704	-5.56139647864228
P43234	CTSO	0.0704400824785778	3.43921017757474	1.46792299170031	0.196872071784175	0.606339456466303	-5.5615198595475
Q9H213	MAGEH1	-0.109036154633965	3.36495819178685	-1.0757080778354	0.326970397430341	0.716393419663218	-5.56181506216605
P10124	SRGN	-0.0645595136354771	3.43360959564851	-1.33442895355344	0.234652246708538	0.638332138819823	-5.56301386909682
Q53HL2	CDCA8	-0.0624453540107685	3.29764552515908	-1.53411366098594	0.180330072295398	0.587295904055071	-5.56339476385507
O95747	OXSR1	0.0620922037967678	3.36271634858059	1.83240509440025	0.121062104282666	0.510321594490244	-5.5636317708405
[truncated: 4,723 more rows]
