# Supplementary material for: Thalidomide promotes degradation of SALL4, a transcription factor implicated in Duane Radial Ray syndrome
Source: eLife journal article supplement (doi:10.7554/elife.38430), 2018-08-01
Supplement: supp [file elife-38430-supp-v1.zip › elife_poa_e38430_Figure_1_source_data_10.csv]

	ID	logFC	AveExpr	t	P.Value	adj.P.Val	B
Q96JP5-1	ZFP91	-1.94514728193553	3.01658136771088	-18.1646095378249	1.41070759590792e-06	0.00235193170389768	6.07946589258987
O15060	ZBTB39	-1.448316934255	2.92598805997723	-18.7422962202481	1.16711053739237e-06	0.00235193170389768	5.47254394790804
P51157-1	RAB28	-1.45561888336177	3.12544443342225	-33.4310434583826	3.42939148294272e-08	0.000285874074018105	5.4454930816236
Q9H116	GZF1	-0.586570283794888	3.20876110792402	-16.3139771241473	2.69978509556955e-06	0.0037509014261113	5.0579053920075
Q9UJQ4	SALL4	-1.20399052118575	3.34501265701467	-21.2929658328086	5.38071147568808e-07	0.00149512036204453	3.71558252340044
Q9NS37	CREBZF	0.664524777612393	3.28545802176869	10.8714385431271	3.03952949642438e-05	0.0253375178821937	3.01895765414045
Q96CK0	ZNF653	-0.777041686474832	3.24271497282132	-12.9023746885772	1.10220085330346e-05	0.0102088292368196	2.90177963480478
Q8N5C7-1	DTWD1	-1.42805600074191	2.92888651394122	-15.196863697448	4.13783864345869e-06	0.00492757470455309	2.27509250449222
Q9NQR7	CCDC177	0.427834140636758	3.26299550610375	8.77677371935052	0.000105658150441496	0.073397195173359	1.95242949332406
Q7LFX5-1	CHST15	-1.0969165808481	3.24180004951019	-9.00449781026709	9.11639232756208e-05	0.0690856785841432	1.8780910455852
P50914	RPL14	-0.329904369079464	3.21042530284041	-8.41668233046621	0.000134352002468046	0.0861506378902795	1.77132109922852
Q17R98	ZNF827	-1.0907420583947	3.26616273974842	-14.1292216284786	6.40605669132743e-06	0.00667511107236318	1.58398546246314
Q8NCN5	PDPR	0.205949049995208	3.35051521226733	8.24042039883566	0.000151610381471349	0.0902731528532262	1.4724275827426
Q96KG9	SCYL1	0.143964053380764	3.31614573356585	7.11099450914432	0.00034793655149127	0.193359939548749	0.643011949771239
P42766	RPL35	-0.356647864143205	3.22616294835373	-6.63391069519759	0.00051070181468215	0.224063701431074	0.358213727187684
Q9BVG3	TRIM62	0.471044631687174	3.36864382337186	6.67314857507467	0.000494431316813759	0.224063701431074	0.218382162853711
Q1ED39	C16orf88; KNOP1	-0.292752640496935	3.21063410437599	-6.72698016620199	0.000473064651517789	0.224063701431074	0.168025618148627
Q96A37-1	RNF166	-2.66658374310675	3.11142606029956	-23.0773534055347	3.2977102303903e-07	0.00137448562402668	0.0528542973551795
P29084	GTF2E2	-0.133324639079167	3.27566768668505	-6.33583106113461	0.000656398825494419	0.263331848980284	0.0238050070766676
P83731	RPL24	-0.333798585669899	3.20165672051548	-6.32349167100017	0.000663383976557816	0.263331848980284	-0.100292782849777
Q12931	TRAP1	0.107889969250732	3.35140273364391	6.75874946263002	0.000460951196112581	0.224063701431074	-0.225721928307864
P16402	HIST1H1D	-0.409487547162236	3.16693869234955	-5.70311552472628	0.00115386320115919	0.385092134446389	-0.345111808637061
O15145	ARPC3	-0.169820459610387	3.30768938116857	-5.76376451890184	0.00109099321184587	0.385092134446389	-0.52534807222807
Q12849	GRSF1	0.140404537584514	3.36606916828771	6.08437615109941	0.000817021128306045	0.309576732979963	-0.545984162537371
A6NHQ2	FBLL1	-0.129830070551278	3.26193162145883	-5.70214070351843	0.00115490683315256	0.385092134446389	-0.602455430388586
Q9C0F0	ASXL3	0.188137240987598	3.31686964229654	5.39646973893786	0.00154208230873313	0.45909993305712	-0.6579142132518
Q9BVN2	RUSC1	0.764696866930041	3.2879540335458	5.59898825035559	0.00127165774363924	0.407713036576028	-0.859492538463394
Q9BTX7	TTPAL	0.420551352609001	3.26684060023588	5.04703604255421	0.00217704600811611	0.50501342778451	-0.899310919207514
Q10713	PMPCA	0.129871232995531	3.37147414638477	5.44730972523575	0.0014685219586903	0.453392557320085	-1.04047674575672
Q8N442	GUF1	0.1255892588311	3.36698030771423	5.21961011841058	0.00183253225854227	0.50501342778451	-1.09563642425843
P26373-1	RPL13	-0.343803760051344	3.17484967675553	-5.32709881372707	0.00164929440757492	0.474086833846363	-1.14422984668524
Q8N5K1	CISD2	-0.169125597455693	3.34799195903513	-5.15332864188291	0.00195698077082774	0.50501342778451	-1.14872816501658
Q3KQZ1-1	SLC25A35	-0.417690198498996	3.36637227298939	-4.72893038681121	0.00302215778443756	0.50501342778451	-1.21710460898775
Q9UI09	NDUFA12	0.147157395516671	3.36397075778153	4.95567820113048	0.00238872705075166	0.50501342778451	-1.26171164766699
Q9Y2Z2-6	MTO1	0.130951513353	3.37698195913468	5.003410470851	0.00227536334442923	0.50501342778451	-1.26309512796002
Q9UBP4	DKK3	0.363634169274367	3.31719757320912	4.7943360149887	0.0028218623390822	0.50501342778451	-1.26413883847615
Q4G0I0	C16orf91	0.333245161087989	3.29987279977137	4.52629934252395	0.00375183402475285	0.50501342778451	-1.42034263843612
Q9BWE0-4	REPIN1	-0.250910114823817	3.16476668696538	-4.57050000699237	0.00357716061921622	0.50501342778451	-1.52963441999882
P49798-3	RGS4	-0.38938055210345	3.35351129759585	-4.40559133842504	0.00427969347789598	0.50501342778451	-1.53461398141138
Q9BXS6	NUSAP1	-0.211258167678644	3.24131960962639	-4.94815996648677	0.00240715793977174	0.50501342778451	-1.57623113340958
O43353-1	RIPK2	0.365234098513275	3.30434119150654	4.39895167614957	0.00431105988656597	0.50501342778451	-1.57659964743643
Q8WTT2	NOC3L	-0.230008546256931	3.210848733703	-4.84517102771806	0.00267649786216733	0.50501342778451	-1.66934068054878
P16219	ACADS	0.114056005542693	3.35742615172902	4.53175259563928	0.00372977402715955	0.50501342778451	-1.69875002690214
P30038	ALDH4A1	0.130761679172542	3.37693715542479	4.7887910635058	0.00283824967729853	0.50501342778451	-1.75150385827546
O94925-1	GLS	0.112520967910006	3.37430639557111	4.8058624942089	0.00278813755378907	0.50501342778451	-1.75229865315125
Q8IXZ2-1	ZC3H3	-0.318378918335417	3.20740315216443	-4.0900077759244	0.00609939708789279	0.514432074728773	-1.84870935061275
Q9H9L3	ISG20L2	-0.177774340908301	3.25710581743862	-4.43467337402802	0.00414528903376637	0.50501342778451	-1.85145377720334
P79522-2	PRR3	-0.174762034755474	3.24864593384444	-4.30577789060557	0.00477952595186736	0.50501342778451	-1.86625418499305
P17026	ZNF22	-0.237975997954936	3.22076327839526	-4.20514237670358	0.00535058068729569	0.50501342778451	-1.88808033840479
Q9NR48-2	ASH1L	-0.370286572017945	3.08107523266755	-4.37518717338112	0.00442545591603079	0.50501342778451	-1.89457518176585
O15460-2	P4HA2	-0.142239083100192	3.34251284865821	-4.29660905891417	0.00482862593206632	0.50501342778451	-1.90168753887275
P78345	RPP38	-0.15902764064436	3.27006054964413	-4.2265590079723	0.00522293579464679	0.50501342778451	-1.90334196133004
Q8N2W9	PIAS4	0.10690397703484	3.33077634924037	4.35844120780861	0.00450810964163176	0.50501342778451	-1.91180644239613
Q8NI77	KIF18A	0.132818424087983	3.33640381869187	4.664750897511	0.00323439374983342	0.50501342778451	-1.92286620138479
Q96CX3-1	ZNF501	-0.270336631127973	3.27531004586433	-4.02920131711412	0.00654155750829672	0.514432074728773	-1.92305931664318
P62249	RPS16	-0.103510819712138	3.2808177426023	-4.92126015376697	0.00247442996991419	0.50501342778451	-1.92491148868067
Q9Y2J4-4	AMOTL2	0.256456984836983	3.34616736346246	4.00767153082775	0.00670658322578015	0.514432074728773	-1.93173677802392
Q8IV50	LYSMD2	-0.347572548589731	3.37832286216743	-4.00832178668656	0.00670153164881611	0.514432074728773	-1.93332872020987
Q8N465	D2HGDH	0.151637508873858	3.36013535525324	4.19501891102525	0.00541212786878472	0.50501342778451	-1.9734560412093
O75616-1	ERAL1	0.10968945777256	3.38100104569738	4.35999130111142	0.00450038658939218	0.50501342778451	-2.00117967508888
P07305	H1F0	-0.297613300015686	3.18972146357981	-4.27347397212102	0.00495504501741247	0.50501342778451	-2.00534063030621
O43924	PDE6D	-0.209960856651051	3.29283604124939	-3.94343921352169	0.0072271081061774	0.518582244925558	-2.01498357676807
Q9HAV7	GRPEL1	0.103509461715821	3.37300992532401	4.5341547272515	0.00372010295762334	0.50501342778451	-2.03363942474833
P42765	ACAA2	0.0952825369363697	3.36748690327949	4.84821680709175	0.00266806022272117	0.50501342778451	-2.05143173326122
Q13823	GNL2	-0.210889057902195	3.25199121494248	-4.64992289071426	0.00328578255501218	0.50501342778451	-2.05584313107594
Q9Y3A2	UTP11L; UTP11	-0.313468841763078	3.22521518996228	-4.32641825310053	0.00467102688186467	0.50501342778451	-2.06651811079577
Q9BYN8	MRPS26	0.142728931017297	3.34562671339068	4.32927307821899	0.00465623834204699	0.50501342778451	-2.0740394576701
P46779	RPL28	-0.313163778740201	3.18878549801889	-4.76117426850384	0.00292148130148388	0.50501342778451	-2.08354031622001
P50213-1	IDH3A	0.118237188397282	3.37684294936944	4.38558486543831	0.00437499071609603	0.50501342778451	-2.09744413993379
Q969I6	SLC38A4	0.269002497219317	3.28943389517455	3.84102302012476	0.00815253293407924	0.526149044708998	-2.1119860990832
Q9NX05-1	FAM120C	0.123299890206874	3.30736348875419	4.20115570815917	0.00537472442237075	0.50501342778451	-2.14537520719892
O00330-1	PDHX	0.110050153425053	3.36682843989027	4.32616238246157	0.00467235490678321	0.50501342778451	-2.14550231829625
P01024	C3	-0.238103286635051	3.15601898852637	-3.8766977051834	0.00781602465958463	0.526149044708998	-2.15685329897556
P22087	FBL	-0.129424994751179	3.27035235237623	-4.88498339849548	0.0025685388212978	0.50501342778451	-2.15962532414764
P17096-3	HMGA1	-0.137181543637476	3.27866862412195	-4.2338790319926	0.0051800912355796	0.50501342778451	-2.16380791632348
P11498	PC	0.108676787849089	3.37219361029662	4.61069387419011	0.00342622379291649	0.50501342778451	-2.1734488141638
O96028-1	WHSC1; NSD2	-0.291180477226596	3.17413238352694	-4.85191038474074	0.00265786822874807	0.50501342778451	-2.17531667545788
Q9BRU9	UTP23	-0.211957582216842	3.21018164137381	-4.10364880632556	0.00600484503580856	0.514432074728773	-2.18060733132822
Q96GQ7	DDX27	-0.101393567871392	3.2836901280986	-4.6838790363089	0.00316943289915803	0.50501342778451	-2.18889432554568
P26440	IVD	0.120788071626082	3.37733211505879	4.34286128730397	0.00458656373985872	0.50501342778451	-2.20761267381451
P82933	MRPS9	0.110161080996238	3.36340805471195	4.4080399826151	0.00426819048906313	0.50501342778451	-2.22481996508477
Q96EY7-1	PTCD3	0.122817711355579	3.3508206419254	4.44741861033882	0.00408788337499768	0.50501342778451	-2.23020837567381
Q8WVM0	TFB1M	0.124348861566144	3.36072530230937	3.91966609489591	0.00743102836326555	0.518582244925558	-2.25202597395438
Q8N6N3	C1orf52	0.220632012399461	3.33926765865369	3.7975995422353	0.00858400552788193	0.526149044708998	-2.25383675568465
Q9H9P8-1	L2HGDH	0.145636289135951	3.37653948485893	4.06174974018237	0.00630059370249752	0.514432074728773	-2.25817883670746
Q9BVW5	TIPIN	0.149917647798764	3.35465555413332	3.93127540996661	0.00733065829925298	0.518582244925558	-2.27868827970096
O75127	PTCD1	0.142347260890116	3.36255627317384	4.18331738555372	0.00548425669759599	0.50501342778451	-2.28091260595232
Q9BRJ2	MRPL45	0.0952039971226785	3.37482424672545	4.27649017575893	0.0049383552566648	0.50501342778451	-2.28151730520743
O60832-1	DKC1	-0.12359812433582	3.24600068655209	-4.56543307690063	0.00359671305048296	0.50501342778451	-2.30190547947232
Q9UHN1	POLG2	0.121986621083304	3.34126134512609	4.03260941134295	0.00651585144996725	0.514432074728773	-2.32597398562372
Q02252	ALDH6A1	0.122808402240036	3.38285405318606	4.21828096700434	0.00527186565780714	0.50501342778451	-2.35687267233547
Q96QD9-1	FYTTD1	-0.303644282879909	3.29023485077528	-3.86162683786746	0.00795626556913457	0.526149044708998	-2.36172286884602
Q9P0M6	H2AFY2	-0.147524855751922	3.26464519837683	-4.57663895140928	0.00355363132055403	0.50501342778451	-2.36245190594083
Q9HC36	RNMTL1; MRM3	0.138923112607279	3.36652332038098	3.92714680647514	0.00736617907388621	0.518582244925558	-2.385912587168
Q92552-2	MRPS27	0.106392482721621	3.3499605355155	4.21795700205946	0.00527379094173597	0.50501342778451	-2.39329129457939
Q14684	RRP1B	-0.19422960958229	3.21177592147466	-4.3646617713603	0.00447720630789446	0.50501342778451	-2.41272477497643
O15162	PLSCR1	0.228175650240091	3.31403728595829	3.58812835981114	0.0110535342450104	0.548841879937909	-2.42682303082686
P09001	MRPL3	0.108966897220358	3.37535125918802	4.19545192799926	0.00540947913865509	0.50501342778451	-2.45739192537855
P08559-4	PDHA1	0.111717184069326	3.37229325739713	4.18764794289877	0.00545743847845982	0.50501342778451	-2.45840472613501
P40939	HADHA	0.130579799117441	3.37590715657243	4.46860985119913	0.00399439962890543	0.50501342778451	-2.49745696191985
Q8NC60	NOA1	0.104559227222987	3.35183481835483	4.07069824495846	0.00623609107611871	0.514432074728773	-2.50164440383125
P23434	GCSH	0.121941897704298	3.35566769430802	3.85681498691451	0.00800162842145619	0.526149044708998	-2.50561691971767
Q7Z7K6-3	CENPV	-0.143732165915521	3.26595151167361	-4.09757924340173	0.00604671251270138	0.514432074728773	-2.52071295739655
Q96I99-1	SUCLG2	0.13808652570112	3.34949012376592	3.91575386335483	0.00746519546437944	0.518582244925558	-2.53074037231509
P49411	TUFM	0.0934940871410303	3.372896380571	4.57619495389532	0.00355532722303717	0.50501342778451	-2.5389783470853
Q9BYG3	MKI67IP; NIFK	-0.203303556268076	3.23844715550405	-3.99997844712214	0.0067666705653562	0.514432074728773	-2.54777856596759
Q9Y324	FCF1	-0.147429519374912	3.21275030742102	-3.69874835404018	0.00966375246496883	0.541360519158275	-2.54791186753439
Q8NE62	CHDH	0.143808051072529	3.37165439564336	3.67522559944937	0.00994228917793237	0.541360519158275	-2.54997603164808
Q9Y2R4	DDX52	-0.149265196976824	3.25604066496719	-3.86762395760089	0.00790012789937625	0.526149044708998	-2.55181272870297
Q96CS4	ZNF689	-0.363424687082587	3.18947851767878	-3.69378121878669	0.00972184285034501	0.541360519158275	-2.56335353749877
Q9HBE1-1	PATZ1	-0.0943871041461275	3.34894917679837	-4.04587582526087	0.00641685363936035	0.514432074728773	-2.56360289515387
P49590	HARS2	0.147478444782277	3.35717557837269	3.88170987571825	0.00776999411602384	0.526149044708998	-2.5701353923358
P49207	RPL34	-0.266982908932388	3.19675023300384	-3.87724723400032	0.00781096317341208	0.526149044708998	-2.5720558978825
Q8N183	NDUFAF2	0.172994964424327	3.36554474736665	3.97780486355805	0.00694323794336185	0.514432074728773	-2.57213189826713
Q8N4H5	TOMM5	0.197636885535249	3.3425454289255	3.67340236175065	0.00996424614065262	0.541360519158275	-2.58549589363435
Q499Z4	ZNF672	-0.227668961639538	3.21902373028205	-3.43901230690981	0.0132878032261862	0.56589333863584	-2.58842286413261
O00411	POLRMT	0.125095263878628	3.3388141948033	4.16829982501317	0.005578403931775	0.505451904079091	-2.59731546233964
O95785-3	WIZ	-0.129768913637793	3.29059100873768	-4.25423259896098	0.00506301156789725	0.50501342778451	-2.6381200697156
Q4G176	ACSF3	0.147854263153504	3.35261008305336	3.80961068461619	0.00846217830467205	0.526149044708998	-2.65608032047111
O43159	RRP8	-0.0991919171683486	3.29112579070554	-3.98751183297111	0.00686531841877988	0.514432074728773	-2.66337037619248
P31040	SDHA	0.149934598395623	3.35729760732568	4.15671151680019	0.00565228690702048	0.506639394160459	-2.68036397709916
Q16836-2	HADH	0.123987577674144	3.38925700736002	3.93487541911816	0.00729984067713979	0.518582244925558	-2.68361154915853
P82650	MRPS22	0.152622597885995	3.37772122296331	3.80233413980192	0.00853575259632917	0.526149044708998	-2.68702779216623
Q02543	RPL18A	-0.352023553005218	3.19460048465112	-4.31344979257082	0.00473887139739057	0.50501342778451	-2.69451214083101
Q9BSC4-1	NOL10	-0.0676877699235603	3.30253434388507	-3.97407155884825	0.00697346742374656	0.514432074728773	-2.69870227595887
P54886	ALDH18A1	0.0874550023837415	3.35643670577401	4.38102583802496	0.00439703812762428	0.50501342778451	-2.70920626332528
P02771	AFP	-0.217975322412565	3.16650496884545	-3.49010079716071	0.0124708152078535	0.548841879937909	-2.70999460279212
Q92597	NDRG1	-0.186541858569517	3.33952681003328	-3.57059412972928	0.0112934312464215	0.548841879937909	-2.71127998400492
O75439	PMPCB	0.121468823053638	3.37973391781631	4.05974493810444	0.00631514646660729	0.514432074728773	-2.71703411651617
P48047	ATP5O	0.0905543548618215	3.36417931603401	3.94344675491563	0.00722704441300145	0.518582244925558	-2.72461999526911
A3KMH1	VWA8	0.105804723236669	3.35581120363259	4.03815039420596	0.00647429759651741	0.514432074728773	-2.77334234916166
Q16206	ENOX2	0.184391562079953	3.3359307974574	3.29586737042127	0.0159068059987048	0.599165044271862	-2.79142388486846
O75438	NDUFB1	0.247203045194534	3.35612163637467	3.31797462258374	0.0154678258341878	0.598288845331489	-2.80399027947848
Q15050	RRS1	-0.18018823959324	3.23352753394437	-3.64472528615627	0.0103167421999844	0.548841879937909	-2.8061266271407
Q9NYY8	FASTKD2	0.151842509455331	3.36311390292616	3.81358162055294	0.00842232425491284	0.526149044708998	-2.81569793686539
Q96D53-1	ADCK4; COQ8B	0.117958864238145	3.36404902010212	3.67034861721525	0.0100011420285958	0.541360519158275	-2.82836272902976
Q16134	ETFDH	0.13590605582345	3.36388199403122	3.80714866048113	0.00848699323209963	0.526149044708998	-2.83285766584066
Q07020	RPL18	-0.276766358678411	3.1462105501679	-3.74058320194799	0.00918945036924536	0.53568712082538	-2.84869729054064
Q9BUB7	TMEM70	0.119710543858343	3.36387285327863	3.4271991512005	0.0134849712612877	0.56589333863584	-2.85304321150045
Q13601	KRR1	-0.156998553809026	3.25280566406139	-3.63227687462148	0.0104740248152391	0.548841879937909	-2.85477836723752
Q8IYQ7	THNSL1	0.107656983713986	3.3759896250276	3.76876683292549	0.00888446176330899	0.527532546453985	-2.85661888128714
Q6DKI1	RPL7L1	-0.12514113555106	3.27442175285156	-3.55795648444554	0.011469892277455	0.548841879937909	-2.88896991636477
Q4G0N4	NADK2; NADKD1	0.106803536219079	3.38197574171386	3.50020048244617	0.0123159320744707	0.548841879937909	-2.88947118126585
Q9NP81-1	SARS2	0.134026252437727	3.34840572228466	3.76514734230427	0.00892299532749663	0.527532546453985	-2.89411284407922
P51553-1	IDH3G	0.107686664093346	3.37480744660437	3.54258157093287	0.011688681601415	0.548841879937909	-2.90007236521104
O95822	MLYCD	0.142313834839972	3.32778116858564	3.64089370554311	0.0103648737257163	0.548841879937909	-2.90390519324716
Q96M89-1	CCDC138	0.0816395065495971	3.3334676639731	3.68079774359844	0.00987551544979757	0.541360519158275	-2.91542860485024
P05166-2	PCCB	0.109667711353808	3.39282349810752	3.7863490319373	0.00869988299659833	0.527532546453985	-2.92053387589428
Q7L592	NDUFAF7	0.097290575956303	3.37152549617082	3.71904589223565	0.00943033074231406	0.538427401806113	-2.92137954779778
Q9UFN0	NIPSNAP3A	0.0901555949696028	3.35038828223603	3.51668860660659	0.0120676060012088	0.548841879937909	-2.92334533437133
P42696	RBM34	-0.318298193293973	3.17491455783637	-3.52894116090389	0.0118866397931537	0.548841879937909	-2.93111253441442
Q9UIF9-1	BAZ2A	-0.0668984190676833	3.3002221484702	-4.00142769110088	0.00675530548647675	0.514432074728773	-2.93226388303139
Q96SL8	FIZ1	-0.173417886772963	3.24485387746642	-3.14675578105955	0.0192477321415049	0.627167033091768	-2.93258628156883
O95139	NDUFB6	0.164964085235826	3.3527046872508	3.46327211841643	0.0128927437886189	0.559307335279778	-2.93331392778677
Q96CM3	RPUSD4	0.141550751891132	3.37952886007641	3.52344706628095	0.011967413733856	0.548841879937909	-2.93399716175259
P00505	GOT2	0.0925047760435642	3.34818858723743	4.17870495931899	0.0055129824770142	0.50501342778451	-2.94633929124051
Q5JTZ9	AARS2	0.101241133460327	3.35376829939488	3.76799343750127	0.00889267992237536	0.527532546453985	-2.96116397241648
P54098	POLG	0.125401105568879	3.35063537232262	3.74947812912322	0.00909196014753527	0.533736477393338	-2.96137391175568
Q8WWQ0	PHIP	-0.070306634515005	3.29263725245529	-4.19231155186353	0.00542872145578806	0.50501342778451	-2.96565156661368
O60936-3	NOL3	0.249396663989676	3.37815840479808	3.1632200120976	0.0188437805735468	0.627167033091768	-2.97472131987221
Q86VK4-5	ZNF410	0.188196594239113	3.32482096582494	3.14823454058045	0.0192110685462194	0.627167033091768	-2.98278107372934
P13196	ALAS1	0.292363458695122	3.37688648795762	3.26419722359635	0.0165595736765237	0.601006945527241	-2.98810191284777
Q8TE59	ADAMTS19	-0.414370383389835	3.38727052669236	-3.07251114864926	0.0211899089969192	0.629933028972188	-2.99071632045044
Q9NQ55-3	PPAN-P2RY11; PPAN	-0.130014494205941	3.26389973618701	-3.52033990421045	0.0120133623939887	0.548841879937909	-2.99150991503611
Q96SW2-1	CRBN	0.0841907568241997	3.32713211526451	3.59259155275111	0.0109933712049897	0.548841879937909	-3.00078390764847
P62829	RPL23	-0.132625464980297	3.26972554255751	-3.97676938292105	0.00695160784552569	0.514432074728773	-3.00179251816079
O95363	FARS2	0.119048211307591	3.33924636476364	3.4100966109923	0.0137761341049806	0.571332606463274	-3.00764560903901
P16403	HIST1H1C	-0.330447203492727	3.16205580144544	-3.50650230167744	0.0122203634091713	0.548841879937909	-3.01160739025305
P43357	MAGEA3; MAGEA6	-0.278196456946376	3.32408507576068	-3.00187841453755	0.023236069955892	0.643498962079186	-3.01552819850737
P38646	HSPA9	0.117716235662515	3.34562152748325	4.50462197947513	0.00384098595363791	0.50501342778451	-3.02443754244948
O75570	MTRF1	0.122018503153725	3.37094113714583	3.23195623289581	0.0172542678489723	0.601006945527241	-3.0564620464917
P61313-1	RPL15	-0.321660493921998	3.17257139539254	-3.71338295575606	0.00949482102513179	0.538427401806113	-3.06299511146012
P05165-1	PCCA	0.0852396295470374	3.35659212963654	3.7755288859249	0.00881296490766311	0.527532546453985	-3.07281518051663
Q7L3S4	ZNF771	-0.12895600372883	3.24153677686247	-3.23076123773759	0.0172806200606447	0.601006945527241	-3.07978035445717
P62917	RPL8	-0.371255697381188	3.17614749199975	-3.82321203335525	0.0083265308221759	0.526149044708998	-3.08064021487805
Q9BYG0	B3GNT5	-0.469885109921713	3.36692186087291	-2.95867563185833	0.0245922204925957	0.649728401128981	-3.08933385409118
Q7Z6M4	MTERFD2; MTERF4	0.159714554920114	3.35398281578899	3.20519840343598	0.0178549744214591	0.607506395009319	-3.09361800285326
Q8N5Z0-1	AADAT	0.224142307897454	3.34679343467773	3.09935530531455	0.0204641834214205	0.627167033091768	-3.0977398618577
Q9Y697	NFS1	0.113029651568805	3.36860319214409	3.63269346049354	0.0104687187477809	0.548841879937909	-3.10085272567013
Q8NG08	HELB	-0.131419790394633	3.35115044778948	-3.25147812297601	0.0168299172942243	0.601006945527241	-3.10332683238498
Q9H582-1	ZNF644	-0.146440884179387	3.26938547505918	-3.82611967756594	0.00829784650047723	0.526149044708998	-3.1107773870293
Q9BQ95	ECSIT	0.121351977355436	3.34814492558088	3.41343971920987	0.0137186812726735	0.571332606463274	-3.12583798318485
Q6PML9	SLC30A9	0.147720250944869	3.34075731238774	3.39467518683029	0.0140445965889067	0.576727867808505	-3.12613652644371
Q9Y375	NDUFAF1	0.15395118131063	3.36788426582506	3.52081890003311	0.0120062663714359	0.548841879937909	-3.13142839900496
P13995	MTHFD2	0.16111490636915	3.36052276689571	3.56684883429768	0.011345413366243	0.548841879937909	-3.14966040146145
Q9UGK8	SERGEF	0.118397714281046	3.35053138393947	3.12018291570071	0.0199196938092253	0.627167033091768	-3.15461694757669
Q9Y3U8	RPL36	-0.207106470641997	3.23432033076594	-3.52425804294994	0.0119554528769991	0.548841879937909	-3.15726857720121
Q9NNW7-1	TXNRD2	0.112688467645959	3.38076334574914	3.33837241274666	0.0150745216788468	0.59331884384507	-3.16932042159114
Q5T2R2-1	PDSS1	0.164236127523794	3.3381825654968	3.15803879181867	0.0189698992231015	0.627167033091768	-3.17392753504466
P62753	RPS6	-0.264648005291325	3.22657924820433	-3.72015766513425	0.00941772670963748	0.538427401806113	-3.18100552042713
P10109	FDX1	0.155390997564908	3.34568751382304	3.13599406368264	0.0195168544471065	0.627167033091768	-3.18509977548775
Q5ST30-4	VARS2	0.1173602213316	3.3489794962927	3.50745055424193	0.0122060536613414	0.548841879937909	-3.19115164687269
Q9NQR1-2	SETD8; KMT5A	-0.136332268201522	3.28170953251023	-3.07331308448538	0.021167828937766	0.629933028972188	-3.19464551815276
O95299	NDUFA10	0.126754789043562	3.35137241383199	3.4597423290208	0.0129494140725764	0.559307335279778	-3.19579886523029
O15091	KIAA0391	0.12780432887822	3.34521173882468	3.52263013252198	0.0119794757665638	0.548841879937909	-3.20117327686375
Q9NX58	LYAR	-0.197353721203452	3.23074119368007	-3.60923525868052	0.0107721805380632	0.548841879937909	-3.20207288614675
Q9Y4F4-1	FAM179B; TOGARAM1	-0.190784520886512	3.3622688112213	-3.0625234367035	0.0214670064150279	0.632140999781525	-3.20410076288093
P14927	UQCRB	0.164843129585843	3.37078614384649	3.34112173947126	0.0150223521747004	0.59331884384507	-3.21062042040938
Q9BRR8	GPATCH1	0.0840709321381583	3.30968538262426	3.55738651046961	0.0114779221762546	0.548841879937909	-3.21345307569516
O75414	NME6	0.140724257774276	3.34915144306883	3.03946232965155	0.0221219213855299	0.632140999781525	-3.21622799792219
Q4G0A6	FAM188B; MINDY4	0.155701751128511	3.3283792890273	3.13581263937124	0.0195214262984311	0.627167033091768	-3.22644485907307
O00222	GRM8	-0.227403805785893	3.32110797065386	-2.87289105151428	0.02754476910146	0.659808032269456	-3.22883350042146
Q13011	ECH1	0.101378987448097	3.3693893141084	3.55153491501305	0.0115607196251757	0.548841879937909	-3.22919703771655
Q9Y3D9	MRPS23	0.111686295732266	3.40349097248641	3.20056584242721	0.0179612698769172	0.608638803634073	-3.23683202028015
Q15119-1	PDK2	0.154743804628715	3.34692788320242	3.30053632023088	0.0158129732092298	0.599165044271862	-3.24529841025813
Q6IN84-1	MRM1	0.158504339265952	3.38771467731012	3.01756776971693	0.0227637598163833	0.639221125046461	-3.24671135561827
P04035-3	HMGCR	0.131295192067761	3.34451347626016	3.43449612607076	0.0133628046228701	0.56589333863584	-3.25356177057736
P49593	PPM1F	0.0952463858436676	3.33648080034941	3.40508899250157	0.0138626866439662	0.572076019129219	-3.26640779026362
P54756	EPHA5	-0.668035894073273	3.31625476900338	-3.04177216370442	0.0220553592909966	0.632140999781525	-3.2705792081011
Q9NZM5	GLTSCR2; NOP53	-0.325952371396161	3.18898659776165	-3.23169666354923	0.0172599881833368	0.601006945527241	-3.28048383204203
Q6KF10	GDF6	-0.241930279701685	3.43147145039481	-2.853176877221	0.028275815666867	0.667265529494461	-3.28789801419995
Q99798	ACO2	0.109194357562689	3.36774619687429	3.83423685038752	0.00821834780115239	0.526149044708998	-3.29311534927397
Q8IXX5	TMEM183A	-0.258540126002603	3.26035197966786	-2.77579657127043	0.0313528334687857	0.684022815667235	-3.30410283834555
O14530	TXNDC9	0.132819716415532	3.38227816295524	3.29339941644634	0.015956650651194	0.599165044271862	-3.31012853349946
Q16698	DECR1	0.11764333292464	3.34637475904764	3.33387036892726	0.0151603783276152	0.59331884384507	-3.31177316614592
P31930	UQCRC1	0.142111131897187	3.37840625628911	3.5829740493318	0.0111234655089597	0.548841879937909	-3.31219106282256
Q8NI60-1	ADCK3; COQ8A	0.101909865180364	3.35046817307152	3.25597718243308	0.0167337434412568	0.601006945527241	-3.31750981163541
Q9P032	NDUFAF4	0.127476424172932	3.37025516361366	3.32592241818086	0.0153132595257078	0.596501548627572	-3.33955864964753
Q14CZ7	FASTKD3	0.129732836334151	3.34783011670905	3.10314501898159	0.0203639200453989	0.627167033091768	-3.34192575156455
P10412	HIST1H1E	-0.501445495949498	3.19503633039394	-3.51801797342852	0.012047825815776	0.548841879937909	-3.35868715402435
Q9H6E5	TUT1	0.0699309593555345	3.31419138230134	3.29841726481482	0.0158554850867129	0.599165044271862	-3.36081054840621
Q92831	KAT2B	-0.164669425679155	3.29749427766595	-2.78116982436657	0.0311279853664379	0.681335594662755	-3.36537211105895
P25912-1	MAX	0.12459731129971	3.32198578926775	3.21170868476786	0.0177067507119869	0.60742170343672	-3.36677002788332
Q92522	H1FX	-0.276074167333545	3.16861152421177	-3.57560729576083	0.0112242622930441	0.548841879937909	-3.36865012296808
Q9NWT1	PAK1IP1	-0.071792680214239	3.29848699469154	-3.50563634698359	0.0122334473511176	0.548841879937909	-3.37196870497116
Q99575	POP1	-0.163443843698427	3.2332295309197	-3.61463150739005	0.0107015231746306	0.548841879937909	-3.37325463790861
Q8IXQ4	GPALPP1; KIAA1704	0.170298710051047	3.30708070438125	3.15663158563422	0.0190043110393111	0.627167033091768	-3.38167220089611
Q4G0S7	CCDC152	0.126151804311647	3.31145441049024	3.02953585156748	0.0224104560547566	0.635420277797452	-3.3860472718232
Q8N0U4-1	FAM185A	0.162640432145852	3.33583297166095	2.79236159043164	0.0306651752928151	0.681335594662755	-3.38727062667916
P39023	RPL3	-0.441481863083407	3.16099990194604	-4.08427831241395	0.0061396047171085	0.514432074728773	-3.39788914857719
Q9NRG4	SMYD2	0.118833421453097	3.31906981204576	3.22972698788172	0.0173034629230492	0.601006945527241	-3.40833967933693
Q07021	C1QBP	0.120799890353333	3.34537157622893	3.72344817407608	0.00938053168734018	0.538427401806113	-3.42303733680489
P83111-1	LACTB	0.151891821663052	3.32053877996186	3.02369787328323	0.0225820493492784	0.638115130086727	-3.45232814463797
Q9UGL1-1	KDM5B	-0.0898372161709386	3.3401191081038	-3.10671658248675	0.0202699160054604	0.627167033091768	-3.45304472085586
P34947	GRK5	-0.0700907149036387	3.30458289194147	-3.25876592044152	0.0166744313762211	0.601006945527241	-3.45953026356805
Q8N944	AMER3; FAM123C	0.110740186603585	3.33540285938819	2.87700225416955	0.0273948899605972	0.65810894153181	-3.46724652209193
Q15120-2	PDK3	0.0930454586080734	3.35067239893141	3.16939692312999	0.0186946158273522	0.625856696934972	-3.4693954462079
P52747	ZNF143	0.155321217367872	3.29380270961238	3.07889623301542	0.0210147951270673	0.629933028972188	-3.47162820958058
Q9Y4X4-1	KLF12	0.195635663042321	3.32331544725867	2.67248818966255	0.0360305403135961	0.703438396658071	-3.47689602550192
Q96GW9	MARS2	0.126832499211328	3.36712433134326	3.09081894090811	0.0206919951517853	0.6282260617606	-3.48099898586002
Q8N0Z8	PUSL1	0.145495873192046	3.34072360047047	2.87716993755461	0.0273887954789083	0.65810894153181	-3.48441171425707
Q86V81	ALYREF	-0.207164339499773	3.24864502300544	-3.60705036988163	0.0108009352630909	0.548841879937909	-3.49022361867315
Q4G0T1-3		-0.18882388036258	3.33681508473405	-2.73624402714842	0.0330623163077821	0.68901867185418	-3.49041105705075
Q96PE7	MCEE	0.120963428709136	3.38243195667971	2.91651886700042	0.0259981719565432	0.656363341212298	-3.50286102120687
Q16831	UPP1	0.115622776224385	3.3210235419358	2.78383629144226	0.0310170456905485	0.681335594662755	-3.50304738450274
Q5T160	RARS2	0.130964257088116	3.3433528283997	3.2394733612618	0.0170895006009164	0.601006945527241	-3.52265558953459
O95696-2	BRD1; LOC90834	-0.122251992022794	3.2922324475004	-3.50099259841801	0.012303874389892	0.548841879937909	-3.52516359752929
Q9UI36-1	DACH1	0.109565645623795	3.2901328552994	3.276290248108	0.0163069285909523	0.601006945527241	-3.52544868495079
Q9NXR8-1	ING3	0.138761780822731	3.31028975915119	2.96834883958578	0.0242813165410491	0.649728401128981	-3.52621789869491
Q13825	AUH	0.108854795781897	3.36191465711147	2.86813203794725	0.0277193659992893	0.660196099914503	-3.52940378073639
Q6NVY1	HIBCH	0.113695541999243	3.37788190394173	3.35084782738042	0.014839376155767	0.59331884384507	-3.53318177168428
Q86YA3-1	C4orf21; ZGRF1	0.103083351686694	3.3353549168735	3.24466750648973	0.0169766534994728	0.601006945527241	-3.53975394267163
Q8WW38-1	ZFPM2	0.113401381340637	3.2866423961414	3.11037522342303	0.0201741082145894	0.627167033091768	-3.54121222857661
Q7Z3T8	ZFYVE16	0.0878008759363827	3.3466018154451	3.43019887490238	0.0134346018439347	0.56589333863584	-3.54940924964636
P36956-4	SREBF1	0.174195496307286	3.34393540019291	2.6089190676174	0.0392736992989332	0.725910326731501	-3.54941935387935
P21953	BCKDHB	0.1582226097909	3.4032575716842	2.84252661295479	0.0286793942682808	0.671548962416821	-3.55840957703009
P09622	DLD	0.120897642531725	3.35224173570643	3.62436482420347	0.0105753665228498	0.548841879937909	-3.56090176986457
Q86YS3	RAB11FIP4	0.131784241813846	3.33805964832105	2.8889596149807	0.0269639292292285	0.657962775593099	-3.56237207746069
P00747	PLG	-0.188962080661692	3.17876341908068	-2.62353720432147	0.0385014344043269	0.722929597801969	-3.56443769990991
O76094	SRP72	-0.047248145566422	3.29586654251623	-3.67861336191514	0.00990163272101615	0.541360519158275	-3.56845552927836
Q96BW9-3	TAMM41	0.174675480402382	3.36038983476464	2.89269086482242	0.0268309460661439	0.657962775593099	-3.57150323722837
Q9NQ31-1	AKIP1	0.194576414670221	3.33953012179597	2.5733752782356	0.0412206824297489	0.736259435923381	-3.57375901274316
Q96RQ3	MCCC1	0.139542791745037	3.35141057629573	3.33416144164845	0.015154811248237	0.59331884384507	-3.5772656981353
O43493-1	TGOLN2	0.102047520619007	3.34500749846501	3.10881966475788	0.0202147829867539	0.627167033091768	-3.57912957868811
Q8WVF1-1	OSCP1	0.105790030659956	3.30850018937458	2.78086491307879	0.0311406983645045	0.681335594662755	-3.59367957728903
P30048	PRDX3	0.0911929308473825	3.3765437368361	3.545156837214	0.0116517165976296	0.548841879937909	-3.59547063845509
Q7Z6J0-1	SH3RF1	0.0913958936765864	3.32691864462234	3.12580371634126	0.0197754606772013	0.627167033091768	-3.59583187602107
P05452	CLEC3B	-0.295463281458456	3.16297239285038	-2.47398330779981	0.0472254305692825	0.77039371668403	-3.60599365768204
O95900	TRUB2	0.125003189141255	3.38420374792192	2.99837100759801	0.023343098561883	0.643498962079186	-3.60725238972043
Q86T82	USP37	0.10701161071818	3.32902321197774	3.13978010451535	0.0194217120783958	0.627167033091768	-3.61535890507538
Q96HY7	DHTKD1	0.106976735052005	3.37368673216409	3.31254208078169	0.0155744577059661	0.598288845331489	-3.62471970300797
Q9NSI2-1	FAM207A	-0.120347598385302	3.29633843914421	-2.8975922339494	0.0266573301806784	0.657962775593099	-3.62559096575791
Q15361	TTF1	-0.222080804176245	3.18265937596755	-3.22550991965657	0.0173969441889452	0.601746584062438	-3.63046187592261
Q9NVV4	MTPAP	0.101209073459499	3.35981056557123	3.10040088343733	0.0204364674585392	0.627167033091768	-3.63061011793258
Q92506	HSD17B8	0.105230725547972	3.35485767738422	2.77253678906358	0.0314900875384945	0.684022815667235	-3.63834824325431
Q8N8Q8-1	COX18	0.244743327698489	3.35162413695378	2.7051424218172	0.0344763508344996	0.703438396658071	-3.63999604472278
Q9UPN6	SCAF8	0.0590417234122656	3.33387867859634	3.45385501568489	0.0130445438602061	0.56051194648803	-3.64019206183883
Q5TEA3	C20orf194	-0.168264235822453	3.31409799599488	-2.63585545159048	0.0378631683401038	0.720610436719419	-3.64779048251062
P30042-1	C21orf33; LOC102724023	0.115912006658742	3.34692723608235	3.06139541707324	0.0214985479342183	0.632140999781525	-3.6488232041817
Q7L8L6	FASTKD5	0.110354302697064	3.36014703990401	3.33676154797082	0.0151051805401918	0.59331884384507	-3.65251478935289
Q07157-2	TJP1	0.0673439940133562	3.32488421499332	3.48960215960329	0.0124785173232971	0.548841879937909	-3.65526095627124
Q9BQ75	CMSS1	-0.122462509542492	3.27386923593524	-3.08775166390134	0.0207745228216864	0.6282260617606	-3.65577047465814
Q969E8	TSR2	0.11980078896956	3.31636027446858	2.7819464446191	0.0310956299604093	0.681335594662755	-3.65782006862126
Q8TDD1-2	DDX54	-0.159926854400618	3.226923264017	-3.31558417710021	0.0155146476686867	0.598288845331489	-3.65931954544038
Q96S90-1	LYSMD1	0.0912225796234563	3.33641778633583	2.81262696983734	0.0298457825392028	0.681331702203631	-3.66932817180783
Q15759	MAPK11	-0.177993475654459	3.31043923651914	-2.6955892154322	0.0349235176997134	0.703438396658071	-3.67163720510671
P78368	CSNK1G2	-0.13280269718632	3.30350100208177	-2.67244482805016	0.0360326529958009	0.703438396658071	-3.67305979902092
Q96I51	WBSCR16; RCC1L	0.120153349989031	3.38136892508969	2.99081739911082	0.0235754103521737	0.646462568078026	-3.67895111283146
Q12809	KCNH2	0.187153088101151	3.32652225525974	2.40676962867287	0.0518021028466451	0.77916608621583	-3.68213527245591
P36955	SERPINF1	-0.126445890865241	3.3305753947216	-2.79404025527197	0.0305963952809722	0.681335594662755	-3.6839140462477
O60683-2	PEX10	-0.179927722605884	3.3344833317657	-2.41315299777369	0.0513481483437546	0.77916608621583	-3.69664171257941
Q16740	CLPP	0.114528947390108	3.36550245699135	2.91236995256857	0.0261411503457873	0.656363341212298	-3.69678441784265
P07954-2	FH	0.0848119881614001	3.34787634786957	3.50529838085412	0.0122385579520824	0.548841879937909	-3.69825878713763
Q9UGC7-1	MTRF1L	0.134067352098655	3.33419121103258	2.55993086171541	0.0419835041843842	0.739903786217815	-3.70121198796539
Q9H7E9-2	C8orf33	-0.111103070291123	3.28536794138326	-2.69303437773439	0.0350441483237784	0.703438396658071	-3.72061662254889
Q9H6E4	CCDC134	0.118856938052601	3.32583898723132	2.96859162120356	0.0242735681262076	0.649728401128981	-3.72091908062095
P18065	IGFBP2	-0.16572835498476	3.29529290299244	-2.92734744810789	0.0256289529764949	0.653342360893155	-3.72139523849358
P42704	LRPPRC	0.106628016448739	3.3525107322782	3.99014513828119	0.00684434856774312	0.514432074728773	-3.72544527881458
Q9NZJ6	COQ3	0.128461927441997	3.36306181864024	3.03830290036167	0.0221554144007921	0.632140999781525	-3.726564095403
P14868	DARS	-0.0458609141593984	3.33323292033954	-3.48335664950739	0.0125754317500169	0.548841879937909	-3.7284581350641
Q9BZE1	MRPL37	0.120204149797327	3.36835765086302	3.0876139213962	0.0207782372659894	0.6282260617606	-3.72956896638754
Q9Y6M9	NDUFB9	0.127538905545672	3.38136297358418	2.75527491559308	0.0322276875669163	0.68901867185418	-3.73001022711363
Q9BST9	RTKN	-0.111505485106155	3.33758181101176	-2.7830296155359	0.0310505631545762	0.681335594662755	-3.73755668824605
Q9P0J0	NDUFA13	0.129735012759462	3.35194402891198	3.03617586627133	0.0222170018948914	0.632140999781525	-3.73908448225703
Q9BVV7	TIMM21	0.174218402827323	3.3477222035594	2.88975268737584	0.0269356046298964	0.657962775593099	-3.7409926911707
O75509	TNFRSF21	0.16360378203484	3.36451928993626	2.60655350849823	0.0394002048836883	0.726637406881472	-3.74263668915816
P15822-1	HIVEP1	0.128240005730635	3.32384194180684	2.91858881384832	0.0259271531960559	0.656363341212298	-3.75009758436304
Q9GZT6	CCDC90B	0.153979975903166	3.3612897523745	2.83621703601402	0.0289213996835263	0.671556511871519	-3.75042159171006
Q99766-1	ATP5S	0.137860985305633	3.39009652410948	2.56814545120232	0.0415156624949956	0.736259435923381	-3.7639308570837
Q96C36	PYCR2	0.0913650438218558	3.37163191863261	2.99683500250427	0.0233901374172257	0.643498962079186	-3.76866934927724
O95503	CBX6	-0.117790653598591	3.36715628126399	-2.54111738855731	0.0430760757707376	0.751279657916593	-3.77309488848959
Q9NS69	TOMM22	0.182370475697789	3.34262487341763	2.65483567799939	0.0369015939735731	0.710419601301861	-3.77516050456558
Q9BV79	MECR	0.140765866779209	3.36409568849238	2.94626225124839	0.0249975014536168	0.649728401128981	-3.77530578228965
Q9H3H1	TRIT1	0.0928470152505776	3.34561253854023	2.83104023561292	0.029121592892563	0.672175341316053	-3.78437879492491
Q96K58-2	ZNF668	-0.12172241813191	3.24633497091108	-2.90057660827338	0.026552210097113	0.657962775593099	-3.78652075579024
Q9NVH0	EXD2	0.119655487903253	3.362004426761	2.96446070259417	0.0244057713889123	0.649728401128981	-3.78859971161914
Q9BT88	SYT11	-0.130095816132213	3.35266144773161	-2.94526675931196	0.0250303135094255	0.649728401128981	-3.79700264334744
Q8NDV7	TNRC6A	0.0723368224809059	3.3289000328695	3.24311980621069	0.0170101933120866	0.601006945527241	-3.81214350426687
Q15375-1	EPHA7	0.137556526975027	3.34256812875388	3.00861214427982	0.0230320735833189	0.640904861726876	-3.81240088932401
P30084	ECHS1	0.091782219575267	3.35778918506983	3.37714478922988	0.014356759329978	0.583424928578554	-3.81513759608215
Q9UNH6-3	SNX7	0.0820249618418483	3.343593419886	2.85156845603074	0.0283363720538675	0.667265529494461	-3.81796581736964
O95258-3	SLC25A14	0.151060145094787	3.35309651791868	2.60440980034017	0.0395152190600184	0.7271364266008	-3.81936854315259
Q03188	CENPC; CENPC1	-0.0786683785070179	3.26966944662709	-3.01720532092246	0.0227745530396832	0.639221125046461	-3.82294434265851
Q9NWS8	RMND1	0.162035265906871	3.34382036519202	2.75443916536796	0.0322638644717277	0.68901867185418	-3.82335198139357
Q969Y2-2	GTPBP3	0.09161076546809	3.37123864247352	2.75343160965743	0.0323075359469411	0.68901867185418	-3.82444924311499
Q16798	ME3	0.147991775753249	3.34402004884258	2.59574431754899	0.0399837744944223	0.730931456547159	-3.82485804304397
Q9H0R6-1	QRSL1	0.102930076550529	3.39299367323413	3.1224946592346	0.0198602352284821	0.627167033091768	-3.82842830334896
Q9BYD6	MRPL1	0.11264978414186	3.36273777562686	3.03770056757413	0.0221728359502944	0.632140999781525	-3.83043432999068
P08574	CYC1	0.122750370401531	3.36683436687039	2.97081003022183	0.0242028907012864	0.649728401128981	-3.83757772219175
Q96EY8	MMAB	0.11348423672529	3.36210999509368	2.67494742204954	0.0359109358681776	0.703438396658071	-3.83984304965582
Q9GZY4	COA1	0.129314982017183	3.36193248384508	2.75965943463128	0.0320386045798646	0.68901867185418	-3.84167293198005
Q9H2D1	SLC25A32	0.166998562453475	3.35255941196851	2.5318568963976	0.0436248458772197	0.751279657916593	-3.84917491208125
Q9Y676	MRPS18B	0.14137635870924	3.36252962636814	2.67275806967096	0.0360173940697565	0.703438396658071	-3.85063922573068
Q13405	MRPL49	0.127829202337952	3.3748998217808	2.66335055720423	0.0364786711075603	0.707177214773541	-3.85080808080542
Q5JXC2	MIIP	0.126557544179698	3.36446040635202	2.47811369366475	0.0469583873906597	0.769518669884973	-3.85262467395279
Q5JPH6-2	EARS2	0.0778044699429783	3.37948083372722	2.88591168705652	0.0270730844563859	0.657962775593099	-3.85805355247857
Q53H82	LACTB2	0.0763738629030653	3.33231859535067	2.93300134003292	0.0254384215029078	0.650474483583556	-3.86310918513344
P35568	IRS1	-0.181348356300299	3.32045205876241	-2.34813504485796	0.0561731230068919	0.77916608621583	-3.86566631207943
Q5JTH9-1	RRP12	-0.159615315136508	3.23821719754086	-3.48603415997423	0.012533782634559	0.548841879937909	-3.86927454993358
Q7Z3D4	LYSMD3	-0.161860632612853	3.34049812978303	-2.27881542787347	0.061839763356838	0.788220592266975	-3.8760772166073
Q4G0J3-3	LARP7	-0.169267381740966	3.21439394339101	-3.26418436840859	0.0165598445079547	0.601006945527241	-3.87614750961533
O14786-1	NRP1	0.0701945818791365	3.31232872892009	3.08680035356617	0.0208001911043577	0.6282260617606	-3.877015630206
P51397	DAP	0.0899290234862628	3.30482175331261	2.7194232886234	0.0338192280369311	0.69799381564028	-3.88019694841878
Q99807-1	COQ7	0.111163654088541	3.39340352030412	2.74475390552077	0.0326862854838425	0.68901867185418	-3.88083806481483
Q96EH3	MALSU1	0.177718181640569	3.35431024628784	2.2088935810468	0.0681568083010342	0.797430500224524	-3.88536853603985
Q96EU6	RRP36	-0.113803175028408	3.27306949164444	-2.95980965172233	0.0245555510312846	0.649728401128981	-3.88812954049667
Q04656-3	ATP7A	0.0674370513452233	3.31707970567447	3.27863306542618	0.0162584713272292	0.601006945527241	-3.89938422635792
P13073	COX4I1	0.108490018111217	3.35298235158621	3.11409682519674	0.0200771558037976	0.627167033091768	-3.90681621755365
Q9HD23-4	MRS2	0.156135381612494	3.3499204759501	2.67263623249346	0.0360233283025731	0.703438396658071	-3.91000577886904
Q96EL2	MRPS24	0.133354144416687	3.35979645810413	2.55124130885011	0.042484460548806	0.745579922389151	-3.91132222096405
P05091	ALDH2	0.0972232663433562	3.36777566150871	3.18429209991046	0.0183401735957528	0.618962295927916	-3.91193823239754
O43173	ST8SIA3	0.127175698208629	3.34311670697004	2.5718118400322	0.0413086328918859	0.736259435923381	-3.91578124514425
Q9H845	ACAD9	0.111763433557629	3.3517246713451	3.22118966308226	0.017493284132787	0.602578580706248	-3.91625506548057
Q9H9P2	CHODL	-0.197104568351324	3.35406836032779	-2.28569632029077	0.0612516931507161	0.783561602826401	-3.92298613843634
P55084	HADHB	0.111067092431812	3.39963722265956	3.12646172255495	0.0197586501460458	0.627167033091768	-3.93225784943
Q9H5Q4	TFB2M	0.111319547080407	3.35508142061431	2.88989738273186	0.0269304402837551	0.657962775593099	-3.93314880935857
P21912	SDHB	0.150395787021286	3.36706645106662	2.93430978054729	0.0253945459392297	0.650474483583556	-3.93507030988405
O00233-1	PSMD9	0.102009659316992	3.32623632511588	2.92422354476801	0.0257348847804054	0.654042681492254	-3.94079318789246
O76031	CLPX	0.152515246886639	3.36301822783977	3.17575455581604	0.0185424273994054	0.623264817747757	-3.94371470002768
O75367-1	H2AFY	-0.205057481138838	3.25961968779543	-3.42576000682947	0.0135092099794304	0.56589333863584	-3.94481490265643
Q8TAA5	GRPEL2	0.117031046317044	3.35363472494477	2.52891676445707	0.0438006134533906	0.751279657916593	-3.94489949532607
Q9BRT2	MNF1; UQCC2	0.122665531323276	3.39883030747793	2.71923257180749	0.033827915249361	0.69799381564028	-3.94549975123841
Q9UIS9-9	MBD1	-0.090111019355017	3.30222862939505	-2.65044396038173	0.0371217577905246	0.713011458391274	-3.945781329011
Q9NX40	OCIAD1	0.285248078393567	3.31326835818723	2.74509130752112	0.0326714709032406	0.68901867185418	-3.94965774214583
Q8N567	ZCCHC9	-0.136334423638309	3.26412576231864	-2.36064551088602	0.0552092858782265	0.77916608621583	-3.95494917008517
P84098	RPL19	-0.317596635549246	3.17266753826613	-3.26981313934531	0.0164417194948627	0.601006945527241	-3.96156660371969
O60232	SSSCA1	0.0854401859553082	3.30541006825184	2.71480960046602	0.0340300516691981	0.698563363965373	-3.96685889830581
O94925-3	GLS	0.115704966282333	3.35580580654478	2.42951172395439	0.0502036807921522	0.77916608621583	-3.97419878553079
Q6P2Q9	PRPF8	-0.0616038675085188	3.27988987135887	-3.85255315136822	0.00804204588621464	0.526149044708998	-3.97827163972553
Q14028	CNGB1	-0.178554785017913	3.26425004841828	-2.171168465874	0.0718371878619277	0.798946025571133	-3.98270047215811
Q9BR77-1	CCDC77	0.0659890984388334	3.37837761814121	2.80246549376193	0.0302536727579006	0.681335594662755	-3.98452417308826
Q9Y2S7	POLDIP2	0.127069893090546	3.35601947520979	2.73951257752094	0.0329173438097951	0.68901867185418	-3.99170749942425
P62241	RPS8	-0.388796910325237	3.17745062250947	-3.30224421620608	0.0157788005615984	0.599165044271862	-4.00244856700577
Q9BW66-3	CINP	-0.176739824700315	3.39801749363365	-2.47647531251491	0.0470641239453022	0.769518669884973	-4.00576381741112
P50995	ANXA11	0.164892446790777	3.30748283467567	2.27141613604989	0.0624786579299676	0.789124382582136	-4.00845924931153
Q96EA4	SPDL1	0.0885722325171471	3.33337571538712	2.8379742782284	0.0288537809103347	0.671556511871519	-4.00985449292922
Q9Y6H3	XRCC6BP1; ATP23	0.112796896530616	3.3131880532482	2.51569627892037	0.0446002336683161	0.754616969175221	-4.01277438420736
P16260	SLC25A16	0.143069092107746	3.33912496143012	2.25161754097215	0.0642219333440039	0.794145183792996	-4.01290513670479
A0PJW6	TMEM223	0.150570215611846	3.3686859873916	2.21200518121004	0.0678620249869876	0.797430500224524	-4.01605570514172
Q9UBW7	ZMYM2	-0.0894943256038834	3.27613682703122	-3.36660771814133	0.0145480458513151	0.58585753727808	-4.01853724197412
O15347	HMGB3	-0.0555824486151569	3.30305503311083	-3.04375324422027	0.0219984435318632	0.632140999781525	-4.01870198248556
Q96E52-1	OMA1	0.136790471263613	3.35707468821136	2.48072367461765	0.0467904614555391	0.769518669884973	-4.01934553685145
Q5T440	IBA57	0.132436576898315	3.3881060396416	2.61268952379624	0.0390729510612354	0.723804711214353	-4.0249323954204
Q13615	MTMR3	0.0733625589188742	3.32690150191533	2.95911942750274	0.0245778629667181	0.649728401128981	-4.0282950438652
Q8TCT0	CERK	0.126597363943197	3.29683049708279	2.39965727630039	0.0523128416634562	0.77916608621583	-4.034173320759
P62424	RPL7A	-0.361776041762685	3.17003863467998	-3.25223006246899	0.0168138016154337	0.601006945527241	-4.034635585154
Q53R41	FASTKD1	0.131425160459654	3.35843213951158	2.7995378435736	0.0303722957337924	0.681335594662755	-4.03506611688701
Q70CQ3	USP30	0.107896026048391	3.34057520701697	2.57707714435521	0.0410132238509697	0.736259435923381	-4.03737431629738
Q5VU97-1	CACHD1	0.106672214095574	3.30924709618798	2.36478633888316	0.0548940713928422	0.77916608621583	-4.05041542482463
Q8TF47-1	ZFP90	0.159645940749858	3.2927950368001	2.16600956349749	0.0723560869090519	0.798946025571133	-4.05152188450868
P55197	MLLT10	0.109348376780971	3.28038606137481	2.50793267037457	0.0450769542602798	0.754616969175221	-4.05187122193124
Q1L5Z9	LONRF2	0.103058696392857	3.31639384044766	2.60118421544111	0.0396889484289064	0.7271364266008	-4.05712487848491
Q9Y619	SLC25A15	0.149380869870964	3.35522359985374	2.52308912465172	0.0441512117525083	0.7540026950644	-4.05997850599448
Q96RT1-8	ERBB2IP; ERBIN	0.0726948500828685	3.33325350733118	3.05896186903083	0.0215667655804749	0.632140999781525	-4.06123681348978
Q16626	MEA1	0.113758645500861	3.36829874824944	2.42071007017623	0.0508160962074591	0.77916608621583	-4.06584745467036
P03915	ND5	0.19596281537962	3.3331104279331	2.35380388489529	0.0557342301227154	0.77916608621583	-4.06935236344174
Q7Z3D6-2	C14orf159	0.101104546460425	3.36547096136041	2.69560734442532	0.0349226632922916	0.703438396658071	-4.07913341264859
Q969S9	GFM2	0.102524938956384	3.37614088618085	2.88718238188585	0.0270275195157124	0.657962775593099	-4.09699554076163
P62701	RPS4X	-0.240866443391356	3.25342285632007	-3.39042146513946	0.0141196527646325	0.576967771794001	-4.09943501665437
Q9P031	CCDC59	-0.190529944044519	3.24086681774337	-2.63622653768412	0.0378441156413431	0.720610436719419	-4.10380531555131
Q8N8R3-1	SLC25A29	0.13632804639774	3.34767717772955	2.41227749413201	0.0514101631378266	0.77916608621583	-4.10602718303634
P43897	TSFM	0.141176792904695	3.34969736193457	2.95559100472379	0.024692263611256	0.649728401128981	-4.10612044739808
Q96EB1-1	ELP4	0.0760984887322496	3.31366911274681	2.58223816705332	0.0407258319528757	0.73493215402778	-4.108185817877
P46199	MTIF2	0.145271821931181	3.34156374897205	2.98684353274398	0.0236986284597586	0.647710710952615	-4.11091103071783
Q9HA77	CARS2	0.146090826007409	3.34280051827462	2.84511622850807	0.0285806984789779	0.67112310569228	-4.11167117506433
Q7Z309-2	FAM122B	0.177902011555022	3.32636133360152	2.21749893210398	0.0673447608305426	0.797430500224524	-4.11350158771249
P49821	NDUFV1	0.100024040082548	3.39106629888817	2.86853152396403	0.0277046641945578	0.660196099914503	-4.11486398139325
P45880-2	VDAC2	0.07283443525861	3.35038649322775	3.37377397134091	0.0144176505862742	0.583424928578554	-4.11716319421838
Q96HJ9-1	C7orf55; FMC1; C7orf55-LUC7L2	0.19975666376202	3.32555021907839	2.26611765807778	0.0629403463347288	0.790166757599848	-4.11799217015235
Q6PK04	CCDC137	-0.213397318704727	3.21538134269736	-2.53953199928489	0.0431695059405362	0.751279657916593	-4.11999823119379
Q8IYB8	SUPV3L1	0.138192176442533	3.34732667011371	3.00751449161374	0.0230651941600363	0.640904861726876	-4.12385413463448
Q9C0D4	ZNF518B	-0.138625402980541	3.23989353269745	-2.40033260629786	0.0522641209301416	0.77916608621583	-4.12575786840881
Q9UNZ5	C19orf53	-0.167123932708266	3.21263866770761	-2.2685064375413	0.0627317626559982	0.789927452417524	-4.12745801263537
P46781	RPS9	-0.290829329919482	3.24586466339747	-2.94894947287097	0.0249091602149027	0.649728401128981	-4.13750994536742
Q9BTK6	PAGR1	0.172203430939276	3.30312028159955	2.06205524869223	0.0836679389606187	0.800328542096179	-4.13752904430732
Q5JRX3	PITRM1	0.098812128633125	3.36382196542141	3.08024078997717	0.0209781203714277	0.629933028972188	-4.14181563365321
Q9Y3A0-1	COQ4	0.114959449613174	3.32630857328107	2.25057576575366	0.0643150412199554	0.794145183792996	-4.14469128616641
Q86U42-1	PABPN1	-0.101381439555624	3.30533188086507	-2.87711830263968	0.0273906720035744	0.65810894153181	-4.1465621265656
P22830-2	FECH	0.0825229732251501	3.37975181435098	2.83873124258283	0.0288247051539754	0.671556511871519	-4.15037107397472
Q9Y6C9	MTCH2	0.133032514919108	3.34674256684228	2.94127563522444	0.0251623304935341	0.649728401128981	-4.15695788390887
Q8IY81	FTSJ3	-0.193487127497946	3.21968786758043	-3.11492659985348	0.0200556081659201	0.627167033091768	-4.16238810665131
O95863	SNAI1	0.112605517490637	3.44084950012483	2.28418633421499	0.0613802455189107	0.783561602826401	-4.17440493333344
Q9NXR5	ANKRD10	0.180497170895421	3.3168205697132	2.09014891795268	0.0804441615814775	0.800257563648142	-4.18066965801687
Q9NVH1-1	DNAJC11	0.11851624869399	3.35588054619104	2.76568668124131	0.0317806107517738	0.688112133056588	-4.18219561570803
P50443	SLC26A2	0.10213463877494	3.32029761761164	2.31737557518894	0.0586180267929604	0.780574874354821	-4.18338190792618
Q96DX4	RSPRY1	0.111656016047238	3.34489601528481	2.47193747963933	0.0473582901759312	0.77105216192688	-4.18419316490307
Q96SD1	DCLRE1C	0.144423910220186	3.31255525588623	2.20664932608319	0.0683702388636309	0.797430500224524	-4.18526347003147
Q9NV79	PCMTD2	-0.0935892001491653	3.33508875034348	-2.62243223709163	0.038559242902755	0.722929597801969	-4.18845873569405
Q8N490-2	PNKD	0.148510529851884	3.3568798533111	2.26625552702018	0.0629282884174096	0.790166757599848	-4.18895523174294
Q56VL3	OCIAD2	0.189174058943778	3.34902226312975	2.69327640810031	0.0350327014889241	0.703438396658071	-4.19068527036173
O15063	KIAA0355	0.0888589972703704	3.31266966777261	2.78220972052958	0.0310846695745146	0.681335594662755	-4.19323049713647
Q9P2F8-1	SIPA1L2	0.0672203340183933	3.32687796217328	2.59010930999823	0.0402916201740221	0.734708402418653	-4.19334044676362
Q96EY4	TMA16	-0.156439240342211	3.26059568464104	-2.56547219012245	0.0416673041265219	0.736259435923381	-4.19349089543266
O95182	NDUFA7	0.0756746616847869	3.32354647395612	2.67934863338012	0.0356979361578861	0.703438396658071	-4.19361514973817
Q9Y3R0	GRIP1	0.0968777676231882	3.30261338634968	2.85848683856937	0.0280768821616147	0.666497272191935	-4.19640766971936
Q9UKI2	CDC42EP3	0.0915899615307741	3.39169973781488	2.32630085523922	0.0578974268798016	0.77916608621583	-4.19668687279257
Q96AQ8-1	CCDC90A; MCUR1	0.195683741234002	3.35035646735416	2.62015226843373	0.0386788148536082	0.722929597801969	-4.20064201338649
Q9GZM8-2	NDEL1	0.118737842892092	3.33313665208742	2.69214308900612	0.0350863361922538	0.703438396658071	-4.21137532268304
O75746	SLC25A12	0.158783822318588	3.35340954014234	2.57103959556312	0.041352148277128	0.736259435923381	-4.21193148622934
Q9Y597	KCTD3	0.0756165479365118	3.31810827948989	2.5651012121491	0.0416883941645676	0.736259435923381	-4.21280937330878
Q9BZ95	WHSC1L1; NSD3	-0.0916859048990636	3.27537047962671	-3.05725990916674	0.0216146145527164	0.632140999781525	-4.21610301976162
Q0P6D6	CCDC15	0.0997827719552078	3.33339932005688	2.30340325965601	0.0597648493289433	0.780650065584285	-4.21748891153468
Q2KJY2-1	KIF26B	0.0701931671677556	3.29216337621659	2.74266100474529	0.0327783404921487	0.68901867185418	-4.21930317384996
Q70CQ1-1	USP49	-0.229725900786904	3.3051914737211	-1.92037990489982	0.102024830685561	0.809378699915685	-4.22145208292168
Q9UHJ3-1	SFMBT1	0.126755084580278	3.29602337185696	2.38507325908393	0.0533766340437097	0.77916608621583	-4.22269472956255
Q15118	PDK1	0.160114577685817	3.33682551823442	2.73232546717796	0.033237017629903	0.690932117114393	-4.22748918859228
Q9NXF8-1	ZDHHC7	0.162485304880877	3.27751009986151	2.14879191228391	0.0741158281985198	0.800257563648142	-4.22773056656463
Q32NC0	C18orf21	-0.16600919300206	3.21621708731282	-2.14144703783056	0.0748797744597488	0.800257563648142	-4.22875075305679
Q8N370-3	SLC43A2	0.118962854842514	3.32653792798173	2.08715695629372	0.0807814072593262	0.800257563648142	-4.23131334704989
Q8N3Z3-1	GTPBP8	0.119247848980603	3.35626958654823	2.20271931082215	0.0687456426933875	0.797430500224524	-4.23413554615422
Q9H992	MARCH7	0.123060821627058	3.35782910880622	2.17969159623312	0.0709882407766075	0.797430500224524	-4.23482823113581
Q9NP80-1	PNPLA8	0.0944572248709405	3.33969585671417	2.40500957478294	0.0519280055588217	0.77916608621583	-4.23565178766723
P32456	GBP2	0.0975880077862256	3.30398428418084	2.36709897831833	0.0547188413603531	0.77916608621583	-4.23688184255478
O00584	RNASET2	-0.139106193472339	3.34994786229374	-2.29906723278859	0.0601254524701462	0.780650065584285	-4.23932267887443
Q9UQ90	SPG7	0.161975030058825	3.35592570482514	2.82928116705439	0.0291899560408363	0.672175341316053	-4.24180630509217
Q8WUP2	FBLIM1	0.0925835383232002	3.32819196400043	2.49326365649387	0.0459923925564103	0.763730247709633	-4.24506746487544
Q5HYK9	ZNF667	-0.206930280961468	3.17094787495765	-2.00136040641831	0.0910863834228569	0.808487494800536	-4.24698961731107
Q9Y3C1	NOP16	-0.135346331435751	3.25248373348273	-2.68422651667178	0.0354634364787012	0.703438396658071	-4.24719135654989
Q99714-1	HSD17B10	0.0920283038579964	3.36248427300265	2.94088124463652	0.0251754166944171	0.649728401128981	-4.24757655948132
Q9NXG0-2	CNTLN	0.0812849839462328	3.34486350793685	2.36756781047178	0.0546833887645576	0.77916608621583	-4.25214288252337
P62280	RPS11	-0.170343134338785	3.24192786688829	-2.9668730203928	0.0243284750139782	0.649728401128981	-4.25607888708945
P22061-2	PCMT1	0.119890526270505	3.35369471495709	2.77207251231542	0.0315096882457076	0.684022815667235	-4.26278922455451
Q9GZR2-1	REXO4	-0.148143285870287	3.23884678332363	-2.72981094910274	0.0333496409998303	0.691548774563645	-4.26704453368269
O43819	SCO2	0.100297509168524	3.3473556635556	2.32214481047843	0.0582318224223203	0.77916608621583	-4.26855055462046
Q9BVM2	DPCD	0.0650587930438216	3.34417071594963	2.51292770278383	0.0447696250197598	0.754616969175221	-4.27633021041109
P27635	RPL10	-0.313246991002714	3.20420225570603	-3.13893195556283	0.0194429819819817	0.627167033091768	-4.27781718917952
Q9H1K1	ISCU	0.106571491769744	3.34026784359836	2.74705986297787	0.0325851787407781	0.68901867185418	-4.28400398191275
Q9P0S2	COX16	0.188825390255523	3.32741237436735	2.06142985397582	0.0837411756049392	0.800328542096179	-4.28742023441631
Q8IZD9	DOCK3	0.115758940710012	3.3212879319758	2.09044733654049	0.0804106032131928	0.800257563648142	-4.28743292630644
Q9Y3Y4	PYGO1	0.0965097205245785	3.32300701682244	2.17373618803045	0.0715803403083988	0.798946025571133	-4.28900345934359
Q9Y2Y9	KLF13	0.0860818400363163	3.33608474966442	2.32500970167318	0.0580010991514837	0.77916608621583	-4.29107427345153
Q01101	INSM1	-0.228301839052548	3.4055576235851	-1.79443468845312	0.121687617640003	0.826466793981307	-4.29194943657977
P01023	A2M	-0.131584455960612	3.2423909976041	-2.33996689853969	0.0568118484265518	0.77916608621583	-4.29363064309643
Q9Y4H2	IRS2	0.0744967819665028	3.33571230674869	2.62029467238238	0.0386713350462974	0.722929597801969	-4.29410848822986
Q5T3I0-3	GPATCH4	-0.133260041941445	3.23782773648167	-2.61392634824244	0.0390073365313812	0.723804711214353	-4.29419233949489
Q9H5J0	ZBTB3	0.141252347286546	3.32118089550843	2.12112604530325	0.0770355431536355	0.800257563648142	-4.29481357522014
Q9NPE2-2	NGRN	0.144203670667205	3.30367739148519	2.43978870583392	0.0494983753267472	0.77916608621583	-4.30040510844934
P31937	HIBADH	0.104933609704022	3.38326334448494	2.42862782828413	0.0502648315627114	0.77916608621583	-4.30175904341806
Q92664	GTF3A	-0.0860899092270493	3.26077445894845	-2.37435171858973	0.0541730668249748	0.77916608621583	-4.30446984986681
Q9UMX3	BOK	0.101977130525664	3.3287509201064	2.32529502963993	0.0579781723633831	0.77916608621583	-4.31025671115668
Q6AZW8	ZNF660	-0.194399171102942	3.23547367441669	-1.845075236261	0.113367953136306	0.819165892389037	-4.3113164445713
Q4VC44	FLYWCH1	-0.0895666101420524	3.29704937603943	-2.50195946781635	0.0454473846116744	0.757698796245836	-4.31291763894827
Q6UB35-1	MTHFD1L	0.156433592930679	3.3756713386842	2.95032516393735	0.0248640652919029	0.649728401128981	-4.31330348559027
Q9H4I3-1	TRABD	0.159507255951534	3.32998336496963	2.45984440697299	0.048151689604068	0.77636981180496	-4.31639634968123
Q7L7V1-1	DHX32	0.119600083399998	3.30235528578385	2.39313282384382	0.0527859885680242	0.77916608621583	-4.31891352144224
Q8TCS8	PNPT1	0.13011180975636	3.35357383052538	2.9479581182539	0.0249417113206984	0.649728401128981	-4.32004679497972
Q68D10-1	SPTY2D1	-0.173180967692138	3.20957723392995	-2.08568777238783	0.0809475350788324	0.800257563648142	-4.32588497947794
Q9Y2L6	FRMD4B	0.145069135019178	3.27897300330542	2.11334569585445	0.0778775906382618	0.800257563648142	-4.3278254989444
Q04837	SSBP1	0.220883968916778	3.3433233102973	2.74047761365198	0.0328746706459765	0.68901867185418	-4.32863302749688
P47914	RPL29	-0.472769799545898	3.19363255752082	-2.63695421657715	0.0378067838962171	0.720610436719419	-4.3308568246353
Q9BQI3-1	EIF2AK1	0.088931992200682	3.31358580600922	2.30190778193733	0.059888966001594	0.780650065584285	-4.33230575090808
Q9NSE4	IARS2	0.122602320288981	3.3561225361742	3.07089269474353	0.0212345466820039	0.629933028972188	-4.3330994786664
Q99966	CITED1	-0.238883053034863	3.31370466761466	-1.82368112160084	0.116812200846071	0.82130239854684	-4.33529192153801
Q9BSK4	FEM1A	0.0703562503992598	3.35276258067499	2.44462623546917	0.049169976669605	0.77916608621583	-4.3356812563515
P62269	RPS18	-0.230070933451979	3.26248327345795	-2.96132997555859	0.024506482629453	0.649728401128981	-4.33616634772613
Q9NVA1	UQCC; UQCC1	0.239924014579385	3.30713882447679	2.29896808410002	0.0601337244279832	0.780650065584285	-4.33643804287298
Q96BU1-1	S100PBP	0.0900868368916548	3.32884395521363	2.33413783014794	0.0572722778468561	0.77916608621583	-4.33653801274198
P07919	UQCRH	0.165389810497704	3.40431925452305	2.06587071549473	0.0832225335882376	0.800328542096179	-4.34122523128205
Q969V5	MUL1	0.103056957889372	3.33823065832834	2.25562301810506	0.0638652404376298	0.794145183792996	-4.34319206208988
Q9Y2C4	EXOG	0.157902976461419	3.38562028178437	1.95258086146815	0.0975259938311804	0.809378699915685	-4.34368143024836
Q9UPX8-3	SHANK2	0.147540481998172	3.31096436855843	1.90329533868809	0.104495166172062	0.813226094936196	-4.34737110007948
Q9GZM5	YIPF3	0.0834248392130264	3.30459683204505	2.35826815467775	0.0553911097221689	0.77916608621583	-4.34969194133271
Q9H819	DNAJC18	0.115962042584975	3.35720599940565	2.06181578950092	0.0836959730817204	0.800328542096179	-4.34991034268529
O75683	SURF6	-0.219123241022534	3.22090825730948	-2.68722023702703	0.0353203281198683	0.703438396658071	-4.35753626915023
Q9Y592	CCDC41; CEP83	0.0746606560380644	3.31315475652056	2.48619496364212	0.0464404831208549	0.766589836228607	-4.35772983552118
O43615	TIMM44	0.129913948561602	3.35074448786692	2.78169295666023	0.0311061867718602	0.681335594662755	-4.36046718326096
P09972	ALDOC	-0.0714725190808054	3.33492272721104	-2.81090428813046	0.0299145157157544	0.681331702203631	-4.36307513943807
Q8N8L6	ARL10	0.12181313042769	3.34172543868937	2.34485064980839	0.0564290508671481	0.77916608621583	-4.36773119862841
Q6P1Q0-7	LETMD1	0.105071035250006	3.34261786068145	2.42558170304768	0.0504761702469495	0.77916608621583	-4.36778493592216
Q9Y399	MRPS2	0.138700845744573	3.35803095175782	2.29686648521995	0.0603093380801679	0.780650065584285	-4.37592973947153
Q9BZE2	PUS3	0.100987891930685	3.31968400997623	2.3818849114501	0.0536121918056073	0.77916608621583	-4.37624323083549
P11137-4	MAP2	0.134595527564198	3.29824124735312	2.12041653482303	0.0771119456989268	0.800257563648142	-4.3762578294308
P13521	SCG2	0.134413841039677	3.34546368410221	2.89535585820767	0.0267363965422102	0.657962775593099	-4.37639268086291
P51512-1	MMP16	0.0992466805600901	3.30663741197481	2.40625420990865	0.0518389394680565	0.77916608621583	-4.37733800619318
O75083	WDR1	0.0499786907093526	3.33579726869896	3.10925209596619	0.020203466842677	0.627167033091768	-4.37836453551869
O95198-2	KLHL2	0.0973368759271271	3.32464579260543	2.0558511111609	0.0843973523862919	0.800328542096179	-4.37997808151758
Q9P275-2	USP36	-0.113391335645969	3.23873293834266	-2.95403262030294	0.0247429732172304	0.649728401128981	-4.3831193217736
Q96S94	CCNL2	0.0957944771950362	3.323216291485	2.57396414073777	0.0411876075772947	0.736259435923381	-4.38548485171115
Q69YU5	C12orf73	0.110818231525265	3.35688844307653	2.24997522598418	0.0643687772838793	0.794145183792996	-4.38653994808782
Q5VSG8-1	MANEAL	0.142047562778385	3.30009869795225	2.36262081401124	0.0550586843628508	0.77916608621583	-4.38942275604797
Q9Y3X0	CCDC9	0.0853546882221792	3.31916387465239	2.30631969016485	0.0595235674771294	0.780650065584285	-4.39408438983274
Q6UB28	METAP1D	0.148173417934629	3.39684487140801	2.23705498328672	0.0655361588616497	0.794145183792996	-4.39443093141714
P12694	BCKDHA	0.113233379828893	3.39963504063641	2.58163725770338	0.0407591838332592	0.73493215402778	-4.39465540516056
Q08345-5	DDR1	-0.212756579555983	3.32427912109348	-1.79437962055104	0.121696983234442	0.826466793981307	-4.39637513637732
Q9NZ45	CISD1	0.112712646166412	3.33081359134785	2.65912950274996	0.0366876780351885	0.707936305790119	-4.39779209955499
Q9Y421-1	FAM32A	-0.122784306922047	3.30529802044907	-2.414085521563	0.0512821806214681	0.77916608621583	-4.40121745134808
Q86TH1	ADAMTSL2	0.120068910243742	3.3485621134076	1.88410654693438	0.107340739793707	0.815361488070325	-4.40253716000681
Q8IWK6	GPR125; ADGRA3	0.0752711080526375	3.32559241175764	2.33907428882769	0.0568821041383317	0.77916608621583	-4.41374822254142
Q9NWR8	CCDC109B; MCUB	0.15640824464196	3.35441406168391	2.1797013846473	0.0709872717348315	0.797430500224524	-4.41425382941663
Q6ZN18-1	AEBP2	0.0674705763795821	3.33270699920705	2.37421975998883	0.0541829459835792	0.77916608621583	-4.41781023696985
Q9Y2W6	TDRKH	0.116107549295118	3.35372926285945	2.553539122779	0.0423513799618426	0.744812454350043	-4.42134209266652
Q6JQN1	ACAD10	0.0931394214803669	3.35452497836393	2.45654148011179	0.0483708028409014	0.77636981180496	-4.42438997133769
Q96KS0-1	EGLN2; RAB4B-EGLN2	0.126094729708897	3.34494734518142	2.05178673331673	0.0848786842233957	0.800328542096179	-4.42760888523283
P50553	ASCL1	0.103531075081116	3.40209233375681	1.98910252718151	0.0926632950708671	0.808487494800536	-4.42909381024143
P57105	SYNJ2BP	0.0914162772857637	3.34243966115822	2.33463678570377	0.0572327147654259	0.77916608621583	-4.43155469626443
Q96EL3	MRPL53	0.0859628684804779	3.37673363150119	2.33453356962445	0.0572408966234366	0.77916608621583	-4.43588338356978
O75436-1	VPS26A	0.045601254919619	3.30988889134305	2.78178080865996	0.0311025276355205	0.681335594662755	-4.43825808877556
Q9NP92	MRPS30	0.125854891921394	3.34951353112921	2.44760428663168	0.0489689456976902	0.77916608621583	-4.43830179315202
P36578	RPL4	-0.451637779653753	3.13895626678858	-3.24151405208794	0.0170450676132096	0.601006945527241	-4.44077965480252
Q9H078-2	CLPB	0.109508281446876	3.33122164676064	2.73633809328049	0.0330581346136476	0.68901867185418	-4.44376055732269
Q9H300	PARL	0.0882999936178266	3.35810265666939	2.29708827771495	0.0602907796224494	0.780650065584285	-4.44534385912048
P19823	ITIH2	-0.1916078568411	3.15420799904135	-2.07904413561682	0.0817031061609685	0.800328542096179	-4.44972970866562
O00423-3	EML1	0.053445576545884	3.31419858848431	2.66595604889262	0.0363502911055566	0.706584909853926	-4.45220595520136
P82921	MRPS21	0.127511483631172	3.34648610237178	1.8134811391434	0.11849036229582	0.822330490088492	-4.45246699893404
Q9BW92	TARS2	0.0693858733345546	3.36554824050701	2.69122968420795	0.0351296269824907	0.703438396658071	-4.45479829103537
Q9NW81-4	ATP5SL; DMAC2	0.143461449862379	3.38460811697015	1.82230560745811	0.117037137730743	0.82130239854684	-4.45817637969169
Q9H1U9	SLC25A51	0.108869747989254	3.35612702058722	1.95134617080714	0.0976947822708805	0.809378699915685	-4.45847496638714
Q9UK32	RPS6KA6	0.0852448628320276	3.33443493722658	2.15985861014367	0.0729797881869389	0.798946025571133	-4.46048032127401
Q9BSK2	SLC25A33	0.127167564133465	3.34713814000878	1.97789062060009	0.0941296623493637	0.808487494800536	-4.46149106932886
Q9H7T9-2	AUNIP	0.109722686078212	3.36489952212069	1.9648432331123	0.0958654310682286	0.809378699915685	-4.46177619572891
Q6XZF7	DNMBP	0.0970136485878669	3.32518953481552	2.51375231555293	0.0447191015641602	0.754616969175221	-4.46238030713489
P22033	MUT	0.0827276050334426	3.36576317287545	2.79250769344093	0.0306591824387302	0.681335594662755	-4.46372756475065
Q99797	MIPEP	0.108707274252499	3.3575754545478	2.62456556345632	0.0384477163441781	0.722929597801969	-4.46436444430539
Q5SVQ8-1	ZBTB41	-0.127053632336798	3.26159689960743	-1.82339542284498	0.11685888594464	0.82130239854684	-4.46500650646737
Q9HCK0	ZBTB26	-0.256443146531367	3.34398460807616	-1.85382056342162	0.111989055120167	0.81804545016262	-4.46534959555848
Q9H336	CRISPLD1	0.105748469105154	3.34728154998204	2.10122955616141	0.0792075973991045	0.800257563648142	-4.46579111296303
P98170	XIAP	0.0690124513083961	3.35964204198975	2.37367772213315	0.054223545669612	0.77916608621583	-4.46686924180476
Q96NT1	NAP1L5	0.138287440979264	3.3192664116198	1.96311524716055	0.0960977086143825	0.809378699915685	-4.46704817792419
Q7Z4G4	TRMT11	0.0624601247803392	3.34278478700712	2.45040984181756	0.0487803467688919	0.77916608621583	-4.46712201347929
Q6ZT21-1	TMPPE	0.124036941492737	3.33802177802792	1.81720293765385	0.11787530143605	0.821796475561169	-4.47005029205669
Q9Y330	ZBTB12	-0.0840428673878773	3.31312985033167	-2.22824417005192	0.0663447370941256	0.795839304749665	-4.47144708682127
P32322-3	PYCR1	0.0959557637246803	3.35642954914286	2.87992745063403	0.0272887819080023	0.65810894153181	-4.47444886154257
Q9NQ50	MRPL40	0.127207916106675	3.34859147511617	2.31789161650748	0.0585761107261947	0.780574874354821	-4.47491720635599
O95167	NDUFA3	0.194849429919521	3.32365267911235	2.06098611113983	0.0837931793508785	0.800328542096179	-4.47536939459947
Q9H867-4	METTL21D; VCPKMT	0.0999032168270676	3.35529494741481	2.00410178982683	0.0907374289949958	0.808487494800536	-4.47553527719662
Q9H6K4	OPA3	0.218173309761042	3.34232946947328	2.06979122264906	0.0827673692729503	0.800328542096179	-4.4767468521871
O75123	ZNF623	0.124744101047657	3.30420023478603	1.81761380029897	0.117807595294047	0.821796475561169	-4.47859575401189
Q9UPQ4	TRIM35	0.226522477796855	3.30521053381292	1.57852143113279	0.164317909182116	0.837706900464479	-4.48081732148678
Q8N4J0	C9orf41; CARNMT1	0.117909573954481	3.29237258422985	1.91194594244662	0.103236982465284	0.810046487182428	-4.48131769692784
Q9UKA2	FBXL4	0.214336391696304	3.29129290515983	1.74054831906634	0.131197346113891	0.831977927427241	-4.48249957880308
Q9Y3A4	RRP7A	-0.11959846519073	3.2486721186591	-2.45824938118265	0.0482573719445567	0.77636981180496	-4.48268564865348
O75879	PET112; GATB	0.0908287886898036	3.37046876211523	2.48935527732493	0.0462395836157046	0.766308487118318	-4.48294025547472
Q14644	RASA3	0.0500520956682862	3.33068050470406	2.61552755077021	0.0389225647979331	0.723804711214353	-4.48317651002172
Q8NDH6	ICA1L	0.0886521889329043	3.32786262042723	2.12292019925783	0.0768426865485963	0.800257563648142	-4.49106211986324
Q8WY41	NANOS1	0.115911982532158	3.33783206483086	1.78442529125781	0.12340159956603	0.827800256187094	-4.49469307109014
Q9BUQ8	DDX23	-0.0409218664081821	3.30179088796507	-3.03610808631013	0.0222189674827239	0.632140999781525	-4.49495846071328
Q8IWR0	ZC3H7A	0.0610504419286886	3.31403140340568	2.82466943801591	0.0293700010115813	0.672605297891599	-4.49550098558027
O14925	TIMM23	0.183944683784431	3.35846372354185	2.30513811542061	0.0596211995076364	0.780650065584285	-4.49599233886827
Q6UWS5	PET117	0.144393260031388	3.34968504974277	1.69589897666638	0.139620919590325	0.831977927427241	-4.49664571706427
Q96I59	NARS2	0.0674221273511633	3.36014775276485	2.5332071876645	0.043544371739868	0.751279657916593	-4.49796192482348
Q9Y4W6	AFG3L2	0.149770189045877	3.3563799697898	2.91247055427422	0.0261376734501398	0.656363341212298	-4.49836922326767
Q96SJ8	TSPAN18	0.110373901611679	3.31088630478364	1.92438077386776	0.101454784928675	0.809378699915685	-4.50146758472993
A4D1E9-1	GTPBP10	0.138972268344561	3.36211140995049	2.70091454881327	0.034673492584272	0.703438396658071	-4.50147008454716
P28331-2	NDUFS1	0.147196264636582	3.35116679044586	2.89938778542029	0.0265940310542043	0.657962775593099	-4.50378546613611
Q9BUR5-1	APOO	0.160652948605838	3.3483890146799	1.86844374478109	0.109720316466645	0.817198122281546	-4.50557783599634
Q8IZE3-2	SCYL3	0.0723518909290599	3.31408288040762	2.24400032202374	0.0649059387635087	0.794145183792996	-4.51142902407619
Q9Y606-2	PUS1	0.0663028322116453	3.32714739305058	2.54847977256789	0.0426449822917819	0.746824731899777	-4.51221348613103
A8MXV4	NUDT19	0.163289748145542	3.31283362877549	2.24353493930415	0.0649479716377257	0.794145183792996	-4.51447017489703
Q8NCH0	CHST14	0.134380087840929	3.3096886113059	2.31325067410141	0.0589541973326103	0.780650065584285	-4.51507075090006
Q8WUM9	SLC20A1	0.131982448407366	3.33652761309709	2.05338421900718	0.0846891683058653	0.800328542096179	-4.51763653749638
P61353	RPL27	-0.379899986935695	3.22404703303971	-2.71542252987574	0.0340019632061268	0.698563363965373	-4.51796949809845
O00217	NDUFS8	0.110847616254243	3.40301896143516	2.33637504040169	0.0570951070822217	0.77916608621583	-4.51831496208947
Q9NS18-2	GLRX2	0.104888455550357	3.38028524568159	1.90272094128753	0.104579247208801	0.813226094936196	-4.51854028152081
O14949	UQCRQ	0.198661540268276	3.31994560935466	2.19986141200827	0.0690199650187106	0.797430500224524	-4.51946509607454
O43426	SYNJ1	0.0643518537949775	3.32267110107175	2.66569047092857	0.0363633548857167	0.706584909853926	-4.52110262527642
Q9ULE0	WWC3	0.136783509557062	3.28568267749263	1.7057329041466	0.137721850307564	0.831977927427241	-4.52215199182529
Q96BY7	ATG2B	0.0673586419197634	3.32090659270949	2.74070999788016	0.0328644036144211	0.68901867185418	-4.52256997592733
Q92520	FAM3C; WNT16	0.0810614441096801	3.32054059815589	2.50040857719346	0.0455440864030207	0.75779541767581	-4.52359023697279
Q16795	NDUFA9	0.156475082048807	3.33887828580737	2.56706408091149	0.0415769332515619	0.736259435923381	-4.52770342625202
Q13505-1	MTX1	0.116406272199948	3.33900456682294	2.38934543269392	0.0530626936262033	0.77916608621583	-4.5325150599489
O00625	PIR	0.0614595968453634	3.34614098189212	2.60169108200914	0.0396615952297918	0.7271364266008	-4.53422099499943
Q96RP9	GFM1	0.111407040590482	3.36563654445859	2.83404474299722	0.0290052246257197	0.671632090222221	-4.53428816688982
Q9Y233-2	PDE10A	0.115688485752262	3.28823765887692	1.90775105724136	0.103845212053455	0.811238297216427	-4.53508071895345
P30281-1	CCND3	0.119433233353333	3.35467052260226	1.81641602267747	0.118005084122687	0.821796475561169	-4.5364188539041
Q9Y6B2-1	EID1	0.119069370173654	3.42232158386613	2.01108982361377	0.0898539889442656	0.808487494800536	-4.54179466376786
Q9BWM7	SFXN3	0.16310596696731	3.33248383243678	2.30641163930144	0.0595159767897006	0.780650065584285	-4.54482218193499
Q96CU9	FOXRED1	0.118516839305898	3.35664235098018	2.3463689718196	0.0563105892214483	0.77916608621583	-4.54629574626316
Q71F23	MLF1IP; CENPU	-0.0749896371015839	3.26235939498293	-2.52177425022526	0.0442307243145983	0.7540026950644	-4.54999182390463
Q9H1U4	MEGF9	0.12361521785406	3.33484368327985	2.10817721840338	0.0784421392646057	0.800257563648142	-4.55026722169561
Q9NY97-1	B3GNT2	0.107406907155173	3.32251751916929	1.88748197236397	0.106834667749333	0.815361488070325	-4.55080214011748
Q96IX5	USMG5	0.143517865998416	3.35297588655197	2.0582448894822	0.084115158558941	0.800328542096179	-4.55488080081892
P31152	MAPK4	0.0853145523768834	3.32064914315894	2.07512297744786	0.0821524093375174	0.800328542096179	-4.55502402828527
Q53SF7-1	COBLL1	0.109499368768815	3.31610792081516	1.91973777751675	0.102116618162346	0.809378699915685	-4.55518893687151
Q330K2-1	NDUFAF6	0.196514279045451	3.32058739708784	1.92480893189148	0.101393969176645	0.809378699915685	-4.55622453342535
Q9HC56	PCDH9	0.106647967208904	3.33160616133141	1.83407580164051	0.11512606887062	0.82130239854684	-4.56446234890738
Q53S58	TMEM177	0.138111904363774	3.34449212742949	1.77613097104692	0.124839773668071	0.829373171398803	-4.56455787023532
P54284	CACNB3	0.0804063132350874	3.32005337703685	2.40778818673172	0.0517293876146799	0.77916608621583	-4.56507757650386
Q92540	SMG7	0.0697937516837287	3.32896380428405	2.63171252837581	0.0380765710131828	0.722929597801969	-4.56576499395122
Q9UGU5	HMGXB4	-0.163058809677102	3.27629848366398	-2.29941850960457	0.0600961549926409	0.780650065584285	-4.56982155014571
Q9BSW2-2	EFCAB4B; CRACR2A	-0.269922771344739	3.26788789699952	-1.25441528899513	0.255255480577186	0.849130999380513	-4.5708780810691
P46777	RPL5	-0.211838339940061	3.23749491856755	-3.13300525138629	0.0195923203589358	0.627167033091768	-4.57088413760521
Q96AG3	SLC25A46	0.160671218367357	3.3476465400495	2.32432713599345	0.0580559831445712	0.77916608621583	-4.571164522407
Q9HCD6-2	TANC2	0.145480849851378	3.27669457450164	1.76662576703821	0.126508049235203	0.83071529676436	-4.57261775633645
Q9Y2G9	SBNO2	0.113211313292164	3.30909077127886	1.7773171611473	0.124633097418948	0.829373171398803	-4.57399495442834
Q9BY27	DGCR6L	0.149402189358868	3.29483490527872	2.01222147413075	0.0897117409334791	0.808487494800536	-4.57528919801626
Q9BSF4	C19orf52; TIMM29	0.114361097090075	3.33816662756035	1.98767344963784	0.0928489158543945	0.808487494800536	-4.58038471570188
Q15526	SURF1	0.151593575250657	3.33439381756279	2.06240369275442	0.0836271626852106	0.800328542096179	-4.5815753592939
Q96ME7	ZNF512	-0.176245089888639	3.16015929723771	-2.19174486160402	0.069805198066665	0.797430500224524	-4.58459964096176
Q96IK1	BOD1	0.0563165044419434	3.32124706421741	2.36977755625844	0.0545166120109374	0.77916608621583	-4.58511285690719
Q14249	ENDOG	0.0665888647032021	3.36362827229521	2.39178855038279	0.0528840277753119	0.77916608621583	-4.58618344092172
Q96D15	RCN3	0.107939382680387	3.31877677212452	1.85338319881051	0.112057620339547	0.81804545016262	-4.58726194821852
Q9HCM1	KIAA1551	0.0692212181886477	3.32693936807597	2.24175289535626	0.0651091836392201	0.794145183792996	-4.59565887150496
Q8NDZ2-1	SIMC1	0.07265598658266	3.31819117518352	2.18733592200597	0.0702355770666309	0.797430500224524	-4.59912222017834
Q5TDH0-3	DDI2	0.073180895032268	3.34894621684328	2.32860901079309	0.0577125743186106	0.77916608621583	-4.60014630034071
Q86Y97	SUV420H2; KMT5C	-0.130110236678577	3.27496555842273	-1.62798935148387	0.153439802399833	0.832891722183645	-4.60104322121258
Q08495-1	DMTN; EPB49	0.220445443344608	3.2775095069296	1.3254129344771	0.2321392351484	0.844697015986012	-4.60189485197239
Q9UET6	FTSJ1	0.0614867880632928	3.3230393402551	2.30006831733639	0.0600419981751331	0.780650065584285	-4.60302287910464
P62854	RPS26; LOC101929876; RPS26P25	-0.355385962757766	3.20523464127049	-2.46804983837342	0.0476118426417764	0.771132669863078	-4.60377485949743
O75947-1	ATP5H	0.149183344651059	3.36380495675675	2.43485003199711	0.04983601082523	0.77916608621583	-4.60506736608808
Q9NRP2	CMC2	0.0891239992336737	3.33226728782748	2.18820893264966	0.0701501424029258	0.797430500224524	-4.6055174527441
Q9P2R7	SUCLA2	0.0817343140827951	3.36052771772478	2.66016394297236	0.036636339959256	0.707936305790119	-4.60778505199427
Q03933-2	HSF2	0.060941894401475	3.34878211234666	2.30293299641136	0.0598038499102439	0.780650065584285	-4.60787142677349
Q96EP9	SLC10A4	0.0932328064382772	3.32718201582177	2.25382244896896	0.0640253297919144	0.794145183792996	-4.60820022610201
Q5HYK3-1	COQ5	0.103620131471454	3.37463724921088	2.32516017390263	0.0579890071732356	0.77916608621583	-4.61043893814821
Q9Y5W7	SNX14	0.120587799175289	3.3146307100178	2.16673578098319	0.0722828101117595	0.798946025571133	-4.6105085452528
Q9BVV6-3	KIAA0586	0.101746208097162	3.325100051079	2.39846800436898	0.052398755352491	0.77916608621583	-4.61208987517988
Q96GS6-2	ABHD17A; FAM108A1	0.128196267476328	3.29189528572056	1.61751394949813	0.155684633301407	0.836128786680491	-4.61287323015503
Q9UJZ1	STOML2	0.187636334925758	3.34758200069101	2.33515572593389	0.0571915971878127	0.77916608621583	-4.61362044934079
Q96CB9	NSUN4	0.0854822330988009	3.37060050894687	2.194336972077	0.069553433264111	0.797430500224524	-4.61384203006603
Q05932-1	FPGS	0.0768358605719558	3.3344131935663	2.29360269443159	0.0605831205577461	0.782141509903992	-4.61390164415316
Q8N5U6-2	RNF10	-0.0815092055639374	3.30049565283299	-2.07238676748982	0.0824674203309775	0.800328542096179	-4.61396497582286
Q3SY69-1	ALDH1L2	0.0899888002645444	3.37125368461845	2.4762377367858	0.0470794771642678	0.769518669884973	-4.61442365877497
P09488	GSTM1	0.153132860609744	3.28564172349167	1.85654605595336	0.111562715447795	0.81804545016262	-4.61621303372484
Q8IZU2-1	WDR17	0.0625827498247801	3.32277457323011	2.43255118595396	0.0499939945065142	0.77916608621583	-4.61698215480257
Q96KP4	CNDP2	0.0492788088561669	3.34953206335979	2.71313496854836	0.0341069204815147	0.698563363965373	-4.61765626704806
Q8N6V9	TEX9	0.12254438651851	3.32630846944424	1.71804724865325	0.135378963927544	0.831977927427241	-4.61948491138055
Q15438-1	CYTH1	0.0675372040101994	3.32111284885729	2.38238910646396	0.0535748694092477	0.77916608621583	-4.62192350444063
Q9H8X2	IPPK	0.0981240998108	3.36968014068146	1.91191191673848	0.103241901666442	0.810046487182428	-4.6219808877548
Q8N1S5-1	SLC39A11	0.10621184865244	3.3036494322707	1.74982109933692	0.129510827114559	0.831977927427241	-4.62286141467558
Q99758	ABCA3	0.0662508222499659	3.29852463571294	2.37340153015962	0.0542442451764892	0.77916608621583	-4.62461318095287
Q9P2G9	KLHL8	0.102086218179302	3.37633267659742	2.09559219485198	0.0798342752136488	0.800257563648142	-4.62530477219643
P55809	OXCT1	0.0849512836929204	3.36566959263452	2.61718641606545	0.0388349460952932	0.723804711214353	-4.62846700328148
P42898-2	MTHFR	0.0825236678393708	3.29929070375799	2.38384261000908	0.0534674272366868	0.77916608621583	-4.62931178428522
O14544	SOCS6	0.091124400847848	3.35106397532022	1.95641127801843	0.0970042113239354	0.809378699915685	-4.6345434366005
Q8N6M6-4	C9orf3	-0.135794477534358	3.31417581896664	-1.49234463559254	0.185024229220306	0.842176722648431	-4.63556275206054
Q9NX47	MARCH5	0.138805528393695	3.34900956287341	2.07155187175769	0.082563782923987	0.800328542096179	-4.63992844237217
Q8TDB4	MGARP	0.162706773108515	3.35150982023926	1.6066560464786	0.158044407787123	0.836481386230769	-4.64000790895419
Q6NSI8-1	KIAA1841	0.0912111178045807	3.31663186782842	2.06688671241949	0.0831043350163945	0.800328542096179	-4.64108506972816
Q86VR2	FAM134C; RETREG3	-0.0902164085344401	3.31072972098394	-1.85538961435593	0.111743417484966	0.81804545016262	-4.6419240143185
Q96HB5-4	CCDC120	0.126578706047814	3.34212896877148	1.7865069083023	0.123043213846928	0.827456862194641	-4.64205096545907
O60927	PPP1R11	0.196499286003629	3.28071311889926	2.1999030056159	0.0690159645030641	0.797430500224524	-4.64424759624671
O60830-1	TIMM17B	0.217577181658379	3.33449907370802	2.07933745245395	0.0816695970712867	0.800328542096179	-4.64670660476591
Q2M1P5	KIF7	0.069815854775287	3.31627193335358	2.31774863429247	0.0585877215100771	0.780574874354821	-4.65111770850368
O00458	IFRD1	0.0969053379780045	3.32563872037495	2.44041075829845	0.0494560185056256	0.77916608621583	-4.65130106399678
Q8NE86	MCU	0.152198008257514	3.34111083063664	2.25552437637658	0.0638740000083953	0.794145183792996	-4.65504043811361
Q9NX14-2	NDUFB11	0.135660788688361	3.38985729887526	2.30076805584445	0.0599837365272103	0.780650065584285	-4.65531213301641
Q7L3T8	PARS2	0.098239002560946	3.39067714034995	2.15232698673961	0.073750986435941	0.799464529167756	-4.65553927097469
Q96AP4-1	ZUFSP	0.0796111176191849	3.34395353276131	2.10976268073756	0.0782685187782303	0.800257563648142	-4.65752581750622
Q96F63	CCDC97	0.0843929881732764	3.32912884611691	2.08510022974053	0.0810140685008765	0.800257563648142	-4.65826302527716
Q13480-2	GAB1	0.0588096699606499	3.32447387718696	2.24738843246708	0.0646007725487352	0.794145183792996	-4.65840231921172
Q6TDP4	KLHL17	0.10873666144494	3.29349585744138	1.77632904040056	0.124805239707053	0.829373171398803	-4.65848156437126
Q8N573-2	OXR1	0.0738807991222503	3.32038837801168	2.13968004976958	0.0750647577502546	0.800257563648142	-4.65858559687728
Q9NQX6	ZNF331	-0.10623715585835	3.31234670952849	-1.98805837390625	0.0927988818714603	0.808487494800536	-4.65906760816172
Q02878	RPL6	-0.498866580095653	3.14037252673495	-3.00884650556201	0.0230250086274647	0.640904861726876	-4.66023426871448
Q96GS4	C17orf59; BORCS6	0.0990997487505954	3.31298125701078	2.01849880897792	0.0889267935171874	0.808487494800536	-4.66036345902966
Q9Y3B7-1	MRPL11	0.0830563882141204	3.36208416268305	2.53227486503398	0.0435999192052196	0.751279657916593	-4.66108064795637
Q9BXM9-1	FSD1L	0.0556423156890854	3.34839200484915	2.37614412363825	0.0540390631572428	0.77916608621583	-4.66297455679278
O43181	NDUFS4	0.117510544259306	3.33310691970179	2.09329712052161	0.0800908493352537	0.800257563648142	-4.6631288955117
Q8WWC4	C2orf47; MAIP1	0.168560311622053	3.35762307429622	2.27507412961103	0.062161958494507	0.789124382582136	-4.66383441614687
P56181-2	NDUFV3	0.115517607856609	3.34635217265484	2.45743259581531	0.0483115842116392	0.77636981180496	-4.66663275322353
Q96MP5	ZSWIM3	0.0919185238454453	3.33114475526609	1.95123304302079	0.0977102620184692	0.809378699915685	-4.66725177709512
P19021-5	PAM	-0.0645868947020838	3.31491445953462	-2.4101491590992	0.051561246783902	0.77916608621583	-4.66773801195283
Q9NPF5	DMAP1	-0.0555529726343877	3.28865213285252	-2.4088341709655	0.0516548254115677	0.77916608621583	-4.66795699102565
O60303	KIAA0556	0.0763452919818883	3.31957180498717	2.02029925356245	0.088702937863991	0.808487494800536	-4.66924193826677
Q8N5M1	ATPAF2	0.144856830385	3.32407512505301	2.01294370633316	0.0896210752775899	0.808487494800536	-4.67248428001892
P43304	GPD2	0.11492415136121	3.35100957824365	2.58129164581043	0.0407783791860207	0.73493215402778	-4.6783404341978
O60346	PHLPP1	0.0806681635488124	3.32717021182905	1.92682041743627	0.101108743140902	0.809378699915685	-4.67929471708943
P46778	RPL21	-0.232465829750323	3.22913320456925	-2.73744246055233	0.0330090823337906	0.68901867185418	-4.68073138660346
P46776	RPL27A	-0.398100606178283	3.21182692427488	-2.50653263176123	0.0451634921964019	0.754616969175221	-4.68087836957401
Q96HE9	PRR11	-0.0901553986949897	3.25011880371902	-2.40142538423341	0.0521853843556472	0.77916608621583	-4.68163873921293
Q92187-1	ST8SIA4	0.0840776857396658	3.38233889272557	2.01742959693895	0.0890600019477566	0.808487494800536	-4.68190157057555
Q9Y561	LRP12	0.100712187140363	3.33774512951527	1.82828393485079	0.116062595096133	0.82130239854684	-4.68193227983372
Q9H4B0	OSGEPL1	0.102610033312392	3.36534215829485	2.01356581245457	0.0895430530059545	0.808487494800536	-4.68227085579898
Q86WX3	RPS19BP1	-0.124295374171378	3.26513284771271	-2.23430172990098	0.0657877316763783	0.794792074281579	-4.68296254027901
Q8NDV1-1	ST6GALNAC3	0.0843634514305176	3.29528347983543	1.90713359141585	0.103935040958151	0.811238297216427	-4.68469962000865
Q9P291	ARMCX1	0.122678498829185	3.31921003819363	1.92921761006261	0.100769869391127	0.809378699915685	-4.68695239476156
Q68CZ1	RPGRIP1L	0.0614129992156832	3.33156008137441	2.40816131752053	0.0517027763700928	0.77916608621583	-4.6870404268555
Q6GMV3	PTRHD1	0.144080373895234	3.34148742406872	2.14919444762065	0.0740741911194327	0.800257563648142	-4.6873440295791
P08708	RPS17; RPS17L	-0.0658825863935461	3.29117167967158	-2.82698634909333	0.0292793989127597	0.672377601478692	-4.6889260022
Q969Y0	NXPE3	0.162096240086526	3.28817046812464	1.3670146535519	0.219476635558958	0.844697015986012	-4.69002183107881
Q02127	DHODH	0.14270903182462	3.35562205936469	2.30771682757968	0.0594083375906824	0.780650065584285	-4.69018522027247
P40429	RPL13A	-0.428066209575817	3.16397014331954	-2.85669512682176	0.0281438387489877	0.666497272191935	-4.69060580519556
Q96MD2	C12orf66	0.116210528652603	3.21808932046048	1.95410922073618	0.0973174635149655	0.809378699915685	-4.69143814761454
Q9BYD3	MRPL4	0.0972647559214314	3.38585866203379	2.33591845621915	0.0571312189147396	0.77916608621583	-4.69447812639346
Q6TCH7-1	PAQR3	0.10886498428259	3.29305496878274	1.70456632684907	0.137945821642767	0.831977927427241	-4.69999742670419
O14874	BCKDK	0.102041838264104	3.35528159255329	1.91676896254965	0.102542059678218	0.809378699915685	-4.70231524191854
Q8IZ21-2	PHACTR4	0.0592423426311497	3.31580037361635	2.35976727355364	0.055276382333433	0.77916608621583	-4.70243058993191
Q92574-1	TSC1	0.0504397806686917	3.31749855768537	2.51590617688741	0.0445874189105834	0.754616969175221	-4.7024879302483
Q92747	ARPC1A	0.0635129387242807	3.32421032502614	2.58874270116258	0.0403666564668598	0.734708402418653	-4.70254311575783
Q14651	PLS1	0.0724301302901264	3.31338941193531	2.23937503368422	0.0653249388288877	0.794145183792996	-4.70598736606811
Q9BUI4	POLR3C; LOC101060460	0.0626085828188515	3.31638113202972	2.42979665051412	0.0501839852464148	0.77916608621583	-4.71205119945151
Q96DC8	ECHDC3	0.106248063019099	3.38952442055487	2.03767380547825	0.0865717043418475	0.805708062878273	-4.7122382067222
Q9GZT3-1	SLIRP	0.107458625518477	3.39814854474636	2.42767298818224	0.0503309780924088	0.77916608621583	-4.71488293054902
P62277	RPS13	-0.267317343021107	3.19017911042363	-2.53848863093412	0.0432311103099312	0.751279657916593	-4.7168238784546
Q8WWV3-1	RTN4IP1	0.115142155820284	3.36867252252886	2.24822976749825	0.0645252233433158	0.794145183792996	-4.71711338177345
Q9BWG6-1	SCNM1; TNFAIP8L2-SCNM1	0.0662807133208009	3.37218818200526	2.22673732845293	0.0664840472223608	0.795839304749665	-4.71787568974746
A6NNL5	C15orf61	0.132661667258614	3.3573389894189	1.4984382906664	0.183483503518989	0.842176722648431	-4.7187493823009
O43896	KIF1C	0.0655672754272728	3.32210936818702	2.25613429600096	0.0638198578661544	0.794145183792996	-4.71962411769345
Q8NEC7-1	GSTCD	0.060107038501099	3.31288657765955	2.37072653787	0.0544451520041129	0.77916608621583	-4.72181362713358
Q96BW1	UPRT	0.0972969656612878	3.33216092564375	1.82849636668376	0.116028113383646	0.82130239854684	-4.72669681713972
Q96T92	INSM2	-0.0841939207679288	3.31912705393877	-2.00519769079299	0.0905983070623393	0.808487494800536	-4.72907181027654
Q93073-1	SECISBP2L	0.0940050979960885	3.32720904578326	1.91616550405565	0.102628753096315	0.809378699915685	-4.7308634337696
Q06945	SOX4	0.0758389717596189	3.42687768903162	1.86675614224446	0.109979803869497	0.817198122281546	-4.73192733752767
Q8IUX1-1	TMEM126B	0.209121652605243	3.32236102621413	1.92155391792353	0.101857226545502	0.809378699915685	-4.73351640610418
O00213	APBB1	0.0710400939074742	3.32989462924941	2.4321889696966	0.0500189348809696	0.77916608621583	-4.73353984204043
P61247	RPS3A	-0.207904567604366	3.25586099725795	-3.0368779561048	0.0221966526784895	0.632140999781525	-4.73372963527734
Q9UIM3	FKBPL	0.0943171351788557	3.33034987965995	2.08416438420273	0.0811201585032006	0.800257563648142	-4.73776924029626
P62851	RPS25	-0.291947612835524	3.25837056461427	-2.35465903024042	0.0556683334254245	0.77916608621583	-4.73894365560473
Q96HQ2-1	CDKN2AIPNL	-0.121775275629367	3.33037444637792	-1.76530069336694	0.126742336810057	0.83071529676436	-4.73973656277686
Q9Y5K8	ATP6V1D	-0.0583242921321518	3.31497828065868	-2.3432194478012	0.0565566083764903	0.77916608621583	-4.73973769649075
P51398-1	DAP3	0.187919320490408	3.34591049868052	2.44120567855125	0.0494019460123335	0.77916608621583	-4.74112139432928
Q86WT1	TTC30A	0.105625093850998	3.28190432314442	1.56459243109038	0.167510290217558	0.837706900464479	-4.74165305579272
Q8TD22	SFXN5	0.113837518842502	3.35733523913429	1.74480034494351	0.130421359374437	0.831977927427241	-4.74314574568855
Q9Y2M5	KLHL20	0.083480972615984	3.31476490873725	1.8805247863989	0.107880348051881	0.815361488070325	-4.74437976399691
Q8TEZ7	PAQR8	-0.178144034028707	3.31988986378457	-1.0853657241238	0.318458002379774	0.85858695849907	-4.74774867797368
Q86YH6-1	PDSS2	0.0973583733965675	3.34982914795418	2.1692797690324	0.0720267154248521	0.798946025571133	-4.75158867811883
Q8N2F6-1	ARMC10	0.104424554055527	3.35218992761401	2.15704288362913	0.0732671335114981	0.798946025571133	-4.75678823544756
Q6ZVF9	GPRIN3	0.0847684059848344	3.34352553576747	2.00725068472553	0.0903382622835153	0.808487494800536	-4.75808688462323
P46940	IQGAP1	-0.0395805673235008	3.2984705801513	-2.93787162654999	0.0252755201625799	0.650298568133538	-4.75886902468658
O95169	NDUFB8	0.10881341338442	3.33491959962688	2.11118640957002	0.0781129428237017	0.800257563648142	-4.75891509750809
Q709F0-1	ACAD11	0.105408432105005	3.32064725319073	1.61173407476479	0.156936585014862	0.836128786680491	-4.75995974520288
Q6UWJ1	TMCO3	0.0887275398709243	3.29656902374968	1.90051101247466	0.104903367233143	0.813226094936196	-4.76179758356939
P23368-1	ME2	0.104453037485895	3.35252101961248	2.50639499562011	0.0451720090713094	0.754616969175221	-4.76323943278415
O95405-1	ZFYVE9	0.111877088873695	3.3048369677744	2.44461161570754	0.0491709656951905	0.77916608621583	-4.76410759436334
Q9Y6Q9-1	NCOA3	0.0738265530999145	3.33818382209988	2.42261791332503	0.0506826890156945	0.77916608621583	-4.76480481983663
Q99622	C12orf57	-0.230879556765681	3.39040893751722	-1.85757791288198	0.111401724471717	0.81804545016262	-4.76557835128491
P05141	SLC25A5	0.113104132245103	3.3751454002908	2.20614854183352	0.0684179575432885	0.797430500224524	-4.76658307448488
O75390	CS	0.152392093277251	3.33264593765065	2.678833701954	0.0357227870772384	0.703438396658071	-4.76903090260212
Q8IVB5	LIX1L; LOC101060547	0.0718752040403735	3.35419026950833	2.1156519716124	0.0776270148858859	0.800257563648142	-4.76927134416421
Q3T906	GNPTAB	0.0856901686191321	3.32118035463299	1.89655687176893	0.105485796482641	0.814194073591941	-4.76958297280437
Q86UA6-8	RPAIN	0.068728609829125	3.33619897636219	1.92989809787899	0.100673880409185	0.809378699915685	-4.7702961294815
Q69YL0	LOC152217; NCBP2-AS2	0.122914082011476	3.37775911660859	1.57014197164588	0.166231443515073	0.837706900464479	-4.77218052389778
Q86TW2-1	ADCK1	0.137045985018549	3.33028907320349	1.45921007301497	0.193613942600995	0.843173051975301	-4.77445751719048
P51955	NEK2	0.105267294365167	3.33067385004296	1.71272633154051	0.13638653395296	0.831977927427241	-4.77449472151556
Q9UMS6-2	SYNPO2	0.0715627960099221	3.32676719952178	2.48713581591323	0.0463805779156752	0.766589836228607	-4.77476454286527
Q8N3J2	METTL4	0.108900249740998	3.33971772910393	1.63293535045912	0.152390654056856	0.832891722183645	-4.77639190869286
P61513	RPL37A	-0.246407107809548	3.23027058692611	-2.68576592966088	0.0353897712580249	0.703438396658071	-4.77702364577846
P11182	DBT	0.0853177635016686	3.3810517461425	2.18100816166689	0.0708580239914174	0.797430500224524	-4.77842859252647
Q07617	SPAG1	0.0856464526523838	3.32658384449259	1.86349786222045	0.110482519651068	0.817198122281546	-4.77845279027266
P42575-1	CASP2	0.0541492605026753	3.37567466380108	2.25485851597654	0.0639331621114912	0.794145183792996	-4.78002076303954
Q969Z0-1	TBRG4	0.146324083214653	3.33791070437252	2.52976843589376	0.043749622001213	0.751279657916593	-4.78215824716271
P11908-2	PRPS2	-0.0712523773880901	3.3519769149026	-2.24289676718114	0.065005656306805	0.794145183792996	-4.78365647680998
Q9BRJ6	C7orf50	-0.115557677251605	3.26676213417212	-2.21335171622548	0.0677348651412478	0.797430500224524	-4.78405682112618
P57721-1	PCBP3	0.0455475401443416	3.32738327298081	2.33134889746898	0.057493941205592	0.77916608621583	-4.78427921401743
O94868	FCHSD2	0.0538857312203811	3.32354154294045	2.38976304625717	0.053032108858517	0.77916608621583	-4.78578193585714
Q8N0V3-1	RBFA	0.0742927361333346	3.35058723933459	2.03019982898749	0.0874820833460093	0.808390347610093	-4.78789673947599
Q10587	TEF	0.0958924112250981	3.32542756653386	1.65869267957641	0.147036878538889	0.832891722183645	-4.78796049569383
Q8N6C5-4	IGSF1	0.107545574845354	3.27611052808309	1.73472704137096	0.132266998086288	0.831977927427241	-4.78923007205297
Q14839-2	CHD4	-0.0372834322561716	3.30166887916076	-3.23785668472709	0.0171247910043155	0.601006945527241	-4.78942883759168
P09874	PARP1	-0.0251212768966027	3.31579235661597	-3.20670160359406	0.0178206304700616	0.607506395009319	-4.79214338266736
Q9UKU7	ACAD8	0.110645599606632	3.37473018012191	1.88594602453491	0.107064655699627	0.815361488070325	-4.79233320742066
Q86XK3-2	SFR1	0.0937879981047989	3.34886957676225	1.75361363446724	0.128827141337753	0.831977927427241	-4.79733282357943
Q01850	CDR2; LOC101060399	0.0708485030837184	3.32785100044578	2.20543516870561	0.0684859924838876	0.797430500224524	-4.79941619094448
Q8NFV4	ABHD11	0.0998321531627619	3.36716002958553	1.78329119854161	0.123597282456304	0.827935143244545	-4.80309336976999
Q5T9A4	ATAD3B	0.144648428745691	3.34871478748625	2.45565215057831	0.0484299786634572	0.77636981180496	-4.80477936198567
Q9Y5S2	CDC42BPB	0.0761859347537674	3.29737642066835	2.68602764675074	0.0353772635628919	0.703438396658071	-4.80624295779119
Q86UY8	NT5DC3	0.130983917521889	3.33156634307254	2.2984472432533	0.0601771974580505	0.780650065584285	-4.80721814654023
P83369	LSM11	-0.174131673662923	3.27956706463814	-1.07508484492055	0.322691091767944	0.85858695849907	-4.80951887251046
Q9Y6G3	MRPL42	0.0871838210586908	3.34567220867113	1.96924357362102	0.0952764706403669	0.808544042593152	-4.81034997969285
Q9H2S9	IKZF4	0.0957707735746823	3.35343013312667	1.85122863038233	0.112395995722507	0.81804545016262	-4.81198258097574
Q7KZN9	COX15	0.156778084999849	3.35183458079726	1.99234086313797	0.0922440512725899	0.808487494800536	-4.8145593541764
Q6PI78	TMEM65	0.093733988510702	3.34788552084077	1.82448646632879	0.116680700849425	0.82130239854684	-4.81463141955215
P62847-4	RPS24	-0.194983545087672	3.24760650517223	-2.67594558054712	0.0358625110692318	0.703438396658071	-4.81698872956729
Q9NX20	MRPL16	0.0849263113438247	3.37915596775543	1.84286800551992	0.113718613300456	0.819353915408639	-4.82236353916292
P18124	RPL7	-0.258431854419013	3.20921338062236	-2.79544354803595	0.0305390247954443	0.681335594662755	-4.82307616527
Q9BQP7	C20orf72; MGME1	0.128205560081893	3.35632358341421	2.46934392978161	0.0475272840005566	0.771132669863078	-4.82408428590631
Q9NUT2-1	ABCB8	0.128668178573753	3.33610344724379	1.90202949917762	0.104680550643192	0.813226094936196	-4.82416382756076
Q5T6X4	FAM162B	0.175620443840049	3.33772467207778	1.65319365143013	0.148164538357378	0.832891722183645	-4.82743350729676
Q9Y4E5-4	ZNF451	0.0899245842046642	3.40281814694435	1.70484135254493	0.137892987734433	0.831977927427241	-4.82791463667713
Q86SK9-1	SCD5	-0.0986096916233954	3.31816438175466	-1.75934629186585	0.127800374271418	0.83144027937145	-4.82855952215438
P02774-3	GC	-0.197121726639914	3.13718368641307	-1.77538390908095	0.124970110109539	0.829373171398803	-4.83211861349269
Q9UP95	SLC12A4	0.0662269673341899	3.29226097357993	1.97288413590865	0.0947919453259119	0.808544042593152	-4.83273897935812
P61803	DAD1	-0.112640157919936	3.37719325843885	-1.79806684007938	0.121071441837231	0.826466793981307	-4.83320980425934
O75064	DENND4B	0.0843472199836844	3.29518057175688	1.87421299074927	0.108837801658735	0.815892009556851	-4.83391186324506
Q15170-2	TCEAL1	0.144184860486392	3.3510635493132	1.86957607175541	0.109546548622831	0.817198122281546	-4.83433162037997
Q01813	PFKP	-0.0561930881310509	3.32765816379441	-2.75469933322166	0.0322525980057645	0.68901867185418	-4.83572421756826
Q6P1J9	CDC73	-0.0489177315364115	3.29888264459867	-2.5078053331674	0.0450848178958319	0.754616969175221	-4.83871922876645
P61587	RND3	0.106194070292195	3.42338400092828	1.79407274833418	0.121749187021239	0.826466793981307	-4.83875216457426
Q562F6	SGOL2; SGO2	-0.157612945049016	3.24916364545633	-2.10068597480662	0.0792678060887608	0.800257563648142	-4.83875488038892
Q9NRF2-2	SH2B1	0.0663254082503355	3.32576285855495	2.08656863659877	0.0808478898354406	0.800257563648142	-4.83948911176168
Q9UBT6	POLK	0.0722204490792314	3.33492038704209	2.14532459563033	0.0744754692019445	0.800257563648142	-4.83965384554946
Q9NYA4	MTMR4	0.0851059098823477	3.34220259133601	2.28440924966008	0.0613612501043249	0.783561602826401	-4.84047394433959
O00716	E2F3	0.059600335007994	3.30873977632409	1.99522929453571	0.091871716266451	0.808487494800536	-4.84079731832631
Q9H175	CSRNP2	0.0738823164275715	3.36324831250977	1.85720249940071	0.111460270129689	0.81804545016262	-4.844938370805
Q9Y4C5-1	CHST2	0.0825953815219342	3.32286219000784	1.81864685160826	0.117637527418439	0.821796475561169	-4.8455955136349
Q6ZSZ5	ARHGEF18	0.0687920643592551	3.30709723156702	2.39816573745936	0.0524206147614444	0.77916608621583	-4.84988519545669
P23229-1	ITGA6	0.0964735334452969	3.33272110854767	1.61850119495895	0.155471743233648	0.836128786680491	-4.85182464426291
Q86Y39-2	NDUFA11	0.108842597525639	3.36589067900159	1.68508688951027	0.141738044294733	0.832891722183645	-4.85285341483775
O43639	NCK2	0.0598904972129783	3.33924810381075	2.22509109150869	0.0666365890006353	0.795839304749665	-4.85385059296186
Q53FP2	TMEM35; TMEM35A	0.09283572388826	3.32079442545531	1.79204325573435	0.122094988329603	0.827456862194641	-4.85716094729366
Q8WUU5	GATAD1	-0.0641666290003824	3.31844451668235	-1.94387335216302	0.0987226082140884	0.809378699915685	-4.860263022235
Q96A73-1	KIAA1191	0.0991555832099748	3.32972430977234	2.16545655810185	0.0724119372659208	0.798946025571133	-4.86233798395355
Q8NFY9	KBTBD8	0.105827624176003	3.33025928190481	1.69691716092127	0.13942312665368	0.831977927427241	-4.86233931599461
Q15131-1	CDK10	0.06480105342251	3.29276413367849	1.97477088555603	0.0945418094044649	0.808544042593152	-4.86313713690937
Q9Y4F5	CEP170B; KIAA0284	0.132434191090177	3.28036540420303	1.49716672262394	0.183804020279893	0.842176722648431	-4.86424175850124
Q96LW4	CCDC111; PRIMPOL	0.0856037643799638	3.31724358675828	2.05006838099681	0.0850830181937301	0.800328542096179	-4.866333196328
Q99550	MPHOSPH9	0.0820011168285031	3.32323645070799	2.27016471054437	0.0625873855591377	0.78930173376849	-4.86681835353798
Q96NB2	SFXN2	0.1390212164612	3.33152697320317	2.20893160951343	0.0681531976678178	0.797430500224524	-4.86855652468946
Q9NW68	BSDC1	0.0697004158160998	3.3212731004058	2.18345035005562	0.070617123992022	0.797430500224524	-4.8706029787701
Q6PH81-1	C16orf87	-0.0820166530847862	3.29600811725214	-1.63625484783464	0.151690363611835	0.832891722183645	-4.87062071717217
Q8N398-1	VWA5B2	0.0866134036164633	3.35638607777481	2.04024478450861	0.0862607597988332	0.805708062878273	-4.87310394342982
Q9BSJ5-1	C17orf80	0.125373244734163	3.33425992893027	2.0975043628141	0.0796211457492325	0.800257563648142	-4.87591112823869
Q96LW7-2	C9orf89; CARD19	0.0889148549047068	3.3309198283578	1.63403867942381	0.152157550926453	0.832891722183645	-4.87780301954383
O75027-2	ABCB7	0.162791458712394	3.34848794927695	2.16480101688418	0.0724782003228205	0.798946025571133	-4.87804362330967
Q9UHL0-1	DDX25	0.0900806064778634	3.32671848248401	1.82232424943301	0.117034086374863	0.82130239854684	-4.88083119294401
P52657	GTF2A2	0.187355952573183	3.31280906634415	1.62800505369357	0.153436460760777	0.832891722183645	-4.88162435262048
O14978	ZNF263	0.10538008268421	3.34082318830365	1.35918940422298	0.221810006748833	0.844697015986012	-4.88165920632754
Q96MU8-2	KREMEN1	-0.134526195714534	3.27177676256126	-1.01442690448241	0.348609919047894	0.860794837423064	-4.88207884468402
Q9Y3E7	CHMP3; RNF103-CHMP3	-0.0798104208411641	3.31959575324694	-2.18765763119648	0.070204081512527	0.797430500224524	-4.88262223225179
Q9H4H8	FAM83D	0.0633102419449279	3.33155138719439	2.29325676727407	0.0606122139392969	0.782141509903992	-4.88360513846876
Q6NUP7-1	PPP4R4	0.103556464982937	3.33381127738762	1.43588676547402	0.1998791717623	0.84405644574022	-4.88434181319318
P80303	NUCB2	0.114766352099179	3.31732982634191	2.40103827644708	0.0522132619744805	0.77916608621583	-4.88596692514684
Q9BSH4	TACO1	0.0722545547849222	3.34470190769875	2.13852134478677	0.0751863141120335	0.800257563648142	-4.88747062944073
O14880	MGST3	0.188360718944124	3.31172643900681	2.0679343334787	0.0829826355620784	0.800328542096179	-4.88754889379472
Q3SXM5	HSDL1	0.0829413164491175	3.34034871441147	2.11114632043454	0.0781173191957903	0.800257563648142	-4.88802106904631
P41567	EIF1	0.0645561747430166	3.33245748757939	2.23205702700838	0.0659935729306021	0.794974601083091	-4.88876144464104
O00567	NOP56	-0.0648120019069077	3.2806080299453	-2.64403395747495	0.0374456083219951	0.717578370050922	-4.89015758223191
P25391	LAMA1	0.0711805580006602	3.32700532656097	2.28782204030721	0.0610711924409155	0.783561602826401	-4.89115602516198
P00519-2	ABL1	0.0965387153495223	3.31747418798842	2.34191651109026	0.0566587114023006	0.77916608621583	-4.8920513070608
P53701	HCCS	0.0955148522091043	3.38563544692827	2.16505394019544	0.0724526271158506	0.798946025571133	-4.89292589893492
P25054-1	APC	0.06223106279453	3.32209112823683	2.5312004449602	0.0436640254312858	0.751279657916593	-4.89411138342612
Q8NCJ5	SPRYD3	-0.0624222861954101	3.36636460287954	-0.246480002860688	0.813331442985642	0.956278860245056	-4.89432218090023
P41134	ID1	0.115580722373373	3.36988442260946	1.46480704472149	0.192137600174516	0.843173051975301	-4.89511608265182
Q6ZSZ6	TSHZ1	0.10156040469657	3.31480492300143	1.44327334148383	0.197875078811156	0.843173051975301	-4.89610794040603
O60637	TSPAN3	0.127879111121675	3.28734806244939	1.55486342266096	0.169774658416377	0.837706900464479	-4.89970829746265
Q8IV63	VRK3	0.0791242254680496	3.33556870638638	1.78854491056634	0.122693324042161	0.827456862194641	-4.9019540055073
P31629	HIVEP2	0.0888985718284932	3.33754347506477	1.79604452382571	0.12141413908372	0.826466793981307	-4.905947047293
P48454-3	PPP3CC	0.0818043518254447	3.32168979166118	1.79303171198419	0.12192644717116	0.826996634352151	-4.90689936745043
Q9Y4E6-1	WDR7	0.0617734346210624	3.31582499143828	2.36155578206392	0.055139831556862	0.77916608621583	-4.9069996637205
Q6NUS6	TCTN3	0.092854364318282	3.32711009607974	1.64036417818108	0.150827704977302	0.832891722183645	-4.90807279291208
Q9NX55-2	HYPK	0.1296370239937	3.31126509098591	1.60177454498216	0.159116356500681	0.836564269909247	-4.90885042327035
Q9BSB4	C12orf44; ATG101	0.0825401713864379	3.34499875262051	1.90784174047363	0.103832025967728	0.811238297216427	-4.91080043609019
Q9NPQ8	RIC8A	0.0774646212416886	3.31410187465845	2.26482637520322	0.0630533969366381	0.790395664456865	-4.91143435795126
Q6P3W2	DNAJC24	0.0962113792861318	3.32867003153831	1.76239212087075	0.127258089487535	0.83071529676436	-4.91150029035419
Q969F1	GTF3C6	0.095830443522522	3.30467701068925	1.64958285192012	0.148909489328444	0.832891722183645	-4.91174998428686
Q9HC21	SLC25A19	0.203654635027078	3.34672206759634	1.98071238384449	0.0937584335446724	0.808487494800536	-4.91250500296995
Q9BQ69	MACROD1	0.0623256452719352	3.37068094662767	1.89690679158316	0.105434125330853	0.814194073591941	-4.91257156798472
Q9Y2Q3-1	GSTK1	0.0798956593947373	3.33956056716716	1.92443004333966	0.101447784819869	0.809378699915685	-4.91367584088425
Q9BWN1	PRR14	-0.122416168168611	3.27904119001404	-0.969675172510119	0.368780134247013	0.860794837423064	-4.91469534144497
Q16854	DGUOK	0.123636571098929	3.34524882689138	1.80135259946737	0.120516665279179	0.826466793981307	-4.91495434486227
Q86VZ4	LRP11	0.0980037862958305	3.28018718427172	1.821307327775	0.117200652503864	0.82130239854684	-4.91641720329087
Q53H12	AGK	0.156749672883073	3.35209757680433	2.38493988652174	0.0533864660526506	0.77916608621583	-4.91715514088238
Q9P2J9	PDP2	0.0940395902191548	3.41121853441271	1.52356930887178	0.177254689494584	0.841841449350234	-4.91775386536009
Q15937	ZNF79	-0.0893798203994053	3.25785152701062	-0.455089261358699	0.664668372423199	0.921035538835132	-4.9180571786431
P30305-1	CDC25B	0.0856432099816778	3.35697164254147	2.18636436978703	0.0703307807250229	0.797430500224524	-4.91841105860447
Q8IWV8	UBR2	0.0630262773267037	3.30654057961067	2.53207475994748	0.0436118511309458	0.751279657916593	-4.9191298360222
P24386-1	CHM	0.0714883629989301	3.29729362750976	2.12489307582536	0.076631186922157	0.800257563648142	-4.92015971570043
Q2TBE0	CWF19L2	0.0734763809944907	3.3308961233271	2.30632417466615	0.0595231972443094	0.780650065584285	-4.92130134123526
P11926	ODC1	0.0709192715381562	3.41040551417267	2.13033647827892	0.0760507076568886	0.800257563648142	-4.92222369599251
Q969Z4	RELT	0.122044801596984	3.3166472281269	1.3937170406475	0.211680269485523	0.844697015986012	-4.92248313474006
Q9UMS0	NFU1	0.107137700813627	3.39679549046512	1.87903834494867	0.10810507613188	0.815361488070325	-4.92303391299193
Q9UKU9	ANGPTL2	0.0983314089204744	3.32819745993595	1.5816457351321	0.163609782964556	0.837706900464479	-4.92775008301815
O60343-1	TBC1D4	0.0441699195486749	3.31905015245299	2.6298547625482	0.0381726788004798	0.722929597801969	-4.92793447202595
Q8WUX1-1	SLC38A5	0.117670345294068	3.32495903043383	1.20188300041265	0.273632410430966	0.853779374610611	-4.92825132678352
O75489	NDUFS3	0.101476438290294	3.34852525888284	2.11717334662005	0.0774621680019004	0.800257563648142	-4.93011524320559
Q6N075-2	MFSD5	-0.218198993456345	3.2889765359191	-1.30917657210451	0.237255666833889	0.844697015986012	-4.9312589472953
Q8TAD4-1	SLC30A5	0.0719183461562093	3.2983029040426	1.99796975223905	0.0915198532063026	0.808487494800536	-4.93273717809781
P36957	DLST	0.105215641246809	3.35685851564096	2.18820464762445	0.0701505614840497	0.797430500224524	-4.93287243005968
P42684-5	ABL2	0.0561355015913296	3.32262531756973	2.32265555986107	0.0581906196721318	0.77916608621583	-4.93511020630696
Q9UM47	NOTCH3	0.059232191032023	3.31521494026433	1.91013486794022	0.103499139663794	0.810111575809752	-4.93658199256356
Q9BXJ3	C1QTNF4	-0.084620124918561	3.35678080498979	-0.361547574974585	0.729786622272011	0.937296242105358	-4.93717014060769
Q9UQ84-1	EXO1	0.0562910741888106	3.34248132346197	2.35162853160385	0.0559022269358774	0.77916608621583	-4.93738340204877
Q9UP38	FZD1	0.10734612288698	3.3582521196292	1.32497486885351	0.23227597927377	0.844697015986012	-4.93875692559795
P51687	SUOX	0.0840429145296658	3.33336992432474	1.99051653372982	0.0924799988819887	0.808487494800536	-4.93964276567205
Q8NAF0	ZNF579	-0.0808061439127766	3.26105320470004	-1.92744642371402	0.101020139652404	0.809378699915685	-4.94060487270531
Q8NCC3	PLA2G15	0.0653481068213388	3.32205451141944	1.95141495071724	0.0976853720277923	0.809378699915685	-4.94296408647109
O95835	LATS1	0.0734936141196307	3.31671524195999	2.2725794685692	0.0623777591866546	0.789124382582136	-4.94442255245413
Q9NRG7-1	SDR39U1	0.113532590631145	3.36130240192422	1.29015846334675	0.243375743319373	0.844697015986012	-4.94516038904751
Q8WUB2	FAM216A	0.122066191632793	3.36345991689951	1.1483827269268	0.293504652070897	0.857848609265877	-4.94595479688374
Q96DP5	MTFMT	0.0968581530849421	3.33171698854435	1.55997877418312	0.16858052279124	0.837706900464479	-4.94690913364546
Q13227	GPS2	-0.0751291187314052	3.32083940049011	-2.12276418464709	0.0768594372622135	0.800257563648142	-4.94730071831573
Q9H0S4	DDX47	-0.0808604908442516	3.26468481628921	-2.38716285345737	0.0532228389231685	0.77916608621583	-4.94751847254419
O75575-1	CRCP	0.0899586119881128	3.32772671686143	1.76447820310087	0.126887974978067	0.83071529676436	-4.94881557154426
Q9P246-2	STIM2	0.0893761398560563	3.30947601059457	2.03583059627527	0.0867953263513302	0.805708062878273	-4.94908190010866
Q8N9Q2	SREK1IP1	-0.0897847600404875	3.30480441172539	-1.42076351800219	0.204040483412471	0.844697015986012	-4.94913010291553
Q9H1X3-3	DNAJC25-GNG10; DNAJC25	-0.129289252271616	3.36318221138349	-1.67694074382729	0.143353541039182	0.832891722183645	-4.94998678078552
Q96H78	SLC25A44	0.219710366322188	3.33499166986804	1.05350019528204	0.331728462627115	0.860794837423064	-4.95015884099196
O75323-1	GBAS; NIPSNAP2	0.132461558506357	3.36125858511972	1.83290776275915	0.115314335825872	0.82130239854684	-4.95783936875928
P46109	CRKL	0.0575676933629422	3.33569067121112	2.38574328412105	0.0533272694565936	0.77916608621583	-4.95789352531822
Q8TDN6	BRIX1	-0.14043518004197	3.20145224215663	-2.33100231701055	0.0575215494867864	0.77916608621583	-4.95903343395247
Q9BTV7	CABLES2	0.120736184903098	3.26417273510622	1.65080007284983	0.148657962295045	0.832891722183645	-4.95925615594701
P14621	ACYP2	0.110414797656466	3.30983980650319	1.44464326542031	0.197505431151243	0.843173051975301	-4.959946366924
O43513	MED7	0.106062279976039	3.31311087959685	1.57008624530101	0.166244239311099	0.837706900464479	-4.96087907176128
P45954	ACADSB	0.102108053273602	3.38871364421832	2.19346319934154	0.0696381961816411	0.797430500224524	-4.96115927718849
O75391	SPAG7	0.0981691773630574	3.30576282675981	2.21498524101456	0.0675809323274862	0.797430500224524	-4.96164733489414
Q15506	SPA17	0.0930431399360709	3.34785565633649	1.45552565209836	0.194591501810382	0.843173051975301	-4.96271342295068
Q9UBZ4	APEX2	0.0711312697967446	3.35505622777495	1.79538713013666	0.121525744180022	0.826466793981307	-4.96412367977058
Q969S8-1	HDAC10	-0.110540157000756	3.27200528110119	-0.831704298810498	0.436668980464149	0.869696789938134	-4.96430598387147
Q8NEY8-3	PPHLN1	0.100008367741977	3.29065745688864	1.82043945866648	0.11734298904382	0.82130239854684	-4.9655499871661
O60266	ADCY3	-0.115124776970155	3.29197749681198	-0.910235173905626	0.39696655267682	0.861744992997697	-4.96607736332548
Q9NZV5-1	SEPN1; SELENON	0.103800605457229	3.33578339127466	1.37575894732602	0.216895418286125	0.844697015986012	-4.96823095333228
Q8N8Y5	ZFP41	-0.116339712087022	3.2724011829584	-1.25105603161605	0.256397663396387	0.849130999380513	-4.96830753799036
Q9NVX2	NLE1	-0.0542544969959783	3.32823726645788	-2.19281083900551	0.0697015494630934	0.797430500224524	-4.97032643673712
Q5VUB5	FAM171A1	0.10042021912769	3.30914548358475	1.85018820013593	0.112559756638259	0.81804545016262	-4.97063437865421
Q92918	MAP4K1	0.126574870454624	3.28337007318523	0.785645711313155	0.461259991823398	0.876068191351071	-4.97083287124613
Q8IW70-1	TMEM151B	0.121130749791306	3.32400741125083	0.792803515051531	0.45737528166203	0.875358938032651	-4.97148795541427
O94972	TRIM37	0.0748958518400874	3.32075135280398	1.9786301277661	0.094032230979611	0.808487494800536	-4.97173111238856
Q12766-1	HMGXB3	0.076592193447332	3.32614701407944	1.61716442999368	0.155760070338396	0.836128786680491	-4.97419988681509
Q8N2A8	PLD6	0.150710187149723	3.37256472200013	1.68403773615767	0.14194511880669	0.832891722183645	-4.97434239920135
Q68D20	PMS2CL	0.0474015838810165	3.29268956271802	0.222365322753311	0.831230149777522	0.958108748023881	-4.97545366247399
O95164	UBL3	0.0828526804753946	3.3249621948967	1.66806050433191	0.145134792320061	0.832891722183645	-4.97565582688679
Q4L235-1	AASDH	0.117820415556774	3.32144721664878	1.46118904236704	0.193090748123058	0.843173051975301	-4.97616881433704
P11166	SLC2A1	-0.0767942550647665	3.32349152966839	-1.97949831109968	0.0939179754675369	0.808487494800536	-4.97929584638341
P18621-3	RPL17-C18ORF32; RPL17	-0.339437437114936	3.24460568712543	-2.6209264122033	0.0386381712170612	0.722929597801969	-4.97980234634173
Q8WTP8-1	AEN	-0.0740737323696962	3.32555127944453	-1.91941105016105	0.102163353065534	0.809378699915685	-4.98128134773961
O75449-1	KATNA1	0.0442912939816068	3.34709629885273	2.28519627009206	0.0612942339424993	0.783561602826401	-4.98215984416941
Q9UBX3-2	SLC25A10	0.123778013731306	3.35942803073869	2.06842579818324	0.0829256056417995	0.800328542096179	-4.98310155254517
Q9H6Y2	WDR55	0.0581238404360815	3.34147108001881	2.05695949669623	0.0842665698615494	0.800328542096179	-4.98334364248072
Q13530	SERINC3	0.10237297334267	3.31496191272066	1.61482303856221	0.156266312252388	0.836128786680491	-4.98550751970773
Q9BT17-1	MTG1	0.0841408359397024	3.40248578494531	1.95298859788932	0.0974703183200219	0.809378699915685	-4.98837614441999
Q14872	MTF1	0.10834909195023	3.3367040112505	1.06728661069756	0.325932660913152	0.859067866855967	-4.98972427895608
P36383	GJC1	0.135820099133195	3.2993211628459	1.65008604468646	0.148805460002993	0.832891722183645	-4.98986990034658
Q5TB30	DEPDC1	0.0955206134431477	3.28537069532968	1.25541415671069	0.254916713258844	0.849130999380513	-4.99262206289478
Q8WTV1	THAP3	-0.117812450390212	3.2607844357128	-0.94660634421485	0.379529375376603	0.860794837423064	-4.99536023123823
Q92536	SLC7A6	0.100308885085793	3.31625557020904	1.4479360177378	0.196619538955888	0.843173051975301	-4.9957270579248
Q9Y2R5	MRPS17	0.0975301758394173	3.37994179743216	1.82285590827145	0.116947096323875	0.82130239854684	-4.99661417230587
Q9Y3Y2-3	CHTOP	-0.207054908035251	3.21339724744186	-1.92214779771335	0.101772547791884	0.809378699915685	-4.99674015334142
Q13303-5	KCNAB2	0.142986591575322	3.29429885768255	1.97305202870968	0.0947696600468872	0.808544042593152	-5.00120097080645
O15488-1	GYG2	0.0755693600546617	3.29033061215328	1.65328063601263	0.148146636504462	0.832891722183645	-5.00171321836468
Q9UMY1-1	NOL7	-0.115865684722911	3.24295142424276	-1.93402944958506	0.100093071305311	0.809378699915685	-5.00223324683836
Q9BXK5-1	BCL2L13	0.112645790904891	3.33744020335966	2.16887051289727	0.0720678510577532	0.798946025571133	-5.00232742946737
Q96S15-2	WDR24	0.0490068987728342	3.32321083274888	2.22580321638447	0.0665705587030402	0.795839304749665	-5.00279757737625
O15213	WDR46	-0.0907416297409834	3.27640207670115	-2.2369728154792	0.0655436524051801	0.794145183792996	-5.0035558451903
Q9Y2B1	TMEM5	0.100475061464837	3.29303454616328	1.31740323031072	0.234650866813521	0.844697015986012	-5.00363547836176
Q5HYJ3-1	FAM76B	-0.0476228978225726	3.29748911467553	-2.12024409399113	0.0771305263892384	0.800257563648142	-5.0058265396607
Q9NRK6	ABCB10	0.136473073530415	3.35676646697012	2.11347362732285	0.0778636693853135	0.800257563648142	-5.00966634752127
O95429	BAG4	0.0457498170315695	3.35064529604123	2.08454695472345	0.0810767722266245	0.800257563648142	-5.00993817838512
Q16649	NFIL3	0.0955724204660865	3.35574600958492	1.48558758605583	0.18674672819161	0.842176722648431	-5.01118036280238
Q00325-1	SLC25A3	0.140082043264339	3.3482836306767	2.46760793083395	0.0476407539562722	0.771132669863078	-5.01184121723826
Q9NVV9-1	THAP1	0.0869801132637138	3.32128841373094	1.51507833798128	0.179336806091129	0.841841449350234	-5.01260211290553
P56182	RRP1	-0.122870177338154	3.25884454741803	-2.14519326418704	0.0744891263134891	0.800257563648142	-5.01545042525217
P80723	BASP1	-0.316801309932765	3.28161684235057	-2.30321242207119	0.0597806729806375	0.780650065584285	-5.01574254319911
Q15459	SF3A1	-0.0383608023425602	3.31686078608081	-2.78778991986065	0.0308533307786023	0.681335594662755	-5.01630775680085
Q96IG2-1	FBXL20	0.0605208319289872	3.33882445787776	1.93367193764226	0.100143199913013	0.809378699915685	-5.0163554484745
Q9NVS2-2	MRPS18A	0.0935342535747247	3.32461399035201	2.08533956251539	0.0809869597179727	0.800257563648142	-5.01668591381295
Q99666	RGPD6; RGPD5	0.0749194460220116	3.36315048852864	1.5555362794242	0.169617132338836	0.837706900464479	-5.01741146793315
O43309	ZSCAN12	-0.00981615694072854	3.31894628387607	-0.0508289131021697	0.961072507353245	0.987966968320157	-5.01782397207725
Q8N6G5-1	CSGALNACT2	0.100862248463748	3.30761818075756	1.35981082091874	0.221623896647321	0.844697015986012	-5.01811263030865
Q99487	PAFAH2	0.0802999428068817	3.3037730217756	1.67778652173965	0.143184990392512	0.832891722183645	-5.01902802856648
Q9NSG2-1	C1orf112	0.0941844105183591	3.32134837483736	1.87507764137157	0.108706144307161	0.815892009556851	-5.02214584273296
Q9NZJ7	MTCH1	0.106139777208936	3.34113202981102	2.11764742161406	0.07741087306252	0.800257563648142	-5.02330114503021
Q8N5S9	CAMKK1	0.0713644978610923	3.32598740510597	1.96872758397	0.095345344753967	0.808544042593152	-5.02443759453927
Q9BTP7	C19orf40; FAAP24	0.106075595013839	3.3913527275077	1.02753999101145	0.342869105933231	0.860794837423064	-5.02477876625796
P10070-5	GLI2	0.074180272289735	3.31719189956678	2.03832971997475	0.0864922679358953	0.805708062878273	-5.02481616247153
Q5VWQ0	RSBN1	-0.0595318656439869	3.30606843670928	-2.27426064130978	0.0622322443738902	0.789124382582136	-5.0250195651893
P29375-1	KDM5A	-0.0501092172552343	3.30552444559431	-2.51524357641625	0.0446278854088914	0.754616969175221	-5.02601456047155
Q8NEZ2	VPS37A	-0.0642287785848244	3.35604225044353	-2.00186550000542	0.0910219880189672	0.808487494800536	-5.02638262568184
Q969M1	TOMM40L	0.128764693369765	3.32825311433795	1.65658332361124	0.147468458307878	0.832891722183645	-5.02887324037252
Q8TEH3	DENND1A	0.0588018127219022	3.29569609720239	2.00570889884091	0.0905334839311921	0.808487494800536	-5.02969046315241
Q13084	MRPL28	0.0868186618722934	3.37997776155271	1.88086705889684	0.107828667128422	0.815361488070325	-5.03013638141377
Q12800-4	TFCP2	0.0421819599800067	3.33845239665171	2.18178321762242	0.0707814805228349	0.797430500224524	-5.03025028450789
Q86XJ1	GAS2L3	-0.0773376924400733	3.31840079948406	-0.432697734109412	0.679996035227662	0.927366835651526	-5.03293661169526
Q9NP74-1	PALMD	0.0979703484848938	3.33864406722106	1.82516250441818	0.116570427042589	0.82130239854684	-5.03403814771668
Q9C0I4	THSD7B	-0.119452061219937	3.30384022913275	-0.761652867815287	0.474450114601614	0.876454797415721	-5.03431635374005
Q9ULI2-1	RIMKLB	0.0817023335476637	3.39742844352695	1.54297074274812	0.172581712292598	0.840818909217474	-5.03602129012499
P02458-2	COL2A1	0.079236372478089	3.31820076498371	1.78053696291803	0.124073778589177	0.829373171398803	-5.03662922271289
Q01082-3	SPTBN1	0.113388132643714	3.28586022576809	1.58571314227209	0.162692224480279	0.837706900464479	-5.03720075425652
Q14145	KEAP1	0.0487020302364704	3.33619576609335	2.32899537738548	0.0576816914275232	0.77916608621583	-5.03992796116222
Q6P087	RPUSD3	0.0736255611596128	3.35571331311352	1.94629057057063	0.0983889616298476	0.809378699915685	-5.04412126061976
Q8WV93	LACE1; AFG1L	0.0754575214098544	3.33621037877857	1.80110985213333	0.1205575659783	0.826466793981307	-5.04514185405297
Q9H2T7	RANBP17	0.0970468379117803	3.30268277037514	1.32489602361586	0.232300598788149	0.844697015986012	-5.04718142249555
Q5U3C3	TMEM164	0.120430671205136	3.27882960495159	1.24635752145005	0.258002685468412	0.849130999380513	-5.04843551007301
Q9BTN0	LRFN3	-0.144933380279152	3.3210156248548	-1.1296927104374	0.300728822634722	0.858059114626327	-5.04946642635769
P36542-1	ATP5C1	0.0748251028303168	3.36826406527078	2.36265464673864	0.0550561086096361	0.77916608621583	-5.05010644170675
Q92979	EMG1	-0.0479428101614403	3.31154156900497	-2.19545617076482	0.0694450167677403	0.797430500224524	-5.05210205897854
Q9H9J2	MRPL44	0.0882831153604628	3.35174695918541	2.07695817855643	0.0819418128038163	0.800328542096179	-5.0527694031966
Q5SGD2-1	PPM1L	0.0556480365286802	3.32648974577302	1.86366151551517	0.11045721565277	0.817198122281546	-5.05319721997326
Q8N5I4	DHRSX	0.101973311398237	3.31231961729516	0.984422159629581	0.36203426779301	0.860794837423064	-5.05379174502516
Q9H869-9	YY1AP1	-0.1122433074749	3.33836763713092	-1.40575356418024	0.208248736127048	0.844697015986012	-5.0539348357672
Q8N2Y8	RUSC2	0.0745392585514024	3.33840457850419	2.01749564642331	0.0890517673055543	0.808487494800536	-5.05404004734219
Q9H257-1	CARD9	0.0777183842984324	3.30458498255995	2.01378691643073	0.0895153394454667	0.808487494800536	-5.05582896354431
Q9Y3M8-1	STARD13	0.111363413345389	3.29355208941076	1.05549982141287	0.330882654059383	0.860794837423064	-5.05636216402698
Q16540	MRPL23	0.13957008520624	3.34325746299416	1.54948609489397	0.171038525022858	0.837706900464479	-5.05706652678446
P62318	SNRPD3	-0.0917334867289135	3.32080990051012	-2.13093275002165	0.075987394995057	0.800257563648142	-5.0578085845246
Q9UJA3-4	MCM8	0.0427472704613715	3.32862716351536	2.17783970500239	0.0711718200776207	0.797430500224524	-5.05815088832768
Q6ZNA4-3	RNF111	0.0734464586608042	3.33571023477564	1.61634649428051	0.155936741964286	0.836128786680491	-5.05900992564753
O60333-3	KIF1B	0.0906952854852958	3.35384762694527	2.08881540890038	0.0805942939948759	0.800257563648142	-5.05905062827157
Q96CQ1	SLC25A36	0.0992165613634058	3.32947586414085	1.36787487144755	0.219221485505606	0.844697015986012	-5.05945287523907
P56524	HDAC4	0.0647585150353232	3.30858542797602	1.99148526842415	0.0923546332164834	0.808487494800536	-5.06107728054183
Q8WVN8-1	UBE2Q2	0.0862948407358165	3.33523586845986	1.51567024512946	0.179190924231403	0.841841449350234	-5.06441041697821
Q8N9N8	EIF1AD	0.0715507035871236	3.34173341668074	1.97681305886573	0.0942718144129224	0.808487494800536	-5.0650159273655
P22695	UQCRC2	0.0946625785850006	3.35620187962005	2.39660263646782	0.0525338074952214	0.77916608621583	-5.06718545238635
Q86UW9	DTX2	-0.408279812423465	3.30165997822439	-1.31335554643996	0.235929288453496	0.844697015986012	-5.06738312794847
P53602	MVD	0.0623795438876128	3.31476310784149	1.92467954823785	0.101412343053322	0.809378699915685	-5.0682231480079
P62266	RPS23	-0.572784497793114	3.21673698827903	-2.16002108390615	0.0729632429425119	0.798946025571133	-5.06823444699874
P50336	PPOX	0.106850075481105	3.37213523934691	1.84431976661629	0.11348785345637	0.819165892389037	-5.06926952305913
P35625	TIMP3	0.0984713140169971	3.32271536374593	1.32959479796907	0.230837457637966	0.844697015986012	-5.06984943385589
C9JH25-1	PRRT4	0.0922248493948452	3.31666359383173	1.2265140358926	0.264878081248467	0.851528862731514	-5.06996681823771
Q8TBP6	SLC25A40	0.146859837017081	3.34932419190822	1.88250433244341	0.107581788876703	0.815361488070325	-5.07130692279914
Q9H936	SLC25A22	0.180420206913447	3.35132547655964	2.02072736535633	0.0886497928908628	0.808487494800536	-5.07174058275178
Q96GZ6	SLC41A3	-0.102248681832751	3.33070436965566	-0.724927318406151	0.495140213614609	0.881601630680916	-5.0729964497474
Q96B54	ZNF428	0.0807815994426058	3.31191527224109	1.43276120363817	0.200732776502033	0.844697015986012	-5.07363285628393
P24539	ATP5F1	0.130403501328507	3.34867481527859	2.34909229445582	0.0560987592750473	0.77916608621583	-5.07676574771731
A6NDB9	PALM3	0.097228710089935	3.29831044789628	1.32736485198852	0.231530807566558	0.844697015986012	-5.07798604671416
Q9H825-1	METTL8	0.0717137022838505	3.32910298716584	1.7132753257908	0.136282241425594	0.831977927427241	-5.07864498339536
Q5U5Q3	MEX3C	0.0795109283134696	3.30497023235724	1.61107792127041	0.157079315086512	0.836128786680491	-5.07880150004149
Q13686	ALKBH1	0.0706853641358674	3.35085505430076	1.67647375009973	0.143446687532633	0.832891722183645	-5.07897658621323
Q96BD8	SKA1	0.0714252027921311	3.35083303793495	2.11243739777869	0.0779765027869117	0.800257563648142	-5.08015939806998
Q8NB14	USP38	0.0646369351856831	3.31431833956634	2.00942450235209	0.0900637325035344	0.808487494800536	-5.08078097813001
Q9Y2G7	ZFP30	0.0449503442622141	3.3567262803745	0.274936017550384	0.792368264974069	0.950056204455666	-5.08173164611578
P23786	CPT2	0.127508113806031	3.35378172305408	2.3762317567252	0.0540325204042626	0.77916608621583	-5.08261149526344
Q8N568-3	DCLK2	0.0588733776845558	3.31228095908064	2.1824482812611	0.0707158673359168	0.797430500224524	-5.08384532371263
Q8NDX6	ZNF740	-0.102257270689076	3.33376241990132	-1.70461212437504	0.137937022335632	0.831977927427241	-5.08421021317697
Q8WUF5	PPP1R13L	-0.130865257050705	3.30830433779532	-0.484664764962383	0.644691730544045	0.91630865572296	-5.08558182836237
Q9H857-2	NT5DC2	0.153312800276106	3.3064304452928	2.32982809250794	0.0576151895392585	0.77916608621583	-5.08576913420492
Q9NRF9	POLE3	0.0617388089566909	3.31022241616062	1.81191008494021	0.118750938718376	0.822330490088492	-5.09522829830382
Q9UK28	TMEM59L	0.0920621067453087	3.26098864538418	0.960110893839921	0.373207580420734	0.860794837423064	-5.09696601242405
Q86UU1-1	PHLDB1	0.0471217747489426	3.31465812850914	2.08645232096249	0.0808610405658684	0.800257563648142	-5.09751248128932
Q9Y644	RFNG	0.098781585380751	3.30327306046164	0.96489897662113	0.370985948968883	0.860794837423064	-5.09979181714092
P21802-11	FGFR2	-0.0856447621353655	3.34243075511916	-0.697551195944782	0.510952872877062	0.882302947037524	-5.10117853933046
P19404	NDUFV2	0.108037211033296	3.36722760087739	2.13367412506281	0.0756970047089643	0.800257563648142	-5.10166879323898
Q08999	RBL2	0.10230577332584	3.29563132066542	0.973901650598442	0.366836770417611	0.860794837423064	-5.1020122318015
Q13423	NNT	0.148535428000636	3.35072742159028	2.58054702336987	0.0408197681519748	0.73493215402778	-5.10254591125506
Q96S59-1	RANBP9	0.0489354606450368	3.33383415510123	2.09848500229261	0.0795120686116106	0.800257563648142	-5.10362992927744
Q8NBE8	PHOSPHO2-KLHL23; KLHL23	0.0802585097756044	3.40640703372292	1.52781022843991	0.176223229598567	0.841841449350234	-5.10382349672945
P54725-1	RAD23A	0.0537418770996447	3.32232953428598	2.09324610631969	0.080096561898824	0.800257563648142	-5.10599980120328
Q9Y297	BTRC	0.105407418405055	3.34109166975865	1.1143518845716	0.306769243436376	0.858059114626327	-5.10600455899846
Q15468-2	STIL	0.0636856163522732	3.35307453998355	1.83318061832271	0.115270329259664	0.82130239854684	-5.10653112155001
P82930	MRPS34	0.0665912645410984	3.3750537706265	2.078897313238	0.0817198846774618	0.800328542096179	-5.10720655976908
Q9Y2I7-1	PIKFYVE	0.0585116265357008	3.31820970233451	2.39027472234374	0.052994660308707	0.77916608621583	-5.10811265282593
Q9Y259-1	CHKB	0.0845912548773631	3.3003819296514	1.83674786845406	0.114696517793755	0.82130239854684	-5.10840533132377
Q6ZWB6	KCTD8	0.0600014716565339	3.32276702077163	1.86590980893229	0.110110165497737	0.817198122281546	-5.10922330123762
Q8N5Z5-1	KCTD17	0.069540916554349	3.32433716370385	1.60008847483565	0.159488208466995	0.836564269909247	-5.10986691254193
Q9NPB6-1	PARD6A	0.0181713658947995	3.33880303880601	0.111747772954921	0.914581362477381	0.980068162695905	-5.11041862595907
Q8ND82	ZNF280C	-0.0687256856704408	3.28231478993746	-2.1324368801498	0.0758279239704672	0.800257563648142	-5.1129047637394
Q9UBK8-1	MTRR	0.0561454931542826	3.33267667179437	1.99885279544994	0.0914067632519411	0.808487494800536	-5.11332920555468
Q9BPW8	NIPSNAP1	0.167762315655518	3.34661697373951	2.01998421349338	0.0887420668529383	0.808487494800536	-5.11503235300621
Q6GPH6-2	ITPRIPL1	0.0748569315773567	3.32687405432814	1.6570276201223	0.147377453242102	0.832891722183645	-5.1162750814207
Q9P270	SLAIN2	0.0579103053998436	3.31910138076514	2.09242040340774	0.0801890816249483	0.800257563648142	-5.11636423229314
Q9HAT8	PELI2	0.053985791233786	3.34970217600343	1.8779859555122	0.108264462476083	0.815361488070325	-5.11790547374447
Q86V21-1	AACS	0.077828808507676	3.30146769263851	2.35089675057095	0.0559588588220008	0.77916608621583	-5.11828435488483
Q14201-2	BTG3	0.0689226815094096	3.38951681232936	1.51327137926571	0.1797828361278	0.841841449350234	-5.11899352342104
Q03164-3	KMT2A; MLL	-0.064030563997165	3.2726310996873	-2.12881968487033	0.0762120048284046	0.800257563648142	-5.11992043898502
Q16762	TST	0.0904247761275186	3.35455237146494	1.7024724132017	0.138348715484177	0.831977927427241	-5.12194036875206
Q5TBA9	FRY	-0.057249931872465	3.29357991280101	-0.357637843645919	0.732567642649934	0.937360464496414	-5.12201299726576
Q9NRC8	SIRT7	-0.0940511649480103	3.2305888058662	-1.14575200458164	0.294512575587217	0.858059114626327	-5.12211111550006
O95670-1	ATP6V1G2	0.0673619961941428	3.29630040027904	1.52404812608	0.177137951412599	0.841841449350234	-5.12278215107111
O75600-2	GCAT	0.069777397503952	3.34377933537413	0.481751585023683	0.64664551344692	0.917085418566443	-5.1235316728355
Q9UNH5-2	CDC14A	0.0818853417597738	3.30186302993399	1.36519330480626	0.220017751160853	0.844697015986012	-5.12399473056999
P61296	HAND2	-0.0573280990503239	3.3393690932336	-1.86139627262696	0.110807976567901	0.81804545016262	-5.12416910293814
Q96FT9	IFT43	0.0954386477043517	3.31490769156496	1.73466238114318	0.132278926749178	0.831977927427241	-5.1248014482381
O94779	CNTN5	0.0904765917243988	3.26094356494566	0.672270708387219	0.525847057283995	0.885368828422416	-5.12480482900915
Q14689	DIP2A	0.0543615994130914	3.30646859375105	2.24184758781887	0.0651006069474641	0.794145183792996	-5.12579079530295
O75676	RPS6KA4	-0.135514354347453	3.32388496848827	-0.858257393719619	0.422930291523236	0.868789282931912	-5.12859292330516
Q9H0F7-2	ARL6	0.114502295710359	3.32707279539052	1.72386793507923	0.134285013396059	0.831977927427241	-5.12950104944033
Q4FZB7-1	SUV420H1; KMT5B	-0.101350302659165	3.29999473567869	-1.76649274921988	0.126531549152997	0.83071529676436	-5.1296962838117
Q99784	OLFM1	0.0909924402282157	3.31845111317676	1.15831842586485	0.289724154346447	0.854601857528813	-5.13142524274843
Q92565	RAPGEF5	0.0868375472302103	3.31037008771601	1.20577650454268	0.272232219719354	0.853779374610611	-5.13267024718764
Q14692	BMS1	-0.124645985436582	3.25526051303167	-2.27202719936326	0.0624256378611768	0.789124382582136	-5.1328626233313
Q9UJT1	TUBD1	0.066483728379248	3.36304215210894	1.60008536290551	0.159488895545007	0.836564269909247	-5.13360143556834
Q6P1S2-1	C3orf33	0.085017521361551	3.32254281697364	0.704550576768318	0.506878536992349	0.882302947037524	-5.13463515355479
Q13443	ADAM9	0.0821068915391265	3.31313497921971	2.04929297355048	0.0851753869263531	0.800328542096179	-5.13553364564368
Q96BK5	PINX1	-0.131721756045646	3.24190090412625	-1.91829709336016	0.102322853110673	0.809378699915685	-5.13808821261812
O75817	POP7	0.107566315500644	3.32427057922705	1.65699071722931	0.147385009995576	0.832891722183645	-5.13954247624836
O00488	ZNF593	-0.0757614397022559	3.28474477993329	-1.48374230085713	0.187219704770362	0.842176722648431	-5.14143921228265
Q15031	LARS2	0.163960110298562	3.33097964307485	2.12363770104288	0.0767656989339414	0.800257563648142	-5.14144000708118
O95967	EFEMP2	-0.0817485274331624	3.22757933669875	-0.714458614603281	0.501147945115259	0.882302947037524	-5.1417353014555
Q4VC05	BCL7A	0.0936081429411984	3.28818000663064	1.33699197926706	0.22855073284149	0.844697015986012	-5.14179145662869
Q16635-1	TAZ	0.101380291755298	3.32642858592406	1.17260962184867	0.284358766602645	0.854601857528813	-5.14242179794697
P50440-1	GATM	0.117687471946111	3.38056209013412	1.36027938445494	0.221483657962189	0.844697015986012	-5.14270446733553
P10301	RRAS	0.116013249475244	3.30937740746734	1.01990554733297	0.346202115752711	0.860794837423064	-5.14349348536236
Q8N5C8	TAB3	0.103573151957516	3.29317900504591	1.51617733423588	0.179066034760623	0.841841449350234	-5.14415272339609
Q9Y6K8	AK5	0.0599225280973753	3.34845992966577	2.06331298994693	0.083520848007856	0.800328542096179	-5.14422280040518
A8K8P3	SFI1	-0.0780297165221431	3.26688901571769	-1.39005500788301	0.212734432754761	0.844697015986012	-5.14487966138908
Q8NI35	INADL; PATJ	0.0845779872801089	3.32805339791571	1.31591805118696	0.235119229011945	0.844697015986012	-5.14760279772123
Q6P4A7-1	SFXN4	0.110306548644639	3.31677381305779	1.50584963718477	0.181625690062013	0.841841449350234	-5.14850476408672
Q70EL1-1	USP54	0.0656745041567213	3.32769582625497	2.03651743154714	0.0867119299159711	0.805708062878273	-5.14888871573917
Q93063-3	EXT2	0.0852288202483881	3.31274391989385	1.87720907891297	0.108382271309207	0.815361488070325	-5.1500848254468
Q96AT1	KIAA1143	0.0801854089586275	3.31491739919436	1.9948485590746	0.0919207085998978	0.808487494800536	-5.15167550565156
Q9NYK6-1	C21orf91	0.0871102825859911	3.36898525964278	1.5283349372509	0.176096002918563	0.841841449350234	-5.15180963346875
Q3SXZ3-1	ZNF718	-0.0955093770327023	3.28376510998345	-0.938004219994812	0.383599251346298	0.860794837423064	-5.15303433208377
Q13395	TARBP1	0.0693916996002486	3.30622057766223	1.81167938306618	0.118789250501943	0.822330490088492	-5.15316022266778
Q8WV99	ZFAND2B	0.0752361966077571	3.30854620701328	1.49259344410532	0.18496108562322	0.842176722648431	-5.1533878059935
Q96JS3	PGBD1	0.0661560984324534	3.33421663329983	1.62951920646145	0.153114554763176	0.832891722183645	-5.15422347046423
P29762	CRABP1	-0.0513334957746203	3.36005328266902	-1.87930453360915	0.108064798235147	0.815361488070325	-5.1548667947467
Q66K64	DCAF15	0.0550623348358881	3.29829637330226	2.01188608741273	0.0897538752338733	0.808487494800536	-5.15492322476839
Q9NQH7-1	XPNPEP3	0.0699067376565785	3.38490350431894	1.95901023028942	0.0966517720895543	0.809378699915685	-5.15801761135039
Q96AA3	RFT1	0.139452959595618	3.3005902334024	1.15897152118914	0.289477102869143	0.854601857528813	-5.16020280036376
P0CG35	TMSB15A; LOC101060235; TMSB15B	-0.202561744263145	3.31913738680793	-1.51272544973556	0.179917796870093	0.841841449350234	-5.16103793267548
O95271	TNKS	0.0722265385969423	3.32341798213981	2.0644603637405	0.083386892916197	0.800328542096179	-5.1613044793482
Q9C0I3	CCSER1; FAM190A	0.151302420318791	3.26420784353296	1.44692978568759	0.196889870453442	0.843173051975301	-5.16137272905967
Q9H8H2	DDX31	-0.142161151121971	3.23567360233185	-2.1644286404333	0.0725158683172488	0.798946025571133	-5.16222163583276
O75496	GMNN	0.0826420252115017	3.33837995441137	1.98892994160378	0.0926856921455499	0.808487494800536	-5.16334600913804
Q9BPX7-2	C7orf25	0.0689967928228032	3.33950393280688	1.7280839862641	0.133497996367668	0.831977927427241	-5.16690064503926
Q15058	KIF14	0.0415132449046895	3.33743652711019	2.42877714797761	0.0502544956723338	0.77916608621583	-5.16724225545082
Q7Z6L0-2	PRRT2	-0.0450364084992023	3.29588421999654	-0.292432336267383	0.779570938516148	0.949592628926678	-5.16762203185864
P17661	DES	0.0665672764268659	3.30125041114853	1.68917855256409	0.14093323769618	0.831977927427241	-5.16762859303925
Q96JI7-1	SPG11	0.0614310490909192	3.32307036286122	2.17671773693524	0.0712832782237285	0.797607258084565	-5.16808206192725
O00444	PLK4	0.091879880652378	3.33527532405045	1.12586213557807	0.302227711038903	0.858059114626327	-5.16905309550146
Q9H765	ASB8	0.0457951305055141	3.4026856165299	0.250449374278653	0.810396653137313	0.956278860245056	-5.16912766370338
O75920-1	SERF1A; SERF1B	0.111475566390472	3.29650007079625	0.943010400721687	0.381226627848083	0.860794837423064	-5.16929059227723
Q8IUR5-5	TMTC1	0.102779060470518	3.31751573089508	1.07241456047898	0.323798088848643	0.858839347733393	-5.16946855054635
O43676	NDUFB3	0.101639805608842	3.34075212326643	1.42975382575824	0.201557256125386	0.844697015986012	-5.1711060897339
O00560-1	SDCBP	0.0687168465365439	3.33132450737359	2.02811694056551	0.0877375110253471	0.808390347610093	-5.17143561503242
Q8WXA9-2	SREK1	0.0396985387165603	3.32255720134496	2.23930459234058	0.0653313415497188	0.794145183792996	-5.17200621176108
Q96JX3-1	SERAC1	0.0247259606721101	3.35694501904227	0.176455464724072	0.865603439491369	0.967884745781155	-5.17206605232795
O95478	NSA2	-0.171152726881182	3.27600027675247	-1.92385049419584	0.101530156506861	0.809378699915685	-5.17223612551151
Q8TB45	DEPTOR	0.086890875616533	3.32130175976847	1.17729233689001	0.282619189635998	0.854601857528813	-5.17309103703276
Q9NUM4	TMEM106B	0.0995340498699862	3.30513621206982	1.6791779198906	0.142908120676097	0.832891722183645	-5.1733031927925
Q6P161	MRPL54	0.0991012873984967	3.34700490545226	1.57961521380825	0.164069673475782	0.837706900464479	-5.17465701973534
Q6ZTU2-6		-0.0827968439071445	3.34339700668538	-1.32848397100875	0.231182611552741	0.844697015986012	-5.17479345413106
Q8WV60	PTCD2	0.148022999588921	3.3363089929599	1.56960436697739	0.166354926220978	0.837706900464479	-5.17528993502415
Q9H0R1	AP5M1	0.119150110781883	3.31991247709044	1.76451834001085	0.126880864157165	0.83071529676436	-5.17606227897565
Q9UPW6	SATB2	0.060162358036209	3.32695173806108	1.84918092204049	0.112718523968264	0.818485728048302	-5.17663170976278
Q86V20-2	FAM35A	0.0953060984018578	3.35753872208365	1.13476646868855	0.298753073644493	0.858059114626327	-5.17669272243504
O75954	TSPAN9	0.0913724129959617	3.33129640037559	0.965805999155756	0.370566263080822	0.860794837423064	-5.17750003872869
O75306-1	NDUFS2	0.108228330705739	3.35746391348224	2.22002332775039	0.0671084380039178	0.797430500224524	-5.17867574761169
Q96EQ0	SGTB	0.065625170001673	3.32845237860214	1.92666172979806	0.101131215736875	0.809378699915685	-5.17974323738404
P51161-2	FABP6	0.0623462005589733	3.33965804599752	1.99307675032107	0.0921490474971512	0.808487494800536	-5.18179093002374
Q9UPV9	TRAK1	0.137745404987014	3.29143576193729	1.35177296122557	0.224042053141582	0.844697015986012	-5.18228188987162
P35080-2	PFN2	0.0548299784329867	3.34545603960437	1.93443244768295	0.10003659488172	0.809378699915685	-5.18228232556108
Q9HC96	CAPN10	0.0052892644234859	3.41072856623702	0.0321596485012042	0.97536303424275	0.991941443501493	-5.18411936686821
P30049	ATP5D	0.0992480468842514	3.37463930955732	1.37603830554824	0.216813408575272	0.844697015986012	-5.18450519007635
O00634	NTN3	-0.127219813340478	3.24744549958611	-1.08023570364557	0.32056451473766	0.85858695849907	-5.18524724120234
Q13642	FHL1	-0.0855520964224993	3.27276027483385	-1.55142825030661	0.170581031358353	0.837706900464479	-5.185754027087
Q8IZP0	ABI1	0.0854885360968392	3.31144755076935	1.70322064668088	0.138204616120193	0.831977927427241	-5.18707983733509
O15527-4	OGG1	0.0297863320810526	3.37092864168759	0.204580746753878	0.844502207735757	0.961497951604976	-5.18855142916145
Q9ULI3	HEG1	0.0875617148572621	3.33637752244282	1.25125109217033	0.256331218962424	0.849130999380513	-5.18924240086577
Q7Z5G4-1	GOLGA7	0.071169827915109	3.31613920344619	1.60986323580265	0.157343865824177	0.836128786680491	-5.19001782727137
Q9Y305-1	ACOT9	0.077844373663081	3.34687985863922	2.08763232242678	0.0807277294731355	0.800257563648142	-5.19024772971648
A4D1U4	KIAA1147	0.108034807106933	3.31697483248231	1.74760752928216	0.129911501357145	0.831977927427241	-5.19047363199237
P43155	CRAT	0.133433284335474	3.33589771207407	2.05669220473436	0.0842980898445061	0.800328542096179	-5.19060797873561
Q9Y276	BCS1L	0.174586731970158	3.31912565926616	1.99458794001942	0.0919542597234436	0.808487494800536	-5.19072968397284
Q9NUS5	AP5S1	0.0726377216256131	3.34217111291859	1.4417839935075	0.198277671531176	0.843173051975301	-5.19171830842098
P62995	TRA2B	0.0625789771389885	3.30556583701999	2.17798802068698	0.0711570995275685	0.797430500224524	-5.19287313097106
Q02750	MAP2K1	0.0501963829100603	3.33671665166099	2.15463688172642	0.0735135832828532	0.798946025571133	-5.19355081283274
Q5JPI3	C3orf38	0.0997468457144298	3.3243421789792	1.66570629180078	0.145610568539929	0.832891722183645	-5.19376142816533
Q5TF39	KIAA1919; MFSD4B	0.134392913853394	3.29486822386213	1.37295405586529	0.21772038981216	0.844697015986012	-5.1945273943765
Q5H9E4	SLC25A53	0.0950312200226507	3.34011883105406	1.28999156315253	0.243430064423683	0.844697015986012	-5.19509322180591
Q96GM5	SMARCD1	-0.0422038616834685	3.3250863676691	-2.36396789888229	0.0549562250027185	0.77916608621583	-5.19527387900637
Q9NX38	FAM206A	0.0586760632912296	3.35014556611999	1.56738785803781	0.166864951638039	0.837706900464479	-5.19573302489458
Q6P1R3-1	MSANTD2	0.0829423258270363	3.29321257959509	1.69058427558234	0.140657757828495	0.831977927427241	-5.19731672524439
Q68DI1	ZNF776	0.0796785436371195	3.35338168704168	1.17106190562784	0.284935725740767	0.854601857528813	-5.19871226444706
Q13769	THOC5	-0.0535024508635598	3.30355253740818	-2.34387385727138	0.0565053985776558	0.77916608621583	-5.19924704176098
Q9NY12-1	GAR1	-0.164062605115616	3.20376805483322	-1.77020529827247	0.12587725970401	0.83071529676436	-5.19950148322414
Q96KP1	EXOC2	0.0580911741748633	3.31996527684522	2.18441081717217	0.0705226127703345	0.797430500224524	-5.19989259027721
Q9BUT9-1	FAM195A; MCRIP2	-0.0586616378843924	3.39701829159941	-0.385253198294392	0.713021788674142	0.933259902142452	-5.20079614063816
Q8WUA8	TSKU	0.0192070431904309	3.36183923199174	0.134284111357409	0.897464654826014	0.975647543378932	-5.20237604279144
O15382	BCAT2	0.0635254152916083	3.34127814096268	1.80776633658583	0.119440927320086	0.822859148876231	-5.20333864038097
Q8TDC3-2	BRSK1	0.0991128615655157	3.29189853816278	0.990983096039061	0.359064436063822	0.860794837423064	-5.20356938199579
Q9C0D2-3	KIAA1731; CEP295	0.0885566103146338	3.31690700895926	2.07273494459885	0.0824272678881527	0.800328542096179	-5.20515843909157
Q8IVF2-1	AHNAK2	0.0690358856667501	3.30133324426387	0.562009996340532	0.593983783125317	0.899701383623431	-5.20577328082361
P62910	RPL32	-0.291729293084157	3.22708391206559	-2.58293022439851	0.0406874568968585	0.73493215402778	-5.20626563465739
Q8TC05	MDM1	0.119495624642049	3.27631545181432	1.24935887641255	0.256976408143209	0.849130999380513	-5.20739308309295
P36551	CPOX	0.0716366954247717	3.35813987766932	2.0866971066714	0.0808333674404536	0.800257563648142	-5.20806885277879
Q8TC44-1	POC1B	-0.0946626360016607	3.31579539374072	-1.2046712843939	0.2726290539491	0.853779374610611	-5.2082259286477
Q9C0C4	SEMA4C	0.0779134545423756	3.31821524825277	2.08506196968922	0.0810184030007854	0.800257563648142	-5.20939040837961
Q99470	SDF2	0.0712219578025589	3.32175138840182	1.60174626304182	0.159122587110974	0.836564269909247	-5.21008497717949
Q7L4I2-1	RSRC2	0.0823338007980145	3.32506316288147	1.91191132591525	0.103241987085634	0.810046487182428	-5.21010637224655
Q9Y2H1	STK38L	0.0739593143849824	3.32110903675426	2.04371148997523	0.0858432690356045	0.804937559820921	-5.21023593018454
Q86XI8	C19orf68	0.0847876690828104	3.30632365364858	0.887986656051279	0.407929401626422	0.864295639524382	-5.21025365715212
O43861-1	ATP9B	0.0738661907302089	3.31917593047997	1.21251819099496	0.269822335771661	0.853779374610611	-5.21201650236001
Q9UPZ3	HPS5	0.0437543229752586	3.32434490150319	2.0227494026949	0.0883992148123188	0.808487494800536	-5.21231933930739
Q9H3R0	KDM4C	-0.0707604703367576	3.28602855247306	-1.23457895246542	0.262064784869623	0.851165699652063	-5.21254244522048
O14525-1	ASTN1	0.0698985391994064	3.27726659116991	0.495235174523648	0.637628481206427	0.914909099619697	-5.21277182479884
Q8NF37	LPCAT1	-0.0595141121928128	3.33019699009328	-1.89392343251696	0.105875473115246	0.815312661645783	-5.21312998117241
Q9UJM3	ERRFI1	0.0972384031123366	3.34307209010111	0.957455063213845	0.374444326177738	0.860794837423064	-5.21318571625504
O00408-1	PDE2A	0.0397227383617949	3.28403579916626	0.288774434438135	0.782240378114268	0.950056204455666	-5.21331879507194
O94900	TOX	0.17523207041123	3.2774175887626	1.44811480457737	0.196571542297256	0.843173051975301	-5.21384595686392
P17020	ZNF16	-0.0658949079346443	3.33039887110409	-0.547190303111488	0.603521165693484	0.902898858079843	-5.21459662722936
Q96BZ8	LENG1	0.0883938530204965	3.30806877515941	1.57617141656566	0.16485244950514	0.837706900464479	-5.21475783476211
Q9UDX5	MTFP1	0.114502133413405	3.34219250956507	1.22971464851299	0.263758489130375	0.851165699652063	-5.21582928996434
Q6NUK1	SLC25A24	0.126060152904005	3.35202561084366	2.24654761720183	0.0646763662415808	0.794145183792996	-5.21913142733294
O75208-1	COQ9	0.152840239291573	3.33569397309463	1.7829631574091	0.12365394113957	0.827935143244545	-5.21922593793468
Q86Y56	HEATR2; DNAAF5	0.0648242402802499	3.31139358769678	2.21664567967261	0.0674248320378751	0.797430500224524	-5.21951542123062
Q09019	DMWD	-0.0898534399651264	3.34783253814052	-1.64896949020751	0.149036388976681	0.832891722183645	-5.21974086245813
Q9H7D0-1	DOCK5	0.0677799496150401	3.30262142264018	2.21215508276124	0.0678478569208667	0.797430500224524	-5.22001880050036
O60563	CCNT1	0.0571269418789511	3.284865141409	2.1020866647082	0.0791127560031769	0.800257563648142	-5.22099477982803
O15318	POLR3G	0.0739434042789243	3.3355136068054	1.4240613369108	0.203126357057574	0.844697015986012	-5.22134189491615
Q9BZ23	PANK2	0.0546167491981948	3.31688780381131	1.99149683537305	0.0923531373497237	0.808487494800536	-5.22142671072254
P10606	COX5B	0.194135360288892	3.32951473753942	1.97135568011497	0.0949950670497921	0.808544042593152	-5.22149392647223
O43815	STRN	0.0453191868434251	3.3313941166609	2.15683612714726	0.0732882786043965	0.798946025571133	-5.22198904754613
Q9UHN6-1	TMEM2	0.0943029871391258	3.3130970735032	2.15372401218323	0.073607311376995	0.798946025571133	-5.22235000835771
Q9UDR5	AASS	0.0596660143877332	3.3827490892611	2.23519748504756	0.0657057748845529	0.794792074281579	-5.2226116130018
Q86TL0	ATG4D	0.0897175429731398	3.35081689756249	1.4715095243685	0.190383325714307	0.843173051975301	-5.22494344666449
Q7Z6V5-1	ADAT2	0.0741553347836848	3.32856548601032	1.5396804403598	0.173365990433209	0.841841449350234	-5.22507134186576
Q9BWF2	TRAIP	0.0666538960704833	3.33974930499104	1.51561526180695	0.179204470793979	0.841841449350234	-5.2251296270256
Q96Q07-1	BTBD9	-0.0779528430810364	3.30191826906504	-0.756040148179592	0.477573102179433	0.877498284623617	-5.22739676747269
Q14703	MBTPS1	0.0713634662840493	3.31684059437505	1.82404058277243	0.116753488540601	0.82130239854684	-5.22750071942499
Q8TAT6-2	NPLOC4	0.0516095787906604	3.3349502800403	2.43624455587579	0.0497404296915478	0.77916608621583	-5.22970738492504
Q8NBA8	DTWD2	0.0718082797688257	3.33832975657646	1.39144823300478	0.21233281503644	0.844697015986012	-5.2299583284991
A6NHG4	DDTL	-0.0838889877411545	3.33409764786762	-1.71974444976299	0.135059100284881	0.831977927427241	-5.23118858660342
Q03060-31	CREM	-0.0191473604129255	3.28826037790138	-0.141944183881583	0.891659866003606	0.973455091484694	-5.23146853387659
Q8WW33	GTSF1	0.0718045922532981	3.34424986918296	1.89275933882719	0.106048182420781	0.815312661645783	-5.23243308011302
A8MPS7-1	YDJC	-0.124063379861371	3.38908659438761	-0.946767671020857	0.379453367795824	0.860794837423064	-5.23330936159638
Q86VU5	COMTD1	0.234649745416998	3.25029615411521	0.882563159777916	0.410635973914928	0.864295639524382	-5.23337131159182
O76021	RSL1D1	-0.239335035692044	3.16247361363741	-2.21110437691701	0.0679472293235882	0.797430500224524	-5.23348037992451
Q8TER5	ARHGEF40	0.0464130299653182	3.3251016079276	2.20624042402427	0.0684091997190606	0.797430500224524	-5.23418752830426
P29373	CRABP2	-0.111327728576305	3.35834475727539	-1.40649545976832	0.208038891160655	0.844697015986012	-5.23453437387
Q9P2F5-1	STOX2	0.065692039424619	3.32038355046479	1.6141860554288	0.156404307663168	0.836128786680491	-5.23480864420955
A8MTY0	ZNF724P; ZNF724	-0.0776446431843074	3.27293931093697	-1.47479630115139	0.189528480138976	0.842844980924057	-5.23498893873835
Q9UKI8-2	TLK1	0.0777605563153312	3.31788984254363	1.70432891113917	0.137991446202247	0.831977927427241	-5.23519295368469
Q8N6S5	ARL6IP6	-0.151374855899496	3.29146719926671	-1.30619301167456	0.238206674490275	0.844697015986012	-5.23540331207925
P34932	HSPA4	0.0301829592481392	3.3285027757355	2.89804907311892	0.0266412097322438	0.657962775593099	-5.23552851419935
Q8WZ73-1	RFFL	0.0806736389169828	3.31711089759278	0.958654575104901	0.373885352741094	0.860794837423064	-5.23581711477394
A2RU54	HMX2	-0.0299078298770432	3.4291016192478	-0.189970876474065	0.855447092050522	0.964811650124253	-5.23616457328337
Q5JR12	PPM1J	0.0930649614774773	3.259882537355	0.8373325686028	0.433730076809916	0.869696789938134	-5.23795560297992
Q96EN9-1	C19orf60	0.0437548169263621	3.33389499676031	0.279032387460028	0.789365554950497	0.950056204455666	-5.23871424858575
Q567V2-1	MPV17L2	0.147424935477341	3.34989420072323	1.02901815335449	0.34222676497048	0.860794837423064	-5.23897271658761
P61968	LMO4	0.0584338303152007	3.364249326146	1.60184228121474	0.1591014349133	0.836564269909247	-5.2390129105851
Q9NV64-1	TMEM39A	0.0949784464217548	3.37482397076618	0.807772382045497	0.449326292371457	0.87341118612591	-5.23917129068969
Q8IVQ6	ZDHHC21	0.101535584582301	3.29128489885401	1.21966768418235	0.267286793031495	0.852555908517457	-5.23981276083287
P24752	ACAT1	0.080171276084056	3.36305400217295	2.29060871160352	0.0608354021629229	0.783561602826401	-5.23991252893132
Q96HS1-1	PGAM5	0.0549774012059486	3.35057816566557	1.89307804734691	0.106000869831533	0.815312661645783	-5.24006489672072
Q5T7B8-1	KIF24	0.0627222795002253	3.32001741202471	1.87844172399743	0.108195406912012	0.815361488070325	-5.24051870298256
P16401	HIST1H1B	-0.31765216075931	3.1696035728405	-2.04044129717695	0.086237039252881	0.805708062878273	-5.24101868245553
P14672	SLC2A4	0.0767454088419111	3.3022874097354	1.23818019531644	0.260816956131685	0.851144837764215	-5.24127076997083
P25686-3	DNAJB2	0.0566052295302378	3.33560167087101	1.66139185796654	0.146486385788011	0.832891722183645	-5.24425112769698
Q9P2J2	IGSF9	0.0577209368004625	3.32015737543848	0.505338533119122	0.630915837260783	0.912125289525822	-5.24441159537565
Q9H6J7-2	C11orf49	0.076117050870196	3.31770078348154	1.48583856462275	0.186682483951571	0.842176722648431	-5.24482418493729
Q0VDD7	C19orf57	0.0671518182724619	3.32221105782058	1.69023394454002	0.140726363683341	0.831977927427241	-5.24483958085132
Q6T4R5-1	NHS	-0.114034940735979	3.20446585889073	-1.36055761679253	0.221400422230078	0.844697015986012	-5.24488595077766
P47755	CAPZA2	0.0452352028374625	3.32399592621165	2.16361223837708	0.0725985221725912	0.798946025571133	-5.24502194652722
Q9P2D0	IBTK	0.0535095535778173	3.31759604206044	2.23297037525557	0.065909738138945	0.794974601083091	-5.24505750395319
O60245-2	PCDH7	0.0891103735862732	3.32602768658831	1.04352167766622	0.335975490624238	0.860794837423064	-5.24549818862865
Q9Y2R0	COA3	0.138841164631856	3.34720086010279	1.75848498898888	0.127954130270987	0.83144027937145	-5.24562240033713
Q14106	TOB2	0.0857169346251272	3.37128087679896	1.1161058679378	0.306073530718138	0.858059114626327	-5.24608282557426
Q8IXQ6-2	PARP9	0.0883759092468009	3.35148655989666	1.01511014895761	0.348308911651532	0.860794837423064	-5.24636922669767
Q9BZF9	UACA	0.101307148856249	3.29678048639334	1.70293184174706	0.138260218745319	0.831977927427241	-5.24659239313781
Q9Y3E2	BOLA1	0.084615273612891	3.33443298269046	1.18545468623016	0.279608648354963	0.853779374610611	-5.24678015245863
P51788-1	CLCN2	0.0847130019166632	3.27594876875314	1.06597909688821	0.326478767058506	0.859067866855967	-5.24688729314293
Q13829	TNFAIP1	0.0484028744700321	3.3599296590751	0.374331606364241	0.720724667662657	0.935819443868521	-5.24852298009202
Q9BZF2	OSBPL7	0.00676851462360321	3.28119577848105	0.0490163542255823	0.962459346043581	0.988178279700912	-5.2499365673112
Q8TB37-1	NUBPL	0.0975373106801699	3.37741915830533	1.8681366308207	0.109767493456059	0.817198122281546	-5.25008524905129
P98172	EFNB1	0.05632820091874	3.32256369004392	1.60398383899249	0.158630356288004	0.836564269909247	-5.25054903620261
Q9NRL2	BAZ1A	-0.0884621494025228	3.27653990091976	-2.52607252116005	0.0439713588852228	0.752659646133916	-5.25142604170408
A4D1S0-1	KLRG2	0.0758664389955692	3.31917894197061	1.50105974400094	0.182824368412122	0.842176722648431	-5.25208833658402
Q9ULN7-5	PNMAL2; PNMA8B	-0.040676522064851	3.32696812599321	-0.271164561690335	0.795136244791349	0.951326117648605	-5.25276760646485
P05204	HMGN2	-0.488079298849973	3.2286384669	-1.60340438243334	0.158757688554799	0.836564269909247	-5.25336717936199
Q96SZ5	ADO	0.0526451280983275	3.34730445656399	1.81277391469549	0.118607593571119	0.822330490088492	-5.2535746772145
H7BZ55	LOC728763; CROCC2	0.0738765511471587	3.32149183024127	0.594674189093925	0.573272859176966	0.892198645045375	-5.25383241761478
P49748-3	ACADVL	0.133681413399899	3.34348825065751	2.37929556882419	0.0538042922434467	0.77916608621583	-5.25395413947632
Q8N9Z2-1	CCDC71L	-0.162724602172463	3.20529666013285	-1.37480818871192	0.217174737484178	0.844697015986012	-5.25403253665733
P52739	ZNF131	0.0770005962220848	3.31520251996942	1.7039890925962	0.138056775050028	0.831977927427241	-5.25533277375981
O95568	METTL18	0.0698919528664973	3.3198633979219	1.81390212237401	0.118420633131806	0.822330490088492	-5.25577361389621
Q8NA72	POC5	0.0843571257583891	3.36324752897911	1.99885049498329	0.0914070576863577	0.808487494800536	-5.2561779589282
Q96JQ0	DCHS1	0.121990283046736	3.31767082818684	2.33648935798743	0.057086069270242	0.77916608621583	-5.25734710080186
O00189	AP4M1	0.0602216635955359	3.32496859171347	1.57821280642637	0.16438801622131	0.837706900464479	-5.25743013160998
O95857	TSPAN13	0.0726984772909076	3.28588189693135	1.17104495829749	0.284942048888169	0.854601857528813	-5.25806633759691
Q9Y3C6	PPIL1	0.096660529734519	3.30941498034634	2.19819789312753	0.0691801593593708	0.797430500224524	-5.25815530141952
Q17RS7	GEN1	0.0429596254052961	3.31965266973751	2.00293378177548	0.0908859415090601	0.808487494800536	-5.25834481850447
O75330-3	HMMR	0.0538729288797192	3.31635776161928	2.33256098080748	0.0573974959597609	0.77916608621583	-5.25834684623051
Q92947-1	GCDH	0.0916757349093853	3.36479993454131	2.0018103617801	0.0910290154745343	0.808487494800536	-5.25972026407549
Q86YV5	SGK223; PRAG1	0.0603318734141926	3.35331446295895	1.68727951302613	0.141306218784306	0.832458402675599	-5.26017152832355
O15370	SOX12	-0.0622220060430612	3.34290560071066	-1.54799370542463	0.171390854980657	0.838939616628745	-5.26043774924344
Q9HCJ0-2	TNRC6C	0.0483043688289077	3.31805218021542	1.94418375334634	0.0986797005906008	0.809378699915685	-5.26066002212255
Q02446	SP4	-0.160053160126957	3.30450354199061	-1.27448624582096	0.248523446447916	0.847984763466763	-5.26181414151948
O14828	SCAMP3	0.119633331665778	3.29028442367596	1.65669129342213	0.147446337944177	0.832891722183645	-5.26270364045437
Q9BUB4	ADAT1	0.0483301573706826	3.33597188731957	2.10283624040163	0.0790299081165616	0.800257563648142	-5.26294257713903
O60279	SUSD5	0.146337955160086	3.29358051841849	1.89161955274762	0.106217556447615	0.815312661645783	-5.26341100309508
Q9NWQ8	PAG1	0.0714421837128181	3.33291583853058	1.5624406633586	0.168008638095192	0.837706900464479	-5.26394970967574
Q9NPJ3-1	ACOT13	0.073180457317068	3.35799411991803	1.58925199411205	0.161897864885103	0.837706900464479	-5.26586058483235
Q8NB59-1	SYT14	0.0781624810301857	3.31191572157028	1.33166040798409	0.230196858240649	0.844697015986012	-5.26670709072664
Q96DB5	FAM82B; RMDN1	0.0834520173387467	3.3480518242993	1.86970891868114	0.109526179689497	0.817198122281546	-5.26711529495484
Q8N5I9	C12orf45	0.0525029843205598	3.33707477946754	1.70208020585939	0.138424307129543	0.831977927427241	-5.26781358090483
O43272	PRODH	0.0708647643850543	3.35048220563088	0.65769788215176	0.534558702376345	0.887061881193586	-5.26983159063896
Q13394	MAB21L1	0.0477285099840201	3.33518862362465	2.20647488735224	0.0683868568806992	0.797430500224524	-5.27016290664703
Q8WUT4	LRRN4	0.0377034647222774	3.3322423750969	0.301011042065756	0.773323325587649	0.947609709942376	-5.27025238636882
P09601	HMOX1	0.0844268801180908	3.31624503674762	0.739174448430428	0.487042305894952	0.880316299292276	-5.27026579772035
P10515	DLAT	0.143618845337975	3.36202296005359	2.08189529085253	0.0813779752220059	0.800328542096179	-5.27070924991246
Q8WVH0	CPLX3	-0.0823105100384128	3.33412425210865	-1.63679091026673	0.151577562981612	0.832891722183645	-5.27364722245039
Q9Y5R8	TRAPPC1	-0.254420119660025	3.31850931159483	-1.56799370735398	0.166725397618618	0.837706900464479	-5.27511981462303
O15304	SIVA1	0.0679249808815612	3.34699261546497	1.51948968465295	0.17825224232912	0.841841449350234	-5.27583193568231
Q8TD30-1	GPT2	0.0916671518266283	3.40978882519032	2.0992276527013	0.0794295642809138	0.800257563648142	-5.27595855361105
P57058	HUNK	0.0573456906437845	3.37192172476388	1.59938966275168	0.159642568565616	0.836564269909247	-5.27645644537833
P05155-3	SERPING1	-0.0669228260021204	3.30431064224953	-1.67120894098501	0.144500839955007	0.832891722183645	-5.27658553698781
Q16595-1	FXN	0.0773517779239198	3.38535352439268	1.70793883024848	0.137299294536155	0.831977927427241	-5.27671212538684
Q8NE00	TMEM104	0.172089806736814	3.24317016457128	1.08009967039968	0.320620528892827	0.85858695849907	-5.27674136380076
Q16584	MAP3K11	0.0804563560935655	3.3228054366064	1.15505741960393	0.29096039175844	0.854845609140163	-5.27702499200756
Q96BY9	TMEM66; SARAF	0.125759085723762	3.31173850315002	1.62605918555517	0.153851096365929	0.832891722183645	-5.27732169124549
Q9NVP1	DDX18	-0.160889118379337	3.21358155579815	-2.51164043868342	0.0448486149522136	0.754616969175221	-5.27824060914042
Q9H813-2	TMEM206	0.0762051886629636	3.30434865160503	1.65715610820366	0.147351145119825	0.832891722183645	-5.27922880866269
Q9H579-2	C20orf132; MROH8	-0.0615592154284373	3.2275459274803	-0.454220056562052	0.665260149513467	0.921049172064188	-5.28075187895875
Q92628	KIAA0232	-0.0866022451513771	3.30365926861848	-0.702696019761614	0.507955977244353	0.882302947037524	-5.28092674245956
Q9UK41-1	VPS28	-0.063206756116762	3.30969169824595	-1.77214078403832	0.125537465938107	0.83071529676436	-5.28225407339733
Q9BY41	HDAC8	0.0618301417257466	3.30617293274424	1.70494186014113	0.137873684566343	0.831977927427241	-5.28325955001027
Q8TAQ5	ZNF420	-0.0614694145637102	3.23078210879408	-0.458630064998541	0.662260425649296	0.919334372724818	-5.28414689516426
Q5T5C0-1	STXBP5	0.0553560848379775	3.30907335944955	1.83490643548036	0.114992369866838	0.82130239854684	-5.2861345898459
Q7Z7N9	TMEM179B	0.0636809696924212	3.31320614459342	0.514949634953414	0.624565644111642	0.910605644699869	-5.28619502330432
Q9H061-1	TMEM126A	0.209230874443928	3.34300018701479	1.68952218596694	0.140865847790698	0.831977927427241	-5.28639399481186
Q9BYP7	WNK3	0.0552455316237623	3.32772423176877	1.93831479045676	0.0994941479376796	0.809378699915685	-5.28663257822956
Q7L9L4-2	MOB1B	0.0899973160565106	3.29168239396642	1.78985878098255	0.122468271721663	0.827456862194641	-5.28670145462322
Q01831	XPC	-0.0923993455632	3.25283949329833	-1.79869750537944	0.120964764768096	0.826466793981307	-5.28711895672854
Q9Y3Q4	HCN4	-0.0739281400718142	3.300731310451	-1.02442506435639	0.34422588136685	0.860794837423064	-5.28850809647286
Q15070-1	OXA1L	0.164228498902937	3.3373776278018	1.7699522176322	0.125921756857645	0.83071529676436	-5.28925386205122
Q6P0Q8	MAST2	0.0663067374858543	3.30843819262172	1.46715987616968	0.191520088217709	0.843173051975301	-5.28957272293371
P61927	RPL37	-0.658837729124239	3.16110407565976	-1.68874348198328	0.141018603911825	0.831977927427241	-5.28961110528402
Q13635-1	PTCH1	0.0795677565628703	3.30331616735992	1.51328860514939	0.179778579206616	0.841841449350234	-5.29103341349383
Q96E11	MRRF	0.0868729506040055	3.33217289878248	1.70192402593096	0.138454419398696	0.831977927427241	-5.29110845605018
Q8IYB4-3	PEX5L	0.0481321391458969	3.33764856485604	1.85818285801506	0.111307447351888	0.81804545016262	-5.29126017145811
Q14728	MFSD10	0.0705126411755797	3.3070224327774	1.40942431142403	0.20721234538256	0.844697015986012	-5.29187554568742
O00534	VWA5A	-0.116665656378927	3.35063015942391	-0.996046417155243	0.356785698091144	0.860794837423064	-5.29217039171747
Q5TH69	KIAA1244; ARFGEF3	0.071730837315169	3.28330235143888	1.11929393247849	0.30481236128981	0.858059114626327	-5.29256632143886
Q9Y3D6	FIS1	0.12397390954898	3.31702223129872	1.57710532245622	0.164639824483463	0.837706900464479	-5.29262575954545
Q96MH7	C5orf34	-0.353479895938028	3.36297714753003	-1.13782978595054	0.297565482760651	0.858059114626327	-5.2928599722812
Q15293	RCN1	0.047335606381764	3.3162317449088	2.22141636308967	0.0669783936828972	0.797430500224524	-5.29464424795758
P52815	MRPL12	0.105590808437755	3.34300423251215	2.06430938861245	0.0834045067107431	0.800328542096179	-5.29502403540996
Q9UPY3	DICER1	0.0473888532185581	3.31864762298567	2.43516610269865	0.0498143303926863	0.77916608621583	-5.29524118062417
Q96GJ1	TRMT2B	0.0749833912049559	3.32959988394495	1.39012230043007	0.212715018862587	0.844697015986012	-5.29531257294061
Q96Q45-3	TMEM237	0.0349653484145929	3.31669858391148	0.254781107357094	0.807197778899325	0.95499432984737	-5.29556210054978
Q9C0B7	TANGO6; TMCO7	0.0700668844690863	3.31502920335445	2.02405958493612	0.0882372339479786	0.808487494800536	-5.29598636773491
Q16611	BAK1	0.0757734253202238	3.33214161337223	1.42145094449096	0.203849625283815	0.844697015986012	-5.29612036080816
P51956	NEK3	0.0831111781857362	3.30633387007045	1.53212960712493	0.175178460764589	0.841841449350234	-5.29657572295551
P50876	RNF144A	0.0396491517018606	3.37414760290914	0.318268460190796	0.760811639039957	0.943768723666232	-5.29660945520216
O15405-1	TOX3	0.0606545197301517	3.34627721306056	0.605170056801476	0.566710198773481	0.891562169622263	-5.2966934147741
Q6P1L8	MRPL14	0.0839064898431781	3.32107426781061	1.22256359186577	0.266265640784569	0.851723093468981	-5.29672496830456
O43504	LAMTOR5	-0.162029294983365	3.28131113586547	-1.51201091472744	0.180094581789892	0.841841449350234	-5.29677194119143
Q9NUL7	DDX28	0.0682335922358946	3.34287972366455	1.97723823658155	0.0942156992067646	0.808487494800536	-5.29692486949186
Q9UKK3	PARP4	0.0729751565302811	3.33840564167265	1.93913180961891	0.0993803674568328	0.809378699915685	-5.29748854519332
Q9UPS8-3	ANKRD26	0.0665819848890086	3.32555311749583	1.95146296029628	0.0976788040511154	0.809378699915685	-5.29823149647471
Q9UHG2	PCSK1N	0.157061073581749	3.32133321926334	1.18885517382694	0.278362542580991	0.853779374610611	-5.29879196313332
Q9UNK9	ANGEL1	0.0733522863700649	3.33950700198598	0.983632075376535	0.362393205527869	0.860794837423064	-5.29886942751984
P30837	ALDH1B1	0.0900252614882795	3.3888534176987	2.21980753365687	0.0671286063048991	0.797430500224524	-5.29978991896902
Q6R2W3	SCAND3; ZBED9	0.0551235182364133	3.29144986097991	0.353259055055734	0.735687566782354	0.937494606114203	-5.30001005533776
Q8NCS7	SLC44A5	0.0976299568927612	3.33134821878439	1.08214214542515	0.319780348753322	0.85858695849907	-5.30021387038207
P55201-2	BRPF1	-0.0387878282033297	3.3091444018595	-2.11686973880532	0.0774950365749554	0.800257563648142	-5.30041105601621
O43464	HTRA2	0.0881202254750679	3.32847356196863	1.70913100733377	0.137071449285936	0.831977927427241	-5.30057301305164
Q96HR8	NAF1	0.126142406966724	3.32577584601197	1.73936705795644	0.13141371938919	0.831977927427241	-5.30058072579413
Q9BXW7	CECR5; HDHD5	0.0753970588979581	3.3727112163865	1.85722658128956	0.111456513651165	0.81804545016262	-5.3012243456896
Q9NVI7-2	ATAD3A	0.0977347479330077	3.35589117813527	1.85212706621122	0.112254773692284	0.81804545016262	-5.30242101406463
Q9C0K0-1	BCL11B	-0.166054114142537	3.31931937115924	-0.921550424377675	0.39147740684804	0.860794837423064	-5.30316445285653
Q8WUK0	PTPMT1	0.0749790961233371	3.33384694974105	1.10757318258877	0.309470383527886	0.858059114626327	-5.3043545471586
P09467	FBP1	-0.0649627198351264	3.29856393142475	-1.15877540610007	0.289551270116182	0.854601857528813	-5.30531151182604
Q16645-1	FKBP1B	0.0304029779764095	3.33614263139727	0.232182548653289	0.823929453367394	0.956486677538005	-5.30562433270018
Q96E16	C8orf40; SMIM19	0.0694060444596406	3.27454798408073	0.889089905846686	0.407380469719547	0.864295639524382	-5.30669529286034
Q9Y6T7-1	DGKB	-1.28883723767077e-05	3.29933856967845	-8.79432791850623e-05	0.999932614632341	0.999932614632341	-5.30678701451442
Q5TC84	OGFRL1	0.0678228053434047	3.33269931816424	0.689895785926447	0.515433683559014	0.882302947037524	-5.30798740528233
Q14995	NR1D2	0.0585476874142833	3.3467825255093	1.40255946472679	0.209154388064451	0.844697015986012	-5.30959419647367
P19256	CD58	0.0852200007401508	3.32778730561937	1.08158706846833	0.320008502503946	0.85858695849907	-5.31166428865694
Q9Y6X2	PIAS3; LOC101060431	-0.725413885670571	3.12794183393792	-1.23721469240238	0.261150994893007	0.851144837764215	-5.31206176394566
Q5U5X0	LYRM7	0.277361892138138	3.2644986290272	1.33646915330651	0.228711688973264	0.844697015986012	-5.31280537758237
Q8N960	CEP120	0.0554889437756912	3.33075325465851	1.81450818411615	0.11832031945824	0.822330490088492	-5.31291497575609
P09493-5	TPM1	0.0944022576187234	3.29047469714802	1.40018910811042	0.209828790928714	0.844697015986012	-5.31420852052545
Q5XUX0-1	FBXO31	0.0684163293612691	3.35605227441539	0.896834243412092	0.403542807840218	0.863398800063926	-5.31500840914522
Q9NV06	DCAF13	-0.0897910003136882	3.32517766664872	-2.16169361867437	0.0727931461257983	0.798946025571133	-5.3157196472782
O75251	NDUFS7	0.0898810328671338	3.34854702037943	1.64156165565181	0.15057720578074	0.832891722183645	-5.31590321944687
Q9NPF0	CD320	0.0877009086077171	3.33604805005758	1.6101821421922	0.157274369076121	0.836128786680491	-5.31774453835592
Q7Z388	DPY19L4	0.0705366571135884	3.314153437408	1.22868459256171	0.264118360114988	0.851165699652063	-5.31999774501662
Q49AM1	MTERFD3; MTERF2	0.0633031947278164	3.36382224592069	0.610746087727227	0.563242236953047	0.891562169622263	-5.32037612579862
Q9NX00	TMEM160	0.0961022512705309	3.34081279478681	1.09231222647364	0.315623783426181	0.85858695849907	-5.32044981870969
P0C0L4-1	C4A; C4B	-0.0769168320725358	3.28183943903577	-1.50603389664666	0.181579725300015	0.841841449350234	-5.32186431421194
O15111	CHUK	0.0983337509219314	3.29440354146369	2.10730885910277	0.0785373975107966	0.800257563648142	-5.32352126392272
Q6ZNW5	GDPGP1	-0.085362262879511	3.38084527181994	-1.19832515422779	0.274917296566571	0.853779374610611	-5.32413047760758
O15033-1	AREL1; KIAA0317	0.0735672946505042	3.33368617829306	0.986594198457975	0.36104894800158	0.860794837423064	-5.32434122530282
Q02338	BDH1	0.0911085909672919	3.36890615460792	1.35469083410025	0.223161495353736	0.844697015986012	-5.32472658861502
Q92604	LPGAT1	0.0896339700335939	3.30038071556561	1.13815611962417	0.297439203325705	0.858059114626327	-5.32558293031135
Q9BXB1	LGR4	0.0765452442669105	3.34788973295859	1.05363767115369	0.331670256403154	0.860794837423064	-5.32566179912859
Q9Y6N1	COX11	0.142644056548502	3.36376912750761	1.401760989779	0.209381345983064	0.844697015986012	-5.32642544259969
Q9Y608	LRRFIP2	0.0720328340562422	3.3040078766836	1.86446075940612	0.110333719279729	0.817198122281546	-5.32817706674854
Q9H694-1	BICC1	-0.131751931678198	3.33257171849809	-1.44798878207776	0.196605372855278	0.843173051975301	-5.32832645224839
Q5SQI0-1	ATAT1	0.0513385734384465	3.33614138349124	1.8078754075631	0.119422715226148	0.822859148876231	-5.32928176042385
Q9UHQ9	CYB5R1	0.082943861352592	3.35585625783388	1.74419880317309	0.130530868006608	0.831977927427241	-5.32967051095991
P98173-1	FAM3A	0.0647839478792518	3.28126282267853	1.24842560346783	0.257295147671261	0.849130999380513	-5.32998007263302
P12235	SLC25A4	0.132221095261435	3.31950503383904	1.29137071262163	0.242981512891719	0.844697015986012	-5.33079268758791
Q53EL9-1	SEZ6	0.0675632374799287	3.30309805173118	1.94322463908426	0.0988123418588011	0.809378699915685	-5.33186624956041
P10071	GLI3	0.0682668376555829	3.29130671901781	1.43427717326623	0.200318342141894	0.844666569133223	-5.33189108662022
P68036-3	UBE2L3	0.0948716252194921	3.35500771160356	1.88982376763537	0.106484958129171	0.815361488070325	-5.33201059259486
Q9H7H0-3	METTL17	0.059385916139102	3.34593027072961	1.64743939883502	0.149353404032687	0.832891722183645	-5.33221451917576
Q6P4H8-1	FAM173B	0.101951023194283	3.3489074251491	1.21486139202624	0.268989050994593	0.853204489542609	-5.33267306014734
O95072-1	REC8	0.0543763464229546	3.31738250013104	1.69269133923935	0.140245808111441	0.831977927427241	-5.33438944638262
P53007	SLC25A1	0.164295366755734	3.34988161490148	2.03190676378556	0.0872733192399778	0.808390347610093	-5.33474838810844
Q7Z401-1	DENND4A	0.0414548268611624	3.31340069286136	2.10847731381629	0.0784092464184607	0.800257563648142	-5.33491457219076
Q8WUJ0	STYX	0.0725956301534726	3.3203860369296	0.836761823333534	0.434027445009016	0.869696789938134	-5.33652202204669
Q92575	UBXN4	0.0499005572849967	3.34421530581423	1.92411190449904	0.101492993841762	0.809378699915685	-5.33686361296727
Q8NEL9-1	DDHD1	0.0502116252342728	3.32565820486726	1.97779737040197	0.0941419554186671	0.808487494800536	-5.33702914712247
Q9H2K2	TNKS2	0.0604035476876985	3.36596746640483	0.602114258347557	0.568616185306062	0.891874225702747	-5.33846971319343
O14917	PCDH17	0.0802182818201213	3.40792703951093	1.19741681183198	0.27524616535644	0.853779374610611	-5.33890601197881
Q8TEW6	DOK4	0.0619692309025825	3.38710965515544	1.64505326202628	0.149849068721609	0.832891722183645	-5.33954894804082
P55210-3	CASP7	0.0628489052307018	3.34165995440754	0.596446367293061	0.572161603060257	0.891998138569071	-5.33965737620886
P30825	SLC7A1	0.0699957062338565	3.32276085266497	1.43617516328958	0.199800576950985	0.84405644574022	-5.33983950970108
Q8TF61	FBXO41	0.0267801051994791	3.31917931726849	0.238879413321935	0.818960194362503	0.956486677538005	-5.34084329873735
Q9HCJ1	ANKH	0.0699226245704824	3.32521234984649	0.938176675540084	0.383517329106745	0.860794837423064	-5.34103365390188
Q96MG8-1	PCMTD1	0.248445368278695	3.23757952731531	0.920095203812039	0.392180088940308	0.860794837423064	-5.34164800024058
Q2M2I8-1	AAK1	0.0604584572934675	3.30840375431704	2.03812846702754	0.0865166334152955	0.805708062878273	-5.34201244450373
Q6ZT07	TBC1D9	0.0777050432806466	3.33605492038586	1.0754701122278	0.322531631241251	0.85858695849907	-5.34234894922425
O14508	SOCS2	-0.00212333756706985	3.33379932212374	-0.0137148639841109	0.989491550917054	0.996216009717968	-5.34245733156285
P37108	SRP14	-0.191291496746809	3.27705641179639	-2.18788777212276	0.0701815594460117	0.797430500224524	-5.34290801224845
P68543	UBXN2A	0.0721901505316372	3.32545510146381	0.975519129937951	0.36609517004773	0.860794837423064	-5.34329433949843
O75486-1	SUPT3H	0.0953715842127089	3.31456556095953	0.799123993454714	0.453964280539643	0.8747507236465	-5.34507130864539
Q8WV92	MITD1	-0.0646096681721805	3.32984721075298	-1.34206159134242	0.226995260365328	0.844697015986012	-5.3453951091278
O75037	KIF21B	-0.0228365209770577	3.29775734283802	-0.17297099561052	0.868226524379592	0.968163138438525	-5.34546061065553
Q15043	SLC39A14	0.0669206574387664	3.32507978076173	1.6341934384405	0.152124881827591	0.832891722183645	-5.34584074784186
Q6UWY0	ARSK	-0.0762373437981342	3.32245706415676	-1.30142041496799	0.239734965119574	0.844697015986012	-5.34597462740028
O75973	C1QL1	0.0596485437119417	3.29790829005855	1.55192273758068	0.170464733881389	0.837706900464479	-5.34600622186194
P46937-9	YAP1	0.0824849448183436	3.32469638728299	1.24453929173034	0.258626143038164	0.849130999380513	-5.34630139931961
Q9NY72	SCN3B	0.108358895623862	3.29095818159397	1.36536244999702	0.219967448190695	0.844697015986012	-5.3465939799535
P00813	ADA	0.112372477188367	3.26518814653089	0.744226952757621	0.484192245446011	0.880316299292276	-5.34702041644265
Q9NWX5	ASB6	0.0501878407756035	3.32959775408425	1.67564802436123	0.143611529128394	0.832891722183645	-5.34794323082823
Q9UKB3-1	DNAJC12	0.103387511986525	3.31994111234397	1.70425251450512	0.138006130567039	0.831977927427241	-5.34825233411162
O00399	DCTN6	0.0587670636459043	3.32092786995057	1.64310790897569	0.150254334812581	0.832891722183645	-5.34908184835651
Q96JG6	CCDC132; VPS50	0.0392805614555689	3.31606907495756	2.15937200426374	0.073029363854867	0.798946025571133	-5.34920968966686
Q9UGJ0	PRKAG2	-0.0024644381984067	3.34697276570409	-0.0219207868583922	0.983205052402737	0.993815607715438	-5.34924239729697
Q2MV58-2	TCTN1	0.0839525505492459	3.31132294057999	1.04962911439813	0.333370858629514	0.860794837423064	-5.34992835870472
O43490-1	PROM1	0.0498608565283387	3.30413798593867	1.64179127055818	0.150529218314982	0.832891722183645	-5.35020442596292
Q9P0P0	RNF181	0.0951528610773974	3.33013924088922	1.29437058926931	0.242008359678277	0.844697015986012	-5.35143906095997
Q5T7V8	GORAB	0.132020253229314	3.29184242923737	1.53340096087366	0.174872052703714	0.841841449350234	-5.35691301901961
Q5SSJ5-1	HP1BP3	-0.172054547262406	3.20334001382205	-2.02821236919014	0.0877257920325144	0.808390347610093	-5.35711227465845
Q99490	AGAP2	-0.0380804745787033	3.26916595000778	-0.324033790163754	0.756649036151476	0.941817265278258	-5.35722981863138
O76062	TM7SF2	0.0756095824289126	3.31348981118575	1.07747948580544	0.321701007446624	0.85858695849907	-5.35758294367407
Q15542	TAF5	-0.0390376233800852	3.34331789661756	-2.0600083283556	0.08390788456698	0.800328542096179	-5.35792627618824
Q8TBP0	TBC1D16	0.0635786239908721	3.31311107119984	1.59066964324731	0.161580679073548	0.837706900464479	-5.35912881873157
Q14184	DOC2B	0.0582319682972556	3.34707994895637	0.512683710750643	0.626059640952528	0.910632205021859	-5.35914298408928
P0CG13-1	CHTF8	0.118611472318996	3.28314033604263	0.780006319951726	0.464336929607353	0.876454797415721	-5.35942221926212
P13796	LCP1	0.0542755805962646	3.30343760854783	1.92471395133669	0.101407457117573	0.809378699915685	-5.36002053622139
Q7Z7L7	ZER1	0.0623639808769563	3.28444808014842	1.86126693046267	0.110828037736123	0.81804545016262	-5.3600968021109
Q9NZ20	PLA2G3	0.0669970636615196	3.32734441546065	0.591484603225673	0.575276154708197	0.893897962584757	-5.36029071521531
Q9Y287	ITM2B	0.10144410724805	3.29560525614761	1.35959089190454	0.22168974783178	0.844697015986012	-5.36099576430579
Q9UPZ9-1	ICK	-0.0617208779593463	3.33870774330228	-0.704010854215955	0.507191943024628	0.882302947037524	-5.3610877897944
P17900	GM2A	-0.106879962931834	3.35166660878522	-1.37264371782228	0.217811839965039	0.844697015986012	-5.36186806218252
O95831-1	AIFM1	0.0805809429021983	3.34599915327702	2.24977849692328	0.0643863905943537	0.794145183792996	-5.36318253237265
P12821-1	ACE	0.0721701260402618	3.30337962475432	0.764485178844363	0.472879552156173	0.876454797415721	-5.36426365469612
P28329	CHAT	0.0674077855686963	3.31841247899078	1.30520076891357	0.238523699507383	0.844697015986012	-5.36438690939384
Q7Z6K1	THAP5	0.0833388486504541	3.39360118688578	1.2206806394548	0.26692922140975	0.852555908517457	-5.36504013365746
Q96S21	RAB40C	0.0672272999059184	3.31367613646027	1.39325148208093	0.211814023036704	0.844697015986012	-5.36526665378775
O94829	IPO13	0.0545160957633546	3.30596545449181	1.97846637021233	0.0940537975961674	0.808487494800536	-5.36533994909451
Q8N5C1	FAM26E	0.0701597966070751	3.33529180948218	1.21225189786486	0.269917175135973	0.853779374610611	-5.36676661399769
Q9Y2G2-5	CARD8	0.0644954998304446	3.30930282830171	1.39504139541056	0.211300205509255	0.844697015986012	-5.3671002816061
Q15672	TWIST1	-0.0649637671346781	3.38157066540836	-0.872919779313507	0.415481561703597	0.867684093539345	-5.36743697533018
P15104	GLUL	0.053306259944734	3.37625639089602	1.70434687947919	0.13798799268746	0.831977927427241	-5.3675439694299
P04179	SOD2	0.101935903137842	3.33294061763158	1.82698724564169	0.116273291169007	0.82130239854684	-5.36774029936447
Q52LA3	LIN52	0.104721346005193	3.4174924087297	0.997260452896995	0.356241029913288	0.860794837423064	-5.36934900620203
O43556-4	SGCE	0.064667343414397	3.37738388463491	0.812860713741655	0.44661335562104	0.872694129141925	-5.36975564012943
Q9ULI4	KIF26A	0.0730338695752451	3.32252527913701	1.50687432221529	0.181370212843661	0.841841449350234	-5.36985158567045
Q96N96-6	SPATA13	0.0532318091633393	3.31028856388576	0.43157091770524	0.680771879581407	0.927366835651526	-5.37068712791686
Q9BSG0	PRADC1	0.0813034362673084	3.29506757076229	1.12390283380729	0.302996790800246	0.858059114626327	-5.37074282250077
Q96TA2-2	YME1L1	0.127372302731651	3.3416646339259	2.05175751521627	0.0848821544740363	0.800328542096179	-5.37204199307132
P61586	RHOA	-0.144676450215351	3.36926460959918	-1.92995260508964	0.100666195620247	0.809378699915685	-5.37212858277332
Q9BUE6-2	ISCA1	0.106846483505655	3.35284644655412	1.79604392746736	0.121414240281374	0.826466793981307	-5.37250461922997
O15182	CETN3	0.101148280469932	3.32123936392667	1.8890292000983	0.106603486515944	0.815361488070325	-5.37295545625479
Q96SL1	DIRC2	0.0807886821577332	3.32334720300246	1.03699001039195	0.33877924574455	0.860794837423064	-5.3759204844861
P07093-1	SERPINE2	-0.0820518167168279	3.30696247237166	-1.3894657714641	0.212904496030505	0.844697015986012	-5.37645026296935
Q8IUQ0	CLVS1	-0.00896228040015077	3.35083564465603	-0.0779449596902597	0.940345923746296	0.985259379128849	-5.37729627417418
Q96EK4	THAP11	-0.0858835889905014	3.37095769053835	-1.45151800467933	0.195659979972353	0.843173051975301	-5.37731153391935
Q8NFY4	SEMA6D	0.0779349192472667	3.29182713889714	1.27789876514446	0.247394478103738	0.84693605029113	-5.37779881959324
O75618-2	DEDD	-0.0780002184625043	3.34986082129713	-1.01218320770569	0.349599855208709	0.860794837423064	-5.37849247825431
Q9P273	TENM3	0.0734833572234481	3.29222947091237	2.05123496832291	0.0849442419224305	0.800328542096179	-5.37849392636479
Q6P1M9	ARMCX5	0.074214686710767	3.34187250345294	1.54358408056611	0.172435885351606	0.840599731164319	-5.37876498216606
Q8IXI2-7	RHOT1	0.100864794290205	3.34757082071007	2.06888377075347	0.0828724979399367	0.800328542096179	-5.37928303970342
Q5T9S5-1	CCDC18	0.0638342103464935	3.31368027207732	0.919994783856907	0.392228614191867	0.860794837423064	-5.37955703563744
Q5TEU4	NDUFAF5	0.0653374972188663	3.39332389022887	0.81333004678475	0.446363714125046	0.872694129141925	-5.37967792342584
O60331-3	PIP5K1C	0.0520470916425808	3.32256931788033	1.47459992397812	0.189579455282223	0.842844980924057	-5.3797375744259
A6NDU8	C5orf51	0.0550421798926503	3.31815942448512	1.65796254866992	0.147186128029072	0.832891722183645	-5.37983242395225
O14775-2	GNB5	0.0547268308086835	3.35779905934978	1.50646587858225	0.181472006965368	0.841841449350234	-5.3802355725089
Q49AN0-1	CRY2	0.0616513063490999	3.36110075345099	1.42443387982401	0.203023327119014	0.844697015986012	-5.38048868700372
Q9NPG1-1	FZD3	0.0834997997599429	3.31429423666185	1.06937972979162	0.325059987880656	0.859067866855967	-5.38155388087054
P21554	CNR1	0.101929412233028	3.3126380645705	0.812827737355879	0.446630899749133	0.872694129141925	-5.38176525950406
O60449-2	LY75-CD302; LY75; CD302	-0.0604675531674665	3.24971293360537	-0.612442684172477	0.562189615456403	0.891562169622263	-5.3822893016499
Q9NYJ8-1	TAB2	0.0773137853729367	3.31919578185535	1.45071436105921	0.195874888119102	0.843173051975301	-5.38232632012646
P63000-2	RAC1	0.0662656721549475	3.34423028439513	2.04016141161242	0.0862708255221591	0.805708062878273	-5.38328882722775
O96008	TOMM40	0.143678060304913	3.33461895964602	2.05992981129569	0.0839171024213281	0.800328542096179	-5.38374010091035
Q8WWZ7-1	ABCA5	0.106707282547157	3.25644362725708	1.27348243706769	0.248856398619196	0.847984763466763	-5.38429793816374
P78540	ARG2	0.105362769316004	3.41565325729894	1.50550341922695	0.181712085766378	0.841841449350234	-5.38431419705336
Q8N5Y8-1	PARP16	0.0645943531488856	3.35675061635966	1.71811532484009	0.135366119811692	0.831977927427241	-5.38484777420253
Q7L0Y3	TRMT10C	0.0752169092506194	3.39399137780496	2.1273559866472	0.0763679866958522	0.800257563648142	-5.38489046776278
Q9NSB8	HOMER2	0.0639740145258561	3.31923201339586	1.72899524531718	0.133328479026624	0.831977927427241	-5.38493573888616
Q9Y3P4	RHBDD3	0.069258103887433	3.30689260683486	0.595427029509903	0.57280062809024	0.891998138569071	-5.38508339188352
Q9BVL4	SELO; SELENOO	0.0680391268332934	3.34073656817069	1.26082036321382	0.253090002321334	0.849130999380513	-5.38562475546031
Q96L73-1	NSD1	-0.00439520583291312	3.28884474266917	-0.0385794413471932	0.970447538665052	0.991448176686958	-5.3856947410133
Q07820	MCL1	0.065685159419818	3.31922339964839	1.02268812699836	0.3449843129449	0.860794837423064	-5.38615418033696
O14730	RIOK3	0.0852319346117619	3.35064033894645	1.73403920875118	0.132393944536276	0.831977927427241	-5.38638572143128
P10589	NR2F1	0.0574223256001019	3.33090862573555	0.519673397524012	0.62145736442597	0.910566067903929	-5.3864633665901
Q7L2K0-1	C16orf59	0.0713727876832029	3.29104908979202	1.23986305948015	0.260235616876717	0.851144837764215	-5.38683743833815
Q9BPZ3	PAIP2	0.0862385965254524	3.26324987264447	1.4834787562386	0.187287346077745	0.842176722648431	-5.38714535920895
Q8WTS6	SETD7	0.0491618023066228	3.34577487098267	1.69442237574544	0.139908245859071	0.831977927427241	-5.38771533157639
P82932	MRPS6	0.0557458244561734	3.39093679804325	1.62386417362666	0.154320102875951	0.833848695214315	-5.38777417512687
Q8WU58	FAM222B	0.0677818107042957	3.32729774912519	1.47345649552015	0.189876515802122	0.843044435412976	-5.38783784016328
Q92698	RAD54L	0.0480972497821471	3.314515913859	1.90425172032192	0.104355318919581	0.813226094936196	-5.38788718294931
Q66GS9-1	CEP135	0.0798037299538375	3.33037820553953	2.19025088792489	0.0699507284719573	0.797430500224524	-5.38817893736366
Q9Y2K9	STXBP5L	0.0795120794306145	3.31454062978392	1.39880324780561	0.210224004649025	0.844697015986012	-5.38820619284814
Q5GH72	XKR7	0.047138081268668	3.27047947872813	0.479765384615951	0.647979362150326	0.917085418566443	-5.38822521785592
P06280	GLA	-0.0560255432093124	3.33686214142016	-1.70399176373778	0.138056261416513	0.831977927427241	-5.38825730627419
Q9UHA4	LAMTOR3	-0.170919806922193	3.41301439911009	-1.13620125744878	0.298196338311056	0.858059114626327	-5.38829622906419
Q9UPG8	PLAGL2	-0.100349429823449	3.318492364433	-1.30046433711983	0.240042164605888	0.844697015986012	-5.38865023155445
Q9BQS8-4	FYCO1	0.0710431061268767	3.32017192404763	1.22423516485678	0.265677749360044	0.851610800802228	-5.38920904499225
Q6TFL4-1	KLHL24	-0.0633780713014094	3.32518717876674	-1.40447342606897	0.208611275923671	0.844697015986012	-5.38954991715805
Q8N3G9	TMEM130	0.0785767038817419	3.29320776375332	1.21407318653133	0.269269103091159	0.853204489542609	-5.38971926962543
Q0P6H9	TMEM62	0.113292320114219	3.3103613615825	1.26492936473398	0.251709277783119	0.849130999380513	-5.38974150265055
Q9BW91-1	NUDT9	0.079909120982098	3.31596506690538	2.09859267709927	0.0795001011390397	0.800257563648142	-5.39045843221461
O75787	ATP6AP2	0.0772974777902322	3.3410324151579	1.56699618109115	0.166955230856271	0.837706900464479	-5.39051365458005
Q6Y1H2	PTPLB; HACD2	0.0917128914554245	3.31583086544338	1.20919434397133	0.271008172413357	0.853779374610611	-5.39217462182936
P36894	BMPR1A	0.0669829631059399	3.34405729591816	1.3052931969765	0.23849415262659	0.844697015986012	-5.39243761749069
Q7Z7C8-2	TAF8	0.0576720319751916	3.32529573473699	1.31111055488899	0.236641012754431	0.844697015986012	-5.39281582028615
Q7Z406-2	MYH14	0.0649475202227796	3.33029116631062	1.16656833876484	0.286616482838208	0.854601857528813	-5.39293564881053
Q9P2K5-1	MYEF2	-0.0386888357997997	3.31505310822666	-2.32411837102024	0.0580727803608567	0.77916608621583	-5.39370779833165
P57060	RWDD2B	0.0802745352906431	3.28186346885232	1.1507362985467	0.292605382004014	0.857047949538111	-5.39409467019036
Q8N394	TMTC2	0.0802902279940672	3.32180663157396	1.13105164670672	0.300198574612979	0.858059114626327	-5.39409991879785
Q96N38-1	ZNF714	-0.0802748367039884	3.26900046279153	-1.12629755236251	0.302057019902696	0.858059114626327	-5.39568987961847
Q8NHG8	ZNRF2	0.0602870793164329	3.33479072270944	1.25351369691119	0.255561594338881	0.849130999380513	-5.39576844924005
P62330	ARF6	0.084178924931359	3.31535547857239	1.61506682015606	0.156213530297957	0.836128786680491	-5.39660048536651
O95298-1	NDUFC2	0.200607076940686	3.32956781465253	1.71614785343774	0.135737804052111	0.831977927427241	-5.39709369407197
P35556	FBN2	0.0758188294741159	3.30311183055406	1.72561238147563	0.133958830703022	0.831977927427241	-5.39721790508476
Q9Y2E8-2	SLC9A8	0.0650975242853385	3.32303757194929	0.727881235240276	0.493453822603528	0.881197743192591	-5.39746491445457
Q9UPN7	PPP6R1	0.0719055690318169	3.32242738280674	1.87832068132217	0.108213742381243	0.815361488070325	-5.39791601164216
Q8WXD5	GEMIN6	0.0625130279085212	3.36633324355184	1.64912033353065	0.149005171100172	0.832891722183645	-5.3979439136512
Q9Y2F9-1	BTBD3	0.0601226631273013	3.3403486556394	0.516103193600031	0.623805811239217	0.910605644699869	-5.39797932713346
Q96GP6-1	SCARF2	0.0713323004924493	3.30152301141294	1.43997307784224	0.198768201744219	0.843583188266447	-5.39806329868714
Q5TC12-1	ATPAF1	0.066629936422423	3.38593907082952	1.33382404144433	0.229527562166197	0.844697015986012	-5.3986579853552
O96013-1	PAK4	0.0599328957166933	3.30627255568744	1.75771346951627	0.128092011586477	0.831600473975754	-5.39931597747671
Q6L9W6	B4GALNT3	-0.0567498506353105	3.29691454881773	-0.653524063033244	0.53707064415853	0.887276488207851	-5.39939215529636
Q96LD8	SENP8	0.120466689840253	3.32496322713228	1.19421414457417	0.276408396474098	0.853779374610611	-5.39962871815391
Q9NPF2-1	CHST11	0.0671944772751179	3.32033593561778	0.851532144470294	0.426379598826208	0.868823055137944	-5.40002148766783
Q13546	RIPK1	0.0552341149411703	3.31581034537907	2.00502009518255	0.0906208377989786	0.808487494800536	-5.40069762504865
Q56NI9	ESCO2	-0.089558169704944	3.27129141176949	-1.94128887123367	0.0990805929990735	0.809378699915685	-5.40088021210595
P10586-1	PTPRF	-0.0762214465200432	3.28624666278547	-2.12571351534124	0.0765434076306858	0.800257563648142	-5.40094713030194
Q9Y242	TCF19	0.0238793181671058	3.39719976229068	0.185764068525199	0.858605226729668	0.965727790778732	-5.40146623820021
Q8TBZ6	TRMT10A	0.0485983636456763	3.29803249983892	1.60414400880983	0.158595176995663	0.836564269909247	-5.40180106886493
Q7RTN6-1	STRADA	0.0606204872215949	3.28826523434479	1.41894243332648	0.204546881368783	0.844697015986012	-5.40196360663257
Q0VDG4-1	SCRN3	0.0851022566037769	3.38610951978082	1.57131817777075	0.16596158159866	0.837706900464479	-5.40265111055721
Q49B96	COX19	0.0835300363899217	3.34119329028529	1.55095014670508	0.170693546500737	0.837706900464479	-5.40333094840735
Q9UIF7-1	MUTYH	-0.0745845222566803	3.29247398784993	-1.59809350189044	0.159929251904587	0.837291765268884	-5.40467374359693
P49406	MRPL19	0.0783127299117148	3.37988485298139	1.75210920241397	0.12909792597536	0.831977927427241	-5.40566188542594
P17275	JUNB	-0.0682989656329255	3.36039958703949	-0.881813321909317	0.411011231716316	0.864295639524382	-5.40580402097097
Q99708-2	RBBP8	0.0513352794102386	3.3169425631992	2.00295666366453	0.0908830297227386	0.808487494800536	-5.40593031866241
Q9BWC9	CCDC106	0.0923848076093044	3.34728680823333	0.697353111479799	0.511068490734047	0.882302947037524	-5.40654204919105
Q5T3J3	LRIF1	-0.118205152063233	3.31281306766535	-1.92381546416155	0.10153513748456	0.809378699915685	-5.4066987328323
Q9NWZ8	GEMIN8	0.0821247831825404	3.35771542845535	1.63614989898463	0.15171245679624	0.832891722183645	-5.40685178050565
P55082-1	MFAP3	0.0257916820384426	3.29991676005242	0.231304621119911	0.824581565787815	0.956486677538005	-5.40793356834389
Q92800-2	EZH1	-0.0705302027659588	3.27292729658916	-1.12052012159324	0.304328447775086	0.858059114626327	-5.40924763326857
Q6PJ61	FBXO46	-0.144361624964419	3.3284711735183	-0.952161712745092	0.376918795634673	0.860794837423064	-5.40930125379913
Q9UC06	ZNF70	-0.108911053628419	3.33761811074868	-1.21821426761113	0.267800569698428	0.852706474028304	-5.40930524141191
Q8N4B1-4	FAM109A	0.0690717665444523	3.33118049613237	0.94883998990097	0.378478061939882	0.860794837423064	-5.40944267502625
Q9NRR6-1	INPP5E	0.0593700085611649	3.28966282568723	1.35640719305586	0.22264498504055	0.844697015986012	-5.40983388702625
Q9UPS6-1	SETD1B	0.058071360184243	3.3234177185408	1.92315351324453	0.101629307180342	0.809378699915685	-5.41018345835517
Q9Y6Q3-1	ZFP37	-0.0855253934058882	3.31689774787543	-1.31167319514075	0.236462461401087	0.844697015986012	-5.41171962094213
Q9H6A9-1	PCNXL3; PCNX3	0.0626862535409582	3.29425203117062	1.18789842307685	0.278712662120906	0.853779374610611	-5.41184548910455
P20337	RAB3B	0.18779686218776	3.23240684309504	0.763624562426828	0.473356396635869	0.876454797415721	-5.41194578574446
Q9UKY4-1	POMT2	-0.371187409968887	3.2706084170617	-0.996332164039706	0.356657440499228	0.860794837423064	-5.41239222078851
Q9NQS3-1	PVRL3; NECTIN3	0.0836122246385826	3.33157752014212	1.69330011688212	0.140127003451636	0.831977927427241	-5.41372040675559
Q86X52	CHSY1	0.0670187056121774	3.3076086574691	1.79795783996298	0.121089888557704	0.826466793981307	-5.41424219630441
Q6UWL2-2	SUSD1	0.0666427174641708	3.28197730639697	0.575127753843222	0.58561460848559	0.896873668259394	-5.41492453805233
O43182	ARHGAP6	0.0515315693616046	3.29688453927231	1.96471698283654	0.0958823826865134	0.809378699915685	-5.41621296971943
P82664	MRPS10	0.0757289605419486	3.36246521783576	1.72615185751794	0.133858113184199	0.831977927427241	-5.4167934719174
P36404	ARL2	-0.107861316538843	3.37710976199978	-1.5934908376269	0.160951213475975	0.837511648440124	-5.41690741666408
Q9UL12	SARDH	0.0764282872949064	3.41628834589718	0.915487598075678	0.394411309451716	0.860969345411323	-5.41711350614033
A0AVK6	E2F8	0.0559455882429327	3.38159937363941	1.47342560745087	0.189884546431056	0.843044435412976	-5.41749884645186
O75044	SRGAP2	0.0694661604764345	3.31058057803971	2.10051340111421	0.0792869305999079	0.800257563648142	-5.41782872282687
Q8IYU8	EFHA1; MICU2	0.0638600197084952	3.32969165575088	1.61287413397409	0.156688886378799	0.836128786680491	-5.41824194639629
P09958	FURIN	0.0306941816250098	3.30365938582504	0.297135461532653	0.776143535909383	0.949366473270817	-5.41847069703305
Q8TAP9	MPLKIP	0.0615031523940841	3.34458347313733	0.848989787751621	0.427688913092303	0.868823055137944	-5.41863849764155
O94915-1	FRYL	0.048285390558986	3.31945145678282	2.2452676787062	0.0647916146046528	0.794145183792996	-5.41894160364759
Q9NX61	TMEM161A	-0.0770850375951226	3.30782462429401	-1.0252277133199	0.343875858092883	0.860794837423064	-5.41964445430434
Q9BT67	NDFIP1	0.0703481803281521	3.30554720749771	0.970215467191516	0.368531254514313	0.860794837423064	-5.41966231876758
Q9H840	GEMIN7	-0.20271536353221	3.46321170738742	-0.660592056736118	0.532821282570641	0.887061881193586	-5.41968574993053
P53804-1	TTC3	-0.0666773681735482	3.25833380578799	-1.74867972495472	0.129717274792861	0.831977927427241	-5.41994183269158
Q9C0D3	ZYG11B	0.0612393731512557	3.31095589144303	1.93055590340728	0.100581177696402	0.809378699915685	-5.42002943854401
O43674-1	NDUFB5	0.215628061085792	3.32744639479099	1.75179230348757	0.12915503563528	0.831977927427241	-5.42145441545242
O75964	ATP5L	0.154592803359623	3.34400320228885	1.6451119027854	0.14983686862054	0.832891722183645	-5.42171425869935
P23378	GLDC	0.0866497937389953	3.38198364232433	1.97001117849835	0.0951741033058067	0.808544042593152	-5.42241186538491
Q9UKE5-4	TNIK	0.047062307862417	3.31384174461656	1.95261057310297	0.0975219356980944	0.809378699915685	-5.42307407752916
Q9H9Q4-1	NHEJ1	0.0827586186019841	3.31856542941525	1.61172895866878	0.156937697418705	0.836128786680491	-5.42337927152371
Q6ICB0	DESI1	-0.309708866177436	3.45744242649727	-0.84058865095274	0.432036437421133	0.868823055137944	-5.42388034387304
Q9BSR8	YIPF4	-0.102241466791006	3.3230432298535	-1.00142345535545	0.354378336607099	0.860794837423064	-5.4240786424912
Q96LL9	DNAJC30	0.070188582433247	3.33501858236255	0.849239335266123	0.427560265749312	0.868823055137944	-5.42412683328144
Q96B77	TMEM186	0.0823160442882481	3.33486097982021	1.21863710881391	0.267651009187882	0.852555908517457	-5.42423561585379
Q08426	EHHADH	0.060906759907153	3.30450760977938	0.749075425526766	0.481468002002886	0.878615863549925	-5.42465251763184
A2RUB6-1	CCDC66	0.0778297094458788	3.33348267676495	0.952695144672872	0.376668859714795	0.860794837423064	-5.42465497279005
Q7Z6J6-1	FRMD5	0.0796568672573387	3.29298736313608	1.48575235264338	0.186704549752585	0.842176722648431	-5.42478800221276
Q9Y462-3	ZNF711	0.064773112525113	3.28104080862548	1.49917964626429	0.183296874191805	0.842176722648431	-5.42654446181608
Q96S44	TP53RK	-0.0583158107990154	3.32635798346871	-1.58233642499039	0.163453627367714	0.837706900464479	-5.42687112340391
Q9C0D5	TANC1	0.0609773205767581	3.31085381782735	2.00608239630968	0.0904861525525886	0.808487494800536	-5.42747227611429
Q6QNY0	BLOC1S3	0.0552264032056727	3.33245457955368	1.58283610691845	0.163340743943398	0.837706900464479	-5.42804292366696
Q8WXX7-1	AUTS2	0.0580947359931757	3.30758982133446	1.66946891173371	0.144850873364722	0.832891722183645	-5.4283513798656
O75896	TUSC2	0.137793356063248	3.30129447456536	0.932619355292143	0.386164028347025	0.860794837423064	-5.42878752756385
P35626	ADRBK2; GRK3	0.0595411666119514	3.33689849403051	1.97102467501703	0.0950391129214757	0.808544042593152	-5.42958659363063
Q9BQ83-1	SLX1B; SLX1A	0.0683929330151751	3.29486597822811	0.925376057613987	0.389634712200484	0.860794837423064	-5.42992646472786
Q6FIF0	ZFAND6	0.125695579640499	3.30174394147435	1.66756032442868	0.145235751470527	0.832891722183645	-5.43045118083536
O14548	COX7A2L	0.0828776640480045	3.35567711226867	1.42049262636703	0.204115739006182	0.844697015986012	-5.43102158550947
Q9P2B4	CTTNBP2NL	0.0704730906092732	3.32012150628718	2.001937546087	0.0910128064527241	0.808487494800536	-5.43102772853034
Q9Y314	NOSIP	0.0978214222856083	3.30857117003512	1.82050260314061	0.117332627180792	0.82130239854684	-5.4314817211083
Q5BJD5-1	TMEM41B	0.0732209354622214	3.31765232226884	1.28438176870407	0.245262121238864	0.844697015986012	-5.431782132559
Q99547	MPHOSPH6	0.0831423088316293	3.32665544818117	1.73915425382413	0.131452735867452	0.831977927427241	-5.4323032492254
P52758	HRSP12; RIDA	0.0630136672089806	3.36466151122316	1.42771112522709	0.202119034146268	0.844697015986012	-5.43268283866766
Q7Z3B4	NUP54	0.057245749304534	3.30938100092963	2.16516435950725	0.0724414654589765	0.798946025571133	-5.43270530250084
Q6PI48	DARS2	0.129802793204992	3.34281454113213	1.99579727073156	0.0917986789453499	0.808487494800536	-5.43337238346154
Q9H2B2	SYT4	0.0877520963521172	3.39888578257163	1.56194450012243	0.168123747146259	0.837706900464479	-5.43430923740583
Q96K21	ZFYVE19	0.0495881958653978	3.32255142908799	1.6809575393463	0.142554750822713	0.832891722183645	-5.43470614267568
Q8N448	LNX2	0.0832540857724814	3.33362319910158	0.886750359989553	0.408545190674707	0.864295639524382	-5.43729027608728
A5PL33	KRBA1	0.0490637262037111	3.3387562795007	0.494147135958545	0.638353625817705	0.914909099619697	-5.43741881916954
Q8NI08-2	NCOA7	0.0554147582870632	3.32144462156506	1.99570483212974	0.0918105618507779	0.808487494800536	-5.43790289730281
Q5T890-1	ERCC6L2	0.0683157693045741	3.28805676406928	1.50359796181185	0.182188261385909	0.841841449350234	-5.437943604682
Q96ER9	CCDC51	0.146219445740587	3.34894586345294	1.76288593686745	0.127170381226883	0.83071529676436	-5.43836666862142
P18077	RPL35A	-0.446010038163777	3.24665501910546	-1.97310864797258	0.0947621458645714	0.808544042593152	-5.43965050573596
Q86YW9-1	MED12L	0.0539383488583472	3.31121867503891	0.694272728527008	0.512868660880701	0.882302947037524	-5.44171844040106
Q9GZU1	MCOLN1	0.0555869955832267	3.28752375442145	0.506869064057188	0.62990227179894	0.912068935579551	-5.44179690656139
Q96A47	ISL2	0.0693000170121118	3.30182358917715	0.946695160079733	0.379487529174446	0.860794837423064	-5.4418369942531
Q9NTG7	SIRT3	0.0699081342373366	3.36182718071667	1.33119299692712	0.230341675449994	0.844697015986012	-5.44263487083189
Q8IWC1	MAP7D3	0.0675928786189692	3.32299536960628	1.56229745495004	0.168041854585821	0.837706900464479	-5.44264281421194
Q13442	PDAP1	0.0904033106364827	3.29409396506632	2.05632851331997	0.0843409967547754	0.800328542096179	-5.44287853889995
Q9H3C7	GGNBP2	0.0647923964802055	3.29213282575615	1.48315066612375	0.187371585265358	0.842176722648431	-5.44374078105281
Q9BZR9	TRIM8	0.0748866665013502	3.33531178588601	0.98200369948762	0.363133866098904	0.860794837423064	-5.4448260873177
Q8IWL3	HSCB	0.0874796398886719	3.40020342285358	1.60850336030937	0.157640540474284	0.836128786680491	-5.44568762341456
Q9H2X6-1	HIPK2	0.0548465674766809	3.29883560570766	0.603521247728623	0.567738127560574	0.891586184163156	-5.44581755154041
P49641	MAN2A2	0.181469769852631	3.27952446425374	1.11754724416623	0.305502797496379	0.858059114626327	-5.44608038982041
Q6ZTN6-3	ANKRD13D	-0.00585335649182749	3.38322734824693	-0.0406574189328046	0.968856768226696	0.990603461294951	-5.44612421811033
Q9Y5Y5-2	PEX16	0.0605462442348918	3.30943800215084	1.41053025828833	0.206901017026306	0.844697015986012	-5.44635460595597
Q9HBH5	RDH14	0.123779342610802	3.29981325296424	1.67056991757773	0.144629294724724	0.832891722183645	-5.44652943704801
Q9UGI0	ZRANB1	0.0763759040138244	3.31890991983475	0.917851157029717	0.393265557269903	0.860794837423064	-5.44686413580367
Q5EBL2	ZNF628	-0.0355011581042725	3.33971010028453	-0.287569813019678	0.783120188973306	0.950056204455666	-5.4473365179845
O00327-2	ARNTL	-0.0337400671962063	3.33124957868389	-0.316866882972819	0.761824912771127	0.943805579291217	-5.44779066619699
Q4ADV7	KIAA1432; RIC1	0.0699164266603582	3.30926005413401	1.37005736246379	0.218575334550563	0.844697015986012	-5.44941859192099
Q8WVZ9	KBTBD7	0.0552624306121694	3.32463074710503	1.69974994931967	0.138874249740884	0.831977927427241	-5.45022265699332
P27815-1	PDE4A	0.0886378349465371	3.31028374124784	1.44499719863475	0.197410032240552	0.843173051975301	-5.45082967307465
Q13772-4	NCOA4	0.0617585093656815	3.34736363603734	1.5216999675599	0.17771113309016	0.841841449350234	-5.45089987721477
O95718-1	ESRRB	0.0380139307576422	3.30848334503282	0.294321124336374	0.77819382993066	0.949554263602765	-5.45205175992309
Q14241	TCEB3; ELOA	-0.161269071559775	3.23365075317188	-1.93587829729932	0.0998342342618588	0.809378699915685	-5.45257622632218
O94844	RHOBTB1	0.0698398272330707	3.3560792236787	0.845561861241914	0.429458957066363	0.868823055137944	-5.45290326322718
Q7Z434	MAVS	0.0911106451639473	3.34543842978448	1.78743287920712	0.122884119735058	0.827456862194641	-5.45296137859847
Q9Y2K6	USP20	0.0524393648918073	3.30598331429504	1.55617765896199	0.169467103567995	0.837706900464479	-5.45318306495128
Q9BZ29-4	DOCK9	-0.0993208487457513	3.30025729287553	-1.14367302105728	0.295311170114139	0.858059114626327	-5.4536343686559
Q9P2G1	ANKIB1	0.0662966622913233	3.32600437389774	1.49603122408941	0.184090678566206	0.842176722648431	-5.45384184133412
P17707-1	AMD1	0.0666006772375807	3.3966664687857	1.3534923761801	0.223522789935083	0.844697015986012	-5.4538594679798
Q6P2H3-1	CEP85	0.0589281302380835	3.33342786279899	1.87668964905686	0.108461110702972	0.815361488070325	-5.45418837513893
Q9H972	C14orf93	-0.0727887679362904	3.3512350868033	-1.31160406988984	0.236484391539496	0.844697015986012	-5.45432233879828
O75467	ZNF324	0.0543319621891734	3.28022905426005	0.746542261798491	0.482890016038852	0.880316299292276	-5.45435493172333
P56277-1	CMC4; MTCP1	0.0539749382809153	3.33783852779827	1.26554204600328	0.251503968275476	0.849130999380513	-5.45468929552321
Q5T1V6	DDX59	0.0679543966944292	3.31417795473209	1.84284228148835	0.113722706349304	0.819353915408639	-5.45551077406631
O15379-2	HDAC3	0.0543222939135087	3.31829512016791	1.65566726297726	0.147656264661979	0.832891722183645	-5.45618711964523
P33908	MAN1A1	0.0846366609714056	3.32425107886823	1.72808341395915	0.133498102896594	0.831977927427241	-5.45625080779511
Q68DC2-4	ANKS6	-0.0475001712597249	3.28780519353384	-0.478887876388873	0.648569113926994	0.91711696421776	-5.45630975357751
Q9H8G1	ZNF430	0.0627465297900737	3.31667224660818	0.735879113994794	0.488907303685357	0.880707364592196	-5.45642843290722
P04198	MYCN	0.0569582075303056	3.4203787486874	1.73798949053708	0.131666488338166	0.831977927427241	-5.45651406237144
P49759-3	CLK1	-0.0634857918206316	3.3326365803082	-1.81125726678854	0.11885938117939	0.822330490088492	-5.45758856249359
Q8NC44	FAM134A; RETREG2	0.0618798487238847	3.30388165027999	0.666269215106767	0.52942366161432	0.886652525613736	-5.45759602928253
Q93015-2	NAT6	-0.00261046843689897	3.35350115325906	-0.0202306850137049	0.984499735956784	0.994159878732375	-5.45798008734129
Q9P2P5	HECW2	0.0715722507687107	3.30666078622653	1.82495521318657	0.116604229013525	0.82130239854684	-5.458199484667
Q70CQ4-1	USP31	-0.0774446937813725	3.31292131800713	-1.12521711444312	0.302480719099919	0.858059114626327	-5.45859165200323
Q9NPH0-1	ACP6	0.0671285080780137	3.32879392589596	1.06325698792773	0.327618102019925	0.85949918260972	-5.45907897105229
Q9Y328	HMP19	0.0567275295175479	3.32945527377401	0.55588748202513	0.597913470977961	0.901399733691288	-5.45980642758902
Q5JU69-1	TOR2A	-0.02351952912737	3.26332818187493	-0.210856342768629	0.839812318119824	0.96126954866839	-5.46022775648015
O15131	KPNA5	-0.0581648222169135	3.32344078080967	-1.01484517775854	0.348425621609957	0.860794837423064	-5.46044491477831
Q92185-1	ST8SIA1	0.0427146620696409	3.32484902478324	0.449940210477879	0.668177806296171	0.922173873060411	-5.46060536414309
Q9UHW5-2	GPN3	0.0535939926675472	3.31552248435097	1.39796801034729	0.210462520677414	0.844697015986012	-5.46095444404217
Q6PCB6	ABHD17C; FAM108C1	0.0560458814999188	3.34470419966489	0.702830585794511	0.507877747646853	0.882302947037524	-5.46095849740137
Q8IXI1	RHOT2	0.108395280917345	3.33395920852388	1.84149245489155	0.113937686422123	0.819486241600357	-5.46141074092932
P78504	JAG1	0.0348545075815254	3.34601880273506	0.32707901863094	0.75445393812446	0.940589990835539	-5.46145804744871
Q7Z3E2	C10orf118; CCDC186	0.0916487374287956	3.33394643282588	1.75840960659082	0.127967595781378	0.83144027937145	-5.46234322316124
Q96KQ4	PPP1R13B	0.0638676973583499	3.32292074843348	1.47217940969917	0.190208809034529	0.843173051975301	-5.4623861118516
Q6T4P5-3	LPPR3; PLPPR3	-0.0973772872714514	3.32534841553946	-1.19307907154113	0.276821316795898	0.853779374610611	-5.46288200334175
Q9NWU1-1	OXSM	0.0680089697520807	3.38027659827393	1.59591636297401	0.160411888059641	0.837291765268884	-5.4630572064273
Q86VZ6	JAZF1	0.0685351404476268	3.32742301009692	1.00635234748175	0.352182967919186	0.860794837423064	-5.46306549236429
O60513	B4GALT4	0.0633285346352811	3.33454423353068	1.46134338633898	0.193049997936236	0.843173051975301	-5.46385062230497
Q9H3J6-1	C12orf65	0.100671104660935	3.29690804468804	1.34952481808026	0.224722626019007	0.844697015986012	-5.46392477581622
P08138	NGFR	0.0666486667831224	3.33703567928258	0.918334056901549	0.393031780446255	0.860794837423064	-5.46489359272395
O95379-4	TNFAIP8	0.0735687255038097	3.33298624456481	1.52260988898362	0.177488817377049	0.841841449350234	-5.4650197346875
Q7M4L6-2	SHF	0.0567634866824388	3.36163203926065	1.28944649226519	0.243607543524446	0.844697015986012	-5.46567646232935
Q58EX7	PLEKHG4	0.0697063782972065	3.31089838137095	1.0320077134679	0.340930599619824	0.860794837423064	-5.46618040040027
Q99457	NAP1L3	0.0602211637144663	3.37922380822421	1.27139409775838	0.249550333259709	0.849130999380513	-5.46651078845008
Q9Y4K0	LOXL2	-0.0619105306799258	3.30571026283244	-0.672873335516465	0.525488780866995	0.885302036642536	-5.46654964724315
Q6PJT7-5	ZC3H14	0.0537618486811758	3.30615356903101	2.11644169609733	0.0775414006081881	0.800257563648142	-5.46705187713904
P17931	LGALS3	0.0562194026442034	3.39682738491195	0.408490479004972	0.696755921328425	0.931740358587544	-5.46830451332703
Q9P2H5	USP35	-0.275733332347249	3.28428943579643	-1.16243463165473	0.288170064009728	0.854601857528813	-5.46837342244158
Q7Z3I7	ZNF572	0.0643125777968514	3.30649009440163	0.75810528449233	0.476422390344583	0.877498284623617	-5.46866864719457
Q16526	CRY1	0.0609175216071941	3.34969739736304	1.59688242807753	0.160197556990629	0.837291765268884	-5.46924544996082
O96015	DNAL4	0.0614738877439589	3.29988228161743	0.85527293674336	0.424458443787709	0.868823055137944	-5.46935219626017
Q8N163-1	CCAR2; KIAA1967	-0.0309174847349375	3.31596905711061	-2.47785905452319	0.0469748047045419	0.769518669884973	-5.47083308691763
Q9Y3B8-1	REXO2	0.0752303436216629	3.32899985725338	1.6682731469783	0.145091891742486	0.832891722183645	-5.47159147773265
Q9UBS9-1	SUCO	0.0546258605847264	3.35401585880171	1.55923140716558	0.168754494829372	0.837706900464479	-5.47228517360288
Q9UNL2-2	SSR3	0.0770632323845166	3.3219561604894	1.13004412434935	0.300591628064795	0.858059114626327	-5.47235848559083
Q9HAW4	CLSPN	0.0719576435787364	3.31853401694694	2.12137014910644	0.0770092750554274	0.800257563648142	-5.47264067780507
Q8IYD8	FANCM	0.0573339274286659	3.336475735549	1.57606606925007	0.164876450501884	0.837706900464479	-5.47284397446406
Q7Z6J8	UBE3D	-0.0556334107599069	3.30208633769357	-1.57436386998593	0.165264715742365	0.837706900464479	-5.47310104038364
O00748	CES2	0.0518596935074143	3.31839159989087	0.730467618523603	0.491980439478102	0.880710325399991	-5.47324778847359
Q9H469	FBXL15	-0.175383688995504	3.39778661551397	-0.961594992128969	0.372517864513819	0.860794837423064	-5.47353671249259
Q8TDG4	HELQ	0.0859826270787063	3.25022523503544	0.900297198432275	0.401835596339438	0.863398800063926	-5.47371377537237
Q92993-3	KAT5	0.0739774982529925	3.28138903140461	1.7002986842537	0.138768169115432	0.831977927427241	-5.4737258090942
Q9NVV0	TMEM38B	0.00398037456320583	3.32131778008314	0.0335113373551311	0.974327969586794	0.991941443501493	-5.47379090260102
Q2M2Z5	PLK1S1; KIZ	0.0724656073235384	3.31846315031362	1.46802133717484	0.191294452270475	0.843173051975301	-5.47398668670773
Q9Y285	FARSA	0.0471513880205536	3.32143827220151	1.95470963823429	0.0972356643016479	0.809378699915685	-5.47400260950337
O95455	TGDS	0.0749355177757698	3.31309489267757	0.916873265575469	0.393739289238741	0.860794837423064	-5.47400727062176
Q96AX9-14	MIB2	-0.0587594345903524	3.31987265741512	-1.63251032751395	0.152480540658074	0.832891722183645	-5.47429064549335
O60524	NEMF	-0.0365319162656645	3.29675321936524	-1.95113891480914	0.097723143845158	0.809378699915685	-5.47461673534183
O95232-1	LUC7L3	0.0325718201706054	3.32382989001396	2.22678971759449	0.0664791987047192	0.795839304749665	-5.47488559306742
Q9UGM6-1	WARS2	0.105857321320083	3.3404669802551	1.39846882413045	0.210319475425414	0.844697015986012	-5.4760864767588
Q9P1Q0	VPS54	0.0509447582279848	3.31239508340502	1.4812922458478	0.187849409283192	0.842794766299619	-5.4762685600332
Q9ULR3	PPM1H	0.0519907276227597	3.34126816232973	1.4176634448624	0.204903221768622	0.844697015986012	-5.47689949864132
Q9UHB7-1	AFF4	0.0470267728706836	3.31321694980051	1.98695783714247	0.092942006053108	0.808487494800536	-5.47693921829158
Q5JVL4	EFHC1	0.00599502437554171	3.3266285071276	0.0601778495024712	0.953921852652066	0.987966968320157	-5.4772288018598
P62079	TSPAN5	-0.00370555363478089	3.34623387701638	-0.0336066515717113	0.974254984127974	0.991941443501493	-5.47777049554173
P17097-2	ZNF7	-0.0699716072365804	3.29560517644441	-0.670481979785145	0.526911425510023	0.886300891489447	-5.477941546467
Q9UEU0	VTI1B	0.0629201043835664	3.31713583470784	1.43921385820077	0.198974185855336	0.843583188266447	-5.47839223979364
Q02086-1	SP2	-0.055425764933405	3.27857830412117	-1.50966560400099	0.180675979854779	0.841841449350234	-5.47935450321716
P35711	SOX5	0.0507625407347318	3.31136613974741	1.80995224568684	0.119076455538192	0.822639520761428	-5.47954936682413
P36776	LONP1	0.124475846609659	3.359453400795	2.15840691883546	0.0731277892405203	0.798946025571133	-5.47969594682446
Q9ULD0	OGDHL	0.116806898151829	3.3408810733468	1.35385854520859	0.223412346628963	0.844697015986012	-5.48065134657362
Q9Y6M7-13	SLC4A7	0.0688654678785138	3.31560592498525	1.86566291634645	0.110148223431475	0.817198122281546	-5.48079657282394
P50416	CPT1A	0.0995448631190293	3.33215783329531	2.14300000043613	0.0747175816249389	0.800257563648142	-5.48118553437524
Q15528-1	MED22	0.0707713426884953	3.31955033371084	1.52973745574943	0.175756354560022	0.841841449350234	-5.482650386351
Q7Z698	SPRED2	0.0522810222907307	3.33594083263306	0.631985870330411	0.550151167078286	0.891362512879415	-5.48298592365849
P13473-3	LAMP2	0.0716241317050105	3.33506569756824	1.03654865144132	0.338969381193477	0.860794837423064	-5.48344705410578
P47985	UQCRFS1	0.186106036138357	3.34868740588469	1.62838893094591	0.153354788161918	0.832891722183645	-5.48414653874698
Q9NW13-1	RBM28	-0.179906070345784	3.22038424726006	-2.02475462450609	0.088151426198312	0.808487494800536	-5.48551880672456
P51649-2	ALDH5A1	0.116692025257499	3.35150212920982	1.58723356466397	0.162350487089948	0.837706900464479	-5.48563570676691
Q96CG8	CTHRC1	0.0609301867511287	3.31908482962204	1.31716112560705	0.234727159658756	0.844697015986012	-5.48622843502209
Q8TB03	CXorf38	0.0442507304781684	3.33985419049201	1.66092007349408	0.146582462637773	0.832891722183645	-5.48628774209205
P10276	RARA	0.0533113144289628	3.37615510628556	1.32878392761931	0.23108936427655	0.844697015986012	-5.48655356658613
Q9UHY8-2	FEZ2	0.0654990262080873	3.30914988082598	1.24580746217422	0.258191158459979	0.849130999380513	-5.48734755948316
Q6ZSY5	PPP1R3F	0.0512979463260513	3.30617665206267	0.526630244001115	0.616895160084913	0.908603724078954	-5.48760343439446
Q6NTF9-2	RHBDD2	0.064191159052639	3.27480161186957	0.76165041057288	0.474451478747365	0.876454797415721	-5.4889062027287
O43805	SSNA1	0.0629119371152553	3.32524908123999	1.40282564362583	0.209078779315495	0.844697015986012	-5.48943119699414
Q96HC4	PDLIM5	0.0523609757529864	3.32298529261834	1.70683354326385	0.137510860689854	0.831977927427241	-5.4898022695183
Q13415	ORC1	-0.0735489765437338	3.26716980626405	-1.45807707007181	0.19391407073292	0.843173051975301	-5.4899179650707
Q8TD31-2	CCHCR1	-0.045292883046665	3.29546880504792	-0.468367592221806	0.655661073115548	0.917521830663656	-5.49068445893135
Q9BRG1	VPS25	-0.114177527876389	3.33653194439553	-1.6804329757052	0.142658823221136	0.832891722183645	-5.49141862030541
Q96P53	WDFY2	0.0624802696152969	3.32384040841525	1.30752262686524	0.237782443704402	0.844697015986012	-5.49233507204431
P42702-1	LIFR	0.0497996006807576	3.31267117772372	1.6259573795288	0.15387281910081	0.832891722183645	-5.49285929670518
Q8TEX9-2	IPO4	0.0607763444425947	3.30998309842082	2.01279791895476	0.0896393693030056	0.808487494800536	-5.49295358364444
Q9H4K7	GTPBP5; MTG2	0.0492623517442069	3.36205220350361	1.63116014415214	0.15276642198489	0.832891722183645	-5.49318410162793
Q1ZZU3	SWI5	-0.00306985872876972	3.29191912945097	-0.0266936328118441	0.979549182485521	0.992768630419368	-5.49438633524626
Q9NRA0-5	SPHK2	0.0268379866602565	3.3148147353708	0.282893065043775	0.786539214959637	0.950056204455666	-5.4949056230478
Q5VT66-2	MARC1	0.0755500315948801	3.33435998709276	1.25783257952965	0.254098128684077	0.849130999380513	-5.49557219558857
Q9BSA4-1	TTYH2	0.0638269293632587	3.31717686764152	0.850061723024539	0.427136507187349	0.868823055137944	-5.49672894706506
Q969Q5	RAB24	0.0519564477833752	3.33108132636134	1.51314578552223	0.179813876138532	0.841841449350234	-5.49701431427932
Q16822-1	PCK2	0.0743216506207047	3.38426129606024	1.93053912140173	0.100583541678804	0.809378699915685	-5.49734680589419
Q9NWB6	ARGLU1	-0.0729089242931238	3.31309083971222	-1.69996536301782	0.138832596951287	0.831977927427241	-5.49740732638888
Q9Y3V2-1	RWDD3	0.0738857305689432	3.32360507726517	1.15532225523485	0.290859827225152	0.854845609140163	-5.49863394256097
Q02641-1	CACNB1	-0.0541156921453193	3.31784226942432	-0.687435145752806	0.51687937146826	0.882302947037524	-5.49870039046527
Q6PID8-1	KLHDC10	0.0623570375670518	3.34833926406483	0.690323576870178	0.515182615522441	0.882302947037524	-5.49943379415385
Q8WUH2	TGFBRAP1	0.0554330240958481	3.30798424391339	1.73683868264986	0.131878011367208	0.831977927427241	-5.49950546706697
Q86XA9	HEATR5A	0.0487282249993446	3.32640725590279	2.04861922940076	0.0852557276129327	0.800328542096179	-5.50085502061618
Q9HD34	LYRM4	0.068548091843228	3.32961260225415	1.21904083424576	0.267508277331665	0.852555908517457	-5.50115724766563
Q8NEJ9	NGDN	-0.0900460667965878	3.26304272611789	-1.75283869306052	0.128966554887211	0.831977927427241	-5.50134709570851
P11362-21	FGFR1	-0.133331946337086	3.34449581349039	-1.50127451633181	0.182770464035912	0.842176722648431	-5.50154592722279
Q68DQ2	CRYBG3	0.0624984946588997	3.31525038822283	1.50317186035539	0.182294903335143	0.841841449350234	-5.50177927523477
Q13099-1	IFT88	0.0512483247060823	3.30968709863722	1.86701458752652	0.109940025718635	0.817198122281546	-5.50191953344656
Q9BVS4	RIOK2	0.0822069302344486	3.32193646930645	1.77646250450369	0.12478197512152	0.829373171398803	-5.50196514595575
Q7Z7L9-1	ZSCAN2	0.068031233887034	3.34697545568803	1.17111641178287	0.284915389986517	0.854601857528813	-5.50201113604042
Q8WVR3	C7orf43	0.0521720895753048	3.31252135455657	1.32332878440935	0.232790453856253	0.844697015986012	-5.50255058764064
P52746	ZNF142	-0.0616506556552007	3.29689097246731	-1.51586117179871	0.179143891931359	0.841841449350234	-5.50267581327154
Q9NRA2	SLC17A5	-0.151360406927533	3.28832069420857	-0.914758522479228	0.394765246530795	0.860969345411323	-5.50447339486404
Q96HY6-1	DDRGK1	0.0657491874932813	3.33427363485867	1.19890766311553	0.274706574510089	0.853779374610611	-5.50467811157372
O60658-1	PDE8A	0.0661520988668917	3.32765179156053	0.870525023652662	0.416691442484975	0.867684093539345	-5.50488344736306
Q7L622	G2E3	0.0549739785652764	3.39807015373852	1.48411308385353	0.187124578016627	0.842176722648431	-5.50489328997928
P55345-1	PRMT2	0.0607525167037119	3.29962548648459	1.12146723415031	0.303955110503629	0.858059114626327	-5.50503616347326
Q9BWH2	FUNDC2	0.0970483371288176	3.33486549329983	1.450113180613	0.196035796089192	0.843173051975301	-5.50530310768691
Q96IK5	GMCL1	0.0563669852914818	3.2738276895624	0.868205728479941	0.417865690284244	0.867684093539345	-5.50555823514156
Q9HC77	CENPJ	0.0602263782403683	3.34741916542766	2.00347985017547	0.0908164783442245	0.808487494800536	-5.50624378299216
P27037	ACVR2A	0.0618338806954243	3.38421378672996	1.04290865697086	0.336237832605397	0.860794837423064	-5.50628378976553
P05937	CALB1	0.0752166314116233	3.36364402454742	0.827876811616076	0.438675806131904	0.869779371783615	-5.50713412477313
Q8IYA6	CKAP2L	-0.107158677424304	3.24127163795986	-1.7255511531811	0.133970266365725	0.831977927427241	-5.50793108467915
Q9Y6M5	SLC30A1	0.0760089922541037	3.31233529275318	1.43928735370401	0.198954237208794	0.843583188266447	-5.50804215643762
O95620	DUS4L	0.0376916887259629	3.34071439210959	0.354595948501559	0.734734432568311	0.937360464496414	-5.50874661583205
P41227-1	NAA10	0.0494168572968813	3.35182109079024	2.11132367948201	0.0780979595023128	0.800257563648142	-5.50881796331911
Q9Y2X3	NOP58	-0.0791146296202444	3.26568068030109	-2.22507398549115	0.0666381759495281	0.795839304749665	-5.50948937452919
Q8NC67	NETO2	0.0685101973404902	3.3439604185031	1.53548739966497	0.174370289180905	0.841841449350234	-5.51068433723247
Q9UKU6	TRHDE	-0.0226288217004765	3.34042195286251	-0.232903514303658	0.823394044583863	0.956486677538005	-5.51074776751361
Q9NPZ5	B3GAT2	0.0627499075167325	3.33881521884882	1.00630327484605	0.352204771804151	0.860794837423064	-5.51167718938565
Q5RI15-2	COX20	0.121678197762527	3.32813166637608	1.19006536179856	0.277920217545032	0.853779374610611	-5.51168582878163
P04233-1	CD74	-0.0634551023222352	3.30283557074328	-0.61990513143948	0.557573921748439	0.891562169622263	-5.51187703042239
Q9NSY0-3	NRBP2	0.0531679490705999	3.30137102488933	0.783843414294108	0.462241790957187	0.876454797415721	-5.5128774684791
Q9ULW3	ABT1	-0.0922243693693968	3.27233677554783	-1.59522702418973	0.160564990844266	0.837291765268884	-5.51320009745214
Q5T7N3	KANK4	0.0486979246648194	3.33420953192185	0.607226938474584	0.565429439386925	0.891562169622263	-5.51342311445796
Q9HBG6-6	IFT122	0.0670420224201728	3.30796946376486	1.99778147167832	0.0915439842011105	0.808487494800536	-5.51343145811294
Q9BYD1	MRPL13	0.0982746204541955	3.36129191825514	1.4211374437613	0.203936645859767	0.844697015986012	-5.51350088803702
Q5VW36	FOCAD	0.0735499333929695	3.29757449258091	1.92673705620589	0.101120547744667	0.809378699915685	-5.51374083699784
Q9Y512	SAMM50	0.164699793059051	3.33923908014417	1.92392165482587	0.101520038810993	0.809378699915685	-5.5138774875617
Q9P0T4	ZNF581	0.0521206524126988	3.33284280769294	0.496378830235985	0.636866740235198	0.914492339580153	-5.51408554105709
Q9UJW8	ZNF180	0.0328290649180768	3.34631652015157	0.274250228192517	0.792871341614615	0.950056204455666	-5.51525050730894
Q9BWL3	C1orf43	0.0817662653264215	3.32971418155012	1.40811520664927	0.207581415044733	0.844697015986012	-5.51536923454337
Q92543	SNX19	0.0572884671315752	3.33361975591971	1.10440815504363	0.310738318618944	0.858059114626327	-5.51608893436691
O60825-1	PFKFB2	0.0549846290516339	3.31194789943377	0.937126824904286	0.384016252558419	0.860794837423064	-5.51654650383383
P35268	RPL22	-0.219000072915918	3.27927760593018	-1.79754558854486	0.12115968116954	0.826466793981307	-5.51771519231349
Q9BQA5	HINFP	-0.00165942281336574	3.30577745227668	-0.0147731869876339	0.988680720671824	0.995920510350987	-5.51778577876662
Q9BUG6	ZSCAN5A	-0.0439458793960313	3.29133884235102	-0.530408155008954	0.614425422875843	0.907658674454674	-5.51807019484751
Q10472	GALNT1	0.0704820202818175	3.30492220244519	1.71323528454896	0.13628984545722	0.831977927427241	-5.51841398023302
A5D8V6	VPS37C	0.0482077565588587	3.33278584271876	0.588301553791445	0.577279493808955	0.894242225409836	-5.51868360749211
Q13503	MED21	0.162584269198125	3.31091001179704	1.06240012611439	0.327977411284407	0.859754622788306	-5.51911308179861
Q9UDY2	TJP2	0.0609268035013011	3.31554368857633	2.14046205789404	0.0749828330068151	0.800257563648142	-5.51949473020226
Q5VYJ5	C10orf112; MALRD1	-0.0110269922858704	3.3651188805434	-0.0960202176875015	0.926556954880759	0.983067821645264	-5.5195578213132
Q9C0E2	XPO4	0.0706364614947027	3.31529968791396	2.04936905826182	0.0851663190123191	0.800328542096179	-5.51972645194934
Q96PB1	CASD1	0.126134414627548	3.31342115266029	1.51767689319917	0.178697187984644	0.841841449350234	-5.52009077318525
Q9BYT3-1	STK33	0.0425650568697331	3.3210095801941	1.76392018032656	0.126986876878391	0.83071529676436	-5.52040389149781
Q8TCG2	PI4K2B	0.0550466701436767	3.32873248459399	1.53494847339274	0.174499765140075	0.841841449350234	-5.52064816270117
Q96Q11-1	TRNT1	0.0582743307838768	3.34117349405511	1.88661857347	0.10696388995366	0.815361488070325	-5.52065312945758
Q6UXV4	APOOL	0.108869305833898	3.35372952341772	1.54694105235263	0.17163977990856	0.839172554438565	-5.52119138600495
Q9Y3I1	FBXO7	0.0477524302141618	3.32808858431501	1.58736398861786	0.162321204039699	0.837706900464479	-5.52163184847817
O14933	UBE2L6	-0.178489905543896	3.4469861199624	-0.596613469124786	0.572056887277829	0.891998138569071	-5.52172479224591
Q5TB80	KIAA1009; CEP162	0.0660806710320517	3.33247061831272	1.87838226790639	0.108204412898873	0.815361488070325	-5.52172630056812
Q8NEZ3-1	WDR19	0.0484074226170686	3.3074230292431	2.02790855085835	0.0877631075560382	0.808390347610093	-5.52194182705146
P52849-1	NDST2	-0.0345088861572258	3.35398518971612	-0.291415807320427	0.780312447554649	0.950005047877254	-5.52210382973523
Q5RL73-2	RBM48	0.0337730650534987	3.29190837355219	0.303672352588487	0.771388902918098	0.947273816519641	-5.52265493095957
P32519-1	ELF1	0.0584625014089907	3.30850167722193	0.892907646879366	0.405485196706063	0.864008240978394	-5.52268930335824
Q8IYK8	REM2	0.0583730676433195	3.32065413644918	0.924011053848453	0.390291431554266	0.860794837423064	-5.52376393183231
P49842-1	STK19	-0.0599644745019537	3.34062908195639	-0.564293071714395	0.592522224413626	0.89940791749888	-5.52381337417935
O00462	MANBA	0.0551025078467578	3.30594489650681	1.68646654479042	0.141466180491251	0.83281220379595	-5.52424562431699
Q92585	MAML1	0.0603694593716764	3.33308341849696	1.65984626763333	0.146801363913786	0.832891722183645	-5.52451338907052
O60333-2	KIF1B	0.0472899064911133	3.33120870550396	2.12008669987633	0.0771474897626676	0.800257563648142	-5.52545118356312
Q6ZRY4	RBPMS2	0.0409712229671672	3.35068606140695	0.354745199941243	0.734628056102747	0.937360464496414	-5.52551037636008
Q5BJF6	ODF2	0.0666540083407501	3.32356109258884	1.83753251459441	0.114570681439002	0.821204815542148	-5.52569504811895
A1L390	PLEKHG3	0.0490995251497028	3.31771147673048	1.46751550520082	0.191426911231846	0.843173051975301	-5.52594194767272
Q5XKK7	FAM219B	0.0542190074498988	3.31550089753029	0.477301000632501	0.649636319511497	0.91711696421776	-5.52684192798871
Q9UHF0-1	TAC3	-0.12284452823623	3.36619038011446	-0.641376001047723	0.54442412856627	0.889805871496382	-5.52713353674234
A2RUS2	DENND3	0.0328304068578121	3.24893577476138	0.286424109170424	0.783957293103598	0.950056204455666	-5.52819261853503
Q9BV47	DUSP26	0.0558642804099242	3.33869295840379	0.831485243148685	0.43678365579838	0.869696789938134	-5.52948930268425
P12107-2	COL11A1	0.0547899487547545	3.31452859699013	0.548413884674372	0.602730435638327	0.90251064027494	-5.52975223695586
O75132	ZBED4	-0.0453661538965442	3.29881979573435	-1.95383960989004	0.0973542169504798	0.809378699915685	-5.5303033282517
O94952-2	FBXO21	0.0581327581824344	3.31816130467537	1.76825954543268	0.12621976095623	0.83071529676436	-5.53053283439892
Q96RR1-1	C10orf2; TWNK	0.205152623496589	3.33394691212646	1.69253242253682	0.1402768371358	0.831977927427241	-5.53056863963718
O14771	ZNF213	0.0631968774685356	3.29637002768739	0.901701698964338	0.401144743845073	0.863398800063926	-5.53083926551124
Q8IWY9	CDAN1	0.0490254206985735	3.31287810880386	1.8097328230714	0.119112992029636	0.822639520761428	-5.53088864712586
Q96A83	COL26A1; EMID2	-0.0670044188825124	3.29267714045441	-1.18447440380631	0.279968756001075	0.853808392895483	-5.53104440323679
Q13164-1	MAPK7	0.0408540569705521	3.30843490839762	1.8527447674895	0.112157781049906	0.81804545016262	-5.53177363973081
Q7Z2W9	MRPL21	0.0789808634536066	3.34342388216266	1.32502470879166	0.23226041789678	0.844697015986012	-5.53228846960798
Q9UGN5-1	PARP2	-0.0521159003876569	3.31891498238045	-1.94414823454213	0.0986846095095813	0.809378699915685	-5.53234345689143
Q9BUJ2-1	HNRNPUL1	-0.0368392403492856	3.31063895111114	-2.13120383410734	0.0759586288324102	0.800257563648142	-5.53388868808133
Q9BTZ2	DHRS4	0.0580940078767493	3.35294563182542	1.51785975608809	0.178652257713442	0.841841449350234	-5.53408018043967
O15198-1	SMAD9	0.0675056276568703	3.33466760464279	1.65492646795755	0.147808306511009	0.832891722183645	-5.5344680668197
O75915	ARL6IP5	-0.0869326010134727	3.3668410435274	-0.774999253918999	0.467080890148693	0.876454797415721	-5.53478145962338
Q99469	STAC	0.0579044848446404	3.31403018606856	0.886351847716428	0.408743834798209	0.864295639524382	-5.53507980402066
Q9ULK6	RNF150	0.0518887660118451	3.32741720017488	0.699646627046312	0.509730866804934	0.882302947037524	-5.53655164775801
Q8TF71	SLC16A10	0.0560793482282368	3.31838158649156	0.944562019864686	0.380493559737043	0.860794837423064	-5.53671845693478
P52848-1	NDST1	0.0758242999534919	3.3183854662997	1.80825329641027	0.119359638430072	0.822859148876231	-5.53690193432393
Q9NUJ7	PLCXD1	0.0982966875608531	3.27982363831885	0.642852410086495	0.543527069219527	0.889446731255197	-5.53774109442632
P22694-1	PRKACB	0.0636425574932075	3.30288630150234	1.55684115963133	0.169312031706158	0.837706900464479	-5.53785567010398
Q9NRP7	STK36	0.00563120016681689	3.33014285616806	0.0617847815957669	0.952693220428005	0.987966968320157	-5.53900617054511
Q9NP08	HMX1	-0.113564675819685	3.38848434152031	-0.792392190127795	0.457597889943994	0.875358938032651	-5.53909273264881
Q9Y3A3-3	MOB4	0.0773147009809947	3.31965957179031	1.77993080912757	0.124178887063243	0.829373171398803	-5.54054875488591
Q8IUC4	RHPN2	0.0720374198978205	3.30413234257629	1.48488361822257	0.186927035755117	0.842176722648431	-5.54079883840389
Q8IY17-4	PNPLA6	0.0584618551794657	3.31799265182601	1.75876875966721	0.127903452874931	0.83144027937145	-5.54158394048355
O95081	AGFG2	0.0717704049256372	3.31776873899642	0.891213781171372	0.4063252773238	0.864295639524382	-5.54247101062134
P50150	GNG4	0.0646511982363585	3.31307629850294	0.996019790398285	0.356797651382138	0.860794837423064	-5.54250542228047
P36508	ZNF76	0.0639025422377927	3.3788321745313	0.940081262346748	0.382613482080467	0.860794837423064	-5.54351717313757
O60503	ADCY9	0.059147367400727	3.29898609203631	1.28610875664802	0.24469682721796	0.844697015986012	-5.54503302784353
P51798-1	CLCN7	0.051231918883417	3.32305909263057	1.724320690579	0.134200281681484	0.831977927427241	-5.54594309179347
Q92558	WASF1	0.0575442391852163	3.31733242447999	1.64896450146618	0.149037421531782	0.832891722183645	-5.54594540310274
O95450	ADAMTS2	-0.0380761010145012	3.30010684477339	-0.367503437611288	0.725558781011816	0.936060169932196	-5.54639375166674
O60229-1	KALRN	0.0750608187844899	3.30080617080149	1.48408013775214	0.187133028736324	0.842176722648431	-5.54640093844704
Q96K49-1	TMEM87B	0.0771999083033947	3.29619820070756	1.39005139098299	0.212735476275503	0.844697015986012	-5.54664481023405
O60783	MRPS14	0.0606510717230513	3.30415747992032	0.945855127606566	0.379883459029746	0.860794837423064	-5.54715879173832
O43164	PJA2	0.0937183577010033	3.31529319766466	1.76473832620472	0.126841897396677	0.83071529676436	-5.5472896599358
O95873	C6orf47	0.00293390771912343	3.29062139911476	0.0304827851220245	0.976647175880573	0.992482123386622	-5.54740397319545
Q5SZL2-4	CEP85L	-0.00128523725499752	3.33857610854183	-0.013049126336014	0.990001610425102	0.996216009717968	-5.54773454232082
P35232	PHB	0.0624917700449088	3.37819843248665	1.94839519663588	0.098099380182062	0.809378699915685	-5.54836677026649
Q9H0H3	KLHL25	-0.0439655447793082	3.34743760718615	-1.65162347053369	0.148488045786821	0.832891722183645	-5.54843555581708
P22466	GAL	-0.0178435418491082	3.39471676294883	-0.128011846611846	0.902222939873333	0.977728200125351	-5.54863764454219
Q17R31-3	TATDN3	0.0110118992373733	3.34432702920762	0.100522369340625	0.923126540657407	0.982975163957701	-5.54929661443328
Q9BR61	ACBD6	0.0414592381100734	3.34277684356767	1.74607236232733	0.130190087084235	0.831977927427241	-5.54971040961351
Q6L8Q7-1	PDE12	0.0396095466614722	3.34942494928011	1.73618433375339	0.131998430428421	0.831977927427241	-5.55093361650334
Q9Y4X0	AMMECR1	0.0568495557112512	3.31956262123859	0.923953133337147	0.390319316505603	0.860794837423064	-5.55121883704321
Q9H2G9-1	BLZF1	0.0553395270645094	3.3717014723488	0.73109014613696	0.49162624869446	0.880710325399991	-5.55138668610343
Q8NCG7	DAGLB	0.0790559606012032	3.30191706597502	1.65149587978687	0.148514363256074	0.832891722183645	-5.55179364243446
Q9Y283-1	INVS	-0.0172680704671405	3.30407613100238	-0.170200581674316	0.870313380779308	0.968503163032573	-5.55243215146537
Q86VQ0	LCA5	0.0537132393284948	3.3267869995294	1.14926787892754	0.293166173458077	0.857848609265877	-5.55243324578349
Q9UBE8	NLK	0.057693501200784	3.32640943186187	1.16502533669283	0.287195559865484	0.854601857528813	-5.55253954041791
Q9Y2L8	ZKSCAN5	-0.00675225509684697	3.3270360847891	-0.0687358418179078	0.947380240322512	0.987007800052147	-5.55268084037094
P35555	FBN1	0.0412882202593902	3.30649379006625	0.351899476272472	0.736657400617377	0.93762634133172	-5.55285500047794
Q13822-3	ENPP2	-0.0724453675190198	3.33289028811017	-1.71007118221704	0.136892023831719	0.831977927427241	-5.5529496426223
Q9Y2B5	VPS9D1	0.0315877302838467	3.31338809370951	0.314784482746422	0.763331339427944	0.943909053750966	-5.55301498154617
Q8IYL2	TRMT44	-0.0522484096159074	3.34952499172218	-0.73313967630927	0.49046137454507	0.880710325399991	-5.55426963162015
Q504T8	MIDN	0.101458696446442	3.26606089544969	1.01741084133411	0.347296855804855	0.860794837423064	-5.55472567400161
Q8N3J9	ZNF664	0.0630443879474924	3.32278426685293	1.04355434593571	0.335961514901238	0.860794837423064	-5.55485658036357
P35914	HMGCL	0.0694943624220861	3.3767693011779	1.53803686098238	0.173759005502982	0.841841449350234	-5.55498130469993
Q9P0N9	TBC1D7; TBC1D7-LOC100130357	0.0767899747608116	3.31324126492761	1.58627023925803	0.162566929760887	0.837706900464479	-5.55531281292765
Q96GC5-1	MRPL48	0.165744791423379	3.33576882146349	1.75199488219954	0.129118525256422	0.831977927427241	-5.55555038331136
P21741	MDK	-0.165300520337109	3.17799119523939	-1.57136729213016	0.165950322080468	0.837706900464479	-5.55627651763879
A6NI28	ARHGAP42	0.0618682696646478	3.28902520099062	1.07663627213428	0.322049356450048	0.85858695849907	-5.55636076912326
Q6PI26	SHQ1	0.0562692320684308	3.33836411869787	1.45048336154045	0.195936701539411	0.843173051975301	-5.55647568622621
Q6UUV7-1	CRTC3	0.0678660443695042	3.30568742290802	1.27410443612497	0.248650042313216	0.847984763466763	-5.5571411298289
Q5SWA1	PPP1R15B	-0.0514798214501875	3.37361705811844	-0.587092679256763	0.578041415601112	0.894370592639398	-5.55717803044522
Q13895	BYSL	-0.0532444303990934	3.31245031939668	-2.01088169662171	0.0898801751524516	0.808487494800536	-5.55744966068426
Q9P1U0	ZNRD1	0.0748402830392592	3.27974846139748	0.786560729777491	0.460762098314102	0.876068191351071	-5.55745872465721
Q96SZ6-3	CDK5RAP1	0.0666737071663301	3.37233427694816	1.84582124054778	0.113249677729621	0.819165892389037	-5.55913886557853
Q16827-1	PTPRO	-0.0288063713311339	3.27041159356723	-0.219686354171233	0.833225624530444	0.958698247906941	-5.55917406604448
Q969T3	SNX21	-0.01607428612695	3.38939508622276	-0.12754309805372	0.902578723974896	0.977764294094183	-5.5591950653744
Q16585	SGCB	0.0264585337577954	3.31697745264453	0.265166572506581	0.799545027705493	0.952063965730187	-5.55976841082191
Q8IYB1	MB21D2	-0.0148220568111659	3.31727986594456	-0.159036033317572	0.878734607738898	0.970482043069317	-5.55988180222707
Q16706	MAN2A1	0.0615096243873313	3.3103411875229	1.53693887923486	0.174022021669193	0.841841449350234	-5.56016979991737
Q96GL9	FAM163A	0.050697338647132	3.30964558401574	0.815533096631348	0.445193233261139	0.872181149815476	-5.56082997927679
Q9P243-1	ZFAT	-0.0482635291742795	3.26245988713136	-0.50922598368902	0.628343161822865	0.91156780315966	-5.56090030920883
O94827-6	PLEKHG5	0.0539881771016161	3.31161474608795	0.776857241445005	0.466061360785762	0.876454797415721	-5.56137532780076
Q8TDB6-1	DTX3L	0.0539659740036794	3.35517841643916	0.938031767834156	0.383586164282625	0.860794837423064	-5.56157535004487
Q8N653	LZTR1	0.0504543089326615	3.29099059303136	1.43732505490747	0.199487487598562	0.843583188266447	-5.56161407409539
Q13432	UNC119	0.0197011619940208	3.36449461408071	0.213359394969261	0.837943718315004	0.960019081346052	-5.56169991566443
Q9Y4E1-4	FAM21C; WASHC2C	0.0899396545697753	3.31469630131276	2.13053524676276	0.0760295962647455	0.800257563648142	-5.56188962441867
Q96BS2-1	TESC	-0.132776039960104	3.39118885587072	-1.12803334414293	0.301377360132098	0.858059114626327	-5.56318885423141
Q9NX78	C14orf101; TMEM260	0.0198452989219444	3.32579438482833	0.219332848327244	0.833489040838578	0.958868982118463	-5.56392930643839
Q14135-4	VGLL4	0.048770825340077	3.35881943580835	1.50791327120034	0.181111521051992	0.841841449350234	-5.5645068536694
O75157	TSC22D2	0.0593130824967713	3.32142855878536	1.11233956157934	0.307569047660727	0.858059114626327	-5.56566488029125
Q86WN1-1	FCHSD1	0.0307604522066357	3.31241810353631	0.357245299122585	0.73284710792613	0.937360464496414	-5.56599018272166
Q7Z412	PEX26	0.0368831178985541	3.30770776840142	0.349570858071195	0.738319711134319	0.93834930812863	-5.56599397447645
Q8N3E9	PLCD3	-0.0387713238342954	3.31390882900532	-0.431965708490904	0.680500006667156	0.927366835651526	-5.56617620273755
Q9H0H5	RACGAP1	-0.0441861172750781	3.31642016199743	-1.97990284777488	0.0938647848420649	0.808487494800536	-5.56640640659352
Q9NZQ3-1	NCKIPSD	0.0612211979156312	3.310137005588	1.27107104568415	0.249657831906382	0.849130999380513	-5.56856633123648
Q58FF6	HSP90AB4P	0.0865371287271943	3.32630448516419	0.774598804638631	0.467300831648609	0.876454797415721	-5.56899624966716
P49789	FHIT	0.0864248350353103	3.32117959507829	1.33183935429028	0.230141437124453	0.844697015986012	-5.56956317774128
Q9Y5E7	PCDHB2	0.066195216956698	3.35734836284368	0.929179166473029	0.387809453471493	0.860794837423064	-5.56994994412971
Q01518-1	CAP1	-0.0451378367032873	3.32088834841126	-2.35858666782981	0.0553667132266381	0.77916608621583	-5.57000540240885
P11441	UBL4A	0.046434102471903	3.33060385438535	1.65381777942483	0.148036135656769	0.832891722183645	-5.57068496437169
Q8NA03	FSIP1	0.0505663261442784	3.32035969375096	0.614810848099297	0.560722335670387	0.891562169622263	-5.57122729061524
O43826-2	SLC37A4	0.0768036280433584	3.31656567279959	0.989987140870603	0.359514015805286	0.860794837423064	-5.57225766407406
Q9NYM9	BET1L	-0.101902906991464	3.32472451985347	-1.08865214297251	0.31711451738331	0.85858695849907	-5.57227042163916
P17010-3	ZFX	0.0523208829427773	3.27304154189339	0.940030305684317	0.382637642842658	0.860794837423064	-5.57230427932115
Q8N8K9-3	KIAA1958	0.0731884123550149	3.30251537420969	1.48513285208851	0.186863180938233	0.842176722648431	-5.57264480291111
Q9BVP2	GNL3	-0.0879491315433271	3.27764073232482	-2.06848393717288	0.082918861780205	0.800328542096179	-5.57312753361064
P50053	KHK	-0.0583421444126462	3.36284127610619	-0.6334794740038	0.54923772275568	0.891120059768034	-5.57323820444721
Q8TF30	WHAMM	-0.0228349620146848	3.32306070296768	-0.245741978113118	0.813877474193465	0.956278860245056	-5.57375303704601
Q9UGH3	SLC23A2	0.0360409963793356	3.3368103434413	0.404812783621575	0.699318887680422	0.931740358587544	-5.57396902898193
Q04771	ACVR1	0.053878013716913	3.32809615682856	1.17604756569146	0.283080721826161	0.854601857528813	-5.57454886398514
Q2TAL8	QRICH1	0.0779502692822103	3.30065650912878	1.76935531278656	0.126026766709941	0.83071529676436	-5.57464038272844
O75317	USP12	-0.00103377035944676	3.2961704147209	-0.0105392198475887	0.991924636796467	0.997171052333499	-5.57480480443046
Q99538	LGMN	0.0627321119191338	3.30245941388068	0.905307035357348	0.39937544379531	0.862333393595087	-5.5750935488802
Q14094	CCNI	0.0647791990041045	3.17449297151519	0.589773859434413	0.576352343584875	0.894242225409836	-5.57679888589087
P84101-1	SERF2	-0.0599666637353137	3.29649968749484	-1.1728774879295	0.284259012163251	0.854601857528813	-5.57690892122392
P0CG29	GSTT2	0.0537259664678293	3.31723436188989	1.39549396545757	0.211170468822058	0.844697015986012	-5.57813240265662
O75529-1	TAF5L	0.0433228476096187	3.34330554751995	1.6018175375426	0.159106885532895	0.836564269909247	-5.57819745596012
Q8NCN4	RNF169	-0.0483724596542462	3.27743037081407	-1.80013444073196	0.120722051143073	0.826466793981307	-5.5786550859837
O00750	PIK3C2B	0.0448674857038231	3.30948286312678	1.87671765085863	0.10845685912265	0.815361488070325	-5.57924317850964
Q9NW38-2	FANCL	0.0798481036911158	3.3095957664801	1.49070636241272	0.185440496581124	0.842176722648431	-5.57934074329088
P36402-3	TCF7	-0.0545315803239112	3.30487900399457	-1.31606746957317	0.235072071234655	0.844697015986012	-5.57980800121271
P15260	IFNGR1	0.0542244473458318	3.34447508316188	1.20681263201825	0.271860644862135	0.853779374610611	-5.58020351836605
Q6PKC3-1	TXNDC11	0.0584798035781439	3.32296155353598	0.829691919460851	0.437723279154867	0.869696789938134	-5.58064469452397
Q15329	E2F5	0.0554880763486545	3.30346889822039	1.18066332853102	0.281372522887318	0.854601857528813	-5.58091673139342
Q8N8E2-1	ZNF513	0.00626502669084025	3.34406833360554	0.0702162602077526	0.946249066664739	0.987007800052147	-5.58118674250035
Q9Y2I1-1	NISCH	0.0699752814085409	3.33597113326465	1.63715978583859	0.151499989090765	0.832891722183645	-5.58231966269658
O75077	ADAM23	0.030073258393015	3.3113257105354	0.323112415590908	0.757313681466446	0.941952678111652	-5.58311317996757
Q92581-2	SLC9A6	0.0572813211458707	3.32038090274316	0.944548017907143	0.38050017013858	0.860794837423064	-5.58340120724958
Q9UPZ6	THSD7A	0.0686967984142184	3.32427234203202	0.994829409395622	0.357332361826901	0.860794837423064	-5.58385627051045
Q9H6W3	C14orf169; RIOX1	-0.0445567090667055	3.29929908148597	-1.66063311268288	0.14664093051625	0.832891722183645	-5.5847550281222
Q03001-11	DST	-0.112650775396582	3.30454315782447	-0.860761811270585	0.421651069019973	0.867779168732304	-5.58497045612622
Q00005-7	PPP2R2B	0.0849676050754994	3.35296547839304	0.751133802518859	0.480314628526067	0.878615863549925	-5.58497667154887
Q9NW61	PLEKHJ1	0.0626879094906932	3.31624048248199	1.09627370133902	0.314016820841948	0.858059114626327	-5.58618825603605
Q9UEE5	STK17A	0.0486381553437334	3.31079554051851	1.03681022847985	0.338856684589877	0.860794837423064	-5.58622644846734
Q8IV36	HID1	0.00281277414927371	3.32882599820095	0.0264644193668838	0.979724742133545	0.992825851012063	-5.58684549746943
P04150-3	NR3C1	0.0490895442545307	3.32185818859911	1.37717273921562	0.216480666747259	0.844697015986012	-5.58727499703435
Q14722-2	KCNAB1	0.0573427576265752	3.32684540666422	0.84773886427577	0.428334219693729	0.868823055137944	-5.58747089669865
Q6PI77	BHLHB9; ARMCX5-GPRASP2	0.04151917812782	3.35228530626475	0.531740257907817	0.613555895381867	0.907033351780255	-5.58749961704274
P19532	TFE3	0.0601700640066873	3.32215200942233	1.15713046096093	0.290173992640588	0.854601857528813	-5.58764036011068
Q9UKP4	ADAMTS7	0.030983710715009	3.27733444399219	0.35792532604217	0.732363002876348	0.937360464496414	-5.58779790457942
Q9BZQ4	NMNAT2	0.0549646071177561	3.31780161032307	0.689973695388809	0.51538795298867	0.882302947037524	-5.58784055021602
O00124-1	UBXN8	-0.0111359624070509	3.39909603379149	-0.123261448232175	0.905829662708496	0.978856581852088	-5.58869871030955
Q15040	JOSD1	0.0452881263199586	3.32023544655075	0.565610443206465	0.59167982735502	0.899308449353519	-5.58926233464707
Q8TCB7-1	METTL6	0.0521315839236997	3.34601614167269	1.1986670820605	0.274793587678758	0.853779374610611	-5.58960554297612
Q15834	CCDC85B	0.0531479356429116	3.34761078391706	1.27789552676431	0.247395547319926	0.84693605029113	-5.58975592341804
O60512	B4GALT3	0.0540095062277247	3.32741475625863	0.781606026324946	0.463462646484629	0.876454797415721	-5.58975711642444
O95249-1	GOSR1	0.0806429610013153	3.31879006855855	1.63624557351162	0.151692315861318	0.832891722183645	-5.59004291134612
Q8TAP8	PPP1R35	0.00660131886211813	3.299090005075	0.0681104585069996	0.947858130124515	0.987007800052147	-5.59061114982173
Q53S33	BOLA3	0.0673512636005574	3.3352670615628	1.28401768562576	0.245381443162533	0.844697015986012	-5.59161659586795
Q92845	KIFAP3	0.0565002796728654	3.31172697503328	1.80286996415401	0.120261311499484	0.826466793981307	-5.5935688721626
Q16572	SLC18A3	0.0597075759651301	3.31945107419676	0.938912433112966	0.383167970701031	0.860794837423064	-5.5943845910123
Q9H019-1	FAM54B; MTFR1L	0.0634615336151536	3.34011094709028	1.15643527580898	0.290437507483101	0.854601857528813	-5.59445152861088
Q13207	TBX2	0.0887955948397585	3.32219742384449	1.38797710748333	0.213334697977564	0.844697015986012	-5.59488385381354
Q9NR33	POLE4	0.148804196468317	3.283532072595	1.11181817033689	0.307776559162179	0.858059114626327	-5.59629408509198
Q92569	PIK3R3	-0.00527832882021439	3.40222205277316	-0.0465701128572283	0.964331258720115	0.989009027151929	-5.59631994604173
Q969E2-1	SCAMP4	0.0691692518943113	3.30100221328173	1.29714665779117	0.241110879864351	0.844697015986012	-5.59634809917194
P13378	HOXD8	-0.0566820808764646	3.34302406059361	-0.455199555790562	0.664593299935474	0.921035538835132	-5.59682255901649
Q9UJF2-2	RASAL2	0.0430041716900624	3.32087357457855	1.92641402803457	0.101166304052031	0.809378699915685	-5.59687344084031
Q14142	TRIM14	0.0589272442997336	3.32533629555758	1.08112087729316	0.320200224860638	0.85858695849907	-5.59711392348517
Q8WUY8	NAT14	0.0547348099394459	3.30767775582391	0.941008239661306	0.382174167316972	0.860794837423064	-5.5972351745476
O94856-9	NFASC	-0.0522447068305645	3.29860533139586	-0.908416814456581	0.397854086868305	0.861744992997697	-5.59737595472986
P59768	GNG2	0.0731951335256616	3.36726581962099	1.07807025507604	0.321457132765111	0.85858695849907	-5.59738577370768
Q9NYJ1-2	COA4	-0.22874803559599	3.31049375307663	-1.30431213267358	0.23880793934518	0.844697015986012	-5.59742408884328
Q9NVH6-8	TMLHE	0.0526135791628967	3.33925310264945	1.13278968143231	0.299521547052458	0.858059114626327	-5.59844135806033
Q8NG27	PJA1	0.0532361178607025	3.34079243196846	0.87340702268467	0.415235716097687	0.867520032428651	-5.59882752959014
Q9NWT8	AURKAIP1	-0.0256665766106482	3.29184890851915	-0.314453151862178	0.763571131495095	0.943909053750966	-5.59969407867657
Q8WVL7	ANKRD49	0.0363762432282306	3.38724027890022	0.382525991159996	0.714941851556356	0.933259902142452	-5.60038329624677
Q9BT30	ALKBH7	0.0582897147699285	3.39200058595752	0.756580000061616	0.477272107339073	0.877498284623617	-5.60040985829978
Q96MV1	TMEM56	-0.0408452379678556	3.31844995200656	-0.327968981447259	0.753812895104652	0.940589990835539	-5.60057530784838
Q86YF9	DZIP1	0.0661754311052691	3.32717338252997	1.10495637957713	0.310518387289633	0.858059114626327	-5.60231619372915
Q9UK33	ZNF580	-0.0510147964343968	3.24717169156163	-0.879597195668558	0.412121793778576	0.864295639524382	-5.60235187219094
Q9NWX6	THG1L	0.0841399111933653	3.31172747940512	1.60833696753923	0.157676877718538	0.836128786680491	-5.60235629888376
Q13643	FHL3	0.062887387984383	3.33596177354607	1.47749443825634	0.188829386542445	0.842844980924057	-5.60285653059784
O95819	MAP4K4	0.0783178017953945	3.28606848764496	1.07041140570854	0.324630560561758	0.859067866855967	-5.60317488966158
Q3SXY8	ARL13B	0.0807126304667928	3.29427306294917	1.23675374637884	0.261310601222355	0.851144837764215	-5.60471592648433
Q9HA47-4	UCK1	0.0662259318647026	3.32420256049141	1.25776753174627	0.254120115863333	0.849130999380513	-5.60511650390536
Q9BWW4	SSBP3	0.0504034108898016	3.33532954821284	0.926097944630753	0.389287745891915	0.860794837423064	-5.60525663957623
Q9H8W5-1	TRIM45	0.0229859458136412	3.36110119167694	0.284814097182686	0.785134174668452	0.950056204455666	-5.60528534197152
Q9NSU2-1	TREX1	-0.0512074870190674	3.30280331076323	-0.789965155957861	0.458912954564394	0.875600455309863	-5.60576355827171
Q8NEF3-2	CCDC112	-0.0257761644298168	3.34624952418542	-0.279336149311833	0.789143048452338	0.950056204455666	-5.60601352666511
Q5HYW2	NHSL2	0.0589161564459213	3.30927876028023	1.59348849705345	0.160951734741012	0.837511648440124	-5.60657119582501
Q08499-1	PDE4D	0.0555289495254886	3.32029533926816	0.984703079532249	0.361906712553248	0.860794837423064	-5.60723417099442
[truncated: 6,337 more rows]
