# Supplementary material for: Thalidomide promotes degradation of SALL4, a transcription factor implicated in Duane Radial Ray syndrome
Source: eLife journal article supplement (doi:10.7554/elife.38430), 2018-08-01
Supplement: supp [file elife-38430-supp-v1.zip › elife_poa_e38430_Figure_1_source_data_11.csv]

	ID	logFC	AveExpr	t	P.Value	adj.P.Val	B
Q96JP5-1	ZFP91	-2.80888308173125	3.28693423824583	-58.1768495914124	8.46803200830136e-08	0.000705895148212001	0.0557963233897674
P09001	MRPL3	-0.187840114497191	3.27390778195355	-4.47139591094894	0.00792401485862712	0.822903519863698	-2.04791486676198
Q86V21-1	AACS	0.188455885671816	3.30966725980262	4.35785577615401	0.00875161568341842	0.822903519863698	-2.05618302340464
P36542-1	ATP5C1	-0.159149743777232	3.29106407791131	-4.29866976189387	0.00922315489387698	0.822903519863698	-2.115588466862
Q9UDR5	AASS	-0.20726904665955	3.30109882040235	-4.19552616655592	0.0101181625501181	0.822903519863698	-2.19461027342104
P82675	MRPS5	-0.156266391711333	3.28187929150146	-4.09695299080323	0.0110700695882658	0.822903519863698	-2.30253529266239
P30048	PRDX3	-0.153018722743127	3.29269259072663	-3.87429368788883	0.0136334274566917	0.822903519863698	-2.44371656410964
P42765	ACAA2	-0.137293668161737	3.28552221777087	-3.87340632215815	0.0136449486900766	0.822903519863698	-2.4634533192006
Q8N5K1	CISD2	-0.194622976632857	3.38389901360476	-4.00700537849871	0.0120312649470617	0.822903519863698	-2.5069529713998
Q8IXM3	MRPL41	-0.588771905073709	3.26082931502268	-4.6761943372234	0.00665272566975352	0.822903519863698	-2.50912157136951
P05166-2	PCCB	-0.209617925260266	3.28558516111555	-3.84390595481033	0.0140345069013827	0.822903519863698	-2.51258057729971
Q16836-2	HADH	-0.175479044197295	3.28339345747362	-3.8718869365319	0.0136647021925653	0.822903519863698	-2.51591618363423
Q6PJT7-5	ZC3H14	0.148397132014923	3.31637192769415	3.75467435748924	0.0152940640014887	0.822903519863698	-2.53742820586224
Q9NS37	CREBZF	0.443350977749431	3.06403337739986	5.80440748665499	0.00277635984625103	0.822903519863698	-2.55261492222229
P55084	HADHB	-0.232532097749769	3.28597065200621	-3.72571011126118	0.0157308358509718	0.822903519863698	-2.56867744133466
Q7L0Y3	TRMT10C	-0.222103127968635	3.30085714118749	-3.71870084349757	0.0158387003376307	0.822903519863698	-2.57052856187678
P00367	GLUD1	-0.276415062139813	3.30211538164349	-3.76080906471734	0.0152033723994943	0.822903519863698	-2.57393895159234
Q9H116	GZF1	-0.333560546317113	3.41865611324219	-4.62855852911523	0.00692553779522922	0.822903519863698	-2.57612761029204
P82930	MRPS34	-0.230916408737414	3.28402903617159	-3.9064544071057	0.0132234152123675	0.822903519863698	-2.5770595340933
Q9BRR8	GPATCH1	0.172347841220964	3.31073687686043	3.752672585285	0.0153237928760738	0.822903519863698	-2.58362248033036
Q68DA7-1	FMN1	0.37363026720129	3.29843304325035	5.20676701756499	0.00433292921860474	0.822903519863698	-2.60383893075472
Q9BRJ2	MRPL45	-0.165589837421062	3.28582478880884	-3.67672271329449	0.0165029595217167	0.822903519863698	-2.64670308676899
Q9UIJ7-1	AK3	-0.410767626754704	3.29395194699586	-3.7293484796249	0.0156751820723135	0.822903519863698	-2.64916425571311
Q9NV88-1	INTS9	0.215991175754024	3.33506832892199	3.6944210435901	0.0162190349703397	0.822903519863698	-2.65082478684725
Q9BYD3	MRPL4	-0.27875149981937	3.26753840911824	-3.78277180124741	0.0148837755539143	0.822903519863698	-2.69427005662864
P02771	AFP	0.665129201203747	3.44177493035267	6.08959039268791	0.00227370574476991	0.822903519863698	-2.69847128019803
P51157-1	RAB28	-0.900386334749913	3.62815729141566	-9.93081201726095	0.000273347286306607	0.822903519863698	-2.71913364174179
P62805	HIST1H4A; HIST1H4F; HIST1H4D; HIST1H4J; HIST2H4A; HIST2H4B; HIST1H4H; HIST1H4C; HIST4H4; HIST1H4E; HIST1H4I; HIST1H4B; HIST1H4K; HIST1H4L	-0.271306918143268	3.36577593307663	-3.64233901714345	0.0170712056662767	0.822903519863698	-2.72053666805578
P49411	TUFM	-0.122536089887776	3.29551531452854	-3.62738964377425	0.0173253222190028	0.822903519863698	-2.77129443336015
Q9P015	MRPL15	-0.355625297104913	3.28426565244278	-3.49876587869737	0.0197024561144269	0.822903519863698	-2.78445046983283
Q96MD2	C12orf66	0.752483588790742	3.34810495333186	7.03083862410838	0.00123699792623101	0.822903519863698	-2.78989499934772
Q8TD30-1	GPT2	-0.250356721365874	3.30136606893554	-3.46170734364265	0.0204558846482851	0.822903519863698	-2.80483162987107
Q9NYK5-1	MRPL39	-0.281572769502771	3.29381316279213	-3.37933298040667	0.0222528012321011	0.822903519863698	-2.86979340018143
Q6YP21	CCBL2; KYAT3	0.167412544424454	3.32126323209673	3.3972766331999	0.0218463767038065	0.822903519863698	-2.87910376474274
Q04727-1	TLE4	-0.194837706903686	3.33682530743958	-3.34772770823263	0.0229900128063261	0.822903519863698	-2.89584325856967
P45880-2	VDAC2	-0.0704863161909226	3.29634769655071	-3.49666274413196	0.0197443471217483	0.822903519863698	-2.92312184509153
Q8N1G0	ZNF687	0.16388894923584	3.31487631598587	3.31188697360676	0.0238602326979168	0.822903519863698	-2.92990622888157
P49821	NDUFV1	-0.20112888983677	3.2907720563877	-3.31190038567573	0.0238599000460883	0.822903519863698	-2.942518868412
P80303	NUCB2	0.233373225271744	3.31828995661026	3.27518936592181	0.0247906952123421	0.822903519863698	-2.9592574744499
Q02252	ALDH6A1	-0.170254765458828	3.27888616070134	-3.26008340226035	0.0251857523639208	0.822903519863698	-2.97938209281937
Q96IR7	HPDL	-0.386755947937332	3.32678626583695	-3.58565383532469	0.0180582917502714	0.822903519863698	-2.98399447241914
P54278	PMS2; LOC107984056	-0.18655271444516	3.35135552702406	-3.27745147125074	0.0247321497819262	0.822903519863698	-2.98832620284537
Q9Y2R9	MRPS7	-0.259861653133446	3.3002108290425	-3.32805087458007	0.0234631667906531	0.822903519863698	-2.99359916364649
Q9H0R6-1	QRSL1	-0.179800604866568	3.29657848374222	-3.22798520766951	0.0260494016556003	0.822903519863698	-3.00286760862834
O43824	GTPBP6	-0.189072429164587	3.29214349188714	-3.30784101081014	0.0239608259998928	0.822903519863698	-3.01823882392812
Q9GZT3-1	SLIRP	-0.244276705314112	3.2833500556586	-3.20964752780508	0.0265580125626863	0.822903519863698	-3.03199879132041
P01024	C3	0.621406787184841	3.43042232864011	5.66912103957188	0.00306071240893721	0.822903519863698	-3.04133354739226
Q3SY69-1	ALDH1L2	-0.176698061643411	3.28208476907533	-3.19831407259053	0.0268780378259462	0.822903519863698	-3.0486690766263
Q7Z7H8-2	MRPL10	-0.310361526162788	3.30283404387014	-3.60352088600947	0.0177401971853879	0.822903519863698	-3.0838277676132
O00255-2	MEN1	0.203313963677124	3.3103913320445	3.12447710823177	0.0290742741439164	0.822903519863698	-3.09446569067098
Q9BT17-1	MTG1	-0.272109210699489	3.29238806430059	-3.45878615914716	0.0205166752105459	0.822903519863698	-3.09957701017368
P06576	ATP5B	-0.182326319880067	3.28966164850555	-3.30471963910805	0.0240387644159497	0.822903519863698	-3.10553883471526
Q13126-1	MTAP	-0.194264165596901	3.34710900986876	-3.09672764351445	0.0299521202555678	0.822903519863698	-3.13195868064865
P04181-1	OAT	-0.230887454875288	3.31307023048136	-3.08133509167039	0.0304520719190326	0.822903519863698	-3.13570218374374
Q16822-1	PCK2	-0.209458942689721	3.29473573507745	-3.06572876362301	0.0309686983818102	0.822903519863698	-3.14702334820366
O60885-1	BRD4	0.0910164450674553	3.53079469123407	3.16011310371363	0.0279896801962505	0.822903519863698	-3.15273099210835
P23378	GLDC	-0.209628967074621	3.28625150368617	-3.05915578172145	0.031189270132629	0.822903519863698	-3.15342670013254
P34897-1	SHMT2	-0.335326699315944	3.29995839562502	-3.20795125970325	0.0266056317702694	0.822903519863698	-3.15844545590953
P04114	APOB	0.212271388267499	3.35009474284571	3.25895501320129	0.0252155510896883	0.822903519863698	-3.16444574440443
P43250-2	GRK6	0.208817016850831	3.30131989133856	3.15647935816075	0.0280981320605579	0.822903519863698	-3.17867749870115
P12694	BCKDHA	-0.226986656441358	3.28627168661162	-3.05881735717288	0.0312006750856345	0.822903519863698	-3.18025210276089
Q96A35	MRPL24	-0.24162727192857	3.29951577874264	-3.1092240063489	0.0295531127062296	0.822903519863698	-3.20559794438888
P49736	MCM2	0.0692512745130888	3.3184805229458	3.37877648938472	0.0222655442411427	0.822903519863698	-3.21230494494368
O60281-1	ZNF292	-0.123445039299506	3.28740083719632	-3.01046383064677	0.0328800646820796	0.822903519863698	-3.21704407179647
Q96CK0	ZNF653	-0.829498808559246	3.42386111391893	-7.40982407051806	0.000987064903134254	0.822903519863698	-3.2206437666176
P51608-2	MECP2	-0.259841566419788	3.28991655348833	-3.25710121075656	0.0252645944855909	0.822903519863698	-3.22135948871465
Q9NWU5	MRPL22	-0.287688531986301	3.25927162515532	-3.40072430993757	0.0217692691191788	0.822903519863698	-3.24192546180165
O43766-1	LIAS	-0.352966712912529	3.30320527943418	-3.70356887534386	0.0160745056889845	0.822903519863698	-3.24216972540426
P11177	PDHB	-0.315658201311265	3.27555658334947	-2.9523208051336	0.0350370824097353	0.822903519863698	-3.25561295073517
P19823	ITIH2	0.717914665725168	3.42949059389319	4.67201809043592	0.00667612968229895	0.822903519863698	-3.25642612563631
Q9HBK9	AS3MT	-0.120365350522892	3.3370738714523	-2.95553159264191	0.0349138621941132	0.822903519863698	-3.26430186817723
P62318	SNRPD3	-0.196542948646157	3.31754090671303	-2.93908764954047	0.0355501591379725	0.822903519863698	-3.27230774081596
P14314	PRKCSH	0.0879260193344327	3.32916600921288	3.02979794001645	0.0321965217277987	0.822903519863698	-3.27594203455183
Q9BYC9	MRPL20	-0.250404434514176	3.26518795415584	-3.2849397284321	0.0245394752920108	0.822903519863698	-3.27855119855211
O60493-1	SNX3	-0.391030343773411	3.33257750884216	-2.95638319594961	0.0348812627426502	0.822903519863698	-3.28489633711689
Q9Y3D9	MRPS23	-0.22993701848238	3.29016356999968	-3.17360777989751	0.0275910878144585	0.822903519863698	-3.28638370958516
Q13867	BLMH	0.123063987481374	3.32942448401992	2.97827444303063	0.0340549966392668	0.822903519863698	-3.2869972302018
P02774-3	GC	0.736704403063599	3.41992065049893	4.63715097598074	0.00687536674965786	0.822903519863698	-3.29554771744248
P01023	A2M	0.350752905077671	3.39587145185382	3.38305331231271	0.0221678252024856	0.822903519863698	-3.31315090192111
Q9UJQ4	SALL4	-0.970093756917581	3.70448447837815	-8.1706894347104	0.000645783891892736	0.822903519863698	-3.31393227827296
O75319-1	DUSP11	-0.440489409396825	3.33349657397503	-3.11204651461902	0.0294638317150619	0.822903519863698	-3.31987342306498
P05204	HMGN2	-0.836642612198586	3.26351746327534	-3.42963940947274	0.0211347762008909	0.822903519863698	-3.32863154245062
P62633-1	CNBP	0.160148424125852	3.25509725886191	2.8967871843934	0.037248197518347	0.822903519863698	-3.34064090369054
O95900	TRUB2	-0.211735431511553	3.2687682954734	-2.9640826866322	0.0345880869984056	0.822903519863698	-3.34167800620218
Q92820	GGH	0.151550031327013	3.35173752929996	2.85247967625194	0.0391258559415672	0.822903519863698	-3.34223398282002
Q8IVS2	MCAT	-0.34868913127349	3.28899436366363	-2.92430286912074	0.0361334898524197	0.822903519863698	-3.34999486953345
P80404	ABAT	-0.248258627715319	3.30167850265929	-2.85639783886508	0.0389555733677522	0.822903519863698	-3.35304976230013
P42766	RPL35	-0.268929398282554	3.3372545308547	-2.86839884390621	0.0384391951544873	0.822903519863698	-3.35609345028104
P50749	RASSF2	-0.214457266642962	3.33219615122306	-2.86410382087979	0.0386231078003813	0.822903519863698	-3.37316891741027
Q8NBM8	PCYOX1L	0.255438938388239	3.31396271129778	3.04182678070015	0.0317794086185666	0.822903519863698	-3.37401956407374
Q7L3T8	PARS2	-0.242548394975843	3.28092054032552	-3.04597428299096	0.0316370172868351	0.822903519863698	-3.38123255052185
Q9BW66-3	CINP	-0.412563252799976	3.38324659278381	-3.54814132726328	0.0187478689513376	0.822903519863698	-3.38223140182549
Q7L592	NDUFAF7	-0.141950034088802	3.28739269967046	-2.78877574164994	0.0420155881240098	0.822903519863698	-3.39766081735439
P09455-1	RBP1	-0.152990283904233	3.33462978837793	-2.79597725305722	0.0416771521563522	0.822903519863698	-3.40042428764859
O43765	SGTA	0.139608317179109	3.32301286552901	2.81427644716263	0.0408309001233951	0.822903519863698	-3.40652421800318
Q96T88-2	UHRF1	0.15385715751649	3.30540684339765	2.91376456333416	0.0365558934114808	0.822903519863698	-3.40935279053804
Q8TAE8	GADD45GIP1	-0.296777646842906	3.25699684408285	-3.10114880502833	0.0298102549010475	0.822903519863698	-3.41630064076339
Q96AG4	LRRC59	-0.212310516478754	3.32804599853506	-2.7790255145276	0.042478739190089	0.822903519863698	-3.43893325753468
P23919	DTYMK	-0.325714043682899	3.32251980537044	-2.76517725591354	0.0431464532666366	0.822903519863698	-3.44123986310087
P22830-2	FECH	-0.144464091111502	3.30237430496053	-2.73792589072976	0.0444951384293547	0.822903519863698	-3.44540327931992
P30837	ALDH1B1	-0.18828837216259	3.29676869391391	-2.79538741332237	0.0417047561026581	0.822903519863698	-3.44835223944879
P13667	PDIA4	0.138801117997028	3.32606178725253	3.12067926401507	0.0291926663548857	0.822903519863698	-3.44964834027716
P30626-1	SRI	0.374877223559524	3.34950808130389	2.78908427876318	0.0420010251340716	0.822903519863698	-3.4536152121591
Q9HCC0-1	MCCC2	-0.241806733883974	3.29721448866898	-2.72019737702202	0.0453979192569999	0.822903519863698	-3.46089558526451
P56556	NDUFA6	-0.22307260086716	3.34779223134654	-2.79938910975642	0.0415178834104514	0.822903519863698	-3.47032382512661
Q8IXQ4	GPALPP1; KIAA1704	0.234621655284729	3.28058676317691	2.77886248019121	0.042486532235439	0.822903519863698	-3.47646397869045
P00374	DHFR; DHFRP1	-0.281489481831454	3.3213589081532	-2.70994587967029	0.0459293137220287	0.822903519863698	-3.47959840589894
P55263-1	ADK	-0.164291497614958	3.34610898388913	-2.75338448886151	0.0437243668799532	0.822903519863698	-3.48528242814244
Q9NV79	PCMTD2	-0.17569907823494	3.33795858085933	-2.72577372089428	0.0451117617044919	0.822903519863698	-3.48819758067406
Q9Y291	MRPS33	-0.238218642541878	3.27423182651873	-2.9865668502926	0.0337478238361201	0.822903519863698	-3.48862144660345
Q86WA6	BPHL	-0.301863265897273	3.30951972997458	-2.73632363428581	0.0445758960453223	0.822903519863698	-3.49309224880943
Q9H2W6	MRPL46	-0.415566781771739	3.30229423688166	-2.73834118802859	0.0444742332391806	0.822903519863698	-3.49365489639854
Q13084	MRPL28	-0.212736794179056	3.2833842320718	-2.84591497357661	0.0394130426517314	0.822903519863698	-3.4984589829472
P11182	DBT	-0.204410910800016	3.28729013669167	-2.72417770973613	0.0451934560069479	0.822903519863698	-3.49976976530894
P45954	ACADSB	-0.207407839457729	3.28580765771709	-2.67032543471031	0.048049572563758	0.822903519863698	-3.50524682614878
Q6P587-3	FAHD1	-0.293491422702523	3.30691758726684	-2.85888847029519	0.0388477659240512	0.822903519863698	-3.50564166202148
P37198	NUP62	0.190840315919616	3.32944914037925	2.6801207878972	0.0475153696143299	0.822903519863698	-3.50615102089731
P11498	PC	-0.113651975796956	3.28944222242284	-2.77244758740959	0.0427944440898628	0.822903519863698	-3.50641602773955
Q9P0M9	MRPL27	-0.178132204408181	3.28257027931174	-2.68758951284361	0.0471125159693021	0.822903519863698	-3.51422894477352
Q9BRT2	MNF1; UQCC2	-0.222947437632388	3.28176068240819	-2.75155190074317	0.0438149524990071	0.822903519863698	-3.51426156899175
P14854	COX6B1	-0.284728034206521	3.30909057752791	-2.6973081782396	0.0465940154790109	0.822903519863698	-3.52290628162049
Q96E29-2	MTERFD1; MTERF3	-0.237131542834462	3.30533625242916	-2.68536742187353	0.0472319719314265	0.822903519863698	-3.52855407898163
Q8NB90-1	SPATA5	-0.181812035799159	3.33570158953505	-2.72292501611177	0.045257693289557	0.822903519863698	-3.5301063717196
Q969U7	PSMG2	0.184591344958799	3.33434234942972	2.64201582166351	0.0496315976003274	0.822903519863698	-3.53208285774193
P83731	RPL24	-0.223086795581328	3.3127843144551	-2.64916191467481	0.0492268329531647	0.822903519863698	-3.53741371329283
P40939	HADHA	-0.137726026932117	3.27618575028068	-2.8100110195712	0.0410264128967029	0.822903519863698	-3.54831727409502
Q96P11-2	NSUN5	-0.159453541070165	3.34243281231914	-2.67167569882302	0.047975536485044	0.822903519863698	-3.54903056019388
Q92993-3	KAT5	0.19139928059921	3.29225010242791	2.64453356700219	0.0494885665111829	0.822903519863698	-3.5501660502044
P31937	HIBADH	-0.216105158719293	3.27677024995311	-2.73619623333243	0.0445823244184946	0.822903519863698	-3.55117064388318
P30533	LRPAP1	0.134619449387277	3.33136833276953	2.6177457703178	0.0510342693351571	0.822903519863698	-3.5523735490505
Q5TGY3	AHDC1	0.180033788576215	3.31355672330072	2.61776658756274	0.0510330474254335	0.822903519863698	-3.55287170989632
P22570-7	FDXR	-0.229243426708651	3.27996366033007	-2.61754779815298	0.0510458913365541	0.822903519863698	-3.5571248480407
Q08257	CRYZ	-0.324773536803005	3.3078921887211	-2.61424275624394	0.0512403510211772	0.822903519863698	-3.55800853044016
P82933	MRPS9	-0.112865035357629	3.28011125537442	-2.64533171973902	0.0494433202168558	0.822903519863698	-3.56298985695414
Q9Y3C6	PPIL1	0.152704477574467	3.2992608348727	2.66007588850207	0.0486157466247674	0.822903519863698	-3.56371870630809
Q9HCE3	ZNF532	0.12077389590424	3.31531449863486	2.72615470954965	0.0450922847049092	0.822903519863698	-3.56522272291907
Q9Y2Z9-1	COQ6	-0.266263715752253	3.28811060846937	-2.68888511776223	0.0470430224501762	0.822903519863698	-3.56804678706656
O15119-2	TBX3	-0.291948893180962	3.36765795265458	-2.63150418567379	0.0502337606665852	0.822903519863698	-3.57682364714982
Q9UNI6	DUSP12	-0.1856010937187	3.32528969779085	-2.58793865392478	0.0528177724492228	0.822903519863698	-3.57944311375539
P48147	PREP	0.0737344502958928	3.32531602110961	2.82836733354786	0.0401924449224953	0.822903519863698	-3.58025406864196
Q9NRX2	MRPL17	-0.368315458404418	3.30965534563339	-2.92715471405026	0.0360201321548929	0.822903519863698	-3.58136984497083
Q9NQR7	CCDC177	0.257405669427012	3.11342985314213	2.78744170304453	0.0420786203298595	0.822903519863698	-3.58860400152757
Q8NC60	NOA1	-0.129267758859596	3.26723826502843	-2.58568840979986	0.0529552073130522	0.822903519863698	-3.58908275993638
O00566	MPHOSPH10	0.2027930405752	3.32650311687871	2.62572564408403	0.0505682563122292	0.822903519863698	-3.59007896495959
P19388	POLR2E	-0.281237409494297	3.37006472582277	-2.57334735803954	0.0537160540359965	0.822903519863698	-3.59463146264703
Q3KQV9	UAP1L1	-0.350465697299426	3.3239344361486	-2.56939501478182	0.0539622868949212	0.822903519863698	-3.59787854929078
Q6KC79	NIPBL	0.117696088026348	3.31867699282432	2.89746923931005	0.0372201003812891	0.822903519863698	-3.59887867210983
Q9NQH7-1	XPNPEP3	-0.176311523823924	3.30587225453467	-2.57010195521529	0.0539181521696262	0.822903519863698	-3.60372567322027
Q9BQC3	DPH2	-0.297202487841875	3.33337009240982	-2.57225892522625	0.0537837390402266	0.822903519863698	-3.60849503691763
O75362	ZNF217	0.121703743571492	3.35187465983953	2.66255660601334	0.048478033545332	0.822903519863698	-3.61262029152545
Q92665	MRPS31	-0.283013605441357	3.30445692985977	-2.57044981074156	0.0538964500680799	0.822903519863698	-3.61265769351501
Q92769	HDAC2	0.0746299698149925	3.32293552737741	2.76510726852765	0.0431498576376593	0.822903519863698	-3.61814193073899
Q92541	RTF1	0.114580349203887	3.32783162631081	2.70622731075143	0.0461237887102631	0.822903519863698	-3.62016847221057
P42898-2	MTHFR	0.155228826904528	3.29683607656444	2.54007516336931	0.0558285825137811	0.822903519863698	-3.62268766215914
Q13404-1	TMEM189-UBE2V1; UBE2V1	-0.276962004122184	3.34503332162816	-2.61087838671985	0.0514391498709159	0.822903519863698	-3.62418084196223
Q15269	PWP2; LOC102724159	0.108903420758604	3.32324635598846	2.66454086885078	0.048368194181595	0.822903519863698	-3.6256538844198
Q96QC0	PPP1R10	0.189573056568079	3.30345800436718	2.6205990223926	0.050867095761112	0.822903519863698	-3.62649564716474
Q8WVK2	SNRNP27	0.276408655087418	3.30632400922735	2.54284364720149	0.0556493308553622	0.822903519863698	-3.62851501502504
Q9BX68	HINT2	-0.425493573273382	3.32634499121737	-2.56955024061372	0.0539525926108822	0.822903519863698	-3.62913288377791
Q9BQQ3-1	GORASP1	0.298238078865824	3.32891013944417	2.94260052858474	0.0354131323273979	0.822903519863698	-3.6342916448291
O00299	CLIC1	-0.137619372893751	3.34454166127401	-2.52421190673738	0.0568681160855206	0.822903519863698	-3.63656570460633
Q6T4R5-1	NHS	0.485813384470398	3.38293667537631	3.69604327402951	0.0161932952041914	0.822903519863698	-3.6374585412131
Q86TI2-2	DPP9	0.175308393979894	3.29706043075915	2.55514322805125	0.0548606541875254	0.822903519863698	-3.64110230107335
O76071	CIAO1	-0.172754955913023	3.32402918588263	-2.51937961742855	0.0571890315975812	0.822903519863698	-3.64174072955227
Q92804-1	TAF15	0.346997956074604	3.28442181589366	2.59064613345674	0.0526529375786872	0.822903519863698	-3.64187183136749
O94925-1	GLS	-0.11228718475685	3.28997411542689	-2.56164070080962	0.0544490384303675	0.822903519863698	-3.64750444325341
Q92530	PSMF1	-0.284747959757504	3.36198163752908	-2.53869139302778	0.0559184179063717	0.822903519863698	-3.65231803407439
Q9H2U2	PPA2	-0.162869594392218	3.31357636723321	-2.56273562177886	0.0543800134518431	0.822903519863698	-3.65257473624925
P26440	IVD	-0.12733627087836	3.28510401152616	-2.52673652121886	0.0567012490706791	0.822903519863698	-3.65497865700716
Q8NF37	LPCAT1	-0.15395745228199	3.32146468311919	-2.50892193522636	0.0578904264476983	0.822903519863698	-3.65947071286266
Q8IYS1	PM20D2	-0.41501024350212	3.31867651800943	-2.51266504976345	0.0576382872632844	0.822903519863698	-3.66041677871476
Q9Y4A5	TRRAP	0.121091045688546	3.30853482513322	2.9304344698242	0.0358902630183729	0.822903519863698	-3.66291216162249
P48735	IDH2	-0.388351262721506	3.29850258826055	-2.67104021017104	0.0480103649418458	0.822903519863698	-3.66332168329752
O75616-1	ERAL1	-0.129593368517803	3.29375797468165	-2.49215377666836	0.0590350320264702	0.822903519863698	-3.66488602236466
P30038	ALDH4A1	-0.123268875729321	3.28073909690618	-2.53716821603207	0.0560174891794286	0.822903519863698	-3.66548255211122
P55081	MFAP1	0.124794484475197	3.32291697746012	2.50846133714164	0.0579215370237959	0.822903519863698	-3.66586082095422
Q9H1Z4	WDR13	-0.400581576870981	3.30556069776585	-2.50660744572051	0.0580469433940167	0.822903519863698	-3.67038296835848
Q9HBH1	PDF	-0.329085438892335	3.29558321278843	-2.99193255472955	0.0335507400403083	0.822903519863698	-3.67227754066823
Q9HAV7	GRPEL1	-0.114119226659146	3.29272538780132	-2.52162494775191	0.0570396687550987	0.822903519863698	-3.67621511429289
Q96C36	PYCR2	-0.126964955512735	3.2942081578435	-2.47831218254895	0.0599987466611203	0.822903519863698	-3.67711222750116
P00747	PLG	0.579168030748581	3.41803646709867	4.22408074767912	0.00986056421973757	0.822903519863698	-3.67876918174469
Q8WUF8	FAM172A	-0.173777675172753	3.32154275801381	-2.47615366725402	0.0601505939944202	0.822903519863698	-3.67907143523465
O75648-1	TRMU	-0.179945777326589	3.31773256291499	-2.49084038390956	0.0591257372532438	0.822903519863698	-3.68197926140027
Q6FIF0	ZFAND6	0.233836920676983	3.29735538182335	2.50290941593194	0.0582979953902851	0.822903519863698	-3.68242561209551
Q9NXA8-1	SIRT5	-0.225074415605459	3.31340284232232	-2.47169339319876	0.0604657128364939	0.822903519863698	-3.68323885192225
Q9Y320	TMX2	-0.147395127613496	3.3045657197051	-2.46819288707116	0.0607143015354338	0.822903519863698	-3.68656620524102
Q8N2G8-1	GHDC	-0.196352788914851	3.31551859485778	-2.46988794902209	0.0605937858881109	0.822903519863698	-3.68705508433419
Q9Y294	ASF1A	0.26896512935796	3.31898206849677	2.47271785117993	0.0603931737294853	0.822903519863698	-3.6929029564578
Q9UMY4-1	SNX12	-0.534838896635115	3.34639305757737	-2.49370726131122	0.0589279443046568	0.822903519863698	-3.70097594170313
Q9H2P0	ADNP	0.0777648877458666	3.33411109776242	2.83928724708215	0.0397054013529389	0.822903519863698	-3.70108478086155
Q6NVY1	HIBCH	-0.127616247020969	3.28913007118687	-2.49043613617726	0.0591536863369833	0.822903519863698	-3.7052657926498
Q9Y3B4	SF3B14; SF3B6	0.296981140035807	3.31405082325736	2.44760970939302	0.0621990382844714	0.822903519863698	-3.70553685932895
P62256	UBE2H	-0.597284985547863	3.35084701964576	-2.62083429354434	0.0508533383706906	0.822903519863698	-3.70613911227363
Q96FV2	SCRN2	-0.250065656998595	3.33939531314896	-2.66086633108924	0.0485718190597307	0.822903519863698	-3.70695543395089
Q96GK7	FAHD2A	-0.381262749264586	3.30946502645015	-2.45963297956177	0.0613269522461115	0.822903519863698	-3.7069645166484
Q9Y4F4-1	FAM179B; TOGARAM1	-0.280876228030824	3.38744201465685	-2.79754290420302	0.0416039808332743	0.822903519863698	-3.70768408492679
Q13242	SRSF9	-0.344257971995957	3.32592913208666	-2.4797754415369	0.0598960502289605	0.822903519863698	-3.7086442216282
Q5T5X7	BEND3	0.147031039698107	3.31842426784248	2.5122510151964	0.0576661170384014	0.822903519863698	-3.71214618968987
P27144	AK4; LOC100507855	-0.329171052167989	3.31949896248268	-2.48182840156636	0.0597522939988634	0.822903519863698	-3.71559855079631
Q8TED0	UTP15	0.101351951521121	3.33478989398502	2.50084648838136	0.0584385656745987	0.822903519863698	-3.71623199005252
P04062	GBA	0.269424636466513	3.31942865691619	2.43369533122808	0.0632254074225618	0.822903519863698	-3.72006675132927
O43678	NDUFA2	-0.329361762328663	3.30139943130732	-2.719938888397	0.0454112332218734	0.822903519863698	-3.72253502173089
Q9H2Y7	ZFP106; ZNF106	0.145151409430925	3.3309064546491	2.48683469844825	0.0594033303995305	0.822903519863698	-3.72605080630205
Q9BST9	RTKN	-0.18230139586215	3.3477592045993	-2.52990201263963	0.0564927892665814	0.822903519863698	-3.72654661656849
Q8WW59	SPRYD4	-0.299703556885795	3.33500005843359	-2.57351484300171	0.053705647270004	0.822903519863698	-3.72743330255969
Q9H0X9	OSBPL5	0.204702907893875	3.32267708127544	2.56275727224918	0.0543786495639534	0.822903519863698	-3.72789060669901
P57737-3	CORO7-PAM16; CORO7	-0.163640273262312	3.30793235926712	-2.49770492882989	0.0586533564787943	0.822903519863698	-3.73035541254653
O43463	SUV39H1	-0.267398310078332	3.29838024893354	-2.44083131045457	0.0626967214433806	0.822903519863698	-3.73168079878094
P61586	RHOA	-0.285998813304784	3.37010313138066	-2.42736017892106	0.0636988809372992	0.822903519863698	-3.7318061144645
P15104	GLUL	-0.160577109398628	3.309458983574	-2.43875834499999	0.0628497980813803	0.822903519863698	-3.73520144006833
Q9BQ67	GRWD1	-0.260658192905125	3.33562149656785	-2.4300964191589	0.0634939036045471	0.822903519863698	-3.73617657205958
P50914	RPL14	-0.18755169986789	3.32848956241317	-2.43526548606975	0.0631086585018112	0.822903519863698	-3.7376563253551
Q6P1N9-1	TATDN1	-0.335628838261509	3.34965306233071	-2.41397303352787	0.0647122998490387	0.822903519863698	-3.73810739587014
O15460-2	P4HA2	-0.156029772352463	3.37462494712019	-2.44038465398473	0.0627296696950271	0.822903519863698	-3.73921989717318
O00746	NME4	-0.407244609930928	3.31933550230416	-2.48452565440798	0.0595640013737317	0.822903519863698	-3.74100815397323
Q96S94	CCNL2	0.158265885283438	3.31488552420834	2.40764926250044	0.0651971753256801	0.822903519863698	-3.74150934191792
Q8N5N7	MRPL50	-0.38794999023751	3.31440556676412	-2.55285638558388	0.0550063473763129	0.822903519863698	-3.74531250461188
P04792	HSPB1	0.1316504725886	3.32155489314171	2.42161659955382	0.0641315189231608	0.822903519863698	-3.74810890108537
O75608	LYPLA1	-0.355424061659624	3.35058482302939	-2.467946137742	0.0607318670041858	0.822903519863698	-3.74812728210753
Q9BW92	TARS2	-0.116190774323854	3.30180761025877	-2.44918682852316	0.0620838689801884	0.822903519863698	-3.74835529969147
Q9UIS9-9	MBD1	-0.173799341092437	3.30383430379945	-2.47539882391644	0.0602037959424336	0.822903519863698	-3.74960502933898
Q9P2I0	CPSF2	0.0986874862413852	3.33205258741819	2.56010329120922	0.0545461227366802	0.822903519863698	-3.75116105670092
Q9NWU1-1	OXSM	-0.19335550343437	3.29793323753929	-2.42581834994724	0.0638147034932501	0.822903519863698	-3.75691892934826
Q96EY5-1	FAM125A; MVB12A	-0.484630126773996	3.3289911224634	-2.58733021692111	0.0528548938692501	0.822903519863698	-3.75821766870638
O75694	NUP155	0.163759176948831	3.313404616634	2.62934946362976	0.050358199069025	0.822903519863698	-3.76168335896602
Q8NG08	HELB	-0.20266949681082	3.36619296878409	-2.47783021950275	0.060032615045168	0.822903519863698	-3.76212410739963
O75152	ZC3H11A	0.1763516404237	3.31703933535928	2.58833754076145	0.0527934516655143	0.822903519863698	-3.76259207128832
Q5QJ74	TBCEL	-0.424233967918631	3.32970384313621	-2.38532779000747	0.066940878302842	0.822903519863698	-3.76302532788649
Q8NI77	KIF18A	0.124365204838443	3.30108590785749	2.44963794214765	0.062050969637865	0.822903519863698	-3.76690855563141
Q9BR77-1	CCDC77	0.125783911674328	3.37682904684038	2.37509549014418	0.0677572737044425	0.822903519863698	-3.76862215170415
Q7Z6M1-1	RABEPK	-0.12990724725551	3.29887044208688	-2.38753298193215	0.0667663529213781	0.822903519863698	-3.76915243159072
Q9BYD2	MRPL9	-0.164697428991698	3.26668636339017	-2.37580941619263	0.0676999590698645	0.822903519863698	-3.76941967192088
P62273-2	RPS29	-0.340799085361507	3.30535523795123	-2.38696358815798	0.0668113685116158	0.822903519863698	-3.77531464468274
Q9ULA0	DNPEP	-0.175218666463341	3.31569711925751	-2.37469519939455	0.0677894327069583	0.822903519863698	-3.77616660191669
P30519	HMOX2	-0.152028118555588	3.3156953505013	-2.37148850878414	0.0680476606825709	0.822903519863698	-3.77652704571887
O75935	DCTN3	-0.33710092789133	3.35981512808399	-2.36951110028201	0.0682074349948412	0.822903519863698	-3.77724772165478
P16402	HIST1H1D	-0.253250647212325	3.30836980412759	-2.43517944460929	0.0631150499612898	0.822903519863698	-3.78405735089807
Q5UIP0	RIF1	0.169011781511074	3.32020156981389	2.85776846628069	0.0388962037791151	0.822903519863698	-3.78666926996172
Q8NBL1	POGLUT1	0.126569906077232	3.31201300106275	2.35767182498363	0.0691726943440766	0.822903519863698	-3.78935148906912
Q96DV4	MRPL38	-0.204196154934524	3.27051419070489	-2.36016176341308	0.0689684520730812	0.822903519863698	-3.78956471462731
Q9NPA3	MID1IP1	-0.623365226689558	3.35229003797547	-2.35163425230667	0.0696706960867825	0.822903519863698	-3.79080743439211
Q96Q89-3	KIF20B	0.130949744756591	3.33751051569619	2.7318158388956	0.0448039835269268	0.822903519863698	-3.79138419991698
Q8TF39	ZNF483	-0.189548241219514	3.33414362533667	-2.38526684199868	0.0669457090174662	0.822903519863698	-3.79179071924042
Q9H488-1	POFUT1	-0.374021748454958	3.3386135670344	-2.35386282489678	0.0694864190930719	0.822903519863698	-3.79798913454249
P00519-2	ABL1	0.155020244452753	3.30795989142684	2.38115433809741	0.0672725504567998	0.822903519863698	-3.79926067595585
Q9UBQ7	GRHPR	-0.38006852706685	3.32838847750337	-2.38274330231962	0.0671460602095637	0.822903519863698	-3.79943028132945
P49189	ALDH9A1	-0.311757193046763	3.34182905519603	-2.40464836695311	0.0654286662494026	0.822903519863698	-3.80010247962205
O60507	TPST1	0.265166376357314	3.29733802478683	2.34907913484273	0.0698826335615142	0.822903519863698	-3.80467148991909
P63218	GNG5	-0.228383500450253	3.33747021234736	-2.44714777341603	0.0622328158181389	0.822903519863698	-3.80499157247951
Q8IWA0	WDR75	0.226742077307939	3.31713966854179	2.41525618468162	0.0646143991898429	0.822903519863698	-3.80697835605616
Q15286	RAB35	0.342478150106667	3.28725653353608	2.35705407903518	0.0692234687864401	0.822903519863698	-3.80799782217791
O75391	SPAG7	0.154210715024621	3.29523091683443	2.34581730326096	0.0701542170424714	0.822903519863698	-3.80803165290676
Q9BVS5	TRMT61B	-0.248229837749275	3.29762365062072	-2.32878102211498	0.0715915795998761	0.822903519863698	-3.8091417322424
Q9BTX7	TTPAL	0.36893329576053	3.14879824787151	2.90239340686389	0.0370179598473622	0.822903519863698	-3.81123693454297
P48047	ATP5O	-0.10435025755886	3.29281457421338	-2.37538767604747	0.0677338103191903	0.822903519863698	-3.81381137755327
O14908-1	GIPC1	-0.282048206679612	3.330011283279	-2.32926032614239	0.0715507027147396	0.822903519863698	-3.81735925646008
Q9Y3D3	MRPS16	-0.437832326541376	3.28710990897472	-2.55782148388936	0.0546905690048095	0.822903519863698	-3.81773786299443
P31930	UQCRC1	-0.162873470674664	3.26663232267185	-2.41585706674423	0.0645686097027403	0.822903519863698	-3.8181014436813
Q8N9N7	LRRC57	-0.397144991810153	3.33618456418663	-2.31791371965213	0.0725252705919411	0.822903519863698	-3.81981908899413
O94805	ACTL6B	-0.29506674778505	3.32115079693919	-2.32348583265619	0.0720448769146161	0.822903519863698	-3.8202534443781
Q8TE59	ADAMTS19	-0.786155516255808	3.39791683932332	-3.57588281871078	0.0182350399227987	0.822903519863698	-3.82162008965556
P34896-1	SHMT1	-0.211253645619762	3.32782992638298	-2.40888910917821	0.0651017959053279	0.822903519863698	-3.82348412223424
Q12996-1	CSTF3	0.116304597829935	3.31040353779301	2.51685949002008	0.0573571908544259	0.822903519863698	-3.82549563286538
Q3KQZ1-1	SLC25A35	-0.563368704786037	3.43437519604238	-3.40836255521382	0.0215995529154992	0.822903519863698	-3.82659402624301
Q9Y265	RUVBL1	0.0970510562755919	3.31876318921099	2.57551908323768	0.0535812865413402	0.822903519863698	-3.82727298927731
Q13740-1	ALCAM	0.241211770208864	3.2856810381466	2.30630885203525	0.0735370441280975	0.822903519863698	-3.828877089418
Q96PU8	QKI	0.157407503752926	3.33329522331168	2.34490759935723	0.0702301658957367	0.822903519863698	-3.83114881597138
Q96GD0	PDXP	-0.545826324852487	3.34127170875736	-2.30432753803797	0.073711320797824	0.822903519863698	-3.83169547684386
Q8TEA1	NSUN6	-0.281522559501496	3.33124872905604	-2.31159203281563	0.0730745298720071	0.822903519863698	-3.83293176802895
Q9NZ08-2	ERAP1	0.138375628113438	3.30333720684945	2.30789735500704	0.0733976440370354	0.822903519863698	-3.83372740548237
Q8IW45	CARKD; NAXD	-0.330838999917725	3.29946237942799	-2.32932037470588	0.071545583342424	0.822903519863698	-3.83450335745232
Q9H583	HEATR1	0.120848855712359	3.328512958186	2.6465816121709	0.0493725581347442	0.822903519863698	-3.83539671266334
P78540	ARG2	-0.301813639473791	3.28751846277249	-2.41504002870619	0.0646308798324688	0.822903519863698	-3.83935903927073
O75521	ECI2	-0.171684133246687	3.32108918534293	-2.29761572643688	0.0743050506431534	0.822903519863698	-3.84034767627734
Q15041	ARL6IP1	-0.345277130174195	3.33227664312182	-2.3419452560727	0.0704781088910105	0.822903519863698	-3.84207202491777
Q9BQA1	WDR77	-0.108369667548811	3.31171598521825	-2.33550183992811	0.0710207266707249	0.822903519863698	-3.84211578167253
Q9BVC3	DSCC1	-0.256817528286515	3.33167147621757	-2.29616912952881	0.0744336995332344	0.822903519863698	-3.84240237740196
Q9BZJ0-2	CRNKL1	0.125824874185455	3.33133872514743	2.46213589711518	0.0611471099037986	0.822903519863698	-3.84383901267908
Q96N64	PWWP2A	0.266232638477638	3.29764056052432	2.29873778187532	0.0742054309407419	0.822903519863698	-3.84416039379566
P50607-2	TUB	-0.156528901836884	3.31587060635481	-2.28744519208972	0.0752147055970556	0.822903519863698	-3.8451155627889
Q96KG9	SCYL1	0.1006081544105	3.26931574547809	2.32498325137849	0.0719163722602717	0.822903519863698	-3.84536867636258
Q96SZ6-3	CDK5RAP1	-0.152470946505083	3.30087968673872	-2.3268596919761	0.0717556945427507	0.822903519863698	-3.84586405632088
Q9Y366	IFT52	-0.318619239885148	3.31903292232894	-2.36073974088502	0.0689211368791649	0.822903519863698	-3.8510719664573
Q16254	E2F4	0.186318611482412	3.30206062295502	2.29565070246079	0.0744798634580985	0.822903519863698	-3.85145498586354
Q14197	ICT1; MRPL58	-0.177069296988362	3.29967106353633	-2.29420878351757	0.0746084250539292	0.822903519863698	-3.85150031292961
O00217	NDUFS8	-0.154565922231047	3.30895367275028	-2.28486027479748	0.0754478313700164	0.822903519863698	-3.85286709868289
O15160	POLR1C	-0.336127732536207	3.32090116225278	-2.27598442510002	0.0762543294500756	0.822903519863698	-3.85532486427263
Q15363	TMED2	0.133899642215062	3.31106025972402	2.31837485390445	0.0724853818386999	0.822903519863698	-3.85769506407975
P50583	NUDT2	-0.337630337622409	3.33995111618607	-2.33614546843919	0.0709663199604731	0.822903519863698	-3.85828880184276
Q96SI1-1	KCTD15	-0.448748902526251	3.35799157742837	-2.27395366580424	0.0764401699738155	0.822903519863698	-3.85842490332949
O14497	ARID1A	0.105175450952828	3.31426007973545	2.72816631552832	0.0449896031052721	0.822903519863698	-3.859046354495
Q86UE4	MTDH	-0.11936379986147	3.3181751537832	-2.43827310417512	0.0628856898199168	0.822903519863698	-3.85967167979934
Q5HYW2	NHSL2	0.159011616857988	3.31957358627177	2.26721262871293	0.0770606048557961	0.822903519863698	-3.86270183560221
Q7Z5Q1-9	CPEB2	-0.434663861645706	3.29866268009102	-2.33803802973446	0.0708066034601309	0.822903519863698	-3.86275629943013
Q86TN4	TRPT1	-0.899257931202115	3.2983605791591	-2.29373985264876	0.0746502871007633	0.822903519863698	-3.86358576442909
Q8TCA0-1	LRRC20	-0.637973153875687	3.34894187767038	-2.29828138947304	0.0742459333405236	0.822903519863698	-3.86427120496205
Q8IWL3	HSCB	-0.218783948884801	3.30176761568804	-2.27742063188623	0.0761231951506214	0.822903519863698	-3.86865628770066
P51553-1	IDH3G	-0.142185684517555	3.28541769342831	-2.26006444277094	0.0777245049261439	0.822903519863698	-3.87005971858744
Q9BRT9	GINS4	-0.19470015912968	3.31864199604806	-2.32266213313063	0.072115671701057	0.822903519863698	-3.87063247931202
O60613-1	SEP15; SELENOF	-0.345331304182936	3.35516849869576	-2.43062377780416	0.0634544816719214	0.822903519863698	-3.87564729045526
Q9NWT6	HIF1AN	0.13301288160292	3.33497128130737	2.25221091566846	0.0784610939103006	0.822903519863698	-3.87670538715537
P62253	UBE2G1	-0.427870898388414	3.34102671940795	-2.25219483350466	0.0784626100334507	0.822903519863698	-3.87725425033118
Q5BJF6	ODF2	0.147178345084929	3.3270286746897	2.28290351456033	0.0756248292326356	0.822903519863698	-3.87778795982609
O15116	LSM1	-0.219144249791322	3.32411547916338	-2.25663720403545	0.0780450198493923	0.822903519863698	-3.88069063813095
O95372	LYPLA2	-0.783685317925623	3.35437415018975	-2.24607536379394	0.0790418317658503	0.822903519863698	-3.88206756570518
Q86U28	ISCA2	-0.221630370199493	3.33139281733295	-2.34087312746507	0.070568080226379	0.822903519863698	-3.88313793474612
Q9BYG5	PARD6B	-0.428022248813087	3.33885965445648	-2.27264262888431	0.0765604085882099	0.822903519863698	-3.88350559096577
Q15059	BRD3	0.13405016721485	3.47858637370751	2.33633209398377	0.0709505528033634	0.822903519863698	-3.8858622857838
Q9NWV4	C1orf123	-0.163210301737621	3.33212978970019	-2.24058687722967	0.0795652820603407	0.822903519863698	-3.88687442825642
O75439	PMPCB	-0.108761415701928	3.29180915236401	-2.36085681936694	0.0689115567725894	0.822903519863698	-3.88860590111689
P25490	YY1	0.150124287644369	3.30432802185026	2.24570166356361	0.0790773535418115	0.822903519863698	-3.89141645211365
Q96NC0	ZMAT2	0.236003119805341	3.29839890941553	2.3005014353674	0.0740491424801538	0.822903519863698	-3.89227811274525
Q9H098-2	FAM107B	0.226004597410346	3.31959236536659	2.2359795730234	0.0800075983297527	0.822903519863698	-3.89318713971538
O43491-1	EPB41L2	0.121521176760003	3.31071473953996	2.58302828860636	0.053118189159296	0.822903519863698	-3.89338748088287
Q99598	TSNAX	-0.19024414001858	3.33846203194334	-2.41249297848354	0.0648254264744419	0.822903519863698	-3.89476640793546
Q6UN15-1	FIP1L1	0.136605115476409	3.32994679298772	2.27071257806687	0.0767377934228888	0.822903519863698	-3.89605933207693
Q9HBM1	SPC25	-0.450144904529137	3.35315321751949	-2.2356019864623	0.0800439660311519	0.822903519863698	-3.89618705133963
Q02218	OGDH	-0.164416574299401	3.29678123151553	-2.46068293791165	0.0612514384970843	0.822903519863698	-3.89765654835862
Q9Y4Z0	LSM4	-0.339039062230613	3.33400245405825	-2.22560022012076	0.0810138581736533	0.822903519863698	-3.898475354927
P49902	NT5C2	0.216969716367077	3.31498694535589	2.23459510137858	0.0801410331129072	0.822903519863698	-3.89991613135391
O60927	PPP1R11	0.311921841914191	3.26044393637599	2.23638678076279	0.0799683977276071	0.822903519863698	-3.90039749346932
Q9H7Z7	PTGES2	-0.169146783039621	3.32630174374268	-2.22600985130859	0.0809738859936847	0.822903519863698	-3.90358620122057
Q9GZT4	SRR	-0.232441268514635	3.32332572678959	-2.26682174284124	0.0770967491427895	0.822903519863698	-3.90594284301937
Q8NI36	WDR36	0.117729548875292	3.32280767190822	2.41170677277695	0.0648856078583198	0.822903519863698	-3.90610451270641
Q676U5	ATG16L1	-0.171186236878608	3.32857147137289	-2.26406802141875	0.0773519025382242	0.822903519863698	-3.90698169601668
Q8NBJ5	COLGALT1; GLT25D1	0.126032405278286	3.31506408513995	2.33649121080489	0.0709371127623739	0.822903519863698	-3.90745531443316
Q13162	PRDX4	0.14238360971961	3.32294811055382	2.32345167849876	0.072047810863606	0.822903519863698	-3.90896930908247
P08559-4	PDHA1	-0.106714145646189	3.28975612895092	-2.29673224549299	0.0743835915938451	0.822903519863698	-3.91148468603799
Q32P41	TRMT5	-0.254104705965965	3.34000205645034	-2.29802997692037	0.0742682551697522	0.822903519863698	-3.91416319278939
Q9Y653	GPR56; ADGRG1	0.146611918178496	3.31268869482217	2.20883064138481	0.0826687508990494	0.822903519863698	-3.9143823674393
O43148-2	RNMT	0.0773112370335376	3.3348119003534	2.39386078366122	0.0662683208671101	0.822903519863698	-3.91448194939628
Q1KMD3	HNRNPUL2	0.0598581869710057	3.30608615678993	2.72815382830505	0.0449902397009659	0.822903519863698	-3.91503439413223
Q9BRA0-2	LSMD1; NAA38	-0.263751485434242	3.3496639994731	-2.36275716374571	0.0687562624749963	0.822903519863698	-3.91577070376998
Q9UJX4	ANAPC5	0.159850203506466	3.30427546117401	2.35753380149508	0.0691840353778427	0.822903519863698	-3.91624587884309
P50213-1	IDH3A	-0.118499754215327	3.28809941661696	-2.24566360306363	0.0790809723250192	0.822903519863698	-3.91854055045501
O95336	PGLS	-0.738661142762446	3.3292946085787	-2.20569990829777	0.0829817420949138	0.822903519863698	-3.91991386534637
P98173-1	FAM3A	0.327485485585294	3.33074222013523	2.80737275340836	0.0411478697966885	0.822903519863698	-3.92126796709413
Q5JWR5	DOPEY1	0.395186381908527	3.29700105405577	2.20667472844521	0.0828841483242965	0.822903519863698	-3.92288694301966
Q75T13	PGAP1	-0.168120462850316	3.31959213576963	-2.20859651855299	0.0826921127669303	0.822903519863698	-3.92450122766419
P07203	GPX1	-0.643892254697578	3.27630518796635	-2.96137895372921	0.0346907183229829	0.822903519863698	-3.92620090071796
Q6P1J9	CDC73	0.0851934407881641	3.34463987056392	2.32920230606542	0.0715556495312603	0.822903519863698	-3.92626900586575
P21953	BCKDHB	-0.219965035688543	3.26915500786662	-2.29426828456362	0.0746031151515101	0.822903519863698	-3.92660170088561
Q6UXH1-5	CRELD2	0.242203707111638	3.31128551565785	2.22716831673223	0.0808609576230186	0.822903519863698	-3.926772232055
Q92854-1	SEMA4D	0.12925580270959	3.29836817739991	2.22908362526347	0.0806746259056618	0.822903519863698	-3.92963021167068
Q5VUA4	ZNF318	0.130234845882989	3.32802103418842	2.43640297425499	0.0630242289337342	0.822903519863698	-3.93133851677371
O43684	BUB3	-0.54229108015794	3.33471687973799	-2.33478881981739	0.0710810524262611	0.822903519863698	-3.93135685374564
O43353-1	RIPK2	0.283282472575362	3.19254476039374	2.38507416076752	0.0669609833726341	0.822903519863698	-3.93274925468521
Q96TC7	FAM82A2; RMDN3	-0.131387313521016	3.31725483944763	-2.24150333650152	0.0794776159328693	0.822903519863698	-3.93315214416205
Q99798	ACO2	-0.0975056574088506	3.28877260374074	-2.47101287012607	0.0605139520482649	0.822903519863698	-3.93362479732869
Q9NPD8	UBE2T	-0.583217624401112	3.34340804163993	-2.20640744327172	0.0829108951137719	0.822903519863698	-3.93412314493914
P07199	CENPB	0.207099928702125	3.3112157015371	2.21261328251859	0.0822922902760075	0.822903519863698	-3.93563065552042
P07741-1	APRT	-0.652905732334284	3.37869022888627	-2.20385006269992	0.0831672808960067	0.822903519863698	-3.93620006224502
Q9Y244	POMP	-0.767148312470997	3.33980123851794	-2.35373096773096	0.069497307269387	0.822903519863698	-3.93652281028766
O75953-5	DNAJB5	-0.22594008348702	3.32571179556568	-2.18576463560804	0.0850050702188872	0.822903519863698	-3.93746718217231
Q9Y303	AMDHD2	-0.284289460256031	3.33664429173073	-2.21093643392387	0.082458946050395	0.822903519863698	-3.93864171423996
Q9BU61-1	NDUFAF3	-0.413916307146351	3.30462665703985	-2.50528632968884	0.0581364936764977	0.822903519863698	-3.94112883048824
O96000	NDUFB10	-0.323815465493596	3.29335447482339	-2.18757999622473	0.084818630853763	0.822903519863698	-3.94315787642892
Q8IUF8	MINA; RIOX2	-0.332754920202544	3.34632569818068	-2.23247994581543	0.0803453574476536	0.822903519863698	-3.94325513543584
P02786	TFRC	0.114318827395798	3.31167973679287	2.5800325094068	0.0533024048028285	0.822903519863698	-3.94426725657926
P28070	PSMB4	0.213417508790928	3.32057662045939	2.32013515870782	0.0723333333029208	0.822903519863698	-3.94454021004613
Q9Y2Y0	ARL2BP	0.132690165310432	3.32414038791434	2.19032093190581	0.0845379708908172	0.822903519863698	-3.94527921693513
Q719H9	KCTD1	-0.422059765683973	3.32631871360323	-2.48760119244666	0.0593501012001036	0.822903519863698	-3.94556050430239
P16278	GLB1	0.148027396424738	3.31823632643813	2.19070028745499	0.0844992056746775	0.822903519863698	-3.94563033737681
Q99653	CHP1	-0.313078721557121	3.34902029675906	-2.3022457591483	0.07389492016558	0.822903519863698	-3.94568823511115
Q9UJX5-3	ANAPC4	0.135654653406985	3.29904521423056	2.24330025391932	0.0793060317438028	0.822903519863698	-3.94615934988915
Q96AY3	FKBP10	0.123940801970009	3.31050889671412	2.33971421740949	0.070665475539147	0.822903519863698	-3.94696705129659
Q7Z4G1-2	COMMD6	-0.569934716769769	3.32921471320139	-2.35072760443453	0.0697458184536257	0.822903519863698	-3.94699263921264
P20839-6	IMPDH1	-0.140310426392004	3.33695518114691	-2.21321596050944	0.0822324814967875	0.822903519863698	-3.94862420501671
Q8N3C0	ASCC3	0.139707689452023	3.29625159396259	2.5855390107675	0.0529643460169964	0.822903519863698	-3.94874044069952
Q5JTD0-2	TJAP1	0.179247791155928	3.33794257068593	2.16435160654929	0.0872379236467182	0.822903519863698	-3.9506011262216
P29083	GTF2E1	0.117969690490699	3.31137120597225	2.22459244914499	0.0811122884749684	0.822903519863698	-3.95086809726887
Q8N0Y2-1	ZNF444	-0.299130553240785	3.31409628233694	-2.36903169547713	0.0682462327806504	0.822903519863698	-3.95259386214221
A6NHT5	HMX3	-0.250888730933037	3.32466770418875	-2.26884990092525	0.0769094104445646	0.822903519863698	-3.9557521137424
P14174	MIF	-0.83116943185442	3.35006238933429	-2.21220620047783	0.082332715093563	0.822903519863698	-3.95797577536605
Q9UGU0	TCF20	0.0992838891595648	3.30999262530661	2.46971794010443	0.0606058612648194	0.822903519863698	-3.95975255915358
Q96F85-1	CNRIP1	-0.629909023180062	3.36054231039975	-2.16093313011185	0.0876002080089121	0.822903519863698	-3.96009106053002
Q16537	PPP2R5E	0.168633644467443	3.32971068626972	2.15269168181825	0.0884803083849012	0.822903519863698	-3.96661765441904
Q99627-1	COPS8	-0.227141442251125	3.33720956341553	-2.15086108185708	0.0886770876431749	0.822903519863698	-3.9686490847683
Q9NRV9	HEBP1	-0.585039475481009	3.31149379007793	-2.15723116571523	0.0879943662293779	0.822903519863698	-3.96937811891958
Q9BUR4	WRAP53	-0.327085175766809	3.30991550145486	-2.15242123589871	0.0885093501703587	0.822903519863698	-3.96943203834366
O60476	MAN1A2	0.185958545217352	3.30462557164545	2.18065722212172	0.0855319862054233	0.822903519863698	-3.97059810687983
Q9Y4X5	ARIH1	0.135307710638636	3.31936881029472	2.24905596576695	0.0787591327521227	0.822903519863698	-3.97159780447331
P51610-4	HCFC1	0.106539764980477	3.32245238835751	2.59553346580451	0.0523568382239157	0.822903519863698	-3.97253111813178
P04632	CAPNS1	-0.216986395544251	3.33664412737546	-2.14297007577204	0.0895307375497121	0.822903519863698	-3.97285218305333
Q9NR50-1	EIF2B3	-0.20502197025714	3.33939685881385	-2.29242330575172	0.07476795386351	0.822903519863698	-3.97355650975273
Q70E73	RAPH1	0.115896363717658	3.31678447808209	2.30894283082525	0.0733060550749738	0.822903519863698	-3.97619895027105
O00487	PSMD14	-0.179771848454421	3.33123079047221	-2.27343803311008	0.0764874354460541	0.822903519863698	-3.97684490189661
Q9NV35	NUDT15	-0.686848193925184	3.31842821932602	-2.20938510371526	0.0826134525618463	0.822903519863698	-3.97703064973345
P35914	HMGCL	-0.178139495604656	3.29748724606569	-2.13418801774368	0.090491193009555	0.822903519863698	-3.97811175923643
P82932	MRPS6	-0.150223198970745	3.32550808607247	-2.13970418585718	0.0898866265183043	0.822903519863698	-3.97969562713061
O60942-1	RNGTT	-0.17961853441408	3.31817164572099	-2.20380541726956	0.0831717643611854	0.822903519863698	-3.98016687468745
Q15293	RCN1	0.0924077951874104	3.31566589051478	2.30122393607434	0.0739852208696107	0.822903519863698	-3.98120059938969
Q9H2H8-1	PPIL3	-0.599158864682157	3.33369561886749	-2.22820337209031	0.0807602038631678	0.822903519863698	-3.98132748098293
P0C0L4-1	C4A; C4B	0.220012783370026	3.37530105091455	2.22279370094888	0.0812882969752315	0.822903519863698	-3.98252771744248
P30043	BLVRB	-0.281470983833985	3.3180236352456	-2.18310228231984	0.0852792979972943	0.822903519863698	-3.98403899032577
Q6UB28	METAP1D	-0.239738431327119	3.26282355460891	-2.19352558918896	0.0842111003437059	0.822903519863698	-3.98506715305059
P49790-3	NUP153	0.133596876932635	3.32691203601352	2.45194114840117	0.0618832982191682	0.822903519863698	-3.98518434601014
Q9Y6Q3-1	ZFP37	-0.270810570846379	3.29195780186678	-2.34413180292686	0.0702950062823427	0.822903519863698	-3.98797281852092
Q9UBW7	ZMYM2	0.111123573743306	3.34866488326899	2.48295202049124	0.0596737753863849	0.822903519863698	-3.98924702533841
P50336	PPOX	-0.217507198799769	3.26433340190641	-2.13237074741919	0.0906913206224784	0.822903519863698	-3.98937039985793
Q93074-2	MED12	0.0781568674545658	3.32430333133177	2.44404553960057	0.0624601811942334	0.822903519863698	-3.99074147164453
Q8TDM0-3	BCAS4	-0.463896815884002	3.31030170520062	-2.48429161361104	0.0595803135157898	0.822903519863698	-3.99086469637825
Q9Y4C1	KDM3A	-0.11907999670058	3.3621928805107	-2.30693720258532	0.073481868302287	0.822903519863698	-3.99098804395837
O95396	MOCS3	-0.175378951343104	3.32428334782539	-2.16259123493926	0.0874242826595582	0.822903519863698	-3.99208985049928
Q92905	COPS5	0.224167143065124	3.31989892128613	2.26408318246914	0.077350495238022	0.822903519863698	-3.99242481323011
Q14119	VEZF1	-0.147984397101136	3.31938355093223	-2.11486965003532	0.0926431679255504	0.822903519863698	-3.99244420693816
Q9ULI0	ATAD2B	0.100001545004674	3.30846611323307	2.28579856525297	0.0753631189073507	0.822903519863698	-3.99248816359523
O15392	BIRC5	-0.355439857640011	3.3043950523657	-2.22380020032935	0.081189759487775	0.822903519863698	-3.99289250836132
P55273	CDKN2D	-0.337534581077064	3.29558635092762	-2.38516137885928	0.0669540688877946	0.822903519863698	-3.9929709745583
P38398	BRCA1	0.117988801404597	3.31722084317691	2.35131025132163	0.0696975317411435	0.822903519863698	-3.99320914901125
Q14249	ENDOG	-0.1121317718893	3.30230089697128	-2.12626055413096	0.0913677053801185	0.822903519863698	-3.99368429994068
O75530	EED	0.143937941058965	3.32334242715853	2.23127338103112	0.08046216491404	0.822903519863698	-3.99384658351125
Q15819	UBE2V2	-0.275790940966143	3.32730328755306	-2.11743988101846	0.0923537125694011	0.822903519863698	-3.99391697784747
Q14353-1	GAMT	-0.739381813388195	3.33730975652877	-2.28257487718717	0.0756546003287937	0.822903519863698	-3.99404172955348
Q8IYQ7	THNSL1	-0.118065137021647	3.2926448489152	-2.16666331935398	0.0869938482205372	0.822903519863698	-3.99429662176448
Q9UIW2	PLXNA1	0.123131992982289	3.3070413050824	2.29735877280302	0.0743278843408243	0.822903519863698	-3.99432343816598
Q96SW2-1	CRBN	0.103887956612623	3.31100872600556	2.13995240550602	0.0898595242618585	0.822903519863698	-3.99506006081008
Q99700-1	ATXN2	0.107622504798416	3.3108643495687	2.38547341115905	0.066929337978915	0.822903519863698	-3.99767408807905
Q2M2I8-1	AAK1	0.113702485507478	3.30660014704718	2.19315858272338	0.08424846510555	0.822903519863698	-3.99963632155605
Q9BW83-1	IFT27	-0.320585060677607	3.34411373649742	-2.11209342571335	0.0929569163502681	0.822903519863698	-3.99990437285514
Q16864-2	ATP6V1F	-0.693942339968744	3.32180150314406	-2.10483998909329	0.0937820397681371	0.822903519863698	-4.000616040263
Q8NC56-1	LEMD2	-0.113770027044948	3.30900157437996	-2.10981695689648	0.0932150369981572	0.822903519863698	-4.00097043963939
Q15393-1	SF3B3	0.113775017481646	3.31604873776104	2.69137498296754	0.0469097932203187	0.822903519863698	-4.00334247586817
Q96HA8	WDYHV1	-0.309090731072445	3.3236367120738	-2.11558585238388	0.0925624125878848	0.822903519863698	-4.00483128919979
Q96DC8	ECHDC3	-0.213997370213148	3.28290104649204	-2.14020536472448	0.0898319135544852	0.822903519863698	-4.00492547638917
Q96BN2	TADA1	-0.183745554980705	3.34222866618317	-2.09990202259209	0.0943482562005497	0.822903519863698	-4.00595718154038
Q9NRX4	PHPT1	0.134330908737479	3.31371148386671	2.15837182639616	0.0878727135934384	0.822903519863698	-4.008657672413
Q9ULC4-3	MCTS1	-0.127426005787615	3.3256632068838	-2.11041251225913	0.0931474349080672	0.822903519863698	-4.00877440269102
P25054-1	APC	0.0997537926276647	3.31591404499648	2.29713356881889	0.0743479029601603	0.822903519863698	-4.00917442199889
Q9P0J1-2	PDP1	-0.158924665140418	3.30047367431392	-2.11208990165541	0.0929573153373085	0.822903519863698	-4.00939367799163
Q9H7X7	RABL5; IFT22	-0.352465590846914	3.33337853812577	-2.16149488723419	0.0875405627165184	0.822903519863698	-4.01029771986664
Q03252	LMNB2	0.102666167916223	3.32484032485815	2.46586356048824	0.0608803442858243	0.822903519863698	-4.01200869995463
Q96DH6-1	MSI2	-0.220527929839657	3.33161844476755	-2.11898684198318	0.0921799644857433	0.822903519863698	-4.01206011150924
Q9ULX3	NOB1	-0.123248587118645	3.32451582218805	-2.11317243486991	0.0928348394040566	0.822903519863698	-4.01298633330158
Q14168-4	MPP2	-0.203372683053041	3.32719891327169	-2.22765587284842	0.0808134812439022	0.822903519863698	-4.01399388614958
Q96MG7	NDNL2; NSMCE3	0.185246135167192	3.30932756786416	2.14898733325962	0.0888789934318284	0.822903519863698	-4.01439796918405
Q7LBR1	CHMP1B	0.198134813056422	3.32624291097877	2.13307637238182	0.0906135569271254	0.822903519863698	-4.01646084275555
Q14146	URB2	0.174003995692093	3.30951780971809	2.23638293998416	0.0799687673698271	0.822903519863698	-4.01779857707295
Q92797-1	SYMPK	0.162832627236034	3.31352206860213	2.36067954048797	0.0689260634271561	0.822903519863698	-4.01847712566176
Q4G0N4	NADK2; NADKD1	-0.136179710869165	3.29452904588703	-2.08358814107245	0.0962450934841293	0.822903519863698	-4.01850187089994
Q8TAD4-1	SLC30A5	0.147775208972292	3.29928753320757	2.08193822246943	0.0964391930331041	0.822903519863698	-4.02050343984635
Q6ZSZ5	ARHGEF18	0.110023518898004	3.30020707911189	2.179534849327	0.0856482501366238	0.822903519863698	-4.02116662873136
P36405	ARL3	-0.278101019975588	3.35327281179206	-2.10308098819635	0.0939833183293978	0.822903519863698	-4.02284521418122
Q96CX6	LRRC58	-0.303291767787208	3.3523340865152	-2.21856510467319	0.0817037003474229	0.822903519863698	-4.02319471075424
Q96DA6	DNAJC19	-0.163198573117071	3.28983439177749	-2.09102435589648	0.0953754577063332	0.822903519863698	-4.02390374596998
Q9NRS6	SNX15	-0.237939716496649	3.31302959167086	-2.10045150321174	0.0942850686621836	0.822903519863698	-4.02400088737358
Q9NVZ3	NECAP2	-0.177281392661478	3.32477273938059	-2.07589158221597	0.0971541187027067	0.822903519863698	-4.02448633217442
Q969Y2-2	GTPBP3	-0.150813473781123	3.28772989129419	-2.07890365374689	0.09679727983351	0.822903519863698	-4.0278475154783
Q13547	HDAC1	0.0698037960872448	3.31982659506144	2.39628686390629	0.0660784589994391	0.822903519863698	-4.0278736841578
Q9H1X3-3	DNAJC25-GNG10; DNAJC25	-0.266829063237447	3.36111957170993	-2.28498512180767	0.0754365537200207	0.822903519863698	-4.02794093276276
O95571	ETHE1	-0.343965625155067	3.27359271954421	-2.20723216059877	0.0828283970526153	0.822903519863698	-4.02903390056379
Q99622	C12orf57	-0.24197552345333	3.44535483503673	-2.22570966202469	0.0810031766398648	0.822903519863698	-4.03031718808213
Q9BYB4-1	GNB1L	-0.244162827605358	3.3318119727616	-2.08780899544694	0.0957504445756041	0.822903519863698	-4.03076315116704
Q16134	ETFDH	-0.127999713817145	3.26392903766521	-2.13750959316131	0.0901266295993527	0.822903519863698	-4.03328272402318
Q9Y6H3	XRCC6BP1; ATP23	0.169530327904735	3.29917218695908	2.11589658749227	0.0925273991848681	0.822903519863698	-4.03395445151889
O94876	TMCC1	-0.243475069599547	3.28151443607088	-2.16765308924494	0.0868895715636735	0.822903519863698	-4.0387404366768
Q96EK9	KTI12	-0.20302553407114	3.32332109727668	-2.10346931100598	0.0939388436033313	0.822903519863698	-4.03923601442578
O43829	ZBTB14; ZFP161	0.162485525818262	3.32364783317524	2.06722160622553	0.0981891201260511	0.822903519863698	-4.03938120782416
Q53H80	AKIRIN2	-0.401482788080329	3.33628092242053	-2.07311236410756	0.0974846194741508	0.822903519863698	-4.0393968548409
O43488	AKR7A2	-0.212827451399951	3.3326922667777	-2.07038776442362	0.0978097920579536	0.822903519863698	-4.04025042889228
Q8NFH3	NUP43	-0.44201017515242	3.33709239854526	-2.08684158099042	0.0958635766048972	0.822903519863698	-4.04034688543157
Q9H9B1	EHMT1	0.0631430885801739	3.32416910161828	2.37600025529808	0.0676846473456497	0.822903519863698	-4.0413394682275
Q8TDP1	RNASEH2C	-0.470247730963831	3.32650013952033	-2.40635738083503	0.0652967212600889	0.822903519863698	-4.04210358819655
Q16566	CAMK4	0.0825895919934843	3.334825052315	2.30247616692038	0.0738745751567703	0.822903519863698	-4.04308940911061
Q96FV9-1	THOC1	0.209502809678474	3.31956013007443	2.25274595925537	0.0784106715826789	0.822903519863698	-4.045614271809
Q9ULR0-1	ISY1-RAB43; RAB43; ISY1	0.244172036941191	3.33293309632066	2.11327256651418	0.0928235194371202	0.822903519863698	-4.04603160164492
O15111	CHUK	0.165677660791107	3.2866560812005	2.18060524306875	0.0855373668260026	0.822903519863698	-4.04688396580796
Q9Y2Q5-2	LAMTOR2	-0.310779259413659	3.33402261340126	-2.05897248907389	0.0991848226020936	0.822903519863698	-4.0484885688399
Q7L9L4-2	MOB1B	0.177838463154515	3.29114335172679	2.04723038183365	0.10062077470739	0.822903519863698	-4.049334553283
Q12834	CDC20	-0.208405580047863	3.3537244241227	-2.04368338291755	0.101058888013316	0.822903519863698	-4.05280738367189
Q16342-1	PDCD2	-0.255016194162422	3.29883410101034	-2.05240554814004	0.0999851847532118	0.822903519863698	-4.05356850725105
Q10471	GALNT2	0.217372362046033	3.31604217283531	2.2975235995642	0.074313236443035	0.822903519863698	-4.05436542160147
Q96HP4	OXNAD1	-0.326623423902362	3.32283167723821	-2.06379635778093	0.0986012596044813	0.822903519863698	-4.05509674876449
Q96GX2	ATXN7L3B	0.420704529133822	3.30728713075377	2.19558900331702	0.0840013584235358	0.822903519863698	-4.05606829175253
Q8WU76-1	SCFD2	0.212412911856806	3.32101468733841	2.03727058635565	0.101856143319836	0.822903519863698	-4.05729631454848
Q8WUM0	NUP133	0.107662172303568	3.31531885982936	2.36270239485392	0.0687607327624703	0.822903519863698	-4.05754370706845
Q5HYK3-1	COQ5	-0.166531847893621	3.28119422150174	-2.04445049460859	0.100963964940639	0.822903519863698	-4.05764583263336
Q9P273	TENM3	0.126881424187074	3.28720814834741	2.15940995985107	0.0877621531604885	0.822903519863698	-4.0586097429893
Q9P0U3-1	SENP1	0.129229360702576	3.30855209347164	2.12524294803537	0.0914808778380422	0.822903519863698	-4.05936984774239
Q9HBU6-1	ETNK1	0.187693936915295	3.31073108040783	2.03334346984332	0.102347677879734	0.822903519863698	-4.05956241880262
Q7Z589-5	C11orf30; EMSY	0.114126727800909	3.31735403864681	2.24651309814758	0.0790002453190636	0.822903519863698	-4.05976948360667
P55265-1	ADAR	0.126547318845299	3.31411797681229	2.59142598844169	0.0526055652686905	0.822903519863698	-4.06027092053238
P30260-2	CDC27	0.145443436196372	3.32389313233909	2.24593891555938	0.0790547997340662	0.822903519863698	-4.06051203240586
Q5SRE5	NUP188	0.121773452009759	3.32188226468765	2.39868849168123	0.0658910994307391	0.822903519863698	-4.06107039424371
Q969S9	GFM2	-0.136908093195683	3.29065139340374	-2.11760736728435	0.0923348842588743	0.822903519863698	-4.06171145759846
Q68CZ6	HAUS3	-0.168803383443244	3.34395891206914	-2.09214907937885	0.0952446599452107	0.822903519863698	-4.06174119144512
Q04760-1	GLO1	-0.328405740983103	3.3161523558305	-2.15600105367748	0.0881257624057279	0.822903519863698	-4.06217040522125
Q9NZ43-1	USE1	-0.417073146627587	3.29911668424486	-2.08793077442047	0.0957362135493143	0.822903519863698	-4.06262810185288
Q9Y2Q9	MRPS28	-0.248992748678347	3.28125960088732	-2.03505533078773	0.102133104276877	0.822903519863698	-4.06351949001515
Q99807-1	COQ7	-0.1507080018358	3.3001446928009	-2.02848272512555	0.102959568988009	0.822903519863698	-4.06359769347358
Q8WVJ2	NUDCD2	-0.455604391495201	3.34611218931887	-2.03423963869616	0.102235287589073	0.822903519863698	-4.06376159019321
Q9HC36	RNMTL1; MRM3	-0.138404438027965	3.26246065457035	-2.0288204477676	0.102916929431936	0.822903519863698	-4.06462413271582
Q9BVC4	MLST8	-0.37512644255978	3.33355631886806	-2.0268551961072	0.103165318238906	0.822903519863698	-4.06472467721122
Q86TX2	ACOT1	-0.174699396955623	3.31121780018582	-2.0241803724793	0.103504415306068	0.822903519863698	-4.06744131043181
Q9HCJ6	VAT1L	0.159080533143188	3.31481850378874	2.13329502025148	0.0905894753004555	0.822903519863698	-4.06781769746875
P52948-1	NUP98	0.149519862958831	3.3158683840474	2.45763646078121	0.0614708269619234	0.822903519863698	-4.06877345299422
P29992	GNA11	0.0978369167192574	3.32844881740708	2.10511252954816	0.0937508949524288	0.822903519863698	-4.06887236075859
Q13627-2	DYRK1A	0.132229611710367	3.3197855545119	2.1198281329132	0.092085621650052	0.822903519863698	-4.06896076774925
Q9HA64	FN3KRP	-0.223438030194892	3.33783431286469	-2.02502614669794	0.103397065457895	0.822903519863698	-4.06926158024633
Q9C0C4	SEMA4C	0.121422161843768	3.30961406144252	2.10091481670217	0.0942318251655463	0.822903519863698	-4.06964898273723
Q9BSV6	TSEN34	-0.200478640190813	3.32591178068177	-2.0226455586846	0.103699524308586	0.822903519863698	-4.07071023034564
Q9UDW3	ZMAT5	-0.363503056213003	3.34224174011783	-2.07235026879073	0.0975754566385117	0.822903519863698	-4.07230101154367
Q9BUN8	DERL1	-0.205814084532677	3.30242704285894	-2.08716961745828	0.0958251991180321	0.822903519863698	-4.07299113511244
Q86U90	YRDC	-0.397339700741156	3.33778984777436	-2.0508873140632	0.100171202224462	0.822903519863698	-4.07303966152597
Q9H3H3-2	C11orf68	-0.520484412030063	3.36427975870777	-2.01570374477051	0.104586879996316	0.822903519863698	-4.07394984078851
O14832	PHYH	-0.262863380952698	3.30967628901973	-2.05177872402576	0.100061939962733	0.822903519863698	-4.07396722726753
P11802	CDK4	0.157328920503156	3.29891655231788	2.15005892962133	0.0887634630207965	0.822903519863698	-4.0748495296343
Q9NQR4	NIT2	-0.218603896655353	3.32861221370975	-2.10884815755308	0.0933251188794672	0.822903519863698	-4.07519449392089
Q5EBM0-1	CMPK2	-0.24881406736237	3.31532336829688	-2.04068105053263	0.101431314785596	0.822903519863698	-4.07550219018087
P35244	RPA3	-0.778899743114029	3.35903170828155	-2.01313078589409	0.10491782201748	0.822903519863698	-4.07581266902135
Q10713	PMPCA	-0.0929392664669183	3.28330371327027	-2.1550081702883	0.0882319728777449	0.822903519863698	-4.07606510769748
Q9Y3A5	SBDS	0.177834422852877	3.3358129770466	2.19893388723163	0.0836625570407268	0.822903519863698	-4.07634162832153
Q5T6V5	C9orf64	0.164788603614523	3.30146083254214	2.0754454896179	0.0972070865991591	0.822903519863698	-4.07705608672345
P17029	ZKSCAN1	-0.190257722005978	3.26343198386203	-2.01393452440406	0.104814323329116	0.822903519863698	-4.07724893069561
Q969G6	RFK	-0.445564482436162	3.35014319941748	-2.0375717758875	0.101818549096544	0.822903519863698	-4.07740440570346
P06454-1	PTMA	-0.0789458080125269	3.2824783247327	-2.17192568195381	0.0864409800083773	0.822903519863698	-4.07793435590081
P42285	SKIV2L2	0.111719308944915	3.3217818350447	2.42815666535039	0.0636391394057916	0.822903519863698	-4.07926621997397
Q86X76	NIT1	-0.449284661043566	3.333510096049	-2.02997890884719	0.10277080933409	0.822903519863698	-4.08042032933787
Q96IU4	ABHD14B	-0.660266451585874	3.36566864535567	-2.0230192306611	0.103651986287986	0.822903519863698	-4.08148470180081
P60604	UBE2G2	-1.19607728860203	3.31790097633212	-2.1587371651701	0.0878337881767916	0.822903519863698	-4.08172780623033
Q9NWX6	THG1L	0.1435822579085	3.30555308828557	2.01903542658267	0.104159995899368	0.822903519863698	-4.08183801599743
Q9UPT8	ZC3H4	0.200540778800327	3.31027598797489	2.18413050207359	0.0851732761547765	0.822903519863698	-4.08313375409395
Q6UW63	KDELC1	0.115489231855902	3.32203320583735	2.174025244107	0.0862214574784447	0.822903519863698	-4.08386063107134
Q15404-1	RSU1	-0.211213903140221	3.32915873938403	-2.08417655963058	0.0961759719775778	0.822903519863698	-4.08430197804776
O60279	SUSD5	0.224536204838178	3.27654559204799	2.0232016373482	0.103628789185038	0.822903519863698	-4.08478823291427
Q9UJA5-1	TRMT6	-0.197535443337174	3.33189909999816	-2.0835504680292	0.0962495207456255	0.822903519863698	-4.08487211840717
O15217	GSTA4	0.135818106840751	3.3115145683611	2.04161999738621	0.101314685434414	0.822903519863698	-4.0852174051845
Q0VDG4-1	SCRN3	-0.196124727386198	3.29452720963238	-2.00708093797363	0.105700362703213	0.822903519863698	-4.08541758153329
Q16774-2	GUK1	-0.131497774688383	3.30454892980697	-2.02718225574887	0.103123936861307	0.822903519863698	-4.08624828009812
P36969	GPX4	-0.282398370151596	3.31642775851956	-2.0113970432511	0.105141448665238	0.822903519863698	-4.08701402203873
Q99757	TXN2	-0.221837344517881	3.31803585100805	-1.99913709813382	0.1067373103893	0.822903519863698	-4.08718328788075
O43252	PAPSS1	-0.27704110734855	3.31741685472213	-2.18010090548371	0.0855895924041565	0.822903519863698	-4.08726606986061
O75533-1	SF3B1	0.102481221628847	3.3218762071913	2.64038739386495	0.0497243530392779	0.822903519863698	-4.08804586630942
Q6NS38-1	ALKBH2	-0.164839393145851	3.33334274448087	-2.01960765086553	0.104086864079505	0.822903519863698	-4.08862547035939
Q16643	DBN1	0.0732146840172675	3.32043306827799	2.50520558412717	0.0581419718769787	0.822903519863698	-4.08952980931646
Q01581	HMGCS1	-0.192545901285405	3.34209015917512	-2.33332032806452	0.0712054722900941	0.822903519863698	-4.09099141629868
Q9UKX7	NUP50	0.229920804534731	3.30061739603451	2.3569619981551	0.0692310406948743	0.822903519863698	-4.09146363439214
Q8WVC0-1	LEO1	0.162671914691266	3.31319293202619	2.07898831024315	0.0967872708886002	0.822903519863698	-4.09152787417817
P09661	SNRPA1	-0.138745837059404	3.33245845722948	-2.06704878645671	0.0982098703426029	0.822903519863698	-4.0915850384352
Q8N2M8	CLASRP	0.401575634567029	3.29077144486721	1.9958844736947	0.107165000226236	0.822903519863698	-4.09290057211324
Q96EK4	THAP11	-0.21500410174533	3.36014845959727	-2.04620431862074	0.100747302050807	0.822903519863698	-4.09313550283066
Q13011	ECH1	-0.0818754585183314	3.29823095575477	-2.10386373622594	0.0938936930678236	0.822903519863698	-4.0942199911274
P07197	NEFM	0.168924556355909	3.31431948516614	2.24410201975451	0.0792296024966524	0.822903519863698	-4.09587192826476
Q9BYN0	SRXN1	-0.53830842989515	3.31163549510089	-2.32812406025486	0.0716476493221129	0.822903519863698	-4.09975711598945
Q9NPH2	ISYNA1	0.0880617590676209	3.32687826226754	2.10437973229938	0.0938346612384665	0.822903519863698	-4.10087317261259
Q04828	AKR1C1	-0.239855187370381	3.35040085006825	-1.98688620035068	0.108357681275295	0.822903519863698	-4.10144403819415
O75934	BCAS2	-0.104777218828923	3.33410122475197	-2.10091819943268	0.0942314365442756	0.822903519863698	-4.1019418805553
Q13363-1	CTBP1	-0.211850145690042	3.35098127333327	-2.06512767305744	0.0984408513575434	0.822903519863698	-4.1028105922226
Q9Y421-1	FAM32A	-0.1374865049546	3.33231854767144	-1.98117243232856	0.109122308850631	0.822903519863698	-4.10380787042657
Q9Y3B1	SLMO2; PRELID3B	-0.243606473157282	3.35835460946985	-1.9997867112978	0.106652109387988	0.822903519863698	-4.1040847972022
Q9NRP4	ACN9; SDHAF3	-0.269575392282009	3.29678959948266	-2.13167341708098	0.0907682407093645	0.822903519863698	-4.10435425622645
O15014	ZNF609	0.124518206334295	3.31916001209323	2.23738919829519	0.0798719869573521	0.822903519863698	-4.1046650680263
P48556	PSMD8	0.0944918637595879	3.31605052824928	2.10018433753751	0.0943157857180768	0.822903519863698	-4.10527356614786
O75874	IDH1	-0.477328927467108	3.33070338936622	-2.23729721015434	0.0798808289564686	0.822903519863698	-4.10536744884868
Q7L273	KCTD9	-0.174190602194495	3.30815499121355	-1.97591317051339	0.109831162655751	0.822903519863698	-4.10700158980773
Q96AX9-14	MIB2	-0.128412776953387	3.31714918047195	-1.97727939845701	0.109646552496803	0.822903519863698	-4.107240977689
Q9UJX3-1	ANAPC7	0.0953524547342328	3.31841855311753	2.13563721561085	0.0903319399142682	0.822903519863698	-4.10843617070709
O75689	ADAP1	-0.347263060613379	3.31069400291775	-1.98302447816078	0.108873840591398	0.822903519863698	-4.10875435699947
Q9Y365	STARD10	-0.19914281724267	3.32470488318639	-1.97747669119299	0.109619920656742	0.822903519863698	-4.10912822422425
P25912-1	MAX	0.143347809956265	3.29552408610696	1.98458411057015	0.108665066764717	0.822903519863698	-4.1093069196963
P35670	ATP7B	0.156785611086285	3.30502627350693	1.97436373891865	0.11004092600991	0.822903519863698	-4.10972516414511
O94905-1	ERLIN2	0.136143843534709	3.33487489617015	2.05742305346346	0.0993730456300323	0.822903519863698	-4.11008488236198
P02545	LMNA	0.135738408922605	3.30414669460998	2.20225449062559	0.0833276768569525	0.822903519863698	-4.11096339126035
P29084	GTF2E2	-0.0949599011908517	3.31859003092692	-2.02859059035704	0.102945948297806	0.822903519863698	-4.11165082795022
Q16851	UGP2	-0.229823618797061	3.33606983113249	-2.21461996945748	0.0820933324844487	0.822903519863698	-4.11243964583728
P47224	RABIF	-0.395724868376004	3.36190938756886	-2.30218173919377	0.0739005742137119	0.822903519863698	-4.11276616665715
Q9H3L0	MMADHC	-0.251962131521056	3.38691202318458	-2.00129118370748	0.106455064916646	0.822903519863698	-4.1135458542704
Q96GD3	SCMH1	-0.160046642055439	3.30062038256863	-1.96475174080789	0.111351707654565	0.822903519863698	-4.11446024196243
Q9Y6R9	CCDC61	0.366338256745425	3.30919791665434	1.96917731330482	0.110746156841225	0.822903519863698	-4.11472544881165
Q96T58	SPEN	0.0669511464691267	3.30694292772798	2.45659686190808	0.0615458908352835	0.822903519863698	-4.11496238770442
Q9Y2G8	DNAJC16	-0.167635218085747	3.29974477567652	-1.96497670838272	0.111320841096663	0.822903519863698	-4.11515030018021
P13807	GYS1	0.102772689596359	3.31908948521651	2.0374095994268	0.101838789988812	0.822903519863698	-4.1153898021339
Q9Y312	AAR2	0.0953057711010993	3.3113189637042	2.06043550565266	0.099007446915825	0.822903519863698	-4.1156588870571
Q9UQR0	SCML2	0.141478475049561	3.32299982522097	2.26023907568385	0.0777082116501223	0.822903519863698	-4.11624107113709
Q16595-1	FXN	-0.168057807897329	3.30466318345639	-1.96129999390016	0.111826438082401	0.822903519863698	-4.11731569751108
O75879	PET112; GATB	-0.122780917791831	3.29435913832237	-2.00207579085149	0.106352456242381	0.822903519863698	-4.11783229940372
O95067	CCNB2	0.150971320510351	3.31834127264765	2.0435202888514	0.101079081674185	0.822903519863698	-4.11789662901578
Q99961	SH3GL1	0.16341867898076	3.309613987463	2.12391132206692	0.0916292014094993	0.822903519863698	-4.11792608047632
Q6YN16	HSDL2	-0.279304138157569	3.30752048015653	-2.02593401846711	0.103281965657298	0.822903519863698	-4.11894138779458
Q96L92	SNX27	0.19773401505219	3.30046955152463	2.06780298663388	0.0981193490086522	0.822903519863698	-4.11901107340559
P25325-2	MPST	-0.243747178604948	3.3303858470156	-2.00862914269685	0.105499515943481	0.822903519863698	-4.11908903024618
Q7L1V2	MON1B	0.116706876398197	3.30297917394054	2.07282539700804	0.0975188136058281	0.822903519863698	-4.11914284303042
Q9P0N9	TBC1D7; TBC1D7-LOC100130357	0.154499781111237	3.31347122282501	1.96548621384375	0.111250968085366	0.822903519863698	-4.11920883402204
P78330	PSPH	-0.409765320665054	3.33641176167556	-2.01589071223499	0.104562874921672	0.822903519863698	-4.11924315827051
Q96CB9	NSUN4	-0.14895620796215	3.29062034040693	-1.95865789509409	0.112191258990107	0.822903519863698	-4.11940944544399
P58546	LUZP6; MTPN	-0.238815873831605	3.36820566326586	-2.01470247658435	0.104715534230509	0.822903519863698	-4.11956533789872
Q9NVM6	DNAJC17	0.199397128769179	3.29711556761399	1.96157748350386	0.111788195090543	0.822903519863698	-4.11986794242215
Q63HK5	TSHZ3	0.109908630347009	3.3395979636472	2.06940162615916	0.0979277701840222	0.822903519863698	-4.11994611196564
O95405-1	ZFYVE9	0.142812907027327	3.28460165009438	2.0771788755326	0.0970014417451494	0.822903519863698	-4.12066539613151
Q7Z4H3-1	HDDC2	-0.287076354110036	3.32623714897808	-1.95425780977752	0.11280161411521	0.822903519863698	-4.12275162410527
Q6KF10	GDF6	-0.293935154869449	3.47895280152829	-2.28062146933323	0.0758318223049773	0.822903519863698	-4.12550347554036
P62873	GNB1	-0.354155949741212	3.34437167370539	-2.15558383602452	0.0881703761144576	0.822903519863698	-4.12573543924037
Q9NUJ1	ABHD10	-0.180501523686588	3.31259494438436	-2.01535479080508	0.104631698462001	0.822903519863698	-4.12675397715125
Q7L4P6	BEND5	0.107624217415577	3.33954078784554	2.03144233485571	0.102586538661275	0.822903519863698	-4.1273046788047
P82970	HMGN5	0.36555128652867	3.27809369979932	1.98028423369191	0.109241681417671	0.822903519863698	-4.12794026027624
Q99755-3	PIP5K1A	0.201327367070396	3.29295749091427	2.02280025462042	0.103679841298566	0.822903519863698	-4.12835348956843
P49914	MTHFS	-0.27048167131812	3.33124110264156	-1.9860004206458	0.108475845467706	0.822903519863698	-4.1287405749162
O95104	SCAF4	0.10277266355607	3.3225671923426	2.10593687327202	0.0936567597997379	0.822903519863698	-4.12954838426913
Q4VC05-2	BCL7A	0.154758722446544	3.32206385731062	2.08198454550666	0.0964337377920667	0.822903519863698	-4.12994303346539
Q8WUQ7-2	CACTIN	0.130707618120464	3.32688560345131	1.99552538007795	0.107212328959679	0.822903519863698	-4.13048243938189
Q8N5M4	TTC9C	-0.376196864061903	3.35012215030074	-1.97714413734333	0.10966481486578	0.822903519863698	-4.13092551943923
Q9BVK6	TMED9	0.252369833428531	3.30753961939193	2.02366938633341	0.103569329633823	0.822903519863698	-4.13194576088885
A2RRP1-1	NBAS	0.0911393059376139	3.31840206631825	2.27384922146023	0.0764497412959208	0.822903519863698	-4.13240085037227
Q5JPH6-2	EARS2	-0.11356528387081	3.31218727778803	-1.96724458622639	0.111010182593526	0.822903519863698	-4.1336728829067
Q96I51	WBSCR16; RCC1L	-0.142103444260802	3.28576638902997	-1.95783502872755	0.112305136824958	0.822903519863698	-4.13512739924018
Q9NZW5	MPP6	-0.303310552892345	3.34724125776954	-2.10262201794341	0.0940359134420994	0.822903519863698	-4.1352952521331
Q9Y248	GINS2	-0.45496224757906	3.32850612252354	-1.94984675517823	0.1134170090569	0.822903519863698	-4.13531385069309
P49005	POLD2	-0.45208223495545	3.3413240344114	-1.97711528240427	0.109668711151007	0.822903519863698	-4.136633240157
P61088	UBE2N	-0.515708107563568	3.38699041495786	-1.95327382778398	0.112938585448358	0.822903519863698	-4.13705595182843
Q9BRX5	GINS3	-0.799743673263867	3.3441019062697	-1.99665396142148	0.107063655907572	0.822903519863698	-4.13758814614692
P78406	RAE1	-0.198666017577358	3.33078795746998	-2.26907562787145	0.0768885909549088	0.822903519863698	-4.13792422453575
O96019-1	ACTL6A	-0.277915141017945	3.32513996000526	-2.18606480726886	0.0849742117511765	0.822903519863698	-4.13833643893195
Q9UBI1	COMMD3	-0.483784899225181	3.35727538195095	-1.94313605034252	0.114360032664624	0.822903519863698	-4.13835355111696
Q9HCK0	ZBTB26	-0.535488757001875	3.33833399209138	-2.51739321253236	0.0573215317424466	0.822903519863698	-4.13847706655368
Q96J01	THOC3	-0.114199938780863	3.33388582311248	-2.07543017605136	0.0972089054410776	0.822903519863698	-4.14034676169284
Q93050-3	ATP6V0A1	0.0999021650415362	3.31846192039978	2.08735444275232	0.0958035833693641	0.822903519863698	-4.14131712781776
O14730	RIOK3	0.156244544382387	3.34708550773617	1.94307550249036	0.114368578695698	0.822903519863698	-4.14167911050543
P29374-1	ARID4A	0.0890795191471799	3.33193507942793	2.15958220146818	0.0877438240658675	0.822903519863698	-4.14178825299999
Q8N568-3	DCLK2	0.106326596339983	3.30942591932336	2.03457188736592	0.102193653028087	0.822903519863698	-4.14254674891945
Q8NBJ7-1	SUMF2	-0.248273806005262	3.34127582590954	-1.93957649095106	0.114863591881217	0.822903519863698	-4.14280920167182
Q6PI98-1	INO80C	-0.203990182630586	3.33478387174833	-1.96510248983283	0.111303587259247	0.822903519863698	-4.1442376642722
Q9UK39	CCRN4L; NOCT	-0.184395704725107	3.3200432224128	-1.95353110719626	0.112902754946074	0.822903519863698	-4.14430983645875
P46782	RPS5	0.117911527300098	3.31199001770662	2.15971207166211	0.0877300066558087	0.822903519863698	-4.14460030687122
P49792	RANBP2	0.111133705216121	3.32704705770653	2.75601414872771	0.0435947488966601	0.822903519863698	-4.14509865917615
Q96H20-1	SNF8	-0.117720591452385	3.31922903454954	-2.0132413631758	0.104903576366123	0.822903519863698	-4.14773651719405
O95249-1	GOSR1	0.154975677568572	3.31721250745004	1.95088208128745	0.113272251269436	0.822903519863698	-4.14817243540167
Q9BY32-1	ITPA	-0.569305782059535	3.34008764015752	-1.93426046214174	0.115619986390511	0.822903519863698	-4.14957570498447
P52747	ZNF143	0.168223240716886	3.25819791110767	1.92549564956474	0.116878563998506	0.822903519863698	-4.15005794586871
Q5HYI8	RABL3	-0.612744086813926	3.3292167796173	-1.92022168730606	0.117642812210195	0.822903519863698	-4.15008543053236
Q86YP4-3	GATAD2A	0.143440922824992	3.32482841841851	2.12194039987998	0.0918492076033608	0.822903519863698	-4.15083764126491
Q86W42	THOC6	-0.524595935326741	3.35324977524379	-1.92161417131052	0.117440518735433	0.822903519863698	-4.15125861623501
Q14088	RAB33A	0.167138339166471	3.32984449936599	1.93703303670516	0.11522483657677	0.822903519863698	-4.15154907266754
O60232	SSSCA1	0.127823663969045	3.29464589126645	1.92209177922473	0.117371218362924	0.822903519863698	-4.15226677169716
Q96AB6	NTAN1	-0.37606034640684	3.31919718611371	-1.98377764424903	0.108772968110234	0.822903519863698	-4.15268732181118
Q7L8W6	ATPBD4; DPH6	-0.721736584796411	3.32977698552331	-1.91883717452832	0.117844310779702	0.822903519863698	-4.15365264806591
O75386-2	TULP3	-0.256350169472169	3.35312675390031	-1.91474496484686	0.118442003555273	0.822903519863698	-4.15369037800332
P63098	PPP3R1	-0.336064913790421	3.33550536386184	-1.92514917284186	0.116928611269677	0.822903519863698	-4.15398865578169
Q16763	UBE2S	-0.0868696633405978	3.32719855053949	-2.01119312280285	0.105167784583476	0.822903519863698	-4.15440697430134
Q9NR45	NANS	-0.22333542418484	3.33131375303702	-2.11191956355442	0.0929766028799521	0.822903519863698	-4.15481347069492
P06865	HEXA	0.365958329274516	3.30448071838693	1.97659514420259	0.109738970584428	0.822903519863698	-4.15538973342272
O95251-1	KAT7	0.15396022628026	3.31575557757595	2.05581484765738	0.0995688112282953	0.822903519863698	-4.15591481803049
Q9NRF9	POLE3	0.141711758737991	3.31478095136677	1.910815436533	0.119018932820467	0.822903519863698	-4.15711232349438
Q8WUH1	CHURC1	-0.443338730505517	3.33530827317568	-2.20427715438119	0.0831244039313711	0.822903519863698	-4.15725154074924
O75792	RNASEH2A	-0.311826192768309	3.32038689884374	-2.00238279429091	0.106312335778845	0.822903519863698	-4.15789360151021
P05452	CLEC3B	0.620113591091998	3.46573243135261	3.14002374632673	0.0285953105011802	0.822903519863698	-4.15797474815937
O95825-1	CRYZL1	-0.210764688864174	3.34368864491043	-1.97410978994547	0.110075346235009	0.822903519863698	-4.16091181926998
P10644	PRKAR1A	-0.110008247143487	3.33341008908246	-2.01355536652041	0.104863134572614	0.822903519863698	-4.16113347148931
Q96HA7	TONSL	-0.118839814687505	3.29546456794801	-1.97195297327653	0.110368140448342	0.822903519863698	-4.16156206920697
Q9H0W9	C11orf54	-0.718777421103499	3.34557548712971	-1.93735503701315	0.115179037060059	0.822903519863698	-4.16186873726802
Q5VTE6-1	ANGEL2	-0.195509528981708	3.32859635534564	-1.9052715991944	0.119837894843941	0.822903519863698	-4.16258506491634
Q14847	LASP1	0.114012561755728	3.3069620364179	2.11148406924319	0.0930259338373016	0.822903519863698	-4.1638229399976
Q8WUB8	PHF10	0.219713994457405	3.29226404361532	1.99178923359244	0.107706071800411	0.822903519863698	-4.16524902952499
P51570-2	GALK1	-0.279083361027345	3.3366886192999	-1.91048624543255	0.119067398073478	0.822903519863698	-4.16544906393957
P46976-1	GYG1	0.179815106071415	3.29533755512002	1.92440324462397	0.117036434322096	0.822903519863698	-4.16698604938194
Q9BU02-1	THTPA	-0.236649752775027	3.3100405796895	-1.90439394493135	0.119968087281058	0.822903519863698	-4.16706643432362
Q8NI27-1	THOC2	0.154665460399087	3.31277064220843	2.35490071411471	0.0694007800611018	0.822903519863698	-4.16773637919613
Q9BTE1	DCTN5	-0.140469937412898	3.33677134133932	-1.91618574155083	0.118231206704302	0.822903519863698	-4.16810067006053
Q5VSG8-1	MANEAL	0.191532188101127	3.27695796358834	1.89685326801851	0.121092812335685	0.822903519863698	-4.16812784770461
Q9NW82	WDR70	0.19407608375132	3.29718619504849	2.07431840971659	0.0973410508000276	0.822903519863698	-4.1684691641468
Q9BWJ5	SF3B5	-1.01684367845501	3.30529315366197	-1.91702767738985	0.118108207402751	0.822903519863698	-4.16857857279227
P0C7P0	CISD3	-0.261585309591641	3.31304175281316	-1.94662005284174	0.113869414774611	0.822903519863698	-4.16943324634869
Q96FK6	WDR89	-0.140746286363716	3.31846235642172	-1.9209706387097	0.11753396262144	0.822903519863698	-4.1696118296776
P48728	AMT	-0.144910846801739	3.30243802577429	-1.89238250883152	0.121764859446869	0.822903519863698	-4.17145807143532
Q15759	MAPK11	-0.203664514435599	3.34851984573747	-1.9434760461544	0.114312056429165	0.822903519863698	-4.17146272895374
Q9UKY1	ZHX1	0.141230732254912	3.31396686561291	1.99342932945392	0.107489032120467	0.822903519863698	-4.17250321128849
Q10570	CPSF1	0.0919115693075772	3.31640023009881	2.27497012474619	0.0763470893709327	0.822903519863698	-4.17303536091386
Q05707-1	COL14A1	0.113726163024995	3.30906847278392	1.97738359419473	0.109632486634297	0.822903519863698	-4.17443121903703
Q9UHG3	PCYOX1	0.149361403021411	3.31143818183851	2.07146184305646	0.0976814658594743	0.822903519863698	-4.17474648329799
P48200	IREB2	-0.227297912225051	3.35981486819207	-1.99315643006105	0.107525113687419	0.822903519863698	-4.17495539588863
P16152	CBR1; SETD4	-0.200280941543383	3.32165334302743	-1.97406294986308	0.11008169618014	0.822903519863698	-4.17501058542913
O00458	IFRD1	0.120653755068944	3.30734949015319	1.97689698331063	0.109698192844806	0.822903519863698	-4.17501457792861
Q9Y5L4	TIMM13	-0.162818358065407	3.3240062380127	-1.91023716214851	0.119104083198721	0.822903519863698	-4.17516423262246
O15305	PMM2	-0.425225745349352	3.36096636454384	-2.02263514442092	0.103700849528529	0.822903519863698	-4.17517522267109
Q13428-4	TCOF1	0.138440356023698	3.31918047549113	2.38798278072808	0.0667308159194568	0.822903519863698	-4.17518780760077
Q8NB37	PDDC1; GATD1	-0.358845768244217	3.32028629236847	-1.95852098116659	0.112210198276586	0.822903519863698	-4.17536891850998
Q5BKY9-1	FAM133B	0.51710035638694	3.24372551796995	1.98825473474262	0.108175384940415	0.822903519863698	-4.17598448689565
Q9BW30	TPPP3	0.232330667008761	3.31384002318378	2.00254769619229	0.106290792354534	0.822903519863698	-4.1760556633562
Q2M1P5	KIF7	0.118075419509449	3.3108828608433	1.91878286858165	0.117852221721179	0.822903519863698	-4.17695054450167
Q86V88	MDP1	-0.278422815297211	3.3565912602133	-1.93305880604446	0.115791690436273	0.822903519863698	-4.17806110718046
P51809	VAMP7	0.159856852893776	3.31170403189278	1.92240234632501	0.117326178491285	0.822903519863698	-4.17843917406132
Q13868	EXOSC2	-0.14429788178016	3.34751097056445	-2.00532929999729	0.105928090144067	0.822903519863698	-4.17851526982569
P54886	ALDH18A1	-0.0802223860858653	3.29265360806067	-2.33013028305304	0.0714765746454553	0.822903519863698	-4.17887038916425
Q9BV79	MECR	-0.143040343862367	3.25795266913719	-1.9172719470337	0.118072546955122	0.822903519863698	-4.17992687966688
Q9UHR6	ZNHIT2	-0.188020095268041	3.30821672168805	-1.89254900690232	0.121739761441842	0.822903519863698	-4.180014917966
Q53FT3	C11orf73; HIKESHI	0.292087427527448	3.32798677177755	1.88050307493715	0.123569626484499	0.822903519863698	-4.18006433735949
Q13042	CDC16	0.0889604624186756	3.31987657537049	2.06081988492198	0.0989609010860231	0.822903519863698	-4.18037141357464
Q96S82	UBL7	-0.392992018567869	3.35542631715211	-1.88115498234636	0.123469864071578	0.822903519863698	-4.18041908617887
O14773	TPP1	-0.228314124075263	3.34782169480595	-1.87792239394698	0.123965380217888	0.822903519863698	-4.18212776788304
P84095	RHOG	-0.16884990497039	3.32774976096508	-1.90438271607978	0.119969753945265	0.822903519863698	-4.18248165524024
Q9BVQ7-1	SPATA5L1	-0.230996181938572	3.31967437535045	-1.98417877096409	0.108719285095618	0.822903519863698	-4.18256646286936
Q12888-2	TP53BP1	0.137216983160231	3.32437087275894	2.54181508006816	0.0557158530508206	0.822903519863698	-4.18286977399912
Q16222-1	UAP1	0.108555211699977	3.33470921689608	2.06104324853304	0.0989338639386323	0.822903519863698	-4.18287751691998
Q8IV50	LYSMD2	-0.345677431661788	3.46568977854685	-2.1407140240596	0.0897764206003827	0.822903519863698	-4.18378997752465
Q5BKX5-1	C19orf54	-0.410312326627745	3.31532307889912	-1.93647969191929	0.115303586037185	0.822903519863698	-4.18409991045661
Q9Y530	OARD1	-0.13280182226805	3.32776311714653	-1.90207437803524	0.120312889709159	0.822903519863698	-4.18577467959651
Q96MX6	WDR92	-0.24869851293976	3.32283624633738	-1.91924250859471	0.117785281939938	0.822903519863698	-4.18675336348225
Q9HD26-1	GOPC	0.129985325891978	3.3166887047857	2.07719773252404	0.0969992071555676	0.822903519863698	-4.18924822615071
O00461	GOLIM4	0.137118818986964	3.3132111482177	2.04192663517923	0.10127662801098	0.822903519863698	-4.19072238483204
Q9BYG4-1	PARD6G	-0.505633362220145	3.29372818410535	-2.09764961095586	0.0946077471026996	0.822903519863698	-4.19096809617299
P21333	FLNA	0.0306294672121927	3.32122268250169	2.85340765732231	0.0390854502759667	0.822903519863698	-4.19104295577463
Q8WUP2	FBLIM1	0.122688863971677	3.31257241083175	1.87148392093209	0.124958522713561	0.822903519863698	-4.19119272143403
O60287	URB1	0.110939425245468	3.31676384222345	2.23621116263624	0.0799853013724419	0.822903519863698	-4.19193542699558
P54284	CACNB3	0.124686675806592	3.31102188937095	1.91364511299396	0.11860318611297	0.822903519863698	-4.19249906437841
Q99436	PSMB7	0.140212019296613	3.32115042715734	2.02656210788187	0.103202416375912	0.822903519863698	-4.19293826762659
O43143	DHX15	0.111837072532644	3.31380585401344	2.41665807599585	0.0645076252933755	0.822903519863698	-4.19326853807942
P22304	IDS	-0.2579463335034	3.31959756111105	-1.94836465236766	0.113624574184255	0.822903519863698	-4.19358889278124
Q9Y5Q8-3	GTF3C5	0.0808574081628715	3.31051243646278	2.14330005199855	0.0894948639847492	0.822903519863698	-4.19439198280955
P17677-2	GAP43	0.298327093616658	3.30109190495176	2.10538107084324	0.0937202179937644	0.822903519863698	-4.19489614868106
P49773	HINT1	-0.678242216371073	3.37010952097486	-1.99530660278601	0.107241174789019	0.822903519863698	-4.19534812336069
Q9BW62	KATNAL1	-0.191399929298859	3.33525496115707	-1.97223191854036	0.110330226480361	0.822903519863698	-4.19536992541722
P49641	MAN2A2	0.41586794049594	3.29275656445141	2.078657890009	0.0968263427745127	0.822903519863698	-4.19654619536781
P17858-1	PFKL	0.11829144796318	3.32440956558153	1.95238892378123	0.113061914899885	0.822903519863698	-4.19704888871628
O95696-2	BRD1; LOC90834	-0.118809321926454	3.32365611303019	-2.12409888051128	0.0916082945289713	0.822903519863698	-4.19736966499357
Q96E14	RMI2	-0.197448769743107	3.31159625399286	-1.92191194994886	0.117397306342024	0.822903519863698	-4.19765583582116
P17036-1	ZNF3	0.211711523892149	3.3209727757095	1.85950836164344	0.126827932339803	0.822903519863698	-4.19869127366205
Q08378	GOLGA3	0.109672080336263	3.30801092536596	2.25053842523201	0.0786189362222174	0.822903519863698	-4.19920365858431
Q86V97	KBTBD6	0.153150221602252	3.3140653399622	2.04885287499825	0.100421045203997	0.822903519863698	-4.19935067336396
Q15436	SEC23A	0.152943631623063	3.30999764824675	2.02954118128617	0.10282599523051	0.822903519863698	-4.20022746009083
Q92995	USP13	-0.168274169978455	3.32565043150785	-2.02053066691017	0.103969015128522	0.822903519863698	-4.20073362515386
Q9BXY0	MAK16	0.173108409021259	3.31997124819658	1.95610116885334	0.11254548818866	0.822903519863698	-4.2017209730601
Q8N680	ZBTB2	-0.225190588225761	3.31530945321973	-1.84971125731138	0.128378967847597	0.822903519863698	-4.20340948411158
Q96KR1	ZFR	0.0841478386358659	3.31071763263416	2.22175728854365	0.0813898984899374	0.822903519863698	-4.20511352522597
P56937-1	HSD17B7	0.154230454238537	3.3027154537886	1.87671423709909	0.124151109220959	0.822903519863698	-4.20511654120798
O43915	FIGF; VEGFD	0.117686811445271	3.35211959145488	1.90745491353769	0.119514661618757	0.822903519863698	-4.20587027637881
Q8NCH0	CHST14	0.179580872897497	3.28739378560981	1.85344224433245	0.127785976069243	0.822903519863698	-4.20819277061788
Q8WW38-1	ZFPM2	0.124574412887352	3.26108530869292	1.88367436303157	0.123085110510131	0.822903519863698	-4.20870732536128
Q13442	PDAP1	0.150902529239986	3.28661794205808	2.05465714915859	0.0997099916845967	0.822903519863698	-4.20879951493522
Q9P0U4-2	CXXC1	-0.0918711480809248	3.31840129724613	-1.95496868830141	0.112702768148396	0.822903519863698	-4.20902996053913
P13489	RNH1	-0.173103386101022	3.33096058802859	-2.0452133145627	0.100869667161696	0.822903519863698	-4.20947913692922
Q9UI30	TRMT112	-0.869483032884656	3.37359499804207	-1.97717491143051	0.109660659599194	0.822903519863698	-4.2095114460055
P33897	ABCD1	0.145939214148122	3.30512998641145	1.85290628632518	0.127870983766893	0.822903519863698	-4.20992411804976
Q9NWY4	C4orf27; HPF1	-0.252189233185461	3.3268506982964	-1.96182968252494	0.111753449571737	0.822903519863698	-4.21005530613234
Q99581	FEV	-0.319961547155436	3.37855753282824	-1.99471425708568	0.107319316993525	0.822903519863698	-4.21006695555098
Q9Y5Y2	NUBP2	-0.565574254313288	3.32138144551747	-1.96785436853196	0.110926809758119	0.822903519863698	-4.21007127329381
O75607	NPM3	-0.336125460864377	3.33766052177014	-1.85670914440052	0.127269088875536	0.822903519863698	-4.21022527892605
Q9Y314	NOSIP	0.159060737981946	3.2994256433878	1.90944764010377	0.119220442872256	0.822903519863698	-4.21080216476708
P55809	OXCT1	-0.116720604146918	3.29401379975133	-2.04330706882464	0.1011054882192	0.822903519863698	-4.21238082234462
Q9BTL3	FAM103A1	-0.166848963423748	3.30454125240558	-1.85242782566309	0.127946921661568	0.822903519863698	-4.21370538240413
Q9H3F6-1	KCTD10	0.141277108314018	3.31133450851445	1.87598844399055	0.124262824664946	0.822903519863698	-4.21404469388443
P20073-1	ANXA7	0.150129183619266	3.32770624029783	1.94117029033136	0.114637834061844	0.822903519863698	-4.21420050881476
P05423	POLR3D	0.097545468352605	3.33463159252642	1.92621796895394	0.116774300080025	0.822903519863698	-4.21497175243257
P20645	M6PR	0.254536842412089	3.30242268985617	1.89700692786058	0.121069783299501	0.822903519863698	-4.21555484971017
Q9NVS9	PNPO	-0.455445376790224	3.36633906346405	-1.84374803177856	0.129332703209623	0.822903519863698	-4.21600122473297
Q9BZD4	NUF2	0.0788505944636792	3.32773745833821	2.02242155566836	0.103728032770166	0.822903519863698	-4.21622571229979
Q9NYU2-1	UGGT1	0.140179246918398	3.32637673692975	2.34096403240094	0.0705604467521911	0.822903519863698	-4.21663383924613
Q9P1U1-1	ACTR3B	0.175009572528564	3.31438371497525	1.84576550850936	0.129009212708054	0.822903519863698	-4.21933683973745
Q8IVM0-2	CCDC50	0.127325671711054	3.32111741451974	1.87603829061686	0.124255148818883	0.822903519863698	-4.21954349736219
Q9Y3B2	EXOSC1	-0.160591908696507	3.32418098995537	-1.88025216323563	0.123608046359906	0.822903519863698	-4.21960731023608
P58557	YBEY	-0.232097428369084	3.28891038153816	-1.96208205865763	0.111718691070365	0.822903519863698	-4.22016620550495
P24752	ACAT1	-0.117323067495759	3.29363759725698	-2.11051117051656	0.0931362411896881	0.822903519863698	-4.2222608621116
A6NJ78	METTL15	-0.157785281410438	3.29970868434095	-1.82495324052467	0.132387185342528	0.822903519863698	-4.22244871711815
Q9NX46	ADPRHL2	-0.111309025086563	3.31466939736019	-1.8795061577444	0.123722349341877	0.822903519863698	-4.22309388607028
Q6UWE0	LRSAM1	-0.102807429834412	3.32558121065871	-1.98497459965096	0.108612861921394	0.822903519863698	-4.22383323892238
Q9H115	NAPB	-0.129631962367065	3.3353104632919	-1.87388847312919	0.12458664829555	0.822903519863698	-4.22401918459713
P47813	EIF1AX; LOC101060318; LOC107984923	-0.317731228506372	3.34667612160419	-1.9382374698485	0.115053623004848	0.822903519863698	-4.22403802813649
Q96GD4-5	AURKB	0.110344789567066	3.34249176948983	1.98751471893244	0.108273918756461	0.822903519863698	-4.22414075652962
O43772	SLC25A20	-0.155898683501777	3.2905741346743	-1.8369623222087	0.130426959665539	0.822903519863698	-4.22444984011363
Q01415-1	GALK2	-0.130801656279162	3.34809207796885	-1.84452265155683	0.12920839774798	0.822903519863698	-4.22486900325651
Q9Y5A7	NUB1	0.148434971058077	3.29909532799894	1.87083245855729	0.125059473705182	0.822903519863698	-4.2254936673505
Q14232	EIF2B1	0.210011106946113	3.30625151428907	2.00935726281787	0.105405197916438	0.822903519863698	-4.22609538064629
Q03154-1	ACY1	-0.436059135532954	3.35035364242606	-1.86084883326488	0.126617239070724	0.822903519863698	-4.22667005746788
Q9UJ14-1	GGT7	-0.15998453398326	3.29885861146319	-1.81986381874274	0.133227132039537	0.822903519863698	-4.22692807955317
Q9H469	FBXL15	-0.481937570061424	3.36499406749637	-2.15838423623182	0.0878713910689684	0.822903519863698	-4.22804061833162
P09382	LGALS1	-0.455660031772043	3.34191374289177	-1.98752420869875	0.108272654583339	0.822903519863698	-4.22826541777749
Q86V15-1	CASZ1	-0.320566047580115	3.29645170882996	-2.07012209509118	0.0978415608499082	0.822903519863698	-4.22882973458715
Q8NBU5	ATAD1	-0.140350046083991	3.30065923459757	-1.94397555932069	0.114241609441086	0.822903519863698	-4.22908291530624
P14649	MYL6B	0.208213011292574	3.30969112305822	1.9141419151829	0.118530351574611	0.822903519863698	-4.22997416628693
Q96I59	NARS2	-0.0945238667569599	3.30280572240002	-1.91315022481967	0.118675786774155	0.822903519863698	-4.23065873472529
Q8WUR7	C15orf40	-0.211060959300364	3.32323550426825	-1.812625312629	0.134431292881751	0.822903519863698	-4.23103172685798
Q9NWH9-1	SLTM	0.18845806082654	3.31310224598719	2.17206214809028	0.0864266932938488	0.822903519863698	-4.23110637532282
Q53EP0	FNDC3B	-0.116288063032292	3.29895368867757	-1.85828407332483	0.127020683605313	0.822903519863698	-4.23176889811912
P11766	ADH5	-0.232536445984093	3.33989994723032	-2.12209901542253	0.0918314810019023	0.822903519863698	-4.23236248486381
P08397-1	HMBS	-0.192209719740256	3.30737576583164	-1.82090256353686	0.133055251876825	0.822903519863698	-4.23236881024972
Q8WXW3	PIBF1	0.116468765938732	3.32442913691939	2.11692720869047	0.0924113713023933	0.822903519863698	-4.23245974597056
Q9BSI4-2	TINF2	0.146568411168582	3.32724105596501	1.81326091777312	0.134325106367271	0.822903519863698	-4.23349205275959
Q9Y262	EIF3L	0.153441049878075	3.30514725882459	2.29729579119036	0.0743334822503871	0.822903519863698	-4.23417227444281
Q16186	ADRM1	-0.296208495132355	3.30768768113718	-1.84237577669577	0.129553218574257	0.822903519863698	-4.2346010160827
Q9UK76	HN1; JPT1	0.12015782023989	3.3239290126906	1.98244094358499	0.108952062203731	0.822903519863698	-4.23487891620541
Q9H1J1-1	UPF3A	-0.229189741476875	3.31189478549723	-1.80853653529771	0.135116461832138	0.822903519863698	-4.23503311133436
Q9NWU2	GID8	-0.201013251415314	3.31207340037304	-1.81141734152941	0.134633340795156	0.822903519863698	-4.23511478441262
Q9UL42	PNMA2	-0.142937735776198	3.34500357525111	-1.82406290293624	0.132533727035144	0.822903519863698	-4.23526957154625
O60930	RNASEH1	-0.175042154137396	3.30374011844759	-1.81153692032121	0.134613325755321	0.822903519863698	-4.23549815193402
Q9H972	C14orf93	-0.187233928282402	3.34082098870085	-1.84242478289637	0.129545336759572	0.822903519863698	-4.23607868167963
Q6ZNW5	GDPGP1	-0.269051550728577	3.35626351557755	-2.0220964719806	0.103769420411714	0.822903519863698	-4.23618509665322
Q9UQF2	MAPK8IP1	-0.285023620412715	3.33169524741896	-1.84874121640293	0.128533612282952	0.822903519863698	-4.23621328899989
Q17R98	ZNF827	-0.437997981538168	3.70203427356123	-2.57025584980183	0.0539085497558536	0.822903519863698	-4.23683951100594
Q99496	RNF2	0.134500535842804	3.31128918310692	1.96700954256015	0.111042336754883	0.822903519863698	-4.23687902796528
Q8NCF5-1	NFATC2IP	-0.167604368328791	3.324687980428	-1.80773086063367	0.135251897340988	0.822903519863698	-4.2372326463059
Q07864	POLE	0.104014138347316	3.30563973879027	2.27405400621538	0.0764309759665991	0.822903519863698	-4.23728386362435
Q9Y3D2	MSRB2	-0.388239407910145	3.27863555291511	-1.80405393552934	0.135871782970324	0.822903519863698	-4.23731897672724
O00442	RTCA	-0.174225617902966	3.32239721404135	-1.91738232326126	0.118056437056225	0.822903519863698	-4.23735139801656
O00303	EIF3F	-0.264382240160016	3.34023369797354	-2.16175154904028	0.0875133258904669	0.822903519863698	-4.23750134225793
Q9BRR3	TMEM246	0.253460898461459	3.29197254506365	1.84025455904236	0.129894859075543	0.822903519863698	-4.23762286393121
Q01538-2	MYT1	0.132053139078674	3.33152136600121	2.12731392094443	0.0912507142819315	0.822903519863698	-4.23945203288844
P25787	PSMA2	-0.38277301287692	3.34277702262526	-1.98533340826171	0.108564915883706	0.822903519863698	-4.23964220207867
Q15599	SLC9A3R2	0.118505503004489	3.31457778532013	1.84310277418941	0.129436344573915	0.822903519863698	-4.23985816848995
O43633	CHMP2A	-0.242299908410379	3.32787806276694	-1.83730381368378	0.130371661627958	0.822903519863698	-4.24064305236393
Q9BUK6	MSTO1	-0.423922331931561	3.34578404801181	-1.82942822121045	0.131653186871652	0.822903519863698	-4.24082096854738
P29762	CRABP1	-0.110961626746748	3.35797962386965	-1.82206666411806	0.132862902592884	0.822903519863698	-4.24089977701055
Q9NP73-1	ALG13	-0.332068122994551	3.31502907775042	-1.79986130210593	0.13658220090176	0.822903519863698	-4.24130388752509
Q53HV7-1	SMUG1	-0.33816097752586	3.37638675543198	-1.93542977775903	0.115453160771742	0.822903519863698	-4.24172597187164
Q8NBF2-1	NHLRC2	0.104420451490749	3.31400000272021	2.09544350231517	0.0948626451765829	0.822903519863698	-4.2417345318863
Q96NL8	C8orf37	-0.362421131491298	3.31107446042875	-1.96892573356887	0.110780487007191	0.822903519863698	-4.2418718132106
Q9H5V9-1	CXorf56	0.239655124419579	3.30709599026056	1.85279820735761	0.127888133189509	0.822903519863698	-4.24198629202444
Q9NYS0	NKIRAS1	-0.212286205385169	3.33759367691136	-1.80035174487874	0.136498900014126	0.822903519863698	-4.24219842754296
Q8ND90	PNMA1	-0.171059304643486	3.34717256108201	-1.85726103168347	0.127181984992209	0.822903519863698	-4.24223621947572
Q68DK7	MSL1	0.135740064581352	3.32586835161239	1.80277329821777	0.136088373123993	0.822903519863698	-4.24279039357931
P55197	MLLT10	0.1610931183522	3.26598515257237	1.79655544360346	0.13714506909051	0.822903519863698	-4.24360387148786
Q9NT99	LRRC4B	-0.141367532496523	3.33258275473795	-1.81185836925033	0.134559537074422	0.822903519863698	-4.24379091677581
O95985	TOP3B	-0.121216107748423	3.32079285876375	-2.01078319472084	0.105220747175923	0.822903519863698	-4.2441201349948
Q12788	TBL3	0.0985693153818657	3.31422434374216	2.00163872401879	0.106409601638456	0.822903519863698	-4.2443370403824
Q9UHR5-1	SAP30BP	0.244714235964553	3.29959134196183	1.9091194674445	0.119268844023803	0.822903519863698	-4.24512284310917
Q9UHA4	LAMTOR3	-0.4089079827271	3.39624730688941	-1.99785295868378	0.106905946124994	0.822903519863698	-4.24551648891967
P62487	POLR2G	-0.258610249657578	3.37162348221783	-1.79977285066363	0.136597229829086	0.822903519863698	-4.24694870575051
Q15004-1	KIAA0101; PCLAF	0.160477478666161	3.32382875693198	1.82810521670312	0.131869748564597	0.822903519863698	-4.24830181685536
Q7Z417	NUFIP2	0.15309819616225	3.30233081081326	2.07880933407074	0.0968084325609472	0.822903519863698	-4.24930729050909
Q9UK22	FBXO2	-0.285717670404943	3.32345980536862	-1.82857285346384	0.131793159177337	0.822903519863698	-4.24933987445375
Q9H0U6	MRPL18	-0.17879044708314	3.29702101644351	-1.80473209420795	0.135757232672749	0.822903519863698	-4.24996991301094
Q9NUP1	BLOC1S4	-0.200830056017334	3.33319466366851	-1.79764745195726	0.136958874656896	0.822903519863698	-4.25113570143491
P42785-1	PRCP	0.178149454557551	3.32475118003592	1.83655554592022	0.130492861166425	0.822903519863698	-4.25183341182752
Q8N3U4-2	STAG2	0.118180884460254	3.31705453571012	2.31972282205383	0.0723689181146298	0.822903519863698	-4.2521877099141
Q96N11	C7orf26	0.13662353305175	3.31653387351947	1.80273959378908	0.136094078271919	0.822903519863698	-4.25231424654133
Q68E01-2	INTS3	0.0928702770688069	3.33237774710678	2.10062941806269	0.0942646190622979	0.822903519863698	-4.25274170385904
P61421	ATP6V0D1	0.186849851824213	3.31140933342833	1.84368647485516	0.129342586763354	0.822903519863698	-4.25299806238386
Q5THJ4	VPS13D	0.127990025609072	3.31431455019979	1.82916618021676	0.13169605082287	0.822903519863698	-4.25313826921036
Q9UK58	CCNL1	0.158282215795701	3.30954024148264	1.79215922774847	0.137897303822582	0.822903519863698	-4.25327068791035
O00584	RNASET2	-0.204109056345978	3.36847369494341	-1.7950716357892	0.137398487419378	0.822903519863698	-4.25401205735811
Q9NRD5	PICK1	0.208959901458488	3.29828511397221	1.94471749879034	0.114137057205344	0.822903519863698	-4.25445083691221
Q8IZ69	TRMT2A	-0.106453613192547	3.32374290220329	-1.92781513692828	0.116544102420771	0.822903519863698	-4.25462620514161
P30414	NKTR	0.118211812686954	3.32187036756798	1.9734837903465	0.110160242816755	0.822903519863698	-4.25497257598869
Q9Y580	RBM7	-0.163054908591905	3.33792886355735	-1.78129176116494	0.139775180686558	0.822903519863698	-4.25507360522794
Q86YS3	RAB11FIP4	0.15577350639131	3.31111090401195	1.77964795973682	0.140061516531757	0.822903519863698	-4.25510877016999
P41223	BUD31	-0.194041081409567	3.33904926521783	-1.79550638189114	0.137324187377086	0.822903519863698	-4.25532615391849
Q96A37-1	RNF166	-1.97531508563102	3.95088916044518	-7.46209605254751	0.000957564618103637	0.822903519863698	-4.25578044053442
Q9NWZ3-1	IRAK4	-0.21686941413447	3.30765815234173	-1.78538402129445	0.139064965658993	0.822903519863698	-4.25623719604322
Q9H1A4	ANAPC1	0.120390971955127	3.31264951539993	2.08864893266975	0.0956523359981662	0.822903519863698	-4.25672832854563
Q9BRP1	PDCD2L	-0.28765191356315	3.3243335024237	-1.77633515198284	0.140640418639814	0.822903519863698	-4.25749527067048
O00469-2	PLOD2	0.119496997272648	3.38247573559592	1.98710227891604	0.108328876797504	0.822903519863698	-4.25888089211955
Q969N2	PIGT	0.136015286671197	3.31613196730524	1.8484021987672	0.128587704396628	0.822903519863698	-4.2599055233725
Q8N9I9-2	DTX3	-0.18941731699041	3.33401556590645	-1.77603350366425	0.140693253101158	0.822903519863698	-4.26143103516882
Q9C0F1-1	CEP44	0.14593437066807	3.32137194949008	1.80946930911184	0.134959836159862	0.822903519863698	-4.26154701638597
P06400	RB1	0.0711894819258077	3.30480060817737	2.14507076892682	0.0893026235303052	0.822903519863698	-4.26199708201178
P61964	WDR5	-0.12865354320729	3.34993331098461	-1.9376578347878	0.115135986294999	0.822903519863698	-4.26210917683915
P62330	ARF6	0.150652593412183	3.31092916445976	1.77692550592428	0.140537075854922	0.822903519863698	-4.26278787701144
Q9BQ69	MACROD1	-0.132985661371098	3.30627170864893	-1.76860339721652	0.14200113346717	0.822903519863698	-4.26304129441514
A6NIH7	UNC119B	-0.474865490238576	3.3616148810369	-1.78030846386284	0.139946389822805	0.822903519863698	-4.26323209060675
P61916	NPC2	0.334134962860661	3.30140077838791	1.7692112633769	0.141893665186152	0.822903519863698	-4.2632367339083
Q15067	ACOX1	0.161940827726314	3.31809126368128	1.91143228441752	0.118928172969367	0.822903519863698	-4.26374520722518
Q5VIR6-4	VPS53	0.106672612591527	3.30988207434447	2.02455561204935	0.103456773420805	0.822903519863698	-4.26481794114889
Q15717-2	ELAVL1	0.0854784068054632	3.31659454108282	2.00150808904254	0.106426688158149	0.822903519863698	-4.26516545205923
Q3ZCW2	LGALSL	-0.479586011255909	3.38986391484142	-1.77626802148036	0.140652174946009	0.822903519863698	-4.26531540625999
P36959	GMPR	-0.309863058351629	3.32110746542864	-1.81350994973966	0.134283525885902	0.822903519863698	-4.26556041194641
Q9BQ52-1	ELAC2	-0.125086856630958	3.31714101038998	-2.12268409455197	0.0917661253341783	0.822903519863698	-4.26614839093042
Q13523	PRPF4B	0.173459583772442	3.31429297528998	2.10024378115059	0.0943089503315602	0.822903519863698	-4.26668167898184
P16455	MGMT	-0.501820970194786	3.29493693439039	-1.768975411916	0.141935352821638	0.822903519863698	-4.2674973814677
Q969J3-1	LOH12CR1; BORCS5	-0.229092373854461	3.34475496191808	-1.77711469630932	0.140503974223315	0.822903519863698	-4.26790853391582
Q9GZS3	WDR61	-0.216816739315913	3.3400795071133	-1.94114743719594	0.114641067847469	0.822903519863698	-4.26850375304571
Q5T1C6	THEM4	-0.188957827997677	3.3079709976557	-1.76297068733118	0.14300096939022	0.822903519863698	-4.2693875640815
P05165-1	PCCA	-0.0763548557437084	3.2948836009271	-2.0109579942193	0.105198159666731	0.822903519863698	-4.26992800403676
P36507	MAP2K2	-0.324562546338651	3.32255189438897	-2.02122209821845	0.103880827417106	0.822903519863698	-4.2702106073391
Q9BYC5	FUT8	0.142592936487373	3.30559042213041	1.80449754434831	0.135796840045482	0.822903519863698	-4.27047950214733
Q9UFC0	LRWD1	-0.116875666700299	3.31690948975055	-1.86603300093254	0.125805830591318	0.822903519863698	-4.27097408243923
Q9NZZ3	CHMP5	0.166411898550057	3.32096590569082	1.79315737853342	0.137726137207436	0.822903519863698	-4.27108934959926
O43301	HSPA12A	0.157529384523121	3.31658570611765	2.00502288438554	0.105967980200388	0.822903519863698	-4.27138446632
Q9UMS6-2	SYNPO2	0.104353617200276	3.31707420581689	1.96914757853656	0.110750213813751	0.822903519863698	-4.27203219859313
Q9NPC8	SIX2	-0.182544012918216	3.33515395364962	-1.77224016129937	0.141359415832041	0.822903519863698	-4.2726692163935
Q495W5-1	FUT11	-0.206703497923348	3.32923097664271	-1.75435913891389	0.144543589206434	0.822903519863698	-4.27341977341361
Q4G0S7	CCDC152	0.14812180990497	3.28540896081065	1.7544401955786	0.144528989723156	0.822903519863698	-4.27397177672435
Q9UK61	FAM208A	0.102181965057087	3.303418677632	2.02734961337539	0.1031027686881	0.822903519863698	-4.27400588838464
Q6IPR3-1	TYW3	-0.180463875907657	3.33285718976164	-1.75716901998861	0.144038372273122	0.822903519863698	-4.27401572339639
Q96AT9	RPE	-0.248735247326526	3.3057643814427	-1.75391021880013	0.144624473690915	0.822903519863698	-4.27422447757499
O43920	NDUFS5	-0.149080887275855	3.3028418288898	-1.81606139469646	0.133858282952179	0.822903519863698	-4.27439459621586
Q9UBS9-1	SUCO	-0.121436860470994	3.2963437133916	-1.76293143363104	0.143007962500302	0.822903519863698	-4.27442424501104
O94830	DDHD2	0.1107244039062	3.30436985850714	1.90221588484956	0.120291825054394	0.822903519863698	-4.27454019530479
Q7Z3B4	NUP54	0.0915562199651183	3.30364718126865	2.07247183231464	0.0975609609365645	0.822903519863698	-4.27485235075204
Q5VVQ6-1	YOD1	-0.213517388463255	3.32178817261751	-1.75269386757911	0.144843864435902	0.822903519863698	-4.27580030955582
Q96PE7	MCEE	-0.150165437488161	3.2844088829531	-1.74763300459334	0.14576035890001	0.822903519863698	-4.27799176940086
P05091	ALDH2	-0.10810685311502	3.29213731505828	-2.02776552313466	0.103050182499533	0.822903519863698	-4.27801362405587
Q5TC12-1	ATPAF1	-0.187879083641766	3.30565433170787	-1.77771694073641	0.140398656255785	0.822903519863698	-4.27865099251089
Q9C0B0	UNK	0.107984541907492	3.29548604203799	1.97546001818282	0.109892467001458	0.822903519863698	-4.27869007776152
Q8N0V3-1	RBFA	-0.131676950571195	3.28052163362512	-1.74922945506767	0.145470609154113	0.822903519863698	-4.27952242048167
Q13216-1	ERCC8	-0.237236365989911	3.34598194048505	-1.74511703764613	0.146218200745562	0.822903519863698	-4.27995765570536
Q9H4L4	SENP3	0.123430523016215	3.32968368809957	1.94469591253124	0.114140097661525	0.822903519863698	-4.28033562165319
Q96H79	ZC3HAV1L	-0.126113711132036	3.32043165233099	-1.84866812242141	0.128545272822256	0.822903519863698	-4.28044847454286
P30044-1	PRDX5	-0.315333763682107	3.3474026054582	-1.92772827956567	0.116556608773315	0.822903519863698	-4.28059586909331
Q86YH2	ZNF280B	-0.207574840784367	3.32265123571379	-1.75123082035164	0.145108204337595	0.822903519863698	-4.28067812230205
O95619	YEATS4	0.137753443546979	3.32831042506118	1.78639616087242	0.138889883343091	0.822903519863698	-4.28325821670336
Q9BQI0	AIF1L	0.179039081859966	3.33301956918364	1.74214285451771	0.146761330509527	0.822903519863698	-4.28361114422117
Q96CX3-1	ZNF501	-0.312642004242054	3.3323178603678	-2.08538231598943	0.0960344977452482	0.822903519863698	-4.28432393850445
A6NNA2	SRRM3	0.199637222585657	3.31094331432496	1.73803711302161	0.147514502104774	0.822903519863698	-4.2848399100159
Q9Y508-1	RNF114	-0.15411833514664	3.31611286986282	-1.81093375363551	0.134714314959065	0.822903519863698	-4.28505986196944
A8MPS7-1	YDJC	-0.568548436257971	3.3089811752538	-2.54317372047369	0.0556280021763696	0.822903519863698	-4.28561759003774
Q9UGP4	LIMD1	-0.135760024369456	3.27757005371104	-1.7620181251624	0.143170769266341	0.822903519863698	-4.28577941614691
Q8NCG7	DAGLB	0.138162735063366	3.29692976944026	1.79515540637586	0.13738416742141	0.822903519863698	-4.28659162619374
P05161	ISG15	-0.693202343088904	3.33813096983468	-1.99089520161918	0.107824577763742	0.822903519863698	-4.28733564603475
Q9UKB3-1	DNAJC12	0.159977145514791	3.30824164272941	1.75832390420838	0.143831250746611	0.822903519863698	-4.28766316623766
Q9UC06	ZNF70	-0.227577934880287	3.33517915384281	-1.81162484283414	0.134598611295076	0.822903519863698	-4.28801878924551
P09234	SNRPC	-0.18581441707741	3.33775841862844	-1.82584297772044	0.132240910510047	0.822903519863698	-4.28817980404375
Q8TF01	PNISR	0.19396122739443	3.31832322525785	1.78451443962762	0.13921556995377	0.822903519863698	-4.28859636847196
P02462	COL4A1	-0.453314464451934	3.28211501605705	-1.79531215504805	0.137357376473192	0.822903519863698	-4.28873989114058
Q96L91	EP400	0.0946319264469506	3.31490127293358	2.2466949901791	0.0789829718674876	0.822903519863698	-4.28876511763102
Q8TB37-1	NUBPL	-0.153062412163822	3.29038489992429	-1.78839745259085	0.138544364831442	0.822903519863698	-4.28935426253726
Q6ZW49	PAXIP1	0.139155270248264	3.30495126016775	1.8998933101411	0.120638052409616	0.822903519863698	-4.29001221569936
P82663	MRPS25	-0.157292111202254	3.30145276038591	-1.74302069700903	0.146600808511842	0.822903519863698	-4.29003248960324
O95235	KIF20A	0.108404042513435	3.32512407301971	2.15172538144119	0.0885841215880028	0.822903519863698	-4.2906882094484
P14550	AKR1A1	-0.390804857027088	3.3516663921011	-1.87862072497313	0.123858158833384	0.822903519863698	-4.29182051797351
Q9Y5V0	ZNF706	-0.130126959748687	3.29825658371844	-1.74405548268267	0.146411819250974	0.822903519863698	-4.29185661743792
P49406	MRPL19	-0.121126093444811	3.31044696466433	-1.78510315313899	0.139113591282599	0.822903519863698	-4.29208956120668
Q7Z5J4	RAI1	0.141014151648886	3.31496669846674	2.23279840025969	0.0803145585888805	0.822903519863698	-4.29282919933328
Q8IZ21-2	PHACTR4	0.0941289919966182	3.30971145029993	1.83284083661682	0.131096282251355	0.822903519863698	-4.29397548438849
Q9HBL7	PLGRKT	-0.157081062764356	3.32965569868531	-1.73279639052477	0.148481639503648	0.822903519863698	-4.29427270143675
Q96T23	RSF1	0.123289158198931	3.32865648241673	2.27756342709422	0.0761101705204305	0.822903519863698	-4.29456048289539
Q96EE3-1	SEH1L	0.086964943176233	3.30777779403171	2.03766134156851	0.101807372434857	0.822903519863698	-4.29456371107021
P53582	METAP1	-0.195362802498398	3.32193446691775	-1.94750350628567	0.113745359697999	0.822903519863698	-4.29466079966967
Q9UBF6	RNF7	-0.293965902364518	3.31801367120198	-1.90515308348281	0.119855466967767	0.822903519863698	-4.29494529172469
Q8WV07	ORAOV1	-0.292324847325656	3.36504480991092	-1.73234473352565	0.148565293059425	0.822903519863698	-4.29507029572837
O94906-1	PRPF6	0.0817484870621501	3.31383991130228	2.3513834125678	0.0696914711097517	0.822903519863698	-4.29529650900708
Q15532	SS18	0.209761263209993	3.31693162686859	1.73909334074821	0.14732036608567	0.822903519863698	-4.29588165195576
Q96H55-1	MYO19	0.10042358841342	3.30035530646169	1.81853981811562	0.133446547208145	0.822903519863698	-4.29624228597746
Q9Y4H2	IRS2	0.0947291355147676	3.32214619964413	1.81217425197379	0.134506701495705	0.822903519863698	-4.29893403341428
Q5T5C0-1	STXBP5	0.111808996886391	3.30934756625216	1.7746631060114	0.140933539485128	0.822903519863698	-4.29928767728914
Q9NRG4	SMYD2	0.121936126872242	3.29013713303728	1.79634049028069	0.137181750836773	0.822903519863698	-4.29937785025236
O43670-4	ZNF207	0.0831514833508726	3.32612280205098	1.88004776946893	0.123639352590939	0.822903519863698	-4.2995689163639
Q8TCD5	NT5C	-0.399655324947595	3.34931234988326	-1.71799171746237	0.151248964445717	0.822903519863698	-4.2999992648431
Q15418-2	RPS6KA1	0.149665868928203	3.30041197207936	1.92165259543054	0.117434941848048	0.822903519863698	-4.30262478155629
Q92544	TM9SF4	0.12405572236735	3.31132590496648	1.87510336886266	0.124399199301646	0.822903519863698	-4.30264135070913
O95343	SIX3	-0.237909702966832	3.3533879641467	-1.73047826562703	0.148911502806139	0.822903519863698	-4.30279452826422
P41252	IARS	0.12222525920894	3.31135303837485	2.39377837540737	0.0662747805482283	0.822903519863698	-4.30282803184541
P30085-1	CMPK1	-0.141777188486608	3.32340189372472	-1.73034898430645	0.148935513680384	0.822903519863698	-4.30300546754672
Q76FK4	NOL8	0.115191657964966	3.31358299885124	2.05832572641256	0.0992633440128857	0.822903519863698	-4.30307556545323
P38571	LIPA	0.135545340845598	3.31112741766154	1.74263854903226	0.146670665816995	0.822903519863698	-4.30326745237372
Q9Y2Y1	POLR3K	-0.258822322254385	3.31725393218909	-1.7220683623315	0.150481724506334	0.822903519863698	-4.30365650622024
Q9Y3Z3	SAMHD1	-0.182689640156976	3.32574242659219	-1.99286623496393	0.107563496101499	0.822903519863698	-4.30418894961151
Q53RE8	ANKRD39	-0.156122399062797	3.31676960933542	-1.71328282572467	0.152140174004567	0.822903519863698	-4.30428878381272
P23508-1	MCC	0.113031432067496	3.31966866811985	1.96544304973041	0.111256885766757	0.822903519863698	-4.30465096786988
Q66LE6	PPP2R2D	-0.205907620686335	3.32737912520202	-1.72364469960477	0.150186119970139	0.822903519863698	-4.30477305267448
P49841-2	GSK3B	0.0776442842336308	3.33093679764152	1.91734977894424	0.11806118680324	0.822903519863698	-4.30674611473572
O15127	SCAMP2	0.229313482624691	3.30221610548857	1.70893283000262	0.152968224419625	0.822903519863698	-4.30674939547664
P36955	SERPINF1	-0.155037037682171	3.35503908073368	-1.70825336228994	0.153097980426646	0.822903519863698	-4.3067545444542
Q9Y6Q9-1	NCOA3	0.0972942313931395	3.32559410339821	1.88676581371781	0.122614705177129	0.822903519863698	-4.30690457897811
Q9BTY7	FAM203B; FAM203A; HGH1	-0.329193927050989	3.3199282067658	-1.74714150885627	0.145849682779984	0.822903519863698	-4.3081040099999
O15037	KHNYN	-0.155723199067813	3.30773136330212	-1.74382038590526	0.146454734459864	0.822903519863698	-4.30857495904124
Q06546	GABPA	0.236651560427886	3.30482076731894	1.7850796126413	0.139117667555637	0.822903519863698	-4.30895209973129
Q7Z5Y7	KCTD20	-0.165393373855023	3.32460989868617	-1.70343447228795	0.154021458557027	0.822903519863698	-4.30942024325125
Q9C037-1	TRIM4	0.112338325725883	3.27013504629083	1.73960305188565	0.14722677426011	0.822903519863698	-4.30997230326224
P11908-2	PRPS2	-0.108651807944786	3.36044015161045	-1.7842140615094	0.139267632058277	0.822903519863698	-4.30999871889268
Q06136	KDSR	-0.164978443774776	3.30358306317601	-1.70131780326447	0.154428884826919	0.822903519863698	-4.31022698241442
Q8N5Y2-1	MSL3	0.123481623815386	3.316412336007	1.81791048786679	0.133550972063678	0.822903519863698	-4.31053410185379
P01130	LDLR	0.09591764553581	3.30123748194244	1.8988391030493	0.120795548164827	0.822903519863698	-4.31102486550977
Q9H0N5	PCBD2	-0.161207698700552	3.30955695670473	-1.7014600699974	0.154401466252547	0.822903519863698	-4.31113410240822
Q96M89-1	CCDC138	0.0815184599193388	3.31302752567814	1.82897229776248	0.131727774917185	0.822903519863698	-4.31156068964171
Q03393	PTS	-0.155082587372543	3.32142869710577	-1.69816987330941	0.155036845932568	0.822903519863698	-4.31273250135649
O95218-1	ZRANB2	0.129927208382727	3.29821036101471	1.86350241796819	0.126201228876738	0.822903519863698	-4.31293701547633
P00966	ASS1	-0.262432537980038	3.32839186798309	-1.88535913770423	0.122828515947653	0.822903519863698	-4.31299160388042
O14828	SCAMP3	0.199290949230971	3.28029049515082	1.70207114244644	0.154283752806228	0.822903519863698	-4.31320683828183
Q9UKN8	GTF3C4	0.0564679226240248	3.31839944133041	2.20653210713696	0.0828984190424213	0.822903519863698	-4.31439992398554
Q6ICG6-1	KIAA0930	0.157963525426173	3.29649142989913	1.75739474264637	0.143997866173662	0.822903519863698	-4.31506697398261
Q7Z401-1	DENND4A	0.0770774286525533	3.31194263659391	1.94050808422584	0.114731577134405	0.822903519863698	-4.31529677090201
Q9NXF8-1	ZDHHC7	0.247531573148194	3.25815034070812	1.7736943825917	0.141103651253016	0.822903519863698	-4.31610989645123
Q9BWU0	SLC4A1AP	0.0944445595591158	3.31866019876427	1.91874131097734	0.117858275942954	0.822903519863698	-4.31622540998566
Q8WZ82	OVCA2	-0.334000618545248	3.32540771272629	-1.69313624984367	0.156014063481918	0.822903519863698	-4.31625150690862
Q8NI37	PPTC7	-0.147604261162933	3.31795751976215	-1.69188397876212	0.156258149721862	0.822903519863698	-4.31670279975608
Q8NFH4	NUP37	-0.247518945599334	3.36174828621681	-1.72754436494908	0.149457380785485	0.822903519863698	-4.31701465756566
Q09328	MGAT5	0.156076360508794	3.31690336894677	1.84721115460176	0.128777930017182	0.822903519863698	-4.3176758355257
Q3LXA3	DAK; TKFC	0.190144139193542	3.30541862657542	1.92643831792116	0.116742513062905	0.822903519863698	-4.31770287385466
P32119	PRDX2	-0.404385373493133	3.36030415212951	-1.96096755416547	0.111872272370825	0.822903519863698	-4.31850639673195
P63272	SUPT4H1	-0.325861575934996	3.36252669625501	-1.71064087482559	0.152642539514311	0.822903519863698	-4.31862495106127
Q9Y4C2-1	FAM115A; TCAF1	0.172276407023248	3.3127133997779	1.99537118792889	0.107232658369204	0.822903519863698	-4.31922553668283
O95425	SVIL	0.10288155217971	3.29984205741699	2.08298427797763	0.0963160845373482	0.822903519863698	-4.31940247856917
P23588	EIF4B	-0.0710644286323532	3.31763189235479	-2.06283687667973	0.0987170391772986	0.822903519863698	-4.32011525746764
P19404	NDUFV2	-0.141339494131737	3.2778741218278	-1.84042760887095	0.129866952815954	0.822903519863698	-4.32017456900895
Q6NXT4-2	SLC30A6	0.166633111459736	3.31081517193799	1.68665570218947	0.157281424193688	0.822903519863698	-4.32023474679037
Q7Z3D6-2	C14orf159	-0.122634613984177	3.28426003463416	-1.74944139905911	0.14543218661891	0.822903519863698	-4.32051099647862
O60502	MGEA5	0.0700262468449321	3.33091271563068	2.12540178433786	0.0914632030361497	0.822903519863698	-4.32079095379354
Q5VUJ6	LRCH2	-0.109869517905932	3.32610384611794	-1.90485942326927	0.119899019117795	0.822903519863698	-4.3209951924518
O95865	DDAH2	-0.28726083278992	3.33084099778944	-1.87570722705129	0.124306138344941	0.822903519863698	-4.32198382706043
Q9NTM9	CUTC	-0.140316163045675	3.33854756328841	-1.71059818083792	0.152650671644852	0.822903519863698	-4.32222998564339
Q9BUF5	TUBB6	-0.165969783804588	3.31369495087639	-1.73012932557907	0.148976319060603	0.822903519863698	-4.32251457312078
O95861-1	BPNT1	-0.124245852697707	3.34585328632871	-1.83718970636482	0.1303901364213	0.822903519863698	-4.32252732716536
Q9BRK5-1	SDF4	0.135686407304931	3.31423562784853	1.93739863722881	0.115172837083967	0.822903519863698	-4.32399374098529
P51513-1	NOVA1	0.0970073422070431	3.32922293854818	1.81230464745646	0.134484897390242	0.822903519863698	-4.32413841788142
Q8IWZ8-1	SUGP1	0.0921544489197076	3.32204059681396	1.97495688484194	0.109960575396399	0.822903519863698	-4.32428717778269
P78560	CRADD	-0.690952186775535	3.31662192825825	-1.92398558839802	0.117096851695601	0.822903519863698	-4.32436144187028
Q9Y4C8	RBM19	0.0885063147936518	3.32583906049023	2.02717886328052	0.103124366004339	0.822903519863698	-4.32438448150688
Q96DF8	DGCR14; ESS2	0.22086569038555	3.31041576432713	1.85474995906203	0.127578807983592	0.822903519863698	-4.32462359340085
P62249	RPS16	-0.0583773204373992	3.31797882234902	-2.11565393210381	0.0925547401985857	0.822903519863698	-4.32547874511151
Q9NP97	DYNLRB1	-0.189424807158751	3.32708201623771	-1.8510116359525	0.128171964785085	0.822903519863698	-4.32557835081401
O75643-1	SNRNP200	0.0795471090643797	3.32145982490941	2.6439594906105	0.0495211387793723	0.822903519863698	-4.32668021442283
O15550	KDM6A	0.103634041843438	3.31609128886279	1.96595617110206	0.111186559755225	0.822903519863698	-4.32685876378719
Q96BS2-1	TESC	-0.302524492080239	3.38194575283071	-1.70726596156099	0.153286741774995	0.822903519863698	-4.3273265046377
Q9UL63-1	MKLN1	-0.152457101827109	3.33772132800819	-1.88826999034704	0.122386505521678	0.822903519863698	-4.32734828992721
Q93045-2	STMN2	0.259868002001026	3.29058166840967	1.67992899249719	0.158608002708522	0.822903519863698	-4.32743091534313
Q9BY42	RTFDC1	0.151078340033104	3.31223411605845	1.8964335611763	0.121155737293777	0.822903519863698	-4.32779876379412
P39656	DDOST	-0.0912613382968369	3.31320636771445	-1.76926181820312	0.14188473107143	0.822903519863698	-4.32795378586461
Q96AJ1-1	CLUAP1	0.188956481028812	3.30504768015033	1.70932368833276	0.152893634181957	0.822903519863698	-4.32824736953127
Q9BT88	SYT11	-0.136438780023939	3.38359966079173	-1.76424325341937	0.142774450230916	0.822903519863698	-4.32903633213663
Q8IY22-1	CMIP	0.138751467380085	3.30770818176583	1.80662393083991	0.135438203767449	0.822903519863698	-4.32926006188271
Q8NDF8-5	PAPD5	0.14042323442088	3.30872909294689	1.82120864079806	0.133004649447361	0.822903519863698	-4.32987924799198
Q96NB3	ZNF830	0.106154895677503	3.33325638497913	1.83783225466378	0.130286138731646	0.822903519863698	-4.32993102967019
Q9Y6J0	CABIN1	0.111084879734145	3.31563356779498	2.05700187885701	0.0994242751411781	0.822903519863698	-4.3302962005699
Q9NUL7	DDX28	-0.111784853157495	3.28081671425723	-1.8198436576202	0.133230470360315	0.822903519863698	-4.3305155104162
Q8TCZ2	CD99L2	0.117840811072266	3.35498306047906	1.68124828154317	0.158346931415739	0.822903519863698	-4.33089057898716
Q9BVS4	RIOK2	0.126463788271831	3.31244895125718	1.79001996840079	0.138264892857663	0.822903519863698	-4.33097586914956
Q7L5Y6-2	DET1	0.247877281456198	3.30860486611046	1.67182009241136	0.160222284372314	0.822903519863698	-4.33147146413171
Q8TF76-1	GSG2; HASPIN	-0.112725437715638	3.31044536346859	-1.70466761333244	0.153784603323781	0.822903519863698	-4.3321713543934
Q06033-1	ITIH3	0.139808391280837	3.33959435572104	1.66967081920915	0.160652940393955	0.822903519863698	-4.33257888498692
Q53EL9-1	SEZ6	0.109186281793697	3.29661300343964	1.81225581265959	0.134493062881019	0.822903519863698	-4.33282131527664
Q8WWZ7-1	ABCA5	0.241148140151134	3.26337702102129	1.70404534098773	0.153904079649441	0.822903519863698	-4.33289466659943
Q9HCD6-2	TANC2	0.299528443496499	3.27883626045008	1.86585377513852	0.125833791654822	0.822903519863698	-4.33389512449557
Q9C0I3	CCSER1; FAM190A	0.273339948036531	3.2568916203827	1.71054255881278	0.152661266904789	0.822903519863698	-4.33418129838109
P49441	INPP1	0.311812765473881	3.27989986028458	1.73423738707544	0.148215068082095	0.822903519863698	-4.33513851060219
Q9UMZ2-1	SYNRG	0.117762198185769	3.32266848329322	2.03561306093903	0.10206329895443	0.822903519863698	-4.33525730741839
Q9BTT4	MED10	-0.296067191638854	3.35263617912809	-1.67612599402364	0.159363019405335	0.822903519863698	-4.33546995630973
Q8TB61	SLC35B2	0.169043408756033	3.3376682337435	1.66997545182362	0.160591828940612	0.822903519863698	-4.33713269216515
Q96JC1-1	VPS39	0.101428908251966	3.29895883795908	1.96357305972647	0.111513575834724	0.822903519863698	-4.33742845543844
Q9BZE1	MRPL37	-0.125365497339973	3.27691420162936	-1.81052436963058	0.134782903527626	0.822903519863698	-4.33799307001536
Q6UWP2	DHRS11	-0.188683039073435	3.32541095635888	-1.65978614109795	0.162648721460774	0.822903519863698	-4.33820291291246
P62136-1	PPP1CA	0.175003844455831	3.34228977441576	1.67212814742809	0.160160654539143	0.822903519863698	-4.33868561771098
P78417	GSTO1	-0.364122456058161	3.37998645252426	-1.80832438123636	0.135152111720014	0.822903519863698	-4.33878645428788
Q9UHH9	IP6K2	-0.189818416208274	3.25131534222293	-1.68556678676371	0.157495402220661	0.822903519863698	-4.34022845041546
Q02535	ID3	-0.508519784922786	3.33780912081682	-1.75228053500707	0.144918494201618	0.822903519863698	-4.34082981195752
P10768	ESD	-0.343585159247763	3.34307010247293	-1.98187383904508	0.109028138413514	0.822903519863698	-4.34085143043391
Q7L266	ASRGL1	-0.168864463006885	3.3143912424808	-1.76772895714344	0.142155877999483	0.822903519863698	-4.34091813819308
Q9ULH7-5	MKL2	0.134679875808742	3.30668293618575	1.87413937349332	0.124547912144404	0.822903519863698	-4.34096957247997
Q9BPX3	NCAPG	0.0863002016881979	3.31078414304594	2.07369316595085	0.0974154521002458	0.822903519863698	-4.34177519952538
Q969F1	GTF3C6	0.202319919807875	3.30734176887996	1.69587165429823	0.155482241777013	0.822903519863698	-4.34201276774371
O00410-3	IPO5	0.079646614938439	3.31498629145899	2.4268949508592	0.0637338045686741	0.822903519863698	-4.34205448786221
Q9P021	CRIPT	0.112547218255528	3.30252597112249	1.70035548619034	0.154614479243575	0.822903519863698	-4.3428004335862
Q6ZRS2	SRCAP	0.12445086453453	3.31087214840064	2.04086099045872	0.101408952842586	0.822903519863698	-4.34300737210524
P25686-3	DNAJB2	0.121652911235059	3.33771228391466	1.6604457816284	0.162514756911466	0.822903519863698	-4.34304111019308
Q15813-2	TBCE	-0.167642007006051	3.34408620274812	-1.90709000586544	0.119568621385518	0.822903519863698	-4.34343936401701
P61803	DAD1	-0.19454094396658	3.38487810140717	-1.66061214587294	0.162480988109295	0.822903519863698	-4.34392769979409
Q9Y6M9	NDUFB9	-0.142842280755833	3.28188295062239	-1.65495739214229	0.163632789014194	0.822903519863698	-4.34485279873793
Q9HBH5	RDH14	0.193480067361414	3.2862935984992	1.7051515498325	0.153691752885262	0.822903519863698	-4.34521600043165
Q9UP95	SLC12A4	0.124372839658814	3.29024069982754	1.65775586738873	0.163061746125363	0.822903519863698	-4.3453038004593
O43414-1	ERI3	0.247297441558367	3.31112808796622	1.74433638639596	0.146360559239896	0.822903519863698	-4.34544799695023
Q14686	NCOA6	0.0987626346646965	3.3123912955473	1.91419273753923	0.118522903324654	0.822903519863698	-4.34555359556908
Q9NX01	TXNL4B	-0.350114907708559	3.38972113646907	-1.65394158036815	0.163840570677918	0.822903519863698	-4.3456761523872
Q9BRS8	LARP6	0.118716779340026	3.31615640101161	1.70491030795805	0.153738031588577	0.822903519863698	-4.34591486457189
Q15814	TBCC	-0.206641277835201	3.33809020584364	-1.68160401416433	0.158276611017239	0.822903519863698	-4.34642762497321
Q8N9N2-2	ASCC1	0.1306889167145	3.33696622469073	1.68616338336141	0.157378130981039	0.822903519863698	-4.34656291405594
Q9UNW1	MINPP1	0.0731902692360424	3.33791642686389	1.85485128330075	0.127562770823569	0.822903519863698	-4.35005404509577
Q96I15-1	SCLY	-0.145209023647232	3.32642821148656	-1.77876336034614	0.140215856397131	0.822903519863698	-4.35013752305354
Q92621	NUP205	0.118422009236411	3.31973649430016	2.23436973436055	0.0801627767371761	0.822903519863698	-4.35098726694057
Q86YT6	MIB1	0.122582468848563	3.28707284161376	1.92720784455568	0.116631574355758	0.822903519863698	-4.35133325699474
Q9H4Z3	PCIF1	0.115025308723528	3.30435301328259	1.91571320545596	0.118300298952549	0.822903519863698	-4.35199050652728
Q96C00	ZBTB9	-0.216634148906935	3.32425280869976	-1.6721422766339	0.160157828411295	0.822903519863698	-4.35275608474467
Q9UL33-1	TRAPPC2L	-0.237259439072131	3.38778559624238	-1.68200788123552	0.15819681397784	0.822903519863698	-4.35280982251088
Q9H7Z6	KAT8	0.154170630385049	3.29351607562006	1.8577052985926	0.127111911897169	0.822903519863698	-4.35305342130032
Q9BT04-1	FUZ	0.3450172616601	3.31263526785195	1.74455919622337	0.14631991344456	0.822903519863698	-4.35307493916673
Q08722	CD47	0.318167260709686	3.3160628604395	1.65229171061718	0.164178616159625	0.822903519863698	-4.3532568770708
O75044	SRGAP2	0.100676570076457	3.30101664032061	1.94444298628032	0.114175729055257	0.822903519863698	-4.35332570755366
P62312	LSM6	-0.208203685774579	3.32529038960159	-1.70599670076739	0.153529735186976	0.822903519863698	-4.35389891939275
Q13492-1	PICALM	0.178364051375891	3.3120687787578	1.92006140369521	0.11766612094692	0.822903519863698	-4.35471599355982
Q53TQ3-2	INO80D	0.231391846623073	3.27265958175194	1.64171034469379	0.166363479274216	0.822903519863698	-4.35486066985513
O14744	PRMT5	0.169994627456607	3.31885933534806	2.07841185802932	0.0968554467856975	0.822903519863698	-4.35515376749471
Q96PB1	CASD1	0.206662898124844	3.30201966987772	1.6601630847806	0.16257215533672	0.822903519863698	-4.35591938137377
P49419-2	ALDH7A1	-0.125210015776829	3.32902200362962	-2.09553725034966	0.0948517983889013	0.822903519863698	-4.35600431775022
Q8TA86	RP9	0.195074310463351	3.31440841470038	1.68632115655422	0.157347132817789	0.822903519863698	-4.35741758795365
Q9HD45	TM9SF3	0.131455878759078	3.3102463514416	1.98117340625656	0.109122178031975	0.822903519863698	-4.35751868549594
Q14155-5	ARHGEF7	0.0837489790181847	3.335767857168	1.92209629823563	0.117370562864844	0.822903519863698	-4.35752473563412
Q6ZV73-1	FGD6	0.0863752234772695	3.31763368142384	1.9446580643644	0.114145428837281	0.822903519863698	-4.35770384312054
Q02338	BDH1	-0.20705798938376	3.27158736177833	-1.64644669870702	0.165381898193238	0.822903519863698	-4.35801573802531
Q9UHF0-1	TAC3	-0.434580863923399	3.31896742825173	-2.00090774348972	0.106505248330939	0.822903519863698	-4.35807968349053
Q9Y2K7	KDM2A	0.138343894053828	3.31734375663983	1.97689616332952	0.109698303600569	0.822903519863698	-4.35808449522803
Q9NYV4-1	CDK12	0.10896207671066	3.30336433641218	2.02824763564494	0.102989261574265	0.822903519863698	-4.35827559929901
Q8NEZ4-3	KMT2C; MLL3	0.090003879061158	3.30250217287098	2.08275142930112	0.0963434735452306	0.822903519863698	-4.35899167457449
Q15126	PMVK	-0.251353389682939	3.35256526893067	-1.63834841734297	0.167063785698498	0.822903519863698	-4.35910408290622
Q8N442	GUF1	-0.0880397041255892	3.28217575226728	-1.78432656383746	0.139248130587903	0.822903519863698	-4.35961756922342
P42773	CDKN2C	-0.127507644487866	3.34802155120869	-1.63505690763732	0.167752305043461	0.822903519863698	-4.35970878851362
Q8NE00	TMEM104	0.393377836577286	3.25546972034719	1.84864747512437	0.128548566844559	0.822903519863698	-4.36159518140622
Q9H977	WDR54	0.126136390073189	3.32289046556428	1.70718012499614	0.153303162362958	0.822903519863698	-4.36160536969412
Q15008	PSMD6	0.145051639671185	3.31681594376683	1.98148134113355	0.109080824337769	0.822903519863698	-4.36251120994959
Q9NP08	HMX1	-0.425612236118515	3.33886362040052	-1.82992949818067	0.131571229727422	0.822903519863698	-4.36253013943391
P31939	ATIC	-0.285051700426173	3.31900438248385	-2.31189725133483	0.0730479068484437	0.822903519863698	-4.36331226268593
Q6JQN1	ACAD10	-0.123585616525813	3.27705886349229	-1.70518513823882	0.153685310570911	0.822903519863698	-4.36353763247743
P49750-4	YLPM1	0.153397217776467	3.31206361450335	2.33980224091471	0.0706580728443266	0.822903519863698	-4.36401669978736
O60678	PRMT3	0.159697635979586	3.31839040053577	1.85844846103468	0.126994784750169	0.822903519863698	-4.36427431294999
P30532	CHRNA5	-0.114929770593128	3.3043037270115	-1.65869134923186	0.162871306507077	0.822903519863698	-4.36472147586416
Q96A58	RERG	-0.123767282962979	3.33882616165065	-1.62694795957499	0.169460766665872	0.822903519863698	-4.36491083066821
Q7Z2K6	ERMP1	0.262984250381	3.29996915586	1.64765914945658	0.16513156677027	0.822903519863698	-4.36510051212293
Q99714-1	HSD17B10	-0.106559582898238	3.28983022534909	-1.94783907544459	0.113698276221747	0.822903519863698	-4.36564883504475
Q8ND25-1	ZNRF1	-0.257897569597542	3.31348051947684	-1.65178530279938	0.164282516598105	0.822903519863698	-4.36573036854722
P28161	GSTM2	0.132359210901698	3.31684134820633	1.88654618419694	0.122648062564707	0.822903519863698	-4.366201590282
O00422	SAP18	-0.118202292754108	3.31785276941522	-1.915649350107	0.118309638866605	0.822903519863698	-4.36645761563638
O95400	CD2BP2	-0.139487432042273	3.31833741102486	-1.72343619200421	0.15022518649429	0.822903519863698	-4.36694564588968
P35250-1	RFC2	0.105068789186601	3.33819436645189	1.8615238053378	0.126511286239473	0.822903519863698	-4.36860221773655
P49427	CDC34	-0.446260268717921	3.39096314104255	-1.61586680465109	0.17182379812822	0.822903519863698	-4.36879658857
Q8NFZ4	NLGN2	0.213434630114038	3.29387682840509	1.67150859589354	0.160284627181749	0.822903519863698	-4.36896094464596
P27816-1	MAP4	0.157665020750968	3.31347466969109	2.33951934964912	0.0706818667561272	0.822903519863698	-4.36903455394826
Q7L7V1-1	DHX32	0.153011275693199	3.28080806300715	1.6388068039218	0.166968126595874	0.822903519863698	-4.36931999240927
Q93034	CUL5	0.0665205340004043	3.3216730334541	1.98357683525813	0.10879985303262	0.822903519863698	-4.36932418925127
Q03701	CEBPZ	0.131691218194111	3.31940654358153	2.06438622431089	0.0985301530236801	0.822903519863698	-4.3695357424435
Q8NDA8-1	HEATR7A; MROH1	0.236719061400862	3.30123351109033	1.68820677707037	0.156977139661384	0.822903519863698	-4.37109501638779
Q96GA7	SDSL	-0.147082468446442	3.30597453801523	-1.64032881728678	0.166650899135298	0.822903519863698	-4.37173802451341
Q8IXK0-5	PHC2	0.128434756596914	3.3064307332941	1.87902094958692	0.123796752267452	0.822903519863698	-4.37220948010796
Q9BTE0-2	NAT9	-0.225452597535984	3.32118876690498	-1.62977966592688	0.168862175969155	0.822903519863698	-4.372876158758
Q9NRA2	SLC17A5	-0.314692575205874	3.28532775387086	-1.73547402940221	0.147986691379204	0.822903519863698	-4.37441975803772
O00522	KRIT1	0.11483199558507	3.3283327872146	1.84066374138198	0.12982888381588	0.822903519863698	-4.37442625601646
Q15645	TRIP13	0.165351958010944	3.3088524609378	1.85106471434644	0.128163522797401	0.822903519863698	-4.37492094103833
Q96EP9	SLC10A4	0.131345556932128	3.31340200183567	1.65777688679854	0.163057464649266	0.822903519863698	-4.37511137552651
Q9H8M2-5	BRD9	0.125143544282827	3.30065141412555	1.73767361953711	0.147581373328353	0.822903519863698	-4.37648761029207
O60499	STX10	0.286482359625709	3.28955838917331	1.60014548805853	0.175233245819953	0.822903519863698	-4.37697538797669
Q96C23	GALM	-0.272141036233572	3.34361004193793	-1.59969094116264	0.175332825289174	0.822903519863698	-4.3770011719028
Q99549	MPHOSPH8	-0.0770586753233321	3.32884492214661	-1.87129769196271	0.124987372172245	0.822903519863698	-4.37756177624144
Q9UJV9	DDX41	0.108317765856774	3.32685621626792	1.95453725361224	0.112762747206322	0.822903519863698	-4.37760892358263
Q8TE02-4	ELP5	-0.6408729495028	3.33078677802345	-1.69638130406436	0.155383359081571	0.822903519863698	-4.37788987784797
P25208	NFYB	-0.149227622681686	3.31287111222571	-1.6146820024241	0.172078407106578	0.822903519863698	-4.37790305356402
Q9Y5J6	FXC1; TIMM10B	-0.308091191530796	3.30626933041988	-1.62567347795966	0.169730874455915	0.822903519863698	-4.37792805221876
P13521	SCG2	0.134196365300062	3.31180585490739	1.97403340569726	0.110085701577985	0.822903519863698	-4.37833919112662
Q8WXF0	SRSF12	-0.162222206646931	3.31673390659717	-1.66039688777022	0.162524682793247	0.822903519863698	-4.37841410917737
Q8N8R5	C2orf69	-0.151026079160918	3.31843559893013	-1.61999922335146	0.170938718484554	0.822903519863698	-4.37900619795364
P50225	SULT1A1	-0.245720295321242	3.31278740612039	-1.61774269020991	0.17142145224555	0.822903519863698	-4.3790507015355
Q96EK5	KIAA1279; KIF1BP	0.123639296655876	3.3147816315622	1.95142520776787	0.1131963900643	0.822903519863698	-4.37977534105545
P53805	RCAN1	-0.279198169474913	3.3384192017003	-1.7206522558889	0.150747788972496	0.822903519863698	-4.37990755526554
Q8N6N2-1	TTC9B	-0.160982996509009	3.31498984642543	-1.59596287014921	0.176151691267793	0.822903519863698	-4.37999541776178
P34947	GRK5	-0.0803118962103289	3.31955027534071	-1.75187112601603	0.144992454489345	0.822903519863698	-4.37999635371393
Q6IN84-1	MRM1	-0.17045219704203	3.26584945841664	-1.59492491532255	0.176380357534316	0.822903519863698	-4.38005844843535
O60783	MRPS14	-0.217796578918485	3.21938279932918	-1.67475913161002	0.15963527597557	0.822903519863698	-4.38007070296961
P53634-1	CTSC	-0.286507130277826	3.367926401944	-1.80215401872978	0.136193238069757	0.822903519863698	-4.38056047893328
Q5T440	IBA57	-0.133746441862597	3.28845114072679	-1.62714612260095	0.169418807795293	0.822903519863698	-4.38082016603773
Q96S19	C16orf13; METTL26	-0.211789962365031	3.33439322912796	-1.59294217497957	0.17681799070658	0.822903519863698	-4.38118199137804
P54105	CLNS1A	-0.135731989418295	3.31434363741946	-2.0055313852731	0.105901790829715	0.822903519863698	-4.38133359525658
Q13573	SNW1	0.125326358827442	3.33355007329846	2.02425198195561	0.103495321685246	0.822903519863698	-4.3813524664147
Q8N5C8	TAB3	0.199268540569301	3.29120956420947	1.60087381021882	0.175073807409436	0.822903519863698	-4.38142764590457
Q9NR33	POLE4	0.297024307670644	3.2833860512785	1.60113117546123	0.175017501856635	0.822903519863698	-4.38171092159156
Q86Y79	PTRH1	-0.230027965688481	3.30933343542393	-1.60536342395511	0.174094183354802	0.822903519863698	-4.38180745150203
P51812	RPS6KA3	0.107555685729689	3.32097763241008	2.12591631474933	0.0914059729101844	0.822903519863698	-4.38194026308508
Q9UI43	FTSJ2; MRM2	-0.164900421831943	3.29114742542071	-1.59635388105172	0.176065626740476	0.822903519863698	-4.38231033113247
Q8IV48	ERI1	-0.12038376327287	3.34263275038569	-1.71899812026248	0.151059184624811	0.822903519863698	-4.38233478072124
Q9H840	GEMIN7	-0.859190105354928	3.34977186281479	-2.06153845772245	0.0988739492452451	0.822903519863698	-4.38255850740868
Q6ZRP7	QSOX2	0.116243776983257	3.30673662074033	1.8592926228121	0.126861875986256	0.822903519863698	-4.38316453721757
Q9H6Q4	NARFL	-0.235282452373123	3.3246862535191	-1.72209958614688	0.15047586344941	0.822903519863698	-4.38341416744273
Q96FX7	TRMT61A	-0.189908672037743	3.33255946363144	-1.64295085854259	0.166105822972563	0.822903519863698	-4.38439138548991
Q99567	NUP88	0.134438884019562	3.32460657276932	1.93165582126102	0.115992501928565	0.822903519863698	-4.38440796448472
Q9UBV8	PEF1	-0.232801169230749	3.34518651296027	-1.62148143735459	0.170622376712471	0.822903519863698	-4.38459349673775
Q9Y4U1	MMACHC	-0.224919346468085	3.32932729211872	-1.62501845446665	0.169869865703481	0.822903519863698	-4.38472036371442
P19784	CSNK2A2	0.1525633741246	3.28990626099877	1.83389060380897	0.130925463564954	0.822903519863698	-4.38487403814188
Q562F6	SGOL2; SGO2	-0.125855293447045	3.29650629461907	-1.6517180039869	0.164296329398968	0.822903519863698	-4.38491136463179
Q3SXY8	ARL13B	0.171652515383192	3.29682987656157	1.5868633525221	0.178166499343	0.822903519863698	-4.38520078045743
P61221	ABCE1	0.0753332492209502	3.32603294439291	2.08194699205348	0.0964381602560797	0.822903519863698	-4.38538935407499
O43763	TLX2	-0.142611708835192	3.3073452281524	-1.58597017402791	0.178365504151483	0.822903519863698	-4.38566145700228
P55145	MANF	0.0974260013131745	3.33062309002009	1.75629766089388	0.144194848250204	0.822903519863698	-4.3870270605462
Q3KNV8-2	PCGF3	-0.137534681161737	3.3116882271329	-1.5866595337575	0.178211891670316	0.822903519863698	-4.38766992865479
Q9GZX9	TWSG1	0.15536484427316	3.30915059366483	1.58356288996888	0.178902966387342	0.822903519863698	-4.38776680429888
Q96ST2	IWS1	0.0962412567526235	3.3346350652071	1.86534807059389	0.125912721734433	0.822903519863698	-4.38826217035455
Q96D53-1	ADCK4; COQ8B	-0.108719967807756	3.27788959603111	-1.70391286565412	0.153929527141123	0.822903519863698	-4.38834806708861
Q9BXW9-1	FANCD2	0.100096486046371	3.31028630196089	2.00125283679156	0.106460082507738	0.822903519863698	-4.38993130574926
Q8N6C5-4	IGSF1	0.19791491354977	3.27181646904785	1.60165240368148	0.17490352478907	0.822903519863698	-4.39051632465517
Q8WXB1-1	METTL21A	0.265300542380069	3.31445194562664	1.58573337491843	0.178418301470907	0.822903519863698	-4.39056838503803
Q6ZQX7-4	C17orf97	0.202198717673061	3.31291686836324	1.69507912323292	0.155636136697113	0.822903519863698	-4.39232271507307
Q01469	FABP5	0.176678544097811	3.31236177719533	1.5930030193745	0.176804544898682	0.822903519863698	-4.39236501451714
Q96HH4	TMEM169	0.218849136349139	3.2971351160548	1.58481324125166	0.178623605059843	0.822903519863698	-4.39252685877766
Q9H079	KATNBL1	0.194489448758295	3.30862165755096	1.57691164331769	0.180396380000978	0.822903519863698	-4.39291163042608
Q16706	MAN2A1	0.108678176185829	3.30675591937569	1.63133657579959	0.16853397070435	0.822903519863698	-4.39335404548896
Q9Y2Y6	TMEM98	0.166723390996086	3.3334424301521	1.58504901593566	0.178570975665316	0.822903519863698	-4.39340822407064
O00222	GRM8	-0.246500269413378	3.37318480619346	-1.64841567309234	0.164975563398313	0.822903519863698	-4.39366345932363
P30419	NMT1	0.179543907236106	3.29551109074081	1.9286196479846	0.116428330160148	0.822903519863698	-4.39378211645634
Q5EBL8-2	PDZD11	-0.216842218766303	3.30737524431443	-1.57382628221817	0.181093358223151	0.822903519863698	-4.39417130731882
Q9NYB0	TERF2IP	0.0892735366916563	3.32693931231332	1.86861102228221	0.125404349704547	0.822903519863698	-4.39445781891352
Q9BW27	NUP85	0.0985680032180933	3.29960123514059	1.92140051990784	0.117471533236983	0.822903519863698	-4.39455253379644
Q01658	DR1	0.172324730215317	3.3339549203829	1.58733636290542	0.178061200077382	0.822903519863698	-4.39519250678689
Q09019	DMWD	-0.141185371985778	3.35746291512664	-1.58273038402627	0.179089212103422	0.822903519863698	-4.39525523610434
Q9H9B4	SFXN1	-0.119759266655891	3.30007315634675	-1.81573260744066	0.133913002642712	0.822903519863698	-4.39553646366465
Q96A26	FAM162A	-0.17144876726954	3.33898291016861	-1.6032608772921	0.174552268430294	0.822903519863698	-4.39558518763814
Q9Y3B7-1	MRPL11	-0.0990624773942579	3.29579034922743	-1.82911217318733	0.131704886947179	0.822903519863698	-4.39610184071254
P68400	CSNK2A1	0.0853869431703852	3.31773540118107	1.96937755467151	0.11071884026439	0.822903519863698	-4.39616498756682
Q9NS91	RAD18	0.113712342896616	3.31927120746928	1.80660452036377	0.135441473098496	0.822903519863698	-4.39663273911409
Q9NVA1	UQCC; UQCC1	0.212765883996418	3.2403682881862	1.57876820936304	0.179978275022179	0.822903519863698	-4.39714085237742
O00170	AIP	-0.116242206053898	3.32518444148099	-1.75525327474185	0.14438262617877	0.822903519863698	-4.39767691632297
Q8NDX6	ZNF740	-0.158700793070716	3.34521585697818	-1.57061666801594	0.181821254735656	0.822903519863698	-4.39785276033298
Q9Y333	LSM2	-0.297491386522402	3.37555304348299	-1.58169055097994	0.179322112448116	0.822903519863698	-4.39840174480904
Q13416	ORC2	0.119570395815482	3.32353632043457	1.84817902695364	0.128623325617143	0.822903519863698	-4.39863123111952
Q8WUX9	CHMP7	0.171829392949276	3.31746731576829	1.76847966742751	0.142023018660993	0.822903519863698	-4.39916070875033
P51512-1	MMP16	0.112497052024901	3.28513833470099	1.62365947420854	0.170158596974127	0.822903519863698	-4.39919097619444
Q3KRA6	C2orf76	-0.483425962621814	3.3363863165167	-1.6936460932796	0.155914798643359	0.822903519863698	-4.39959086871067
Q9NXR8-1	ING3	0.138861142661694	3.27562415440524	1.60052818598468	0.175149450545259	0.822903519863698	-4.39980471494739
Q86SZ2	TRAPPC6B	-0.172957054084521	3.33795371904583	-1.63942656455544	0.166838878766507	0.822903519863698	-4.40011428729023
Q5T7V8	GORAB	0.214269519626904	3.27939968252944	1.57402523983323	0.181048333110249	0.822903519863698	-4.40038370172225
Q6UB99	ANKRD11	0.0963184918922639	3.33560661867833	2.06471948350341	0.0984900038757954	0.822903519863698	-4.40046690898752
Q9UII2-1	ATPIF1	0.305689290914963	3.28801079623807	1.57327299696625	0.181218628177224	0.822903519863698	-4.40067603907175
Q9H2Z4	NKX2-4	-0.216605312327459	3.30697926929399	-1.57880495000681	0.179970010670363	0.822903519863698	-4.40068506076958
O60563	CCNT1	0.089528319811302	3.27868375042235	1.79835442983469	0.136838469829638	0.822903519863698	-4.40076008870609
Q9NPF4	OSGEP	0.115437718394088	3.30590724973138	1.69954850403885	0.15477029071228	0.822903519863698	-4.40080870796518
Q6ZMK1	CYHR1	-0.204825386273869	3.30972403862323	-1.56837060247926	0.182332365130877	0.822903519863698	-4.4008263523901
P32321-2	DCTD	-0.231160661728331	3.33792704815318	-1.61332648041764	0.172370167975072	0.822903519863698	-4.40115970352726
Q9UMX1	SUFU	-0.184644794401504	3.31991730289256	-1.56028223624846	0.184184819642111	0.822903519863698	-4.40188355966628
Q9UKA9-4	PTBP2	-0.123280916313548	3.34689966460566	-1.70785739350849	0.153173649253459	0.822903519863698	-4.40215428483602
P56545-2	CTBP2	-0.129962216416086	3.33418107057619	-1.69510668294386	0.155630782506672	0.822903519863698	-4.40284898735795
Q5TEA3	C20orf194	-0.184839655353764	3.35202020006767	-1.56648346504227	0.182762904808789	0.822903519863698	-4.40286587232015
Q96FF9	CDCA5	0.218388400242605	3.28985325815536	1.61803726608938	0.171358356761257	0.822903519863698	-4.40356143532315
Q96HY7	DHTKD1	-0.0860336733743893	3.29868994629449	-1.85320243819047	0.127824004169531	0.822903519863698	-4.40365105680567
Q9P2W9	STX18	-0.13430383923202	3.31359638972671	-1.62556440529698	0.169754010939648	0.822903519863698	-4.40373606354147
Q8N6N3	C1orf52	0.164351640539432	3.27003956258882	1.55502622123201	0.185398613020164	0.822903519863698	-4.40435370035179
Q9UL12	SARDH	-0.29086307155249	3.30535843436161	-1.71434977217018	0.151937773670705	0.822903519863698	-4.40469969698702
Q96JG6	CCDC132; VPS50	0.0665556452638459	3.31306770554574	1.90688827104062	0.119598463366911	0.822903519863698	-4.40472583779519
O94874-1	UFL1	0.180935712379097	3.32205706030721	1.99919783502602	0.106729341291323	0.822903519863698	-4.40569915938387
Q9NWK9	ZNHIT6	0.159889904130275	3.30552402901086	1.8705604488172	0.125101649701009	0.822903519863698	-4.40594398822011
Q9NXW9-1	ALKBH4	-0.232851381618876	3.35679745822275	-1.55652395165163	0.185051928134537	0.822903519863698	-4.40606587467316
O75663	TIPRL	0.150334937677823	3.3130340680366	1.81904596663414	0.133362623365997	0.822903519863698	-4.40651516047754
P61026	RAB10	0.197773020900346	3.31339562796961	1.69685790161387	0.155290947168419	0.822903519863698	-4.40661865183393
Q2NKX8	ERCC6L	0.11035350977041	3.31710763710881	1.90962675402284	0.119194034621876	0.822903519863698	-4.406848134927
Q99614	TTC1	0.12743114859678	3.31574249764319	1.80202795344975	0.13621459542493	0.822903519863698	-4.40686340852091
O15162	PLSCR1	0.204469265408718	3.25106677719042	1.56684506809948	0.182680328783821	0.822903519863698	-4.40703584412651
Q96E35	ZMYND19	-0.366723103156674	3.35054083757621	-1.82333984075295	0.132652860574453	0.822903519863698	-4.40726481110564
Q9P016	THYN1	-0.184190514557899	3.34843829958259	-1.76345932234478	0.142913947724468	0.822903519863698	-4.40729745751346
O14933	UBE2L6	-0.727482309032091	3.35436049547632	-1.83927315346704	0.13005323997666	0.822903519863698	-4.4073767200005
Q9BYD1	MRPL13	-0.164259895840641	3.27108963406788	-1.56725497276967	0.182586767485991	0.822903519863698	-4.40742970854233
P36957	DLST	-0.125949956570874	3.27276320587484	-1.711062174044	0.152562316325564	0.822903519863698	-4.40837213621489
O60701	UGDH	-0.219747952722963	3.33068466659305	-1.94094555485257	0.114669638965711	0.822903519863698	-4.40856952783921
O94921-1	CDK14	0.175045827241432	3.27894419699345	1.62077844341825	0.170772339839784	0.822903519863698	-4.40873651162803
P13796	LCP1	0.0968038874337058	3.30050079010812	1.73778499692895	0.147560880133824	0.822903519863698	-4.40885204972231
O94900	TOX	0.268165252854345	3.25684286677058	1.550948817738	0.18634569659839	0.822903519863698	-4.40925332426186
Q8IY47	KBTBD2	0.14051425819323	3.32460625979424	1.61811455297932	0.171341806476146	0.822903519863698	-4.40959223907445
Q8WVE0	N6AMT2; EEF1AKMT1	-0.203769453015199	3.32988653615352	-1.54514240442212	0.187702682982507	0.822903519863698	-4.41050018632296
Q9HAW4	CLSPN	0.11454224939156	3.31119075750546	1.94152856306151	0.114587149983211	0.822903519863698	-4.41073599176968
Q8NHP8	PLBD2	0.0941036090807853	3.31904652362556	1.65424340105156	0.163778806184571	0.822903519863698	-4.41083042975085
P09488	GSTM1	0.206447078676075	3.26068706285581	1.562752900792	0.183616992421543	0.822903519863698	-4.41151799575992
Q9UHB7-1	AFF4	0.0845757340595746	3.31084749688007	1.83735669419874	0.130363100816414	0.822903519863698	-4.41167301281359
O95260-2	ATE1	0.284964578306747	3.28582313623067	1.54740413284736	0.187172944456718	0.822903519863698	-4.41184240611778
Q8WUZ0-2	BCL7C	0.144567338456628	3.31827924258817	1.5424268028235	0.188340691552563	0.822903519863698	-4.41195239150691
P52943	CRIP2	0.122273959640087	3.3348273123039	1.58376659473238	0.178857423644468	0.822903519863698	-4.41199710420312
Q96H35	RBM18	-0.152242184331283	3.34841800906815	-1.69512267588621	0.155627675547798	0.822903519863698	-4.41203943324577
Q2TAL8	QRICH1	0.122003716431704	3.2921823035956	1.73577103006037	0.1479318965618	0.822903519863698	-4.41212716226959
Q8TDQ7	GNPDA2	-0.121548861052626	3.33287876129465	-1.57068095872892	0.181806645899428	0.822903519863698	-4.41223940341797
P19447	ERCC3	0.126516554115045	3.31008333035852	1.76956769654637	0.141830688209795	0.822903519863698	-4.4126913990572
Q13491-4	GPM6B	-0.326304792259628	3.29475136850164	-1.69147551434922	0.156337849553661	0.822903519863698	-4.41293364101952
P62699	YPEL5	-0.33936290500535	3.37244582541486	-1.55866323580077	0.184557857758771	0.822903519863698	-4.41383406605917
Q9UP83-2	COG5	0.12236754416704	3.31511709691699	1.80022956836399	0.136519646574072	0.822903519863698	-4.41394965991461
Q6P2D0-1	ZFP1	-0.140620311320178	3.35616274819128	-1.53863619375856	0.189234859851587	0.822903519863698	-4.41441758468439
P09017	HOXC4	-0.157796018828282	3.33504786932559	-1.54406688524216	0.187955110812783	0.822903519863698	-4.41450266562408
Q8NFV4	ABHD11	-0.16810435806244	3.27521786348854	-1.54015751053916	0.188875491663106	0.822903519863698	-4.41473628159513
Q99584	S100A13	0.144606293177275	3.33442568493923	1.58386403421067	0.178835642971385	0.822903519863698	-4.41507841646855
Q6ICB0	DESI1	-0.883646739985464	3.39138517458962	-1.72926249402314	0.14913745966942	0.822903519863698	-4.41510128404707
P01034	CST3	-0.295616045639776	3.32285442911316	-1.65402803748312	0.163822875712437	0.822903519863698	-4.41525213228997
Q8N944	AMER3; FAM123C	0.13460077748663	3.31368296045805	1.54019472766444	0.188866708643933	0.822903519863698	-4.41544808047088
P04844-1	RPN2	-0.109429755817108	3.31413148758919	-1.73387557581214	0.148281953779523	0.822903519863698	-4.41548679852941
Q96NT0	CCDC115	-0.44397264802377	3.35546238103293	-1.66771238621613	0.161046379445664	0.822903519863698	-4.41575530889228
P48163	ME1	-0.245984430382698	3.3239950892986	-1.57048003827709	0.181852305118384	0.822903519863698	-4.41580799945582
O43913	ORC5	0.114260526938104	3.32806080102236	1.78415409598728	0.139278027802613	0.822903519863698	-4.41607449892354
Q53GQ0	HSD17B12	0.334056171713202	3.30264243363459	1.70428546704335	0.153857964219484	0.822903519863698	-4.41741445227283
Q9P281	BAHCC1	0.168282121114008	3.28626566453476	1.54327558799593	0.18814104572724	0.822903519863698	-4.41743810015886
Q9UPW0-1	FOXJ3	0.171569853343409	3.31585518024115	1.57994404090413	0.179713974149522	0.822903519863698	-4.41755866230804
Q8N7B6	PACRGL	-0.240165572027547	3.3374519346556	-1.53384885515459	0.19037015709971	0.822903519863698	-4.41769762493264
P19623	SRM	-0.140561928269058	3.32723269405922	-1.72959646847099	0.149075353996192	0.822903519863698	-4.41779796461253
P10253	GAA	0.0836791759432943	3.31767013069728	1.75529690168077	0.144374777139133	0.822903519863698	-4.41800643793742
Q7Z2E3-1	APTX	-0.129039284244206	3.34852822346829	-1.71164873615421	0.152450695700619	0.822903519863698	-4.41811587649439
Q92932-3	PTPRN2	-0.208405661610025	3.32374213083692	-1.53286825234204	0.190603533425486	0.822903519863698	-4.4182068784945
P42771-1	CDKN2A	-0.189332499293598	3.30910203333247	-1.56093872568583	0.184033769972766	0.822903519863698	-4.41861015846766
Q92610	ZNF592	0.0928931327348697	3.29202557776586	1.6912977994001	0.156372538321854	0.822903519863698	-4.41869658300758
Q9BUB5-1	MKNK1	-0.101667592031821	3.32320003115039	-1.60362265949354	0.17447336038045	0.822903519863698	-4.41944861856689
Q8N428	GALNT16; GALNTL1	0.121072828813564	3.30715515707239	1.64029986972242	0.166656926888751	0.822903519863698	-4.41945128414629
Q9NTX5	ECHDC1	-0.343742250298145	3.34546993034294	-1.62683407273455	0.169484885702956	0.822903519863698	-4.42095105316444
O43598-1	C6orf108; DNPH1	-0.19681974408242	3.29801398395967	-1.5384621285747	0.189276020997407	0.822903519863698	-4.42102286499811
P35232	PHB	-0.09576624994247	3.32301098497858	-1.83708311384981	0.130407396973469	0.822903519863698	-4.42239668522521
O43809	NUDT21	-0.22218277974632	3.38699857352224	-1.5711524054324	0.181699554378396	0.822903519863698	-4.42266321689046
Q9NVW2	RLIM	0.262301975873693	3.29439517470846	1.54420660967187	0.187922298022409	0.822903519863698	-4.42322858643657
Q12962	TAF10	-0.151460267722545	3.31671952236392	-1.52945436694561	0.191418222998281	0.822903519863698	-4.42397343424121
Q96ST3	SIN3A	0.139284973458545	3.3261270312969	2.08685948311508	0.0958614817836035	0.822903519863698	-4.42543317478016
P49454	CENPF	0.114719345442936	3.33185595660973	2.51307364736363	0.057610837525408	0.822903519863698	-4.42556407425096
Q86TS9-1	MRPL52	-0.297414358968373	3.32129276835491	-1.58105262877359	0.179465143045681	0.822903519863698	-4.42584060782235
Q92785	DPF2	0.0751523515936691	3.33410835171144	1.74463203711964	0.146306628050816	0.822903519863698	-4.42631255434778
Q7LDG7-2	RASGRP2	0.200524302109455	3.27820585927981	1.52314000664032	0.192934162738097	0.822903519863698	-4.42639932968881
Q17RN3-1	FAM98C	-0.208401880308624	3.28293553069722	-1.54398817671327	0.187973597171576	0.822903519863698	-4.42659215325231
Q9NX31	C20orf111; OSER1	-0.16591067126377	3.28995206050689	-1.52452880244885	0.192599729137156	0.822903519863698	-4.42673114651163
Q9NX40	OCIAD1	0.230450137541448	3.22825685337581	1.60707853404494	0.17372140275592	0.822903519863698	-4.42721573721407
Q9H7L9	SUDS3	0.142191394182904	3.32630711677635	1.60854207362325	0.17340393453481	0.822903519863698	-4.42738812190398
Q9Y4K4	MAP4K5	0.151177116873136	3.31276452469118	1.88518313809049	0.122855294840528	0.822903519863698	-4.42757378590398
O95340-2	PAPSS2	-0.236398743469583	3.29605524950624	-1.54079334680141	0.188725493690724	0.822903519863698	-4.42804941997267
Q96LX8	ZNF597	0.119966660556044	3.29600311810906	1.5452927502556	0.187667423121412	0.822903519863698	-4.42828324878382
P40337	VHL	-0.231023631410329	3.32041714028008	-1.51384169443528	0.195188083745031	0.822903519863698	-4.42882025439003
P34059	GALNS	-0.275887954355388	3.33825442763562	-1.54169496523458	0.188512998284507	0.822903519863698	-4.4289267941757
Q9BZ23	PANK2	0.0924777902452165	3.31269887677352	1.69603684632726	0.155450184055525	0.822903519863698	-4.42902610551086
O15254	ACOX3	0.134569983314486	3.31708986061464	1.51848225780763	0.194059978207162	0.822903519863698	-4.42925146734816
Q9Y6X9-1	MORC2	0.113218904608198	3.32533071408534	2.03705026793736	0.101883652641307	0.822903519863698	-4.42948939575856
Q9NWS0-1	PIH1D1	-0.22794357905644	3.32869806636532	-1.56578966741476	0.182921445193391	0.822903519863698	-4.42988167120199
Q9H300	PARL	-0.116689027867033	3.28478040289371	-1.55914184785269	0.184447501351522	0.822903519863698	-4.43028717017975
Q9NQR1-2	SETD8; KMT5A	-0.13646904972932	3.31575840417866	-1.51508429293131	0.194885379905749	0.822903519863698	-4.43046457361221
Q9BZK7	TBL1XR1	-0.110871092147781	3.33889679309463	-1.88479234853468	0.1229147765414	0.822903519863698	-4.43062423701104
Q14919-2	DRAP1	0.105650739016983	3.30891856074529	1.64606157018718	0.165461494843502	0.822903519863698	-4.43083390427363
Q7Z3B3	KANSL1	0.0928420051502012	3.30314398118913	1.81130522165463	0.134652110166416	0.822903519863698	-4.43089752514654
Q96AZ6-1	ISG20	-0.209745512483442	3.33406996564678	-1.50885610786624	0.196407264959606	0.822903519863698	-4.43149774785155
Q92733	PRCC	0.131418567111833	3.3106236152769	1.75986315380087	0.143555671681653	0.822903519863698	-4.43173785845214
Q15131-1	CDK10	0.10895954587936	3.28760349343707	1.54899751438551	0.186800635900176	0.822903519863698	-4.43229666323711
Q92552-2	MRPS27	-0.081087205186813	3.27649249285798	-1.79616194874723	0.137212226630789	0.822903519863698	-4.43244906608434
Q9NNW7-1	TXNRD2	-0.10454874390198	3.29828192595067	-1.6128382453711	0.172475376753589	0.822903519863698	-4.43282678331122
P60983	GMFB	-0.133886584719263	3.33986338567744	-1.53801409835381	0.189382007367655	0.822903519863698	-4.43288482944574
Q9BU76-1	C1orf35	0.108778970933098	3.31014024384807	1.63941040108239	0.166842248291634	0.822903519863698	-4.43308670056296
P17152	TMEM11	0.14479652732187	3.32919102368407	1.52323541485605	0.192911169312311	0.822903519863698	-4.43313367283792
P17480-1	UBTF	0.0595885869851719	3.30786884555575	2.22197872387712	0.0813681791965126	0.822903519863698	-4.43398730477813
Q15172-1	PPP2R5A	0.152987882986946	3.30802928023424	1.55723850718815	0.18488675456545	0.822903519863698	-4.43501139364293
O00232-1	PSMD12	0.105323513851397	3.30291001026221	1.98110434751629	0.109131454459299	0.822903519863698	-4.43505225002918
Q13347	EIF3I	-0.52572420680743	3.32734799268497	-2.02862241164698	0.102941930428294	0.822903519863698	-4.43558008528483
Q5T200-1	ZC3H13	0.11157245278684	3.31473055298883	1.88882074781327	0.122303060966237	0.822903519863698	-4.43595560043924
Q8N201	INTS1	0.0835917381035931	3.32088833432758	2.07485992920257	0.097276661421372	0.822903519863698	-4.4365413325727
P24666-1	ACP1	-0.153914173008854	3.33081370448547	-1.603010559505	0.174606886000687	0.822903519863698	-4.43758758051723
Q15776	ZKSCAN8; ZNF192	-0.102282558975294	3.28885933095286	-1.5745155013351	0.180937432098223	0.822903519863698	-4.43772825520114
Q13530	SERINC3	0.181647468014136	3.30918729305286	1.49868246501961	0.198918436650438	0.822903519863698	-4.4380456108254
Q86UY6	NAA40	0.1979514303468	3.30496513962776	1.60834613541492	0.173446403301964	0.822903519863698	-4.43856334319639
Q5U5X0	LYRM7	0.368852491659789	3.21803080587308	1.49789763865527	0.199113462337597	0.822903519863698	-4.43864919343503
P62942	FKBP1A	-0.286323003793329	3.3196956918904	-1.7166112519887	0.151509678644488	0.822903519863698	-4.43908960442044
O43909	EXTL3	0.126170320368702	3.31417737029276	1.75569077738107	0.1443039337582	0.822903519863698	-4.43926119313206
Q8IWJ2	GCC2	0.103657149206944	3.32249256178494	2.23420039112455	0.0801791193463417	0.822903519863698	-4.43942960154259
Q9BUI4	POLR3C; LOC101060460	0.0879763045304947	3.30707091675292	1.73862946951283	0.147405593934875	0.822903519863698	-4.43951862079812
Q86VM9	ZC3H18	0.0867616791297111	3.31591320110544	1.93528412207383	0.115473927563006	0.822903519863698	-4.44036166717526
Q8WXA9-2	SREK1	0.0697400134873467	3.32014293535852	1.83883735762564	0.130123633844612	0.822903519863698	-4.44071705587291
P47756-2	CAPZB	-0.0798507065572269	3.33091595741661	-2.04982744655208	0.100301278353358	0.822903519863698	-4.44113808451116
Q8IWT0	ZBTB8OS	-0.315947570027708	3.30350147365795	-1.49347907821515	0.200214963455005	0.822903519863698	-4.44115820237072
Q9ULL5-3	PRR12	0.125995750874883	3.31568417919798	1.70032136309925	0.154621064464339	0.822903519863698	-4.44125475063067
Q8NBT0	POC1A	-0.160380137587348	3.33752686015765	-1.49226198188524	0.200519422124008	0.822903519863698	-4.44158546990418
O43264	ZW10	0.154138525156091	3.30702761208313	1.9017344505527	0.120363507003293	0.822903519863698	-4.44169332454199
Q9NX14-2	NDUFB11	-0.14043155683269	3.28691901532291	-1.62388566976569	0.170110504840587	0.822903519863698	-4.44173506254833
Q9NWB1-2	RBFOX1	-0.270787153760267	3.32180673487449	-1.54372445591732	0.188035550705219	0.822903519863698	-4.44175875083084
Q99766-1	ATP5S	-0.164068618203062	3.2801488769059	-1.48950437517506	0.201210923306308	0.822903519863698	-4.44215014621867
Q13387-1	MAPK8IP2	-0.18193449717587	3.35589543515212	-1.50231272758728	0.198018772735299	0.822903519863698	-4.44218278380773
P23443-1	RPS6KB1	0.182413963669282	3.30304940769615	1.54051381645793	0.188791422200677	0.822903519863698	-4.44287167352246
Q8WTW3	COG1	0.101768016916895	3.31969284695401	1.89798820967865	0.120922826573435	0.822903519863698	-4.44389273345338
Q8N5W9	FAM101B; RFLNB	-0.259498466653993	3.29398405695569	-1.48843075569981	0.20148077757256	0.822903519863698	-4.44457340785672
Q03933-2	HSF2	0.0916313044637454	3.34121899126186	1.60185762579709	0.174858669247646	0.822903519863698	-4.44502738433413
P35080-1	PFN2	-0.194861769596927	3.32036387004742	-1.93914483878674	0.114924814932234	0.822903519863698	-4.44519380280832
Q9H7B4-1	SMYD3	0.164170913047664	3.30802030332262	1.71263425060525	0.152263343628092	0.822903519863698	-4.44519588918618
Q9H920	RNF121	0.142308274408988	3.33022382112389	1.49126103206639	0.200770151741105	0.822903519863698	-4.44528622901428
O43602-2	DCX	-0.0874456585929622	3.32878949788205	-1.67442863217509	0.159701176896678	0.822903519863698	-4.44560636038487
P52657	GTF2A2	0.245088885735243	3.28040331149137	1.4921777341416	0.200540513639422	0.822903519863698	-4.44662217174308
Q9NRX1	PNO1	0.116769813784199	3.31659043081726	1.64745275758413	0.165174152886645	0.822903519863698	-4.44691123433292
Q9H944	MED20	-0.148571476202977	3.33838759766209	-1.53649927742661	0.189740790006149	0.822903519863698	-4.44742950181595
P23142	FBLN1	0.109734190817261	3.32167526544905	1.69024566979665	0.156578067509566	0.822903519863698	-4.44760832647324
P08579	SNRPB2	0.114556513929703	3.33965993909995	1.63804847117598	0.167126410346867	0.822903519863698	-4.44781238670458
Q14651	PLS1	0.103215538213019	3.3029782313435	1.6016916753151	0.174894940268367	0.822903519863698	-4.44839255838315
P29373	CRABP2	-0.184605252798836	3.36785730836384	-1.47882994394169	0.203909757780977	0.822903519863698	-4.44842218170824
Q4G0T1-3		-0.185942133455332	3.38474149155151	-1.48038233390174	0.203515073189916	0.822903519863698	-4.44876167710544
Q9P258	RCC2	-0.209836424265126	3.32410394523341	-2.24393943028429	0.0792450950554639	0.822903519863698	-4.44901650336714
P10746	UROS	-0.160820985408351	3.34051415255555	-1.5327384421811	0.190634448505479	0.822903519863698	-4.44932266525932
Q9H869-9	YY1AP1	-0.210094763587257	3.34196559997156	-1.50954926320646	0.196237312118098	0.822903519863698	-4.44935550836805
P42126	ECI1	-0.107478345701804	3.29619945467347	-1.64951058492814	0.164750044448314	0.822903519863698	-4.44944498226185
Q9BWT1-2	CDCA7	-0.12195527169127	3.40383980000385	-1.5083747583308	0.196525370968253	0.822903519863698	-4.4497676838386
Q9H1H9-4	KIF13A	-0.126178211026479	3.31100387735954	-1.76878686854627	0.141968687646868	0.822903519863698	-4.45001629299026
O14795-2	UNC13B	0.100776968934385	3.29758445631099	1.96683566204704	0.111066130082012	0.822903519863698	-4.45005989726281
Q01831	XPC	-0.125164670344069	3.26774799849392	-1.58695332003539	0.178146466421036	0.822903519863698	-4.45195655358621
Q9BZL1	UBL5	-0.250180281919531	3.34407622253332	-1.48425583839513	0.202533518732337	0.822903519863698	-4.45201596996621
Q8N0X7	SPG20; SPART	0.0722525312764281	3.33151559280924	1.87324720892662	0.124685709380656	0.822903519863698	-4.45230596414515
Q9Y2Z4	YARS2	-0.171416410057537	3.34442479236038	-1.55833485675554	0.184633612026445	0.822903519863698	-4.45251341112298
Q8WVL7	ANKRD49	-0.33427473684996	3.28548347307362	-1.67123271291929	0.160339862858596	0.822903519863698	-4.45320647498752
O95948	ONECUT2	-0.233467287487015	3.33002082983073	-1.48627456369112	0.202023808587003	0.822903519863698	-4.45331602844528
P36404	ARL2	-0.168168307946666	3.38899834328253	-1.53550481125308	0.189976693366833	0.822903519863698	-4.4537252400444
O15315-3	RAD51B	-0.21202610960283	3.31125920641962	-1.47270671493806	0.205473859688166	0.822903519863698	-4.45388601446776
Q8TB36	GDAP1	0.288772662377844	3.27650542407928	1.62153544117973	0.170610862061134	0.822903519863698	-4.45428267001827
Q96JM3	CHAMP1	0.0947163834576908	3.3218659797958	2.03986092452967	0.101533302089605	0.822903519863698	-4.45480504769186
Q9NUQ9	FAM49B	0.108017245086163	3.29859312843507	1.77516157657834	0.140846088422789	0.822903519863698	-4.45557207061442
Q15628	TRADD	-0.390559467744203	3.30446840980439	-1.61126240107858	0.172815392433935	0.822903519863698	-4.45585627694264
Q9UKY4-1	POMT2	-0.684152462638394	3.28516400638654	-1.51652989814225	0.194533804819839	0.822903519863698	-4.4559092718973
Q96S99	PLEKHF1	-0.353141732225013	3.25021997888876	-1.47452924664862	0.205007095013325	0.822903519863698	-4.4566964083271
Q5T1V6	DDX59	0.111656820829268	3.3081149615922	1.68189172913202	0.158219759404089	0.822903519863698	-4.4567903307488
P24928	POLR2A	0.0914609315922866	3.37157640391967	2.27243138208624	0.0765798018378582	0.822903519863698	-4.45697877659238
Q86Y39-2	NDUFA11	-0.173908731516991	3.26799219735952	-1.46443526154902	0.207605319932888	0.822903519863698	-4.45706076264505
P23193	TCEA1	0.135923822767208	3.32119799955986	1.9364945826138	0.115301466120771	0.822903519863698	-4.4574744784067
Q96PN7	TRERF1	0.119641578397002	3.30580124950581	1.54899825655724	0.186800462656128	0.822903519863698	-4.45778332759821
Q9Y376	CAB39	0.138133334537628	3.31497442663303	1.86693911842437	0.125664566215508	0.822903519863698	-4.45797772914602
O75165	DNAJC13	0.096050157517503	3.31163863621708	2.072690012181	0.0975349501035475	0.822903519863698	-4.45807229253781
Q96EL3	MRPL53	-0.114889267986201	3.3050298802644	-1.53774384279685	0.189445967644665	0.822903519863698	-4.45830459579712
Q9BYG0	B3GNT5	-0.561231812005037	3.46155646283251	-1.88496594892593	0.122888349274323	0.822903519863698	-4.45886860266957
Q99594	TEAD3	0.183388621285498	3.31166219684668	1.57141607533416	0.181639687832786	0.822903519863698	-4.45896697691803
Q8WVZ9	KBTBD7	0.105129332630266	3.32328186495651	1.59088212072069	0.177273839767513	0.822903519863698	-4.45948678026647
Q92947-1	GCDH	-0.130598908499297	3.2863123399618	-1.69037447622099	0.156552890943633	0.822903519863698	-4.45971034842544
Q9NZL9	MAT2B	-0.128992307246226	3.32864944597759	-1.68375003017195	0.157853064284624	0.822903519863698	-4.46003511243252
O75820-1	ZNF189	-0.123283121279248	3.29830078369065	-1.48531185794303	0.202266726264922	0.822903519863698	-4.46083765775238
Q99590-1	SCAF11	0.181701161406184	3.3144479373691	1.90249876347903	0.120249727433509	0.822903519863698	-4.46086767559637
Q969V6	MKL1	0.133392359960721	3.30137701683401	1.7240273386841	0.150114454756355	0.822903519863698	-4.46099959579239
Q5JPI3	C3orf38	0.146547306859825	3.31110558283695	1.48886751807392	0.201370954559492	0.822903519863698	-4.46137532890666
Q15572-1	TAF1C	0.0924298748006607	3.31953899024844	1.62589019220519	0.169684914467528	0.822903519863698	-4.46152059400126
Q8NBN7	RDH13	-0.196229912472593	3.28571472759132	-1.45486810834837	0.210097566442977	0.822903519863698	-4.46185926576655
P12277	CKB	-0.361897098172594	3.33981189206135	-2.12504142501639	0.0915033079653165	0.822903519863698	-4.46250494117483
Q86YL5-2	C8orf42; TDRP	-0.183006910003428	3.32049931302043	-1.45461378712338	0.210164213187505	0.822903519863698	-4.46275397145485
P11137-4	MAP2	0.172175099353448	3.27398725840938	1.45151574321471	0.210977731636669	0.822903519863698	-4.46314978739167
Q96SB8	SMC6	0.0905254494431021	3.31250466498417	2.04878092376196	0.100429893463973	0.822903519863698	-4.46358471326278
Q96EZ8	MCRS1	0.126759720186493	3.31618081585457	1.70936389192381	0.152885963954618	0.822903519863698	-4.46362498165893
Q9Y4B4	RAD54L2	0.0885662124330935	3.3013668639748	1.83575697562333	0.130622337627239	0.822903519863698	-4.46376444916319
Q9UKK6	NXT1	-0.148862175392777	3.34059555755809	-1.49252134641186	0.200454503591803	0.822903519863698	-4.46386147102757
O15182	CETN3	0.133602310395284	3.30406580129053	1.66465656705564	0.161662229938456	0.822903519863698	-4.46461105516922
Q13309-1	SKP2	0.123902506176949	3.31141628036446	1.66498860573225	0.161595197531212	0.822903519863698	-4.46499221593575
P51452	DUSP3	-0.22041685578998	3.34734855338752	-1.52326983903387	0.1929028737332	0.822903519863698	-4.465019782685
Q15084-2	PDIA6	-0.0785239389467331	3.34330265479244	-1.8246179598143	0.132442349827269	0.822903519863698	-4.46519693833924
Q5W0V3	FAM160B1	0.14660424065456	3.30487819118743	1.66247839315272	0.162102661772241	0.822903519863698	-4.46546512115935
Q9BT30	ALKBH7	-0.233187121982374	3.30455894807696	-1.49306129950943	0.200319420328964	0.822903519863698	-4.46564479457888
P29218-3	IMPA1	-0.0766393505809613	3.32867562427502	-1.7484008250819	0.145620928473787	0.822903519863698	-4.46605595875622
Q8WUX2	CHAC2	0.13345916915275	3.31528652670115	1.48387458151991	0.202629924016785	0.822903519863698	-4.46609276382217
P38432	COIL	0.105301957694316	3.3336276011204	1.74094409378523	0.146980826810878	0.822903519863698	-4.46614368230956
O75489	NDUFS3	-0.116187038912319	3.26874028000961	-1.60413443249722	0.174361799026675	0.822903519863698	-4.46663603142553
Q7RTV0	PHF5A	0.183923935382045	3.31649777897033	1.57834252522458	0.180074055007865	0.822903519863698	-4.46709696094589
O75334-1	PPFIA2	0.140568237629643	3.32688206411195	1.46067749015315	0.208580766514292	0.822903519863698	-4.46720841834654
Q3MIT2	PUS10	-0.13672916456905	3.3275890742669	-1.65625615979077	0.163367517742573	0.822903519863698	-4.46727966358841
Q9UL18	AGO1; EIF2C1	0.106375728700646	3.31338628898601	1.75576746330723	0.144290145009345	0.822903519863698	-4.46762891250742
Q7Z3K3-1	POGZ	0.0786667837089076	3.31076139706585	1.95964785086165	0.112054418921138	0.822903519863698	-4.46904211020193
Q9UJC3	HOOK1	0.0953668193845761	3.31448554364994	1.85666598609928	0.127275903133833	0.822903519863698	-4.46912500441822
Q9HCD5	NCOA5	0.144426070811531	3.30853709238964	1.83977865557519	0.129971636113575	0.822903519863698	-4.47012100262968
Q9UPV9	TRAK1	0.218087724308103	3.27708499052081	1.44315412217946	0.21318872872359	0.822903519863698	-4.47047570377935
O00221	NFKBIE	-0.163337646168842	3.33567636329782	-1.46594037892578	0.207215868730852	0.822903519863698	-4.47073942762166
Q04446	GBE1	0.142632448559589	3.31463549664278	1.73912275866743	0.14731496278564	0.822903519863698	-4.47100481641262
Q96T37-1	RBM15	0.105131439125556	3.3191740935489	1.92577773808231	0.116837834000742	0.822903519863698	-4.47183564855138
Q9BTC0	DIDO1	0.1158408493878	3.31837032683875	2.18737734567607	0.08483942134011	0.822903519863698	-4.47214017408616
Q86YA3-1	C4orf21; ZGRF1	0.098589457203008	3.3084606053309	1.69068132959869	0.156492929830277	0.822903519863698	-4.47254408790771
Q9BQG2	NUDT12	-0.133671290702368	3.33637326292452	-1.69819266818745	0.155032434791703	0.822903519863698	-4.47301265423754
P52789	HK2	0.168432388597605	3.33878226579336	2.03234250741539	0.102473366064032	0.822903519863698	-4.47332185987027
Q96P16-1	RPRD1A	-0.138094085821749	3.3200639127506	-1.62566721549366	0.169732202763763	0.822903519863698	-4.47388047209175
Q5VWJ9	SNX30	-0.105988452356717	3.33183879621516	-1.79130335135221	0.138044247767057	0.822903519863698	-4.47402928022786
Q8TCT0	CERK	0.148840766594798	3.27074200675989	1.43412625256851	0.215601144397898	0.822903519863698	-4.47477039007827
Q8NEY1	NAV1	0.0828443980692151	3.30012523331176	1.83362193542202	0.130969159391206	0.822903519863698	-4.47490443250219
O15400	STX7	0.137440738051118	3.33927573903177	1.46287849100341	0.208008887451365	0.822903519863698	-4.47491557414321
Q9H3G5	CPVL	0.137523319425792	3.30778863708782	1.49863653515762	0.198929844835254	0.822903519863698	-4.47546179456309
Q96DU7	ITPKC	-0.186483622555753	3.33321014392674	-1.42638622280747	0.217690463199933	0.822903519863698	-4.47546597804778
Q9NPQ8	RIC8A	0.105201949291531	3.30167005136049	1.68531950805815	0.157544035113919	0.822903519863698	-4.47580371609251
Q92845	KIFAP3	0.0952561719987094	3.30729087819653	1.70495257272409	0.15372992268832	0.822903519863698	-4.47583952236129
P49903-1	SEPHS1	-0.191535883602413	3.31625261246656	-1.68217864443592	0.158163086468111	0.822903519863698	-4.47636773660434
Q5T4D3-3	TMTC4	-0.110294588038856	3.28783885324388	-1.49360782984819	0.200182782563933	0.822903519863698	-4.47648521367303
Q8NCC3	PLA2G15	0.102041830575443	3.31489091565264	1.50664043184424	0.196951492826301	0.822903519863698	-4.47680865054185
Q9H7C9-1	AAMDC	-0.121360314245559	3.32437025141103	-1.52972771401395	0.191352864835261	0.822903519863698	-4.47697752037788
Q6TCH7-1	PAQR3	0.187129510397553	3.28540485424083	1.43813024007058	0.214527955280352	0.822903519863698	-4.4775322548648
Q9H6X2	ANTXR1	0.149257285043081	3.29283892133029	1.44100908568406	0.213759540336603	0.822903519863698	-4.47796082616994
Q0P6H9	TMEM62	0.189999090219772	3.30121497408033	1.42146950345694	0.219027822614115	0.822903519863698	-4.47803724635779
Q9HA92	RSAD1	-0.22350225866165	3.28616599408737	-1.45085704639255	0.211151093918149	0.822903519863698	-4.47830886750852
Q5SRE7-1	PHYHD1	-0.202106176359241	3.28677181973509	-1.43193178050625	0.2161915335196	0.822903519863698	-4.47844419697407
Q9Y2H1	STK38L	0.0964729315242581	3.30824761244283	1.67621036699332	0.15934622914922	0.822903519863698	-4.47850666579181
Q86W34-4	AMZ2	0.144323254573638	3.30339560065696	1.5325981633453	0.190667862340817	0.822903519863698	-4.47891527542676
P32929	CTH	-0.183311278778724	3.35940455676567	-1.55458348142342	0.185501219081618	0.822903519863698	-4.47919889478003
P53680	AP2S1	0.129707717769913	3.31681349133865	1.51089936425595	0.195906700183271	0.822903519863698	-4.48009794439249
P51587	BRCA2	0.126545858657851	3.30835735561187	2.08099195595428	0.0965507025785474	0.822903519863698	-4.4802171074755
O43513	MED7	0.183886454169639	3.30605135315124	1.41810220691842	0.219948310464875	0.823070406111797	-4.48025348266196
P22466	GAL	-0.429069146391183	3.29637124727558	-1.65793255357316	0.163025760184812	0.822903519863698	-4.48066986636866
Q14964	RAB39A	0.243205609077901	3.28782179368441	1.46595104561545	0.207213111254964	0.822903519863698	-4.48081108133566
Q8TAC1-2	RFESD	-0.241008389194873	3.28277656034328	-1.47512111076968	0.204855736994317	0.822903519863698	-4.48128317537247
Q8N4T8	CBR4	-0.202082903784298	3.27015719682119	-1.41534085373076	0.220705942143779	0.823070406111797	-4.48189189627092
Q15545	TAF7	0.0989071486681939	3.35110658708364	1.68743212007419	0.157129034283542	0.822903519863698	-4.48198314810007
Q53EZ4-1	CEP55	0.0893003273256777	3.32887960677861	1.69982544880599	0.154716800409468	0.822903519863698	-4.48251024606379
Q96PK6-5	RBM14-RBM4; RBM14	-0.194198160552292	3.31540768122487	-1.4248060053211	0.218119423176103	0.822903519863698	-4.48253923103717
P13056-1	NR2C1	0.123968496600141	3.30704223262388	1.59921262595267	0.175437673005276	0.822903519863698	-4.48262328954612
Q13163-1	MAP2K5	0.0975055534720605	3.31983829092959	1.5463963208196	0.18740880920203	0.822903519863698	-4.48322776708561
Q9UL01	DSE	0.150502037650117	3.32061408566639	1.59211822764566	0.177000172969881	0.822903519863698	-4.48346699991746
Q9H903-4	MTHFD2L	-0.218351134345584	3.31592767202115	-1.44495898857031	0.212709585538693	0.822903519863698	-4.48387741572162
Q9NW81-4	ATP5SL; DMAC2	-0.230798733714849	3.25517770861024	-1.45173130053519	0.210921029215034	0.822903519863698	-4.484945401205
Q9UIQ6-1	LNPEP	0.107293792228738	3.30249401318476	1.72370673276917	0.150174499281887	0.822903519863698	-4.4850195304526
Q14520-1	HABP2	0.233648766423331	3.3366231611118	1.41788809810001	0.220006965583513	0.823070406111797	-4.48513058024309
P23771-2	GATA3	-0.122865222401924	3.33208466747195	-1.50136463991222	0.198253344442638	0.822903519863698	-4.48537627664742
A6NFI3	ZNF316	0.103601776198941	3.33305253485604	1.5531201355624	0.185840754697944	0.822903519863698	-4.48569887710062
Q52LA3	LIN52	-0.257302862813017	3.30080602002384	-1.44452788980559	0.212823935465621	0.822903519863698	-4.48601468637463
Q9Y664	KPTN	-0.25029824410658	3.34081066606834	-1.41310432293346	0.221321422803153	0.823510997239241	-4.48606259449865
P61081	UBE2M	-0.155749774347978	3.33472858546547	-1.55014317583483	0.18653339563067	0.822903519863698	-4.48670835941821
Q9UBX1	CTSF	-0.188620568848731	3.31326654149871	-1.46361649629417	0.20781747627618	0.822903519863698	-4.48752046604433
O75586-2	MED6	0.136190397927123	3.31944106748204	1.51284026448977	0.195432374750811	0.822903519863698	-4.48841708318498
O60869-1	EDF1	0.0843554132374582	3.3231681329676	1.64706149852501	0.165254914258001	0.822903519863698	-4.48901436879969
O00291	HIP1	0.122917588095537	3.30495043526508	1.79272847145697	0.137799660868903	0.822903519863698	-4.48917281648278
Q7LGA3-1	HS2ST1	0.0921087399353482	3.31376867107312	1.64921608506647	0.164810671923813	0.822903519863698	-4.48954331904467
Q9Y243-1	AKT3	0.151161834787822	3.30330004914596	1.70396448295418	0.153919611344936	0.822903519863698	-4.49068625729746
Q9P1U0	ZNRD1	0.233403305291051	3.30067914620061	1.42664114030195	0.217621340688053	0.822903519863698	-4.49071505432964
Q9HAY2	MAGEF1	0.193173831966513	3.37564895555866	1.42842660364922	0.217137795506308	0.822903519863698	-4.4908380729139
P54819	AK2	-0.171738160006082	3.32286431484434	-1.88748920433426	0.122504903555279	0.822903519863698	-4.49090997514618
Q9Y3M2	CBY1	-0.207824860220692	3.30805508587096	-1.42376165443444	0.218403367101089	0.822903519863698	-4.49101923922965
P07711	CTSL; CTSL1	-0.258260655112351	3.31002004777514	-1.39632228655888	0.225992759693872	0.82466059431363	-4.49176023820973
Q13148-1	TARDBP	0.160351866328075	3.32314437339366	1.92377527882869	0.117127287100856	0.822903519863698	-4.4920821676152
Q8IW92	GLB1L2	0.156515249983489	3.29418410902203	1.43710400749801	0.214802522012071	0.822903519863698	-4.49223847035906
Q00577	PURA	0.088665693415101	3.32681028403552	1.68954122488003	0.156715831554961	0.822903519863698	-4.4923484274968
Q7Z309-2	FAM122B	0.192605340749711	3.28556166301144	1.39282104744079	0.226979218553998	0.82466059431363	-4.49237693007934
Q96RF0-2	SNX18	-0.160652285872124	3.35224092665981	-1.51133334713962	0.195800543268019	0.822903519863698	-4.492807550146
Q9UID3-1	VPS51	0.106688308476244	3.2993902279631	1.72957550194382	0.149079252138899	0.822903519863698	-4.49289415416698
P52739	ZNF131	0.128698864107298	3.30887693788521	1.47949448172909	0.203740711971813	0.822903519863698	-4.49297604692626
Q9UNN5-1	FAF1	-0.164291509867634	3.31521329009286	-1.73792772556849	0.147534622643754	0.822903519863698	-4.49343324368576
Q99536	VAT1	0.122410606972018	3.30206827839032	1.85055283324029	0.128244960375487	0.822903519863698	-4.49487296505454
P54198	HIRA	0.101282659833962	3.31469496327018	1.80121473167829	0.136352450747947	0.822903519863698	-4.49505075214156
Q9Y2U5	MAP3K2	-0.143471091995809	3.31583331870946	-1.4246944274258	0.218149742563032	0.822903519863698	-4.49531851832939
Q9Y592	CCDC41; CEP83	0.0971569828015713	3.30011367420193	1.54851837072457	0.186912514983034	0.822903519863698	-4.49532784218036
Q9UHN6-1	TMEM2	0.108041067237551	3.29295584674302	1.74907355732658	0.145498877928185	0.822903519863698	-4.49539243426269
Q13207	TBX2	0.125747353431359	3.30923646478245	1.4571665465536	0.209496176164367	0.822903519863698	-4.49540886196894
Q92882	OSTF1	-0.220594829955051	3.2910273904701	-1.40356691038037	0.223964675928867	0.82466059431363	-4.49570718640185
Q92545	TMEM131	-0.0800194390930045	3.30515612887856	-1.63895099087452	0.166938048148348	0.822903519863698	-4.49594155161968
P63151-2	PPP2R2A	-0.140989050378146	3.33387713683687	-1.81154239770367	0.134612409027573	0.822903519863698	-4.49612933255279
Q92871	PMM1	-0.146767654983316	3.34667278945047	-1.43019902295736	0.216658811061031	0.822903519863698	-4.49616049321617
Q9HB90	RRAGC	0.0964203843293662	3.32036648853792	1.55493855959663	0.185418924345929	0.822903519863698	-4.49634877837635
Q7L1Q6-3	BZW1	0.211660837051905	3.31502238878568	1.79833184095619	0.136842315229441	0.822903519863698	-4.49710277853682
P48449-1	LSS	-0.137513370975473	3.27194228507406	-1.71770198074307	0.151303645970794	0.822903519863698	-4.49713444594029
Q8IUH4	ZDHHC13	0.133761735757156	3.3169193673161	1.6235208679521	0.17018807323707	0.822903519863698	-4.49769081675079
P53597	SUCLG1	-0.120677363242168	3.30587085248222	-1.77938048941249	0.140108164739018	0.822903519863698	-4.49797287809833
A2RUS2	DENND3	0.349135539872144	3.31980445630051	1.55572770035005	0.185236158918826	0.822903519863698	-4.49798624253557
Q8IZE3-2	SCYL3	0.102484949885382	3.30352817241443	1.46836693988455	0.206589493170365	0.822903519863698	-4.49883808743462
Q9Y4F5	CEP170B; KIAA0284	0.213467418523096	3.26751516328872	1.40079516645777	0.224738532606501	0.82466059431363	-4.49913211318193
Q9BSL1	UBAC1	-0.180183366378758	3.31166390566225	-1.44077132161638	0.213822902508923	0.822903519863698	-4.50041697868505
Q9H9Y2	RPF1	0.16452810481619	3.34148039123232	1.51424330548372	0.195090198432234	0.822903519863698	-4.50095266544417
Q9Y587-1	AP4S1	0.253574218381056	3.30352524353009	1.37118713532497	0.233166572907138	0.82466059431363	-4.50197043016298
P20226-1	TBP	0.189039097782193	3.36619626926048	1.37098587256031	0.233224884464368	0.82466059431363	-4.50216069438076
O43237	DYNC1LI2	0.182985085670243	3.33040634115388	1.76717584558146	0.142253848565255	0.822903519863698	-4.50228346921385
Q15024	EXOSC7	0.110466764457344	3.32217499700336	1.64500793107695	0.165679454103203	0.822903519863698	-4.50256974599735
Q96MG8-1	PCMTD1	0.498160940709077	3.23789707835323	1.42648426710346	0.217663875348857	0.822903519863698	-4.50265129878013
P61296	HAND2	-0.0930918578549001	3.34476017829504	-1.49652858873013	0.19945411450384	0.822903519863698	-4.5027921964944
Q86TV6-2	TTC7B	0.130574926409619	3.29459318321605	1.49370346215534	0.200158882984798	0.822903519863698	-4.50299490705861
Q9H0R1	AP5M1	0.151483729727485	3.29820835413137	1.46679972148417	0.206993832374535	0.822903519863698	-4.50300497862954
P53701	HCCS	-0.112297743130719	3.30980358504104	-1.5785391279943	0.1800298125772	0.822903519863698	-4.50311568723554
Q5JR12	PPM1J	0.34612147473445	3.29988042529988	1.53092044006911	0.191067938291767	0.822903519863698	-4.50326557483553
Q6DKJ4	NXN	-0.150142364605049	3.33819502826762	-1.47113688919814	0.205876736610234	0.822903519863698	-4.50518992110698
Q5R3I4	TTC38	-0.202537549073446	3.34789444475459	-1.45864405330697	0.209110469366638	0.822903519863698	-4.5052082665259
P63172	DYNLT1	-0.195931928576268	3.31147442824051	-1.43989079887782	0.214057713306895	0.822903519863698	-4.50526828932331
Q17RY0-1	CPEB4	-0.169570910840988	3.34425291460837	-1.36819519821907	0.234034857431749	0.82466059431363	-4.50535116478108
P35240-1	NF2	0.121617993490524	3.30795461204857	1.63160172177744	0.168478140540018	0.822903519863698	-4.50587711523688
Q92630-1	DYRK2	-0.127423710639975	3.34843918193353	-1.45194157326673	0.21086573118641	0.822903519863698	-4.50638336874197
Q5TEU4	NDUFAF5	-0.250934348690714	3.29792155444676	-1.43303665864346	0.215894087540081	0.822903519863698	-4.50661429796228
A6NHQ2	FBLL1	-0.0722245217032994	3.30879052630865	-1.64281242206397	0.166134556423046	0.822903519863698	-4.50671518319323
O75381-1	PEX14	0.174381577661197	3.33906625924838	1.50562571301281	0.19720122946491	0.822903519863698	-4.50678670804128
Q99856	ARID3A	0.123968790829241	3.31390367042561	1.76091761022912	0.143367200925791	0.822903519863698	-4.5073088618371
Q8N8R7	ARL14EP	-0.129692376733993	3.34118054942098	-1.57936322506041	0.179844480221883	0.822903519863698	-4.50792374735774
Q6T4P5-3	LPPR3; PLPPR3	-0.190829318129748	3.32632972964275	-1.36270502707977	0.235636173250142	0.82466059431363	-4.50792517600308
Q99707	MTR	-0.121642874948465	3.33405337668543	-1.88211576708273	0.123322987216078	0.822903519863698	-4.50804318562659
Q9H9Y6-3	POLR1B	0.0921141873705817	3.31914358360635	1.82996492361718	0.13156543979009	0.822903519863698	-4.50861795654557
Q8WYH8-1	ING5	0.146320043773075	3.31288583163116	1.38160472182251	0.230167240316745	0.82466059431363	-4.5086523097442
Q6P4I2	WDR73	-0.256966916639564	3.34307560290479	-1.4406777026625	0.213847856190993	0.822903519863698	-4.50899395269326
Q86X53	ERICH1	0.157242409214036	3.31441114670511	1.46870850264949	0.206501473028256	0.822903519863698	-4.50915606142934
Q2TAY7	SMU1	0.142159126666833	3.30802386831811	1.93843943014929	0.115024940019857	0.822903519863698	-4.5093382493119
Q96CB8	INTS12	0.0801742351313621	3.32696747073579	1.63163022710926	0.168472139456504	0.822903519863698	-4.50992800356856
Q9ULP9	TBC1D24	0.0920384413128863	3.32020363716345	1.68983635539062	0.156658099653986	0.822903519863698	-4.51001547441519
P17026	ZNF22	-0.136596180395068	3.30560223227396	-1.42799934668428	0.217253411998575	0.822903519863698	-4.51044778614901
Q9NRW1	RAB6B	0.192454746744047	3.3264019322852	1.35585134400433	0.237649825295046	0.82466059431363	-4.51077885411264
Q9BVG4	CXorf26; PBDC1	-0.175324971473313	3.34156568236442	-1.55577181892588	0.18522594631818	0.822903519863698	-4.51079879955949
Q13325	IFIT5	0.0791929454394537	3.33979287802291	1.61301431107658	0.172437429278789	0.822903519863698	-4.51126516110269
O43542	XRCC3	-0.200836467738729	3.34246986453792	-1.38369397704973	0.229570178622843	0.82466059431363	-4.51141024155839
Q1ED39	C16orf88; KNOP1	-0.133807396132642	3.3235585755913	-1.78539320162432	0.139063376599979	0.822903519863698	-4.51143966694741
P37840-1	SNCA	0.164589575634419	3.33073417093109	1.51554409373015	0.194773487229836	0.822903519863698	-4.51145007938646
Q9P219	CCDC88C	0.188593346959598	3.2814851105747	1.47534092301848	0.204799552004525	0.822903519863698	-4.51149086542522
O95298-1	NDUFC2	0.197034141460453	3.2785228115473	1.51865829664233	0.194017310569539	0.822903519863698	-4.51166223164328
P04350	TUBB4A	-0.307320745905254	3.29578049222197	-1.34924494432716	0.239606297651069	0.82466059431363	-4.51175717117553
Q9UBP4	DKK3	0.21929221368239	3.19020354199253	1.37688716486607	0.231520878803159	0.82466059431363	-4.51179787199348
Q8NE62	CHDH	-0.115289256231911	3.27092805604912	-1.43596328673644	0.215108119607279	0.822903519863698	-4.51199615393613
Q9BVL2	NUPL1; NUP58	0.0964953045014495	3.31621442742015	1.60705552905255	0.17372639760787	0.822903519863698	-4.51207792057343
Q9UKN5	PRDM4	-0.213389698302638	3.32808031713625	-1.34817606156771	0.239924278739709	0.82466059431363	-4.51225240758656
O60341	KDM1A	0.137714138820514	3.3230808423616	2.04377409213882	0.10104765861779	0.822903519863698	-4.51261761682162
Q5TF39	KIAA1919; MFSD4B	0.192427517133421	3.27577864621879	1.34613469943718	0.240532674464108	0.82466059431363	-4.51359013189409
Q7Z7L8	C11orf96	-0.203943727647822	3.342231239494	-1.34728001316884	0.240191151880841	0.82466059431363	-4.51377412527483
Q96JB5-4	CDK5RAP3	0.128356059900171	3.31895542249951	1.70808493481955	0.153130161909462	0.822903519863698	-4.513997501695
Q13620-1	CUL4B	0.103778539190801	3.32249508813612	2.00904536066917	0.105445589617441	0.822903519863698	-4.51426437200996
O14757	CHEK1	-0.10462580007877	3.35155435868557	-1.73746454277419	0.147619850871871	0.822903519863698	-4.51466030191171
Q8NEY8-3	PPHLN1	0.141766665328122	3.27609493934968	1.40541845068862	0.223449163750891	0.82466059431363	-4.51474224934401
Q16881-1	TXNRD1	-0.160264882644401	3.3342143114048	-1.82316700756328	0.132681353461159	0.822903519863698	-4.51480875804359
P52434	POLR2H	-0.211464934928326	3.37934559011276	-1.49034373833136	0.201000196234783	0.822903519863698	-4.51510797820456
A8MT69-1	STRA13; CENPX	-0.186571397309659	3.32650230745989	-1.34118484983921	0.242013976488033	0.82466059431363	-4.51543981499378
Q5VZL5	ZMYM4	0.155388263138735	3.3115451135754	1.95738421849263	0.112367576932458	0.822903519863698	-4.51550341155981
Q9Y3Q0	NAALAD2	0.0935763137506747	3.31482214010711	1.68984606285796	0.156656201097192	0.822903519863698	-4.51554455656381
Q9BUA3	C11orf84	0.10671197232841	3.31069788057479	1.62885525947511	0.169057350556546	0.822903519863698	-4.51700040696941
Q9BRA2	TXNDC17	-0.135334867588482	3.34475057169428	-1.58908251687464	0.177673018304947	0.822903519863698	-4.51703553652158
Q9BRP4	PAAF1	-0.0839038510707603	3.32801089094951	-1.60791007996166	0.173540953918895	0.822903519863698	-4.51743514651166
Q9BUH6	C9orf142; PAXX	-0.160998853316685	3.31089057226166	-1.37795931204759	0.231212574181908	0.82466059431363	-4.51750832178427
Q53G59-2	KLHL12	-0.152626236371538	3.3413554565759	-1.3593861525895	0.236609242440058	0.82466059431363	-4.51773697018733
Q969Z4	RELT	0.238609781599992	3.31527727272841	1.35922088918548	0.236657796241571	0.82466059431363	-4.51775377172891
Q8N129	CNPY4	0.110834793427703	3.34808898653549	1.43421634330281	0.215576940263296	0.822903519863698	-4.51781504416519
Q9HCG7	GBA2	0.104957391910712	3.28919997416572	1.62918220280824	0.168988295407719	0.822903519863698	-4.51803210971045
Q9H6R0-1	DHX33	0.131186534119581	3.31819415071905	1.6770081679966	0.159187555178008	0.822903519863698	-4.51834037320955
Q9UBB9-1	TFIP11	0.103585353613011	3.32688341108094	1.86268604954635	0.126329061232321	0.822903519863698	-4.51858483302509
Q9NW64-1	RBM22	0.0930696053790399	3.34925574557869	1.74031781921056	0.147095633250399	0.822903519863698	-4.51867601416764
Q15013-3	MAD2L1BP	0.31442737023141	3.28668942735851	1.41383528774127	0.221120083588965	0.82337721987263	-4.51882825748427
P08574	CYC1	-0.118627639431721	3.27580227181169	-1.60163928222968	0.174906393146224	0.822903519863698	-4.51899212167759
Q9BYV8	CEP41	0.105803920943324	3.31001636259866	1.53271732259797	0.190639478731917	0.822903519863698	-4.51905552613801
Q9H9P2	CHODL	-0.223030209908258	3.39686309202639	-1.33661594402263	0.243388939494283	0.82466059431363	-4.51960875158308
Q12872-2	SFSWAP	0.102722210355225	3.32943701509397	1.80281161791632	0.136081887050135	0.822903519863698	-4.51969228555148
O15381-1	NVL	0.109586896116521	3.30183834161254	1.85234388332215	0.127960249241364	0.822903519863698	-4.51988692354146
P49754	VPS41	0.0976957045802648	3.31484115983305	1.74105956183945	0.146959669652568	0.822903519863698	-4.52006033625001
Q9H741	C12orf49	-0.217947901845104	3.32418620480409	-1.33263026875482	0.244594416100766	0.82466059431363	-4.52010197399837
Q9NQZ2	UTP3	0.233936414571876	3.31338376134897	1.519757617315	0.193751070593687	0.822903519863698	-4.52030647544946
Q9BZV1	UBXN6	-0.126583218789618	3.31559975280868	-1.5106365504218	0.195971014851459	0.822903519863698	-4.52036438373625
Q16563-2	SYPL1	0.197038624646954	3.30622819449063	1.35073369469126	0.239164076799456	0.82466059431363	-4.52129379982649
P33240	CSTF2	0.0712055247654462	3.32849664086296	1.69566101817295	0.155523128300342	0.822903519863698	-4.52147972973404
Q8IW50-6	FAM219A	-0.133527480398876	3.30022839844673	-1.38894638859863	0.228075701371711	0.82466059431363	-4.52153242204631
P50440-1	GATM	-0.204964534615094	3.2704772205073	-1.32565153084483	0.246718744040521	0.82466059431363	-4.52179364791437
P11172	UMPS	-0.189992830723581	3.33164144371072	-1.89266194073875	0.121722740821235	0.822903519863698	-4.52215037349518
Q9NRN7	AASDHPPT	-0.218745884984384	3.3304430769523	-1.71945645255712	0.150972836481408	0.822903519863698	-4.52286016630438
Q6NYC8	PPP1R18	0.117945158902981	3.3140945942739	1.6572725371656	0.163160227803281	0.822903519863698	-4.52335080735774
Q9H9F9	ACTR5	-0.150879470701044	3.33040927273506	-1.49538768306655	0.199738436100598	0.822903519863698	-4.52335971898017
O60568	PLOD3	-0.126556133192428	3.31726846658562	-1.71797779530288	0.151251591489497	0.822903519863698	-4.52408520850258
P34949	MPI	0.169179666775391	3.32149985302195	1.56132139049044	0.183945780637628	0.822903519863698	-4.52431368071413
Q9Y4L1	HYOU1	0.0771199901142966	3.32629313808366	2.01484078334966	0.104697753011718	0.822903519863698	-4.52447944634815
Q504T8	MIDN	0.224191462433886	3.27137941283494	1.32104183461238	0.248131466223686	0.82466059431363	-4.52468464000608
O43347	MSI1	-0.135648022675004	3.31311679893799	-1.66175161493359	0.162249888331695	0.822903519863698	-4.52470431727139
Q9Y3T9	NOC2L	0.113127235316896	3.32056740123822	1.78469798665656	0.139183767124818	0.822903519863698	-4.5247487469888
P02452	COL1A1	0.215930955033137	3.34132591454606	1.32332159718797	0.24743184292908	0.82466059431363	-4.52478757268538
Q9UMX5	NENF	0.107807022032434	3.3541938825284	1.46145611649276	0.208378283554536	0.822903519863698	-4.52503445524009
Q9H4A5	GOLPH3L	-0.157183558656254	3.32874626856706	-1.41243070354265	0.221507123076981	0.823510997239241	-4.5256008524716
Q9H773	DCTPP1	-0.129156666371114	3.3318827578711	-1.58653609726589	0.178239387740847	0.822903519863698	-4.52608374327493
P18583-5	SON	0.0867212140710508	3.32563469664352	2.16239030393538	0.0874455811910099	0.822903519863698	-4.52653019730308
Q9NW38-2	FANCL	0.124768668647597	3.30086388179644	1.45596177461943	0.209811197515834	0.822903519863698	-4.52671774763991
O00287	RFXAP	0.131122930403968	3.33486022795876	1.39659827873621	0.225915175320295	0.82466059431363	-4.52762996868396
Q6N063-1	OGFOD2	-0.153204880234572	3.32863877311495	-1.33655690562932	0.243406754735574	0.82466059431363	-4.52788054905467
Q6PID6	TTC33	-0.137677133147476	3.34148541996401	-1.34354865104882	0.24130550556093	0.82466059431363	-4.52816119791244
P52294	KPNA1	0.118413512641944	3.31641481002888	1.42497775273785	0.218072761709591	0.822903519863698	-4.52855717980118
Q15020	SART3	0.0908035328282114	3.31406729696822	2.06410358840891	0.0985642170686069	0.822903519863698	-4.52889309725246
Q9UKD2	MRTO4	0.115321451187014	3.30363177853825	1.7053456317982	0.153654531431558	0.822903519863698	-4.52908878143694
P07384	CAPN1	0.115010675895928	3.29616732260729	1.83055656965884	0.13146878021271	0.822903519863698	-4.52939370471791
P54756	EPHA5	-0.770930157220091	3.45754017673499	-1.85139358965015	0.128111228904036	0.822903519863698	-4.52941163795713
Q9UNY4-1	TTF2	0.13261889577309	3.29356280766833	1.94951058470741	0.113464053875965	0.822903519863698	-4.52942565360867
Q96E39	RBMXL1	0.141770450308659	3.33436024846642	1.36366854041179	0.235354392632306	0.82466059431363	-4.52949360866789
Q15435	PPP1R7	-0.172239884103339	3.3310964687104	-1.68875961160245	0.156868831298027	0.822903519863698	-4.52982244630785
O60909-3	B4GALT2	-0.184091542522084	3.28657481756446	-1.30493157973331	0.253128745780676	0.82466059431363	-4.53015473393197
O95801	TTC4	-0.124687453027453	3.34325465133069	-1.60675613818602	0.173791414597624	0.822903519863698	-4.53018105889544
P15907	ST6GAL1	0.119375964610224	3.32487872348274	1.54876085998282	0.186855885919623	0.822903519863698	-4.53026873333121
Q96P71-1	NECAB3	-0.314367775525902	3.25861756876706	-1.32388232291926	0.247260050049753	0.82466059431363	-4.53124813776792
Q9BVV6-3	KIAA0586	0.120404587942309	3.304328094016	1.57193423020795	0.181522097465459	0.822903519863698	-4.53206959682246
Q15165-1	PON2	-0.122561404766541	3.29513367015521	-1.35144663318233	0.238952578805832	0.82466059431363	-4.53254007342381
Q9NUJ7	PLCXD1	0.321223304672481	3.31098112070655	1.31933102578994	0.248657709851427	0.82466059431363	-4.53298680848667
O95503	CBX6	-0.137993962673759	3.39155311739485	-1.31493749325889	0.250013974128881	0.82466059431363	-4.53332688862938
Q86XR7-2	TMED7-TICAM2; TICAM2	0.0792453394643192	3.32205940206614	1.62055932760016	0.170819108863831	0.822903519863698	-4.53397297980778
Q9Y2G3	ATP11B	-0.0929745044206352	3.30298161068242	-1.45547103658455	0.209939646845491	0.822903519863698	-4.53451260252674
Q9UI36-1	DACH1	0.0958560152353101	3.25931403629633	1.6459200220796	0.165490759101728	0.822903519863698	-4.5346952851768
Q96JB2-1	COG3	0.0687596760194019	3.33323340302714	1.79529438299935	0.1373604137396	0.822903519863698	-4.53550272802716
Q8WVD3-1	RNF138	-0.132433416300102	3.32872218066966	-1.41472833323406	0.220874340027842	0.823070406111797	-4.53562305528845
P04066	FUCA1	0.175990154300569	3.32500451265847	1.29141644716455	0.257393689642727	0.82466059431363	-4.53563547281491
Q9NRR4-1	DROSHA	0.0997028861599125	3.31159934869797	1.72962433390722	0.149070173354721	0.822903519863698	-4.5357702681469
O43447	PPIH	-0.149766431269194	3.34443306164297	-1.61288996216566	0.17246422935317	0.822903519863698	-4.53614075007342
Q99741	CDC6	0.101356879421757	3.31982988466788	1.56435157853472	0.183250500492681	0.822903519863698	-4.53615622685125
Q75QN2	INTS8	0.0964393563371882	3.32017893537596	1.58196482922698	0.179260650636216	0.822903519863698	-4.53644920583385
P41162	ETV3	-0.133699880995147	3.29250199228476	-1.34614695433737	0.240529017723736	0.82466059431363	-4.53671285302433
P22033	MUT	-0.0947951303770559	3.30070058776446	-1.80013373765462	0.136535921686352	0.822903519863698	-4.53686512091162
Q59EK9-1	RUNDC3A	0.0907515531519075	3.29861761365769	1.52585440264271	0.192281047650535	0.822903519863698	-4.53690829634723
Q9NVV4	MTPAP	-0.0991251635508706	3.28442473795376	-1.56807029476257	0.182400810980775	0.822903519863698	-4.53700335209238
Q8TDG4	HELQ	0.232183660790453	3.2652798366937	1.28845411605626	0.258337441086563	0.82466059431363	-4.53714651222661
Q9UJ68-1	MSRA	-0.164797571289805	3.28915912055179	-1.36867631433086	0.233895025847988	0.82466059431363	-4.53803874302329
Q7LFX5-1	CHST15	-0.275705723007998	3.72133190918224	-1.32603678042414	0.246601021499679	0.82466059431363	-4.53808450438345
Q9H4G0-2	EPB41L1	0.112819161433933	3.29440316384429	1.65719353793581	0.163176330133361	0.822903519863698	-4.5381581084508
Q9BSM1	PCGF1	-0.12397562143061	3.36668576668845	-1.382105113602	0.230024104540503	0.82466059431363	-4.53819734426894
Q13206	DDX10	0.184387460790966	3.30390787989077	1.8082099349698	0.135171347056805	0.822903519863698	-4.53846220216378
Q02446	SP4	-0.193469443505477	3.33616276117772	-1.28745128194295	0.258657659242454	0.82466059431363	-4.53855614686167
Q9NYH9	UTP6	0.127258415845152	3.3264208035706	1.86804070462988	0.125493051136396	0.822903519863698	-4.53868745717337
Q96H12	MSANTD3	-0.198915936496429	3.31396904940158	-1.28295285511122	0.260098626964853	0.82466059431363	-4.53872275889972
O00462	MANBA	0.0932389528428432	3.30170338079414	1.52821931901027	0.191713802148375	0.822903519863698	-4.53907595007216
P51397	DAP	0.10230500035618	3.28543349165852	1.4285185603861	0.217112919635164	0.822903519863698	-4.53916086405908
Q6NXT6	TAPT1	-0.131714581580601	3.32601395484653	-1.45675902894848	0.209602681478447	0.822903519863698	-4.53932796847176
Q5VTR2	RNF20	0.143461063137661	3.32412001207733	1.96072524582632	0.11190569252114	0.822903519863698	-4.5395922789131
Q9Y385	UBE2J1	0.261029019577064	3.29424522795272	1.39501800387246	0.22635975380619	0.82466059431363	-4.53988308545904
P63313	TMSB10	0.33697665104925	3.33950609484768	1.2946908428612	0.256354267465612	0.82466059431363	-4.54000167539385
Q9NUP9	LIN7C	0.110257674700175	3.321795540273	1.49461564381464	0.199931059328246	0.822903519863698	-4.54050230158671
P15586	GNS	0.100968038354713	3.35652886322394	1.55530130750137	0.185334889492453	0.822903519863698	-4.5406507113763
Q9H898-1	ZMAT4	0.0862585756516173	3.29700252470076	1.52329100781572	0.192897772629994	0.822903519863698	-4.54081963688519
Q6ZU65-1	UBN2	0.090282495588574	3.32246331395033	1.73227448158809	0.14857830909542	0.822903519863698	-4.54124128587932
O75330-3	HMMR	0.0763727556714941	3.3085144860973	1.88114856433695	0.123470845818941	0.822903519863698	-4.54126985862922
Q9GZN2-1	TGIF2	-0.282609377931654	3.35920672203931	-1.28541484611672	0.259309059964625	0.82466059431363	-4.54136563599744
Q13888-1	GTF2H2; GTF2H2C	0.107109666540929	3.32243701467243	1.49893719196505	0.198855178540804	0.822903519863698	-4.54169689899145
Q9H694-1	BICC1	-0.211892350840235	3.34547459662713	-1.33151103923461	0.244933942935138	0.82466059431363	-4.54185003731462
Q9BZX2-1	UCK2	-0.139128870413587	3.34538227280487	-1.50020217370167	0.198541329535583	0.822903519863698	-4.54226751478553
P13984	GTF2F2	0.114839451842509	3.31574959816957	1.64208935710514	0.16628471513918	0.822903519863698	-4.54244749798151
Q8NAV1-1	PRPF38A	0.0940268892355564	3.32183564159714	1.44673900264932	0.212238064247078	0.822903519863698	-4.54257965780996
Q6NUK4	REEP3	0.135492818587077	3.29549992659409	1.48428769412738	0.202525465669678	0.822903519863698	-4.54265324614029
O60337	MARCH6	-0.107405078338495	3.3106147740595	-1.36394102331871	0.235274762908155	0.82466059431363	-4.5429514384502
Q96E52-1	OMA1	-0.145257890327853	3.25236497999759	-1.3466229240999	0.240387033851277	0.82466059431363	-4.54326247282837
Q9UID6	ZNF639	0.122695298341877	3.32971706080552	1.56559353234707	0.182966289034686	0.822903519863698	-4.5433035866106
Q99547	MPHOSPH6	0.119911602091685	3.31506219428827	1.51283721547243	0.195433118994595	0.822903519863698	-4.54348233039721
O75970	MPDZ	0.0769532830145835	3.31000979447174	1.83483412209583	0.130772131174311	0.822903519863698	-4.54350072632527
O43516-3	WIPF1	0.13044399456678	3.32746155866635	1.31135021500913	0.251126506559947	0.82466059431363	-4.54367437218147
Q13825	AUH	-0.114525340843883	3.27885592400955	-1.3581406493418	0.236975400394439	0.82466059431363	-4.54481172925797
Q52WX2	SBK1	0.110529119557694	3.31395132077714	1.39178887840122	0.227270815298856	0.82466059431363	-4.54484873973028
Q9Y2Z2-6	MTO1	-0.0838696761208598	3.29053878342796	-1.55471026117315	0.185471831793067	0.822903519863698	-4.54489937567276
Q9H0G5	NSRP1	0.10111318310714	3.31869408059518	1.56459906204612	0.183193830777835	0.822903519863698	-4.54544130784821
Q6PJ69	TRIM65	-0.143309475214103	3.30592777564551	-1.48755275268695	0.201701727328094	0.822903519863698	-4.54574443056399
Q9Y3C4-3	TPRKB	-0.155522399677255	3.33574264880673	-1.36524926165789	0.23489280385828	0.82466059431363	-4.5460194358974
Q52LR7	EPC2	0.0987145373413222	3.31692307280195	1.63962337999058	0.16679785506318	0.822903519863698	-4.54673141694723
P52298-1	NCBP2	0.170056432446488	3.34389819167403	1.50697137956935	0.19687010923784	0.822903519863698	-4.54755820426586
Q92664	GTF3A	-0.102775548871431	3.27812552634412	-1.39412122702341	0.226612417263515	0.82466059431363	-4.54758233633523
O43251-8	RBFOX2	0.083372664419097	3.32952814928066	1.70209153034212	0.154279826978102	0.822903519863698	-4.54773513048088
Q01850	CDR2; LOC101060399	0.0968213411811586	3.31663208419921	1.51228860551584	0.195567076307723	0.822903519863698	-4.54777646539531
Q9H5J0	ZBTB3	0.167286495189611	3.29237634566256	1.27836042189391	0.26157742186392	0.82466059431363	-4.54792697295946
Q96PV6-2	LENG8	0.0809333376202317	3.3390664279563	1.64692894297938	0.165282284633813	0.822903519863698	-4.54814119332876
O75962-1	TRIO	0.100094740512993	3.29792115669346	1.91953055591175	0.117743352467827	0.822903519863698	-4.5481964884103
Q8NI08-2	NCOA7	0.0811044808338007	3.31401336262998	1.69614071019757	0.155430031330433	0.822903519863698	-4.54833218097753
P78509	RELN	0.121856581209604	3.28544619982537	1.39864726678933	0.225339982008066	0.82466059431363	-4.54843985774899
O14787-2	TNPO2	0.129564680161908	3.29842664662949	1.53133668972514	0.1909686005196	0.822903519863698	-4.54865536506697
P20929-2	NEB	-0.230161112647885	3.30338676419398	-1.29069979257087	0.257621708678435	0.82466059431363	-4.54888945009277
Q9BVN2	RUSC1	0.237275897160478	2.9649245743709	1.27116654787821	0.263909632046211	0.82466059431363	-4.54893811322108
Q9NRF2-2	SH2B1	0.0963774799943244	3.31669452442837	1.45116711780062	0.21106946903887	0.822903519863698	-4.54900175443694
O14732-1	IMPA2	0.0956062951435075	3.32451148900186	1.47227102835138	0.205585596141137	0.822903519863698	-4.54905183860399
Q6PII3	CCDC174	0.128506376462659	3.32133896770872	1.56102534257351	0.184013849758445	0.822903519863698	-4.54910324515621
Q9NPG3-1	UBN1	0.1161704643589	3.30380178925247	1.80020540385865	0.136523750288874	0.822903519863698	-4.5499761577049
Q9ULK5	VANGL2	0.1134391809343	3.30948491641124	1.34793565568057	0.239995852022433	0.82466059431363	-4.55163084512999
Q6P087	RPUSD3	-0.109472261458443	3.2915324671691	-1.45280566559523	0.21063863810343	0.822903519863698	-4.55194959862067
Q8IWX8	CHERP	0.0958052506296098	3.32470903978472	1.87268812897184	0.124772141976498	0.822903519863698	-4.55217185287686
Q8IVQ6	ZDHHC21	0.192276700052836	3.28858628157606	1.24671262721075	0.271982387079149	0.82466059431363	-4.55241762162998
P35221-2	CTNNA1	0.109600846669468	3.3014505334902	1.91823881104984	0.117931507334583	0.822903519863698	-4.55262108449887
Q9BS26	ERP44	0.0620311790201465	3.34353062312969	1.72393465586357	0.150131810289799	0.822903519863698	-4.55282980912106
Q9H7P6	FAM125B; MVB12B	-0.130867292590867	3.31808429726861	-1.37623182543667	0.231709520375605	0.82466059431363	-4.55314423530111
Q9UBE0-1	SAE1	-0.0692683212307852	3.34186586728074	-1.89682998258982	0.121096302528802	0.822903519863698	-4.55383652301822
P36383	GJC1	0.179892292055573	3.2763841862932	1.28655403695838	0.258944475291763	0.82466059431363	-4.55403143235521
Q5T2E6-1	C10orf76	0.123945634173151	3.3194066880709	1.51968896623236	0.193767686361134	0.822903519863698	-4.5540923138154
P17812	CTPS1	-0.406629416102733	3.34864246311484	-1.92793858101998	0.116526330474586	0.822903519863698	-4.55547859667545
Q9NW08	POLR3B	0.0794088002553338	3.3265390071956	1.93116226146957	0.116063233068786	0.822903519863698	-4.55602825047864
Q06210-1	GFPT1	0.167399859232287	3.30960829048777	2.02444081350152	0.103471346217267	0.822903519863698	-4.55645536951645
O94819	KBTBD11	-0.137570954631518	3.31989992902264	-1.40290480396448	0.224149299390396	0.82466059431363	-4.55683419164854
Q9Y487	ATP6V0A2	0.143281226488885	3.30691058847724	1.4437931497895	0.213018964489302	0.822903519863698	-4.55687965601057
Q86VZ4	LRP11	0.13075728673311	3.26387461280708	1.32641085455622	0.246486764586963	0.82466059431363	-4.55711844388348
Q8N8N7-1	PTGR2	-0.188415033007084	3.33199209147161	-1.36060027191459	0.236252828960097	0.82466059431363	-4.55787337068329
P51788-1	CLCN2	0.207779983582131	3.28553726369034	1.22633910840079	0.278881395517433	0.82466059431363	-4.55796282324317
P53778	MAPK12	0.108535852320951	3.31087963815761	1.4822345053866	0.203045149249749	0.822903519863698	-4.55797673259441
Q96HR8	NAF1	0.148946195082251	3.29994119129917	1.43526542316781	0.215295284025411	0.822903519863698	-4.55805123768472
P07996	THBS1	0.121421478453367	3.3284099186387	1.32316056434956	0.247481200305704	0.82466059431363	-4.55814032390903
P49916-1	LIG3	0.111586364094756	3.31630437065338	2.07655346452375	0.0970755853477366	0.822903519863698	-4.55816307633137
Q5VW36	FOCAD	0.100176825791303	3.28584373233225	1.67518878897891	0.159549644429503	0.822903519863698	-4.55848138185538
Q6IN85	SMEK1; PPP4R3A	0.14075226340982	3.31882023097635	1.77045029583982	0.141674868606371	0.822903519863698	-4.55862463356804
Q00796	SORD	-0.138786909513909	3.31871849586004	-1.83490646621965	0.130760382144129	0.822903519863698	-4.55878675660309
P19440	GGT1	0.152965631539303	3.32559653896808	1.24432437693841	0.272782907970323	0.82466059431363	-4.55952020845027
P50053	KHK	-0.206698755287064	3.34033765949075	-1.21980298955872	0.281128486561311	0.82466059431363	-4.55996916061876
P48426	PIP4K2A	0.0798315329142882	3.31837155582651	1.60333762182966	0.174535526746129	0.822903519863698	-4.5601154635135
P17931	LGALS3	-0.305871229014681	3.29224987633617	-1.24522708092593	0.272480074443968	0.82466059431363	-4.5602693848893
Q9HC96	CAPN10	-0.516185021132634	3.27903767874211	-1.44005460045961	0.214014013075438	0.822903519863698	-4.56074092728569
Q6I9Y2	THOC7	0.103028290547035	3.32477989940073	1.62066391210953	0.170796784288942	0.822903519863698	-4.5611855641565
Q8N7H5	PAF1	0.126926776701632	3.32934768182885	1.71430805487642	0.151945682295263	0.822903519863698	-4.56138744025065
Q6N069	NAA16	0.11731598314721	3.31229881447157	1.75655305214573	0.144148967780066	0.822903519863698	-4.56145081425179
Q9BUV8-5	C20orf24	-0.10765077280693	3.29014670481593	-1.45620788786341	0.209746806859177	0.822903519863698	-4.56165304929563
Q9NYM9	BET1L	-0.17577868246398	3.3317313027332	-1.25517353964179	0.269163770307389	0.82466059431363	-4.56242501986165
Q6NUQ1	RINT1	0.0878686285043363	3.31731993804283	1.63193476689929	0.168408039674671	0.822903519863698	-4.56247750267356
Q969M7-2	UBE2F	-0.154295151869014	3.32839012713997	-1.32311630201605	0.247494768559576	0.82466059431363	-4.56270809260372
O75676	RPS6KA4	-0.345691149508249	3.30521935828494	-1.25374941172426	0.269636299545136	0.82466059431363	-4.56309385095736
Q6IPU0	CENPP	0.131690620223709	3.31775030870283	1.31931482550535	0.248662698066611	0.82466059431363	-4.56324061972948
Q8TCD1	C18orf32	-0.133986152000994	3.32337016544687	-1.31364191927556	0.250415238564453	0.82466059431363	-4.56346355966395
Q9NP50-1	FAM60A	-0.103860375113957	3.34388336908882	-1.33816795087629	0.24292105287759	0.82466059431363	-4.56354136789053
Q8IX18	DHX40	0.103698515824713	3.31775940161356	1.71070661563371	0.152630018409163	0.822903519863698	-4.56376298541043
Q9BQF6	SENP7	0.106184820672678	3.30394620925548	1.66454671391055	0.161684413439614	0.822903519863698	-4.56406943076135
Q70Z53	FRA10AC1	-0.0955862564553798	3.32246067053515	-1.38723169715419	0.22856255782749	0.82466059431363	-4.56414310337147
Q9BZ29-4	DOCK9	-0.156330721970253	3.31083503675584	-1.23554998040041	0.275742674234798	0.82466059431363	-4.56532192799058
O75915	ARL6IP5	-0.224295942500031	3.35423335840913	-1.20206178014824	0.287311461818748	0.82466059431363	-4.56558126083134
O60907	TBL1X	-0.139619978533164	3.34247848894994	-1.38321468663505	0.22970701779147	0.82466059431363	-4.56562913909582
P78527	PRKDC	0.088513831616246	3.32416650984618	2.71695881494162	0.0455650443323856	0.822903519863698	-4.56570487366944
Q5T4F4-2	ZFYVE27	0.113581843460902	3.30791134086447	1.35793745711221	0.237035186757051	0.82466059431363	-4.5659781620176
O75478	TADA2A	-0.15706282059994	3.31220112304844	-1.33064434685187	0.245197166460026	0.82466059431363	-4.56603288713578
Q9Y3B8-1	REXO2	0.104060184418514	3.31739973154717	1.46130248505466	0.208418220467214	0.822903519863698	-4.5662638147583
Q9Y5Q9	GTF3C3	0.093785303489675	3.31874405302458	1.75202545762328	0.14496456972267	0.822903519863698	-4.56633878102179
O00483	NDUFA4	0.394757449757983	3.23670776767788	1.55795380071951	0.18472155718277	0.822903519863698	-4.56635748808447
Q8N4P3	HDDC3	-0.200603645955564	3.32817314346935	-1.24250229052716	0.273395115021611	0.82466059431363	-4.56651788673352
Q9NX20	MRPL16	-0.127935447395794	3.30470895023457	-1.28892271830115	0.258187937086039	0.82466059431363	-4.56656499301953
O75351	VPS4B	-0.147539539059762	3.33081234103453	-1.80217532234892	0.136189629258468	0.822903519863698	-4.56688432702003
Q9GZZ1-1	NAA50	-0.34470702000378	3.35830112141357	-1.70154711496557	0.154384692824739	0.822903519863698	-4.5669931726487
Q9UNL2-2	SSR3	-0.152414610902409	3.24532089157154	-1.23249199328728	0.27678110867175	0.82466059431363	-4.56719851048407
O43159	RRP8	-0.0676349169472109	3.32381302005291	-1.65870415428764	0.162868701295512	0.822903519863698	-4.56745760401379
Q5R372-5	RABGAP1L	0.138327770051881	3.30598874168351	1.34934820678571	0.239575599373118	0.82466059431363	-4.56754078768853
Q8N488	RYBP	0.130529212967319	3.33085667664644	1.29838220400724	0.255187190929428	0.82466059431363	-4.5676111341707
Q9Y282-3	ERGIC3	0.128252782170576	3.33330582838525	1.50810133642148	0.196592490086282	0.822903519863698	-4.56771962328501
Q17R31-3	TATDN3	-0.266374281585837	3.27222750919247	-1.20500861735005	0.286275956011899	0.82466059431363	-4.56782361914733
Q9Y2F5	KIAA0947; ICE1	0.0999130015754351	3.31473230723862	1.65101258061897	0.164441185290632	0.822903519863698	-4.56861552453078
Q2VWP7	PRTG	0.135112653250376	3.37744763819587	1.2888249532653	0.258219121612275	0.82466059431363	-4.5692630021102
P21399	ACO1	-0.219811837249006	3.36100903531115	-1.81503668885613	0.134028900097774	0.822903519863698	-4.56979628884928
Q969S3	ZNF622	0.123223519668701	3.30637633583614	1.62224780689169	0.170459045171172	0.822903519863698	-4.5701429531107
P40424-2	PBX1	0.0887168665903568	3.33339507107577	1.48503949930784	0.202335501907565	0.822903519863698	-4.57042863579113
O43294-1	TGFB1I1	-0.188401668598509	3.34280338284965	-1.21138413138741	0.284047246352024	0.82466059431363	-4.57046643727879
Q99873	PRMT1	0.0469838316649868	3.31673645299447	1.97550594018923	0.10988625283209	0.822903519863698	-4.57047297215667
Q6NVV7	CDPF1	-0.181374668032182	3.32628083466065	-1.23409606644245	0.276235948793592	0.82466059431363	-4.57069372793262
P59768	GNG2	-0.16585288573916	3.28920503142337	-1.24193436412372	0.273586192451554	0.82466059431363	-4.57091850413016
P48681	NES	0.130814396067327	3.31272797493816	2.08982929968249	0.0955146455052298	0.822903519863698	-4.5711145380665
Q9H8M7-1	FAM188A; MINDY3	0.125371372446767	3.3161942390458	1.34156820894014	0.241898943640844	0.82466059431363	-4.57164370413851
Q5T6F0	DCAF12	-0.12373278220071	3.34306939765355	-1.31819184693134	0.249008703053007	0.82466059431363	-4.57176531470287
Q9HCN8	SDF2L1	-0.101371122397626	3.33274956602458	-1.38544969913298	0.229069579702991	0.82466059431363	-4.5718924776741
Q92890-1	UFD1L; UFD1	0.103995652551254	3.31948478274797	1.65780659664989	0.163051413197772	0.822903519863698	-4.5720033501058
A6NDG6	PGP	-0.130474964498511	3.31636572995079	-1.63693857754061	0.167358346929499	0.822903519863698	-4.57248602020104
O95602	POLR1A	0.0738813688864586	3.32175624881025	2.03878230298705	0.101667601128974	0.822903519863698	-4.57287444468547
Q9HCS7	XAB2	0.0911219415062529	3.30891520418114	1.81976885347316	0.13324285734558	0.822903519863698	-4.57322660753935
Q9H0C5	BTBD1	-0.133484480945881	3.34056610416965	-1.24177438234285	0.273640040117827	0.82466059431363	-4.57350961982545
Q6PJP8	DCLRE1A	0.0948385598165866	3.30966813381536	1.40379839249282	0.223900163369589	0.82466059431363	-4.5736386304332
O94842	TOX4	0.131397746403238	3.3392598123318	1.49993663591936	0.198607170547617	0.822903519863698	-4.57441281358936
P56559-2	ARL4C	0.186048782175232	3.33174376151924	1.18520846413705	0.293299261847236	0.826388214615994	-4.57450638661467
Q5MNZ6	WDR45B; WDR45L	0.189050745406567	3.3149449617443	1.43366977978779	0.215723822652299	0.822903519863698	-4.57478175355742
Q14151	SAFB2	0.126876720799093	3.31006663185114	1.78830502281017	0.138560303054954	0.822903519863698	-4.57521252574175
Q96MD7-1	C9orf85	0.169650657140416	3.32922982263147	1.1921278301748	0.290827331089976	0.825727735683255	-4.57536636241841
Q8NFD5-3	ARID1B	0.094641410792233	3.31555614335478	1.86473189885355	0.126008963319201	0.822903519863698	-4.57602699802177
Q9UHL9	GTF2IRD1	0.0879114212474618	3.30186877803235	1.59077429944286	0.1772977308263	0.822903519863698	-4.57614920782473
O95551-2	TDP2	-0.163599186268428	3.34227191751479	-1.32454821661359	0.247056182266978	0.82466059431363	-4.57647959286814
O43257	ZNHIT1	0.273198232826359	3.24603108444562	1.18184153253485	0.294508952348287	0.826388214615994	-4.576911089225
Q6NSI8-1	KIAA1841	0.115543376035	3.29991215293488	1.31713369551227	0.249335148485342	0.82466059431363	-4.57704528067899
Q9NRY2-1	INIP	0.113616542706102	3.33919407404334	1.28522808066841	0.259368877715538	0.82466059431363	-4.57727955314693
Q9UPX8-3	SHANK2	0.192976600916367	3.28543827778844	1.16316034428828	0.301302938966234	0.826388214615994	-4.57750708355434
Q8WUM9	SLC20A1	0.140648862676655	3.30569860456257	1.26154328490378	0.267059631132983	0.82466059431363	-4.57763440186121
Q9GZN1	ACTR6	0.0781739165771521	3.33532807275124	1.49414876653397	0.200047633332376	0.822903519863698	-4.57776738021922
P17612	PRKACA	0.112611048725342	3.30232724265246	1.63906246351177	0.166914797892237	0.822903519863698	-4.5778300680741
Q86WT1	TTC30A	0.180542871382329	3.2742274940645	1.16080995205493	0.302167635880566	0.826388214615994	-4.57790357761831
P24941-1	CDK2	0.0881809242682958	3.32880791152767	1.56370911601229	0.183397695459747	0.822903519863698	-4.57799415375843
P55039	DRG2	0.0784020783496103	3.30880742361887	1.7739733643403	0.141054639235869	0.822903519863698	-4.57868411453216
P15336-1	ATF2	0.100394454780069	3.31674793932959	1.59687125382084	0.175951813701033	0.822903519863698	-4.57879523573392
Q9BSD7	NTPCR	-0.183506848307035	3.33356860438685	-1.41771993960095	0.22005304319353	0.823070406111797	-4.57900612375769
Q8IWB7	WDFY1	0.0792255986228038	3.32503232176049	1.64296277357231	0.166103350160093	0.822903519863698	-4.57928512513201
Q99808-2	SLC29A1	0.135143448750506	3.30806204438164	1.21533615762255	0.282673677634536	0.82466059431363	-4.57938979613597
Q8N5P1	ZC3H8	0.124454466483593	3.30662177285305	1.50278516675863	0.197901985784742	0.822903519863698	-4.57947780259392
Q8TEX9-2	IPO4	0.0864087193927771	3.30119710604771	1.71354348083372	0.152090702177142	0.822903519863698	-4.57958718401285
Q15334	LLGL1	0.114416343624049	3.31302510284495	1.65887448622683	0.162834050969621	0.822903519863698	-4.5799354337887
P13637-3	ATP1A3	0.0766188800262634	3.3234179124036	1.79244604218554	0.137848097315146	0.822903519863698	-4.58006774251523
Q86YC2	PALB2	0.120089658577058	3.27900301390443	1.4709722286589	0.205919039443982	0.822903519863698	-4.58023460059416
Q9UKU7	ACAD8	-0.144953183786559	3.28316908437196	-1.27580366142705	0.262404103984611	0.82466059431363	-4.58038336737856
Q86WW8	COA5	-0.118175455818374	3.29868726828322	-1.27196516097195	0.263649776133866	0.82466059431363	-4.58057746410963
Q9BUT9-1	FAM195A; MCRIP2	-0.374287454758661	3.33277724685195	-1.17547881037548	0.296807295179501	0.826388214615994	-4.58061199043156
Q00013-1	MPP1	-0.077900240536203	3.31765580229391	-1.53999717055591	0.18891333556828	0.822903519863698	-4.58085571382934
Q8N6N7	ACBD7	-0.187614914147681	3.3700772544245	-1.28846966194722	0.258332479992046	0.82466059431363	-4.58104669866205
Q13685	AAMP	-0.0894337311102609	3.33140172631726	-1.67777282578726	0.159035623617043	0.822903519863698	-4.58109594719351
Q13303-5	KCNAB2	0.168256894805842	3.26486978559635	1.4150466651098	0.220786806821206	0.823070406111797	-4.58119388056758
Q9Y697	NFS1	-0.0829445254487394	3.29135223499751	-1.63258626465258	0.168270994416193	0.822903519863698	-4.58124053720777
Q8NEZ3-1	WDR19	0.0772429077180945	3.30253004486409	1.74188370819293	0.146808752389883	0.822903519863698	-4.58160205905404
P17096-3	HMGA1	-0.0924746955244954	3.32414072205957	-1.52372531998691	0.192793144552217	0.822903519863698	-4.58209093619444
Q9H5I1	SUV39H2	-0.11872949855609	3.31120927114399	-1.34262413207897	0.241582365192196	0.82466059431363	-4.58280483149451
P09493-5	TPM1	0.159500175631245	3.28314861224647	1.23976300911279	0.27431787354688	0.82466059431363	-4.58286337925376
Q96SL8	FIZ1	-0.142924076639176	3.29583180169311	-1.19031697909889	0.291472425249132	0.826388214615994	-4.58300828089912
Q5EBL2	ZNF628	-0.255182473573083	3.29366506094339	-1.12576606208838	0.315325716054921	0.826388214615994	-4.58314103203779
Q92569	PIK3R3	-0.240914190396634	3.34463266958411	-1.12422271528108	0.315916737350111	0.826388214615994	-4.58346797851592
Q15427	SF3B4	-0.144447598165874	3.31849515044078	-1.4853679247567	0.20225257118997	0.822903519863698	-4.5834955579369
Q96FC7	PHYHIPL	0.0934155284195708	3.33003611156983	1.72749645639377	0.149466311572799	0.822903519863698	-4.58352516474627
Q5JSZ5-1	PRRC2B	0.0770603383746788	3.29789839513169	1.95830194090895	0.112240505108378	0.822903519863698	-4.58369768816473
Q13352-5	ITGB3BP	-0.217261992970055	3.31349708608374	-1.23607431494496	0.275564980049163	0.82466059431363	-4.58371369396957
Q9BQ04	RBM4B	-0.0958475547668359	3.32394879862062	-1.76623098250815	0.142421369460312	0.822903519863698	-4.58396119668524
Q8TC05	MDM1	0.196326834939268	3.26564934822811	1.16025003302153	0.302373955131274	0.826388214615994	-4.58498579228087
P11476-1	RAB1A	0.0892625108501116	3.33246532495234	1.86957552308376	0.125254489970086	0.822903519863698	-4.58532322197768
P35610	SOAT1	-0.116006771237465	3.31032264259147	-1.29919620020595	0.25493050434672	0.82466059431363	-4.58532976010757
Q8IY45	AMN1	-0.142865414716636	3.32677160677638	-1.24409458852515	0.27286004546396	0.82466059431363	-4.5855203196028
O60488-1	ACSL4	0.0863650831482999	3.31772577908066	1.67096229335465	0.160394023424047	0.822903519863698	-4.58602299010675
Q9BSJ6	FAM64A; PIMREG	0.095900646817241	3.3514652611766	1.54792764652477	0.187050539425481	0.822903519863698	-4.5861198016931
Q9ULF5	SLC39A10	0.109889641612698	3.31868325436375	1.44373759654359	0.213033717568647	0.822903519863698	-4.58696735290155
P56179-3	DLX6	-0.131246464469588	3.32613094710216	-1.25306363183585	0.269864116375718	0.82466059431363	-4.58704502475919
Q9Y478	PRKAB1	0.111399063366395	3.31122635083679	1.49213743326934	0.200550603776784	0.822903519863698	-4.58718709734698
Q06587	RING1	0.101210222134467	3.31575871752464	1.35862709975487	0.236832327686268	0.82466059431363	-4.5877578630639
P21554	CNR1	0.223914885168642	3.31765207974614	1.11243007891481	0.320465125505999	0.827842993394977	-4.58797386399899
Q8WTV0-2	SCARB1	0.10358863800282	3.3100256888833	1.42681370912209	0.217574559594339	0.822903519863698	-4.58804496663987
Q5SXM8	DNLZ	-0.182224596738276	3.29624043309736	-1.16964897029569	0.298927328982727	0.826388214615994	-4.58848197544738
Q9H0C8	ILKAP	0.144074379425358	3.31160970279187	1.78184578790848	0.13967881021561	0.822903519863698	-4.58858430799268
Q01082-3	SPTBN1	0.163835353572071	3.27012499783925	1.21101791413982	0.284174836819299	0.82466059431363	-4.58903592927502
Q5SR56	HIATL1; MFSD14B	-0.206055487829221	3.28789496599344	-1.1965937965109	0.289241912221969	0.82466059431363	-4.58940544910767
Q86XZ4	SPATS2	0.115588620282218	3.32166005078485	1.59725393765878	0.17586767729692	0.822903519863698	-4.58957133846362
A2RU54	HMX2	-0.348839024261425	3.35684577812096	-1.08761911481843	0.330223197457471	0.832465748680289	-4.58957638498851
Q9UKA2	FBXL4	0.229425207855977	3.24148101127567	1.11014650879237	0.321352538777327	0.82800929693157	-4.58970363028798
Q69YQ0-1	SPECC1L	0.103056455534054	3.31935950339474	1.83169567833587	0.131282887204996	0.822903519863698	-4.59004095658182
Q6BDS2	UHRF1BP1	0.0600054801348072	3.31330536512927	1.72606220639433	0.149733927816045	0.822903519863698	-4.59024072675542
Q9Y6E0	STK24	0.0848247753135705	3.31727816656904	1.68403331452806	0.157797240235876	0.822903519863698	-4.59087819789652
Q9NWS1-1	PARPBP	0.177300761440692	3.30658576341933	1.21485639070661	0.282840101803922	0.82466059431363	-4.59102725920685
Q15287-1	RNPS1	0.0904629626066355	3.31528100263446	1.6648947553683	0.161614141310766	0.822903519863698	-4.59126603766851
Q4KMQ2-2	ANO6	0.0844358003173447	3.30489773789681	1.67644732894877	0.159299083226428	0.822903519863698	-4.59186810751339
P02458-2	COL2A1	0.111451013292552	3.3064453320678	1.29995821820464	0.254690427713401	0.82466059431363	-4.59191920591364
P20337	RAB3B	0.352316084621926	3.22658743315664	1.09561162887775	0.327051716546691	0.831917896562274	-4.59194239063762
Q9H9P5-1	UNKL	0.131853725081969	3.28245593099688	1.25170583620827	0.270315702188281	0.82466059431363	-4.59250590433253
Q9Y2M5	KLHL20	0.119427308343571	3.30288124951515	1.23406177355311	0.276247593243199	0.82466059431363	-4.59286787715879
Q86Y97	SUV420H2; KMT5C	-0.187292324699135	3.29319759558723	-1.09393711017583	0.327713961440182	0.832133016285113	-4.59333281687977
Q9UGN5-1	PARP2	-0.0622435649956899	3.32941204132536	-1.66702428986979	0.161184846255524	0.822903519863698	-4.59383140966286
P23975-2	SLC6A2	-0.18484540402589	3.30364209869477	-1.1158885127447	0.319125263395081	0.827442673611632	-4.5943768828404
Q86VU5	COMTD1	0.377692347794647	3.22739436835538	1.07025062237087	0.337207714124103	0.832465748680289	-4.59459920579559
Q8N668	COMMD1	-0.212427520920179	3.33020681634342	-1.27059507011639	0.264095727750215	0.82466059431363	-4.59513486725373
Q96BZ8	LENG1	0.134458688261273	3.29748652071448	1.25979066449685	0.26763705697004	0.82466059431363	-4.59548053598411
O60683-2	PEX10	-0.183456722871447	3.37858301235078	-1.09269266432997	0.328206879331308	0.832333888725059	-4.59563116677774
Q9Y4C5-1	CHST2	0.120826246008854	3.31177106074908	1.23629768729058	0.275489312321094	0.82466059431363	-4.59604876882771
Q8WWM9	CYGB	0.103948668695609	3.32822665999466	1.40598529587302	0.223291569161003	0.82466059431363	-4.59621211476629
P42694	HELZ	0.0799662594774744	3.31063260031489	1.74351119108426	0.146511195381215	0.822903519863698	-4.59658576960772
P21579	SYT1	0.0519638317989914	3.31155975480193	1.82354672523995	0.132618762419293	0.822903519863698	-4.59684419411785
O94952-2	FBXO21	0.0942228759106937	3.31265064456183	1.52578271956817	0.192298267321318	0.822903519863698	-4.59737984862475
Q92542-1	NCSTN	0.133727098687982	3.32420580151171	1.29648048581609	0.255787824120057	0.82466059431363	-4.59809165902444
P62745	RHOB	-0.310572225814996	3.3380989786195	-1.23837075142926	0.274787969305767	0.82466059431363	-4.59834804794102
Q6PH81-1	C16orf87	-0.135214805493467	3.30321274242117	-1.15440829843783	0.304534061205367	0.826388214615994	-4.59971177337287
Q9H813-2	TMEM206	0.117344532229852	3.29558219033102	1.32408260487594	0.24719871572797	0.82466059431363	-4.59999756925747
Q86WR0	CCDC25	-0.176009954438136	3.3379596552424	-1.6218746401433	0.17053855620771	0.822903519863698	-4.60011832008184
Q5QP82	DCAF10	-0.151368927951331	3.30141089464269	-1.44201154800914	0.213492592621127	0.822903519863698	-4.60060770394933
Q99504	EYA3	0.136373178006468	3.31807774047404	1.21685064393846	0.282148910878057	0.82466059431363	-4.60107105349023
Q9BSW2-2	EFCAB4B; CRACR2A	-0.401748939392534	3.30241204782376	-0.871715608925042	0.426337535616877	0.857092786393412	-4.60155544047403
P21675-4	TAF1	0.0801408662961942	3.32230926354911	1.79793620791896	0.136909683631184	0.822903519863698	-4.60171207108713
Q86XP1	DGKH	-0.131266686695864	3.29330560699556	-1.47846116576668	0.20400362714927	0.822903519863698	-4.60200725164436
Q9NX04	C1orf109	-0.147115365585987	3.33514937566429	-1.14478529384035	0.308122478701466	0.826388214615994	-4.60223143282613
O15169	AXIN1	0.15307755762323	3.29136831651784	1.26654733114472	0.265417322324629	0.82466059431363	-4.60223455867866
P60510	PPP4C	-0.0808434674808788	3.30789574789057	-1.56550883040803	0.182985658462443	0.822903519863698	-4.60307360443139
Q7Z3D4	LYSMD3	-0.172130164089226	3.37839590506715	-1.07418606836567	0.335613973285114	0.832465748680289	-4.60314478284112
Q9BYE7-1	PCGF6	-0.100609128310071	3.34853808271506	-1.35891142792501	0.236748740353988	0.82466059431363	-4.60366888616444
O95229	ZWINT	0.0880743775467963	3.32058714544398	1.4448828463318	0.212729778101508	0.822903519863698	-4.60386599593527
Q96J42-1	TXNDC15	-0.118696498742608	3.30308710452302	-1.19785888086698	0.28879423455319	0.82466059431363	-4.60476688495432
Q8N8Y5	ZFP41	-0.187501090380813	3.28369576640671	-1.03770976632316	0.350638187660658	0.837286393458414	-4.60477520229448
Q93015-2	NAT6	-0.241092233720363	3.29453332904742	-0.985155764091762	0.373291743806966	0.846203862237109	-4.6050245469204
Q9NTG7	SIRT3	-0.123751533634754	3.29593523018931	-1.21640158986225	0.28230441442104	0.82466059431363	-4.60581856411314
Q96LD8	SENP8	0.156707880463725	3.30390685232808	1.14636958634168	0.30752911247433	0.826388214615994	-4.60602305841549
O95755-1	RAB36	-0.187724517123447	3.31485594319462	-1.06421790776522	0.339663521043	0.833681952069867	-4.60648683022194
Q6IAA8	LAMTOR1	0.0848408129799398	3.33026532192316	1.50629913438044	0.197035456201708	0.822903519863698	-4.60671116975874
Q8WVF1-1	OSCP1	0.107087076699998	3.2823769432196	1.23862491657043	0.274702095201463	0.82466059431363	-4.60694760083081
Q8IXV7	KLHDC8B	-0.203029984944804	3.33091144340122	-1.03648010941182	0.351154579510015	0.837286393458414	-4.60769108829157
Q8IYH5-1	ZZZ3	0.0932943415299827	3.31946971939802	1.62695553944176	0.169459161518892	0.822903519863698	-4.60828134479031
Q70CQ1-1	USP49	-0.215100649979391	3.36627926161971	-1.01592740849693	0.359882120785893	0.840013173385691	-4.60828935658589
P42025	ACTR1B	-0.175349938541621	3.35033430787472	-1.22309153830655	0.27999583362448	0.82466059431363	-4.60855509134117
Q8N4J0	C9orf41; CARNMT1	0.146414015342879	3.27002130108832	1.11807119160747	0.318282198786976	0.827057484129748	-4.60858400023015
P15374	UCHL3	-0.162852578672548	3.33254682198104	-1.57478449631975	0.180876612100911	0.822903519863698	-4.60878501617506
Q9GZQ3	COMMD5	-0.16168822085161	3.34711233110999	-1.20075470059406	0.28777185344133	0.82466059431363	-4.60886234564528
Q96SB3	PPP1R9B	0.105284797325551	3.31266475356813	1.53058486409894	0.191148060532376	0.822903519863698	-4.60939096390362
Q08AM6	VAC14	0.0774636444649088	3.32311916906557	1.64129278980965	0.166450296680127	0.822903519863698	-4.60951960560375
Q9H2S9	IKZF4	-0.112944117229386	3.27730871703198	-1.21716684616234	0.282039459737097	0.82466059431363	-4.60956264437462
Q9HCK8-1	CHD8	0.0645285214834204	3.32244537436207	2.03671724077702	0.101925249983703	0.822903519863698	-4.6097586643722
Q4V9L6	TMEM119	0.106962156413654	3.32334180066453	1.25813071820021	0.268185015421549	0.82466059431363	-4.60997458417244
Q9Y657	SPIN1	0.121910211812774	3.32150957754102	1.58270154696975	0.179095666911996	0.822903519863698	-4.61057395232451
P58335-4	ANTXR2	0.080793277574189	3.33236478176513	1.40007574902371	0.224939810032525	0.82466059431363	-4.61076589696466
P49842-1	STK19	-0.192347828628714	3.32252436205019	-1.01274877440527	0.361248213168373	0.840013173385691	-4.61105916676094
O14776-1	TCERG1	0.0909248306631358	3.33284757196045	1.8957040118684	0.12126519724503	0.822903519863698	-4.61118109011029
P98172	EFNB1	0.101354510349244	3.31973821717186	1.26497905291748	0.265931015267083	0.82466059431363	-4.61137650332257
Q7Z4W1	DCXR	-0.105942713182624	3.30931920156631	-1.56535350886508	0.183021182309056	0.822903519863698	-4.611789586542
P55211-1	CASP9	-0.105773320716488	3.32851133538716	-1.33416290746964	0.244130199736562	0.82466059431363	-4.61186306640064
Q9UBP9	GULP1	0.0746479926504557	3.30405899467101	1.57712732367841	0.180347758335697	0.822903519863698	-4.61233799717594
Q9BXJ3	C1QTNF4	-0.265076089032741	3.33282184519089	-0.554381489205726	0.605076143565877	0.912645089791084	-4.61246046841739
Q8IXW5	RPAP2	0.109273597420425	3.31865195915867	1.37699144860688	0.231490873928278	0.82466059431363	-4.61270780105432
Q92922	SMARCC1	0.0836442167139938	3.3245341040258	1.89312431760918	0.121653080509961	0.822903519863698	-4.61284193503824
O60664-1	PLIN3	0.135840524190371	3.30499741964638	1.57750241196926	0.180263231860833	0.822903519863698	-4.61299093401827
Q6ZTN6-3	ANKRD13D	-0.245833776904008	3.32469558226684	-0.927496331877286	0.399538572251014	0.848465680760785	-4.61302634540647
Q8NCJ5	SPRYD3	-0.170684637798006	3.35490458652774	-0.311471738198319	0.769002514148	0.955984137598094	-4.61315592195625
Q8IUR7-1	ARMC8	0.109627435849981	3.31019802596777	1.56803662082293	0.182408487508815	0.822903519863698	-4.61318159548999
Q9H6V9-2	C2orf43; LDAH	0.0956112751864059	3.30607959058872	1.39924155052742	0.225173417606899	0.82466059431363	-4.61344453666493
Q8WUF5	PPP1R13L	-0.326855319660128	3.29202313640564	-0.781860294202478	0.472443412013776	0.87116710652993	-4.61348000824036
P12270	TPR	0.134517977590878	3.32113862998378	2.31193896024338	0.0730442695654282	0.822903519863698	-4.61348568953061
Q15906	VPS72	0.10325869343181	3.31268267510635	1.32035615704142	0.24834225412565	0.82466059431363	-4.61356127982888
O43295	SRGAP3	0.0957600245611269	3.30891189688728	1.62665280573827	0.169523281686623	0.822903519863698	-4.61399210360853
Q96CX2	KCTD12	0.132195598837642	3.30681183830966	1.47036122480849	0.206076086258219	0.822903519863698	-4.61432138378244
Q9NX05-1	FAM120C	0.0837677362733373	3.26665547771909	1.45220894593777	0.210795437241386	0.822903519863698	-4.61444633698286
Q9NUG6	PDRG1	-0.185953299416108	3.31461595379822	-1.41208252913643	0.221603165046347	0.823510997239241	-4.61449013850113
Q9NX07-1	TRNAU1AP	-0.133671637739173	3.34920511312879	-1.11822868542162	0.318221442580108	0.827057484129748	-4.61465486291914
O00592	PODXL	0.100747390360952	3.33401779021499	1.29568785289767	0.256038557324476	0.82466059431363	-4.61471059041611
Q9BXB4	OSBPL11	0.101355588437081	3.30834397536278	1.62812723430509	0.16921122209814	0.822903519863698	-4.61527853277446
Q9UIY3	RWDD2A	0.194552979406929	3.30986383488514	1.02556343702539	0.355767550807995	0.840013173385691	-4.61535574633363
P78318	IGBP1	0.115900288947825	3.3195224588159	1.41592003422251	0.220546824201606	0.823070406111797	-4.61550373525308
A8MWY0	KIAA1324L	0.0883199247793966	3.30415785107976	1.53588269243814	0.189887019694502	0.822903519863698	-4.61565614225931
P78395	PRAME	0.0759188316015479	3.29486050835946	1.51659133068961	0.194518878118581	0.822903519863698	-4.61591029114092
Q15797	SMAD1	-0.133107300986651	3.33939766429792	-1.28311078401309	0.2600479115603	0.82466059431363	-4.61595808055028
Q92600-2	RQCD1; CNOT9	0.0937179996661207	3.32970028624869	1.5034933797033	0.197727042412676	0.822903519863698	-4.61609136185583
Q9NPB6-1	PARD6A	-0.25322371235158	3.26641142777072	-0.678846243619449	0.529738714490361	0.885339198797815	-4.61619086284039
O43172-1	PRPF4	-0.315166242030822	3.36305642918518	-1.82863346964505	0.131783234863292	0.822903519863698	-4.61637583656753
Q4G0I0	C16orf91	0.142935462549983	3.16898408486487	1.17461187456915	0.297121698675232	0.826388214615994	-4.61651391096869
Q8N6V9	TEX9	0.151218149153704	3.30284081347341	1.0552080251607	0.343360062796444	0.834271814880837	-4.61674971706435
Q9Y3M8-1	STARD13	0.199370038268985	3.28771289230531	0.944423756295198	0.391680607405694	0.847102475386228	-4.61695449048479
Q9P2C4	TMEM181	0.100061563120763	3.3175303581193	1.32856969311274	0.245828345735092	0.82466059431363	-4.61721509149257
Q13158	FADD	-0.126533118969896	3.30951549442418	-1.19622295165938	0.289373263094005	0.82466059431363	-4.61742550594944
O14949	UQCRQ	0.166887109675815	3.26233661663948	1.28690367991115	0.258832672099598	0.82466059431363	-4.61744947151657
Q96GX1-1	TCTN2	-0.143911496124414	3.31068237907741	-1.14547400867407	0.307864408476987	0.826388214615994	-4.61755699593602
Q15018	FAM175B; ABRAXAS2	0.090176239546392	3.30873434867349	1.46474809694265	0.207524314613379	0.822903519863698	-4.61821086511497
Q9H4Z2	ZNF335	0.125142512168758	3.31068422821202	1.15065675048375	0.305928548272746	0.826388214615994	-4.61851894816338
Q9NXF7	DCAF16	-0.160286688681293	3.32771689048277	-1.41082609245068	0.221950079902522	0.823764855773562	-4.61860051460004
Q9GZM3-2	POLR2J2; POLR2J3	-0.208194082883005	3.28545989925675	-1.04357329815714	0.348184738341476	0.836679136748182	-4.61867880610591
Q9NS87	KIF15	0.122031218797276	3.31209574894921	1.96512750908099	0.111300155627151	0.822903519863698	-4.61878936772476
Q9Y242	TCF19	-0.226680933782454	3.32858986976152	-0.871685067498526	0.426352590475001	0.857092786393412	-4.61897867159913
Q9BPZ7	MAPKAP1	-0.09311628488215	3.3160184408776	-1.49011771227115	0.201056920108589	0.822903519863698	-4.61925192852518
P60981-1	DSTN	-0.120595751132442	3.31938356936462	-1.76022385095796	0.143491172960444	0.822903519863698	-4.61925671265789
Q9UPQ4	TRIM35	0.246068035475053	3.25346630378326	0.878391749000233	0.423056696969659	0.857092786393412	-4.61943165999175
P30825	SLC7A1	0.114464632978658	3.31637915779271	1.20113659753758	0.28763726888008	0.82466059431363	-4.61967088527458
Q96B54	ZNF428	0.135909477421363	3.30550184187513	1.09288525969857	0.32813055101175	0.832333888725059	-4.61974328790152
Q5VWN6-1	FAM208B	0.0764629738238551	3.32986964155147	1.96517579417953	0.111293533174494	0.822903519863698	-4.61982999726218
Q9UKU6	TRHDE	-0.195975884012214	3.30274239270969	-0.917745240084187	0.40412304157724	0.850085582004153	-4.62020985563697
Q7L0J3	SV2A	0.115857997126212	3.3144596672962	1.32321061405967	0.247465858823634	0.82466059431363	-4.6203025016798
Q86XJ1	GAS2L3	-0.225319464561874	3.30073977956362	-0.576762274950084	0.591054986134085	0.907255852528361	-4.62034791332238
O00423-3	EML1	0.0685187934946771	3.30460549858504	1.60778294500483	0.173568530536314	0.822903519863698	-4.62051449799525
Q86VV8	RTTN	0.106019841577544	3.32525049501649	1.63520819197345	0.167720596672754	0.822903519863698	-4.62055658381763
P62888	RPL30	-0.163382222801234	3.33472933972046	-1.70461268194697	0.153795146345016	0.822903519863698	-4.62073525570294
P78537	BLOC1S1	-0.0901551240963397	3.3185839827983	-1.33142460774242	0.244960181097299	0.82466059431363	-4.62076566018322
Q6PK18-1	OGFOD3	-0.121885840973839	3.31991798206231	-1.2160662090983	0.282420604942723	0.82466059431363	-4.62103369656748
Q71SY5-3	MED25	0.119925563269968	3.32078935231077	1.23614622831577	0.275540617198765	0.82466059431363	-4.62167364893225
Q15937	ZNF79	0.0342652263831325	3.31110774380611	0.0738665874277195	0.944206994026177	0.992535688411937	-4.62170059066566
O43309	ZSCAN12	0.143543174429361	3.35974015595377	0.327045132496969	0.757927114607697	0.954874599495547	-4.6218546277743
Q68D20	PMS2CL	0.0668450987570105	3.28570004546676	0.141839575303036	0.893182371246902	0.983330651165139	-4.62217433069984
Q08345-5	DDR1	-0.216161332173639	3.37661707782806	-0.970439606160837	0.3798511329726	0.846987513658416	-4.62254706211328
Q92576-1	PHF3	0.120102233208568	3.32702203804132	2.04723546546017	0.100620148250042	0.822903519863698	-4.62257312799497
Q8TCF1-1	ZFAND1	-0.182568465793016	3.30157502684579	-1.03034206051384	0.353741966812809	0.838439873571673	-4.62322448100349
P00734	F2	0.104546890848014	3.33551704804064	1.38462460489532	0.229304703768461	0.82466059431363	-4.62323216410959
Q0VDD7	C19orf57	0.103578027527035	3.31452965556611	1.29643303120152	0.255802828950186	0.82466059431363	-4.62346531822461
Q9NUM4	TMEM106B	0.124519684174756	3.28649910817852	1.25558802380752	0.269026387284434	0.82466059431363	-4.62365384185067
O14965	AURKA	0.101256631599494	3.36976796897488	1.51750582302523	0.194296810936807	0.822903519863698	-4.62370481075684
O75419-3	CDC45	0.0873169233622533	3.30753560329888	1.53798196310885	0.189389611564269	0.822903519863698	-4.62420760103056
Q9NZ63	C9orf78	0.0960619701759767	3.313206560503	1.74512720839891	0.146216346959114	0.822903519863698	-4.62445306355583
A6NCE7	MAP1LC3B2	-0.222951118184976	3.33258267994356	-1.32776053644157	0.246074933775115	0.82466059431363	-4.62461497597027
Q9NQ31-1	AKIP1	0.157379020317779	3.28158666954031	1.04197999788204	0.348849955826608	0.837286393458414	-4.62494726339107
Q9BQ89	FAM110A	-0.165880065251711	3.35452347371336	-1.0736165897198	0.335844190249187	0.832465748680289	-4.62498262749077
Q96G03	PGM2	0.109483732363937	3.32466544019113	1.79279985529893	0.137787421368964	0.822903519863698	-4.62501416949201
Q9NZC7	WWOX	0.0980773660328222	3.30507393876875	1.45385161412697	0.210364069456274	0.822903519863698	-4.62511267184645
Q8NC42	RNF149	-0.167897107017936	3.30790874686342	-1.19613305489713	0.289405112102361	0.82466059431363	-4.62516644810727
Q6NSZ9	ZNF498; ZSCAN25	-0.122801777101686	3.30132065907727	-1.13246909703465	0.312770156708662	0.826388214615994	-4.62517689490879
P51511	MMP15	-0.107154032024076	3.32525314236495	-1.2476767675458	0.27165982964769	0.82466059431363	-4.62533972767728
Q9P286	PAK7; PAK5	0.11214829897765	3.30165496366044	1.25061498469157	0.270679011147337	0.82466059431363	-4.62534452694995
Q86V85	GPR180	-0.15675577948011	3.27130199182711	-1.07162622030176	0.336649892336877	0.832465748680289	-4.62569068514725
Q13595-1	TRA2A	0.106200109688167	3.31873698237144	1.2973979350215	0.255497894647459	0.82466059431363	-4.62592002660949
P98175-1	RBM10	0.0820942037298944	3.31138742884026	1.81660660070543	0.133767596028481	0.822903519863698	-4.62600177169651
P09497-2	CLTB	0.0871131881243444	3.33527746939313	1.46545344338354	0.207341785928776	0.822903519863698	-4.62614288063062
P29558-2	RBMS1	0.100457805958652	3.30900918447518	1.6203757264149	0.170858307410667	0.822903519863698	-4.6264235731193
Q9BVP2	GNL3	0.102783186653525	3.34731109475986	1.76893166535785	0.14194308657771	0.822903519863698	-4.62692930481757
P43357	MAGEA3; MAGEA6	-0.187108483364421	3.41640618339276	-0.906368164571623	0.409525573427036	0.852463177559046	-4.62711578040392
Q16762	TST	-0.11601880652984	3.28033528176872	-1.24040544580498	0.274101204397441	0.82466059431363	-4.62726597811606
Q5BKT4	ALG10	-0.10788706151523	3.29500532593735	-1.21281278386567	0.283550001690611	0.82466059431363	-4.62738144768028
Q10472	GALNT1	0.110565477190026	3.29732256160179	1.4473960226514	0.2120642779572	0.822903519863698	-4.62752699489403
O95967	EFEMP2	0.201359576905157	3.31879349464162	0.767149594791213	0.480336849528303	0.874646781756829	-4.62753233038456
P51659-1	HSD17B4	0.060501066472607	3.33431521155969	1.84792796933301	0.128663410070453	0.822903519863698	-4.62753885974157
Q92753-1	RORB	0.119962479252172	3.3162513226658	1.33801871479829	0.242966006374873	0.82466059431363	-4.62799189882746
Q9NZV5-1	SEPN1; SELENON	-0.161099660321232	3.24360817346574	-0.999324692961242	0.36706594866542	0.841754512009575	-4.62801677794777
Q9BZ67	FRMD8	-0.173998040808886	3.31175014573648	-1.14615359355994	0.307609948351985	0.826388214615994	-4.62810664208288
Q8IVF2-1	AHNAK2	0.202269721287819	3.31738273175245	0.745436295017338	0.492164354053268	0.878125097929061	-4.62818315500697
P78381-4	SLC35A2	0.144219808175199	3.31599047570494	1.08275361433142	0.332166981686107	0.832465748680289	-4.62820698570906
P82979	SARNP	0.0658175553791392	3.33499124621652	1.60354377217779	0.174490563385191	0.822903519863698	-4.62832237893576
Q9BT09	CNPY3	0.0834466464242513	3.35547230592706	1.51306136271133	0.195378413665912	0.822903519863698	-4.62861863872071
Q9H7B2	RPF2	0.188700501772499	3.30414727338315	1.42801833652009	0.217248272051016	0.822903519863698	-4.62865989015476
P11310-2	ACADM	-0.106316353747275	3.2977732378831	-1.84168262226329	0.129664754148112	0.822903519863698	-4.62872058731856
Q13367	AP3B2	0.110720383882414	3.30242345099287	1.66583331351733	0.161424793761011	0.822903519863698	-4.62897849371168
Q9UGJ0	PRKAG2	-0.195197972851432	3.29940549159044	-0.733690916967012	0.498649675784013	0.880980259886384	-4.62987717715831
Q96JX3-1	SERAC1	-0.176153526600517	3.30054365705609	-0.528935689592839	0.621259974686061	0.919825055844231	-4.63014133300377
P63096-1	GNAI1	-0.205315218497745	3.31884287554066	-1.25058602173936	0.270688663422026	0.82466059431363	-4.63026052067966
Q16645-1	FKBP1B	-0.196985795709837	3.27169469348161	-0.711826874400694	0.510884882117424	0.882822632116677	-4.63027988017291
P16989-1	CSDA; YBX3	0.188878361056229	3.28848108025719	1.19682706922779	0.289159316246898	0.82466059431363	-4.63058444424713
Q6PIW4	FIGNL1	-0.101735090712881	3.3213051373094	-1.59988680455783	0.175289909734425	0.822903519863698	-4.63065239281495
P49840	GSK3A	0.132692299752784	3.31726510668118	1.4640239633826	0.207711868040131	0.822903519863698	-4.63068980865854
Q9Y3R0	GRIP1	0.0948628193597244	3.27789020737802	1.60780412669332	0.173563935748677	0.822903519863698	-4.63120028350713
Q3KRA9-2	ALKBH6	-0.123932070151803	3.33351940612437	-1.11234695440829	0.320497390438465	0.827842993394977	-4.63129748249646
Q5T6X4	FAM162B	0.133741016652855	3.28334970432097	1.07155976546105	0.336676822179881	0.832465748680289	-4.63158659330316
Q9BY27	DGCR6L	0.15687010529809	3.25935133692381	1.16835467555002	0.299399846610974	0.826388214615994	-4.63195275959419
Q93009	USP7	0.144763347078006	3.32919704162449	2.01222434281286	0.105034676412792	0.822903519863698	-4.63197571250837
Q08495-1	DMTN; EPB49	0.193620825195901	3.21569199155627	0.552610052884014	0.606194505641214	0.912817809804812	-4.63203189313111
Q9Y6D5	ARFGEF2	0.0813912629877551	3.31478361528988	1.92277042012337	0.117272822260257	0.822903519863698	-4.63210030755687
Q15005	SPCS2	-0.101322856860471	3.30202280567258	-1.53300077499408	0.19057197746559	0.822903519863698	-4.63237076290032
Q13144	EIF2B5	0.0703491750281175	3.31450513686428	1.67208290838356	0.160169703606331	0.822903519863698	-4.63239096006884
Q53HC9	TSSC1; EIPR1	-0.147111949331595	3.31780730141166	-1.33347446722004	0.244338616261331	0.82466059431363	-4.6327161918044
[truncated: 6,337 more rows]
