# Supplementary material for: Thalidomide promotes degradation of SALL4, a transcription factor implicated in Duane Radial Ray syndrome
Source: eLife journal article supplement (doi:10.7554/elife.38430), 2018-08-01
Supplement: supp [file elife-38430-supp-v1.zip › elife_poa_e38430_Figure_1_source_data_12.csv]

	ID	logFC	AveExpr	t	P.Value	adj.P.Val	B
P15170-3	GSPT1	-1.0466183625323	3.13972560990871	-41.6941383710244	3.9357614619983e-07	0.000994002743127257	7.16287787715659
O60885-1	BRD4	-1.76547259437715	3.06667243137292	-61.2976377577006	6.65368295475543e-08	0.000554651011108413	6.91671416646931
P25440-2	BRD2	-1.53508378774839	3.07674530828553	-44.7065103595664	2.85343341070582e-07	0.000994002743127257	5.73147813783131
Q15059	BRD3	-2.29455593204612	2.87143484889227	-39.9913314310758	4.76968686721333e-07	0.000994002743127257	5.25509914069169
Q8IYD1	GSPT2	-1.98898626631033	2.92675857954385	-22.8093841810224	6.30844813355533e-06	0.00876453727355287	3.47214239651644
Q9BRJ7-1	NUDT16L1	-1.57853122044527	3.03011877855814	-25.5474936141127	3.74972056506479e-06	0.00625153412607602	2.90762458679514
Q9HBE1-1	PATZ1	-0.542439918374755	3.26053274927774	-12.4697076250921	9.86363343172741e-05	0.117461783266971	2.16588684634314
P11926	ODC1	-0.656602206244451	3.21079532684248	-11.9568721274622	0.000119162691049271	0.12416752407334	1.73922108919333
P62158	CALM3; CALM2; CALM1	0.802583452155369	3.55459695665365	10.2657810664687	0.000235837191711244	0.178721711827721	1.41500121925393
P04198	MYCN	-0.632377699735535	3.23380521998836	-10.7873760859597	0.000189045655209524	0.157588458182659	1.40324394549569
P62633-1	CNBP	0.556283168818548	3.35413094503508	10.0621280735237	0.000257839652364811	0.179112611842755	1.17558542735574
P24385	CCND1	-0.476787470387988	3.26146761194731	-8.62247780000465	0.000510230738149679	0.292244525138627	0.573246541180713
Q9H3W5	LRRN3	-0.634879720913567	3.27795265412442	-7.57611738234577	0.000896810053346717	0.404972866910835	0.0503922051124421
Q96JP5-1	ZFP91	-0.358121646581872	3.89962459703317	-7.4173216052059	0.000982767182492452	0.404972866910835	0.0333836828122136
P82675	MRPS5	-0.280470152766372	3.2508283512377	-7.35329598785313	0.00102020515896444	0.404972866910835	-0.0455998028623803
Q9BR77-1	CCDC77	-0.381021078947838	3.25012779918483	-7.1945722963518	0.00112066078991053	0.424628561122462	-0.0948584518468598
P49703	ARL4D	-0.860520647480555	3.21507862472499	-8.56335164722365	0.000525871866252329	0.292244525138627	-0.238385146517382
O95863	SNAI1	-0.783634121333239	3.1886382110462	-8.12154091468656	0.000663012085984692	0.345429296798025	-0.27888442523652
Q96QD9-1	FYTTD1	-0.830799257391109	3.23435717786746	-6.94881604378014	0.00130070827320999	0.451779340228271	-0.321744703634145
Q96T58	SPEN	0.204610294467747	3.34135771472764	7.50763853663575	0.000932722203293143	0.404972866910835	-0.329077031600701
Q9UJQ4	SALL4	-1.13123790771937	3.66419844067771	-9.52793846454143	0.000328482831066975	0.210633298444177	-0.404052650032716
Q06945	SOX4	-0.71847869125157	3.20933853033892	-7.51638458240768	0.00092804049309638	0.404972866910835	-0.464213136672278
Q9BWT1-2	CDCA7	-0.549610149860489	3.29692608046155	-6.79772235734611	0.00142869145562572	0.476382878963839	-0.4724466018198
P09001	MRPL3	-0.279097027954667	3.25109355358918	-6.64369968520842	0.00157501423428001	0.48627106136882	-0.505696943235689
O95185-1	UNC5C	0.359175449705755	3.34426276418163	6.35185319750134	0.0019047250096367	0.544053661106456	-0.685711265370128
O15226-2	NKRF	0.216907263399848	3.34235214839013	6.51613389832241	0.00170996088335124	0.509079782986283	-0.716136658337029
P82930	MRPS34	-0.365772517060496	3.25031500909082	-6.18783943974272	0.00212624230560133	0.544053661106456	-0.7302246899994
P24928	POLR2A	-0.283504904821264	3.27783494481628	-7.04394140181211	0.00122717059205673	0.444769306755867	-0.765665123699234
P50914	RPL14	-0.462275504550136	3.25980861124261	-6.00241737120699	0.00241487532477004	0.544053661106456	-0.82947756391664
Q9UJ04	TSPYL4	-0.520928298006832	3.24480341160378	-6.00883098249079	0.0024041388238524	0.544053661106456	-0.843666441011523
P49798-3	RGS4	-0.91176652639218	3.32025994204953	-6.6754825161762	0.0015434019105769	0.48627106136882	-0.875243762533468
Q9BYD2	MRPL9	-0.41218579768725	3.20481427121628	-5.94590277068383	0.00251199878416932	0.544053661106456	-0.889055034551022
Q13542	EIF4EBP2	0.483295371962303	3.39440094017907	5.63519433164039	0.00313738157486535	0.544053661106456	-1.13188541936684
Q8TEW6	DOK4	-0.425405120773612	3.24977375951075	-5.55951915854869	0.00331679469645368	0.544053661106456	-1.13489082168239
Q16836-2	HADH	-0.255785783364146	3.26331677268191	-5.64382851347602	0.0031176547133515	0.544053661106456	-1.18283288592362
Q02224	CENPE	-0.21645255446367	3.29387930619791	-6.01384916715396	0.00239577801683096	0.544053661106456	-1.21930689147684
P30291-1	WEE1	-0.287274686464025	3.27603908585278	-5.41576453190565	0.00369243063653075	0.544053661106456	-1.28192583563585
P55084	HADHB	-0.351506632831488	3.25622701823578	-5.63196147451839	0.00314480604248043	0.544053661106456	-1.29936061025574
Q02818	NUCB1	0.301949791198137	3.38059686907582	5.51595643927553	0.00342561248843255	0.544053661106456	-1.33054107374385
Q7L622	G2E3	-0.397726910744277	3.27115143676981	-5.26736129527883	0.00413451692911173	0.544053661106456	-1.34109965883863
Q9H2F5-2	EPC1	0.330901977799737	3.35374777049415	5.26713638094687	0.00413523319707834	0.544053661106456	-1.37793365717445
Q16875	PFKFB3	-0.24105232527006	3.29880247426318	-5.29990285021391	0.00403241953025092	0.544053661106456	-1.45352987592157
P62805	HIST1H4A; HIST1H4F; HIST1H4D; HIST1H4J; HIST2H4A; HIST2H4B; HIST1H4H; HIST1H4C; HIST4H4; HIST1H4E; HIST1H4I; HIST1H4B; HIST1H4K; HIST1H4L	-0.387404005710706	3.33675166118477	-5.20096109253152	0.00435252741601819	0.544053661106456	-1.49734987541247
P82933	MRPS9	-0.228501845977391	3.25120205271948	-5.3556283331466	0.00386445180868291	0.544053661106456	-1.50006575749085
Q8IXM3	MRPL41	-0.634893190877547	3.24929899357172	-5.04250273890293	0.00493036198360789	0.544053661106456	-1.51371407286189
Q14978-2	NOLC1	0.193977771030028	3.36100019416197	5.92681768931052	0.00254584594981585	0.544053661106456	-1.515250955178
Q9H211	CDT1	-0.401902869364044	3.28153464466012	-5.03156354177637	0.00497350784692708	0.544053661106456	-1.52673446425672
Q9BT17-1	MTG1	-0.394369080669377	3.26182309680812	-5.01283405404915	0.00504842316073076	0.544053661106456	-1.53016697420908
P36542-1	ATP5C1	-0.198958841960246	3.28111180336556	-5.37392230422356	0.00381113203996011	0.544053661106456	-1.5378070406085
Q7Z7H8-2	MRPL10	-0.429484169766405	3.27305338296923	-4.98662058760439	0.00515553055291298	0.544053661106456	-1.54506805986648
Q9H3L0	MMADHC	-0.630672654551387	3.29223439242699	-5.00932269361122	0.00506261650778346	0.544053661106456	-1.5495325094818
O14757	CHEK1	-0.317143832061155	3.29842485068998	-5.26663750959073	0.00413682244159333	0.544053661106456	-1.55033806028686
Q9H0H5	RACGAP1	-0.226841562280787	3.28180283006477	-5.31829260628817	0.00397604739725578	0.544053661106456	-1.56666683437404
O15015-2	ZNF646	0.340007085095946	3.28824236800482	5.07188499351719	0.00481665158911298	0.544053661106456	-1.58235814701615
Q7L0Y3	TRMT10C	-0.317672269101527	3.27696485590427	-5.31882709562948	0.003974423019866	0.544053661106456	-1.58454456330078
Q8TCZ2	CD99L2	0.340573006577189	3.41066610935529	4.85899389895363	0.00571708687263838	0.544053661106456	-1.6407194355268
P82932	MRPS6	-0.340051279267088	3.27805106599839	-4.84352051240484	0.00578997765626128	0.544053661106456	-1.65721058882585
P61587	RND3	-0.522403980208625	3.23968597073003	-4.92788911614651	0.00540543160097478	0.544053661106456	-1.66470755324314
P49411	TUFM	-0.190377810124464	3.27855488446936	-5.63568249551919	0.00313626228962053	0.544053661106456	-1.69230533570942
Q8WTP8-1	AEN	-0.36245061355162	3.27197549224148	-4.73453248133582	0.00633570897337516	0.544053661106456	-1.74189993812236
Q9P0M9	MRPL27	-0.317615190556238	3.24769953277473	-4.79205463209081	0.00604045106266778	0.544053661106456	-1.75155815228195
P82650	MRPS22	-0.24201731959862	3.24090559412066	-4.83620586208874	0.00582481720824792	0.544053661106456	-1.75334048931434
Q96IR7	HPDL	-0.510933589568885	3.29574185542906	-4.73691741472774	0.00632313317782987	0.544053661106456	-1.76184197691155
Q9Y6B2-1	EID1	-0.537607065799852	3.22838513232934	-4.78351316074712	0.00608324942420283	0.544053661106456	-1.76548581668583
Q9BRJ2	MRPL45	-0.223153426460534	3.27143389154898	-4.95485281219667	0.00528896131800213	0.544053661106456	-1.77002436091208
Q6KF10	GDF6	-0.648343683921039	3.39035066926539	-5.03045144672691	0.00497791912392079	0.544053661106456	-1.78344662765973
Q8TD30-1	GPT2	-0.357779412192971	3.27451039622877	-4.94705159835737	0.00532235071286686	0.544053661106456	-1.80438906909875
Q9C037-1	TRIM4	0.302531464390094	3.31768333095688	4.68481842989748	0.00660470132696726	0.544053661106456	-1.8080590927567
Q01484	ANK2	0.147647229684275	3.33068142838203	5.53887164252	0.0033678503404163	0.544053661106456	-1.81727165592382
O14813	PHOX2A	-0.172271958378977	3.30443871441484	-5.01291414645744	0.00504809996773614	0.544053661106456	-1.82191107366895
O43763	TLX2	-0.417408183001693	3.23864610961078	-4.64195355376394	0.00684751145973764	0.544053661106456	-1.82608998041022
Q5VV67-1	PPRC1	-0.353587794002422	3.27901075259964	-4.6437733559511	0.00683699127559132	0.544053661106456	-1.83348433492394
P42575-1	CASP2	-0.24964861217662	3.28618788050559	-4.7198875704798	0.00641358270168222	0.544053661106456	-1.84145101877102
O75439	PMPCB	-0.229588153219732	3.26160246798455	-4.98361255852116	0.0051679926197458	0.544053661106456	-1.87034380889926
Q8WVM7	STAG1	0.179644563044379	3.33970105301794	5.03573157203559	0.0049570159451498	0.544053661106456	-1.88506458174171
P48061-4	CXCL12	-0.454075455139281	3.27482811284139	-4.57480645147524	0.00724937913595461	0.544053661106456	-1.89861018317316
Q6P2D0-1	ZFP1	-0.411835115693393	3.28835904709798	-4.50620830602352	0.00768895838292194	0.544053661106456	-1.93466797346237
Q9BWG6-1	SCNM1; TNFAIP8L2-SCNM1	-0.277448642351877	3.26968566475689	-4.55620251680363	0.00736559898403398	0.544053661106456	-1.93817023494876
Q9NP50-1	FAM60A	-0.345899604739574	3.28337356168242	-4.456673344145	0.00802596179901412	0.544053661106456	-1.95444786444919
Q92610	ZNF592	0.252598214461866	3.33195184819761	4.59903538263793	0.00710124430284365	0.544053661106456	-1.96891655881213
Q5T6F0	DCAF12	-0.414194920885226	3.27045386298242	-4.41264116138289	0.00834020330305858	0.544053661106456	-1.98983362939341
Q9BVG3	TRIM62	-0.634535643351164	2.97448759669049	-4.76526762640194	0.0061758777217124	0.544053661106456	-2.00787585964674
Q15424-3	SAFB	0.165354743833971	3.35406401417417	5.27721311961479	0.00410328663037274	0.544053661106456	-2.01271475747049
Q8NBE8	PHOSPHO2-KLHL23; KLHL23	-0.493557446324669	3.24288841725395	-4.45605512731301	0.00803027632425256	0.544053661106456	-2.0184041460623
Q8N1G0	ZNF687	0.238930718753143	3.3336367583652	4.82833979180819	0.00586256014641189	0.544053661106456	-2.02316066638529
Q96CM3	RPUSD4	-0.287168184804573	3.2369614379297	-4.4278927540902	0.00822974683020694	0.544053661106456	-2.0520217475512
P35232	PHB	-0.246124906788666	3.28542132076703	-4.72141187976913	0.00640542475062512	0.544053661106456	-2.05226498218151
Q9Y3D9	MRPS23	-0.315368852189738	3.26880561157284	-4.35274428385874	0.00879120357520027	0.544053661106456	-2.06556446838257
O75616-1	ERAL1	-0.233169215937117	3.26786401282682	-4.48397590668891	0.00783811018061172	0.544053661106456	-2.06883636720011
Q9HCE3	ZNF532	0.216871810965223	3.3393389774001	4.89531371332241	0.00555021592352011	0.544053661106456	-2.07542768628149
Q8N3T6	TMEM132C	0.253356380732568	3.33824972808623	4.57047770880197	0.00727622693359343	0.544053661106456	-2.08383526551131
Q01664	TFAP4	-0.253439051003827	3.30902363739729	-4.46316774816115	0.00798080192796666	0.544053661106456	-2.09340057854813
P05166-2	PCCB	-0.251473658452127	3.27512122781758	-4.61144290022843	0.00702676816546679	0.544053661106456	-2.09745105205691
Q9Y3A2	UTP11L; UTP11	-0.519749132003589	3.25201232784292	-4.45352274413016	0.00804797829957798	0.544053661106456	-2.11417180047657
O14530	TXNDC9	-0.229525326028991	3.25848697324022	-4.35814735352484	0.00874936377482098	0.544053661106456	-2.15466627274627
Q9Y6Y0	IVNS1ABP	-0.265715613255215	3.28389083513023	-4.44178778964017	0.00813061031793772	0.544053661106456	-2.16443907907367
P49759-3	CLK1	-0.269313295282457	3.2970511523979	-4.39920074187156	0.00843899042775884	0.544053661106456	-2.16562111490418
Q6NVY1	HIBCH	-0.233195475348693	3.26273526410494	-4.55081897609785	0.00739963898382983	0.544053661106456	-2.18062999406571
Q13011	ECH1	-0.175988151476939	3.27470278251511	-4.5221742460822	0.00758390678003494	0.544053661106456	-2.18164278150892
Q9UQB3-1	CTNND2	0.213435281955571	3.32572268943957	4.50105637716651	0.00772322177007686	0.544053661106456	-2.21193464142378
Q9BYD3	MRPL4	-0.318612264368568	3.25757321798094	-4.3236986705578	0.00902019464629739	0.544053661106456	-2.217286482383
Q9BPZ3	PAIP2	0.442949879376041	3.33086804422575	4.13588157328226	0.0106821175525042	0.544053661106456	-2.21754221944958
Q96M94	KLHL15	0.292608036500164	3.34785462324274	4.23885969448016	0.00973026306889953	0.544053661106456	-2.22293780675664
O95503	CBX6	-0.437028940046374	3.31679437305169	-4.16442667325074	0.0104077429382187	0.544053661106456	-2.23034486291344
Q2M1K9	ZNF423	0.20657930221516	3.34039183879682	4.35881015002231	0.00874424740165257	0.544053661106456	-2.23201209738126
P10276	RARA	-0.360524717672082	3.25936826965306	-4.11568033511459	0.0108814150679351	0.544053661106456	-2.23292566546449
O60583	CCNT2	0.327622984223315	3.31559531590501	4.21364006324325	0.00995385047381515	0.544053661106456	-2.23354526936049
Q9H8V3-3	ECT2	-0.145432951708003	3.30032627671151	-4.73637921383474	0.00632596854275797	0.544053661106456	-2.23408819022081
O14965	AURKA	-0.290103217483437	3.27192800670414	-4.34769866284659	0.008830487837678	0.544053661106456	-2.24445106579599
Q9ULV3	CIZ1	0.249517172601696	3.35024644137708	4.50073523157454	0.00772536352576123	0.544053661106456	-2.25497093494171
Q9UDR5	AASS	-0.225018563069066	3.29666144129997	-4.55481068945026	0.00737438175683391	0.544053661106456	-2.2693947563858
P22830-2	FECH	-0.231029973970198	3.28073283424586	-4.3785479311908	0.00859348337319378	0.544053661106456	-2.27650609815913
Q9H9B1	EHMT1	0.127562555742289	3.34027396840881	4.80002913739827	0.00600081444682941	0.544053661106456	-2.27913847059915
P26440	IVD	-0.221183191430602	3.2616422813881	-4.38894310169736	0.00851531063801748	0.544053661106456	-2.29740974740345
Q9Y291	MRPS33	-0.322598222521187	3.2531369315239	-4.04444063262479	0.0116198240456908	0.544053661106456	-2.3068646146216
P29323-3	EPHB2	0.213376710893063	3.34518554433186	4.26742359696997	0.00948410449777475	0.544053661106456	-2.32096741304741
Q9BXS6	NUSAP1	-0.319726081860673	3.26701717300054	-4.42182622323482	0.00827347506843826	0.544053661106456	-2.32952487762379
P04181-1	OAT	-0.324454949693717	3.28967835677675	-4.33005085831714	0.00896952208500229	0.544053661106456	-2.33426931098624
Q9H9P8-1	L2HGDH	-0.272819598660462	3.23551644062584	-4.11982196933417	0.0108402029829601	0.544053661106456	-2.34092875951594
Q9H0R6-1	QRSL1	-0.2433151983606	3.28069983536871	-4.36827151772961	0.00867159355375098	0.544053661106456	-2.34221235460777
P56556	NDUFA6	-0.324743255443441	3.32237456770247	-4.07527741740267	0.0112932223675807	0.544053661106456	-2.34751815519554
P83731	RPL24	-0.366069560908788	3.27703862312324	-4.34708623768704	0.0088352700893388	0.544053661106456	-2.34859339480898
Q5JPH6-2	EARS2	-0.239278813984253	3.28075889525967	-4.14492823303885	0.0105942542967888	0.544053661106456	-2.3498069543639
Q9GZT3-1	SLIRP	-0.32602787383096	3.26291226352939	-4.28380822433104	0.00934620434820627	0.544053661106456	-2.35519818338962
O75319-1	DUSP11	-0.570690749018147	3.30094623906969	-4.03191567951473	0.0117556247237281	0.544053661106456	-2.35521305911255
O94927	HAUS5	-0.273791753932306	3.30233610816554	-4.19664884054488	0.0101078867480552	0.544053661106456	-2.3650283629183
P30038	ALDH4A1	-0.212529760979537	3.25842387559363	-4.37437067003211	0.00862513421856392	0.544053661106456	-2.37048570075651
P29084	GTF2E2	-0.197026519429046	3.29307337636737	-4.20899914966494	0.00999564845983784	0.544053661106456	-2.37323438159344
Q9UIJ7-1	AK3	-0.464754780384369	3.28045515858844	-4.21949642750176	0.00990139775824125	0.544053661106456	-2.39440499632398
Q13823	GNL2	-0.324617202047192	3.27628144338178	-4.46181988927111	0.00799014983540651	0.544053661106456	-2.40978441246411
Q99798	ACO2	-0.183995167884226	3.26715022612189	-4.66285177665663	0.00672783997151364	0.544053661106456	-2.41473174665743
Q96C36	PYCR2	-0.210781679908472	3.27325397674456	-4.11438576153324	0.0108943345626561	0.544053661106456	-2.42074650239645
P42766	RPL35	-0.381959231684035	3.30899707250433	-4.07397415670666	0.0113068064840765	0.544053661106456	-2.43571449116226
Q96J01	THOC3	-0.235646765345022	3.30352411647144	-4.28256278336909	0.00935660350001617	0.544053661106456	-2.43981518508654
P51826-2	AFF3	0.326303815873088	3.33734783573673	3.86372623654331	0.013771371093838	0.544053661106456	-2.45137184460838
Q9H898-1	ZMAT4	0.228208229856225	3.33248993825191	4.03006358293622	0.0117758629729149	0.544053661106456	-2.45621275927937
P42765	ACAA2	-0.163912290444259	3.27886756220024	-4.62438589184084	0.00695005741870279	0.544053661106456	-2.45759399436497
Q96A37-1	RNF166	-2.97078578167184	3.70202148643497	-11.2226596230829	0.000158373323800519	0.146688891911236	-2.46643640045062
P49821	NDUFV1	-0.25357591120837	3.2776603010448	-4.17552226739106	0.0103033265239871	0.544053661106456	-2.48006118635129
Q15699	ALX1	-0.408623266706713	3.28002780146776	-3.82982403106424	0.0142250199662043	0.544053661106456	-2.48483593565923
Q9BVI0	PHF20	0.193300846647598	3.3236284625645	4.17341973121809	0.0103230180917093	0.544053661106456	-2.48961862334337
O94880	PHF14	0.175928270624882	3.35889856300142	4.41539817034369	0.00832010773814744	0.544053661106456	-2.49060447075172
Q9UJJ9	GNPTG	0.349965523712334	3.37807985078838	3.80810716702968	0.0145247591369123	0.544053661106456	-2.49189648490813
P49406	MRPL19	-0.269658501883394	3.27331386255468	-3.9741085367548	0.0124069327576781	0.544053661106456	-2.49656894380639
Q9UGU0	TCF20	0.18524956815157	3.33148404505461	4.60814121740573	0.00704649620757274	0.544053661106456	-2.50049121952634
Q9BW66-3	CINP	-0.441960255265452	3.37589734216744	-3.80096248532213	0.0146249733370999	0.544053661106456	-2.50142485818224
P43004-1	SLC1A2	0.254823428753079	3.35279878529147	4.00264974101207	0.0120802334882909	0.544053661106456	-2.50186393439482
Q9UPT6	MAPK8IP3	0.197997481015083	3.35619117698981	4.29199202392112	0.00927820794819692	0.544053661106456	-2.50232507468282
Q9ULI0	ATAD2B	0.190213592222041	3.33101912503741	4.34783238771395	0.00882944402330455	0.544053661106456	-2.50534817052949
Q9UK61	FAM208A	0.218496974128937	3.33249742989996	4.33510703945182	0.00892942690301694	0.544053661106456	-2.50614910665654
P41227-1	NAA10	-0.174488685763858	3.28349049070084	-4.39292395198651	0.00848559583258702	0.544053661106456	-2.51811637312567
Q10713	PMPCA	-0.181856509988371	3.26107440238991	-4.21675659538965	0.00992589670392222	0.544053661106456	-2.54038277459368
P17026	ZNF22	-0.361963413133907	3.24926042408925	-3.78402614175508	0.0148657597593572	0.544053661106456	-2.54440512483253
Q8TAD4-1	SLC30A5	0.272788924103209	3.3305409619903	3.84320003136165	0.0140439862572702	0.544053661106456	-2.5505967569226
A6NHT5	HMX3	-0.414527724903053	3.28375795569625	-3.74867848420057	0.0153833112963928	0.544053661106456	-2.55209229238484
Q6PI98-1	INO80C	-0.388561305120093	3.28864109112596	-3.74313497981887	0.0154663640118982	0.544053661106456	-2.55475302808238
P17707-1	AMD1	-0.330781834642814	3.28067067150621	-3.73363517044643	0.0156099045401133	0.544053661106456	-2.55865121501099
O95872	GPANK1	-0.348808291268209	3.29174513192418	-3.76165403440241	0.0151909299476858	0.544053661106456	-2.5672728434791
Q9BYD6	MRPL1	-0.213762093406393	3.25297236020433	-4.04123636353882	0.0116543906870171	0.544053661106456	-2.57840517628568
Q02252	ALDH6A1	-0.21371945428461	3.26801998849489	-4.09235679116357	0.0111169538533227	0.544053661106456	-2.58865999690674
Q9NTX7	RNF146	0.325914078374867	3.33709793002059	3.70936838391135	0.0159836519145695	0.544053661106456	-2.58975175914406
P08708	RPS17; RPS17L	-0.17369355480743	3.28068958416649	-4.49379381069565	0.00777182801488197	0.544053661106456	-2.5949297631115
Q8TF39	ZNF483	-0.30063520360481	3.30637188474035	-3.7831803560003	0.0148779047922745	0.544053661106456	-2.5977711021348
Q96RP9	GFM1	-0.194785463913515	3.26123665818498	-4.35401663535991	0.00878132972923597	0.544053661106456	-2.60611541882887
O60563	CCNT1	0.202211209304226	3.30685447279558	4.06181446028408	0.011434474484723	0.544053661106456	-2.60924598693138
P50553	ASCL1	-0.438069194322283	3.24080949763568	-3.6906228338345	0.0162794867445667	0.544053661106456	-2.62060422631981
P47974	ZFP36L2	-0.352494354751442	3.29475190816669	-3.65234670147204	0.0169035039524925	0.544754640063627	-2.63014667452766
Q15583	TGIF1	-0.573156172967692	3.26362778555732	-3.6563335909458	0.0168372270538258	0.544754640063627	-2.63296697217849
O14917	PCDH17	-0.486374600156851	3.24622424856166	-3.6964660573184	0.016186594734879	0.544053661106456	-2.63342926959328
Q9P2N6-3	KANSL3	0.203482769308526	3.34228121198423	3.98405237320482	0.012291952103839	0.544053661106456	-2.63367061588708
P12694	BCKDHA	-0.291620370541839	3.2701132580865	-3.92980567714126	0.0129347103007164	0.544053661106456	-2.63538047881343
Q96AE7	TTC17	0.224072586265738	3.33707859499957	3.94283833280836	0.012776779198728	0.544053661106456	-2.64123869626178
Q9HD33-1	MRPL47	-0.313285611981719	3.22626153781878	-3.75440203089589	0.0152981044575079	0.544053661106456	-2.64433931229448
Q9NYK5-1	MRPL39	-0.33997745301754	3.27921199191344	-4.08028454458032	0.0112412094611988	0.544053661106456	-2.65112689864464
Q96HY7	DHTKD1	-0.190497906092785	3.27257388811489	-4.10340707533268	0.0110046236755762	0.544053661106456	-2.65301190270108
P51608-2	MECP2	-0.297012810948468	3.28062374235616	-3.72304092636038	0.0157718106182221	0.544053661106456	-2.65984601277964
Q9HAV7	GRPEL1	-0.184195112482122	3.27520641634557	-4.07005028413119	0.0113478212485632	0.544053661106456	-2.66188651862965
Q8N442	GUF1	-0.193613114509168	3.25578239967139	-3.92401390664827	0.0130056257824777	0.544053661106456	-2.66604811879475
P60983	GMFB	-0.318652696141873	3.29367185782179	-3.66050370298334	0.0167682265080286	0.544754640063627	-2.66648768736464
Q5JSZ5-1	PRRC2B	0.175266291860358	3.32244988350311	4.45396849748111	0.00804485904745201	0.544053661106456	-2.66818600575331
Q96S44	TP53RK	-0.257397750939338	3.29116645113338	-3.6883123123811	0.0163163885888453	0.544053661106456	-2.67450813114172
Q6PJT7-5	ZC3H14	0.166220459484848	3.32082775956163	4.20563179654359	0.010026105085578	0.544053661106456	-2.67756042067045
Q7Z6K1	THAP5	-0.441567006599863	3.24154001091058	-3.5919908563645	0.0179447212623475	0.544754640063627	-2.69665528438184
P22061-2	PCMT1	-0.208334627324989	3.24166579499059	-3.96991102715779	0.012455845206935	0.544053661106456	-2.69775401638367
P43243	MATR3	0.159039026902983	3.3546071612257	4.93550137694473	0.00537224536677203	0.544053661106456	-2.69870335762535
Q9NYF0	DACT1	-0.727917857060601	3.16707647570359	-3.58245211803563	0.0181159883803817	0.544754640063627	-2.69890390296558
Q96LX8	ZNF597	0.28051484657362	3.33614016461345	3.61331687270541	0.0175685510017562	0.544754640063627	-2.71395304024977
Q8WW38-1	ZFPM2	0.249363307549131	3.29228253235836	3.77059187857307	0.0150600395377815	0.544053661106456	-2.71651045888065
Q99805	TM9SF2	0.213533615076332	3.34390796533826	3.96594979723968	0.0125022109356932	0.544053661106456	-2.71811628458385
Q9HCG7	GBA2	0.24952850214815	3.32534275172508	3.87326121002512	0.0136468338522634	0.544053661106456	-2.72252708958141
Q9HCM4	EPB41L5	0.182450781090594	3.32849516235287	3.97357395382823	0.0124131496311986	0.544053661106456	-2.72302702416202
Q9UKI2	CDC42EP3	-0.315637499550886	3.26699538216178	-3.55066787297303	0.0187004789007177	0.547128419941793	-2.72602800802317
Q13332-6	PTPRS	0.220235546221045	3.33390056940575	3.83053262159529	0.0142153618596272	0.544053661106456	-2.72678315268213
Q9UL33-1	TRAPPC2L	-0.499247958396389	3.32228846641132	-3.53932810427901	0.0189142678154761	0.547128419941793	-2.73338706116065
A0AVK6	E2F8	-0.282482742240208	3.28300589395789	-3.56719799235795	0.0183938222858581	0.54566157499969	-2.73585501811132
Q96EL3	MRPL53	-0.271663761696779	3.26583625683675	-3.63610356461171	0.0171766701280699	0.544754640063627	-2.74017481788592
P29992	GNA11	0.181581093210838	3.34938486152998	3.90699796421475	0.0132166100277538	0.544053661106456	-2.74853178935755
Q9H2B2	SYT4	-0.32130818343108	3.2746826885378	-3.60169034612262	0.0177724870312575	0.544754640063627	-2.75191359129589
P62995	TRA2B	0.185165042612407	3.32056760910359	3.97771165889698	0.0123651253391126	0.544053661106456	-2.75767859015358
P11498	PC	-0.171173944089538	3.27506173034969	-4.17564925722247	0.0103021385948534	0.544053661106456	-2.76196600439827
Q9Y2E4	DIP2C	0.198496447129158	3.32075666194037	3.81038774954927	0.0144929391468868	0.544053661106456	-2.76707657352834
Q5H9F3-3	BCORL1	0.21753095466924	3.34658981548467	3.83936361774666	0.0140956333371843	0.544053661106456	-2.77141596613922
O00217	NDUFS8	-0.246993510532334	3.28584677567496	-3.65116483764455	0.0169232090068713	0.544754640063627	-2.77300128490231
P21953	BCKDHB	-0.337452369214324	3.23978317448517	-3.51967877901971	0.0192914433606725	0.547128419941793	-2.77394751087761
Q9Y2R9	MRPS7	-0.293907887852411	3.29169927036276	-3.76408135413076	0.0151552526680327	0.544053661106456	-2.77593316311298
Q96KR1	ZFR	0.161683289636306	3.33010149538427	4.26892755664989	0.00947134744334934	0.544053661106456	-2.77884769865434
Q9H3M7	TXNIP; LOC101060503	0.360292584760242	3.35038180617834	3.47536542616556	0.0201743997940659	0.547700474399397	-2.78107062643303
Q9UNI6	DUSP12	-0.270385790579137	3.30409352357574	-3.77013855302112	0.015066646625638	0.544053661106456	-2.78741136897933
Q8IV50	LYSMD2	-0.563594847822928	3.41121042450657	-3.49023477992836	0.0198730206804647	0.547128419941793	-2.79214788884006
A4D1E9-1	GTPBP10	-0.236972592861107	3.23338212756293	-3.97526802627384	0.0123934610903636	0.544053661106456	-2.80425996336775
Q9BRT2	MNF1; UQCC2	-0.291297025587612	3.26467328541939	-3.59510247324766	0.0178892584672331	0.544754640063627	-2.80796890959916
Q9Y5P6-2	GMPPB	-0.278380425864524	3.29972052341374	-3.73367233014787	0.015609340056007	0.544053661106456	-2.81365594318643
Q9Y2J2-2	EPB41L3	0.163402232465805	3.32722393512618	4.13899205888775	0.0106518118754108	0.544053661106456	-2.81688763571722
Q06481	APLP2	0.213891803956019	3.32029864993059	3.93634855021329	0.0128551401339709	0.544053661106456	-2.82030171088192
Q1KMD3	HNRNPUL2	0.101203260004337	3.31642242504826	4.6125363160685	0.00702024920645987	0.544053661106456	-2.82210633712047
Q8N183	NDUFAF2	-0.215207009806534	3.22524551270285	-3.79049469425712	0.0147732551357789	0.544053661106456	-2.82954257646902
Q96H35	RBM18	-0.33231597773269	3.3033995607178	-3.70013312596848	0.0161286121072498	0.544053661106456	-2.8402943839475
Q6UB35-1	MTHFD1L	-0.256479773110045	3.23333459894135	-4.07354686233944	0.0113112644086082	0.544053661106456	-2.84362448266234
Q17R98	ZNF827	-0.629530860298616	3.65415105387112	-3.69420738111848	0.0162224286689411	0.544053661106456	-2.84537413941552
Q9HAY2	MAGEF1	-0.463430906047938	3.21149777105504	-3.42684631977945	0.0211951271036759	0.547791317820736	-2.85433895583377
O43678	NDUFA2	-0.413738751360395	3.28030518404938	-3.41674185705564	0.0214151215022831	0.547791317820736	-2.8584072917242
Q9Y2H5	PLEKHA6	0.195180330434419	3.34516874688787	3.80701086873861	0.0145400842441141	0.544053661106456	-2.87335922963614
Q99758	ABCA3	0.208755981534644	3.31758821997162	3.64939315178811	0.0169527979917562	0.544754640063627	-2.87974246658789
Q6P587-3	FAHD1	-0.354586342542853	3.29164385730676	-3.45401169507904	0.0206164822171449	0.547791317820736	-2.89705847208886
P23771-2	GATA3	-0.284160690538149	3.29176080043789	-3.47233175089532	0.020236533842972	0.547700474399397	-2.90263503234059
P13994	CCDC130	0.248976258666992	3.35096429404065	3.45766458621237	0.0205400707685542	0.547791317820736	-2.90424676466738
Q5T7W7	TSTD2	-0.235851260621648	3.29165411832719	-3.58652743137931	0.0180425860436531	0.544754640063627	-2.91187759821377
O15020	SPTBN2	0.122068342210442	3.33729395876745	4.40428764685955	0.00840144066492559	0.544053661106456	-2.91287773108008
O14529	CUX2	0.26403020698396	3.34786445161785	3.37549002331853	0.0223409720430754	0.550968272456415	-2.93010518329885
P08559-4	PDHA1	-0.177313161605393	3.27210637496112	-3.81618438065016	0.0144124256854528	0.544053661106456	-2.93133427219573
Q969M7-2	UBE2F	-0.390465481304787	3.26934754478103	-3.3483310229183	0.0229756796282617	0.552474574369767	-2.93555422202519
P48047	ATP5O	-0.165905176154987	3.27742584456435	-3.7765993113026	0.0149728002957144	0.544053661106456	-2.93767980795761
Q7Z3K3-1	POGZ	0.162540283668455	3.33172977205574	4.0489988601538	0.0115708576400413	0.544053661106456	-2.95018121593762
Q8NE01	CNNM3	0.186613435113818	3.33591923152854	3.75331887036276	0.0153141873817563	0.544053661106456	-2.95196576433518
P61081	UBE2M	-0.350710032732734	3.28598852086928	-3.49053965704519	0.0198668958875917	0.547128419941793	-2.96023567623467
Q8TBA6	GOLGA5	0.204907742801323	3.33589805162468	3.83309432723241	0.0141805093764441	0.544053661106456	-2.96054241992617
Q9ULI2-1	RIMKLB	-0.377685491759687	3.2621559038132	-3.26489370776381	0.0250591730182179	0.560275698062327	-2.96792625057889
Q9UKJ3-1	GPATCH8	0.162827494496998	3.33122165852067	3.89934586842491	0.0133127892963574	0.544053661106456	-2.97103940000082
Q9Y5J1	UTP18	-0.186334974049277	3.30089561374692	-3.78763007163012	0.0148141383159293	0.544053661106456	-2.9726908111794
Q9P273	TENM3	0.221949313210622	3.3109751206033	3.7773816033344	0.0149614832379509	0.544053661106456	-2.97494515795509
Q9HCK1	ZDBF2	0.154554430779394	3.35431887133596	3.94279740397594	0.0127772716449154	0.544053661106456	-2.97509093249303
P01024	C3	0.358728329191436	3.36475271414176	3.27269408775335	0.0248554598808904	0.5599867934246	-2.97638913975246
P08582-1	MFI2; MELTF	0.24796623353466	3.34468251632898	3.4895281194882	0.0198872254369438	0.547128419941793	-2.97747686051834
Q9P2J9	PDP2	-0.44729865021172	3.25237407675021	-3.27946612918218	0.024680142042899	0.5599867934246	-2.97877252321794
Q86YC2	PALB2	0.286258552588481	3.32054523740728	3.50636671019891	0.0195519134742022	0.547128419941793	-2.98034162470157
Q7Z3B3	KANSL1	0.192969628757547	3.32817588709097	3.76474954007975	0.0151454486271237	0.544053661106456	-2.98268474683029
Q9Y3B7-1	MRPL11	-0.2024969981198	3.26993171904604	-3.73895075146068	0.0155293972072524	0.544053661106456	-2.9879185199997
P57058	HUNK	-0.257843441813246	3.27878801898868	-3.3149859075542	0.0237835130069748	0.556908327039724	-2.99155641818452
Q9BX79-4	STRA6	0.24114865464828	3.33294249683975	3.54793693295928	0.0187517088138924	0.547128419941793	-2.99901123533758
Q9UHL9	GTF2IRD1	0.200933924968555	3.33012440396263	3.6359385298345	0.0171794717150378	0.544754640063627	-3.00041700771486
Q5T653	MRPL2	-0.269981438149509	3.20989183610298	-3.46289840291253	0.0204311580698557	0.547791317820736	-3.00292167788452
Q15293	RCN1	0.155326717560104	3.33139562110795	3.8680888299115	0.0137142272250079	0.544053661106456	-3.01063892468804
O95900	TRUB2	-0.245013981830081	3.26044865789377	-3.42994885806693	0.0211281020731042	0.547791317820736	-3.01139058182024
P30048	PRDX3	-0.1579510923892	3.29145949831511	-3.99917676261034	0.0121194455643227	0.544053661106456	-3.01397901472728
Q8NC60	NOA1	-0.181964831382611	3.25406399689768	-3.63976570529271	0.0171146386264688	0.544754640063627	-3.03026226742656
P42773	CDKN2C	-0.256272984788356	3.31583021613356	-3.28624150890741	0.0245061562298693	0.5599867934246	-3.03316407509987
P60520	GABARAPL2	-0.199332479215547	3.27221712599052	-3.50787597585937	0.019522179183963	0.547128419941793	-3.03417165632376
Q8N474	SFRP1	-0.249320440499712	3.29474985393629	-3.38401298357047	0.0221459660104639	0.550968272456415	-3.03457494319692
Q9NQG6	SMCR7L; MIEF1	-0.26431170872744	3.2806288673178	-3.3265605924706	0.0234994561018759	0.555511728269957	-3.03762878796207
O94782	USP1	-0.179807209176962	3.29080182128706	-3.74334603611355	0.0154631924436237	0.544053661106456	-3.0386926060521
Q9UMR3	TBX20	-0.253306916307619	3.31606720168376	-3.50302878864451	0.0196178603934391	0.547128419941793	-3.03908496217313
Q96I51	WBSCR16; RCC1L	-0.249951906968736	3.25880427335299	-3.44372088590979	0.0208335151799439	0.547791317820736	-3.04084612751082
Q6NS38-1	ALKBH2	-0.266325440299464	3.30797123269247	-3.26301187224717	0.025108604942775	0.560275698062327	-3.04792726046322
P30305-1	CDC25B	-0.224545157076361	3.25801374828154	-3.50901212475474	0.0194998301875949	0.547128419941793	-3.05174659236978
Q01844-5	EWSR1	0.14460069516136	3.33149109196208	3.79228849041358	0.0147477213418789	0.544053661106456	-3.05427774440124
Q9Y3B1	SLMO2; PRELID3B	-0.396141204918433	3.32022092652957	-3.25195758193956	0.0254012458202415	0.56165725505977	-3.05450014983851
Q8WW59	SPRYD4	-0.37978166919905	3.31498053035528	-3.26113501267575	0.0251580175711793	0.560275698062327	-3.05617947362741
P50213-1	IDH3A	-0.189832150654115	3.27026631750727	-3.59746865500334	0.0178472154530913	0.544754640063627	-3.06006877960803
Q9ULK5	VANGL2	0.271494883555642	3.34899884206658	3.22602500181522	0.0261032337448108	0.56324339014856	-3.06765817072039
P17480-1	UBTF	0.114038118583386	3.3214812284553	4.25232894457312	0.00961326515919412	0.544053661106456	-3.0711191016485
Q9NQH7-1	XPNPEP3	-0.235850360737043	3.29098754530639	-3.43800257704005	0.0209552524912067	0.547791317820736	-3.07224376487808
Q9Y2W1	THRAP3	0.18455886182273	3.34137026067721	3.97792066259529	0.0123627052981234	0.544053661106456	-3.0733847137381
Q12788	TBL3	0.182492720371694	3.33520519498962	3.70586418838734	0.0160384763383416	0.544053661106456	-3.07712903079594
P40939	HADHA	-0.196510956132121	3.26148951798068	-4.00939433524718	0.0120045054320162	0.544053661106456	-3.08037315938692
Q8N6I1-1	EID2	-0.480784140359168	3.28701305237422	-3.13642408569668	0.0287054029587766	0.571093649318286	-3.08458475580559
Q8IVS2	MCAT	-0.403586423901019	3.27527004050675	-3.38470239391042	0.0221302780796652	0.550968272456415	-3.08512411349781
Q6PCD5	RFWD3	-0.292929367819079	3.3154419448835	-3.3770257718452	0.0223056884806476	0.550968272456415	-3.08600488577603
Q9Y4A5	TRRAP	0.179035393463678	3.323020912077	4.33270259862105	0.00894846764675604	0.544053661106456	-3.08974141691141
P13196	ALAS1	-0.32151391788468	3.15032627913889	-3.19069532589944	0.0270956505355953	0.567813672449573	-3.09480115918397
Q9Y2Z2-6	MTO1	-0.186566507370253	3.26486457561561	-3.45842355444159	0.0205242356337817	0.547791317820736	-3.09615825718349
Q9Y697	NFS1	-0.183046659498142	3.26632670148516	-3.60288349918753	0.0177514326679582	0.544754640063627	-3.10247145503252
Q5JRX3	PITRM1	-0.176391149439588	3.27031811374495	-3.8308850719019	0.0142105607960968	0.544053661106456	-3.11130279444747
P50548	ERF	-0.250071556292056	3.30133173874667	-3.19086017534332	0.0270909206895208	0.567813672449573	-3.11303752537216
Q9NVS2-2	MRPS18A	-0.236873684782098	3.21862844236912	-3.4135558491171	0.0214850320722204	0.547791317820736	-3.12347508419675
Q8TAQ2-3	SMARCC2	0.128395959757725	3.33927176715072	4.17747077862471	0.0102851167821728	0.544053661106456	-3.1239311509588
Q12955	ANK3	0.174732755597472	3.33106497683933	3.79453595325359	0.0147158022446053	0.544053661106456	-3.12923166025136
Q9P015	MRPL15	-0.363325232019112	3.28234066871423	-3.57452052766443	0.0182598411274793	0.544754640063627	-3.13283011824531
Q9Y6X3-1	MAU2	0.182178864940631	3.34064393280159	3.41340016389793	0.0214884550056839	0.547791317820736	-3.1376157424026
P30837	ALDH1B1	-0.252567658605953	3.28069887230307	-3.74969758233249	0.0153680996339148	0.544053661106456	-3.14122971204628
Q16595-1	FXN	-0.277593353961343	3.27727929694038	-3.23962242661002	0.0257324213861826	0.563006468963826	-3.14260991104428
Q7Z7G8-2	VPS13B	0.182857962072191	3.32931303804487	3.57872966817633	0.0181833373184238	0.544754640063627	-3.14767842851668
O43766-1	LIAS	-0.299680323359204	3.31652687682251	-3.14445152345335	0.0284605515325321	0.569260001633295	-3.15154092570558
Q14160-3	SCRIB	0.185905919342487	3.3267062322425	3.88768383611254	0.0134609434015976	0.544053661106456	-3.15235764604692
P21333	FLNA	0.0510927188597953	3.32633849541359	4.75974179433064	0.00620425919022373	0.544053661106456	-3.1547460188291
Q08379	GOLGA2	0.170651935772681	3.34608751674318	3.8125163146157	0.0144633133562895	0.544053661106456	-3.15826167929648
Q16587-1	ZNF74	-0.391993232632849	3.28882636923769	-3.05779216589254	0.031235253157094	0.571330856959487	-3.15897915182952
O00330-1	PDHX	-0.164446143212816	3.27069182737454	-3.48589139950562	0.0199605137052311	0.547338296864496	-3.16105289409234
Q96P11-2	NSUN5	-0.21881210231733	3.32759317200735	-3.66624016278412	0.0166738435749761	0.544754640063627	-3.16259737707137
O95402-1	MED26	0.230832319395552	3.33577846844369	3.28018135338081	0.0246617089523778	0.5599867934246	-3.16688526248452
Q9P031	CCDC59	-0.367615416681773	3.24422793559518	-3.27412966951692	0.0248181758362075	0.5599867934246	-3.1754358534143
P55011	SLC12A2	0.19977525077695	3.34240283565471	3.49531099226309	0.0197713261127791	0.547128419941793	-3.17797518463434
Q9NX20	MRPL16	-0.30441227429342	3.26058974351016	-3.06688962326957	0.0309299278568427	0.571330856959487	-3.18817675074028
Q9NWU5	MRPL22	-0.267224580554258	3.26438761301333	-3.15882291528745	0.0280281319790682	0.567813672449573	-3.18926101841018
Q96GE4	CEP95	-0.187681265271256	3.27439785844271	-3.29912752945049	0.0241791245014068	0.559182646354196	-3.19379724172164
O14497	ARID1A	0.16117266901847	3.32825938425186	4.180688959415	0.0102551239023619	0.544053661106456	-3.19463458234867
Q96EU6	RRP36	-0.239649876072307	3.27005861014057	-3.42128893437317	0.0213157984883375	0.547791317820736	-3.19548783461138
P49207	RPL34	-0.37267334154378	3.23707335208409	-3.34493581752419	0.0230564748422053	0.552474574369767	-3.20281886721761
Q86TX2	ACOT1	-0.279153391973118	3.28510430143145	-3.23445201752207	0.0258727068089724	0.56311980146108	-3.20510360512481
Q9UJX2-1	CDC23	0.159144639224952	3.33761354122	3.49291367563999	0.0198192778133778	0.547128419941793	-3.2075356411259
P19388	POLR2E	-0.365672837666151	3.34895586877981	-3.34593904988338	0.0230325671115095	0.552474574369767	-3.21285489711511
P00374	DHFR; DHFRP1	-0.365036942720044	3.30047204293106	-3.51427112805564	0.0193967654899443	0.547128419941793	-3.22343900871748
Q9NX07-1	TRNAU1AP	-0.356304060724668	3.29354700738242	-2.9806578880403	0.0339663837525948	0.571330856959487	-3.22428674226675
Q8IXZ2-1	ZC3H3	-0.441375115913521	3.25624883235376	-2.98016437375689	0.0339847103662013	0.571330856959487	-3.22441237735262
Q12996-1	CSTF3	0.175294961147021	3.32515112862228	3.79342515040301	0.0147315681236443	0.544053661106456	-3.22990511176392
Q96L91	EP400	0.167331005635156	3.33307604273064	3.97267334796238	0.0124236313551658	0.544053661106456	-3.23136755555146
P00367	GLUD1	-0.285654362378039	3.29980555658394	-3.88651583271535	0.0134758872861796	0.544053661106456	-3.23157825572601
P61962	DCAF7	-0.405558072389162	3.3062787432752	-3.39255703448294	0.0219524414553367	0.550968272456415	-3.23573500229293
Q14201-2	BTG3	-0.309898605342258	3.27758082023909	-2.98132754987266	0.0339415338464573	0.571330856959487	-3.23758874450619
Q14257-2	RCN2	0.128403371394293	3.33831453222313	3.59164169023151	0.0179509573634974	0.544754640063627	-3.24404075458176
Q96A58	RERG	-0.234364223067883	3.31117692662442	-3.08076888648936	0.0304706428610929	0.571330856959487	-3.24506066429301
Q9BRK3-2	MXRA8	0.29946745479556	3.38591572043358	3.13974264991988	0.0286038902114544	0.570435475604507	-3.24713906352465
O94910	LPHN1; ADGRL1	0.256252081316879	3.35106613751297	3.056340310553	0.031284296592103	0.571330856959487	-3.25755280694046
Q7Z2W9	MRPL21	-0.255674729065117	3.24001476816958	-3.01928134313636	0.0325663027188108	0.571330856959487	-3.2625403305508
Q9NV79	PCMTD2	-0.208503386898363	3.32975750369347	-3.23469569922873	0.02586607550448	0.56311980146108	-3.26678168080136
Q15717-2	ELAVL1	0.152136681266585	3.3332591096981	3.56233591119875	0.0184834126725203	0.545874997788465	-3.26715796886185
Q9NV06	DCAF13	-0.254638538853024	3.30641353209231	-3.5748520410122	0.0182538021657003	0.544754640063627	-3.27578272918103
O75161	NPHP4	0.253516754802717	3.33803872230281	3.01843553172248	0.0325962520129102	0.571330856959487	-3.27835375826881
Q96GY0	ZC2HC1A	-0.264938415826419	3.24463782597011	-3.37237187004024	0.022412808869639	0.550968272456415	-3.27917043559219
P78540	ARG2	-0.378702060809842	3.26829635743848	-3.03028265191678	0.0321795938949924	0.571330856959487	-3.2833062843515
Q15269	PWP2; LOC102724159	0.150813145848151	3.33372378726085	3.68994644863443	0.0162902794051577	0.544053661106456	-3.28487461969947
P39880-3	CUX1	0.154772252901806	3.33948311751786	3.77450782327258	0.0150031058009087	0.544053661106456	-3.28729188787629
Q9H2D6	TRIOBP	0.175421469120941	3.33719947561248	3.44395290108354	0.020828593040612	0.547791317820736	-3.28776046202414
P14314	PRKCSH	0.109160961837214	3.33447474483858	3.7615220137128	0.0151928732145906	0.544053661106456	-3.29061062480607
Q7L3T8	PARS2	-0.24613104775945	3.28002487712962	-3.09096599792207	0.030138155433151	0.571330856959487	-3.29201017060984
Q9NTK5-1	OLA1	-0.240522087959749	3.30048424555974	-3.73981339484074	0.015516377552113	0.544053661106456	-3.29300585431952
P46779	RPL28	-0.365308991250056	3.25404013957648	-3.75407797468834	0.0153029140321621	0.544053661106456	-3.29374267149914
A8MWY0	KIAA1324L	0.192607278765677	3.33022968957633	3.34943883424617	0.0229493876783797	0.552474574369767	-3.29408272923106
Q7L0Q8-1	RHOU	-0.571436917334677	3.2820291312554	-2.95492898144538	0.0349369510738098	0.571330856959487	-3.29421937898047
Q6Q0C0-1	TRAF7	0.207395907335019	3.3283767453312	3.16599790234769	0.0278150570399341	0.567813672449573	-3.29995612372716
Q9H0H3	KLHL25	-0.173313696034993	3.32609195556705	-3.21363169990885	0.0264465484156746	0.566731176331783	-3.30220775468028
P26373-1	RPL13	-0.366518644828805	3.255121895574	-3.47345845596053	0.0202134315518349	0.547700474399397	-3.30784698225866
Q9NS37	CREBZF	-0.231319789867916	2.89536568549552	-3.02846816068067	0.0322430142887058	0.571330856959487	-3.31531297779337
Q2Y0W8	SLC4A8	0.17679141938701	3.37143198746969	3.22475434776728	0.0261381971080567	0.56324339014856	-3.31654770217404
P05067-1	APP	0.14349795901316	3.33801858554133	3.61641763164531	0.01751462058145	0.544754640063627	-3.3170546862847
Q4FZB7-1	SUV420H1; KMT5B	-0.305372583464403	3.27432674114217	-3.03723865875958	0.0319377773552904	0.571330856959487	-3.32001291136844
Q86WA6	BPHL	-0.348834166105441	3.29777700492254	-3.16210443931768	0.0279304502280895	0.567813672449573	-3.32012687712007
O95639	CPSF4	0.150781662983205	3.34725314688574	3.32927175189482	0.0234334856401479	0.555511728269957	-3.32140758013349
P62829	RPL23	-0.211023013866936	3.28328252158092	-3.69229410255913	0.0162528549063588	0.544053661106456	-3.32192181724519
Q9H4W6	EBF3	0.186697789018437	3.34208389171036	3.29236170783298	0.0243502040099056	0.559182646354196	-3.32369376452104
Q8TBF2-8	FAM213B	-0.306177024797575	3.31134799977367	-3.08041474894696	0.0304822647643897	0.571330856959487	-3.32516011279859
Q9NZE8	MRPL35	-0.228902291097045	3.22051133682359	-3.00943911885127	0.0329167502822608	0.571330856959487	-3.32516268468701
O75608	LYPLA1	-0.440198525555037	3.32939120705554	-3.0565917397671	0.0312757970821365	0.571330856959487	-3.3278974309609
Q15911-1	ZFHX3	0.152253895730453	3.32729352870692	3.94341498739888	0.0127698433783618	0.544053661106456	-3.33620547542424
Q9Y303	AMDHD2	-0.389107903394769	3.31043968094604	-3.02611584533752	0.0323254444690286	0.571330856959487	-3.34022771235295
Q00973	B4GALNT1	0.242165493345764	3.32883776022641	3.17392419406718	0.0275818200482843	0.567813672449573	-3.34172528438276
Q9BW92	TARS2	-0.162675624764937	3.2901863976485	-3.42904158970102	0.021147676746193	0.547791317820736	-3.34667895125755
Q6KC79	NIPBL	0.16089343695566	3.32947633005664	3.96091146446207	0.0125614754366291	0.544053661106456	-3.34994993559549
Q9H5Y7	SLITRK6	-0.168020870179499	3.31163875927696	-3.3183897735612	0.0236995705338467	0.556505971746891	-3.35143356097232
Q96PK6-1	RBM14; RBM14-RBM4	0.165059765302852	3.36004495802556	3.79482698779432	0.0147116747701871	0.544053661106456	-3.35518615872173
Q5T440	IBA57	-0.249771026441727	3.25944499458201	-3.03868986384132	0.031887589068638	0.571330856959487	-3.35583364419202
Q9HCU4	CELSR2	0.205585515957375	3.35668955657185	3.0984654147809	0.0298962673723658	0.571330856959487	-3.3634237490241
O15031	PLXNB2	0.187374144630281	3.32996583473063	3.55971128555661	0.0185319846897955	0.545874997788465	-3.36914231636662
P43897	TSFM	-0.205931611898645	3.22762606250757	-3.42605185547862	0.0212123295360881	0.547791317820736	-3.37174531642109
P27144	AK4; LOC100507855	-0.404937705089671	3.30055729925226	-3.05308103716168	0.0313947139143152	0.571330856959487	-3.3725554867446
Q9Y6M7-13	SLC4A7	0.181392661603658	3.32652135644691	3.29987026475879	0.0241604280093925	0.559182646354196	-3.37497932737513
O75362	ZNF217	-0.163698985534102	3.28052397756313	-3.58130163083664	0.0181367728547255	0.544754640063627	-3.37722956518431
P55197	MLLT10	0.264216569404024	3.29176601533533	2.94661696854877	0.035257195865689	0.571330856959487	-3.37964764142546
Q03933-2	HSF2	-0.177835218382504	3.27385236055029	-3.10883602900157	0.0295654092330416	0.571330856959487	-3.38505009861873
P36508	ZNF76	-0.382187053664017	3.25133413999639	-2.79518092295972	0.041714424520122	0.574766769410442	-3.39189864388688
Q8IZA0	KIAA0319L	0.190493138214719	3.32926862995744	3.24111570189913	0.0256920676516012	0.563006468963826	-3.39277717916198
Q8NBM8	PCYOX1L	0.252384347591603	3.31319906359862	3.00545199716905	0.0330599360049569	0.571330856959487	-3.39403281462279
Q6ZNB6-1	NFXL1	0.14663987729438	3.33481993442251	3.41824541839108	0.0213822199155866	0.547791317820736	-3.40450556839305
O15230	LAMA5	0.222955248173148	3.35260190258313	2.97214781271601	0.0342839818110797	0.571330856959487	-3.4080468443238
Q8IV48	ERI1	-0.221860163939936	3.31726365021892	-3.16801198438545	0.0277555782356982	0.567813672449573	-3.41012305153611
Q9Y2Q0-3	ATP8A1	0.14161031970139	3.3406542238305	3.37767989622732	0.0222906795617896	0.550968272456415	-3.41083450549374
Q9H0W5	CCDC8	-0.333806432228877	3.28864242542637	-2.77266579485957	0.0427839291053473	0.574766769410442	-3.41993414591663
Q12834	CDC20	-0.31216738046608	3.32778397401815	-3.06120060701306	0.0311204601386622	0.571330856959487	-3.42242764889847
O60503	ADCY9	0.272801241995362	3.33761271883479	2.85356764167839	0.0390784890812054	0.574766769410442	-3.42300995117614
Q8TDR2	STK35	-0.225032143372218	3.28665406601955	-3.00086138131428	0.0332256715483007	0.571330856959487	-3.42744645162051
Q12860	CNTN1	0.136221576708647	3.33596705532269	3.76080923796524	0.0152033698471491	0.544053661106456	-3.42780385660949
O15370	SOX12	-0.25350742353435	3.3106397478486	-2.85696003584153	0.0389312090874231	0.574766769410442	-3.43292944717509
Q8NB49-1	ATP11C	0.141301386958128	3.34231434888588	3.39113638794535	0.0219844840255058	0.550968272456415	-3.43438677857281
Q6P161	MRPL54	-0.280768933865924	3.22726202828653	-2.83442414125959	0.0399214760563557	0.574766769410442	-3.43474351910505
Q6ZU80	CEP128	0.163105731264662	3.33712582298294	3.39462996271194	0.0219057831511644	0.550968272456415	-3.43712955915455
Q9NZM5	GLTSCR2; NOP53	-0.460644285872138	3.23680171199169	-3.03426551513308	0.0320408810345442	0.571330856959487	-3.43835683617852
O95478	NSA2	-0.382601284207157	3.26592631914127	-3.08184412032436	0.0304353873160857	0.571330856959487	-3.44301311162906
Q8NEZ4-3	KMT2C; MLL3	0.157104943411534	3.31927743895858	3.63551603390678	0.0171866463084418	0.544754640063627	-3.44419704659584
Q99581	FEV	-0.441843622738572	3.34808701393245	-2.75455529426746	0.043666603587091	0.574766769410442	-3.44499884091728
Q8IWT3	CUL9	0.189062456195789	3.33394261304447	3.08443466977506	0.0303506372440195	0.571330856959487	-3.44609711089353
Q9GZT8-1	NIF3L1	-0.243116119479923	3.30264238023382	-3.09357866748525	0.0300536333806442	0.571330856959487	-3.45481687188474
P10515	DLAT	-0.25760703851591	3.22581177775562	-3.29274095363464	0.0243405777775981	0.559182646354196	-3.45865128103458
Q9NZJ6	COQ3	-0.186470654273485	3.25221319135087	-3.14707310376388	0.0283811058906749	0.569260001633295	-3.46074804553546
Q9NSI2-1	FAM207A	-0.19627412841251	3.30744370623373	-2.93943294054784	0.0355366637907724	0.571879593358839	-3.46154388475495
Q86V59	PNMAL1; PNMA8A	-0.265222680806179	3.26014566341729	-2.89034243904292	0.0375148749577709	0.574766769410442	-3.46717830595267
Q96L93-1	KIF16B	0.1728416928583	3.33006642961146	3.16702714047378	0.0277846439415874	0.567813672449573	-3.46879174153104
P19022	CDH2	0.163140955850565	3.33767277040759	3.51332074764048	0.0194153441414784	0.547128419941793	-3.46885284702579
Q9BXW7	CECR5; HDHD5	-0.203565281498137	3.28412136656299	-3.08402361800902	0.0303640668736875	0.571330856959487	-3.46942087145922
Q9NNW7-1	TXNRD2	-0.19635363764307	3.27533070251539	-3.02908140824142	0.0322215640725448	0.571330856959487	-3.47011965133601
Q6ZU35	KIAA1211	0.146861889891611	3.3211890961567	3.45951462852648	0.0205014961013662	0.547791317820736	-3.47191977800647
Q96SB8	SMC6	0.162650530372933	3.33053593521662	3.68112288773864	0.0164318349107808	0.544754640063627	-3.47291390580854
P51693-1	APLP1	0.233197610608214	3.35860557592745	2.98697847953369	0.0337326581224381	0.571330856959487	-3.47337225996125
Q9H4K7	GTPBP5; MTG2	-0.191556715168843	3.28953184883929	-3.00649885072607	0.0330222729566816	0.571330856959487	-3.47666873847914
O94925-1	GLS	-0.146847611971836	3.28133400862315	-3.35007793149615	0.0229342355687712	0.552474574369767	-3.47703299614664
P21579	SYT1	0.100573892401104	3.32371226995246	3.52940085023191	0.0191037489516119	0.547128419941793	-3.47952347255671
P56199	ITGA1	0.171735565846536	3.35216910448328	3.24579740374967	0.0255660203490201	0.563006468963826	-3.4797945216909
Q16643	DBN1	0.113143087702143	3.33041516919921	3.87144599367457	0.0136704411186518	0.544053661106456	-3.4803419953472
Q9BSM1	PCGF1	-0.255654658747642	3.3337660073592	-2.8500894538291	0.039230147004477	0.574766769410442	-3.48882049788102
Q9P2Z0	THAP10	0.373179557588013	3.32099108762332	2.69606590328923	0.0466599345884538	0.574766769410442	-3.49168309339624
Q9GZN2-1	TGIF2	-0.595263630972305	3.28104315877915	-2.70748520167718	0.046057900025674	0.574766769410442	-3.49502269464894
Q7L592	NDUFAF7	-0.162927109338771	3.28214843085797	-3.20089511142257	0.026804770142217	0.567813672449573	-3.49510383053098
Q6PL18-1	ATAD2	0.132491685819399	3.34796746562331	3.77687447906317	0.0149688184362423	0.544053661106456	-3.49558659561188
Q8NFD5-3	ARID1B	0.179890901649561	3.33686851606911	3.5444135903244	0.0188180434154473	0.547128419941793	-3.49628119955015
P60033	CD81	0.275426926353492	3.38714373307773	2.9376450961392	0.0356066027003359	0.571901040674374	-3.50072577852737
Q9NQV8-1	PRDM8	-0.22012116506617	3.30473577108679	-2.87010862422947	0.0383662578318466	0.574766769410442	-3.50254739545752
Q5M775-1	SPECC1	0.212118009240789	3.3205810113126	3.16415571185962	0.0278695872303686	0.567813672449573	-3.5058308975235
Q9NZM4	GLTSCR1; BICRA	0.18033327289591	3.33815768473428	3.03623764152558	0.0319724487712007	0.571330856959487	-3.50689752536933
Q9Y676	MRPS18B	-0.263610266434778	3.22593888040483	-2.84087280271921	0.0396352382150966	0.574766769410442	-3.51225562603331
Q12906-7	ILF3	0.125438084982512	3.32231943338336	4.05667846629202	0.0114889046190743	0.544053661106456	-3.51640619405647
Q9H7X3	ZNF696	-0.215584913987332	3.29905608367686	-2.83823670854566	0.0397519663612143	0.574766769410442	-3.52039727391298
P18433	PTPRA	0.238112210853589	3.33335924287765	2.90286582209463	0.0369986322341323	0.573597063041259	-3.52083145127931
Q52MB2	C12orf68; CCDC184	-0.263164335310016	3.31776793190782	-2.71594908554199	0.0456172920892597	0.574766769410442	-3.5254005872138
Q9NUQ7	UFSP2	0.189482694179962	3.33961512832188	3.05563287202384	0.0313082255086119	0.571330856959487	-3.53504569669698
Q5JVF3	PCID2	0.126464714526229	3.34964389358064	3.35879007618939	0.0227288258605763	0.552474574369767	-3.5355373228058
Q15007	WTAP	0.144259652532428	3.34391547075462	3.29601222257047	0.0242577256770147	0.559182646354196	-3.54113711676644
Q9P2G9	KLHL8	-0.227281948193333	3.26846908045944	-2.8023747899312	0.041379070945307	0.574766769410442	-3.54162216322801
Q9C0H2-1	TTYH3	0.313298819269306	3.35440779747225	2.68837764067597	0.0470702287743107	0.574766769410442	-3.5419394486493
Q9UP95	SLC12A4	0.211512070488672	3.312025507535	2.81922787031329	0.0406052587904203	0.574766769410442	-3.54844012647703
Q96FV2	SCRN2	-0.260843591750009	3.33670082946111	-2.77555078653558	0.0426451797978263	0.574766769410442	-3.55082164479015
Q86X52	CHSY1	0.209419114536481	3.32645408329713	3.03362217938385	0.0320632406396105	0.571330856959487	-3.55287311033673
Q8WUM0	NUP133	0.162786485863881	3.32909993821944	3.57243414071165	0.0182979005779529	0.544754640063627	-3.55419002280409
Q8N9R8-2	SCAI	0.173335053148112	3.33855606673667	3.06793575784693	0.0308950362789119	0.571330856959487	-3.55909102308854
P61129	ZC3H6	0.21810259429753	3.32897385684803	2.87765411591482	0.0380462372705804	0.574766769410442	-3.56439981095717
Q9HC38-2	GLOD4	-0.296891043969729	3.30709021940584	-3.6092033391541	0.0176403933860481	0.544754640063627	-3.56713934320918
Q6N022	TENM4	0.222386537597751	3.33596874742449	2.97192938251247	0.0342921779165541	0.571330856959487	-3.57596729654142
Q9C0B5	ZDHHC5	0.174713678816128	3.33706002010302	2.95360745733894	0.0349876455301553	0.571330856959487	-3.58116601858951
Q15672	TWIST1	-0.446642963216052	3.30239180817169	-2.59916254352725	0.0521381697123	0.576473125197233	-3.58841894406538
Q6NYC1-3	JMJD6	-0.150804350471682	3.30902756340509	-2.99945965534503	0.033276466161791	0.571330856959487	-3.58911507727827
P01137	TGFB1	0.209311889566616	3.37439008452824	2.84505332851276	0.0394509133953173	0.574766769410442	-3.58962794879331
P51805	PLXNA3	0.235705623791547	3.33256763714895	2.76333590660786	0.0432361219348455	0.574766769410442	-3.59172188827199
Q49AG3	ZBED5	-0.178439042031551	3.29569227101568	-2.88613659590681	0.0376900725662991	0.574766769410442	-3.59183173248183
Q8NFY4	SEMA6D	0.304831402751587	3.32906752996141	2.6232649719734	0.0507114479906148	0.576473125197233	-3.59251707459322
Q9H2H9	SLC38A1	0.171591575643803	3.34231026584469	3.0533622790032	0.0313851685651075	0.571330856959487	-3.59267429850779
Q8NBP0-1	TTC13	0.191492037248976	3.33329398381603	3.09252659311331	0.0300876363308238	0.571330856959487	-3.59434902931629
O60216	RAD21	0.12504100879703	3.33308540197698	3.37512409011071	0.0223493887696637	0.550968272456415	-3.59486505868101
O75955	FLOT1	0.153528800551545	3.34251575006297	3.24204749259261	0.0256669240195995	0.563006468963826	-3.59959835529647
O76024	WFS1	0.229748394469391	3.37690653985872	2.7180986464916	0.0455061451173901	0.574766769410442	-3.59970870366728
P28290	SSFA2	0.176181562725191	3.32960272714263	3.08038881856958	0.0304831159325773	0.571330856959487	-3.60028831920862
Q92993-3	KAT5	0.213094302426557	3.29767385788475	2.94429024988861	0.0353474346257165	0.571330856959487	-3.60107366605773
Q6UWJ1	TMCO3	0.24820610823342	3.31425678087257	2.67869213171136	0.0475928678884276	0.576473125197233	-3.60317118238338
Q76L83	ASXL2	0.173575434809754	3.34086712328326	3.03258658272502	0.0320992708463119	0.571330856959487	-3.60557390286021
P49914	MTHFS	-0.367276612049999	3.30704236745859	-2.6967132466687	0.046625571442819	0.574766769410442	-3.60958771666454
Q99807-1	COQ7	-0.21080332210435	3.28512086273376	-2.83734700267372	0.0397914506488462	0.574766769410442	-3.61128296451234
Q8NBZ7-2	UXS1	0.210414318356886	3.33805053049748	2.78945765034686	0.0419834095432482	0.574766769410442	-3.61465745890288
P82921	MRPS21	-0.390982806129056	3.18498465902393	-2.55102100665981	0.0551235889830917	0.579167513245112	-3.61474388520731
Q2KJY2-1	KIF26B	0.159799406760487	3.29701664432284	3.07188287548876	0.0307637916793431	0.571330856959487	-3.61602866186045
P20020	ATP2B1	0.163509917049078	3.33722054991204	3.421420274605	0.0213129374866193	0.547791317820736	-3.61753056805781
Q6NUM9-1	RETSAT	0.198257994981008	3.33072481332958	2.99310030030074	0.0335080217644583	0.571330856959487	-3.62076118500852
P25325-2	MPST	-0.366116953231849	3.29979340335888	-3.01703259133414	0.0326459977147198	0.571330856959487	-3.62196772890257
Q9UNH7-1	SNX6	-0.106422564629785	3.32314767531392	-3.27545422726454	0.0247838321378634	0.5599867934246	-3.6228673121446
Q9ULX3	NOB1	-0.174761816582167	3.31163751482217	-2.99639827200387	0.0333877090492352	0.571330856959487	-3.62626964873709
Q96K58-2	ZNF668	-0.223212344795452	3.25139309377818	-2.90530892448666	0.0368988611718547	0.573597063041259	-3.63053574358155
Q96I24-1	FUBP3	0.147272152751851	3.3332182300955	3.50330058857432	0.0196124808762326	0.547128419941793	-3.63161373055083
P00747	PLG	0.348770720549269	3.36043713954884	2.54371030134755	0.055593348747452	0.579167513245112	-3.63302762856323
Q12849	GRSF1	-0.143301366625283	3.26004155783913	-3.34462206004822	0.0230639577591985	0.552474574369767	-3.63938765669617
Q8WUY3-3	PRUNE2	0.143208306774559	3.31867303345173	3.67341532883003	0.0165566554021361	0.544754640063627	-3.63997559172549
Q8N0S6-2	CENPL	0.275784422215653	3.34502897297	2.5939404055849	0.0524531497429188	0.576473125197233	-3.64020685127487
Q6QHF9-2	PAOX	-0.264257717179291	3.27828352583536	-2.64517048965713	0.0494524564270602	0.576473125197233	-3.64072927018202
Q8TB96	ITFG1	0.303126393462169	3.35307416204555	2.61551434896948	0.0511654363886118	0.576473125197233	-3.64554707300623
P31937	HIBADH	-0.220617508770253	3.27564216244037	-2.79332895189447	0.0418012514954887	0.574766769410442	-3.64721684780034
P33527	ABCC1	0.199858407521448	3.34458431050427	3.32988221188878	0.0234186607292023	0.555511728269957	-3.6475733956288
P04114	APOB	0.185361600664013	3.34336729594484	2.84581507978715	0.0394174310485967	0.574766769410442	-3.64782712037176
Q4KMQ2-2	ANO6	0.160569379704954	3.32393113274371	3.18805656730462	0.0271714903040706	0.567813672449573	-3.65109219844194
Q6T4R5-1	NHS	0.335314931857317	3.34531206222304	2.55105877727915	0.0551211734504909	0.579167513245112	-3.65290285085512
Q99653	CHP1	-0.360099224141849	3.33726517111288	-2.64801423594004	0.0492915898699451	0.576473125197233	-3.65429557957318
Q9UQ53-3	MGAT4B	0.258812065611263	3.34451401577626	2.70511516905794	0.0461821309754414	0.574766769410442	-3.65539339761361
O14786-1	NRP1	0.142509259755658	3.31285875291944	3.14392105616882	0.0284766579511857	0.569260001633295	-3.65569864891616
Q9Y3U8	RPL36	-0.275136348177603	3.26908947904254	-3.04642703225265	0.0316215175729768	0.571330856959487	-3.65645154223576
Q5T890-1	ERCC6L2	0.216086521982542	3.30792050991263	2.71799081083227	0.0455117137185947	0.574766769410442	-3.65654735526512
Q9P0K1-2	ADAM22	0.247515122599725	3.35318002907444	2.72403117602958	0.0452009648733514	0.574766769410442	-3.65819287755001
Q01101	INSM1	-0.678979678424116	3.34996362350535	-2.62585336409264	0.0505608363370636	0.576473125197233	-3.66886758273016
Q9HBH1	PDF	-0.285554413035475	3.30646596925264	-2.59616331668519	0.0523188137044098	0.576473125197233	-3.66955247702347
Q9Y2R5	MRPS17	-0.264298474486552	3.26510209089081	-2.68710803149519	0.0471383708930602	0.574766769410442	-3.67254570801676
P02545	LMNA	0.203417402102554	3.32106644290497	3.30029569970254	0.0241497262324924	0.559182646354196	-3.67532741938186
Q96SM3	CPXM1	0.216371261319985	3.33820428338841	2.72813681236853	0.0449911071856562	0.574766769410442	-3.67583016312654
Q8TE59	ADAMTS19	-0.54802409483912	3.45744969467749	-2.49272555423636	0.0589955921621508	0.579893610416486	-3.67732527848295
P78332	RBM6	0.147989093299959	3.34796847664533	3.42238709505637	0.0212918907212112	0.547791317820736	-3.67908887383024
Q92187-1	ST8SIA4	-0.226724456324378	3.28361893577464	-2.65046633874409	0.0491533471412256	0.576473125197233	-3.67960224465372
O95980	RECK	0.317787772028963	3.35787261017231	2.50441573382437	0.0581955895968458	0.579893610416486	-3.68019807600679
P08754	GNAI3	0.177988768340388	3.36030725881442	3.22437464359197	0.0261486554687491	0.56324339014856	-3.68229530090922
Q96E29-2	MTERFD1; MTERF3	-0.251617238261062	3.30171482857251	-2.84940892439489	0.0392598974596058	0.574766769410442	-3.68384192494228
Q96EK4	THAP11	-0.275380911215369	3.34505425722976	-2.62081330179479	0.0508545656866069	0.576473125197233	-3.68995952815606
Q9NQX6	ZNF331	-0.263007884980905	3.29971331621244	-2.60659447569824	0.0516935290694247	0.576473125197233	-3.69017946101734
Q9NYV6	RRN3	-0.150053808974782	3.2865881334131	-2.99120833759114	0.033577264298006	0.571330856959487	-3.69186280394817
Q9UL42	PNMA2	-0.21930204055363	3.32591249905676	-2.79856620464746	0.0415562346248286	0.574766769410442	-3.69313805939342
O43824	GTPBP6	-0.167070109657526	3.2976440717639	-2.92290823600008	0.0361890720044059	0.573597063041259	-3.69427630496604
Q8WVB6	CHTF18	0.153243055814421	3.32840059999855	3.12903336235874	0.0289329620168172	0.571330856959487	-3.69494811244439
P10253	GAA	0.14466984825024	3.33291779877402	3.03466822584819	0.0320268935541557	0.571330856959487	-3.69511798465928
Q14094	CCNI	0.523064236136764	3.27286943104733	2.46193212210907	0.0611617299723172	0.581893756626096	-3.69759277770081
O95425	SVIL	0.166302115817788	3.31569719832651	3.36702436251917	0.0225366258427737	0.550968272456415	-3.6991217879218
Q96F45	ZNF503	-0.260519389412572	3.30952355946486	-2.68629887442352	0.0471818573549878	0.574766769410442	-3.70072055383402
Q8NI77	KIF18A	-0.160491788794539	3.22987165944924	-3.16122806009099	0.027956499446416	0.567813672449573	-3.70324386981034
Q56A73	SPIN4	-0.217367211202323	3.3180661401354	-2.69362017263597	0.0467900183257681	0.574766769410442	-3.70529198271817
O00458	IFRD1	-0.182940808172255	3.23145084934289	-2.99746271132202	0.0333489822048712	0.571330856959487	-3.70661243545311
Q9H7D0-1	DOCK5	0.172487920887573	3.31185342805456	3.17830130354902	0.0274539790734274	0.567813672449573	-3.70875932421047
Q9HCM3-1	KIAA1549	0.154807291560234	3.32500503537981	3.01319682887302	0.0327824478806932	0.571330856959487	-3.71130281914585
Q8N350	C19orf26; CBARP	0.260383587458386	3.31479154569905	2.75181929476183	0.0438017219745999	0.574766769410442	-3.71274908982521
O00192	ARVCF	0.164467631866936	3.32966351040618	3.11041732760319	0.0295153282155242	0.571330856959487	-3.71463606561118
Q9UIS9-9	MBD1	-0.189635430972716	3.29987528132938	-2.70094995672671	0.0464013712076081	0.574766769410442	-3.71745561193573
O60318	MCM3AP	0.163838559668257	3.34802227693707	3.29862557977844	0.0241917692275738	0.559182646354196	-3.71926394832636
Q8WXX5	DNAJC9	-0.14110083771956	3.29446135963078	-3.18171923601426	0.027354623509463	0.567813672449573	-3.71948508354538
Q03252	LMNB2	0.146376321049522	3.33576786314147	3.5157057433845	0.0193687595916531	0.547128419941793	-3.72169124439693
Q9Y625	GPC6	0.222044160947495	3.32309977380993	2.80622636971987	0.0412007716061875	0.574766769410442	-3.7225305524603
P04183	TK1	-0.142655663417009	3.31979634167458	-2.90506113451284	0.0369089665020861	0.573597063041259	-3.72704610314326
Q8N1I0	DOCK4	0.172017480435163	3.31957467092454	3.17220397373743	0.0276322482359417	0.567813672449573	-3.72726823026401
P07996	THBS1	0.237226841266578	3.35736125934201	2.58512089596818	0.0529899313315521	0.576599543829097	-3.73236438102501
O14730	RIOK3	-0.225419056386127	3.25166960754404	-2.80333785726569	0.0413344068120478	0.574766769410442	-3.73272235171465
Q9Y2K6	USP20	0.196117540422867	3.32879301695485	2.69882379897244	0.046513732952242	0.574766769410442	-3.73309785390128
O75521	ECI2	-0.2085215137399	3.31187984021963	-2.79060330275723	0.0419294097740295	0.574766769410442	-3.73319780638637
Q15262-4	PTPRK	0.241103129702251	3.31451364548906	2.73524261261197	0.0446304750801908	0.574766769410442	-3.73549785278582
Q16822-1	PCK2	-0.209491943798075	3.29472748480037	-3.06621178165898	0.0309525597702558	0.571330856959487	-3.73585311470814
Q8WY21-2	SORCS1	0.148630028021284	3.32349337479002	2.91325013918521	0.0365766555327438	0.573597063041259	-3.73692961318465
Q96GV9	C5orf30	-0.231146753269044	3.28939674565282	-2.5889641235302	0.052755273050705	0.576473125197233	-3.73983485478083
P48509	CD151	0.335738573116637	3.38079988787512	2.69819966505429	0.0465467745893677	0.574766769410442	-3.74463139767871
Q8IXT5	RBM12B	0.165994735803049	3.3344786670675	3.36694757919171	0.0225384094179028	0.550968272456415	-3.74619135011644
Q8WV07	ORAOV1	-0.429530654317774	3.33074335816289	-2.54543934154965	0.0554818468957169	0.579167513245112	-3.7478395039037
Q9Y3C8	UFC1	-0.25983717227766	3.29168219237122	-2.64470618121105	0.0494787773077384	0.576473125197233	-3.75065924472004
P53384	NUBP1	-0.175824233289983	3.32026307164234	-2.74359988282381	0.0442104729513459	0.574766769410442	-3.75160137198041
Q9Y2J4-4	AMOTL2	-0.324573794413451	3.1367954224406	-2.41722386102609	0.0644645877590291	0.585213598468076	-3.75410183876993
Q9ULK0	GRID1	0.201261269023303	3.34586255926987	2.63684496798806	0.0499267991119123	0.576473125197233	-3.75522580597987
Q59EK9-1	RUNDC3A	0.168033023023353	3.31793798112555	2.82522909046388	0.040333658372396	0.574766769410442	-3.75795734744583
Q9NYI0-1	PSD3	0.158261082444047	3.32204478999512	3.10349828320183	0.0297351771684082	0.571330856959487	-3.7621981012984
Q76FK4	NOL8	0.182405500594539	3.33038645950863	3.25935003580807	0.0252051146563763	0.560275698062327	-3.76319878735164
Q9UBE0-1	SAE1	-0.121555197323946	3.32879414825745	-3.32864343652103	0.0234487554297489	0.555511728269957	-3.76386736112394
O14681	EI24	0.238239888282858	3.35739852494117	2.60649329397262	0.0516995541738886	0.576473125197233	-3.76622062441309
P55789	GFER	-0.232685049412107	3.31195004679916	-2.57717795693458	0.053478597601023	0.577220756495511	-3.76727490091303
P36776	LONP1	-0.199648196056936	3.24730342847594	-3.26705157255498	0.0250026276860539	0.560275698062327	-3.77182843626032
Q96A35	MRPL24	-0.21728556880517	3.30560120452349	-2.79599856990451	0.041676154932977	0.574766769410442	-3.77235319914882
Q14139-2	UBE4A	0.157844504870368	3.3376878496183	3.07410179042962	0.0306902900055036	0.571330856959487	-3.77315066967402
Q9GZT9-1	EGLN1	-0.153747889822533	3.30699053200228	-2.90930561764485	0.0367363003068687	0.573597063041259	-3.77738646937417
Q8IWU2	LMTK2	0.188259016307343	3.35041562998889	2.94382552531263	0.0353654897062255	0.571330856959487	-3.78145929736304
Q86VZ4	LRP11	0.250730088348308	3.29386781321088	2.54342315490111	0.055611890238207	0.579167513245112	-3.78212159369795
Q8IUH5-1	ZDHHC17	0.208835206859785	3.35137718516545	2.58798259235328	0.0528150928402507	0.576473125197233	-3.78295415236339
Q8N653	LZTR1	0.199085423607617	3.31553479446693	2.63170603019583	0.0502221214306744	0.576473125197233	-3.78335157830003
P01130	LDLR	0.152652279156539	3.31542114034763	3.02198949122263	0.0324706202418074	0.571330856959487	-3.78411100277845
Q92630-1	DYRK2	-0.230911486733186	3.32256723791022	-2.63114286696625	0.0502546033966317	0.576473125197233	-3.78569802272474
P80404	ABAT	-0.248603305572328	3.30159233319504	-2.86036361074954	0.0387840730235541	0.574766769410442	-3.79032092697632
Q9HAR2-4	LPHN3; ADGRL3	0.226827885585645	3.31354067683993	2.6581942067015	0.0487204967917154	0.576473125197233	-3.79439296928091
Q8IWL3	HSCB	-0.25773054900898	3.292030965657	-2.68283332836943	0.0473686145135525	0.574766769410442	-3.79450835822977
Q9H7Z7	PTGES2	-0.215258564954133	3.31477379826405	-2.83285131148021	0.0399916426471195	0.574766769410442	-3.79673470843534
Q96I59	NARS2	-0.1434990536639	3.29056192567329	-2.90440135594946	0.0369358887528141	0.573597063041259	-3.79825705618981
P23769-1	GATA2	-0.303386027294746	3.31487152520978	-2.40508609805216	0.065394843162311	0.585213598468076	-3.8006373228214
P22033	MUT	-0.166161048205798	3.28285910830728	-3.15535310273394	0.0281318434167075	0.567813672449573	-3.80114973821694
Q96CX6	LRRC58	-0.338943278207467	3.34342120891014	-2.47935423694787	0.0599255918528803	0.579893610416486	-3.80395576935272
Q99457	NAP1L3	-0.252752352199562	3.28592513831709	-2.45520273909693	0.0616467118320766	0.581893756626096	-3.80685977513371
O15439-1	ABCC4	0.188171669495527	3.33799488516665	2.98728482050203	0.033721376580598	0.571330856959487	-3.80777731817334
Q9HCC0-1	MCCC2	-0.262022011571	3.29216066924723	-2.9476085183776	0.0352188192509399	0.571330856959487	-3.80779246577023
Q7Z2E3-1	APTX	-0.216427333755531	3.32668121109046	-2.87081236122491	0.0383362826145642	0.574766769410442	-3.81165806057774
P54802	NAGLU	0.214253039817339	3.34194101525471	2.60732966479798	0.0516497739874287	0.576473125197233	-3.813722799313
Q16254	E2F4	0.233860478154839	3.31394608962313	2.88141891291762	0.0378876926147601	0.574766769410442	-3.81419750524528
P09017	HOXC4	-0.257030505879955	3.31023924756268	-2.51509699403865	0.0574751215993429	0.579893610416486	-3.8149109681348
Q9H7E9-2	C8orf33	-0.22586116360061	3.28445418562867	-2.50582830601267	0.058099737962205	0.579893610416486	-3.81524389200442
Q12841	FSTL1	0.196850920516512	3.35258216976863	2.59033213621154	0.0526720247560961	0.576473125197233	-3.81651944410459
Q9NRX2	MRPL17	-0.318246785112302	3.32217251395642	-2.5292383363664	0.0565364243951645	0.579167513245112	-3.81702182493871
Q13042	CDC16	0.131953268030025	3.33062477677333	3.05677276447733	0.0312696792087672	0.571330856959487	-3.81858833189467
Q96DA6	DNAJC19	-0.218183044413209	3.27608827395346	-2.79552725981488	0.0416982095574948	0.574766769410442	-3.82025574837319
Q24JP5-2	TMEM132A	0.214740081464661	3.32169581550289	2.70251542912877	0.0463188345025387	0.574766769410442	-3.82253184359382
O75410-1	TACC1	0.152248207268148	3.34140543866582	2.77252023136062	0.0427909431992837	0.574766769410442	-3.82258757764256
Q8WUB2	FAM216A	-0.533836856064956	3.16896760706688	-2.37629381011443	0.0676611017805189	0.585241326815686	-3.82374819832198
P34903	GABRA3	0.178243798263605	3.33797752166588	2.87617027256727	0.0381089313234594	0.574766769410442	-3.82380693792242
P52758	HRSP12; RIDA	-0.228342377072831	3.27606908335046	-2.5156928743184	0.0574352204922017	0.579893610416486	-3.82391813301152
Q8ND76	CCNY	0.226497697407541	3.32888035588944	2.53127654663781	0.0564025356709142	0.579167513245112	-3.82819605712819
Q7Z7M0	MEGF8	0.215202299058605	3.34475089523195	2.48494797769782	0.0595345788394789	0.579893610416486	-3.82874717040235
Q04828	AKR1C1	-0.312639275249566	3.33220482809845	-2.58980707689172	0.0527039591258412	0.576473125197233	-3.82948731436711
P17535	JUND	0.290098061752013	3.32894247821366	2.36370886262661	0.0686786347868097	0.585383537405773	-3.83033853078832
P40938	RFC3	-0.113564025638875	3.31738444049486	-3.00325268234188	0.0331392206546586	0.571330856959487	-3.83134797514734
P62256	UBE2H	-0.580286562288702	3.35509662546055	-2.54624669852397	0.0554298673281075	0.579167513245112	-3.8320547396913
Q9Y6N7-2	ROBO1	0.162182503188304	3.35590262044941	2.76320533578941	0.0432424883227763	0.574766769410442	-3.83264328350112
P45954	ACADSB	-0.222305301169662	3.28208329228911	-2.86212662711463	0.0387081049521004	0.574766769410442	-3.83292524486307
Q7RTN6-1	STRADA	0.221257017221834	3.31326924503945	2.48476468861215	0.0595473462992077	0.579893610416486	-3.83356399653507
Q15643	TRIP11	0.162442732724363	3.32594985491416	3.38276188089651	0.0221744682821652	0.550968272456415	-3.83637875097013
P32297	CHRNA3	-0.232470246669799	3.29953046921907	-2.69523481280074	0.0467040932257448	0.574766769410442	-3.83690093539002
P22694-1	PRKACB	0.200563356161688	3.32120586179616	2.65942054357243	0.0486522000217994	0.576473125197233	-3.84151920305315
P51116	FXR2	0.132785000282055	3.33179336223958	3.15614934032128	0.0281080054528001	0.567813672449573	-3.84277212987559
Q5TZA2	CROCC	0.133804141887764	3.31381622258311	3.10412082741111	0.0297153198795238	0.571330856959487	-3.8431542015042
Q99766-1	ATP5S	-0.264463683696886	3.25505011053244	-2.40094552057412	0.0657155527091076	0.585213598468076	-3.8456784291127
Q9UHY7	ENOPH1	-0.158138443523643	3.31112531301963	-2.72014771089836	0.0454004770686508	0.574766769410442	-3.84655872262359
Q8NBI6	XXYLT1	0.210433126769118	3.34376023425433	2.59500598668359	0.0523887061676234	0.576473125197233	-3.84750356540659
Q9UJX5-3	ANAPC4	0.179295719011863	3.30995548063178	2.96498588057463	0.0345538793117258	0.571330856959487	-3.84863746734972
Q9BU23-1	LMF2	0.205889632053807	3.34711255417915	2.59722273319467	0.052254925358622	0.576473125197233	-3.84987080582667
P62304	SNRPE	0.138778592905047	3.34481810732543	3.00310519817854	0.0331445451383514	0.571330856959487	-3.85033978749834
Q9HC62	SENP2	0.196658640693441	3.32473906467483	2.82737420893465	0.0402370727966994	0.574766769410442	-3.85321442494331
Q9P1U0	ZNRD1	0.374088996167461	3.33585056891971	2.2865603869716	0.0752944149677706	0.589852885511626	-3.8533893134457
P14635	CCNB1	-0.158919131222469	3.29795532600935	-2.69716055853934	0.0466018431932839	0.574766769410442	-3.85393903841251
P30520	ADSS	-0.140192370647463	3.32042823677505	-2.91835367292865	0.0363712663355342	0.573597063041259	-3.854729928331
Q9Y4D7-1	PLXND1	0.234374880599418	3.32679900097965	2.50926989567342	0.0578669361245264	0.579893610416486	-3.85878866466035
P98175-1	RBM10	0.145601764624057	3.3272643190638	3.22192206846515	0.0262163234021131	0.563245546082513	-3.86190105661102
P57087-1	JAM2	0.209091352095758	3.32389700692566	2.52657096770946	0.0567121748538749	0.579167513245112	-3.86359139221744
O15061-1	SYNM	0.134785301803287	3.34563415271886	3.11012130638419	0.0295246960827815	0.571330856959487	-3.87067965138243
P57682	KLF3	-0.292257604820169	3.286864032804	-2.30156004664226	0.0739555047723199	0.589852885511626	-3.87255157596177
Q9C0H9-5	SRCIN1	0.186438877299234	3.33562033562295	2.7188987219214	0.0454648533107084	0.574766769410442	-3.87407932829149
O60613-1	SEP15; SELENOF	-0.34774429216243	3.35456525170089	-2.44760765933321	0.0621991881436043	0.584370312796309	-3.8769143674567
Q9Y4W2	LAS1L	0.109720968137062	3.34257943874334	3.19770750784685	0.0268952895571269	0.567813672449573	-3.87766038788942
P06400	RB1	0.107200344604431	3.31380332384702	3.23014467038121	0.0259902446350976	0.56324339014856	-3.88040766759259
Q76N32	CEP68	0.211339057195033	3.34153912106417	2.57905885528895	0.0533624294211733	0.577220756495511	-3.88340761160994
P55265-1	ADAR	0.175271706990626	3.32629907384862	3.58920015594565	0.01799463329885	0.544754640063627	-3.88707334911128
Q9Y4E5-4	ZNF451	-0.266496493380849	3.2912317314968	-2.32495985008746	0.0719183785709785	0.589852885511626	-3.88792216237182
Q76N89	HECW1	0.183060049951916	3.3240518467443	2.70177748432121	0.046357720803812	0.574766769410442	-3.88822349278167
Q969Y2-2	GTPBP3	-0.186279182031152	3.27886346423168	-2.56778431284974	0.0540629940757041	0.57778092130137	-3.88899846671513
Q9NZC7	WWOX	0.185219645449104	3.32685950862282	2.74560677347402	0.0441102766442174	0.574766769410442	-3.89057534260706
Q86YT6	MIB1	0.19250074954659	3.30455241178826	3.0264438144687	0.0323139373641248	0.571330856959487	-3.89332451147306
P42857	NSG1	-0.253719379532038	3.28539571908199	-2.43332116919955	0.0632532633570354	0.585213598468076	-3.89385254417061
P78364	PHC1	0.200016869264048	3.37708886155992	2.79119657615585	0.0419014768375808	0.574766769410442	-3.89435491441539
Q9P0U3-1	SENP1	0.176836585905773	3.32045389977244	2.90816812145229	0.0367824840118311	0.573597063041259	-3.89490951573569
O75127	PTCD1	-0.164520987860811	3.25025239576358	-2.81753990963466	0.0406820226483097	0.574766769410442	-3.89657302305272
P51649-2	ALDH5A1	-0.257491717000564	3.22878318733092	-2.60279049014085	0.0519205854801225	0.576473125197233	-3.8982750189912
Q8TCN5	ZNF507	0.159760139747665	3.33197911186424	2.80446192475294	0.0412823446165131	0.574766769410442	-3.90005163628843
Q9NRN9	METTL5	-0.196470804599265	3.28201903131411	-2.61469286225637	0.0512138194981666	0.576473125197233	-3.90021431838199
Q04727-1	TLE4	-0.172144469112688	3.34249861688733	-2.95780944164171	0.034826743194666	0.571330856959487	-3.91332313789807
Q10570	CPSF1	0.132335846683567	3.3265062994428	3.27554082588476	0.0247815886714182	0.5599867934246	-3.91368799149288
Q6PJG2	ELMSAN1	0.164585805405819	3.32465869055054	2.91350606418289	0.0365663247509055	0.573597063041259	-3.91403012880544
O00299	CLIC1	-0.151943660245733	3.34096058943601	-2.78694771150897	0.0421019880012457	0.574766769410442	-3.91444704020068
Q16531	DDB1	0.0975057077225423	3.32835428293178	3.59706608672074	0.0178543603217523	0.544754640063627	-3.91513065949536
Q9UBH6	XPR1	0.229216467878623	3.34244777372461	2.41770214031725	0.0644282311682422	0.585213598468076	-3.91546438571218
P06454-1	PTMA	0.109111566096083	3.32949266825985	3.00183402473606	0.0331904774370956	0.571330856959487	-3.91792937390355
O60493-1	SNX3	-0.359999108189893	3.34033531773804	-2.72177167566865	0.0453169263465787	0.574766769410442	-3.92166572569072
P35998	PSMC2	-0.146046684091278	3.30614404442492	-3.17689450942386	0.0274949928744375	0.567813672449573	-3.92230537169006
Q9UM73	ALK	0.171533625460716	3.34977649718209	2.75549406755773	0.0436203498271862	0.574766769410442	-3.92574095924929
O94991	SLITRK5	0.159934439340593	3.37622672275066	2.57659369590627	0.0535147400090386	0.577220756495511	-3.92658996704216
Q9BT40	INPP5K	0.134513849707477	3.34034272865877	2.78582693383755	0.0421550591863174	0.574766769410442	-3.92830125115613
Q8TCC3-2	MRPL30	-0.236110456957696	3.23791128348829	-2.52556947920419	0.0567783183583326	0.579167513245112	-3.92840705110381
Q92785	DPF2	0.122098975389168	3.34584500766031	2.83447928968559	0.0399190183121534	0.574766769410442	-3.92953063503101
P30041	PRDX6	-0.0890461930776422	3.31954841210714	-3.1924982159661	0.0270439734565969	0.567813672449573	-3.93006948927074
P34947	GRK5	-0.127036957873323	3.30786900992496	-2.77110103156258	0.0428593962624513	0.574766769410442	-3.93452926932775
Q5T1C6	THEM4	-0.268368378580312	3.28811836001004	-2.50386866666092	0.0582327584630535	0.579893610416486	-3.93742857865491
Q5VUB5	FAM171A1	0.200172898237482	3.30897859858027	2.46061663239976	0.0612562041987786	0.581893756626096	-3.93948138672135
O43293-1	DAPK3	-0.20156081204712	3.28260838342992	-2.52615977593597	0.0567393217521751	0.579167513245112	-3.94013958382768
Q96SZ6-3	CDK5RAP1	-0.186955392404018	3.29225857526399	-2.85312695142207	0.0390976676551215	0.574766769410442	-3.94268576855258
Q9NY59	SMPD3	0.223555006029647	3.34281988884264	2.399954966579	0.0657925324217707	0.585213598468076	-3.94481891695881
P23470	PTPRG	0.220311255509427	3.34747402405225	2.45748719272051	0.0614815985945707	0.581893756626096	-3.9486812488296
Q9HCE5	METTL14	-0.195291107476146	3.29444335736099	-2.57593965253123	0.0535552313858712	0.577220756495511	-3.94946296574466
Q8N5N7	MRPL50	-0.371493356545129	3.31851972518722	-2.44456556598342	0.0624220041883604	0.584662726869856	-3.95059188787614
P05165-1	PCCA	-0.113582866497567	3.28557659823863	-2.99143219072151	0.033569063195965	0.571330856959487	-3.953684422655
Q96BN2	TADA1	-0.229243442154695	3.33085419438967	-2.61986619429878	0.0509099742052162	0.576473125197233	-3.95519532823037
Q8IU60	DCP2	-0.165178936534198	3.30755995531829	-2.74175927633822	0.0443025919877254	0.574766769410442	-3.95567672796757
Q92859	NEO1	0.159915547222984	3.34590271286684	2.77408341433467	0.0427156875217776	0.574766769410442	-3.95571281713919
Q12769	NUP160	0.136993440293417	3.3318657200846	3.14800403467812	0.0283529554762263	0.569260001633295	-3.95663295051418
Q86VP3-3	PACS2	0.208165263542501	3.32955875881462	2.3601568774403	0.0689688522071068	0.587256743614344	-3.95737365718572
Q4G0N4	NADK2; NADKD1	-0.167134165586547	3.28679043220768	-2.55720006424996	0.0547299805980456	0.579167513245112	-3.96227672106442
P02649	APOE	0.180310268297719	3.3496064199386	2.45436279635002	0.0617075432890438	0.581893756626096	-3.96241861055743
Q9NZ53-1	PODXL2	0.207441623949628	3.33137570207774	2.40243587605217	0.065599918038631	0.585213598468076	-3.96718442101438
P23025	XPA	0.237749191902148	3.38923708831484	2.42353787590418	0.0639864386998576	0.585213598468076	-3.96770674408425
Q9NRP4	ACN9; SDHAF3	-0.289682058425849	3.2917629329467	-2.29066732732671	0.074925209817992	0.589852885511626	-3.96842100875119
Q96EY5-1	FAM125A; MVB12A	-0.448953151952138	3.33791036616886	-2.39685894841086	0.0660337755716484	0.585213598468076	-3.96860521711546
Q9BQC6	MRP63; MRPL57	-0.334633430448887	3.21657331180518	-2.16237985335597	0.0874466890974291	0.600401339037267	-3.96984534430002
Q9BY89-1	KIAA1671	0.143215009257294	3.31760704704665	2.8358808384585	0.0398566141341396	0.574766769410442	-3.97115122866056
P17010-3	ZFX	0.275327921972336	3.31571308091508	2.20421290289089	0.0831308527943819	0.597945326025167	-3.97130689260333
Q16763	UBE2S	-0.121037330090747	3.31865663385196	-2.80223770324161	0.0413854330255429	0.574766769410442	-3.97225423583093
Q9UIQ6-1	LNPEP	0.177343113984933	3.32000634362381	2.84906995303502	0.0392747256437051	0.574766769410442	-3.9726194314933
P78345	RPP38	-0.184534831117429	3.30344066218696	-2.47525229859111	0.0602141291874764	0.579893610416486	-3.97262230706729
Q6NTF9-2	RHBDD2	0.354637746472805	3.33136546896145	2.14386238338721	0.0894337654332498	0.600401339037267	-3.97273037745237
O60783	MRPS14	-0.285311344334565	3.20250410797516	-2.19391774493888	0.0841711949474301	0.597945326025167	-3.97454426830131
O60524	NEMF	-0.112032413659181	3.28701107408328	-2.86939284432964	0.0383967731667207	0.574766769410442	-3.97681100131928
Q86WX3	RPS19BP1	-0.237291512372159	3.26795765670536	-2.58653746958009	0.0529033038358785	0.576473125197233	-3.9770107842561
Q70Z53	FRA10AC1	-0.170972565242407	3.30361409333839	-2.48130401423081	0.0597889773295746	0.579893610416486	-3.98151756587355
P21912	SDHB	-0.212493184270206	3.23874526148843	-2.7532438877376	0.0437313093994603	0.574766769410442	-3.98214914158126
Q13873	BMPR2	0.211816890046999	3.33860137320716	2.421950686501	0.0641062652160626	0.585213598468076	-3.98360986157244
Q96K49-1	TMEM87B	0.236684431324051	3.31676935438688	2.41586586936047	0.0645679391755454	0.585213598468076	-3.98425534583151
Q86U28	ISCA2	-0.227414313766973	3.32994683144108	-2.40196348279725	0.0656365461582532	0.585213598468076	-3.98794612584737
Q13427	PPIG	0.160522336659013	3.33879833099324	2.64663432078367	0.049369576547083	0.576473125197233	-3.98855260253476
Q15131-1	CDK10	0.172791888511782	3.30356157909518	2.45645485809087	0.0615561520224123	0.581893756626096	-3.98925281327684
Q6SPF0	SAMD1	0.142677773602566	3.34851753519356	2.61573867261224	0.0511522332552852	0.576473125197233	-3.99024670135872
Q9H3Z4	DNAJC5	0.168326227005299	3.34426463181161	2.78732840280252	0.0420839785708309	0.574766769410442	-3.99312631310853
Q9H583	HEATR1	0.151735721762307	3.33623467469848	3.32300185019073	0.0235863749205087	0.555511728269957	-3.99516434401029
Q9Y244	POMP	-0.757106859017226	3.34231160188139	-2.32292221853481	0.0720933098404279	0.589852885511626	-3.99632456906737
Q8IZL8	PELP1	0.131692529430388	3.33355485712608	2.95514508385092	0.0349286691803229	0.571330856959487	-3.99650556936095
Q8NDX5-7	PHC3	0.201085345023748	3.35930611896435	2.37145790340603	0.0680501304621003	0.585241326815686	-3.99787517220421
Q96E35	ZMYND19	-0.423651139086976	3.33630882859364	-2.10638488229534	0.0936056423560178	0.600401339037267	-4.0003141207933
B1AJZ9-3	FHAD1	-0.284119654662999	3.33681160741458	-2.24458177968355	0.0791839070909008	0.59650499184859	-4.00112958876793
Q86Y79	PTRH1	-0.32138419527343	3.28649437802769	-2.24293785577329	0.0793406040349382	0.59650499184859	-4.00417958185029
Q15428	SF3A2	0.155586339612429	3.36186088120073	3.02648030126933	0.0323126574783886	0.571330856959487	-4.0045655421667
Q13129	RLF	0.114855585418689	3.33195993535422	3.07321640970269	0.0307195942775024	0.571330856959487	-4.00856842819659
P32780	GTF2H1	0.123692541330757	3.35116674647912	2.83480271938719	0.0399046077812797	0.574766769410442	-4.00920830627008
Q14135-4	VGLL4	-0.164112001845557	3.29340602267692	-2.4930069733519	0.0589761912424313	0.579893610416486	-4.012247766568
Q9NUJ1	ABHD10	-0.243835329146043	3.2967614930195	-2.72249612482649	0.0452797100681101	0.574766769410442	-4.01236524883979
Q9UKN8	GTF3C4	0.0833465806926089	3.32511910584756	3.25683853367181	0.0252715525997403	0.560275698062327	-4.01257352342141
P62487	POLR2G	-0.357304446843422	3.34694993292137	-2.48662550576264	0.0594178669615388	0.579893610416486	-4.01329507232181
Q86UL8-1	MAGI2	0.239382378429461	3.32188881936972	2.262367974319	0.0775098835010501	0.593317161491968	-4.01360322667275
Q8NFZ8	CADM4	0.178714314364423	3.33647399143382	2.56362765438363	0.0543238506468708	0.578907235348637	-4.01392326841615
O15394	NCAM2	0.214081139743315	3.33242131632793	2.83383852385674	0.0399475852041327	0.574766769410442	-4.02299146879058
Q9NQ50	MRPL40	-0.217570214869715	3.2305949633454	-2.48540381027801	0.0595028398041366	0.579893610416486	-4.02303567508937
P62280	RPS11	-0.264964547700172	3.26085829713264	-3.00020262403332	0.0332495320859584	0.571330856959487	-4.02318981631324
Q53HC0	CCDC92	0.168009844184488	3.32701867769951	2.57353798678528	0.0537042093951814	0.577220756495511	-4.02334299725403
Q4ZG55-1	GREB1	0.175660548273611	3.31356039418728	2.74972722674288	0.0439053563632068	0.574766769410442	-4.02467665428414
Q9H773	DCTPP1	-0.217437252922813	3.30981261123318	-2.67095814985768	0.0480148643828991	0.576473125197233	-4.02629972633745
Q96H55-1	MYO19	0.147036618982733	3.31200856410402	2.66264082538463	0.0484733658994276	0.576473125197233	-4.02654619108034
Q96L50	LRR1	-0.178720161096313	3.30400589382621	-2.3986155757033	0.0658967792639443	0.585213598468076	-4.02727785489323
Q8ND90	PNMA1	-0.241408517406837	3.32958525789117	-2.62107128887638	0.0508394843540415	0.576473125197233	-4.03316419985868
Q0VDG4-1	SCRN3	-0.236709492838228	3.28438101826938	-2.42241311049719	0.0640713285475137	0.585213598468076	-4.0340475239938
Q8WWZ7-1	ABCA5	0.312396219225953	3.28118904078999	2.20751162161373	0.082800462192754	0.597945326025167	-4.03544427691091
Q6P1R3-1	MSANTD2	0.227668387718254	3.30865851361114	2.38712452171898	0.0667986419184026	0.585241326815686	-4.03713791719855
Q8WUZ0-2	BCL7C	0.21288861443227	3.33535956158208	2.27136439268961	0.0766778372301894	0.592393159220944	-4.03877948908666
Q92791	LEPREL4; P3H4	0.183769601026813	3.33881930490055	2.5227700356558	0.0569636622584785	0.579167513245112	-4.04084529405609
Q96CS4	ZNF689	-0.380852271821403	3.27597779326473	-2.42700304388756	0.0637256883860889	0.585213598468076	-4.04244182923238
P78357	CNTNAP1	0.235842428395519	3.32030915686055	2.31231157122688	0.0730117842847665	0.589852885511626	-4.04298034975446
O43488	AKR7A2	-0.267175721230534	3.31910519932005	-2.59908832506408	0.0521426315140389	0.576473125197233	-4.04330030421347
P54709	ATP1B3	0.225250925361306	3.32134333952776	2.63379719550059	0.0501017126339834	0.576473125197233	-4.04457376050453
P30049	ATP5D	-0.256472046616598	3.26089727446104	-2.1550861999276	0.0882236209184961	0.600401339037267	-4.0485110812766
P15735-1	PHKG2	0.159197131374634	3.32660026360075	2.56634576047089	0.0541531144550534	0.578003024452401	-4.04948052047015
P62753	RPS6	-0.330168107954086	3.27636122386147	-2.94030651138496	0.0355025470740016	0.571879593358839	-4.04999388080953
Q9Y639-2	NPTN	0.150108856838911	3.34769966618972	2.65409542239666	0.0489495435671117	0.576473125197233	-4.05153777223992
Q6PGN9-1	PSRC1	-0.212131962043692	3.25966510680141	-2.302472635033	0.0738748869763272	0.589852885511626	-4.05719899228991
P53701	HCCS	-0.18489159425188	3.29165512226075	-2.59897134018181	0.0521496651739646	0.576473125197233	-4.05742919987271
Q9H2W6	MRPL46	-0.383058592556552	3.31042128418545	-2.52413130075934	0.0568734527826078	0.579167513245112	-4.05952407910383
Q8TDM0-3	BCAS4	-0.405372244429825	3.32493284806417	-2.17087686904822	0.0865508659112195	0.597945326025167	-4.06052834825129
Q9P2R7	SUCLA2	-0.141115751697128	3.2843816227591	-2.90523342638945	0.0369019397913514	0.573597063041259	-4.06054714341737
Q5VU97-1	CACHD1	0.219500829203764	3.31078619644113	2.21230094070132	0.0823233051037175	0.597945326025167	-4.06284034622868
P34897-1	SHMT2	-0.335012176994791	3.30003702620531	-3.2049423365295	0.0266903416947807	0.567813672449573	-4.06548448305782
Q9BYT8	NLN	-0.107573762992058	3.31695041387147	-2.99158960567399	0.0335632974905518	0.571330856959487	-4.06578558309699
P02774-3	GC	0.350911758356346	3.32347248932211	2.20879744437304	0.082672063016806	0.597945326025167	-4.0666693305137
Q9H6X2	ANTXR1	0.235531693959054	3.31440752355928	2.27394804122017	0.0764406853797434	0.592202187105522	-4.06751159644367
Q9HBK9	AS3MT	-0.117596762689326	3.33776601841069	-2.88754982900678	0.0376311002975425	0.574766769410442	-4.07058260129587
Q8IUC8-1	GALNT13	0.209733991628357	3.37243684155927	2.37948614571927	0.0674056292526958	0.585241326815686	-4.07128347325481
O75146	HIP1R	0.100014258139226	3.34420887374704	2.91830982478921	0.0363730254137237	0.573597063041259	-4.07349485793823
O43809	NUDT21	-0.340542268715363	3.35740870127998	-2.40812454166989	0.0651605947039543	0.585213598468076	-4.07378496520617
Q8N4Q0	ZADH2	-0.205899668020628	3.30589546830023	-2.46227837412374	0.0611368900216341	0.581893756626096	-4.07426198378563
Q9H4G0-2	EPB41L1	0.186705605677555	3.31287477490519	2.74250685160805	0.0442651512349721	0.574766769410442	-4.07657564899786
Q6PK04	CCDC137	-0.314830334157481	3.24337241851036	-2.40854725653793	0.0651280787467107	0.585213598468076	-4.07689113109938
Q9NX01	TXNL4B	-0.472239575362368	3.35918996955561	-2.23085807656434	0.0805024131273588	0.59650499184859	-4.07728520015456
O95343	SIX3	-0.334235085951753	3.32930661840046	-2.43111796045631	0.0634175642364198	0.585213598468076	-4.07782205245296
Q9Y6J0	CABIN1	0.16332986176544	3.32869481330281	3.02444251034912	0.0323842275731701	0.571330856959487	-4.07904571912726
P54198	HIRA	0.161780414400288	3.32981940191176	2.87710913390828	0.0380692498247248	0.574766769410442	-4.07945339445815
O94854	KIAA0754	0.185102600136258	3.34418458803603	2.39108571212535	0.0664862296745232	0.585241326815686	-4.07953808969286
Q9NPC7-1	MYNN	-0.222834314937539	3.28046862387314	-2.2509768788026	0.0785775235496504	0.59650499184859	-4.08030110752214
Q6GMV3	PTRHD1	-0.247933537879484	3.20746385265123	-2.41977618868472	0.0642708325046284	0.585213598468076	-4.08324944225973
Q9UK23	NAGPA	0.189283186944789	3.33788286456197	2.31428207619015	0.0728402522460807	0.589852885511626	-4.0837398688377
P35270	SPR	-0.315609005411163	3.29600260137847	-2.21076887402615	0.0824756192859443	0.597945326025167	-4.0847121753964
Q9UBW7	ZMYM2	0.143260459625909	3.35669910473964	3.20102059088143	0.0268012139997344	0.567813672449573	-4.08672518553688
Q96E11	MRRF	-0.195752826444721	3.2397982168693	-2.41465861235453	0.0646599719074278	0.585213598468076	-4.08706724674882
Q96EE3-1	SEH1L	0.125883562754388	3.31750744892625	2.94955714331604	0.0351435381776351	0.571330856959487	-4.08746413373736
Q16352	INA	0.128782277194629	3.36084681768105	2.72980101203169	0.0449063538331445	0.574766769410442	-4.08778591454036
Q7Z589-5	C11orf30; EMSY	0.149973850522286	3.32631581932715	2.95214123869114	0.0350439881636615	0.571330856959487	-4.08841904692626
Q9Y5Q8-3	GTF3C5	0.112184719726761	3.31834426435375	2.97369803320282	0.0342258770663034	0.571330856959487	-4.08885191768338
P11182	DBT	-0.188179572520186	3.29134797126162	-2.50786318049675	0.0579619664767337	0.579893610416486	-4.08942382259226
Q00610-2	CLTC	0.083488303779826	3.33167967018696	3.70653199808768	0.0160280113933177	0.544053661106456	-4.08948209741124
P35659-1	DEK	0.12100840935806	3.34682574647619	3.06771826318106	0.0309022866550905	0.571330856959487	-4.09179358256353
Q96PE7	MCEE	-0.199628503251373	3.2720431165123	-2.32328668151201	0.0720619864606679	0.589852885511626	-4.09325299039122
Q9Y6Q3-1	ZFP37	-0.253066503670961	3.29639381866063	-2.19053945219561	0.0845156386047511	0.597945326025167	-4.09449716340515
O00754	MAN2B1	0.112649196297337	3.3330421539306	2.76103015876738	0.0433487009552042	0.574766769410442	-4.09576608423461
Q15973	ZNF124	-0.209896492985065	3.31150752450556	-2.19912918624216	0.0836428210423231	0.597945326025167	-4.09859232300875
Q8TBF5-2	PIGX	0.260039623417141	3.36574690366499	2.10390687204591	0.093888756647882	0.600401339037267	-4.09935537841231
Q96T76-8	MMS19	0.0944689554723064	3.32028998637088	2.96020988915781	0.0347352018970335	0.571330856959487	-4.10454206395392
Q5T1H1-3	EYS	-0.212393273937743	3.30302880931777	-2.25951587052573	0.0777757109669598	0.594197532187865	-4.10547071800065
Q13449	LSAMP	0.213255037128576	3.33085517789296	2.63631229086996	0.0499573205673684	0.576473125197233	-4.10660071073705
Q69YN2-1	CWF19L1	-0.192751583492039	3.31706151071908	-2.92654747730613	0.0360442353659783	0.573597063041259	-4.10871416230362
P57060	RWDD2B	0.281992208268693	3.31222425327417	2.0795425411926	0.0967217714575775	0.600401339037267	-4.11088447949305
Q9H1E3	NUCKS1	0.211274165476245	3.33620623187227	2.42298218654432	0.0640283629652622	0.585213598468076	-4.11145105813156
Q8N9N7	LRRC57	-0.42921992128084	3.32816583181896	-2.50511718591797	0.0581479699284276	0.579893610416486	-4.11275197885155
P61371	ISL1	-0.124303999765495	3.29880528137949	-2.60947100032868	0.0515225664807791	0.576473125197233	-4.1136761041527
P11177	PDHB	-0.299125611414398	3.27968973082369	-2.79769308149929	0.0415969698414517	0.574766769410442	-4.11684695521634
Q9Y5J6	FXC1; TIMM10B	-0.400187877462916	3.28324515893685	-2.11163070050772	0.0930093209308101	0.600401339037267	-4.119309380349
O15488-1	GYG2	0.220084312906724	3.30756701035263	2.16915730717362	0.0867313536313477	0.597945326025167	-4.11964304890002
P48200	IREB2	-0.306113869696607	3.34011087882418	-2.68428698593836	0.0472901768404643	0.574766769410442	-4.12077415763605
Q15459	SF3A1	0.0739553294739033	3.35453001962056	3.32282968574178	0.0235905892283547	0.555511728269957	-4.12310535961691
P49366-1	DHPS	-0.139112908684188	3.30538777708313	-2.53048082922844	0.0564547639484495	0.579167513245112	-4.12470120683297
P08069	IGF1R	0.159485560713459	3.33269004524666	2.65133833870159	0.0491042906351877	0.576473125197233	-4.12516856835706
Q13126-1	MTAP	-0.166772375876154	3.35398195729895	-2.65848631920053	0.0487042188386037	0.576473125197233	-4.12800189752221
Q52LR7	EPC2	0.161828963701915	3.3327016793921	2.6879379632592	0.0470938145338652	0.574766769410442	-4.12838392407686
O75064	DENND4B	0.20881052170233	3.30520959219062	2.23112784531052	0.0804762666660304	0.59650499184859	-4.13044619772936
Q9NZ56	FMN2	0.171929480510078	3.34154837400966	2.49287307823829	0.0589854210368704	0.579893610416486	-4.13095950903273
P98153-1	DGCR2	0.222268172495072	3.33990962383548	2.12545717519787	0.091457040179253	0.600401339037267	-4.13129419574612
Q9Y462-3	ZNF711	0.194012559879056	3.29715739233269	2.29764299368821	0.0743026280396699	0.589852885511626	-4.13210465093775
Q9NYU1	UGGT2	0.147210576619229	3.34192595595324	2.52055471872265	0.0571108080479225	0.579167513245112	-4.13419606763301
Q9Y2K2	SIK3	0.175470663960062	3.320994911673	2.56072063903675	0.0545071153788391	0.579167513245112	-4.13440632724943
Q96H86	ZNF764	-0.209158295879428	3.24564441169593	-2.1763279817625	0.0859813834222332	0.597945326025167	-4.13444831177032
P31040	SDHA	-0.136468712508883	3.24821313000065	-2.91864338826562	0.0363596460971999	0.573597063041259	-4.13453040334845
O14939-1	PLD2	0.134566877732286	3.33529038505073	2.61030522879137	0.0514731030955177	0.576473125197233	-4.13583586058935
P30626-1	SRI	0.331332053452329	3.33862178877709	2.46510847620883	0.060934276988227	0.581893756626096	-4.13660784254016
Q8WUH2	TGFBRAP1	0.131808633191234	3.31321989016327	2.54643475771377	0.0554177673931805	0.579167513245112	-4.1366193449276
P15104	GLUL	-0.159612983174067	3.30970001513014	-2.42411571701529	0.063942875242235	0.585213598468076	-4.1393271726707
Q7L8L6	FASTKD5	-0.135861616086382	3.27100448453388	-2.83322691442307	0.0399748737361981	0.574766769410442	-4.14033234520079
Q9BYC9	MRPL20	-0.177820525212603	3.28333393148123	-2.33274506074481	0.0712542774873843	0.589852885511626	-4.14125534414889
Q9H7H0-3	METTL17	-0.167066110098944	3.27447078513533	-2.34723936477884	0.0700356728778039	0.587341417615064	-4.14436058354604
Q02153	GUCY1B3	0.159302899360424	3.33873879828138	2.37405696670655	0.0678407424003658	0.585241326815686	-4.14437071813604
O43490-1	PROM1	0.162295908068123	3.31978153469153	2.35303664766686	0.0695546719667609	0.587341417615064	-4.14577198716311
P62699	YPEL5	-0.450619123748658	3.34463177072903	-2.06965302092967	0.0978976797590198	0.600401339037267	-4.14834256644592
P05091	ALDH2	-0.152772040636847	3.28097101817782	-2.86555262664734	0.0385609591887981	0.574766769410442	-4.14844790774845
Q13111-1	CHAF1A	0.127225077557018	3.34641000318607	2.97926112449026	0.0340182815279277	0.571330856959487	-4.14873182580019
Q49MG5	MAP9	-0.180522455480869	3.27860165092047	-2.36658591354511	0.0684445447655917	0.585383537405773	-4.14992917365897
Q9Y6M9	NDUFB9	-0.196850963826841	3.26838077985464	-2.28069697579553	0.0758249636209407	0.589852885511626	-4.15048189660252
Q9Y2G3	ATP11B	0.152441751292661	3.36433567461074	2.38640211265755	0.0668557907373363	0.585241326815686	-4.1525506143191
Q9UHB4-2	NDOR1	0.201725199166754	3.31136066939398	2.15097492787224	0.0886648360957438	0.600401339037267	-4.15416666486518
Q9Y2Z9-1	COQ6	-0.235938929547254	3.29569180502062	-2.38264787437525	0.0671536494212893	0.585241326815686	-4.15486013400955
P50749	RASSF2	-0.186765974892541	3.33911897416067	-2.49428313003084	0.0588883020568351	0.579893610416486	-4.15531359494694
Q9BVL2	NUPL1; NUP58	0.154430189871567	3.33069814876268	2.57191675561798	0.0538050366995794	0.577220756495511	-4.1579268716824
Q9Y259-1	CHKB	0.19101073362359	3.30583898561861	2.35295032519604	0.0695618075510047	0.587341417615064	-4.15827186976407
Q8NDV1-1	ST6GALNAC3	0.212233510756911	3.3061601318094	2.14074397171848	0.0897731545656511	0.600401339037267	-4.15901653300909
Q9UL12	SARDH	-0.330967100981359	3.29533242700439	-1.95072331160755	0.11329443755723	0.611287479788836	-4.16196524008736
O14656	TOR1A	0.161348573411678	3.34161490310883	2.48535068313841	0.0595065380149513	0.579893610416486	-4.16279830786927
Q8NB14	USP38	0.146301731913867	3.31857530495196	2.49195810541741	0.0590485356650671	0.579893610416486	-4.16285145966061
P07203	GPX1	-0.43985552437739	3.32731437054639	-2.02297648879861	0.103657422673333	0.605103834317159	-4.16355684554683
Q5VT25-2	CDC42BPA	0.14923116482302	3.326050964052	2.85662461773152	0.0389457432404014	0.574766769410442	-4.1644463992033
Q9BQP7	C20orf72; MGME1	-0.16471566119534	3.25104188807443	-2.7776315450038	0.0425454228888014	0.574766769410442	-4.16457290629792
Q9UDW3	ZMAT5	-0.388192850900449	3.33606929144597	-2.21310810227352	0.0822431817117038	0.597945326025167	-4.1650430384288
Q15126	PMVK	-0.350110674296135	3.32787594777737	-2.28205901599936	0.0757013576943307	0.589852885511626	-4.16615050065181
P05141	SLC25A5	-0.211422393956416	3.26573773567914	-2.46044471050772	0.061268562973567	0.581893756626096	-4.16710506679439
O95159	ZFPL1	0.156283240798847	3.35295724823062	2.40693780436563	0.0652519760613968	0.585213598468076	-4.17214348945294
Q96EL2	MRPS24	-0.212343325293983	3.24003355457229	-2.19222347445456	0.084343749107086	0.597945326025167	-4.17246990547662
Q13084	MRPL28	-0.174024285157733	3.29306235932713	-2.32803319617342	0.0716554080779869	0.589852885511626	-4.17309364505612
Q6AI39	GLTSCR1L; KIAA0240; BICRAL	0.221782358407201	3.3503075759417	2.09522203342152	0.0948882747370905	0.600401339037267	-4.17572631612441
Q14249	ENDOG	-0.1324096489155	3.29723142771473	-2.51077289453073	0.0577655919866531	0.579893610416486	-4.17644009082984
Q96GQ5-1	C16orf58	0.195927609713592	3.3222714772815	2.52062906930146	0.0571058627064481	0.579167513245112	-4.17958886114972
P51553-1	IDH3G	-0.152743604890809	3.282778213335	-2.42788429401801	0.0636595620355088	0.585213598468076	-4.18109269260061
P16157-21	ANK1	0.137236992942481	3.32185185650109	2.59272805505486	0.0525265769014966	0.576473125197233	-4.18122564717684
Q9BUE6-2	ISCA1	-0.172371076019404	3.25633043579644	-2.47639268624895	0.0601337585813912	0.579893610416486	-4.18177177821739
E7ETH6	ZNF587B	-0.322623848572779	3.28552375534873	-1.90116542901391	0.120448287794666	0.61592197485254	-4.1857758512694
Q96PD2-2	DCBLD2	0.198002590017169	3.35409712814434	2.18680622103986	0.0848980442525138	0.597945326025167	-4.1871525043395
Q9BU61-1	NDUFAF3	-0.344406607724784	3.32200408189524	-2.08456915393365	0.0961298834888432	0.600401339037267	-4.18836295329336
O75970	MPDZ	0.120999887774716	3.32102144566177	2.88505849473295	0.037735130482496	0.574766769410442	-4.18903347565211
Q9UHG2	PCSK1N	0.38918535341168	3.34009902082539	1.97872750806009	0.109451236541148	0.61045378725435	-4.1892143279503
Q9BTX1	NDC1; TMEM48	0.177249994461782	3.3239309994127	2.54224880593449	0.0556877912371717	0.579167513245112	-4.19009235759201
Q8IWV8	UBR2	0.129421394198811	3.30738278949702	2.89739002067937	0.037223362548882	0.574766769410442	-4.19083869464684
Q5SZQ8	CELF3	-0.135836597166863	3.31275360682827	-2.59267257099611	0.0525299400833729	0.576473125197233	-4.19155682320293
Q9P2S2-1	NRXN2	0.168292041265315	3.33713318787891	2.28812986088329	0.0751530890148749	0.589852885511626	-4.19230258220616
O95168-1	NDUFB4	-0.160013873183333	3.29639156394207	-2.31061953915683	0.0731594274020647	0.589852885511626	-4.19293243178857
P19086	GNAZ	0.194600184580355	3.36063796794163	2.31382930594767	0.0728796268134595	0.589852885511626	-4.19447583859964
Q9NVV4	MTPAP	-0.159390593948296	3.26935838035441	-2.52141481215937	0.0570536289447784	0.579167513245112	-4.1970706075236
P45973	CBX5	0.0908817013435632	3.34773641008857	2.96588168600763	0.0345199893542613	0.571330856959487	-4.19752397786304
O15069	NACAD	0.154390384242895	3.33917835008661	2.73401145990126	0.0446927253357507	0.574766769410442	-4.19834585743352
Q9NPA3	MID1IP1	-0.646528103881504	3.34649931867748	-2.43901579534818	0.0628307644576372	0.585213598468076	-4.20108932026445
Q12767-2	KIAA0195; TMEM94	0.190574677105207	3.33217252971675	2.29463590176871	0.0745703179504935	0.589852885511626	-4.20161277856768
O00462	MANBA	0.150277225687869	3.3159629490054	2.46309672622085	0.0610782261032779	0.581893756626096	-4.20281491734584
Q8NCN5	PDPR	-0.12317952339105	3.21674580642196	-2.71298420870455	0.0457710961106283	0.574766769410442	-4.20299328731978
Q9UHW9	SLC12A6	0.211311555991032	3.3409296128038	2.11277159528737	0.0928801694969802	0.600401339037267	-4.20331555633626
Q13308-6	PTK7	0.163192171797612	3.33236670518107	2.81295321800413	0.0408914399596598	0.574766769410442	-4.20590208573952
P13637-3	ATP1A3	0.122167225784438	3.33480499884315	2.85801828827365	0.0388853935903972	0.574766769410442	-4.20629057283587
Q9Y216	MTMR7	0.144882239249207	3.33289632996364	2.41707825169335	0.0644756607939992	0.585213598468076	-4.20693799171806
Q16288-2	NTRK3	0.224543154039677	3.33344350692058	2.05572989879815	0.0995791634221823	0.600401339037267	-4.20698167680825
Q9UBS4	DNAJB11	0.09934848604198	3.3377044998691	2.72428643140231	0.0451878856571365	0.574766769410442	-4.20794671031802
Q8NA72	POC5	-0.176762596351571	3.27687831701203	-2.56973053606312	0.0539413350899715	0.577220756495511	-4.20800721283873
Q8TEW0	PARD3	0.115450912020565	3.31411630792229	2.92900936872252	0.0359466277739406	0.573597063041259	-4.20811702177614
Q8N3P4-1	VPS8	0.111851966334191	3.32340866745961	2.82619989814955	0.0402899146906916	0.574766769410442	-4.20841911138013
Q68DA7-1	FMN1	0.162863303000644	3.24574130220018	2.26960005351653	0.076840245242489	0.592393159220944	-4.20914882273952
Q96QT6-1	PHF12	0.138105648749811	3.35020962198291	2.59763600127225	0.0522300266941986	0.576473125197233	-4.20940026021597
Q13601	KRR1	-0.194704913028482	3.28262871270879	-2.46122844210603	0.061212245973692	0.581893756626096	-4.21001693238548
P49755	TMED10	0.121106486232045	3.34630028741046	2.53646802769311	0.0560630965203827	0.579167513245112	-4.21003162331167
P19823	ITIH2	0.321336022452513	3.33034593307503	2.09117849471763	0.0953575210302553	0.600401339037267	-4.21015000883094
Q16706	MAN2A1	0.156503175117992	3.31871216910873	2.34922376100786	0.0698706185243175	0.587341417615064	-4.2108017688106
Q96DC8	ECHDC3	-0.22241662286	3.28079623333032	-2.22440700544472	0.0811304151247953	0.597945326025167	-4.21305904721299
Q9UMS0	NFU1	-0.236334738900986	3.28414295533306	-2.22070765316746	0.0814929366022135	0.597945326025167	-4.21450831996451
Q96D53-1	ADCK4; COQ8B	-0.157909745833535	3.26559215152467	-2.47483928631864	0.0602432661493135	0.579893610416486	-4.2158240896509
Q8N6C5-4	IGSF1	0.249471594283077	3.28470563923118	2.01888160658121	0.104179663827103	0.606220019604652	-4.21607381454715
Q53HV7-1	SMUG1	-0.350438761664845	3.37331730939724	-2.00570041986962	0.105879798043334	0.608070400210579	-4.2171096510825
Q96IK5	GMCL1	0.278754523010029	3.31533282766917	1.90800104972876	0.11943395089545	0.61592197485254	-4.22024514051762
Q9H553-1	ALG2	0.147313035894891	3.35893389263701	2.39467617636912	0.0662044424975966	0.585241326815686	-4.22193991096794
Q6DKJ4	NXN	-0.233801293742724	3.3172802959832	-2.29085047962275	0.0749087908531835	0.589852885511626	-4.22555323303616
P57737-3	CORO7-PAM16; CORO7	-0.180571464358082	3.30369956149318	-2.75613226219835	0.0435889371278034	0.574766769410442	-4.22595441609039
Q719H9	KCTD1	-0.348284441209855	3.34476254472176	-2.05277276278684	0.0999402481469299	0.600401339037267	-4.22654568952829
Q8NEN9	PDZD8	0.12913302252705	3.33393560293242	2.60171873815983	0.0519847578150697	0.576473125197233	-4.22852343890145
Q9ULC4-3	MCTS1	-0.149141946294166	3.32023422175716	-2.4700690225392	0.0605809275389514	0.581800244198962	-4.22888843963809
Q86XX4-2	FRAS1	0.175689257762504	3.33050026885711	2.22541576461864	0.0810318644940507	0.59790990065689	-4.23005807571706
Q15014	MORF4L2	-0.141414619067113	3.2767207640246	-2.48235349678427	0.0597155860800261	0.579893610416486	-4.23129771577868
P80303	NUCB2	0.192136858368076	3.30798086488434	2.69647297626364	0.0466383224891163	0.574766769410442	-4.2316740905649
Q8N5M4	TTC9C	-0.410445378838678	3.34156002160654	-2.1571409865262	0.0880039916726866	0.600401339037267	-4.23388997528959
P51580	TPMT	-0.138456543046883	3.29710942082585	-2.39735488759553	0.0659950664493426	0.585213598468076	-4.23429380502281
P84101-1	SERF2	-0.205122952120233	3.27520228133244	-2.0727089758755	0.0975326896516815	0.600401339037267	-4.23463403193181
Q7LFL8-1	CXXC5	-0.172419984707181	3.28619140622755	-2.23832008129717	0.0797825692316988	0.59650499184859	-4.23494275364281
O43915	FIGF; VEGFD	-0.152935144231297	3.28446410253573	-2.47875601976219	0.0599675761246211	0.579893610416486	-4.23953662418318
Q96C23	GALM	-0.35905523984733	3.32188149103449	-2.11058729881435	0.0931276046962842	0.600401339037267	-4.24011536876583
O15213	WDR46	-0.171770239643096	3.27883033166087	-2.60230952905168	0.051949372636766	0.576473125197233	-4.24174278543829
Q9NXW9-1	ALKBH4	-0.320400723507401	3.33491012275062	-2.14175839025966	0.089662599495755	0.600401339037267	-4.24204890069104
P48507	GCLM	-0.172535073903186	3.31155293702554	-2.26750208592479	0.0770338513190384	0.592393159220944	-4.24207375978548
P47224	RABIF	-0.33703469831732	3.37658193008354	-1.96074391565296	0.111903117127966	0.611287479788836	-4.24338146764027
Q99575	POP1	-0.197792335847106	3.26550336880714	-2.82308410724159	0.0404304992229274	0.574766769410442	-4.24469842062478
Q6ZMT4	JHDM1D; KDM7A	-0.263043189749636	3.32069611763787	-1.92120692796466	0.117499643261223	0.613199272208859	-4.24522070454822
Q2VWP7	PRTG	-0.220654865138148	3.28850575859874	-2.10480283976396	0.0937862859017755	0.600401339037267	-4.246952942667
Q96KP4	CNDP2	-0.101420394516811	3.2995375603025	-2.81876994239425	0.0406260679616171	0.574766769410442	-4.24698855567565
Q8WXD5	GEMIN6	-0.149873888414369	3.29760825749399	-2.30654641527856	0.0735161782465945	0.589852885511626	-4.24771563985943
Q9UMX5	NENF	0.169546982756754	3.36962887270948	2.29841684067855	0.0742339102498724	0.589852885511626	-4.24792911388224
Q96QG7	MTMR9	0.124860191099424	3.31535164276014	2.44594741937426	0.062320682350758	0.584370312796309	-4.24892633053069
P23919	DTYMK	-0.318527382993116	3.32431647054288	-2.70416548478862	0.0462320162713855	0.574766769410442	-4.24920748877121
Q9NQC3	RTN4	0.116513539795268	3.33995952229667	2.9837034191967	0.0338535360692735	0.571330856959487	-4.25241758954014
Q9NZ08-2	ERAP1	0.149363791564277	3.30608424771216	2.49116339477371	0.0591034152645635	0.579893610416486	-4.25343442285939
Q8N2K0-2	ABHD12	0.158378346636459	3.31624051938408	2.55695143710081	0.054745757831752	0.579167513245112	-4.25371874038309
Q8N370-3	SLC43A2	0.245854200872495	3.32852005077859	1.91632043630324	0.118211519966367	0.613199272208859	-4.25655975801887
Q5TC12-1	ATPAF1	-0.216896344634414	3.29840001645971	-2.05227904440707	0.100000670195661	0.600401339037267	-4.25794591793474
P02771	AFP	0.234733569701847	3.33417602247719	2.14910319425267	0.0888664944795599	0.600401339037267	-4.25897044291995
Q9BXS9-1	SLC26A6	0.31941239877587	3.36540912092738	1.80854706139653	0.135114693303987	0.619107450141729	-4.2612602856729
O75223-1	GGCT	-0.112657129537042	3.28940894344239	-2.77168289535332	0.0428313160206484	0.574766769410442	-4.2625430721064
Q01415-1	GALK2	-0.166671869347087	3.33912452470187	-2.35035279470692	0.0697769000822311	0.587341417615064	-4.2626654446399
O95801	TTC4	-0.194972331948825	3.32568343160035	-2.51246603831296	0.0576516621728225	0.579893610416486	-4.26273865440454
Q96RD7-1	PANX1	0.168619838268988	3.35758375827642	2.23100968581279	0.0804877177582523	0.59650499184859	-4.26293520920329
Q8IZT6-1	ASPM	-0.122195320767928	3.29778183237264	-3.00380023266841	0.0331194614522525	0.571330856959487	-4.26461811274325
Q9NY72	SCN3B	0.266355498375977	3.30336760837603	2.03699606953451	0.101890421156022	0.603321417480837	-4.26484555575804
Q8N0Y2-1	ZNF444	-0.260028972050718	3.32387167763446	-2.05935792869217	0.0991380591296751	0.600401339037267	-4.26851115337669
Q969S9	GFM2	-0.167487844392097	3.28300645560463	-2.59059552241621	0.0526560135880364	0.576473125197233	-4.27068548897726
Q9HC36	RNMTL1; MRM3	-0.159206630911346	3.25726010634951	-2.33375224678752	0.0711688527031447	0.589852885511626	-4.27178536901503
Q9ULH0-1	KIDINS220	0.137404037775925	3.32299095018509	2.68375096754604	0.0473190828419544	0.574766769410442	-4.27296169808766
P58340-1	MLF1	-0.218145138969116	3.30109241484401	-2.01904399555906	0.104158900358128	0.606220019604652	-4.27594851741431
P48651	PTDSS1	0.145912624266338	3.33557087874158	2.32384260377487	0.0720142369655347	0.589852885511626	-4.27605287453593
Q96GP6-1	SCARF2	0.209431323668264	3.31821469208378	2.11042750987526	0.0931457331927257	0.600401339037267	-4.277989780294
Q8WXD9	CASKIN1	0.176037235226006	3.32205335109745	2.14836955611618	0.0889456704965042	0.600401339037267	-4.27903894650824
Q9P2K5-1	MYEF2	0.0824594023423364	3.35501237671215	2.96210996743693	0.0346629356618185	0.571330856959487	-4.27970230574323
O75386-2	TULP3	-0.299974375761039	3.3422207023281	-2.24058531638258	0.0795654314564759	0.59650499184859	-4.28006928976854
O15347	HMGB3	-0.102638352996029	3.3051866691694	-2.68979966620141	0.0469940370789678	0.574766769410442	-4.28086694387572
Q9Y5N6	ORC6	-0.193668642127931	3.32817790967202	-2.57024769060946	0.0539090588094697	0.577220756495511	-4.28132193348865
Q9BX68	HINT2	-0.384713019199701	3.33654012973579	-2.3232769967519	0.0720628186145657	0.589852885511626	-4.28177694989268
Q9ULD4	BRPF3	0.114158894680754	3.33350630522636	2.62842690783422	0.0504115831518955	0.576473125197233	-4.28234442467044
Q8TDP1	RNASEH2C	-0.380555394964204	3.34892322352023	-1.94738267340866	0.11376231870925	0.612611556046713	-4.28568013839816
P51512-1	MMP16	0.1583477401515	3.29660100673264	2.28541818553242	0.0753974485483204	0.589852885511626	-4.28646693485392
Q13049	TRIM32	-0.19211088797805	3.32953683836461	-2.27959464794481	0.0759251614868012	0.589852885511626	-4.28660326813306
Q8NEY8-3	PPHLN1	0.215261769680562	3.29446871543779	2.13401974389907	0.0905097042660826	0.600401339037267	-4.28927929544764
P42704	LRPPRC	-0.11283707086586	3.27098745633737	-3.47451130287962	0.0201918711759567	0.547700474399397	-4.29153066776949
Q9H0R4-1	HDHD2	-0.165102121557339	3.31555676342625	-2.22787347815894	0.0807923014166305	0.597590616334545	-4.29182992834718
Q86XR8-1	CEP57	-0.182747887481816	3.26582316786155	-2.31476084003869	0.0727986424535106	0.589852885511626	-4.29262923017581
Q13595-1	TRA2A	0.180764621722776	3.33737811038009	2.20831831188025	0.0827198828207973	0.597945326025167	-4.29299557400557
Q9P2E5-1	CHPF2	0.174239911211411	3.33258052647348	2.27989700254912	0.0758976641305174	0.589852885511626	-4.29499621231932
P52756	RBM5	0.139029074999008	3.32943530534009	2.64408232234506	0.0495141674711302	0.576473125197233	-4.29720837472899
Q9Y233-2	PDE10A	0.243537531596806	3.29127779889999	1.92236310543611	0.11733186838279	0.613199272208859	-4.29864960382454
Q10589	BST2	0.263222081571545	3.3300996739661	1.92642157094384	0.116744928622377	0.613199272208859	-4.30067900687989
P17568	NDUFB7	-0.320685870552319	3.15932679163458	-2.15955761272525	0.0877464404248379	0.600401339037267	-4.30214066293422
Q8NEY1	NAV1	0.122588562710266	3.31006127447202	2.71329242358187	0.0457550803167591	0.574766769410442	-4.30429437521336
Q96MF7	NSMCE2	0.152562267469078	3.35546813645131	2.41910667951019	0.06432159496081	0.585213598468076	-4.30468003701172
Q96JM3	CHAMP1	0.13701007121112	3.33243940173415	2.9507196150013	0.0350987153621005	0.571330856959487	-4.30608190728982
Q9BW27	NUP85	0.140213031046569	3.31001249209771	2.73319314539264	0.0447341553213481	0.574766769410442	-4.3063683288189
P49792	RANBP2	0.141507326867987	3.3346404631195	3.50925215926517	0.0194951122911448	0.547128419941793	-4.30750021746799
Q9UMN6	KMT2B; MLL4	0.124266055397337	3.33053895131751	2.73424949843003	0.0446806819008709	0.574766769410442	-4.31223045632652
O75094-1	SLIT3	0.210801633655433	3.3015289867481	2.00097292001289	0.106496716468489	0.609558441181281	-4.31292303376304
P04920-1	SLC4A2	0.22586134212736	3.33135946487202	2.05137843434293	0.100110988698082	0.600401339037267	-4.31434205156177
Q8N0V3-1	RBFA	-0.164364894187741	3.27234964772098	-2.18346425129904	0.0852419583821427	0.597945326025167	-4.31499792713078
P31321	PRKAR1B	-0.154998760156548	3.30098011745332	-2.20682567200302	0.0828690477770153	0.597945326025167	-4.31542691989516
Q86U06-2	RBM23	-0.194193950982185	3.29678788968169	-2.01904713058343	0.104158499549198	0.606220019604652	-4.3157936442648
P36404	ARL2	-0.242517574736471	3.37041102658508	-2.21437027801564	0.0821180603318633	0.597945326025167	-4.31647782825213
Q05707-1	COL14A1	0.14340082063914	3.31648713718745	2.49334385847147	0.0589529758009866	0.579893610416486	-4.31887075049931
Q9H6V9-2	C2orf43; LDAH	0.157395684509	3.32152569291937	2.30343734260757	0.0737897692500488	0.589852885511626	-4.32084266175027
O95861-1	BPNT1	-0.169149066595377	3.33462748285429	-2.50116134456678	0.0584170867653086	0.579893610416486	-4.32197586490355
Q8NFP9-1	NBEA	0.151326272033243	3.31464041983425	2.89582338889074	0.0372879418129634	0.574766769410442	-4.32353223955561
Q68CP9-1	ARID2	0.107742777944806	3.3437867324021	2.90261440297962	0.0370089169575695	0.573597063041259	-4.32390626470487
P61296	HAND2	-0.139924835560315	3.33305193386868	-2.24940742954946	0.0787258701914338	0.59650499184859	-4.32393220337021
Q13591	SEMA5A	0.205482366634312	3.32184448673242	2.11111786577753	0.0930674375599723	0.600401339037267	-4.32450498228904
O96011-1	LOC101060567; PEX11B	0.154354300439066	3.33052619550064	2.23310681201528	0.080284743204649	0.59650499184859	-4.32517978053092
Q9H0X4	ITFG3; FAM234A	0.243872895547642	3.3297001517914	2.01341545420847	0.104881152413569	0.607276496539471	-4.32532703473542
O75398	DEAF1	0.199458481201705	3.33335751338084	2.09341372470607	0.095097819644916	0.600401339037267	-4.32686369458086
Q9H840	GEMIN7	-0.712746430320805	3.38638278157332	-1.71016189263929	0.152733798929221	0.629888102837026	-4.32742134607953
Q92597	NDRG1	-0.171914992697983	3.38981899114355	-2.18172018353957	0.0854220337148539	0.597945326025167	-4.32772948875309
Q96MH6-1	TMEM68	0.199768010909532	3.34273557844758	2.13172034418301	0.0907630621429078	0.600401339037267	-4.32795955034711
Q9UIF8-1	BAZ2B	0.138022434195475	3.32302655528888	2.76240536487842	0.0432815164062988	0.574766769410442	-4.3281454615809
Q06730-3	ZNF33A	-0.259574997687658	3.30682526248237	-1.79848683975302	0.136815931380035	0.620847906360357	-4.32968190067801
Q96S52	PIGS	0.125099903845065	3.33798002516054	2.36566304134449	0.0685195384134431	0.585383537405773	-4.33089335835077
Q8WV16-1	DCAF4	-0.150697086971492	3.28090493148485	-2.19424690632447	0.0841377155833835	0.597945326025167	-4.33136239711487
Q96BS2-1	TESC	-0.345709834807628	3.37114941714886	-1.95097801664069	0.113258847597643	0.611287479788836	-4.33210896433334
P62253	UBE2G1	-0.450125000427586	3.33546319389816	-2.36933431138383	0.0682217395396516	0.585241326815686	-4.33491334592124
Q9H8G2-1	CAAP1	0.159996078727569	3.36005017675954	2.19437668853931	0.0841245192511328	0.597945326025167	-4.33547818424793
Q5GH72	XKR7	0.376226698051551	3.34096711260668	1.67189280100587	0.160207736040118	0.629888102837026	-4.3354940340619
Q53EL9-1	SEZ6	0.148564898362506	3.30645765758184	2.46585556529295	0.0608809150749816	0.581893756626096	-4.33554823761084
Q6ZNJ1-1	NBEAL2	0.187035562473551	3.33544192680158	2.17156565445057	0.0864786837184818	0.597945326025167	-4.33869137625654
Q14197	ICT1; MRPL58	-0.173189753674926	3.30064094936469	-2.24394325190309	0.0792447308695623	0.59650499184859	-4.33950596039234
O75879	PET112; GATB	-0.147345203356045	3.28821806693132	-2.40262306099862	0.0655854104322101	0.585213598468076	-4.34131702766566
O43463	SUV39H1	-0.247950640697781	3.30324216627868	-2.26331156350661	0.0774221549107662	0.593269784931943	-4.34206298247726
Q53GS7-1	GLE1	0.145359666465838	3.33224486493437	2.55308852661586	0.0549915382487236	0.579167513245112	-4.34374492804849
Q13438-1	OS9	0.178127183806574	3.32192290770528	2.31055343342696	0.0731652022614403	0.589852885511626	-4.34413061384616
O75976	CPD	0.131627529148662	3.33782036977115	2.93212755246939	0.0358234292641785	0.573597063041259	-4.34551125955121
O43504	LAMTOR5	0.253153813976672	3.42561423685132	2.04380707544012	0.101043575762443	0.603321417480837	-4.34587688602205
Q9H0C5	BTBD1	-0.20843394449817	3.32182873828157	-1.93901141806467	0.114943745511049	0.612936540749083	-4.34649102010083
O75694	NUP155	0.18185073331075	3.31792750572448	2.91983104092361	0.0363120542515493	0.573597063041259	-4.34695152271535
P82664	MRPS10	-0.132816525826802	3.29139660610808	-2.30663522226083	0.0735083797267119	0.589852885511626	-4.34837564086941
Q14151	SAFB2	0.193870864197933	3.32681516770085	2.73257566902839	0.0447654457096299	0.574766769410442	-4.34868979455185
Q6UXG2-1	KIAA1324	0.172038897036163	3.32721960122861	2.30045190171808	0.074053527064173	0.589852885511626	-4.35108363623091
Q8IYR6-1	TMEFF1; MSANTD3-TMEFF1	0.172554148778314	3.3341047638671	2.1793987363094	0.0856623613615463	0.597945326025167	-4.35180115303832
Q7Z6E9	RBBP6	0.150884270519408	3.31168319667518	2.78102162355306	0.042383455341199	0.574766769410442	-4.35275576807744
Q9NUW8	TDP1	0.142551283185854	3.31549813135696	2.626972518746	0.0504958702536408	0.576473125197233	-4.35339479437146
Q9H173	SIL1	0.19203407428718	3.32335192992834	2.06926855579839	0.0979437018971412	0.600401339037267	-4.3536258831142
Q9Y2G7	ZFP30	-0.640831936743758	3.17404312405745	-1.71504562185148	0.151805918812399	0.629888102837026	-4.35403516450245
Q7Z388	DPY19L4	0.23622454239424	3.33794124444976	1.85252947525968	0.127930784625625	0.61592197485254	-4.35468199820144
Q92854-1	SEMA4D	0.143878427271857	3.30202383354047	2.48125840029745	0.0597921694130165	0.579893610416486	-4.35482289406416
O15119-2	TBX3	-0.290517715250335	3.36801574713723	-2.6186041514457	0.050983911988404	0.576473125197233	-4.35834876152922
Q96JQ2	CLMN	0.14227619870056	3.32968155596059	2.37960284593219	0.0673963101854748	0.585241326815686	-4.35859126743915
Q6BDS2	UHRF1BP1	0.0926218580781125	3.32145945961509	2.66427480215948	0.0483829062071115	0.576473125197233	-4.35863113786272
Q6UWP7-1	LCLAT1	0.152688476976038	3.3339767279617	2.36990751547873	0.0681753717549162	0.585241326815686	-4.35925874766843
Q9UGK8	SERGEF	-0.175962384156227	3.24734193075989	-2.03275111758653	0.102422038137929	0.603321417480837	-4.36284761779707
Q8WWC4	C2orf47; MAIP1	-0.206248962329492	3.22178067790282	-2.29642402658123	0.0744110133824719	0.589852885511626	-4.3632832424124
Q8NEY8-2	PPHLN1	0.183390897530425	3.3644280058882	2.39156635518638	0.0664484315137441	0.585241326815686	-4.36379521747179
Q9H246	C1orf21	0.290751423114806	3.3466840583482	1.864107322639	0.126106595980063	0.61592197485254	-4.36481206027555
Q04656-3	ATP7A	0.0979876146059302	3.30785808365334	2.7812507541947	0.0423725332255506	0.574766769410442	-4.36581834432929
P55198	MLLT6	0.183042826614276	3.34660244235229	1.97643014469484	0.109761268401428	0.61045378725435	-4.36593314121425
Q14692	BMS1	-0.197218149366742	3.26827896840828	-2.63538178050346	0.050010687136679	0.576473125197233	-4.36639717416046
Q96QD8	SLC38A2	-0.28646048642663	3.28768813339128	-2.20036220227727	0.0835183344804378	0.597945326025167	-4.36656610563094
Q9C0G0	ZNF407	0.173783042321488	3.3336392410904	2.26776904873662	0.0770091858222079	0.592393159220944	-4.36740283177339
Q9NPJ3-1	ACOT13	-0.177247650642065	3.27709197859898	-2.06744167338046	0.0981627037647149	0.600401339037267	-4.36812927089758
Q6NXT4-2	SLC30A6	0.203366310026386	3.31999847157965	2.05846811257628	0.0992460516644264	0.600401339037267	-4.37062082855017
Q9UK28	TMEM59L	0.360225505744311	3.30501396844761	1.62541640307052	0.169785410235578	0.639221410600478	-4.37222704974975
P49441	INPP1	0.33308069986834	3.2852168438832	1.85252519006735	0.127931464863938	0.61592197485254	-4.37476632806462
P01023	A2M	0.216046789136951	3.36219492286864	2.08379686960093	0.0962205680688935	0.600401339037267	-4.37743728071976
Q9Y530	OARD1	-0.160463052249492	3.32084780965117	-2.29825656826486	0.0742481367821976	0.589852885511626	-4.37829048295793
P25912-1	MAX	0.165158546764653	3.30097677030906	2.28654367118679	0.0752959217272436	0.589852885511626	-4.38083764916093
Q9NXA8-1	SIRT5	-0.214523315788692	3.31604061727651	-2.35582467645488	0.0693246387405007	0.587341417615064	-4.38204913620104
Q9H2U2	PPA2	-0.16594530120677	3.31280744052957	-2.61113153904762	0.0514241613617657	0.576473125197233	-4.38209559570882
P38435-1	GGCX	0.191435017419775	3.33456243529861	2.06712198608685	0.0982010807983353	0.600401339037267	-4.38216910478224
Q10472	GALNT1	0.178641831687042	3.31434165022604	2.33857333441067	0.0707614995724004	0.589852885511626	-4.38221565404543
Q2KHT3	CLEC16A	0.154808267327555	3.36100881672457	2.32471267082734	0.0719395742326133	0.589852885511626	-4.38293494904003
Q9H972	C14orf93	-0.199127718901725	3.33784754104602	-1.95946240957357	0.112080038765896	0.611287479788836	-4.38440898488698
Q9H169-2	STMN4	-0.305183124270254	3.30965503798939	-1.662269494564	0.16214496538562	0.632323590694833	-4.38456201662362
Q92556-1	ELMO1	0.142915377645815	3.34996108912395	2.28715093097612	0.0752412044630436	0.589852885511626	-4.38478259059224
Q9BRA2	TXNDC17	-0.201765369810613	3.32814294613874	-2.36909990300298	0.0682407113321553	0.585241326815686	-4.38609547176089
Q9HCE9-2	ANO8	0.241339529407296	3.35442639514713	1.87338371631247	0.124664615126746	0.61592197485254	-4.38651939783885
Q01973	ROR1	0.177950320540998	3.33537244681732	2.05791611413873	0.0993131080617235	0.600401339037267	-4.38847743173097
Q4VC05	BCL7A	0.259610728681304	3.30627861733037	1.78557459455772	0.139031982435959	0.622442137443715	-4.38961430936592
Q9BQC3	DPH2	-0.264234606514137	3.34161206274175	-2.2869250856381	0.0752615492386647	0.589852885511626	-4.39002055315267
Q9H7F0-1	ATP13A3	0.16314868163206	3.33398525093767	2.30312156812038	0.0738176187601868	0.589852885511626	-4.39318940708764
P20700	LMNB1	0.116854185117327	3.36275691415486	3.40449789027094	0.0216852317102313	0.550968272456415	-4.39389537976662
Q7LGA3-1	HS2ST1	0.134518117349429	3.32437101542664	2.40856017595351	0.0651270852440968	0.585213598468076	-4.39466247076032
Q8N594-1	MPND	0.231618291455858	3.34889536000866	1.83176282053573	0.131271938686939	0.61592197485254	-4.39483475699005
Q96K83	ZNF521	0.187027014334844	3.33155756452924	1.99107934404583	0.107800157973646	0.61045378725435	-4.39563375339751
P08183	ABCB1	0.1908702416095	3.32217092683578	2.67276974276117	0.0479156427155439	0.576473125197233	-4.40013816670373
Q9H9A7	RMI1	0.129517265139787	3.32481769760079	2.37149368732808	0.0680472427964054	0.585241326815686	-4.40024249806609
Q9BS16	CENPK	0.158537640159607	3.33369828672704	2.23411169437618	0.0801876805422399	0.59650499184859	-4.40093498914474
Q96CB9	NSUN4	-0.163399580948189	3.28700949716042	-2.14857697881622	0.0889232772325721	0.600401339037267	-4.40152056250653
Q9UJ14-1	GGT7	0.187201111780734	3.38565502290419	2.12945915255671	0.0910129538810601	0.600401339037267	-4.40243207290745
P07954-2	FH	-0.0849594316087653	3.28423049588668	-2.83566294123867	0.0398663088161242	0.574766769410442	-4.40339075061189
Q9C0H5-2	ARHGAP39	0.123701851714753	3.3300055748961	2.43197892215786	0.0633533034423495	0.585213598468076	-4.40984671170487
O95461-1	LARGE; LARGE1	0.245012227217956	3.35720632215636	1.82274448030377	0.132751037094558	0.616905436065609	-4.41189501152309
Q96MT8-3	CEP63	0.137684870593086	3.32532338253017	2.19082230633791	0.0844867410126616	0.597945326025167	-4.41217575452153
O60292	SIPA1L3	0.140630819537498	3.32971475319614	2.43536843867662	0.0631010117608332	0.585213598468076	-4.41284270416949
O95602	POLR1A	0.10798693265793	3.33028263975312	2.97993730456172	0.0339931463319494	0.571330856959487	-4.4129108267176
P38571	LIPA	0.17061508020994	3.31989485250262	2.19351262068651	0.0842124203556027	0.597945326025167	-4.41474588235721
Q9NRY4	ARHGAP35	0.105697205443551	3.33149997297866	2.73932175893691	0.0444249170918483	0.574766769410442	-4.41480942254005
Q7Z3B1	NEGR1	0.194535936721	3.35227816713246	1.95847015437193	0.112217229999871	0.611287479788836	-4.41484371857173
Q56NI9	ESCO2	-0.186683672949913	3.26939957838448	-2.44899758132991	0.0620976763500059	0.584370312796309	-4.41675793441367
Q9P281	BAHCC1	0.219428187832061	3.29905218121427	2.01232408622888	0.105021811192257	0.607276496539471	-4.41748259869189
Q6YHU6	THADA	0.101241943164137	3.31550569026307	2.70471306324691	0.0462032455438525	0.574766769410442	-4.41822748050445
Q14642	INPP5A	0.186708169325421	3.33275457384733	2.05418091270122	0.099768130353214	0.600401339037267	-4.41833447019446
Q15554-3	TERF2	0.138987640605694	3.32196936487287	2.51047499971518	0.0577856627939254	0.579893610416486	-4.41835291272558
Q96HE7	ERO1L; ERO1A	0.126772938112201	3.34980223327911	2.59243926263355	0.0525440847592148	0.576473125197233	-4.41870627828498
Q6TCH7-1	PAQR3	0.227850704142007	3.29558515267695	1.75108130808362	0.145135245757743	0.627138273705989	-4.41890414654369
P42696	RBM34	-0.299523290974028	3.25918283173985	-2.24408187451341	0.0792315218847939	0.59650499184859	-4.41994482869632
Q9UQ84-1	EXO1	-0.107461452496775	3.28747042324337	-2.53110230519286	0.0564139677230786	0.579167513245112	-4.4200829827815
P35556	FBN2	0.170299195228357	3.30777721462409	2.23385747638448	0.0802122236917832	0.59650499184859	-4.42068494215962
O75618-2	DEDD	-0.257429476374154	3.32450356143485	-1.70109496992249	0.154471840700977	0.629888102837026	-4.42294304153253
Q15527	SURF2	-0.186224405668875	3.25540098475254	-2.14517370608101	0.0892914616895386	0.600401339037267	-4.42316605064527
O60232	SSSCA1	0.145544356349521	3.29907606436157	2.18855884869422	0.0847182851491317	0.597945326025167	-4.42353011778062
Q9BZK7	TBL1XR1	-0.154872410708904	3.32789646345434	-2.63280832765842	0.0501586112129931	0.576473125197233	-4.42394268526455
O15484	CAPN5	0.153144185740851	3.33297082338744	2.21391558210074	0.0821631112432988	0.597945326025167	-4.42494532738835
Q8TDG4	HELQ	0.305801683055878	3.28368434226005	1.69698175956435	0.155266940370264	0.629888102837026	-4.42513844442449
P61266	STX1B	0.160807113166785	3.32876269405929	2.41237469665776	0.064834476621314	0.585213598468076	-4.42572382232025
P62070-4	RRAS2	0.174442562233181	3.33089423230025	2.03373209468939	0.102298923531901	0.603321417480837	-4.42576884845729
Q9NQ55-3	PPAN-P2RY11; PPAN	-0.156177727914981	3.28986255131123	-2.27822716434169	0.0760496616005342	0.590269999163923	-4.42669057464737
Q68D10-1	SPTY2D1	-0.25378532629854	3.23272138620138	-1.81776248486813	0.133575542529513	0.617352374730627	-4.42736285283789
O43166-2	SIPA1L1	0.162345804978903	3.31865903558609	2.39650803799374	0.0660611799614275	0.585213598468076	-4.42847774291284
P23378	GLDC	-0.170163370059478	3.29611790293996	-2.48322674398982	0.0596545950385569	0.579893610416486	-4.43017254257429
P05452	CLEC3B	0.319365398717554	3.390545383259	1.61714716486427	0.171549079715449	0.639221410600478	-4.43221741066157
Q63HN8-4	RNF213	0.0752203945999758	3.31939668395447	3.00259420854351	0.0331630004399281	0.571330856959487	-4.43377044514792
Q96AY3	FKBP10	0.140946419691232	3.31476030114442	2.66074074721846	0.0485787952148005	0.576473125197233	-4.43456196650905
Q86YD5	LDLRAD3	0.214984190731446	3.34025051089741	1.85436079515985	0.127640422692991	0.61592197485254	-4.43592009429317
O94776	MTA2	-0.139890335952979	3.28321742195329	-2.84281020358757	0.0395496951790194	0.574766769410442	-4.43613170299449
Q7Z4G1-2	COMMD6	-0.467800628536794	3.35474823525964	-1.92946984718863	0.116306114683882	0.613199272208859	-4.43626410080532
Q96EU7	C1GALT1C1	0.164966085176398	3.32989678351147	2.12802413034973	0.0911719264813487	0.600401339037267	-4.4365885362201
Q92665	MRPS31	-0.273078217735579	3.30694077678622	-2.48021239827464	0.0598654208232286	0.579893610416486	-4.43815571534402
Q8TCT7	SPPL2B	0.195126776246766	3.35114493910889	1.84602845937664	0.12896711217539	0.61592197485254	-4.43854676828864
Q13405	MRPL49	-0.182731065997409	3.26530245411248	-2.03376299418757	0.102295048142924	0.603321417480837	-4.43948811332136
Q8IUW5	RELL1	0.214097776214923	3.36944647156416	1.84584308064797	0.128996791301778	0.61592197485254	-4.44135015523878
O60716-1	CTNND1	0.0976324855535717	3.32510970189177	2.80705669601512	0.0411624471571537	0.574766769410442	-4.44236421978339
Q8WVM0	TFB1M	-0.147948533838295	3.26156373806673	-2.06400911263625	0.0985756063495248	0.600401339037267	-4.44346173980017
Q86VQ6	TXNRD3	-0.283781100203008	3.32063465529661	-2.0296127464453	0.102816970596068	0.603321417480837	-4.44437539480547
P62269	RPS18	-0.346684510294819	3.29084761261023	-2.71366125774281	0.0457359228131383	0.574766769410442	-4.44500333016992
P62879	GNB2	-0.14956717487618	3.2884730252875	-2.06447913195762	0.0985189582884574	0.600401339037267	-4.44643534759256
O75648-1	TRMU	-0.159784199715332	3.32277295731781	-2.21176036067401	0.0823770133862921	0.597945326025167	-4.447060702434
O14771	ZNF213	0.231736061441004	3.32270560431337	1.70542133797699	0.153640014832123	0.629888102837026	-4.44710425622262
Q9BQ69	MACROD1	-0.152960039913153	3.30127811401341	-2.03424672584716	0.102234399299452	0.603321417480837	-4.44732311983921
Q8NE62	CHDH	-0.165097857470628	3.25847590573944	-2.05634479564843	0.0995042556579425	0.600401339037267	-4.44797913933888
O94898	LRIG2	-0.18914830236892	3.31687462252026	-1.89098100389029	0.121976337941663	0.61592197485254	-4.44813619934906
Q92871	PMM1	-0.204530273651139	3.33223213478351	-1.99307536510216	0.107535834215579	0.61045378725435	-4.44936819578514
Q00403	GTF2B	-0.16343927426231	3.3118934764502	-2.25245768376104	0.0784378341910273	0.59650499184859	-4.45392549312826
O43665-3	RGS10	-0.202122263173997	3.31225204963615	-1.84031308450034	0.129885420479499	0.61592197485254	-4.45433606997603
O60287	URB1	0.138824736219807	3.32373516996704	2.79829667494558	0.0415688046338053	0.574766769410442	-4.4563199039401
Q9Y672	ALG6	0.191968954776512	3.34104927364949	1.92718320941919	0.116635124158311	0.613199272208859	-4.45639745797896
O43602-2	DCX	-0.121636509983872	3.32024178503432	-2.32912254664223	0.0715624504642053	0.589852885511626	-4.45780447472842
Q99584	S100A13	-0.191429458662971	3.25041674697917	-2.09671535036862	0.0947156036782599	0.600401339037267	-4.45823080366219
P30084	ECHS1	-0.116398378990848	3.28279848053448	-2.74586511904685	0.0440973969770112	0.574766769410442	-4.45934764427132
Q9H967	WDR76	-0.145313210993155	3.32295751845115	-2.4364270380855	0.0630224441515364	0.585213598468076	-4.46023519741888
Q7LDG7-2	RASGRP2	0.255544246634488	3.29196084541107	1.94105981879089	0.1146534669992	0.612936540749083	-4.46060226604207
Q15853	USF2	0.163972478641393	3.33737268680605	2.12750112677159	0.0912299393137939	0.600401339037267	-4.46239538293932
Q14520-1	HABP2	0.282096738902296	3.34873515423154	1.71189266147331	0.152404302156782	0.629888102837026	-4.46259024389234
Q8N999-1	C12orf29	-0.142442813221522	3.30423398180079	-2.22882250853398	0.0807000013321985	0.597438020519722	-4.46262890879859
Q96RL7	VPS13A	0.141973685649264	3.30985924989561	2.87725258232172	0.0380631910095675	0.574766769410442	-4.46289950837297
O00562	PITPNM1	0.129476836392296	3.32835368373642	2.31469887395068	0.0728040265183209	0.589852885511626	-4.46351969125025
Q504T8	MIDN	0.298847641647512	3.29004345763835	1.76095125347619	0.143361191812833	0.626303905597185	-4.46461042451063
Q9HCD6-2	TANC2	0.268411177887469	3.27105694404782	1.67201486344506	0.160183315463573	0.629888102837026	-4.46493487758168
Q99757	TXN2	-0.234223080345309	3.31493941705119	-2.11075394079892	0.0931087027357943	0.600401339037267	-4.46672655879473
Q86WG5	SBF2	0.111690095501336	3.3187480652612	2.55408037609768	0.0549283143907929	0.579167513245112	-4.46728313189107
Q5VW36	FOCAD	0.147932027985426	3.29778253288078	2.4737664909484	0.0603190219441536	0.579953133709878	-4.47096649983382
Q96I76	GPATCH3	-0.216572766594665	3.30716917986324	-1.74492739018337	0.14625277152387	0.628014729614136	-4.47199601310287
P54756	EPHA5	-0.596854716782125	3.50105903684448	-1.43335033174401	0.215809715361001	0.653616529153469	-4.47209033273295
P24386-1	CHM	0.141576389490608	3.29694354338295	2.2414038617624	0.0794871263533201	0.59650499184859	-4.4723369189066
O75882-1	ATRN	0.139190958534219	3.33762935150491	2.30595109279927	0.0735684793786555	0.589852885511626	-4.47306907970903
P42702-1	LIFR	0.135644518969219	3.32168250712565	2.16651886180888	0.087009078751023	0.597945326025167	-4.47346971945956
P46379-3	BAG6	0.121313614590386	3.31444985487421	2.60154404377006	0.0519952262062099	0.576473125197233	-4.47378937197018
Q6ICC9	LDOC1L; RTL6	-0.272226014603454	3.27589931236289	-1.61695399946747	0.171590497642794	0.639221410600478	-4.47516702875011
Q96PU4-1	UHRF2	0.11841692857974	3.32321818804517	2.33245007607023	0.0712793179317974	0.589852885511626	-4.47527554905192
Q9NSV4-3	DIAPH3	0.12938724360694	3.31771530953806	2.6114412624289	0.0514058300434919	0.576473125197233	-4.47683637178478
Q8NEZ2	VPS37A	-0.138032839103518	3.35364842996007	-2.1907977848498	0.0844892458101078	0.597945326025167	-4.47733468335276
Q86V88	MDP1	-0.272723454994679	3.35801610028893	-1.89348877795655	0.121598201438889	0.61592197485254	-4.47778104887162
O75792	RNASEH2A	-0.371058845755715	3.30557873559689	-2.38274354637921	0.0671460408011537	0.585241326815686	-4.47819856866754
Q9HBR0	SLC38A10	0.180238942725109	3.36204233439799	2.10763443639472	0.0934632273764151	0.600401339037267	-4.47902935784373
O95490-5	LPHN2; ADGRL2	0.150721326562575	3.340211236807	2.25185347243822	0.078494798875003	0.59650499184859	-4.47927519561218
Q8WUH1	CHURC1	-0.347929256445072	3.35916064169079	-1.72990189791948	0.149018579716714	0.629888102837026	-4.47972866908681
Q5EBM0-1	CMPK2	-0.242632796802669	3.3168686859368	-1.98998455321189	0.107945428331229	0.61045378725435	-4.4798340806069
Q8N2A8	PLD6	-0.256201253899715	3.23315931495034	-1.85664654837149	0.127278972278265	0.61592197485254	-4.48120028786697
P28347	TEAD1	0.172525775522193	3.34086032908494	1.88409372751657	0.123021188073105	0.61592197485254	-4.48201304796186
P51788-1	CLCN2	0.270403641131374	3.30119317807765	1.59595045902147	0.176154423742767	0.639221410600478	-4.4824719082993
Q8N6N3	C1orf52	0.198279691378516	3.27852157529859	1.87603919388566	0.124255009729744	0.61592197485254	-4.4828728753658
P0CG35	TMSB15A; LOC101060235; TMSB15B	-0.18145015799696	3.37505571944026	-1.83723805083448	0.13038230877256	0.61592197485254	-4.4830089498592
Q10469	MGAT2	0.11226365722718	3.32969856955841	2.32021572234988	0.0723263828628798	0.589852885511626	-4.48434891416494
Q96L58	B3GALT6	0.183969524851835	3.32889800088737	1.92733127886267	0.11661378978762	0.613199272208859	-4.48493702615822
Q9Y2Z4	YARS2	-0.233013651103194	3.32902548209897	-2.11831116106153	0.0922558108828988	0.600401339037267	-4.4870069710719
Q9UNA1-1	ARHGAP26	0.149054433516692	3.33900292055034	2.02776751571293	0.103049930633536	0.603321417480837	-4.49170086395014
P26232	CTNNA2	0.147046711700881	3.33380106854732	2.45567291080682	0.0616126893205943	0.581893756626096	-4.49171455808782
Q5TH69	KIAA1244; ARFGEF3	0.238084826178525	3.30695813932593	1.64017216328436	0.16668352183632	0.63783843644242	-4.49171946195879
Q9UI30	TRMT112	-0.779759242357581	3.39602594567384	-1.77314605649124	0.14120003333277	0.623434045477739	-4.4922186291883
Q9UJA5-1	TRMT6	-0.22656566769941	3.3246415439076	-2.38975342854646	0.0665911250775244	0.585241326815686	-4.4931446786794
P36405	ARL3	-0.301892939835964	3.34732483182696	-2.28300242226891	0.0756158717316882	0.589852885511626	-4.49455505423105
P55809	OXCT1	-0.144202781092832	3.28714325551486	-2.52440915727504	0.0568550590186136	0.579167513245112	-4.49457353549499
P48728	AMT	-0.155536762546546	3.29978154683809	-2.03114573835913	0.102623856862575	0.603321417480837	-4.49475456163274
Q16560-2	SNRNP35	-0.156703196524734	3.30796579005649	-1.97441514555451	0.110033959743876	0.610681150748966	-4.4954999179053
Q9Y4F5	CEP170B; KIAA0284	0.247229967160383	3.27595580044804	1.62234848483123	0.17043760000408	0.639221410600478	-4.49598819609846
P09972	ALDOC	-0.0852737998281591	3.3493405367944	-2.52932981679146	0.0565304075556042	0.579167513245112	-4.49785450888079
P49760-1	CLK2	0.198465437537561	3.29843644606859	1.84474322622093	0.129173024250345	0.61592197485254	-4.49857400927149
O43182	ARHGAP6	0.121760970697054	3.30155899726577	2.41767744166297	0.0644301080935222	0.585213598468076	-4.50006962239405
Q5JU69-1	TOR2A	0.346813289411241	3.36179126879142	1.44437727152976	0.212863901373931	0.652125498659717	-4.50087114678771
P27037	ACVR2A	-0.220119717575564	3.29826691698836	-1.71261251321899	0.152267473495662	0.629888102837026	-4.50089089471398
O15360	FANCA	0.106820744706533	3.33485877765261	2.38580851593965	0.066902789573781	0.585241326815686	-4.50135827315977
Q5U3C3	TMEM164	0.279750729127633	3.28855195163093	1.5633436443743	0.183481481386416	0.642485434296894	-4.50151834232394
Q13443	ADAM9	0.15296570140146	3.31032295880051	2.29734329791796	0.0743292597315036	0.589852885511626	-4.50181570801479
Q5T5U3	ARHGAP21	0.121472042917332	3.3326862797702	2.52705724598105	0.0566800893258671	0.579167513245112	-4.50199001321953
P41223	BUD31	-0.227873645662248	3.33059112415466	-2.10856681522902	0.0933571131249595	0.600401339037267	-4.50201393089414
O14933	UBE2L6	-0.604757229463253	3.38504176536853	-1.52899077091895	0.191529120757759	0.645057578060008	-4.50399731175668
Q9BPX5	ARPC5L	-0.20000351168077	3.32626467863131	-2.13121343474179	0.0908190181581544	0.600401339037267	-4.50480608147159
Q7Z6J6-1	FRMD5	0.190392632383888	3.30075708760339	1.97189745795015	0.110375687680972	0.611274675393022	-4.50494616430528
P54278	PMS2; LOC107984056	-0.133619859912239	3.36458874065729	-2.3475005858809	0.0700139211383932	0.587341417615064	-4.50535402616067
P31641	SLC6A6	0.259018755487906	3.36627976522024	1.62288520226149	0.170323320905207	0.639221410600478	-4.50536372017735
P78560	CRADD	-0.580457752449602	3.34424553683974	-1.61630916257559	0.171728834364834	0.639221410600478	-4.50606405290898
Q92503-2	SEC14L1	-0.120139187744163	3.30073510461553	-2.291163869171	0.0748807056710257	0.589852885511626	-4.50634128485185
O94988-4	FAM13A	0.272993252792546	3.31964620607084	1.62057447544966	0.170815875227132	0.639221410600478	-4.50653884544708
Q7Z2K8-1	GPRIN1	0.127208404774693	3.35353132436063	2.83843298477888	0.0397432617616793	0.574766769410442	-4.50658440578609
Q9NQB0	TCF7L2	0.242547774783276	3.33875384928001	1.61088658378315	0.17289658087001	0.639221410600478	-4.50681414942969
P82663	MRPS25	-0.186117588204374	3.29424639113538	-2.06244805183198	0.0987639995932382	0.600401339037267	-4.50863207656061
Q4G148-1	GXYLT1	0.15105513327485	3.33046839402892	2.18781298214178	0.0847947349814692	0.597945326025167	-4.509167220579
Q5HY92	FIGN	-0.137763086939957	3.32299007702666	-2.21324660824018	0.082229441324407	0.597945326025167	-4.5097881289523
Q8WWV3-1	RTN4IP1	-0.186430336943507	3.26449386038284	-2.18914847606341	0.0846579022472418	0.597945326025167	-4.51008921004222
Q8IYA6	CKAP2L	-0.235674410588152	3.23593237402498	-2.23963252314991	0.0796566847150591	0.59650499184859	-4.51064803899852
Q02241-1	KIF23	-0.197611598948739	3.26252114962001	-2.69291585401124	0.0468275549543517	0.574766769410442	-4.51226226119597
Q96SI1-1	KCTD15	-0.425926982297176	3.36369705748564	-2.15830772467002	0.0878795452988328	0.600401339037267	-4.51359014613871
P29597	TYK2	0.188200694251065	3.33919684933763	1.83808656803135	0.130245001450388	0.61592197485254	-4.5136968082181
P51178-2	PLCD1	0.281079063589341	3.33686229369513	1.5622243106588	0.183738330460532	0.642485434296894	-4.51450129460097
Q8TEB9	RHBDD1	0.27137482614927	3.34943406543583	1.51812824646805	0.194145810182749	0.645214375174956	-4.51466032157006
O15118	NPC1	0.151557713473143	3.33278060273186	2.12501552694511	0.0915061909282122	0.600401339037267	-4.51540981443008
Q8IXB1-1	DNAJC10	0.123693715946635	3.3195962472651	2.30957562887088	0.0732506793978515	0.589852885511626	-4.516589779569
Q92844	TANK	0.171447335912452	3.325666964725	2.04514077788642	0.100878629912893	0.603245522922434	-4.51866132860875
Q8N158	GPC2	0.204388945569227	3.31787078556002	2.10002664718963	0.094333921012605	0.600401339037267	-4.52206109669238
Q9NQX5	NPDC1	0.276698052609712	3.37551711767643	1.49347057886538	0.200217088007843	0.645867981426319	-4.52208528111441
Q9UIW2	PLXNA1	0.138782913678295	3.3109540352564	2.58936882715652	0.0527306301942235	0.576473125197233	-4.52426485166348
Q9UL63-1	MKLN1	-0.195944550435206	3.32684946585617	-2.42688736650936	0.0637343740835582	0.585213598468076	-4.52428825411131
P56524	HDAC4	0.130802789925871	3.30890686793983	2.16660264340059	0.0870002450920224	0.597945326025167	-4.52540945834758
Q9H9Y6-3	POLR1B	0.129382301481254	3.32846061213401	2.57034318171896	0.0539031014350846	0.577220756495511	-4.5254563041078
Q9UBQ7	GRHPR	-0.383960607574423	3.32741545737648	-2.40714371461653	0.0652361104216284	0.585213598468076	-4.52629767898019
Q8NCG7	DAGLB	0.168451341359644	3.30450192101433	2.18869680029381	0.0847041535511102	0.597945326025167	-4.52632362870223
Q5ZPR3	CD276	0.204984851715635	3.35570526345077	1.85646466006749	0.127307695499898	0.61592197485254	-4.52655658523736
O15534-1	PER1	-0.153220125082683	3.31841918401058	-1.98098258866872	0.109147811947386	0.61045378725435	-4.52698157191102
Q9C0D5	TANC1	0.124384678234919	3.3114613270977	2.44700652955432	0.0622431478448529	0.584370312796309	-4.52711425285538
Q5M7Z0	RNFT1	0.204270286219192	3.3611114476815	1.78461811399571	0.139197605580182	0.622442137443715	-4.52802234249973
Q9Y5Y5-2	PEX16	0.168592448111507	3.32131299206128	1.90511345942327	0.119861342562884	0.61592197485254	-4.5283269622124
Q9NPF0	CD320	0.18539631947546	3.33854667562259	1.98521234058424	0.108581091126074	0.61045378725435	-4.52931891746376
Q9UKP4	ADAMTS7	0.287255143331949	3.33365637446767	1.47762314670392	0.204217095015973	0.64872967422434	-4.52946440797239
O00124-1	UBXN8	-0.293064563695305	3.33139787407119	-1.45084355974776	0.211154644912128	0.6500755924844	-4.53078662143414
Q9UBS3	DNAJB9	0.22642886419817	3.32289272243158	1.70607625684594	0.153514493049042	0.629888102837026	-4.53125027503446
Q9HCE6	ARHGEF10L	0.213898398291783	3.30371291699189	1.84234916572376	0.129557498706011	0.61592197485254	-4.53159975786706
Q96RG2-1	PASK	0.120955225170019	3.32506182242745	2.41273137258924	0.0648071903501947	0.585213598468076	-4.53213050582196
Q969G6	RFK	-0.425657061372741	3.35512005468334	-1.94653489819977	0.113881379777316	0.612856799111495	-4.53228928000927
Q14353-1	GAMT	-0.593075012349913	3.37388645678834	-1.83090535764455	0.131411831897821	0.61592197485254	-4.53306955942542
Q9NRR6-1	INPP5E	0.174502120564372	3.30360335154774	1.83402043029737	0.130904354208955	0.61592197485254	-4.5332929805247
Q96NT0	CCDC115	-0.417598724309496	3.3620558619615	-1.56864295153992	0.182270313714789	0.642485434296894	-4.53372963240702
Q6N063-1	OGFOD2	-0.206225502086469	3.31538361765198	-1.7991079560163	0.136710257933152	0.620706269134396	-4.5337880638667
Q5SRI9	MANEA	0.163475046430658	3.32244430944612	1.98335047096893	0.108830167812749	0.61045378725435	-4.53471833131019
P42658	DPP6	0.149492511460072	3.33726290129954	2.5074941827798	0.0579869226458968	0.579893610416486	-4.53854785954071
O95857	TSPAN13	0.227816150583831	3.30648669593185	1.60106956133247	0.175030979948098	0.639221410600478	-4.5406716533436
P07305	H1F0	-0.217559904338953	3.28413813750292	-2.15178450797201	0.0885777656399979	0.600401339037267	-4.54102474488714
Q9H9J4-2	USP42	0.0989066462957961	3.31810039261782	2.49186708613569	0.0590548182401837	0.579893610416486	-4.54111804577852
Q9P2N5	RBM27	0.109870890828643	3.3371480409075	2.58380291114041	0.0530706716102496	0.576599543829097	-4.54132358912507
Q9BYW2	SETD2	0.131556138220971	3.33155048696407	2.77626571060143	0.0426108748726375	0.574766769410442	-4.54178291861386
Q96H22-3	CENPN	0.137391926183694	3.33236677624051	2.06639133687437	0.0982888521727606	0.600401339037267	-4.54192809917027
Q9UI09	NDUFA12	-0.130546998491295	3.25775531040037	-2.18533623137243	0.0850491323221384	0.597945326025167	-4.54216581087146
P09497-2	CLTB	0.132664494997458	3.34666529611141	2.23173603440227	0.0804173537031304	0.59650499184859	-4.54236526007652
Q96CG3	TIFA	-0.169106902501334	3.32120923836081	-1.81479732509562	0.134068787486893	0.617798459088304	-4.54258254122419
O76064	RNF8	-0.184204494480207	3.301858553395	-1.90150132653679	0.120398233512263	0.61592197485254	-4.54272447314526
Q8N3G9	TMEM130	0.210654432578608	3.3065830199571	1.7092163173239	0.152914120845778	0.629888102837026	-4.5427385558229
O60449-2	LY75-CD302; LY75; CD302	0.308521195080494	3.35707700895922	1.42088352818012	0.219187737690582	0.653865270937632	-4.54285111553318
P48058-1	GRIA4	0.206187046284633	3.33993978611351	1.64890341271663	0.164875065175313	0.636590339648637	-4.54290151892783
Q02218	OGDH	-0.17976625238707	3.29294381199361	-2.69040850623535	0.0469614578293045	0.574766769410442	-4.54318558582817
Q9ULE0	WWC3	0.252273918521309	3.28035940234443	1.50238571432603	0.198000725990863	0.645214375174956	-4.54408448961272
P53794	SLC5A3	0.162173705896271	3.35996084171205	1.87435961147595	0.12451392028703	0.61592197485254	-4.54445795484012
Q14CZ0	C16orf72	-0.168736039233716	3.27799307499927	-1.84486129897851	0.129154093097554	0.61592197485254	-4.54515394365188
Q9UHC6-1	CNTNAP2	0.229153524180134	3.31817791556388	2.00629881929408	0.105801980324624	0.608070400210579	-4.54548075759348
O75051-1	PLXNA2	0.134548508233651	3.33686170403167	2.25922717931357	0.0778026733519798	0.594197532187865	-4.54609328877326
Q9GZU1	MCOLN1	0.296735831423198	3.33391421448564	1.41831355234934	0.219890427177342	0.654527098868447	-4.54631517428479
Q86TV6-2	TTC7B	0.180314459184047	3.30702806640966	2.06269564429974	0.0987340937943451	0.600401339037267	-4.54668954535931
P68036-3	UBE2L3	-0.178434041208047	3.26296338869181	-2.24298409420797	0.0793361920402379	0.59650499184859	-4.54797040268953
P42694	HELZ	0.116557552636275	3.31978042360459	2.54131428373216	0.0557482738083502	0.579167513245112	-4.54871762107838
P00403	COX2	-0.216226050594857	3.24131109088193	-2.0290270422487	0.102890854874338	0.603321417480837	-4.55068691594725
Q9HBH9-1	MKNK2	0.153271029345048	3.33511659863969	1.95043093439012	0.113335305998429	0.611287479788836	-4.55118364187901
Q9H765	ASB8	-0.442596019636233	3.26913904636809	-1.27482584051783	0.262720906550724	0.67809981846355	-4.55188959603003
O60242	BAI3; ADGRB3	0.207849995536394	3.3362178965157	1.70414554665051	0.153884833763294	0.629888102837026	-4.55263094300101
Q6ICB0	DESI1	-0.771286676354409	3.41947519049738	-1.50937819516132	0.196279242356535	0.645214375174956	-4.55356090861846
P05161	ISG15	-0.553584127289903	3.37303552378443	-1.58990804590033	0.177489792365746	0.639369532308295	-4.55400931498903
Q8NEF3-2	CCDC112	-0.27797695645466	3.28964336728666	-1.44370596227241	0.213042119013566	0.652221376444423	-4.5551945219283
Q9Y3B9	RRP15	-0.151639417660838	3.32017678946006	-2.29334667648288	0.0746854061728583	0.589852885511626	-4.555361601399
Q9BQA9-1	C17orf62	0.214189160798977	3.34013552479265	1.73373842799918	0.148307315487542	0.629888102837026	-4.55613629412556
O95571	ETHE1	-0.28314435911218	3.28879803605493	-1.81694125755381	0.133711962389402	0.617352374730627	-4.55632003365914
Q9BU64-1	CENPO	0.14876457551082	3.35908109568663	1.94257851568572	0.114438751374962	0.612936540749083	-4.55677411951187
O75912	DGKI	0.146167382064784	3.31149874752856	2.03843912677879	0.101710369628096	0.603321417480837	-4.5584383016698
P28799	GRN	0.145414537779402	3.33680119821441	1.9677461490707	0.110941601294372	0.611287479788836	-4.56030173213517
P00734	F2	0.158890391664697	3.34910292324481	2.1043528314986	0.093837737804452	0.600401339037267	-4.56094186158518
Q9H7P6	FAM125B; MVB12B	-0.18589519285002	3.30432732220382	-1.95491841797099	0.112709755113832	0.611287479788836	-4.56094860997624
P62701	RPS4X	-0.338847265467067	3.28914426164898	-2.90235381591619	0.0370195801243039	0.573597063041259	-4.56129595187531
O76031	CLPX	-0.170116494476259	3.24423148077739	-2.54942078827434	0.0552260353091358	0.579167513245112	-4.56145252281694
Q92685-1	ALG3	0.255015300970705	3.35337378806936	1.50518437807062	0.197309945427978	0.645214375174956	-4.56157340043165
Q7Z5Y7	KCTD20	-0.186835719282795	3.31924931232923	-1.92427542568908	0.117054920890171	0.613199272208859	-4.56509802157818
P16403	HIST1H1C	-0.2444994083465	3.26615455110518	-2.16833398043723	0.0868179149438192	0.597945326025167	-4.56534323366876
Q9Y4U1	MMACHC	-0.231685737032849	3.32763569447753	-1.67390490959171	0.159805662677652	0.629888102837026	-4.56664796102734
Q9H426-2	RIMS4	-0.157330005459514	3.29070505469116	-1.8682743044839	0.1254567114621	0.61592197485254	-4.56764686315654
Q9NXU5	ARL15	0.216190409135274	3.33829255820193	1.63995555138953	0.166728641195781	0.63783843644242	-4.56852492434685
Q96F85-1	CNRIP1	-0.591669307072897	3.37010223942654	-2.02974994907902	0.102799671187354	0.603321417480837	-4.57106953271579
A2RU54	HMX2	-0.402591279135289	3.3434077144025	-1.25520925181409	0.269151930761604	0.680884251093638	-4.57124533512433
Q14667-1	KIAA0100	0.11595893545222	3.33103585368416	2.35091233400689	0.0697305050711587	0.587341417615064	-4.57136111792796
Q9BZL4	PPP1R12C	0.171848186251676	3.3430680744288	1.89745032227606	0.121003357402669	0.61592197485254	-4.57179542582656
Q8TEM1-1	NUP210	0.227239078272544	3.31867297446355	2.49211060927198	0.059038010795407	0.579893610416486	-4.57306709856772
Q13547	HDAC1	0.0795947064834209	3.32227432266048	2.73239795360573	0.0447744559235506	0.574766769410442	-4.57310442845362
Q5HYA8	TMEM67	0.181080023326715	3.36588379373666	1.71358990936591	0.152081891857172	0.629888102837026	-4.57405485050491
Q9NSI6-2	BRWD1	0.122978959863837	3.32787736170593	2.33786581894218	0.0708211203450373	0.589852885511626	-4.57518737933828
Q8N1F7-1	NUP93	0.127664068560946	3.33433316671036	2.95890392709518	0.0347849710015698	0.571330856959487	-4.57738565573642
Q5FBB7-1	SGOL1; SGO1	-0.228059130265543	3.25281038119846	-2.08144632727297	0.0964971415353985	0.600401339037267	-4.57869221706838
A6NDG6	PGP	-0.187767735566381	3.30204253718382	-2.35573353974402	0.069332145007856	0.587341417615064	-4.57912248393332
O75110	ATP9A	0.169394821406798	3.35793895073318	1.95403776041939	0.112832229993998	0.611287479788836	-4.57987877634358
Q96JH7	VCPIP1	0.0932453719150216	3.32472338708021	2.73209626639188	0.0447897561955789	0.574766769410442	-4.58036664608021
Q9GZX9	TWSG1	0.180775631604905	3.31550329049777	1.84256343807676	0.12952303913287	0.61592197485254	-4.58151424048473
Q9NUP1	BLOC1S4	-0.204968561540716	3.33216003728766	-1.83469157800369	0.130795284225235	0.61592197485254	-4.58246869594064
Q9HD34	LYRM4	-0.192727994045863	3.24715655782108	-1.74823981303614	0.145650155697552	0.627138273705989	-4.58304039906388
Q9BWE0-4	REPIN1	-0.199533742426597	3.24033830877064	-1.98756057095756	0.10826781075313	0.61045378725435	-4.58366386273606
A7XYQ1	SOBP	0.25909308880733	3.33624762785042	1.57189662444272	0.181530629185279	0.642485434296894	-4.58849190424645
Q3ZCT1	ZNF260	-0.24827230239646	3.24666798371044	-1.79491937543005	0.137424519218287	0.62197076402545	-4.58943345300864
Q16827-1	PTPRO	0.300128302975177	3.35984685497659	1.36874096240712	0.233876242604239	0.661910098314009	-4.59144104161632
Q9P0R6	GSKIP	0.238798460022594	3.42337190221014	1.63015576953095	0.16878283229617	0.639091196746938	-4.59188034333582
O43615	TIMM44	-0.14139166827166	3.2504395965182	-2.42144484422328	0.0641445062100302	0.585213598468076	-4.59197723451149
Q6ZN55-2	ZNF574	0.117861519613276	3.31548880112631	2.23816621058308	0.0797973420741955	0.59650499184859	-4.59249565879854
Q9P0P0	RNF181	0.205929816991487	3.3340452645984	1.69535401349043	0.15558274051226	0.629888102837026	-4.59295086486395
Q9NXK8	FBXL12	0.231446978230951	3.29808030446769	2.00203528865904	0.106357750433704	0.609345847158323	-4.59408237597215
Q96AD5-1	PNPLA2	0.15211946290983	3.36789929754626	2.01104202364479	0.105187303256618	0.607651670095057	-4.59434260060422
Q96HA8	WDYHV1	-0.28621653845369	3.32935526022849	-1.95902237951287	0.112140856356185	0.611287479788836	-4.59500935063392
Q9NYS0	NKIRAS1	-0.232399508684358	3.33256535108656	-1.9709281637481	0.110507549882112	0.611274675393022	-4.59647968557451
Q8WYQ9-2	ZCCHC14	0.156483945918458	3.33494297140699	1.84104375474584	0.129767642892805	0.61592197485254	-4.59741306439416
Q2NKJ3-1	CTC1	0.139890266336451	3.34623734213151	2.07446079973871	0.0973241154987697	0.600401339037267	-4.59745549069888
Q96N66-1	MBOAT7	0.181047553335624	3.33785388399979	1.80601290753322	0.135541158410347	0.619107450141729	-4.59746933265717
Q8IUF8	MINA; RIOX2	-0.34717385698671	3.34272096398464	-2.32921777073185	0.0715543309706436	0.589852885511626	-4.59748846142848
P35754	GLRX	-0.165984534487855	3.27892885194223	-1.87585521998507	0.124283342166077	0.61592197485254	-4.59804138414689
Q14CB8-2	ARHGAP19	-0.147160219869555	3.30636153918847	-1.98510179653469	0.108595862588624	0.61045378725435	-4.59810373638956
Q9Y4C1	KDM3A	-0.131136045225532	3.35917886837946	-2.54049907383997	0.055801093987753	0.579167513245112	-4.5987727622251
P12270	TPR	0.185135900808863	3.33379311078828	3.1819011085756	0.0273493482059916	0.567813672449573	-4.59950312541397
P17661	DES	0.154840624241528	3.30667692899548	1.89217520605858	0.121796115948389	0.61592197485254	-4.60033220730947
Q8IYQ7	THNSL1	-0.124854086423558	3.29094761156472	-2.29125020433235	0.0748729705484929	0.589852885511626	-4.60041278947137
P62917	RPL8	-0.394320540188774	3.26319520564315	-2.52434131567575	0.0568595494415143	0.579167513245112	-4.60043043459178
Q96SJ8	TSPAN18	0.203919852905725	3.30667931720423	1.63148763620771	0.168502160554984	0.639091196746938	-4.60051294941756
Q96GF1-1	RNF185	0.204479799218917	3.35256503525344	1.58454647848778	0.178683170272134	0.640890926905665	-4.60215867319228
Q96AJ9-2	VTI1A	0.143500571416886	3.35779963582991	1.93313548134089	0.115780726327686	0.613199272208859	-4.60225227395465
Q8TEU8	WFIKKN2	-0.283961212429369	3.31463814507736	-1.61200581125587	0.172654905031884	0.639221410600478	-4.60336802090859
O75808-1	CAPN15; SOLH	0.170606181057577	3.31578844816252	1.86132149023742	0.126543034669216	0.61592197485254	-4.60477834310848
Q8WYL5-1	SSH1	0.174587280099607	3.31993407740643	1.7095571856844	0.152849091959062	0.629888102837026	-4.60620414759952
P16402	HIST1H1D	-0.201896811925312	3.32120826294934	-1.94137693918888	0.114608597006544	0.612936540749083	-4.60682864637542
P49427	CDC34	-0.513640355274361	3.37411811940344	-1.85984381267348	0.126775172379211	0.61592197485254	-4.60714151622789
Q14728	MFSD10	0.18240856059629	3.31736825233868	1.72974782150126	0.149047217204933	0.629888102837026	-4.60908896045385
Q96T37-1	RBM15	0.141008091336442	3.32814325660162	2.58295944052371	0.0531224147865578	0.576599543829097	-4.61069063081079
O94887-1	FARP2	0.131501082317913	3.30095492500538	2.10469954412058	0.0937980935810034	0.600401339037267	-4.6122420220706
O75953-5	DNAJB5	-0.22216698065896	3.32665507127269	-2.14926330038321	0.0888492255274714	0.600401339037267	-4.61313813179299
Q9ULN7-5	PNMAL2; PNMA8B	-0.364243876026851	3.25624541801892	-1.19233450406732	0.290753788286919	0.695476671699664	-4.6135835978719
Q13496	MTM1	0.160499788511509	3.33048302282433	1.92663148534678	0.116714654676305	0.613199272208859	-4.61391469987182
Q9NRR5-1	UBQLN4	0.0827237900632442	3.34149839040853	2.44671480155024	0.0622644938172679	0.584370312796309	-4.61461476472065
P22570-7	FDXR	-0.189996135741183	3.28977548307194	-2.16941429426007	0.0867043540995189	0.597945326025167	-4.61466513455001
O75077	ADAM23	0.261078797328031	3.3615587806709	1.36588477889603	0.234707468703335	0.661910098314009	-4.61553811293742
O15550	KDM6A	0.129923058690084	3.32266354307445	2.46466348756424	0.0609660854864025	0.581893756626096	-4.61696588361353
P13995	MTHFD2	-0.145288136921995	3.24364327948064	-2.29975387612359	0.0741153445246497	0.589852885511626	-4.6184136773086
Q9UHQ1-2	NARF	-0.102579550365047	3.30252924077303	-2.35219595818099	0.0696241991422228	0.587341417615064	-4.61913025896625
Q96NY9	MUS81	-0.263485152749462	3.31804137450214	-1.8662421992499	0.125773201709702	0.61592197485254	-4.62002967745551
P78417	GSTO1	-0.451497305534443	3.35814274015518	-2.24225002351968	0.0794062673200354	0.59650499184859	-4.62015481754801
Q8TF72	SHROOM3	-0.102561246051668	3.31133950599495	-2.379125572378	0.0674344316875299	0.585241326815686	-4.62019450501074
P51157-1	RAB28	-0.159676414504121	3.81333477147711	-1.76115118014436	0.143325487705231	0.626303905597185	-4.62069007176202
Q08211	DHX9	0.144328947345321	3.34238844861212	3.19358931479951	0.0270127535534679	0.567813672449573	-4.6217614648216
P57740	NUP107	0.17995004192844	3.31941085216111	2.59382191235955	0.0524603213563728	0.576473125197233	-4.6223655980005
Q8WVK7-1	SKA2	-0.140839008116224	3.29348022988299	-1.97958680444445	0.109335511736958	0.61045378725435	-4.62664974152907
Q8IWE5	PLEKHM2	0.121088178610256	3.32131665514152	2.17505795123575	0.0861137022587987	0.597945326025167	-4.62722089830092
Q96MD2	C12orf66	0.190316932810614	3.20756328933683	1.77822833874297	0.14030928904907	0.622720080031207	-4.62742725513483
Q8N0T1	C8orf59	-0.256476698015496	3.22032144239313	-2.04283461832722	0.10116402573677	0.603321417480837	-4.62812615012101
Q13216-1	ERCC8	-0.25182269647328	3.3423353578642	-1.85241447384252	0.127949041442019	0.61592197485254	-4.62817630366709
Q2V2M9-3	FHOD3	0.117739624436065	3.31322158358005	2.43515181405292	0.0631171026066169	0.585213598468076	-4.62897609940513
Q9ULQ0-1	STRIP2	0.160672805949729	3.3348918521983	1.79239773942295	0.137856382971071	0.62197076402545	-4.62899327994902
Q8WVE0	N6AMT2; EEF1AKMT1	-0.227451252283228	3.32396608633652	-1.72471668172715	0.149985434642309	0.629888102837026	-4.62979191444389
Q14563	SEMA3A	-0.218137662444578	3.29845116946137	-1.48875481404562	0.201399288139508	0.645867981426319	-4.62980403982944
Q9Y287	ITM2B	0.194368438952453	3.2934753122617	1.71734828565566	0.15137042564075	0.629888102837026	-4.63131877062593
Q9Y2U8	LEMD3	0.255420132042586	3.31204410221536	2.26496935067373	0.0772682864720888	0.593101690636586	-4.63196928429643
Q96GN5-1	CDCA7L	0.175818443558951	3.34453610862552	1.83574264806438	0.130624661850158	0.61592197485254	-4.63300562232412
P14927	UQCRB	-0.160951963288965	3.24812658823132	-2.09725653528607	0.094653110038892	0.600401339037267	-4.63337328757158
O60909-3	B4GALT2	0.21659034379641	3.38674528914408	1.53529909963857	0.190025527695333	0.643990742670535	-4.634635003466
Q6IEE7	TMEM132E	0.163485362136895	3.36579193255185	1.82428212927143	0.132497628699557	0.616905436065609	-4.63477357927392
Q9HBM1	SPC25	-0.404567686835045	3.36454752194301	-2.00924705632948	0.10541946791112	0.607754146222284	-4.63491088275994
Q86U90	YRDC	-0.357438413445516	3.34776516959827	-1.84493496704936	0.129142283017277	0.61592197485254	-4.63609011698565
P32856	STX2	0.167274731815639	3.3453168202155	2.06094307763406	0.0989459881940221	0.600401339037267	-4.63707006504788
Q6L8Q7-1	PDE12	-0.108086458434383	3.30259856134078	-2.17921650679322	0.085681257546691	0.597945326025167	-4.637835791732
Q9Y2Y1	POLR3K	-0.263022599520463	3.31620386287257	-1.75001481041964	0.145328287251041	0.627138273705989	-4.63889854740705
Q15814	TBCC	-0.243724402216772	3.32881942474824	-1.9833788167163	0.10882637125115	0.61045378725435	-4.63894662016039
Q7Z5N4-1	SDK1	0.265783028880387	3.36539131586919	1.35000196627473	0.239381333724718	0.663535940296454	-4.63898498123947
Q6Y1H2	PTPLB; HACD2	0.19660321982128	3.31912522467099	1.61782912485958	0.171402936306215	0.639221410600478	-4.63898728457069
P58557	YBEY	-0.192760212748811	3.29874468544323	-1.629537034146	0.168913382059504	0.639091196746938	-4.64117804205568
P61968	LMO4	-0.146836352367782	3.29832332289645	-1.82889448816006	0.131740508776641	0.61592197485254	-4.64126259046387
O75071	EFCAB14; KIAA0494	0.205134024027545	3.32907595049791	1.6714792096348	0.160290509808021	0.629888102837026	-4.64250492242958
O43462	MBTPS2	0.184968606856076	3.32402792739511	1.66136257778998	0.162328752889509	0.632323590694833	-4.6429803970543
P51798-1	CLCN7	0.128344022490217	3.32952913881141	2.15908651194022	0.0877965840295137	0.600401339037267	-4.64420919450339
Q12770	SCAP	0.146431102282849	3.33126755342067	1.87002695959977	0.125184412089166	0.61592197485254	-4.64431985623054
Q8IY17-4	PNPLA6	0.134629200940969	3.32241902447152	2.18913689485466	0.084659087814398	0.597945326025167	-4.64441263231745
Q92922	SMARCC1	0.117581638665247	3.33301845951361	2.66123192022525	0.0485515170405772	0.576473125197233	-4.64452891190389
Q15113	PCOLCE	0.136319450799085	3.32207961246277	2.18717410987957	0.084860277400338	0.597945326025167	-4.64467100009142
P02452	COL1A1	0.241242789477028	3.34765387315703	1.478443854573	0.204008034605946	0.64872967422434	-4.64532796308312
Q9NSD9	FARSB	-0.190214257215206	3.32870779350601	-2.61677841932196	0.0510910859216373	0.576473125197233	-4.64537662016657
Q9Y2G1	C11orf9; MYRF	0.186094112217231	3.32896351512363	1.91660484788256	0.118169962203159	0.613199272208859	-4.64560795219852
P48380	RFX3	0.125052074643465	3.32636892033573	2.01772486022408	0.104327695715648	0.606468390157352	-4.64581733336647
Q8TCP9	FAM200A	0.278280760348248	3.3157857482802	1.51883541398499	0.193974390866782	0.645214375174956	-4.64659092360498
O94779	CNTN5	0.338193868376127	3.30025373617749	1.15093510877301	0.305824884052031	0.703464744331603	-4.6466840982788
O00311-1	CDC7	-0.133250828667399	3.27342241168846	-2.36390911801666	0.0686623126978994	0.585383537405773	-4.64959553443038
Q3KQZ1-1	SLC25A35	-0.256784983663292	3.51102112632306	-1.55354089714933	0.185743063502975	0.642485434296894	-4.65025302844046
O95479	H6PD	0.238549989489867	3.34401763756648	1.51114850364997	0.195845751059589	0.645214375174956	-4.65051842008724
O00451-1	GFRA2	0.150753860049508	3.3547303699355	2.34869977933137	0.0699141598475365	0.587341417615064	-4.65069103628364
Q96JN0	LCOR	0.12645857510717	3.32707743174876	2.09753341843311	0.0946211538861286	0.600401339037267	-4.65201793699128
O00400	SLC33A1	0.143076716700473	3.3320123508553	1.98833009458905	0.108165356035136	0.61045378725435	-4.65211890825239
O43920	NDUFS5	-0.172762921834995	3.29692132025001	-2.10454927195963	0.0938152739718405	0.600401339037267	-4.65299826835652
Q9UPZ9-1	ICK	-0.261186261540621	3.3042716168968	-1.29942026246199	0.254859890709051	0.673893364986999	-4.65309408272104
Q8N1S5-1	SLC39A11	0.203172282102976	3.30133657847022	1.50461737317162	0.197449704757746	0.645214375174956	-4.65315413565194
Q9BUT9-1	FAM195A; MCRIP2	-0.352905758789889	3.33812267084414	-1.10832793416621	0.322060798166571	0.710284560528292	-4.65349932626827
Q9H490	PIGU	0.180289989643153	3.33966503402711	1.84180148620339	0.12964562063959	0.61592197485254	-4.6535734725619
Q8WV22	NSMCE1	0.132788070464337	3.32861161672845	2.04765602902323	0.10056833643201	0.602687025519223	-4.65455151679557
Q6XE24	RBMS3	0.156430734397668	3.33188876100099	1.8780833413828	0.123940659829215	0.61592197485254	-4.6552229937463
Q7Z6L0-2	PRRT2	0.353399500457699	3.40675229936056	1.06737797225755	0.338375192754276	0.724041730896042	-4.65572413695645
Q3KRA6	C2orf76	-0.416508991371853	3.35311555932919	-1.45920757384853	0.208963543206513	0.6500755924844	-4.65698688552692
Q8N3Z3-1	GTPBP8	-0.185863761566891	3.25017972166621	-1.65527947799558	0.163566962867799	0.635176224633546	-4.65773030165383
Q9BWH6	RPAP1	0.112503362225438	3.31906387120276	2.45940966560138	0.0613430263949727	0.581893756626096	-4.65790282358127
Q8NFJ9-2	DPP3; BBS1	0.14472250902762	3.3072329505054	1.83637797960973	0.130521639397436	0.61592197485254	-4.65870082658635
A8MVW0	FAM171A2	0.151501806480896	3.32788551511914	1.97639665076324	0.109765795312641	0.61045378725435	-4.659725943731
Q9H469	FBXL15	-0.33234547478563	3.40239209131532	-1.4884277099809	0.201481543618521	0.645867981426319	-4.66128560844432
O14657	TOR1B	0.117809419135801	3.34686353330118	2.13650990903809	0.0902361846310902	0.600401339037267	-4.66129363523409
Q99835	SMO	0.232645821347195	3.32849442570065	1.37823099828394	0.23113451093604	0.660751868944375	-4.66153320816438
Q9NX55-2	HYPK	0.202043974994617	3.29695757273771	1.57316194504836	0.181243781980073	0.642485434296894	-4.6636310625608
O43292-1	GPAA1	0.135171534667883	3.34110840464566	2.17085229153245	0.0865534427461638	0.597945326025167	-4.66537236948223
O15305	PMM2	-0.483570375585817	3.34638020698472	-2.30015808581188	0.0740795406739725	0.589852885511626	-4.66685443981128
Q9UBZ4	APEX2	-0.154761724081574	3.28080016185619	-1.78862742204641	0.138504718030341	0.622141026048865	-4.66803386001612
Q96GW9	MARS2	-0.148586385206677	3.26656148543592	-2.01493472522411	0.104685677333537	0.607276496539471	-4.66834928910424
Q9H9L3	ISG20L2	-0.154472663355431	3.30737482205391	-2.08297832639542	0.096316784493095	0.600401339037267	-4.66848853627546
Q8TAA5	GRPEL2	-0.163395659663723	3.25427028687031	-1.76751349565996	0.142194033615665	0.625016791688795	-4.67001707932395
Q7Z7L8	C11orf96	-0.226535729181281	3.33658323911063	-1.49652584913821	0.199454796752918	0.645214375174956	-4.67011348089383
Q9NUP7-1	TRMT13	-0.0948576975518909	3.31635751709042	-2.27502140997602	0.0763423962796603	0.591990898034649	-4.67022158007059
Q9NXF8-1	ZDHHC7	0.220282209588572	3.25133799981822	1.57843830895149	0.180052498997392	0.64196648059977	-4.67156194069715
Q9NQP4	PFDN4	0.16346507866675	3.35661691019476	1.96748175172024	0.110977748138064	0.611287479788836	-4.67197640025662
Q92947-1	GCDH	-0.170288014264505	3.27639006352049	-2.20408054115265	0.0831441395272778	0.597945326025167	-4.67251558728288
Q9P016	THYN1	-0.233501147777087	3.3361106412778	-2.23556450132112	0.0800475774362582	0.59650499184859	-4.67360220942199
Q9Y561	LRP12	0.178390848225873	3.33198674800155	1.60591339954169	0.173974558387259	0.639221410600478	-4.67425157675336
Q16799-1	RTN1	0.179641885502176	3.34827448030102	1.80792276691537	0.135219624762088	0.619107450141729	-4.67452484756409
Q96DN5-1	TBC1D31; WDR67	-0.184135981422923	3.29518697515919	-1.59552789165073	0.17624748289944	0.639221410600478	-4.67546799136686
Q99797	MIPEP	-0.129410124680579	3.27086928625141	-2.26552198232016	0.0772170676224114	0.593101690636586	-4.67561506790692
A0AVI4	TMEM129	0.248107703846391	3.33329437242095	1.31340873645409	0.25048752407025	0.67222544106081	-4.67623082372492
Q13642-4	FHL1	0.10706444240797	3.33521613357563	2.43546922333076	0.063093527032294	0.585213598468076	-4.67642172453497
Q5SW79-2	CEP170	0.202706531352537	3.32417826133354	1.66982863870806	0.160621277744288	0.630088927659475	-4.67785069841611
Q68DH5	LMBRD2	0.162202306876402	3.32720444490872	1.99201068158798	0.107676739701211	0.61045378725435	-4.67871034328355
O15294	OGT	-0.121333363032682	3.32332594293508	-2.58832661355169	0.052794117749324	0.576473125197233	-4.6789499194433
Q96IU4	ABHD14B	-0.602097645822308	3.38021084679657	-1.84479328505741	0.129164997732244	0.61592197485254	-4.67980553302066
Q8TAT5	NEIL3	-0.127489823816656	3.29920537383226	-1.99082372561698	0.107834058032927	0.61045378725435	-4.68013642724744
Q5JTZ9	AARS2	-0.10859158642116	3.27599983605943	-2.3107054227301	0.0731519255347146	0.589852885511626	-4.680205866861
O95372	LYPLA2	-0.727096361916633	3.368521389192	-2.08388901546341	0.0962097431406539	0.600401339037267	-4.68067075140656
Q6PJ69	TRIM65	-0.195280424533106	3.29293503831576	-2.0270113516647	0.103145558378929	0.603383420804736	-4.68101900694121
Q9BW83-1	IFT27	-0.313985501905365	3.34576362619048	-2.0686139052828	0.0980221196012893	0.600401339037267	-4.68129922506204
Q96D15	RCN3	0.187078796863457	3.3115767800002	1.55029239399219	0.186498616520235	0.642891375556706	-4.68188534528707
O43491-1	EPB41L2	0.128861139619352	3.3125497302548	2.73904497811278	0.0444388310934701	0.574766769410442	-4.68411701743022
Q9Y316-3	MEMO1	-0.209754040533963	3.29568367188486	-1.60200619460403	0.174826203655012	0.639221410600478	-4.68434984095583
P19256	CD58	0.23004531963407	3.34268863515781	1.43069470391921	0.216525039662424	0.653616529153469	-4.68477532042678
Q9BQ83-1	SLX1B; SLX1A	0.209789033618161	3.31311677012506	1.41036221864617	0.222078292351713	0.656751091946315	-4.68857139060279
Q8TEH3	DENND1A	0.123879580623006	3.29726508599719	2.02610553960209	0.103260235553516	0.603630661692925	-4.6892602474651
Q9H2V7	SPNS1	0.162153882052432	3.33727356540515	1.67013203852554	0.160560425717682	0.630088927659475	-4.69052047001446
Q5QJ74	TBCEL	-0.362615652622711	3.34510842196019	-2.03886831018338	0.101656885443422	0.603321417480837	-4.69074385161632
Q9NYY8	FASTKD2	-0.132945813569527	3.25395619480611	-2.23329376797021	0.0802666752801209	0.59650499184859	-4.69091433653505
P54886	ALDH18A1	-0.0935258201295491	3.28932774954975	-2.71654031205177	0.0455866913339851	0.574766769410442	-4.69114836631087
Q86Y39-2	NDUFA11	-0.187864219981683	3.26450332524335	-1.58195040424235	0.179263882543701	0.640890926905665	-4.69126781863789
Q9UK33	ZNF580	0.192710064887948	3.32085660600082	1.49534435073979	0.199749242656918	0.645485366336148	-4.69204881611764
Q9UIC8	LCMT1	-0.139288233681512	3.31756191537254	-2.17326302530534	0.0863010826326132	0.597945326025167	-4.69303261167182
Q96GL9	FAM163A	0.203126376531284	3.33507850882499	1.43171619180818	0.216249618739069	0.653616529153469	-4.69372841821525
Q8N6G5-1	CSGALNACT2	0.217506367384698	3.31156364837186	1.416462544951	0.220397880894217	0.655219948336017	-4.69425712073375
Q5BKX5-1	C19orf54	-0.356523073993191	3.32877039205776	-1.68261991581554	0.158075964615529	0.629888102837026	-4.69558292725294
O43861-1	ATP9B	0.201048734703614	3.33250501879076	1.44101613267626	0.213757662649004	0.653237312675131	-4.69593036603339
Q499Z4	ZNF672	-0.198782116131897	3.28316268206885	-1.55332321544107	0.185793597835454	0.642485434296894	-4.69692842660656
Q6P4E1-4	CASC4	0.160986597291113	3.32958879473013	2.24040688359931	0.0795825121187965	0.59650499184859	-4.69718088398434
P00533-1	EGFR	0.116822550477422	3.32502857829166	2.30504523222892	0.0736481402911921	0.589852885511626	-4.69763627210206
O94906-1	PRPF6	0.0991636689596135	3.31819370677665	2.85230729889509	0.0391333666965093	0.574766769410442	-4.69827625174968
Q96KQ7-2	EHMT2	0.106049102149311	3.3586821588698	2.50303430815467	0.0582894971138293	0.579893610416486	-4.69896602897478
Q15287-1	RNPS1	0.126028718238789	3.3241724415425	2.31945258010109	0.0723922504764138	0.589852885511626	-4.69901856614216
P28288	ABCD3	0.138447262682053	3.31874310224707	2.42282993696738	0.0640398547900833	0.585213598468076	-4.70008919953937
Q9NW81-4	ATP5SL; DMAC2	-0.221317767561096	3.25754795014868	-1.39209572497036	0.227184090960532	0.65775315876855	-4.70054504701143
Q01813	PFKP	-0.0738331071472832	3.33729643107311	-2.66980684747136	0.0480780410724826	0.576473125197233	-4.70075438202711
Q9H4B0	OSGEPL1	-0.174457882159821	3.27042267109869	-1.76729177988309	0.142233307801541	0.625016791688795	-4.70133941151454
Q96EK2-3	PHF21B	0.13182318704992	3.34315577806603	1.93514942724359	0.115493135115688	0.613199272208859	-4.70170927035758
Q14134-1	TRIM29	-0.17936326656536	3.32687597784038	-2.08226873207206	0.0964002777342376	0.600401339037267	-4.70201094561662
P26992	CNTFR	0.124850358711662	3.36096247193693	1.96436206395651	0.111405194460844	0.611287479788836	-4.70286240866562
Q13155	AIMP2	0.0986316216966583	3.32741718188152	2.40588663028969	0.0653330364874251	0.585213598468076	-4.70403118345653
Q71F56	MED13L	0.106543740400074	3.3325193939854	2.14831071868392	0.0889520236655384	0.600401339037267	-4.70474890447769
Q9BRK5-1	SDF4	0.164703764517162	3.32148996715159	2.35172303003713	0.0696633449722586	0.587341417615064	-4.70489166258283
Q96ME1	FBXL18	0.110583694110779	3.32149842828218	2.08326964327398	0.0962825295832684	0.600401339037267	-4.70801470670762
O00746	NME4	-0.307271760939129	3.34432871455211	-1.87460939767346	0.124475379646811	0.61592197485254	-4.70806688128023
Q6R2W3	SCAND3; ZBED9	0.289093581402989	3.33616149721245	1.0694910181609	0.33751608621018	0.72327354618202	-4.70855503914488
Q99808-2	SLC29A1	0.175029217371133	3.3180334865368	1.57402625490359	0.181048103423327	0.642485434296894	-4.70969947306619
P82673-1	MRPS35	-0.246644437156088	3.21143106495564	-2.1462298815973	0.0891770235598005	0.600401339037267	-4.70984787213824
O95825-1	CRYZL1	-0.2292365663104	3.33907067554887	-2.1471250815571	0.0890801510051763	0.600401339037267	-4.71001606511013
Q9Y5K8	ATP6V1D	-0.110046322940678	3.31662884598958	-2.1429693273955	0.0895308189275094	0.600401339037267	-4.71283265004209
Q9Y618-1	NCOR2	0.12950898287398	3.32434112221426	2.54896928033726	0.0552549791716562	0.579167513245112	-4.71416832101715
Q9Y4D1	DAAM1	0.163787192328016	3.31300817080728	2.12685710544493	0.091301430242085	0.600401339037267	-4.71443192821363
Q14241	TCEB3; ELOA	-0.272490680999456	3.24616261870191	-2.24509721640735	0.0791348454941358	0.59650499184859	-4.71501233156832
Q32P41	TRMT5	-0.255975600407306	3.33953433284	-2.3149496616366	0.0727822389403299	0.589852885511626	-4.71503931920805
P24666-1	ACP1	-0.190729275925974	3.32160992875619	-1.98643852829908	0.108417384274256	0.61045378725435	-4.71507773330229
Q13371	PDCL	-0.121080903110348	3.30743561094517	-2.0093711850447	0.105403395354508	0.607754146222284	-4.71520480394496
Q8IZ52	CHPF	0.151528187740638	3.3413157324323	1.85292233776453	0.127868437010269	0.61592197485254	-4.71602504102422
Q01082-3	SPTBN1	0.217008813718523	3.28341836287586	1.60405892384977	0.174378254650984	0.639221410600478	-4.716039501297
Q5JTC6-1	AMER1; FAM123B	-0.212778978291726	3.29687111086153	-1.42038905303754	0.219322769714947	0.653865270937632	-4.7161319556181
Q9C0A6	SETD5	0.142690594394146	3.30098560038862	1.98827023999927	0.108173321416893	0.61045378725435	-4.71674157102515
Q96T92	INSM2	-0.156493981439881	3.32210051896277	-1.78031965841455	0.139944439439782	0.622720080031207	-4.7173463532817
C9JH25-1	PRRT4	0.217431571346843	3.32490906197102	1.32496491620701	0.2469286875316	0.669729302008042	-4.71736110035899
O15040	TECPR2	0.181703747975562	3.33838974125443	1.67180320886337	0.160225662809332	0.629888102837026	-4.71832375542267
P36897-2	TGFBR1	0.128257902069016	3.36629369220794	1.98393107521749	0.108752431043175	0.61045378725435	-4.7189391562631
O60237	PPP1R12B	0.12766738386468	3.32581148335565	2.01238836328698	0.105013521421367	0.607276496539471	-4.71924545855985
Q9BQF6	SENP7	0.144763567195613	3.31359089588621	2.26930477014432	0.0768674627328252	0.592393159220944	-4.72090940598025
Q9UF56-1	FBXL17	0.162306652689081	3.33899578336089	1.62432611832364	0.170016898961911	0.639221410600478	-4.72133997418282
Q13188-2	STK3	0.178147084090142	3.36971390869718	1.81814060644732	0.133512778629386	0.617352374730627	-4.72156466782601
Q7L2K0-1	C16orf59	0.186709708692857	3.30204012312364	1.55850175187731	0.184595106871094	0.642485434296894	-4.72296239633579
Q15906	VPS72	0.145600244471624	3.3232680628663	1.86177233960255	0.126472296211194	0.61592197485254	-4.72329150780296
Q9UNL2-2	SSR3	0.190026421142901	3.33093114958287	1.53663773561463	0.189707968504928	0.643990742670535	-4.72338484676862
Q8TEA1	NSUN6	-0.259347040797803	3.33679260873197	-2.12950803766519	0.0910075436109308	0.600401339037267	-4.7239730327019
Q7Z5G4-1	GOLGA7	0.151751241038417	3.31849209974824	1.72942717227054	0.149106832898304	0.629888102837026	-4.72515219688538
O00161	SNAP23	0.14347990808822	3.35732601160584	1.91947044613701	0.11775210102359	0.613199272208859	-4.72542656612242
O75716	STK16	0.190151674185306	3.36486235719359	1.57016524064902	0.181923865930617	0.642485434296894	-4.72575948904419
Q9Y6Q2-3	STON1-GTF2A1L; STON1	0.124977359580767	3.33952251215771	1.93300780569543	0.115798983786247	0.613199272208859	-4.72633709857025
Q8NCJ5	SPRYD3	-0.253038349194505	3.33431615867862	-0.461753884070793	0.665179112623371	0.875690418524826	-4.72694394810279
Q96MU7-1	YTHDC1	0.109709069097622	3.35788599269792	2.26319996762499	0.0774325247128064	0.593269784931943	-4.72793749960659
Q9Y575-3	GPR75-ASB3; ASB3	0.184175039674615	3.30540014260607	1.68323424676547	0.157954756181514	0.629888102837026	-4.72852685328119
O76062	TM7SF2	0.210112402408467	3.32821312057341	1.41433005383917	0.220983903906247	0.655792745803659	-4.72863336570589
P98173-1	FAM3A	0.177200913310338	3.29317107706649	1.51905668435175	0.193920785006302	0.645214375174956	-4.72907201071707
Q9BTP7	C19orf40; FAAP24	-0.258251806443167	3.27375197838999	-1.1287682028645	0.314178857602889	0.705203040299361	-4.72922511427441
Q7L576-1	CYFIP1	0.098068676136593	3.32760006887278	2.59653305745203	0.0522965065306798	0.576473125197233	-4.72923579682165
Q16623	STX1A	0.15003645100399	3.34266407993312	1.79397508184115	0.137586078044312	0.62197076402545	-4.72990564433846
Q96EX2-1	RNFT2	0.162281842296797	3.32579612286487	1.86984722504903	0.125212307929802	0.61592197485254	-4.73054790306023
Q14689	DIP2A	0.107773147950203	3.30623108103206	2.30954540460517	0.0732533232614838	0.589852885511626	-4.73066202264308
P07947	YES1	0.159840976594152	3.3712471835794	1.82583336133397	0.132242490568656	0.616905436065609	-4.73165667073902
O00559-2	EBAG9	0.16119968331016	3.3449084943299	1.85839408320245	0.127003351226306	0.61592197485254	-4.7322077573742
Q13404-1	TMEM189-UBE2V1; UBE2V1	-0.25241182378711	3.35117086671193	-2.37944759739526	0.0674087078305473	0.585241326815686	-4.73235480561224
Q9NUL7	DDX28	-0.132613701404244	3.27560950219554	-2.15893474471028	0.0878127445944808	0.600401339037267	-4.73240912402554
P08670	VIM	0.143607880635645	3.3073441786561	2.60190608844739	0.0519735336403476	0.576473125197233	-4.73337785462346
Q9BTK6	PAGR1	0.225456869230036	3.27338278343742	1.32665514208561	0.246412176545601	0.669729302008042	-4.73399600655041
Q7Z7L7	ZER1	0.133824375606214	3.2867221836115	2.08676186903955	0.095872904712334	0.600401339037267	-4.73410604433514
Q8N2Q7-1	NLGN1	0.183085324808257	3.33223671138213	1.62889272980679	0.169049434840091	0.639091196746938	-4.73415193677522
Q92823	NRCAM	0.122726975879702	3.33719152818841	2.23995229678744	0.0796260459049067	0.59650499184859	-4.73464588397965
Q96GS6-2	ABHD17A; FAM108A1	0.225638936199314	3.28420688603223	1.27583135731291	0.262395136016382	0.67809981846355	-4.73497471265226
Q17R89	ARHGAP44	0.146411699905998	3.31805172486604	1.74906816456177	0.145499855893524	0.627138273705989	-4.73555739307953
Q9Y6M5	SLC30A1	0.16619994726058	3.31588078344127	1.79643514524771	0.137165596733509	0.62197076402545	-4.7357424591615
Q9HCD5	NCOA5	0.18626175342019	3.31899601304181	2.37270457035182	0.0679496070114356	0.585241326815686	-4.73665110908802
Q96PN7	TRERF1	0.14736201795568	3.31273135939548	1.90789449583042	0.119449693468295	0.61592197485254	-4.73746123233913
Q5TEU4	NDUFAF5	-0.220278603231542	3.30558549081156	-1.25796773216826	0.268238874041806	0.679952184364404	-4.73826993457426
P09669	COX6C	-0.184483742149192	3.28252005959208	-1.78250387468946	0.139564428055526	0.622442137443715	-4.73847565501971
Q8WXH0-2	SYNE2	0.212048737478536	3.33493977653374	3.09778505253071	0.029918120416468	0.571330856959487	-4.73849210756548
Q00765	REEP5	0.162117141413059	3.33273609960257	1.77203747132385	0.141395102324718	0.623634694697802	-4.73864413509584
Q9BYG0	B3GNT5	-0.331040884878334	3.51910419461419	-1.11184145722012	0.320693661755307	0.708722790135801	-4.73891275610686
Q5SR56	HIATL1; MFSD14B	0.26714395863675	3.40619482760994	1.55134331556866	0.18625385461044	0.64263747186781	-4.73900697979697
Q8NE00	TMEM104	0.286573090070949	3.22876853372061	1.34672716695915	0.240355948358383	0.664075414482031	-4.73950973398134
Q9Y305-1	ACOT9	-0.115205790338854	3.27915622422297	-2.18717022419926	0.0848606762028832	0.597945326025167	-4.74106034481155
Q96HP4	OXNAD1	-0.2824297400302	3.33388009820626	-1.7845550139649	0.139208539073165	0.622442137443715	-4.74285817729822
Q6NUQ4	TMEM214	0.185217567806862	3.33934366654485	1.90164018770619	0.120377547275687	0.61592197485254	-4.74286426883674
P13861	PRKAR2A	-0.0942439037064069	3.31398520214017	-2.28136196492441	0.0757645880300202	0.589852885511626	-4.7432658492351
P10909-2	CLU	0.149046988179932	3.34441260824457	1.86381628433567	0.126152117539965	0.61592197485254	-4.743569014031
Q6ZSS7	MFSD6	0.246936089945508	3.31722431624198	1.23387683079203	0.276310399942791	0.68429505642465	-4.74386220245475
Q08257	CRYZ	-0.270164643228243	3.32154441211479	-2.17467213771502	0.0861539419770863	0.597945326025167	-4.74448238050579
Q96JJ6	JPH4	0.157608353434328	3.31764797443994	1.6043845921406	0.174307292777974	0.639221410600478	-4.74451253660894
Q9BRK4	LZTS2	-0.128119535308068	3.327766516768	-1.83482257272786	0.130774006948247	0.61592197485254	-4.74581809111993
Q12931	TRAP1	-0.0692712885459289	3.28013992688206	-2.71212742843662	0.0458156500690849	0.574766769410442	-4.74633135023631
Q02548-1	PAX5	0.188677649158065	3.33376351528398	1.41168297982037	0.221713427948969	0.656135087179865	-4.74643320774703
Q8IXM6-1	NRM	0.210659430512935	3.32747666810684	1.76542713285699	0.142564049077077	0.626140101742104	-4.74702092713149
Q53RE8	ANKRD39	-0.164123149882803	3.31476942163042	-1.80108284068155	0.136374822182827	0.620196681787261	-4.74712739785413
P08236	GUSB	0.123065671704624	3.34952583375577	1.94109961171739	0.11464783560386	0.612936540749083	-4.74945787585173
Q8NF91	SYNE1	0.161468320651248	3.3177616180432	1.66986512156622	0.160613959245518	0.630088927659475	-4.75126263526271
Q9Y2E8-2	SLC9A8	0.231696564358907	3.34841295089635	1.2105998830548	0.284320543154168	0.689706749420923	-4.75157078626585
Q96T23	RSF1	0.147291225006417	3.3346569991186	2.72096194107544	0.0453585644923286	0.574766769410442	-4.75177276628968
Q8N3X6-1	LCORL	0.12500921347464	3.3228798010691	2.06944566193637	0.0979224986554048	0.600401339037267	-4.75240056803446
Q99551	MTERF; MTERF1	0.220598651811325	3.39428456702987	1.52831031626128	0.191692008748072	0.645057578060008	-4.75322225685312
Q9BYG3	MKI67IP; NIFK	-0.175470282885572	3.2962313629167	-2.15856367587348	0.0878522704644375	0.600401339037267	-4.75415868691549
P58335-4	ANTXR2	0.112404354028304	3.34026755087866	1.94786763063541	0.113694270611614	0.612611556046713	-4.7558665899321
Q99543-1	DNAJC2	-0.14158999595557	3.28195388916121	-2.32322273518127	0.0720674811832534	0.589852885511626	-4.75596000314307
Q12891	HYAL2	0.209552812509732	3.37444310530851	1.43095994549224	0.216453490698475	0.653616529153469	-4.75629005088231
Q9BZV1	UBXN6	-0.163959970379712	3.30625556491116	-1.95668846494828	0.112464015193807	0.611287479788836	-4.75650627974791
Q9H792	PEAK1	0.137572232593972	3.3136170026734	1.97331305516244	0.110183409535115	0.610697408168029	-4.75715287382972
P41208	CETN2	0.119827864778124	3.34157674794405	2.08350670508877	0.0962546639534241	0.600401339037267	-4.75749743893399
P62249	RPS16	-0.0703245157725921	3.31499202351522	-2.54863253747878	0.0552765769976978	0.579167513245112	-4.7582136397023
Q86W74	ANKRD46	0.148584649840152	3.3267876155026	1.76199703256793	0.143174531493846	0.626303905597185	-4.75920740072558
Q96GD0	PDXP	-0.483967742805832	3.35673635426902	-2.04317774077854	0.101121508621631	0.603321417480837	-4.75952170909918
Q99549	MPHOSPH8	-0.0940608295636658	3.32459438358653	-2.28417906910593	0.0755093982492365	0.589852885511626	-4.7597817554685
Q9BSK4	FEM1A	-0.117333184062762	3.28825115945967	-1.90830500413671	0.119389055778779	0.61592197485254	-4.7598271797952
P62736	ACTA2	-0.123686262587087	3.30730884765577	-2.61744505452722	0.0510519240877199	0.576473125197233	-4.76090695572938
Q15937	ZNF79	0.220351303842518	3.35762926317096	0.475017986692995	0.656375316558943	0.87299811042662	-4.76098641397211
Q13586	STIM1	0.141061550578562	3.34308811268732	2.02139304675384	0.103859036271821	0.605856491505879	-4.76154113069689
O95754-1	SEMA4F	0.16535675769143	3.3248884146663	1.53879070332906	0.189198330443734	0.643212594852759	-4.76227828782607
Q8N414	PGBD5	0.135988222336752	3.31638306782825	1.78873719850844	0.138485796668835	0.622141026048865	-4.76271657158829
Q969J3-1	LOH12CR1; BORCS5	-0.242718260021419	3.34134849037634	-1.88281338086231	0.123216456302694	0.61592197485254	-4.76294768606538
P05155-3	SERPING1	0.14765105164028	3.37468481816066	1.81734063559579	0.133645600847508	0.617352374730627	-4.76326976394949
O94766	B3GAT3	0.175583279053996	3.31726881610803	1.86536441353224	0.125910170129956	0.61592197485254	-4.76342951320805
A7MD48	SRRM4	0.228350037111604	3.29896083230118	1.21774781049288	0.2818384641938	0.687854673358035	-4.76343938893898
P63272	SUPT4H1	-0.303478679854119	3.36812242027523	-1.59313976465924	0.176774329730206	0.639221410600478	-4.76353633015774
Q9HC56	PCDH9	0.187257822260308	3.32509663329203	1.43200958896227	0.21617057360154	0.653616529153469	-4.76365588206502
Q96PM9	ZNF385A	-0.149429736545828	3.29491287662312	-2.08483246321538	0.096098985619507	0.600401339037267	-4.76457555738109
Q6V1X1	DPP8	0.128258237318619	3.32267384528796	2.11545173872074	0.0925775288107526	0.600401339037267	-4.7646560690426
P63098	PPP3R1	-0.338489514373119	3.33489921371617	-1.93903850676133	0.114939901729111	0.612936540749083	-4.76476289708443
Q9NWT8	AURKAIP1	-0.223257367339499	3.2488678549896	-1.18858208508989	0.292091675967992	0.696677615104442	-4.76560857776066
Q9BXJ3	C1QTNF4	-0.207350609776226	3.34725321500502	-0.433654126462012	0.684036128294601	0.881453882433729	-4.76605415884699
Q02543	RPL18A	-0.345889547411455	3.28413987430086	-2.57944312800154	0.0533387304883903	0.577220756495511	-4.76630415566864
Q5RL73-2	RBM48	0.246849303021462	3.3367341667808	1.13031971683389	0.313587608699911	0.705203040299361	-4.76662790428033
Q5VSG8-1	MANEAL	0.187375487702891	3.27591878848878	1.85568707651442	0.127430565237161	0.61592197485254	-4.76685273401593
P52569-3	SLC7A2	0.19918724891611	3.36111422281264	1.68785764375249	0.157045579169737	0.629888102837026	-4.76702143293812
Q6DD88	ATL3	0.166158289710428	3.33277545604907	1.78168941993181	0.139706002777974	0.622442137443715	-4.76794760696886
Q9HD47	RANGRF	-0.169510164262514	3.31401778139928	-1.60276226434936	0.174661079173789	0.639221410600478	-4.76801844245989
Q8IW45	CARKD; NAXD	-0.264320797796578	3.31609192995827	-1.86098924225739	0.126595190935584	0.61592197485254	-4.76815835884014
P10746	UROS	-0.191166434609764	3.3329277902552	-1.82195216897278	0.132881808310774	0.616905436065609	-4.76871887943669
Q13444	ADAM15	0.215969945526187	3.32947044113927	1.53514534464628	0.190062036041723	0.643990742670535	-4.77023424679245
Q9BTX7	TTPAL	0.195765382263418	3.10550626949723	1.54008369887639	0.18889291197157	0.643073646454692	-4.77116995397715
Q9NSU2-1	TREX1	0.191444113086624	3.37626808254442	1.36701943343036	0.234376917172608	0.661910098314009	-4.77227260999703
Q969U6	FBXW5	0.196162928696272	3.33837185407684	1.31364966551466	0.250412837605676	0.67222544106081	-4.7735124235345
Q9UPQ0-1	LIMCH1	0.107174686300491	3.31801699415526	2.37627389151385	0.0676626991354967	0.585241326815686	-4.77389309384622
Q6UX07	DHRS13	0.149982444789371	3.33708772873129	1.89850337209098	0.120845750722677	0.61592197485254	-4.77428922571921
O75915	ARL6IP5	-0.2436919296367	3.34938436162496	-1.30601004851798	0.252791282878123	0.67307198847172	-4.77490502109144
Q6IN84-1	MRM1	-0.17478935030887	3.26476517009993	-1.63550775278019	0.167657828193062	0.639091196746938	-4.7775775391736
O43493-1	TGOLN2	0.130866558190865	3.32670037770322	2.02418562030362	0.103503748860881	0.604630168538403	-4.77846246791912
O43542	XRCC3	-0.238782024496458	3.33298347534849	-1.64512577244345	0.165655062652979	0.636602416097472	-4.778957218547
P42356	PI4KA	0.100200738258682	3.31234138235633	2.58766965024775	0.0528341810840116	0.576473125197233	-4.78014079560747
Q9UPU5	USP24	0.0918343049769636	3.32303415175143	2.70421903656677	0.0462292016823055	0.574766769410442	-4.78138159325974
O60566-3	BUB1B	-0.0974970202585155	3.3042480183418	-2.53472537986984	0.0561767842667963	0.579167513245112	-4.78257365464685
Q9Y2B1	TMEM5	0.214147889404816	3.29633398778207	1.27306814517633	0.263291273569784	0.67809981846355	-4.7828624032764
P00505	GOT2	-0.101964797613623	3.27644499981225	-2.63184072452023	0.0502143560421584	0.576473125197233	-4.78406278936038
P82914	MRPS15	-0.312027633941328	3.15667995375602	-2.04616372713541	0.100752311011428	0.602922659433783	-4.7852636219215
O14763	TNFRSF10B	0.192364238581135	3.31660765423502	1.60917436713736	0.17326695878747	0.639221410600478	-4.78545932561771
O15013	ARHGEF10	0.0956101174088799	3.32476472723576	2.26889501830793	0.0769052486392049	0.592393159220944	-4.78586424516404
Q15084-2	PDIA6	-0.0993486077657611	3.33809648758768	-2.30850943601952	0.0733440074978759	0.589852885511626	-4.785952665636
Q5T5M9-3	CCNJ	-0.205209216535716	3.3139143774426	-1.27948605261399	0.26121423850896	0.67809981846355	-4.78613329066621
Q63HQ0	AP1AR	0.161775001426555	3.35396278578187	1.78691147105739	0.138800831217047	0.622141026048865	-4.7863763996572
P54274-1	TERF1	-0.110188432716159	3.290189473611	-2.11018109003771	0.0931736976267446	0.600401339037267	-4.78704144847231
Q969T3	SNX21	-0.247210411327749	3.3356296264543	-1.10155545882841	0.32471048566224	0.712295690530462	-4.78707610754129
Q9NTM9	CUTC	-0.152651046870225	3.33546384233228	-1.86097308685822	0.126597727580757	0.61592197485254	-4.78719122608575
Q15397	KIAA0020; PUM3	-0.149364884022861	3.27605802836695	-2.29416625555408	0.0746122205227449	0.589852885511626	-4.78779807457119
Q9Y399	MRPS2	-0.171464254646179	3.24581446522399	-1.75667505085848	0.14412705628037	0.626303905597185	-4.78792005593198
Q99873	PRMT1	0.0618917980342755	3.32046344458679	2.60233383129584	0.0519479176384212	0.576473125197233	-4.7890091084911
O75689	ADAP1	-0.307730355422899	3.32057717921537	-1.75727538195064	0.144019284080173	0.626303905597185	-4.78915014526452
Q9UBI1	COMMD3	-0.477580666398358	3.35882644015765	-1.91821656961911	0.117934749774976	0.613199272208859	-4.78943367280414
P62072	TIMM10	0.117050715181542	3.34001500799387	1.98036152408975	0.109231288215395	0.61045378725435	-4.7896580432415
Q6P1S2-1	C3orf33	0.248288602633067	3.34210620695113	0.920382431019917	0.402878987847498	0.753275343464164	-4.78974680074686
Q92804-1	TAF15	0.248185058642696	3.25971859153568	1.85292060457036	0.127868712000118	0.61592197485254	-4.7898568052314
P22415	USF1	-0.130841029903299	3.31508684063643	-1.74856892088571	0.145590421818169	0.627138273705989	-4.79020026271246
Q712K3	UBE2R2	-0.231682021805683	3.35760370412888	-1.7615780535963	0.14324928469243	0.626303905597185	-4.79078253873922
Q96SK2	TMEM209	0.277425335154197	3.3250464565657	2.07798249964148	0.0969062595546566	0.600401339037267	-4.79118825062274
P52815	MRPL12	-0.145275106933244	3.25389005155996	-2.20086704109017	0.0834674232907685	0.597945326025167	-4.79153979247298
Q8NFQ8	TOR1AIP2	0.14160211651207	3.33138906345973	1.97380147785749	0.110117150138374	0.610697408168029	-4.79170213540506
Q8WWI5	SLC44A1	0.167624292518424	3.34920909695178	1.58298326028673	0.179032618918997	0.640890926905665	-4.79284912278661
O15440	ABCC5	0.132227890069316	3.35399159709885	2.03703691840546	0.101885319740137	0.603321417480837	-4.79320212050946
Q6ZRP7	QSOX2	0.140551821830302	3.3128136319521	2.24809423982775	0.0788502286575776	0.59650499184859	-4.79342187378126
O60507	TPST1	0.213408427370548	3.28439853754014	1.89056128013844	0.122039746499044	0.61592197485254	-4.79344946304723
Q9BQG2	NUDT12	-0.168367839153196	3.32769912581182	-2.1389860792558	0.0899650836705106	0.600401339037267	-4.79364842971979
Q9NVC6	MED17	-0.123793752402467	3.33792979779345	-2.24838175272309	0.0788229830794682	0.59650499184859	-4.79421578833809
Q7L9B9	EEPD1	0.138114019261793	3.33880579689061	1.79142371394249	0.138023573147314	0.622141026048865	-4.79434852886014
Q4V328	GRIPAP1	0.117230609378602	3.31647358952887	2.42629694184212	0.0637787267508512	0.585213598468076	-4.79454392914272
Q5SNT2-1	TMEM201	0.242095275196715	3.32370622371468	1.98037051141638	0.109230079761872	0.61045378725435	-4.79481524435109
O75973	C1QL1	0.143964561183337	3.30407515849841	1.72880602850274	0.149222386554814	0.629888102837026	-4.79644075586681
P62273-2	RPS29	-0.269328713645627	3.3232228308802	-1.88638367980243	0.122672749887114	0.61592197485254	-4.79785675955688
Q96MM6	HSPA12B	0.165220280557771	3.33198972785811	1.48982201160314	0.201131153340533	0.645867981426319	-4.79801575998309
O95967	EFEMP2	0.241128432228102	3.32873570847236	0.918662930860041	0.403689783454027	0.753275343464164	-4.79806525304972
O15235	MRPS12	-0.233534845644195	3.20345621405554	-1.75578845863905	0.144286370115306	0.626303905597185	-4.79967855853081
P30281-1	CCND3	-0.190581970760146	3.24730841323555	-1.35119776075618	0.239026388302748	0.6632902706031	-4.79997250420248
Q9NPB6-1	PARD6A	0.226738429410068	3.38640196321113	0.607844066654756	0.571921766169363	0.836557263166837	-4.80045934038706
P24752	ACAT1	-0.133008338631619	3.28971627947301	-2.39267170937233	0.0663615951128558	0.585241326815686	-4.8005183479735
Q9BRA0-2	LSMD1; NAA38	-0.183592852864509	3.36970365761554	-1.64467444649248	0.165748500224904	0.636602416097472	-4.80052351598154
Q9BZE1	MRPL37	-0.145530221760426	3.27187302052425	-2.10174265332716	0.0941367712869474	0.600401339037267	-4.8006792690403
Q9NWS9	ZNF446	0.159772091137392	3.33558880708572	1.5170888930115	0.194398023486468	0.645214375174956	-4.80113750886586
Q9H307	PNN	0.0895563810166277	3.34642589148902	2.64027061317684	0.049731012313917	0.576473125197233	-4.80260511864
P49419-2	ALDH7A1	-0.150615606701524	3.32267060589845	-2.52072977044914	0.0570991654445449	0.579167513245112	-4.8026675547717
P51513-1	NOVA1	0.111291860051387	3.33279406800927	2.07916999483116	0.0967657940411662	0.600401339037267	-4.80299334877336
O75570	MTRF1	-0.133854227546472	3.27646832868235	-1.70067535429445	0.15455276362037	0.629888102837026	-4.80306893617233
Q68D20	PMS2CL	0.100057055221482	3.29400303458288	0.212312502825033	0.840909503642443	0.93814529207219	-4.80316379183897
P22466	GAL	-0.277118575547464	3.33435888998651	-1.07079222886161	0.336987990482908	0.72325743786445	-4.8034211857479
Q9BT30	ALKBH7	-0.204670954232973	3.31168799001431	-1.31047666055082	0.251398127787495	0.672532554117653	-4.80520615765998
Q969Y0	NXPE3	0.236984108826136	3.26636837528791	0.976178394134406	0.377281883097163	0.739659754808278	-4.80676927251726
Q9UNA4	POLI	0.120777174205015	3.32563328447784	1.83148091300877	0.131317914206058	0.61592197485254	-4.80692269182456
Q96KA5-1	CLPTM1L	0.142957153690326	3.34936772625397	1.93070366958591	0.116128993704396	0.613199272208859	-4.80695829819182
Q8IYK4	COLGALT2; GLT25D2	0.180537778315637	3.34817032523453	1.38723635496267	0.228561233977022	0.657902778464246	-4.80724026063279
Q5VWW1-1	C1QL3	-0.174895596746498	3.29229861072137	-1.59517503531208	0.176325227775951	0.639221410600478	-4.80824765893517
Q8N6T7-1	SIRT6	-0.127304268596476	3.31556760124569	-1.91664504393038	0.118164090059172	0.613199272208859	-4.80863097179001
P00813	ADA	0.295067022474886	3.28276866355543	1.1041738736222	0.323683785218142	0.711334908982369	-4.81056948248195
Q9Y255	PRELID1	-0.187507476106616	3.28451374974878	-1.47061709817436	0.206010304689781	0.649256489406383	-4.81153178313739
Q8N9I9-2	DTX3	-0.177277398930762	3.33705054542137	-1.66220599544986	0.16215782667372	0.632323590694833	-4.81165878773246
O60266	ADCY3	0.240015886726021	3.40954385697856	0.830418821579298	0.447076865931996	0.768470934698669	-4.81261727618853
Q9NRG9-1	AAAS	0.125762825272429	3.32963580007542	2.10639893299182	0.0936040396676983	0.600401339037267	-4.81268832295889
Q562E7-1	WDR81	0.110738754380848	3.31356480505044	2.22034032142543	0.0815290293452269	0.597945326025167	-4.81293141638384
Q96QD5-1	DEPDC7	-0.199755438263814	3.30023280093709	-1.2178495220215	0.281803288642818	0.687854673358035	-4.81336375934139
Q9UHA4	LAMTOR3	-0.285117128840891	3.42719502036096	-1.3930324754906	0.226919532588878	0.65775315876855	-4.81368110894437
Q92918	MAP4K1	0.250909810384461	3.28281009055403	0.715042531356811	0.509072145225692	0.799287505963891	-4.81385202989431
O15514	POLR2D	0.171264893599975	3.36762234462636	1.80330802561474	0.135997892938944	0.619835120579024	-4.81389318401166
Q99569	PKP4	0.137748679318167	3.31860041755116	2.07512786969241	0.0972448187978119	0.600401339037267	-4.81392464474276
O00750	PIK3C2B	0.0993269567527761	3.31188085946307	2.20045946461813	0.0835085233084733	0.597945326025167	-4.8141172287987
Q9Y3Q3	TMED3	0.134823155525268	3.34612914883204	1.74844068731566	0.145613693532711	0.627138273705989	-4.81458939214504
O75251	NDUFS7	-0.175000608689971	3.25985635177337	-1.77453110157767	0.140956707553508	0.623339860785287	-4.8154509439813
O14525-1	ASTN1	0.255134182797919	3.30610086726969	0.840892260143902	0.44174453404861	0.767695758784181	-4.81602069764585
Q13137-4	CALCOCO2	-0.170021104234331	3.29641636462276	-2.17714000157912	0.085896897740231	0.597945326025167	-4.81616666452803
Q9ULT0-4	TTC7A	0.201223686494596	3.35344468435018	1.31279153916545	0.250678946795485	0.67222544106081	-4.81642748723477
Q9BSW2-2	EFCAB4B; CRACR2A	-0.0382041878054283	3.39329823572053	-0.0828955189941554	0.937405182520501	0.979101566406578	-4.81674083861457
Q92536	SLC7A6	0.177620881966938	3.31050634815788	1.34858834198003	0.239801582364672	0.663535940296454	-4.81678961421414
Q96HQ2-1	CDKN2AIPNL	0.171116577314125	3.43404122852114	1.45356204687123	0.210440047967864	0.6500755924844	-4.81729334632667
Q9BVC4	MLST8	-0.340295691541753	3.34226400662257	-1.83866028187117	0.130152248118372	0.61592197485254	-4.81741493379863
Q6PID6	TTC33	-0.160917682467779	3.33567528263393	-1.57034599912753	0.18188277190046	0.642485434296894	-4.81841722216253
Q6P1N9-1	TATDN1	-0.286477262590842	3.36194095624838	-2.06045580050646	0.0990049887566263	0.600401339037267	-4.81865774892276
O76071	CIAO1	-0.13743570520453	3.33285899855976	-2.00429974682486	0.106062183530012	0.608070400210579	-4.81902971825849
O43309	ZSCAN12	-0.0971966721063112	3.29955519431985	-0.221450435617306	0.834193734110592	0.93588063430939	-4.81962721695324
P83369	LSM11	-0.236535195184296	3.30749910267353	-0.747503215986214	0.491029428526358	0.790655073632552	-4.82102079650832
Q9Y2A7-2	NCKAP1	0.0907042240280608	3.3202916323027	2.60811332362447	0.0516031796401773	0.576473125197233	-4.82153603658393
Q8IX15-3	HOMEZ	0.147798360097107	3.3195425547443	1.56260635421737	0.183650624245411	0.642485434296894	-4.8217254750591
Q969E2-1	SCAMP4	0.165223594980925	3.30772348607981	1.66530430222755	0.161531490427509	0.631282936804369	-4.82254854591201
Q9UH99	SUN2	0.269193418966924	3.33280262218841	2.11051311271171	0.0931360208436492	0.600401339037267	-4.82264181908692
Q8TCA0-1	LRRC20	-0.497931384081974	3.38395232011881	-1.79378462293908	0.137618687372014	0.62197076402545	-4.82501974319169
P15259	PGAM2	-0.218491813104758	3.28794459445187	-1.63485956992225	0.167793675035282	0.639091196746938	-4.82513189509641
Q8WUA8	TSKU	-0.22026833087284	3.29716862767832	-0.685061080226893	0.526149563183331	0.808747976651549	-4.82563112587473
Q9Y242	TCF19	-0.239123404033532	3.32547925219875	-0.919531683178468	0.403279976069934	0.753275343464164	-4.82580504918836
Q9BY67-3	CADM1	0.139736224482851	3.35552946977321	1.87725943559197	0.12406726029447	0.61592197485254	-4.82866827182728
Q9BRU9	UTP23	-0.16961365440547	3.27375701888087	-1.89217660494738	0.121795904999896	0.61592197485254	-4.82928186625952
Q16864-2	ATP6V1F	-0.614140428025026	3.34175198112999	-1.86278781012867	0.126313119520206	0.61592197485254	-4.82974534118501
Q9H4Z2	ZNF335	0.162380154693329	3.31999363884317	1.49304834867396	0.200322659270389	0.645867981426319	-4.83065548674241
Q96EY4	TMA16	-0.17607331997269	3.29479697481897	-1.87152619231525	0.124951975256822	0.61592197485254	-4.83080413340662
Q8NCN4	RNF169	0.110658386709763	3.32928119731864	2.10939496853444	0.0932629691866563	0.600401339037267	-4.83109259245906
Q3ZCW2	LGALSL	-0.435781260187877	3.40081510260843	-1.61402605302241	0.172219530839653	0.639221410600478	-4.83172442830285
Q9Y3P4	RHBDD3	0.245186168555037	3.3335600970299	1.02872669753864	0.354425591970632	0.730025501572735	-4.83215556423375
Q9BXF3-1	CECR2	0.1113752793496	3.35298457580904	2.10985285027838	0.0932109612137819	0.600401339037267	-4.83362262124841
P04899-1	GNAI2	0.147171577440843	3.31959269934239	1.7312703765489	0.148764473918416	0.629888102837026	-4.83383991411236
Q6UWL2-2	SUSD1	0.235615991291444	3.30755994548775	1.04097620664293	0.349269606825366	0.726927048690081	-4.83485970080658
O95922	TTLL1	0.168791799710627	3.32164063367086	1.37432516115835	0.23225919525856	0.661910098314009	-4.8352344989223
Q9NQR4	NIT2	-0.222910907219038	3.32753546106883	-2.15039742282582	0.0887270031840058	0.600401339037267	-4.83602370207907
Q8WTV1	THAP3	-0.234976951519098	3.26094642302813	-0.858009537459465	0.433135784988075	0.764431782074966	-4.83617439533334
O00170	AIP	-0.137731243898316	3.31981218201988	-2.07973699995588	0.0966988014125929	0.600401339037267	-4.83639696112924
O00408-1	PDE2A	0.218541892836196	3.31880990319441	0.711102652896212	0.51129377032721	0.799899145237031	-4.83662987258898
Q96K37-1	SLC35E1	0.20970812490628	3.29727843400764	1.69285219003279	0.156069396900663	0.629888102837026	-4.83674426101561
Q8WUY9	DEPDC1B	0.103537683376391	3.33117165156243	1.9511028046426	0.113241415262306	0.611287479788836	-4.83733501691053
O95197	RTN3	0.132220412829932	3.33485676594158	2.345278375553	0.0701991998754977	0.588121135841356	-4.83785263824889
Q15628	TRADD	-0.280715572536201	3.33192938360639	-1.15809879104266	0.303167821024949	0.701222795800215	-4.83868246623187
A6NMZ7-1	COL6A6	0.132346132049027	3.33847272469948	1.82176374482427	0.132912927444078	0.616905436065609	-4.83952679124594
Q9H040-1	SPRTN	-0.132837791253345	3.28368281951185	-1.73365822524167	0.148322148836543	0.629888102837026	-4.83968123714021
Q69YL0	LOC152217; NCBP2-AS2	-0.205445624900607	3.26494066937769	-1.25256641902595	0.270029402201806	0.681697485388932	-4.84069081193629
P25787	PSMA2	-0.424391862570242	3.33237231020193	-2.20119839855595	0.0834340253296349	0.597945326025167	-4.84080914629855
P16219	ACADS	-0.106489555365986	3.27377576011618	-1.90682488453575	0.119607841541423	0.61592197485254	-4.84112465034022
O60942-1	RNGTT	-0.175477827147876	3.31920682253754	-2.15300156713041	0.088447044028072	0.600401339037267	-4.84121973423601
Q7Z7K6-3	CENPV	0.130442367991434	3.37042818662923	2.16790935069486	0.0868625952622286	0.597945326025167	-4.84135141418851
Q8TE02-4	ELP5	-0.501338842225512	3.36567030484277	-1.32703656725164	0.246295758992123	0.669729302008042	-4.8414783145815
Q96HY6-1	DDRGK1	0.167127732483846	3.34318097423299	1.50146900212354	0.198227510227146	0.645214375174956	-4.84172698162848
Q969I6	SLC38A4	0.184443963118878	3.20104363734461	1.36646095331881	0.234539560068552	0.661910098314009	-4.84221703698812
Q9UI36-1	DACH1	0.122955781289273	3.26608897780982	2.11124342857	0.0930532046446497	0.600401339037267	-4.84282515463272
Q8WZ82	OVCA2	-0.321570903438197	3.32851514150306	-1.63012678203298	0.168788946228778	0.639091196746938	-4.84326188663331
Q58EX7	PLEKHG4	0.178177964001121	3.32058968322263	1.34460621645137	0.240989172021319	0.664973762982363	-4.84326199758276
Q9UHC7	MKRN1	0.141215386409446	3.34606169222646	1.68894725292595	0.156832086904947	0.629888102837026	-4.8443467146876
Q3KRA9-2	ALKBH6	-0.162286067341498	3.32393090682694	-1.45659160319923	0.209646453716553	0.6500755924844	-4.84497555822696
P50876	RNF144A	-0.216397240789769	3.30022371686077	-0.804161341198821	0.460662074404365	0.774445105971856	-4.84645737549537
P17931	LGALS3	-0.24619929978855	3.30716785864271	-1.00229771982572	0.365770734777729	0.735773372175399	-4.84707111515271
Q9P2C4	TMEM181	0.133988904284912	3.32601219341034	1.77904074146309	0.140167441647188	0.622720080031207	-4.84710721834863
O14576-1	DYNC1I1	0.160143142765361	3.33008532209534	1.46001643735249	0.208752824774747	0.6500755924844	-4.84729863150707
Q9Y5J9	TIMM8B	0.177710175636795	3.35739475787227	1.56794347478248	0.182429723356042	0.642485434296894	-4.8476983278726
Q6IPM2-1	IQCE	0.153674765360514	3.33064242017282	1.4768645691507	0.204410515192045	0.64872967422434	-4.84774656663879
P02794	FTH1	0.208815917462094	3.31297971807948	1.99805461631303	0.10687944535406	0.610237709911946	-4.84798822904932
Q01167	FOXK2	0.0921250952528144	3.34510383737315	2.31129877150895	0.073100119896735	0.589852885511626	-4.84824889109162
Q07666	KHDRBS1	0.121873023633609	3.34768584522377	2.50391411827032	0.0582296693864823	0.579893610416486	-4.84827496464223
Q9NQZ5	STARD7	-0.118012891882655	3.30629814075739	-1.92715031763641	0.116639863880337	0.613199272208859	-4.84846887562624
Q17RN3-1	FAM98C	-0.185532669399655	3.28865283342446	-1.37455692589192	0.232192313050571	0.661910098314009	-4.84978866778644
P09958	FURIN	0.214761743551091	3.3420027309003	0.918478855767651	0.403776658466071	0.753275343464164	-4.85003223393446
Q9BVM2	DPCD	-0.110914410512877	3.2839127167995	-1.86291467778091	0.126293247499158	0.61592197485254	-4.85019342812247
Q9UBN1	CACNG4	0.203063321661158	3.34124499568017	1.1301366551031	0.313657318236591	0.705203040299361	-4.8501972183359
Q96NL0-4	RUNDC3B	-0.144729501173593	3.31855670659735	-1.60865648014366	0.173379142237365	0.639221410600478	-4.85031657482553
Q9BXP2-1	SLC12A9	0.171131816962756	3.34479560617457	1.3858637217553	0.228951684201616	0.657973286882868	-4.85076907223147
P19440	GGT1	0.171493507090108	3.33022850785578	1.39504246288195	0.226352866362546	0.65775315876855	-4.85166527291136
Q9UL03	INTS6	-0.084980273331378	3.32860805951333	-2.28006992887231	0.0758819423845972	0.589852885511626	-4.85237498860696
Q9Y2B0	CNPY2	0.137082712862834	3.33006186534245	2.02973984964329	0.102800944484888	0.603321417480837	-4.85244751242646
Q8TF68-1	ZNF384	0.152508386503855	3.30939308376729	1.71722357401247	0.151393979099984	0.629888102837026	-4.85361457079785
Q96S82	UBL7	-0.359207106132706	3.3638725452609	-1.71943501513902	0.150976874088184	0.629888102837026	-4.85364951345791
P20839-6	IMPDH1	-0.132739249060316	3.33884797547984	-2.09379040575042	0.0950541294007298	0.600401339037267	-4.85376019308059
Q9NSE4	IARS2	-0.129654663046787	3.26240771026802	-2.50668183401627	0.0580419056159373	0.579893610416486	-4.8539818290614
Q01581	HMGCS1	-0.206047219692941	3.33871482957324	-2.4969327471587	0.0587062848027762	0.579893610416486	-4.85577551262861
Q8IXM2-3	C17orf49	0.129328501374721	3.33112502943086	1.75738746432576	0.143999172090963	0.626303905597185	-4.85611559899214
Q16854	DGUOK	-0.154941069389145	3.24469527399463	-1.59444041415752	0.176487197098535	0.639221410600478	-4.85644433133313
Q9H2X6-1	HIPK2	0.201384806050653	3.32175852348198	1.05012690126794	0.345459981229839	0.725507933663001	-4.85711613942669
Q9NX14-2	NDUFB11	-0.165912506681802	3.28054877786063	-1.91853560632725	0.117888248353626	0.613199272208859	-4.85804072370853
P15622-1	ZNF250	0.16110486974928	3.3293599699712	1.46108083383801	0.20847585245251	0.6500755924844	-4.85821562054957
Q6NT76-5	HMBOX1	0.215483948725535	3.38447590245135	1.68572844061244	0.157463617624524	0.629888102837026	-4.8589666216502
Q86XR7-2	TMED7-TICAM2; TICAM2	0.100811151380374	3.32745085504516	2.06157804105484	0.0988691617835783	0.600401339037267	-4.86002982427628
P10644	PRKAR1A	-0.115157788256576	3.33212270380418	-2.10781090110642	0.0934431339639656	0.600401339037267	-4.86030189595775
Q14108-1	SCARB2	0.0932020021224946	3.35948806101916	2.21189818088494	0.0823633169223751	0.597945326025167	-4.86123043703894
O75037	KIF21B	0.225447565226348	3.36553749463314	0.793763124916779	0.466127550785776	0.77667534446276	-4.86136153703691
P52594-4	AGFG1	0.106386892342674	3.32116276664153	2.12352305447421	0.0916724973535344	0.600401339037267	-4.8616995027938
O14908-1	GIPC1	-0.223755022832863	3.34458457924068	-1.84785325741036	0.128675341264258	0.61592197485254	-4.86241039886772
P56159-2	GFRA1	0.170542952361732	3.35021735978783	1.5969403417733	0.175936621126393	0.639221410600478	-4.86268618202434
P60604	UBE2G2	-0.831922388965701	3.4089397012412	-1.50149308636768	0.198221548792468	0.645214375174956	-4.86282992550699
O15511-1	ARPC5	-0.0890733709480419	3.31590979354076	-2.28598962633349	0.0753458818859412	0.589852885511626	-4.862875638255
P52848-1	NDST1	0.141289919078519	3.31579579609259	2.06149861763033	0.0988787680110187	0.600401339037267	-4.86304234702565
Q96HW7	INTS4	0.0904950936462298	3.33148805743338	2.35311852320065	0.0695479047160363	0.587341417615064	-4.86381689742527
Q9BU02-1	THTPA	-0.208189771562246	3.3171555749927	-1.67536765076063	0.159514010677211	0.629888102837026	-4.86446440714039
Q92574-1	TSC1	0.0894185692901602	3.31463330967356	2.18001895338106	0.0855980820276756	0.597945326025167	-4.8645564848243
Q5JR12	PPM1J	0.223904317268285	3.26932613593334	0.990345069426058	0.371001386641799	0.737294593487698	-4.86472832183745
Q9HAU0-6	PLEKHA5	0.113747576292847	3.31614009839865	2.28965691084693	0.0750158606924131	0.589852885511626	-4.86559292994604
Q9H0X9	OSBPL5	0.134700603415852	3.30517650515593	1.6863705285481	0.157337433832544	0.629888102837026	-4.86579854640625
Q9Y6X8	ZHX2	0.134808344801542	3.34406063292003	1.87763938999974	0.124008860125686	0.61592197485254	-4.86677789962587
Q5SWA1	PPP1R15B	-0.202456068717675	3.34874295166412	-1.12223101692565	0.316680902826759	0.706050430312187	-4.86680182832299
Q12768	KIAA0196; WASHC5	0.084814697613347	3.31351748282775	2.29114648193552	0.0748822635704352	0.589852885511626	-4.86680869515521
Q9UGJ1	TUBGCP4	0.143552297139985	3.31831621369349	2.11889096301802	0.0921907229937825	0.600401339037267	-4.86726439156452
Q9NY93	DDX56	-0.170055740613345	3.27356937780463	-2.18085703979775	0.0855113054480746	0.597945326025167	-4.86807733317791
A8K8P3	SFI1	0.16894638383361	3.34814046993717	1.36053240254232	0.236272739015766	0.661910098314009	-4.87122267898275
Q5VTE6-1	ANGEL2	-0.175055279042466	3.33370991783045	-1.70594166527742	0.153540280332241	0.629888102837026	-4.87156532293735
P49590	HARS2	-0.127974994448809	3.25144260736935	-1.95918558331983	0.112118295509689	0.611287479788836	-4.87168980207369
Q92636	NSMAF	0.111725512276871	3.3114577790452	1.97591919882291	0.109830347364671	0.61045378725435	-4.87221846226246
O75864-1	PPP1R37	0.135036242799319	3.33383363662411	1.75429127201425	0.144555814187189	0.626960076516342	-4.87366741655485
Q9NRY6	PLSCR3	0.187438058248677	3.36351237212305	1.19494858495688	0.289825048313509	0.694247586994658	-4.87393651278721
Q9P2J2	IGSF9	0.202799661341207	3.34199682237355	0.764047756552929	0.482013581237152	0.785085035793845	-4.87526538193971
Q8NDZ2-1	SIMC1	0.118473518901703	3.31148156161761	1.73797349306368	0.147526203907498	0.629686859074709	-4.87700350745667
Q86XJ1	GAS2L3	-0.0704752692415972	3.33945082839369	-0.180399313013374	0.864482720295573	0.947954439562402	-4.87753485264517
P42345	MTOR	0.0909061173055592	3.31566247970246	2.55851998161314	0.0546463066082322	0.579167513245112	-4.87774045846183
Q5TBA9	FRY	0.159201725219223	3.36200531004205	0.449310109981081	0.673495658235672	0.877940040110104	-4.87798893514592
Q9BYN0	SRXN1	-0.314375920044004	3.36761862256368	-1.35964087272749	0.236534425127223	0.661910098314009	-4.87830520114682
Q96JH8	RADIL	0.120615108866136	3.33437584102147	1.89441750484759	0.121458474440646	0.61592197485254	-4.87922512550276
Q9NRA2	SLC17A5	0.227401226795908	3.42085120437131	1.25407764419074	0.269527323250687	0.681048731924137	-4.87962515140358
O75718	CRTAP	0.107007469613417	3.35095072342517	1.9172588910394	0.118074452688022	0.613199272208859	-4.88069370933212
Q9H0U9	TSPYL1	-0.157828979819183	3.31501831130681	-1.56472435981967	0.183165146269692	0.642485434296894	-4.88137456187679
O43660-1	PLRG1	0.0859034973860917	3.33039430585173	2.43587044939164	0.0630637398529353	0.585213598468076	-4.881596519453
Q9UJT1	TUBD1	-0.144548079949882	3.29366326793185	-1.54043000142319	0.188811194806502	0.643073646454692	-4.88219295462584
Q6P444	FAM54A; MTFR2	-0.142414215624662	3.29731158306026	-1.57028199021579	0.181897322769333	0.642485434296894	-4.88349757480586
Q9NWU1-1	OXSM	-0.142051028090487	3.31075935637526	-1.78215765494224	0.139624592505639	0.622442137443715	-4.88489063819951
O95613	PCNT	0.100979191156264	3.32104718628051	2.5627878512393	0.0543767232819077	0.578907235348637	-4.88683289469835
Q16394	EXT1	0.197972540541813	3.33729319696898	1.17767261269076	0.296013028591568	0.698037479805827	-4.88691201411201
A6NNL5	C15orf61	-0.201193696930107	3.24070973155707	-1.06114279348579	0.340921286206451	0.724041730896042	-4.88737057994289
Q96GZ6	SLC41A3	0.198202696637059	3.4313793847313	0.64609641028907	0.548928332467969	0.820887655229549	-4.88772700281225
Q8WVL7	ANKRD49	-0.209929960875383	3.31656966706726	-1.04956127209303	0.345694425476952	0.725507933663001	-4.88817778407918
Q8WVQ1	CANT1	0.119686946024306	3.32625131370473	1.93169601977577	0.115986743152024	0.613199272208859	-4.88832953894191
Q08495-1	DMTN; EPB49	0.180200416364554	3.21233688934844	0.514307081979349	0.630678354651273	0.859926670173628	-4.88857129247554
O60637	TSPAN3	0.194571189557062	3.27205130427782	1.29899807916777	0.254992957819207	0.673893364986999	-4.88881645248221
P52746	ZNF142	-0.137054438686577	3.29345269062327	-1.7326397878104	0.148510639175993	0.629888102837026	-4.88937462580251
Q08380	LGALS3BP	0.140842528076741	3.35008692586356	1.73111053334914	0.148794131481103	0.629888102837026	-4.88944107995139
Q8TB37-1	NUBPL	-0.161591108106602	3.28825272593859	-1.88804764026504	0.12242021038256	0.61592197485254	-4.88967163580642
Q96AZ6-1	ISG20	-0.209172775623807	3.33421314986168	-1.50473598391876	0.197420460699557	0.645214375174956	-4.88996267859738
Q86V85	GPR180	0.19157895518291	3.35838567549286	1.30968715994342	0.251643850821849	0.672532554117653	-4.89031600944481
Q2TAZ0-3	ATG2A	0.131116987862013	3.318530835156	1.66910001444478	0.160767511367632	0.630365933565652	-4.89049132541366
P98196	ATP11A	0.13042762355089	3.31788143302491	2.01592626432209	0.104558310990521	0.607276496539471	-4.89103803772171
Q15363	TMED2	0.121411527211286	3.30793823097307	2.10215223136061	0.094089780722347	0.600401339037267	-4.89107237581788
Q9UDT6-1	CLIP2	0.108962342873957	3.31445736031822	2.09468413639842	0.0949505539429744	0.600401339037267	-4.89216160085704
Q9GZM5	YIPF3	0.121181073883243	3.29317968090934	1.71573512448337	0.151675381948798	0.629888102837026	-4.89220896837972
Q3SXY8	ARL13B	0.16876375796814	3.29610768720781	1.56015786984368	0.184213448622058	0.642485434296894	-4.89280228466381
P13987	CD59	0.131964359591465	3.36005427795436	1.64371484329787	0.165947342871858	0.636602416097472	-4.89289352541059
Q9BSA4-1	TTYH2	0.187686848039545	3.33218511496978	1.18821715420393	0.292222085432508	0.696677615104442	-4.89465746756947
Q8NBN3-1	TMEM87A	0.107431374153828	3.35678373963486	2.11931885182418	0.0921427203230138	0.600401339037267	-4.89498745167926
O75564	JRK	-0.145608598948344	3.33976286304055	-1.77728723386442	0.140473793258234	0.622720080031207	-4.89595551544003
Q5UIP0	RIF1	0.165393019802114	3.31929687938665	2.79657993252055	0.0416489685609073	0.574766769410442	-4.896178206338
Q6PUV4	CPLX2	0.162004259381465	3.39917807194368	1.39432757394126	0.226554255844137	0.65775315876855	-4.89642466545923
P31431-1	SDC4	0.213590416133634	3.33208679734712	1.16309138801213	0.301328275970591	0.699296355370502	-4.89646705550027
Q92794	KAT6A	0.106078259463977	3.30967954440171	2.32923533338706	0.0715528335618703	0.589852885511626	-4.89655622544883
Q9BQ24-2	ZFYVE21	0.166750584639273	3.31333327480114	1.37232155485503	0.232838159367383	0.661910098314009	-4.89741440787858
Q9BTZ2	DHRS4	-0.115094242759	3.2951250671973	-1.75100129489027	0.145149719408259	0.627138273705989	-4.8974621520399
Q9H9F9	ACTR5	-0.183869380214728	3.32216179535664	-1.82235532235521	0.132815251029316	0.616905436065609	-4.89757910999907
P04233-1	CD74	0.204899547360021	3.38578800874441	1.06176423182623	0.340666785176537	0.724041730896042	-4.89759374999884
Q8IVQ6	ZDHHC21	0.193994432447537	3.28901571467474	1.25785031922468	0.268277679267577	0.679952184364404	-4.89768904812236
Q9C0A0-1	CNTNAP4	0.119766189827145	3.34228538541468	1.7194835191893	0.150967738804218	0.629888102837026	-4.89866696628303
Q8TEZ7	PAQR8	-0.11260167889875	3.38081146107424	-0.312244019307309	0.768451752607431	0.911976347423649	-4.8991896216844
Q9BZF2	OSBPL7	0.169249672576857	3.32012393931347	0.545410313400269	0.61075276297742	0.852213729172811	-4.89981071894283
Q9Y535	POLR3H	-0.135731391937935	3.31650086223955	-1.60967683434155	0.17315818516874	0.639221410600478	-4.90004188967333
Q9BQ67	GRWD1	-0.221296860678779	3.34546182962444	-2.0631337258689	0.0986812031954981	0.600401339037267	-4.90073175389167
Q9Y5K6	CD2AP	0.0997273476071481	3.32538818285648	2.1786904145574	0.085735835641279	0.597945326025167	-4.90091456219055
Q8ND83-1	SLAIN1	0.159778271870524	3.37052886587344	1.54399114806452	0.187972899254297	0.642891375556706	-4.90184560130508
Q8WUF5	PPP1R13L	0.149973345704269	3.41123030274674	0.358746506915652	0.735591257814753	0.900109688991523	-4.90221295069771
Q9Y375	NDUFAF1	-0.147366492188972	3.25406705212251	-2.01210936168799	0.105049509118272	0.607276496539471	-4.90260257499792
Q12986	NFX1	0.106628093375515	3.30682829874933	2.19837060170458	0.0837195082496808	0.597945326025167	-4.90369639883317
Q9Y2G5	POFUT2	0.101977093862543	3.33017379603186	1.93661474372266	0.115284360864669	0.613199272208859	-4.90371792847114
Q9BUK6	MSTO1	-0.426472782022009	3.3451464354892	-1.840434636822	0.129865819610456	0.61592197485254	-4.90429195908899
Q9UG01	IFT172	0.0782705168924084	3.32218044515855	2.30789011430552	0.0733982787945327	0.589852885511626	-4.90466075525294
P10075	GLI4	0.182510995090826	3.28958260324216	1.14190117572938	0.309205290605541	0.704822341396715	-4.90575095674886
Q14028	CNGB1	-0.193099231104164	3.30525263315119	-1.09621858317887	0.326811965471578	0.713340622976458	-4.90577188605041
Q8IZD9	DOCK3	0.156899781723587	3.3026334070517	1.33742326989058	0.243145447064923	0.666962289589095	-4.90577399060234
Q02338	BDH1	-0.180641224174425	3.27819155308066	-1.43639058834454	0.214993596741318	0.653616529153469	-4.90679382039851
Q3KQV9	UAP1L1	-0.276626285258139	3.34239428915892	-2.02805068734765	0.103014143815681	0.603321417480837	-4.90698354057387
P53675	CLTCL1	0.15131487034839	3.34256643377471	1.37822466509744	0.231136330355302	0.660751868944375	-4.90708634440005
Q15329	E2F5	0.149819870820324	3.31317982775114	1.48298920732675	0.202853974684704	0.647731786830976	-4.90794150290756
Q8NCW6	GALNT11	0.15133132218751	3.32283608969532	1.54604370675541	0.187491403351223	0.642891375556706	-4.90811201621151
A6NI28	ARHGAP42	0.166970135157633	3.29983359994771	1.38198620398834	0.230058110612342	0.658799178998449	-4.90848414409839
Q92621	NUP205	0.137834545397947	3.32458962834054	2.60064272319258	0.0520492742857782	0.576473125197233	-4.90880413170644
O15234	CASC3	-0.115208308083178	3.30835241098719	-1.93734210352429	0.115180876277315	0.613199272208859	-4.90894259351161
Q13325	IFIT5	-0.0971625086139403	3.29570401450956	-1.97902118711078	0.109411671061241	0.61045378725435	-4.90895251564378
Q9Y333	LSM2	-0.309525140826216	3.37254460490703	-1.64567114449445	0.165542225791648	0.636602416097472	-4.90902193477033
P78509	RELN	0.147598234661081	3.29188161318824	1.69410519680149	0.155825467724954	0.629888102837026	-4.90902683152468
Q96S16-1	JMJD8	0.165867884316418	3.33250256764675	1.24248120288309	0.273402207709914	0.682960491309644	-4.90943692498848
Q01650	SLC7A5	0.118776809737021	3.34309672202853	1.76802722276253	0.142103076174962	0.625016791688795	-4.90945177935034
Q9HB90	RRAGC	0.115433573931656	3.32511978593849	1.8615577652672	0.12650595786985	0.61592197485254	-4.90991151591139
Q96CX3-1	ZNF501	-0.175617635084128	3.36657395265728	-1.17140341224522	0.298287892997679	0.698037479805827	-4.91094929236094
Q6UXT9	ABHD15	-0.176499429260411	3.32148145532018	-1.13637596460946	0.311289141604747	0.705203040299361	-4.91139478723909
Q86YS3	RAB11FIP4	-0.144648387235453	3.23600543060526	-1.65254806922134	0.164126044023749	0.635176224633546	-4.91170268940916
Q3SXZ3-1	ZNF718	-0.192505674599344	3.28339337984997	-0.911892306251545	0.40689515523832	0.754253505462895	-4.91180263934296
Q92624	APPBP2	0.110106357587781	3.32976050477112	1.869868762094	0.125208964913664	0.61592197485254	-4.91248830994617
Q6NW40	RGMB	-0.191223284660746	3.33798188741025	-1.20469931449914	0.286384483976818	0.690570164428914	-4.91251116205174
Q6ZRS2	SRCAP	0.14338062459541	3.31560458841586	2.35128879673784	0.0696993091347815	0.587341417615064	-4.91309159403008
Q9BX67	JAM3	0.136360858158706	3.33877247357252	1.56750137649358	0.182530548468944	0.642485434296894	-4.91333320997559
Q9HD45	TM9SF3	0.151921301840234	3.31536270721189	2.28960808669018	0.0750202440448042	0.589852885511626	-4.91333599912492
Q8N8E3	CEP112	0.117423023096671	3.336019398346	1.90700074695881	0.119581824203602	0.61592197485254	-4.91402028904397
Q9GZP9	DERL2	0.162789545347753	3.34261682340252	1.36006560701165	0.236409720704055	0.661910098314009	-4.91587262164076
Q86WT1	TTC30A	0.175916942190478	3.27307101176654	1.13106729535357	0.31330307496255	0.705203040299361	-4.91589885099926
Q8WY91	THAP4	-0.118347302340978	3.2754063525509	-1.76812626613319	0.142085547040389	0.625016791688795	-4.91622608299637
Q14849-1	STARD3	0.173623115415444	3.36221092692237	1.21778885195904	0.281824270077212	0.687854673358035	-4.91646660273821
Q9BUV8-5	C20orf24	0.134182953070943	3.3506051362854	1.81511260517524	0.13401625203199	0.617798459088304	-4.91733848537563
P27815-1	PDE4A	0.152649996078849	3.30412732279428	1.60495522903785	0.174183023003028	0.639221410600478	-4.91744419925147
Q8WZ73-1	RFFL	0.187416832919681	3.32362828636421	1.00853506531057	0.363065913018157	0.733384863658184	-4.91747868269563
Q9H2G9-1	BLZF1	-0.185533925803069	3.29764822736578	-1.13261268296388	0.312715615583049	0.705203040299361	-4.91751242220099
Q9H6A9-1	PCNXL3; PCNX3	0.159985768970925	3.30290534664287	1.34941184021194	0.239556684031418	0.663535940296454	-4.91785042321743
Q13003	GRIK3	0.205138651571854	3.31355053368322	1.3474834788381	0.240130528312592	0.663923079274882	-4.91787069507335
Q9UGL1-1	KDM5B	-0.112307977407167	3.35696072183747	-1.80715391197205	0.135348969946621	0.619107450141729	-4.91793695653879
Q92530	PSMF1	-0.202649386799888	3.38250628076848	-1.80673552326542	0.135419409699484	0.619107450141729	-4.91877000785501
Q03060-31	CREM	0.144248463876646	3.33389617407701	0.459449086007175	0.666715328844391	0.876200375413345	-4.91922984609577
O95199-2	RCBTB2	0.127197351725445	3.32230374607387	1.64490473589543	0.165700816985134	0.636602416097472	-4.91928980927869
Q9BRB3-1	PIGQ	0.163663788439115	3.33954812020501	1.29078636981666	0.25759415225377	0.677596987436865	-4.91992814139226
Q9NZD2	GLTP	0.120739637267744	3.32310664198527	1.6980020891034	0.155069318555118	0.629888102837026	-4.9201105543011
Q13277-1	STX3	0.15104211661784	3.32174328359184	1.35719688773127	0.237253209971533	0.662242260903282	-4.92044493603639
Q9H336	CRISPLD1	-0.149438694992921	3.25704764168123	-1.49670213195068	0.199410901167274	0.645214375174956	-4.92105748758493
Q96EK9	KTI12	-0.192311476695874	3.32599961162049	-1.99246509181584	0.107616576880902	0.61045378725435	-4.92232818839772
Q8TAP8	PPP1R35	0.189380650038148	3.34313450815347	0.92935763086456	0.398668296785128	0.751220433169796	-4.92280454206965
P56962	STX17	0.125658587847952	3.3245354748917	1.61237042153617	0.172576247667561	0.639221410600478	-4.92347990267489
Q92569	PIK3R3	-0.198922094064548	3.35513069366713	-0.928267182395784	0.399177963644231	0.751502017950718	-4.92639029421613
Q16585	SGCB	0.186269576436589	3.35031557987478	0.925382495174887	0.400528795277851	0.751983792215352	-4.9267177599248
P84095	RHOG	-0.164253502382872	3.32889886161196	-1.85254194278855	0.127928805531504	0.61592197485254	-4.92673348666455
O96005-1	CLPTM1	0.120278399439484	3.33009966801451	2.00632841027504	0.105798133797217	0.608070400210579	-4.92683214492873
O94953	KDM4B	0.111734808621821	3.30438164638529	1.85191029124651	0.128029113973324	0.61592197485254	-4.92694910329627
Q9P2X0-2	DPM3	0.159307680169716	3.373056184688	1.45645043349138	0.209683368420043	0.6500755924844	-4.92744339970942
Q8N1W1-6	ARHGEF28	0.101359473808448	3.30652656101813	2.40069263871344	0.065735195701464	0.585213598468076	-4.927465530728
P28472-1	GABRB3	0.15989675843937	3.32435276984108	1.54541928744905	0.187637752073158	0.642891375556706	-4.9277547151523
P42167	TMPO	0.260575030677279	3.32204730209574	2.11931286897449	0.0921433913234549	0.600401339037267	-4.92811490067427
Q96AA3	RFT1	0.218424202317248	3.2854698041839	1.09852575833584	0.325902019960703	0.713340622976458	-4.92848077457604
Q9H6U8-3	ALG9	0.165755379850175	3.3180036937002	1.60747576821283	0.173635177855862	0.639221410600478	-4.92889183745175
Q9NRA0-5	SPHK2	0.186455722028613	3.34800967254783	0.86095727582105	0.431666576698959	0.764431782074966	-4.92948297299771
O75934	BCAS2	-0.105194164614197	3.33399698830565	-2.10927849948883	0.0932762031560117	0.600401339037267	-4.92996927826172
Q9NRZ7-3	AGPAT3	0.222878557065413	3.32697254734225	1.09331477313067	0.327960384573762	0.714356726146512	-4.93042501007037
Q96EN9-1	C19orf60	-0.148970330232991	3.27477500573888	-0.492446865738164	0.644904858099713	0.866805368771237	-4.93067562665969
Q6P4I2	WDR73	-0.295030916949833	3.33355960282722	-1.65408243677488	0.163811742933795	0.635176224633546	-4.93079993954771
Q8IW70-1	TMEM151B	0.113545109644516	3.2918283137663	0.343865349795035	0.746040190022661	0.902742201194499	-4.93115226551435
P14672	SLC2A4	0.169015651522396	3.30616861819505	1.24001481202993	0.274232931349459	0.682960491309644	-4.93123528987463
Q16629	SRSF7	0.112380231106708	3.35435013653225	1.98897734706873	0.108079260080276	0.61045378725435	-4.93153714147041
Q8NB15-1	ZNF511	0.166955892726629	3.34848690750063	1.16988291968124	0.298841990981102	0.698037479805827	-4.93233003604271
P51397	DAP	0.122319552763896	3.29043712976045	1.70798837606179	0.153148614531005	0.629888102837026	-4.93274246135174
Q9NPC8	SIX2	-0.153968569595741	3.34229781448024	-1.49481365207875	0.199881639031497	0.645485366336148	-4.93307935165131
Q9BQE4	VIMP; SELENOS	-0.146029885050506	3.33383306021178	-1.61742206857672	0.17149015303657	0.639221410600478	-4.93319344206805
Q9NTJ4-4	MAN2C1	0.150386217984426	3.30032353920828	1.90786987478393	0.119453331360706	0.61592197485254	-4.93379358232109
Q9BSG0	PRADC1	0.176177184827673	3.29846014883556	1.24649227681753	0.272056155844445	0.682960491309644	-4.93396781908758
Q96ME7	ZNF512	0.138194158699577	3.28283038185692	1.68355869711709	0.157890779757635	0.629888102837026	-4.93410160834283
Q92544	TM9SF4	0.135382711039934	3.31415765213462	2.0463109053932	0.100734150582098	0.602922659433783	-4.93438829891832
Q12802-2	AKAP13	0.113461141055933	3.32933981464188	2.47811266016601	0.0600127648846118	0.579893610416486	-4.93471823376299
Q2MV58-2	TCTN1	0.171119317277556	3.31212649462476	1.16639673586829	0.30011592221978	0.698037479805827	-4.93512777529445
Q9Y2R4	DDX52	-0.134583255437072	3.29702744959633	-1.8770777177949	0.124095201045258	0.61592197485254	-4.93522612058142
P61088	UBE2N	-0.485502982254485	3.39454169628513	-1.83887019544649	0.130118328188664	0.61592197485254	-4.93559280027961
P07602-3	PSAP	0.127841199853225	3.3652851739615	2.1586516803519	0.0878428945836169	0.600401339037267	-4.93622565171764
Q8N4C6-7	NIN	0.100892383924794	3.341168199621	2.16687895035198	0.086971119040082	0.597945326025167	-4.93623450440415
Q9NWV4	C1orf123	-0.131622344564883	3.34002677899338	-1.80694046173863	0.135384901598911	0.619107450141729	-4.93717251636705
Q96QT4	TRPM7	0.135704003790236	3.31842738444205	1.80930994775377	0.134986581816591	0.619107450141729	-4.93857578435281
Q93015-2	NAT6	-0.186119232708816	3.30827657930031	-0.760524020546002	0.483923587739428	0.786658936699663	-4.93883832204377
Q9Y3D3	MRPS16	-0.259347897115529	3.33173101633119	-1.51511339576919	0.194878295842512	0.645214375174956	-4.93944991478059
Q68DC2-4	ANKS6	0.19114856108527	3.35934241943502	0.879773478572903	0.422380174757345	0.762351643309226	-4.93955205608514
P12821-1	ACE	0.191444402574013	3.31515566237769	0.956117431055642	0.386326455660267	0.74426099708435	-4.93957104193638
Q9Y421-1	FAM32A	-0.123452428336634	3.33582706682594	-1.77894221549468	0.140184636625526	0.622720080031207	-4.93983992506331
Q969S8-1	HDAC10	-0.112908958081317	3.29904812008124	-0.363905730295563	0.731983917440819	0.89878007597388	-4.9406554899685
Q8TDQ7	GNPDA2	-0.127425799806285	3.33140952660624	-1.64662404627453	0.165345257795405	0.636602416097472	-4.94180689819141
P04066	FUCA1	0.168814717165458	3.32321065337469	1.23876306113449	0.274655431017376	0.682960491309644	-4.94190691562439
Q9Y5L4	TIMM13	-0.156188299584396	3.32566375263296	-1.83245119103242	0.131159744521673	0.61592197485254	-4.94196191171918
P35244	RPA3	-0.677561926709476	3.38436616238269	-1.75121482073575	0.145111097848361	0.627138273705989	-4.94219970337551
Q14254	FLOT2	0.133860383772556	3.33863336398479	2.05280938318712	0.0999357680352477	0.600401339037267	-4.9427715014899
Q8NAT1	GTDC2; POMGNT2	0.135058118169609	3.33780021675692	1.55460858018129	0.185495400873264	0.642485434296894	-4.94317747012602
Q8NB37	PDDC1; GATD1	-0.265790186164495	3.3435501878884	-1.45063897155133	0.211208519505519	0.6500755924844	-4.94361211818565
Q9NRV9	HEBP1	-0.458275890066235	3.34318468643162	-1.68981252373432	0.156662760675789	0.629888102837026	-4.94383477535867
Q5T4D3-3	TMTC4	0.123006313415474	3.34616407860746	1.66574984416634	0.161441624006974	0.631227663096684	-4.94419501774681
P55345-1	PRMT2	0.152585569225385	3.30739562043908	1.34243033148005	0.241640439523971	0.665449191896868	-4.94438329122155
Q86UU0	BCL9L	0.132224533669562	3.3501772885071	1.71914714784954	0.151031102829544	0.629888102837026	-4.94462137470575
Q9UK39	CCRN4L; NOCT	-0.146654406385917	3.3294785469976	-1.55369098922011	0.185708227909571	0.642485434296894	-4.94498407350527
Q96JX3-1	SERAC1	-0.0118168780689629	3.34162781918898	-0.0354825059189194	0.973176513912998	0.992579791760021	-4.94540818631583
Q9HC96	CAPN10	-0.00346322017924202	3.40721812898046	-0.00966170258210677	0.992694377667034	0.999777793991085	-4.94575038646269
Q9H5Q4	TFB2M	-0.137944413524847	3.26493554369289	-1.93099032172223	0.116087884095257	0.613199272208859	-4.94596493480966
P30044-1	PRDX5	-0.341583137263508	3.34084026206285	-2.08819844039742	0.0957049422031194	0.600401339037267	-4.94608775891881
Q14344	GNA13	0.118395394337185	3.34894095469573	1.94060323447869	0.114718102528401	0.612936540749083	-4.94662466790816
O14807-1	MRAS	0.165078998406379	3.33205015187531	1.17108057649061	0.29840546345528	0.698037479805827	-4.94665412573888
Q14258	TRIM25	0.0938732914746473	3.3214185822477	2.12930886366856	0.0910295889948788	0.600401339037267	-4.94675916921858
Q9Y240	CLEC11A	0.204318874243911	3.32283107473097	1.09816707029282	0.326043339927008	0.713340622976458	-4.94682672401051
O43556-4	SGCE	-0.178872480193222	3.30033209287941	-0.986319536290011	0.372777074321236	0.737370566106193	-4.94687296238912
O75683	SURF6	-0.2472300040655	3.26866237680437	-2.03800958449864	0.10176392854761	0.603321417480837	-4.94724432199889
Q9BQ65	USB1	0.158888135892678	3.29609398974142	1.5577714738346	0.18476365172435	0.642485434296894	-4.94818682779209
Q9NW68	BSDC1	0.118983815318752	3.31616884632744	1.88399244395686	0.123036623232209	0.61592197485254	-4.94861357086952
Q08999	RBL2	0.183058295050901	3.29024300776523	0.824462018478867	0.450131647998159	0.768913405268987	-4.94965475502915
Q7Z2Z1	TICRR	0.135380170686975	3.31044755619226	1.9814468758786	0.109085451977587	0.61045378725435	-4.94990510537377
Q99627-1	COPS8	-0.198137392770235	3.34446057578575	-1.87621423350374	0.124228059462118	0.61592197485254	-4.95047708058513
Q8IYS1	PM20D2	-0.300580504661192	3.34728395271966	-1.81985418559573	0.133228727105312	0.617066410330305	-4.95125970702385
Q9Y6G3	MRPL42	-0.136020389852736	3.2680752006786	-1.60544992340405	0.174075363428496	0.639221410600478	-4.9519514230161
P09543-1	CNP	0.0934671293658894	3.32556005366949	2.17540343023683	0.086077686583596	0.597945326025167	-4.95202270831671
Q05D32	CTDSPL2	0.173387853744518	3.30350909654191	1.91940958834676	0.117760959143688	0.613199272208859	-4.95261434701535
Q96HR9	REEP6	0.135282313285283	3.34707523373065	1.50776817692733	0.19667430397718	0.645214375174956	-4.9538700096715
Q9NP81-1	SARS2	-0.10733424496072	3.25455903482562	-2.03867849252482	0.101680536536174	0.603321417480837	-4.95421895922734
Q1ZZU3	SWI5	0.186482740629632	3.34007474397277	0.775642882812056	0.475767723659789	0.782172234003542	-4.95427208672521
Q03164-3	KMT2A; MLL	0.112832045905436	3.33285439316224	2.00921388211555	0.105423763848059	0.607754146222284	-4.9550123297618
P19623	SRM	-0.160624300270714	3.3222171010588	-1.97646137841158	0.109757047150156	0.61045378725435	-4.95557765078614
P98179	RBM3	0.106543701720593	3.35454472687358	1.97579954630165	0.109846530815922	0.61045378725435	-4.95587028788603
Q7L211	ABHD13	0.149094250253897	3.32766929226885	1.39382548032499	0.226695802096158	0.65775315876855	-4.95614717133448
Q96HH4	TMEM169	0.189736594322926	3.28985698054824	1.3739924774172	0.232355232631644	0.661910098314009	-4.95758843108578
Q8TAM2-4	TTC8	0.133150764053303	3.29880764894622	1.67187406824612	0.160211484167753	0.629888102837026	-4.95803080245318
O15527-4	OGG1	-0.0279526432897287	3.34904731482463	-0.0836872114236992	0.936809057872169	0.978969575833321	-4.95901510275688
Q99538	LGMN	0.17383961169292	3.31455326084434	1.21939313734879	0.281269942548362	0.687585407942271	-4.95911960458409
O75600-2	GCAT	-0.0559649624084385	3.29489939602005	-0.175844959802025	0.867860923725455	0.949865082030675	-4.95997095008076
P42568	MLLT3	0.170682683686498	3.33891051525883	1.02864082610409	0.354461964443468	0.730025501572735	-4.96014178233918
Q8IXV7	KLHDC8B	-0.194361387253132	3.33307859282414	-0.992226404293557	0.370173949486681	0.737294593487698	-4.96129878487608
Q8IZ69	TRMT2A	-0.112427837541033	3.32224934611617	-2.0360049839895	0.102014276389463	0.603321417480837	-4.96136370116499
Q01094	E2F1	0.168799352667075	3.32283152866049	1.49447478472696	0.199966223232034	0.645485366336148	-4.96154760474955
Q96EK7	FAM120B	0.115543784895852	3.31547742261992	2.17190752797906	0.0864428807500118	0.597945326025167	-4.9616335429641
Q8N7B6	PACRGL	-0.231177216193196	3.33969902361418	-1.47644354435233	0.204517944321205	0.64872967422434	-4.9618171477438
Q8N8Q9	NIPA2	0.179769771112524	3.30987699372798	1.40051383494243	0.224817222457279	0.656831899771047	-4.96266132958302
Q9ULW3	ABT1	-0.169992154508414	3.27595092160542	-1.75374004126563	0.14465514770112	0.627064644428778	-4.96398230587691
Q7Z4H3-1	HDDC2	-0.248650212335822	3.33584368442163	-1.69267378661868	0.156104159200252	0.629888102837026	-4.96401782654543
Q8N4Q1-2	CHCHD4	-0.142138023269312	3.33341975619781	-1.38850226546877	0.2282017068724	0.65775315876855	-4.9646016821016
Q9P0W5-5	IQCJ-SCHIP1; SCHIP1; IQCJ	-0.157371876164318	3.29119117305694	-1.39498785561288	0.226368243569782	0.65775315876855	-4.964612526045
P05204	HMGN2	-0.381248052623305	3.37736610316916	-1.56284574440403	0.183595688373629	0.642485434296894	-4.96565011198935
A1L170-2	C1orf226	0.146980366296232	3.32096737132892	1.4256764837142	0.217883025352827	0.653616529153469	-4.96674011211788
O15156-2	ZBTB7B	-0.171153571640514	3.34168125620432	-1.05979931258481	0.341472050526262	0.724041730896042	-4.96775050203957
Q49AM1	MTERFD3; MTERF2	-0.174532439768318	3.2885375386147	-0.75107091548503	0.489074914422204	0.789567810360148	-4.96816157144529
Q7Z3I7	ZNF572	0.175326046243636	3.31816531706411	1.01424766491887	0.360603483906707	0.73138458439083	-4.96839043540275
Q96MN5	TCEANC2	-0.109477660817225	3.3178892295222	-1.74930323527689	0.145457232632559	0.627138273705989	-4.96849179117119
Q96GK7	FAHD2A	-0.277228978438362	3.3354734691567	-1.78848193161406	0.13852979926124	0.622141026048865	-4.96991213003187
Q96JI7-1	SPG11	0.0934697002503568	3.31572226337835	2.0844109630524	0.0961484514152289	0.600401339037267	-4.97005827362873
Q86V25	VASH2	-0.15671864488056	3.29595702560034	-1.20861322085729	0.285013933225148	0.689706749420923	-4.97102461221473
Q15051-1	IQCB1	-0.11892596332101	3.26489783824776	-1.88836991229979	0.12237136205057	0.61592197485254	-4.97145966472821
Q9HAT8	PELI2	-0.110545510110333	3.29507290285895	-1.73082598681952	0.148846941684598	0.629888102837026	-4.97270277313262
O60331-3	PIP5K1C	0.125037572500223	3.3278051651841	1.52936396103957	0.191439844197489	0.645057578060008	-4.97349668097441
P62424	RPL7A	-0.397842351829447	3.25146606760396	-2.37706204889678	0.0675995251035271	0.585241326815686	-4.97451644537296
Q9BRJ6	C7orf50	-0.163200601195038	3.28374082249916	-1.8290203402968	0.131719913198509	0.61592197485254	-4.97460237907265
Q9Y5Z7	HCFC2	0.131144337762886	3.3292054975101	1.82726565947246	0.132007366975831	0.616823660936394	-4.97494584132336
Q6L9W6	B4GALNT3	0.172362606899772	3.36838012586033	0.862060849674301	0.431117538993751	0.764431782074966	-4.97637935847881
Q9BXM9-1	FSD1L	-0.0976707783823531	3.29615315240902	-1.91071582340473	0.119033596205949	0.61592197485254	-4.97661976829693
Q96MU8-2	KREMEN1	0.106550837766175	3.36567756986007	0.36127231545471	0.733824212944014	0.899317647618538	-4.97900649406646
Q9NX46	ADPRHL2	-0.110327144616935	3.31491486747759	-1.86292663611621	0.126291374563527	0.61592197485254	-4.98006835855344
O15327	INPP4B	0.147200191198476	3.30837528488328	1.4003529319866	0.224862239732191	0.656831899771047	-4.98091181149795
Q7L8W6	ATPBD4; DPH6	-0.602665408484305	3.35954477960133	-1.60226987790592	0.174768597859518	0.639221410600478	-4.98092917747235
P46934-4	NEDD4	0.102067876271376	3.32797447471336	1.85957877991607	0.126816855008323	0.61592197485254	-4.98098053417356
Q92995	USP13	-0.17399633494916	3.32421989026518	-2.08923883409892	0.0955834971082592	0.600401339037267	-4.98189681609043
Q9NQ88	C12orf5; TIGAR	-0.119925933111505	3.30223848816368	-1.87223162151852	0.124842763501378	0.61592197485254	-4.98287699279154
Q9HAN9	NMNAT1	0.15060829061353	3.33327692593647	1.70904995505874	0.152945868726694	0.629888102837026	-4.98309596804527
Q96N11	C7orf26	0.13105972013669	3.31514292029071	1.72932540510305	0.149125758740647	0.629888102837026	-4.98355285375036
P31930	UQCRC1	-0.145412601232235	3.27099754003246	-2.15686482780405	0.0880334750462672	0.600401339037267	-4.98488860919781
Q9NVU7	SDAD1	-0.208115935334887	3.25149486129998	-2.09177434814694	0.0952882173080615	0.600401339037267	-4.98606821843376
P53350	PLK1	-0.118941956222671	3.27930054948528	-2.21370962635124	0.082183525985741	0.597945326025167	-4.98624265201452
P09455-1	RBP1	-0.113843559792662	3.34441646940582	-2.08055044715513	0.0966027778648187	0.600401339037267	-4.98648435049106
Q7Z5Q1-9	CPEB2	-0.296614230598392	3.33317508785285	-1.5954750612894	0.176259120833969	0.639221410600478	-4.98746991497789
Q9UNL4-1	ING4	0.132281436988319	3.30685920512185	1.61008457384837	0.173069968490902	0.639221410600478	-4.98779062601931
Q8IVF2-1	AHNAK2	0.126862075504182	3.29853082030654	0.467532139461858	0.661336100324866	0.874304838209708	-4.98805665083681
Q9BZC7-3	ABCA2	0.163429406739825	3.35077002404898	1.1023657728334	0.324392450274003	0.71217684105454	-4.98817994918976
Q9C0I4	THSD7B	-0.0801220637536125	3.34353574380432	-0.250256672909859	0.813132895213438	0.928720529175785	-4.98831250586548
Q8WUU5	GATAD1	-0.117271272633578	3.32121001302415	-1.58519835885149	0.178537647501776	0.640890926905665	-4.98993163092352
P55058	PLTP	0.151143375113377	3.36189081293135	1.21510510823251	0.282753814145121	0.687984762029692	-4.99110714803695
Q96EV2	RBM33	0.122300567548388	3.35622692488922	2.085474997541	0.0960236324230046	0.600401339037267	-4.99117424414793
Q9H819	DNAJC18	-0.15571577479429	3.26029603441459	-1.27668289883753	0.262119544709067	0.67809981846355	-4.99136198715828
Q96N38-1	ZNF714	-0.167307360759079	3.26731104095376	-1.20883249635706	0.284937325521514	0.689706749420923	-4.99167512886464
O75643-1	SNRNP200	0.0895840025626574	3.32396904828397	2.97756230953307	0.0340815235677371	0.571330856959487	-4.99210722268013
Q6PH81-1	C16orf87	-0.14693416543253	3.30028290243641	-1.25446336501623	0.26939931229333	0.680931675948211	-4.99288026525338
Q9NXF7	DCAF16	-0.202695465061768	3.31711469638765	-1.78410355397118	0.139286790490978	0.622442137443715	-4.99295544779918
Q9BZC1-1	CELF4	0.147281262176558	3.31616360636488	1.36090827359284	0.236162494119614	0.661910098314009	-4.99307469866787
Q8TBC5-3	ZSCAN18	0.130701523776487	3.34215956127128	1.64462753221825	0.165758215894969	0.636602416097472	-4.99456299663725
Q99943	AGPAT1	0.140913665314683	3.33679956427081	1.623669692907	0.170156424050146	0.639221410600478	-4.9952008827059
Q5XKK7	FAM219B	0.178320178446825	3.33297143841705	0.867154111913149	0.428590684416	0.764431782074966	-4.99602355418834
P10586-1	PTPRF	0.136034938617768	3.35836612069994	2.18475781091082	0.0851086630090668	0.597945326025167	-4.99617019415063
Q9H1Z4	WDR13	-0.281959511576941	3.33521621408936	-1.76433928048097	0.142757372225597	0.626303905597185	-4.99620122861754
P17020	ZNF16	-0.122761645369772	3.33265591372897	-0.446409981355996	0.675441750959381	0.878715741181928	-4.99621688882743
P49917	LIG4	-0.119141760716114	3.30225477639043	-1.99171748602522	0.107715577007005	0.61045378725435	-4.99630897129603
Q9NPD8	UBE2T	-0.506992011384643	3.36246444489405	-1.91803351064204	0.117961440367615	0.613199272208859	-4.99663807825027
O60279	SUSD5	0.20371804649284	3.27134105246166	1.83561793751139	0.130644894266999	0.61592197485254	-4.99699717296927
Q7Z412	PEX26	0.17917029485459	3.33405878316579	0.85100786916853	0.436641199322106	0.765476558895705	-4.99757517914735
Q9H6R6-1	ZDHHC6	0.156923770395144	3.33446923347354	1.64848376356094	0.164961529713544	0.636602416097472	-4.99803608928062
Q9Y6X5	ENPP4	0.133936645482607	3.33084934366988	1.46749493742437	0.206814372834138	0.649566481750329	-4.99924058988625
Q8TDY4-1	ASAP3	0.104033895176655	3.32218127919899	1.78744146183117	0.138709303605594	0.622141026048865	-4.99979043323883
Q9NP66	HMG20A	0.106784850140699	3.35030790520493	1.84261693463153	0.129514437231726	0.61592197485254	-5.00004180273505
Q9BVK2-1	ALG8	0.14794081272702	3.35441601592569	1.34148022000327	0.241925341507828	0.665498501628381	-5.00041734877392
Q6ZNW5	GDPGP1	-0.159914722379309	3.38354772266487	-1.20186259869274	0.287381576076854	0.690591185137827	-5.00051981192983
Q08357	SLC20A2	0.158346079086427	3.33979409790572	1.41242398864567	0.221508974964447	0.656020979424678	-5.00128718510237
Q13829	TNFAIP1	-0.0935285838785301	3.31234607587046	-0.327343634190085	0.757715472490111	0.907067807276333	-5.00203370657015
Q6UB28	METAP1D	-0.166142726230012	3.28122248088319	-1.5201497708387	0.193656183791861	0.645214375174956	-5.00287170406853
Q9H813-2	TMEM206	0.142170742969529	3.30178874301594	1.60421456467618	0.174344337497736	0.639221410600478	-5.00290714434356
Q9UHQ4-2	BCAP29	0.148201426594019	3.35763114096424	1.71566205933553	0.151689209232156	0.629888102837026	-5.00294572028131
P23229-1	ITGA6	0.151475440426268	3.32235320193159	1.20594017290791	0.285949318564302	0.690136206351844	-5.00339331427234
Q9UI47-1	CTNNA3	0.146881238439553	3.33494966743311	1.28992363160149	0.257868873741669	0.677755997436062	-5.00366457498423
Q8NBA8	DTWD2	-0.142196620260672	3.26687646162688	-1.30118976444287	0.25430287198257	0.673893364986999	-5.00377485470616
[truncated: 6,337 more rows]
