# Supplementary material for: Thalidomide promotes degradation of SALL4, a transcription factor implicated in Duane Radial Ray syndrome
Source: eLife journal article supplement (doi:10.7554/elife.38430), 2018-08-01
Supplement: supp [file elife-38430-supp-v1.zip › elife_poa_e38430_Figure_1_source_data_13.csv]

	ID	logFC	AveExpr	t	P.Value	adj.P.Val	B
Q96JP5-1	ZFP91	-2.47692712986506	2.49843910106009	-26.5031313624464	9.69850368404394e-08	0.000641741185170868	4.61906846630762
O15060	ZBTB39	-2.11228739133731	2.59878321238299	-23.7849898822691	1.91564532886826e-07	0.000641741185170868	2.6888253370933
O95785-3	WIZ	-0.31635428230108	3.25053549922553	-9.31608885663659	6.21585186256869e-05	0.0832924149584205	2.48935761418909
Q8N5C7-1	DTWD1	-1.74350824928279	2.75480651809458	-19.8238135557763	6.00472878493344e-07	0.00100579207147635	2.08211405346145
P51157-1	RAB28	-1.73815935211281	2.83178988032383	-22.2732559574254	2.89344359059888e-07	0.000646202401900417	1.78079351568634
Q15121-2	PEA15	0.670687853273113	3.37593676425275	7.68573077971897	0.000192956095324154	0.18468654838169	1.33826945380317
Q9HBE1-1	PATZ1	-0.363128793582031	3.22416271372518	-7.48396922086384	0.000225085679144963	0.188509256283907	1.08431746059219
P36954	POLR2I	0.385815399324382	3.42048012003716	5.41972543125991	0.00136249158637318	0.932039001363628	-0.517626322629437
P60660-2	MYL6	0.286158118327382	3.38321463816814	5.24448960671227	0.00162291389209019	0.932039001363628	-0.892392936781722
O43768-4	ENSA	0.352194885684599	3.33482159781898	4.85597834999635	0.00242640645120927	0.932039001363628	-1.0858295936114
Q9H116	GZF1	-0.993764422528576	3.07116474329312	-7.69689396414636	0.000191337561487337	0.18468654838169	-1.14542627203758
Q15369-1	TCEB1; ELOC	0.298350130881407	3.36455840942293	4.72536721922755	0.00279058626809952	0.932039001363628	-1.27379948759235
P56211	ARPP19	0.457350613909873	3.37441440185932	4.56170140324709	0.00333638278698244	0.932039001363628	-1.36163905790944
Q8IYD1	GSPT2	-0.169196759748077	3.3154773416379	-4.54316723749115	0.00340538773749139	0.932039001363628	-1.39246698568023
Q6UX15	LAYN	-0.376688563634095	3.3386500691087	-4.32705251455174	0.00433951656122628	0.932039001363628	-1.64331305362296
Q9H582-1	ZNF644	-0.182734265118518	3.27896217663162	-4.28307107549491	0.00456280587378368	0.932039001363628	-1.65344432038295
Q53GQ0	HSD17B12	0.255531924299303	3.31698151194837	4.19112063946553	0.00507217121171964	0.932039001363628	-1.72404978722142
Q9BRA2	TXNDC17	0.194036088617346	3.344909926425	4.12953770968534	0.00544859616364945	0.932039001363628	-1.77616895661252
Q15785	TOMM34	0.0986318667632867	3.33812600096078	4.49837219478262	0.00357885117666468	0.932039001363628	-1.81756801216952
P54709	ATP1B3	-0.320610541990428	3.31667440723459	-4.12470725432122	0.00547941029625198	0.932039001363628	-1.86235079664264
Q8N9F7	GDPD1	-0.272050568334651	3.34815240960163	-3.95579798219126	0.00668870625692632	0.932039001363628	-2.00421642161623
P17677-2	GAP43	-0.186926299981109	3.33688006180743	-4.10706996321568	0.00559357559004393	0.932039001363628	-2.02104021541982
P04080	CSTB	0.399317938778468	3.36172358078519	3.992902689596	0.00639963645973342	0.932039001363628	-2.03499274452243
Q9H0X4	ITFG3; FAM234A	-0.457551012126857	3.28161941681198	-3.8288298427021	0.00779269361211167	0.932039001363628	-2.08012382278659
Q92618	ZNF516	-0.129283572017884	3.25486467356342	-4.0334709807851	0.00609932266049268	0.932039001363628	-2.13604798693145
Q9Y4P3	TBL2	-0.205651704639347	3.36425087293181	-3.61068076284091	0.0101900878933534	0.932039001363628	-2.3205548513773
P51572-2	BCAP31	-0.305327007965254	3.32763660231468	-3.8179104552532	0.00789665843099335	0.932039001363628	-2.35774042283866
P60520	GABARAPL2	0.114010190376743	3.36929962183748	3.75418801277341	0.0085347399607554	0.932039001363628	-2.42163296985622
Q9NQC3	RTN4	-0.187931465512017	3.33107956476561	-3.85168181602431	0.00757997301638738	0.932039001363628	-2.45125885914381
Q14118	DAG1	-0.155773019226558	3.34624735075507	-3.5056294478081	0.0116251559371584	0.932039001363628	-2.47249926679569
P16949-1	STMN1	0.374657538874253	3.31329612219274	4.24698715869135	0.00475557732843802	0.932039001363628	-2.50416801748383
Q9H3K6-1	BOLA2B; BOLA2; LOC107984053	0.290286454209707	3.32954351177109	3.72282831390745	0.00886946061819626	0.932039001363628	-2.53861646231136
Q9Y3B7-1	MRPL11	0.167759333709181	3.26779774050505	3.58871931368703	0.0104732149958367	0.932039001363628	-2.55069946029364
Q86SX6	GLRX5	0.541425516795564	3.31424951902446	3.38839371029476	0.0134930793833783	0.932039001363628	-2.58032470055697
P27824-2	CANX	-0.265309035351101	3.33716561101693	-3.74360978506582	0.00864606618238607	0.932039001363628	-2.61341130715898
Q08AD1	CAMSAP2	-0.0812991910651333	3.30540087637632	-3.72567516688792	0.00883848541911841	0.932039001363628	-2.65089034546652
O00244	ATOX1	0.417342172160137	3.35215917326229	3.52255170408354	0.0113797368267042	0.932039001363628	-2.66763453746956
Q9HC52	CBX8	-0.112420657725596	3.31427930741099	-3.61133960297325	0.0101817249738178	0.932039001363628	-2.67682724691212
Q8IZJ1	UNC5B	-0.33853052376823	3.01688566454246	-3.34868960093222	0.0141980762670787	0.932039001363628	-2.68724506209331
Q99584	S100A13	0.330236689744653	3.30587335929434	3.39523053389742	0.0133755820637856	0.932039001363628	-2.70167881228222
Q9P1F3	ABRACL	0.415128118573409	3.30358593352265	3.27306306349649	0.0156545172744963	0.932039001363628	-2.70961431476456
Q8WUH1	CHURC1	0.197909282740615	3.42087450761241	3.22635363891858	0.0166347094164939	0.932039001363628	-2.73945640403255
Q96RD7-1	PANX1	-0.253789442335434	3.33116062001121	-3.17100990618208	0.0178831303844557	0.932039001363628	-2.80229993039387
O96005-1	CLPTM1	-0.341197437620885	3.32382851020073	-3.21592401421336	0.0168625523042809	0.932039001363628	-2.82984882210532
O60333-3	KIF1B	-0.115146936087694	3.17403256441796	-3.25251435783095	0.0160777769557598	0.932039001363628	-2.84690258977166
P13637-3	ATP1A3	-0.167981662899442	3.30937662939299	-3.26071319412046	0.0159074258558502	0.932039001363628	-2.87159484709849
O15344-1	MID1	0.205893451944855	3.34371769736672	3.09793646123617	0.0196892964163115	0.932039001363628	-2.92743813416173
Q9H0D6-1	XRN2	0.0589247745338973	3.32174269803473	3.78333562859186	0.00823607796312452	0.932039001363628	-2.9392612487902
Q86U86-1	PBRM1	-0.100282682587389	3.30701462891214	-3.87729814690041	0.00734911282243659	0.932039001363628	-2.96421884416001
Q8NCB2-1	CAMKV	-0.125749274292949	3.35051765418722	-3.17271563471327	0.0178431717092018	0.932039001363628	-2.97780400738538
P12829	MYL4	0.299024323151692	3.3090965495361	2.99229963950562	0.0226572788711122	0.932039001363628	-2.99720289721221
P62917	RPL8	0.244187143724758	3.32346319357358	3.50300648556285	0.0116637122136544	0.932039001363628	-3.02115924265227
Q5BJF6	ODF2	-0.0936300416004317	3.27877147639705	-3.31723756470582	0.0147850531491552	0.932039001363628	-3.02279790269523
Q9H3C7	GGNBP2	0.176086029781195	2.95446789665943	3.00194549008976	0.0223672407552543	0.932039001363628	-3.02433334603339
O43924	PDE6D	-0.258656348825761	3.32684133698933	-2.95356382884997	0.0238633758395126	0.932039001363628	-3.03987510229602
Q9Y4G6	TLN2	-0.0605389435308857	3.3234502620799	-3.67239883730566	0.00943844610666294	0.932039001363628	-3.04664521883069
A6NFI3	ZNF316	-0.211963767972419	3.26689569143929	-3.03488137051987	0.0214066255315592	0.932039001363628	-3.05438632534582
P50395-1	GDI2	0.0562382527221386	3.34281077686807	3.95516348794421	0.00669377349688812	0.932039001363628	-3.06693765217928
O15431	SLC31A1	-0.321084579036516	3.34678611612561	-2.92596274553828	0.0247647476621162	0.932039001363628	-3.07643465448537
Q9Y330	ZBTB12	-0.204684331452434	3.35132858962276	-2.91321234079155	0.0251934048109622	0.932039001363628	-3.08579015594925
O00255-2	MEN1	-0.152758250713893	3.27579981723638	-3.03647021824901	0.0213614221073148	0.932039001363628	-3.09069825784527
Q9H0U9	TSPYL1	-0.175561662208547	2.81954268056808	-2.94500821128886	0.0241389541438891	0.932039001363628	-3.09383017469555
Q6GMV3	PTRHD1	0.514131947658943	3.34169808532019	2.88287715251144	0.0262455214508005	0.932039001363628	-3.11698659093403
Q9Y5M8	SRPRB	-0.206889911515579	3.36659387679627	-3.01318054470494	0.0220344430370698	0.932039001363628	-3.13365448049683
P04198	MYCN	0.142777052954645	3.38883657907358	3.07306095111081	0.0203483557303806	0.932039001363628	-3.13643250871532
P00374	DHFR; DHFRP1	0.0703635406299313	3.34061526700382	3.3894039516132	0.0134756467381467	0.932039001363628	-3.13716835856987
P29966	MARCKS	-0.190827244976599	3.26377018567997	-3.71513127772802	0.00895380841683062	0.932039001363628	-3.1410470111357
Q9H9Y2	RPF1	0.171991839345216	3.29372700074914	2.90900745768404	0.0253365068711944	0.932039001363628	-3.15045294827425
Q01650	SLC7A5	-0.38111815159911	3.28964916272464	-2.90428989228781	0.0254980937359898	0.932039001363628	-3.15221406393853
O75477	ERLIN1	-0.179877077309442	3.34876852909836	-2.94817157466509	0.0240366656775258	0.932039001363628	-3.17229057229389
Q96SW2-1	CRBN	0.141847540632291	3.32505401723605	2.9985507846488	0.0224688571900703	0.932039001363628	-3.20224058173857
P28072	PSMB6	0.206451045965017	3.38535147706907	3.08261729685209	0.0200923926225896	0.932039001363628	-3.20379584009284
Q9Y3U8	RPL36	0.241927307023224	3.34895653816234	3.13615065712184	0.0187213337393589	0.932039001363628	-3.20962232927943
Q9H0B6	KLC2	-0.0928670748392302	3.30726827175643	-3.27224856673767	0.0156710617622167	0.932039001363628	-3.22519149121477
Q02543	RPL18A	0.175766455072457	3.32343965644342	3.42713640682675	0.0128418208208253	0.932039001363628	-3.22596872339891
Q7Z6B7-1	SRGAP1	-0.16225549411165	3.2563407450139	-2.82484384646655	0.0283914969267351	0.932039001363628	-3.24056383418841
Q15013-3	MAD2L1BP	0.20804855109775	3.29716950670609	2.74933563596766	0.0314679085438052	0.932039001363628	-3.26316034380605
Q8N4Q1-2	CHCHD4	-0.395516461789257	3.31065689324113	-2.86407015658241	0.0269213414903748	0.932039001363628	-3.27671293693911
P17600	SYN1	-0.130667028543985	3.30659472298534	-2.93689756846302	0.0244033542708321	0.932039001363628	-3.27867148516633
P46776	RPL27A	0.353972351835456	3.31223334576803	3.19825253573066	0.0172563625108638	0.932039001363628	-3.27995381293274
P56373	P2RX3	-0.166079760086951	3.31377855375658	-2.81888589239612	0.0286221886706008	0.932039001363628	-3.28556691996536
Q9NX38	FAM206A	0.207442571284163	3.34303346877598	2.72581622035509	0.0324971002771736	0.932039001363628	-3.29086257572666
Q9H2P9-5	DPH5	0.149494246179625	3.39289372119445	2.87666394969999	0.0264667607956404	0.932039001363628	-3.29740134252498
P46976-1	GYG1	0.108147151559726	3.36511329553248	3.1322778764487	0.0188170479333081	0.932039001363628	-3.29806777387724
Q9NUG6	PDRG1	0.3385295539911	3.32141239196166	2.88133170553844	0.0263003661759231	0.932039001363628	-3.31235119934178
P61927	RPL37	0.329766373146878	3.32882157681359	2.78979992422047	0.0297774445229456	0.932039001363628	-3.32475049116715
P36578	RPL4	0.134077301611739	3.32558170878614	3.54448187074334	0.0110700949615992	0.932039001363628	-3.32974441009859
P58107	EPPK1	0.260523847678969	3.27448150167202	2.71046466641322	0.0331880999998934	0.932039001363628	-3.36262001858683
Q9ULC3	RAB23	-0.209173065800453	3.36327336315379	-2.88675454005264	0.0261084588204353	0.932039001363628	-3.36303719688221
P62899-2	RPL31	0.311352347735398	3.33999926155585	2.99429813314628	0.0225968562879415	0.932039001363628	-3.36850824879208
Q8N4C6-7	NIN	-0.125268665258183	3.25412634818549	-3.00199041864302	0.0223658991915891	0.932039001363628	-3.37847407395576
P28799	GRN	-0.242843984467946	3.35917655857839	-2.65849337914336	0.0356453441514703	0.932039001363628	-3.38638285874232
Q12846	STX4	-0.184956055234064	3.36523638870314	-2.66389310364952	0.0353813029394879	0.932039001363628	-3.38919914020152
P43307	SSR1	-0.282510702842118	3.36290624533766	-2.63894960923931	0.0366185589995266	0.932039001363628	-3.39409367924498
P62805	HIST1H4A; HIST1H4F; HIST1H4D; HIST1H4J; HIST2H4A; HIST2H4B; HIST1H4H; HIST1H4C; HIST4H4; HIST1H4E; HIST1H4I; HIST1H4B; HIST1H4K; HIST1H4L	-0.118942545897665	3.36757086739608	-3.12107893407625	0.0190968147283806	0.932039001363628	-3.39762506254531
Q07020	RPL18	0.151751731439609	3.31772474512473	2.91396841092912	0.0251677659308563	0.932039001363628	-3.39793882016456
Q9HAU0-6	PLEKHA5	-0.0705549144666784	3.31858988654239	-3.12225312995007	0.0190672715805512	0.932039001363628	-3.4033551621982
Q9H0V9-2	LMAN2L	-0.138025172167326	3.35259218695605	-2.75420189103293	0.0312593203870236	0.932039001363628	-3.41377106213531
O15514	POLR2D	0.228897426303609	3.35620486875278	2.72765687654007	0.0324152797595871	0.932039001363628	-3.41549454030686
C9JLW8	FAM195B; MCRIP1	0.346866402745191	3.32527464322334	2.86604402296051	0.0268495454457776	0.932039001363628	-3.42044174159633
Q68DK7	MSL1	-0.0975809854164966	3.2882932461885	-2.85487148504945	0.0272586441441477	0.932039001363628	-3.42651632195174
Q96PC5	CTAGE5; MIA2	-0.212550989646395	3.36411892746501	-2.5938898917709	0.0389708288449864	0.932039001363628	-3.43345451793843
P60033	CD81	-0.209698918754705	3.37576274542883	-2.70236088177313	0.0335591332603974	0.932039001363628	-3.45228680858327
Q9GZZ1-1	NAA50	0.0900378965081265	3.38311781209377	3.26352026300343	0.0158495534631929	0.932039001363628	-3.48262243461464
Q6UWP7-1	LCLAT1	-0.227943590863425	3.34483602485508	-2.54302553602067	0.0418185100832163	0.932039001363628	-3.48744802002433
Q9UK45	LSM7	0.365122156741897	3.27057972358517	2.7978981450269	0.0294508852059887	0.932039001363628	-3.49337616047449
Q14108-1	SCARB2	-0.246646118183215	3.34631808491108	-2.88961025111595	0.026008001484074	0.932039001363628	-3.49866087109956
Q9Y3E2	BOLA1	0.305101689180024	3.3546535397657	2.64142009467195	0.0364940022306077	0.932039001363628	-3.50639329866135
Q99757	TXN2	0.436268890816685	3.30986980704544	2.66228769440518	0.0354595891621865	0.932039001363628	-3.50855303750515
Q96FZ7	CHMP6	-0.198684285321403	3.3738709016259	-2.60890612134798	0.0381697119860117	0.932039001363628	-3.51337287167439
O75683	SURF6	0.110011750006926	3.37635116452371	2.80752880883397	0.0290674893613627	0.932039001363628	-3.51367816954613
Q4VCS5	AMOT	-0.167027493643656	3.34546681106073	-2.7151496511717	0.0329755832970951	0.932039001363628	-3.51875371088437
O15173-2	PGRMC2	-0.179156217579125	3.33431407885935	-2.52528917983678	0.0428622020119853	0.932039001363628	-3.52039649911281
O15258	RER1	-0.163433140463642	3.36336427805945	-2.71126820287221	0.0331515476560415	0.932039001363628	-3.52053841511112
P11234-2	RALB	-0.320834578401058	3.36033192245105	-2.55009434630919	0.0414100113639847	0.932039001363628	-3.52270655162293
Q9UKK9	NUDT5	0.0939941373569091	3.34443100413816	3.16755279654057	0.0179644147446229	0.932039001363628	-3.53921895621596
Q9UQR1	ZNF148	-0.148368590785842	3.30249263557776	-2.88160907119499	0.0262905140208515	0.932039001363628	-3.54206093479931
Q9H5I1	SUV39H2	-0.110502422869665	3.35243341411029	-2.67040311934494	0.0350657168989922	0.932039001363628	-3.54334498449904
Q9Y2H6	FNDC3A	-0.206945354748795	3.32329784633042	-2.53059380077592	0.042547218916398	0.932039001363628	-3.54758236117245
Q15906-2	VPS72	-0.202882936927491	3.26663637403951	-2.55272104556951	0.041259286968361	0.932039001363628	-3.54989120348393
O95197	RTN3	-0.179947417592953	3.33075598610599	-2.87863765306018	0.0263962658819784	0.932039001363628	-3.57768184459116
Q9BZF9	UACA	-0.136786933727245	3.31738627087477	-2.51744986753639	0.0433321758354064	0.932039001363628	-3.58140298395335
P05386	RPLP1	0.294637953337555	3.36209396811564	2.44883875867344	0.0476830098196768	0.932039001363628	-3.58533845938491
Q9UKX7	NUP50	-0.0679434139667	3.31601392878661	-3.27648641093784	0.0155851877253628	0.932039001363628	-3.58667500619028
Q02818	NUCB1	0.112715265150226	3.32950830296228	2.87751579661442	0.0264363106473746	0.932039001363628	-3.6065791390794
Q6FIF0	ZFAND6	-0.117783054636911	3.3753987814913	-2.69931692158662	0.0336996352413995	0.932039001363628	-3.60672511952178
Q13907	IDI1	0.151557829828437	3.34452386257026	2.85873325503247	0.0271164915837993	0.932039001363628	-3.60736191967535
Q96BJ3-1	AIDA	-0.0972953407368187	3.36908070707611	-2.80628343384406	0.0291167667981016	0.932039001363628	-3.6188937223201
P13994	CCDC130	-0.15401267822101	3.2905075784624	-2.46867304229576	0.0463802338593965	0.932039001363628	-3.62271066334554
Q9P0L0	VAPA	-0.208246310953307	3.33583951484104	-2.99565805057411	0.0225558395304707	0.932039001363628	-3.63745539670394
P43007-1	SLC1A4	-0.191862781854891	3.31934396588854	-2.45793500974274	0.0470808628588933	0.932039001363628	-3.6400007845741
Q14254	FLOT2	-0.111855671252257	3.38663829157729	-2.7196807937515	0.0327714175974821	0.932039001363628	-3.64768926835211
Q8IXQ5	KLHL7	-0.183454345045129	3.19231622246611	-2.68334067194354	0.0344473502480438	0.932039001363628	-3.64771142057296
Q8N3Z6	ZCCHC7	-0.150826999755542	3.27895273389707	-2.47582456609425	0.04591966277421	0.932039001363628	-3.64850914627539
Q12906-7	ILF3	-0.0646142208447449	3.32522159569632	-3.56629323461094	0.0107712670863096	0.932039001363628	-3.65582062410373
Q13308-6	PTK7	-0.15452565031676	3.36983188927881	-2.85114114891946	0.0273967147656606	0.932039001363628	-3.65656291200453
Q96A33-1	CCDC47	-0.202353282963048	3.33619974830627	-2.61718442877409	0.0377355023634297	0.932039001363628	-3.65762620818878
Q63HK3	ZKSCAN2	-0.385907783967521	3.26399055611641	-2.38904855222003	0.0518459540749067	0.932039001363628	-3.65954194660702
P00387-3	CYB5R3	-0.14420742793806	3.37484279456052	-2.68961476656173	0.0341516380604823	0.932039001363628	-3.65962365589593
P83731	RPL24	0.187589435098497	3.292880244646	3.0204271689914	0.0218226172926252	0.932039001363628	-3.66524432239361
P20711-1	DDC	-0.0956273635287675	3.31473308411635	-2.66149796914072	0.0354981665402093	0.932039001363628	-3.67159683415933
P26373-1	RPL13	0.225309192433623	3.3108850589533	2.98039453935287	0.0230208364325527	0.932039001363628	-3.67472590264903
Q96DX7	TRIM44	-0.124565275689075	3.12770303493551	-2.57078095987748	0.0402384596540995	0.932039001363628	-3.67504674351568
P32418-4	SLC8A1	-0.179539629949224	3.36582837638506	-2.41841354369774	0.0497560749396586	0.932039001363628	-3.67965358084013
Q96KQ7-2	EHMT2	-0.0742129607163962	3.2740775913893	-3.06532010525687	0.0205582703447642	0.932039001363628	-3.68250551344464
P29374-1	ARID4A	-0.0999410784348268	3.31009695547456	-2.81436548490619	0.0287985521200605	0.932039001363628	-3.68365615000079
P46779	RPL28	0.234405894982031	3.32557371176647	3.00568953907813	0.0222557400618813	0.932039001363628	-3.68924809593648
Q8NFZ8	CADM4	-0.243366376002096	3.37795464161826	-2.46702331362296	0.0464871626864393	0.932039001363628	-3.68950408125021
Q96PD2-2	DCBLD2	-0.335607046436755	3.29795265074515	-2.4972317695995	0.0445693551643744	0.932039001363628	-3.69495622476518
P18621-3	RPL17-C18ORF32; RPL17	0.215212191174709	3.31179529178526	3.11848208321771	0.0191623281878707	0.932039001363628	-3.69574175718965
Q9H2H9	SLC38A1	-0.214422945521166	3.33737261027025	-2.42742439714086	0.0491325001263489	0.932039001363628	-3.69598755464163
P32119	PRDX2	0.208074530897093	3.37263099128327	2.96870333276116	0.0233839694841988	0.932039001363628	-3.7100052807067
Q9BVP2	GNL3	0.0699001450950924	3.33867242604274	3.00737124139129	0.0222058523876662	0.932039001363628	-3.71601354009806
P27635	RPL10	0.165790368790043	3.31827283752183	3.06782235294915	0.0204901605774959	0.932039001363628	-3.71644733312555
Q9ULH1-1	ASAP1	-0.0662059536628568	3.30877759697504	-2.87451538630161	0.0265437301530652	0.932039001363628	-3.71829053754036
Q13740-1	ALCAM	-0.169260026799859	3.36475840829783	-2.70677676998855	0.0333564089213091	0.932039001363628	-3.72071118582639
Q9BTV4	TMEM43	-0.260211644014633	3.34450405361922	-2.56594073649863	0.0405094198284944	0.932039001363628	-3.72226039029573
Q9NZM3	ITSN2	-0.111833438134075	3.3297047895721	-2.46022939054455	0.0469302377636962	0.932039001363628	-3.72532045902128
Q8N556-2	AFAP1	-0.0938650967136373	3.29907098276766	-2.65161415148448	0.0359847525475058	0.932039001363628	-3.73807528650045
O75781	PALM	-0.17256522511656	3.32095052636732	-2.49460564674883	0.044732744818996	0.932039001363628	-3.74012064650733
Q9UPT6	MAPK8IP3	-0.108791609516844	3.25836255830001	-2.63402122910238	0.0368683806185294	0.932039001363628	-3.74173607350705
Q9Y6M5	SLC30A1	-0.181767458433793	3.33215117777145	-2.29927697355348	0.0588178697222242	0.932039001363628	-3.7419135957284
Q9Y5Y0	FLVCR1	-0.244165574656129	3.34504320502115	-2.28661324636114	0.0598766338529801	0.932039001363628	-3.75227814130795
P55201-2	BRPF1	-0.109417230779298	3.29161222246749	-2.72935130310795	0.0323401526716913	0.932039001363628	-3.75840173827082
Q6UW68	TMEM205	-0.265052237342779	3.31594643602309	-2.34860078221719	0.0548748601910335	0.932039001363628	-3.76003706811975
P46527	CDKN1B	0.19096523324384	2.224707364133	2.44452082473425	0.0479716515165198	0.932039001363628	-3.76202743189598
P30085-1	CMPK1	0.101410081014596	3.31790746101725	2.74291917923542	0.031745208254167	0.932039001363628	-3.77436169726474
P30825	SLC7A1	-0.205703264820144	3.2952907374425	-2.29915881651922	0.0588276586750459	0.932039001363628	-3.77680508996899
P46778	RPL21	0.203631358652703	3.33414740657064	2.96298616904561	0.02356378237555	0.932039001363628	-3.77839191767415
P05067-1	APP	-0.0809225453766995	3.30525944329875	-2.72920541004666	0.0323466139672329	0.932039001363628	-3.77847740881424
Q8NE01	CNNM3	-0.183682378243128	3.33346370435915	-2.42357252278454	0.0493980585215599	0.932039001363628	-3.7802880793455
Q15392	DHCR24	-0.225236113032528	3.32233981734339	-2.34655683763358	0.0550327023595566	0.932039001363628	-3.78265591369763
Q13356	PPIL2	-0.0755740576645478	3.28395015089216	-3.01044336485181	0.0221150282519538	0.932039001363628	-3.78322512749996
Q9BY67-3	CADM1	-0.205783652365885	3.32544398962515	-2.46977459712425	0.0463089785175289	0.932039001363628	-3.79501050738075
Q8N3R9-1	MPP5	-0.0921767430262437	3.31748400318949	-2.66426222066223	0.0353633291621914	0.932039001363628	-3.80123353024772
P60880	SNAP25	-0.206150122272989	3.2767169341546	-2.26738820619731	0.0615216158253367	0.932039001363628	-3.80335894591713
P22087	FBL	-0.0641582234119567	3.31515225260348	-3.12015527326652	0.0191200890998627	0.932039001363628	-3.80460902915726
Q8NG11-1	TSPAN14	-0.215824386814833	3.35113580068938	-2.25670542788582	0.0624557010853535	0.932039001363628	-3.8058167630973
Q6PJG2	ELMSAN1	-0.0998967445007781	3.26641913106568	-2.64864523794381	0.0361322867976992	0.932039001363628	-3.8213470278251
Q9NPJ3-1	ACOT13	0.120403321112042	3.27261734737194	2.51938421824657	0.0432157100693297	0.932039001363628	-3.82419105070441
Q02224	CENPE	-0.0834299487587578	3.31995713828999	-2.89218346248608	0.0259178360714977	0.932039001363628	-3.8245390210759
P42766	RPL35	0.246998566763418	3.31764167432328	2.62754858100489	0.0371992180588308	0.932039001363628	-3.83337778556155
Q13895	BYSL	-0.152127952516179	3.30426425408754	-2.79990520795617	0.0293705420394471	0.932039001363628	-3.8350621234621
Q9NP97	DYNLRB1	0.481437402116067	3.30255591241517	2.64881871562661	0.0361236486122769	0.932039001363628	-3.8364614586952
P61088	UBE2N	0.115748601104145	3.36723827702876	2.80810067797047	0.0290448912275596	0.932039001363628	-3.83646707192013
P07919	UQCRH	0.240578339341123	3.41088299094229	2.23147328678697	0.0647202209666014	0.932039001363628	-3.84018259422126
Q16595-1	FXN	0.280906075698752	3.28951296437873	2.30562898931451	0.0582940889328954	0.932039001363628	-3.84328398304131
Q9BX68	HINT2	0.487153645935065	3.19002608246935	2.3933944727078	0.0515309959735521	0.932039001363628	-3.84457620913251
Q14165	MLEC	-0.227647781924351	3.36520853871996	-2.30544261286753	0.0583093886415968	0.932039001363628	-3.84529245536941
Q92854-1	SEMA4D	-0.166577534164227	3.35940197248118	-2.21420818347779	0.0663180746014378	0.932039001363628	-3.84683043302862
O75531	BANF1	0.364316490268209	3.28372054666056	2.21965164594291	0.0658099778457818	0.932039001363628	-3.85075863948005
Q9BX67	JAM3	-0.224280345795431	3.38519216539543	-2.40998254144131	0.0503469820166891	0.932039001363628	-3.85107359522874
Q969I6	SLC38A4	-0.219639145052088	3.3791870534528	-2.21264661953238	0.0664645719097421	0.932039001363628	-3.85318978953388
Q9H9B1	EHMT1	-0.0763863197630153	3.31508494731089	-2.99291187987579	0.0226387499211784	0.932039001363628	-3.85529145647911
Q9Y4X4-1	KLF12	-0.228291572172178	3.28587946485231	-2.19171334334707	0.0684606773034115	0.932039001363628	-3.85539001443913
Q9H8H3	METTL7A	-0.178507792565352	3.43115889634538	-2.25236098327491	0.0628397288185707	0.932039001363628	-3.85746085161289
Q9UBQ6	EXTL2	-0.191422094476327	3.37896860997579	-2.3163994260162	0.0574169388547664	0.932039001363628	-3.85858631571395
P56199	ITGA1	-0.192414263656404	3.37007620216577	-2.59250799797995	0.0390454377059094	0.932039001363628	-3.86183074763161
Q9UGP8	SEC63	-0.20834560366939	3.35616473257437	-2.63683033995081	0.0367257658964885	0.932039001363628	-3.86240742290325
Q03164-3	KMT2A; MLL	-0.159177676352545	3.34330069990375	-2.28725338043621	0.0598226464719168	0.932039001363628	-3.86378559747466
Q9NRY2-1	INIP	0.546041006529257	3.27289418501517	2.21214420621237	0.0665117759278979	0.932039001363628	-3.86732755431498
Q15058	KIF14	-0.114571324698159	3.32588594490986	-2.8161385182567	0.0287292395956837	0.932039001363628	-3.86805900674204
P18583-5	SON	-0.0613275477593392	3.30905072611885	-3.15380539440669	0.0182916270262389	0.932039001363628	-3.86832038817428
Q8N0Y2-1	ZNF444	-0.187125264800182	3.22093307061797	-2.21468058492765	0.066273821637158	0.932039001363628	-3.86901803755107
P00533-1	EGFR	-0.147016097622306	3.36578251305841	-2.67712612674354	0.0347429293180335	0.932039001363628	-3.87286901637684
Q5TB80	KIAA1009; CEP162	-0.173869370993067	3.28246311672268	-2.39953138257494	0.0510896219414928	0.932039001363628	-3.8818262341872
O43242	PSMD3	0.0986254696459594	3.33563681282696	3.04854054685783	0.0210213554532237	0.932039001363628	-3.88665328916988
O75448	MED24	0.120363939804781	3.33521437996931	2.45470549723116	0.0472937343030551	0.932039001363628	-3.88832406705111
Q8IUR0	TRAPPC5	-0.226904010287881	3.28225522782862	-2.26455385532385	0.0617680388020705	0.932039001363628	-3.89129036555879
P49773	HINT1	0.175858598193322	3.34499080913401	2.86601772469137	0.0268505006544121	0.932039001363628	-3.89351135117396
Q8IWU5-1	SULF2	-0.145455405910022	3.38460627713131	-2.47452448497272	0.0460030336387004	0.932039001363628	-3.90330174022233
O43447	PPIH	0.133030850735846	3.36576893481131	2.72133003545608	0.0326974387497769	0.932039001363628	-3.90342024595285
O60671-1	RAD1	-0.147502452110152	3.30251358881107	-2.18688969032231	0.0689292596146326	0.932039001363628	-3.90681014530928
Q8N4S0	CCDC82	-0.147137987691712	3.30416303694934	-2.20213799938681	0.0674590806967303	0.932039001363628	-3.91153245030019
P84098	RPL19	0.174411591165408	3.30084173713002	2.76749024343528	0.0306971770326321	0.932039001363628	-3.91859570230916
Q9NUU7	DDX19A	0.0844766460335102	3.33895226603082	2.98267487197857	0.022950717194836	0.932039001363628	-3.92157437675014
O14880	MGST3	-0.288224030512746	3.39549546772853	-2.11605193500484	0.0761994213173069	0.932039001363628	-3.92159002240932
P62081	RPS7	0.109591906474122	3.34851389222865	2.80208204150498	0.0292836668247791	0.932039001363628	-3.92680113281847
O75973	C1QL1	-0.188821350357204	3.37457780024419	-2.12754277238402	0.0749691675236396	0.932039001363628	-3.92742267869613
Q9UBE0-1	SAE1	0.15574765849516	3.3413851685869	2.99826205366686	0.0224775228870571	0.932039001363628	-3.9279127203413
P53671	LIMK2	-0.188788666606592	3.30906969449565	-2.10835645302694	0.0770347553687011	0.932039001363628	-3.92933288029307
Q17R31-3	TATDN3	-0.265477342212897	3.27005022822073	-2.10429263544813	0.0774796142478793	0.932039001363628	-3.93398662469088
P10606	COX5B	0.593710790191067	3.32116897154494	2.44249975749841	0.0481073795007649	0.932039001363628	-3.93880458304768
Q9NPD8	UBE2T	0.0789759168571919	3.3759703231811	2.7050891437785	0.0334337306972994	0.932039001363628	-3.93925935677812
Q9BVC6	TMEM109	-0.175778514882694	3.36398473683696	-2.13247235798221	0.0744475829641182	0.932039001363628	-3.93937102627373
Q96BT3-1	CENPT	-0.194076317559936	3.28314222775127	-2.27366707973903	0.060979314178807	0.932039001363628	-3.93979723875328
O43298	ZBTB43	-0.230243660745578	3.26597305742314	-2.1051842857505	0.0773817846028787	0.932039001363628	-3.94433817342374
P06756	ITGAV	-0.173727188911888	3.35738010875703	-2.6035974717466	0.0384509276568035	0.932039001363628	-3.94922408359318
Q4VC05-2	BCL7A	-0.113871752025652	3.30401074496378	-2.57795514425251	0.0398403428043453	0.932039001363628	-3.95209728404733
Q9BWH2	FUNDC2	-0.226391768942023	3.33292616436114	-2.15426949447764	0.0721851214036447	0.932039001363628	-3.95912198632236
Q6P2D0-1	ZFP1	-0.225041303511457	3.28840206618134	-2.08570697493682	0.0795475256342945	0.932039001363628	-3.95920698403643
Q9NP80-1	PNPLA8	-0.161543583909326	3.33918732695123	-2.12889335521519	0.0748258985805864	0.932039001363628	-3.96076265942722
P05026	ATP1B1	-0.172693598562659	3.34889664801755	-2.39603765071449	0.0513404117054831	0.932039001363628	-3.9665257898373
Q96RT1-8	ERBB2IP; ERBIN	-0.15870091936363	3.3524161178488	-2.49061559562911	0.0449821945189377	0.932039001363628	-3.96946969402512
Q9UK76	HN1; JPT1	0.243795544686314	3.33903651955589	2.64267155106468	0.0364310771933307	0.932039001363628	-3.97049275335506
Q9NPA0	EMC7	-0.220352209061876	3.38226633373374	-2.25613700672088	0.0625058093791507	0.932039001363628	-3.97112096944601
Q8TCJ2	STT3B	-0.150175878705633	3.36511970548682	-2.2240399242841	0.0654032752555244	0.932039001363628	-3.9712339511765
Q01804-1	OTUD4	-0.091975599587766	3.29649971501062	-2.56652379886898	0.0404766780843079	0.932039001363628	-3.97565304820858
P50402	EMD	-0.179296323966875	3.33904638242904	-2.27256451275582	0.0610741849842447	0.932039001363628	-3.97729211794775
P84095	RHOG	-0.11003499992602	3.35884235092971	-2.32788257213699	0.0564967414491022	0.932039001363628	-3.97756540994903
Q9H4I2	ZHX3	-0.162430946425372	3.29025100910982	-2.28934812098118	0.0596463312482522	0.932039001363628	-3.98237095894792
P13861	PRKAR2A	0.0673060679490783	3.33153693471985	2.69233169391284	0.0340244183816111	0.932039001363628	-3.9830110931829
Q8N9M1-1	C19orf47	-0.128198517446688	3.33008080018241	-2.28690005806834	0.0598524386359603	0.932039001363628	-3.99368871080461
P00505	GOT2	0.131429486796001	3.30675316518095	2.9811940515022	0.022996225608629	0.932039001363628	-3.99420032750325
P18433	PTPRA	-0.223154139039365	3.33725393211029	-2.04427391757789	0.0843604301791587	0.932039001363628	-3.99643932453024
O15169	AXIN1	-0.213597569557493	3.25325195371194	-2.0283799339201	0.0862835889398697	0.932039001363628	-4.00426649314041
A6NDB9	PALM3	-0.296870282557708	3.35191210152028	-2.0672727405924	0.0816536977256715	0.932039001363628	-4.00467747172601
Q9H0E9-2	BRD8	-0.0613790528335944	3.31633848355039	-2.62903333189606	0.037123051823231	0.932039001363628	-4.00726136045602
Q9UPS8-3	ANKRD26	-0.1051039617734	3.35652173689374	-2.34662304458981	0.0550275822176046	0.932039001363628	-4.00945477012196
Q92804-1	TAF15	-0.0945030375436495	3.32033542954938	-2.60647113853282	0.038298430550795	0.932039001363628	-4.01044479414954
Q8NFQ8	TOR1AIP2	-0.213671954953934	3.32003978882021	-2.02350871954849	0.0868817757057316	0.932039001363628	-4.02009836518114
P30305-1	CDC25B	0.10743779668929	2.7634285287503	2.34483027905529	0.055166400691128	0.932039001363628	-4.02201638204857
P35612-1	ADD2	-0.0782133053118926	3.31641874894042	-2.85101366396034	0.0274014465376533	0.932039001363628	-4.02297343663918
Q15545	TAF7	-0.0824346144406532	3.31566705610683	-2.5843321115933	0.0394899441221947	0.932039001363628	-4.02342740768281
P07315	CRYGC	0.287647469444118	3.38469537063331	2.04563174032837	0.0841981469077724	0.932039001363628	-4.02887195305407
P60468	SEC61B	-0.223773336222996	3.39244154721368	-2.08682489332267	0.0794215786575319	0.932039001363628	-4.03095722459002
Q9H5Y7	SLITRK6	-0.150104597739493	3.43440202263214	-2.39736457208706	0.0512450112984072	0.932039001363628	-4.03749745145327
Q9UBW7	ZMYM2	-0.168256476038486	3.29759607197007	-2.93701637428541	0.0243994589601009	0.932039001363628	-4.0381225172341
Q01101	INSM1	-0.145990599443612	3.01600922992143	-2.09007553058789	0.0790564991675159	0.932039001363628	-4.04335386195898
O75582-1	RPS6KA5	0.15754261306489	3.28060816312659	2.07278261186147	0.0810183447728059	0.932039001363628	-4.04412083269967
Q67FW5	B3GNTL1	-0.299225535000059	3.27255586830059	-2.02418780610609	0.0867981345269262	0.932039001363628	-4.04680382540008
Q96KR7-1	PHACTR3	-0.185490807064532	3.29038202934185	-2.10739139766049	0.0771401634911873	0.932039001363628	-4.04916668579023
Q00013-1	MPP1	-0.108130211123703	3.33961605466596	-2.22543726471671	0.0652743117680135	0.932039001363628	-4.05145030131203
P35240-2	NF2	-0.0958347693917452	3.34478301668446	-2.3394832138672	0.0555825938157576	0.932039001363628	-4.05345699923045
Q9BV19	C1orf50	0.359751363773	3.30760607783342	2.29155622763131	0.0594610533961938	0.932039001363628	-4.0558211644609
Q99496	RNF2	-0.153334733960833	3.31300547655363	-2.52109809378662	0.0431127930395105	0.932039001363628	-4.05660377355021
Q14964	RAB39A	-0.119254694940573	3.33233983830495	-2.14431509536422	0.0732095494943296	0.932039001363628	-4.0588852657077
Q49A88-1	CCDC14	-0.119293250471201	3.27452513802584	-2.34048422781008	0.055504432683318	0.932039001363628	-4.06982041875207
P55196-5	MLLT4; AFDN	-0.0521035536051956	3.31212492278969	-2.848640356162	0.0274896945483411	0.932039001363628	-4.07017732597645
Q5VWN6-1	FAM208B	-0.0501391693849527	3.25061727147489	-2.75572148188641	0.0311944858019768	0.932039001363628	-4.07364885496431
P62910	RPL32	0.117774586203606	3.34266751048695	2.91305714255431	0.025198671154989	0.932039001363628	-4.07778115016584
O75818-1	RPP40	-0.145529905954411	3.3212216863513	-2.35585569252589	0.0543183786594188	0.932039001363628	-4.080454715865
Q9Y608-4	LRRFIP2	-0.069479351801071	3.30684559812088	-2.42292125504783	0.0494431061202332	0.932039001363628	-4.08251343194023
Q14643-1	ITPR1	-0.135040261967265	3.32240168050601	-2.25531546415346	0.0625783041824644	0.932039001363628	-4.08411853115069
Q8WW35	TCTEX1D2	-0.303085711405983	3.29529048495253	-2.05463807454722	0.083129659813353	0.932039001363628	-4.08670087206098
Q8NDX6	ZNF740	-0.166426580344463	3.31519396206055	-2.24094024528447	0.0638608716432424	0.932039001363628	-4.08767582608108
Q8TEU8	WFIKKN2	-0.169242717327554	3.39419040182312	-1.9692998911589	0.0938257495307973	0.932039001363628	-4.08905015821374
Q9P2K2	TXNDC16	-0.315879232429162	3.34045465395368	-2.00642405407362	0.0890128609658288	0.932039001363628	-4.091260532838
P62266	RPS23	0.219633984855812	3.32236792103474	2.46917642914987	0.0463476575041509	0.932039001363628	-4.09135518054882
Q6NYC8	PPP1R18	-0.0699080268259393	3.31852485710999	-2.55357255361739	0.041210549769369	0.932039001363628	-4.09748518601643
Q9NZ01-1	TECR	-0.331980288261423	3.33250947344757	-2.19877040315724	0.0677809901823784	0.932039001363628	-4.10014742576026
P08247	SYP	-0.15624993120017	3.30420145038943	-2.01761908680048	0.0876105866916987	0.932039001363628	-4.10028404279833
P62847-4	RPS24	0.229231074811291	3.33619603378844	2.81348267445174	0.0288331299646452	0.932039001363628	-4.10414529390966
P33552	CKS2	0.447700576720298	3.35809274065153	2.13119360566731	0.0745825289737526	0.932039001363628	-4.1066999258615
P62277	RPS13	0.245081208889325	3.34724935740777	2.65725308039941	0.0357062872562062	0.932039001363628	-4.11023456161891
O94919	ENDOD1	-0.180688610123996	3.33870212374143	-1.96869622029019	0.0939061221341276	0.932039001363628	-4.11049063025466
Q9NQ66-1	PLCB1	-0.116256851195429	3.30280806312336	-2.26810222158187	0.061459697721604	0.932039001363628	-4.11679219783481
Q96LT9	RNPC3	-0.12832892329177	3.2944911737847	-2.38152603950451	0.0523958591369245	0.932039001363628	-4.11703128570344
Q8N5K1	CISD2	-0.152315948544905	3.35953504080969	-2.31061802636698	0.0578860726309739	0.932039001363628	-4.11845103910748
Q02878	RPL6	0.187639398587592	3.32741705517984	3.03520804674435	0.0213973230403694	0.932039001363628	-4.12366288116084
P11233	RALA	-0.171182694047678	3.37225027045689	-2.44459861705149	0.0479664352356439	0.932039001363628	-4.12388636716493
Q9Y5Z4-1	HEBP2	0.196976628972987	3.32330553952145	2.41239549267335	0.0501771225824281	0.932039001363628	-4.12430619112964
Q7L3B6	CDC37L1	-0.19506782419925	3.28217432651441	-1.90267229554353	0.103122888492487	0.932039001363628	-4.12513102806002
Q8IWE5	PLEKHM2	-0.0805121427884497	3.28213290218537	-2.33537453721303	0.0559046017785657	0.932039001363628	-4.12923916767812
Q13541	EIF4EBP1	0.182867329927899	3.29528595391344	2.11879629146528	0.0759037510685498	0.932039001363628	-4.12955346794246
O95758-4	PTBP3	0.138637192835943	3.35971833173541	2.08509034802388	0.0796170824406312	0.932039001363628	-4.12989170607318
P62750	RPL23A	0.135167257791388	3.3125711379302	2.90440024082824	0.025494301478359	0.932039001363628	-4.13798507904452
Q86WW8	COA5	-0.320359887159344	3.34658349022407	-2.00760438809019	0.0888639592114402	0.932039001363628	-4.14251164459224
P23769-1	GATA2	-0.127097168495215	3.33420663890687	-2.2785592856653	0.0605601877937816	0.932039001363628	-4.14853158830472
P50914	RPL14	0.26112841125519	3.29885727864262	2.28604403415018	0.0599246819980151	0.932039001363628	-4.14901635080443
Q9Y3E1	HDGFRP3; HDGFL3	-0.15197382682693	3.2892620146914	-2.29767815411635	0.058950469564752	0.932039001363628	-4.1491538998337
O15217	GSTA4	0.0938422030093163	3.31330088831444	2.33186842474731	0.0561809103581953	0.932039001363628	-4.15254419485304
P39023	RPL3	0.150715416125343	3.32113517769887	3.06284257306651	0.0206259479818925	0.932039001363628	-4.15342389131033
Q9BXK1	KLF16	-0.125345649024909	3.26633411944279	-2.13067528661383	0.0746372976013912	0.932039001363628	-4.15501146696406
Q96EL3	MRPL53	0.129506062399191	3.2626144415569	2.01104526163809	0.0884313082927016	0.932039001363628	-4.15526908669311
Q9BVC3	DSCC1	-0.10609124611199	3.29686354251671	-2.34640600924472	0.0550443685756177	0.932039001363628	-4.1573946824174
P05423	POLR3D	-0.0993173706684993	3.31294473653233	-2.46939589551093	0.0463334623615833	0.932039001363628	-4.16170787270424
Q8IY95	TMEM192	-0.300216812295145	3.34060224607191	-2.06041648081748	0.0824513274104337	0.932039001363628	-4.16256590482393
Q9BWP8-10	COLEC11	-0.233241105376401	3.34968542359874	-1.85120317928447	0.110924132505645	0.932039001363628	-4.16461935664536
Q9H7C9-1	AAMDC	0.146536598617744	3.29623745056439	2.14901575226998	0.0727239650848949	0.932039001363628	-4.16831717010587
Q13443	ADAM9	-0.102875491158113	3.32767641954357	-2.16394745836609	0.0712031253516773	0.932039001363628	-4.1685812538373
Q5JRA6-1	MIA3	-0.115687790512607	3.35967787782598	-2.26762382327468	0.0615011764575264	0.932039001363628	-4.17195310628066
P08183	ABCB1	-0.125974275302097	3.34342699374197	-2.34307193175024	0.0553029061031014	0.932039001363628	-4.17239504196157
P17612	PRKACA	-0.333248881383657	3.29711210793794	-2.36119140223943	0.0539128396530235	0.932039001363628	-4.18261835174673
Q9Y2G5	POFUT2	-0.155190101987573	3.35286634767973	-2.15260810759291	0.072355078954764	0.932039001363628	-4.18307300879797
P38117	ETFB	0.173077378379757	3.28860604703934	2.45634345643438	0.0471856439429353	0.932039001363628	-4.18460054285007
Q8NBT2	SPC24	0.191374737561082	3.33644983478182	2.42637143067223	0.0492049464576919	0.932039001363628	-4.18529920376743
O14757	CHEK1	0.13652536961683	3.29609513486063	2.28985602443784	0.0596036614757538	0.932039001363628	-4.19502306171997
P01892	HLA-A; LOC100507703	-0.126984545682274	3.33406441185327	-2.09227196333255	0.0788107784950133	0.932039001363628	-4.19631292799297
P54132	BLM	-0.065082852702772	3.32807210860511	-2.44905814373997	0.047668392981251	0.932039001363628	-4.20827129216391
Q96RP9	GFM1	0.105887711491749	3.27765339591928	2.63408042508009	0.0368653692967984	0.932039001363628	-4.20833540237733
P0CG29	GSTT2	0.22232325741808	3.34725614521058	2.30277984809753	0.0585284287870979	0.932039001363628	-4.20955339630328
O14672	ADAM10	-0.137573003739128	3.37632378683196	-2.31743385371586	0.0573334146528627	0.932039001363628	-4.21032638571738
Q9H2Y7	ZFP106; ZNF106	-0.0829762192526635	3.19144860839842	-2.27568354456406	0.0608061986638786	0.932039001363628	-4.2126230655312
Q9H307	PNN	-0.0687169767815616	3.32476794869275	-2.83597752855411	0.0279657011844635	0.932039001363628	-4.21400077827325
Q5T5U3	ARHGAP21	-0.100487304407733	3.29557815095266	-2.27384841648039	0.0609637255111295	0.932039001363628	-4.21733030145926
P17252	PRKCA	0.0652068168652574	3.33677375629434	2.40554406138555	0.0506609916939737	0.932039001363628	-4.21838797100659
P52569-3	SLC7A2	-0.222680316232681	3.37385696612994	-1.78143848968065	0.122430008393758	0.932039001363628	-4.22166509464667
P04899-4	GNAI2	-0.158297820930959	3.37495867070018	-2.34874861509197	0.0548634620886246	0.932039001363628	-4.221822515756
O43488	AKR7A2	0.128129643379477	3.37418939364316	2.27431928989853	0.0609232658768446	0.932039001363628	-4.22406251587561
P57682	KLF3	-0.135442687848643	3.2854837652631	-1.95125643955435	0.0962579168423899	0.932039001363628	-4.22595980972381
O94832	MYO1D	-0.143379339852978	3.33346753268129	-1.89951381374715	0.103585620376401	0.932039001363628	-4.22688495439001
Q16832	DDR2	-0.0844287498339426	3.33346554343698	-2.2613721783382	0.0620458679042701	0.932039001363628	-4.22979221133324
Q92585	MAML1	-0.130222444305081	3.24490299488784	-2.09208656002442	0.0788314901704481	0.932039001363628	-4.23182194327635
P08069	IGF1R	-0.149790242425746	3.33748381482987	-1.99241893280293	0.090798824824548	0.932039001363628	-4.23761058545544
P14649	MYL6B	0.121270488220436	3.36185701471869	2.50440406611425	0.04412629035112	0.932039001363628	-4.23958530688667
Q9Y394	DHRS7	-0.172823414994009	3.37036047628092	-1.8112141417088	0.117383210583534	0.932039001363628	-4.24523244586055
Q92925-1	SMARCD2	-0.0631606392535978	3.32429761801883	-2.46893716370188	0.0463631384322969	0.932039001363628	-4.24941891502844
Q92624	APPBP2	0.239404403295117	3.16003861240886	2.08076132250789	0.0801071388605432	0.932039001363628	-4.24992301752068
Q8TB61	SLC35B2	-0.221856269958142	3.31064275296151	-2.02702893134665	0.086449076855984	0.932039001363628	-4.25687435383005
Q96HD1-2	CRELD1	-0.151976816144908	3.35825938637731	-1.84669166285706	0.11163502431566	0.932039001363628	-4.260224336911
P46977	STT3A	-0.209715817669282	3.35378370793598	-1.9722842637635	0.0934294179897801	0.932039001363628	-4.26157038457899
Q12955	ANK3	-0.0927138316590207	3.31136998384737	-2.67977402841119	0.0346166616809231	0.932039001363628	-4.26359289638924
Q9ULF5	SLC39A10	-0.184631645252306	3.33414812281291	-2.1683029142555	0.070765638732236	0.932039001363628	-4.2637322360478
Q6ZNA4-3	RNF111	-0.150153065920179	3.32486074118762	-1.79680051905986	0.119800373892194	0.932039001363628	-4.27085861802356
P32297	CHRNA3	-0.200389994137504	3.42624307704261	-1.9373888476093	0.0981697687698734	0.932039001363628	-4.27520759468277
Q9NZQ3-1	NCKIPSD	-0.311484692294456	3.21205953881915	-1.77790277086881	0.123043151991806	0.932039001363628	-4.27851957630598
Q5JTV8-3	TOR1AIP1	-0.347397695073334	3.36091181653719	-2.07085304746018	0.0812402767081861	0.932039001363628	-4.27949644243086
Q14197	ICT1; MRPL58	0.111148469463228	3.25980004787832	2.19488576282062	0.0681542745169364	0.932039001363628	-4.27996211669135
Q8WXE0-1	CASKIN2	0.0812049784522598	3.33562761711187	2.35039954294183	0.0547363398289642	0.932039001363628	-4.28224596555144
P33527-9	ABCC1	-0.119962266233052	3.35591526278369	-2.23035378627261	0.064822622869253	0.932039001363628	-4.28281270590788
P52294	KPNA1	0.101454887824395	3.34140307540287	2.2826195437716	0.060214588043822	0.932039001363628	-4.28435172469911
Q96FJ2	DYNLL2	0.154625691623176	3.36233395790689	2.02334256747512	0.086902252505422	0.932039001363628	-4.28442822028876
P35268	RPL22	0.204933699300245	3.36434238193208	2.45761998196739	0.0471015836537209	0.932039001363628	-4.28717015074445
P68402-1	PAFAH1B2	0.0952565562550718	3.35786176874468	2.20554215606922	0.0671352645281683	0.932039001363628	-4.28808860920056
Q5JTH9-1	RRP12	0.0674442096178153	3.32907722540598	2.61510616931157	0.0378440182965686	0.932039001363628	-4.29047156021316
O75382-1	TRIM3	-0.06331969796623	3.32237158351973	-2.41560821449221	0.0499518880776569	0.932039001363628	-4.29240630947742
O94952-2	FBXO21	-0.105521991015074	3.13964482018359	-2.13437038921725	0.0742477417675588	0.932039001363628	-4.29259056750999
O60907	TBL1X	0.117602948214948	3.34901112447023	2.17921753607139	0.0696813072355158	0.932039001363628	-4.29285385398074
O75132	ZBED4	-0.113016778600811	3.24496948964317	-2.0899497166308	0.0790705977384138	0.932039001363628	-4.30311686098485
O95470	SGPL1	-0.114427392032941	3.35000791867502	-2.02413075840329	0.0868051578207028	0.932039001363628	-4.30634549088805
Q96QD8	SLC38A2	-0.155030311585899	3.4391920270898	-1.95226062989081	0.0961209214897101	0.932039001363628	-4.30649603289127
Q8TC12	RDH11	-0.134453683870182	3.37761640561729	-2.05398339847878	0.0832068665648975	0.932039001363628	-4.30704198613201
Q96JJ7-1	TMX3	-0.217221876010096	3.36078443614351	-1.68948948232289	0.139378982866972	0.932039001363628	-4.30784406463608
Q9BWD1	ACAT2	0.229705496328577	3.37774220709156	2.31045385614644	0.0578994518999762	0.932039001363628	-4.30952261975549
Q9BV57	ADI1	0.126723998109539	3.41453201311328	2.21768065300379	0.0659934899673911	0.932039001363628	-4.31252072279899
P82914	MRPS15	0.273031643596468	3.30014835212655	2.00746416959752	0.088881635013995	0.932039001363628	-4.31370039749014
Q8WX92	COBRA1; NELFB	0.0922769669338196	3.31359682208506	2.52730346346042	0.0427423088691337	0.932039001363628	-4.31672568482263
P15880	RPS2	0.13674368090898	3.32176793763382	2.75027862882466	0.031427372658959	0.932039001363628	-4.3191860217321
P80723	BASP1	-0.360274005178618	3.31828894211599	-2.53236408332558	0.0424426423135459	0.932039001363628	-4.32236131234556
Q1RMZ1	C7orf60; BMT2	-0.200616031338179	3.29511655039927	-1.72737612840138	0.132137460347994	0.932039001363628	-4.32396292226218
Q9BQ95	ECSIT	0.11933317778815	3.29722550104358	1.94653855734664	0.0969041533897686	0.932039001363628	-4.32404393150344
Q99963-3	SH3GL3	-0.113560129201801	3.29388779324131	-1.96908120939994	0.0938548568413771	0.932039001363628	-4.3240481959598
Q6ZVM7	TOM1L2	-0.118683981732324	3.33246985031301	-2.05812752353347	0.0827193605948336	0.932039001363628	-4.32983362898689
P78310-1	CXADR	-0.153448279257563	3.37576324699234	-2.22914243459136	0.0649336135520195	0.932039001363628	-4.33022847379059
O43716	GATC	0.19225553906069	3.30997101490622	1.7743806676108	0.123656902707749	0.932039001363628	-4.33744403731411
Q8NBM4-1	UBAC2	-0.124737881122696	3.31947783107457	-1.89157376614138	0.104757960566993	0.932039001363628	-4.33867372248963
P52943	CRIP2	0.123603552967855	3.33616490776688	2.15663719671559	0.0719436105496747	0.932039001363628	-4.33959874686861
O95989	NUDT3	0.0640813773908765	3.36662641636362	2.23267568680527	0.0646104208157252	0.932039001363628	-4.34268674804466
Q9BRQ8-1	AIFM2	-0.0897471202985843	3.28221477637037	-2.01898315631548	0.0874412462792433	0.932039001363628	-4.34509773979165
O95391	SLU7	-0.108725923041588	3.30737693738476	-2.47629040459662	0.0458898281790512	0.932039001363628	-4.34713535577196
Q8NB25-1	FAM184A	-0.093575994274111	3.31360458175014	-2.03416306491813	0.0855787868051858	0.932039001363628	-4.35033982145487
Q9NVV4	MTPAP	0.159784112880409	3.27109875144884	1.80287520780103	0.118775783266818	0.932039001363628	-4.35381294359098
P48509	CD151	-0.274762541181777	3.30101390581457	-1.90737812278858	0.102437254578335	0.932039001363628	-4.35507568579795
Q8NCD3-1	HJURP	-0.103763619186124	3.25390426271148	-1.92050284521052	0.100548759358929	0.932039001363628	-4.35536321434581
Q5TC82-1	RC3H1	-0.0698757006032485	3.33274464589694	-2.18840515251444	0.0687816919139562	0.932039001363628	-4.35738065239705
Q9BYI3-3	FAM126A	-0.126475324332341	3.33587086567765	-1.7830658954351	0.122148793113573	0.932039001363628	-4.3600640004304
P40429	RPL13A	0.195359800115692	3.28415413910777	2.61756319321911	0.0377157606237401	0.932039001363628	-4.36081946311182
Q8IYL3	C1orf174	-0.117460384467934	3.27939190263663	-2.01333141195511	0.0881450188470374	0.932039001363628	-4.36612991378288
Q8NB15-1	ZNF511	-0.118548192795295	3.24335846230362	-1.86272255668596	0.109129116905455	0.932039001363628	-4.3695712295538
Q8IWE4	DCUN1D3	-0.195634325636174	3.35605806526188	-1.62371609060234	0.152861923991507	0.932039001363628	-4.36957834999522
P07108-5	DBI	0.392197703411222	3.38666075191381	2.21050467168929	0.0666660563962311	0.932039001363628	-4.37267329799171
Q15223	PVRL1; NECTIN1	-0.189346117471462	3.32065897936674	-1.64806008719823	0.147732838818488	0.932039001363628	-4.37308729486013
P82675	MRPS5	0.284210612915115	3.27752561042504	1.85453481837626	0.110402014267073	0.932039001363628	-4.37376864083854
P04844-1	RPN2	-0.177985652488233	3.38402603264514	-2.11930077638125	0.0758495258049538	0.932039001363628	-4.3747895202587
Q9P032	NDUFAF4	0.246705048754996	3.27942560533455	1.92422977078856	0.100018817559774	0.932039001363628	-4.37654510677503
Q674X7-1	KAZN	-0.121817687301424	3.3040270768788	-1.80362486225316	0.118649936601378	0.932039001363628	-4.37750109092664
Q8N6N7	ACBD7	0.351196508605518	3.29107999853341	1.79839380101713	0.119530811086016	0.932039001363628	-4.38119786054319
P13987	CD59	0.206556869689214	3.36127423710259	2.01515202992357	0.0879176918239468	0.932039001363628	-4.38298529013777
Q9P0T7	TMEM9	-0.202817520080656	3.31964579370133	-1.57353226013184	0.163971918758095	0.932039001363628	-4.38452656523254
Q9HCU0	CD248	-0.208806463573482	3.38252893947135	-1.56806410568245	0.16522740268174	0.932039001363628	-4.38624644400331
Q8WVC6-1	DCAKD	-0.112292658732675	3.34584977145089	-1.86361086201147	0.108991888827444	0.932039001363628	-4.38902485384849
P41223	BUD31	0.141217435112799	3.38753039326369	1.99815022896048	0.0900636616408234	0.932039001363628	-4.39133381904489
Q86V48-1	LUZP1	-0.0678613969328513	3.32781749415501	-2.34743837803023	0.0549645684783979	0.932039001363628	-4.39385597483439
Q9H173	SIL1	-0.193153339465848	3.35835856009117	-1.7266320619153	0.132276125761769	0.932039001363628	-4.3943797607402
Q9BQF6	SENP7	-0.0860725688476308	3.29368658800983	-2.06795065190281	0.0815752561859682	0.932039001363628	-4.39643058759733
Q08380	LGALS3BP	-0.192898470194103	3.32549179872982	-1.79182530249763	0.120645936979032	0.932039001363628	-4.39667253885336
Q00059	TFAM	0.170873279069321	3.27538603099449	2.15270191115853	0.0723454721448944	0.932039001363628	-4.3970566653155
Q5VV67-1	PPRC1	0.201403167187098	3.06806954449059	1.54792388402757	0.169929710667395	0.932039001363628	-4.39932616091578
Q9HCN8	SDF2L1	-0.217290919532691	3.35136675373323	-2.00846886569075	0.0887550618059573	0.932039001363628	-4.40122985223925
Q96JB3-1	HIC2	-0.113135583472609	3.2922484564857	-2.04165575946451	0.0846742342340498	0.932039001363628	-4.40266924062701
Q9C0H5-2	ARHGAP39	-0.13590411550151	3.26930230104966	-1.69848704803195	0.137625444320155	0.932039001363628	-4.40648026884224
Q9Y5W9	SNX11	-0.115283254673472	3.31361130229697	-1.9226314277707	0.100245750215824	0.932039001363628	-4.40796434927301
Q96EY4	TMA16	0.285090441218608	3.33010183903921	2.09502567106478	0.0785038048711751	0.932039001363628	-4.40830867004431
P51826-2	AFF3	-0.416661428205773	3.02341717143349	-1.85740870353145	0.109953574404379	0.932039001363628	-4.40985917416189
O95864	FADS2	-0.18029373015394	3.34657180313827	-2.00949787557378	0.0886256127458988	0.932039001363628	-4.41191998639008
P30519	HMOX2	-0.204557870780624	3.35171953711528	-2.04552353288938	0.0842110680385595	0.932039001363628	-4.41293618433286
Q15375-1	EPHA7	-0.117662819538688	3.34713900815365	-1.8798044395059	0.106519840364855	0.932039001363628	-4.41337363548912
Q13029	PRDM2	-0.230782832114531	3.28611150531457	-1.65724424248582	0.145840684913328	0.932039001363628	-4.41469279190229
Q9BTT6	LRRC1	-0.160102575205539	3.30568581208637	-1.64661866304063	0.148031921181437	0.932039001363628	-4.41517082821849
Q15043	SLC39A14	-0.1174427896498	3.34244649554301	-1.88842294071403	0.105226801958755	0.932039001363628	-4.41541306491744
O15211	RGL2	-0.0988185577932755	3.31544883067767	-1.86211437566582	0.109223168589721	0.932039001363628	-4.41612909341549
Q9H3H1	TRIT1	0.166914086839073	3.31646252169856	1.69773128242894	0.137771917270127	0.932039001363628	-4.41614914995346
Q8TDR0-1	TRAF3IP1	-0.12525092420771	3.28266942036502	-1.85350118201508	0.110563741728476	0.932039001363628	-4.41750569854974
O95249-1	GOSR1	0.126515641562261	3.36650285769799	1.79780629523989	0.11963014058893	0.932039001363628	-4.41786062696226
Q6P9B6	KIAA1609; TLDC1	-0.0784256633608394	3.34795260424512	-2.21567150242705	0.0661810940030678	0.932039001363628	-4.41913554889123
Q9BSJ6	FAM64A; PIMREG	-0.056440712505605	3.31585803008663	-2.29540535464943	0.0591394972557253	0.932039001363628	-4.42038050822624
O43639	NCK2	-0.0697061218867252	3.32371472146723	-2.26557943755178	0.0616787561078542	0.932039001363628	-4.42091090808709
Q9H939-1	PSTPIP2	-0.190981996503689	3.27908363079706	-1.64994608719982	0.147342379838155	0.932039001363628	-4.42447387243223
P07954	FH	0.113657601777823	3.32485744584497	2.44168968852057	0.048161893300984	0.932039001363628	-4.42650296700187
Q9Y639-2	NPTN	-0.188580805956139	3.37772452425469	-1.88629607842726	0.105544448978913	0.932039001363628	-4.42788349106525
Q9BYN0	SRXN1	0.265712066469869	2.99740229881126	1.77410051168383	0.123705849368442	0.932039001363628	-4.42868434543559
O15234	CASC3	-0.0974417279096806	3.32021808745818	-1.93655534200181	0.098285875120632	0.932039001363628	-4.42913469970164
Q8NB49-1	ATP11C	-0.103148613407175	3.33360264515009	-1.96654687640918	0.0941928432152584	0.932039001363628	-4.42996907778451
P01137	TGFB1	-0.228480022625298	3.35003675995716	-1.80052145387989	0.1191717619207	0.932039001363628	-4.43071036784686
O60462-1	NRP2	-0.0942964053971792	3.36527820608692	-2.08260361758849	0.0798982150869082	0.932039001363628	-4.43185582812534
P52565-1	ARHGDIA	0.0582420048942668	3.33537987383752	2.63331585302609	0.0369042833539916	0.932039001363628	-4.43354229661081
Q9BPY3	FAM118B	0.254953992075406	3.38423715415421	2.09822440586552	0.0781487393630579	0.932039001363628	-4.43464747906651
Q9H1E3	NUCKS1	-0.25283224789292	3.31199540535399	-2.44104224464678	0.0482055095001317	0.932039001363628	-4.43465908525831
Q8WWH5	TRUB1	0.057773681696152	3.32885733795479	2.3432173176637	0.0552916061464172	0.932039001363628	-4.43565983892874
P23142	FBLN1	-0.214597502533512	3.31884693338341	-1.93646893051125	0.0982979199429236	0.932039001363628	-4.4358381462155
Q96LX8	ZNF597	-0.145078104804414	3.3006701959193	-1.65347585881384	0.146614250438097	0.932039001363628	-4.43760467846111
Q9UNH7-1	SNX6	0.0778938900105962	3.34773951548114	2.35853509622536	0.0541143378794674	0.932039001363628	-4.43770962977452
Q7Z7K6-3	CENPV	-0.108503028380944	3.32501060587771	-2.30261824429581	0.0585417496662233	0.932039001363628	-4.4385831996262
Q13428-4	TCOF1	-0.0819360439750686	3.2957617224754	-2.71968047448116	0.0327714319359406	0.932039001363628	-4.4393151176831
Q4KMQ2-2	ANO6	-0.125540825199449	3.37627034375699	-2.27529665007823	0.0608393746973865	0.932039001363628	-4.44053634168571
P21926	CD9	-0.233020920793452	3.38454793970891	-2.12760135041167	0.0749629478324899	0.932039001363628	-4.44232910941562
P38936	CDKN1A	0.309572998674526	2.56786371085442	1.47351435662226	0.188404897119641	0.932039001363628	-4.44375320330316
O75386-2	TULP3	-0.116785590884252	3.31230524456312	-1.70724686273296	0.135938607141769	0.932039001363628	-4.44754487960225
O14933	UBE2L6	0.179738732385602	3.37819021347845	1.75528495417092	0.127036568931574	0.932039001363628	-4.44767314557512
Q9H4G0-2	EPB41L1	-0.0971722754741736	3.35385014865786	-2.15155315784811	0.0724632101274345	0.932039001363628	-4.4503872038383
O75489	NDUFS3	0.215672393077167	3.37153825345509	2.05321788116828	0.0832972365637294	0.932039001363628	-4.45095129505816
P35222	CTNNB1	-0.123837764991268	3.07464701137257	-2.54778901730113	0.0415427714364941	0.932039001363628	-4.45181925385383
Q96JA3	PLEKHA8	-0.129101101019647	3.28669084362737	-1.75217649073011	0.127595133643722	0.932039001363628	-4.45194231007793
Q9H490	PIGU	-0.216598688911537	3.34673502255003	-1.55546139875962	0.168155384750113	0.932039001363628	-4.45221618854002
Q9Y673	ALG5	-0.110824564486153	3.3522365628132	-2.00013505719406	0.0898104555019442	0.932039001363628	-4.46253266329715
P40426-1	PBX3	-0.105997745617127	3.28563554957805	-1.88054566245109	0.106408020771903	0.932039001363628	-4.46257134567495
Q53RE8	ANKRD39	0.242390600291062	3.32396897201624	1.58390019137997	0.161616017047082	0.932039001363628	-4.46289865733
Q9NP58	ABCB6	-0.213084744085298	3.32768280326632	-1.71909929264436	0.133687869536795	0.932039001363628	-4.46313030886175
Q9Y320	TMX2	-0.191054758732755	3.32582553293883	-1.75562098899445	0.126976328398087	0.932039001363628	-4.46363423862512
Q15532	SS18	0.658066544553969	3.12003951867631	1.91919779919237	0.100734984924702	0.932039001363628	-4.46429851666488
Q9NTJ4-4	MAN2C1	-0.0965957147515525	3.3237787363212	-1.83480085058635	0.113530190085964	0.932039001363628	-4.46792957579139
O75348	ATP6V1G1	0.360511718542433	3.23822194140288	1.84373557857409	0.112103246855114	0.932039001363628	-4.46841007137751
Q7L9B9	EEPD1	-0.146036132853849	3.26233393289572	-1.74539258381412	0.128822416049308	0.932039001363628	-4.47033528029685
P49590	HARS2	0.243898998434076	3.26726478836453	1.81413155751287	0.116899788728905	0.932039001363628	-4.47190904001192
P05114	HMGN1	-0.325224782308894	3.28848575338194	-2.16554780490975	0.0710420581857142	0.932039001363628	-4.47226423721699
P51151	RAB9A	-0.115212637126435	3.34710645764664	-1.68907856097299	0.139459577121083	0.932039001363628	-4.47238316647703
Q15696	ZRSR2	-0.0894630213060276	3.31679876005064	-1.90347538391273	0.103005558853871	0.932039001363628	-4.473881181776
P30304	CDC25A	0.335566199606485	1.9043385981265	1.41310706272025	0.204744624977812	0.932039001363628	-4.4740668588123
Q8N5Y2-1	MSL3	-0.0651242874214274	3.30316922382103	-2.1798914193575	0.0696149170982843	0.932039001363628	-4.47470971168722
A8MW92	PHF20L1	-0.0859535938082549	3.30195072447952	-2.10861890618125	0.0770061141791029	0.932039001363628	-4.47646027812162
Q14596-1	NBR1	-0.0702780279344789	3.36331476155262	-2.02229351593933	0.0870316508910206	0.932039001363628	-4.47887617752524
Q9Y6M4-2	CSNK1G3	-0.129192745602508	3.35198667504931	-2.00793577188851	0.0888221992997732	0.932039001363628	-4.48211754403062
P56179-3	DLX6	-0.136686442563896	3.26235491270874	-1.70108213485075	0.137123634968373	0.932039001363628	-4.48219312273522
Q9Y5J1	UTP18	-0.0640420302846489	3.32636738500229	-2.36448084237064	0.0536643909798768	0.932039001363628	-4.4828203325373
Q5VW38	GPR107	-0.137020172882611	3.31215400987943	-1.86273080450121	0.109127841976367	0.932039001363628	-4.48837017219235
Q9H7E9-2	C8orf33	0.124711748084453	3.34049564389067	1.73723865507871	0.130312668516594	0.932039001363628	-4.48843267164703
Q9H165-1	BCL11A	-0.140087796187789	3.16142466834301	-1.65413964415933	0.146477706835139	0.932039001363628	-4.48948897674707
Q8N594-1	MPND	0.121024384988387	3.30741709941415	1.75225199556351	0.127581537910589	0.932039001363628	-4.49117997365679
Q05084	ICA1	-0.072048887232054	3.33400563550028	-2.33124577515943	0.0562301273592565	0.932039001363628	-4.4912537263736
Q9NW07	ZNF358	-0.116159757077852	3.28540765166024	-1.73959117627336	0.129881007796435	0.932039001363628	-4.4923770748766
Q8NBM8	PCYOX1L	-0.249693003261789	3.37908472520493	-1.65273587861014	0.146766610650586	0.932039001363628	-4.49496642073753
Q9NXE8	CWC25	-0.0799686572113699	3.29848725803993	-2.12857486136959	0.0748596591395777	0.932039001363628	-4.49550435133626
Q9Y6X4-1	FAM169A	-0.0612996996185657	3.33617585591396	-2.16510982189604	0.0710861021424029	0.932039001363628	-4.49728606577076
Q8NDF8-5	PAPD5	-0.0661744441369219	3.30441986398593	-2.11546616585313	0.0762626817164977	0.932039001363628	-4.49851285039963
P04216	THY1	-0.219607487138298	3.37164703798337	-1.72691784950865	0.13222284933369	0.932039001363628	-4.50203579412481
Q76I76	SSH2	-0.094769844934276	3.25771088244284	-1.80294322660406	0.118764359381347	0.932039001363628	-4.50474412851593
Q9UHG3	PCYOX1	-0.260998604127844	3.37911877251395	-1.86629430553493	0.10857837319836	0.932039001363628	-4.50482830728136
P17706-1	PTPN2	-0.0842321368924471	3.3422868720128	-2.17096380978899	0.0704997120580989	0.932039001363628	-4.50598611296563
Q9Y6B2-1	EID1	0.125443740592205	1.94135167598787	1.81095806626649	0.117425735962779	0.932039001363628	-4.50623813806716
P17980	PSMC3	0.0679641130285085	3.33887603237685	2.69632823474956	0.0338381925198587	0.932039001363628	-4.50664087061723
Q13627-2	DYRK1A	-0.0645322866686297	3.33250300069033	-2.27817981842764	0.0605925913099346	0.932039001363628	-4.5096217903479
Q9UHL9-3	GTF2IRD1	-0.160169854311399	3.20153250977216	-1.88725727756109	0.105400776742344	0.932039001363628	-4.50976060751808
Q96EP9	SLC10A4	-0.134640800740592	3.37308522453752	-1.72053269496807	0.133418116169441	0.932039001363628	-4.51039757675557
O75844	ZMPSTE24	-0.214250016796695	3.37481166678868	-1.83420429712844	0.113626096023919	0.932039001363628	-4.5113382070499
Q9BTK6	PAGR1	-0.142600513154241	3.31968857564509	-1.54582135686594	0.170427756714335	0.932039001363628	-4.5127049515237
A6NMB9	FIGNL2	-0.180866772029974	3.30799408043051	-1.55140081186788	0.16910908014463	0.932039001363628	-4.51300066497482
A0FGR8-6	ESYT2	-0.12040126081225	3.3319429401169	-1.86488078356736	0.108796002461708	0.932039001363628	-4.51498599060336
Q86W92-4	PPFIBP1	-0.0655771118164524	3.3196516751841	-2.37307143988672	0.0530211310931346	0.932039001363628	-4.52087633593894
Q96JN8-1	NEURL4	-0.0684955966600716	3.35156299437355	-2.15832607238196	0.07177184417584	0.932039001363628	-4.52653445256013
P15259	PGAM2	0.266178716018043	3.3347089455419	1.60386405780441	0.157169124812646	0.932039001363628	-4.52711953098969
Q9P2B7	KIAA1430; CFAP97	-0.135048530399408	3.25920634162213	-1.71405400915441	0.134641532054328	0.932039001363628	-4.52747883009092
P04843	RPN1	-0.166183913342485	3.37644753588932	-2.18601509078607	0.0690145705330472	0.932039001363628	-4.52993547449883
Q8NBU5	ATAD1	-0.244889417277758	3.32534949087958	-1.68098597044869	0.141055913138463	0.932039001363628	-4.5301219188572
Q9BQG0-2	MYBBP1A	0.0774282049821798	3.34393141651747	2.4873217454485	0.0451892154242679	0.932039001363628	-4.53034317752514
Q7L099-3	RUFY3	-0.0558151150555392	3.31501726596858	-2.33604227046079	0.0558521387443624	0.932039001363628	-4.53401420289489
Q9NW75-1	GPATCH2	-0.21779735069584	3.24722868572654	-1.88654943242019	0.105506560927688	0.932039001363628	-4.53521301048496
Q9UHP3-3	USP25	-0.146640004768214	3.29808781498527	-1.42620975146423	0.201094476651749	0.932039001363628	-4.53614907954033
Q14571-1	ITPR2	0.226019079291913	3.41261321690988	1.43703281493639	0.198124143359334	0.932039001363628	-4.536980174821
Q8TEA8	DTD1	0.234584824931725	3.33785609341445	1.96959217507679	0.0937868595751381	0.932039001363628	-4.53834653569189
Q9BTE0-2	NAT9	-0.189691796033774	3.29228950454795	-1.37864075766832	0.214634508019455	0.932039001363628	-4.54009876716966
Q8NFI3-1	ENGASE	0.168405399635657	3.34463516096544	1.36718051045838	0.218017062273806	0.932039001363628	-4.54010272772206
Q9BZV1	UBXN6	-0.094831858845889	3.33533874903185	-1.99086614757768	0.0909990348162816	0.932039001363628	-4.54192563695855
P17812	CTPS1	0.0723011554118759	3.35954243252596	2.57679154585729	0.0399046318001299	0.932039001363628	-4.54193445492586
Q92575	UBXN4	-0.106942289511032	3.33916491258919	-1.6851328934382	0.140235720698623	0.932039001363628	-4.54334983121738
Q9Y676	MRPS18B	0.14944773918825	3.2740352832096	1.82697025497883	0.114795427337386	0.932039001363628	-4.5442228014284
Q8IXK0-5	PHC2	-0.154329161647094	3.3315243707446	-2.17193281807772	0.0704031237172472	0.932039001363628	-4.54925685602981
Q96GP6-1	SCARF2	-0.125173629406503	3.3233890972689	-1.62062898690043	0.153524299760956	0.932039001363628	-4.55201318670827
P35226	BMI1; COMMD3-BMI1	-0.187852688226156	3.33579279850671	-1.73818024177114	0.130139731967308	0.932039001363628	-4.55300295168495
P07099	EPHX1	-0.153521883591754	3.35192483260721	-1.4491564520087	0.194844443643152	0.932039001363628	-4.55403491320626
P62851	RPS25	0.224538723895031	3.36273734692528	2.26248573077602	0.0619484849317802	0.932039001363628	-4.55421827576691
O94923	GLCE	-0.225743755140429	3.30602228024419	-1.47209982819015	0.188773447164836	0.932039001363628	-4.55640217374218
Q4VC44-2	FLYWCH1	-0.12437891078026	3.25663881610667	-1.67665998329817	0.141916415734651	0.932039001363628	-4.55701862521965
Q8TAE8	GADD45GIP1	0.12595272481175	3.24870921269102	1.82097456081977	0.115773513661023	0.932039001363628	-4.55734070299047
Q9P0I2	EMC3	-0.115915162396185	3.36643122358921	-1.81656612404247	0.116497866114848	0.932039001363628	-4.55761477015374
O95995	GAS8	-0.104505935953302	3.31084329560761	-1.76610222601583	0.125111213724915	0.932039001363628	-4.55943825773689
Q9NRP4	ACN9; SDHAF3	0.236777063278925	3.29154098190096	1.30624601295627	0.236814474991469	0.932039001363628	-4.56086723725761
Q9UM13	ANAPC10	-0.140747038476643	3.34684623303496	-1.91330807310071	0.101579690755156	0.932039001363628	-4.56195049165639
Q86U44	METTL3	0.0891132008396547	3.35040701473952	2.1377355937257	0.0738947621902508	0.932039001363628	-4.56237248617462
Q9Y6C2	EMILIN1	-0.136827546840824	3.32074961932413	-1.52006027178194	0.176641580528319	0.932039001363628	-4.56387395762938
Q8NHQ8-1	RASSF8	-0.130241106494884	3.32039718125926	-1.55759125619945	0.16765716716448	0.932039001363628	-4.56415326812195
O75051-1	PLXNA2	-0.175589792864537	3.3738891080414	-1.49792464657943	0.182148413190087	0.932039001363628	-4.56479818607589
Q92576-1	PHF3	-0.101342254737788	3.25763141148417	-2.45410257842167	0.0473335864646505	0.932039001363628	-4.56504079862788
Q96DA6	DNAJC19	0.145016993999747	3.27696206641408	2.01214987525481	0.0882928638136824	0.932039001363628	-4.56806407325284
O75820-1	ZNF189	-0.267309255988789	3.27886904329715	-1.33760785591499	0.226967151462345	0.932039001363628	-4.56834876337244
Q96RK4-2	BBS4	0.150974317615308	3.33277038187796	1.67491169242549	0.142265599957681	0.932039001363628	-4.56854342872678
P09601	HMOX1	-0.284491933552281	2.76439345250512	-1.32634796860676	0.230460064123292	0.932039001363628	-4.56864935758016
P49207	RPL34	0.182559928004565	3.31456178167529	2.05524485747688	0.0830581655941012	0.932039001363628	-4.56993259374987
O60427	FADS1	-0.173394207292771	3.35812676496403	-1.87488907603772	0.107264301467147	0.932039001363628	-4.57623600549101
Q5T9L3-2	WLS	-0.164681028314305	3.35879177758407	-1.42637761484786	0.201048099493339	0.932039001363628	-4.57669203758159
Q9HCL2	GPAM	-0.0913674285487484	3.20379409290527	-1.82726046772628	0.114748290348745	0.932039001363628	-4.57766168918239
P61353	RPL27	0.126237798156604	3.33321918823191	2.28003642562702	0.0604342214014001	0.932039001363628	-4.57902482071842
Q9ULH0-1	KIDINS220	-0.139063588197264	3.29634347937606	-1.58346125692837	0.161715107331434	0.932039001363628	-4.57906539670166
P24666-1	ACP1	0.0780391852156753	3.33056443834693	2.21835668656729	0.0659304879393631	0.932039001363628	-4.58300603215232
O15015-2	ZNF646	-0.174166092643975	3.28339946771946	-1.75202898590096	0.127621698062228	0.932039001363628	-4.58507644649711
P09486	SPARC	-0.146561951475625	3.34732148994911	-1.67165607849478	0.142918031288396	0.932039001363628	-4.58691937334034
Q86UU1-1	PHLDB1	-0.0727414484629177	3.33017034798911	-1.95959009404376	0.0951268716122537	0.932039001363628	-4.58785577156328
Q14534	SQLE	-0.120646164912547	3.29848190326018	-1.67738478704662	0.141771892056479	0.932039001363628	-4.5892093540703
P22694-1	PRKACB	-0.135249732837854	3.33185241654599	-1.48587361988269	0.185212800337108	0.932039001363628	-4.59159251778476
Q9Y248	GINS2	0.170426375858064	3.36568568495194	2.0367689335012	0.0852630977522169	0.932039001363628	-4.5930857764356
O60583	CCNT2	-0.0860888665652954	3.3065165847139	-2.02921020483797	0.0861820447240866	0.932039001363628	-4.5938250111586
Q9NRY5	FAM114A2	-0.0966938226716325	3.30477633612713	-2.32053829123933	0.0570835012520277	0.932039001363628	-4.59404056772816
Q15475	SIX1	-0.213234251282512	3.2928040512242	-1.55740732853948	0.167700137067974	0.932039001363628	-4.59528972675474
Q9Y487	ATP6V0A2	-0.12567580848687	3.34887428982181	-1.6680422701889	0.143645595099787	0.932039001363628	-4.59541398701165
P51149	RAB7A	-0.0943985558001332	3.34023876765068	-2.28524178453024	0.0599924686418374	0.932039001363628	-4.59554317884038
O43464	HTRA2	-0.166261629667288	3.40533559796559	-1.7057018747754	0.136234667840493	0.932039001363628	-4.59706206192279
Q9NSI2-1	FAM207A	-0.10184709544307	3.33891126500285	-1.67600792395429	0.142046554846917	0.932039001363628	-4.59722515841991
Q8N2K0-2	ABHD12	-0.114163205709919	3.31729150185289	-1.68742934628957	0.139783488351086	0.932039001363628	-4.59730314346122
Q63HQ0	AP1AR	0.117269347407823	3.33095398480757	1.68829035141686	0.139614294214668	0.932039001363628	-4.60174685195734
O14950	MYL12B; MYL12A	-0.213552248874426	3.31279624609646	-2.37380638569596	0.0529664712379487	0.932039001363628	-4.6046250017148
Q7Z434	MAVS	-0.135267383997984	3.28204490146523	-1.68420827231163	0.140418198677598	0.932039001363628	-4.60645705435327
Q9BRR0-1	ZKSCAN3	-0.214380419882458	3.25006559735492	-1.14168834486442	0.294824719735941	0.932039001363628	-4.60741275950962
Q9H467	CUEDC2	-0.100673875802291	3.25990667912896	-2.08701064959791	0.0794006705099208	0.932039001363628	-4.60796525866613
P31321	PRKAR1B	-0.148704085730644	3.21160079384857	-1.62678986598141	0.152205100240041	0.932039001363628	-4.60909981807426
Q8NDI1-2	EHBP1	-0.0697638718456352	3.29305864333934	-2.23406187761578	0.0644840742772478	0.932039001363628	-4.61002762509511
Q9BQE4	VIMP; SELENOS	-0.213462566220978	3.23303105915321	-1.39085356726499	0.21108185055445	0.932039001363628	-4.61129409117352
P16435	POR	-0.15631135186094	3.35380153856132	-2.10954066425749	0.0769056092994755	0.932039001363628	-4.61374452332622
Q8NFH3	NUP43	-0.065002376110647	3.3758775874988	-2.14469303897791	0.0731703858051555	0.932039001363628	-4.61654975557381
Q9NZM5	GLTSCR2; NOP53	0.102963027953406	3.2942113472524	1.95826601344594	0.0953056875525048	0.932039001363628	-4.61765384723935
Q9NZC3	GDE1	-0.119872206266495	3.34121516596637	-1.58353672891154	0.161698065319576	0.932039001363628	-4.61805155785899
Q02446	SP4	-0.118688767585126	3.29266860617541	-1.71168302216589	0.135091956774045	0.932039001363628	-4.61881686374771
P56556	NDUFA6	0.131697265122068	3.36248451231065	1.85581208241087	0.110202488930747	0.932039001363628	-4.61889026695755
Q5VV42	CDKAL1	-0.114560615222155	3.30897890857705	-1.66288392934563	0.144690250663207	0.932039001363628	-4.62048743422875
Q6ICG6-2	KIAA0930	-0.120816775784743	3.32621871165749	-1.59476111819771	0.159182274369692	0.932039001363628	-4.62234389860252
Q96TC7	FAM82A2; RMDN3	-0.122232657073496	3.3573982906689	-2.15910207914775	0.07169306077424	0.932039001363628	-4.62482245716715
Q9H9A5-6	CNOT10	-0.0714920433031169	3.30939896689538	-2.23646014010255	0.064266078764793	0.932039001363628	-4.62557679816473
Q7Z7K0	CMC1	-0.145275610602938	3.34201189957219	-1.59904210253793	0.158232506295238	0.932039001363628	-4.62696138637465
Q9C0E8-4	KIAA1715; LNPK	-0.173253768384353	3.34293964697338	-1.87648474182257	0.107022067693198	0.932039001363628	-4.62779641624014
Q3KQV3	ZNF792	-0.177570270645579	3.30065281124502	-1.18873555334503	0.277115832054614	0.932039001363628	-4.62904356330689
Q8WVJ2	NUDCD2	0.168487557174782	3.30083250072695	1.8753543536601	0.107193613138502	0.932039001363628	-4.62987575063656
Q96EH3	MALSU1	0.208170114451957	3.28069793125551	1.57173450874173	0.164383689597166	0.932039001363628	-4.63102036096044
Q86Y25	ZNF354C	-0.210292746742524	3.26830722162803	-1.28785438922576	0.242763125909845	0.932039001363628	-4.6315525693776
Q9HBM0-1	VEZT	-0.124909003888084	3.34430966240681	-1.41488088066767	0.204246978555425	0.932039001363628	-4.63256996502584
Q8IXM2-3	C17orf49	0.168904055467852	3.13867513877753	1.89208113878097	0.104682656889835	0.932039001363628	-4.63415073815395
Q9UN36-1	NDRG2	-0.086939041333729	3.28464246103606	-1.80655405386172	0.11815945145889	0.932039001363628	-4.634159780588
Q9NZU0	FLRT3	-0.122657101744903	3.44151822366154	-1.85631805641183	0.11012354725828	0.932039001363628	-4.63427907645558
Q05932-1	FPGS	0.118686331127425	3.34285215069182	1.76383080745908	0.125513138730718	0.932039001363628	-4.63478866311521
Q9NX01	TXNL4B	0.11119658473989	3.38476959019108	1.60329275129008	0.15729476123363	0.932039001363628	-4.63506686887312
O95478	NSA2	0.187617661236303	3.3590051548115	1.81790986986757	0.116276606166076	0.932039001363628	-4.63695010422715
Q00536-2	CDK16	-0.080889999986662	3.31491653889277	-1.80628634066522	0.118204196981153	0.932039001363628	-4.64019463990432
P47974	ZFP36L2	-0.0833555596382672	3.36455455471077	-1.77160853814568	0.124142056885012	0.932039001363628	-4.64171202051506
Q9Y5A6	ZSCAN21	-0.181502749704074	3.31263378135511	-1.49376501266514	0.183200810042834	0.932039001363628	-4.6431108322904
P35227	PCGF2	-0.109120701716702	3.31521132410238	-2.0474154378155	0.0839854415444173	0.932039001363628	-4.64321040102165
Q4VC05	BCL7A	-0.0892573976563838	3.31547616560182	-1.70033605158067	0.137267724049731	0.932039001363628	-4.64348314848285
Q8TEM1-1	NUP210	-0.216841539007504	3.40403640730363	-1.96982371106247	0.093756063875391	0.932039001363628	-4.64679137181147
Q15788	NCOA1	0.166729359982947	3.30699839376444	1.67962076247933	0.141326932288902	0.932039001363628	-4.64744180623951
Q9H0K1	SIK2	-0.132776255875201	3.33725412509659	-1.51069402942006	0.178952571852891	0.932039001363628	-4.64770930251667
Q6NVY1	HIBCH	0.109399310112054	3.26174748893686	2.00617878756354	0.0890438332355405	0.932039001363628	-4.65059342119124
Q15022	SUZ12	-0.0568309579426217	3.29550413477953	-2.19511353053396	0.0681323299230025	0.932039001363628	-4.65191360304369
Q96J01	THOC3	-0.104859533269583	3.33554906072766	-2.21057084700231	0.0666598222035188	0.932039001363628	-4.65227880511053
Q15796-1	SMAD2	0.107624897805784	3.37847980580427	1.58872084374635	0.16053149949605	0.932039001363628	-4.65330464844966
Q13424	SNTA1	0.217732395147321	3.36172327915294	1.45107815463064	0.194329163218975	0.932039001363628	-4.65352279241143
Q9C0D2-3	KIAA1731; CEP295	-0.0867442910080409	3.33632222434313	-1.87697012952557	0.10694848932071	0.932039001363628	-4.65372421738197
Q8WV99	ZFAND2B	-0.136513532336988	3.34997992506692	-1.55987952137837	0.167123434876349	0.932039001363628	-4.65429431349123
Q8NEB9	PIK3C3	0.126097844147092	3.32036705492706	2.11452992398493	0.0763639021369368	0.932039001363628	-4.6555816620909
Q8N3X6-1	LCORL	-0.08959916194284	3.29730157016388	-1.63860879114601	0.149704420651973	0.932039001363628	-4.65604697932033
Q9GZS1-2	POLR1E	-0.0754397625206442	3.30717734686902	-2.04052945352346	0.0848095906187398	0.932039001363628	-4.65691649303446
Q9NQ92	COPRS	-0.160097111856157	3.26580630171274	-1.4777030127429	0.187317437436368	0.932039001363628	-4.65912600956051
O15294	OGT	0.0835499484444919	3.33787564546246	2.46271797736045	0.0467674316388947	0.932039001363628	-4.6593325241358
P62241	RPS8	0.137547854112587	3.32649878705814	2.52632135335622	0.0428007215292967	0.932039001363628	-4.65964998169052
Q13948-2	CUX1	-0.139982985026134	3.33825986384347	-1.3097308270487	0.235701920596045	0.932039001363628	-4.66010796919412
Q8TCD5	NT5C	0.208002166366584	3.4042672308522	1.67579531283789	0.142089012813343	0.932039001363628	-4.66064827506294
Q96K76	USP47	0.124715522165363	3.31426675239784	2.41053075309692	0.050308338288894	0.932039001363628	-4.66071407549361
Q9Y697	NFS1	0.178321233252397	3.27060078817225	1.72965323813381	0.131713965474381	0.932039001363628	-4.66173323816903
Q9H8M5-1	CNNM2	-0.126131081797334	3.34649281317431	-1.32763398548745	0.230058730792971	0.932039001363628	-4.6642026723645
Q9H900-1	ZWILCH	-0.112072892461154	3.30638626617317	-2.13645751310286	0.0740286201118215	0.932039001363628	-4.66475544278789
P62745	RHOB	-0.156093498353649	3.33917682857018	-1.6851199444888	0.14023827466035	0.932039001363628	-4.66479105703907
Q66GS9-1	CEP135	-0.0671084285069879	3.28307253639313	-2.06628904768129	0.0817676567586796	0.932039001363628	-4.66524558826744
P15151-1	PVR	-0.171961783092473	3.38645568607194	-1.34912455387107	0.223443379474525	0.932039001363628	-4.67043470568433
Q6N022	TENM4	-0.157271115345571	3.40287172266928	-1.45835175994433	0.192390114714287	0.932039001363628	-4.67062227758341
O76003	GLRX3	0.0529050426964785	3.32442551185391	2.4515428988182	0.0475031685087829	0.932039001363628	-4.67068497996326
Q9BX70-1	BTBD2	-0.101675207838049	3.07357109354079	-1.58590077840059	0.161165104017132	0.932039001363628	-4.67068933616289
Q52MB2	C12orf68; CCDC184	-0.191319186921967	3.38307873093063	-1.11564123815281	0.305030663467022	0.932039001363628	-4.67165935140269
Q9HB21-1	PLEKHA1	-0.11555739363313	3.27527435358924	-1.61511435655922	0.154714302996045	0.932039001363628	-4.67181896603802
Q9GZT8-1	NIF3L1	0.131552587961386	3.38919215067985	1.92984972412376	0.0992249364938998	0.932039001363628	-4.67443493317469
Q96SK2	TMEM209	-0.160402510714137	3.36226045286008	-1.44338209508332	0.196400292385945	0.932039001363628	-4.67476040533788
P08754	GNAI3	-0.126462205638203	3.32735939519982	-1.85588101673514	0.110191730577679	0.932039001363628	-4.67524816245109
Q14914	PTGR1	0.108090660846082	3.34075038440912	1.99940817384454	0.0899031017903959	0.932039001363628	-4.67563226760414
Q9C0B5	ZDHHC5	-0.201609606094352	3.34660678733914	-1.5124841665868	0.178508722993899	0.932039001363628	-4.67723576882278
Q9H0Q3-1	FXYD6	-0.185411720888075	3.37085675831647	-1.51499028854868	0.177889067346544	0.932039001363628	-4.67757399847354
O00115	DNASE2	0.099376270550629	3.37757278189105	1.6040868333124	0.157120159783102	0.932039001363628	-4.67767669079629
O14980	XPO1	0.0755250710710348	3.33192179654015	2.71487861210342	0.0329878385501361	0.932039001363628	-4.67846868110759
O15126-1	SCAMP1	0.222279036901098	3.37249157939785	1.87714376082917	0.106922181220076	0.932039001363628	-4.67932526305793
Q9NR33	POLE4	0.163392740678356	3.24627869100754	1.85208676369265	0.110785425477704	0.932039001363628	-4.67934223792506
Q15370-2	TCEB2; ELOB	0.164619455184194	3.30382544083114	2.1309541303703	0.0746078282638015	0.932039001363628	-4.68079015904848
Q9UJ70-2	NAGK	0.0953730623561416	3.37568560478477	2.10195564612157	0.0777366175349928	0.932039001363628	-4.68142966337135
Q8N196	SIX5	-0.136165274999768	3.19188554063535	-1.24974305843264	0.255508047919952	0.932039001363628	-4.68739678946546
P42330	AKR1C3	0.106322233455436	3.11078317315525	1.62324825375185	0.15296212966418	0.932039001363628	-4.68828606058699
Q13114-1	TRAF3	-0.121656275579745	3.33786468294423	-1.37522451703164	0.215637863997185	0.932039001363628	-4.68899548936727
Q9UHQ9	CYB5R1	-0.14607575826	3.2827108723397	-1.51914523015114	0.176866127106508	0.932039001363628	-4.69338624913127
Q6N063-1	OGFOD2	-0.12649213141709	3.28584651501273	-1.30318135254896	0.237796717737733	0.932039001363628	-4.69411632179839
P54284	CACNB3	-0.108491355055874	3.32862158370231	-1.56180691638593	0.166675109815929	0.932039001363628	-4.69568623350287
Q9UBM7	DHCR7	-0.182942382640083	3.33914513779566	-1.60697200482099	0.156487312921959	0.932039001363628	-4.69731232066258
O75915	ARL6IP5	-0.149685114759299	3.32516955532363	-1.30823400673621	0.236179225842674	0.932039001363628	-4.69914272162593
Q9P0R6	GSKIP	0.271541899601689	3.23808455250326	1.61162302603078	0.155472206178911	0.932039001363628	-4.70200365399041
O75379-1	VAMP4	-0.161078189873888	3.32715391912714	-1.07543059787846	0.321359016427661	0.932039001363628	-4.70309291729272
O94901-9	SUN1	-0.145867437970636	3.31196711925306	-1.27520131865157	0.246931474968123	0.932039001363628	-4.70577681887175
P46934-4	NEDD4	-0.061986894393822	3.31645829510756	-1.962538982768	0.0947298272221589	0.932039001363628	-4.7059318123772
Q2KHM9-1	KIAA0753	-0.26860889440076	3.29768215527447	-1.61437879649086	0.154873688180488	0.932039001363628	-4.70606670180247
Q99435-3	NELL2	-0.11157031794235	3.33788338199776	-1.40383628245471	0.20736348204889	0.932039001363628	-4.70740041955513
Q562R1	ACTBL2	0.178253634245626	3.42449634764824	1.41514887502876	0.204171887971781	0.932039001363628	-4.70843585664095
P11309	PIM1	0.164034067456839	2.95442160959301	0.968543031729712	0.368223810933158	0.932039001363628	-4.70855554230575
Q9BRR3	TMEM246	-0.150874237248857	3.38353345728274	-1.26982677444761	0.24872089188189	0.932039001363628	-4.71000903491592
Q9H204	MED28	0.419397540402967	3.15332458373553	1.52859325787776	0.174560349439307	0.932039001363628	-4.71239541732908
Q15628	TRADD	-0.143479839812848	3.36818887416078	-1.05851333801237	0.328438975212984	0.932039001363628	-4.71374634681412
Q04760-1	GLO1	0.26046677309498	3.32104873468811	2.25661658587785	0.0624635300945547	0.932039001363628	-4.71432096114477
Q969J2	ZKSCAN4	-0.114417071248214	3.28187211648136	-1.70188367993195	0.13696899661495	0.932039001363628	-4.71639535552935
O14936	CASK	-0.0733145337008181	3.33943018596446	-2.33828576969624	0.0556762421733528	0.932039001363628	-4.71641986133075
Q16288-1	NTRK3	-0.15447842809859	3.32284040917136	-1.01968310703933	0.345166789912572	0.932039001363628	-4.71645704454682
Q8TF44	C2CD4C	-0.127596544091646	3.32897898155117	-1.2878449289872	0.242766219248948	0.932039001363628	-4.71874196154185
Q13387-1	MAPK8IP2	0.149791790296919	3.35985162337707	1.05182933541033	0.331270900569253	0.932039001363628	-4.71905250633293
Q93063-3	EXT2	-0.144068950816888	3.36644382871986	-1.12478454168726	0.30141510858508	0.932039001363628	-4.71932342727198
Q8WUN7	UBTD2	0.194738236953307	3.36626933913286	1.33599959225977	0.227463150452271	0.932039001363628	-4.72046987947322
Q9UKY7	CDV3	0.0682709425004308	3.34172218138476	2.34933104365415	0.0548185799478422	0.932039001363628	-4.72101360797984
Q9UI09	NDUFA12	0.254298683459778	3.30642750751058	1.78841564032869	0.121228781842236	0.932039001363628	-4.72209253306536
Q9H2A2-1	ALDH8A1	-0.138849339608374	3.39295183496358	-1.26355571245027	0.250823095911966	0.932039001363628	-4.72228762586422
Q96LD8	SENP8	0.172528426622953	3.34316706927699	1.33995846083245	0.226243940802241	0.932039001363628	-4.72308398032604
Q14934-2	NFATC4	-0.13133502323667	3.35374824687511	-1.53026780601068	0.174154607259591	0.932039001363628	-4.7231434487486
Q6DKI1	RPL7L1	0.135526883191535	3.30521264368461	1.84736700627214	0.111528324528461	0.932039001363628	-4.7235508022153
O60921	HUS1	-0.189750663969692	3.33849707667234	-1.46264040592486	0.191255143986495	0.932039001363628	-4.72473214156313
P49585	PCYT1A	0.0791674301315734	3.29999554193618	2.08860906451126	0.0792209876620329	0.932039001363628	-4.72570152430016
Q96AE7	TTC17	-0.172420406166751	3.37100140769586	-1.04063405062567	0.336058339055385	0.932039001363628	-4.72732866907924
Q68DH5	LMBRD2	-0.134071832885418	3.30716056035259	-1.37406258690076	0.215980084419135	0.932039001363628	-4.72758423700527
Q7L2Z9	CENPQ	-0.100039871891371	3.24836186997096	-1.96440993488384	0.0944787752895547	0.932039001363628	-4.72989433693082
Q6DKK2	TTC19	-0.1916777601528	3.31924212280912	-1.82405914315231	0.115269306726334	0.932039001363628	-4.7306704920684
Q99653	CHP1	0.116648617305027	3.36901083514302	1.81037587003659	0.117522474883111	0.932039001363628	-4.73210644983959
Q5EBM0-1	CMPK2	0.121715732663424	3.32267550284257	1.50124587274949	0.18131215205846	0.932039001363628	-4.73398892903917
O15370	SOX12	-0.0858225930570598	3.34290014293567	-1.66367971551306	0.144528617931817	0.932039001363628	-4.73490375634106
P54687	BCAT1	0.108712603942678	3.35401381615114	2.41114614785068	0.0502649955365488	0.932039001363628	-4.73650148698877
Q8NC96	NECAP1	0.172502631346877	3.34369627441878	1.42796296210533	0.200610580851268	0.932039001363628	-4.73659592261123
Q96SN8	CDK5RAP2	-0.0566773944233438	3.20135262550364	-2.31189674685874	0.0577819707573007	0.932039001363628	-4.73872016905061
P29323	EPHB2	-0.120050781914024	3.37899821644672	-1.91911690974584	0.100746538818212	0.932039001363628	-4.73977792093764
P35610	SOAT1	-0.122237840407073	3.37451359050085	-1.49285669417605	0.183431362882699	0.932039001363628	-4.74119550725114
Q8WV92	MITD1	0.135305691565387	3.39638559594431	1.24626942135971	0.256698119613254	0.932039001363628	-4.74160114316413
P61009	SPCS3	-0.232635266296014	3.3274593589994	-1.59238171401853	0.159712484633654	0.932039001363628	-4.742070253889
P26599-3	PTBP1	-0.0468219629596003	3.35339157482818	-2.65611971887365	0.0357620722244036	0.932039001363628	-4.74224078099588
Q8IXV7	KLHDC8B	-0.118198306124087	3.44111580859877	-1.22526076241746	0.263998428072606	0.932039001363628	-4.74291894893378
Q9BVC4	MLST8	-0.0917551688274669	3.35715375243358	-1.76590719982829	0.125145674313176	0.932039001363628	-4.74457726327705
P62753	RPS6	0.162596367175068	3.28982867492952	2.41475121235867	0.0500118669308444	0.932039001363628	-4.74540688841004
Q96F45	ZNF503	-0.121149628419702	3.39660836034998	-1.45926304009174	0.192148433045161	0.932039001363628	-4.74726529709237
Q9BRK4	LZTS2	-0.0762236359798616	3.34343852192508	-1.68460430530063	0.140340012018113	0.932039001363628	-4.74834419151303
Q9BVG9	PTDSS2	-0.153711536417278	3.36620774222295	-0.974158235573988	0.365634671519708	0.932039001363628	-4.74946687498631
Q9NRR6-1	INPP5E	-0.130952756773963	3.2788907535582	-1.33431073855918	0.227985041395007	0.932039001363628	-4.74972810012907
Q16739	UGCG	-0.131920434257355	3.32369934584975	-1.46891305540433	0.189606178864238	0.932039001363628	-4.75277450661359
Q6EEV4-1	POLR2M	0.248845157858985	3.30481303201493	1.201830802275	0.272350229362886	0.932039001363628	-4.75290584908042
Q12834	CDC20	-0.0986354829050054	3.33254956005985	-1.48952082868868	0.184280386069138	0.932039001363628	-4.75359815349757
P16615	ATP2A2	-0.191307644213918	3.33925942319442	-2.245725798905	0.0634309320062365	0.932039001363628	-4.75389279497785
Q8NC56-1	LEMD2	-0.119822413315276	3.35678381890136	-1.45407133073355	0.193529064380169	0.932039001363628	-4.7540455649414
P15374	UCHL3	0.141610743955954	3.32529724142629	2.25677737762361	0.0624493614095313	0.932039001363628	-4.75472181680166
P27348	YWHAQ	0.0685777551108892	3.31430676996947	2.4658245050185	0.0465650261593466	0.932039001363628	-4.75526692640344
P18074-1	ERCC2	0.0856835556443498	3.3420223861167	1.7102068432592	0.135373123837284	0.932039001363628	-4.75825916180208
P00367	GLUD1	0.0906638317975048	3.30242192819681	2.39239785599992	0.0516030468853125	0.932039001363628	-4.75855016543757
Q15599	SLC9A3R2	-0.0781575939684292	3.35663708788481	-1.67063390574619	0.143123466123456	0.932039001363628	-4.75862912823723
O15118	NPC1	-0.102881161315704	3.35842434180756	-1.57167100583985	0.164398252528848	0.932039001363628	-4.75911903521678
O60613-1	SEP15; SELENOF	-0.167659847756484	3.30329557503507	-1.24449985350162	0.257306220478451	0.932039001363628	-4.75968727284544
Q9BSQ5-1	CCM2	-0.08385539261976	3.32809356088136	-1.67390847681322	0.142466342073661	0.932039001363628	-4.76184575275828
Q9H0I2-1	ENKD1	-0.106322655993948	3.30220918397238	-1.41114745958317	0.205295672036471	0.932039001363628	-4.76273164867121
P18075	BMP7	-0.19168020640641	3.42211601191855	-1.49010708188989	0.184130914340701	0.932039001363628	-4.76308412736916
Q9Y679-1	AUP1	-0.117125396971615	3.34619003917374	-1.53589606323582	0.172797311114518	0.932039001363628	-4.76322766535568
O75864-1	PPP1R37	-0.180418413360161	3.36338377561772	-1.29653835363479	0.239938172226345	0.932039001363628	-4.76351295808545
Q92859	NEO1	-0.139553404213154	3.29530882506202	-1.51181552420355	0.17867438743322	0.932039001363628	-4.76379726362229
Q9UH99-2	SUN2	-0.165614835933684	3.34214333581839	-1.46000872968985	0.191950874961919	0.932039001363628	-4.76383249467499
Q9HDC9	APMAP	-0.142868089268954	3.39758948419819	-1.77600084977291	0.123374206086824	0.932039001363628	-4.76406605334136
Q86YI8	PHF13	-0.142787940105762	3.20597815707122	-1.34142846819079	0.22579270696177	0.932039001363628	-4.76452043072839
Q96IK1	BOD1	0.271288050548784	3.24563418850237	1.8285443790804	0.114539982006353	0.932039001363628	-4.76537076142191
Q9UH03-2	SEPT3	0.204497758519285	3.37423533541217	1.9447140823525	0.0971552184554855	0.932039001363628	-4.7654820126819
O43422-1	PRKRIR; THAP12	0.124063201231282	3.32475505487951	1.83852593565313	0.112933113198029	0.932039001363628	-4.76579898073816
Q5T481	RBM20	-0.0895142482288606	3.28099395845061	-1.47426664905202	0.188209159859973	0.932039001363628	-4.76646598140891
Q8NFJ9-2	DPP3; BBS1	-0.140066068568684	3.33998295706113	-0.703064713849142	0.506976833136019	0.936227241329345	-4.7665367209234
P48426	PIP4K2A	-0.08384383439858	3.32728344147185	-1.73947171261587	0.129902894660853	0.932039001363628	-4.76755470593287
P40926	MDH2	0.0768255106772758	3.28205820446485	2.40911890462505	0.0504079228635019	0.932039001363628	-4.7680304723709
P36955	SERPINF1	-0.197196503395798	3.36057965642073	-1.65581716078383	0.146133174222689	0.932039001363628	-4.76943450796719
P57768	SNX16	-0.0957825860915878	3.34425576961528	-1.63921761353463	0.149576667216926	0.932039001363628	-4.77022714108488
Q9BSJ8-2	ESYT1	-0.101569510052078	3.31998230920011	-2.08562213726868	0.0795570918563149	0.932039001363628	-4.77045359639029
Q9BRA0-2	LSMD1; NAA38	0.0989200122246973	3.32907855922266	1.60495857376222	0.15692869373369	0.932039001363628	-4.77124550204172
O95817	BAG3	0.166240876667307	3.30684767111359	1.70657067383526	0.136068106668383	0.932039001363628	-4.77269987970649
P61968	LMO4	-0.10017357057754	3.34664053622759	-1.69452398694355	0.138395181790195	0.932039001363628	-4.77310778814359
Q15699	ALX1	-0.21283256921795	3.32301183835914	-0.767557721048307	0.470336145317948	0.933352645533893	-4.77337966775821
Q5BKX5-1	C19orf54	0.136068467364622	3.36369109831863	1.30909328464384	0.235905115561464	0.932039001363628	-4.77449512589192
Q6IEE7	TMEM132E	-0.146444445278909	3.39831404085527	-1.12870628656561	0.299875277761162	0.932039001363628	-4.77542405831477
P78345	RPP38	0.11146134174356	3.31013295287007	1.3702168841785	0.217116231396908	0.932039001363628	-4.77725080438968
Q07065	CKAP4	-0.148590105897544	3.36680568876955	-2.31132052431313	0.0578288576574012	0.932039001363628	-4.77747175820632
P08195-4	SLC3A2	-0.144592238502506	3.31545807418965	-2.11364513662951	0.0764596847803207	0.932039001363628	-4.77755662866555
Q14739	LBR	-0.222508219276837	3.37489115103571	-1.83393514062558	0.113669393427492	0.932039001363628	-4.77848669271754
Q66K89	E4F1	-0.120229061585922	3.29298416566126	-1.21580895741506	0.267340766584364	0.932039001363628	-4.77859445747825
Q9H6J7-2	C11orf49	-0.235486277733265	3.22401921091368	-0.928252558861154	0.387220093478767	0.933352645533893	-4.77924111264859
Q99767-2	APBA2	-0.119764928644104	3.31304303272514	-1.88471908025765	0.105780584777532	0.932039001363628	-4.77959394500701
Q96G46	DUS3L	0.0740569429611359	3.32271640931681	1.95962733900305	0.0951218465492926	0.932039001363628	-4.77969727893917
Q8IWF2	FOXRED2	-0.154378528089587	3.35712707786165	-1.33699761576806	0.227155240108522	0.932039001363628	-4.78180386422985
Q9P1Y6-1	PHRF1	-0.0558163998636513	3.32125906440734	-2.02703577114154	0.0864482382289414	0.932039001363628	-4.7819428901299
Q9ULD4	BRPF3	-0.0684043689575438	3.3205228706053	-1.80163614733178	0.118984073590878	0.932039001363628	-4.78203717261272
P07093-3	SERPINE2	-0.121390088858589	3.24993637994007	-1.13800572757187	0.296250137512034	0.932039001363628	-4.78275082962788
Q9NVP2	ASF1B	-0.0907421427703018	3.29013568410078	-1.44278499863677	0.196561820703722	0.932039001363628	-4.78297162431218
A6NDG6	PGP	0.0569256545066793	3.33725179718128	2.00071171591692	0.0897370243751237	0.932039001363628	-4.78313349172767
Q9Y232-1	CDYL	-0.0610157077040104	3.30772660219876	-1.88033760501118	0.106439396257152	0.932039001363628	-4.78341243627505
Q13405	MRPL49	0.132342569744446	3.32334665678281	1.57496953939347	0.163643410211885	0.932039001363628	-4.78372195590054
Q9P2P5	HECW2	-0.0932343127378306	3.32607336659092	-1.54876980936995	0.169729711993736	0.932039001363628	-4.78411643844039
Q4LE39-1	ARID4B	-0.0658079931786867	3.30362659397433	-2.19843733019137	0.0678129139187039	0.932039001363628	-4.78412303993259
Q96AJ9-2	VTI1A	-0.136514756861851	3.30965119959412	-1.5917195572347	0.159860330976213	0.932039001363628	-4.78416821059895
P20674	COX5A	0.21877417456536	3.32222246452113	1.76192261660906	0.125851759141591	0.932039001363628	-4.78516233938043
Q9Y5J6	FXC1; TIMM10B	0.44544064540074	3.20516274661121	1.34004856150751	0.226216260393477	0.932039001363628	-4.7858145056439
Q15468-2	STIL	-0.0870656908805711	3.24403826816507	-1.48729298825443	0.184849420576099	0.932039001363628	-4.79063696962141
Q9Y4G2	PLEKHM1	0.141592707111215	3.41062739647734	1.22887998500747	0.262728155828371	0.932039001363628	-4.79100429024365
Q9BZQ6	EDEM3	-0.162389308543693	3.43628287586879	-0.99845380150463	0.354595780386706	0.932039001363628	-4.79582548683177
P61619	SEC61A1	-0.110517385321106	3.33908805866806	-0.421797665277493	0.687089772863069	0.959887803533645	-4.79661423488383
Q14160-3	SCRIB	-0.1035019978593	3.33663932952391	-2.05100237238235	0.0835593367228037	0.932039001363628	-4.79877299015
Q96CN5	LRRC45	-0.0864015654943511	3.22761439923832	-1.45304817912643	0.193802220716687	0.932039001363628	-4.7990800095494
O75396	SEC22B	-0.0973620316713062	3.36916636210021	-1.75390746032311	0.127283800066472	0.932039001363628	-4.80021196964191
Q8N5N7	MRPL50	0.398730011780784	3.22212911939174	1.6346676994652	0.150533918986444	0.932039001363628	-4.80046647989151
Q9P0U3-1	SENP1	-0.086845814776911	3.33254180802402	-1.75160302489015	0.127698440244505	0.932039001363628	-4.8009453703801
Q8TC92	ENOX1	-0.0738497420119568	3.30116076712092	-1.64545227711606	0.148274357419678	0.932039001363628	-4.80153359455987
Q7RTP6	MICAL3	-0.0617240080111667	3.26687596436474	-2.05159244882726	0.0834894481922082	0.932039001363628	-4.80166476282195
Q9C0A1	ZFHX2	0.126488792521518	3.32245629546754	1.08812034024857	0.316130390760399	0.932039001363628	-4.80216173258704
Q9HCC0-1	MCCC2	0.122167264653146	3.31179498288797	1.75701950967626	0.126725914621625	0.932039001363628	-4.80271639495766
Q5T5Y3-3	CAMSAP1	-0.0808650529083699	3.28527119456833	-2.16377267257026	0.0712207392157622	0.932039001363628	-4.80406993207074
Q9BYD1	MRPL13	0.215430735677754	3.37408632172709	1.58232649015694	0.161971548060433	0.932039001363628	-4.8051149517784
Q969G9	NKD1	0.0459997079288743	2.95139034886474	0.165551605881632	0.873658770735566	0.985723641910063	-4.80564785113648
Q14168-4	MPP2	-0.108162345579697	3.35963194299724	-1.96782009634334	0.0940228912552937	0.932039001363628	-4.80585102798798
P53384	NUBP1	0.0824285287820243	3.33489451811908	1.74180005496041	0.129476962283252	0.932039001363628	-4.80797722978671
Q8N183	NDUFAF2	0.196713075958229	3.30464165745087	1.98977877098072	0.0911394996438263	0.932039001363628	-4.80944740921684
P26992	CNTFR	-0.147851511706594	3.36199436833008	-1.32947528286407	0.229485188184511	0.932039001363628	-4.80976524495041
Q8IYB1	MB21D2	-0.0861411749829022	3.30728952071632	-0.371823657214808	0.722125289328806	0.959887803533645	-4.81128606590237
P62424	RPL7A	0.157661610097844	3.30254947631975	2.50033098353047	0.0443773342525395	0.932039001363628	-4.81173135298766
Q9P253	VPS18	0.123517293381156	3.35292604718878	2.01320011861026	0.0881614352372054	0.932039001363628	-4.81177190653982
Q9NWS9	ZNF446	-0.11692028914169	3.29850699384764	-1.10981937400267	0.307351495680182	0.932039001363628	-4.81431300001208
Q969Q5	RAB24	-0.101384309694233	3.28814882832353	-1.41229355468007	0.204973223157533	0.932039001363628	-4.81454661106627
Q9H0U4	RAB1B	-0.0710045629076087	3.31930155842885	-1.64065423346384	0.149275621973346	0.932039001363628	-4.81574010409988
Q7L5Y6-2	DET1	0.148745093985412	3.34662038966805	1.34020746077327	0.22616745127434	0.932039001363628	-4.81601513342431
P51955	NEK2	-0.11558568561312	3.18277973187209	-0.575113886984841	0.585014753267251	0.945185995875172	-4.81649098215927
Q13641	TPBG	-0.110680753804992	3.37887825055565	-1.22924934591817	0.262598814461457	0.932039001363628	-4.81691088828928
Q9BUU2-1	METTL22	-0.027571714924489	3.41066681505254	-0.114080460258606	0.912698262806215	0.989037778170583	-4.81794284710306
Q14232	EIF2B1	0.0699694999684503	3.33474461133792	2.27700623842421	0.0606929187740351	0.932039001363628	-4.8183640171522
P09012	SNRPA	-0.100096298268781	3.32058292712239	-2.18746008964564	0.0688736792494709	0.932039001363628	-4.81888157532721
Q9H609	ZNF576	-0.13352721149118	3.29613127252178	-0.864440233588266	0.418817491149161	0.933352645533893	-4.81941008868416
Q8N158	GPC2	-0.125623203362527	3.36306380295263	-1.40477120744512	0.207098010947689	0.932039001363628	-4.82053884700343
P32969	RPL9	0.0672765259073004	3.34855093649361	2.36106922537463	0.0539220904934667	0.932039001363628	-4.82129554303999
O43829	ZBTB14; ZFP161	-0.113215229441377	3.31111399604405	-1.52797820734812	0.174709596679965	0.932039001363628	-4.8222816069979
P05023	ATP1A1	-0.133819574405957	3.35229945373383	-2.48297578618444	0.0454638878010961	0.932039001363628	-4.82257983159302
Q9P2Y4	ZNF219	-0.130552626589426	3.29768319239128	-1.57708593549511	0.163160806146782	0.932039001363628	-4.82303606640949
Q9UKM7	MAN1B1	-0.0828817296699582	3.35501436199524	-1.61899911977214	0.153875103685015	0.932039001363628	-4.82426270127346
Q8IYQ7	THNSL1	0.117399737209362	3.2909204706686	1.39449458485651	0.210032999912067	0.932039001363628	-4.82442750829593
Q99811	PRRX2	-0.129783657406314	3.31372402220943	-1.07438363417958	0.321793538560554	0.932039001363628	-4.82484343253313
Q8WUY8	NAT14	-0.0925252756630505	3.3734509335174	-1.41671220180484	0.203734351353947	0.932039001363628	-4.8248811245542
Q9P2B2	PTGFRN	-0.16796263082149	3.41083526527213	-1.79185209945807	0.12064136715823	0.932039001363628	-4.82551308988351
Q7L211	ABHD13	-0.130687392073404	3.29667505639644	-0.88725570647083	0.407306879809393	0.933352645533893	-4.82660433917866
Q96NB1	FOPNL	-0.15601361480744	3.21472116278759	-1.43999832375591	0.197317286017016	0.932039001363628	-4.82688272873768
P09668	CTSH	-0.0795401351817121	3.36828719145769	-1.65762703697598	0.145762323798208	0.932039001363628	-4.8270651464299
Q9H8N7	ZNF395	-0.121084277784606	2.66376691860098	-0.821257405176459	0.441253606275018	0.933352645533893	-4.82767154464319
Q8IWD4-1	CCDC117	-0.191957777155066	3.27424438231366	-1.58831802074571	0.160621860839142	0.932039001363628	-4.82774292491865
Q8WUM9	SLC20A1	-0.112182095077887	3.32880600297372	-1.03584451203761	0.338123418278003	0.932039001363628	-4.82788585030793
Q9UBZ9	REV1	-0.0981732730027465	3.24829777311717	-0.473415395034271	0.65176511722665	0.95584681071337	-4.82811035776904
Q96JG8-4	MAGED4B; MAGED4	-0.0941206515683731	3.37706461882006	-1.7472662580081	0.12848231054819	0.932039001363628	-4.83049912476942
Q9NZH0	GPRC5B	-0.109948074243575	3.32062751082751	-1.10169847238525	0.310613183923071	0.932039001363628	-4.83326051092561
P50213-1	IDH3A	0.158110943998021	3.25243687008596	1.83437262438242	0.113599026563827	0.932039001363628	-4.83413057311706
Q9Y484-3	WDR45	0.0878206991239198	3.3577686184182	1.8554160408469	0.110264317847907	0.932039001363628	-4.83417932819049
Q8NI77	KIF18A	-0.0706406811983408	3.30419797311558	-1.74655088983719	0.128612060039949	0.932039001363628	-4.83425766604983
Q9P2W9	STX18	-0.135965301271268	3.35747978470774	-1.15030988707578	0.291510054130736	0.932039001363628	-4.83430260881534
Q8WUH6	C12orf23; TMEM263	-0.165739734312463	3.27588254767779	-1.85737256848887	0.109959201767114	0.932039001363628	-4.83523592525039
P30626-1	SRI	0.224989374681563	3.35313827176111	1.99235508855132	0.0908070479584069	0.932039001363628	-4.83673357535322
Q96GX2	ATXN7L3B	0.161771126520957	3.36011667547326	1.58018847193592	0.162455748586378	0.932039001363628	-4.83678350455328
Q9H7Z6	KAT8	-0.0696049428970834	3.30045369936009	-1.82817204001289	0.114600354038403	0.932039001363628	-4.83728326409791
P05388	RPLP0	-0.0696229592762007	3.34406119091254	-2.54402623298216	0.0417604247869715	0.932039001363628	-4.8377899091584
P23229-1	ITGA6	-0.135687655131926	3.36657155690586	-1.00361600820629	0.35228443806411	0.932039001363628	-4.83797369697374
Q96GA7	SDSL	-0.0990042318285477	3.31839120420029	-1.5169991157482	0.177393813221559	0.932039001363628	-4.83804243738391
Q9BT22	ALG1	-0.126592537563108	3.36424304828004	-1.31747843938726	0.233244961698334	0.932039001363628	-4.83866853685782
O14656	TOR1A	-0.167634066393234	3.38021681959406	-1.68015020015646	0.141221769943484	0.932039001363628	-4.83933461839597
A2RUC4	TYW5	0.204924021928771	3.41029645983225	1.17799124977888	0.281078699264355	0.932039001363628	-4.83958113940514
Q8TCN5	ZNF507	-0.0789837881767125	3.28225946707863	-1.52502668081658	0.175427463116984	0.932039001363628	-4.84034408946167
P10075	GLI4	0.125504071580803	3.29852933203308	1.21054341267068	0.269218475074519	0.932039001363628	-4.8409339789651
Q8WXB1-1	METTL21A	-0.106908479390715	3.34311256969897	-1.16455448883633	0.286102122411472	0.932039001363628	-4.84147727846073
Q8N6N3	C1orf52	-0.0978974149405295	3.3185335723868	-1.37164377369152	0.21669405674675	0.932039001363628	-4.84156465113501
Q9BVI4	NOC4L	-0.0961565750453023	3.35696762783134	-1.98942949425045	0.0911846644061736	0.932039001363628	-4.84180969320088
Q02535	ID3	0.335004186442465	3.31724521482481	1.09826121807893	0.312002298926739	0.932039001363628	-4.84337249073179
Q5JS54-2	PSMG4	0.10869097110323	3.39657126530126	1.61473891832442	0.154795635602164	0.932039001363628	-4.84349577754277
Q92791	LEPREL4; P3H4	-0.221725741139886	3.39555542648467	-1.64940822363287	0.147453633560199	0.932039001363628	-4.84364697112919
Q9UHC7	MKRN1	-0.173185058591941	3.28537660389045	-1.37162767483685	0.216698815811521	0.932039001363628	-4.84412841901835
Q99759-2	MAP3K3	-0.0748967100421375	3.33299230289862	-1.54713713375225	0.170115916436641	0.932039001363628	-4.84721378863225
P61604	HSPE1	0.255336096885749	3.26474098385898	2.35285531282557	0.0545478082169652	0.932039001363628	-4.84949947937923
Q92506	HSD17B8	0.105492134391239	3.20807965733496	0.621249030900456	0.556080533166132	0.938237112116112	-4.84950922842905
P04920-1	SLC4A2	-0.0966422272392633	3.15823411225395	-0.557140878743706	0.59652073046584	0.945551680059626	-4.84984151652855
Q9NRM2	ZNF277	-0.099046602552421	3.27779955154034	-1.32728040661354	0.230169011959573	0.932039001363628	-4.85073245751079
P24844-1	MYL9	-0.146798907854484	3.30010167438648	-1.06570539121895	0.325413734874001	0.932039001363628	-4.85189313450119
Q9UHN6-1	TMEM2	-0.0808266618761716	3.35150290722984	-1.67380763232423	0.142486535900837	0.932039001363628	-4.85397482140423
Q9UBT6	POLK	-0.104921009155436	3.26889349247437	-1.22831592834256	0.262925780951068	0.932039001363628	-4.85817904366276
P43897	TSFM	0.298593139643919	3.27422329485931	2.06159698628967	0.0823134344399566	0.932039001363628	-4.85878415332404
Q9BVI0	PHF20	-0.0661992416477734	3.2669080145894	-1.81363610680503	0.116981748546989	0.932039001363628	-4.85941282080144
Q9UF56-1	FBXL17	0.0555673071764205	3.32940381761888	0.258226222468294	0.80440419424747	0.976566103741551	-4.86134240754723
Q9UMX0-2	UBQLN1	-0.0880560697918345	3.33580629863219	-2.15842297813566	0.0717620010908577	0.932039001363628	-4.8615181528872
Q13505-1	MTX1	-0.193413598428192	3.30358929759623	-1.42986738431215	0.200086151030199	0.932039001363628	-4.86435939609549
Q9H063	MAF1	0.115701093942665	3.34158432327913	1.38584132884518	0.212533430754948	0.932039001363628	-4.86493859910964
P09038-4	FGF2	-0.113417417327972	3.34889862505481	-1.0072995947386	0.35064243363076	0.932039001363628	-4.86513461367829
Q9H2H0	CXXC4	0.081240934933226	3.29705284588082	0.426650901195919	0.683729892648074	0.95896803029979	-4.86519716779112
Q13449	LSAMP	-0.0963483704180217	3.37088631325258	-1.64918915614525	0.147498969226859	0.932039001363628	-4.86548539098877
O43708	GSTZ1	0.153087617764349	3.35534626243789	1.68219386052196	0.140816539513142	0.932039001363628	-4.86626473733286
Q9NQV6-6	PRDM10	-0.172340295549025	3.30589559932158	-1.67574452869146	0.142099156090521	0.932039001363628	-4.86777556997921
Q8N9B5-1	JMY	-0.103959326486594	3.29371494358943	-1.29119272770782	0.241673703107205	0.932039001363628	-4.86971200181494
Q96S19	C16orf13; METTL26	0.156574319206895	3.36122713479751	1.39162316616269	0.210859762729649	0.932039001363628	-4.87144410896509
Q8TF47-1	ZFP90	-0.143263020132454	3.31139338614806	-1.2898706156608	0.242104642545211	0.932039001363628	-4.87279919089629
Q9GZM8-2	NDEL1	-0.103863315833463	3.34932371775669	-1.36957224796434	0.217307202259564	0.932039001363628	-4.87290653703916
Q587I9	SFT2D3	-0.148005006254696	3.34382609225917	-0.98019864288276	0.362865351522031	0.932039001363628	-4.87299458958559
Q96HA8	WDYHV1	0.100861279486273	3.37295450637419	1.21271514495698	0.268442663257469	0.932039001363628	-4.87494189091663
P54278	PMS2; LOC107984056	0.134071921031206	3.34196459900717	1.93539547949469	0.0984476696685916	0.932039001363628	-4.87494231312842
Q8WYH8-1	ING5	-0.101300031181052	3.31735758626052	-1.50257899711215	0.1809774810886	0.932039001363628	-4.87555185246515
Q9HBH1	PDF	0.122183350544296	3.35123565563883	0.583043519091152	0.579979589337179	0.945185995875172	-4.87599531828293
P19623	SRM	0.107401781142985	3.36527762173629	2.00821345513503	0.0887872217007443	0.932039001363628	-4.8765760412785
Q8IYR6-1	TMEFF1; MSANTD3-TMEFF1	-0.299142532475568	3.12681366395429	-0.846419078633381	0.428077223643564	0.933352645533893	-4.8778381026797
Q9UGC7-1	MTRF1L	0.126225032477236	3.28898121379827	0.992955745808105	0.357070637469236	0.932039001363628	-4.87857644641581
Q9Y4F1	FARP1	-0.130999015750101	3.372832009748	-1.91620381938903	0.101163508557484	0.932039001363628	-4.87969243280022
Q9Y580	RBM7	-0.0998765347339764	3.32871093581281	-1.48258080358621	0.186058349432368	0.932039001363628	-4.88089023211092
P61313-1	RPL15	0.0977990409390195	3.30694619763663	2.07244228515281	0.0810574435075807	0.932039001363628	-4.8815471285932
Q92600-2	RQCD1; CNOT9	0.166235173742016	3.36360687360862	1.76845387740638	0.124696407966627	0.932039001363628	-4.88227546387422
Q8WTW4	NPRL2	-0.111693759163424	3.3634721837952	-0.858637999883137	0.421782655931225	0.933352645533893	-4.88282239715246
Q96JN0-3	LCOR	-0.088846056141538	3.2792184422176	-1.49653512667477	0.182499341683409	0.932039001363628	-4.88333245837419
Q9HC62	SENP2	-0.0773012836109115	3.32295694985608	-1.5466250467159	0.170237218107303	0.932039001363628	-4.88383730711138
Q8IXM3	MRPL41	0.353531020081441	3.35717183542158	1.49346429353777	0.183277110050471	0.932039001363628	-4.88393648284289
Q9BQ69	MACROD1	0.0935557958363915	3.29153782563424	1.49474382238396	0.182952664576355	0.932039001363628	-4.88426271677712
Q9Y2J4-4	AMOTL2	-0.106047905179354	3.44759887834183	-0.789779227809999	0.458143119734618	0.933352645533893	-4.88449076018059
Q9H672-1	ASB7	0.101739909286933	3.31891295758928	1.41313814930753	0.20473589414303	0.932039001363628	-4.88478322727856
P0CG08	GPR89A; GPR89B	-0.0900088708504248	3.34796778188164	-1.27982632345441	0.245400631685867	0.932039001363628	-4.88694387159991
Q96EY9	ADAT3	0.0983185502750463	3.3452966228683	1.31591387942401	0.233739289507688	0.932039001363628	-4.88765250851846
Q9BX79-4	STRA6	-0.130545071977951	3.35926075127474	-1.05989629289549	0.327855489536727	0.932039001363628	-4.89037003669497
Q9UIU6	SIX4	-0.130142609402218	3.33815411719882	-0.781201257317605	0.462823462711025	0.933352645533893	-4.89047657665652
P52799	EFNB2	-0.111113429929426	3.38676752891821	-1.22659071944706	0.263531027212127	0.932039001363628	-4.89182171815863
Q12962	TAF10	0.190485538107413	3.25830697223962	1.46778843721559	0.189900856449063	0.932039001363628	-4.89202863557583
Q9Y3L3-1	SH3BP1	-0.0820223446923833	3.31577896092932	-1.89327283774178	0.104505996539679	0.932039001363628	-4.89206911544806
P14316-1	IRF2	-0.0855630740523491	3.29713199701044	-0.41152258491106	0.69422868193584	0.959887803533645	-4.89211850648064
Q9H0A9-1	SPATC1L	0.121270393623853	3.36244402733507	0.526089641273988	0.61669901910156	0.947481858072883	-4.8925832059554
Q6ZMI0-1	PPP1R21	-0.0526226811155613	3.30933405103464	-1.86358793754865	0.108995428131452	0.932039001363628	-4.89285463010046
Q8IYR2	SMYD4	0.132269872020217	3.33846275278936	1.79790423190181	0.119613576864532	0.932039001363628	-4.8949293603526
Q9H3Z4	DNAJC5	-0.378691810289268	3.19757486050861	-1.46164752695998	0.191517357212038	0.932039001363628	-4.89760416261475
Q96IF1	AJUBA	-0.0818372658125056	3.1751459042588	-0.454931143980552	0.66430918098029	0.956862984969925	-4.89764978989416
Q92823-5	NRCAM	-0.110612538329446	3.38338144504563	-1.73839634712973	0.130100072276235	0.932039001363628	-4.8977883904018
Q9NZM4	GLTSCR1; BICRA	-0.074514447777997	3.32737636706746	-1.49122042803693	0.183847362518574	0.932039001363628	-4.89957396120219
Q8NF37	LPCAT1	-0.118511952741133	3.36990370589449	-1.29100528360947	0.241734759075529	0.932039001363628	-4.8997853683854
Q9BU61-1	NDUFAF3	0.130798955242332	3.32853040670576	1.37358477521472	0.21612095463334	0.932039001363628	-4.90063807482673
Q86UN3	RTN4RL2	-0.0844901841564967	3.42292471387791	-0.463334982094587	0.658591108945227	0.956862984969925	-4.90087539119125
Q96RQ1	ERGIC2	-0.0801652497246167	3.32506297735083	-1.37974213590697	0.214311927282698	0.932039001363628	-4.90123202999182
Q9NX20	MRPL16	0.239553076794118	3.32075144012619	1.40372852633775	0.207394099086739	0.932039001363628	-4.90179077867034
A6NNY8	USP27X	0.107424319849752	3.33683013156198	0.88312389718683	0.409373801656043	0.933352645533893	-4.90281990447582
Q7Z309-2	FAM122B	0.101248300411328	3.34467442695613	0.632171703467927	0.549359509222115	0.938225561925353	-4.90364416390373
Q9NWZ8	GEMIN8	0.102108786766694	3.35370954556139	1.27452350855797	0.24715652544393	0.932039001363628	-4.90408494947192
P12107-2	COL11A1	-0.14188411092612	3.36620373075042	-1.08428172859343	0.317704637527049	0.932039001363628	-4.90446136672818
P61266	STX1B	-0.0861849202791673	3.34765122326573	-1.39265043578157	0.210563645849174	0.932039001363628	-4.90447628232425
P22059	OSBP	0.051790132303988	3.33420046869983	2.1529707031485	0.072317951235873	0.932039001363628	-4.90477176105073
Q9NR28-1	DIABLO	-0.16263682790273	3.36589553987225	-1.89837129988761	0.103753509115995	0.932039001363628	-4.90635530507302
Q9BZR9	TRIM8	-0.069097152624755	3.26570748018221	-0.411639725999476	0.694147101304172	0.959887803533645	-4.907037837635
Q05D32	CTDSPL2	-0.142534234346558	3.24953735470565	-1.92413029371179	0.100032926426179	0.932039001363628	-4.90704397717312
Q92786	PROX1	-0.111357993213007	3.28841214806054	-1.48750590811376	0.184794966640183	0.932039001363628	-4.90868666825117
Q96A26	FAM162A	-0.0891259854215936	3.3214236757995	-0.585861090110789	0.578196619545304	0.945185995875172	-4.90933901889732
P07947	YES1	-0.104764164544071	3.36064017683413	-1.4377322719315	0.197933563868909	0.932039001363628	-4.91026198905781
P23142-4	FBLN1	-0.136052364524587	3.3413516050088	-0.899736476658187	0.401110712607674	0.933352645533893	-4.91103688880829
Q96CS4	ZNF689	-0.0838570426294626	3.36052059216201	-0.499768118703987	0.634093188337097	0.953267541452889	-4.91287692732053
P63000-2	RAC1	-0.086526307752274	3.33610569043857	-2.03400063580276	0.0855985032010544	0.932039001363628	-4.91451238560905
O75123	ZNF623	-0.103532177571446	3.24374901624279	-0.831700077602033	0.43575009785706	0.933352645533893	-4.9149494031081
Q9BUR4	WRAP53	0.0724901285826019	3.33348016434083	1.78484681868139	0.121841770375971	0.932039001363628	-4.91513096130188
P68106	FKBP1B	-0.111032174608405	3.3131762670466	-0.530730226418445	0.613659620123299	0.947020772181606	-4.91538259610041
Q9UJZ1	STOML2	0.114487470213871	3.29252162023502	1.83964465631518	0.112754400698873	0.932039001363628	-4.91674443729102
O95295	SNAPIN	0.149550005190487	3.35648437628287	1.65241508968749	0.146832707218171	0.932039001363628	-4.91729542219315
O76021	RSL1D1	0.125013342624331	3.34252891262885	2.20573617348185	0.0671168568039441	0.932039001363628	-4.9177055556654
P42765	ACAA2	0.128682195913017	3.27661531099208	2.08262928174263	0.079895308557912	0.932039001363628	-4.92047235588393
P21953	BCKDHB	-0.181605882586226	3.28447174572321	-0.979969501275015	0.362970105046107	0.932039001363628	-4.92090134296568
Q9Y388	RBMX2	-0.149227472817815	3.30187084331502	-1.5935911489907	0.15944277465499	0.932039001363628	-4.92240938963128
Q16854	DGUOK	0.0864501113053318	3.28993953079077	1.31492473662262	0.234052290318914	0.932039001363628	-4.92477904291487
P61599	NAA20	0.16935536941274	3.39503371266851	1.46738199148059	0.190007458679276	0.932039001363628	-4.92520686616681
Q14142	TRIM14	0.0960037275390474	3.24890753447555	1.0201860042161	0.344945868562704	0.932039001363628	-4.9253099902438
P23771-2	GATA3	-0.107477667223305	3.29939722138653	-1.3620391856471	0.219550033018584	0.932039001363628	-4.92577927727252
Q96T58	SPEN	-0.0614202841991957	3.30292560332386	-2.29926943923483	0.058818493867602	0.932039001363628	-4.92593948652457
Q9BWT1-2	CDCA7	-0.0795499682145597	3.31206545657438	-1.54122539924904	0.171521196247556	0.932039001363628	-4.92614982568885
P78364	PHC1	-0.0949747145915316	3.32253916293128	-1.83871237529756	0.112903310702864	0.932039001363628	-4.92654929836571
O15394	NCAM2	0.212408799976421	3.32831899256787	1.29337783966657	0.24096294773193	0.932039001363628	-4.92769257466775
Q9NWQ8	PAG1	-0.112867682844811	3.33039479785615	-1.01483934790602	0.347300413235618	0.932039001363628	-4.92847905856731
P78318	IGBP1	0.061451370420203	3.31545747212871	1.85914155870474	0.10968404657374	0.932039001363628	-4.92937659914388
Q13158	FADD	-0.105628128517247	3.36135053714204	-1.41762720261822	0.203478660246128	0.932039001363628	-4.92993841210535
P62070-4	RRAS2	-0.174322856759015	3.37060440787326	-1.5588650929047	0.167359851221541	0.932039001363628	-4.93032490739471
P07199	CENPB	-0.0693929473606061	3.34040400184581	-1.84826536296952	0.111386545339481	0.932039001363628	-4.93058064118181
Q9BYC8	MRPL32	0.132167336030369	3.29435491620386	1.28965208513825	0.242175937018946	0.932039001363628	-4.93064348971751
O00192	ARVCF	-0.136741467941425	3.35300363467894	-2.04358659628749	0.0844426968795981	0.932039001363628	-4.93265569098683
Q96C24	SYTL4	-0.106985473654851	3.31601633455646	-1.3664738293874	0.218227200584502	0.932039001363628	-4.93291345295587
P27361-1	MAPK3	-0.145202458674721	3.25707740090916	-1.48470465942143	0.18551256652557	0.932039001363628	-4.93463427991839
Q8N2G8-1	GHDC	-0.208389636906126	3.40774141618135	-1.20285507316299	0.271980445734827	0.932039001363628	-4.93556696176401
Q8WXD5	GEMIN6	0.107378205315199	3.32803063282563	1.81998965457609	0.115934960906347	0.932039001363628	-4.93669360620979
Q96SB8	SMC6	-0.0586080272145068	3.30635167920386	-2.04508131202438	0.0842638947041328	0.932039001363628	-4.94026626982362
O75955	FLOT1	-0.0884744574233188	3.36429021489397	-2.03308628425186	0.0857095766214256	0.932039001363628	-4.94029407735483
Q3L8U1-1	CHD9	0.122065042795482	3.30451510356755	1.81266187921885	0.117143073760599	0.932039001363628	-4.94034203317512
O75882-1	ATRN	-0.137615554045492	3.35817731655041	-1.33256428691156	0.228525850584963	0.932039001363628	-4.94043786374107
Q6ZWJ1-1	STXBP4	-0.0560899667187632	3.27464699451524	-1.82488078916204	0.115135363099714	0.932039001363628	-4.94044055571051
Q9BY41	HDAC8	0.0949829107145632	3.37227393048191	0.898024097229227	0.401956630752996	0.933352645533893	-4.94056361802303
Q5T160	RARS2	0.138571295636539	3.19843911611561	0.821310600204941	0.441225445609182	0.933352645533893	-4.94057862316969
P22570-3	FDXR	0.138820351626182	3.28814259912611	1.42029141167072	0.202735822870133	0.932039001363628	-4.94259086815319
Q15697-1	ZNF174	-0.114328881567929	3.31070114631689	-1.04991183344681	0.332086954433823	0.932039001363628	-4.94355427181172
P39656	DDOST	-0.144179067796548	3.39010196668875	-1.51330616801408	0.178305257201644	0.932039001363628	-4.9441787051983
Q3B7J2-1	GFOD2	0.106180963077797	3.33845379059976	1.26608322604174	0.249973958909341	0.932039001363628	-4.94420265488665
Q9Y680-1	FKBP7	-0.155195349937764	3.38377145751377	-1.34772326364404	0.223869510738592	0.932039001363628	-4.94434509729287
Q9Y5L4	TIMM13	0.426650536882032	3.28858709937234	1.66569717842349	0.144119621678021	0.932039001363628	-4.94436171294065
O96000	NDUFB10	-0.174912414464197	3.38618654882305	-1.65506787174989	0.146286969526749	0.932039001363628	-4.9452109661905
Q92665	MRPS31	0.0859311503910101	3.2981906835385	1.84326861020288	0.112177387415237	0.932039001363628	-4.94654051799306
Q8IYA6	CKAP2L	0.10003118234164	3.27402481279852	1.42430734874036	0.201620751538759	0.932039001363628	-4.94688299077211
Q96JK9	MAML3	-0.0849595333950819	3.28887799350536	-1.13646788961938	0.296847085738214	0.932039001363628	-4.94725007926612
P18583-3	SON	-0.0961515933280932	3.29811001352056	-0.904057856162013	0.398981888106229	0.933352645533893	-4.94919464289911
P05556-1	ITGB1	-0.120549162661236	3.38806361158798	-1.81179519836859	0.117286772737092	0.932039001363628	-4.94938162045385
Q96BN2	TADA1	-0.0720789492955402	3.3481327165939	-1.67657338473652	0.141933692651236	0.932039001363628	-4.95008650150713
Q9H4G4	GLIPR2	-0.104340120092257	3.42217249772701	-1.31265720819267	0.234771217816434	0.932039001363628	-4.95044712937726
O14657	TOR1B	-0.193947374109187	3.37777824110389	-1.4221241386539	0.202226251502293	0.932039001363628	-4.95112465030064
Q96S44	TP53RK	0.096785251102108	3.30079457733428	1.40032401876779	0.208363539546684	0.932039001363628	-4.95192994577017
P53597	SUCLG1	0.0970860225172699	3.23298642177006	1.83776029304007	0.113055582587072	0.932039001363628	-4.95246708898638
Q8N488	RYBP	-0.0748097624869646	3.28423333667804	-1.32271401550372	0.23159748720646	0.932039001363628	-4.95274076410359
Q00613	HSF1	-0.1221228751831	3.31215898155122	-1.57980933851209	0.162541753529167	0.932039001363628	-4.95276811717722
Q96JY6-5	PDLIM2	-0.0905640338059949	3.34819090129656	-1.2785800343087	0.245812324879546	0.932039001363628	-4.95531650505933
Q9HCJ5	ZSWIM6	0.0871692713703117	2.92532528805508	1.21667204425693	0.267034061669576	0.932039001363628	-4.95595415868529
P13804-1	ETFA	0.0968829291252301	3.23077808792176	1.89876570689467	0.103695521884275	0.932039001363628	-4.95610208512823
Q8IV63	VRK3	0.130189145810911	3.3186156155068	1.11017292928244	0.307210138644975	0.932039001363628	-4.95634591722661
Q8TCZ2-5	CD99L2	-0.071072712142886	3.34195597654942	-0.431096421674731	0.680659132831115	0.958070628144636	-4.95640172467486
P13682	ZNF35	-0.13324661033733	3.36743837057788	-0.934309130141859	0.384317490079268	0.933352645533893	-4.9567964378403
P21675-4	TAF1	-0.0506362000594123	3.27689942184826	-1.96767958947958	0.0940416313718062	0.932039001363628	-4.9571354103981
O94953	KDM4B	-0.0900101537123364	3.23184036232006	-1.64152851134697	0.149092698187178	0.932039001363628	-4.95773154184402
Q9BRG1	VPS25	0.11332836510501	3.33685052606535	1.61041395459803	0.155735490992295	0.932039001363628	-4.95779286783751
Q9Y2Y1	POLR3K	0.07023070272393	3.32630638088551	1.62204873390704	0.153219338600928	0.932039001363628	-4.95781175428928
Q7Z7E8-1	UBE2Q1	0.102307694201224	3.35432277072366	1.74443654925987	0.128996288969674	0.932039001363628	-4.95816383906786
P61457	PCBD1	0.166070855578595	3.30897479151577	1.20635574857344	0.270719865928739	0.932039001363628	-4.95858790388837
Q6PFW1-1	PPIP5K1	0.106932095811372	3.29502903112573	1.00873129380355	0.3500058742354	0.932039001363628	-4.95954787934987
O43353-1	RIPK2	0.0951720212080208	3.32212980402663	1.13329973132825	0.298080048022328	0.932039001363628	-4.96063241397325
Q96JM7-2	L3MBTL3	-0.0615788285447797	3.30849457233737	-1.75264242467383	0.127511257908764	0.932039001363628	-4.96099505475956
Q969E2-1	SCAMP4	-0.0814580973135319	3.33986232541732	-1.30526541043286	0.23712837425327	0.932039001363628	-4.96259214028517
P11137-4	MAP2	-0.10503926981191	3.32916258724316	-0.843300833086301	0.429694491096568	0.933352645533893	-4.96270515010846
Q5TAQ9-1	DCAF8	-0.0798621958283605	3.25886070655291	-1.37065561191307	0.216986346230779	0.932039001363628	-4.96302524697927
Q969V3	NCLN	-0.102836588984324	3.38216198809686	-1.29883478339776	0.239195976846914	0.932039001363628	-4.96306598307302
Q96L58	B3GALT6	-0.105350746933667	3.38051178409256	-0.938664416270064	0.382240527367744	0.933352645533893	-4.96469526299984
Q8WUI4-5	HDAC7	-0.0918519570758651	3.31191306405588	-1.40583487557762	0.206796357492943	0.932039001363628	-4.96472623563885
Q9HAV4	XPO5	0.0849598604158459	3.32029447228927	2.31056486007474	0.0578904051388706	0.932039001363628	-4.96489320177688
Q5JWR5	DOPEY1	-0.0208292681211485	3.35028268916548	-0.118708632664718	0.909175303564868	0.989037778170583	-4.96520370287394
Q8WU58	FAM222B	-0.134152031512267	3.28366096264878	-1.19947597173524	0.273202002569702	0.932039001363628	-4.96535365480991
Q9NQH7-1	XPNPEP3	0.096282280903588	3.28924638524474	1.50096460924208	0.181382834300641	0.932039001363628	-4.96567067104784
Q8TF76-1	GSG2; HASPIN	-0.0884574342267147	3.29300574037943	-1.04300173895711	0.335041226883423	0.932039001363628	-4.96590158920267
Q9Y3Y4	PYGO1	0.0539264683665854	3.24556883350099	0.252462406336112	0.808663161295023	0.977493103585679	-4.96622257982194
Q86XK3-2	SFR1	0.119518120684801	3.32347431599523	1.2991015120748	0.239109902493355	0.932039001363628	-4.96638649979276
P25325-2	MPST	0.0930584024958864	3.35024025346646	1.98165510636321	0.0921957775682337	0.932039001363628	-4.96752013514185
Q8TCG2	PI4K2B	0.10161245483724	3.31509515497885	1.221990985938	0.265150595102791	0.932039001363628	-4.96758194103417
Q8WXE1	ATRIP	-0.117590840469059	3.27022948609945	-1.11554366983035	0.305069438246549	0.932039001363628	-4.96759350595781
Q9BSY4-2	CHCHD5	0.368161258650151	3.23869759620177	1.43630402009191	0.198322894524633	0.932039001363628	-4.96814222368985
Q9NP08	HMX1	-0.0317097535033967	3.32552220196718	-0.173381089517722	0.867750918933733	0.985641969744609	-4.96859649852428
Q5TAP6	UTP14C	0.0914022103968399	3.29417496042896	0.769422953864972	0.46930412097282	0.933352645533893	-4.96860228853391
Q9UJK0	TSR3	-0.0973289227998535	3.27602378965937	-1.15404120057911	0.290085226283949	0.932039001363628	-4.97045238982905
Q3SYG4	BBS9	-0.0751266075004238	3.30495881755533	-0.553429973165748	0.59891238213602	0.945551680059626	-4.97054743547973
Q92805	GOLGA1	-0.0642929374834609	3.32944229148775	-1.90182012737875	0.103247533186342	0.932039001363628	-4.97094580890475
Q15139	PRKD1	-0.0686172389280616	3.31484541607116	-1.56263840021277	0.166482049190412	0.932039001363628	-4.97115718014088
Q9UKV0-7	HDAC9	-0.0918528286485936	3.36533908800362	-0.615129889392584	0.55986766752522	0.940903819702018	-4.97192930827825
Q96RF0	SNX18	-0.0956662682791066	3.33869572982366	-1.15777782863163	0.288664239758396	0.932039001363628	-4.97211177023666
Q6ZV73-1	FGD6	-0.0561006850718405	3.27262979335105	-1.68994612131187	0.139289474376272	0.932039001363628	-4.97319383211449
Q15113	PCOLCE	-0.0824941018346272	3.3701913967159	-1.67478356515248	0.142291222976918	0.932039001363628	-4.9739643844658
O75061-2	DNAJC6	-0.136802454549194	3.30222799238414	-1.39527981159817	0.209807421034732	0.932039001363628	-4.97449046452819
Q9P0N9	TBC1D7; TBC1D7-LOC100130357	0.118790139978813	3.32981463107648	0.732661722708743	0.489931756922537	0.933867075784067	-4.97449100181992
Q5TDH0-3	DDI2	0.114995702785492	3.34264559740598	1.75592410340036	0.12692201321472	0.932039001363628	-4.97634909912089
Q9NP90	RAB9B	-0.0821240772664709	3.37564219833854	-0.615172090436112	0.559841495792381	0.940903819702018	-4.97674672188469
Q8WUZ0-2	BCL7C	-0.118079340255037	3.27978348428839	-1.29683642314189	0.23984172325898	0.932039001363628	-4.97711901798487
O15131	KPNA5	-0.0572356473286366	3.23994968039054	-0.311219472140086	0.765605125983346	0.964919843462248	-4.98070128885383
Q03188	CENPC; CENPC1	0.0144551366983282	3.26982460978624	0.0791448415536589	0.939354512974829	0.991380091858874	-4.98090716970024
Q5VUB5	FAM171A1	-0.113589413187755	3.29684350794506	-1.05110307993947	0.33157979090586	0.932039001363628	-4.98111826831192
Q8TF39	ZNF483	-0.105351760181229	3.201793824722	-1.05963120127574	0.32796726982129	0.932039001363628	-4.98133079902334
Q13619-1	CUL4A	-0.100851797327862	3.2836217111307	-2.0993828466914	0.0780205514562388	0.932039001363628	-4.98180821521649
Q9HD20	ATP13A1	-0.125997251950853	3.35025044144063	-1.12579209150702	0.301018878413788	0.932039001363628	-4.98284723327709
Q15072	ZNF146	-0.108513951022466	3.29971829133231	-1.62352801344751	0.152902200633654	0.932039001363628	-4.9837196738752
Q9NQS3-1	PVRL3; NECTIN3	-0.103316190554316	3.3909466745874	-0.935440144207211	0.38377730028772	0.933352645533893	-4.98435526740136
Q9H3F6-1	KCTD10	-0.112347636994612	3.04620043222369	-1.48300401430598	0.185949475905354	0.932039001363628	-4.98459828570485
Q9HC07	TMEM165	-0.116062638738328	3.33286283466997	-1.37926910666327	0.214450418521494	0.932039001363628	-4.98489623286095
O00746	NME4	0.0816886514058572	3.33929430445157	1.40210349607503	0.207856319608819	0.932039001363628	-4.98619988726826
P80404	ABAT	0.209356735411201	3.31629855844714	1.41838195223786	0.203267969649694	0.932039001363628	-4.9867836357834
Q13127-1	REST	-0.0720126005107754	3.26569011712518	-0.454146183210235	0.664844536721338	0.956862984969925	-4.98714954055184
O75528	TADA3	-0.130677395714974	3.2390605897864	-1.9298064048475	0.0992310318415881	0.932039001363628	-4.98783668871074
Q8N129	CNPY4	-0.210267137038359	3.35993505312508	-1.31660581214431	0.233520556921471	0.932039001363628	-4.98818074982347
P52907	CAPZA1	-0.0770797597127011	3.32466306892202	-2.09405080739179	0.0786123407056857	0.932039001363628	-4.98831454403596
P35754	GLRX	0.27789018751522	3.21333280285369	1.39101727863255	0.211034589708259	0.932039001363628	-4.98835180485951
P82909	MRPS36	0.0736387884517048	3.25397820844408	1.53045129509527	0.174110201358394	0.932039001363628	-4.99122862417781
P36957	DLST	0.101930172825848	3.26668957394138	1.68634648434766	0.139996558107503	0.932039001363628	-4.99130382937767
A8MVW0	FAM171A2	-0.099265890600916	3.36063599109991	-0.963760170783224	0.370440391142375	0.932039001363628	-4.99155245229024
Q8TAP9	MPLKIP	-0.0251697245146016	3.31849680512466	-0.144130394839752	0.889866411287795	0.987205987935372	-4.99195889500217
Q9UIF9-1	BAZ2A	-0.0937808156689915	3.30665471236819	-2.07418693324226	0.0808572092871259	0.932039001363628	-4.99262465029285
Q14738-1	PPP2R5D	0.120287176973821	3.32477845629039	1.9834418007611	0.0919624183751955	0.932039001363628	-4.99362971103185
Q8NBA8	DTWD2	-0.106612991031511	3.29125978037439	-0.757189485554905	0.476101368517654	0.933352645533893	-4.9938774598771
Q8IXW5	RPAP2	-0.0727156806494087	3.29247286479594	-1.57068341353386	0.164624890068301	0.932039001363628	-4.99425667671361
Q7Z6B0-1	CCDC91	-0.0522905083897902	3.30312973225312	-1.90398968032603	0.102930490543244	0.932039001363628	-4.99476220366667
Q9H497-1	TOR3A	-0.171162964924809	3.35900649658156	-0.90756996376889	0.397258002290278	0.933352645533893	-4.99508076780677
Q6NZ36-2	C1orf86; FAAP20	0.210734354398174	3.32553721284374	1.15124830398809	0.291151161109957	0.932039001363628	-4.99559255185906
Q86SF2	GALNT7	-0.110949727861017	3.36877849148804	-1.68683553776033	0.139900290800896	0.932039001363628	-4.99632015049672
Q969S3	ZNF622	-0.100852196190571	3.31372093037576	-1.93407826639877	0.0986317346677921	0.932039001363628	-4.9963913860561
Q5SWX8-1	C1orf27	-0.108491724570233	3.34884465421918	-1.45728865150822	0.192672415092892	0.932039001363628	-4.99816177150272
Q8NBZ0	INO80E	-0.0183200452155648	3.20886238664168	-0.112244576470554	0.914096335508378	0.989037778170583	-4.99849030522697
Q9NS73	MBIP	-0.0903769265834681	3.2912462371529	-1.5247648037825	0.175491288850055	0.932039001363628	-4.9996144846135
Q9Y291	MRPS33	0.0672620630369519	3.27791523380616	0.370174458760535	0.723294641056679	0.959887803533645	-4.99988858418441
Q8N6I1-1	EID2	0.0723787905885184	3.0508007140065	1.30477560072031	0.237285303908922	0.932039001363628	-5.00015259977172
Q9NQE9	HINT3	0.0897108764257405	3.30936454598623	1.49154455154942	0.183764889144396	0.932039001363628	-5.00098980242543
Q14807	KIF22	-0.0711947930838322	3.31802626927436	-2.13551873892064	0.0741270981539132	0.932039001363628	-5.00210888361921
Q9UMR5-3	PPT2	-0.102482167376658	3.38112043825468	-0.790788639646118	0.457594549554317	0.933352645533893	-5.00367631209988
Q96CB9	NSUN4	0.177521228301422	3.32581894869216	1.00958873859185	0.349625077537494	0.932039001363628	-5.00438840311709
P51531	SMARCA2	-0.111673675030308	3.29575202424662	-1.13745410349054	0.296464148001969	0.932039001363628	-5.00590035316546
Q99807-1	COQ7	0.0975970544644667	3.32293620815268	0.808506718177256	0.448040747301278	0.933352645533893	-5.00622064097543
P27144	AK4; LOC100507855	0.0970254819253422	3.21327876021076	1.48890900207398	0.184436497451425	0.932039001363628	-5.00851807386991
Q9H9J2	MRPL44	0.134417752776303	3.29965585830125	1.42507207692815	0.201409049058543	0.932039001363628	-5.00991132239
Q96FH0-1	MEF2BNB; BORCS8	0.366629559528726	3.19658373701015	1.26037681501899	0.251894637018247	0.932039001363628	-5.00998015420674
A0AVK6	E2F8	-0.0821916853627633	3.21933183881817	-1.15038199005067	0.291482465530583	0.932039001363628	-5.0101464557977
P51153	RAB13	-0.133085808618614	3.26577250266755	-0.983051789154826	0.361562998102114	0.932039001363628	-5.01052043387452
Q96DX4	RSPRY1	-0.097701265056637	3.37839746097423	-0.94136132762962	0.380958733904186	0.932638287289909	-5.01068352353577
Q8WYL5-1	SSH1	-0.0854745685483518	3.3248075101926	-0.818736500747873	0.442589611894171	0.933352645533893	-5.01169131135391
Q9UHH9	IP6K2	0.0917709804123453	3.24339594153805	1.08266144501141	0.318371053316267	0.932039001363628	-5.01201257277114
A6NHT5	HMX3	-0.101737366800979	3.22774051482246	-1.36511711178021	0.218631142428235	0.932039001363628	-5.01262449669848
Q9Y4W2	LAS1L	-0.0740132292963025	3.32819298650577	-1.99251136947154	0.0907869203098653	0.932039001363628	-5.01329229737915
Q9NT99	LRRC4B	-0.113700414906617	3.42062511277886	-1.39569481753136	0.209688287088503	0.932039001363628	-5.01370500331015
Q8TB96	ITFG1	-0.0816578422026236	3.32203638896801	-1.04148946537724	0.335690583601532	0.932039001363628	-5.01373984114385
P53779	MAPK10	0.0980022422154988	3.35203063732898	0.971218235914454	0.366988514102376	0.932039001363628	-5.01404749539788
Q9NZ09-4	UBAP1	-0.0925032699879577	3.32149888588518	-1.12665869693442	0.300678422913645	0.932039001363628	-5.01424516883239
Q9BT92	TCHP	-0.074403380390105	3.35889185523712	-0.524509949446581	0.617735537024826	0.947481858072883	-5.01466824891265
Q3B820-3	FAM161A	-0.0945832901700654	3.22676921645156	-1.02184596610071	0.344217451635153	0.932039001363628	-5.01480499194486
Q8NBI6	XXYLT1	-0.12431842913931	3.35259898108885	-1.07955967117664	0.319649989563551	0.932039001363628	-5.01544725629392
P08582-1	MFI2; MELTF	-0.128429822215071	3.33497227834775	-1.02707979850332	0.341928796330315	0.932039001363628	-5.01646668676862
Q9Y4E5-4	ZNF451	0.0622021101598932	2.93747233815258	0.380908643588847	0.715698283953816	0.959887803533645	-5.01749720126591
O15379-2	HDAC3	-0.0927886594213746	3.35598611308819	-1.69249029529283	0.138791784260151	0.932039001363628	-5.01761970978106
Q9BRU9	UTP23	0.166281380650134	3.35502268808888	1.38784696197386	0.211951508478228	0.932039001363628	-5.0180253488724
Q9P035	PTPLAD1; HACD3	-0.13692902777225	3.37568742004096	-1.62820774370827	0.151903022125871	0.932039001363628	-5.01898269440183
Q9Y3B6	EMC9	0.0987075788619042	3.37061277174786	1.02630316224366	0.342267634565551	0.932039001363628	-5.01898758319001
O43543	XRCC2	0.0853966624237556	3.26319280278906	0.772467409761156	0.467623004723642	0.933352645533893	-5.01900718868274
Q6NSI8-1	KIAA1841	0.104718116926401	3.27915954729775	0.689252164906143	0.515063694481471	0.936227241329345	-5.01910021457483
P23919	DTYMK	0.0447019349432741	3.33303534075081	2.20084316882015	0.0675826686174445	0.932039001363628	-5.02098266111263
O43739	CYTH3	-0.0713420290096299	3.2031228417621	-1.33886755675181	0.22657932382013	0.932039001363628	-5.0210379564083
Q00537	CDK17	-0.0958575294185587	3.34771948131797	-0.918275486931154	0.392037966199614	0.933352645533893	-5.02133765146322
Q8WUW1-2	BRK1	0.442000670061507	2.98309079850785	1.65354236045876	0.146600565287457	0.932039001363628	-5.02142245996336
Q5SRI9	MANEA	-0.102118104458653	3.31683943833798	-0.913740181630545	0.394243018098439	0.933352645533893	-5.02292990128835
O95571	ETHE1	0.0927174166140285	3.2608464125299	1.06202073077338	0.32696080024365	0.932039001363628	-5.02366453334498
Q6GQQ9-1	OTUD7B	-0.0989336088617827	3.32217610700835	-1.55410984298527	0.168472259736122	0.932039001363628	-5.02429570056321
Q9NVR5	DNAAF2	-0.127809389602885	3.26406922400392	-1.52546659016119	0.175320295218764	0.932039001363628	-5.02430633993389
Q15005	SPCS2	-0.198588908411227	3.40529462903621	-1.61671526252627	0.154367946447262	0.932039001363628	-5.02460583842373
Q09019	DMWD	-0.0830411050965596	3.29901021752435	-1.36092480173628	0.21988357550123	0.932039001363628	-5.02464534510797
O95182	NDUFA7	0.104817154884484	3.25116414204212	1.58123156603469	0.162219347520593	0.932039001363628	-5.02552632757559
Q9BQI3-1	EIF2AK1	-0.0731639328730797	3.16096694556667	-1.2640851927829	0.250645005215435	0.932039001363628	-5.02605304726883
Q9NW64-1	RBM22	-0.0853270402802734	3.36418520509392	-1.77985556836504	0.122704141013315	0.932039001363628	-5.02650454134379
O15068	MCF2L	-0.00607795688774161	3.37564224626074	-0.0404495950042016	0.968977455207318	0.99710473811842	-5.02725289046218
Q6UX07	DHRS13	-0.110467361740328	3.43102690173055	-0.566154774694687	0.590734080612341	0.945551680059626	-5.0276471875501
Q9H8E8-1	PET117; CSRP2BP; KAT14	-0.113987204339603	3.27015474742828	-1.43605781519584	0.198390078659882	0.932039001363628	-5.02768538154197
Q9HBH9-1	MKNK2	0.0675710993030824	3.40135550305187	0.521998872106409	0.619385146744365	0.9477800172976	-5.03052025468644
O43915	FIGF; VEGFD	-0.162504009453313	3.45736803451904	-1.52352966039545	0.175792614223746	0.932039001363628	-5.0316326297692
P48380	RFX3	-0.0832753407611306	3.30150913408777	-1.22598327197529	0.263744420413345	0.932039001363628	-5.03171209655293
Q9BWS9-2	CHID1	-0.149439222587684	3.37287359290811	-1.52204881084745	0.176154516100328	0.932039001363628	-5.03228820824499
Q13686	ALKBH1	0.110668820492301	3.32598083203342	0.851938538051593	0.425225445095814	0.933352645533893	-5.03234916101772
Q8NEN9	PDZD8	0.157312754980108	3.35718349356154	1.02875773036897	0.341197647782076	0.932039001363628	-5.03252361105377
Q14BN4	SLMAP	-0.102673820414468	3.30506434485227	-0.859629689070542	0.421274776222108	0.933352645533893	-5.03382299000894
P35670	ATP7B	-0.0559251690932527	3.31619502819643	-0.374117154045676	0.720500453243441	0.959887803533645	-5.03403790880124
Q9Y5J7	TIMM9	0.42291580248573	3.22228133061967	1.35257276350525	0.222397863070802	0.932039001363628	-5.0340492272861
P14324	FDPS	0.0638958655369328	3.31978604604087	2.02511604084135	0.0866839372161663	0.932039001363628	-5.03407776337609
Q99549	MPHOSPH8	-0.090423548645525	3.29586320531244	-1.8114990299859	0.117335918060541	0.932039001363628	-5.0341101031003
Q76N32	CEP68	0.0880688778904335	3.2955669750874	0.754179302340318	0.477784215670718	0.933352645533893	-5.03454226500085
Q9BRQ6	CHCHD6	-0.131887517242522	3.32116727622609	-1.72167101623214	0.133204268180138	0.932039001363628	-5.0345767452248
Q96EK4	THAP11	-0.0829846200848669	3.28290564104013	-1.35593597799247	0.221382329783796	0.932039001363628	-5.03489022859534
P54098	POLG	0.0922708787182327	3.24087607861632	0.646153960469435	0.540829368748857	0.936227241329345	-5.03535139660672
Q9UKL3	CASP8AP2	-0.0698654595731834	3.2339429133733	-1.35093857721018	0.222892811672873	0.932039001363628	-5.03608095577307
Q7Z4G4	TRMT11	0.0830930892632233	3.32622080732534	1.38758810638696	0.212026533058147	0.932039001363628	-5.03652679257924
Q9Y6M7-7	SLC4A7	-0.0885531035822085	3.34184667324638	-1.63848754765352	0.149729874398212	0.932039001363628	-5.03784641853758
Q9Y2K5-1	R3HDM2	-0.107741447326431	3.32940892349904	-1.23612445084831	0.260201323153083	0.932039001363628	-5.03791280986433
Q16698	DECR1	0.135910370471354	3.24604453128652	1.18020894774434	0.280256820532585	0.932039001363628	-5.03806523216473
Q2Q1W2	TRIM71	-0.0603705188229842	3.31071989252133	-1.63407881949258	0.15065823740344	0.932039001363628	-5.03863269943566
Q5FBB7-1	SGOL1; SGO1	-0.0948201794879896	3.24764621234731	-1.48295788993693	0.185961338827505	0.932039001363628	-5.03898291763866
P14854	COX6B1	0.336663432504346	3.36797019611756	1.5351200434195	0.172983866485458	0.932039001363628	-5.03916540228558
Q8IV50	LYSMD2	-0.0185756264212511	3.33209737446616	-0.116563232322166	0.910808107019145	0.989037778170583	-5.03927002408473
Q8N612-2	FAM160A2	0.0899732876730251	3.2969168088571	1.0196361278503	0.345187433497279	0.932039001363628	-5.03968377793945
Q13107-1	USP4	0.101048336609107	3.3261604575146	1.6109031818481	0.155628907158301	0.932039001363628	-5.04014436912951
Q9GZZ9-1	UBA5	0.0653981227124378	3.33508493299754	1.68523492045813	0.140215599149806	0.932039001363628	-5.04145244397911
P36268-3		-0.0940099648890326	3.37050502542484	-0.956514174084794	0.373818197203424	0.932039001363628	-5.04162549307129
P49760-1	CLK2	-0.0859043556944609	3.3189597549604	-0.871906137307631	0.415024728055708	0.933352645533893	-5.04166887880008
Q6IA86-6	ELP2	0.0594076618232472	3.35263582553135	1.88724750489534	0.105402236508915	0.932039001363628	-5.04287078435939
P50148	GNAQ	-0.122670878637129	3.37877183491236	-1.48366155374366	0.18578043638622	0.932039001363628	-5.04378977437757
Q13496	MTM1	-0.0861858654512562	3.30832297757939	-1.08873733565021	0.315877953238797	0.932039001363628	-5.04826026328283
Q8WUU5	GATAD1	-0.0997116283464915	3.2477089123894	-1.00948018376992	0.349673269254882	0.932039001363628	-5.04837608391806
Q8N680	ZBTB2	-0.10784922527444	3.31478006292691	-1.30431130467415	0.237434143801357	0.932039001363628	-5.04933987147052
P18065	IGFBP2	-0.161498608420965	3.23135516444313	-1.26517856531048	0.250277598060465	0.932039001363628	-5.04990000845353
Q02083	NAAA	-0.072691930007971	3.3401289831278	-0.590352813745304	0.575360920143086	0.944138663962448	-5.05065782391422
Q4G148-1	GXYLT1	-0.115011328515728	3.35359827484753	-1.31806292643916	0.233060528581153	0.932039001363628	-5.05145622054965
Q9H857-2	NT5DC2	0.100169489549451	3.26295268401984	1.49035655010209	0.184067343617518	0.932039001363628	-5.0516904960132
Q96C92-4	SDCCAG3	-0.0911794074056529	3.30216126959464	-1.2173862037075	0.266780507766499	0.932039001363628	-5.05248500599571
P54652	HSPA2	-0.0644428705370474	3.29142266907586	-1.48540423972152	0.185333113655257	0.932039001363628	-5.0526687146014
P68431	HIST1H3F; HIST1H3C; HIST1H3D; HIST1H3G; HIST1H3H; HIST1H3B; HIST1H3A; HIST1H3E; HIST1H3I; HIST1H3J	-0.100618515395919	3.39520889454326	-1.84166759143183	0.112431946686232	0.932039001363628	-5.05290165518256
P46781	RPS9	0.127753910483822	3.32647822035581	2.00398379950141	0.0893214975549484	0.932039001363628	-5.05292889050977
P08240-1	SRPR; SRPRA	-0.144443698364933	3.35028184573022	-1.04476382806938	0.334285877314876	0.932039001363628	-5.053200421225
Q9H9L7	AKIRIN1	0.21563934292835	3.31175647117595	1.0919332315983	0.314573029620661	0.932039001363628	-5.05323057761214
Q86YS3	RAB11FIP4	0.0766846338428866	3.13563821515234	0.945547183825677	0.378975809272537	0.932529785973849	-5.05331305045075
Q9UJJ9	GNPTG	-0.114260042588461	3.31438679573061	-0.943392361200042	0.379995599415656	0.932529785973849	-5.05403775297437
Q4G0X4	KCTD21	0.0202103890869962	3.3720712098593	0.125710543309253	0.903849733466874	0.989037778170583	-5.05418939917239
Q14135-4	VGLL4	0.146696398504758	3.2419780462399	1.12251910999254	0.302307598749041	0.932039001363628	-5.05429629089443
Q9NTJ5	SACM1L	-0.146985989106009	3.36946791349868	-1.7216589553719	0.133206532231947	0.932039001363628	-5.0545429144306
O60476	MAN1A2	-0.089451443788596	3.35125258599674	-1.34956280258811	0.223310257059137	0.932039001363628	-5.0553127268962
P07951-2	TPM2	0.0510314235404913	3.18306314624503	0.306603665777622	0.768957398172428	0.965777832082334	-5.05755804506578
Q86WX3	RPS19BP1	0.166237050815547	3.37273588357129	1.2836554323994	0.244139516924218	0.932039001363628	-5.0577889001942
Q8TEH3-7	DENND1A	-0.118259093102869	3.2967658569857	-1.08535215662669	0.317265001743751	0.932039001363628	-5.05786673081266
P47755	CAPZA2	-0.110539276241782	3.31541825511036	-1.97672923863765	0.092842210403207	0.932039001363628	-5.05810001025169
Q05707-1	COL14A1	-0.163603032283238	3.36257771123737	-1.77627216406662	0.123326927406259	0.932039001363628	-5.05874528078262
Q9Y592	CCDC41; CEP83	-0.100158936582077	3.29601467625961	-1.44501460521895	0.19595927972653	0.932039001363628	-5.05895596874486
P11279	LAMP1	-0.143952138167244	3.35408203194157	-1.56686478296705	0.165503969741974	0.932039001363628	-5.05954523636237
P43250-2	GRK6	-0.0757485613746768	3.31318533412831	-0.769535581079098	0.469241855036078	0.933352645533893	-5.06139644851194
Q96QF0-1	RAB3IP	0.144628117941264	3.3164481648076	1.23832915842928	0.259436509448939	0.932039001363628	-5.06170033961232
Q8IYW5	RNF168	-0.0680392005525928	3.30374264832593	-1.42878100914654	0.200385158201133	0.932039001363628	-5.06190536935601
Q9Y276	BCS1L	0.197021678561402	3.27996689798568	1.32912491004718	0.229594227342716	0.932039001363628	-5.06259537910485
Q9BPX5	ARPC5L	-0.224234965411754	3.30203358234951	-1.71200397147864	0.13503090013774	0.932039001363628	-5.06285742715872
Q96B54	ZNF428	-0.0665902045085981	3.35034745558418	-0.589534111370373	0.575877167424889	0.94475441276855	-5.06286672369364
Q8IYH5-1	ZZZ3	-0.100284380999114	3.2794210551908	-1.59480605132397	0.159172277760334	0.932039001363628	-5.0631839109735
A4D2B0	MBLAC1	-0.054000118441092	3.40852803983465	-0.396846175634762	0.704484545818129	0.959887803533645	-5.06482181942325
Q96LT7-1	C9orf72	-0.0826356234018666	3.32855306688525	-0.94232158991715	0.380503135539622	0.932529785973849	-5.06541121046789
P42684	ABL2	-0.0707946263049781	3.28139204875345	-0.647125055104943	0.540240018610163	0.936227241329345	-5.06563531135515
Q04656-3	ATP7A	-0.0744918904181	3.31192476562481	-1.44086056336478	0.197083250783362	0.932039001363628	-5.06576297628272
Q53G59-2	KLHL12	-0.0815370489612284	3.26000966590128	-0.964298876542687	0.370190215484064	0.932039001363628	-5.06607129718145
Q7Z494-1	NPHP3	-0.0768661543073842	3.30541787272198	-0.734749033352236	0.488744332579557	0.933757352657148	-5.06664009491966
O15534-1	PER1	-0.139534100704499	3.1695161044434	-1.37129866674351	0.216796096132235	0.932039001363628	-5.06946094617682
Q8IWP9	CCDC28A	0.0406382743461922	3.23280882741874	0.299681692605847	0.773994674245138	0.966591892494208	-5.06981901699134
Q9BRZ2-1	TRIM56	-0.067765899428916	3.30241240977458	-1.6288538916931	0.15176554937566	0.932039001363628	-5.07044005336854
Q969T3	SNX21	-0.0652326118352336	3.32555007183402	-0.508749883488027	0.62812844161993	0.94948906603879	-5.07116242428496
Q8TEW0-8	PARD3	-0.086336279018336	3.33361280245033	-1.04207907875693	0.335437288581461	0.932039001363628	-5.07329188353637
O75165	DNAJC13	-0.0588728651416097	3.31493828941021	-2.2217290282464	0.065617125662405	0.932039001363628	-5.07338064085056
P61247	RPS3A	0.110428930038351	3.31617978599515	2.36544116234626	0.0535920827926589	0.932039001363628	-5.07414198922008
P61586	RHOA	-0.122692011026835	3.32397945467529	-1.88239561352856	0.10612944534223	0.932039001363628	-5.07428247404472
Q9H7X3	ZNF696	0.132899246783374	3.31065442313219	1.09511278637297	0.313279174477419	0.932039001363628	-5.07484122424679
O43175	PHGDH	0.0641575461526696	3.33398161072678	2.37356610771351	0.0529843349116046	0.932039001363628	-5.0748484110511
P62330	ARF6	-0.108796446242295	3.31532779660842	-1.56205930640708	0.166616485700667	0.932039001363628	-5.07505452668909
Q9NZ56	FMN2	-0.0890332903453089	3.35056601098127	-0.919633743130622	0.39137940833525	0.933352645533893	-5.07509009719632
P57088	TMEM33	-0.101643482213055	3.39079086416494	-1.40953043488017	0.205751397069683	0.932039001363628	-5.07539021583019
P0C1Z6	TFPT	-0.095731075253437	3.26819788995582	-1.36093259328159	0.219881241866034	0.932039001363628	-5.0756995588069
Q5ST30-4	VARS2	0.0864613941804191	3.26739054758296	1.21180382756403	0.268767981117115	0.932039001363628	-5.07585206530208
O94854	KIAA0754	-0.0896716642374108	3.30784775280854	-1.07975022825407	0.319571297388203	0.932039001363628	-5.07704450512397
Q01538-2	MYT1	-0.0507423510691303	3.29193600701566	-1.80977520831788	0.117622363674969	0.932039001363628	-5.0783311609759
Q9H6H4-1	REEP4	-0.0995014768372713	3.36681870038057	-0.689943455598782	0.514656977164132	0.936227241329345	-5.07841915539325
O60941-1	DTNB	-0.0919696785127027	3.32798484500038	-0.782435215409331	0.462148137781588	0.933352645533893	-5.07869007079089
A5PLN9-5	C5orf44; TRAPPC13	-0.0808935199675256	3.33426935919896	-1.40076622747237	0.208237388527733	0.932039001363628	-5.07931264737185
Q9BVN2	RUSC1	-0.0656875857170751	3.35650376443391	-0.443188344463155	0.672340184799963	0.957498933183261	-5.08012008505819
P83111-1	LACTB	-0.0527183984154825	3.31394988477108	-0.366966826348103	0.725571303455135	0.959887803533645	-5.08029008733993
O75608	LYPLA1	0.0800413844839629	3.34931675886944	1.57505369403339	0.16362419476383	0.932039001363628	-5.08083373063147
Q9UKT7	FBXL3	-0.0732519070392249	3.23405791875668	-1.14406570028803	0.29390757657574	0.932039001363628	-5.08095260218523
O43309	ZSCAN12	-0.0455546512577538	3.21230132826593	-0.282354094986724	0.786656187362285	0.969133379989587	-5.08137131884948
P53618	COPB1	0.114329885783856	3.33333454502749	2.22062711950286	0.0657193483361909	0.932039001363628	-5.08195807251723
P36873-2	PPP1CC	-0.155356432029237	3.27547799430074	-1.1419763892596	0.294713469740422	0.932039001363628	-5.08256934579927
Q9BQ04	RBM4B	-0.0883733543064377	3.28475493300762	-1.17639099854549	0.281673020478952	0.932039001363628	-5.08269890398517
Q99956	DUSP9	0.118476664907923	3.40075031203567	0.857872692633685	0.422174904054197	0.933352645533893	-5.08301597941546
Q4KMQ1	TPRN	-0.0806219546771665	3.2237477955929	-0.936086478802019	0.383468861827772	0.933352645533893	-5.08391833917712
Q6P1L8	MRPL14	0.102116531672788	3.25238486851332	1.09439438008119	0.313571132175635	0.932039001363628	-5.0844025017883
O75398	DEAF1	-0.0709098601357394	3.31299125742696	-1.28405143598349	0.244009417934928	0.932039001363628	-5.08475033107284
P11137	MAP2	-0.068166087567513	3.30499417680721	-2.31547658362465	0.0574915591982264	0.932039001363628	-5.08559308788673
O43913	ORC5	0.0998341800003714	3.30831037502368	1.77287186271676	0.123920731780284	0.932039001363628	-5.08564827293595
Q9GZT6	CCDC90B	0.131443436805225	3.265528731456	1.04662505291589	0.333489521690043	0.932039001363628	-5.08580453931253
Q9P0W5-5	IQCJ-SCHIP1; SCHIP1; IQCJ	0.077535791086036	3.35009408353391	0.725294866721395	0.494138090076819	0.935237434720301	-5.0862306207031
O94805	ACTL6B	-0.0780100023097271	3.33795191719745	-0.786895402090231	0.459712890275778	0.933352645533893	-5.08738615897679
Q6ZV89-1	SH2D5	-0.00245047152307402	3.30565920267725	-0.0168820997257275	0.987049012370818	0.997918327736762	-5.08855811883513
O15091	KIAA0391	0.164243139368347	3.25119918657087	1.42471055434781	0.201509105455384	0.932039001363628	-5.08878786847311
P26232	CTNNA2	-0.100098581869842	3.34389977377514	-1.7776398282853	0.123088869063894	0.932039001363628	-5.09032646553796
Q9BRJ2	MRPL45	0.197511949689834	3.300790417621	1.54990703722442	0.16946118849969	0.932039001363628	-5.0910960924396
Q9NX70	MED29	0.328006242679943	3.22683303740037	1.64810305188989	0.147723932872364	0.932039001363628	-5.09179825016165
Q52WX2	SBK1	0.0949911677460795	3.34588219299869	0.62667707670853	0.552734236883376	0.938225561925353	-5.09205362199644
Q13217	DNAJC3	-0.262690129449197	3.3588907773568	-1.68522244108964	0.14021806015544	0.932039001363628	-5.09240732403371
Q96G97-4	BSCL2	-0.112023620473662	3.35502770248934	-1.25021880069194	0.255345431280535	0.932039001363628	-5.09300858296243
P35221-2	CTNNA1	-0.0880765166690466	3.33741886693988	-2.28672879421351	0.0598668851128446	0.932039001363628	-5.0937420653066
O00451-1	GFRA2	-0.111177958098009	3.39946438620216	-1.92796401199295	0.0994906147270054	0.932039001363628	-5.09425361314753
O14786-1	NRP1	-0.114841103588685	3.38425960719573	-1.5656054749002	0.165794836845597	0.932039001363628	-5.09535793784011
Q10469	MGAT2	-0.0949708897981001	3.36058544343737	-1.24325626384875	0.257734318479894	0.932039001363628	-5.09536776369592
P00519	ABL1	-0.086539980283042	3.33450756980227	-1.71387669428768	0.134675167104022	0.932039001363628	-5.09541531176042
O94910	LPHN1; ADGRL1	-0.158611940056169	3.33321280833434	-0.964320326479203	0.370180256821199	0.932039001363628	-5.09619513346989
O14967	CLGN	-0.100447372472784	3.33891896443585	-0.976422891173149	0.364594477112268	0.932039001363628	-5.09658888791263
Q9BUB5-1	MKNK1	-0.0912579204587835	3.29640666727637	-0.794488496815014	0.455587786915322	0.933352645533893	-5.09706104375007
P63096-1	GNAI1	-0.0856987395431123	3.36321412149321	-1.36101661154477	0.219856079078335	0.932039001363628	-5.09732751751252
Q15904	ATP6AP1	-0.0928490667561239	3.33757669671826	-1.04567602143152	0.333895389168551	0.932039001363628	-5.09736139619315
P24752	ACAT1	0.193259243148152	3.26603559452961	1.84913327014952	0.111249739851639	0.932039001363628	-5.0980374643615
Q9BYB0	SHANK3	-0.0749715916563153	3.30593123723655	-0.845711203808185	0.428443971530007	0.933352645533893	-5.09816124145278
Q15283-1	RASA2	0.128796324414238	3.29807660900839	0.924395464245353	0.389077293374265	0.933352645533893	-5.09866678052699
Q96EK5	KIAA1279; KIF1BP	0.14129333538762	3.36905733587327	2.02141657888357	0.0871399676895667	0.932039001363628	-5.09894186907061
Q9Y2V7-1	COG6	0.146188065106722	3.35018462113894	1.48420405395982	0.185641077690321	0.932039001363628	-5.09897204511085
Q7L2K0-1	C16orf59	0.0546057453404623	3.315006932652	0.391281393602382	0.708391015361577	0.959887803533645	-5.10239380339891
Q99457	NAP1L3	0.084814539471863	3.3232353202641	0.786337647282411	0.460016930545175	0.933352645533893	-5.10257435435043
O75251	NDUFS7	0.177551316301877	3.30953244781179	1.15978757786749	0.287902386216273	0.932039001363628	-5.10273535798091
P60953	CDC42	-0.121862708677663	3.32445977009486	-1.84275546791734	0.112258914510502	0.932039001363628	-5.10314997200551
Q8NEW0	SLC30A7	-0.0761310711106811	3.33293863939731	-0.535963573552379	0.610241928646503	0.946778730613976	-5.10340561968776
Q8IV48	ERI1	0.0481032631435814	3.33918193068496	1.71995379808408	0.133526996129988	0.932039001363628	-5.10377773481819
Q6UXK2	ISLR2	-0.0755350721038096	3.30810610140082	-1.01538810839167	0.347058164529644	0.932039001363628	-5.10493800732903
Q969N2	PIGT	-0.256034373755784	3.38442213516522	-1.46352440255722	0.191021963168878	0.932039001363628	-5.10496605428471
O75064	DENND4B	-0.0893362394471881	3.32520912084979	-0.582556756081667	0.580287941375149	0.945185995875172	-5.1051430253829
P51688	SGSH	-0.0440558686987346	3.38521342309421	-0.15917367636881	0.878477877585407	0.985723641910063	-5.10526331645936
Q9BRR6-1	ADPGK	-0.220121776351839	3.38400095138556	-1.55562189127571	0.168117794020812	0.932039001363628	-5.10670142587016
Q495W5-1	FUT11	-0.106746312611134	3.34783933934358	-1.27671489449695	0.246429575292482	0.932039001363628	-5.10734421067893
Q9H816	DCLRE1B	0.0675646075426991	3.28500511469164	0.487082176858557	0.642568708693766	0.954187564893818	-5.10783453863071
O43156	TTI1	0.0702868023171714	3.32076437744594	1.68056106146139	0.141140212086787	0.932039001363628	-5.10931984083134
Q9P2K3-3	RCOR3	-0.0913405689938748	3.29208427168868	-1.64396804738434	0.148583404654187	0.932039001363628	-5.10941765223983
Q9Y2Z2-6	MTO1	0.0540472133838969	3.34924364837638	0.381771897930317	0.715088890101796	0.959887803533645	-5.10964746814735
Q8IY92	SLX4	-0.067886559352222	3.27208596392036	-0.498062449349609	0.635229303293689	0.953267541452889	-5.11101821455638
Q9NYB0	TERF2IP	-0.0633722005134521	3.29241778806372	-2.06552078594991	0.0818567700285276	0.932039001363628	-5.11141676391749
Q8IW19	APLF	-0.0887258966291011	3.29642205978174	-0.809741968117955	0.447379996555763	0.933352645533893	-5.11143767974061
P17029	ZKSCAN1	-0.149019442503125	3.2670722983436	-1.40415574503109	0.2072727363196	0.932039001363628	-5.11164576032078
Q3ZCT1	ZNF260	-0.0697200967208219	3.26980980384053	-0.417140123734866	0.690321466189006	0.959887803533645	-5.11205029565136
Q12797	ASPH	-0.094687402884224	3.33638443489991	-0.796079458661282	0.454726772649068	0.933352645533893	-5.11341409065484
Q8N428	GALNT16; GALNTL1	-0.0697307084735741	3.37180814257343	-1.34332887712947	0.225210545038709	0.932039001363628	-5.1148645707396
Q9NWV8	BABAM1	0.072112589211774	3.32781969455086	1.66568807126668	0.144121465468025	0.932039001363628	-5.1149423359793
Q9NUJ3	TCP11L1	-0.0741953160621676	3.32061444035536	-1.50056004933138	0.181484545959199	0.932039001363628	-5.11577647229892
Q16667	CDKN3	-0.072614363923409	3.35938782177361	-1.02019500479517	0.344941915659539	0.932039001363628	-5.11638718067959
Q12981	BNIP1	0.00247163637839767	3.34633677183852	0.0178083712288781	0.986338514192874	0.997918327736762	-5.11638969593612
Q9Y375	NDUFAF1	0.124835417603462	3.3144570522732	1.29254184884675	0.241234654782441	0.932039001363628	-5.11695690730497
O95343	SIX3	-0.0620469654778609	3.36780527155857	-0.57339585884923	0.586109012725676	0.945185995875172	-5.11727715151005
P36542-1	ATP5C1	0.106007788341957	3.28037551525522	1.46349119316313	0.191030718431098	0.932039001363628	-5.11748582486817
Q969G3	SMARCE1	-0.0776654900762729	3.3016421531841	-1.99160238682838	0.0909040520509688	0.932039001363628	-5.11846026717934
O75817	POP7	-0.0876021142060986	3.32723723891575	-0.999358141835627	0.35419000545202	0.932039001363628	-5.11878780946451
Q14699	RFTN1	-0.138854202114156	3.37501538396193	-1.2128556517012	0.268392535863577	0.932039001363628	-5.11903459299266
Q9H469	FBXL15	0.0941658461187348	3.37309541379033	0.820085108674916	0.441874529574968	0.933352645533893	-5.11932429505069
Q01094	E2F1	-0.133428222460565	3.08565808317004	-1.17350035163184	0.282749282984003	0.932039001363628	-5.1200952411881
P04114	APOB	-0.167686211084623	3.26728764931313	-1.24135588989168	0.258389701554635	0.932039001363628	-5.1203535349747
O95425	SVIL	-0.0592925263491671	3.30579946079943	-1.75609236831056	0.126891871482657	0.932039001363628	-5.12122840993736
Q5JXC2	MIIP	-0.0499503897277526	3.29502207040109	-0.315699530446891	0.762356687929708	0.964428796659054	-5.12192023588474
Q15562-3	TEAD2	-0.110270168355102	3.30013815500951	-1.02124362071312	0.344481628212194	0.932039001363628	-5.12242226373676
Q9P2E3-1	ZNFX1	-0.0775473931003437	3.31362238124036	-0.682019220066966	0.519331665112963	0.936227241329345	-5.12272256104934
P09017	HOXC4	-0.0827301052254758	3.29139484658106	-0.789425893619124	0.458335250024227	0.933352645533893	-5.12276167470515
Q8N720-3	ZNF655	-0.111905148005988	3.27252859721411	-1.10656942725771	0.308653396615583	0.932039001363628	-5.12303261104202
O75581	LRP6	-0.0435665415446086	3.353448871619	-0.299685460917608	0.773991928689294	0.966591892494208	-5.1246951361992
P04179	SOD2	-0.0641356715228972	3.24083714402917	-1.61145406978656	0.155508972408867	0.932039001363628	-5.12505855103063
Q96EW2-1	HSPBAP1	-0.0988620619850226	3.27770773266105	-0.859696990560641	0.421240324967096	0.933352645533893	-5.12507589065526
Q96MX3	ZNF48	-0.118349839291612	3.31054633108896	-1.3831687614988	0.21331109686204	0.932039001363628	-5.12547464241377
Q9NV96	TMEM30A	-0.0799984308277156	3.3436753825831	-1.20345793795775	0.271762999368678	0.932039001363628	-5.12763272741286
Q9NRA0-5	SPHK2	-0.0305638726904578	3.30516805875509	-0.249961460377446	0.810513366445856	0.977493103585679	-5.1285087140736
Q96N46	TTC14	-0.0826990123192477	3.32649448852198	-1.33071159708511	0.229100803388206	0.932039001363628	-5.12892252504597
Q96JC9	EAF1	-0.0717109462317522	3.30592429035514	-1.41864420179067	0.203194808302354	0.932039001363628	-5.12919669084403
Q13227	GPS2	-0.0655738842422473	3.33418492102388	-1.38771850539051	0.211988736289033	0.932039001363628	-5.1298112059566
Q8TAD4-1	SLC30A5	-0.084551704629239	3.3441311200821	-1.02820982631162	0.341436256028123	0.932039001363628	-5.12983470419814
Q5W0Z9-1	ZDHHC20	-0.0285861288804714	3.29843801133328	-0.216104012595675	0.835686687668497	0.979435254594733	-5.12990220382318
Q9UKT4	FBXO5	-0.105781196713042	3.07395217960639	-1.59176975658952	0.159849117949127	0.932039001363628	-5.13089588613992
P53041	PPP5C	0.0642821679959071	3.35364300445595	2.05072884129583	0.083591753666371	0.932039001363628	-5.13125343989976
Q9BYC9	MRPL20	0.139616465100883	3.26436528114847	1.49235396688365	0.183559082221845	0.932039001363628	-5.13213225446863
Q96QD5-1	DEPDC7	0.0820944038589012	3.36163921770899	0.733180530570626	0.489636437530696	0.933757352657148	-5.13278178983984
O14771	ZNF213	-0.0202505540286905	3.24938963197739	-0.143315787667055	0.890483950712812	0.987205987935372	-5.13342075491043
Q8WUF8	FAM172A	0.0649672332000015	3.30424313073107	1.3178716974133	0.233120856110334	0.932039001363628	-5.13496009971393
Q14153	FAM53B	0.0941232637865773	3.29101428269817	0.649878154082277	0.538571369694898	0.936227241329345	-5.13499434209076
Q9NZN3	EHD3	0.109612192117828	3.35012366920758	1.00912189063914	0.349832366929922	0.932039001363628	-5.13550524687091
Q15048	LRRC14	0.0950274769157108	3.39791754460365	0.891030906267222	0.405425159778519	0.933352645533893	-5.13630611751426
P51511	MMP15	-0.0914616343480511	3.37572920888448	-0.991853877610146	0.357568257022466	0.932039001363628	-5.13715040334957
Q15063-1	POSTN	-0.131902338623095	3.30153427934309	-0.624820350977675	0.553877484897019	0.938225561925353	-5.13749720435414
Q8NCH0	CHST14	-0.0654932708902509	3.35937991581316	-0.580540126661397	0.581566448292769	0.945185995875172	-5.13761930134877
Q96EY8	MMAB	0.0964993947122862	3.26470493388917	1.17880545433398	0.280776718015235	0.932039001363628	-5.13837975459198
Q9H6P5	TASP1	-0.0569148736989306	3.33587972076501	-0.463321951798173	0.658599955740741	0.956862984969925	-5.13916368714839
Q06587	RING1	-0.0933606202928487	3.31113899167532	-1.5671436419266	0.16543962539564	0.932039001363628	-5.13925771726827
Q2TAZ0-3	ATG2A	-0.0715333462563667	3.33671912256485	-0.890900223699107	0.405490188890983	0.933352645533893	-5.14008715260847
P32856	STX2	0.26679152358154	3.35184934875101	1.30327048440596	0.237768099790651	0.932039001363628	-5.14062680703253
P17676	CEBPB	-0.0927721722167183	3.18583056649116	-1.12930579438309	0.299640465590683	0.932039001363628	-5.14118916967378
Q6ZN18-1	AEBP2	-0.11275768684257	3.30173811237332	-0.94129609182115	0.380989700345147	0.932638287289909	-5.1419213284369
Q8NBJ7-1	SUMF2	-0.186703300478888	3.38885487608325	-1.60859663453166	0.156132020000037	0.932039001363628	-5.14285445018917
P35998	PSMC2	0.0569076628494796	3.35232609868134	2.2004527101876	0.0676199821886674	0.932039001363628	-5.14302402983618
O15484	CAPN5	-0.0781093913773712	3.38501904659358	-1.08731041469801	0.316462014788279	0.932039001363628	-5.143347649127
P43362	MAGEA9; MAGEA9B	-0.170580593576094	3.26730953036544	-1.44451350397683	0.196094552826149	0.932039001363628	-5.14391684687112
Q9P2D1-1	CHD7	-0.0611614730186434	3.28352306689112	-2.19485300662121	0.0681574310518722	0.932039001363628	-5.14444957005571
Q9BX66-12	SORBS1	-0.0635786718471119	3.32684061445857	-1.4908588328519	0.18393941091003	0.932039001363628	-5.14517339602775
Q8NCY6	MSANTD4	-0.117332537482604	3.32611767488425	-1.22024370526901	0.265768053511155	0.932039001363628	-5.14625942645282
Q9H668	OBFC1; STN1	0.0150435823130376	3.27858064669527	0.111341490777362	0.914784180957721	0.989037778170583	-5.14694495865983
Q92626	PXDN	-0.111424175299465	3.39763370154111	-1.21501473128084	0.267623268385319	0.932039001363628	-5.14776662528971
Q9NXR7-2	BRE; BABAM2	-0.108890071417257	3.29509493586294	-1.55951349116693	0.167208703494317	0.932039001363628	-5.14802070776781
Q96BR5	SELRC1; COA7	-0.14504229775585	3.31769995285674	-1.66167006532691	0.144937131881324	0.932039001363628	-5.14824880106207
Q6VEQ5		-0.0589953398702558	3.3269130155387	-1.60772511306673	0.156322519537475	0.932039001363628	-5.14936620225442
Q99717	SMAD5	0.0818422014118747	3.3480315720119	1.62217347106732	0.153192572553541	0.932039001363628	-5.1501437254911
P23458	JAK1	-0.0760645156061537	3.34425676095229	-0.993334177640341	0.356899857985435	0.932039001363628	-5.15197029568648
Q9UID3-1	VPS51	0.0865815958084962	3.31731031267261	1.62931939001378	0.151666584340788	0.932039001363628	-5.15274590536214
Q9H967	WDR76	-0.0512560968030903	3.30581431336379	-1.85624399215304	0.110135099231812	0.932039001363628	-5.15320358801323
Q8NBZ7-2	UXS1	-0.0679382567649804	3.36186981915587	-1.27564608379903	0.246783898802958	0.932039001363628	-5.15424473493511
P98194-7	ATP2C1	-0.0728399434367071	3.32964959409897	-1.59303466609685	0.159566819723202	0.932039001363628	-5.15512209119616
Q5W0Q7	USPL1	0.0867367235525716	3.22023204237228	0.654850624214619	0.535565770711939	0.936227241329345	-5.15533267584959
O94811	TPPP	-0.0990371366290486	3.2522754507382	-0.639302691822553	0.544998755163066	0.937929036077941	-5.15589332332122
Q86WC4	OSTM1	0.0902239706072499	3.40802905202365	1.04934021799086	0.33233053731451	0.932039001363628	-5.15619399710471
Q9NZ72	STMN3	0.0752518256941106	3.36851428463106	1.13099122492374	0.298981145262028	0.932039001363628	-5.15690890165398
O15417-1	TNRC18	0.0468217109437808	3.24705782244026	0.394479088340354	0.706145054639231	0.959887803533645	-5.1571492418207
Q9GZX9	TWSG1	-0.15314741091092	3.30990046936241	-1.05528586419677	0.329803958341513	0.932039001363628	-5.15718309950345
Q5H9S7	DCAF17	-0.0784351743856444	3.27925003537707	-1.09165769011976	0.314685361996988	0.932039001363628	-5.1574566055602
Q9UJC5	SH3BGRL2	-0.0800136324030225	3.3469329712749	-1.189735791508	0.276749338081583	0.932039001363628	-5.15804066326907
Q96AA8-3	JAKMIP2	-0.109290356248538	3.27195549962299	-1.41750359543859	0.203513184449438	0.932039001363628	-5.15817478526225
Q06547-3	GABPB1	0.059410039188219	3.33462048042686	0.559387824664558	0.595075238257033	0.945551680059626	-5.15823847744745
P09172	DBH	-0.157205998663741	3.38120088793113	-1.7583811970743	0.12648255605722	0.932039001363628	-5.15857773076421
O96020	CCNE2	-0.0090613926488018	3.00770783607017	-0.0685619723678054	0.947447912405348	0.9925140239855	-5.15861994267682
Q9Y2H5	PLEKHA6	-0.070280666597133	3.30588869752531	-1.35429580056458	0.221877067657272	0.932039001363628	-5.15882754461412
Q96EB1-1	ELP4	-0.0843024695717121	3.32172970855812	-1.3764865142162	0.215266723144524	0.932039001363628	-5.15901312609883
Q9Y3L5	RAP2C	-0.0846678867821824	3.37820025017256	-0.830482115260691	0.436389432093278	0.933352645533893	-5.15941672429892
P62158	CALM3; CALM2; CALM1	-0.211749771397264	3.29691604552305	-2.12743747398091	0.0749803492024618	0.932039001363628	-5.1595353492226
Q9Y2K2	SIK3	0.144420021177598	3.37504378611546	0.778389694833165	0.464364753201783	0.933352645533893	-5.15989217196287
Q8NBK3	SUMF1	-0.0785884646566292	3.30136482722639	-0.642921944027051	0.542793748075031	0.937696691824182	-5.16002396808199
Q96M94	KLHL15	-0.0721178782949192	3.22126561946151	-1.16801113077281	0.284802640178238	0.932039001363628	-5.16018169001125
Q8WVL7	ANKRD49	0.0677503658718466	3.35535107826763	1.16792212741282	0.284836037284179	0.932039001363628	-5.16097233942635
Q12926	ELAVL2	-0.070453816385096	3.33233570247286	-0.923140349507629	0.389683093317997	0.933352645533893	-5.16102721409091
Q96B45	C10orf32; BORCS7	0.211659147374753	3.21500420667635	1.24176309693007	0.258249146530982	0.932039001363628	-5.16104896796583
Q53TQ3-2	INO80D	-0.0327539807648109	3.29864509108397	-0.285256029784553	0.784530648827788	0.969133379989587	-5.16136764465749
Q15390	MTFR1	-0.0693750404441716	3.35368710790015	-1.50143462157636	0.18126473328592	0.932039001363628	-5.16263831178518
Q96P71-1	NECAB3	-0.0999350553286577	3.30414564883968	-0.952262748788849	0.375811110795503	0.932085238525102	-5.16269757047843
Q96AQ8-1	CCDC90A; MCUR1	0.156935308576507	3.31042382451877	0.818325000318541	0.442807969502949	0.933352645533893	-5.16271303572091
O75618-2	DEDD	-0.0873652829508081	3.08316047302836	-0.640548227016503	0.544239292873589	0.937929036077941	-5.16279587867507
P00813	ADA	-0.02510599462141	3.26460461597319	-0.154929664080709	0.881687756380672	0.987205987935372	-5.16418543752282
Q8NEY1-5	NAV1	-0.0718642346563713	3.2840961725976	-1.04710541560641	0.333284239048621	0.932039001363628	-5.16427193693475
Q9BYT8	NLN	0.0943843590674274	3.35107028081825	2.1088865026694	0.0769769228099322	0.932039001363628	-5.1645546425499
Q9UBB5-1	MBD2	-0.0771045871406385	3.28817100231523	-1.27243786822328	0.247850136743421	0.932039001363628	-5.16455813721642
Q15758-1	SLC1A5	-0.0911796099129293	3.32671747054653	-1.06436829321148	0.32597444884759	0.932039001363628	-5.16500060093035
Q7L5Y1-5	ENOSF1	-0.0102085727527912	3.32030198831011	-0.0686965910118446	0.947344916007553	0.9925140239855	-5.16524323104107
Q99733-2	NAP1L4	0.0600845371764083	3.33669489551943	2.14448690148477	0.0731917437702244	0.932039001363628	-5.16628755251738
O60568	PLOD3	-0.15220381084231	3.39243477781826	-1.76439958237804	0.125412377194103	0.932039001363628	-5.16805316090801
P57721-1	PCBP3	-0.0770049746568331	3.30320953817921	-0.870039061952388	0.415970838177055	0.933352645533893	-5.16853543036524
Q99536	VAT1	-0.043770415543245	3.30618324033986	-1.98387172197863	0.0919063547434391	0.932039001363628	-5.16857737798288
Q16134	ETFDH	0.10844008794649	3.2782759024834	1.01197678095015	0.348566264642039	0.932039001363628	-5.16865769567625
Q9H6E4	CCDC134	-0.148464697462415	3.3824105959697	-1.38357301394754	0.213193302856586	0.932039001363628	-5.16916167223925
Q9BQS8-4	FYCO1	-0.0540489174363492	3.31323496684055	-0.474111057614966	0.651295380408318	0.95584681071337	-5.17035455098771
Q16877	PFKFB4	-0.064030372613528	3.11073115768388	-0.55870365791362	0.595515160562833	0.945551680059626	-5.17064285823506
Q96B02-3	UBE2W	0.0693345277765814	3.32855094995713	0.57776597858537	0.583327897959897	0.945185995875172	-5.17118458693629
Q8IZE3	SCYL3	0.0167049537174125	3.29033600750489	0.139702004240896	0.893224493419331	0.987452608558008	-5.17130277109672
Q96BZ8	LENG1	-0.0688276869936272	3.33331604402818	-1.28687813880964	0.243082525816681	0.932039001363628	-5.17132969215216
Q96S66	CLCC1	-0.140852324413033	3.34347106022006	-1.07936686651342	0.319729626013322	0.932039001363628	-5.17176854298534
Q9H7F0-1	ATP13A3	-0.0769994815481785	3.3145408891578	-0.840721813546303	0.431035440201861	0.933352645533893	-5.17191895407106
P57060	RWDD2B	0.00738322552282314	3.35577840284599	0.064634782272834	0.95045307110166	0.992778542302589	-5.17214821292154
Q5JTZ9	AARS2	0.119798034477088	3.27500569344334	1.36703338227604	0.218060797271441	0.932039001363628	-5.17233924007108
Q5QJE6	DNTTIP2	-0.066504174756629	3.3125111774666	-1.91548396041463	0.101266809986901	0.932039001363628	-5.17264751880377
Q8N2Z9	APITD1; CENPS; APITD1-CORT; CENPS-CORT	-0.0789582352594377	3.30843583830912	-0.956705724786218	0.373728597884385	0.932039001363628	-5.17370818552149
Q8TDB6-1	DTX3L	0.0636161424221634	3.33140129867463	1.05066312625303	0.331767024731988	0.932039001363628	-5.17380966113813
Q99442	SEC62	-0.107392654003688	3.38421096596892	-1.44268590659303	0.19658863911774	0.932039001363628	-5.17534625443336
O14763	TNFRSF10B	0.0302691003471057	3.34905415370577	0.20617756822427	0.843108762782761	0.980485264119395	-5.17564031243122
Q9P2M4-1	TBC1D14	-0.0879333054963349	3.27785684024551	-0.958792180900318	0.372753717603678	0.932039001363628	-5.17579753166071
O43822-4	C21orf2	-0.0299643783240817	3.28850617587939	-0.271751734683351	0.794438743129076	0.972468581242243	-5.17589695806682
P54289	CACNA2D1	-0.121496080753893	3.36652706962345	-1.78566361041289	0.121701210719687	0.932039001363628	-5.17681595342269
Q9UIS9-12	MBD1	-0.0686744575291007	3.27180522760743	-1.04299178245723	0.335045498807314	0.932039001363628	-5.17767417765498
P51570-2	GALK1	0.0743194253890795	3.33456141591242	1.1902835671718	0.276548804252562	0.932039001363628	-5.17833221686628
Q8TCB7-1	METTL6	0.115096220379691	3.35687952003349	0.872372672833804	0.414788567168527	0.933352645533893	-5.17892565721446
P84090	ERH	0.340896272954862	3.28100945570392	1.95990999522254	0.0950837193960895	0.932039001363628	-5.17968719057353
Q6ZNJ1-1	NBEAL2	0.0808655211008419	3.32736957301809	0.824143030928914	0.439727857811439	0.933352645533893	-5.18011505378303
Q8NFZ4	NLGN2	-0.0727860723142051	3.38882667989376	-0.654845504993142	0.535568859572768	0.936227241329345	-5.18027708924436
Q96SB3	PPP1R9B	-0.0817565993285061	3.32910928350348	-1.71940752551863	0.13362981857359	0.932039001363628	-5.18088703815179
Q9H5J0	ZBTB3	0.0152833118461057	3.25887839651373	0.108257028874299	0.917134095006869	0.989867412100307	-5.18180705362749
Q96NG3-1	TTC25	0.00153274131201628	3.31321296903382	0.0107411181615582	0.991759754818711	0.998194216703487	-5.1821802264469
Q53T94	TAF1B	-0.0820310121122829	3.28801374257044	-1.28059617401425	0.245146624629572	0.932039001363628	-5.1825808048406
P30291-1	WEE1	-0.0511478086180549	2.98404929797674	-1.54399831057853	0.170860702655234	0.932039001363628	-5.18332774642922
O75970	MPDZ	-0.072920962662233	3.30213047949297	-1.86113643537721	0.10937456868886	0.932039001363628	-5.18349199975007
Q8N567	ZCCHC9	-0.0883011927888381	3.35208618801261	-1.26299243720326	0.25101267453887	0.932039001363628	-5.18366640923396
Q8TAP8	PPP1R35	0.0641305255465626	3.29636830628459	0.712847104470687	0.501300235858138	0.936227241329345	-5.1838477526424
Q03113	GNA12	-0.0757338846890606	3.32695279605979	-1.11021809949774	0.307192082747005	0.932039001363628	-5.18442769599187
Q63HK5	TSHZ3	-0.062824000490729	3.28852771653362	-0.708081270195386	0.504060520331699	0.936227241329345	-5.18454215316343
Q8NEH6	MNS1	-0.0383633397753992	3.23653876493835	-0.292761721695179	0.779042429137258	0.969133379989587	-5.18490704074149
P52739	ZNF131	-0.0786551309440862	3.29785703194208	-1.177187278229	0.281377155259865	0.932039001363628	-5.18501619305957
Q04721	NOTCH2	-0.0799492538114379	3.3615344728745	-0.380740707704602	0.715816860660082	0.959887803533645	-5.18614395287302
Q8N766-1	EMC1	-0.203129323249613	3.38089076844413	-1.61703296845263	0.154299298013159	0.932039001363628	-5.18617037932671
Q9BSR8	YIPF4	-0.107558844963414	3.33314703036361	-0.951826273295329	0.376016178036084	0.932085238525102	-5.18651685481775
Q9H7D0-1	DOCK5	0.0680954801722213	3.31378349359124	1.24126551951413	0.258420903532324	0.932039001363628	-5.18690792333363
Q9Y3X0	CCDC9	-0.0673253272767386	3.31201211883836	-1.51403177467047	0.178125830323982	0.932039001363628	-5.18692148396059
Q9UJY1	HSPB8	0.0657652457573265	3.37955859432207	0.453912607043728	0.665003880712347	0.956862984969925	-5.1869512982635
Q8WV44-1	TRIM41	-0.0619317582056198	3.35581791437541	-1.09783283258922	0.312175782489535	0.932039001363628	-5.18695895831142
Q9UMX3	BOK	-0.0858016873075706	3.34717685276354	-0.813095466249909	0.445589663274418	0.933352645533893	-5.18794342239732
Q9UDW3	ZMAT5	0.0947612538563491	3.35457131936236	0.766963788946421	0.470665093896014	0.933352645533893	-5.18797531635835
Q8N5C8	TAB3	0.0404492386345647	3.26196706116071	0.350978953085617	0.736963828744548	0.959887803533645	-5.18822992490924
Q96EZ8-2	MCRS1	-0.060514902582451	3.27169516774733	-1.53634633135594	0.172689152527449	0.932039001363628	-5.18823470365241
Q96K80	ZC3H10	-0.116022986086589	3.29489623404042	-1.17930143840835	0.280592896769244	0.932039001363628	-5.18876353555036
Q9UL46	PSME2	0.149891836281304	3.37012339863237	1.58170249325205	0.162112725222753	0.932039001363628	-5.18887278392518
P24385	CCND1	0.100496956482627	2.58658649712543	1.4428690323087	0.19653908032795	0.932039001363628	-5.18909139439103
Q03393	PTS	-0.00819169986636451	3.34558433384306	-0.059973179303619	0.954021357390358	0.993955489026343	-5.18967757477822
P51161-2	FABP6	-0.105650547513577	3.33067961549906	-1.29128051694606	0.241645112268961	0.932039001363628	-5.19063784773749
Q13057-2	COASY	0.129844674882832	3.37151028314416	1.20588183477949	0.270890227437391	0.932039001363628	-5.1909945702973
Q15831-1	STK11	0.0798657905423339	3.35133845721812	0.760963959398331	0.47399699143839	0.933352645533893	-5.19107047510613
Q99598	TSNAX	0.0398055877439846	3.35079253305632	1.96521073129338	0.0943715239944295	0.932039001363628	-5.19147566193754
Q96C00	ZBTB9	-0.0819910799672155	3.33151127309813	-1.05132691142281	0.331484566306395	0.932039001363628	-5.19162685598866
Q9Y575-3	GPR75-ASB3; ASB3	0.0646562498859877	3.24053706643667	0.614137262063772	0.560483477130516	0.941162731021168	-5.19201848916758
Q8N0V3-1	RBFA	0.0825358831666501	3.23488594200372	0.810742268297351	0.446845431238322	0.933352645533893	-5.19216689426139
Q8N3D4	EHBP1L1	-0.0373300902406996	3.34405701067746	-0.256636595738104	0.805578074074942	0.976777258538604	-5.19225574932923
Q9H9P8-1	L2HGDH	0.100398226792862	3.26408123262408	1.03393636483006	0.338948975587745	0.932039001363628	-5.19264030314586
Q9UK33	ZNF580	-0.0151296665457363	3.34939983370346	-0.100840123479717	0.922788367867106	0.990914023365218	-5.19265473072609
Q9NTX7	RNF146	-0.0626143459582985	3.41844649257717	-1.17422315558833	0.282479838500267	0.932039001363628	-5.19486347040436
Q6ZNB6-1	NFXL1	-0.0872870827111439	3.36109768997966	-1.12770549929254	0.300267602444499	0.932039001363628	-5.19494387736856
Q5TEU4	NDUFAF5	0.0700052941555626	3.2866088461634	0.60192411701463	0.56809379422309	0.943194625123273	-5.19522298940873
O00559-2	EBAG9	-0.0770652824865086	3.34876588136759	-0.71422519412758	0.500503940364103	0.936227241329345	-5.19594784929763
Q6P087	RPUSD3	0.138905918211681	3.30612123821893	1.09657712860363	0.312684763261568	0.932039001363628	-5.19640615063666
Q9UJF2-2	RASAL2	-0.0589214387311158	3.3159695778966	-1.71903781877864	0.133699450108389	0.932039001363628	-5.19660156478573
Q9NYJ8-1	TAB2	0.0620742038862947	3.3452203784857	1.20779886472703	0.270201662230573	0.932039001363628	-5.19661803395296
Q96M89-1	CCDC138	0.0772697486404526	3.3503121953034	1.46512382044776	0.190600731415172	0.932039001363628	-5.19697332595182
P62273-2	RPS29	0.0714867940140296	3.37020555628619	1.32403188312784	0.23118442232097	0.932039001363628	-5.19732766756886
Q96LB3-1	IFT74	-0.0467070130985531	3.33564003410635	-1.71558840599725	0.1343508082886	0.932039001363628	-5.19747209416713
O75787	ATP6AP2	-0.0733704614367868	3.36518361099351	-0.65446995885025	0.535795489058237	0.936227241329345	-5.19898230459118
O95625	ZBTB11	-0.0902300826523799	3.27253812987277	-0.959810538944467	0.372278613202128	0.932039001363628	-5.19914422322381
Q9NQX7	ITM2C	-0.0975455450390412	3.33633978802857	-0.96842094763392	0.368280261338335	0.932039001363628	-5.19970336478182
P46199	MTIF2	0.0944785776049253	3.2289400342302	1.31229195128781	0.234887206080955	0.932039001363628	-5.20086933473687
P55197	MLLT10	-0.118020950533054	3.29498888333017	-1.18003699447801	0.280320473435269	0.932039001363628	-5.20094733080356
Q9HAJ7	SAP30L	-0.0942138524871354	3.25294042534002	-1.01188345443885	0.34860759601283	0.932039001363628	-5.20102649620998
Q8TF68-1	ZNF384	-0.176642761588696	3.3311509507973	-1.11917258268829	0.303630013974733	0.932039001363628	-5.2019513826358
Q9NSB8	HOMER2	-0.0772876899292772	3.30059816706472	-1.08786324130832	0.316235629045358	0.932039001363628	-5.20299898917296
Q9UQF2	MAPK8IP1	0.00461103146829302	3.25765857840441	0.0355917831952725	0.972701176561474	0.997788324278266	-5.20309343632818
P53814-5	SMTN	-0.0618586483983004	3.34437261250321	-0.758311460153397	0.475475167358416	0.933352645533893	-5.20407327221838
Q6P444	FAM54A; MTFR2	-0.0727858852471931	3.33373496567444	-0.905352831859591	0.398345606897329	0.933352645533893	-5.20433399130191
Q9Y252-2	RNF6	0.192284685119698	3.35235701399668	0.927875348551447	0.387401422621088	0.933352645533893	-5.20446152487306
Q8WXI2-1	CNKSR2	0.0175159230101928	3.31199552517003	0.127211289223656	0.902708977955534	0.989037778170583	-5.20466034976739
Q86UP2-1	KTN1	-0.185741242347213	3.31941191842807	-2.12108869021409	0.0756576655310063	0.932039001363628	-5.20467647217543
Q7RTS9-1	DYM	0.0702156148136742	3.2859334385348	0.810143911670544	0.447165141328628	0.933352645533893	-5.20468356661657
Q96CB8	INTS12	-0.0750982843748646	3.27873986476698	-1.64548190756216	0.148268193981977	0.932039001363628	-5.2053353011403
Q9P2F8-1	SIPA1L2	-0.0614840938699735	3.34607318557734	-0.563638734371388	0.592346050376692	0.945551680059626	-5.20533770261836
Q01970-1	PLCB3	-0.0647019633701549	3.32230334523266	-1.87025699235878	0.107970551244484	0.932039001363628	-5.20537159296846
Q9UMY1-1	NOL7	0.126740263400559	3.27196808502184	1.35530375016173	0.221572916042781	0.932039001363628	-5.20554955180728
Q8WVQ1	CANT1	-0.10855993692923	3.34762546663816	-1.41803537558759	0.203364692938385	0.932039001363628	-5.20577279452153
Q9NQT4	EXOSC5	-0.110868742907337	3.32098346467463	-1.46432111418827	0.190812029983645	0.932039001363628	-5.20649529868914
P23786	CPT2	0.144527792662789	3.28716983665898	1.45328148675057	0.193739902259885	0.932039001363628	-5.20814616595744
A8K855-1	EFCAB7	-0.175416298264035	3.24848786767529	-0.971572686495692	0.366825086117984	0.932039001363628	-5.2087670195385
O15315-3	RAD51B	-0.0414439020080192	3.33161370119174	-0.371703215284295	0.722210660318912	0.959887803533645	-5.20914974214377
Q6UWP2	DHRS11	-0.071596742722984	3.30893705883417	-0.69744917952839	0.510254481171542	0.936227241329345	-5.20957136995378
O43615	TIMM44	0.14942779524764	3.26860755853525	1.5748043761971	0.16368112890991	0.932039001363628	-5.21158882342023
P10070-5	GLI2	-0.0664041821085175	3.29957367722387	-1.32160479435613	0.231945661904146	0.932039001363628	-5.21164871506118
O95999	BCL10	0.071212512089674	3.30509934532894	1.10757798144271	0.30824889170892	0.932039001363628	-5.21166750021542
O14775-2	GNB5	-0.0316207103121934	3.31279774869304	-0.288012994545226	0.78251315605211	0.969133379989587	-5.21280562084013
Q13608	PEX6	-0.0677163450505358	3.33045002388236	-1.2190433346251	0.266192959383767	0.932039001363628	-5.2129139656816
P37840-1	SNCA	0.305633136305597	3.32601883570164	1.65552986041337	0.146192125823813	0.932039001363628	-5.21293143902671
Q6ZN55-2	ZNF574	-0.0927971622284826	3.28543149416277	-1.40913402699134	0.205863256297797	0.932039001363628	-5.21296231025788
Q9BR77-1	CCDC77	-0.056493389741828	3.18002909065435	-1.42717205385119	0.200828744536096	0.932039001363628	-5.21321304606796
Q8N5L8	RPP25L	0.0738914084435723	3.37239880285864	0.713821886847552	0.500736894786699	0.936227241329345	-5.21424826811793
Q6NSZ9	ZNF498; ZSCAN25	-0.015689443530402	3.32414001796929	-0.0919567304265132	0.929567021162951	0.991380091858874	-5.21432084268892
Q8N5M1	ATPAF2	0.105428359710153	3.33891529575624	0.914719681179399	0.393765995363044	0.933352645533893	-5.21437390159833
Q9BZG1	RAB34	-0.0772803183827391	3.34211788394385	-1.09449187320437	0.313531498213448	0.932039001363628	-5.21451519483115
Q49AG3	ZBED5	-0.0760286659756195	3.29784524915057	-0.770063657694045	0.468949984167638	0.933352645533893	-5.21458805680171
Q96EQ0	SGTB	-0.148240121621583	3.22769901242225	-1.34527098765578	0.224616990750526	0.932039001363628	-5.2160731845101
P25705-1	ATP5A1	0.0939504952514586	3.27431116566678	2.18114219134024	0.0694918635874866	0.932039001363628	-5.21616449353899
Q9HB19	PLEKHA2	0.0280220465569055	3.29455695757077	0.248368356878369	0.811692640092417	0.977767114099099	-5.21699772558519
Q15573-1	TAF1A	-0.0722180224957952	3.31905147180108	-0.571597194740664	0.587255903307971	0.945185995875172	-5.2172489362644
Q96P50	ACAP3	0.0792637460965317	3.3618286537077	0.510233703510934	0.627145945084132	0.94948906603879	-5.21729360167279
P29992	GNA11	-0.139269227547321	3.39202961555225	-1.59994371660746	0.158033159316273	0.932039001363628	-5.21750218867901
P10071	GLI3	0.0629623644625425	3.32423690951731	0.644496693641322	0.541836079510046	0.937350272115178	-5.21786867927153
Q9NUY8	TBC1D23	0.050949277591705	3.32486003547151	1.43352024166643	0.199083739331798	0.932039001363628	-5.21789477324188
P33908	MAN1A1	-0.0762269053857989	3.38684663256527	-0.825395280312148	0.43906692128101	0.933352645533893	-5.21891210633824
Q9NRG0	CHRAC1	-0.111028851486464	3.31110988928238	-1.26868027065646	0.249104074266301	0.932039001363628	-5.21904067497044
O15439-1	ABCC4	-0.0974270172055555	3.33596145691895	-1.4384391013067	0.197741145567463	0.932039001363628	-5.21991533694171
Q6NWY9	PRPF40B	-0.0559065803630048	3.27566301193215	-0.555134852264774	0.597812924400473	0.945551680059626	-5.22042810934889
Q15811-2	ITSN1	-0.0402708638996481	3.34047393817077	-1.89055450503797	0.104909399930845	0.932039001363628	-5.22066613756208
Q6IEG0-1	SNRNP48	-0.0664379869637335	3.28238523259681	-1.32469766219865	0.230975992741876	0.932039001363628	-5.22102474280438
O94868	FCHSD2	-0.0693431349388301	3.31628159691691	-1.47041709276237	0.189212740863295	0.932039001363628	-5.22180183843317
Q96RR1-1	C10orf2; TWNK	0.0603396560830309	3.24814238338496	0.572901931785118	0.586423828252721	0.945185995875172	-5.22256834522152
Q9NYU1	UGGT2	-0.078738864855121	3.31567984870417	-0.915079753118037	0.393590747785731	0.933352645533893	-5.22455001939142
Q96ME1	FBXL18	0.0799175283688675	3.30061609702338	1.45492543051312	0.193301310790406	0.932039001363628	-5.22465475733637
Q96T76-8	MMS19	0.0897592716528789	3.33037161576838	1.8195418654096	0.116008435969802	0.932039001363628	-5.22556477529104
Q6PID8-1	KLHDC10	0.0265482389898533	3.33185911605511	0.248877527737434	0.811315674819574	0.977493103585679	-5.22653103090345
Q12967	RALGDS	-0.0394220458132115	3.28794342577689	-0.291888845789106	0.779679981736435	0.969133379989587	-5.22656496857883
P49703	ARL4D	0.0150884713329395	3.01406724662349	0.111692742130769	0.914516636853993	0.989037778170583	-5.22680491148904
Q8NCN5	PDPR	0.110416038408192	3.28290393711505	1.20779626450028	0.270202595173091	0.932039001363628	-5.22712858580275
Q9NV35	NUDT15	-0.262088811488924	3.31966977155742	-1.55976443065617	0.167150241460861	0.932039001363628	-5.22810921730956
Q7L590-1	MCM10	-0.101251630013582	3.10909803381263	-1.14204549953352	0.294686782839471	0.932039001363628	-5.2284102524042
Q8N108-12	MIER1	-0.109078203399808	3.28288130863996	-1.65600428243308	0.146094790634915	0.932039001363628	-5.22881979733689
Q96QE3-1	ATAD5	-0.0919525694054211	3.22505789592546	-1.0931204209677	0.314089414419241	0.932039001363628	-5.22942670540224
Q8IU81	IRF2BP1	-0.0702955870657028	3.31458402405403	-1.77434435404037	0.123663246069958	0.932039001363628	-5.23012559294442
Q9Y244	POMP	0.271136140074102	3.15409144959997	0.985649040649329	0.360380637238485	0.932039001363628	-5.23033588095897
Q5SRD1	TIMM23B; LINC00843; LOC100652748	-0.0421140781001851	3.34596166789604	-0.231485213512273	0.824222426537748	0.979435254594733	-5.23033641385683
Q53HC0	CCDC92	0.104582291650031	3.33969199943928	1.48130375866226	0.186387233194806	0.932039001363628	-5.23048846073753
P42773	CDKN2C	0.099647776804826	3.30909264714285	1.3970967230058	0.209286299888196	0.932039001363628	-5.2308902017275
Q9H792	PEAK1	0.0190261766076196	3.28648135698786	0.150412296475573	0.885107055952367	0.987205987935372	-5.23105133857368
Q15131-1	CDK10	0.0660920943538532	3.29702161182595	0.742965090093645	0.484089273948185	0.933352645533893	-5.23171562448197
Q6ZRI8	ARHGAP36	-0.0714570695071523	3.37924955262478	-0.721940404119025	0.496061411184353	0.935933708966241	-5.23248314569102
Q96A47	ISL2	-0.0679714141525944	3.218954844214	-0.559039921454693	0.595298918392242	0.945551680059626	-5.23296247559104
Q8TBF4	ZCRB1	-0.0638530617087565	3.30251416402709	-1.38922958073828	0.211551186752976	0.932039001363628	-5.23311374190666
Q8ND76	CCNY	-0.0896883908676919	3.36069507220254	-1.08490328240092	0.317449298305038	0.932039001363628	-5.23351534441863
Q9UEE5	STK17A	0.0761646090758371	3.35966476353609	0.794479951356972	0.455592414736705	0.933352645533893	-5.2338000207784
Q6IPU0	CENPP	-0.0611532900009893	3.30553412910368	-1.12251191974482	0.302310434913865	0.932039001363628	-5.23400579718362
Q8NF64	ZMIZ2	-0.0699181473388973	3.26118444217198	-0.902822720110951	0.399589479544687	0.933352645533893	-5.23415558200447
P55198	MLLT6	-0.0321129781152604	3.33035754502237	-0.322319819608768	0.757565989990785	0.962946714653436	-5.23502652146965
Q0PNE2	ELP6	-0.0632087924884524	3.33839081994322	-1.43243983704849	0.199379744766321	0.932039001363628	-5.23692754774441
Q8TBP0	TBC1D16	0.0750963922617838	3.32416469455556	0.734853041823216	0.488685215248065	0.933757352657148	-5.23695205541511
Q70UQ0	IKBIP	-0.0721217869431948	3.31304148074129	-0.63619128625873	0.546898801230591	0.938225561925353	-5.23697221514769
P24863-1	CCNC	0.0606364417492972	3.32144293321314	1.11986894179436	0.303354445422857	0.932039001363628	-5.23805263081861
Q9UKK6	NXT1	-0.0679077821468243	3.38160276132142	-1.23642377200227	0.260097374393986	0.932039001363628	-5.23809190355592
Q9Y3D9	MRPS23	0.0769631871325463	3.27643385981098	1.32427319590947	0.23110885739972	0.932039001363628	-5.23811225136642
Q5JTC6-1	AMER1; FAM123B	-0.0238822646555453	3.25130223537075	-0.200199684927009	0.847586956906437	0.980986338897639	-5.2387059087791
O60331-3	PIP5K1C	-0.0706747067385203	3.36281303940453	-0.948310851856454	0.377670959882422	0.932529785973849	-5.23879274441839
Q93073-1	SECISBP2L	-0.0659291522812005	3.236022229114	-0.665567150007226	0.529124248658056	0.936227241329345	-5.239981309412
Q6UW63	KDELC1	-0.21437901069963	3.36507386657434	-1.62809096079736	0.151927881154956	0.932039001363628	-5.24053036757146
Q96D53-1	ADCK4; COQ8B	0.0105465517812293	3.30087075874222	0.071382111307938	0.945290463997965	0.992312966389931	-5.24072366562679
O43513	MED7	-0.102175372472402	3.29246250416402	-1.14445950609589	0.293755883903354	0.932039001363628	-5.24136654069027
Q92551	IP6K1	0.089994561575228	3.30626911887485	1.45325336479052	0.193747412902687	0.932039001363628	-5.24139236642667
Q86YV5	SGK223; PRAG1	-0.0457387907506357	3.31719820355393	-0.457893517477599	0.662290727443547	0.956862984969925	-5.24186586609399
Q8NF99-1	ZNF397	-0.0539456814804227	3.30468888551124	-0.512345728028545	0.625748915535705	0.94948906603879	-5.24206268727857
Q9NX46	ADPRHL2	0.0571475499793442	3.34212996400008	1.73354842796053	0.13099257704265	0.932039001363628	-5.24209828057151
Q9HD45	TM9SF3	-0.163670671818895	3.34413502123828	-1.62058222681965	0.153534353586468	0.932039001363628	-5.24218847583169
Q9H0G5	NSRP1	-0.0654287214397704	3.30525184418541	-1.60159870064823	0.157667858919008	0.932039001363628	-5.24227930987209
Q92834	RPGR	0.0526022984124788	3.32671288471684	0.574703058014681	0.585276313470506	0.945185995875172	-5.24250728314255
Q9Y6X8	ZHX2	-0.0618241686605716	3.31937421070214	-1.35899237473905	0.22046303916642	0.932039001363628	-5.24304258395958
Q86U28	ISCA2	0.0702127039706415	3.37676001124926	0.984575095121791	0.360869167184619	0.932039001363628	-5.2436019267311
Q7Z2W9	MRPL21	0.055230596986065	3.30423037315665	0.706685932405219	0.504870570153394	0.936227241329345	-5.24374402713609
O75054-2	IGSF3	-0.148620326337945	3.33942093877023	-1.59237990586125	0.159712888183418	0.932039001363628	-5.24450005479972
P11166	SLC2A1	-0.0628652662560215	3.25613258896913	-1.46902158047662	0.189577764869441	0.932039001363628	-5.24479666750101
Q9NSG2-1	C1orf112	0.086102566848851	3.27063076497489	1.11745194299944	0.304311809484576	0.932039001363628	-5.24495143167235
O75886	STAM2	-0.0716463017616058	3.30615114891694	-1.71168408745688	0.135091754071669	0.932039001363628	-5.24511582857413
Q9ULK5	VANGL2	-0.0746025745844881	3.37872983931062	-0.746053518838236	0.482347225653522	0.933352645533893	-5.24539839247915
Q76G19	PDZD4	-0.0573751003682895	3.23788608251994	-0.575212552230426	0.584951946735573	0.945185995875172	-5.24581410260079
Q9UGM6-1	WARS2	0.0641892535793219	3.28362967986684	0.569353808006103	0.588688184442842	0.945185995875172	-5.24598651722939
Q96LW4	CCDC111; PRIMPOL	-0.0497418045312258	3.28487142459595	-0.508419228873077	0.628347493748325	0.94948906603879	-5.24706805534868
Q8WWV3-1	RTN4IP1	0.151654696554513	3.29606840543413	1.06736835686816	0.324717461605367	0.932039001363628	-5.2476890171745
Q96GW9	MARS2	0.095353540607163	3.33920292057788	0.768218410232238	0.469970409994662	0.933352645533893	-5.24770615090027
Q9BZ67	FRMD8	0.126442313367953	3.29364329394197	1.28749584486682	0.242880388079779	0.932039001363628	-5.24813932381869
Q86TI0	TBC1D1	-0.0101672385082848	3.25475459674888	-0.0735082632977391	0.943664256992064	0.99207297104949	-5.24836007274522
Q9NS18-2	GLRX2	0.037468703961482	3.35564413229402	0.373341684333458	0.721049661335372	0.959887803533645	-5.24872684861747
P17405-1	SMPD1	-0.0582016743775077	3.34883314996309	-0.806787153648595	0.44896171766656	0.933352645533893	-5.2497780577926
Q8N5M4	TTC9C	0.096937479421502	3.38409495054544	1.124783677071	0.301415448791225	0.932039001363628	-5.25065766827001
P02462	COL4A1	-0.0665263404992516	3.36180819320871	-0.45594661153298	0.66361693387257	0.956862984969925	-5.25174986777596
Q96AG4	LRRC59	-0.137672108746036	3.37717824715884	-1.6970070295311	0.137912423273051	0.932039001363628	-5.25181893177387
Q8IX15-3	HOMEZ	-0.0462661192516377	3.31835524591756	-0.525053206310307	0.617378970322378	0.947481858072883	-5.25203803548381
O95900	TRUB2	0.0690358161861082	3.30129449538494	1.18642603844863	0.277963631169412	0.932039001363628	-5.25208355605806
O95363	FARS2	0.0943629039387507	3.31630205573823	0.71685814838548	0.498984886086588	0.936227241329345	-5.25264738412144
Q9P0J7	KCMF1	-0.104229072285349	3.34464297032038	-1.1040304357793	0.309673661203392	0.932039001363628	-5.25268586971897
P04150-3	NR3C1	-0.0753880037056914	3.30987455882189	-0.863656790504149	0.41921696366041	0.933352645533893	-5.25288462226975
Q13137-4	CALCOCO2	-0.0756919342755677	3.26500181426864	-1.77876185404562	0.122893900737055	0.932039001363628	-5.25343372222504
Q8N5D0-1	WDTC1	0.196128580157937	3.33306125708779	1.02126165756711	0.344473715263598	0.932039001363628	-5.25367258828716
P00742	F10	-0.212261484460312	3.43127707104047	-0.622049196962201	0.555586468217431	0.938237112116112	-5.25389839756564
A8MXV4	NUDT19	0.0390824759189245	3.38921963411922	0.240572277135073	0.817471241618877	0.979435254594733	-5.25412094336204
Q0VG06	C17orf70; FAAP100	0.0640961195691578	3.34614059857428	1.28991491801103	0.242090191375102	0.932039001363628	-5.25452614492411
Q9UMX5	NENF	0.144868831159739	3.39534732669613	1.46557604926784	0.190481784607709	0.932039001363628	-5.25496935371922
O00488	ZNF593	0.0435040439752145	3.33304621580729	0.40064369695973	0.701824271427064	0.959887803533645	-5.25509569542947
Q92609-2	TBC1D5	-0.0679923587406431	3.29558069004862	-1.93690709061499	0.0982368603208215	0.932039001363628	-5.25547793767561
Q7KYR7	BTN2A1	-0.0475628493237536	3.38183867566001	-0.365576149669014	0.726559301736457	0.959887803533645	-5.25636597228603
Q9Y620-1	RAD54B	0.0190429638249031	3.29113432543086	0.181393812608553	0.861714363425102	0.983150854647689	-5.25641880242276
Q7Z2Z1	TICRR	0.0958390253730855	3.23997193319758	0.985340079134048	0.360521128396756	0.932039001363628	-5.2566630500468
Q8TAP4-3	LMO3	-0.0675215110809306	3.398682042641	-1.17333639344877	0.282810433034074	0.932039001363628	-5.25709911736384
Q00973	B4GALNT1	-0.0782338570790763	3.36200969965598	-0.978013003080352	0.363865493778775	0.932039001363628	-5.25720691765435
Q9P2P1	NYNRIN	0.116407527851336	3.29532316016279	0.905076230425992	0.398481449729358	0.933352645533893	-5.25734901252195
Q9ULE6	PALD1	0.12059817213556	3.33753665464741	1.32188550273952	0.231857506225167	0.932039001363628	-5.25781217677967
Q9UKB3-1	DNAJC12	0.0768632923065711	3.28238748007649	1.09040214594289	0.315197637551062	0.932039001363628	-5.25813134578543
Q9BW62	KATNAL1	-0.0835980049737414	3.28897791453856	-1.65137240041879	0.147047742846329	0.932039001363628	-5.25815085143471
Q9BZF1-1	OSBPL8	-0.089411510233736	3.3383107583655	-1.33350030405145	0.228235860311019	0.932039001363628	-5.25870826446183
P25686-3	DNAJB2	-0.0634898655161308	3.29001404371183	-0.813346563461523	0.445455815535878	0.933352645533893	-5.25871153419352
Q96BT7-4	ALKBH8	-0.0739618271446031	3.32863808532997	-1.0374003362218	0.337451487680085	0.932039001363628	-5.25982600881919
Q2M1K9	ZNF423	-0.118472651557695	3.30994453754939	-1.52074069904913	0.176474778857015	0.932039001363628	-5.26039833730196
O95544	NADK	-0.0561530869903802	3.32295126899326	-0.761530052430195	0.473681930296342	0.933352645533893	-5.26087081323819
Q8NBP0-1	TTC13	-0.0579955275686057	3.35361037371961	-0.484430779631777	0.644347558508303	0.954187564893818	-5.26132803953379
O75208-1	COQ9	0.116101537278723	3.33199291207122	1.13123420717439	0.298886193295844	0.932039001363628	-5.26137991178483
Q6PJ69	TRIM65	0.0770316045576372	3.35332638617248	1.00885108624861	0.349952653894095	0.932039001363628	-5.26155947302585
Q9BRF8-1	CPPED1	-0.0691412890653605	3.3401498951218	-1.26152492512037	0.251507173721646	0.932039001363628	-5.2619295228322
Q96PQ7-3	KLHL5	-0.034043915386062	3.2560659553724	-0.344903218822141	0.741312475600896	0.959887803533645	-5.26250127611527
Q5VSL9-1	STRIP1	-0.0878611467610535	3.30567137857168	-1.67254430509346	0.14273974570246	0.932039001363628	-5.26350082645538
Q96F24-1	NRBF2	-0.0805915038394341	3.32198761975468	-1.25012570490019	0.255377245906242	0.932039001363628	-5.26353594212563
Q86WP2-2	GPBP1	-0.0598553859273388	3.32285307867016	-1.27267412104059	0.247771481970472	0.932039001363628	-5.2636379356816
Q13542	EIF4EBP2	0.199707994475218	3.29606540436124	1.01210378907384	0.348510022996629	0.932039001363628	-5.26388144742767
Q8N1G1	REXO1	-0.0604204134122229	3.29036138617729	-1.24369736078702	0.257582403068273	0.932039001363628	-5.26412833582846
Q12841	FSTL1	-0.143932550394981	3.3530948797492	-1.10677486855347	0.308570963903995	0.932039001363628	-5.26425215375294
Q16611	BAK1	-0.0904685040846388	3.36235889901091	-1.06887728577222	0.324086731231956	0.932039001363628	-5.26522902276546
Q9H257-1	CARD9	-0.0626798413218848	3.2959559714559	-1.54771390184033	0.169979390002435	0.932039001363628	-5.26543296084413
P78362-2	SRPK2	-0.0750334860644588	3.31330296914946	-1.5126755821819	0.178461323645983	0.932039001363628	-5.26574211532141
Q9H6X2	ANTXR1	-0.064885281924321	3.34326315912909	-0.847889423836726	0.427316172296913	0.933352645533893	-5.26645312528839
Q9UK39	CCRN4L; NOCT	0.0855980657328911	3.34461168532716	0.630479296463128	0.550397607850667	0.938225561925353	-5.26721159934631
Q14CB8-2	ARHGAP19	-0.0702396180880562	3.26124447899027	-0.810400996130482	0.447027757675335	0.933352645533893	-5.26764959653861
Q5W111	SPRYD7	-0.0344459728518794	3.29330240043341	-0.298193993979588	0.775078873308873	0.967100747037838	-5.26767161023986
Q9H040-1	SPRTN	0.0558084109661641	3.39949964990072	0.622491901963909	0.555313233925114	0.938237112116112	-5.26769307274617
Q9P2F5-1	STOX2	0.0157645015072464	3.36455960807257	0.151635743781992	0.884180732542324	0.987205987935372	-5.26795015344661
Q8IWK6	GPR125; ADGRA3	0.0166430001301119	3.35737127716125	0.139360047938109	0.893483902167362	0.987452608558008	-5.26809697867528
Q8N283	ANKRD35	-0.0597054693032357	3.23629534976373	-0.683029604937772	0.518734093488854	0.936227241329345	-5.26880181778661
Q9NXB0-1	MKS1	-0.0170561675982347	3.39338287116626	-0.160721791738672	0.877307608365852	0.985723641910063	-5.26928046805677
Q7LFL8-1	CXXC5	-0.042583130306086	3.34478929835274	-0.394114839765994	0.706400730384841	0.959887803533645	-5.26957720848867
Q24JP5-2	TMEM132A	-0.0662128814614403	3.36370792542017	-0.861132182199692	0.420506150368054	0.933352645533893	-5.27000585690389
Q9P219	CCDC88C	-0.0194416498692575	3.30951375920082	-0.155289391240896	0.881415588168955	0.987205987935372	-5.27001739228075
Q9UNA4	POLI	0.0700657679503728	3.33198786114521	0.480585432398426	0.646931974349415	0.954187564893818	-5.27032839199457
Q13099-1	IFT88	-0.0751471724334083	3.29280162158619	-1.06615464885043	0.32522551401212	0.932039001363628	-5.27078813921139
Q13618	CUL3	-0.0494838292147105	3.30016068917386	-2.05857590714007	0.0826667865352471	0.932039001363628	-5.27138061420166
Q9HD40-1	SEPSECS	-0.0610430354552265	3.3260578104199	-1.10886268548276	0.307734264672517	0.932039001363628	-5.27169945711668
P98155-1	VLDLR	-0.048243418965698	3.32691671582636	-0.295242105678641	0.777231762361232	0.968746971052924	-5.27207703671791
Q8TB36	GDAP1	-0.133687496451192	3.3720825464526	-1.12156341874521	0.302684761238076	0.932039001363628	-5.27212438712792
Q9H845	ACAD9	0.124010510362704	3.27125624187194	1.65681862272487	0.145927859873108	0.932039001363628	-5.27242851825049
Q15262-4	PTPRK	0.0310541167543117	3.42137518544382	0.180068041333276	0.862712475823392	0.983535757386532	-5.27272982404191
Q9Y2M0	FAN1	-0.0195806447861043	3.27520968178714	-0.176188049864998	0.865635113358349	0.98470596638981	-5.27298427217979
Q9BTT4	MED10	0.440432607468048	3.08389085756728	1.31914185238208	0.232720415785723	0.932039001363628	-5.27321825973772
Q53T59	HS1BP3	0.0577552243631316	3.3483418610884	1.24206181786609	0.258146079565984	0.932039001363628	-5.27327081017483
O14994	SYN3	-0.0309528830073697	3.3627612244871	-0.295249595950666	0.777226296790045	0.968746971052924	-5.27340826457117
Q8IYB7	DIS3L2	-0.0436200711606451	3.31989128897331	-1.81860477120185	0.116162345637643	0.932039001363628	-5.27376972599762
Q9NS69	TOMM22	-0.0650501247895445	3.38961473908855	-0.550209319190926	0.600992472411967	0.945551680059626	-5.2738475524631
Q9H0R6-1	QRSL1	0.157041664428824	3.28241894672756	1.43920014056048	0.197534160698069	0.932039001363628	-5.27430680070155
P18077	RPL35A	0.0906867163978567	3.33607897813852	1.57536416779503	0.163553321076939	0.932039001363628	-5.27439991177083
P50479-1	PDLIM4	-0.0667615910617872	3.33498767436614	-1.63767862754444	0.14989980363971	0.932039001363628	-5.2744623665136
Q96CX6	LRRC58	-0.0436030910770764	2.39419266147079	-0.346464762755259	0.740193820073606	0.959887803533645	-5.27463599173938
Q9NYK6-1	C21orf91	-0.0329026228314848	3.31641276461222	-0.293771106614671	0.778305401731473	0.969076725162402	-5.2747943428538
Q9HB90	RRAGC	-0.0860615188492946	3.34886192024347	-1.33958044430273	0.226360106563499	0.932039001363628	-5.27517516211748
P41162	ETV3	-0.0631758999338408	3.28931437451912	-0.596122000048903	0.571730829124835	0.943244064049557	-5.27554627639282
Q96AD5-1	PNPLA2	-0.0485800199532705	3.34527048058935	-0.429267442710599	0.681921709235182	0.958379269103404	-5.275609210247
P14174	MIF	0.186693793095965	3.37859307759085	1.27921313918368	0.245603112560964	0.932039001363628	-5.27566008197296
Q9BSW7	SYT17	-0.0652773236988104	3.37669234694096	-0.711778682214195	0.501918174893423	0.936227241329345	-5.27570060655668
O14924	RGS12	-0.0580732639712378	3.32274306383629	-1.37199939450044	0.216588953787273	0.932039001363628	-5.27647639387851
Q9UKK3	PARP4	-0.0792166475415164	2.99955075742643	-1.33461170560366	0.227891958428621	0.932039001363628	-5.27708979333467
P43155	CRAT	0.0514011540697348	3.31873654167947	0.380539579136868	0.715958885454639	0.959887803533645	-5.2777332788449
Q96IQ9-2	ZNF414	-0.0629169057654524	3.3305207482076	-0.930136005927155	0.386315667736332	0.933352645533893	-5.27784776821247
Q9BSC4-1	NOL10	-0.0939954493623162	3.32903633721866	-1.69362712940982	0.138569949159739	0.932039001363628	-5.27828845710618
Q0JRZ9-1	FCHO2	-0.0697675420548522	3.30385940168482	-1.29618418470274	0.240052818131176	0.932039001363628	-5.27863087904234
Q9C0B0	UNK	-0.0578553282149032	3.3293253183467	-1.61320011555472	0.155129415262589	0.932039001363628	-5.27867792580425
Q96IU4	ABHD14B	0.0750622256713403	3.37689099061701	1.22661475144858	0.263522587951231	0.932039001363628	-5.27871662903484
P43121	MCAM	-0.0868925447950362	3.31703214073606	-1.26325819958705	0.250923212724758	0.932039001363628	-5.27899793549505
Q8WVF1-1	OSCP1	-0.00919188275888977	3.32809424793995	-0.088840399716639	0.931946549283229	0.991380091858874	-5.27915252096145
Q9NTW7-2	ZFP64	0.0434999864307794	3.30226855011605	0.43685498858889	0.676691217413552	0.957498933183261	-5.27998122266946
Q9H8G2-1	CAAP1	-0.0460815414595589	3.33133293645381	-1.58092520263835	0.162288746446542	0.932039001363628	-5.28034634603074
Q9C0H9-5	SRCIN1	0.0476181583908627	3.35200107121378	0.466991594998678	0.656110853961192	0.956862984969925	-5.28209354845235
Q9UK23	NAGPA	-0.0361262790487655	3.34237644516159	-0.3148602592624	0.762964837339702	0.964428796659054	-5.28315541582696
Q96CM3	RPUSD4	0.0712864175592441	3.30173000591411	0.542534834981336	0.605965516668483	0.945551680059626	-5.28324510001773
Q4VC31	CCDC58	-0.127756723400753	3.33952983422004	-1.52576857174996	0.175246763648413	0.932039001363628	-5.28337415275167
Q96JE9-1	MAP6	-0.0469669516631358	3.35918147024552	-1.62224521709671	0.153177179328208	0.932039001363628	-5.28354296896369
Q9BSJ2-4	TUBGCP2	0.104221887615923	3.34959842294425	1.66636756434255	0.143983960503113	0.932039001363628	-5.28365986567975
Q96HH4	TMEM169	-0.010502359380585	3.37117452472592	-0.0942294420340306	0.927832148472382	0.991380091858874	-5.28385194884941
Q9UL18	AGO1; EIF2C1	-0.0932613297454766	3.28018966414251	-1.51836579417007	0.177057605835653	0.932039001363628	-5.28413503348325
Q9Y243-1	AKT3	0.108318330258522	3.36625029102149	1.60306523010628	0.157344821982702	0.932039001363628	-5.28464327883277
Q5T5X7	BEND3	0.0967989037096784	3.33959022671874	1.37592153033869	0.215432808263375	0.932039001363628	-5.28465934783729
Q9H2P0	ADNP	-0.054927395683329	3.3281728914081	-2.28427392919708	0.0600743533597307	0.932039001363628	-5.28492793379135
Q14919-2	DRAP1	-0.123657991964927	3.27572589302429	-1.52939530913501	0.174365903146075	0.932039001363628	-5.28512619683464
Q9H3U1-2	UNC45A	0.0841747446648237	3.32731841754543	1.9619920988148	0.0948033358409692	0.932039001363628	-5.28525143612284
P52757-9	CHN2	-0.0796224725184943	3.34424432556247	-0.761265164000073	0.473829336990649	0.933352645533893	-5.28568723318747
Q9BRT2	MNF1; UQCC2	0.0738790138034923	3.21089546993804	1.01544857074974	0.347031481818	0.932039001363628	-5.28659594135791
Q8IW41	MAPKAPK5	-0.0575186179708303	3.30709867583051	-0.863102422375197	0.419499801557666	0.933352645533893	-5.28700529330176
Q9BY27	DGCR6L	-0.0512602822724163	3.30494203457467	-0.608462480121547	0.56401188669478	0.941591961906118	-5.28705901732985
Q9NYP3-1	DONSON	-0.0461125349343146	3.27182589557062	-0.391753642375375	0.708059122064643	0.959887803533645	-5.28771623802523
Q9HBR0	SLC38A10	-0.0491048190043198	3.33654035182388	-0.620369370775793	0.556623991304639	0.938447503511508	-5.287961547646
Q9H115	NAPB	-0.062047566479617	3.32211343749884	-1.22572327213007	0.263835802501035	0.932039001363628	-5.28812528127317
P23468-1	PTPRD	-0.106576292664296	3.38004267769603	-0.748348390585111	0.481055551057964	0.933352645533893	-5.28831916012039
Q9NQZ8	ZNF71	-0.0830023698732251	3.33075992850863	-0.784512693641051	0.46101272250905	0.933352645533893	-5.2888562710588
Q99797	MIPEP	0.120731738833228	3.29662921194033	0.895321156999862	0.403294608522533	0.933352645533893	-5.28907400357888
Q96CG8	CTHRC1	-0.162002648669993	3.35289471846646	-1.07656584031428	0.320888396925581	0.932039001363628	-5.28956264038039
Q96A58	RERG	-0.0477107646899807	3.37100060597924	-0.450199195620964	0.667539683250117	0.956862984969925	-5.28962433767966
P47756-2	CAPZB	0.181440979242885	3.35759123748254	2.14852106092891	0.0727749128119279	0.932039001363628	-5.28977392578295
O60925	PFDN1	0.354371117849832	3.15858454192739	1.50763844526279	0.179712541834337	0.932039001363628	-5.29007896181899
Q13487	SNAPC2	-0.0129414425422849	3.29955333755242	-0.124309242314128	0.904915122776532	0.989037778170583	-5.29076593309741
P51606-1	RENBP	-0.117837109130635	3.37236782645309	-0.854618277689729	0.423845895596394	0.933352645533893	-5.29077255998321
O77932	DOM3Z; DXO	0.0563183258977186	3.32774283046087	0.590774806438363	0.575094932069905	0.94393337698882	-5.29116411512991
P98179	RBM3	0.0570006029013358	3.32531129625491	1.48559879204236	0.185283236516432	0.932039001363628	-5.29162388811547
Q6IAA8	LAMTOR1	0.108310890451265	3.39650447968306	1.41656471649974	0.203775592464481	0.932039001363628	-5.29281224258087
O00217	NDUFS8	0.069776463054223	3.29129641010421	1.12599768936415	0.300938078021748	0.932039001363628	-5.29287601557245
Q96DR7	ARHGEF26	-0.0379417407173853	3.30964086986886	-0.30542119834185	0.7698170503709	0.965940015813706	-5.2929309507867
P36896-4	ACVR1B	-0.101182118431728	3.46067195976921	-0.836386814333359	0.433296233283199	0.933352645533893	-5.2931899597416
P20936-1	RASA1	-0.0607197264792027	3.30462036953945	-1.5597181336963	0.167161025945133	0.932039001363628	-5.2934972937026
P12109	COL6A1	-0.132699454225173	3.35045062779564	-1.21558925782048	0.267418886884516	0.932039001363628	-5.29376771000958
P42702-1	LIFR	-0.0524242396897198	3.33948953146348	-0.489554715737386	0.640912164841106	0.954187564893818	-5.29489450950148
O15269	SPTLC1	-0.0904520027696647	3.36726582546595	-0.975280771676559	0.36511878272345	0.932039001363628	-5.29527658864016
Q9NXR1-1	NDE1	-0.0705064983873341	3.29089323097125	-1.58666691864924	0.160992737178516	0.932039001363628	-5.29581360543178
Q9UJ68-1	MSRA	0.0708311411554266	3.34011263546755	0.98402715065638	0.361118623049684	0.932039001363628	-5.29595673215816
O43313	ATMIN	-0.0203917515703278	3.28372845102507	-0.199059936350636	0.848441478951828	0.980986338897639	-5.2963336121463
Q9H920	RNF121	-0.0318409902281739	3.32422873663714	-0.291063874527432	0.780282715142556	0.969133379989587	-5.29634442341442
Q03111	MLLT1	-0.0852357870111462	3.32784339055942	-1.31910964460285	0.232730562367082	0.932039001363628	-5.2965388880549
P67812-3	SEC11A	-0.0879201568599448	3.42345760448316	-0.595089661153729	0.572379396549606	0.943244064049557	-5.2969031706589
Q7L7V1-1	DHX32	0.0246922010008206	3.29782608982507	0.220917744198715	0.832093956208526	0.979435254594733	-5.2969171432782
Q7Z3E2	C10orf118; CCDC186	-0.0631279975570479	3.32396913064064	-1.14430592397222	0.293815035418502	0.932039001363628	-5.29761521322098
Q8IY37	DHX37	0.128390822392348	3.3122559091506	1.70078795585716	0.137180431616675	0.932039001363628	-5.29787134216725
Q01850	CDR2; LOC101060399	-0.133380569802805	3.24036906463126	-1.24414514706768	0.257428263141584	0.932039001363628	-5.29796403634896
Q9HCU9	BRMS1	-0.0798426290031731	3.28925416412514	-1.27939059914804	0.245544498098926	0.932039001363628	-5.29843979937908
Q8IZ81	ELMOD2	-0.0980697437262978	3.35134313826794	-0.869591785535276	0.416197724434025	0.933352645533893	-5.2986428652337
Q86YA3-1	C4orf21; ZGRF1	-0.0610907495933319	3.26518788682191	-0.624619256249349	0.554001392529954	0.938225561925353	-5.29912477066391
Q9NUI1	DECR2	0.0815390343422143	3.38178260086585	0.51240688050988	0.625708490327309	0.94948906603879	-5.29926920978014
P63173	RPL38	0.12940582033999	3.34476686284962	1.6006180438362	0.157884220448526	0.932039001363628	-5.29969965479404
O14972	DSCR3	-0.0642638264709185	3.379809228001	-0.734132251627336	0.489095003919919	0.933757352657148	-5.30116322052846
Q92597	NDRG1	0.0312818018688326	3.26167462909408	0.240329614362124	0.817651309483074	0.979435254594733	-5.30151094126878
Q8IXI2-3	RHOT1	-0.121618223728899	3.38930710868397	-1.0482416691015	0.332799067482737	0.932039001363628	-5.30189640587775
Q15464	SHB	-0.0233041095801204	3.29790424947543	-0.187117454044722	0.857408492908116	0.982446800611883	-5.30200233670837
P09936	UCHL1	0.0976151463699159	3.34313465224943	2.40419956084024	0.0507565125291179	0.932039001363628	-5.30221359840925
Q92522	H1FX	0.0869868743929761	3.2865329000447	1.60416791929489	0.157102341035069	0.932039001363628	-5.30352216012563
Q9ULX3	NOB1	-0.0524991256530275	3.35945013749781	-1.5539824991788	0.168502144530536	0.932039001363628	-5.30443758201387
Q9ULD2-1	MTUS1	-0.0251458588293134	3.35929571266362	-0.261648145631131	0.801879108713668	0.976057374575284	-5.30446737500771
P78352-2	DLG4	-0.0577138289730291	3.32684924229663	-0.697966561391649	0.509951919200404	0.936227241329345	-5.30468336700071
Q99961	SH3GL1	0.11181336430884	3.32523482186877	1.91387102700401	0.101498649314388	0.932039001363628	-5.30475986006635
Q01105-2	SET	-0.136710067374632	3.32177423457927	-2.11697431116741	0.0760999167107948	0.932039001363628	-5.3048104612351
Q6ZXV5	TMTC3	-0.0883900756852647	3.31784468423342	-1.2279052992324	0.263069731156509	0.932039001363628	-5.30489074732964
P08236	GUSB	-0.124132850575962	3.35869059897621	-1.32368120961665	0.231294271608883	0.932039001363628	-5.30500048558023
Q86TN4	TRPT1	-0.0816322845273389	3.34100102370122	-1.22862450394031	0.262817651317825	0.932039001363628	-5.30546705389885
Q9H6Y7	RNF167	-0.0947168622324314	3.35529525463208	-0.954772640944963	0.374633574860371	0.932039001363628	-5.30567166646821
Q969K3-2	RNF34	0.100855109480791	3.38211047112086	1.20312039042466	0.271884730547453	0.932039001363628	-5.30607759645022
O75689-2	ADAP1	-0.00344714033258767	3.31662354774778	-0.0305741340291862	0.976548201325475	0.997788324278266	-5.30664180514214
Q9ULJ8-3	PPP1R9A	-0.0462603618429527	3.30152249530216	-0.46267117592985	0.659041869865791	0.956862984969925	-5.30676809499941
Q86VQ6	TXNRD3	-0.0532430098035466	3.3167352783028	-0.662907033311722	0.530718591206331	0.936227241329345	-5.30795520343645
O00264	PGRMC1	-0.0780492939424926	3.35255713763824	-1.23127345739389	0.26189099330255	0.932039001363628	-5.30838627708454
P53611	RABGGTB	-0.0805284530814582	3.32034167893148	-1.43128861050983	0.199695595034238	0.932039001363628	-5.30963416544171
P78560	CRADD	0.062866139052904	3.39304726500407	0.615842366783277	0.559425911444173	0.940903819702018	-5.30978892201935
P40939	HADHA	0.1869305694571	3.26587185794721	1.84324418382081	0.112181266915865	0.932039001363628	-5.30987448586518
Q9UEU0	VTI1B	0.101328185213653	3.33447187884337	1.14559163243047	0.293320157901497	0.932039001363628	-5.31017629966918
Q8IYS1	PM20D2	-0.0712014808636265	3.33984315694366	-1.18349471011268	0.279042865629772	0.932039001363628	-5.31052916404201
O95104	SCAF4	-0.058830071287692	3.30770156942554	-1.6576002069149	0.145767814818963	0.932039001363628	-5.31079878408223
Q16836-2	HADH	0.107272460205909	3.30108914191345	1.63230611016976	0.151033062779425	0.932039001363628	-5.31083904167835
O94761	RECQL4	0.0537247366942817	3.30248744573593	0.493534790175116	0.63825030498228	0.953267541452889	-5.31164731534195
Q14186	TFDP1	-0.0736911764660996	3.24483435628564	-1.2711952269606	0.248264203821293	0.932039001363628	-5.31185358709982
Q96FV2	SCRN2	0.0738502134812437	3.36817780716755	1.16938028246078	0.284289304327447	0.932039001363628	-5.31202226579648
P41440	SLC19A1	-0.0180463058934999	3.34878124058526	-0.167493447942006	0.872192686088143	0.985723641910063	-5.31226689534141
O15031	PLXNB2	-0.103435969307634	3.36406914062976	-1.84511569109014	0.111884407469014	0.932039001363628	-5.31229721139557
Q9NRH2	SNRK	-0.0556915820392652	3.29646888534921	-0.985107386573211	0.36062696684472	0.932039001363628	-5.31235894658892
P42694	HELZ	-0.0520817323093612	3.30500277176646	-1.72085148525459	0.13335819406198	0.932039001363628	-5.31254747723797
Q9H2K8	TAOK3	-0.06646671153214	3.33051719001979	-0.818378169726454	0.442779751482642	0.933352645533893	-5.31260857059511
Q9UPT5-1	EXOC7	-0.0352677427194251	3.30881255851396	-1.89141278525772	0.104781864350868	0.932039001363628	-5.31262089388964
O95168-1	NDUFB4	0.0080646387158894	3.37184284532878	0.0441232931545158	0.966161964606925	0.996869842417314	-5.31344807536055
Q9H9Y4	GPN2	0.00376555019729355	3.33895086388855	0.036766918027256	0.971800313067025	0.997788324278266	-5.31345904297169
Q9Y625	GPC6	-0.153142550419368	3.37573984663549	-0.98361201194607	0.361307708056284	0.932039001363628	-5.31487981675212
Q9H410	DSN1	-0.0546714088631642	3.21522718456825	-1.60562853185272	0.156781696279179	0.932039001363628	-5.31489111162132
Q8NAV1-1	PRPF38A	-0.0704240932224364	3.31534590214676	-1.40515104674938	0.206990243833371	0.932039001363628	-5.31587916073485
P22304	IDS	-0.0759858544604541	3.37189307184687	-0.605390001813967	0.565927836665067	0.943078467382953	-5.31621876266258
Q9UMS0	NFU1	0.0644263620994615	3.32115885249642	1.18271031361829	0.279332261730616	0.932039001363628	-5.31639287189548
Q49MG5	MAP9	-0.060375174739233	3.39685894070478	-0.829260515392267	0.437031354334859	0.933352645533893	-5.3168804877447
Q96K37-1	SLC35E1	-0.0137990822701899	3.29739114156324	-0.123121958214202	0.905817965891978	0.989037778170583	-5.31781557219351
Q15024	EXOSC7	-0.15294463462487	3.31879694262226	-1.57268634618592	0.164165552620872	0.932039001363628	-5.3178432560608
Q9BVM2	DPCD	0.0473124436099522	3.34104082733195	0.438914226944965	0.675275021651708	0.957498933183261	-5.31797372135005
Q6PI48	DARS2	0.16448483034853	3.27016199875813	1.69354858034011	0.138585265814093	0.932039001363628	-5.31798284909224
Q9BU76-1	C1orf35	-0.141751265740948	3.28308615673706	-1.39861192330843	0.208852609219457	0.932039001363628	-5.31862689236835
Q9H7J1	PPP1R3E	-0.0835465189050606	3.347080191896	-0.725291425565268	0.49414006054609	0.935237434720301	-5.31930493930294
Q8WVS4	WDR60	-0.0735576421682142	3.30442577150067	-1.05820805660442	0.328567890489549	0.932039001363628	-5.31933336631478
Q9H6D7	HAUS4	0.0466923207992843	3.32746015983913	1.55463581697578	0.1683488777226	0.932039001363628	-5.31947799923771
Q96P53	WDFY2	-0.0551092403405429	3.28385181728501	-0.912382381099411	0.394904998596064	0.933352645533893	-5.31956866872311
Q07820	MCL1	-0.0718269512385325	3.39546199614594	-0.74659529230846	0.482042074546986	0.933352645533893	-5.31976377825601
O14979-1	HNRNPDL; HNRPDL	-0.0497734267951386	3.32384494174126	-2.05899894805042	0.0826172148389723	0.932039001363628	-5.32039837905792
P57087-1	JAM2	-0.0998220137278653	3.36996874431125	-1.27985501968383	0.245391159423641	0.932039001363628	-5.32101287136478
Q9UBC1-1	NFKBIL1	0.00273807508350898	3.26902385968505	0.0262386807420475	0.979872741652005	0.997788324278266	-5.32102161121904
Q16665-3	HIF1A	0.286755187987446	1.47760577496804	1.07189353432993	0.322828931290573	0.932039001363628	-5.32158145979347
O14531	DPYSL4	0.0775417699385519	3.32110542649738	2.07355988368943	0.0809291185745168	0.932039001363628	-5.32189482153563
O96018	APBA3	0.0078445299950205	3.38362212952404	0.0675099455473767	0.948252853278911	0.9925140239855	-5.32240833266922
P57737-3	CORO7-PAM16; CORO7	0.0609695761568307	3.30229364489739	1.73071976256591	0.131516064933347	0.932039001363628	-5.32283849248929
Q02833-1	RASSF7	-0.0394844534297421	3.3415395567568	-0.437003808585422	0.676588821665224	0.957498933183261	-5.32311279399733
Q2KJY2-1	KIF26B	0.0325940592717555	3.29196162948988	0.327029751046314	0.754164768547379	0.961542140678866	-5.32381296236338
Q96PV7-1	FAM193B	-0.0616020481120282	3.27198528937937	-0.82674334136812	0.438356213151292	0.933352645533893	-5.32419828327546
Q92567	FAM168A	-0.0750986833707647	3.33914227321716	-0.986951792348995	0.359788721485599	0.932039001363628	-5.32429611936851
Q9BRX5	GINS3	0.0788857319875249	3.36149228109793	1.74867542533131	0.128227094123099	0.932039001363628	-5.32429921766037
P47224	RABIF	-0.0643741899743437	3.34878932500085	-0.79744454086465	0.453988916661204	0.933352645533893	-5.32466418309837
Q6NUQ1	RINT1	0.137617253242269	3.34515224415373	1.31961369904282	0.232571812410062	0.932039001363628	-5.32471226054823
Q4ZG55-1	GREB1	-0.00950681389568559	3.32676881462033	-0.092926744141003	0.928826510053917	0.991380091858874	-5.32494783343607
Q86SX3-1	C14orf80	0.0345950161582488	3.35833331443036	0.291464352814686	0.77999010046502	0.969133379989587	-5.32540278555742
Q9UJX0-1	OSGIN1	0.21020949949634	0.721265570587683	1.24170164312021	0.258270354207313	0.932039001363628	-5.32584301548818
Q9HC36	RNMTL1; MRM3	0.0924464062384975	3.27340554312776	1.14298069129592	0.294325857787403	0.932039001363628	-5.32587556088049
Q9UPN3-5	MACF1	0.0879444941908339	3.29764061414526	1.05578390041282	0.329593026706173	0.932039001363628	-5.32602631459499
O94967-4	WDR47	-0.0907840027990062	3.29390639946536	-1.22426206084083	0.264349881383873	0.932039001363628	-5.32671861791124
Q9UKU9	ANGPTL2	-0.00251953516557406	3.37282893616427	-0.0194283658879455	0.985095927487728	0.997918327736762	-5.32703584297177
Q8N2M8	CLASRP	-0.072663289730021	3.31261606165596	-1.03400290507801	0.338920159865823	0.932039001363628	-5.32737902405147
P48723	HSPA13	-0.167239042842301	3.34415011699294	-1.35210763610253	0.222538636912121	0.932039001363628	-5.3274581541239
Q7Z3V4-1	UBE3B	0.0351594684980208	3.30312273446546	0.321098309436574	0.758449053286114	0.9635207920017	-5.32750767763275
Q9NYZ3	GTSE1	-0.0561411593866116	3.253627424618	-1.41194949173026	0.20506997550195	0.932039001363628	-5.32761692783727
Q9NVA1	UQCC; UQCC1	0.111795690623193	3.20120664410208	0.72615698046017	0.493644593559659	0.935237434720301	-5.32792177677664
Q13564-4	NAE1	0.0751444633986007	3.30232165755013	1.50552651659394	0.180239557241585	0.932039001363628	-5.32897945710163
Q6P1M0	SLC27A4	-0.0645255808312037	3.37572966365957	-0.760982551334619	0.473986641741242	0.933352645533893	-5.32992839077844
Q9NQR4	NIT2	0.138834839033494	3.34777939302217	1.82210667912117	0.11558820696899	0.932039001363628	-5.32994427473385
Q9BWJ5	SF3B5	0.354090989292653	3.39863469137791	1.42446827090356	0.201576186065576	0.932039001363628	-5.33010325876972
Q14978-2	NOLC1	-0.0493874964222113	3.33128129227081	-2.2876258598823	0.0597912555189164	0.932039001363628	-5.33056635426909
Q2NKJ3-1	CTC1	0.0917355870795661	3.33907134112963	0.659683383089282	0.532654770583254	0.936227241329345	-5.33058544213025
Q9H299	SH3BGRL3	0.0905521064666846	3.32177251758951	1.37537955334187	0.215592238394642	0.932039001363628	-5.33124171808976
Q7L592	NDUFAF7	-0.055869488755704	3.31895662842316	-0.608395466957797	0.564053633352956	0.941591961906118	-5.33150222681907
Q92871	PMM1	-0.0723780294534216	3.23124153341809	-1.21031259237344	0.269301044280651	0.932039001363628	-5.33182908900984
Q7Z7L8	C11orf96	-0.0515602566662407	3.40001437516094	-0.652528450259257	0.536968087429147	0.936227241329345	-5.33187563069241
Q7L8J4	SH3BP5L	-0.00908959479770452	3.281461858197	-0.0786411527386539	0.939739546775479	0.991380091858874	-5.33255730259517
Q96A73-1	KIAA1191	-0.0696267268177282	3.34653134229248	-0.823045049912183	0.44030795876832	0.933352645533893	-5.33271710437556
P40121	CAPG	0.0580121870911847	3.34953299037864	0.694704423471149	0.511861561790902	0.936227241329345	-5.33275143131939
Q15528-1	MED22	0.0897533625658625	3.23625747112638	0.76012712567232	0.474462998074068	0.933352645533893	-5.33322403725036
Q96C36	PYCR2	0.0929264111340219	3.27392690100911	1.37912140483387	0.214493678446127	0.932039001363628	-5.33326308249958
Q53HV7-1	SMUG1	0.0592879658012882	3.37621890235726	0.484835414513067	0.644075919515842	0.954187564893818	-5.33346434818876
Q9UHB4-2	NDOR1	0.0518032774158248	3.31252917849311	0.536716959353803	0.609750793605812	0.946774117533937	-5.33365867365252
O95573	ACSL3	-0.0752000445752401	3.32113526937156	-1.42653830872808	0.201003712237431	0.932039001363628	-5.33367569145932
Q14141-1	SEPT6	0.112958302572664	3.35270880248312	1.48981556072116	0.184205226887419	0.932039001363628	-5.33444974319818
O75438	NDUFB1	0.0941442120717223	3.26122014310792	0.474568524656323	0.650986576303045	0.955655140497459	-5.33453567435875
Q5VYV7	SLX4IP	0.0548547576775281	3.28072351068139	0.625127166127974	0.553688468698578	0.938225561925353	-5.3348386933287
Q8NBR6-1	FAM63B; MINDY2	-0.051462476457769	3.32560135088905	-0.741389986179412	0.484979362953265	0.933352645533893	-5.3354426501641
Q9NYS0	NKIRAS1	-0.0535002921419169	3.34402006318899	-0.851444008942128	0.425480390307663	0.933352645533893	-5.3354762431911
Q9NVH2	INTS7	0.0982954806223425	3.33191847594149	1.54331116335804	0.171024156052854	0.932039001363628	-5.33601158859986
Q5NDL2	EOGT	-0.112803046568611	3.3552422903481	-0.881964133292694	0.4099553691803	0.933352645533893	-5.33628899736711
P39019	RPS19	0.1007494298139	3.35808044818203	2.05413146019996	0.0831893991469195	0.932039001363628	-5.33665075282935
O43818	RRP9	0.0709217650031306	3.3598624737666	1.43118052033678	0.199725274028591	0.932039001363628	-5.33672293920004
P32189-3	GK	-0.0367140680174232	3.37090766251964	-0.445730633281508	0.670597468554466	0.957094944074474	-5.33733461353084
Q8NB46	ANKRD52	0.0829799397621173	3.32035985542346	1.19135187776424	0.276158064901521	0.932039001363628	-5.33745000823991
Q9Y4D8-5	HECTD4	0.102185437748677	3.33159431658229	0.969570768503026	0.367748863058883	0.932039001363628	-5.33754146782262
Q5PRF9	SAMD4B	-0.0489559451520375	3.30170620026146	-1.56655455047626	0.165575580845544	0.932039001363628	-5.33765332585896
P42658	DPP6	-0.0429357266991803	3.33875581394923	-0.434890884331599	0.678043321546052	0.957498933183261	-5.33777387961929
Q9Y5K8	ATP6V1D	-0.0675062624899779	3.34072796938227	-1.52618149882374	0.175146263631381	0.932039001363628	-5.33844250563067
Q92947-1	GCDH	0.100796023896726	3.28615262617565	1.33756021720822	0.226981829710035	0.932039001363628	-5.33875021341591
Q8IVV7	GID4	0.171119313719526	3.40059602306856	0.842701461060223	0.430005861315553	0.933352645533893	-5.33875357620742
Q15746-1	MYLK	-0.0168258964782838	3.29230605702539	-0.161166379277673	0.87697159252773	0.985723641910063	-5.33887467887945
Q9H871-1	RMND5A	-0.055994639117632	3.35517279514058	-1.47803172292913	0.187232342591301	0.932039001363628	-5.33906372441352
P25391	LAMA1	-0.0300479660259731	3.36680502006552	-0.272955172677163	0.793554061895113	0.972468581242243	-5.33906559004699
Q92558	WASF1	-0.0689704116996514	3.33091695191598	-1.39955415677692	0.208583326688307	0.932039001363628	-5.33926226291361
Q4G0N4	NADK2; NADKD1	0.05356605365852	3.30558979507533	0.942571631640056	0.380384571412382	0.932529785973849	-5.33952641977112
Q7L5Y9-1	MAEA	-0.0498539712590367	3.33846702876388	-1.54512772673845	0.170592362504788	0.932039001363628	-5.33971021293755
P07196	NEFL	-0.0705395103316681	3.14925602671595	-1.29342581436704	0.240947363541496	0.932039001363628	-5.34131522503322
P15822-1	HIVEP1	-0.0224662270552354	3.29049931198456	-0.214717002850619	0.836722684633698	0.979435254594733	-5.3426051322799
P49757	NUMB	-0.0674692461621038	3.28109229756122	-1.01680956392838	0.34643129195234	0.932039001363628	-5.34280995992002
Q8IWB6-3	TEX14	-0.0457586004075724	3.34486214977077	-0.413600896370637	0.692781941799536	0.959887803533645	-5.34297234576826
Q9P2S5	WRAP73	-0.0216297763252992	3.31062410939162	-0.238686791673494	0.818870682030675	0.979435254594733	-5.34300202484941
Q96FS4	SIPA1	-0.0176557295239646	3.33763286612042	-0.166914194215524	0.872629963602165	0.985723641910063	-5.34318295445964
Q8N7B6	PACRGL	-0.0346788854298958	3.33927195428224	-0.332182365950751	0.7504506960701	0.96106619286123	-5.3435636581219
Q9C091	GREB1L	0.0645836202845229	3.32663967181725	0.742452295780225	0.48437893161531	0.933352645533893	-5.34369885532078
Q9Y2M5	KLHL20	-0.054107790179533	3.16940188541396	-0.458400558212555	0.661945555213	0.956862984969925	-5.34409808819534
Q8IWT6	LRRC8A	-0.0915337359201559	3.30761997267173	-1.02825338808016	0.341417280311749	0.932039001363628	-5.34427901583501
O94941-1	UBOX5	-0.0837826032609223	3.28759449678869	-0.649441637957544	0.538835725628821	0.936227241329345	-5.34462556713596
Q8N4T8	CBR4	0.0100949957560859	3.27165350588784	0.0599371803200384	0.954048917899763	0.993955489026343	-5.34470409149901
Q15771	RAB30	-0.0532047167007773	3.3752642554676	-0.655558802457041	0.535138574895963	0.936227241329345	-5.34564804127114
Q8IY31-2	IFT20	0.125454284124441	3.2300459881852	0.84364059431638	0.429518059883202	0.933352645533893	-5.34585112568626
Q75N03	CBLL1	-0.0547595350325274	3.31112384730695	-1.28132289359054	0.244907059614566	0.932039001363628	-5.34646625048499
Q8IVL6-1	LEPREL2; P3H3	-0.135269459118601	3.35257111701643	-1.22887766617886	0.262728968000176	0.932039001363628	-5.34649765153988
O15381-1	NVL	-0.0493845077598811	3.32589980880794	-1.80393213585332	0.118598391305127	0.932039001363628	-5.3467116782174
P56937-1	HSD17B7	-0.0942926413136614	3.33733612404123	-1.26673165145244	0.249756519897918	0.932039001363628	-5.34714118691803
Q9HCU4	CELSR2	-0.111581453211595	3.36266869531831	-0.863022350076938	0.419540665930385	0.933352645533893	-5.34751107904463
Q8TDX7-1	NEK7	-0.121302365187144	3.33963700393174	-1.5589726255447	0.167334775505851	0.932039001363628	-5.34773211681045
Q8NBL1	POGLUT1	-0.19373970080623	3.35521006288572	-1.45647505075469	0.192888716989447	0.932039001363628	-5.34813450896009
Q5JPH6-2	EARS2	0.123884662459009	3.27178366495771	1.13306642773739	0.298171012214855	0.932039001363628	-5.34834085006964
P55011	SLC12A2	-0.0793103722904711	3.30843213035505	-1.08127966540296	0.318940276606253	0.932039001363628	-5.34841890390372
Q8NCG7	DAGLB	-0.0745355044806265	3.32960275723971	-1.12668845663766	0.300666737178868	0.932039001363628	-5.34919729263997
O95394-4	PGM3	0.0515172766576069	3.31231339041817	1.83102825149436	0.114138036871196	0.932039001363628	-5.34920680964472
Q9HAN9	NMNAT1	-0.0752356810218203	3.34903137531897	-1.33740814206814	0.227028692145323	0.932039001363628	-5.34954599151919
Q6ZRY4	RBPMS2	0.0591069401766178	3.3979086461623	0.784922078416735	0.460789209349764	0.933352645533893	-5.34995274741983
Q7Z406-2	MYH14	-0.0717701703906226	3.31697775253209	-0.775383640083134	0.466016610988147	0.933352645533893	-5.3501564777033
O43182	ARHGAP6	-0.0415554484231678	3.30692282031402	-1.52193490555421	0.176182381852587	0.932039001363628	-5.35020608830719
Q9UHY1	NRBP1	-0.0600649502264294	3.31108727670074	-1.24817912796636	0.256043258697664	0.932039001363628	-5.35045157927472
Q9Y664	KPTN	0.032333155365759	3.33073241587427	0.362380956428429	0.728831463448039	0.959887803533645	-5.35095390684066
Q96DU7	ITPKC	-0.00616807500753411	3.27488170732377	-0.0641050625319034	0.950858491198636	0.992778542302589	-5.35168267650583
P62312	LSM6	0.089306205540311	3.37803577644023	1.43957971601359	0.197430998979873	0.932039001363628	-5.35176849972
Q5J8M3-1	EMC4	-0.100781199367326	3.38642625265739	-0.733965702242295	0.489189724656208	0.933757352657148	-5.35234381614316
Q5VWZ2	LYPLAL1	0.0695977519734826	3.36443005232236	1.26026474282791	0.251932486873916	0.932039001363628	-5.35248375829887
Q9H9L4-1	KANSL2	-0.0677291597931867	3.31072006673625	-1.38602062773664	0.212481349730288	0.932039001363628	-5.35250006240932
Q9Y2Z9-1	COQ6	0.0467506951659315	3.33795467289898	0.441472136432659	0.673517877916529	0.957498933183261	-5.3528059712181
Q9NZ53-1	PODXL2	-0.068215123366768	3.29884220823431	-0.772552159014617	0.46757626684071	0.933352645533893	-5.35281338286825
Q86VX9	MON1A	0.0503750213509434	3.34474239396431	0.660225568825757	0.532328811963853	0.936227241329345	-5.35335970925466
Q8N8R5	C2orf69	0.00206855923430657	3.323856822526	0.0207694266779203	0.984067325891083	0.997918327736762	-5.35347895036511
Q8NHY2-1	RFWD2	-0.0480474312331478	3.20810979151336	-1.30837572194509	0.236133999236978	0.932039001363628	-5.3546243211462
P61026	RAB10	-0.111002465899546	3.37349707320837	-1.33920524675757	0.226475458544406	0.932039001363628	-5.35537407143566
Q8TD30-1	GPT2	0.147005743283983	3.27458344982088	1.58986227893416	0.160275712497068	0.932039001363628	-5.35634702043008
O95822	MLYCD	-0.00211688272652017	3.31943760140925	-0.02226953708689	0.982916771685619	0.997918327736762	-5.35641665964937
P16035	TIMP2	-0.0801855017096109	3.32702005964748	-1.16780781876864	0.284878934650861	0.932039001363628	-5.35655756580729
Q8IU85-1	CAMK1D	-0.0642153025218072	3.30425906855871	-1.17443530026589	0.282400797173127	0.932039001363628	-5.35698054546987
P51553-1	IDH3G	0.11703242947001	3.27984251764633	1.06084764115847	0.327454592013596	0.932039001363628	-5.3572161664877
Q9UBE8	NLK	-0.0263845287625369	3.33071423904525	-0.261438090760882	0.802034036935569	0.976057374575284	-5.35742095728947
Q96HY6-1	DDRGK1	0.025299819444501	3.38524247103143	0.189670597989291	0.855489475872995	0.982003597396842	-5.35800213275077
Q9UID6	ZNF639	-0.117471524852783	3.25038050162945	-1.1823947393792	0.279448761894569	0.932039001363628	-5.35815277941297
Q12792-3	TWF1	-0.0959150120406677	3.32772114036343	-1.60432295824502	0.157068276342074	0.932039001363628	-5.3583592949283
P50281	MMP14	-0.0479571583877897	3.36830086244326	-0.675473854882332	0.523213539358249	0.936227241329345	-5.35876442121787
Q8N2Y8	RUSC2	0.0212136143447802	3.31627984916239	0.228396136442589	0.826521186405713	0.979435254594733	-5.3592473384742
Q9UPU7-1	TBC1D2B	0.0540315068006639	3.32736811245853	0.754329671243872	0.477700055268464	0.933352645533893	-5.3598212353344
P08572	COL4A2	-0.110517860231645	3.35351548616445	-1.05661458977242	0.329241450490568	0.932039001363628	-5.36012499261254
Q5T440	IBA57	0.0919268189517462	3.2738174705198	0.909863026161166	0.396135506674239	0.933352645533893	-5.36051581023281
O94822-3	LTN1	0.115789651542542	3.3172648109649	1.58272890111306	0.161880565309973	0.932039001363628	-5.36085027330603
Q13433-1	SLC39A6	0.0691873651259443	3.39539948079923	0.659557631955879	0.532730389413711	0.936227241329345	-5.36097632381726
Q9BVV6-3	KIAA0586	-0.0597729878957642	3.32028359030677	-1.04425128433658	0.334505446374287	0.932039001363628	-5.36109668768575
P49802-1	RGS7	0.00320766957599522	3.35319743945599	0.0313277307487199	0.975970373415894	0.997788324278266	-5.3613736663009
Q13724-1	MOGS	-0.0859880204118261	3.32776395876008	-1.36067406440695	0.219958685338429	0.932039001363628	-5.36164399494743
Q8NDZ2-1	SIMC1	0.0914683939212611	3.30587986529207	0.955321675506114	0.374376371227331	0.932039001363628	-5.36171172380438
Q96G28	CCDC104; CFAP36	-0.0801974576352096	3.28407355245049	-1.33044456387499	0.229183778747606	0.932039001363628	-5.36189656444913
Q13683	ITGA7	-0.0245814100842852	3.40916886152697	-0.202506468326578	0.845858142583085	0.980986338897639	-5.36227256162083
Q3MHD2-2	LSM12	-0.137067841200961	3.28178323840203	-1.47641233370822	0.187651906432587	0.932039001363628	-5.36227901926642
Q15853	USF2	-0.0719315302716655	3.29994475579126	-1.27798754752719	0.246008256021975	0.932039001363628	-5.3631019192074
Q9Y576	ASB1	0.011080108420592	3.2632342616725	0.0847653310397788	0.935059283599813	0.991380091858874	-5.36327675479649
Q03468	ERCC6	-0.0939736380698309	3.25177106526738	-1.01583628941341	0.346860416024351	0.932039001363628	-5.36396722755291
Q5U5X0	LYRM7	0.0194437858948808	3.24097272868804	0.194625191889548	0.851768522740816	0.981240040324064	-5.36440833916138
Q9BQK8-2	LPIN3	0.0383793257108758	3.33995766130498	0.401945273581464	0.700913528001577	0.959887803533645	-5.36467705673188
A6NI28	ARHGAP42	-0.0643126711151299	3.32875128626155	-0.873164727791213	0.414387855384379	0.933352645533893	-5.36468982060477
Q4V9L6	TMEM119	-0.0398723764603929	3.45155606442333	-0.383547175495851	0.713836389731151	0.959887803533645	-5.36491601180256
Q8IWT0	ZBTB8OS	-0.0509404421442304	3.41577513942103	-0.270486966360266	0.795368866859981	0.972715660178858	-5.36543376085691
Q9BUE0	MED18	-0.0648078562942941	3.33209842693622	-1.18704585014932	0.277735888452764	0.932039001363628	-5.36547869334177
Q8NCN2	ZBTB34	-0.0349372582455993	3.26053899297405	-0.384425011579264	0.713217411731897	0.959887803533645	-5.36571483994476
Q6PGQ7	BORA	-0.0362797273704783	3.1825945013436	-0.460382196942711	0.660597400762622	0.956862984969925	-5.3666501574619
Q53H80	AKIRIN2	0.0787623996818006	3.26329979932438	1.00515129745198	0.351599325767228	0.932039001363628	-5.36685363294014
O94887-1	FARP2	-0.0406630986948459	3.34908233368293	-0.359346018420569	0.730992429792857	0.959887803533645	-5.36702486590275
Q9BSJ5-2	C17orf80	-0.0210238472540999	3.2640583047837	-0.224220691885592	0.829631331202313	0.979435254594733	-5.36703286150572
Q86T82	USP37	0.0738920966863353	3.1246019369539	1.00103206316073	0.353439889001855	0.932039001363628	-5.36769979721246
Q86X52	CHSY1	-0.00718597471520006	3.32549821231518	-0.0282716119781134	0.978313777261016	0.997788324278266	-5.36796104565665
Q7LG56-6	RRM2B	-0.0827396589646827	3.27596200427735	-0.793492132825155	0.456127594078054	0.933352645533893	-5.36809335489998
Q96NL8	C8orf37	-0.024355727584189	3.34869755474606	-0.279568834131299	0.788698141077409	0.970280895224405	-5.36848265663846
Q9UBZ4	APEX2	-0.0449967543520349	3.2442449862221	-0.663188351830677	0.530549838637302	0.936227241329345	-5.36889002522525
Q9NNW5	WDR6	-0.0576828124582214	3.3598613487402	-1.60123559589901	0.157747937775924	0.932039001363628	-5.36908954344147
Q5VUA4	ZNF318	-0.0477119176931332	3.27829756250247	-1.83091007344002	0.114157129326247	0.932039001363628	-5.36910504647855
Q9NZ08-2	ERAP1	-0.201089154164162	3.32337010739402	-1.16214687426049	0.287010188434797	0.932039001363628	-5.36951471894608
Q96DZ1	ERLEC1	-0.210230399108066	3.35845279227558	-1.33887240793376	0.226577831413811	0.932039001363628	-5.36964280679008
P38571	LIPA	-0.10975343815593	3.35043467317815	-0.97860594216804	0.363593953857601	0.932039001363628	-5.37005738248149
Q9Y2G2-5	CARD8	-0.036548122042139	3.29660003778696	-0.371030332482489	0.722687689062981	0.959887803533645	-5.37097474322595
P12532	CKMT1B; CKMT1A	-0.0783539638541219	3.36374063709849	-1.50982109664384	0.179169378891904	0.932039001363628	-5.37261020260801
Q14181	POLA2	0.0520618972073536	3.29892816313816	1.58848793680967	0.160583739390752	0.932039001363628	-5.37319799041585
Q9UHW5-2	GPN3	-0.0533487947561665	3.31800178785007	-1.12295232519363	0.302136759514708	0.932039001363628	-5.37397529106318
Q14651	PLS1	0.0308487112250163	3.31429689498503	0.331488776353683	0.750950225761794	0.96106619286123	-5.37502630605108
Q13643	FHL3	-0.0733634351783286	3.33868829445782	-1.15918750890089	0.288129682209101	0.932039001363628	-5.37505152087355
Q96MH2	HEXIM2	-0.0114084002785894	3.27047627730564	-0.067086102429382	0.948577168557591	0.9925140239855	-5.37564191445721
Q8NAF0	ZNF579	-0.0629107512668762	3.36004045874628	-0.480048547195778	0.647293234511352	0.954341766145235	-5.37654416895077
Q9GZY8-1	MFF	0.0593268393113947	3.35449299449208	0.460510878288618	0.660509903449029	0.956862984969925	-5.37657072177574
Q96EY5-1	FAM125A; MVB12A	-0.0663849182133663	3.32479596118231	-1.35304121922089	0.22225616230554	0.932039001363628	-5.37664788614429
O75947-1	ATP5H	0.226202305392113	3.29691445579651	1.38080098458192	0.214002214226784	0.932039001363628	-5.37672401079336
Q15645	TRIP13	-0.0514178186184365	3.31694972455371	-1.5497857035466	0.169489819007664	0.932039001363628	-5.37683863892144
Q8TEQ0-1	SNX29	-0.0724290749768116	3.3135441878477	-1.14762440678083	0.29253915527411	0.932039001363628	-5.37709777932761
Q92564-3	DCUN1D4	0.0240290358656203	3.2931329547176	0.29014004806247	0.780957869524063	0.969133379989587	-5.37715374401478
Q07864	POLE	0.137859215717161	3.31971504370057	1.79171766516296	0.120664294616035	0.932039001363628	-5.37719896700945
P35637-1	FUS	-0.0784823027407155	3.32520158596145	-2.12060402865147	0.0757096256779076	0.932039001363628	-5.3775630364655
P54802	NAGLU	-0.0933994050682991	3.34796310116415	-1.21253142530812	0.268508219462098	0.932039001363628	-5.37788497642705
P61289-2	PSME3	0.0658035964003496	3.36094336392123	1.8653966205555	0.108716533230758	0.932039001363628	-5.37791259014469
Q7Z569	BRAP	-0.0372711277130333	3.33168353710612	-1.5858806022619	0.161169645607683	0.932039001363628	-5.37794915341415
Q58WW2-3	DCAF6	-0.00277101431389823	3.26748832899375	-0.0268690508336378	0.979389328270131	0.997788324278266	-5.37797261895576
Q9H0Q0	FAM49A	0.0600713994074615	3.31472561293782	0.715896291547906	0.499539463507907	0.936227241329345	-5.37884446979133
Q9H6K5	FLJ22184; PRR36	-0.0560411938364744	3.32968651505727	-0.896904988961962	0.402510194454925	0.933352645533893	-5.37901721112181
Q15032-2	R3HDM1	-0.0591103213005935	3.30372434929376	-1.46037597293197	0.191853648431146	0.932039001363628	-5.38002602400506
Q9NVE5-3	USP40	-0.0741501735719356	3.30926878913931	-1.02978963881871	0.340748621316331	0.932039001363628	-5.38062503070492
P12429	ANXA3	-0.0576735137035357	3.34165374394818	-1.06184576423324	0.327034411030166	0.932039001363628	-5.3812969296014
P49789	FHIT	-0.0371300661117923	3.29359373294113	-0.468464681609362	0.655113006232574	0.956862984969925	-5.38208062946079
Q70EL1-1	USP54	-0.0539443641032171	3.27392222985975	-1.06472845520078	0.325823337233069	0.932039001363628	-5.38240911198782
Q96DT7	ZBTB10	-0.102648545682487	3.24867269026696	-1.65196602995057	0.146925280835216	0.932039001363628	-5.38266468564418
P43360	MAGEA6	0.0554027986842955	2.75492511544277	1.19083690636625	0.276346359267021	0.932039001363628	-5.3833257585139
Q86VP3-2	PACS2	-0.0169349932248339	3.31300507324217	-0.150379140119034	0.885132162768152	0.987205987935372	-5.3837319819463
Q8TEA1	NSUN6	0.0557322657597962	3.31386419352769	1.37738720408202	0.215002190415235	0.932039001363628	-5.38383919896803
O95402-1	MED26	-0.0660770544455664	3.31112555837927	-0.780501754364481	0.463206594630309	0.933352645533893	-5.38418450725169
P49796-3	RGS3	-0.0625094013041983	3.24840513559765	-0.975412016582662	0.365058503037818	0.932039001363628	-5.38444634781763
C9JLR9	C11orf95	-0.0638249688146022	3.30506425813074	-0.641480285990335	0.543671402745114	0.937929036077941	-5.38445897275078
B2RTY4-4	MYO9A	-0.0274828735495906	3.27851913843846	-0.259941149739118	0.803138403573211	0.97631260475186	-5.38580762065881
Q8IZD2-1	KMT2E; MLL5	-0.0629615517296647	3.27246368889089	-1.00538781357076	0.351493875861541	0.932039001363628	-5.38593120032031
P27816-4	MAP4	-0.155927756903217	3.378799769825	-0.919147943719109	0.39161485434291	0.933352645533893	-5.38598269243093
P22692	IGFBP4	-0.0518962919289736	3.38474218798559	-0.631895695496603	0.549528726170379	0.938225561925353	-5.38604054269275
Q92698	RAD54L	-0.0462329526902718	3.28435893647446	-0.530885441854074	0.613558103136022	0.947020772181606	-5.38633289069349
Q9BY32-1	ITPA	-0.152262476564389	3.32092096479044	-1.29919332199619	0.239080281392817	0.932039001363628	-5.38650983222285
P46777	RPL5	0.129900665733638	3.31223197705286	2.04815113876038	0.0838978670468132	0.932039001363628	-5.38741156420089
Q9P2N5	RBM27	-0.0861916278031414	3.31614572246437	-1.77415990427779	0.123695471184708	0.932039001363628	-5.38742976687867
Q9UBU7	DBF4	-0.050714333900478	3.2956776992941	-1.25557374177143	0.253521211114124	0.932039001363628	-5.38752174835983
Q96ER9	CCDC51	-0.0975129466392066	3.36059872773035	-0.916166086090072	0.39306238557746	0.933352645533893	-5.38784895347854
Q9NX07-1	TRNAU1AP	0.0553702362950372	3.3589185543549	0.497046645276404	0.635906422929439	0.953267541452889	-5.38831802889905
Q9H426-2	RIMS4	-0.0699760740936358	3.3546664181353	-1.15077803731807	0.291330965931054	0.932039001363628	-5.38854744137758
Q9NWZ3-1	IRAK4	-0.0560289148677141	3.267129721004	-0.870727476612951	0.415621810083511	0.933352645533893	-5.38861553758704
Q86V88	MDP1	0.103872165925806	3.40710411883911	0.719983392997857	0.497185791577489	0.936227241329345	-5.38878010340768
Q9Y2Q0-3	ATP8A1	-0.0864804951088259	3.45815220048977	-0.208997241889758	0.840998659654254	0.979435254594733	-5.38888524416394
Q9HBZ2	ARNT2	-0.0576192709981616	3.1901268433214	-0.926267505805181	0.38817505600497	0.933352645533893	-5.3890894596618
Q9BRK3	MXRA8	0.0383542573151336	3.41875439432101	0.21531774749454	0.836273927738081	0.979435254594733	-5.38951711468302
O75935	DCTN3	0.0483832248180518	3.34435693624143	1.6859098555749	0.140082559571034	0.932039001363628	-5.38972305801721
Q9NWQ4	GPATCH2L	-0.00586133100839039	3.23342068773569	-0.0649121318235834	0.950240808494013	0.992778542302589	-5.38996791880857
Q8N2W9	PIAS4	0.0351243955650869	3.32005042201116	0.414114603316836	0.692424559343578	0.959887803533645	-5.39059826712663
P56524	HDAC4	-0.0491666410008731	3.32011069211533	-1.21452472163355	0.267797689832201	0.932039001363628	-5.39123284146942
Q01432-4	AMPD3	0.0449567681797694	3.30624682509219	0.546597129079094	0.603330289421505	0.945551680059626	-5.39157820410316
Q92990	GLMN	0.0838993406475126	3.29650185285144	1.36358212362135	0.219088969463935	0.932039001363628	-5.391628461537
Q6P1R3-1	MSANTD2	-0.0524186917328832	3.30343549861906	-0.690372422386172	0.514404701758646	0.936227241329345	-5.39210388733063
Q7Z589-5	C11orf30; EMSY	-0.0400293528287243	3.32251123336928	-1.71141968808435	0.135142072668214	0.932039001363628	-5.39255973503563
Q6ZTU2-6		0.0319529825104504	3.33223303064489	0.385682819090953	0.712330920927037	0.959887803533645	-5.39275225421954
Q8IWU2	LMTK2	-0.0379899058081423	3.25107561012247	-0.481193218255237	0.646523132071593	0.954187564893818	-5.39331729346941
P55211-1	CASP9	-0.0452319417942755	3.34849160201005	-0.55959343075702	0.59494306889502	0.945551680059626	-5.39375652037749
P09104	ENO2	-0.0563659610219583	3.31708872623103	-2.01317638569833	0.0881644030319058	0.932039001363628	-5.39380033896225
Q9H0W5	CCDC8	0.0202821102476928	3.32407521000528	0.221710725030801	0.831502532914384	0.979435254594733	-5.39385316477163
Q8NEM0	MCPH1	-0.0837135132334314	3.20616389890335	-0.448689662650366	0.668571870633179	0.956938658128808	-5.3941996966388
Q9Y6D9	MAD1L1	-0.057564755136131	3.31367451409966	-1.78103439436532	0.122499933522312	0.932039001363628	-5.39492331588324
Q9P273	TENM3	-0.00949284873611457	3.33923688815423	-0.0842634436298398	0.935442736649459	0.991380091858874	-5.39517468968676
P48735	IDH2	0.12134322033043	3.28257570372393	1.87455856949116	0.107314542315295	0.932039001363628	-5.39582224921898
Q5R372-5	RABGAP1L	-0.0248533631327589	3.27918850889327	-0.289746368996293	0.781245642426266	0.969133379989587	-5.39631317836435
Q13148-1	TARDBP	0.0997932995564104	3.35274106717099	1.77070433159534	0.124300702914472	0.932039001363628	-5.3965605080998
Q9NQ89	C12orf4	0.0145382512630401	3.35479584101008	0.143275060670964	0.890514827322393	0.987205987935372	-5.39660467993035
Q14684	RRP1B	0.0395723950047352	3.33738761156338	1.79585440656723	0.119960724374213	0.932039001363628	-5.39675138422218
Q9HD47	RANGRF	0.219075333291836	3.08492141481638	0.798684713033724	0.453319309421323	0.933352645533893	-5.39699361371092
O43741	LOC101060511; PRKAB2	-0.0521216371974134	3.30723393587737	-0.795656984152596	0.454955300227488	0.933352645533893	-5.3970359908318
P55210-3	CASP7	-0.0380653150487071	3.3098828459693	-0.459292049307264	0.661338883163212	0.956862984969925	-5.39738530650255
Q8NBN3-1	TMEM87A	-0.0716859471232167	3.33855501036855	-1.21169337418533	0.268807433207416	0.932039001363628	-5.39741721285565
Q9H079	KATNBL1	-0.0364409760215101	3.30658854600773	-0.271774616586224	0.79442191890424	0.972468581242243	-5.39927692637725
P42224-1	STAT1	0.082212616532194	3.31650834522156	1.79431365037273	0.120222305121632	0.932039001363628	-5.39953172118247
Q9NX31	C20orf111; OSER1	0.0632075412323259	3.37896578749227	0.956447504658665	0.373849386238757	0.932039001363628	-5.39967802508708
Q12800-1	TFCP2	-0.0664411551992753	3.3303494423522	-1.62526896818557	0.152529760083108	0.932039001363628	-5.40047231607869
Q9ULQ0-1	STRIP2	-0.034487051626093	3.33702027332572	-0.336154601533745	0.747592384118088	0.960967861789008	-5.40065318064283
Q9NQC8-2	IFT46	-0.0493424949140313	3.32200593318177	-0.733035269770638	0.489719111805623	0.933757352657148	-5.40117475116195
O15327	INPP4B	-0.043216076023082	3.29119105436478	-0.578227496121753	0.583034640973841	0.945185995875172	-5.40123348932203
Q5HYK3-1	COQ5	0.164068250397029	3.35098183534033	1.14001821772176	0.295470457585933	0.932039001363628	-5.40135139570546
Q8N344	MIER2	-0.046957173592884	3.3747878140719	-0.588673556432427	0.57642010043736	0.944950984323541	-5.40138016478983
P61129	ZC3H6	-0.0569861097405281	3.33684151177808	-0.48367520263695	0.644854950642476	0.954187564893818	-5.4015540756054
Q12931	TRAP1	0.0847030519561913	3.28243744743581	1.90325004511249	0.103038467074031	0.932039001363628	-5.40199149117103
Q9BW30	TPPP3	-0.102532426830371	3.29538512983464	-0.971990925300564	0.366632319963448	0.932039001363628	-5.4026449683523
Q8WVD5-1	RNF141	0.0332120589886118	3.30755527677839	0.384814226679697	0.712943044739803	0.959887803533645	-5.40330649322454
O43286	B4GALT5	-0.0914095497952891	3.3152321378632	-0.76316478256941	0.472772923834006	0.933352645533893	-5.40339846621555
Q659C4-1	LARP1B	-0.038324028215502	3.30508180952584	-0.398713890518578	0.703175588623146	0.959887803533645	-5.40362666943274
Q9UNW1	MINPP1	-0.154368121847274	3.36247073797878	-1.27702278992669	0.246327586861423	0.932039001363628	-5.40379977129938
Q9BT17-1	MTG1	0.11915742810749	3.30836110799207	0.93615300718523	0.383437124473172	0.933352645533893	-5.40427739385203
Q9BW66-3	CINP	-0.108510627890783	3.33565673144786	-0.912960280849387	0.39462314738129	0.933352645533893	-5.40454776019137
Q96GV9	C5orf30	-0.0281627883888072	3.23198777612688	-0.287816596367918	0.782656816043944	0.969133379989587	-5.40470356134246
Q9UIF7-1	MUTYH	0.0471795817944458	3.30268468535065	0.695032146034938	0.511669503562351	0.936227241329345	-5.40492506978913
P14618	PKM	-0.0776759621303224	3.34748457333952	-1.77903876544976	0.122845829569607	0.932039001363628	-5.4050510330156
Q70UQ0-4	IKBIP	-0.152325236789685	3.37711900200297	-1.30941935554371	0.235801172234647	0.932039001363628	-5.4054605992422
Q7Z3D6-2	C14orf159	0.0654635983204476	3.31787145671182	0.755377866003374	0.477113669885892	0.933352645533893	-5.407015909957
Q9NYB9-2	ABI2	-0.077900106163078	3.3206658521572	-1.58189818815395	0.162068437468377	0.932039001363628	-5.40758692803485
Q9H5X1-1	FAM96A	0.131425415617518	3.31924332150271	0.961560341797274	0.371463356446295	0.932039001363628	-5.40860179682641
Q9BPX6-3	MICU1	-0.108044936174872	3.31147034569323	-0.904885676428076	0.398575053748434	0.933352645533893	-5.40887347893255
Q71RC2-4	LARP4	-0.0711876866213104	3.3173919521272	-1.64890462214422	0.147557872901133	0.932039001363628	-5.40894780607042
Q14D33	CXXC11; RTP5	-0.0267129719029713	3.39962929851291	-0.217801097719544	0.834419572139793	0.979435254594733	-5.40898529407197
Q92882	OSTF1	-0.035200256220485	3.31619130154533	-0.376632628939217	0.718720171071503	0.959887803533645	-5.40908358545878
Q9Y4E1-4	FAM21C; WASHC2C	-0.0450391272914835	3.2898762728858	-0.62182235878488	0.555726502898892	0.938237112116112	-5.40931036600752
Q92542-1	NCSTN	-0.0669193896910642	3.34839628571305	-1.1198868272124	0.303347370403661	0.932039001363628	-5.40945568740517
P49821	NDUFV1	0.102920095929128	3.27730511012406	1.43414187479536	0.198913608070769	0.932039001363628	-5.40971259812656
A1L390	PLEKHG3	-0.00430440630357861	3.35988323143865	-0.0346154557001702	0.973449666710876	0.997788324278266	-5.40995108184558
Q6PHR2-1	ULK3	0.0603168328434167	3.33711147718404	0.721539176388037	0.496291794069421	0.935933708966241	-5.40999663376905
Q8IWS0-1	PHF6	0.0707800717674424	3.31177584976573	1.76215230293455	0.125810952993373	0.932039001363628	-5.41001017541468
Q96B36-3	AKT1S1	-0.0521549151281535	3.3001043215692	-0.834633168008079	0.434213229417519	0.933352645533893	-5.41038633960601
[truncated: 4,701 more rows]
