# Supplementary material for: Thalidomide promotes degradation of SALL4, a transcription factor implicated in Duane Radial Ray syndrome
Source: eLife journal article supplement (doi:10.7554/elife.38430), 2018-08-01
Supplement: supp [file elife-38430-supp-v1.zip › elife_poa_e38430_Figure_1_source_data_14.csv]

	ID	logFC	AveExpr	t	P.Value	adj.P.Val	B
Q16875	PFKFB3	2.42244042060265	3.32495275594451	58.3536235479082	1.10596883491543e-09	6.02201730685206e-06	12.932842501383
Q9UJX0-1	OSGIN1	4.26877930709332	2.75055047438617	51.458884955399	2.3953346534894e-09	6.02201730685206e-06	11.1187357573867
Q9Y6B2-1	EID1	2.7547978008296	3.25602870610656	50.4767551104169	2.6964256597845e-09	6.02201730685206e-06	10.4050819279177
P24385	CCND1	1.77387684164163	3.42327643970493	36.5092868104908	1.96995697382959e-08	2.55801326263561e-05	10.082968117387
P46527	CDKN1B	2.34552645957141	3.30198797729678	35.8930298667747	2.18671130611478e-08	2.55801326263561e-05	9.63879375658567
Q9UJ04	TSPYL4	1.42817584479883	3.48198138290064	31.5261690476656	4.8420476078216e-08	4.60433153798981e-05	9.40923872441127
Q16665-3	HIF1A	3.41017182368499	3.03931409281681	35.6219377162056	2.29075814564383e-08	2.55801326263561e-05	9.32241676810634
Q9GZU2	PEG3	1.54741676028594	3.44749597468144	30.2514028238572	6.23418152660805e-08	4.60433153798981e-05	9.25331671196194
P43360	MAGEA6	1.41224016735512	3.43334379977818	29.7108338037118	6.96155947930484e-08	4.60433153798981e-05	8.96970250672103
P30305-1	CDC25B	1.4916704099964	3.45554483540385	28.7140051675777	8.57805318500013e-08	4.78941302829174e-05	8.90909077731086
P30291-1	WEE1	0.97210029923006	3.4956733519008	27.8269858067022	1.03928187704449e-07	5.04851989578099e-05	8.8222833591237
Q7Z5Y7	KCTD20	1.28527253934201	3.46317054911863	29.3135262701777	7.55935028625193e-08	4.60433153798981e-05	8.81113007604297
P15104	GLUL	1.10733261426151	3.44727991086974	27.7591227808571	1.05491460508857e-07	5.04851989578099e-05	8.75554108466669
Q5TA31	RNF187	1.61919900476713	3.45152526075435	29.6739224979241	7.01472198460333e-08	4.60433153798981e-05	8.71429643520603
Q9UK99	FBXO3	0.8881610431201	3.44442489619866	24.560662031665	2.22838910676291e-07	8.7824747148891e-05	8.10776047270083
Q15014	MORF4L2	1.25744370713697	3.46468564452002	24.5717597205817	2.22225426949441e-07	8.7824747148891e-05	8.10751344317605
Q9ULM3	YEATS2	0.504370557053102	3.42393479168563	25.0991366253748	1.95209776082544e-07	8.71936999835363e-05	8.03998551248866
Q04828	AKR1C1	0.707875242608668	3.44023873474742	23.730384053015	2.74856932650886e-07	0.000102307858264496	7.88613789599066
Q9UBU8-1	MORF4L1	0.779671486828133	3.44736338129082	23.1952422387887	3.15868798938813e-07	0.000109193385768375	7.6698254281496
Q9NZJ0	DTL	0.983782343718583	3.46844423750773	23.0759981728146	3.25950405278731e-07	0.000109193385768375	7.66260825391257
Q13569	TDG	0.929603097126753	3.40805557029316	21.8699686712506	4.52033762130744e-07	0.00014017418228245	7.38724970751591
Q9UPT9-1	USP22	0.705843179201059	3.43321870722805	21.8051771548414	4.60273434360284e-07	0.00014017418228245	7.2526107339122
Q9H0U9	TSPYL1	1.20974239672851	3.51219471003661	21.3984237351898	5.16170046807818e-07	0.000150362578852712	7.13171649026354
O00716	E2F3	0.873531622424112	3.44817886671171	20.5414623062631	6.61850751227637e-07	0.000184766668051049	7.00683656097746
Q9H3C7	GGNBP2	1.14733013464856	3.44008994909311	20.3595066950307	6.98633034261093e-07	0.000187233653181973	6.86698055452493
O95185-1	UNC5C	0.761491438474943	3.46667072762696	19.6330952939022	8.71176910444138e-07	0.000224495588460605	6.72290804880655
Q13501-1	SQSTM1	0.604888835447521	3.43084680746948	19.353285918072	9.50502788602566e-07	0.000235865506801378	6.54045821110101
Q9HBU6-1	ETNK1	0.724026371541228	3.43528820394659	18.7039916725403	1.16913758211411e-06	0.000272830669235305	6.39140134554798
Q9H211	CDT1	2.38516955053873	3.33946497055362	18.3647230287403	1.30634570428113e-06	0.00028233923286076	6.33867074901528
Q8TEL6	TRPC4AP	1.13218174710633	3.46432205957829	18.5689930559991	1.22162986224763e-06	0.000272830669235305	6.32538606393833
Q7Z3T8	ZFYVE16	0.624432060765114	3.44431888815428	18.6338323102696	1.19608419524798e-06	0.000272830669235305	6.31726017724048
P43357	MAGEA3; MAGEA6	0.916566694481035	3.44462770168807	18.1949266364855	1.38198137904139e-06	0.00028935235123679	6.26899343258429
Q9C0C7-5	AMBRA1	0.55506021750105	3.43070372664632	17.6926912219019	1.63726239990551e-06	0.000317897764737298	6.08146337548934
Q99741	CDC6	1.01137394173407	3.47169258798951	17.6980778406744	1.6342484059674e-06	0.000317897764737298	6.05997310648292
O95863	SNAI1	0.984827798862574	3.51939030957196	17.6512622625488	1.66065996504559e-06	0.000317897764737298	6.05337158047123
Q9UDY4	DNAJB4	0.506134196184592	3.41730919661715	17.4193024134638	1.79905406422965e-06	0.00033482395084274	5.86568291750952
P41002	CCNF	1.43941446285708	3.46016474746708	17.2246839225192	1.92556361302571e-06	0.000348045326400678	5.83685600737046
Q13415	ORC1	1.35501882747929	3.45671904496371	17.0238658978189	2.06704879119915e-06	0.000348045326400678	5.8324777796319
Q9BSF8-2	BTBD10	1.04764120481391	3.4593985763861	17.0617917791669	2.03942884871546e-06	0.000348045326400678	5.74644560608216
Q9UQ84-1	EXO1	0.635223165134629	3.45246703985021	16.7785418821361	2.25655785575063e-06	0.000368754576427542	5.71542677968879
Q9UKK3	PARP4	0.86758711419429	3.47295263829433	15.820449223761	3.21767425616334e-06	0.000477013346710739	5.42879849951869
O43293-1	DAPK3	0.794190388475008	3.46568366694641	15.7622551305844	3.28993969571452e-06	0.000477013346710739	5.4134698439872
P51784	USP11	0.415272170194121	3.38013721395171	17.0091498290788	2.07788254567569e-06	0.000348045326400678	5.41271483318661
Q8TBC3	SHKBP1	0.857546748510193	3.4597160960094	15.6577702430879	3.42446352733845e-06	0.000477998034024325	5.38360971311025
P78395	PRAME	1.08396017929646	3.42394692845418	15.7179558023359	3.34621302916489e-06	0.000477013346710739	5.3645378484214
Q9HCJ5	ZSWIM6	1.07766581834375	3.4205735615418	15.9834077541047	3.02489955775181e-06	0.000477013346710739	5.33728511078976
Q9UK73	FEM1B	0.529487741197568	3.44545278894929	15.3265315764672	3.89504634585267e-06	0.000521936210344257	5.20143168006279
Q9Y4C1	KDM3A	0.803646194423645	3.43931929807253	15.853603697094	3.17732617041487e-06	0.000477013346710739	4.99099982985727
O15525	MAFG	0.795733781911238	3.42904502699232	14.9631557901027	4.49988878270321e-06	0.000591161859688461	4.96901144195593
Q86YD1-1	PTOV1	1.2274014158708	3.44178491993139	15.3671079020171	3.83354646671654e-06	0.000521936210344257	4.94765964300138
P35222	CTNNB1	0.657644425174997	3.4653881064557	15.9358221785617	3.07977308483861e-06	0.000477013346710739	4.91458421672663
Q9Y605	MRFAP1	1.22149659682599	3.46869530485705	14.5244709399916	5.38078251580084e-06	0.000667615608441956	4.88319389516934
Q8TEW6	DOK4	0.954942362831362	3.46386199537724	14.4761800362172	5.48944463413441e-06	0.000668714164521828	4.85544271396671
Q8N6I1-1	EID2	0.89227330764005	3.46074797253227	14.3217473479644	5.85439611805154e-06	0.000684897801063968	4.84467798720567
Q14693-7	LPIN1	0.436618859524308	3.41240855045397	14.8047668866535	4.79713951215422e-06	0.000618092975604486	4.83367569738874
Q14493-1	SLBP	0.874199457136701	3.42105758045452	14.2915640351891	5.92896603906121e-06	0.000684897801063968	4.79592005241515
O43463-2	SUV39H1	0.567665954545743	3.46518421964909	13.7095292512141	7.60651105298915e-06	0.000863790238220801	4.53808111218892
Q92569	PIK3R3	0.780119681380816	3.46802099048281	13.538768707381	8.19891593441697e-06	0.000897253521169848	4.51649835989913
O43791	SPOP	1.13831332351366	3.47165423177606	13.3555154765573	8.89496102082297e-06	0.000931191231867404	4.44079337744058
O15164	TRIM24	0.331265603988451	3.37388603972061	14.7071295841476	4.99170330976864e-06	0.00063102664481981	4.42737904332358
O15062	ZBTB5	1.04153761548001	3.46380539591896	13.4741607880277	8.43686146771648e-06	0.000897253521169848	4.34360062194615
Q13409-1	DYNC1I2	0.389249587181401	3.39354766946949	14.336599608108	5.81810168228664e-06	0.000684897801063968	4.18234633768467
Q96CX6	LRRC58	1.96311710878809	3.39755276140338	13.4923555103687	8.36905252683368e-06	0.000897253521169848	4.11681310091528
Q16526	CRY1	0.827402170941992	3.44743747969216	12.5808709016663	1.2704577090738e-05	0.00119739803677327	4.08936808854691
Q5TF21	SOGA3	0.3947993521591	3.39075279089325	13.5209474638636	8.26376523801679e-06	0.000897253521169848	4.04221388362132
Q9BR77-1	CCDC77	0.570963987536164	3.49375777929334	12.5943245528155	1.26239738569752e-05	0.00119739803677327	3.95882902416214
Q9H2Y7	ZFP106; ZNF106	0.410662467057821	3.43826795155366	12.6449010481925	1.23262082266365e-05	0.0011968926828763	3.90983516944726
Q9P2N7-3	KLHL13	0.761174241860071	3.44758226325599	13.0083460076886	1.04101368619662e-05	0.00107304487654113	3.885644081397
P30281-1	CCND3	0.800627121021947	3.44677316770691	11.9821105090085	1.69768797626321e-05	0.00153709587040047	3.79764153778415
P48507	GCLM	0.609831334109576	3.44874004993648	12.662574252923	1.22240801614566e-05	0.0011968926828763	3.7839311224274
Q01101	INSM1	0.838821104996038	3.50841508214125	11.8119336515918	1.84802424322536e-05	0.00158740543969358	3.71893211812996
O75147	OBSL1	0.373197176496766	3.3809048841061	12.8313184112964	1.12967077484368e-05	0.00114678699870495	3.70293656301981
Q96DX7	TRIM44	0.511390167007571	3.44568075628383	11.9147986865106	1.75539593426412e-05	0.00154803361817022	3.6414202638884
Q6PIJ6-1	FBXO38	0.411411008528003	3.40581697328458	11.9141323503906	1.75597843255129e-05	0.00154803361817022	3.56607277097016
Q56A73	SPIN4	0.748986443034389	3.45296988013575	11.5692388551336	2.08987252242278e-05	0.00177242353167501	3.50906399234217
P10244	MYBL2	0.558724536190917	3.35238264332675	11.834546240241	1.82718673851189e-05	0.00158740543969358	3.43604164522615
O60216	RAD21	0.284847281358084	3.38384202241102	12.5539661542266	1.28675609921903e-05	0.00119739803677327	3.38179336161775
P11926	ODC1	-0.942853538356636	3.12030155320607	-11.2931217879703	2.41079210048369e-05	0.00194606109316153	3.3756089740013
Q1MSJ5-3	CSPP1	0.52516146358503	3.42003833923434	11.2533692888764	2.4615370553685e-05	0.00196336884178202	3.26111075656062
Q9BX70-1	BTBD2	0.650866904329411	3.44984214962452	10.9248644429015	2.93162518303067e-05	0.00220695378947253	3.25068747074346
O94952-2	FBXO21	0.517801980873277	3.45130680612777	11.1606959788359	2.58470453045665e-05	0.00203735533577171	3.19120873877709
Q86T82	USP37	0.712689724883675	3.44400075105257	10.8645570500536	3.02879058199542e-05	0.00225476632215215	3.18558093564884
O14867	BACH1	0.738669857006204	3.43352176549078	11.3742044097345	2.31098925834954e-05	0.00188824732084657	3.1759926788094
Q96SN8	CDK5RAP2	0.345596779384155	3.40248971240739	12.1111546920315	1.59307864606758e-05	0.00146214067515791	3.09147126902541
O60333-3	KIF1B	0.441166103503081	3.45218908421335	10.9311163488945	2.92175987780898e-05	0.00220695378947253	3.02173275602507
Q9Y2F9-1	BTBD3	0.871848528389428	3.46985727616679	10.3205524447474	4.09587230286811e-05	0.00285857754471004	2.91603125971336
Q9HAW4	CLSPN	0.435601017815865	3.42800965224423	11.3900283446107	2.29207338923489e-05	0.00188824732084657	2.84743668000842
Q9Y4H2	IRS2	0.65460216219813	3.4488986880242	10.3297814385166	4.0744681347436e-05	0.00285857754471004	2.83673875815787
Q66K64	DCAF15	0.618948088581575	3.39254299564448	10.1829605442692	4.43088729113639e-05	0.00296869448506138	2.78074685149454
P42330	AKR1C3	0.683731740307405	3.39948792658123	10.069127520045	4.73211379264992e-05	0.00310834925595632	2.72599298338114
Q8ND90	PNMA1	0.605587100279425	3.46704617145024	10.2465923697229	4.27217071843058e-05	0.00292427535271266	2.70751277153872
Q96T88-2	UHRF1	0.370748385765424	3.38692647255542	11.4964833388251	2.16936938087179e-05	0.00181684685648012	2.62261568831352
Q9UGL1-2	KDM5B	0.595898203772847	3.45714615993298	9.82423488745882	5.46392120299283e-05	0.00342133383738803	2.54884477662172
P48200	IREB2	0.362430390877902	3.41361824524144	10.9576813243373	2.8802666276455e-05	0.00220695378947253	2.5233977852484
O94880	PHF14	0.356801373790351	3.40596791282967	11.0019861898403	2.81256931629973e-05	0.00219118772316374	2.50422762217717
Q15438-1	CYTH1	0.500834142583726	3.41960441045063	9.99615529171557	4.93764231120915e-05	0.00318098110433666	2.50326982228511
Q8NEM2	SHCBP1	0.37152351310551	3.42719865626556	10.4641723860849	3.77696219174124e-05	0.00270411330956183	2.47677167819796
Q86XK2-5	FBXO11	0.586586724756586	3.46009569172025	9.87579353198534	5.29958020293286e-05	0.00338163689139525	2.43839385537977
P30304	CDC25A	2.91077663602347	3.19194381633499	12.6717528781495	1.21714261191205e-05	0.0011968926828763	2.35619131629931
Q9Y5N6	ORC6	0.310421616109257	3.38638740169321	10.2051291427763	4.37483199011494e-05	0.002960744882199	2.35164606389192
Q9H3F6-1	KCTD10	0.741447531976639	3.47309801670931	9.59924160497877	6.25345565768387e-05	0.00380892299149836	2.33695497285469
O75164-1	KDM4A	0.411321662888955	3.41456681411989	9.99775357312374	4.93303174618418e-05	0.00318098110433666	2.3135669563224
Q9H8N7	ZNF395	1.5451108292508	3.49686447211869	10.2444942620387	4.27729827710209e-05	0.00292427535271266	2.2886819928226
P10644	PRKAR1A	0.331269052670237	3.39516637571477	10.5435741024445	3.61299599908834e-05	0.00266011793339471	2.26461812732676
Q03933-2	HSF2	0.354938589296488	3.45421095408883	9.83880501027069	5.41689101464446e-05	0.00342133383738803	2.25168451244717
Q6UB99	ANKRD11	0.252145435115644	3.38270525679991	10.4664893625028	3.77205748845201e-05	0.00270411330956183	2.24461351647858
Q01664	TFAP4	0.599088350469163	3.47051428146406	10.0738017982733	4.71928858395163e-05	0.00310834925595632	2.23779131469581
P41229	KDM5C	0.4314401288603	3.38438537733067	10.4562302000486	3.7938306134151e-05	0.00270411330956183	2.20047638526954
P27986-4	PIK3R1	0.358899577348892	3.40906290532999	9.6437879349579	6.08720787969233e-05	0.00374167823797602	2.18559082654204
Q8TEM1-1	NUP210	-0.48815807063594	3.26837814148941	-9.66665498460335	6.00385033648766e-05	0.00372461085689512	2.13763039233412
Q06945	SOX4	0.633263196713998	3.48705042048341	9.02679395011722	8.93194880538894e-05	0.00534321937465231	2.07460151586318
Q5T6F0	DCAF12	0.665669134485929	3.44379355331762	8.64325348435459	0.00011470467598759	0.00662518387169702	1.84172971746585
Q86YS3	RAB11FIP4	0.682724863394684	3.43865832992824	8.43743327487364	0.000131709262507752	0.00735376715668282	1.7893356000915
Q6ZMT4	JHDM1D; KDM7A	0.837289143552958	3.43873134393516	8.3169795306121	0.000143001067647603	0.00772667059063663	1.70716745497234
P07196	NEFL	0.476158578923271	3.42260507134342	8.84685269015493	0.000100323164266591	0.00594836460695715	1.70393330784317
Q8IZJ1	UNC5B	0.67087580425794	3.52158882855555	8.17255500805516	0.000158037682109819	0.00847081976108631	1.5965460819717
Q9UKT4	FBXO5	0.576339343342124	3.41501244963397	8.78703227286323	0.000104321393561162	0.00613116962157708	1.52868301637198
Q92539	LPIN2	0.378242151531382	3.39704195659984	8.5046356465709	0.000125856728054125	0.00720718015352682	1.52458383499049
Q5VV67-1	PPRC1	1.00272084474183	3.46872838326795	8.08185077202273	0.000168409636782825	0.00888460288539314	1.41887424008191
Q9BQI3-1	EIF2AK1	0.456921356991141	3.42600959049878	8.02377866490471	0.000175460801012864	0.00911308036268366	1.37444369450426
P49703	ARL4D	0.911477727628038	3.46226187477104	7.85013668327183	0.000198656309805542	0.0102384405822856	1.3623420253137
Q7L590-1	MCM10	0.582335449876068	3.45089157375745	8.08324663345072	0.000168244202930289	0.00888460288539314	1.36058813535845
Q9UKB1-1	FBXW11	0.322940383621032	3.40287531105403	8.32651475718239	0.000142067677033592	0.00772667059063663	1.28039788833093
Q9Y2I1-1	NISCH	0.398675089618919	3.3835001652832	8.31783365921441	0.000142917171165076	0.00772667059063663	1.2480251589078
Q56NI9	ESCO2	0.527765538994146	3.44464318193593	8.70075596673287	0.000110415399535725	0.00643289719034221	1.2188044596218
Q9Y4E5-4	ZNF451	1.12453929674865	3.46864093144696	7.73201390216174	0.000216451685871724	0.0108778209647815	1.14569670521518
P38936	CDKN1A	1.864259050148	3.34520673659116	7.72602751556657	0.00021740117876857	0.0108778209647815	1.12330380443355
Q96QD9-1	FYTTD1	0.757297021911174	3.48879592665283	7.65626379537361	0.00022882635056374	0.011096849529421	1.02877540253781
O96020	CCNE2	0.856213008890877	3.44034503684001	7.32495663861105	0.000293427384805458	0.0133739012122216	0.972801451380177
O43303	CCP110	0.334839901081514	3.39473759763555	8.483311824167	0.000127680753805809	0.00724966991948239	0.919188866236569
Q9UKA4	AKAP11	0.290971477466202	3.39798219147448	8.42181025981776	0.000133114323975013	0.00737079314572384	0.891529312875885
Q9Y597	KCTD3	0.627006529203128	3.44340944783761	7.62611398465948	0.000233976208553845	0.0111180184206437	0.814760462524102
Q6Q0C0-1	TRAF7	0.466032314535156	3.40519963793531	7.64569680598252	0.000230616334322792	0.011096849529421	0.807210739034959
Q15345-2	LRRC41	0.267682828030625	3.36674045256704	7.73544253132989	0.000215910020258116	0.0108778209647815	0.766933222967386
O94782	USP1	0.279451843894206	3.41500791715856	8.06251651633653	0.000170720420125099	0.00893614699092313	0.734567044166584
Q14739	LBR	-0.415370071154544	3.27846022509685	-7.69992954843059	0.00022159680330807	0.0108778209647815	0.722750714270157
Q96T92	INSM2	0.903905366581385	3.44021317539885	6.98530558602017	0.000382347593551068	0.0162134739037478	0.715743279510355
P27540	ARNT	0.390290588153138	3.39632632351573	7.40692629489584	0.000275683796970078	0.012651242737668	0.686439974957976
Q14201-2	BTG3	0.671021249787885	3.45388532462325	6.97554749153457	0.000385325213842243	0.0162369744197675	0.660669609430883
P11309	PIM1	1.16721550062207	3.45601232617563	7.20467853517254	0.000321887349395363	0.0142824188142314	0.65301921857372
Q9BYN0	SRXN1	1.02541072099267	3.37725162607266	7.0274808462841	0.0003697774731076	0.0159839294827156	0.600693222222828
P17676	CEBPB	0.478985385370193	3.47170934528462	7.00303357551996	0.000377005168074586	0.0161918886288444	0.567070720681834
Q9NZM5	GLTSCR2; NOP53	0.369525153392722	3.42749240997206	7.50895922172037	0.000255290448604781	0.0119611608786855	0.559695323244743
O76080	ZFAND5	-0.422371499108285	3.27341255265969	-7.72055985934755	0.000218272577039081	0.0108778209647815	0.525329340782063
Q8WTP8-2	AEN	0.519631658606558	3.47699854109735	7.11750622319116	0.000344496777838941	0.0151850553389533	0.492697009230594
Q9GZR7	DDX24	0.597364218861574	3.42752846095398	7.6383257256423	0.000231874467778946	0.011096849529421	0.49002980893675
P13797	PLS3	0.183029185582089	3.3594099321258	8.46296574742532	0.000129449552085127	0.00728833612580128	0.418190818140815
P49454	CENPF	0.220447270449485	3.39175234955291	9.05563755663963	8.76880981539011e-05	0.00529288520388412	0.301966853935074
P61962	DCAF7	0.33346500874713	3.40297246673846	7.47920809268641	0.000261052425902298	0.0121461892607319	0.278272159340201
Q712K3	UBE2R2	0.346821946828757	3.39061702340587	7.21413262654668	0.000319539144287373	0.014272748444836	0.277437773635866
Q16352	INA	0.421866400868915	3.39255321639162	7.56755993860947	0.000244362582811091	0.0115297838368613	0.216728317193905
Q6PGQ7	BORA	0.490716806572928	3.4460927683153	6.39038578766273	0.000623831229497659	0.0229928723309079	0.204310472294807
Q9H081	MIS12	0.22954185181127	3.35512808777579	7.09011745020015	0.000351972286780847	0.0154131654995534	0.181259401101234
Q8NHY2-1	RFWD2	0.374053566842707	3.41916029055129	6.94368639713547	0.00039523391780124	0.0165504203079269	0.14691045098746
Q9NS37	CREBZF	0.425652097220495	3.41775498181451	6.69828123562184	0.000482136514611463	0.0192280633803381	0.14685130014858
Q9BSK4	FEM1A	0.510125408969874	3.44707791319914	6.31628622890885	0.000664692071200893	0.0235610347389288	0.113679457075926
O00311-1	CDC7	0.180721913277593	3.36745790961989	7.23880260793501	0.000313503518186312	0.0140971380660959	0.107726333181752
P19532	TFE3	0.456777540778164	3.42896443221342	6.31163625816766	0.000667356404913623	0.0235610347389288	0.102646365625015
Q9GZN2-1	TGIF2	0.522533613561425	3.46139641041767	6.62132140323836	0.000513754238339616	0.0200125197492758	0.101007103748352
P33981	TTK	0.223318051451039	3.37725160627084	7.6948322015131	0.000222427085399263	0.0108778209647815	0.0909961487987303
Q6PGN9-1	PSRC1	0.522690605533836	3.40630113158236	6.3642721404776	0.000637894795897984	0.0231982617101159	0.044339292570192
Q9UHK0	NUFIP1	0.281904608485377	3.38985016185518	7.08002904617855	0.000354772526420461	0.0154349086169941	0.0436581740596331
Q8TBE0	BAHD1	0.731681482486072	3.43662177103778	6.27304840385395	0.000689942876774025	0.0240761316374269	0.0178346593077885
Q9BQ90	KLHDC3	0.443600644361997	3.4082356991894	6.45937457752804	0.00058834908438702	0.0223555789180419	-0.0727442159876537
P09601	HMOX1	1.14343876543792	3.47835880200022	5.93505531736223	0.000929824935816469	0.0308255716307324	-0.0969076456862341
Q7L273	KCTD9	0.320284860134533	3.4035702210526	6.66237495302119	0.000496602578021764	0.0195312199371652	-0.0980262854346101
Q99592-2	ZBTB18; ZNF238	0.248496984478358	3.36240085689379	6.6632392309679	0.000496248595888331	0.0195312199371652	-0.102836451420602
Q14004-1	CDK13	0.270158562712535	3.38252607541461	6.85983359521538	0.000422736719305975	0.0172629019826239	-0.10297516738735
Q86TG7-2	PEG10	0.36041218257982	3.37103063301119	6.43734643354885	0.000599421848123028	0.0223555789180419	-0.147904268150434
Q16877	PFKFB4	0.592381972306144	3.43893733014372	5.87957326733209	0.000977682574512495	0.0314544730014148	-0.179358803308969
Q9H410	DSN1	0.304819950700735	3.3949728643502	6.89415135014823	0.000411224222285717	0.0169030815295356	-0.216965263478885
Q14145	KEAP1	0.253588751426401	3.37476958657028	7.25292840699281	0.000310106450144713	0.0140386028106053	-0.221679434446118
O95872	GPANK1	0.368306063481904	3.48189070046593	6.35418949467499	0.00064342142794632	0.0231982617101159	-0.261314450803964
Q92794	KAT6A	0.258571610061628	3.37715927202373	6.80938062022625	0.000440338336188924	0.0176662685776395	-0.264709325155433
Q8IXM2-3	C17orf49	0.551116717079789	3.3297814695835	6.48239904130897	0.000577024487745976	0.0222187590109083	-0.278650959617054
P36969	GPX4	-0.191471440286897	3.29478434461306	-6.85283030443224	0.000425131168228798	0.0172629019826239	-0.294636526930733
Q08050-2	FOXM1	0.316276760554487	3.37439242544318	6.24805129106932	0.000705039761639026	0.0243644543781512	-0.299042860412896
Q9NV79	PCMTD2	0.434988435206432	3.37997487486196	5.87562723375673	0.000981191769745625	0.0314544730014148	-0.321133049426478
Q5JSZ5-1	PRRC2B	0.23627821771064	3.36517448457367	7.46859465790817	0.000263143957950171	0.0121590656432148	-0.36405243181536
P24928	POLR2A	0.327204893548686	3.43150348087925	7.71032760431447	0.000219914122122865	0.0108778209647815	-0.372626365245935
Q8IWU5-1	SULF2	-0.2997671075693	3.30745042630167	-6.43901963334361	0.000598572486876487	0.0223555789180419	-0.380300790569613
Q9GZT9-1	EGLN1	0.283750422921591	3.40880747596322	6.38897387674844	0.000624582502123171	0.0229928723309079	-0.422619841529304
Q92624	APPBP2	0.629612918621436	3.35514287007202	6.06218708311536	0.000829892377302859	0.0280494517703035	-0.52511194127558
O43739	CYTH3	0.340803161734372	3.4091954371341	5.88867676381946	0.000969641224701386	0.0314345961913839	-0.55175239931065
Q9Y5V3-2	MAGED1	-0.224407111243883	3.29254611214208	-6.48383870637238	0.000576324700797021	0.0222187590109083	-0.580304476149607
Q96IT1-2	ZNF496	0.36855138609243	3.4141610081388	5.67521155361291	0.00117980449049812	0.0352887950282921	-0.627522674458727
Q15468-2	STIL	0.356871709847188	3.46600696852895	5.73371248449735	0.00111745914582271	0.0341871062877266	-0.636556885717085
Q86T24	ZBTB33	0.203474944055659	3.36437175957304	6.31353492388305	0.000666267040390602	0.0235610347389288	-0.653573998586033
Q2KHR2-1	RFX7	0.308157031630202	3.39830862400405	6.24733443259	0.00070547823124796	0.0243644543781512	-0.68226888840894
O60315-1	ZEB2	0.40976450821132	3.40353774440656	5.63927401824512	0.00122006126660098	0.0358526775711691	-0.682680617996839
O95997	PTTG1	0.249277766260658	3.38597500097354	5.9131892354255	0.000948360417933523	0.0310761288806219	-0.718716750770397
Q96L50	LRR1	0.293727945904845	3.42305794365151	5.81332892835904	0.00103853774120407	0.033134299362225	-0.724878447315915
Q71F23	MLF1IP; CENPU	0.310229853163692	3.35984339412554	6.30416072000933	0.000671665318676926	0.0235610347389288	-0.768347507235501
Q9NVK5-1	FGFR1OP2	0.46205768553732	3.34852713779179	5.65011066453343	0.00120776009461898	0.035647544642939	-0.800862212749597
Q5VWN6-1	FAM208B	0.194546579942357	3.37296014613854	6.65779460962522	0.000498483374515709	0.0195312199371652	-0.808484148916556
P62805	HIST1H4A; HIST1H4F; HIST1H4D; HIST1H4J; HIST2H4A; HIST2H4B; HIST1H4H; HIST1H4C; HIST4H4; HIST1H4E; HIST1H4I; HIST1H4B; HIST1H4K; HIST1H4L	-0.187732753096995	3.33317576379641	-6.43581962311904	0.000600198099493316	0.0223555789180419	-0.838840879241949
P49790	NUP153	0.243248640913065	3.37947820832591	6.9859601884109	0.000382148790692461	0.0162134739037478	-0.896743900742242
Q9BZX2-1	UCK2	0.19413851145223	3.36916726272471	6.06813833346766	0.000825523235488013	0.0280494517703035	-0.941000029736616
Q9UKL3	CASP8AP2	0.284544172841151	3.41114772958047	5.52967823439166	0.0013528034940412	0.0384058619071019	-0.947989869023852
Q9BY42	RTFDC1	0.20479453714724	3.36076069575066	6.35311892801488	0.000644011444489784	0.0231982617101159	-0.961654867605985
Q7Z7L7	ZER1	0.281465216439145	3.36884644327646	5.52451382505862	0.0013594519944958	0.03843176524524	-0.963376314199955
Q96EA4	SPDL1	0.20788361105207	3.38005336174456	6.05782632575312	0.000833110582431402	0.0280494517703035	-0.983995648585752
Q9NZU0	FLRT3	-0.342578023723277	3.33155776267235	-5.71629391343178	0.00113562197259426	0.0345848509835523	-0.984030670729892
Q86XR8-1	CEP57	0.233381079934649	3.40230545025545	5.80586518434477	0.00104566054349979	0.033203439058998	-0.996219899012693
O15297	PPM1D	0.224263266295048	3.39449732001319	5.91030478540868	0.000950836779183206	0.0310761288806219	-1.00961569804148
Q96M94	KLHL15	0.291652444895866	3.40315078105691	5.39401394392628	0.00154041717510207	0.0421256941762608	-1.02039310738126
A1L0T0	ILVBL	-0.320278459738549	3.2589864706557	-5.70316867499338	0.00114952988558926	0.0346930190695858	-1.03007846893137
Q9NYF0	DACT1	0.465008150464002	3.45630012874157	5.11087176277294	0.00203518668305745	0.052067713596502	-1.03958563273348
Q9H6E5	TUT1	0.446273596454972	3.39758730954719	5.66553494448733	0.00119049358887032	0.0354502535352496	-1.07326548618395
Q96D09	GPRASP2; ARMCX5-GPRASP2	0.140028394400227	3.35826968913811	6.07097405217522	0.000823450603366232	0.0280494517703035	-1.08113362308856
P10645	CHGA	-0.212380851502827	3.30782880119814	-5.93012401884325	0.000933968812095324	0.0308255716307324	-1.09237051177845
Q9UQR0	SCML2	0.135409829563898	3.33728358733735	6.36977254161384	0.000634902701255591	0.0231982617101159	-1.09703979805026
Q9NQZ6-1	ZC4H2	0.317455754894884	3.38250261495481	5.78721822925697	0.00106369987607182	0.0336169300456659	-1.09751562368579
P26599-3	PTBP1	-0.11806287792275	3.31777111734661	-6.9176724658171	0.00040354086696754	0.0166896531400155	-1.11267554267578
Q8TB40	ABHD4	0.425926203081112	3.36319813906168	5.1242153286395	0.00200817941138421	0.0519490426883174	-1.13378611700476
Q07954	LRP1	-0.0930115383703978	3.30023096302746	-6.46186327286316	0.0005871128592489	0.0223555789180419	-1.14021816558685
Q9H3N1	TMX1	-0.350815416034782	3.23677537546598	-5.45018718454182	0.00145936554349407	0.0405895214400604	-1.15622845331704
Q9HDC9	APMAP	-0.337640262189288	3.30020339773802	-5.56889722048633	0.00130350181917153	0.0374826703366921	-1.16726972382899
Q13371	PDCL	0.265301995458101	3.36485954453785	5.44972587877741	0.0014600111443365	0.0405895214400604	-1.17801463939318
Q8N448	LNX2	0.371456042142479	3.41461540128262	5.15069587439165	0.00195577489323133	0.0511862960337888	-1.18339048890909
O75618-2	DEDD	0.640283620665285	3.44698492483641	4.87673714022315	0.00258274070667217	0.0588583766486514	-1.1964754260838
A0AVK6	E2F8	0.38265503527997	3.45175519913954	5.05449457605851	0.0021539191296298	0.0540307306674048	-1.21229961469721
P61296	HAND2	0.314226532644899	3.44277959616802	5.50150932071689	0.00138952144169135	0.0389531115453224	-1.22465895242296
O60341	KDM1A	0.146717091805236	3.36485976676286	6.43503463989337	0.000600597642574259	0.0223555789180419	-1.23317657778362
Q0D2I5-5	IFFO1	0.32115658532653	3.37970995414632	5.17548828055631	0.00190810976615454	0.0509336073037269	-1.25377668037218
Q9NWF9-1	RNF216	0.330675678030707	3.40231061081307	5.15786655810297	0.00194185167178068	0.0511862960337888	-1.27005473064936
Q9H8K7	C10orf88	0.215571213497949	3.39639114970429	5.56155912504532	0.00131256916792571	0.0375821086542831	-1.28506558030576
Q86YI8	PHF13	0.425283240155226	3.49001374720171	4.87190544338054	0.00259567345808791	0.0589525836243696	-1.34242476585476
Q4KMQ2-2	ANO6	-0.219971277162601	3.32905511777541	-5.76680902746871	0.00108385105059388	0.0339336543877523	-1.34980100821211
P51991-1	HNRNPA3	-0.154332166993963	3.2921669637909	-6.81189838324082	0.000439440327930864	0.0176662685776395	-1.35157080559515
Q9H0C5	BTBD1	0.584764158228962	3.39814467947791	5.15405615548969	0.00194923626532815	0.0511862960337888	-1.38871283228649
Q9UKT7	FBXL3	0.327763137642599	3.43456544109759	4.95350100385554	0.00238672321218943	0.0563064983157366	-1.39206966856835
Q5TKA1-2	LIN9	0.36460900792998	3.40729490782688	4.95614584451289	0.00238027532032939	0.0563064983157366	-1.40285677834958
P48506	GCLC	0.166070183216727	3.34799303519142	5.77665752186208	0.00107407335571944	0.0337854060249776	-1.42844354110214
O95072-1	REC8	0.325574720449223	3.3442820857224	5.22525601987021	0.00181634300928767	0.0488734865952907	-1.44126159228505
O60333-2	KIF1B	0.187471096460045	3.37781592799819	5.60631795973921	0.00125835494811087	0.0366564267493167	-1.44448907458944
Q9BVI0	PHF20	0.195655394188546	3.39783533250756	5.41204377780708	0.00151385848450926	0.0418627190576657	-1.49376347665154
Q8NFH3	NUP43	-0.14259620695312	3.33708067207757	-5.62126289151137	0.00124082279746558	0.0363035490961546	-1.49540534641735
Q13137-4	CALCOCO2	0.176187923892214	3.39094174335253	5.74292208410234	0.00110798966662693	0.0341618232885803	-1.50939245369891
Q9UHH9	IP6K2	0.391063665176447	3.3930422839201	4.70339602417879	0.00309585245263945	0.0669103594602721	-1.53966840421637
Q13823	GNL2	0.323028770765705	3.39452669024051	5.73946462385963	0.00111153395177769	0.0341618232885803	-1.55727240723283
Q9UBZ4	APEX2	0.382780705959746	3.45813371637799	4.72401348853868	0.00302917573439166	0.0656811567004017	-1.55761772765489
Q9Y4B6	VPRBP; DCAF1	0.233952419918317	3.35203189921464	5.6566003296437	0.00120046087691801	0.0355888844042066	-1.56371193911606
Q9UMS6	SYNPO2	0.241353852602234	3.37826524782697	5.74519921545281	0.00110566237085479	0.0341618232885803	-1.58380077293825
O43915	FIGF; VEGFD	-0.523990724596988	3.2766246769472	-5.13374815065931	0.00198913327102897	0.0516557864957135	-1.58581067365179
Q8NFZ8	CADM4	-0.316388012210422	3.3414438235141	-4.9620893605804	0.00236585717969705	0.0563064983157366	-1.59412459540212
Q9HCL2	GPAM	0.341596214066422	3.42027591421285	5.04710329350617	0.00217005830616241	0.0540307306674048	-1.59516977959461
Q99708-2	RBBP8	0.362229581912955	3.40124453307666	5.00058168008641	0.00227483323959473	0.0558292406786986	-1.61494710259401
Q15326	ZMYND11	0.274969088007678	3.37457757180508	5.16197824778797	0.00193391866735057	0.0511862960337888	-1.61558826275266
Q9P0I2	EMC3	-0.310245078643417	3.2692662654656	-4.98728864622649	0.00230581290920705	0.056303001488007	-1.62162526325602
Q9UPW0-1	FOXJ3	0.317679792682578	3.40415191501282	4.97085544605499	0.00234477151003249	0.0563064983157366	-1.65452390930608
Q9UHA3	RSL24D1	0.164846278289422	3.36340129103318	5.20093576232528	0.00186054767415646	0.0498626776673931	-1.65594719413289
Q96GE4	CEP95	0.249498745354084	3.38371714571907	4.81519992080595	0.00275304114692062	0.0618320548488656	-1.67332495498557
Q9Y2M5	KLHL20	0.517112170732243	3.45501186586985	4.50874976802758	0.00381364747845892	0.0762729495691783	-1.68526789225094
O15534-1	PER1	0.449754363357334	3.46416033647432	4.90057972185689	0.00251997758290174	0.0584216256243657	-1.69548137732641
Q53H80	AKIRIN2	0.380666812367038	3.414252005667	4.80803181539454	0.002773688950905	0.0619457199035449	-1.71906745563751
Q8NEF9	SRFBP1	0.187754426022732	3.36203136157677	5.30068501830044	0.00168662724311582	0.0459365956458373	-1.72239127889795
O00231-2	PSMD11	-0.0822523623797133	3.31389663488941	-6.14812383572895	0.000769274432115449	0.0264314804880693	-1.73946843933342
Q9UJA3-4	MCM8	0.267016542745598	3.36321592108116	5.40685203590256	0.0015214525163797	0.0418627190576657	-1.75243228326281
O43151	TET3	0.443366543912969	3.41833819720457	4.62549308538392	0.00336313089517915	0.0704506706437207	-1.7570745000262
O94953	KDM4B	0.219535916422562	3.38661339738751	5.04871595396936	0.00216652536993257	0.0540307306674048	-1.75946926688397
Q01094	E2F1	0.529133518831059	3.41693895381585	4.69172080044464	0.00313434185184345	0.0675244064545052	-1.7620933917042
Q9UPP1	PHF8	0.199597667548125	3.37295885489347	5.11043346316527	0.00203608074063933	0.052067713596502	-1.77171814377748
Q9UMS4	PRPF19	-0.111897578456873	3.32479099296043	-5.98464068911652	0.000889300701767925	0.0296995264915707	-1.77296186712793
Q9HCH0	NCKAP5L	0.278705608762213	3.37388971155507	4.88864443994504	0.00255117822280517	0.0587725541814184	-1.79156638736773
Q96FA3	PELI1	0.331037473039028	3.39363220975108	4.53168941887225	0.00372002091022596	0.0748472675631049	-1.80344350128817
Q8TF40-1	FNIP1	0.36677895511713	3.39401964301901	4.45341762234391	0.00405056284188219	0.0781999283896297	-1.81904383702586
P17535	JUND	0.399174183827859	3.40774285635433	4.77842336761754	0.00286084584855996	0.0630515367939202	-1.82357969546297
P51587	BRCA2	0.261174493690002	3.39919575423907	5.40474096714166	0.00152455275374185	0.0418627190576657	-1.83194165673565
Q9Y2J2-2	EPB41L3	-0.231483849854528	3.31037303733118	-5.76010874974601	0.0010905610290858	0.0339849250924412	-1.85517148589077
Q8N8K9-2	KIAA1958	0.32912456669981	3.38451616579072	4.60268836700135	0.00344621342039077	0.0714849223424711	-1.87660771156695
Q16533	SNAPC1	0.360075186904005	3.3938997284292	4.49961053559307	0.00385168327987812	0.0764851352614268	-1.87666945329079
Q7Z3B3	KANSL1	0.177217048921213	3.37934158473497	5.23155647239739	0.001805086024702	0.048766436957675	-1.8783143042875
Q0VDD7	C19orf57	0.385342027124736	3.39840223625499	4.38808061574681	0.00435183357973882	0.0819024859108148	-1.89532859687791
Q9BW61	DDA1	0.275337851124685	3.36430668671129	5.14153487172668	0.00197372730844817	0.0514551477299717	-1.9275804351383
Q9UM11-2	FZR1	0.304300856622517	3.44200211095537	4.47409111037531	0.00396016449022759	0.0769075422739851	-1.93308117412615
P49848-3	TAF6	0.173602448817363	3.35670541425741	5.54265789381931	0.00133625624336337	0.0380975184278068	-1.93675440984801
P04406-1	GAPDH	-0.100012047232758	3.29925858811788	-6.91898135513691	0.000403118158539602	0.0166896531400155	-1.9403217030391
Q9NQW6	ANLN	0.155373945818363	3.36448143285763	5.57950571203363	0.00129051886561545	0.0372692948259634	-1.95541603070995
P49796-3	RGS3	0.260897952078992	3.41010881228924	4.55958277999678	0.00360963586759775	0.073434130331026	-1.99906453424025
Q969G9	NKD1	0.99428240271565	3.42553169625813	3.98999757361038	0.00683051917420032	0.105205697625614	-2.00023859983097
Q96QB1-2	DLC1	0.321848456697459	3.36927056666196	4.31532563652607	0.00471722697820461	0.0866038212515959	-2.00031718634107
O94964-2	SOGA1	0.131855813705155	3.35661847757445	5.70698207511444	0.0011454692297195	0.0346930190695858	-2.000376443485
Q9P2N6-3	KANSL3	0.180796770799787	3.37605949065436	4.97874293294367	0.00232598043348549	0.0563064983157366	-2.00385962947732
Q15046-2	KARS	-0.078126974530513	3.30792021295553	-5.88691871479909	0.000971188270390519	0.0314345961913839	-2.01867670042276
P11166	SLC2A1	0.188225433342259	3.38167793876827	4.88808220787972	0.00255265869653623	0.0587725541814184	-2.0222819833952
P35711	SOX5	0.230268974070908	3.36054320805674	4.72646753806856	0.0030213476004648	0.0656811567004017	-2.0348988986964
P51571	SSR4	-0.364675294762331	3.26089704878563	-4.79066036564126	0.00282445557421642	0.0626287460286249	-2.04854305125468
Q9BRK5-1	SDF4	-0.22157817260181	3.2837591189386	-5.08470844930344	0.00208934191357968	0.0532265810683798	-2.07271485080748
Q4KMQ1	TPRN	0.36245745660151	3.44528750123224	4.19701848197966	0.00538705696081085	0.0907665534532484	-2.07943723735993
P48634-1	PRRC2A	0.20148967629604	3.3512568577903	5.51703151193992	0.00136915040026385	0.0385433095872598	-2.0828399105697
P28749-1	RBL1	0.477732049224529	3.4056910105689	4.62238199610585	0.00337433147338134	0.0704506706437207	-2.09842496574004
Q96S82	UBL7	0.291324856006081	3.36906460493895	4.6526396817538	0.00326715211561452	0.0692718961222067	-2.10023561029
Q96SK2	TMEM209	-0.30880687670798	3.28805826986316	-4.22604843959239	0.00521336331352273	0.0897931470452501	-2.10549660886362
Q9UJU2-6	LEF1	0.300773244939663	3.41955197707558	4.58134655603259	0.00352606137286265	0.0726911113790146	-2.11091071758152
Q765P7	MTSS1L	0.33015183717011	3.38861137146708	4.27756709798061	0.0049203114401708	0.0879095643977183	-2.11488602565112
Q9BVW5	TIPIN	0.197809445286718	3.33914234641654	4.68308124897203	0.00316317044263475	0.0677100382289227	-2.12488261282258
Q9H165-1	BCL11A	0.355390182907761	3.40916365789078	4.23156673599025	0.00518105885081888	0.0896800848469167	-2.15450136214741
P41208	CETN2	0.132570539603648	3.35172872725901	5.05734669086424	0.00214772772736977	0.0540307306674048	-2.15587324013266
Q9H5Y7	SLITRK6	-0.299583387862775	3.3596626275705	-4.78800250655359	0.0028323149323393	0.0626287460286249	-2.15784499278111
P25440-2	BRD2	0.23148364520108	3.44683671078033	5.07420199153738	0.00211154622667577	0.0535884837830594	-2.16008805077846
Q9NPA0	EMC7	-0.364620458066753	3.3101322092313	-4.4911936331642	0.0038870899017315	0.0764851352614268	-2.16253362865804
Q96IY1	NSL1	0.305905463845491	3.3831433683133	4.97096388409797	0.00234451200871873	0.0563064983157366	-2.16791828178473
Q01581	HMGCS1	0.176407121110666	3.35551300581907	5.59227197923589	0.00127508945184337	0.0369831139712147	-2.2058474961952
P0DMV8	HSPA1B; HSPA1A	0.118114713913409	3.34590615997006	5.98252792804877	0.00089098579474712	0.0296995264915707	-2.21736946197338
Q9NYZ3	GTSE1	0.29154805157799	3.4274720301003	4.7285382383301	0.00301476002298564	0.0656811567004017	-2.22312941830395
O00264	PGRMC1	-0.282762131396376	3.25020071891129	-4.51690810890978	0.00378004992271654	0.0758273487491042	-2.23601654007233
P04843	RPN1	-0.360886445195607	3.27909626996276	-4.91566038510769	0.0024811683767516	0.057721625431374	-2.24303685803281
Q92626	PXDN	-0.307950696999468	3.29937044069111	-4.34877114631687	0.00454515302095793	0.0843560255967261	-2.24556585682795
O43896	KIF1C	0.174986122112213	3.36489337738147	4.64012479239049	0.0033110112930756	0.0697603008289513	-2.24677145613985
Q6IAA8	LAMTOR1	-0.204509183946146	3.24009444248435	-4.6782492584	0.00317942395371105	0.0678412117511594	-2.25129850410293
Q9UMZ2-1	SYNRG	0.106781689939257	3.35894296885131	5.16743368948608	0.00192344960207628	0.0511393346583772	-2.25680178374117
Q9H8H3	METTL7A	-0.421573906897565	3.30962583917927	-4.21962753926105	0.00525123537361806	0.0898524808039856	-2.27783421864111
Q96F44-1	TRIM11	0.459013942034625	3.39984914160917	4.49100883977318	0.00388787134320591	0.0764851352614268	-2.28787000281427
Q96AV8	E2F7	0.415094924330297	3.42197611161497	4.34954948616886	0.00454123310604168	0.0843560255967261	-2.28808128576164
Q14692	BMS1	0.250496102272072	3.38071641150229	4.96957860197526	0.00234782954559171	0.0563064983157366	-2.31321445381651
Q96L92	SNX27	-0.135821845279339	3.29705661225037	-5.00278581981378	0.00226974202826709	0.0558292406786986	-2.31332403492904
Q9P031	CCDC59	0.290136292192187	3.40668578700656	4.2158595714171	0.00527360288145141	0.089906206884795	-2.3192303948284
Q92871	PMM1	0.289157331172365	3.41200921373098	4.4379933314564	0.0041195165996888	0.0788593177654713	-2.33224069486064
Q9Y4P3	TBL2	-0.278721275887566	3.3277160873077	-4.35921548763622	0.00449286687892032	0.0840843801362182	-2.34062227720277
O94916-5	NFAT5	0.240094834495763	3.37702201033612	4.48151725217093	0.00392824682388222	0.0767325181341424	-2.34762140096373
Q9Y546	LRRC42	-0.211163246643881	3.29050560539097	-4.5922210669004	0.00348511877961564	0.0720688142698296	-2.34937205877479
Q9UMY1-1	NOL7	0.28799164339718	3.35259377502015	4.44843917746623	0.00407267629620636	0.0781999283896297	-2.3556712789477
Q7RTP6	MICAL3	0.13276007591314	3.36411800632689	4.87783801913853	0.00257980421884775	0.0588583766486514	-2.37929360562684
Q96H35	RBM18	0.248729097592161	3.42574289212877	4.29022899244174	0.00485113890061898	0.0876081688251946	-2.38981047044028
Q6W2J9-1	BCOR	0.0978475040623095	3.38865526381093	5.06795909617987	0.00212486624335178	0.0537230333224791	-2.39845568669151
Q92618	ZNF516	0.14431063675152	3.39166177794812	4.87745891487335	0.00258081501735268	0.0588583766486514	-2.40374047667251
P63244	GNB2L1; RACK1	-0.0957230183794568	3.33169390237399	-5.69455882236571	0.00115875831644629	0.0348147117497315	-2.40714933059411
Q9Y3Q0	NAALAD2	-0.251765512623195	3.26787722036021	-4.39278670221725	0.00432931361338868	0.0817081724217018	-2.41164257621423
Q10471	GALNT2	-0.224164371642209	3.30285705902301	-4.98510639381425	0.00231094409092566	0.056303001488007	-2.41951830722707
Q8IWI9-4	MGA	0.235001706482853	3.37385970752914	4.95893408515135	0.00237349911966213	0.0563064983157366	-2.42263841300138
Q9BWG6-1	SCNM1; TNFAIP8L2-SCNM1	0.301730915971398	3.38947018164974	4.56786680230746	0.00357756500486591	0.0733017906195767	-2.42988715625229
P23508-1	MCC	0.159248967999993	3.35507794901578	4.95887973526954	0.00237363099667392	0.0563064983157366	-2.4357011347144
Q96DY7	MTBP	0.161025940076695	3.3587476049572	4.49238723707801	0.00388204671708354	0.0764851352614268	-2.44396308318005
Q8N0Y2-1	ZNF444	0.298419956648533	3.46370568134233	4.01695056361819	0.00662019385666275	0.103633875793552	-2.44842458058962
Q96KQ7-2	EHMT2	0.111924598580528	3.36714637103777	5.11371573850891	0.00202939622602745	0.052067713596502	-2.44983601640323
Q92499	DDX1	0.128477141119741	3.36954479301383	6.30567050275182	0.000670792524453144	0.0235610347389288	-2.46016752085006
Q9BXS6	NUSAP1	0.510119727656765	3.40404440851118	4.39464822750859	0.00432044175658967	0.0817081724217018	-2.46958007692503
Q8NI77	KIF18A	0.180419705300126	3.42972816636482	4.44827692857425	0.0040733992549225	0.0781999283896297	-2.47353881274559
O94966-6	USP19	0.17063154102076	3.35841688790133	4.5625691296063	0.00359803739040031	0.073434130331026	-2.47670044378682
Q8IWZ3-6	ANKHD1-EIF4EBP3; ANKHD1	0.120439516950823	3.36228526587948	5.04012461412018	0.00218542209117414	0.0540307306674048	-2.47713787836819
Q9Y2U9-1	KLHDC2	0.300516617009629	3.42171267923743	3.93181236531663	0.00731038494016831	0.109370226590206	-2.48194427774027
Q15649	ZNHIT3	0.33817809539515	3.38185078127829	3.95305995095349	0.00713093681341266	0.108093386085667	-2.53937684715503
P21964-1	COMT	-0.154379106892572	3.29314348163733	-4.39319680944673	0.00432735732816056	0.0817081724217018	-2.54422727222861
Q9Y4C8	RBM19	0.299296582104997	3.38714383730621	4.72945971845836	0.00301183369342772	0.0656811567004017	-2.5459846602251
Q8TF39	ZNF483	0.433644287487868	3.47129184855654	3.81280958732744	0.00841294047003033	0.117160316108609	-2.54997031753574
Q9H6F5	CCDC86	0.174860840571966	3.36579651826482	4.92936140720637	0.00244649357579535	0.0573129613910099	-2.55341230298153
O75496	GMNN	0.287791658361836	3.39964150370766	4.48686012631816	0.00390546163425847	0.0765105057003851	-2.56135874281471
Q14249	ENDOG	-0.229013773062307	3.35449970658322	-4.53436959305108	0.0037092513924497	0.0748472675631049	-2.57307840515624
P25787	PSMA2	-0.095264812124633	3.3133332506625	-5.0435605698001	0.00217784241609151	0.0540307306674048	-2.57666052461389
P17098	ZNF8	0.220919670415487	3.39225339562223	4.26075309994706	0.00501387868483593	0.0882899206487062	-2.57918031726413
Q5JTV8-3	TOR1AIP1	-0.417542071437874	3.32583962835492	-4.2294517036281	0.00519341386874682	0.0896800848469167	-2.5799819568543
Q7Z2Z1	TICRR	0.34741732126306	3.36576108114257	3.97043336315752	0.0069878445917176	0.106648197641248	-2.59345935490502
P68431	HIST1H3F; HIST1H3C; HIST1H3D; HIST1H3G; HIST1H3H; HIST1H3B; HIST1H3A; HIST1H3E; HIST1H3I; HIST1H3J	-0.243063441723925	3.32398643137926	-4.65567441085831	0.00325661542829684	0.06926769323679	-2.60138957921479
O00287	RFXAP	0.264920735275304	3.39895398729704	4.30948481752981	0.00474801930524467	0.0866038212515959	-2.64034213537156
O95613	PCNT	0.157107261870274	3.3539274509803	4.91598105158441	0.00248035051583086	0.057721625431374	-2.6454587484359
Q8N766-1	EMC1	-0.368267061032902	3.29832189955249	-4.45564357314264	0.00404071912488508	0.0781999283896297	-2.66886433677252
Q9Y639-2	NPTN	-0.276893723118218	3.33356806567365	-4.06374067768532	0.00627197972521125	0.0995431837961185	-2.66972351543755
Q3T8J9-3	GON4L	0.215063923253889	3.33827419490757	4.24891922292484	0.0050809253984723	0.0890770909541919	-2.67487568341242
P21741	MDK	0.364544229823555	3.27310661960603	4.26354137543403	0.00499822566391532	0.0882899206487062	-2.676577976067
Q96AP0	ACD	0.262041565294248	3.36953281420868	3.97338579822465	0.00696384644209871	0.106524591694204	-2.68478619731979
Q8N9F7	GDPD1	-0.245308256132612	3.36152356570265	-3.8911699349364	0.00766778449616048	0.112170646559553	-2.69163388302691
Q96SW2-1	CRBN	0.164307892082547	3.33628419296118	4.31189593303178	0.00473528091360311	0.0866038212515959	-2.69622089842022
Q9NT99	LRRC4B	-0.31779280632322	3.31857891707056	-4.04029977766366	0.00644380843308002	0.101824331371783	-2.69705153537542
Q8IXQ5	KLHL7	0.306367027842518	3.43722690890993	4.33380619479891	0.00462126197129023	0.0855316442200125	-2.7027725885285
Q99442	SEC62	-0.276510649373746	3.29965196828389	-4.22251145682618	0.005234187408557	0.0898524808039856	-2.71135047778116
Q9Y6Q9-1	NCOA3	0.262787395420631	3.38944190640759	4.28123213944706	0.0049001763296105	0.0879095643977183	-2.7147206558933
Q70UQ0-4	IKBIP	-0.314943668350009	3.29580978622281	-4.27865679609279	0.00491431517324929	0.0879095643977183	-2.72246901443029
Q969V3	NCLN	-0.300110153958205	3.28352520560992	-3.86632659660645	0.00789578515533327	0.113011813719897	-2.73403646098022
P38398-7	BRCA1	0.198517880040748	3.38505445084962	4.68713603547073	0.00314960337116398	0.0676357134192266	-2.75939684724138
Q8IXI2-3	RHOT1	-0.277754775295155	3.31123883290084	-3.92022265672487	0.00741037840296819	0.109601623178558	-2.76923906822273
Q9P035	PTPLAD1; HACD3	-0.273020375882903	3.30764174598563	-4.23596931862034	0.00515544627905291	0.0894857255690531	-2.7728800253556
A6NHT5	HMX3	0.290533346078182	3.42387587126204	3.94595278554153	0.00719041001658875	0.10853111210933	-2.77599461248067
O95155-4	UBE4B	0.202635177141743	3.33743583921347	4.82029703356433	0.00273846426093928	0.0618320548488656	-2.8067087265688
Q8NCD3-1	HJURP	0.226395128485963	3.41898363654752	3.92140402295146	0.00740011658665746	0.109601623178558	-2.80900584095701
O75132	ZBED4	0.200315581104233	3.40163566949569	4.09448829348671	0.00605428250621434	0.0982171738296273	-2.81295450950601
Q9UL63-1	MKLN1	-0.147227467215929	3.33609546089749	-4.30142198382482	0.00479089620502396	0.086989172286343	-2.83311880303444
Q5W0Q7	USPL1	0.49194895489122	3.4228381580416	3.4904825050857	0.0124432494892237	0.150342560310653	-2.83986573842506
Q9HBZ2	ARNT2	0.322147370711823	3.38001016417639	3.84192127129191	0.00812711481921576	0.114613495333987	-2.84610331904453
Q5JRA6-1	MIA3	-0.21108050925995	3.31198151845231	-4.17603599592569	0.00551662613046094	0.0922951271712979	-2.84622461856117
Q9UPQ0-1	LIMCH1	0.207316596855242	3.35848618268944	4.61557092966282	0.00339899948884015	0.0707245235255558	-2.8482904645294
Q15047	SETDB1	0.131786129314189	3.34996765211381	4.54345118359296	0.00367301911566863	0.0743481210724466	-2.87722852268812
Q99550	MPHOSPH9	0.191908362663282	3.3859903989671	3.97705217555029	0.00693417270627909	0.106313403048215	-2.89089282734237
P28799	GRN	-0.299388740742264	3.33090418044123	-3.75288014054816	0.00903708485923444	0.122816366241117	-2.90152763789217
Q05707-1	COL14A1	-0.235543756147339	3.32660734930532	-4.33126478266419	0.00463432834889712	0.0855371899107733	-2.90770062885044
O43683	BUB1	0.123778577881256	3.37420020711384	4.43231975283519	0.00414521054470264	0.079125101565549	-2.9121130931006
Q96BJ3-1	AIDA	-0.187114725139184	3.32417101487493	-4.3078369831699	0.00475674719710258	0.0866038212515959	-2.91478451293943
P11474-1	ESRRA	0.322350599493353	3.37994118262412	3.61895640342325	0.0106255208587187	0.135447647187904	-2.92029476599855
Q8TB52	FBXO30	0.107707968481584	3.35721782990512	4.64258667277391	0.00330233142121661	0.0697603008289513	-2.92201931598992
Q9NVR0	KLHL11	0.230849690924597	3.41204275061544	4.01001473187673	0.00667361952611055	0.104008625897112	-2.93447284087606
Q9HCK8-1	CHD8	0.124772535407945	3.34722314911059	4.79337626670896	0.00281644996250208	0.0626287460286249	-2.94091148125481
Q8TCJ2	STT3B	-0.296776600251956	3.29181934471366	-3.81245674446644	0.00841647243928818	0.117160316108609	-2.94345940227383
Q15005	SPCS2	-0.383585362116596	3.31279640218353	-4.09022532202617	0.00608395568678535	0.0984361046791791	-2.94629678391495
P04198	MYCN	0.159543365879693	3.39721973553611	4.14900041845299	0.00568873347832905	0.0946878371336998	-2.948582661396
Q9C0C9	UBE2O	0.0684914313275959	3.34152672337414	4.93745207047106	0.00242627459294327	0.0570387360446313	-2.95188434671847
O75362	ZNF217	0.258596166102506	3.40407768898128	4.47521850617389	0.00395530024361557	0.0769075422739851	-2.97043365070077
Q8TF72	SHROOM3	-0.196626298546259	3.31567269644954	-4.2423443979463	0.00511860895781551	0.0890770909541919	-2.97519465936132
Q96S52	PIGS	-0.454056422476632	3.20471859462165	-3.70093533332209	0.00961970760421793	0.127627803857941	-2.9840132685604
Q15113	PCOLCE	-0.194856441250263	3.31401022700808	-4.07192644200526	0.00621318333054734	0.0995188040887481	-2.99509051909607
P35716	SOX11	0.16258312276586	3.38090252881318	4.19740897111895	0.00538467808495587	0.0907665534532484	-3.0004797469323
O15379-2	HDAC3	-0.132785465127201	3.33598771023527	-4.11908771022888	0.00588617492812747	0.0964238924656578	-3.00895340330032
Q8TDM6-1	DLG5	0.307355343777823	3.38908389235644	3.99050481972796	0.00682649291239769	0.105205697625614	-3.01144197539071
Q7Z628	NET1	0.281339914437981	3.40479229205619	3.90728909398566	0.00752376451282278	0.111033529153992	-3.01325317542808
Q13188-2	STK3	0.171662785695548	3.33691873215932	4.06761040397232	0.00624410747865463	0.0995188040887481	-3.0138016479101
Q9Y575-3	GPR75-ASB3; ASB3	0.318508668231765	3.36746327560956	3.36618364569147	0.0145321127880244	0.162005250715081	-3.01856276135308
Q14683	SMC1A	0.0868651108766555	3.32238734209348	5.2442381293567	0.0017826664811931	0.0483557304615132	-3.03384582856135
Q14254	FLOT2	-0.262803080624325	3.31116458689126	-4.12079859262071	0.00587467818712684	0.0964238924656578	-3.03449442426879
Q8IX90	SKA3	0.180040487564135	3.38890061752623	4.41872537717177	0.00420750978430714	0.0800861237353915	-3.04659609433072
Q8IW50	FAM219A	0.234050963174891	3.37753677912008	3.69432968018476	0.00969672912301236	0.12833594535998	-3.04709245569552
Q9ULU4-13	ZMYND8	0.14111827321007	3.3660849005688	4.81769679495729	0.0027458896059834	0.0618320548488656	-3.04794887430254
Q9NWQ4	GPATCH2L	0.29718606152071	3.38494438400024	3.36195706242828	0.0146095980223464	0.162425001479842	-3.05906505977553
Q5FBB7-1	SGOL1; SGO1	0.230880733277569	3.41049666873009	3.86935418116713	0.00786760077976081	0.113011813719897	-3.06127708543656
Q6PIW4	FIGNL1	0.210870044304797	3.34678105460295	4.21262055106096	0.00529291555650552	0.0900064320522512	-3.0626291254331
O95619	YEATS4	0.185374962243496	3.3752226942837	4.18906184030507	0.00543578573466563	0.0912776050683201	-3.06270024611181
Q14118	DAG1	-0.170217917397898	3.3390249016694	-3.8812408592894	0.00775802027405316	0.112325052544914	-3.06420505744654
Q8WUW1-2	BRK1	0.948228792948483	3.23620485995134	4.02376238607338	0.00656818650358705	0.10330246378881	-3.07920965121222
Q96AG4	LRRC59	-0.310592686356442	3.29071795835364	-4.26647598062268	0.00498181017213151	0.0882899206487062	-3.08235108796794
Q9H9Y2	RPF1	0.299235227612499	3.35734869488279	3.76122543011607	0.00894717580425309	0.122243233861338	-3.08908738294133
Q96GV9	C5orf30	0.266581370457776	3.37935985555017	3.37226144708316	0.0144214773349129	0.161303899511473	-3.09702326735658
Q7L2Z9	CENPQ	0.200058985279611	3.39841129855646	4.11248163316046	0.00593080240609921	0.0966821803427365	-3.09825077440536
O75695	RP2	-0.270461985844246	3.28766204815649	-4.02070162358351	0.00659149852348018	0.10342632343634	-3.09866840713558
O14672	ADAM10	-0.221746076952112	3.33423725022547	-4.07946976229985	0.00615954492798838	0.0992042091767359	-3.09891275565603
O00458	IFRD1	0.16259778142735	3.37752021181163	3.89369912687886	0.00764498577406879	0.112081848328798	-3.10380765391615
Q15527	SURF2	0.267221521701196	3.38814002035894	3.86471570065647	0.00791082696039277	0.113011813719897	-3.10496362774106
O95292	VAPB	-0.277084061671007	3.28511501150431	-4.25954716301726	0.00502066563688911	0.0882899206487062	-3.10762237140503
P17677-2	GAP43	-0.153927757335872	3.35337933313005	-4.26124038272978	0.00501113919303783	0.0882899206487062	-3.11052915396829
Q92769	HDAC2	0.112619055743541	3.37088787133019	4.81299608853597	0.00275937080594191	0.0618320548488656	-3.11319775637977
Q9H4G4	GLIPR2	-0.296879839031496	3.32590263825739	-3.5754439880484	0.0112061293165376	0.141662389473211	-3.11491193477862
Q07065	CKAP4	-0.32185922625205	3.2801711285923	-4.55771664951615	0.00361690492675203	0.073434130331026	-3.12201030879434
Q86SF2	GALNT7	-0.194453754724399	3.32702647805635	-4.00456754926533	0.0067159149184135	0.104164505489768	-3.12321071683892
Q6VMQ6-4	ATF7IP	0.117929149987717	3.3352871374584	4.2442754453703	0.00510750886297909	0.0890770909541919	-3.13100164431414
Q6FIF0	ZFAND6	-0.221018106136825	3.32378125574134	-3.96340090007669	0.00704537761283342	0.107281886377236	-3.14316349719128
Q6RFH5-1	WDR74	0.255390432096904	3.41051305017583	3.95612365976329	0.00710546838075594	0.107951560433253	-3.16174826211912
P62753	RPS6	0.133397103775744	3.27522904322986	4.62210709917076	0.00337532317561707	0.0704506706437207	-3.1660635618682
P05556-1	ITGB1	-0.292033702969029	3.30232134143408	-4.07053318279142	0.00622314725115812	0.0995188040887481	-3.16760583752812
O14908-1	GIPC1	-0.0975921707725182	3.32768820324719	-4.29879558743663	0.00480495640589067	0.0870086700526149	-3.176931099232
Q9C0F1-1	CEP44	0.159546196917456	3.34700843109332	4.00252831709231	0.00673182550404025	0.104164505489768	-3.17891418849183
P22692	IGFBP4	-0.250862261524281	3.28525920318794	-3.408628885573	0.0137784561839271	0.157481982571807	-3.18329945912944
Q969X5	ERGIC1	-0.248160516655825	3.26055577908866	-3.62661970872418	0.0105267431702081	0.134855027228288	-3.18694550656668
Q8N428	GALNT16; GALNTL1	-0.217827768423297	3.29775961259857	-3.68982019362973	0.00974970092361636	0.12833594535998	-3.19896818805153
P31321	PRKAR1B	0.282525382807614	3.4272155281177	3.50161573659476	0.012272898253835	0.149234878948629	-3.21785861209858
Q68D91-1	MBLAC2	-0.169937013186162	3.32041099932667	-3.70310183775865	0.0095945937767985	0.127547179175694	-3.22285619756557
Q00765	REEP5	-0.216528341524232	3.27131636020081	-3.76855237696912	0.00886905398898433	0.121518735636391	-3.2342653742564
Q8NFU7	TET1	0.279676106560784	3.35409167780718	3.50625090596496	0.0122027323378213	0.148873394406964	-3.23694510267692
O00451-1	GFRA2	-0.292570851038967	3.30876793973168	-4.26969836009782	0.00496385436075641	0.0882899206487062	-3.24100213816987
P31350-2	RRM2	0.24456847516509	3.37896711064565	4.36455782852147	0.00446638290860161	0.0838228725143719	-3.24506063863237
Q9UBQ6	EXTL2	-0.257830128065577	3.34576459318117	-3.58747186067692	0.0110422132595865	0.140307529537655	-3.24518295685109
Q92503-2	SEC14L1	-0.206154849991944	3.31845072235412	-3.52685599809504	0.0118961141146915	0.146736984265538	-3.26045103289185
P28289	TMOD1	0.184580314888985	3.35701789794695	4.06632565196781	0.00625334574945716	0.0995188040887481	-3.26241439533767
Q96HY6-1	DDRGK1	-0.379651778668959	3.1827666719747	-3.19510764101832	0.0180606944654883	0.182748585742702	-3.26340448511016
Q96JG8-4	MAGED4B; MAGED4	-0.182065105000132	3.33309239210418	-3.80413657069159	0.00850023585572649	0.1174259386255	-3.28308517281979
Q92966	SNAPC3	0.273095214556958	3.37735286130889	3.4167644300873	0.01363895359572	0.157282253169232	-3.28608524529351
Q9NQ86	TRIM36	0.173655741604384	3.37346350114311	3.92609212726299	0.00735954923306377	0.109601623178558	-3.29273396462672
Q96C34-1	RUNDC1	0.186366867710877	3.41700590402918	3.61832915184703	0.0106336511075877	0.135447647187904	-3.29828925359452
Q96GX5-1	MASTL	0.182924325069665	3.34248576026005	4.0258471144285	0.00655236092179554	0.10329604276713	-3.29973509729281
Q13191-1	CBLB	0.176860016847366	3.37138827994415	3.56716102736899	0.0113205682362747	0.142571066133535	-3.30702822353079
Q8WUY8	NAT14	-0.224795631980558	3.30731575535864	-3.41374811568767	0.0136904936987623	0.157335004771368	-3.31092853071906
Q8IXV7	KLHDC8B	-0.349370130550622	3.3255298963855	-3.1224540555546	0.0198332192585857	0.18821821268286	-3.31256934366163
P81274	GPSM2	0.204487122060333	3.38844640669879	3.49979572058251	0.0123005703670401	0.149300401194147	-3.31730539509258
Q86X95	CIR1	0.168819441755071	3.3783654950221	3.80444172881057	0.00849714740147011	0.1174259386255	-3.33175194022141
Q8WXF7	ATL1	-0.217775351314448	3.28679194332376	-3.73324093092243	0.00925264234475301	0.125237785272414	-3.33882977191198
P32418-4	SLC8A1	-0.22605529046389	3.34257054612772	-3.42881283780311	0.0134351940774191	0.155476509135944	-3.34738331012161
O15504	NUPL2	-0.150231068897494	3.29140722526473	-4.0883355388863	0.0060971617077402	0.0984361046791791	-3.35014464940252
Q9NUA8-1	ZBTB40	0.375378844239736	3.38055506483264	3.21009476829661	0.0177169440343374	0.18206062121175	-3.36086507021107
P28676	GCA	-0.251119725267961	3.31406847504784	-3.75526971159832	0.00901123873351297	0.12271402340353	-3.36317061585115
P21397	MAOA	-0.304209496392744	3.28425804087773	-4.2436493375922	0.00511110492024615	0.0890770909541919	-3.37211193369839
Q9UHN6-1	TMEM2	-0.146187266939914	3.31882260469797	-3.67232954678046	0.00995820589001388	0.129805407515745	-3.37530303848645
P12107-2	COL11A1	-0.282858303965079	3.29571663423094	-3.11757256760151	0.0199589135523324	0.18821821268286	-3.3872651436516
O95478	NSA2	0.230086041324051	3.38023934485537	3.62869935111054	0.0105001123117835	0.134771556492241	-3.39188934256157
Q00973	B4GALNT1	-0.205223420895369	3.29851491774784	-3.35430526818692	0.0147510305369991	0.162820271166218	-3.39355166721638
Q9HBM6	TAF9B	0.131246766879381	3.34772223118857	3.86079307051247	0.00794758785375392	0.113295401319471	-3.39647719365179
P42167	TMPO	-0.32926955756526	3.2691530805643	-3.88187079617229	0.00775226049005928	0.112325052544914	-3.39835859443922
O75955	FLOT1	-0.185364169409162	3.31584535890105	-4.13389857164771	0.00578747498707557	0.095507592151247	-3.40326695851942
Q9GZM5	YIPF3	-0.238015196296962	3.27299298281185	-3.32899268067817	0.0152296817068069	0.165916857618872	-3.4147451064337
P41134	ID1	-0.213702846900706	3.30827478053749	-3.27337026241261	0.0163422545222601	0.174074889187826	-3.42090232574746
P48449-1	LSS	-0.154201608178728	3.28898767123966	-4.06199590091994	0.00628459205160569	0.0995431837961185	-3.43252004657361
O94986-4	CEP152	0.21027954568499	3.35697641114833	3.80450452558676	0.00849651200011707	0.1174259386255	-3.43282114482181
Q99661-1	KIF2C	0.100298307698895	3.34615868053509	4.14113453953542	0.00573992687260808	0.0949568149295658	-3.4458109351331
Q14978-2	NOLC1	-0.101597625465612	3.3051762277491	-4.72450857552732	0.0030275946270771	0.0656811567004017	-3.45622088136389
P32297	CHRNA3	-0.393576831541705	3.32964965834051	-3.35745710072276	0.0146925926410353	0.162820271166218	-3.46240227236037
Q9NQR1-1	SETD8; KMT5A	0.277271847426831	3.38495708466785	3.26766572398911	0.0164612851445746	0.174787021344928	-3.4632984443682
Q9H147	DNTTIP1	0.216225514911123	3.36695810887493	3.39403203852676	0.0140326914022186	0.159084657182512	-3.46429962189966
Q8N2G8-1	GHDC	-0.432668834687659	3.29560181729059	-3.19410594922901	0.0180839272160315	0.182748585742702	-3.46801750353858
P35237	SERPINB6	-0.108661146673643	3.30892958141103	-4.12716557860535	0.00583211304221717	0.0960077576974326	-3.47595962580517
P55769	NHP2L1; SNU13	-0.150601492901464	3.29352331121918	-4.20338782491106	0.00534840081939905	0.0907197101011991	-3.48795925092176
Q13449	LSAMP	-0.213229289975649	3.31244585347376	-3.57040804657488	0.0112755540760389	0.142271586270171	-3.48842346692027
Q9Y394	DHRS7	-0.336904561011167	3.28831990327234	-3.07678828533933	0.021043497638647	0.192611248878326	-3.49371226461487
Q99627-1	COPS8	-0.184739985258914	3.33858418878013	-3.65224478152435	0.010203732813705	0.131724489117194	-3.49456233006204
Q8NG31-1	CASC5; KNL1	0.194891675296849	3.34776595741437	4.19623980147252	0.00539180422005864	0.0907665534532484	-3.49728920888031
P02545	LMNA	-0.165109526334241	3.30156505802737	-4.35021311169131	0.00453789391149377	0.0843560255967261	-3.51073808795168
Q6N022	TENM4	-0.3412009846461	3.31090678801902	-3.14872226820291	0.0191714302723469	0.18821821268286	-3.51262948709106
O75844	ZMPSTE24	-0.354800504256196	3.30453642305893	-3.43743357847481	0.0132914528862658	0.154605441558995	-3.51349873610921
Q9HCK1	ZDBF2	0.171273624422907	3.36214806351065	3.44451734340669	0.0131746020694893	0.153720614808267	-3.51420495292804
Q12846	STX4	-0.247873819591905	3.33377750652422	-3.31511864635575	0.0154992237657826	0.168099520304473	-3.51580936806222
Q8IWP9	CCDC28A	0.352560512796331	3.38876994664381	2.78945877684414	0.0307497198065158	0.227417990946656	-3.52231614947814
Q9Y3A3	MOB4	-0.132691605677382	3.34383985188761	-3.84880332948797	0.00806112993655059	0.114427056302731	-3.52414175574108
Q9H0Z9	RBM38	-0.168674471500603	3.27941761483157	-3.69182692978151	0.00972608890511375	0.12833594535998	-3.52640557191769
Q9Y6W3	CAPN7	0.173862562819652	3.34874240250583	3.87169351764872	0.00784589990795406	0.113011813719897	-3.53398782828191
P57088	TMEM33	-0.25939013467642	3.31191753793326	-3.45616700424691	0.0129848791239426	0.152897522197567	-3.55166924166313
P09172	DBH	-0.317789926696967	3.30090892391451	-3.88603728958764	0.00771428378543347	0.112325052544914	-3.55489271093548
Q96IF1	AJUBA	0.476252070660261	3.45419057249518	2.64269098403239	0.0374759248447318	0.247979651739055	-3.55734678973347
Q86VN1	VPS36	-0.107055061552893	3.30231325098372	-3.94043677190019	0.00723694850939167	0.108960797781852	-3.56566926193413
Q4V9L6	TMEM119	-0.358239229518901	3.29237263789408	-3.01243124542056	0.0228870384507035	0.201237739658417	-3.57153958414807
O43309	ZSCAN12	0.354979540330018	3.41256842405982	2.75329811418925	0.0322777770160608	0.232065173320168	-3.57936775610435
Q92890-1	UFD1L; UFD1	0.275713566083842	3.3881582296503	3.92155724941165	0.00739878675797789	0.109601623178558	-3.59453290518376
P39656	DDOST	-0.312144855307104	3.30611907293347	-3.41519834226648	0.0136656868988968	0.157319763269087	-3.59514543695064
P36955	SERPINF1	-0.236773050054406	3.34079138309142	-3.40617693506154	0.0138208068286899	0.157481982571807	-3.60367482426485
Q9BWT1-2	CDCA7	0.165987040172411	3.43483396076787	3.42192986697761	0.0135511848353002	0.156539548959502	-3.60412987008583
P36896-4	ACVR1B	-0.278888040051667	3.37181899895924	-3.12913321839574	0.0196626269694673	0.18821821268286	-3.6107611675147
Q9Y330	ZBTB12	-0.206377252749343	3.35048212897431	-3.19689028880582	0.0180194289444778	0.182748585742702	-3.61129549606253
P54289	CACNA2D1	-0.248583187687902	3.30298351615645	-3.88607002626945	0.00771398621654992	0.112325052544914	-3.61313231553706
Q8WVX9	FAR1	-0.191595916149689	3.25363668665318	-3.33955071173551	0.0150279980188385	0.164264578295039	-3.61510669428155
Q96EK7	FAM120B	0.147797310503065	3.33855301597855	3.69051415449131	0.0097415283579131	0.12833594535998	-3.61636751455374
Q9UKV8	AGO2; EIF2C2	0.115965554409555	3.3473108578225	3.89808055415432	0.0076056685208399	0.11174995414392	-3.61855266406892
Q8TAT5	NEIL3	0.252298903074528	3.41820979065272	3.16324019189569	0.0188160004004709	0.186766226197267	-3.62102012134501
Q8WVZ9	KBTBD7	0.188056904388861	3.36539418424959	3.84030584758162	0.00814269011626538	0.114613495333987	-3.62212056545638
O75431	MTX2	-0.203689493204217	3.30265105012101	-3.81125162625518	0.00842854811408206	0.117160316108609	-3.62266862216188
Q9Y673	ALG5	-0.213930188068294	3.30068375102213	-3.51287125086577	0.0121032793182563	0.148248576658716	-3.62487876520147
Q96C12	ARMC5	0.236771524138581	3.35500826003661	3.08491063874606	0.020822503773626	0.192611248878326	-3.62791522095227
Q9UKM7	MAN1B1	-0.160880936475649	3.31601475859239	-3.39424795091708	0.0140288935639703	0.159084657182512	-3.63203399593456
P35613	BSG	-0.238018751659289	3.2985817109926	-3.87895846517334	0.00777892901206567	0.112325052544914	-3.64668579584297
Q8TEU8	WFIKKN2	-0.233722148366259	3.36195068630376	-2.9852454632027	0.0237176356261098	0.20492553329685	-3.64727246625036
P06756	ITGAV	-0.225740247541181	3.33137357944238	-3.779795184119	0.00875064493401532	0.120636463082104	-3.64994548593417
P19022	CDH2	-0.192239630526568	3.3109444747759	-3.93301213500958	0.00730011953500717	0.109370226590206	-3.65030054519878
O43251-8	RBFOX2	-0.107013172952415	3.32583440102521	-3.87911142682192	0.00777752579467154	0.112325052544914	-3.65243550922332
Q96EI5-2	TCEAL4	0.20890634147758	3.34709474149235	3.71479409830184	0.00946030389768969	0.126125519118179	-3.65349517125918
Q13129	RLF	0.138239646558573	3.35366526077489	3.50504461399683	0.0122209502871389	0.148873394406964	-3.65564815307321
P00390	GSR	0.139022840066307	3.35104348557699	4.2835274171811	0.00488761341448881	0.0879095643977183	-3.65868579172017
Q13740-1	ALCAM	-0.221386847661924	3.3386949978668	-3.68746512816169	0.00977749235846475	0.128449409415125	-3.66798993664343
Q969N2	PIGT	-0.498372959798775	3.26325284214373	-3.44554213644573	0.0131577910889769	0.153720614808267	-3.67232698758392
O15119-2	TBX3	0.105219601880306	3.37166660399908	3.8158896960407	0.00838217815455467	0.117160316108609	-3.67477307924381
Q6P4I2	WDR73	-0.154991260901263	3.34229183940301	-3.58535673187181	0.0110708457284736	0.140307529537655	-3.68178416282434
Q8WVC6-1	DCAKD	-0.215050671907317	3.29447076486356	-3.22316913047909	0.017422882238047	0.18042242812197	-3.68340304132644
O75882-1	ATRN	-0.266183733055503	3.2938932270454	-3.16172408550109	0.0188527807192727	0.186854483460247	-3.68742256924571
Q155Q3-1	DIXDC1	0.25131197477845	3.39934046609279	3.19051002650449	0.018167597740512	0.182767124416562	-3.69708589895454
P61026	RAB10	-0.189604037614339	3.33419628735098	-3.51328325599003	0.012097119576749	0.148248576658716	-3.69717309925044
P62253	UBE2G1	0.181927851272866	3.39459061074095	3.8434567291495	0.00811234115079651	0.114613495333987	-3.69779259868394
Q9Y5A7	NUB1	0.103681337628665	3.34380692686749	3.64439697469518	0.0103014787375588	0.132475830214288	-3.70127297776304
O15258	RER1	-0.233898836475785	3.32813143005338	-3.46248592800728	0.012883227623066	0.152595579006988	-3.70287395272069
Q96AP4-1	ZUFSP	0.206032026001835	3.41354850595351	3.12103463328831	0.0198696793558739	0.18821821268286	-3.70356473277674
P00533-1	EGFR	-0.210451948143884	3.33406458779762	-3.76017649270565	0.00895842206356968	0.122243233861338	-3.70705226875808
Q9UKS6	PACSIN3	-0.128712191305849	3.29741630045464	-3.6812847906016	0.00985084195536168	0.129159767320789	-3.70991344565038
Q14679	TTLL4	0.180926887165221	3.36116066673034	3.48980177886168	0.0124537493988675	0.150342560310653	-3.7118989668481
Q99805	TM9SF2	-0.143763428200666	3.31161167868533	-3.76915625138044	0.00886264909221806	0.121518735636391	-3.71681052188663
Q6PJG2	ELMSAN1	0.141146465418927	3.38694073602553	3.66914437509849	0.0099967039049429	0.130054206141976	-3.7177608771107
Q2T9J0	TYSND1	-0.25388627127711	3.28215504134274	-3.01610785889088	0.0227771430713481	0.20060269634274	-3.72015567123293
Q15834	CCDC85B	0.197757713170372	3.36198243319073	3.21120872136524	0.0176916800154117	0.18206062121175	-3.73349338943132
Q96FZ7	CHMP6	-0.242023023874886	3.35220153234916	-3.25817856756118	0.0166613448160636	0.176074148687108	-3.73628750606695
O15530-1	PDPK1	-0.0998318490946177	3.30217991848462	-3.64682407050708	0.0102711388214322	0.132339673276145	-3.73797426974934
P33991	MCM4	0.0915849576429237	3.3334083134543	4.48985587275603	0.00389275091405172	0.0764851352614268	-3.74339923375179
P46781	RPS9	0.0892808058922077	3.30724166806	3.92364576782342	0.00738068728259746	0.109601623178558	-3.7496280507108
Q9H8W3	FAM204A	0.168784195717523	3.35902140567924	3.21370772162111	0.0176351463428933	0.181777662303669	-3.75502740084229
Q9HAT8	PELI2	0.138339707383233	3.38291988305101	3.52668568248996	0.0118986135179662	0.146736984265538	-3.75826001999537
P28161	GSTM2	-0.170237863262599	3.30931125922853	-3.72936470056173	0.00929585620349325	0.125256601965843	-3.76765495663836
Q9NNW5	WDR6	-0.130634069605679	3.32338572016647	-3.72194636308164	0.00937918291986819	0.125430190744744	-3.77567167597959
P23528	CFL1	-0.110601768611521	3.29842016151036	-4.49257581128776	0.00388125063016058	0.0764851352614268	-3.78052845779538
P83916	CBX1	0.0904395052571782	3.35426480865043	4.09644238550113	0.00604073466317297	0.0982171738296273	-3.78173139830943
Q12929	EPS8	0.142605210984968	3.34929911786328	3.31482641468933	0.0155049569949997	0.168099520304473	-3.78678500120654
P29323	EPHB2	-0.226327046061048	3.32586008437321	-3.53929237145527	0.0117151608956226	0.146166811919314	-3.7905543061553
Q12906-7	ILF3	-0.0890938456730997	3.31298178328214	-4.5693726954611	0.003571769528465	0.0733017906195767	-3.79167411020659
P18075	BMP7	-0.498037647879191	3.26893729118216	-3.07838727235866	0.0209997920378805	0.192611248878326	-3.79353274178431
Q14318-2	FKBP8	-0.156181798564194	3.28881506363909	-3.62229244127849	0.0105823951986513	0.135309251585808	-3.80653263248777
Q6UX07	DHRS13	-0.441686459412912	3.26541735289426	-2.61479991018415	0.0389225529335678	0.252694868851651	-3.80672637425839
Q9H8V3-3	ECT2	0.158917121869977	3.38099067671692	3.84340392052047	0.00811284876303508	0.114613495333987	-3.80744919104675
Q8NCB2-1	CAMKV	-0.184108637608518	3.32133797252943	-3.45694428806028	0.0129723277006956	0.152897522197567	-3.8114010860577
Q53HL2	CDCA8	0.189890702675206	3.37251274155424	3.52602050265566	0.0119083806545056	0.146736984265538	-3.81571592045128
Q96QD8	SLC38A2	-0.302888252000059	3.36526305688272	-3.15567724837932	0.0190002549545287	0.187484106325983	-3.81664315295111
P62750	RPL23A	0.169829687058636	3.32990235256382	4.17486927635517	0.00552393223816275	0.0922951271712979	-3.81762600490322
O75973	C1QL1	-0.264604816422986	3.3366860672113	-2.88027346372264	0.0272433781599792	0.219029152890833	-3.82086328680435
Q9NRV9	HEBP1	-0.128756483477016	3.31568377861227	-3.41204686575644	0.0137196573437882	0.157400178430447	-3.82185180498757
Q14188	TFDP2	0.462650863563416	3.44057079250148	3.14173344982702	0.0193451282449099	0.18821821268286	-3.8266964184966
P43307	SSR1	-0.369689151071948	3.31931702122275	-3.01584860912935	0.0227848734204216	0.20060269634274	-3.82804656300613
Q9NXE8	CWC25	0.128774686479704	3.40285892988547	3.54393277665526	0.011648419505797	0.146150581814307	-3.83069038963233
Q9NS87	KIF15	0.110757191382626	3.34728269434424	4.06781069253531	0.00624266863386325	0.0995188040887481	-3.83171747493602
Q9NTX7	RNF146	-0.258906617296217	3.32030035690821	-3.13603646911383	0.0194879846501288	0.18821821268286	-3.83302205649775
P12109	COL6A1	-0.285742097428642	3.2739293061939	-3.24884805890386	0.016860691832141	0.177341656633194	-3.83903954247177
Q5VT06	CEP350	0.144417428178178	3.37192768558841	3.72697000886782	0.00932266480107127	0.125256601965843	-3.84044341101049
Q13308-6	PTK7	-0.225303491986074	3.33444296844415	-3.67749517676714	0.00989611853960982	0.129471430375093	-3.84788238050387
O14734	ACOT8	-0.228854284883782	3.2929905591169	-3.20831926707573	0.0177572929894154	0.182195808620342	-3.85151742330038
Q76I76	SSH2	0.192945718927788	3.40156866437387	3.14444709422589	0.0192774818652522	0.18821821268286	-3.8523309768731
Q5JTC6-1	AMER1; FAM123B	0.318440363806746	3.4224635496019	2.6659111270932	0.0363150845836384	0.244046058763958	-3.85743354267694
Q96PC5	CTAGE5; MIA2	-0.29588370135019	3.32245257161311	-2.93044854369372	0.0254924094235602	0.211647017519025	-3.86289558891523
Q15545	TAF7	0.113369235229805	3.41356898094206	3.65514558961954	0.0101678622920967	0.131514821152602	-3.8707113750892
O75396	SEC22B	-0.250943061077658	3.29237584739704	-3.34442771041632	0.0149358239807381	0.163780721229043	-3.87376665288352
O00743	PPP6C	-0.139161203789984	3.30980356797941	-3.65726144802093	0.0101417860516785	0.13143126991537	-3.87525530827746
P09668	CTSH	-0.166260590793713	3.32492696365169	-3.26020513928998	0.0166183877994174	0.175897627576772	-3.87651753338689
Q5SZQ8	CELF3	-0.13129443124577	3.30553944937293	-3.42876746937399	0.0134359550432405	0.155476509135944	-3.88662757719246
Q8TC12	RDH11	-0.256619514640148	3.31653349023231	-3.23838217271855	0.0170873975468491	0.178604623344601	-3.88904021851291
P33993-1	MCM7	0.177471455315314	3.32257573991204	4.30950711262437	0.00474790134038045	0.0866038212515959	-3.89097566999725
Q8NEM0	MCPH1	0.345617558518117	3.42082943477912	2.82205079911777	0.0294386674042613	0.226223665175336	-3.89351361785761
Q3B820-3	FAM161A	0.287505638830387	3.41781368095178	2.80537812729947	0.030101702973634	0.226608325756571	-3.89704751697854
P14635	CCNB1	0.167798498861035	3.39915801319074	3.37095805371491	0.0144451253293856	0.161303899511473	-3.8994472370473
Q9UBU7	DBF4	0.148455439614251	3.39526258605146	3.30986715841673	0.0156026059499757	0.168881195258219	-3.90660161831689
Q96CS2-1	HAUS1	0.126952721553645	3.33906235718009	3.55837726969174	0.0114433347371328	0.143846796883283	-3.91431351215756
Q9Y2W6	TDRKH	-0.249245799577228	3.29124228973305	-3.28150348419912	0.0161741691795707	0.172834024725875	-3.91499360837813
Q8NCL4	GALNT6	-0.22715743552523	3.26624091236651	-2.94347291061927	0.0250579730614287	0.209337181435876	-3.91905329624051
Q8TD26	CHD6	0.296751570523288	3.3682913122702	3.28868855060518	0.0160272489277667	0.17185273148612	-3.92807481266577
Q13547	HDAC1	0.135564048682233	3.37544172164269	3.51607369088822	0.0120554914452477	0.148205124189284	-3.94200567063257
P51530	DNA2	0.203484132915843	3.34256415239067	3.49264212937448	0.0124100025746734	0.150342560310653	-3.94931741939162
Q9NVX7-2	KBTBD4	0.214877777518455	3.36837608915428	3.24040421699564	0.0170433394377105	0.178422459738532	-3.95013030140728
Q9P2B2	PTGFRN	-0.328262266403645	3.33068544748105	-3.35118345502183	0.0148091627737478	0.162925107691478	-3.95132294524249
P29992	GNA11	-0.265360851628088	3.32898380351187	-3.46512367285302	0.0128410535147183	0.152544430050731	-3.95665379722659
Q14165	MLEC	-0.327200674345272	3.3154320925095	-3.02206662386413	0.0226002431093719	0.200094489826675	-3.96507814433328
Q9NYP9	MIS18A	0.138175443376662	3.34004610860486	3.31480898400597	0.0155052990370395	0.168099520304473	-3.9674589499486
P04920-1	SLC4A2	0.389201681566909	3.40115606665704	2.30400323287838	0.0596701841696115	0.312523186369633	-3.96759063131056
Q96Q89-3	KIF20B	0.151047717916373	3.36728070273826	3.82986919499271	0.00824411777953006	0.115555625780024	-3.98013201543248
Q9Y5M8	SRPRB	-0.270311416057881	3.33488312452512	-3.26887430913593	0.0164359880654224	0.174787021344928	-3.98280326376996
Q15528-1	MED22	0.269739340481105	3.326250460084	2.84394105386202	0.0285918037705596	0.223269330143065	-3.98918600482545
O75123	ZNF623	0.291002783119954	3.44101649658849	2.4907101674904	0.0461125827574884	0.278020194925054	-4.00146194565535
Q96CN5	LRRC45	0.188841946888313	3.36523615542966	2.92258657482552	0.0257585724549285	0.213096628103063	-4.0039537079611
P04844-1	RPN2	-0.323166714625003	3.31143550157675	-3.29537967571114	0.0158917390222814	0.170906342615225	-4.01005278088591
Q7Z478	DHX29	0.0869643126445524	3.32859619792972	3.85243555057313	0.00802654413488644	0.114178016356134	-4.01038301634992
Q8NB15-1	ZNF511	0.167067145274261	3.3861661313384	2.96081967583699	0.0244917084391842	0.207189957755725	-4.01560451597399
P78310-1	CXADR	-0.236341557077091	3.33431660808258	-3.38411491406083	0.0142083513280596	0.160532805898819	-4.01593911183007
Q8IVH2-1	FOXP4	0.135720917921587	3.35168561453357	3.18490993787637	0.0182987419355417	0.183260943151165	-4.01854049856503
Q03181	PPARD	0.206687610726036	3.36998292147896	2.76010248713037	0.03198415858666	0.231344513614768	-4.0188969600314
Q6IEE7	TMEM132E	-0.283238192052278	3.32991716746858	-2.54554929855215	0.0427760341304225	0.265829812009902	-4.02328435687172
Q9BT22	ALG1	-0.254876150928692	3.30010124159725	-2.80641694581982	0.0300599277147611	0.226608325756571	-4.0239086885724
Q92896-2	GLG1	-0.125132827287611	3.30050965812198	-4.00307002118994	0.00672759490857879	0.104164505489768	-4.02714351158291
Q9H0H3	KLHL25	0.32032619188477	3.36716129199912	2.87969715389813	0.0272642258971575	0.219029152890833	-4.02824462376413
Q8NBZ7-2	UXS1	-0.167196953820018	3.31224047062835	-3.04748032684547	0.0218622902910598	0.197408820687467	-4.03213847089583
Q96EE3-1	SEH1L	-0.10238450310978	3.31047211915505	-3.76992320113945	0.00885452194556569	0.121518735636391	-4.0322440200277
Q9ULW0	TPX2	0.200703482724137	3.39672744063318	4.11263038885739	0.0059297933400847	0.0966821803427365	-4.03633064333402
O15213	WDR46	0.325277107853796	3.39896314057297	3.19507681550659	0.0180614089325107	0.182748585742702	-4.04731394489147
P56199	ITGA1	-0.262107687191794	3.33522949039808	-3.38862924581916	0.0141280928873539	0.159895645853498	-4.0504774063422
Q13683	ITGA7	-0.318763273886969	3.26207792962563	-2.62506593697227	0.0383833163295363	0.250760051835261	-4.05157167617926
Q6UW68	TMEM205	-0.267598834653417	3.31467313736777	-2.90873416563584	0.0262348470243158	0.215129972754558	-4.05280265424157
Q9Y576	ASB1	0.284185465416616	3.39978694017052	2.61218973980491	0.0390609314887384	0.253102747557589	-4.05370703808512
Q9BVC6	TMEM109	-0.262743637203903	3.32050217567636	-2.75991340640337	0.0319922790452286	0.231344513614768	-4.05654734172994
Q12907	LMAN2	-0.200351132997651	3.27257979282388	-3.48481945623013	0.0125308967626545	0.150460588368791	-4.06055136931175
Q5T7P8	SYT6	-0.159072954377716	3.30939672461531	-3.22636079812757	0.0173519074276346	0.180244619790933	-4.06572080721443
Q8IXI1	RHOT2	-0.277588428869968	3.26837275703246	-3.25348066913787	0.016761392409958	0.176574416897357	-4.06991526966717
Q5IJ48	CRB2	-0.165473898918956	3.28831708351849	-3.11710564045659	0.019970981785448	0.18821821268286	-4.07147468985412
Q9ULK5	VANGL2	-0.209768757059494	3.31114674807311	-2.70373972279859	0.0345050182857242	0.237354848577364	-4.07208613781404
Q92585	MAML1	0.219540969988913	3.41978470203483	3.08072462494738	0.0209360814098952	0.192611248878326	-4.07213013238034
Q5VUA4	ZNF318	0.098588911202856	3.35144797695046	3.73702651513069	0.00921065348701879	0.124921818548635	-4.07536694350475
P05155-3	SERPING1	-0.324033046672192	3.2915626687815	-3.06022267236522	0.0215021364678167	0.195209098014054	-4.0762931055389
Q6UWP7-1	LCLAT1	-0.235477468354707	3.34106908610944	-2.75985783277777	0.0319946661869708	0.231344513614768	-4.07655638196655
P51955	NEK2	0.42270106664624	3.45192310800177	2.17471260778675	0.0714356044019726	0.340653771881293	-4.08824047596206
Q9BZQ6	EDEM3	-0.464712210381816	3.28512142494973	-2.40452637441197	0.0519196846305419	0.295676338618052	-4.08851110743792
P01892	HLA-A; LOC100507703	-0.155962282850281	3.31957554326927	-3.0293475613283	0.0223861056838768	0.199185800905677	-4.09270731873496
Q9UHL9-3	GTF2IRD1	0.275353181097655	3.41929402747669	3.07828429725934	0.0210026037214718	0.192611248878326	-4.09434823440003
P35610	SOAT1	-0.316713439437458	3.27727579098566	-2.84120857700858	0.0286960727693543	0.223822686326745	-4.09835488714967
Q8N461	FBXL16	0.204991294454351	3.34322678553224	2.9626623464746	0.0244323723311048	0.207183540865799	-4.11107098542961
P61224-1	RAP1B	-0.271726210076423	3.27947633837691	-3.44343146635378	0.0131924408230976	0.153720614808267	-4.11429147047358
Q9H5J0	ZBTB3	0.298361081262226	3.40041728122179	2.41707709324363	0.0510284666136492	0.293947011514717	-4.12087478079088
Q15004-1	KIAA0101; PCLAF	0.165833323076002	3.34843702356617	3.33096657447893	0.0151917516744885	0.165773186024549	-4.12157078543651
Q9UHQ1	NARF	0.135066697965442	3.35357576763368	3.53499296245557	0.0117773737202066	0.14666989577209	-4.12383430331525
Q8TAP4-3	LMO3	-0.217054400408232	3.32391559797735	-2.97783078691255	0.02394978353351	0.205290027141393	-4.12448538864993
Q13438-1	OS9	-0.358640136228651	3.25373643454255	-3.03339705863813	0.0222679577878823	0.198662206629576	-4.12882079290311
Q14135-4	VGLL4	0.379906993638724	3.35858334380689	2.75099973556287	0.0323776045685985	0.232143076007146	-4.13926341819558
Q8N196	SIX5	0.333448911027834	3.42669263364915	2.47047948112539	0.047411638656262	0.282001970274266	-4.13974406702363
P83731	RPL24	0.16892325757642	3.28354715588496	3.66432057841666	0.0100553208024688	0.130563273985545	-4.14833298292701
Q9BX67	JAM3	-0.284721088445745	3.35497179407027	-3.06340707306075	0.0214131385660177	0.195045497898154	-4.14835944512081
Q8TAM2-1	TTC8	-0.20759504591665	3.26775722061047	-2.85991454082141	0.0279903464811576	0.221150143188392	-4.152377510381
P23921	RRM1	0.0981382220124155	3.36548475495736	4.14152012978944	0.00573740539017346	0.0949568149295658	-4.15298601947541
Q15051-1	IQCB1	0.155082227877798	3.35541047987744	3.10654526994517	0.0202460522576707	0.189110167948183	-4.15545196839756
Q8IYA6	CKAP2L	0.264213225128665	3.35611583419204	2.92091222609036	0.0258156423057116	0.213273493770983	-4.15694976036394
Q9UMR3	TBX20	-0.137523169324024	3.35451390855522	-3.2875105975972	0.0160512354721553	0.17185273148612	-4.16657337936446
Q7Z4H7	HAUS6	0.0919088297333035	3.33369227432337	3.35576425410009	0.0147239480130264	0.162820271166218	-4.17188370693644
Q8IY95	TMEM192	-0.199285710114686	3.39106779716214	-2.89000508488327	0.0268939165215875	0.217804706012914	-4.17254360861951
Q9H1Z4	WDR13	-0.132389609239803	3.29943039041662	-3.11700421196623	0.0199736043608229	0.18821821268286	-4.17392949161849
Q9H816	DCLRE1B	0.265133423690331	3.38378952276545	2.39147690979826	0.0528635752136689	0.2976710765918	-4.17413103365736
P11117	ACP2	-0.12497876299394	3.30585706115544	-3.13129235598402	0.0196078218762969	0.18821821268286	-4.17654752687611
Q14142	TRIM14	0.273658681650036	3.33773501153105	2.50661642873266	0.0451174920565738	0.274059108593875	-4.18610148351467
Q6UX15	LAYN	-0.203195426191844	3.42539663782983	-2.81086426931036	0.0298817826388317	0.226223665175336	-4.1885187655742
Q9ULC3	RAB23	-0.218912453384846	3.35840366936159	-3.19191805858057	0.0181347853176201	0.182767124416562	-4.18889397853525
Q8TBC5-3	ZSCAN18	0.348925929367043	3.36615888224475	2.90786278664191	0.0262651220467505	0.215129972754558	-4.19110625532822
O75410-1	TACC1	0.175766741382709	3.35114337588986	3.10364605777339	0.0203222867048794	0.189110167948183	-4.19197888726092
Q9HD20	ATP13A1	-0.278771188233213	3.27386347329945	-2.64859447249781	0.0371771057381654	0.247417100461583	-4.19328243604363
Q9NR33	POLE4	0.254530617665573	3.29184762950115	3.11802376434828	0.0199472594096344	0.18821821268286	-4.19435526231189
Q9BRR6-1	ADPGK	-0.461704990599075	3.26320934426194	-3.15847159984509	0.0189319491668754	0.187085633359978	-4.19522980825212
Q9HCD5	NCOA5	-0.101847104640391	3.30379394433677	-3.71404663734332	0.00946882628603644	0.126125519118179	-4.1956992209419
O60462-1	NRP2	-0.166220316978782	3.32931625029612	-3.16626133860463	0.0187429407018069	0.186593911890202	-4.1982173607221
P84095	RHOG	-0.142935900655184	3.34239190056513	-3.0428114804194	0.0219958826668803	0.198081201435615	-4.2042546434243
O15484	CAPN5	-0.242824248368554	3.30266161809799	-2.75487616726843	0.0322094263255529	0.232046404710973	-4.20451290434713
Q8IW35-2	CEP97	0.0789346376208746	3.35840151660689	3.46030535687245	0.0129182070091103	0.15264900698596	-4.20766670185568
Q9UH99-2	SUN2	-0.205229729492119	3.32233588903917	-2.749448560438	0.0324451644267819	0.232143076007146	-4.20881991903449
Q9NQS7	INCENP	0.232950851644144	3.38985113983591	3.37729884693252	0.0143304796304195	0.161303899511473	-4.21145707273146
Q92994	BRF1	0.136521135766584	3.35296804445066	2.94626426107343	0.0249659078739267	0.209337181435876	-4.21220685444429
Q93073-1	SECISBP2L	0.254483041646967	3.39622832607808	2.55670970906849	0.0421287214528351	0.264139740503215	-4.21236150348525
O43294-1	TGFB1I1	0.159320372471643	3.36814899489314	2.97821598797497	0.0239376629647011	0.205290027141393	-4.21357471759422
Q12860	CNTN1	-0.240603331823683	3.30248153862978	-3.46731573303544	0.0128061207017026	0.152399660215643	-4.21462136643074
O75477	ERLIN1	-0.261894522625184	3.30775980644049	-3.04290615507695	0.0219931649257868	0.198081201435615	-4.2156949097762
P05388	RPLP0	-0.0943808326933107	3.33168225420399	-4.00981301747433	0.00667518046802361	0.104008625897112	-4.21671942339427
Q8N720-3	ZNF655	0.165987383076763	3.41147486275548	2.74351925474738	0.0327047995533483	0.232779433899347	-4.21756663685629
Q13332	PTPRS	-0.178936103506197	3.29843220874469	-2.95209786436354	0.0247746772780251	0.208792877689016	-4.21938739759913
Q9NQC3	RTN4	-0.154921852889549	3.34758437107685	-3.52562670776609	0.0119141670806646	0.146736984265538	-4.21973667999928
Q9Y4G6	TLN2	-0.0639438864878381	3.32174779060143	-3.8343183737275	0.00820070848840146	0.115188148579224	-4.2275080164597
Q9UBC1-1	NFKBIL1	0.257051450767976	3.39618054752729	2.45046412286583	0.0487347116208226	0.287431837904499	-4.22877164341969
P52789	HK2	0.184843544062748	3.3602453840404	3.7263713858501	0.009329379747194	0.125256601965843	-4.23125320931242
O15060	ZBTB39	0.155135533184722	3.73249467464401	2.81518716011611	0.0297097051760721	0.226223665175336	-4.23285446084014
O43439-5	CBFA2T2	0.182404709308	3.35161853214778	3.15103504196658	0.0191143231807347	0.18821821268286	-4.24438357674695
P0C0S5	H2AFZ	-0.213844553642017	3.26329723018558	-3.3762075630895	0.0143501395339152	0.161303899511473	-4.24788362159064
Q9Y244	POMP	0.622483444352638	3.32976510173923	2.71918069119962	0.0337940021897245	0.235435527957904	-4.25007860408996
Q9H078-2	CLPB	-0.218479846477865	3.32714955635317	-3.53321365508317	0.0118032267735008	0.146673097510466	-4.25280101256639
Q08722	CD47	-0.245461275040271	3.3043798572123	-2.86990864839216	0.0276209509279135	0.220048003825232	-4.25612710363494
Q05BV3-5	EML5	0.126865991464204	3.34156796921682	3.45250375053978	0.0130442124275998	0.153326707482314	-4.25624034061935
Q4VCS5	AMOT	-0.188854772281864	3.33455317174163	-3.06159844885077	0.0214636370856264	0.195123973505695	-4.26097019065455
P51511	MMP15	-0.178475321065409	3.3322223655258	-2.6349523702699	0.0378714987236886	0.249007891510023	-4.26168930389311
O60568	PLOD3	-0.318514165905211	3.30927960028681	-3.37097580515681	0.0144448029726085	0.161303899511473	-4.26317686605596
P46976-1	GYG1	-0.346066914931365	3.13800626228694	-3.39527288291563	0.0140108806605312	0.159084657182512	-4.26425694744766
Q9Y679-1	AUP1	-0.274600932810055	3.26745227125452	-2.79218234654716	0.0306378034477006	0.227417990946656	-4.26469727708812
P50281	MMP14	-0.182058583024533	3.30125015012489	-2.61737151674985	0.0387867266192603	0.252057292288113	-4.273254754151
Q9NRW1	RAB6B	-0.163778150214442	3.26345744434167	-2.8874406063582	0.0269855366688537	0.218030189279858	-4.27353581757117
Q9P2D0	IBTK	0.152323177408777	3.36708751989088	2.80557254028576	0.0300938800848743	0.226608325756571	-4.27541083105766
Q15398	DLGAP5	0.175367460536329	3.36952726849117	3.46972899292701	0.0127677835264355	0.152254897685367	-4.27972260092199
P20248	CCNA2	0.119427616383631	3.37296825466253	3.1323205706741	0.0195817811859811	0.18821821268286	-4.27996145488804
Q9UL26	RAB22A	-0.159822997029794	3.31973434229828	-2.9194402843096	0.0258659256064817	0.213425740841659	-4.28191938656009
P51648-2	ALDH3A2	-0.232471051825214	3.27678620179402	-3.07695849282428	0.0210388406198044	0.192611248878326	-4.28552030744601
Q86UE4	MTDH	-0.234442604997159	3.25372210893381	-3.29703759570273	0.015858356371898	0.170821523620123	-4.29136319223068
Q8NCC3	PLA2G15	-0.186278310527669	3.29672394112273	-2.83282861357458	0.0290183961734227	0.22554901898136	-4.2943577027981
O43524	FOXO3	0.144025190907611	3.37567358178767	2.95755219292113	0.0245973076461477	0.207820884273883	-4.29503088122874
Q8N5K1	CISD2	-0.263802759845318	3.30379163515948	-3.0917112464216	0.0206394071047942	0.191264215217319	-4.29636292647586
O00463-2	TRAF5	0.157485109903083	3.34809216019974	2.72582600618837	0.033492823162965	0.234484759866108	-4.29869948690393
P50148	GNAQ	-0.26441160489073	3.30790147178556	-2.96180293686184	0.0244600269887832	0.207183540865799	-4.29878753060328
Q969I6	SLC38A4	-0.243853198702194	3.36708002662775	-2.59637606753961	0.0399105117522793	0.256185693937209	-4.29885402903888
P50402	EMD	-0.234203455005162	3.3115928169099	-2.89480863573607	0.0267232005550815	0.217680802993965	-4.30243981728229
Q9BYW2	SETD2	0.0680824950008644	3.34139447433752	3.46200645472947	0.0128909101071575	0.152595579006988	-4.30328959379095
Q92833	JARID2	0.328830419118419	3.39055220385614	2.62682075967815	0.0382919370814579	0.250760051835261	-4.30345780930059
Q9H0A9-1	SPATC1L	-0.450353632882306	3.07663201408199	-2.08195491342896	0.0813223860166828	0.363186905367154	-4.30795213191221
Q96HD1-2	CRELD1	-0.286420214822717	3.29103768703841	-2.58427974328372	0.0405735712770778	0.258898026244211	-4.31095061583771
Q5VWG9	TAF3	0.0979597957837769	3.3354055412087	3.10459597951359	0.0202972743695351	0.189110167948183	-4.31102112527047
Q96PM9	ZNF385A	-0.109042734318283	3.32418706299903	-3.05203823119983	0.0217327193251413	0.196769215511414	-4.31333784353317
Q96JJ7-1	TMX3	-0.293796670944942	3.32249703867609	-2.33558332049094	0.0571134118430263	0.30760438854363	-4.31371991621858
Q9Y3E5	PTRH2	-0.245681046227461	3.30623839343757	-2.88585781581502	0.0270422518345615	0.218030189279858	-4.31486240163054
P33527-9	ABCC1	-0.157251949594511	3.33727042110296	-3.120268020507	0.0198894012751877	0.18821821268286	-4.32561022843698
Q16611	BAK1	-0.169798022976176	3.32269413956514	-2.75690408730746	0.0321218172561261	0.231664344043105	-4.32662709678848
P60174	TPI1	-0.105840096088615	3.31475786124202	-4.21864787458416	0.00525704066793468	0.0898524808039856	-4.32871511905222
P48552	NRIP1	0.223667205224664	3.43653287743868	2.89093749198708	0.0268606877147744	0.217804706012914	-4.3317677429918
P58005-1	SESN3	-0.194414031404615	3.24448887113074	-3.14498534255515	0.0192640948570361	0.18821821268286	-4.33239089130106
P54920	NAPA	-0.0694092118787469	3.32624596142033	-3.48523527935047	0.012524438016526	0.150460588368791	-4.33850728997386
Q86UP2-1	KTN1	-0.214414444868703	3.30507531716732	-3.72475770317962	0.00934750760939126	0.125256601965843	-4.3411632447803
Q8N474	SFRP1	0.444751905460131	3.28750480853133	3.19943544370062	0.0179606903982316	0.182748585742702	-4.34196844414456
P50416	CPT1A	-0.235439183449708	3.28611855452428	-3.14314174790846	0.019309989710239	0.18821821268286	-4.34201825177479
Q15036-1	SNX17	-0.142096678107732	3.30829462897082	-3.13674831123786	0.0194700721331406	0.18821821268286	-4.34359069310802
Q9HD47	RANGRF	0.637518253218323	3.29414287477962	2.66367270311054	0.0364253081731651	0.244538642044295	-4.34739819088871
Q5TAQ9-1	DCAF8	0.166904859790166	3.38224423436217	2.74272534332322	0.032739731690377	0.232779433899347	-4.35420786826311
Q86W42	THOC6	-0.105341339732661	3.33604357697271	-3.19066156943125	0.0181640631206331	0.182767124416562	-4.35518884669721
Q9UNM6	PSMD13	-0.0802822050215271	3.30305436034603	-3.67606542490323	0.00991326026603323	0.129471430375093	-4.37302685209824
Q96EK4	THAP11	0.141529660738031	3.39516278145158	2.77750819288431	0.0312459851846091	0.228795738510252	-4.37406527171579
Q9Y221-1	NIP7	-0.296163181602569	3.31050187400082	-3.12270623542353	0.0198267492243988	0.18821821268286	-4.37677183756982
Q96L58	B3GALT6	-0.259043772751172	3.30366527118381	-2.34715010976302	0.0562056451061669	0.304617590727026	-4.3776669155315
P19367-3	HK1	-0.186022600196186	3.28958809347409	-3.47389832958188	0.012701845993677	0.151968514567207	-4.37919069383364
P36404	ARL2	-0.198246976849406	3.30819734703369	-3.12878104550663	0.0196715818973919	0.18821821268286	-4.38071261864154
Q6P1K2	PMF1; PMF1-BGLAP	0.179018626123319	3.32809002981919	3.01884672314969	0.0226956482039685	0.20060269634274	-4.38253860244921
Q9Y3C8	UFC1	-0.123893407641613	3.33043335643048	-2.98371848792239	0.0237652446823362	0.20492553329685	-4.38426890285896
Q9UJ83	HACL1	-0.144457000728022	3.27565470685382	-3.1885171124053	0.0182141506356497	0.182960733521518	-4.38452347679228
P53350	PLK1	0.168911505491559	3.392330426225	3.30244745981757	0.0157499592290239	0.169927096351787	-4.39538288484254
P00387-3	CYB5R3	-0.259916721343368	3.31698814785787	-3.07378117915104	0.021125959084044	0.193102218094263	-4.39722248615702
P0CAP2-1	POLR2M	-0.0965282815502181	3.2826550456346	-3.19991272853526	0.0179496985788324	0.182748585742702	-4.39751615136047
Q8WUU5	GATAD1	0.250384005444754	3.42275672928502	2.46917284048456	0.0474968510556071	0.282117820986319	-4.39975865221526
Q8NC56-1	LEMD2	-0.190750850563664	3.32131960027717	-2.59792622486136	0.0398263722438768	0.256081280262931	-4.3998739201568
Q9NYA4	MTMR4	-0.155615731456745	3.30859055254687	-2.8582044617268	0.0280540830228462	0.221236456011008	-4.40177013017607
Q8IWA0	WDR75	-0.189079332501697	3.28900387523406	-3.33949876945033	0.0150289830589341	0.164264578295039	-4.4024852051141
Q9BSM1	PCGF1	-0.150562546236148	3.34155395047212	-2.93721710039152	0.0252656357259824	0.210285415359108	-4.40429728204606
Q8NFH4	NUP37	-0.146047853478967	3.32275009559335	-3.18518934063444	0.0182921744492232	0.183260943151165	-4.41002224829728
Q9NX40	OCIAD1	-0.212098150829075	3.32047537207526	-2.86280320271141	0.0278830356745983	0.220920099049264	-4.41025779782155
Q5BJF6	ODF2	0.124798240217273	3.3879856173059	3.2618436436692	0.0165837449685397	0.17580868874876	-4.41620731789033
P30519	HMOX2	-0.287856038006306	3.31007045350244	-2.94880491121478	0.0248824282657654	0.209174742008316	-4.417755027413
Q8IVL1-1	NAV2	0.166717099823124	3.34919238945463	2.57952692656336	0.0408372757790995	0.259591791005661	-4.41834215610681
Q96NB1	FOPNL	0.294109442500787	3.4397826914417	2.64160315482562	0.0375312654780299	0.247987651580671	-4.41873548803359
Q5ZPR3	CD276	-0.200683457496493	3.28972579528228	-2.94403560539317	0.0250393846821357	0.209337181435876	-4.41888703324722
Q9Y3A2	UTP11L; UTP11	0.314850753294484	3.43150449335905	3.10720635271954	0.0202287126464556	0.189110167948183	-4.41991955282154
O00462	MANBA	-0.2090247250101	3.32778937490355	-2.70991875388102	0.0342185958647942	0.236916620163644	-4.42364722193071
Q8WWK9-1	CKAP2	0.178206361621914	3.37080718232864	3.23509864257994	0.017159206866437	0.179075834898954	-4.42429928963372
O43490-1	PROM1	-0.199690238580426	3.28943437232276	-2.7433134918845	0.0327138493080977	0.232779433899347	-4.42561330347876
Q8NB37	PDDC1; GATD1	-0.187098683038228	3.30754689876555	-2.76998314248697	0.0315628625784811	0.229804282578799	-4.42673110383703
P07951-2	TPM2	0.332723901311509	3.32390938513054	2.10592135796153	0.0786414111805677	0.357460959911671	-4.42828463740301
Q96EZ8-2	MCRS1	0.124095760886295	3.36400049948171	3.03596121334907	0.0221934951186134	0.198662206629576	-4.43099823533436
Q9UHR6	ZNHIT2	-0.135276137539704	3.31821018489394	-2.82322014456694	0.0293927559213879	0.226223665175336	-4.43233808895522
P04899-4	GNAI2	-0.223498255278224	3.34235845352654	-3.12739856044461	0.0197067780877142	0.18821821268286	-4.4391939154893
P18433	PTPRA	-0.209477689661962	3.34409215679899	-2.36013206693433	0.0552046617106631	0.301689423704277	-4.44618367377378
Q53GQ0	HSD17B12	0.145522734056063	3.26197691682675	2.96422505896478	0.0243821727061176	0.207132307862661	-4.45241566189366
Q96ME1	FBXL18	0.154764914257551	3.33803978996772	2.96965518148378	0.0242086020070087	0.206096103490417	-4.45457374271302
Q8IY47	KBTBD2	0.192191349748722	3.35133091561277	2.73726491336447	0.0329810720822799	0.232990780328626	-4.45510858617414
O15431	SLC31A1	-0.193514264087065	3.41057127360033	-2.48957383493139	0.046184548798744	0.278020194925054	-4.45740584969815
P58215	LOXL3	-0.252439078858393	3.31141122664715	-2.54488721284063	0.0428147638686158	0.265829812009902	-4.45812985217149
O75787	ATP6AP2	-0.205815055752083	3.29896131383586	-2.33840900024483	0.0568902538697325	0.306895894466351	-4.46052229799843
Q6ZWJ1-1	STXBP4	0.107958098793739	3.3566710272715	3.11087932809872	0.0201326668346776	0.189110167948183	-4.46382447500664
O94919	ENDOD1	-0.20696046024896	3.32556619867895	-2.44851642230331	0.0488655109206004	0.28794980049958	-4.46394676323682
P14866	HNRNPL	-0.0936609236493035	3.30485588786715	-4.14797121833125	0.00569540274102702	0.0946878371336998	-4.46500454231445
Q86WR0	CCDC25	-0.0985843011135715	3.31114384718	-3.30818730257812	0.015635834995971	0.168967894311299	-4.46664537155645
Q9UHA4	LAMTOR3	-0.184133917555632	3.33325598685687	-2.72708943847114	0.0334358863018741	0.234484759866108	-4.46910578592505
Q14699	RFTN1	-0.270024025704843	3.30943047216659	-2.64992032933804	0.0371103427496451	0.247417100461583	-4.47267322622109
Q53G59-2	KLHL12	0.198452642452622	3.40000451160821	2.39958850137678	0.0522747632951058	0.296465098874964	-4.47288014147576
Q13111-1	CHAF1A	0.0870898084079131	3.34909760354251	3.4494290630447	0.0130942426410836	0.153376618348356	-4.47440111604427
P33908	MAN1A1	-0.21010421942693	3.31990797554471	-2.44189615380973	0.0493128566333906	0.289567168662329	-4.47456238001789
Q24JP5-2	TMEM132A	-0.175606601023373	3.30901106563921	-2.50303893357353	0.0453393136009949	0.27490805531825	-4.48208550632996
Q96T37-1	RBM15	-0.0704559245503383	3.31648994850303	-3.45033966066219	0.0130794037974205	0.153376618348356	-4.48271735752087
P51687	SUOX	-0.169443433186538	3.32628270641247	-2.68293710783324	0.0354882124970772	0.241031226592036	-4.48327906613747
Q9BZ67	FRMD8	0.281438309366245	3.37114129194112	2.8118394927888	0.0298428697547863	0.226223665175336	-4.48726806158604
Q9NX62	IMPAD1	-0.218475207580462	3.26448210383063	-2.64291586151191	0.0374644955601203	0.247979651739055	-4.49124709551532
Q9P0P0	RNF181	0.269898441234188	3.3687580681058	2.60527958268076	0.0394297961041962	0.25450831782092	-4.49566300109268
Q5J8M3-1	EMC4	-0.27400190147544	3.29981590160333	-2.48565159317765	0.0464338596733107	0.278579623741586	-4.49578976226677
O60814	HIST1H2BK	-0.138156749558038	3.29926260186265	-3.98125536727566	0.00690032721296504	0.106037138364371	-4.49605993301032
Q9C0D3	ZYG11B	0.238131751407121	3.38828182113753	2.80963974205591	0.0299307200869284	0.226338402463228	-4.49959286386587
Q9BTV4	TMEM43	-0.299802906302432	3.32470842247532	-2.89671537351475	0.0266557593736336	0.217680802993965	-4.50033771784794
Q9P2B7	KIAA1430; CFAP97	0.159975562735275	3.40671838818947	2.59481272255035	0.0399955575907941	0.256185693937209	-4.50289153570964
P20020	ATP2B1	-0.207383521526676	3.32857996732351	-3.36148664035108	0.0146182501331857	0.162425001479842	-4.5030671940206
P01137	TGFB1	-0.315753740571841	3.30639990098389	-2.60046605596295	0.0396889206782976	0.255688238985187	-4.50332294866958
O00213	APBB1	-0.152738367243136	3.30377371512401	-3.20453604689187	0.0178436024300171	0.182748585742702	-4.51277595371968
Q9H871-1	RMND5A	-0.0957667038365392	3.33528676278113	-3.03800197543462	0.02213442424518	0.198662206629576	-4.51450369671073
Q96DB5	FAM82B; RMDN1	-0.211498002205961	3.29582854456463	-2.95106050312899	0.0248085671131451	0.208815828716171	-4.52019355682009
Q9UHG3	PCYOX1	-0.419114324963495	3.30006091209613	-2.74660619633918	0.0325693515426954	0.232638225304967	-4.52019807850477
O15269	SPTLC1	-0.186564623713539	3.31920951499401	-2.57427739488078	0.0411306468451145	0.260222222721687	-4.52163387517015
Q9UQB8	BAIAP2	-0.1164807674997	3.29568569030467	-3.34856849877667	0.0148580497098412	0.163194972222846	-4.52258529775216
Q9UBT6	POLK	0.179491921366588	3.41109995773538	2.38277213572575	0.0535031496786307	0.298743027859019	-4.52351059185725
Q7LBC6-1	KDM3B	0.112618292394895	3.31694977528361	3.73124271789365	0.00927489144890196	0.125256601965843	-4.52574580176483
Q9Y4F1	FARP1	-0.208647533602938	3.33400775082159	-3.10611037141577	0.0202574680532074	0.189110167948183	-4.53944382315883
O95864	FADS2	-0.259642182621386	3.30689757690455	-2.81579172660597	0.029685724460879	0.226223665175336	-4.54364946580899
Q86WA8	LONP2	-0.180514770803458	3.31229802448394	-2.73341189926942	0.0331525095824302	0.233812436002402	-4.54441463942993
Q9NVH1-1	DNAJC11	-0.28794519808335	3.25975069218275	-2.72626790285276	0.0334728972438303	0.234484759866108	-4.54472232464827
Q9P2Q2	FRMD4A	0.185308639263714	3.35434072121658	2.52654315890265	0.043902663478297	0.270356475463777	-4.54488507902197
P36268-3		-0.198155901135347	3.31843205730168	-2.31658496716567	0.0586376040001197	0.311555865821413	-4.54827917888398
O14646	CHD1	0.100135910895093	3.33680593507763	3.4299988292551	0.0134153181807499	0.155476509135944	-4.54845586486713
Q99538	LGMN	-0.161073383867046	3.29670691071461	-2.61050852151161	0.0391503373584584	0.253436966475045	-4.54933091820741
Q9BTT4	MED10	0.813795028788999	3.27057206822775	2.81467313539062	0.0297301107868783	0.226223665175336	-4.55151519427748
Q06203	PPAT	-0.0870038555569447	3.30164107076082	-3.5412334442368	0.0116871920136798	0.146166811919314	-4.55153989451374
Q8N6H7	ARFGAP2	-0.121274860672237	3.30619050784647	-3.24715754944757	0.016897087371434	0.177445901863022	-4.55382504003829
P60468	SEC61B	-0.354370282885392	3.32714307388248	-2.48471339316571	0.0464937041229034	0.278629532758008	-4.55424469075473
Q6UUV7-1	CRTC3	-0.166766884748822	3.30224216363797	-2.57706574058574	0.0409745432866933	0.259725108818207	-4.55571643270506
Q6P4F7	ARHGAP11A	0.197716646628433	3.39003408902042	2.70654343338346	0.0343747400896176	0.237184041233667	-4.55717781077961
Q9NQR7	CCDC177	0.232048757904714	3.37124393406452	2.31171205074502	0.0590353072713495	0.312175553353281	-4.56093462132578
Q13641	TPBG	-0.232396867846788	3.31802019353475	-2.30974801675973	0.0591963919607368	0.312175553353281	-4.56359469333088
Q92542-1	NCSTN	-0.159622401876322	3.30204477962042	-2.7453713799213	0.0326234605092456	0.232776555284287	-4.56390186441274
P51688	SGSH	-0.260226182443965	3.27712826622159	-2.02371448124969	0.0882302424320897	0.376753510896244	-4.56808692987321
P57772	EEFSEC	-0.0895026766425529	3.32828395661146	-3.11421142704988	0.0200459627922102	0.188634762230068	-4.57149257352761
Q9UID6	ZNF639	0.205201237197772	3.41171688265473	2.75018322482496	0.0324131481244048	0.232143076007146	-4.57157825842084
Q9Y3L5	RAP2C	-0.176200197576081	3.33243409477561	-2.32340820552564	0.0580853901249455	0.310592269622613	-4.57160531335596
Q96DU7	ITPKC	0.204634325282766	3.38028290746892	2.23006336350039	0.0661306156026988	0.328415543772616	-4.57219256412699
Q4G148-1	GXYLT1	-0.211873925844214	3.30516697618329	-2.61305160117069	0.0390151822472294	0.253051036840694	-4.5775489723361
P11047	LAMC1	-0.181560106453022	3.32615176757073	-3.052383317225	0.0217229432205314	0.196769215511414	-4.57829722958348
Q9NRG9-1	AAAS	-0.184258904332379	3.2821395214519	-2.97217100187415	0.0241286376146255	0.205938690468778	-4.57982659828979
Q96HE9	PRR11	0.168975871698089	3.36207683249451	2.64235431358011	0.0374930428674123	0.247979651739055	-4.58049872671568
Q69YH5-1	CDCA2	0.193256919474664	3.38705828699387	3.13129235569786	0.0196078218835496	0.18821821268286	-4.5829590408431
Q96RT1-8	ERBB2IP; ERBIN	-0.121699366420469	3.37091689432038	-2.97569607840632	0.0240170735290992	0.205290027141393	-4.58384130170242
P34059	GALNS	-0.219552934460911	3.30111217822803	-2.66590246296264	0.0363155105354726	0.244046058763958	-4.58544406284098
Q9H4G0-2	EPB41L1	-0.142814325306505	3.3310291237417	-2.98442450258676	0.0237432192724717	0.20492553329685	-4.58818156147884
P51580	TPMT	-0.118797880300085	3.32021868212674	-2.76935392078024	0.0315895140679215	0.229804282578799	-4.59124647586589
O95197	RTN3	-0.182621881677692	3.32941875406362	-3.09832543724971	0.0204630033418997	0.189892136275247	-4.59139993070706
Q14D33	CXXC11; RTP5	-0.245127592575802	3.2904219881765	-2.27804902895473	0.0618601809919331	0.316803645429141	-4.59270428746127
P08572	COL4A2	-0.203638692460875	3.30695507004983	-2.63282576291332	0.0379809783821917	0.249482897216357	-4.59884642561343
Q6P1M0	SLC27A4	-0.255971436585313	3.28000673578252	-2.40936832776613	0.0515739490901668	0.295590640636542	-4.59920017957697
Q9Y6R0	NUMBL	0.175874721472826	3.3610316387228	2.97604962088207	0.0240059151258698	0.205290027141393	-4.60017275871448
Q15269	PWP2; LOC102724159	-0.179707430849158	3.28383902750482	-3.08114374142657	0.0209246794699874	0.192611248878326	-4.60431169867996
P06865	HEXA	-0.220556981736941	3.26882768225657	-2.76676594735316	0.0316993841215718	0.23035344209819	-4.60943381857343
P11233	RALA	-0.238400217964067	3.33864150849869	-3.03456970054408	0.0222338709518315	0.198662206629576	-4.61170807083335
Q96HH4	TMEM169	-0.221417442413954	3.26571698320924	-2.14466327665208	0.0744964481103425	0.347604189820635	-4.61442426736898
Q6SJ93-1	FAM111B	0.166625801903746	3.35383439641998	2.82004604263536	0.0295175581534601	0.226223665175336	-4.61458899945866
Q9Y4B5	SOGA2; MTCL1	0.112233206584592	3.35303153910832	2.89167594304903	0.0268344023705396	0.217804706012914	-4.61460449568996
Q9UBT7	CTNNAL1	0.182807985223676	3.35345166630542	2.69397751370173	0.0349627499882447	0.239105707775653	-4.61544578622088
O43169	CYB5B	-0.245186544681019	3.27609977400891	-2.80248763256828	0.0302182693434222	0.226771714490192	-4.61650689632571
Q14CB8-2	ARHGAP19	0.192672684837412	3.392700630453	2.37082012462808	0.0543944841303991	0.30031037635283	-4.62117100382744
O60524	NEMF	0.178079165807888	3.36370777308744	2.80349405707118	0.0301776280358988	0.226771714490192	-4.62632735548913
Q16864-2	ATP6V1F	0.551184470485994	3.30610713862461	2.68179366524038	0.0355431122198406	0.241031226592036	-4.63251195799124
P43243	MATR3	-0.103828508847355	3.32162487844874	-3.93149376123138	0.007313113658569	0.109370226590206	-4.63715112260069
O15228	GNPAT	-0.172400292046036	3.29710047799825	-2.74141259752589	0.0327975799404454	0.232779433899347	-4.63840775802561
O95361-1	TRIM16	0.161159825015527	3.33058634796829	2.34525639745764	0.0563532314857373	0.304734988663793	-4.63921500779603
O14757	CHEK1	0.180790950335626	3.31822792522002	2.88936479118968	0.026916760683387	0.217804706012914	-4.64299090279545
Q9UBP9	GULP1	0.0774304272642515	3.33155992454342	3.10887419961774	0.0201850380882917	0.189110167948183	-4.64455018507865
O15054	KDM6B	0.151447903991683	3.36356630250266	2.96391425551962	0.0243921478960656	0.207132307862661	-4.64781847550812
O43920	NDUFS5	-0.293191329517182	3.27164349853513	-2.4737045797655	0.0472020002817928	0.2813281079506	-4.64967199477073
Q15742-1	NAB2	0.122248519556972	3.36420949755823	2.99974264549577	0.0232707294564482	0.202976417550358	-4.65944367218585
P07305	H1F0	-0.137771567619761	3.32138867190128	-2.6494564674317	0.0371336858434758	0.247417100461583	-4.65952406134795
P32189-3	GK	-0.23757070034497	3.27047934635586	-2.22757823032559	0.066359887820732	0.328854473667829	-4.66083049892272
Q15287-1	RNPS1	-0.119937603819266	3.30534303400008	-3.01768168540414	0.0227302752891743	0.20060269634274	-4.66276398193778
Q9UJJ9	GNPTG	-0.255755104174707	3.24363926493749	-2.23676229616762	0.0655166432653056	0.327095014811883	-4.66340992760928
Q8N283	ANKRD35	0.207847067727922	3.37007161827931	2.26816201372546	0.0627161636441342	0.319299617337157	-4.66516220623625
Q15006	EMC2	-0.184279536291973	3.30048417491099	-2.83809640159787	0.0288153277611079	0.224491506976073	-4.6665678043603
Q13503	MED21	0.60358500461623	3.39864566630319	2.39803145683567	0.0523872542883618	0.296465098874964	-4.66804168894985
Q9UK45	LSM7	0.283087796204943	3.22956254331669	2.86247140481491	0.0278953391391362	0.220920099049264	-4.66838157964482
Q9UI30	TRMT112	-0.152863826561285	3.32234320976878	-2.71895404419331	0.0338043250590305	0.235435527957904	-4.66923989576373
Q92522	H1FX	0.16046098976996	3.3232699577332	3.02181473526415	0.0226076908654915	0.200094489826675	-4.66963671161406
Q15390	MTFR1	-0.11354791268547	3.3316006717795	-2.81126643789224	0.0298657289273239	0.226223665175336	-4.67261688897646
Q9NRZ9	HELLS	0.164807515379784	3.32774237546207	3.48507496891058	0.0125269275947011	0.150460588368791	-4.67275716197477
Q86WC4	OSTM1	-0.214998443096659	3.2554178451717	-2.40536329588383	0.051859752332251	0.295676338618052	-4.67303756103428
Q8NBM8	PCYOX1L	-0.460142671447028	3.27385989111231	-2.3565839750151	0.0554763840821803	0.302751393941493	-4.67366003278137
Q9NUQ8	ABCF3	-0.0713785953496344	3.32470016835501	-3.12148137842883	0.0198581961609007	0.18821821268286	-4.67532026989402
Q6NYC1-3	JMJD6	0.0937001637089277	3.34520719287325	3.00002053562029	0.0232622522674719	0.202976417550358	-4.6755939202316
Q92900	UPF1	-0.0679988051086926	3.31889823652019	-3.58482826070591	0.0110780124067791	0.140307529537655	-4.67565249383113
Q15013-3	MAD2L1BP	0.191401315528658	3.28884588892155	2.33570804030415	0.0571035429385446	0.30760438854363	-4.68123333275954
P18621-3	RPL17-C18ORF32; RPL17	0.12554463943707	3.26696151591644	3.40701619059472	0.0138062949703277	0.157481982571807	-4.68163942845615
Q9NY61	AATF	0.0999955047210679	3.3832068355069	3.13329892987125	0.0195570380182742	0.18821821268286	-4.68185701678964
O75864-1	PPP1R37	-0.293517167013701	3.30683439879095	-2.23398849538414	0.0657701529900282	0.32762827140014	-4.6832376971515
Q15717	ELAVL1	-0.0842740826861134	3.31222201247746	-3.35558081213573	0.0147273501728805	0.162820271166218	-4.68661306304777
Q8IZH2-1	XRN1	0.102708786176759	3.33737762578278	3.16984771437858	0.0186566124911164	0.186010868587023	-4.69058078982015
Q9BX63	BRIP1	0.183127378476287	3.33997148273416	2.99143606034661	0.0235256735320421	0.204301174204784	-4.69166646192888
O95714	HERC2	-0.10937110570559	3.28647417576755	-3.48282945759491	0.0125618570150736	0.150562508051866	-4.69225161817469
P09486	SPARC	-0.206257086057873	3.31747392265799	-2.46191918292985	0.0479728284776629	0.283437346384781	-4.7067413711897
O60343-1	TBC1D4	0.081155150949077	3.34217151776774	3.35147652884275	0.0148036947038611	0.162925107691478	-4.70695014200283
Q9NS69	TOMM22	-0.264528016849948	3.28987579305835	-2.18001717581608	0.0709087948163223	0.339834710493104	-4.70696812186378
Q9H3H3-3	C11orf68	-0.143655399107662	3.33991501135768	-2.74898502534442	0.0324653824207008	0.232143076007146	-4.70907883994406
O60427	FADS1	-0.293894721237952	3.29787650799144	-2.68933246888383	0.0351828127067002	0.239557769446028	-4.70959010275867
Q9H0V9-2	LMAN2L	-0.167126672902083	3.33804143658867	-2.67575175053964	0.03583470397584	0.242272973398717	-4.71918905806558
Q8NEJ9	NGDN	0.145256176441862	3.39161385705343	2.81201593759592	0.0298358351411247	0.226223665175336	-4.72133422496378
P12532	CKMT1B; CKMT1A	-0.189551673064455	3.30814178249332	-2.94671573374987	0.0249510515461144	0.209337181435876	-4.72190074609219
Q05048	CSTF1	-0.0981584041197386	3.3187813223875	-3.18022513670691	0.0184092433947858	0.184092433947858	-4.72867389824117
Q9Y5J7	TIMM9	0.363201539716998	3.1924241992353	2.51701458701077	0.0444792164598447	0.271412340875191	-4.73936077508765
Q9H773	DCTPP1	0.220653080736525	3.33080455012758	3.00154622724574	0.0232157696246861	0.202976417550358	-4.74024336392711
Q92823-5	NRCAM	-0.188524720073654	3.34442535417353	-2.78924915783107	0.0307583515348905	0.227417990946656	-4.74177315023656
Q9BZL1	UBL5	0.225454414510727	3.36384609582635	2.47548435325282	0.0470867279996847	0.2813281079506	-4.74281201265349
Q14781-1	CBX2	0.196163658100798	3.390057276401	3.19855018440641	0.0179810972378154	0.182748585742702	-4.75103390496647
Q02790	FKBP4	-0.0712064852576918	3.29433200924149	-3.9457385837169	0.00719221101142427	0.10853111210933	-4.75163633670407
Q9Y2J4-4	AMOTL2	-0.25666421922092	3.37229072132104	-1.86964087980175	0.109485325787058	0.412803423057564	-4.75296071160967
Q8WXG6-2	MADD	0.155728228242893	3.33073243769026	2.71700289120606	0.0338933314295248	0.235565685246697	-4.75306454603206
Q9H6Y7	RNF167	-0.151068209975123	3.32711958076073	-2.40449439832909	0.0519219758855803	0.295676338618052	-4.75460506943924
Q5T8I3-1	FAM102B	0.130365151696173	3.34568856850117	2.81477202372413	0.0297261839793227	0.226223665175336	-4.75463198208148
Q14186	TFDP1	0.159054349263511	3.36120711915045	2.65963460386813	0.0366250505948884	0.245183201968077	-4.75589378266102
P62424	RPL7A	0.168498782674907	3.30796806260828	3.53196451977287	0.0118214138292017	0.146673097510466	-4.75708436217612
Q5F1R6-3	DNAJC21	0.123010004709275	3.32807688452776	2.8218741345682	0.0294456103841289	0.226223665175336	-4.7597723220189
Q9NY27	PPP4R2	0.119663326769013	3.34583817995031	2.99096005517296	0.023540374102402	0.204301174204784	-4.76175216156403
Q7Z7K6-3	CENPV	-0.117575712548856	3.32047426379375	-3.02248539284338	0.0225878669631796	0.200094489826675	-4.76253897302554
O94766	B3GAT3	-0.177930596355575	3.29074043704114	-2.58153705915563	0.0407255254714798	0.259127275079691	-4.76287942888052
P08240-1	SRPR; SRPRA	-0.257806502914311	3.29360044345553	-2.2429449922496	0.0649551967268122	0.32604496931507	-4.76471574276084
P09543-1	CNP	-0.162842833036883	3.29644128772122	-3.17321599538954	0.018575927837778	0.18548243891671	-4.76622189755005
Q86SQ0-1	PHLDB2	0.137876474634101	3.36089375992505	2.5068386572471	0.0451037505584802	0.274059108593875	-4.76681559978542
Q8NEH6	MNS1	0.301131818910779	3.40628634428144	1.97291863846926	0.0947371004088958	0.388932948982599	-4.76799516647491
Q16850-1	CYP51A1	-0.181431648836981	3.31877288619287	-2.79223392023284	0.0306356884014268	0.227417990946656	-4.76799644059355
Q9P2K2	TXNDC16	-0.38226611750228	3.30726121141712	-2.27544955152944	0.0620840576788749	0.316803645429141	-4.77110874400886
Q96M96-1	FGD4	-0.135406112888749	3.31493911214029	-2.82989285383448	0.0291322324010802	0.225726189532549	-4.7729255368856
Q9BRX8-1	FAM213A	-0.19870257789801	3.28998806878064	-2.69299112572841	0.0350093581086441	0.239105707775653	-4.77758665269191
Q86UW6	N4BP2	0.103954134975232	3.34985735192569	3.03890267191642	0.0221084072749209	0.198662206629576	-4.77771578736763
Q63ZY3-1	KANK2	-0.128606731522775	3.30274738644069	-2.61968954690797	0.0386647239510386	0.251594052262075	-4.7780050135495
Q6R327-3	RICTOR	0.0936362638595437	3.34982164790683	2.91279604737349	0.0260942164671759	0.214554247892867	-4.77821600724726
Q9BY67-3	CADM1	-0.119724322056751	3.36847365477972	-2.63836716642852	0.0376964016320447	0.248651415781535	-4.7855104531292
O00161	SNAP23	-0.198469327357002	3.31125075362487	-2.676964747742	0.0357759595041733	0.242272973398717	-4.78646234212798
P0C1Z6	TFPT	0.159377694274702	3.39575227471989	2.52031155786702	0.0442788270393545	0.270929809281895	-4.79661449246459
P56179-3	DLX6	0.15601872198825	3.40870749498482	2.31904624747405	0.0584377838613745	0.311234619929419	-4.79835025599356
Q9NXR1-1	NDE1	0.129312712781331	3.39080283655558	2.90484242623265	0.0263703521756438	0.215728155771445	-4.8028062780022
Q76G19	PDZD4	0.210512047145957	3.37182965627706	2.09460787162758	0.07989560062222	0.360229154891571	-4.80644191624315
Q15771	RAB30	-0.172217417225907	3.31575790520504	-2.21397961695822	0.0676290287354061	0.332195375753094	-4.813447015553
P52435	POLR2J	0.686493042646562	3.28418008523238	2.69035704617043	0.0351341461516424	0.239557769446028	-4.81401392036642
O15127	SCAMP2	-0.147630751072779	3.30021337339904	-2.34715744266136	0.056205074398914	0.304617590727026	-4.81469549339563
P08183	ABCB1	-0.117890943496289	3.34746865964488	-2.81201802570218	0.0298357519018118	0.226223665175336	-4.81553664956246
P41567	EIF1	0.215449390240647	3.32738825856688	3.06950521237924	0.0212438190794064	0.193914969798397	-4.81776863077569
P15309-2	ACPP	-0.154206049925239	3.29222220783994	-2.34657598839663	0.0562503467259016	0.304617590727026	-4.81802822285513
Q6SPF0	SAMD1	0.106701639999044	3.35380718478117	2.8578500563573	0.0280673115834861	0.221236456011008	-4.82003727184338
Q9NPD8	UBE2T	-0.0812230347846653	3.29587084736017	-3.03534729058085	0.0222112987797769	0.198662206629576	-4.82191631343738
Q6ZV73-1	FGD6	0.139023796020713	3.37019203389732	2.74151062777896	0.0327932563139469	0.232779433899347	-4.82478958629727
O75051-1	PLXNA2	-0.249976862260936	3.3366955733432	-2.12400373368701	0.0766783010929836	0.352362563321667	-4.82715205558621
O00628	PEX7	-0.16856174021248	3.31658389343228	-2.1641169883457	0.0724999164300101	0.343145880657545	-4.82941554425707
Q99583	MNT	0.227876075392701	3.40051641429957	2.38197190186794	0.0535623497252523	0.298743027859019	-4.8327974432548
P42575-1	CASP2	0.124333792391615	3.36894385090654	2.88938059933609	0.026916196435087	0.217804706012914	-4.83335499134665
Q92547	TOPBP1	0.0723599401245487	3.34314873627812	3.28724309587086	0.0160566880463151	0.17185273148612	-4.83340302657479
Q9Y2Q0-3	ATP8A1	-0.636151795594371	3.183316550247	-2.08651679302176	0.080805015328036	0.362847142057832	-4.83494684928576
Q9UBG0	MRC2	-0.155572782355268	3.27011539459852	-2.82348964818183	0.0293821854061005	0.226223665175336	-4.83499411192584
O15160	POLR1C	-0.0916140839264779	3.29774982972426	-2.75321676515265	0.0322813047066263	0.232065173320168	-4.83675275082683
P41236	PPP1R2	0.143523065180947	3.36459609584624	2.78347992842404	0.030996938065338	0.227469315484956	-4.84021614411314
Q6PCD5	RFWD3	0.139381371592191	3.4210563030852	2.3784522793746	0.0538235377954903	0.29912298194214	-4.84143438198679
O94905-1	ERLIN2	-0.377025922069005	3.28090406484458	-2.98652231643015	0.0236779041003536	0.20492553329685	-4.84220218051588
Q96CS3	FAF2	-0.222248397702445	3.29885362024685	-2.64840968176147	0.0371864209201214	0.247417100461583	-4.84223012955488
Q6P0N0	MIS18BP1	0.227228545727581	3.3586437015473	2.51051315171144	0.0448771754753182	0.273342796076938	-4.84346998672029
Q92576-1	PHF3	0.118463954882194	3.36753451629416	3.22964163302647	0.0172792781181197	0.17999688380712	-4.84480214800594
Q9HBH9-1	MKNK2	-0.223425109215291	3.25585739879268	-1.831092082888	0.115556031726903	0.424644318294181	-4.8454129751868
O14786-1	NRP1	-0.237451628291124	3.32295434484451	-2.69568481338887	0.0348822338513887	0.239084750896808	-4.85064228946377
P22626	HNRNPA2B1	-0.144584623562421	3.30201169591068	-3.86683384737212	0.00789105525453419	0.113011813719897	-4.85624599182963
Q9H8Y5	ANKZF1	0.0999186729318123	3.3642641744871	2.57316401518607	0.0411931540806767	0.260371822962768	-4.85679996385263
P07858	CTSB	-0.159089233735209	3.31424529110105	-2.72585775801124	0.0334913909942777	0.234484759866108	-4.8593988557805
Q96JN8-1	NEURL4	-0.104541260465736	3.33354016247072	-2.86312689981953	0.0278710382117343	0.220920099049264	-4.85950928314263
Q96SB4-2	SRPK1	0.0871561612322535	3.34106598569358	2.99920867834057	0.0232870277840531	0.202976417550358	-4.85956433901399
Q70EL1-1	USP54	0.159370098049309	3.38057946093602	2.4731507889745	0.0472379285737947	0.2813281079506	-4.86102179615737
Q8IXJ9	ASXL1	0.105665493738628	3.37974565618632	2.69532392683737	0.0348992367726983	0.239084750896808	-4.86231351095407
Q32P28-1	LEPRE1; P3H1	-0.317142317452513	3.2900235714922	-2.7050089501948	0.0344459769025095	0.237192235608236	-4.86232470418175
Q76N32	CEP68	0.218626406825293	3.36084573955483	1.93910706565315	0.099333170047349	0.394974622740201	-4.8678466634308
Q9Y294	ASF1A	0.212341351510572	3.39931490005175	2.79705439511394	0.0304386879163524	0.227417990946656	-4.87278723579737
Q9UGP8	SEC63	-0.290893422717359	3.31489082305038	-2.85522304112622	0.0281655767552562	0.221750134265824	-4.87315685684186
O76064	RNF8	0.167937823784088	3.3936324668439	2.43036336904504	0.0501024242917432	0.291992751937531	-4.87694737383839
P13591-2	NCAM1	-0.221239372475888	3.32518954524695	-3.13579887888898	0.0194939672621904	0.18821821268286	-4.87727339270836
Q96EP9	SLC10A4	-0.190890038813672	3.34496060550098	-2.31975637487195	0.058380263269534	0.311234619929419	-4.87962007922383
O15287	FANCG	0.13617854964434	3.34393496690104	2.65446547043535	0.0368824383944988	0.246373217590371	-4.88121358001143
P58107	EPPK1	0.231989409727918	3.2602142826965	2.40540261137149	0.0518569387113063	0.295676338618052	-4.88131160688618
Q9H173	SIL1	-0.270591209073373	3.31963962528741	-2.18096950861738	0.0708146387284797	0.339626399055701	-4.88456329156781
Q86X27-1	RALGPS2	0.106123657803527	3.33842930877984	2.73710873038556	0.0329880029267224	0.232990780328626	-4.88567998862427
P36543	ATP6V1E1	0.139370322158432	3.36813968455725	2.96969053629728	0.0242074762887185	0.206096103490417	-4.88898879445586
Q9H204	MED28	0.604161708842404	3.24570666795525	2.29387750349553	0.0605148781092984	0.314302080102558	-4.88984427851742
Q9Y230	RUVBL2	-0.0859255535629891	3.30068563142209	-3.40668185654471	0.0138120740529483	0.157481982571807	-4.89073131557557
Q96DE0	NUDT16	-0.229734476656313	3.28566711919076	-2.51253788447033	0.0447528393826709	0.272833506700541	-4.89278532170837
Q6FI81-1	CIAPIN1	0.074117919902567	3.33589830978583	3.15868636573846	0.0189267104385575	0.187085633359978	-4.89308001827681
O95685	PPP1R3D	-0.110244841886198	3.34934881037734	-2.48840572426754	0.0462586504396964	0.278216299771962	-4.89589417669369
P46977	STT3A	-0.233026786998921	3.34212822327116	-2.367758583558	0.0546252820588172	0.300395368314768	-4.89794756225733
Q96P11-2	NSUN5	0.133032386188858	3.35044907199296	2.99984676276567	0.0232675529117173	0.202976417550358	-4.89853943152565
Q9BVG9	PTDSS2	-0.278733132391805	3.30369694423569	-1.69856564209139	0.139051455035771	0.462125371398643	-4.89868631826059
Q9NSV4-3	DIAPH3	0.155006724300713	3.34691406944183	2.97785600734102	0.0239489897558647	0.205290027141393	-4.90031586506824
Q8NFC6	BOD1L1	0.143487761005736	3.32148301611427	3.37727837503844	0.0143308481678591	0.161303899511473	-4.90197098529952
Q8IWU2	LMTK2	0.177708925610984	3.35892502583204	2.11423139976475	0.0777329537782657	0.354890029809559	-4.90207730474619
Q9BT88	SYT11	0.161707990243738	3.37635296981578	2.27624103836448	0.0620158033192874	0.316803645429141	-4.90350437226826
Q92674	CENPI	0.149275712009315	3.35834900298805	2.52507876685039	0.0439907562653552	0.270371951138198	-4.90357848001662
Q8WVD3-1	RNF138	0.177677457040965	3.39083062288417	2.30132386507343	0.0598925031788969	0.312523186369633	-4.9055449968526
O75582-1	RPS6KA5	0.16906444731619	3.28636908025224	2.23062258183221	0.0660791360225704	0.328415543772616	-4.90681828298904
Q9BRR3	TMEM246	-0.241572462035608	3.33818434488937	-1.97081938055529	0.0950161518399375	0.389362824053566	-4.90865864352854
P50579	METAP2	0.144565358758016	3.33964421319144	3.20074661956747	0.0179305117330215	0.182748585742702	-4.91055339377453
P17050	NAGA	-0.122950191125045	3.31631840375399	-2.56649837344011	0.0415694809038376	0.261792714858717	-4.91665180697825
Q8NF37	LPCAT1	-0.282788891731918	3.2877652363991	-2.20802682992026	0.0681924251110629	0.332767114525944	-4.9183679357325
Q9NPI6	DCP1A	0.0778116499782549	3.31233003774541	2.81693728147328	0.0296403417675775	0.226223665175336	-4.91845950521658
P14923	JUP	0.184702355695547	3.36306801747918	2.78905742426629	0.0307662490429089	0.227417990946656	-4.91900252088147
P50750-2	CDK9	0.123419547559484	3.33916653569848	2.4187730263624	0.0509092715124457	0.293947011514717	-4.92012774334725
Q9BZF1-1	OSBPL8	-0.169556489760269	3.29823826860223	-2.55603086544417	0.0421677981512578	0.264139740503215	-4.92274733234618
P08236	GUSB	-0.203158532741479	3.31917775789345	-2.5834846304354	0.0406175614824029	0.258932123627116	-4.92300749703766
Q9P2W9	STX18	-0.23262909481721	3.30914788793477	-1.99109937808659	0.0923545050630689	0.38480086769453	-4.923034763292
Q9H2P9-5	DPH5	-0.137772438268902	3.24926037897019	-2.58490031151432	0.0405392728844067	0.258898026244211	-4.92394035148887
Q9H981-1	ACTR8	0.0936871217217756	3.36134061797073	2.64477835549762	0.0373699773038072	0.247979651739055	-4.92419252584134
O75528	TADA3	0.181119424097256	3.39495899969251	2.93133382134323	0.0254626248458216	0.211647017519025	-4.92452748581412
P35754	GLRX	0.354589766167406	3.25168259217979	2.38314050343394	0.0534759213493594	0.298743027859019	-4.92660586878289
Q9NR12-1	PDLIM7	-0.0942490282452041	3.31926500470942	-2.97554013316647	0.0240219972057988	0.205290027141393	-4.92841130806781
Q8NCN2	ZBTB34	0.181064808741698	3.3685400264677	2.03839762944757	0.0864346180755411	0.371940874185052	-4.93019922071482
P15151-1	PVR	-0.277439367717176	3.33371689375959	-1.99703279474133	0.0915900289456852	0.383293687655272	-4.93236039040771
Q02127	DHODH	-0.512839701461943	3.21403946114288	-2.23482278832677	0.0656937972385982	0.32762827140014	-4.93255514236157
P28070	PSMB4	-0.0715211464055498	3.30657833537397	-2.91225369477493	0.0261129467905085	0.214554247892867	-4.93788625275432
Q6MZP7	LIN54	0.0960802109240583	3.35514288230643	2.84881867420295	0.0284066868350381	0.222342058171443	-4.94031528898578
P08582-1	MFI2; MELTF	-0.177780468305566	3.3102969553025	-2.06683518519332	0.0830612982362566	0.366125459330868	-4.94039357454993
Q9BUU2-1	METTL22	-0.346942297413178	3.25098152380819	-1.3506751006815	0.224325381692836	0.575633878721563	-4.94056548238307
P57682	KLF3	0.178614680462579	3.44251244941871	2.26291002571777	0.0631758304148898	0.320180078502089	-4.9409352819277
O75151	PHF2	0.185433883027868	3.35931887195456	2.12457332274659	0.0766172813953346	0.352323806004627	-4.94691093093357
O43286	B4GALT5	-0.316421888773429	3.20272596837413	-2.22545461028772	0.0665564561172294	0.329477351968645	-4.94709918781882
Q8TB36	GDAP1	-0.300446722093445	3.28870293363148	-2.36816320568465	0.0545947207278877	0.300395368314768	-4.94779996136668
Q14681	KCTD2	0.141375695664752	3.37160422416814	2.36337503781212	0.0549575180697943	0.301075528264613	-4.9480168031987
Q8NBZ0	INO80E	0.270550694450901	3.35329775647491	1.61084350939872	0.157078501886686	0.488138201595917	-4.94836454417224
Q96H20-1	SNF8	0.179226041894361	3.39011546149515	2.6838425921046	0.0354448017786526	0.241031226592036	-4.95930605948507
P49585	PCYT1A	0.117904737472648	3.31936419560672	2.87388698666963	0.027475366137324	0.219409956042992	-4.95941122308961
Q92793-1	CREBBP	0.0808815579741088	3.33677113076687	3.21838416982419	0.0175298814153215	0.181250317102861	-4.95975969603842
Q9UGV2	NDRG3	0.0892789199653549	3.31347689430383	2.785836400083	0.0308992478802352	0.227417990946656	-4.96672642765887
P51659-1	HSD17B4	-0.203078767986099	3.30059877779002	-3.22865010506819	0.0173011930107142	0.17999688380712	-4.9667383343613
O75376-1	NCOR1	0.100969852466783	3.34799825501391	3.24380181458021	0.0169695882691275	0.177928390302276	-4.96840509583686
P20338	RAB4A	-0.160229799304593	3.27985011168847	-2.60607603862996	0.0393870938000714	0.254477848081464	-4.96889453857769
Q8IY31-2	IFT20	0.328340748498801	3.33148922037238	2.21138534465249	0.0678739708004203	0.33228235668355	-4.9694153916723
Q8N511	TMEM199	-0.238615558744682	3.25939329578274	-2.0342223756296	0.0869414288845173	0.372725902256618	-4.97056890916564
Q5T9L3-2	WLS	-0.227235207838948	3.32751468782175	-1.93064352162225	0.100518106871052	0.397562760351858	-4.97339744741408
Q9P0R6	GSKIP	0.386847117978095	3.29573716169146	2.31951384416887	0.058399901741058	0.311234619929419	-4.97352913380036
P07197	NEFM	0.115853748292859	3.35388866269389	2.92251875569753	0.0257608814151609	0.213096628103063	-4.97419524748197
Q9NYV4-1	CDK12	0.0549982877433644	3.33679140348698	3.02431928976457	0.0225337549075172	0.200094489826675	-4.97463350880762
Q96S44	TP53RK	0.18890369585358	3.34685379971002	2.32362837658881	0.0580676615262831	0.310592269622613	-4.97852676113615
P00742	F10	-0.538632248347776	3.26809168909674	-1.99733697756072	0.0915510091815612	0.383293687655272	-4.98115000488082
Q96A33-1	CCDC47	-0.214267351731406	3.33024271392209	-2.56268158324446	0.0417866015943941	0.262636238914109	-4.98261478426257
O00422	SAP18	-0.0988610328496847	3.32131815905102	-3.03172553328809	0.0223166441512171	0.198831802943025	-4.9833080492663
Q93063-3	EXT2	-0.214709176568239	3.33112371584418	-1.74971830216298	0.129477473855427	0.446676645404556	-4.98381649775389
P52569-3	SLC7A2	-0.244938366866172	3.36272794081319	-1.80023236733387	0.120653790320046	0.433396812028151	-4.98527096047141
Q86VP1-2	TAX1BP1	0.110838742479435	3.36009517191735	2.86785870938568	0.0276962904401002	0.220386159083933	-4.98843902379527
P68104	EEF1A1	-0.0780606866444313	3.32555365184662	-3.90034312005404	0.00758545308439216	0.111697880583357	-4.98992993415756
Q9Y620-1	RAD54B	0.191245246952832	3.37723546699483	1.85209417396633	0.112208522074498	0.417665054388408	-4.99219856740811
Q9P2K6	KLHDC5; KLHL42	0.135673852177569	3.36298368103066	2.15531232224401	0.0733966709050444	0.345335460016712	-4.99244412491412
Q96JE9-1	MAP6	-0.115877848287503	3.32472602193333	-2.7949721844625	0.0305236157272588	0.227417990946656	-4.99514545292504
Q9NYJ7	DLL3	-0.116003462725866	3.31249474495168	-2.40077736536114	0.0521890418655974	0.296465098874964	-4.99581618293997
Q96FT9	IFT43	0.141323012161449	3.33458646164657	2.26349341536365	0.0631245993879959	0.320180078502089	-4.99792251168788
Q659A1-1	NARG2; ICE2	0.130782950148509	3.34875192764959	2.78521253354393	0.0309250788796917	0.227417990946656	-4.99832319664363
Q9BS16	CENPK	0.153894954495517	3.36002308153664	2.70841772959291	0.034287940610593	0.236916620163644	-5.00222777287599
Q9NRY2-1	INIP	0.305619227463789	3.15268329548244	2.12788342710433	0.0762636507336802	0.351136648599442	-5.00838145531949
Q9NTJ5	SACM1L	-0.284691610945526	3.30061510257892	-2.70853587697303	0.0342824769808339	0.236916620163644	-5.00962364346608
P67812-3	SEC11A	-0.38523245909695	3.27480145336466	-2.00170830314948	0.0909921103702841	0.381745234490234	-5.01014471881436
O43660-1	PLRG1	-0.100029535943524	3.32131581996119	-3.14174052836703	0.0193449514541587	0.18821821268286	-5.01308732272306
Q9NP80-1	PNPLA8	-0.213145805339	3.31338621623639	-2.11999924315824	0.077108700282151	0.353129386117848	-5.01391557209706
Q14151	SAFB2	-0.0631585141288209	3.32243380888758	-3.37196443344404	0.0144268624406742	0.161303899511473	-5.01401975417998
A6NDB9	PALM3	-0.223192909461631	3.38875078806832	-1.69033464817666	0.140654629020993	0.465899760385554	-5.0184725755952
O75420	GIGYF1	0.105747929286861	3.36059421885396	2.42895489489507	0.0501997552777206	0.291992751937531	-5.01997928120416
P53634-1	CTSC	-0.155125681478554	3.3032352349166	-2.95606669423639	0.0246454785808	0.20796562530398	-5.02072565142954
O00560-1	SDCBP	0.0945294252537395	3.34692767320187	2.6721485051438	0.0360098117853265	0.242722071390028	-5.02160646661953
A0FGR8-6	ESYT2	-0.152354012509746	3.31596656426815	-2.40336520356852	0.0520029564002772	0.295772332667111	-5.02183430947124
O14880	MGST3	-0.461024240514496	3.30909536272766	-1.87375521917395	0.108856316318683	0.41165392596987	-5.02335940562413
P17152	TMEM11	-0.24047788948514	3.29920970280961	-2.40634290188818	0.0517896941170256	0.295676338618052	-5.0234949901989
Q15048	LRRC14	-0.207736524164743	3.24653554406342	-2.01821777968681	0.0889120850966951	0.37765655144431	-5.02520481428179
Q96S38	RPS6KC1	0.159786750572936	3.36549371969926	2.18683452557939	0.0702375897749732	0.337583824599943	-5.02914258974733
Q9H1J1-1	UPF3A	0.147721253774239	3.35442914364416	2.35288888165466	0.0557608441408715	0.302764739564001	-5.02998761652434
Q13724-1	MOGS	-0.157341413403493	3.29208726226425	-2.57799004021022	0.0409229353083779	0.259725108818207	-5.04089132221382
P61158	ACTR3	-0.0900661222223023	3.30630784606909	-3.12537406543802	0.0197584424445687	0.18821821268286	-5.04154539568322
Q2KHR3-1	QSER1	0.0729970789139395	3.34143068520216	3.10026041334336	0.0204117062946085	0.189678824096917	-5.04212377562932
O15118	NPC1	-0.166030881810158	3.32684948156033	-2.28019644293153	0.0616758673959394	0.316604974301225	-5.04364103455726
Q9HCM9	TRIM39	0.15134331940407	3.38229502124539	2.07959164678366	0.0815917292382993	0.363473793814232	-5.04392591916489
Q9NR28-1	DIABLO	-0.173290897606982	3.36056850502013	-2.7516034691206	0.0323513501830434	0.232143076007146	-5.04466174384281
Q9NV96	TMEM30A	-0.125290418046747	3.32102938897359	-2.24640181868464	0.064643448644684	0.324914558079057	-5.04613590753244
Q96DT7	ZBTB10	0.209479080125634	3.40473650317102	2.8615844450903	0.0279282572977204	0.220920099049264	-5.04703678596728
Q86TP1-1	PRUNE; PRUNE1	0.0978446204782717	3.30650727310346	2.51811213084991	0.0444124020856242	0.271412340875191	-5.04902255581514
Q8NFZ4	NLGN2	-0.21281494588675	3.31881224310749	-1.89409670524394	0.105798710000113	0.406272359708624	-5.0515265119968
Q9NP90	RAB9B	-0.245626059271849	3.29389120733586	-1.65163227109841	0.148434265111469	0.476297689773392	-5.05247151527163
Q9BSW7	SYT17	-0.156685328232443	3.33098834467414	-2.01008738357585	0.0899303779807897	0.379069338404799	-5.05573731106316
Q14592	ZNF460	0.198747736664877	3.37287697699509	2.30798294657651	0.0593415469797467	0.312175553353281	-5.05577441702729
Q5TAP6	UTP14C	0.231688326006118	3.36431801823359	1.72932850769488	0.133214556546287	0.451699509723586	-5.05965325630865
Q02809-2	PLOD1	-0.332561888929956	3.29968441865312	-2.85236549547416	0.0282728844988809	0.221813028269909	-5.05997157945994
Q3SXM5	HSDL1	-0.280022060723205	3.28094343388245	-2.59551345636708	0.0399574140405763	0.256185693937209	-5.06037818346215
O95470	SGPL1	-0.178167544716741	3.31813784233312	-2.37148238394929	0.0543446926982186	0.30031037635283	-5.06046808086626
P17987	TCP1	-0.0330824298336163	3.31246374195459	-3.53969246637294	0.0117093899120014	0.146166811919314	-5.06066780429344
Q92466	DDB2	-0.0896055728655529	3.27627605144851	-2.64707096723846	0.0372539786880323	0.247620691676405	-5.06417368840864
Q9UKK6	NXT1	-0.14677819181258	3.34216755648854	-2.35334526204777	0.0557256285313444	0.302764739564001	-5.06678809339515
Q8N158	GPC2	-0.233427152215915	3.30916182852593	-2.13636742027887	0.0753648570554745	0.349200928265338	-5.07380005937302
Q9BWP8-10	COLEC11	-0.247587973804491	3.3425119893847	-1.78099848421752	0.123941982232316	0.439138699606831	-5.07612671359385
Q9H814	PHAX	0.135094722109724	3.33137613436381	2.81544472403626	0.0296994861176097	0.226223665175336	-5.07686882671996
Q9NW08	POLR3B	0.111446145631792	3.32050112596898	2.93983101187305	0.025178641815532	0.209822015129433	-5.07962213794888
P98175-1	RBM10	-0.0730153581258932	3.30218750510397	-3.08009324068888	0.0209532707498123	0.192611248878326	-5.08420939270087
O96005-1	CLPTM1	-0.255885814330154	3.3664843218461	-1.96164548009599	0.0962453251449098	0.390632793225242	-5.08540691468833
Q8WTW4	NPRL2	-0.210043555754031	3.3142972854999	-1.66098518960401	0.146517214943074	0.473740589640382	-5.08783675412569
Q86YA3-1	C4orf21; ZGRF1	0.148732094925709	3.37009930908143	1.96092016868269	0.0963431835263261	0.39073809299418	-5.08866138939676
O95985	TOP3B	-0.0717882181459994	3.30612248051359	-2.87112718465206	0.0275762715245488	0.219953594302949	-5.08962202454547
Q96AD5-1	PNPLA2	-0.207147250918237	3.26598686510686	-1.85448102335308	0.111834192654786	0.416862869104997	-5.09301711561263
P32004	L1CAM	-0.168384174012779	3.28872754652268	-2.24282908193937	0.064965676721734	0.32604496931507	-5.09323804979027
Q6P2H3-1	CEP85	0.11052819990165	3.35940948098654	2.53617762685076	0.0433277016963208	0.267553549645483	-5.09397039448444
P13682	ZNF35	-0.250403163502038	3.30886009399553	-1.8082495321168	0.119308570943249	0.430610091148786	-5.1003675266781
Q8IYW5	RNF168	0.117181867062279	3.39635318213336	2.36020224454382	0.0551993013136256	0.301689423704277	-5.10153473044325
Q86V59	PNMAL1; PNMA8A	0.165027847108799	3.38343984068812	2.26657223864178	0.0628549388780876	0.319520554236105	-5.10441552495946
O95239-1	KIF4A	0.118082175895087	3.31179276056399	3.22461676955318	0.01739065118203	0.180367434860063	-5.10585333302401
Q9BXK1	KLF16	0.129625099595234	3.39381949375286	2.3224247104081	0.0581646516717303	0.31076807512009	-5.10974059307576
Q9H497-1	TOR3A	-0.292188722443348	3.29849361782229	-1.81964589414958	0.117421656361949	0.428733023228914	-5.11513568922386
Q15532	SS18	0.631210731634829	3.10661161221674	2.35527853705159	0.0555767079647741	0.302751393941493	-5.11575662395168
Q9BVC4	MLST8	-0.125941394010814	3.3400606398419	-2.42955991320379	0.0501579219648827	0.291992751937531	-5.1168395310936
Q92597	NDRG1	0.169933076109679	3.3310002662145	1.80819947253045	0.119316924729235	0.430610091148786	-5.11897894765954
Q15262-4	PTPRK	-0.268273265740856	3.27171149419623	-1.76868865384764	0.126092275349781	0.441353506264344	-5.1229868932388
O76071	CIAO1	-0.0907201199575311	3.31078095422722	-2.53911793372003	0.0431538161038053	0.266964701501419	-5.12369342148636
P0CG08	GPR89A; GPR89B	-0.180727410922307	3.3026085118457	-2.03406077169246	0.0869611053119647	0.372725902256618	-5.12829270090975
Q15286	RAB35	-0.192593090307433	3.31081084623104	-2.60417246055728	0.0394892363410843	0.254646663604682	-5.12904890046608
Q96FZ2	C3orf37; HMCES	0.132227587743452	3.32693157052697	2.60610059139408	0.0393857781720608	0.254477848081464	-5.13282237455229
Q9BZE4	GTPBP4	0.137321440935483	3.34256390532371	2.9811572744855	0.0238453317419692	0.205290027141393	-5.13628310214841
Q8NFW8	CMAS	-0.0975480501006872	3.30388326819521	-2.98698246492488	0.0236636033954354	0.20492553329685	-5.13786023733917
O43313	ATMIN	0.176963047178424	3.38240585039945	1.78019118970152	0.124081896627626	0.439402065224681	-5.14036144110766
O14656	TOR1A	-0.298187911229234	3.31493989717606	-2.39986067897871	0.0522551253300179	0.296465098874964	-5.14251513671527
Q99618	CDCA3	0.106671553698471	3.3683089244235	2.47431376409086	0.0471625113522287	0.2813281079506	-5.14409198714458
P23246-1	SFPQ	-0.0761028635646555	3.31963495227051	-3.50623940635098	0.0122029058689473	0.148873394406964	-5.14506679895257
O75385	ULK1	0.141885820532009	3.33547799447058	2.20332628247915	0.0686407113361131	0.333981674620158	-5.14630513272317
O95243-2	MBD4	0.153193840409643	3.38899499674566	2.2370441888279	0.065490936284853	0.327095014811883	-5.14743721712255
Q9NS73	MBIP	0.137268363838045	3.40506888236365	2.36744631724241	0.0546488798868146	0.300395368314768	-5.15195665720138
Q9NXB0-1	MKS1	-0.227020158190359	3.28840087587019	-1.7407938803144	0.131100453652618	0.449525608737225	-5.15206989679302
P57768	SNX16	-0.115176655158146	3.334558735082	-2.28752551329493	0.0610510760679214	0.316069267424049	-5.15387802376826
P02786	TFRC	-0.0904511223914147	3.30836163804533	-3.12891486606588	0.0196681786337519	0.18821821268286	-5.15417480493878
Q8NDZ4	C3orf58	-0.118664803307471	3.34976916240735	-2.3728981269854	0.0542384104006587	0.30031037635283	-5.15440768186862
O96008	TOMM40	-0.435489395816582	3.23906402818741	-2.44652959415541	0.0489993169221837	0.288231276012845	-5.15475898400942
Q15911-1	ZFHX3	0.0793961219760904	3.33195523432965	3.0004215235563	0.023250025793357	0.202976417550358	-5.15761755712201
Q4LE39-1	ARID4B	0.0853689242678162	3.37921505269758	2.89594215263641	0.026683086053678	0.217680802993965	-5.15925042186951
Q86TV6-2	TTC7B	-0.139352863503102	3.30882588205476	-1.99540693606124	0.0917988735530489	0.38392787316194	-5.16038503008746
O43318	MAP3K7	0.189181935868468	3.32551672173446	2.79438843325471	0.0305474708637137	0.227417990946656	-5.16375318123834
Q92520	FAM3C; WNT16	-0.113845603773498	3.28452425670069	-2.67299107209627	0.0359687840271223	0.242708993210796	-5.16539483512213
Q9BV38	WDR18	-0.0786879237023086	3.31676073040399	-2.8526579253074	0.0282618829255795	0.221813028269909	-5.16833646885953
Q7Z5L2	R3HCC1L	0.128656050359021	3.34870885865514	2.28362023345234	0.0613831756182514	0.316069267424049	-5.16973047441354
Q8IV38	ANKMY2	0.115595421578374	3.32718291315031	2.52379994455619	0.0440678381135203	0.270379592821049	-5.17127044405263
O96018	APBA3	-0.189086663483473	3.28515653278479	-1.76600581239177	0.126565728192358	0.441891807654401	-5.17199635841115
Q8IWF2	FOXRED2	-0.249359909725339	3.30963638704378	-1.94810962858936	0.0980880772796507	0.393056290534486	-5.17380087695497
Q969V6	MKL1	-0.119731361894916	3.29032037971533	-2.20845874671261	0.0681513848685892	0.332767114525944	-5.17525022504078
Q6UXN9	WDR82	-0.12495514292827	3.33834902089969	-2.99888722314606	0.02329684553675	0.202976417550358	-5.17706813150627
O60291-2	MGRN1	-0.165918815881955	3.30940165795258	-2.35286174773593	0.0557629386002952	0.302764739564001	-5.17948212042063
O95996-1	APC2	0.138569669009537	3.379544729446	2.31578279877191	0.0587028814431822	0.311655551243519	-5.18079592586023
Q9BWU0	SLC4A1AP	0.0947757995816418	3.3384198084955	2.83104474460819	0.029087510028208	0.225726189532549	-5.18144991601449
Q9Y3D0	FAM96B	0.549462615185397	3.26194186069094	2.30829804481198	0.059315607047303	0.312175553353281	-5.18194212589373
Q15652	JMJD1C	0.115534631014804	3.34753358494548	2.81824478185147	0.0295886341969153	0.226223665175336	-5.1852809721242
Q7Z7A3	CTU1	-0.152869035257	3.3111058823037	-2.21064221090887	0.0679443027845469	0.33228235668355	-5.18602793818151
P17096-1	HMGA1	-0.163186466289553	3.27255831759034	-2.51728330897126	0.0444628478921825	0.271412340875191	-5.18604858489099
O75530	EED	-0.0769794531246234	3.34210357690038	-2.87624482586991	0.0273894717125119	0.219210048610581	-5.18800196789839
O00592	PODXL	-0.144466957080867	3.2830306412056	-2.07826506751312	0.0817433170090398	0.363665487357614	-5.18801513488264
P26378-1	ELAVL4	-0.0984812958830105	3.32302810665075	-3.04813324011717	0.0218436782222418	0.197408820687467	-5.18839316445427
Q9H467	CUEDC2	0.130566747395876	3.37552699072804	2.61943899064805	0.0386778916164086	0.251594052262075	-5.18847917508289
Q92854-1	SEMA4D	-0.169213450280746	3.35808401442292	-1.94910313777841	0.0979516300900882	0.393056290534486	-5.18948199700631
Q03188	CENPC; CENPC1	0.251924377591971	3.38855923023306	1.38336396463972	0.214623445229411	0.56170979806135	-5.18987254919384
Q9H2H9	SLC38A1	-0.207926728252708	3.34062071890448	-2.16060181338545	0.072856584733453	0.343371245272833	-5.19041014092113
P51798-1	CLCN7	-0.120124453214955	3.28920995440163	-2.08526142702046	0.0809470543572051	0.36301557174918	-5.19149893600718
O96000	NDUFB10	-0.246822480506253	3.35023151580203	-2.42674862376347	0.0503526149733287	0.292374576198156	-5.19233937646662
Q9NZJ7	MTCH1	-0.436680595102774	3.21197214001637	-1.99135535252292	0.0923213926705511	0.38480086769453	-5.19368972498463
P07942	LAMB1	-0.35184390177337	3.32227584556793	-2.83654249871369	0.0288750703783636	0.224695669610959	-5.1946527581335
Q9Y467	SALL2	0.134469896551147	3.39979512754995	2.33298503919855	0.0573194136771868	0.308436186579309	-5.19563320098924
Q92791	LEPREL4; P3H4	-0.375674787073807	3.31858090351771	-2.33247523220279	0.0573599236534058	0.308436186579309	-5.19752175287925
Q9Y3I1	FBXO7	0.20587300888927	3.34682540659647	2.27856341652525	0.0618159790384061	0.316803645429141	-5.19857700718515
P18124	RPL7	0.173803366728621	3.27610213449229	3.08214147420765	0.0208975635230143	0.192611248878326	-5.20006441378624
Q9HC77	CENPJ	0.153142390954792	3.37448356411229	2.54683355515658	0.0427010148542704	0.265829812009902	-5.20033317316103
P58317	ZNF121	0.256039607373181	3.41333257543615	2.30190059664152	0.0598445768276303	0.312523186369633	-5.20190052380065
Q9NX31	C20orf111; OSER1	-0.157207098505105	3.26875846762356	-2.16701111780822	0.0722076042859813	0.342385667881157	-5.20304120974865
P38606	ATP6V1A	-0.111529001302775	3.32917882444081	-2.89436268878245	0.0267390001289602	0.217680802993965	-5.20423145353491
Q99435-3	NELL2	-0.139952599937261	3.32369224100031	-1.91511823816461	0.102728493376503	0.401428467799068	-5.2059168562567
Q9UQF2	MAPK8IP1	0.237052937140074	3.3738795312403	1.62432736594439	0.154169132556082	0.484717591799975	-5.20704046680054
P52848-1	NDST1	-0.143367594450486	3.3122527909736	-1.94117631726684	0.099045593151709	0.394647470085989	-5.21103661780421
Q8IZT6-1	ASPM	0.224633555738135	3.36316139131777	2.19467834878586	0.0694733794115628	0.336810160678344	-5.21396266075782
O00754	MAN2B1	-0.135862054517947	3.3230664785366	-2.67619026764906	0.0358134551201371	0.242272973398717	-5.21559516593704
Q96D46	NMD3	-0.0874525652184687	3.29964126995708	-2.87547140548897	0.0274176150351742	0.219210048610581	-5.22065170990433
O14967	CLGN	-0.213976363442352	3.28215446895106	-1.90145474003809	0.104713819941397	0.40412498603547	-5.22176103028325
Q86XR7-2	TMED7-TICAM2; TICAM2	-0.156586001533847	3.29629903958738	-2.35523920598569	0.0555797335146323	0.302751393941493	-5.22238238541723
Q06546	GABPA	0.0823163900475247	3.31499279714944	2.70815985811738	0.0342998688893634	0.236916620163644	-5.22435854955678
P14618	PKM	-0.0929207678427791	3.33986217048329	-2.87694217536191	0.0273641230749038	0.219210048610581	-5.22633901024275
Q6IEG0-1	SNRNP48	0.115651506868843	3.37342997951309	2.30588205559056	0.0595148001385231	0.312254628761241	-5.22664482681358
Q8ND76	CCNY	-0.155741557684226	3.32766848879427	-2.10966542792977	0.0782307774572965	0.356319652592717	-5.2268381359135
O00165-2	HAX1	-0.165848109443375	3.3299420339889	-2.0342232916444	0.0869413173660238	0.372725902256618	-5.22973622612088
Q9NPB6-1	PARD6A	-0.145654263749316	3.29853913588889	-1.86033830787809	0.110920816301972	0.415410547357859	-5.22989741462601
Q86T03-2	TMEM55B	-0.153341809352146	3.29605039836689	-2.13444092793428	0.0755679964607373	0.349658547159489	-5.23164172230264
P18031	PTPN1	-0.148213970849373	3.30540851819461	-2.62362179775199	0.038458690679776	0.250898955749269	-5.23178112169556
P60033	CD81	-0.217714121153657	3.37175514422935	-2.28080432006591	0.0616237962096813	0.316604974301225	-5.2325295389079
Q9NXC5-1	MIOS	-0.186976081297271	3.33695902527183	-2.73775446249948	0.0329593576992505	0.232990780328626	-5.23433094264445
Q15437	SEC23B	0.145671241416339	3.347481185526	2.72365568314968	0.0335908706952722	0.234853999851017	-5.23488207849019
Q8IXB1-1	DNAJC10	-0.33019005419762	3.22632352915623	-2.28586586427952	0.0611919825663851	0.316069267424049	-5.2352154027772
Q9HCN4-5	GPN1	-0.127582180751201	3.28143885887298	-2.17517695378912	0.0713893293197087	0.340653771881293	-5.23688804625399
P52434	POLR2H	-0.11242774325135	3.33959239541778	-2.22923753771345	0.0662067136191754	0.328415543772616	-5.23807057477535
P07737	PFN1	-0.041597323582464	3.32363051119187	-3.46951160963526	0.012771231716295	0.152254897685367	-5.23969678881529
P63208	SKP1	0.174714994012921	3.33705197721279	2.7702064985784	0.0315534078255476	0.229804282578799	-5.2439909986508
Q6ZN04-1	MEX3B	0.102535614463538	3.36534966854079	2.50048439962679	0.0454984085474022	0.275623270585529	-5.24497788744647
O95989	NUDT3	-0.08990723907064	3.28963210813286	-2.52448980596005	0.0440262386107125	0.270371951138198	-5.24934751615104
Q9UKI2	CDC42EP3	0.204997603750715	3.39598201719197	1.93937674109982	0.0992956443426224	0.394974622740201	-5.25049584710243
O00461	GOLIM4	-0.122941966601864	3.31364979382397	-2.69347238140764	0.0349866098938351	0.239105707775653	-5.2511023356179
O14771	ZNF213	0.210473840948378	3.36475182946593	1.52391727438333	0.17711859715601	0.51595417432403	-5.25135577459054
Q02224	CENPE	0.0937409031415677	3.40854256424015	2.85138723000665	0.0283097214762676	0.221842261860811	-5.25161275363265
Q9NSG2-1	C1orf112	0.175297029853675	3.3152279964773	2.12747953695558	0.0763067105016101	0.351136648599442	-5.25295558861034
Q96DF8	DGCR14; ESS2	0.129735508305915	3.38039720687909	2.17500974667809	0.0714059890502681	0.340653771881293	-5.25323046417408
Q9C0E8-4	KIAA1715; LNPK	-0.159430163597396	3.34985144936685	-2.35593131926471	0.055526517586055	0.302751393941493	-5.25447446085383
Q6P158-1	DHX57	0.0953313206102281	3.31352033739333	2.78867659542587	0.0307819418217005	0.227417990946656	-5.25461725324199
Q96MZ0-4	GDAP1L1	-0.163341755436864	3.30428429430449	-2.21847956221861	0.067206313240196	0.331590705618579	-5.25942584424134
Q96AE7	TTC17	-0.253937713396864	3.3302427540808	-1.43733700262799	0.199433996657279	0.54428015381009	-5.26066814305504
Q14680	MELK	0.123256030384274	3.3316667241601	2.67293225771136	0.0359716463072121	0.242708993210796	-5.26096126118431
P08865	RPSA	-0.0697890408322632	3.31791919255171	-3.12930589497675	0.0196582378280851	0.18821821268286	-5.26274870144925
Q96A47	ISL2	0.208461428918208	3.3571712657494	1.73896307736731	0.13143583635145	0.450445065756888	-5.26367993354549
P11234-2	RALB	-0.21216038598935	3.4146690186569	-2.06418806829237	0.0833695978571323	0.36661824144077	-5.26542615884992
P37275-2	ZEB1	0.0830357776886819	3.34589493644675	2.6821169995153	0.0355275789266629	0.241031226592036	-5.26591933373373
Q8TAP8	PPP1R35	0.151483644300368	3.34004486566149	1.77028319833883	0.125811698375686	0.441328994302146	-5.26663362481649
Q49MG5	MAP9	-0.201259448548844	3.32641680379998	-1.96486265345304	0.0958124657079122	0.390239222032226	-5.26731017757801
Q7Z7F0-1	KIAA0907	0.116999106162545	3.37147359510342	2.62024835745059	0.0386353734830626	0.251594052262075	-5.26792475465159
Q5T6C5	ATXN7L2	0.131735646560467	3.35101798158379	1.94337589369653	0.098740816139141	0.39402231574285	-5.26862673105714
O43681	ASNA1	-0.0650392928541716	3.31920187832665	-2.6261444493494	0.0383271273875008	0.250760051835261	-5.26972160190021
Q9BZR9	TRIM8	0.228416010446281	3.41446406171773	1.2724473184716	0.249153037835107	0.608354720661522	-5.2717885201893
Q9Y2W1	THRAP3	-0.0718127203874956	3.31451961637606	-3.20169170217069	0.0179087934983302	0.182748585742702	-5.27187866502296
Q96G97-4	BSCL2	-0.197534839280936	3.31227209308571	-2.0984791936348	0.0794641606873722	0.358766763211182	-5.27203578334756
O43290	SART1	0.0897146251183878	3.33743354093939	3.06294981430186	0.0214258935004539	0.195045497898154	-5.27416657185939
P78345	RPP38	0.149271148618422	3.3290378563075	1.9073526040705	0.103852211802509	0.403103093395641	-5.27476432100286
Q6ZRY4	RBPMS2	-0.126166333062997	3.3052720095425	-1.95868255648742	0.0966457084810896	0.391018264989916	-5.27646461160839
O60488-1	ACSL4	0.138283732917071	3.33788295608796	2.72967883453518	0.0333195168402492	0.234311567432641	-5.27761527425762
Q8NCA5	FAM98A	-0.155263902886008	3.33329840205108	-2.78670802250751	0.0308631972626095	0.227417990946656	-5.28041728084472
Q6ZNB6-1	NFXL1	-0.220339987323308	3.29457123767357	-2.07186353735407	0.0824788437932162	0.364998846376848	-5.28308490782785
P38919	EIF4A3	-0.0976673081735093	3.32200935336722	-3.10428046377006	0.0203055784897172	0.189110167948183	-5.2835229853039
Q49AR2-1	C5orf22	0.10553954938927	3.34124824596926	2.36566096460043	0.0547840022375276	0.300616556094542	-5.28368393821196
Q9NVF7-1	FBXO28	0.171450880372931	3.37706814128693	2.07138020882287	0.0825346493583254	0.365004719934508	-5.28454134665577
Q969E2-1	SCAMP4	-0.124411214225015	3.31838576696158	-2.01991489098428	0.0887010004777397	0.377570967726084	-5.28831598498823
Q9C0J8	WDR33	-0.122021122487944	3.29000555994698	-2.77488303535783	0.0313561417471394	0.22934053691742	-5.28926140014196
P62070-4	RRAS2	-0.253755321343619	3.33088817558095	-2.24649600470112	0.0646349762598091	0.324914558079057	-5.29086232137169
Q9UJK0	TSR3	0.144304077906951	3.39684029001277	1.87747025839842	0.108291428587744	0.411212332650749	-5.29245964439422
Q9UL42	PNMA2	0.154898823997185	3.35887972695347	2.40421573793879	0.0519419478437982	0.295676338618052	-5.2932866097485
P16278	GLB1	-0.0991030457799689	3.31644478470921	-2.55203976292352	0.0423983154029236	0.26523689374378	-5.295426641855
Q9H6X2	ANTXR1	-0.134306133673774	3.30855273325436	-1.91208604114743	0.103165816967572	0.402141454682805	-5.2958025637224
Q6IQ49-1	SDE2	0.0641286156327777	3.34701109865265	2.63818059542298	0.0377059460349313	0.248651415781535	-5.29821557118479
Q13425-1	SNTB2	-0.109417385467413	3.31902629335959	-2.41178094577266	0.0514025768618512	0.29511333759589	-5.29872333148895
Q8NC96	NECAP1	-0.139124892859445	3.18788251231562	-1.90882167843806	0.10363869667809	0.402772197066823	-5.30185812030335
Q9UPS8-3	ANKRD26	-0.108407711146598	3.35486986220714	-2.32883408001953	0.0576501206657578	0.309499846522898	-5.30225588423288
Q9UNS1	TIMELESS	0.0996817659649569	3.33481355310345	2.7844664357641	0.030956001155724	0.227417990946656	-5.3023084247516
Q9HCE3	ZNF532	-0.099987067777111	3.31973891614194	-2.91728044945516	0.0259398991257512	0.21377284642378	-5.30457900092432
Q9NZC3	GDE1	-0.157969824631038	3.3221663567841	-1.96154469771029	0.0962589166589365	0.390632793225242	-5.30672748625364
Q6DKI1	RPL7L1	0.245706152119321	3.3603022781485	2.36678542676705	0.0546988581110474	0.300395368314768	-5.30913500082734
Q9UKB3-1	DNAJC12	0.115791986687858	3.30185182726713	2.07496232741221	0.082121962575309	0.364998846376848	-5.31147757970746
Q7Z3K3-1	POGZ	-0.0803641481392161	3.30962639376317	-2.78698884184515	0.0308515920578535	0.227417990946656	-5.31342330091825
Q96PY6-3	NEK1	0.0743775551305665	3.34465053007585	2.66914600162592	0.036156419923413	0.243465340187806	-5.31366407539437
Q9NPF5	DMAP1	0.0894284291367493	3.33916568380612	2.65951262549121	0.0366311022641858	0.245183201968077	-5.31447046761569
Q9NWZ3-1	IRAK4	0.126952005659193	3.35862018126745	2.01646736460827	0.0891303301090823	0.377957728943577	-5.31858076809886
Q13868	EXOSC2	-0.112213020666447	3.31483666075079	-2.47449598229804	0.0471507062281006	0.2813281079506	-5.31898305371414
Q8WY36	BBX	0.210251798397764	3.34631791616037	2.29902842132718	0.060083648815609	0.312833559600058	-5.31936564688624
Q14669-2	TRIP12	0.0843781855572252	3.33636205219951	2.79768207112358	0.0304131363201699	0.227417990946656	-5.32019628337877
P26885	FKBP2	-0.332222429704142	3.26523921775449	-2.32113829891135	0.0582684952335693	0.311074835111486	-5.32050343282271
Q9NP50-1	FAM60A	0.122948267830501	3.37641511530799	2.30804920301213	0.0593360915538645	0.312175553353281	-5.32140938359055
Q8WV99	ZFAND2B	-0.17344005497998	3.33151666374543	-1.96017523271571	0.0964437933585546	0.390909507260929	-5.32414290676415
Q8NG11-1	TSPAN14	-0.143840613523929	3.38712768733483	-1.86978425819943	0.109463345375591	0.412803423057564	-5.32579253124599
O43709-1	WBSCR22; BUD23	0.15119052057133	3.33371280717692	2.08821530617318	0.0806132390223648	0.362489061375735	-5.32649520927879
P62820	RAB1A	-0.145808962869419	3.31197866054369	-2.78775890925396	0.0308197920178646	0.227417990946656	-5.32863649687189
P79522	PRR3	0.129390766166001	3.40276938762123	2.22947231399033	0.0661850703367051	0.328415543772616	-5.33009011627601
Q96B45	C10orf32; BORCS7	0.347232068363997	3.28279066717097	2.1084868623611	0.078359801628007	0.356522476394766	-5.33041282735213
Q6ZRI8	ARHGAP36	-0.230548551426072	3.29970381166532	-1.77475734114662	0.125027676068807	0.440548859734676	-5.33068135544267
Q8WUY3-3	PRUNE2	0.0659370846741569	3.31675054277597	2.91173753392176	0.0261307860120268	0.214554247892867	-5.33108432724136
Q9BZL4	PPP1R12C	-0.15546791088805	3.28181017930154	-1.92007850898486	0.102017067057608	0.399949882554695	-5.33336728546716
Q05D32	CTDSPL2	0.131324692281294	3.38646681801958	2.57745499218959	0.0409528011664949	0.259725108818207	-5.33388835752161
Q6N021	TET2	0.13275932494048	3.34779541610321	2.42230330246817	0.0506620862533363	0.293375953238853	-5.33416969645065
O75381-1	PEX14	-0.213110594937572	3.27822825864731	-2.04525715187278	0.0856084513749663	0.3699266948422	-5.33420929345795
Q96A26	FAM162A	-0.24641250308879	3.2427804169659	-1.30357037119976	0.238997609321645	0.594950359116817	-5.336126037915
P02462	COL4A1	-0.171295406069326	3.30942366042367	-1.65609695375213	0.147516168291528	0.474057199823939	-5.3389280965724
O00559-2	EBAG9	-0.165650024051207	3.30447351058524	-1.72786212581162	0.13348731779891	0.451699509723586	-5.33994651487226
P51151	RAB9A	-0.155458838702517	3.32698335685859	-1.90269922337387	0.104531425941628	0.40412498603547	-5.34108330627563
O00487	PSMD14	-0.0963558697094284	3.2950665378301	-2.77228818585366	0.0314654345952849	0.229649686044019	-5.34157600462051
Q8NFJ9-2	DPP3; BBS1	-0.202434356063595	3.30879881331367	-1.08226694384529	0.319687447117671	0.680840637093322	-5.3419575873544
Q9UL33-1	TRAPPC2L	-0.123845092033198	3.33999858799417	-2.05884542980845	0.0839953704973565	0.36708323889444	-5.34486015530502
P06493	CDK1	0.0615556031542481	3.333373589958	3.03340781154958	0.022267644961093	0.198662206629576	-5.34612399411574
O15417-1	TNRC18	0.170255385705397	3.30877465982107	1.53110199360637	0.175375178678085	0.513106417966448	-5.34624241150652
P63096-1	GNAI1	-0.137465588857879	3.33733069683583	-2.15250181168713	0.0736853035596738	0.346207246739	-5.34747570778315
Q6UXD5-5	SEZ6L2	-0.123042347476521	3.29192699476155	-2.05643960246593	0.0842787115554395	0.367382802486301	-5.34934410139694
P21926	CD9	-0.311335620740104	3.34539058973559	-2.41727104563612	0.0510148203131201	0.293947011514717	-5.34997897884115
O60925	PFDN1	0.506913556201904	3.23485576110343	2.44246344675604	0.0492743559180815	0.289567168662329	-5.35075965610747
Q2NL82	TSR1	0.105801569054091	3.32094943329656	2.71717025671434	0.0338856868798473	0.235565685246697	-5.35472840561239
P51606-1	RENBP	-0.210690149466142	3.32594130628533	-1.89535226512955	0.105612799606708	0.405970027174379	-5.35484287542408
Q9Y487	ATP6V0A2	-0.153607880613187	3.33490825375865	-2.00826880524761	0.0901597493662564	0.379441156252461	-5.35535010878884
Q96PQ7-3	KLHL5	0.162953737131086	3.35456478163097	1.61545501757277	0.156077662381204	0.48706117277786	-5.35658305405433
O14994	SYN3	-0.180292733119224	3.28809129943117	-1.61112656602885	0.157016894499899	0.488138201595917	-5.3585895827891
Q9UG01	IFT172	0.104032804334372	3.33732314818862	2.37055477852143	0.0544144472973636	0.30031037635283	-5.36297464865433
Q7Z4H8	KDELC2	-0.337044604946946	3.27769756804355	-2.30875437983591	0.0592780608707117	0.312175553353281	-5.36635068075575
Q9HAJ7	SAP30L	0.150563554647215	3.37532912890719	1.92108923676124	0.101872706633759	0.399617760214395	-5.36839769013275
P26992	CNTFR	-0.204980774451846	3.33342973695746	-1.82801644942426	0.116054446511965	0.425131105319939	-5.37012981684467
P61163	ACTR1A	-0.108840089381445	3.32736348186682	-2.84731823712736	0.0284634945639065	0.222526736964029	-5.37012985776135
Q9Y3C1	NOP16	0.0803071741612938	3.3578594785652	2.52096074118286	0.0442394819100628	0.270929809281895	-5.3704907261377
A4D2B0	MBLAC1	-0.219510523499192	3.3257728373056	-1.40405664063314	0.208679698954497	0.555780779833095	-5.37197440112062
Q6UW63	KDELC1	-0.3408481508674	3.30183929649046	-2.50534873025486	0.045195964449955	0.274287103093024	-5.37217117627971
Q9P215	POGK	0.0863664335435094	3.36938147028811	2.24885560728652	0.0644230944709821	0.324781589883808	-5.37707861764764
P11802	CDK4	0.152025285696034	3.35787879989372	2.69725224879391	0.0348084874601186	0.238951706949584	-5.37709257371605
Q9H490	PIGU	-0.208294441768328	3.35088714612163	-1.61300080927309	0.156609543961773	0.487927190992923	-5.37822126040884
P61266	STX1B	-0.119916761642018	3.3307853025843	-1.9867417921467	0.0929200288778941	0.386445806009864	-5.38124902684952
P56159-2	GFRA1	-0.212262938632908	3.29112598454915	-2.09997873355515	0.0792976814456453	0.358498289936453	-5.38206876599044
Q9UG56-3	PISD	-0.193725579963647	3.30174095006056	-1.77393546623902	0.125171337962909	0.440548859734676	-5.38321966270392
Q9H7X3	ZNF696	0.262463005006292	3.37543630224365	1.85875952572492	0.111166280905484	0.416097252551251	-5.38737856612148
P07099	EPHX1	-0.209503656948157	3.32393394592901	-1.61476446231278	0.156227147116527	0.487300691657695	-5.38789036223557
Q9UER7-1	DAXX	0.0885125915616983	3.3442475208282	2.42666745591648	0.0503582479003989	0.292374576198156	-5.38894639806536
Q9H672-1	ASB7	0.131457935172146	3.33377197053188	1.98281917957997	0.0934320767419515	0.386894260921554	-5.39032500208251
P54802	NAGLU	-0.154374776553657	3.31747541542148	-2.21722144637296	0.0673242236295113	0.331748186866403	-5.39164087744292
O15031	PLXNB2	-0.173346683831188	3.32911378336799	-2.758448538602	0.0320552654551913	0.231433489816575	-5.39259342179908
Q96B01	RAD51AP1	0.156015620320662	3.35305916736771	2.48996826415431	0.0461595555021987	0.278020194925054	-5.39486979641224
Q9HAN9	NMNAT1	-0.123262782118435	3.32501782477067	-2.29892760563114	0.060092058388847	0.312833559600058	-5.39815150881925
Q14344	GNA13	-0.229196241079293	3.25791625973379	-2.360413573245	0.0551831626033454	0.301689423704277	-5.39932576441172
Q9UL25	RAB21	-0.114566131738916	3.31322411331119	-2.4641082623955	0.0478286584261046	0.283226909027261	-5.39963212034343
P42702-1	LIFR	-0.169637663593296	3.28088281951169	-1.65999929395964	0.146718167687133	0.473740589640382	-5.40531245709599
P25205-2	MCM3	0.106487834180479	3.32329614157618	3.14899455544481	0.0191646973243371	0.18821821268286	-5.40540049372378
Q9HCU4	CELSR2	-0.206203862362904	3.31535749074265	-1.91244636062665	0.10311375241471	0.402141454682805	-5.40740213356958
O94955	RHOBTB3	0.17808332314878	3.35298025781329	1.89988541795893	0.104944274037988	0.40412498603547	-5.40951398945069
Q13127-1	REST	0.227680133565268	3.4155364841632	1.2881337410517	0.243987979712874	0.60277366786463	-5.41212106201511
Q92879-4	CELF1	-0.0853285643095854	3.31015912369971	-2.82963479251288	0.0291422617829336	0.225726189532549	-5.4140846982997
Q9NYU2-1	UGGT1	-0.360590027395828	3.28555010010331	-2.92247332773467	0.0257624281736539	0.213096628103063	-5.41424959222185
Q96AA8-3	JAKMIP2	0.146065792445587	3.39963357397006	2.2094772237961	0.0680547108063503	0.332579549527751	-5.41441686837916
Q9Y421-1	FAM32A	0.107553210171729	3.34378575737389	2.14845321838474	0.0741031254246108	0.346707204138832	-5.41769707691688
Q9HA47-4	UCK1	0.165021226030441	3.33777082279971	2.21657063259115	0.0673853012615959	0.331748186866403	-5.41881984365437
Q8TCN5	ZNF507	0.154201510045508	3.39885211618974	2.04030873446366	0.0862036364683885	0.371424028513314	-5.41882661679611
Q13309-1	SKP2	0.160823371272733	3.32665828933902	2.41842209534871	0.0509339120548345	0.293947011514717	-5.4203739508339
Q9Y5X3	SNX5	-0.0795101714119855	3.30609306393432	-2.74012747470246	0.032854316600349	0.232935366372844	-5.42044526965253
Q9Y4E8	USP15	-0.0669279315723704	3.29970274873057	-2.82660238638992	0.0292603919006544	0.22611836878245	-5.42382269045106
Q9Y625	GPC6	-0.248755785023378	3.32793322933348	-1.9578314958997	0.0967610213000408	0.391228141878279	-5.42563225033149
Q8NBL1	POGLUT1	-0.342596994441255	3.28078141606821	-2.38532059231824	0.053315073089646	0.298743027859019	-5.42774265777138
Q86UD0	SAPCD2	-0.0951829392120691	3.31740371813284	-2.12955265059931	0.0760859532195614	0.350843693441886	-5.42877894316378
Q7Z5K2-2	WAPAL; WAPL	0.0827944069295979	3.34532370903278	2.76148143632791	0.0319250033291207	0.231344513614768	-5.42880364504148
O95071	UBR5	0.0772217190709089	3.32428597857089	2.94509897737966	0.0250042972151752	0.209337181435876	-5.43074553057674
Q9UK97	FBXO9	0.126407036124235	3.33173381821793	1.88353492479384	0.107375505918525	0.410221097115936	-5.43089530337
O43502	RAD51C	0.117369043938049	3.3619553043305	2.18724777395682	0.0701971132772536	0.337583824599943	-5.43136368622109
Q9BV57	ADI1	-0.120167963723667	3.29108603219668	-2.35423217963203	0.0556572576102584	0.302764739564001	-5.43233903875773
P07199	CENPB	-0.0977336807092415	3.32623363517149	-2.44774029297459	0.0489177349218684	0.288004238995183	-5.43276644534853
P49257	LMAN1	-0.126651768488272	3.28306459937608	-2.31765280519681	0.0585508241799748	0.311555865821413	-5.4335582902309
O14832	PHYH	-0.17830761039809	3.31437835110363	-2.25090909148034	0.0642392838009515	0.324098796284921	-5.43364224363901
Q13098-7	GPS1	-0.0686653488195115	3.30386082332734	-2.72310782059408	0.0336156695309143	0.234853999851017	-5.43537740121431
P25686-3	DNAJB2	0.139949562033062	3.39173375748643	1.77881347547553	0.12432102866268	0.439783997909165	-5.43598198574343
Q9NZ08-2	ERAP1	-0.200988895191048	3.32342023688058	-2.13711283627317	0.0752864061357496	0.349078838138078	-5.4361915544413
Q7Z7L8	C11orf96	-0.187365563366923	3.3321117218106	-1.74865012871303	0.129670695699725	0.446676645404556	-5.43630239453976
Q7Z7C8-2	TAF8	0.141404694062904	3.35089814429956	1.84132476488207	0.113912927289508	0.42096889842234	-5.43741511367991
O94805	ACTL6B	-0.151586569626972	3.30116363353883	-1.58697446075097	0.162356961511887	0.494226098196112	-5.43749187416667
Q7L4P6	BEND5	0.136696517092609	3.37066484118444	2.41779852891156	0.050977726400808	0.293947011514717	-5.44085200273928
Q99575	POP1	0.151562810418337	3.32280910132777	2.57476563427663	0.0411032677846455	0.260222222721687	-5.44133987920544
Q5VYS8-1	ZCCHC6	0.129961437329364	3.32536355846145	2.08369735379691	0.0811243770042034	0.363186905367154	-5.44301958871277
Q9HBM0-1	VEZT	-0.20736146937194	3.30308342966488	-1.64733591580589	0.149322911810333	0.477223199298795	-5.44807396582886
Q13162	PRDX4	-0.377778643979431	3.2741600462809	-2.62474656087609	0.0383999721168624	0.250760051835261	-5.44815656760787
P57087-1	JAM2	-0.17786521550972	3.33094714342032	-2.19043906463312	0.0698853402435249	0.337149370893749	-5.44838251579113
P15121	AKR1B1	-0.113956001094211	3.3135195981253	-2.88630771056532	0.0270261180087045	0.218030189279858	-5.44903670343637
Q58WW2-3	DCAF6	0.172319210462576	3.35503344138199	1.60258655022882	0.158885771536608	0.491376608357648	-5.44983066810739
Q96PM5-1	RCHY1	-0.125511089310937	3.25842542399815	-1.92349065944722	0.101530531731393	0.398578398660583	-5.45018309056317
Q9NRM2	ZNF277	0.125567996831923	3.39010685123251	1.81114460151946	0.118826426433466	0.430566516005477	-5.45136982254134
Q9HCU0	CD248	-0.216669552384841	3.37859739506567	-1.34852418811554	0.224977389562585	0.576423904424213	-5.4526312674323
Q53H96	PYCRL; PYCR3	-0.13613701649897	3.30745072075789	-2.16129796890202	0.0727858067947028	0.343371245272833	-5.45553632718634
Q8IZD2-1	KMT2E; MLL5	0.17108287333039	3.38948590142092	2.01204256660005	0.0896844326504467	0.378992210091445	-5.45606597940255
Q9H0Q3-1	FXYD6	-0.186642750716378	3.37024124340232	-1.83309231708928	0.11523302008446	0.424364708151767	-5.45817017620908
O94927	HAUS5	-0.0818992382006412	3.32360095415111	-2.38219990884179	0.0535454751718135	0.298743027859019	-5.46154693347829
Q86X53	ERICH1	0.151837202609665	3.33020297359799	1.90250540206245	0.104559812006662	0.40412498603547	-5.46168467858445
Q8WUH1	CHURC1	-0.136858758800164	3.25349048684202	-1.95156011950241	0.0976150062118711	0.392333858200082	-5.46168583692376
O43583	DENR	0.165949073580483	3.35354435151964	1.97023108419592	0.0950945009959118	0.389445694787658	-5.46413251681027
P41162	ETV3	0.148798999189228	3.39530182408065	1.64387631560427	0.150042183951277	0.478201018099619	-5.46610050973178
Q15699	ALX1	-0.281552176748849	3.28865203459369	-1.03575959081203	0.339269502825713	0.69789276788638	-5.46635085036086
Q12834	CDC20	0.109616449505043	3.43667552626487	1.87859143139563	0.108121520668561	0.411212332650749	-5.46865996181662
Q9UMR5-3	PPT2	-0.180542692992642	3.34209017544669	-1.46520660326177	0.191981992173675	0.533947425306609	-5.46929667091724
Q08431	MFGE8	-0.217249172263523	3.33235496778276	-2.30741170715452	0.059388603292451	0.312175553353281	-5.4696790401371
Q13443	ADAM9	-0.114613977720254	3.3218071762625	-2.12821037396364	0.0762288122379022	0.351136648599442	-5.47022791936067
P06280	GLA	-0.178109754450384	3.30132791344918	-2.38114549762027	0.0536235575086674	0.298743027859019	-5.47042765505128
Q13356	PPIL2	0.0721351371427827	3.35780474829582	2.79406510409135	0.0305606923736628	0.227417990946656	-5.472115444966
P42696	RBM34	0.184014297643878	3.3703025802439	2.19203079610654	0.0697303674576898	0.337149370893749	-5.47218007834407
Q8NBI6	XXYLT1	-0.179750113679199	3.3248831388189	-1.71965545835216	0.1350238598473	0.453829895702266	-5.4748497674395
P10586-1	PTPRF	-0.21498907538292	3.29843579606753	-2.48549571512365	0.0464437969730376	0.278579623741586	-5.47594920835272
Q96DZ1	ERLEC1	-0.365606757205635	3.28076461322679	-2.25880024501427	0.0635379542120252	0.321528922372031	-5.47969244405178
Q13610	PWP1	-0.0885580377931079	3.31358779810674	-2.53384343922844	0.0434662681115113	0.268162059251497	-5.48148835001264
Q8NBQ5	HSD17B11	-0.238789052582063	3.3070323588105	-2.36468110262148	0.0548583097966341	0.300777966970089	-5.48193770256133
Q149N8	SHPRH	0.0885150440848238	3.30144428568806	2.65459261946235	0.0368760842427465	0.246373217590371	-5.48216409215221
Q96HJ3-1	CCDC34	0.131870355163151	3.37831298267146	1.68880040341488	0.140955422299715	0.466371026868191	-5.48229607943853
Q9Y5R8	TRAPPC1	0.101591906058346	3.35708267094447	2.01992443716606	0.0886998145655351	0.377570967726084	-5.48703969966144
P52799	EFNB2	-0.157838956698213	3.36340476553381	-1.71959749632706	0.135034772836453	0.453829895702266	-5.48908735445093
P06400	RB1	0.0862244426490542	3.29720713172192	2.73681073024921	0.0330012314226666	0.232990780328626	-5.49333805912686
Q9HCJ3-2	RAVER2	0.120261980152316	3.31340973118521	2.1027003119024	0.0789964368058269	0.357620036903842	-5.49357701105834
Q6QNY1	BLOC1S2	0.144247071504709	3.33575670731403	1.88176299043542	0.107642317083923	0.410240912663416	-5.49466744049017
Q99417	MYCBP	0.344044781486163	3.25916097270015	2.38092394173693	0.0536399794797612	0.298743027859019	-5.49661018896087
Q6ZS17-4	FAM65A; RIPOR1	-0.066489230981619	3.3130067189925	-2.37913240093093	0.0537729632712543	0.29912298194214	-5.49702349719882
P15848	ARSB	-0.108248807616062	3.29856087560408	-2.09287336315879	0.0800896748136716	0.360861345831607	-5.49795900889609
Q96RR1-1	C10orf2; TWNK	0.222156410480797	3.32905076058384	1.55412528386364	0.169896126025822	0.505068120999962	-5.49883596467906
Q9UIS9-12	MBD1	0.178580169681592	3.39543254121278	1.82939434696639	0.115830893302878	0.424776674947611	-5.49944793901751
Q9UBM7	DHCR7	-0.202144771406163	3.32954394341262	-1.93478467312553	0.0999365731257404	0.396198248486663	-5.50168431737687
Q9HBR0	SLC38A10	-0.157920132315739	3.28213269516817	-1.64070115492681	0.150705233992084	0.478789267545603	-5.50212783048292
Q8IW45	CARKD; NAXD	-0.0813688948323856	3.31141727905995	-2.2940572625396	0.0604997750302939	0.314302080102558	-5.5048040047783
Q8TCU4-1	ALMS1	0.117267882618621	3.35355106411687	2.54250491884981	0.0429544261067248	0.265983969422418	-5.50485416758713
Q99584	S100A13	0.201381562406687	3.24144579562536	2.26728818672931	0.0627924028514106	0.319445025895559	-5.50729904991194
Q9UBX3-2	SLC25A10	-0.281851686548186	3.22787449650774	-1.75252677150989	0.12897078577067	0.445978788764062	-5.50756676323486
Q9BX79-4	STRA6	-0.152405880568523	3.34833034697945	-1.52616340742902	0.176571824728517	0.514809062524397	-5.51000317991368
Q9Y6C9	MTCH2	-0.306176925716656	3.26604582657988	-2.37463512458065	0.0541083067731968	0.299855794359321	-5.51022157077349
Q9UIQ6-1	LNPEP	-0.127032902723329	3.32099179529816	-1.86267994980474	0.110557730976909	0.415257860196289	-5.5121096523907
Q8TBA6	GOLGA5	-0.122626426426777	3.28665966471607	-2.0372553506788	0.0865729756411746	0.372058330209025	-5.51278510811229
P04216	THY1	-0.250404258175525	3.35624865246476	-1.86688559890491	0.109908569679317	0.413457566051134	-5.5133703576747
O75718	CRTAP	-0.336131986226329	3.30041382214233	-2.27974762392037	0.0617143427518507	0.316604974301225	-5.51568712215821
Q3B726	TWISTNB	0.0728127825503939	3.36324177798105	2.36973118505063	0.0544764585208388	0.300395368314768	-5.52270374968806
P37268	FDFT1	-0.268380665028418	3.30746474617012	-2.55575809122322	0.0421835107967821	0.264139740503215	-5.52335558756012
Q99569	PKP4	-0.168022296265282	3.32530306663253	-1.86139968347862	0.110756097913606	0.415257860196289	-5.52425067987149
Q8NBM4-1	UBAC2	-0.150089546290089	3.30680199849087	-1.89755119207908	0.105287986620331	0.405011054595235	-5.52473668016063
O60331-3	PIP5K1C	-0.14470369378445	3.32579854588157	-1.79121983295007	0.122183783042549	0.435442205523978	-5.5250996268364
P51452	DUSP3	-0.0987562250135813	3.30780874757292	-2.19789888244536	0.069162084275503	0.335543783233795	-5.52602393648728
Q6UXK2	ISLR2	0.124129700464259	3.40793848768485	1.71648935231884	0.135621221256517	0.454331091209332	-5.52605712423092
Q13009	TIAM1	0.133238715594374	3.34970308240343	2.05432244596747	0.0845288553906528	0.368233635316888	-5.52965500406661
Q8IXW5	RPAP2	0.0870991048904171	3.37238025756585	2.14461535281669	0.0745014353108108	0.347604189820635	-5.52975406185379
Q96MU7-1	YTHDC1	-0.106936969584107	3.29510784903647	-2.40827717433464	0.0516516514704005	0.295676338618052	-5.53227309080365
O75564	JRK	0.172796270202233	3.37540560013253	1.91748403395358	0.102388565044376	0.400937104498724	-5.53293973933423
O43543	XRCC2	0.181578547561125	3.31128374535774	1.41613873630198	0.205278836353868	0.551881403603635	-5.53601536207001
O43464	HTRA2	-0.266072264937973	3.35543028033025	-1.92639754764449	0.101117866353343	0.398054103397953	-5.53701497592836
P61968	LMO4	-0.126003180824033	3.33372573110434	-2.08032639102646	0.0815078930506621	0.363473793814232	-5.53838542235073
Q16514	TAF12	-0.0979941235389981	3.28361048649105	-1.92798206958685	0.100893630439859	0.397959090429304	-5.5395884502831
Q9BRR0-1	ZKSCAN3	0.168147257160952	3.44132943587662	0.933841762351967	0.385544447669586	0.729692406109501	-5.54063908062607
P26641	EEF1G	-0.0916866290662322	3.32708305490173	-3.1439689451209	0.0192893825996741	0.18821821268286	-5.54084550432819
Q96H55-1	MYO19	-0.152461853964776	3.27258576142973	-2.15934046095236	0.0729850055196187	0.343639871385415	-5.54084843723311
Q9BRK3	MXRA8	-0.296513863089663	3.25132033411861	-1.56137491449947	0.168204428842759	0.502053747119675	-5.54120157851901
P26232	CTNNA2	-0.14008964633886	3.32390424154063	-2.42231072433015	0.0506615679085374	0.293375953238853	-5.54144910153517
Q92564-3	DCUN1D4	0.157978982713858	3.36010792814172	1.56468680220022	0.167436890013186	0.501130872632822	-5.54300062972619
Q86Y39-1	NDUFA11	-0.388696303946216	3.19350511415763	-1.67914822495326	0.142862018857027	0.469664144426928	-5.54386118371
Q9H6K5	FLJ22184; PRR36	-0.109420854138225	3.30299668490639	-1.86109545455435	0.110803287462411	0.415257860196289	-5.54740971627739
Q9BYJ9-1	YTHDF1	-0.11766079171716	3.28497658271076	-2.63664523344694	0.0377845878857585	0.248925013603325	-5.54779108646766
P36405	ARL3	-0.0778103014061251	3.31614730168408	-2.45497856126546	0.0484329499967579	0.285903757690113	-5.54866728130167
Q9NVM9	ASUN; INTS13	0.0865546509632945	3.34679259186994	2.7303360685619	0.0332900490075871	0.234311567432641	-5.55200856336876
Q68CP9-1	ARID2	-0.0744602318497528	3.31045840321182	-2.80546850225974	0.030098066149177	0.226608325756571	-5.55355567153535
Q9H694-1	BICC1	0.115741618069469	3.36000597249681	1.74581630554907	0.13018466605536	0.447990376256246	-5.55364296647479
P51149	RAB7A	-0.128046186516094	3.3234149522927	-2.57079396175212	0.0413265478301949	0.260968775176537	-5.55401833437844
Q92506	HSD17B8	0.225955385896872	3.26831128308778	1.00180114242864	0.354170940582635	0.708238959290162	-5.55436434702315
Q9H019-1	FAM54B; MTFR1L	-0.122397115650516	3.28674403748994	-1.94891893785104	0.0979769135149317	0.393056290534486	-5.55537055113986
P23229-1	ITGA6	-0.205178774985116	3.33182599697927	-1.35105904965405	0.224209173445591	0.575556115741555	-5.55572809509875
P51826-2	AFF3	0.428347178588136	3.44592147483044	1.90919321713048	0.103584766515672	0.402772197066823	-5.55584136286715
Q5JXC2	MIIP	0.19531971883091	3.41765712468042	1.28691384608096	0.244386244407544	0.602968844385748	-5.55923810945271
Q9Y2I7-1	PIKFYVE	0.0739685160936306	3.3332916969262	2.43549026322166	0.0497498007768642	0.290638899703006	-5.56059654658273
Q96JQ0	DCHS1	-0.187875957156125	3.33072393116268	-2.49346381723187	0.0459386774268858	0.277788031371963	-5.56181188883535
Q00013-1	MPP1	-0.0892441680798427	3.34905907618789	-2.02420390582441	0.0881697876511734	0.376745903866621	-5.5620240814069
A2RRP1-1	NBAS	-0.150274999408299	3.29124095744861	-2.47011707567429	0.0474352567909101	0.282001970274266	-5.5627153896519
O43281-1	EFS	0.121332207661565	3.37111379071988	2.06061469482762	0.0837876148552322	0.366673428824334	-5.56332159291979
Q15233	NONO	-0.0597475121267377	3.31339961829318	-3.21444069509133	0.0176186019936357	0.181777662303669	-5.56518934737656
Q96IZ5	RBM41	0.0935977515046277	3.36251195066762	1.94091518326991	0.0990818386783058	0.394647470085989	-5.56556642317652
Q9NQZ5	STARD7	-0.0739411991575013	3.35039933658291	-2.38227039422782	0.0535402597451992	0.298743027859019	-5.56642049383976
P09471-2	GNAO1	-0.221741389272141	3.29219196050416	-2.14796239259762	0.0741539438105891	0.346707204138832	-5.56696773401301
Q9Y5J6	FXC1; TIMM10B	0.419454697121663	3.19216977247167	1.66466417479924	0.145769664420411	0.472915562331852	-5.56733074910471
O75190	DNAJB6	0.0861476043746505	3.35300398291213	2.28940348961966	0.0608920381441551	0.316015999663702	-5.56821881139695
Q86UN3	RTN4RL2	-0.217539760162529	3.3563999258749	-0.992905752784147	0.358159337735404	0.711012611208061	-5.56930001381909
Q12815-1	TROAP	0.115584185931724	3.38548940250661	1.87596979543689	0.108519229980879	0.411243688275954	-5.56937563035577
O95140	MFN2	-0.148929139425581	3.29879381605342	-2.2872190945174	0.0610770661509853	0.316069267424049	-5.57060619878825
P49770	EIF2B2	-0.116710711454579	3.28561480016712	-2.26980210812896	0.0625733276325536	0.318814673108828	-5.57635706743239
P04183	TK1	0.116897166678489	3.33573512236269	2.34611769614943	0.0562860563164266	0.304617590727026	-5.57674688995564
Q66GS9-1	CEP135	0.0889235422401486	3.3610885217667	2.37144366076625	0.0543476027619582	0.30031037635283	-5.57772713206488
Q8IWE4	DCUN1D3	-0.156161753061283	3.37579435154932	-1.39293785973805	0.211854615925719	0.558169849273424	-5.57820437362763
Q9BS26	ERP44	-0.214891705679695	3.28566293110151	-2.54556646012237	0.0427750307290233	0.265829812009902	-5.58008496473519
P61009	SPCS3	-0.298315046028263	3.29461946913328	-1.90462724312166	0.10424947503875	0.403740741479553	-5.58175003363279
Q9Y3A4	RRP7A	0.111240279068595	3.34703638557562	2.1704318321149	0.0718636614898644	0.341907680285775	-5.58195914882101
Q9H2A2-1	ALDH8A1	-0.246658411608127	3.3390472989637	-1.46709933241886	0.19148531902756	0.533895812519623	-5.58254328264333
Q9NYK6-1	C21orf91	0.148360227218028	3.40704418963698	1.43297209669256	0.200624897968556	0.545973524122391	-5.58295774606166
O15063	KIAA0355	0.118036180719979	3.3444048043592	1.9694358196086	0.0952005170953538	0.389487408808932	-5.5860574594173
Q5SWX8-1	C1orf27	-0.158226141703291	3.32397744565265	-1.99107892940308	0.0923571507827544	0.38480086769453	-5.58790768119816
Q96PV7-1	FAM193B	0.127548251173202	3.36656043902199	1.73329279715106	0.132479864103037	0.450933013626123	-5.58956383682118
P05026	ATP1B1	-0.136886141205353	3.3668003766962	-2.14981798591712	0.0739620091525718	0.346535287637924	-5.59044441658504
Q9Y3Y4	PYGO1	0.194910308037214	3.31606075333631	1.00912017397906	0.350915854688738	0.705048070930896	-5.59089061745892
Q9C0A6	SETD5	0.147792033144796	3.34042803394319	1.77811422288635	0.124442571304735	0.43984702716948	-5.59298984482897
P09417	QDPR	-0.080673974633128	3.31567024618988	-2.56784584531713	0.0414931138948353	0.261773882387379	-5.59632062026676
O94776	MTA2	0.17244410351202	3.34905182282645	2.68977113292045	0.0351619677607681	0.239557769446028	-5.59741898225902
Q92753-2	RORB	0.125507445739091	3.3400953572529	1.70286723694475	0.138220651212472	0.460087676751105	-5.59751732373698
P20962	PTMS	-0.144266369655908	3.31667841302662	-2.24687065373361	0.0646012865115248	0.324914558079057	-5.60011166814853
Q9UBB9-1	TFIP11	0.0663207318407507	3.32984369727498	2.59943863478474	0.039744462489539	0.255800094793382	-5.60014577400149
P57105	SYNJ2BP	-0.253131684752269	3.26196493747019	-1.77652038542862	0.124720042981805	0.440265694403633	-5.60035670638785
Q53EL6-1	PDCD4	0.122387702865822	3.35128454310591	2.56572603413889	0.0416133196006766	0.261792714858717	-5.60104158925445
P18065	IGFBP2	0.154475956472573	3.3893424468899	1.83264107701864	0.11530581168068	0.424364708151767	-5.60665245184681
Q96RG2-1	PASK	0.0909574984724455	3.33015034808142	2.23321248058719	0.0658412571011185	0.327738798348807	-5.60769143180679
P51572-2	BCAP31	-0.26781416336512	3.34639302461475	-2.40978455380336	0.0515443413097926	0.295590640636542	-5.60818111880966
P62701	RPS4X	0.103417179917607	3.31064158403165	2.82754584741782	0.0292235836170075	0.226094700039204	-5.61097510255508
Q8N302-1	AGGF1	0.17344100502736	3.35349884895991	2.07328046642987	0.0823154642447792	0.364998846376848	-5.61272205488972
Q9NXW2-2	DNAJB12	-0.130708680767684	3.312610125966	-1.66422250597002	0.145859215544868	0.472915562331852	-5.61524759549805
P15336-1	ATF2	0.0800880772643745	3.36325249283508	2.22323587740482	0.0667624686097034	0.329953910520161	-5.6165827549479
Q9Y2F5	KIAA0947; ICE1	0.124442591420216	3.35434644981905	1.8885080542019	0.106630170021531	0.408474636446118	-5.61667893440576
Q13564-4	NAE1	0.106222735469188	3.31786079358543	2.28365920923879	0.0613798519540738	0.316069267424049	-5.61837600533938
Q10469	MGAT2	-0.137429439225974	3.33935616872343	-1.8423755862406	0.113745502157019	0.420850894759897	-5.62212813403199
O75503	CLN5	-0.149200683265159	3.3200357936006	-1.83988752042678	0.114142313954481	0.42151815987177	-5.62264747414252
Q9UJY4	GGA2	0.0900279761158902	3.32517831395651	2.3033625819089	0.059723263912968	0.312523186369633	-5.62303382083522
Q96F63	CCDC97	0.121850386733991	3.36977807531826	2.07334814479289	0.0823076687830276	0.364998846376848	-5.62403064862491
A3KN83-1	SBNO1	0.117926616855325	3.3315665303654	2.54781534360353	0.042643757728534	0.265779699331328	-5.62580391879634
Q14562	DHX8	0.0687649700137583	3.36487424156781	2.81306093370374	0.0297942089623057	0.226223665175336	-5.62957283325711
P27824-2	CANX	-0.253907411833001	3.34286642277598	-2.54282022271687	0.0429359138295187	0.265983969422418	-5.630536100777
Q7L5N1	COPS6	-0.113114597129536	3.3105871905286	-2.43699280397884	0.0496469502461911	0.290638899703006	-5.63173365814759
P26358-1	DNMT1	0.200501852856462	3.33252981369527	2.77410553831826	0.0313888466198917	0.22934053691742	-5.63207131756245
Q92598	HSPH1	0.068974814905037	3.34042331874195	3.27389826977092	0.016331284752461	0.174074889187826	-5.63218109433154
Q92820	GGH	-0.17447523367275	3.30090945549873	-2.37480381861669	0.0540956886841532	0.299855794359321	-5.63239131611645
P36639	NUDT1	-0.125323426001059	3.30217183246245	-1.96543034702851	0.0957362872041892	0.390239222032226	-5.63284489273397
P31146	CORO1A	-0.116951235480527	3.28581888663862	-2.39402718893367	0.0526777106777655	0.297338383775087	-5.6330323225611
O14972	DSCR3	-0.138578527966203	3.34265187725336	-1.61812177976729	0.155501663987266	0.486480762978038	-5.6335491633003
Q9UBZ9	REV1	0.153660389710412	3.37421460447375	0.735884351769754	0.48887630158689	0.811161768358634	-5.63396174817951
Q9H5I1	SUV39H2	-0.0842075447167931	3.36558085318673	-2.05795255894249	0.0841004136870097	0.36708323889444	-5.63517598945671
Q9Y5U2-1	TSSC4	-0.0887158527003196	3.27565994352228	-2.03368837525463	0.0870064643476643	0.372725902256618	-5.63594264512406
Q9NZ72	STMN3	-0.136775000055531	3.26250087175624	-1.78482541467558	0.123280822774109	0.437722052245113	-5.63683468548394
O94901-9	SUN1	-0.168534185889281	3.30063374529374	-1.41186151217686	0.206476969194894	0.552253769902511	-5.63700021338823
Q7Z3C6	ATG9A	-0.113119112544841	3.32095004350248	-1.72062768533433	0.134840937918721	0.453829895702266	-5.63862169731082
Q8NE01	CNNM3	-0.133573792385532	3.35851799728795	-1.95029553243683	0.0977881188300473	0.392794002494794	-5.64178854391538
P61619	SEC61A1	-0.137592692963209	3.32555040484701	-0.558489654601747	0.596220967693121	0.877888309074912	-5.64355338130781
Q9BQE4	VIMP; SELENOS	0.2200340261607	3.44977935534405	1.41303788927716	0.206146809234126	0.551881403603635	-5.65110018038901
Q08380	LGALS3BP	-0.174132011138669	3.33487502825754	-1.72809961915969	0.13344310500507	0.451699509723586	-5.65188157178037
Q9UKU9	ANGPTL2	-0.179903576535683	3.28413691547922	-1.39036476572485	0.212595571262512	0.559462029638191	-5.65255495704956
Q9NZC7	WWOX	-0.108026703685634	3.27635137553005	-1.96614393614579	0.0956406171354773	0.390239222032226	-5.65382049815389
Q9Y324	FCF1	0.145176383623839	3.35676454247344	1.74293268057601	0.130709702416653	0.448846371343288	-5.65608187858605
Q9NPB8	GPCPD1	-0.0899818349103962	3.27565727503235	-2.23789677092642	0.0654132489629932	0.327095014811883	-5.65733864114582
Q8IWT0	ZBTB8OS	-0.183499964905697	3.3494953780403	-1.45620867521103	0.194359440587742	0.536656386728447	-5.65903859130627
Q8NDT2	RBM15B	-0.0815043653903304	3.32004145786286	-2.30294865533114	0.0597575849164292	0.312523186369633	-5.65997412579673
O75915	ARL6IP5	-0.156998755600638	3.32151273490296	-1.42904986752542	0.201700574496824	0.54766613007008	-5.66097898857503
Q13432	UNC119	-0.137867956708664	3.33559214969785	-1.49031925556375	0.185488073785365	0.525829003478261	-5.66115573974389
Q15811-2	ITSN1	-0.0586576385232397	3.33128055085897	-2.5481878891153	0.0426220523709462	0.265779699331328	-5.66384667650838
Q6PFW1-1	PPIP5K1	0.129142670444495	3.30613431844229	1.43961164436488	0.198815965652914	0.544039924633106	-5.66490275479418
O75063	FAM20B	-0.12743963436773	3.30548351836708	-1.91018190488349	0.103441390963928	0.402472310951404	-5.66548943443184
Q8N5C8	TAB3	0.133998102635578	3.30874149316122	1.28385095184506	0.245388728714053	0.60396144542336	-5.66687485426734
O15169	AXIN1	0.133820274195832	3.4269608755886	1.3611315189024	0.221179833366066	0.571587652809638	-5.66835267448826
P42658	DPP6	-0.141292979235159	3.28957718768124	-1.4720863637774	0.190182342760858	0.532557358591133	-5.66986398575554
P61019-1	RAB2A	-0.132598277003342	3.27814415705689	-2.3904794133381	0.052936458889541	0.297795360671641	-5.67233957621154
O14939-1	PLD2	-0.0923342581179394	3.33020103764185	-1.98461716524664	0.0931970214457855	0.386877350487462	-5.67357992207777
P16435	POR	-0.241571055343219	3.31117168682018	-2.31031040466622	0.0591502199336945	0.312175553353281	-5.67484189023703
Q9BXK5-1	BCL2L13	-0.216632979346848	3.28142225896906	-2.01599299461249	0.0891895683862563	0.377969707898746	-5.676855059559
Q92844	TANK	0.108727827527332	3.3447913378025	2.05338890035583	0.0846393932056059	0.368319750989779	-5.67858501441241
Q7KYR7	BTN2A1	-0.153686713641809	3.32877674350099	-1.35233733269095	0.223822670139894	0.575004559025035	-5.68239266586866
Q9NQS3-1	PVRL3; NECTIN3	-0.169249553605924	3.3579799930616	-1.38491960393065	0.214171326041354	0.560964771101279	-5.68471579084367
Q8WUD1	RAB2B	-0.135239701350801	3.30782223504487	-2.31440332666713	0.0588153140151143	0.312005228742095	-5.68532994327093
P23468-1	PTPRD	-0.194936981687304	3.33586233318453	-1.5747878935504	0.165116274601233	0.498514174013041	-5.68539443091581
O95235	KIF20A	0.198800194624585	3.39499935357614	2.71543334716823	0.0339651110673905	0.235819942125924	-5.68557076322648
P78364	PHC1	-0.0972038085536167	3.32142461595024	-2.25789171636578	0.0636182959396046	0.321692515317246	-5.68651418649763
O95159	ZFPL1	-0.129745443012467	3.29841016911298	-2.03102960781579	0.0873310053739837	0.37387714760747	-5.68660030077338
Q04721	NOTCH2	-0.188829294210635	3.3070944526749	-1.27446004561523	0.248484975675305	0.60760924708925	-5.68679279249423
Q8WZ82	OVCA2	-0.100689056061866	3.33476076846824	-1.69865255413924	0.139034621350847	0.462125371398643	-5.68710167143882
Q9HCI7	MSL2	0.121353866959061	3.36783305564808	1.68017049026598	0.142658921202756	0.46945715719964	-5.68790878939578
Q8NBJ7-1	SUMF2	-0.37125584152893	3.29657860555823	-2.19099438913986	0.0698312331174159	0.337149370893749	-5.68822518936726
Q96RQ1	ERGIC2	-0.11094806819622	3.30967156811502	-1.74386272740407	0.130540139519671	0.448846371343288	-5.69092245033471
Q969J2	ZKSCAN4	0.105163658682011	3.39166248144647	1.92793417825528	0.100900400577083	0.397959090429304	-5.69118754973901
Q8NBX0	SCCPDH	-0.145332374232462	3.30435387652062	-1.88331260941291	0.107408945312666	0.410221097115936	-5.69192546401186
Q6NSI8-1	KIAA1841	0.179715468803991	3.31665822323654	1.21951665626947	0.267294368266774	0.63147823250613	-5.69283810188305
Q9NYL2	ZAK; MAP3K20	0.0760734143163111	3.34010541611283	2.04690095005821	0.0854116595080422	0.369904426349846	-5.69630424274603
Q96PD2-2	DCBLD2	-0.145483530940838	3.39301440849311	-1.10374794822532	0.310961011160843	0.674033896725217	-5.69664441135132
O60239	SH3BP5	-0.0913909053548675	3.31033660866311	-1.92506282579721	0.101307137033307	0.398098427051706	-5.69952197317792
Q8IZQ5	C11orf31; SELENOH	-0.105736507112339	3.30023644104524	-2.04758512243718	0.0853298867993924	0.369904426349846	-5.70003294604159
P30533	LRPAP1	-0.327617590933287	3.28242252512119	-2.31685645640823	0.0586155282864251	0.311555865821413	-5.70027168629813
Q9H9F9	ACTR5	0.0793550210694481	3.33622657031913	2.17163782516595	0.0717428028049338	0.341632394309209	-5.70157861816032
Q14596-1	NBR1	-0.0738681951742301	3.36151967793274	-2.07895250298671	0.0816647283430185	0.363557262390847	-5.70354970687506
P23142-4	FBLN1	-0.167481500565458	3.32563703698836	-1.22840946673199	0.264168544869632	0.628302893371151	-5.7046596234844
Q96B54	ZNF428	-0.135990501743941	3.31564730696651	-1.20294401206287	0.273204911756796	0.63756010047255	-5.70491058156002
P52948-1	NUP98	-0.0904165463803501	3.31820737058899	-2.854301294612	0.0282001427274278	0.221761685767331	-5.70582338671391
Q9P2M4-1	TBC1D14	0.136342931354388	3.38999495867087	1.6014355742899	0.159139257599503	0.491376608357648	-5.70808649431612
O15014	ZNF609	0.0765371586266319	3.3467878181334	2.52273337711659	0.0441322349621408	0.270526966373599	-5.71183927094227
Q14686	NCOA6	0.102547298702929	3.35177234844889	2.39737856185639	0.0524344988308705	0.296465098874964	-5.71407401727055
Q96CG8	CTHRC1	-0.244953094653541	3.31141949547468	-1.79955022726655	0.120768932545755	0.433396812028151	-5.714771610086
P04792	HSPB1	-0.121789418583922	3.28879214031726	-2.46475278776636	0.0477862974448594	0.283226909027261	-5.71820081662381
Q12841	FSTL1	-0.286740591836125	3.28169085902863	-1.79738734237858	0.121134730625469	0.434012136465584	-5.72223323978111
Q9HCJ6	VAT1L	-0.0930854043180495	3.31463912213441	-2.37549443963895	0.0540440631189956	0.299855794359321	-5.72254734896224
P50454	SERPINH1	-0.346641035355442	3.29799084348777	-2.56588627781211	0.0416042200080291	0.261792714858717	-5.72363344503735
Q9H6H4-1	REEP4	-0.201611434006551	3.31576372179593	-1.2724723131332	0.249144731971645	0.608354720661522	-5.72421978832231
P49759-3	CLK1	0.135094722768186	3.38483950252641	1.93390544259658	0.100059760299356	0.396217726953715	-5.72476405584763
Q8NBJ5	COLGALT1; GLT25D1	-0.331476544825694	3.29665675653162	-2.38246035697995	0.0535262064647166	0.298743027859019	-5.72490413809334
Q96FF9	CDCA5	0.168766408859422	3.33445249398186	1.96903537617608	0.0952539447388152	0.389487408808932	-5.7249445084901
P48723	HSPA13	-0.228510582494753	3.31351434716671	-2.06497844931969	0.0832774239587183	0.36661824144077	-5.7254200671724
Q8IZ81	ELMOD2	-0.184081151103646	3.30833743457927	-1.63692315097353	0.151497820434325	0.480138982366648	-5.72603688173725
Q14108-1	SCARB2	-0.205653067530819	3.36681461023728	-2.24725362167905	0.064566867413933	0.324914558079057	-5.72615769330985
Q8N129	CNPY4	-0.362059419936468	3.28403891167603	-1.73690082175887	0.131814616791917	0.45046928651977	-5.72628508947566
Q9NYH9	UTP6	-0.113438627000225	3.32331219010416	-2.43540499049297	0.0497556444715444	0.290638899703006	-5.72727922423588
P62745	RHOB	-0.139955049216586	3.34724605313871	-1.8318724706112	0.115429903374418	0.424467811530518	-5.72746828928132
Q9H2H0	CXXC4	0.127321616104878	3.32009318646664	0.688291589704159	0.516349886089909	0.828059466500833	-5.72751676384851
Q6P9B6	KIAA1609; TLDC1	-0.101463757115119	3.33643355736798	-2.23445574366014	0.0657273784652779	0.32762827140014	-5.72850123398811
Q8N5I9	C12orf45	0.106841768534584	3.35113936337537	2.00986618211522	0.0899582459796464	0.379069338404799	-5.73143040900804
Q14571-1	ITPR2	-0.193532927002784	3.20283721376254	-1.27211440207778	0.249263690971082	0.608403180147997	-5.73200812813663
Q8IVL6-1	LEPREL2; P3H3	-0.224980978253207	3.30771535744912	-1.96490034770866	0.0958074056535752	0.390239222032226	-5.73250550849744
Q92551	IP6K1	0.154432524629464	3.33848810040196	2.0860717518193	0.0808553407600513	0.362847142057832	-5.73271528772685
Q9NRG1	PRTFDC1	-0.087094315022317	3.31481459216049	-2.01893145554038	0.0888232573331217	0.377611563535479	-5.73757548075144
Q9ULW3	ABT1	0.105330818860858	3.370169170627	2.00532084404702	0.0905328182788227	0.380275161050215	-5.73872745754288
P23771-2	GATA3	0.133972179603809	3.42012214480008	1.71140185402321	0.136586460188314	0.456879322646881	-5.74187539575983
Q15628	TRADD	-0.128886690914434	3.37548544860999	-0.983536883506027	0.36239836250642	0.713793549864904	-5.74258097271082
Q8N8R7	ARL14EP	0.100166147111479	3.34161654320201	2.04426293414486	0.0857276993599977	0.370087361927825	-5.74384520319607
O14657	TOR1B	-0.371222254718324	3.28914080079933	-1.79865928694707	0.120919481568584	0.433704778645349	-5.74423988763462
O60294	LCMT2	-0.10281585006421	3.28936060300199	-1.93763582900644	0.0995381441825629	0.395320430363468	-5.74525298920366
O75179-1	ANKRD17	0.0757149410417431	3.33279367339864	2.69762936044508	0.0347907694835532	0.238951706949584	-5.74556638646684
P27816-4	MAP4	-0.282219472619396	3.31565391196691	-1.73619722625969	0.131944090592316	0.45046928651977	-5.74688752227048
P07947	YES1	-0.14800066299748	3.33902192760742	-1.77354949538937	0.125238860425844	0.440548859734676	-5.74809399551436
Q9Y680-1	FKBP7	-0.376281922813197	3.27322817107605	-1.70895343337795	0.137053358546618	0.45756528021634	-5.74949394648131
Q92934	BAD	-0.10371383417089	3.30706072163354	-1.79740337599091	0.121132014948349	0.434012136465584	-5.75119231468666
Q9P2F5-1	STOX2	-0.133959359008797	3.28969767781455	-1.25274285716342	0.255776939080359	0.616662645497808	-5.75165938465115
Q5SXM2	SNAPC4	0.0935537193729523	3.35408132837902	2.04196862242176	0.0860035239022466	0.370800263928605	-5.75701824170542
Q4ZG55-1	GREB1	-0.137254968114588	3.26289473751088	-1.30251024818355	0.239337416197142	0.594950359116817	-5.75828553387483
Q14153	FAM53B	0.141668223827354	3.31478676271856	1.28638922915795	0.244557694705283	0.603068293899667	-5.75870296516157
Q9NQS1	AVEN	0.109894067874472	3.34879452792534	2.06320469195012	0.0834844231116573	0.36661824144077	-5.75883398579846
P16401	HIST1H1B	-0.145379891146958	3.3239186030884	-2.42154570737867	0.0507150260844657	0.293428907397167	-5.75915192095369
Q9ULD2-1	MTUS1	-0.122736099264275	3.31050059244614	-1.30728885022794	0.237809082955329	0.594079364578934	-5.76020856793361
Q8IV08	PLD3	-0.150674044593426	3.324424783178	-2.4666738389385	0.0476602710204108	0.282837746533881	-5.76089377524815
P52272	HNRNPM	-0.0790047916949065	3.30497505561678	-3.25605535710493	0.0167064802906601	0.176273099129799	-5.76300942706682
Q9H5J8	TAF1D	0.0993663003857601	3.34904593126372	1.76879543465362	0.126073467074455	0.441353506264344	-5.76636917050849
Q9GZZ1-1	NAA50	-0.0865650194647558	3.29481635410733	-2.62828184694819	0.0382160295322065	0.250535614350082	-5.76781008903283
P62826	RAN	-0.0743109311680371	3.30855773871958	-2.94035810578386	0.0251611386738131	0.209822015129433	-5.76795160569827
Q8WY54	PPM1E	0.0796141765996514	3.32023755258846	2.10450957657238	0.0787968183023332	0.357620036903842	-5.76919091981573
Q9UET6	FTSJ1	-0.0856624985833955	3.31393088147722	-1.87822953314025	0.108176335565012	0.411212332650749	-5.76968496318291
Q03164-3	KMT2A; MLL	-0.130513820471653	3.3576326278442	-1.73147079846395	0.132817041297327	0.450956683971374	-5.77231221372366
O60313-2	OPA1	-0.17970585445381	3.31362827008986	-2.64324996988869	0.0374475214997925	0.247979651739055	-5.77345005257391
Q9ULJ3	ZBTB21; ZNF295	0.127169417837848	3.34164747375283	1.81038927897158	0.118952033003901	0.430566516005477	-5.77476802359956
P05023	ATP1A1	-0.137022104549919	3.35069818866185	-2.79090501167797	0.030690237066032	0.227417990946656	-5.77822626432212
Q9BUI4	POLR3C; LOC101060460	0.0636943474958579	3.35008253223216	2.27689285518649	0.0619596517444578	0.316803645429141	-5.77911629572705
Q9NP97	DYNLRB1	0.26665159577699	3.19516300924563	2.21491886433253	0.067540572552962	0.332195375753094	-5.77984633117697
O43924	PDE6D	-0.110081259829814	3.4011288814873	-1.63299875819205	0.152325332227217	0.481405531095451	-5.78554337254711
Q99470	SDF2	-0.373565206461428	3.25819555515925	-1.85488287881026	0.111771291134182	0.416862869104997	-5.787404114224
O00571	DDX3X	-0.0412501943437144	3.32174727809339	-2.86546267806678	0.0277846294014142	0.220826829169009	-5.78757646288666
Q14181	POLA2	0.110999042099116	3.32839673558405	2.27590287307571	0.0620449557164588	0.316803645429141	-5.79009090083398
Q13352-5	ITGB3BP	0.144063909367669	3.35950634063015	1.70853661149612	0.137132997414091	0.45756528021634	-5.7902143674258
Q96EW2-1	HSPBAP1	0.1567545766552	3.40551605198116	1.4013423754143	0.209450730056025	0.555990448246976	-5.79050369948521
Q8N7B6	PACRGL	-0.147799108984468	3.28271184250495	-1.3417837056174	0.227031657783441	0.579692114004974	-5.79136936694596
Q9BYI3-3	FAM126A	-0.112275564973346	3.34297074535714	-1.55531331271199	0.169617807946418	0.504635574263321	-5.79142537748838
Q15043	SLC39A14	-0.101167466698182	3.35058415701882	-1.7848291414014	0.123280180610761	0.437722052245113	-5.79263013453881
P14678-3	SNRPB	-0.0843169079506629	3.33386773542123	-2.79490087602645	0.0305265286949009	0.227417990946656	-5.7931579272295
Q13686	ALKBH1	0.174459887609453	3.35787636559199	1.27925499070721	0.246899781405779	0.60566459427154	-5.79379998655589
Q9Y3D6	FIS1	-0.139632204022139	3.31184711973208	-1.57340361898964	0.165432492571867	0.498514174013041	-5.79558677777166
O15173-2	PGRMC2	-0.16493894685885	3.34142271421949	-1.58604436118886	0.162566010500236	0.494637724955305	-5.79610154311114
P40429	RPL13A	0.163884999096121	3.26841673859798	2.58246549118394	0.0406740198690791	0.259045563804971	-5.79624818931754
P55789	GFER	0.137812615409591	3.40580643698797	1.94560708798748	0.0984326155939739	0.393809693456251	-5.79843284197091
O95168-1	NDUFB4	-0.22054874321893	3.25753615436137	-1.25143018593666	0.256223629892958	0.617295332715864	-5.79893364452027
Q9H5H4	ZNF768	0.155240663247451	3.38420509119342	2.08235203399775	0.0812772145451691	0.363186905367154	-5.79993146719104
P12829	MYL4	0.145120648048149	3.23214471198433	1.57778201960418	0.164434259901857	0.497501204568896	-5.80161615654817
Q6P2P2	PRMT10; PRMT9	0.109353661575968	3.32834535848852	1.70943674471054	0.136961072045663	0.45756528021634	-5.8032106425484
Q7Z333-4	SETX	0.136423228314345	3.31789847636131	2.06872656835397	0.0828417239874595	0.3658797302017	-5.80542629433109
O95677-2	EYA4	0.099948759144246	3.32171350221343	1.78867931530826	0.122618490842145	0.436527039661198	-5.80542917616851
A8MXV4	NUDT19	-0.176115445423187	3.28162067344816	-1.20591993372053	0.272135352341202	0.635807068382032	-5.80543862852123
O43491-1	EPB41L2	-0.163422765778575	3.31158260289882	-2.6622298497399	0.0364965449469863	0.244771622767576	-5.80678968487424
Q9BU02-1	THTPA	-0.0972823900962162	3.34303129481212	-1.67609969756494	0.143469335126258	0.470573033951979	-5.80766322741037
Q9H0F7-2	ARL6	-0.115391485825143	3.32379308445451	-2.13861509189309	0.075128555221106	0.348829743576861	-5.80878852070833
P54819	AK2	-0.200931703392881	3.32430228785429	-2.41475740244936	0.0511919738591549	0.294408776700719	-5.80979303043461
O00308	WWP2	0.100251190588987	3.34348308199098	1.84161797179509	0.113866186824804	0.42096889842234	-5.81062936655006
Q16288-1	NTRK3	-0.12626237662852	3.3369484349064	-0.842618589519671	0.43095048991188	0.765668377073159	-5.81090931378106
Q8TE02-4	ELP5	-0.112483311125361	3.32856607358013	-1.46046690908446	0.193230960079158	0.535420774412885	-5.81099082330769
P28702-3	RXRB	0.0989543024370026	3.33925781511413	2.09201713339098	0.080185654943062	0.361051000079648	-5.81220424776036
Q562R1	ACTBL2	-0.169593611695967	3.25057272467744	-1.47074875829575	0.190531016665567	0.532564794184105	-5.81241639074814
P14316-1	IRF2	0.133824641638238	3.40682585485573	0.635139794003799	0.548199689801907	0.850413966583185	-5.81250226412047
Q9P0L2-1	MARK1	0.121697152402283	3.34573311363106	1.77413618664462	0.125136237613143	0.440548859734676	-5.81439579964453
Q8IYB1	MB21D2	-0.0266470346338818	3.33703659089083	-0.103518760041568	0.92084099640997	0.988690911544515	-5.81503390248094
Q13418	ILK	-0.0795424451076316	3.30036723906139	-2.15138316691552	0.0738005083100253	0.346378141830691	-5.81839120510339
P09972	ALDOC	0.0748859251182727	3.31210418286085	2.26339625819732	0.0631331283767533	0.320180078502089	-5.8209700544484
Q9Y3B6	EMC9	-0.117855525944391	3.26233121934472	-1.40212960621157	0.209226838080653	0.555796732508117	-5.82098696684761
Q6ZVM7	TOM1L2	-0.113246229935051	3.33518872621164	-1.90025142857351	0.104890480541989	0.40412498603547	-5.82137816780087
Q6PID6	TTC33	0.169635797894572	3.36051078050434	1.87476284725251	0.10870281424912	0.41147392964356	-5.82220947431019
P67809	YBX1	0.146655872689047	3.35818756236654	2.7294853424451	0.0333281975766129	0.234311567432641	-5.82343556662262
P01130	LDLR	0.151648955253777	3.34331515062832	1.98162471992875	0.0935885605124446	0.387049539659199	-5.82343661209739
Q15643	TRIP11	-0.0752541186683929	3.31973326284224	-2.49378264628653	0.0459185865164337	0.277788031371963	-5.82454207142828
Q9H074	PAIP1	-0.0815683937076231	3.2932060013476	-2.29416981253309	0.0604903207394673	0.314302080102558	-5.82530064905819
P19388	POLR2E	0.0797216795157808	3.37041345931603	2.11420016007897	0.077736348828941	0.354890029809559	-5.82563664347025
Q12962	TAF10	0.22391651645901	3.27502246141541	1.73121765094456	0.132863954352163	0.450956683971374	-5.8258326177401
Q9Y5K8	ATP6V1D	-0.0962155916859738	3.32637330478428	-2.16358922872055	0.0725533515134991	0.343145880657545	-5.82823758170933
Q13433-1	SLC39A6	-0.186044343966425	3.26778362625305	-1.4771361496245	0.188871324282263	0.530804476799985	-5.82889014235252
Q9NP08	HMX1	0.141312379533301	3.41203326848553	0.70873552026542	0.504425900932078	0.821101442236376	-5.8294637104755
O60476	MAN1A2	-0.160053809254567	3.31595140326375	-1.75409999682238	0.128687797369723	0.44558565497527	-5.83407139457442
P45880-2	VDAC2	-0.333406052066838	3.26998346548248	-2.39460897022521	0.0526354060268803	0.297338383775087	-5.83479960653859
Q15904	ATP6AP1	-0.155807945378049	3.30609725740729	-1.49691027759002	0.183817742760437	0.523630474700225	-5.83562116499533
Q6ZN17-1	LIN28B	-0.108538153127225	3.27430223644361	-2.10987800228969	0.0782075287834931	0.356319652592717	-5.83566057208286
Q99633-1	PRPF18	0.0788425288162421	3.33497073247408	2.2052536500284	0.0684565352301138	0.333327606135002	-5.83685224089886
Q15392	DHCR24	-0.210794263744318	3.3295607419875	-1.67003056092211	0.144685803642964	0.471725004578032	-5.8369268119596
Q96ER9	CCDC51	-0.252456728045338	3.28312683702728	-1.66711385652684	0.145273933296649	0.472722366725376	-5.83825683907127
P54274-1	TERF1	0.139456795817821	3.35350962233727	1.46215789828993	0.192784506259148	0.535290589281513	-5.84243613291246
Q8WXB1-1	METTL21A	-0.126874832557287	3.33312939311569	-1.30292433940103	0.239204634429603	0.594950359116817	-5.84280138690396
Q96JC9	EAF1	0.0937368852689276	3.38864820610548	1.88195366223072	0.107613574910621	0.410240912663416	-5.84289777933899
Q9NPG3-1	UBN1	0.0667961686467792	3.34607314153518	2.15021725899378	0.0739207764707241	0.346535287637924	-5.84566532443552
P49761	CLK3	0.0868397275020252	3.31660849363193	1.86975353290486	0.109468055303264	0.412803423057564	-5.84740410698085
Q4VC31	CCDC58	-0.112538112746399	3.34713913954722	-2.10536608997464	0.078702497138688	0.357496088697769	-5.85036902926311
Q16643	DBN1	-0.118408449566551	3.28240850719969	-2.75953789791763	0.0320084125553568	0.231344513614768	-5.85097852743226
Q9BSQ5-1	CCM2	-0.0887700562164188	3.32563622908303	-1.82223210600114	0.116997553149687	0.428108581162484	-5.85101668255354
Q5NDL2	EOGT	-0.235300290904929	3.29399366817994	-1.58335844878931	0.163171125974603	0.495222174010084	-5.85335359310406
Q92843-2	BCL2L2; PABPN1	-0.064503964710539	3.30241350327583	-2.39138977770144	0.0528699374842152	0.2976710765918	-5.85356957342977
Q9Y320	TMX2	-0.249219724856868	3.29674304987678	-1.60719974775594	0.15787362207244	0.489927405227118	-5.85366956714076
Q9NX70	MED29	0.371058485868819	3.24835915899481	2.07383841353801	0.0822512200413674	0.364998846376848	-5.85390826901888
Q8WU76-1	SCFD2	-0.114915539100163	3.28238081070232	-1.83057117613663	0.115640297590569	0.424644318294181	-5.85498445052856
O94760-1	DDAH1	-0.0802151246998947	3.31279435084093	-2.27732587827559	0.061922377492278	0.316803645429141	-5.85505902075782
Q7Z5U6	WDR53	0.0959774080277199	3.33323295542322	1.95921146619935	0.096574114206227	0.390992593701062	-5.85599977817041
A0JLT2	MED19	0.117952693793429	3.31116009774952	1.59672342530455	0.160181047458743	0.492751615231211	-5.85676270802182
Q5VVJ2	MYSM1	0.160064764468082	3.32181290394267	1.7321661031889	0.132688270778716	0.450956683971374	-5.85723349626945
Q05519	SRSF11	0.0778964982813997	3.3318886485406	2.48989670132443	0.0461640890776506	0.278020194925054	-5.85748438341006
Q92993-3	KAT5	0.104026457890591	3.36316823743465	1.86697449099396	0.109894889553054	0.413457566051134	-5.85858879728106
Q9NRH2	SNRK	0.0951128930988145	3.37187112291825	1.63735351646054	0.15140733361708	0.480089510286056	-5.85864070221738
O14639-5	ABLIM1	-0.151235117605605	3.31638590175925	-2.12275617071957	0.0768121248390056	0.352735597273021	-5.86006685205402
Q03468	ERCC6	0.142301209105637	3.36990848885512	1.70639219263686	0.137543422172884	0.458706285992197	-5.86095586090636
Q13185	CBX3; C15orf57; CCDC32	0.111982220627929	3.33449410829424	2.47841897093597	0.0468973037801531	0.280797082508513	-5.86411259728919
Q9H0H0	INTS2	0.118780126824826	3.34956718384582	2.13866945219258	0.0751228496004248	0.348829743576861	-5.86501053741017
Q8TCZ2-5	CD99L2	-0.127489581332936	3.31374754195439	-0.746945538885353	0.4826349360439	0.807362423233912	-5.86581136523627
Q9Y653	GPR56; ADGRG1	-0.148289106295757	3.300889072792	-1.82847745546445	0.115979604611999	0.425089360448793	-5.86796823067302
Q9H7B2	RPF2	0.101132100713191	3.34188846556942	1.87723686819861	0.108326830914712	0.411212332650749	-5.86919446353096
Q29RF7-1	PDS5A	0.0946397787072888	3.29017490881805	2.63066527796057	0.0380925458549747	0.24997067309337	-5.86965048985728
Q6ZTW0-1	TPGS1	-0.116788929686078	3.32349479987225	-1.58883518481066	0.161939508871223	0.494226098196112	-5.87231855919453
P54709	ATP1B3	-0.147535397181218	3.40321197963919	-2.08158304520236	0.0813647082024028	0.363186905367154	-5.87258882127674
O14965	AURKA	0.142148131731897	3.41040456599507	2.23867798756565	0.0653421478356801	0.327095014811883	-5.87347759916997
P21675-4	TAF1	0.0678720927985616	3.33615356827725	2.28480917478399	0.0612818722631845	0.316069267424049	-5.87475493775749
O14773	TPP1	-0.119046070912979	3.32581855393343	-1.768872234687	0.126059941278235	0.441353506264344	-5.87571901356436
Q6IA69	NADSYN1	-0.0901628457471894	3.31402751614555	-1.75457333757466	0.128602772227296	0.44558565497527	-5.87696070130644
Q9BUL8	PDCD10	-0.0818163350115643	3.29930567305146	-2.0284818514136	0.0876431425451221	0.374973853800969	-5.87859946160897
Q9Y6R4-1	MAP3K4	0.0844046701341352	3.32736942423919	1.90119206055642	0.10475235919787	0.40412498603547	-5.87881614951322
Q7Z3B4	NUP54	-0.0804902889904285	3.32355081164978	-2.34135605843652	0.0566584751533408	0.305933667932647	-5.87953895217581
Q6UXH1-5	CRELD2	-0.357090517910944	3.23983489163502	-1.77166210893086	0.125569555902632	0.440941312655993	-5.88009597865818
P23396-1	RPS3	-0.0728623579172567	3.33440477936845	-2.87840632598134	0.0273109832171544	0.219142021023874	-5.88091935507261
Q96FH0-1	MEF2BNB; BORCS8	0.451054013861215	3.2387959641764	1.58264584597931	0.163332027124712	0.495393654022441	-5.88150878646928
O14813	PHOX2A	-0.111337636869879	3.3419778728326	-2.4131405838918	0.051306261801919	0.294812996631953	-5.88155793805084
Q02083	NAAA	-0.132158750924566	3.3103955726695	-1.01577677226603	0.347976128493754	0.703174685178495	-5.8816267681542
Q5JTD0-2	TJAP1	0.0999894379806692	3.36488534124162	2.16339731095777	0.0725727929689165	0.343145880657545	-5.88237288064619
Q9NZ01-1	TECR	-0.30241683793198	3.34729119861229	-1.80834021064236	0.119293440258524	0.430610091148786	-5.8826068432866
Q8IYR6-1	TMEFF1; MSANTD3-TMEFF1	0.243087848536008	3.39792885446008	0.935215415733464	0.384889643797518	0.728875244048438	-5.88281924769419
P29084	GTF2E2	0.0984877674691318	3.31355634687705	2.14528378484117	0.0744319056283326	0.347604189820635	-5.88293977827914
Q9UF56-1	FBXL17	0.0375558259900064	3.32039807702567	0.16837457296506	0.871683835896454	0.981756371205279	-5.88607256971149
P09038-4	FGF2	-0.133534818429994	3.3388399245038	-1.10457596750269	0.310628622330912	0.673948803230654	-5.88608321066451
P07101-1	TH	-0.0739658431826209	3.30748436048933	-1.84234160681153	0.113750912228313	0.420850894759897	-5.88700454958783
Q9P2H3-3	TRIM59; IFT80	0.116530190298587	3.3230634062862	1.68255767968747	0.142185729837606	0.468360073703027	-5.88754255500292
O95639	CPSF4	-0.0861172069178167	3.35138218585705	-2.10376303195912	0.0788791232678859	0.357620036903842	-5.88879631890069
Q9Y2D8	SSX2IP	0.114472632513629	3.36083510906118	1.67210464193043	0.144268974200336	0.471667007143432	-5.89056322830168
P49750-4	YLPM1	-0.0518254503677045	3.30689022586913	-2.80232242270894	0.030224946423842	0.226771714490192	-5.89241132480099
Q8WVM8	SCFD1	-0.101238975059606	3.28581163922055	-2.2845401003777	0.0613047835064316	0.316069267424049	-5.8939065115486
Q9UHV7	MED13	0.141900429310907	3.35372978977145	1.92605302095908	0.101166688287886	0.398054103397953	-5.89456130239804
O95067	CCNB2	0.106926490929552	3.37299364961122	2.1727424627692	0.0716322841357833	0.341348722410916	-5.89486879970209
P04062	GBA	-0.177321398552899	3.32395837929622	-2.28369581240419	0.0613767307849199	0.316069267424049	-5.89729610365586
Q96QE3-1	ATAD5	0.225043227735699	3.38355579449602	1.62297036225873	0.154459590844887	0.484919394498505	-5.89734768561172
P35232	PHB	-0.205174104611824	3.30899243668845	-2.54428234901599	0.0428501786523424	0.265829812009902	-5.89817548457808
O94874-1	UFL1	-0.0748321604893619	3.3143054728833	-2.4751384447086	0.0471091086290885	0.2813281079506	-5.90068906400159
Q99598	TSNAX	-0.0514724464146272	3.30515351597701	-2.43781709552946	0.0495906211870012	0.290638899703006	-5.90081882289851
Q969M7-2	UBE2F	-0.0889650081703826	3.31630362031384	-1.79399146512133	0.121711250364367	0.434717623883646	-5.90180248252421
Q9NV31	IMP3	-0.0958529855110915	3.33309098729581	-1.9566677648634	0.0969189217605335	0.391228141878279	-5.90396216882888
Q9Y3Z3	SAMHD1	0.0681728304879979	3.33937691287848	2.39189105479068	0.052833345814774	0.2976710765918	-5.9055319322422
Q86UE8-2	TLK2	0.150684567121398	3.36248695791534	2.15295418969659	0.0736387671811877	0.346207246739	-5.90639307137232
Q49AG3	ZBED5	0.116268169402869	3.39399366683981	1.33510289995687	0.229084294823412	0.583155309770845	-5.90673027271725
O75379-1	VAMP4	-0.118036736229548	3.34867464594931	-0.79128163299852	0.458168921898086	0.789554467380158	-5.90929639404817
Q15599	SLC9A3R2	-0.126022012678833	3.33270487852961	-1.77121790520275	0.125647510221279	0.440983927963631	-5.91119117476721
Q9UJ70-2	NAGK	-0.103838134103034	3.27608000655519	-2.18937596313671	0.0699890418069618	0.337149370893749	-5.91251878476229
Q8IX18	DHX40	0.127929467388757	3.34479356236099	2.25217318912862	0.0641264015004779	0.323773089716052	-5.91386971769512
Q86SZ2	TRAPPC6B	-0.0729603885172684	3.33169628718505	-2.05120935425332	0.0848980352953972	0.369116744385791	-5.91399174069028
Q14168-4	MPP2	-0.134301244713044	3.34656249343056	-2.14075197658045	0.0749046020377292	0.348445483454363	-5.9141680543934
P17544	ATF7	0.0943800001896492	3.35877969986824	1.82979729564939	0.115765598151344	0.424769719394306	-5.91563649388579
P78346-2	RPP30	0.106888875000804	3.34117892596883	1.9069944330006	0.103904334670787	0.403103093395641	-5.91701159642761
Q9BRT6	LLPH	0.148640260456244	3.35544191039063	1.77268920304217	0.125389489604065	0.440771028513764	-5.91809573148868
P10643	C7	-0.211378788560128	3.3193314597292	-1.67529465051113	0.143630127527134	0.470573033951979	-5.91834385492741
P68106	FKBP1B	-0.124516114128633	3.30643429728649	-0.642103222467318	0.543958123729174	0.848160482271665	-5.91933081024505
Q495W5-1	FUT11	-0.170899530470876	3.31576273041371	-1.66526734235336	0.145647453643875	0.472915562331852	-5.91956205468222
O95905-3	ECD	0.0951785730892094	3.32509828260991	2.1887870515204	0.0700465558632983	0.337149370893749	-5.91979351252658
Q8TAD4-1	SLC30A5	-0.152274609299776	3.31026966774683	-1.44686534427223	0.196856822123895	0.540549470586105	-5.92112381408585
P17405-1	SMPD1	-0.112764175029628	3.32155189963703	-1.38815067862691	0.213235025845873	0.560264577712687	-5.9211858194993
P35790	CHKA	0.0909256763377145	3.36784776423941	1.79214930533903	0.122025118385192	0.435339879222995	-5.9215615739254
Q92575	UBXN4	-0.162884044461887	3.31119403511376	-1.55162317144436	0.170483697895665	0.506312400665316	-5.92165110630387
Q8NB49-1	ATP11C	-0.0891788251110112	3.34058753929817	-1.80761823061958	0.119413962590216	0.430610091148786	-5.9225536593135
Q9H920	RNF121	-0.122062207707884	3.27911812789728	-1.16073881009438	0.28876535875308	0.65101344767324	-5.9237866841621
O75446	SAP30	0.0825422740963922	3.34782084170075	1.84259117085677	0.113711183533183	0.420850894759897	-5.92554583329621
Q8WTS6	SETD7	0.074717820189906	3.34689523325482	1.97694081388143	0.0942047322996477	0.387697608358501	-5.92657803923333
Q9Y2G5	POFUT2	-0.22157141240517	3.31967569247093	-1.80030779598775	0.120641064907328	0.433396812028151	-5.92680071393859
P49336	CDK8	0.080805838340961	3.31917886284983	1.95708597969521	0.0968621467508855	0.391228141878279	-5.9271407050093
Q9UQ35	SRRM2	0.0858729291275999	3.34555667187476	2.78263200902123	0.0310321702851177	0.227478709967493	-5.92896127195323
Q8NCH0	CHST14	-0.112879310830903	3.33568689584283	-1.08890262139004	0.316970468248973	0.679855387193632	-5.9299722161302
Q5T160	RARS2	0.233457371009196	3.24588215380194	0.980489658953148	0.363785596975994	0.714979026030848	-5.93002425524228
Q9UNW1	MINPP1	-0.281403461102516	3.29895306835116	-1.91159844747872	0.103236313739466	0.402141454682805	-5.93035753204548
Q96TC7	FAM82A2; RMDN3	-0.169873484696459	3.33357787685742	-2.1928721699386	0.0696485928571168	0.337149370893749	-5.93323519608482
Q14527	HLTF	0.107616605673422	3.33052941804957	2.30937787130569	0.0592268012781644	0.312175553353281	-5.9352017175936
Q96MW1	CCDC43	0.11128635480633	3.31636810388866	2.01794088562718	0.0889465728625553	0.37765655144431	-5.93712539639899
Q8N344	MIER2	-0.113506058128926	3.34151337180387	-1.38835855259436	0.213174915318885	0.560264577712687	-5.93758386765292
Q9BRF8-1	CPPED1	-0.0896027512673768	3.32991916402079	-1.77475940298239	0.125027315867124	0.440548859734676	-5.9380872298771
Q969X0	RILPL2	0.105861192219713	3.35120478119623	1.37609151247265	0.216748529983069	0.564753203157	-5.94287239911672
Q9C0B5	ZDHHC5	-0.177659273584106	3.35858195359427	-1.45841767770423	0.193773274006983	0.535924070489272	-5.94411541623628
Q147X3	NAA30	-0.105307125357255	3.32000260505025	-1.29745418172807	0.240963956534345	0.597504999548524	-5.94666750026539
Q6ZT12-4	UBR3	-0.0991137099062328	3.31777078699815	-1.51038660843908	0.180445937987558	0.520121719010169	-5.94808238120374
Q9UKV0-7	HDAC9	-0.11640927645111	3.35306086410236	-0.8176764894905	0.444025074878606	0.77574133029639	-5.94954560527915
Q96S66	CLCC1	-0.185633886112846	3.32108027937015	-1.5144284383957	0.179445948488839	0.517781160583643	-5.94975807630742
Q9UK23	NAGPA	-0.139015801120578	3.29093168412568	-1.12828751632836	0.30123482580232	0.663418333249338	-5.94987965187183
O00764-1	PDXK	-0.092781457179686	3.30387451751502	-1.81488053070831	0.118207072052181	0.429960576954189	-5.95071306914468
Q9Y2M0	FAN1	0.127285807519209	3.3486429079398	1.07716523516952	0.321789342395488	0.681627756575962	-5.95247523512614
Q9P0T7	TMEM9	-0.137040418698258	3.35253434439253	-0.887020571058712	0.408376201393332	0.751888032243838	-5.95337701633048
O94832	MYO1D	-0.0992971681107534	3.3555086185524	-1.42451911167159	0.202949708527684	0.549621280167939	-5.95340728789921
P09017	HOXC4	0.113906499484788	3.38971314893619	1.20059905668377	0.274050241693892	0.638714569156979	-5.95422572923203
Q9BSJ8-2	ESYT1	-0.102324072497389	3.31960502797745	-2.21098707885107	0.0679116543324746	0.33228235668355	-5.95522081558316
Q13506-1	NAB1	0.115682959752891	3.35658810706266	1.8716117979555	0.109183559565383	0.412361808956069	-5.95557453987365
Q93045-2	STMN2	-0.121997925950647	3.26470995709603	-1.5387886347913	0.173527757352318	0.511325424383995	-5.95606640363978
P35249	RFC4	0.118802460686314	3.34349672658558	2.20165914056822	0.0688004312480113	0.334515884877849	-5.95672598797483
Q9UMN6	KMT2B; MLL4	-0.0787663471234409	3.31449311476394	-1.9259800237844	0.101177035535331	0.398054103397953	-5.95757102788611
Q9H977	WDR54	-0.0863947289965053	3.2881348855699	-1.93015554335943	0.100586854718488	0.397599956704349	-5.95915016488391
Q9H0G5	NSRP1	0.0804053567785425	3.37816888329457	2.07047743015254	0.0826389875924566	0.365225077090672	-5.95949943090912
Q99581	FEV	0.130410321198559	3.40500063030449	1.40329363263112	0.208896182515521	0.555780779833095	-5.96139472304718
Q13948-2	CUX1	-0.114581033798947	3.35096083945706	-1.09424048107346	0.314798722347175	0.677645025686338	-5.96154906262754
P49674	CSNK1E; LOC400927-CSNK1E	0.0948929411176807	3.34165474140857	2.0642921282362	0.0833574565243738	0.36661824144077	-5.96362361931706
P21796	VDAC1	-0.324469406218424	3.2424481958519	-2.24009241387112	0.0652136187567237	0.326799734981338	-5.9641256203118
P25391	LAMA1	-0.104396725362659	3.32963064039718	-1.16660986831974	0.286556624703323	0.650714618466569	-5.96522072675581
O95926	SYF2	0.138357010100358	3.40816223405914	2.11697328230013	0.0774355604423139	0.354142153558705	-5.96572278326999
O15068	MCF2L	-0.107990939058673	3.32468575517528	-0.631618497914117	0.550352399061994	0.851978066939778	-5.96618979750374
O00505	KPNA3	0.121795781697611	3.36036592715874	1.85433428979574	0.111857169239886	0.416862869104997	-5.96680679784554
Q9NYB0	TERF2IP	0.086902565743046	3.36755517119197	2.43585164291161	0.0497250435925683	0.290638899703006	-5.9671328627936
Q8N2Y8	RUSC2	0.113604227688277	3.36247515583414	1.17520960742347	0.283347240862277	0.648369710989501	-5.9682459991504
Q9BT78	COPS4	-0.0515720733467885	3.29640210833932	-2.49228592475487	0.0460129821022352	0.277986456343531	-5.96947170255778
Q01850	CDR2; LOC101060399	0.173923425952967	3.39402106250914	1.76618820951553	0.126533484894797	0.441891807654401	-5.96960756652883
Q5TC82-1	RC3H1	-0.0664527972237803	3.33445609758667	-1.97893898618337	0.093941374640748	0.387271269801843	-5.97198644924461
O43402	EMC8	-0.080531360432012	3.32572299349081	-2.12019216506984	0.0770879088557146	0.353129386117848	-5.97269587698157
P78560	CRADD	-0.105089816242096	3.30906928735657	-1.27956011500916	0.246799209903421	0.60566459427154	-5.97287344552832
Q15493-1	RGN	-0.21275240312984	3.2926658588626	-1.79582154745509	0.121400223191873	0.434266681999759	-5.97415075007618
Q96L91	EP400	0.0567935825603836	3.31135569816326	2.38425423020046	0.0533936867891243	0.298743027859019	-5.97521963057254
Q58A45	PAN3	-0.0843320756789445	3.3251482594554	-1.50681397280555	0.181334165644156	0.520539378670027	-5.97793949482046
Q8N6N7	ACBD7	0.205589611954025	3.21827655020766	1.46566042955578	0.191862794865131	0.533947425306609	-5.97830148962601
Q9NPL8	TIMMDC1	-0.273046709787514	3.20124183699111	-1.24859383029734	0.2571911421535	0.618292304423556	-5.97885725404336
Q6ZN18-1	AEBP2	0.0981378602313075	3.40718588591026	1.33280233451785	0.229794960750534	0.584079262151311	-5.9794037829358
Q13217	DNAJC3	-0.369787118154557	3.30534228300412	-2.02268966050825	0.0883569659821608	0.37682474352672	-5.98028535227953
Q99956	DUSP9	-0.154430860423803	3.26429654936981	-1.18444897018078	0.279933300462887	0.644996130589613	-5.98116316333853
Q8IZ69	TRMT2A	0.0691643140634327	3.34553204415036	2.14375936290282	0.074590571490897	0.347777890736959	-5.98125393605698
Q92613	PHF16; JADE3	0.0650573630841395	3.34099256483974	2.20539632062474	0.0684429220584377	0.333327606135002	-5.98145541982252
Q96DX4	RSPRY1	-0.116709348710937	3.36889341914708	-1.16661584250094	0.286554384492669	0.650714618466569	-5.98241558943167
Q8IYD1	GSPT2	-0.0737960206735485	3.36317771117516	-2.01458660427713	0.0893654286166403	0.378475582636846	-5.98273390488717
Q9Y5A9-1	YTHDF2	-0.0628339128225262	3.31584666258727	-2.44092717848672	0.0493786913849226	0.289699853133959	-5.98307114559936
Q8TC05	MDM1	0.12650531299682	3.34887566307883	1.2149510861661	0.268911547888319	0.632621970102435	-5.98490956400781
A8MVW0	FAM171A2	-0.13485548688017	3.34284119296028	-1.15926602460907	0.289321688907044	0.651190615109407	-5.98664021641958
Q9Y450-2	HBS1L	0.0872139905088073	3.36278991799527	1.48708999096464	0.186311582617093	0.527148481222349	-5.99028189649429
O00116	AGPS	-0.171276855912359	3.2806785543922	-2.32642771631473	0.0578427423568379	0.309789267618556	-5.99043909972299
Q9UI15	TAGLN3	-0.0982163530949752	3.30246170011081	-1.95299420651757	0.0974190612178082	0.391781338631041	-5.990801135151
Q9NX55-2	HYPK	0.111569840139268	3.32011581334467	1.67815115992888	0.143060377813278	0.470085596541913	-5.99110369767848
P61313-1	RPL15	0.102712715522521	3.30940303492839	2.2563311767108	0.0637565402291172	0.322148431021935	-5.99131131619937
Q9UQB3-1	CTNND2	-0.140499029460207	3.28746012284693	-1.76630722113932	0.126512450904983	0.441891807654401	-5.99312565256638
Q9H609	ZNF576	0.117046746002187	3.42141825126847	0.668767311619589	0.527907854385319	0.837218443635114	-5.9955570064428
Q9BVN2	RUSC1	-0.124626469760864	3.32703432241202	-0.845258209962634	0.429583374478405	0.765668377073159	-5.996045578996
Q5JS54-2	PSMG4	-0.108034428797453	3.28820856535092	-1.72370270034502	0.134263960998492	0.453042138946075	-5.99621043583786
Q9BSY4-2	CHCHD5	0.284401013405233	3.19681747357931	1.64141708123739	0.150555487216735	0.478747871073624	-5.99715113818558
P22307-1	SCP2	-0.0877269566645214	3.31228776760665	-2.18887904776471	0.0700375681674824	0.337149370893749	-5.99913203630036
O75486-1	SUPT3H	-0.0923511861903865	3.31684161480182	-1.33251733577473	0.229883136461643	0.584079262151311	-5.99940959751183
Q8WV44-1	TRIM41	-0.0848627997617716	3.34435239359733	-1.50682191532832	0.181332186467526	0.520539378670027	-6.00025424899081
Q9Y5Y0	FLVCR1	-0.126594929671364	3.40382852751353	-1.18017540221045	0.281507996669898	0.646798643187432	-6.00083139975819
Q9Y2Q5-2	LAMTOR2	-0.18119055941407	3.33252731606281	-1.88092731329074	0.107768378211946	0.410254621602295	-6.00138072483005
Q9Y6M5	SLC30A1	-0.0977927470060316	3.37413853348533	-1.25031607624533	0.256603285783839	0.617663080121646	-6.00238575874404
Q9BZL6	PRKD2	0.0914348317104081	3.33701392152163	1.49722592104137	0.183738102399584	0.523626238229356	-6.00288820337127
Q9BT40	INPP5K	-0.114774339954639	3.32009116197379	-2.04615560489151	0.0855008338264787	0.369904426349846	-6.00606323973348
Q5BKZ1	ZNF326	-0.0707230136647118	3.31441444685667	-2.37820232987905	0.0538421367495851	0.29912298194214	-6.00830292517049
O14647	CHD2	0.139679269719679	3.33507695899849	1.94054611322022	0.0991330883813013	0.394647470085989	-6.00941017017353
Q9Y4L1	HYOU1	-0.312723076345336	3.30190708174941	-2.538462766316	0.0431924979742594	0.266964701501419	-6.01001094814415
Q86XI2-1	NCAPG2	0.09438918230548	3.30955580804439	2.1621224800561	0.072702069974327	0.343300829828452	-6.01018715805988
P19793	RXRA	0.103657826733206	3.34507514949511	1.72033936819815	0.134895158973597	0.453829895702266	-6.01107147371709
P32929	CTH	-0.0949500209951211	3.31741687166467	-1.71743027420199	0.135443427204214	0.453962462365301	-6.01264972171094
O75391	SPAG7	0.0970562632754916	3.31885657646937	2.31166982969436	0.0590387653417314	0.312175553353281	-6.01296579240694
Q8N9N8	EIF1AD	0.15093047923033	3.34974827867759	2.09857772249886	0.0794532110905393	0.358766763211182	-6.01383405400618
Q8NDD1	C1orf131	0.0978498071877503	3.36234530192847	1.48013343844473	0.1880971314527	0.530284558570666	-6.01461004167933
O15131	KPNA5	0.0915943106105802	3.31436465936015	0.507687034317381	0.629342548233786	0.894752325955971	-6.01470473521097
Q96G21	IMP4	-0.173113511856732	3.33321739484349	-1.55404921204172	0.169913961900584	0.505068120999962	-6.01694131457175
Q8IYU8	EFHA1; MICU2	-0.132673844711111	3.32970489593596	-1.60333955541559	0.158720140273736	0.491376608357648	-6.01730181464208
P07686	HEXB	-0.142420033996174	3.33564707272542	-2.13022906362825	0.0760140658342971	0.350843693441886	-6.018453881708
Q587I9	SFT2D3	-0.148383287464936	3.34363695165405	-0.950490319500691	0.377665899272316	0.725031955623071	-6.01862302814427
O96006	ZBED1	0.104944387655323	3.34901906563923	1.41521585195276	0.205536816262766	0.551881403603635	-6.01948518602505
Q9Y277	VDAC3	-0.389234774762766	3.23812615815264	-2.06199068354153	0.0836263994471571	0.36661824144077	-6.01970680864812
Q9BQI0	AIF1L	0.0889193404476767	3.33249596943832	1.66933756013988	0.144825334143811	0.471950262044522	-6.02260350535599
P11908-2	PRPS2	-0.108414222347623	3.30706006762477	-1.95523532203729	0.0971136364481621	0.391492998918584	-6.02281980368333
Q9H553-1	ALG2	-0.134791026105229	3.30062777703337	-1.59744855144438	0.160020312292593	0.492483276233519	-6.02364613546714
Q6BDS2	UHRF1BP1	-0.0687965088937934	3.31603224773861	-2.0001604062234	0.0911896241772075	0.382095360842583	-6.02572501047843
P33552	CKS2	0.154254204900165	3.21136955474146	1.60611993095488	0.158109986842888	0.490206807888638	-6.02595104503646
Q9H8M5-1	CNNM2	-0.0956084733372307	3.36175411740437	-1.07377755346349	0.323191318550551	0.68287033563188	-6.02634747743368
O00159-1	MYO1C	-0.161157514048504	3.3116623588501	-2.06725052401854	0.0830130302749633	0.366125459330868	-6.02688425084958
Q9Y483	MTF2	0.0766318688066021	3.35363546517308	2.07192031301022	0.0824722909344905	0.364998846376848	-6.02699665966097
P35268	RPL22	-0.0688252982933705	3.22746288313527	-2.19166220097788	0.0697662228957223	0.337149370893749	-6.02773086832722
Q6Y288	B3GALTL; B3GLCT	-0.275424777790521	3.30223986924343	-1.90555680492534	0.104113807563476	0.403682008492645	-6.02838980890871
Q6NZY4	ZCCHC8	0.0685704341953317	3.34790828278627	2.34125736575573	0.0566662211797635	0.305933667932647	-6.02877727278121
Q8NHP8	PLBD2	-0.0928274632502989	3.30741585111403	-1.95560732086132	0.0970630323345462	0.391492998918584	-6.02932547150063
Q9NZW5	MPP6	-0.131196258731715	3.33195174835574	-2.28262161615493	0.0614683963363487	0.316069267424049	-6.03093029974676
P80303	NUCB2	-0.0889849989643083	3.32229948343609	-1.96206651669191	0.0961885649277855	0.390632793225242	-6.03167481236512
P51809	VAMP7	-0.115079849315552	3.33454677070341	-1.64497682457943	0.149813022736413	0.477747383309837	-6.03205016783395
P15822-1	HIVEP1	0.130933660276656	3.3671992556505	1.09247018366733	0.315517614649568	0.678641418347386	-6.03282913529912
P33992	MCM5	0.103942256990676	3.33292696735717	2.63500562555933	0.0378687613930405	0.249007891510023	-6.03367186333368
Q8NG68	TTL	-0.0669049959790742	3.32965776915383	-2.01139151818872	0.0897662536467369	0.378992210091445	-6.03496977196067
Q13158	FADD	-0.12078408846653	3.3537725571674	-1.55362447694124	0.170013578073593	0.505140121105574	-6.03530063905133
P26373-1	RPL13	0.177618617062819	3.2870397712679	2.28502986432953	0.0612630875240588	0.316069267424049	-6.0358826832234
Q13387-1	MAPK8IP2	0.0875711285560972	3.32874129250666	0.624257068245968	0.55486962593801	0.85561024022662	-6.03668274438238
O75586	MED6	0.103790845219486	3.3637087991675	1.58322353936813	0.163201576151383	0.495222174010084	-6.03763020921892
P54098	POLG	0.139444934475442	3.26446310649492	0.865012371266859	0.419453037078155	0.759344865826435	-6.03785723889946
P35658-5	NUP214	-0.0502138426896401	3.32119494498831	-2.58805884548262	0.0403651773399033	0.258059816963122	-6.03831487659208
Q9UBS4	DNAJB11	-0.349665125753012	3.2860579593116	-2.19806380333716	0.0691461817030098	0.335543783233795	-6.03849752525885
Q8N0W4-2	NLGN4X	-0.105562307616381	3.31486386741045	-1.71202576704179	0.136467730065497	0.45671018553388	-6.03901714352044
Q5SRD1	TIMM23B; LINC00843; LOC100652748	-0.213014961361038	3.26051122626561	-0.94461012026486	0.380434230052631	0.726339486597029	-6.03957729541476
Q9HB40	SCPEP1	-0.0936148094521578	3.32198535697443	-1.99377677110255	0.0920087520536855	0.38456558874591	-6.04022772981451
Q8IV50	LYSMD2	-0.0846682591792433	3.29905105808716	-0.551829921818256	0.600505738879482	0.879728357454908	-6.04182643027602
Q5JWR5	DOPEY1	-0.0416182809540443	3.33988818274903	-0.262294774646741	0.801649854284017	0.963763506854999	-6.04292432917114
Q9Y6I3	EPN1	-0.0682896939285945	3.30661836285207	-1.81369196825628	0.118403771032849	0.430399231170455	-6.04337991647281
Q12981	BNIP1	-0.119249037249139	3.28547643502475	-0.716129349352621	0.500158706589468	0.81955795660764	-6.04354950349906
O14686-3	KMT2D; MLL2	0.0621020925056579	3.33288157260039	2.30514660441332	0.0595755740547827	0.312328909363884	-6.04391799578525
O94880-2	PHF14	0.162023148304361	3.36578553145648	1.42266370311771	0.20346328493861	0.550122683248056	-6.04442437838247
Q9Y512	SAMM50	-0.257174905479723	3.26418207635946	-1.7183295068957	0.135273721514987	0.453847738683231	-6.04466244756718
Q12788	TBL3	-0.158638794182737	3.29179456864187	-2.30719406557117	0.0594065418694677	0.312175553353281	-6.04493889198921
Q9H668	OBFC1; STN1	0.103501608736917	3.32280965990721	0.779999677094986	0.464310656520362	0.793996610609926	-6.04512940782026
Q9H4W6-2	EBF3	0.0742794856676268	3.33662118023821	1.7768917990525	0.12465532949167	0.440265694403633	-6.04563105057781
P20929-2	NEB	0.0947893544944655	3.28465184431206	1.2207353719962	0.266864107377054	0.631075289641599	-6.04737783580502
P0CG12	CHTF8	-0.110465027875876	3.35457793089194	-1.50890037900163	0.180814950437546	0.520386670073694	-6.05193239590469
Q8N2W9	PIAS4	0.106950225861519	3.35596333715938	1.19434930593332	0.276314178188309	0.640505686070647	-6.05216834444563
Q9UHY8-1	FEZ2	0.0804650809014183	3.3127362846823	1.49581185063913	0.184095138221595	0.523752622541269	-6.05341501621741
P80723	BASP1	-0.17099320909716	3.41292934015672	-2.28280248049594	0.0614529525343099	0.316069267424049	-6.05416406166143
Q9P2W1	PSMC3IP	0.101208221562137	3.3461622761839	2.01940112901664	0.0887648481797772	0.377602846225084	-6.05462793439022
Q9NUD5	ZCCHC3	-0.0712797555026655	3.32112852452875	-2.12049070502411	0.0770557461062204	0.353129386117848	-6.05486198266894
Q15464	SHB	0.0973678706903384	3.35824023961066	1.01256275829405	0.349393055359784	0.704675939467355	-6.0568957406047
Q86TI0	TBC1D1	0.138987158996978	3.32933179550151	0.922669528050913	0.39090191649074	0.734888879385918	-6.05695648903253
Q8NFQ8	TOR1AIP2	-0.13202179852238	3.36086486703599	-1.13165429139869	0.299920452867222	0.662316095652732	-6.05746794774526
P84098	RPL19	0.125698212595779	3.27648504784521	2.22515830557205	0.066583930532171	0.329477351968645	-6.05877449097779
Q13795	ARFRP1	-0.144508582217563	3.3087364279466	-1.68955889503031	0.140806640350716	0.46610893791986	-6.06012704623951
P41743	PRKCI	-0.060847822380357	3.32464137144714	-2.16040406004319	0.0728767031011893	0.343371245272833	-6.06077671937204
Q9H488-1	POFUT1	-0.330923982204283	3.28754940717415	-1.96155764566153	0.0962571703904287	0.390632793225242	-6.06093484493323
Q96IK1	BOD1	0.268587093596228	3.24428371002609	1.84847452238894	0.112778554026337	0.419320927844871	-6.06225451435291
O60281-1	ZNF292	0.184104053645668	3.37363146100551	1.4737401946884	0.189752053674044	0.532163566185055	-6.06317129089539
O15321-1	TM9SF1	-0.103716535262888	3.32504939526252	-1.53807705926929	0.173698009835518	0.511325424383995	-6.0670167173994
O43719	HTATSF1	0.121638074277255	3.34585701560597	2.52766809313956	0.0438351175259841	0.270188856875891	-6.06722328610442
Q9HBH1	PDF	-0.0412158600094804	3.26953605036194	-0.221021063652178	0.832223806264005	0.971771633250534	-6.06745485972973
P05198	EIF2S1	-0.064528112947759	3.32114783910152	-2.50692238743648	0.0450985742451177	0.274059108593875	-6.06919493048094
P62380	TBPL1	0.109407441033043	3.34896141678699	1.53825210006701	0.173656114833073	0.511325424383995	-6.07026008044301
Q6ZV89-1	SH2D5	0.0805607643751457	3.34716482062636	0.618120757119099	0.55865246937679	0.85767522743255	-6.07038254602386
Q7Z7K0	CMC1	-0.162295985365073	3.33350171219112	-1.41331232481102	0.206069855899832	0.551881403603635	-6.07199131525367
Q9BV73-1	CEP250	0.0787489141392467	3.35735663522931	2.36683757873696	0.0546949125165051	0.300395368314768	-6.07209300979723
Q96DI7	SNRNP40	-0.0432425428851998	3.31441378574886	-2.28514313939319	0.061253448046664	0.316069267424049	-6.07257857911779
Q9NZU5	LMCD1	0.0926657699437899	3.35791626356071	1.75741596954304	0.128093306275529	0.444652325913729	-6.07371513329815
Q92786	PROX1	0.108060719457285	3.39812150439568	1.58161403757179	0.163565268736969	0.495876606578141	-6.074603466063
O43542	XRCC3	0.0943551048620774	3.37839732799109	1.45953581192637	0.193477194423289	0.535881439700718	-6.07465792279897
Q9BYB4-1	GNB1L	-0.0706863866713876	3.33448211349381	-1.74930888543024	0.129551500096438	0.446676645404556	-6.07604871851266
O60336	MAPKBP1	0.108760271289543	3.31699915368848	1.21581589907797	0.268604574151667	0.632201228819295	-6.07609984013892
Q92544	TM9SF4	-0.120473062989908	3.31131597140951	-1.9530358662522	0.0974133749683941	0.391781338631041	-6.0766083595372
P22304	IDS	-0.149798607693377	3.33498669523041	-1.18747768022741	0.278821860512842	0.643730691053081	-6.07799378302489
Q96NL6-1	SCLT1	-0.0854287999510808	3.34181003740169	-1.87740472934485	0.108301367354509	0.411212332650749	-6.07901084848239
Q7Z309-2	FAM122B	-0.0615666399069642	3.26326695679699	-0.437829969769467	0.676452180973433	0.919876113765374	-6.08429791454221
Q9BY89-1	KIAA1671	-0.0754875017525416	3.32474225950822	-1.91175828884736	0.103213198435817	0.402141454682805	-6.08477188051379
O94910	LPHN1; ADGRL1	-0.172388278894136	3.32632463891536	-1.20708644729364	0.271717085584646	0.635807068382032	-6.08717167251659
Q9BVP2	GNL3	0.0810448841427589	3.34424479556658	2.31107057445873	0.0590878693593787	0.312175553353281	-6.08755523646552
Q9BRJ7-1	NUDT16L1	-0.123700244332118	3.2998301382516	-1.70859089994768	0.137122622414691	0.45756528021634	-6.08808896946989
Q9NVT9	ARMC1	-0.0736176937365327	3.31677756294114	-1.96884703350827	0.0952790840354984	0.389487408808932	-6.08819537491789
Q14315	FLNC	-0.0791152976023668	3.29886595049183	-2.88376271383624	0.0271175214659436	0.218374271420459	-6.08826697530948
Q9P2T1-1	GMPR2	-0.0473937150193371	3.31744656852799	-2.13801183761399	0.0751919020917191	0.348882094192879	-6.09125049175068
Q7Z6B7-1	SRGAP1	0.0950297855229182	3.38498338483118	1.56746769736912	0.166794960093413	0.500284113043545	-6.0917688545454
P15880	RPS2	0.072796683652281	3.28979443900547	2.48689736031911	0.0463545216465132	0.278542865499228	-6.09190266640742
P49005	POLD2	0.0731417903603999	3.33540159364862	1.98836293919275	0.0927092324947653	0.385808607276352	-6.09242249170849
Q9UIU6	SIX4	-0.0811447880250954	3.36265302788738	-0.613208310336246	0.561692184027534	0.858188702850825	-6.09315359267686
Q9H0P0-4	NT5C3; NT5C3A	-0.0974646606815396	3.33661876207246	-1.98354526487825	0.0933370821664904	0.386894260921554	-6.09355703043986
Q52MB2	C12orf68; CCDC184	-0.0788671154925245	3.43930476664535	-0.476691729826027	0.650029172412955	0.908514075237066	-6.09386555296516
P16930	FAH	-0.0813976237930669	3.33263196886662	-1.70926053867999	0.136994710970276	0.45756528021634	-6.09400466255064
P42025	ACTR1B	-0.119250459622371	3.30741405408273	-1.53484311705736	0.174473741192076	0.512452936214023	-6.09419245853358
Q96FK6	WDR89	-0.106249537524878	3.33534314719916	-1.98121636464914	0.0936421186515752	0.387049539659199	-6.094678215661
O60888-3	CUTA	0.448250023605228	3.275998541451	2.01039233711626	0.0898919727579738	0.379069338404799	-6.09513180270664
Q3MIT2	PUS10	-0.0648084855581146	3.32360912303738	-1.77342564833168	0.125260533999188	0.440548859734676	-6.09526456001736
Q14997	PSME4	0.0771967068156984	3.32677439174378	2.15114487697646	0.0738250726170487	0.346378141830691	-6.09671538216003
Q96K58-2	ZNF668	0.147107592592628	3.36292305428622	1.18832969651484	0.278509878231894	0.643232052448704	-6.09702682373394
Q96P53	WDFY2	0.086169818442202	3.35449134667638	1.39655342470327	0.210817426755125	0.556970330938224	-6.09838334245353
O95758-4	PTBP3	-0.0969666452459216	3.24191641269448	-1.50368403263683	0.18211567480075	0.521888375177512	-6.09858613278643
Q4G0X4	KCTD21	-0.0797732200703089	3.32207940528065	-0.495056412491888	0.637729709736094	0.900482414168984	-6.09859550764708
O95232-1	LUC7L3	0.0749489283180557	3.35022165389202	2.54826132801088	0.0426177750274986	0.265779699331328	-6.09905157828222
Q7L7V1-1	DHX32	0.102368651940595	3.33666431529496	0.96895853242196	0.369072890849853	0.718624925514099	-6.10052442865651
Q9UMX3	BOK	-0.102308392580266	3.3389235001272	-1.16653039488845	0.286586427226784	0.650714618466569	-6.10269422213053
Q9Y2Y1	POLR3K	0.0924877859462757	3.33743492249668	1.75435090650486	0.128642720208518	0.44558565497527	-6.10519651282597
Q96A73-1	KIAA1191	-0.105693658994195	3.32849787620425	-1.33173169495593	0.230126362218592	0.584265585649577	-6.10702271307465
Q96EU6	RRP36	0.243636912831372	3.30752507383782	2.00057201826447	0.0911370598425607	0.382095360842583	-6.10734171794149
Q96HA1-1	POM121	-0.223412999787791	3.30440442711498	-1.24211904531699	0.259411700740839	0.621400927766759	-6.10792933383002
Q53T94	TAF1B	0.0878889967729635	3.37297374701306	1.59463454201921	0.160644935936205	0.493471270419413	-6.10897855429892
P62166	NCS1	-0.221532012456194	3.300116359343	-1.74828818311206	0.129736231635413	0.446676645404556	-6.10984968144196
Q6DN90-1	IQSEC1	-0.0562126138497464	3.32817780079008	-2.0065342607971	0.0903790707273233	0.380125407327725	-6.11011644962685
O75781	PALM	-0.0978948712644676	3.35828570329336	-1.67113495570688	0.144463708880816	0.471667007143432	-6.11093742012223
Q96P50	ACAP3	-0.118679864960749	3.26285684817906	-0.970977325095033	0.368142904053793	0.717618419607332	-6.11376648534267
P50749	RASSF2	-0.0804926322316297	3.33627953496171	-1.74301747592253	0.130694233958525	0.448846371343288	-6.11465301772724
P06858	LPL	-0.19574534833618	3.29051692622994	-1.35524871785198	0.222944612233813	0.574287463622459	-6.11498092709224
Q53H12	AGK	-0.225382731604472	3.26377232663506	-1.61257087187505	0.156702898228142	0.487927190992923	-6.11555938405422
Q96CS4	ZNF689	-0.00181104488563963	3.40154359103392	-0.00863740294333094	0.993381515151713	0.998780550269699	-6.11616792538834
Q9Y6M4-2	CSNK1G3	-0.104030400679965	3.36456784751058	-1.76737524498014	0.126323842087618	0.441737861162338	-6.11643750782021
Q16181	SEPT7	-0.0768553768964855	3.28683716074293	-2.55080450868153	0.0424699301431325	0.265437063394578	-6.1169603042391
Q86V88	MDP1	-0.111577640469573	3.29937921564142	-1.30494002702627	0.238559219190811	0.59482423299292	-6.11811055583968
Q9HB96	FANCE	0.114342755148418	3.34073195781878	1.31341489799531	0.235862464336068	0.592515121402267	-6.11863454505834
Q7RTS9-1	DYM	0.0987280378450099	3.30018965005046	1.16966659177759	0.285412348968498	0.650714618466569	-6.11870411920813
O14777	NDC80	0.133867258143306	3.3787735064042	2.42887444087755	0.0502053209301545	0.291992751937531	-6.11888516628637
Q15596	NCOA2	0.0769457618738848	3.34042091240942	1.99067335419753	0.0924096412120148	0.38480086769453	-6.12086827754124
B2RTY4-4	MYO9A	0.0898586983642938	3.3371899243954	1.06812170118741	0.325543116588616	0.685031055635592	-6.1231443271587
Q13487	SNAPC2	0.102977644055344	3.35751288085124	0.916344297364772	0.393960211714009	0.737505844784537	-6.12333556304743
Q8TAP9	MPLKIP	0.0201941258913854	3.34117873032765	0.122712701728638	0.906242372325902	0.988159160206937	-6.12353708236766
Q8N335	GPD1L	0.0647634326099469	3.32790256041302	1.83280431471451	0.115279473835464	0.424364708151767	-6.12487178617072
Q12830-1	BPTF	0.0740194760838573	3.3384524830002	2.32687326278478	0.0578070274497171	0.309789267618556	-6.12697323670566
Q96DT6	ATG4C	-0.0862454332412793	3.32035044377485	-1.36661333930855	0.219546670251093	0.569258007230001	-6.12747989472126
O43164	PJA2	-0.0884776193313288	3.31236210097604	-1.60657714137028	0.158009865501847	0.490123193917765	-6.12943093939119
Q9H0U4	RAB1B	-0.0944987801323994	3.30755444981646	-1.62685375839267	0.153629759797352	0.483930131942763	-6.13004116547324
Q8TCG1	KIAA1524	0.0755780072433018	3.31895455451506	2.19043095462566	0.0698861307473164	0.337149370893749	-6.13170312954015
P48730-1	CSNK1D	0.0993189748216063	3.35939777035332	1.38605078169329	0.213843110797906	0.560762756299794	-6.13237163630731
Q96IJ6	GMPPA	-0.125780355669554	3.30937630897161	-1.79486888015757	0.121562034141717	0.434613462513075	-6.13286534238608
Q8IUH3	RBM45	-0.0783883565033503	3.32197284586491	-1.6965078780179	0.139450591097334	0.462879789188132	-6.13290965379757
Q9BZG1	RAB34	-0.118906647319495	3.32130471947547	-1.42497682512807	0.202823195966615	0.549500773544813	-6.1330389990048
P61353	RPL27	0.0803826415520149	3.31029160992961	2.14930119458946	0.0740154127769094	0.346543162547375	-6.13316317746811
Q8IWB7	WDFY1	-0.0691010414567419	3.34311658373226	-2.06297366633375	0.0835114223615155	0.36661824144077	-6.13361604036668
P51665	PSMD7	-0.0616150777249568	3.29341291505954	-2.25939116052014	0.0634857554263305	0.321507604955718	-6.13376042733692
O00401	WASL; ASB15	0.115304757634479	3.35092098888131	1.89063452164719	0.106313039815978	0.407632505218802	-6.13432944175982
Q9NX38	FAM206A	0.0843868028285557	3.28150558454818	1.30238766662104	0.239376735509074	0.594950359116817	-6.13441511084953
P34896-1	SHMT1	-0.0572647707706699	3.32415684064894	-2.12958053594346	0.0760829882689421	0.350843693441886	-6.13480313896284
Q9NS18-2	GLRX2	-0.0908164190055174	3.29150157081052	-0.919908197684836	0.392234804036727	0.736272602698528	-6.13497919806893
P30039	PBLD	-0.0884301155702533	3.3235038945739	-1.30266648012745	0.23928731146694	0.594950359116817	-6.13614961692712
Q9BZI7-1	UPF3B	0.109327433285277	3.34706165835336	1.9812105525611	0.0936428811623227	0.387049539659199	-6.1363979201281
Q2KJY2-1	KIF26B	0.0999185623277703	3.32562388101789	1.00070005891227	0.354662710135695	0.708315528342617	-6.13643379627438
P13637-3	ATP1A3	-0.0693260826340431	3.35870441952569	-1.81752574444987	0.117770458923568	0.429003617661631	-6.13644701285272
Q99871-2	HAUS7	0.105877330512736	3.33220385599423	1.80002300970312	0.12068911751033	0.433396812028151	-6.13743141943029
Q6ZRP7	QSOX2	-0.142811281648837	3.29496945384857	-1.80797075237856	0.119355100131987	0.430610091148786	-6.13819234561039
Q9Y2U5	MAP3K2	0.0841860426594511	3.35742248802528	1.39457168965854	0.211385350534679	0.557423760374474	-6.1390882187759
Q6EEV4-1	POLR2M	0.139632524008085	3.25020671508948	0.917964144834109	0.393175271826117	0.736494910212349	-6.14031547397634
Q14149	MORC3	0.070314409423418	3.34876452086094	2.21229670984991	0.0677878191461622	0.33228235668355	-6.14165642828967
Q9NTW7-2	ZFP64	0.0962433686912765	3.3286402412463	0.985377164658885	0.361562603280158	0.713351762469876	-6.14289859661432
Q9NYP3-1	DONSON	0.102459699892783	3.34611201298417	0.97051484591202	0.368355789811316	0.717645766715852	-6.14608030192268
P07093-3	SERPINE2	0.104526353663214	3.36289460120098	0.863037809683788	0.420457634105209	0.760547016335016	-6.14687308516895
Q8N0X7	SPG20; SPART	0.0621096152611112	3.33728535290215	2.21435084455466	0.0675940531359029	0.332195375753094	-6.1469494231129
Q969R5-1	L3MBTL2	-0.105486157278938	3.31025208303941	-1.95354663235045	0.0973436861153259	0.391781338631041	-6.14725203959417
Q8IWB6-3	TEX14	-0.114949425621681	3.31026673716371	-1.04976867988793	0.333271019659975	0.69314511967223	-6.14745627006913
Q8WVQ1	CANT1	-0.0988887767159037	3.35246104674482	-1.72325537605343	0.134347745252436	0.453042138946075	-6.14746729142276
Q96DA2	RAB39B	-0.0898536590252935	3.3348290254552	-1.59106019253124	0.161441663282699	0.493868463168997	-6.14887703340633
P53814-5	SMTN	-0.0894722360080005	3.33056581869836	-1.09410896066271	0.314852084322623	0.677645025686338	-6.15254126315989
Q86UY6	NAA40	0.0752634360756508	3.3467143156964	1.72476467288088	0.134065255317093	0.452740529548651	-6.15363997432453
Q9UM13	ANAPC10	-0.131657358161549	3.35139107319251	-1.69632706432381	0.139485715577737	0.462879789188132	-6.15523697117094
P10253	GAA	-0.112222519246919	3.30621393532559	-2.07228062537359	0.082430717176057	0.364998846376848	-6.15559609390133
Q8IWY8-1	ZSCAN29	0.0760770741210895	3.35575440120605	1.67576360307989	0.14353644236913	0.470573033951979	-6.15570900563022
Q6NWY9	PRPF40B	0.0899807423039194	3.34860667326561	0.958938916421077	0.373715770073431	0.722354075987076	-6.15677424619694
Q9H583	HEATR1	-0.243547662258971	3.2747505360901	-2.32717172215394	0.0577831158179816	0.309789267618556	-6.15935246065585
Q8TEB1	DCAF11	0.0689037269329273	3.3390654521989	1.73605421330452	0.131970422558893	0.45046928651977	-6.16074836034968
Q9Y6G5	COMMD10	-0.0655896618660064	3.32325715838489	-1.72573223230894	0.133884463443247	0.452357995496599	-6.16134312390208
Q9BTU6	PI4K2A	-0.0884016075024834	3.35475126512817	-1.7533318206858	0.128825899640622	0.445833433673639	-6.16297261020408
Q9UPS6-1	SETD1B	0.0934933420448515	3.34391109412601	1.6500993194945	0.148750754304718	0.476856485091679	-6.16479124747627
Q6P2D0-1	ZFP1	0.141776075537116	3.47181075570562	1.04787174359739	0.3340781951844	0.693623770602876	-6.16539705456005
P16989-1	CSDA; YBX3	0.175139964587632	3.39153296571149	1.73307317402624	0.132520463258185	0.450933013626123	-6.16627693482963
Q3KRA9-2	ALKBH6	-0.0736414874872955	3.22476518549276	-1.73472022359932	0.132216286561835	0.450584496421309	-6.16723700805783
P18583-3	SON	0.083377726814889	3.38787467359205	0.833011351989156	0.435953066623629	0.769936846077393	-6.1675571266564
Q0ZGT2	NEXN	-0.114136417677759	3.30681916553893	-1.21144424699908	0.270159437301902	0.633999380007966	-6.16802669568093
Q8WXE9-3	STON2	-0.116715050114326	3.31712137363942	-1.4775727844642	0.188758359290768	0.530713465618199	-6.16963281845477
Q86WW8	COA5	-0.235174731884683	3.3891760678614	-1.31857287449241	0.234234451722363	0.590655184998056	-6.17045453781878
A6NNY8	USP27X	0.0871080836887188	3.32667201348147	0.691683086039471	0.514359110630464	0.827420418061011	-6.17293952721532
P00338-3	LDHA	0.0588354374459926	3.34264672448759	2.71323374642869	0.0340659776489963	0.236275414335688	-6.17523677477677
Q96CW1	AP2M1	-0.0858774733628456	3.32525933497304	-1.96333405449885	0.0960178896558202	0.390601008314509	-6.17670925710898
[truncated: 4,701 more rows]
