# Supplementary figures and images for: Thalidomide promotes degradation of SALL4, a transcription factor implicated in Duane Radial Ray syndrome
Source: eLife journal article supplement (doi:10.7554/elife.38430), 2018-08-01

**Figure 2 - source data 2**

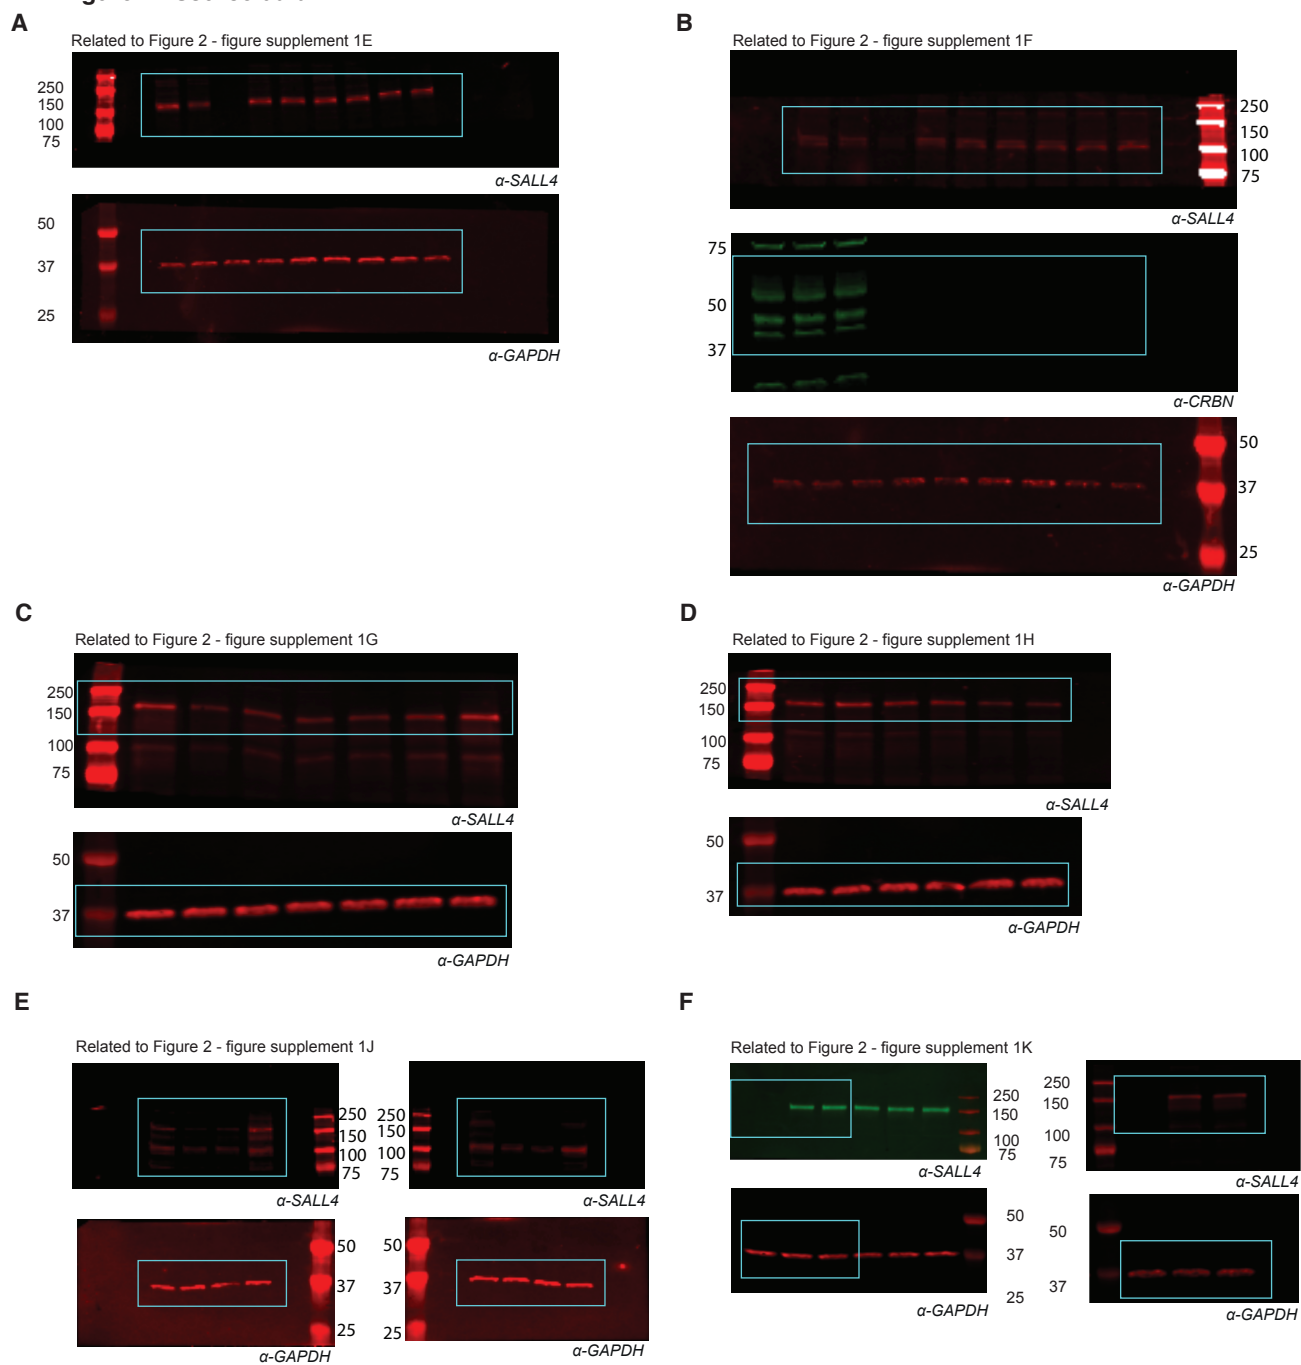

Supplement: supp [file elife-38430-supp-v1.zip › elife_poa_e38430_Figure_2_source_data_2.pdf]

**Figure 2 - source data 1**

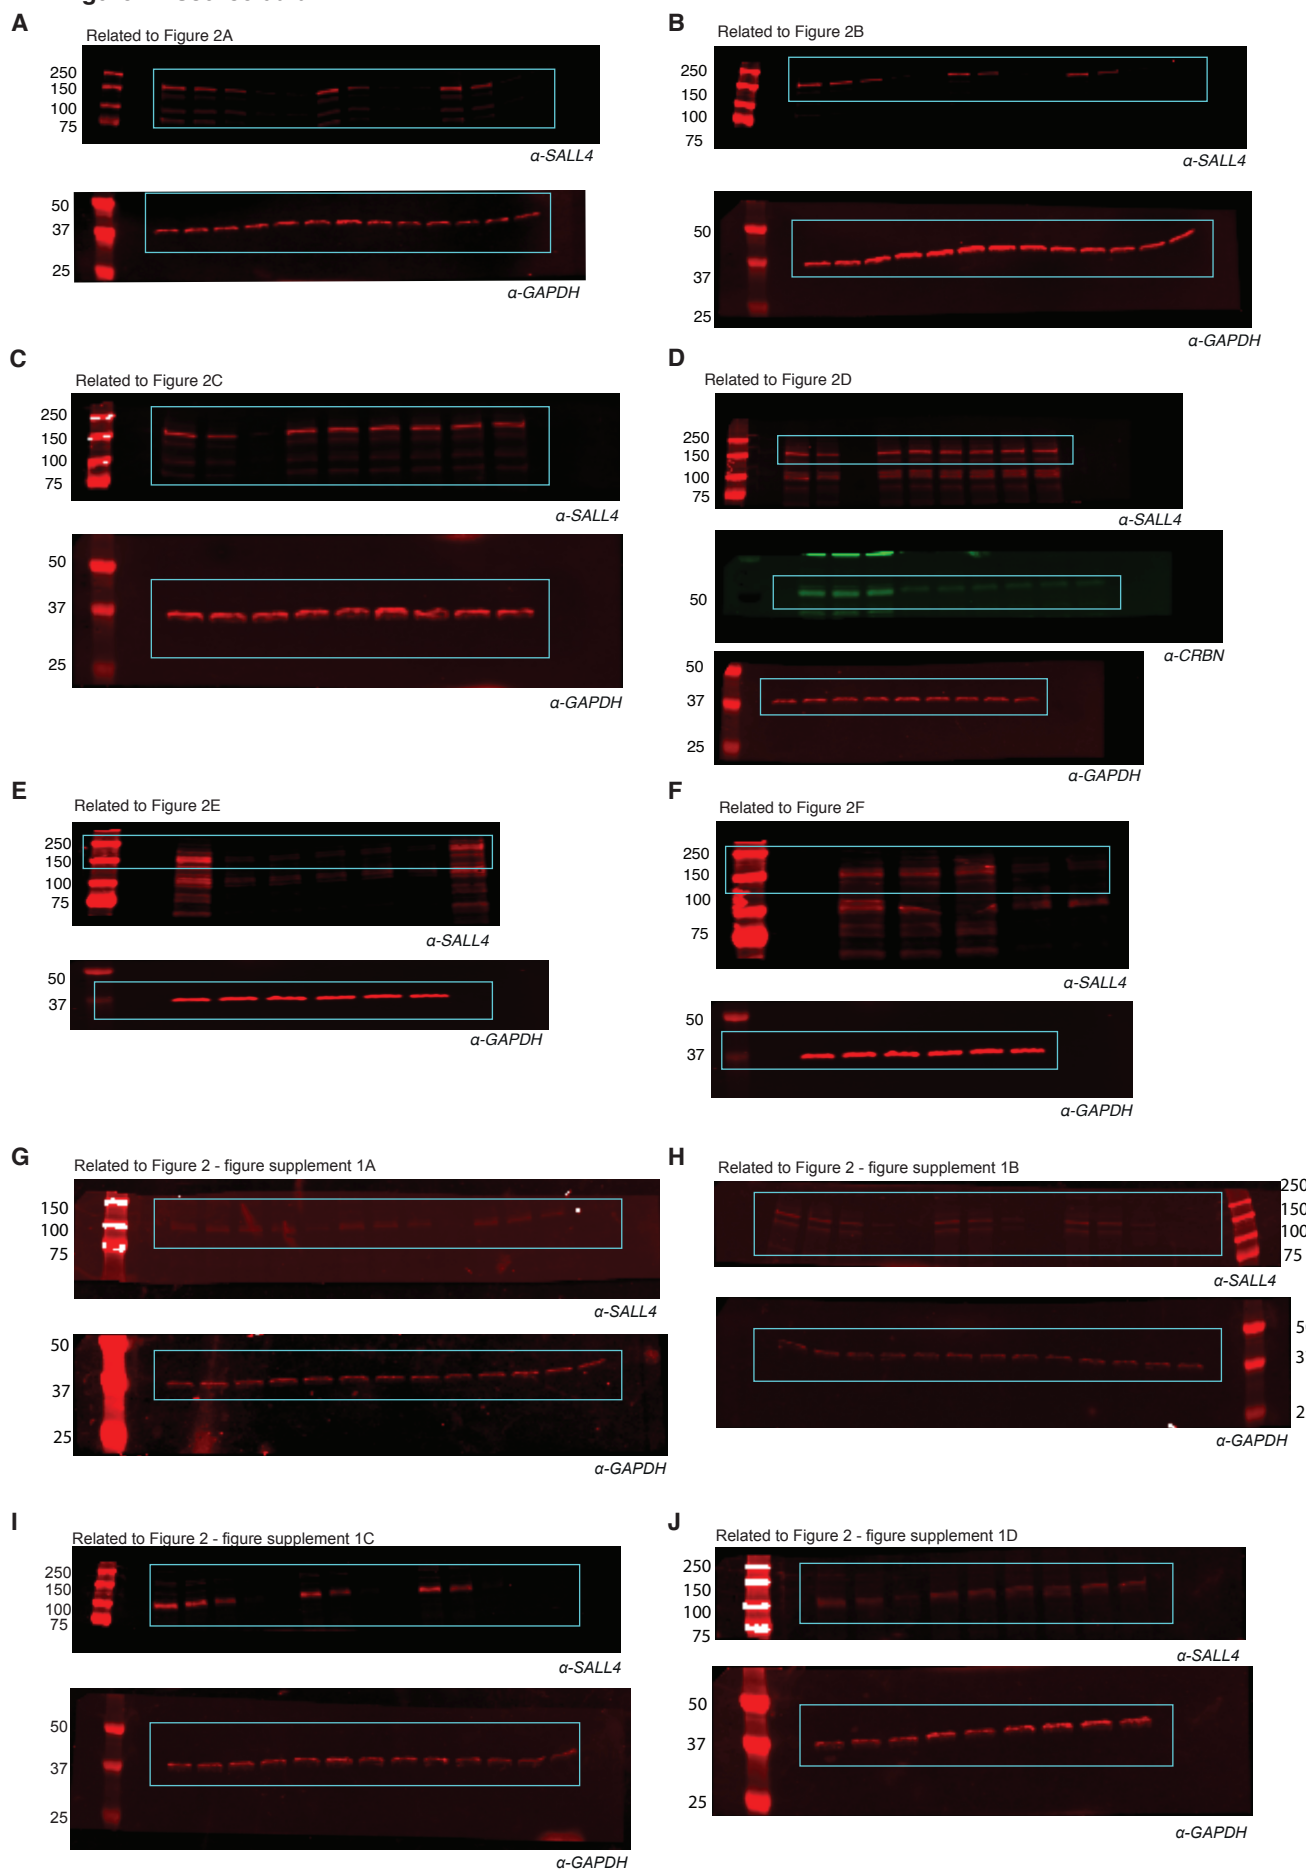

Supplement: supp [file elife-38430-supp-v1.zip › elife_poa_e38430_Figure_2_source_data_1.pdf]

Figure 1 - source data 2

A

Related to Figure 1 - figure supplement 2D

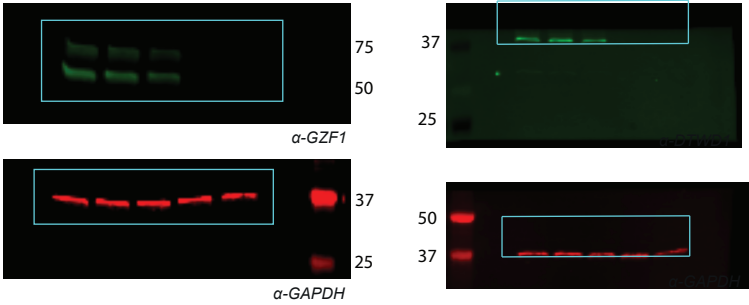

Supplement: supp [file elife-38430-supp-v1.zip › elife_poa_e38430_Figure_1_source_data_15.pdf]

**Figure 4 - source data 1**

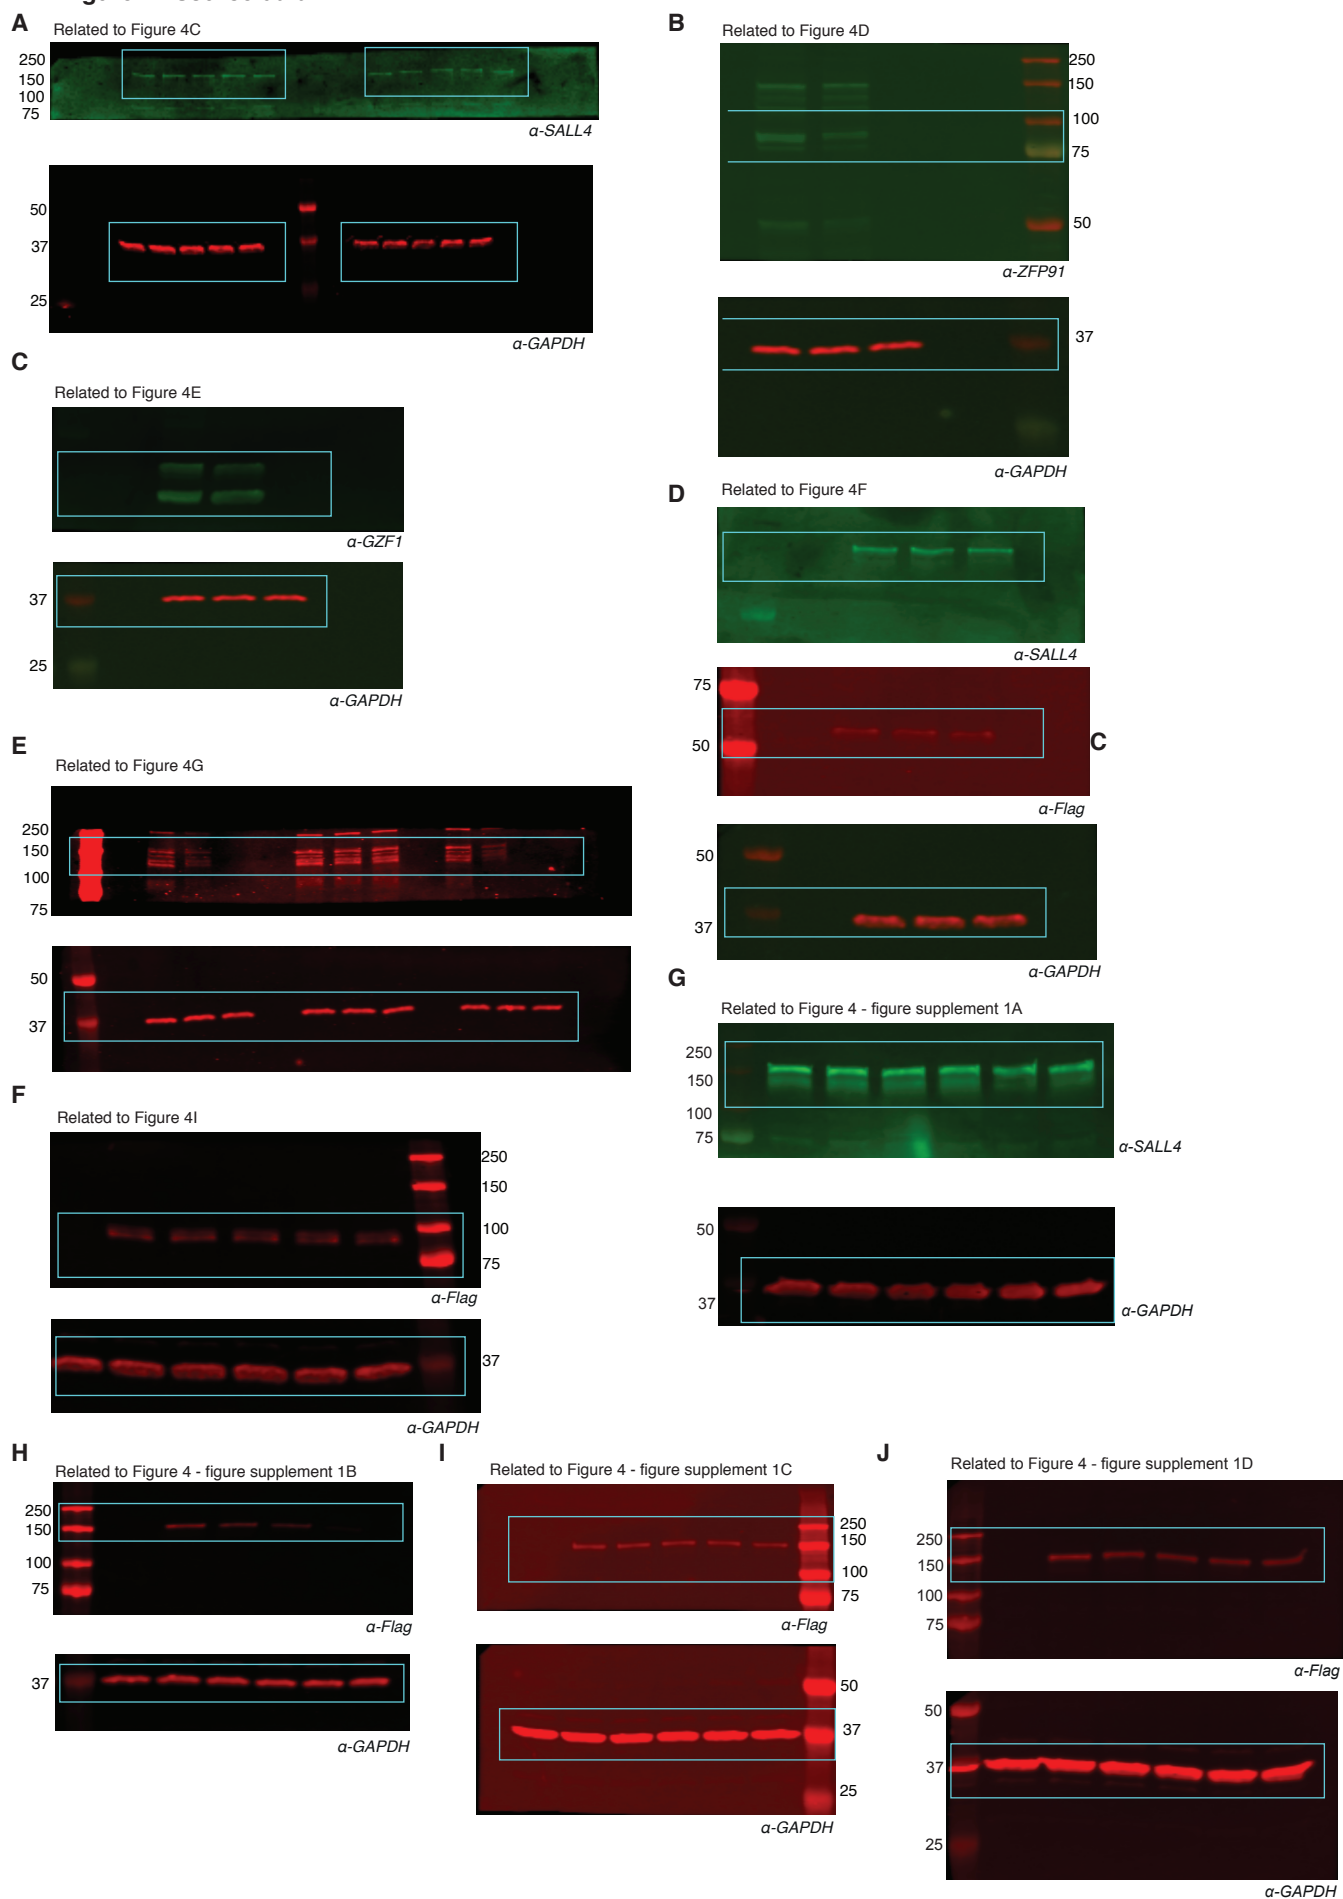

Supplement: supp [file elife-38430-supp-v1.zip › elife_poa_e38430_Figure_4_source_data_1.pdf]

Figure 3 - source data 1

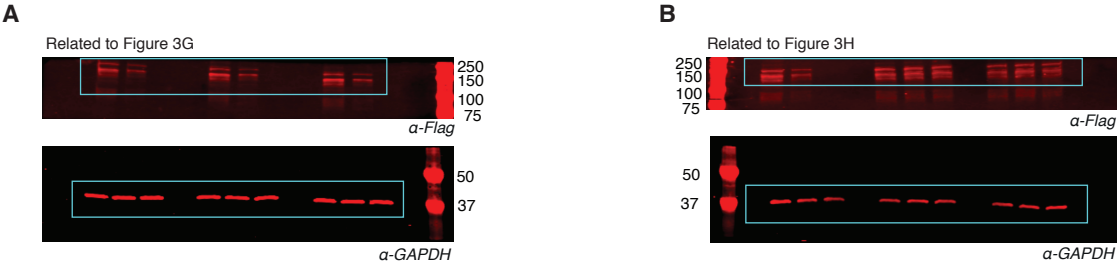

I

J

Supplement: supp [file elife-38430-supp-v1.zip › elife_poa_e38430_Figure_3_source_data_1.pdf]
